# Supplementary material
Source: PubMed Central journal article supplement (PMC2905865)
Supplement: NIHMS205303-supplement-Supplementary.pdf [file NIHMS205303-supplement-Supplementary.pdf]

# Supplementary Data

for

Quantitative Changes in the Mitochondrial Proteome from Subjects with Mild Cognitive

Impairment, Early Stage and Late Stage Alzheimer's disease

Table 1 - 112 unique, non-redundant proteins identified and quantified in at least two of the three analytical replicates for all three disease stages.

Table 2 - MCI mitochondrial samples, Protein Summary

Table 3 - MCI mitochondrial samples, Experiment 1

Table 4 - MCI mitochondrial samples, Experiment 2

Table 5 - MCI mitochondrial samples, Experiment 3

Table 6 - EAD Mitochondrial Study, Protein Summary

Table 7 - EAD Mitochondrial Study, Experiment 1

Table 8 - EAD Mitochondrial Study, Experiment 2

Table 9 - EAD Mitochondrial Study, Experiment 3

Table 10 - LAD Mitochondrial Study, Protein Summary

Table 11 - LAD Mitochondrial Study, Experiment 1

Table 12 - LAD Mitochondrial Study, Experiment 2

Table 13 - LAD Mitochondrial Study, Experiment 3

**Supplemental Table 1. 112 unique, non-redundant proteins identified and quantified in at least two of the three analytical replicates for all three disease stages.**

| Description                                                                                                                                                                                                                    | Data  | MCI  | EAD  | LAD  |
|--------------------------------------------------------------------------------------------------------------------------------------------------------------------------------------------------------------------------------|-------|------|------|------|
| AATM_HUMAN (P00505) Aspartate aminotransferase, mitochondrial precursor (EC 2.6.1.1) (Transaminase A) (Glutamate oxaloacetate transaminase 2) [MASS=47475]                                                                     | Mean  | 1.43 | 1.70 | 1.31 |
|                                                                                                                                                                                                                                | SEM   | 0.07 | 0.09 | 0.09 |
|                                                                                                                                                                                                                                | Count | 3.00 | 3.00 | 3.00 |
| ACON_HUMAN (Q99798) Aconitate hydratase, mitochondrial precursor (EC 4.2.1.3) (Citrate hydro-lyase) (Aconitase) [MASS=85425]                                                                                                   | Mean  | 1.24 | 1.61 | 1.19 |
|                                                                                                                                                                                                                                | SEM   | 0.05 | 0.17 | 0.18 |
|                                                                                                                                                                                                                                | Count | 3.00 | 2.00 | 3.00 |
| ACPM_HUMAN (O14561) Acyl carrier protein, mitochondrial precursor (ACP) (NADH-ubiquinone oxidoreductase 9.6 kDa subunit) (CI-SDAP) [MASS=17417]                                                                                | Mean  | 1.64 | 1.50 | 1.35 |
|                                                                                                                                                                                                                                | SEM   | 0.41 | 0.11 | 0.10 |
|                                                                                                                                                                                                                                | Count | 2.00 | 2.00 | 3.00 |
| ADT1_HUMAN (P12235) ADP/ATP translocase 1 (Adenine nucleotide translocator 1) (ANT 1) (ADP,ATP carrier protein 1) (Solute carrier family 25 member 4) (ADP,ATP carrier protein, heart/skeletal muscle isoform T1) [MASS=32933] | Mean  | 1.22 | 1.79 | 1.35 |
|                                                                                                                                                                                                                                | SEM   | 0.10 | 0.05 | 0.13 |
|                                                                                                                                                                                                                                | Count | 3.00 | 3.00 | 3.00 |
| ALBU_HUMAN (P02768) Serum albumin precursor [MASS=69366]                                                                                                                                                                       | Mean  | 0.65 | 0.70 | 1.01 |
|                                                                                                                                                                                                                                | SEM   | 0.02 | 0.03 | 0.02 |
|                                                                                                                                                                                                                                | Count | 3.00 | 2.00 | 2.00 |
| ALDH2_HUMAN (P05091) Aldehyde dehydrogenase, mitochondrial precursor (EC 1.2.1.3) (ALDH class 2) (ALDHI) (ALDH-E2) [MASS=56381]                                                                                                | Mean  | 2.11 | 1.54 | 1.17 |
|                                                                                                                                                                                                                                | SEM   | 0.36 | 0.15 | 0.06 |
|                                                                                                                                                                                                                                | Count | 3.00 | 3.00 | 3.00 |
| ALDOA_HUMAN (P04075) Fructose-bisphosphate aldolase A (EC 4.1.2.13) (Muscle-type aldolase) (Lung cancer antigen NY-LU-1) [MASS=39289]                                                                                          | Mean  | 0.56 | 0.74 | 1.09 |
|                                                                                                                                                                                                                                | SEM   | 0.05 | 0.06 | 0.10 |
|                                                                                                                                                                                                                                | Count | 2.00 | 2.00 | 3.00 |
| ANXA2_HUMAN (P07355) Annexin A2 (Annexin II) (Lipocortin II) (Calpactin I heavy chain) (Chromobindin-8) (p36) (Protein I) (Placental anticoagulant protein IV) (PAP-IV) [MASS=38473]                                           | Mean  | 1.40 | 1.64 | 1.28 |

|                                                                                                                                                                                                                                                                |       |      |      |      |
|----------------------------------------------------------------------------------------------------------------------------------------------------------------------------------------------------------------------------------------------------------------|-------|------|------|------|
|                                                                                                                                                                                                                                                                | SEM   | 0.14 | 0.01 | 0.27 |
|                                                                                                                                                                                                                                                                | Count | 3.00 | 2.00 | 2.00 |
| AT1A1_HUMAN (P05023) Sodium/potassium-transporting ATPase alpha-1 chain precursor (EC 3.6.3.9) (Sodium pump 1) (Na+/K+ ATPase 1) [MASS=112895]                                                                                                                 | Mean  | 0.44 | 0.67 | 0.96 |
|                                                                                                                                                                                                                                                                | SEM   | 0.02 | 0.13 | 0.05 |
|                                                                                                                                                                                                                                                                | Count | 3.00 | 2.00 | 3.00 |
| AT1A3_HUMAN (P13637) Sodium/potassium-transporting ATPase alpha-3 chain (EC 3.6.3.9) (Sodium pump 3) (Na+/K+ ATPase 3) (Alpha(III)) [MASS=111734]                                                                                                              | Mean  | 0.49 | 0.55 | 0.99 |
|                                                                                                                                                                                                                                                                | SEM   | 0.02 | 0.02 | 0.04 |
|                                                                                                                                                                                                                                                                | Count | 3.00 | 3.00 | 3.00 |
| AT1B1_HUMAN (P05026) Sodium/potassium-transporting ATPase subunit beta-1 (Sodium/potassium-dependent ATPase beta-1 subunit) [MASS=35061]                                                                                                                       | Mean  | 0.46 | 0.53 | 1.04 |
|                                                                                                                                                                                                                                                                | SEM   | 0.01 | 0.00 | 0.11 |
|                                                                                                                                                                                                                                                                | Count | 3.00 | 3.00 | 3.00 |
| AT2A2_HUMAN (P16615) Sarcoplasmic/endoplasmic reticulum calcium ATPase 2 (EC 3.6.3.8) (Calcium pump 2) (SERCA2) (SR Ca(2+)-ATPase 2) (Calcium-transporting ATPase sarcoplasmic reticulum type, slow twitch skeletal muscle isoform) (Endoplasmic reticulum cla | Mean  | 0.97 | 0.98 | 0.99 |
|                                                                                                                                                                                                                                                                | SEM   | 0.04 | 0.07 | 0.02 |
|                                                                                                                                                                                                                                                                | Count | 3.00 | 2.00 | 2.00 |
| ATP8_HUMAN (P03928) ATP synthase protein 8 (EC 3.6.3.14) (ATPase subunit 8) (A6L) [MASS=7992]                                                                                                                                                                  | Mean  | 1.23 | 1.88 | 1.26 |
|                                                                                                                                                                                                                                                                | SEM   | 0.15 | 0.06 | 0.08 |
|                                                                                                                                                                                                                                                                | Count | 3.00 | 2.00 | 3.00 |
| ATPG_HUMAN (P36542) ATP synthase gamma chain, mitochondrial precursor (EC 3.6.3.14) [MASS=32996]                                                                                                                                                               | Mean  | 1.33 | 1.95 | 1.25 |
|                                                                                                                                                                                                                                                                | SEM   | 0.07 | 0.07 | 0.13 |
|                                                                                                                                                                                                                                                                | Count | 3.00 | 3.00 | 3.00 |
| C1QBP_HUMAN (Q07021) Complement component 1 Q subcomponent-binding protein, mitochondrial precursor (Glycoprotein gC1qBP) (C1qBP) (GC1q-R protein) (Hyaluronan-binding protein 1) (Mitochondrial matrix protein p32) (p33) [MASS=31362]                        | Mean  | 2.20 | 1.56 | 1.59 |
|                                                                                                                                                                                                                                                                | SEM   | 0.93 | 0.09 | 0.05 |
|                                                                                                                                                                                                                                                                | Count | 3.00 | 2.00 | 3.00 |

|                                                                                                                                                                                                                                                                 |       |      |      |      |
|-----------------------------------------------------------------------------------------------------------------------------------------------------------------------------------------------------------------------------------------------------------------|-------|------|------|------|
| C560_HUMAN (Q99643) Succinate dehydrogenase cytochrome b560 subunit, mitochondrial precursor (Integral membrane protein CII-3) (QPs1) (QPs-1) (Succinate dehydrogenase complex subunit C) (Succinate-ubiquinone oxidoreductase cytochrome B large subunit) (CY) | Mean  | 1.02 | 1.45 | 1.68 |
|                                                                                                                                                                                                                                                                 | SEM   | 0.06 | 0.08 | 0.13 |
|                                                                                                                                                                                                                                                                 | Count | 3.00 | 3.00 | 3.00 |
| CD59_HUMAN (P13987) CD59 glycoprotein precursor (Membrane attack complex inhibition factor) (MACIF) (MAC-inhibitory protein) (MAC-IP) (Protectin) (MEM43 antigen) (Membrane inhibitor of reactive lysis) (MIRL) (20 kDa homologous restriction factor) (HRF-20) | Mean  | 0.49 | 0.59 | 0.83 |
|                                                                                                                                                                                                                                                                 | SEM   | 0.06 | 0.02 | 0.06 |
|                                                                                                                                                                                                                                                                 | Count | 3.00 | 2.00 | 3.00 |
| CD9_HUMAN (P21926) CD9 antigen (p24) (Leukocyte antigen MIC3) (Motility-related protein) (MRP-1) (Tetraspanin-29) (Tspan-29) [MASS=25285]                                                                                                                       | Mean  | 0.95 | 0.94 | 0.16 |
|                                                                                                                                                                                                                                                                 | SEM   | 0.04 | 0.02 | 0.01 |
|                                                                                                                                                                                                                                                                 | Count | 2.00 | 2.00 | 2.00 |
| CH60_HUMAN (P10809) 60 kDa heat shock protein, mitochondrial precursor (Hsp60) (60 kDa chaperonin) (CPN60) (Heat shock protein 60) (HSP-60) (Mitochondrial matrix protein P1) (P60 lymphocyte protein) (HuCHA60) [MASS=61054]                                   | Mean  | 1.29 | 1.67 | 1.23 |
|                                                                                                                                                                                                                                                                 | SEM   | 0.05 | 0.10 | 0.02 |
|                                                                                                                                                                                                                                                                 | Count | 3.00 | 3.00 | 3.00 |
| CHCH3_HUMAN (Q9NX63) Coiled-coil-helix-coiled-coil-helix domain-containing protein 3 [MASS=26152]                                                                                                                                                               | Mean  | 1.27 | 1.41 | 1.10 |
|                                                                                                                                                                                                                                                                 | SEM   | 0.10 | 0.09 | 0.13 |
|                                                                                                                                                                                                                                                                 | Count | 3.00 | 2.00 | 3.00 |
| CISY_HUMAN (O75390) Citrate synthase, mitochondrial precursor (EC 2.3.3.1) [MASS=51712]                                                                                                                                                                         | Mean  | 1.46 | 1.69 | 1.30 |
|                                                                                                                                                                                                                                                                 | SEM   | 0.07 | 0.19 | 0.05 |
|                                                                                                                                                                                                                                                                 | Count | 3.00 | 3.00 | 3.00 |
| CJ070_HUMAN (Q9NZ45) Protein C10orf70 [MASS=12199]                                                                                                                                                                                                              | Mean  | 1.16 | 1.61 | 1.24 |
|                                                                                                                                                                                                                                                                 | SEM   | 0.08 | 0.12 | 0.04 |
|                                                                                                                                                                                                                                                                 | Count | 3.00 | 3.00 | 3.00 |
| CLH1_HUMAN (Q00610) Clathrin heavy chain 1 (CLH-17) [MASS=191482]                                                                                                                                                                                               | Mean  | 0.61 | 0.55 | 1.25 |
|                                                                                                                                                                                                                                                                 | SEM   | 0.08 | 0.02 | 0.13 |
|                                                                                                                                                                                                                                                                 | Count | 3.00 | 2.00 | 2.00 |

|                                                                                                                                                                                                              |       |      |      |      |
|--------------------------------------------------------------------------------------------------------------------------------------------------------------------------------------------------------------|-------|------|------|------|
| CMC1_HUMAN (O75746) Calcium-binding mitochondrial carrier protein Aralar1<br>(Mitochondrial aspartate glutamate carrier 1) (Solute carrier family 25 member 12)<br>[MASS=74755]                              | Mean  | 1.07 | 1.43 | 1.05 |
|                                                                                                                                                                                                              | SEM   | 0.08 | 0.15 | 0.07 |
|                                                                                                                                                                                                              | Count | 3.00 | 3.00 | 3.00 |
| CN37_HUMAN (P09543) 2',3'-cyclic-nucleotide 3'-phosphodiesterase (EC 3.1.4.37) (CNP)<br>(CNPase) [MASS=47578]                                                                                                | Mean  | 1.01 | 0.97 | 0.96 |
|                                                                                                                                                                                                              | SEM   | 0.05 | 0.03 | 0.05 |
|                                                                                                                                                                                                              | Count | 3.00 | 3.00 | 3.00 |
| COX5B_HUMAN (P10606) Cytochrome c oxidase polypeptide Vb, mitochondrial precursor<br>(EC 1.9.3.1) [MASS=13696]                                                                                               | Mean  | 1.44 | 1.87 | 1.35 |
|                                                                                                                                                                                                              | SEM   | 0.10 | 0.41 | 0.03 |
|                                                                                                                                                                                                              | Count | 3.00 | 2.00 | 3.00 |
| COX7C_HUMAN (P15954) Cytochrome c oxidase polypeptide VIIc, mitochondrial<br>precursor (EC 1.9.3.1) [MASS=7245]                                                                                              | Mean  | 1.02 | 1.49 | 1.14 |
|                                                                                                                                                                                                              | SEM   | 0.02 | 0.23 | 0.06 |
|                                                                                                                                                                                                              | Count | 3.00 | 2.00 | 3.00 |
| CRTC_HUMAN (P27797) Calreticulin precursor (CRP55) (Calregulin) (HACBP) (ERp60)<br>(grp60) [MASS=48141]                                                                                                      | Mean  | 1.86 | 1.41 | 1.21 |
|                                                                                                                                                                                                              | SEM   | 0.09 | 0.21 | 0.15 |
|                                                                                                                                                                                                              | Count | 3.00 | 3.00 | 2.00 |
| CSPG2_HUMAN (P13611) Versican core protein precursor (Large fibroblast proteoglycan)<br>(Chondroitin sulfate proteoglycan core protein 2) (PG-M) (Glial hyaluronate-binding protein)<br>(GHAP) [MASS=372817] | Mean  | 0.52 | 0.44 | 0.78 |
|                                                                                                                                                                                                              | SEM   | 0.05 | 0.04 | 0.06 |
|                                                                                                                                                                                                              | Count | 3.00 | 2.00 | 2.00 |
| CY1_HUMAN (P08574) Cytochrome c1, heme protein, mitochondrial precursor<br>(Cytochrome c-1) [MASS=35390]                                                                                                     | Mean  | 1.18 | 1.81 | 1.26 |
|                                                                                                                                                                                                              | SEM   | 0.10 | 0.18 | 0.05 |
|                                                                                                                                                                                                              | Count | 3.00 | 3.00 | 3.00 |
| DHE3_HUMAN (P00367) Glutamate dehydrogenase 1, mitochondrial precursor (EC<br>1.4.1.3) (GDH) [MASS=61397]                                                                                                    | Mean  | 2.40 | 1.61 | 1.25 |
|                                                                                                                                                                                                              | SEM   | 0.14 | 0.09 | 0.04 |
|                                                                                                                                                                                                              | Count | 3.00 | 3.00 | 3.00 |
| DHSA_HUMAN (P31040) Succinate dehydrogenase [ubiquinone] flavoprotein subunit,<br>mitochondrial precursor (EC 1.3.5.1) (Fp) (Flavoprotein subunit of complex II)<br>[MASS=72691]                             | Mean  | 1.33 | 1.37 | 1.26 |

|                                                                                                                                                                                                                                                              |       |      |      |      |
|--------------------------------------------------------------------------------------------------------------------------------------------------------------------------------------------------------------------------------------------------------------|-------|------|------|------|
|                                                                                                                                                                                                                                                              | SEM   | 0.13 | 0.11 | 0.14 |
|                                                                                                                                                                                                                                                              | Count | 3.00 | 3.00 | 3.00 |
| DHSB_HUMAN (P21912) Succinate dehydrogenase [ubiquinone] iron-sulfur protein, mitochondrial precursor (EC 1.3.5.1) (Ip) (Iron-sulfur subunit of complex II) [MASS=31630]                                                                                     | Mean  | 1.68 | 1.79 | 1.28 |
|                                                                                                                                                                                                                                                              | SEM   | 0.31 | 0.07 | 0.10 |
|                                                                                                                                                                                                                                                              | Count | 3.00 | 3.00 | 3.00 |
| DLDH_HUMAN (P09622) Dihydrolipoyl dehydrogenase, mitochondrial precursor (EC 1.8.1.4) (Dihydrolipoamide dehydrogenase) (Glycine cleavage system L protein) [MASS=54150]                                                                                      | Mean  | 1.36 | 1.49 | 1.14 |
|                                                                                                                                                                                                                                                              | SEM   | 0.07 | 0.18 | 0.15 |
|                                                                                                                                                                                                                                                              | Count | 3.00 | 3.00 | 3.00 |
| DPYL2_HUMAN (Q16555) Dihydropyrimidinase-related protein 2 (DRP-2) (Collapsin response mediator protein 2) (CRMP-2) (N2A3) [MASS=62293]                                                                                                                      | Mean  | 0.56 | 0.61 | 0.98 |
|                                                                                                                                                                                                                                                              | SEM   | 0.04 | 0.02 | 0.09 |
|                                                                                                                                                                                                                                                              | Count | 3.00 | 3.00 | 3.00 |
| DYN1_HUMAN (Q05193) Dynamin-1 (EC 3.6.5.5) [MASS=97407]                                                                                                                                                                                                      | Mean  | 0.70 | 0.73 | 1.11 |
|                                                                                                                                                                                                                                                              | SEM   | 0.16 | 0.12 | 0.15 |
|                                                                                                                                                                                                                                                              | Count | 3.00 | 2.00 | 2.00 |
| EAA2_HUMAN (P43004) Excitatory amino acid transporter 2 (Sodium-dependent glutamate/aspartate transporter 2) [MASS=62104]                                                                                                                                    | Mean  | 0.44 | 0.50 | 0.83 |
|                                                                                                                                                                                                                                                              | SEM   | 0.05 | 0.05 | 0.05 |
|                                                                                                                                                                                                                                                              | Count | 3.00 | 2.00 | 3.00 |
| ECHA_HUMAN (P40939) Trifunctional enzyme subunit alpha, mitochondrial precursor (TP-alpha) (78 kDa gastrin-binding protein) [Includes: Long-chain enoyl-CoA hydratase (EC 4.2.1.17); Long chain 3-hydroxyacyl-CoA dehydrogenase (EC 1.1.1.211)] [MASS=82999] | Mean  | 1.37 | 1.37 | 1.20 |
|                                                                                                                                                                                                                                                              | SEM   | 0.07 | 0.06 | 0.15 |
|                                                                                                                                                                                                                                                              | Count | 3.00 | 2.00 | 3.00 |
| ECHM_HUMAN (P30084) Enoyl-CoA hydratase, mitochondrial precursor (EC 4.2.1.17) (Short chain enoyl-CoA hydratase) (SCEH) (Enoyl-CoA hydratase 1) [MASS=31387]                                                                                                 | Mean  | 1.31 | 1.95 | 1.31 |
|                                                                                                                                                                                                                                                              | SEM   | 0.23 | 0.14 | 0.23 |
|                                                                                                                                                                                                                                                              | Count | 2.00 | 3.00 | 2.00 |
| EF1A1_HUMAN (P68104) Elongation factor 1-alpha 1 (EF-1-alpha-1) (Elongation factor 1 A-1) (eEF1A-1) (Elongation factor Tu) (EF-Tu) [MASS=50141]                                                                                                              | Mean  | 1.11 | 1.40 | 1.08 |
|                                                                                                                                                                                                                                                              | SEM   | 0.27 | 0.56 | 0.11 |

|                                                                                                                                                                                                                                                                |       |      |      |      |
|----------------------------------------------------------------------------------------------------------------------------------------------------------------------------------------------------------------------------------------------------------------|-------|------|------|------|
|                                                                                                                                                                                                                                                                | Count | 2.00 | 3.00 | 2.00 |
| EFTU_HUMAN (P49411) Elongation factor Tu, mitochondrial precursor (EF-Tu) (P43) [MASS=49541]                                                                                                                                                                   | Mean  | 1.36 | 1.57 | 1.19 |
|                                                                                                                                                                                                                                                                | SEM   | 0.06 | 0.22 | 0.03 |
|                                                                                                                                                                                                                                                                | Count | 3.00 | 2.00 | 3.00 |
| ETFD_HUMAN (Q16134) Electron transfer flavoprotein-ubiquinone oxidoreductase, mitochondrial precursor (EC 1.5.5.1) (ETF-QO) (ETF-ubiquinone oxidoreductase) (ETF dehydrogenase) (Electron-transferring-flavoprotein dehydrogenase) [MASS=68507]                | Mean  | 1.91 | 1.96 | 1.22 |
|                                                                                                                                                                                                                                                                | SEM   | 0.08 | 0.18 | 0.22 |
|                                                                                                                                                                                                                                                                | Count | 3.00 | 3.00 | 3.00 |
| G3P_HUMAN (P04406) Glyceraldehyde-3-phosphate dehydrogenase (EC 1.2.1.12) (GAPDH) [MASS=35922]                                                                                                                                                                 | Mean  | 0.70 | 0.75 | 0.89 |
|                                                                                                                                                                                                                                                                | SEM   | 0.07 | 0.05 | 0.03 |
|                                                                                                                                                                                                                                                                | Count | 3.00 | 3.00 | 3.00 |
| GABT_HUMAN (P80404) 4-aminobutyrate aminotransferase, mitochondrial precursor (EC 2.6.1.19) ((S)-3-amino-2-methylpropionate transaminase) (EC 2.6.1.22) (Gamma-amino-N-butyrate transaminase) (GABA transaminase) (GABA aminotransferase) (GABA-AT) (GABA-T) ( | Mean  | 1.18 | 1.27 | 1.20 |
|                                                                                                                                                                                                                                                                | SEM   | 0.07 | 0.21 | 0.03 |
|                                                                                                                                                                                                                                                                | Count | 3.00 | 3.00 | 3.00 |
| GBB1_HUMAN (P62873) Guanine nucleotide-binding protein G(I)/G(S)/G(T) subunit beta 1 (Transducin beta chain 1) [MASS=37246]                                                                                                                                    | Mean  | 0.55 | 0.58 | 0.99 |
|                                                                                                                                                                                                                                                                | SEM   | 0.01 | 0.01 | 0.01 |
|                                                                                                                                                                                                                                                                | Count | 3.00 | 3.00 | 3.00 |
| GBG2_HUMAN (P59768) Guanine nucleotide-binding protein G(I)/G(S)/G(O) gamma-2 subunit precursor (G gamma-I) [MASS=7719]                                                                                                                                        | Mean  | 0.54 | 0.58 | 0.95 |
|                                                                                                                                                                                                                                                                | SEM   | 0.04 | 0.04 | 0.14 |
|                                                                                                                                                                                                                                                                | Count | 3.00 | 2.00 | 2.00 |
| GHC1_HUMAN (Q9H936) Mitochondrial glutamate carrier 1 (GC-1) (Glutamate/H(+) symporter 1) (Solute carrier family 25 member 22) [MASS=34470]                                                                                                                    | Mean  | 0.93 | 1.25 | 1.13 |
|                                                                                                                                                                                                                                                                | SEM   | 0.15 | 0.02 | 0.11 |
|                                                                                                                                                                                                                                                                | Count | 3.00 | 3.00 | 3.00 |
| GLSK_HUMAN (O94925) Glutaminase kidney isoform, mitochondrial precursor (EC 3.5.1.2) (GLS) (L-glutamine amidohydrolase) (K-glutaminase) [MASS=73461]                                                                                                           | Mean  | 1.30 | 1.61 | 1.44 |
|                                                                                                                                                                                                                                                                | SEM   | 0.09 | 0.11 | 0.08 |
|                                                                                                                                                                                                                                                                | Count | 3.00 | 3.00 | 3.00 |

|                                                                                                                                                                                    |       |      |      |      |
|------------------------------------------------------------------------------------------------------------------------------------------------------------------------------------|-------|------|------|------|
| GNAO1_HUMAN (P09471) Guanine nucleotide-binding protein G(o) subunit alpha 1 [MASS=39919]                                                                                          | Mean  | 0.68 | 0.54 | 1.04 |
|                                                                                                                                                                                    | SEM   | 0.19 | 0.05 | 0.18 |
|                                                                                                                                                                                    | Count | 3.00 | 2.00 | 2.00 |
| GPDM_HUMAN (P43304) Glycerol-3-phosphate dehydrogenase, mitochondrial precursor (EC 1.1.99.5) (GPD-M) (GPDH-M) (mtGPD) [MASS=80833]                                                | Mean  | 1.31 | 1.39 | 1.56 |
|                                                                                                                                                                                    | SEM   | 0.25 | 0.11 | 0.51 |
|                                                                                                                                                                                    | Count | 2.00 | 2.00 | 2.00 |
| GPM6A_HUMAN (P51674) Neuronal membrane glycoprotein M6-a (M6a) [MASS=31209]                                                                                                        | Mean  | 0.51 | 0.73 | 0.82 |
|                                                                                                                                                                                    | SEM   | 0.08 | 0.25 | 0.07 |
|                                                                                                                                                                                    | Count | 3.00 | 2.00 | 2.00 |
| HBB_HUMAN (P68871) Hemoglobin subunit beta (Hemoglobin beta chain) (Beta-globin) [MASS=15867]                                                                                      | Mean  | 0.55 | 0.84 | 1.03 |
|                                                                                                                                                                                    | SEM   | 0.02 | 0.01 | 0.12 |
|                                                                                                                                                                                    | Count | 3.00 | 2.00 | 3.00 |
| HXK1_HUMAN (P19367) Hexokinase-1 (EC 2.7.1.1) (Hexokinase type I) (HK I) (Brain form hexokinase) [MASS=102484]                                                                     | Mean  | 1.24 | 1.61 | 1.33 |
|                                                                                                                                                                                    | SEM   | 0.04 | 0.11 | 0.09 |
|                                                                                                                                                                                    | Count | 3.00 | 3.00 | 3.00 |
| IDH3A_HUMAN (P50213) Isocitrate dehydrogenase [NAD] subunit alpha, mitochondrial precursor (EC 1.1.1.41) (Isocitric dehydrogenase) (NAD(+)-specific ICDH) [MASS=39591]             | Mean  | 1.27 | 1.26 | 1.37 |
|                                                                                                                                                                                    | SEM   | 0.13 | 0.18 | 0.02 |
|                                                                                                                                                                                    | Count | 3.00 | 3.00 | 3.00 |
| IDH3G_HUMAN (P51553) Isocitrate dehydrogenase [NAD] subunit gamma, mitochondrial precursor (EC 1.1.1.41) (Isocitric dehydrogenase) (NAD(+)-specific ICDH) [MASS=42794]             | Mean  | 1.40 | 1.52 | 0.96 |
|                                                                                                                                                                                    | SEM   | 0.08 | 0.01 | 0.02 |
|                                                                                                                                                                                    | Count | 3.00 | 2.00 | 2.00 |
| IDHP_HUMAN (P48735) Isocitrate dehydrogenase [NADP], mitochondrial precursor (EC 1.1.1.42) (Oxalosuccinate decarboxylase) (IDH) (NADP(+)-specific ICDH) (IDP) (ICD-M) [MASS=50909] | Mean  | 1.22 | 1.44 | 1.08 |
|                                                                                                                                                                                    | SEM   | 0.06 | 0.07 | 0.11 |
|                                                                                                                                                                                    | Count | 3.00 | 3.00 | 3.00 |



|                                                                                                                                                                                                    |       |      |      |      |
|----------------------------------------------------------------------------------------------------------------------------------------------------------------------------------------------------|-------|------|------|------|
| KCC2A_HUMAN (Q9UQM7) Calcium/calmodulin-dependent protein kinase type II alpha chain (EC 2.7.11.17) (CaM-kinase II alpha chain) (CaM kinase II alpha subunit) (CaMK-II subunit alpha) [MASS=54029] | Mean  | 0.67 | 0.86 | 1.15 |
|                                                                                                                                                                                                    | SEM   | 0.02 | 0.04 | 0.09 |
|                                                                                                                                                                                                    | Count | 3.00 | 2.00 | 3.00 |
| KCC2B_HUMAN (Q13554) Calcium/calmodulin-dependent protein kinase type II beta chain (EC 2.7.11.17) (CaM-kinase II beta chain) (CaM kinase II subunit beta) (CaMK-II subunit beta) [MASS=72726]     | Mean  | 0.81 | 0.91 | 1.15 |
|                                                                                                                                                                                                    | SEM   | 0.05 | 0.06 | 0.16 |
|                                                                                                                                                                                                    | Count | 3.00 | 3.00 | 3.00 |
| KCRB_HUMAN (P12277) Creatine kinase B-type (EC 2.7.3.2) (Creatine kinase B chain) (B-CK) [MASS=42644]                                                                                              | Mean  | 0.73 | 0.75 | 1.36 |
|                                                                                                                                                                                                    | SEM   | 0.01 | 0.01 | 0.10 |
|                                                                                                                                                                                                    | Count | 3.00 | 3.00 | 3.00 |
| KCRU_HUMAN (P12532) Creatine kinase, ubiquitous mitochondrial precursor (EC 2.7.3.2) (U-MtCK) (Mia-CK) (Acidic-type mitochondrial creatine kinase) [MASS=47036]                                    | Mean  | 1.20 | 1.51 | 1.27 |
|                                                                                                                                                                                                    | SEM   | 0.01 | 0.20 | 0.05 |
|                                                                                                                                                                                                    | Count | 3.00 | 3.00 | 3.00 |
| KPYM_HUMAN (P14618) Pyruvate kinase isozymes M1/M2 (EC 2.7.1.40) (Pyruvate kinase muscle isozyme) (Cytosolic thyroid hormone-binding protein) (CTHBP) (THBP1) [MASS=57805]                         | Mean  | 0.78 | 0.67 | 0.95 |
|                                                                                                                                                                                                    | SEM   | 0.19 | 0.05 | 0.03 |
|                                                                                                                                                                                                    | Count | 3.00 | 3.00 | 3.00 |
| LETM1_HUMAN (O95202) Leucine zipper-EF-hand-containing transmembrane protein 1, mitochondrial precursor [MASS=83354]                                                                               | Mean  | 0.94 | 1.37 | 1.30 |
|                                                                                                                                                                                                    | SEM   | 0.11 | 0.04 | 0.14 |
|                                                                                                                                                                                                    | Count | 2.00 | 2.00 | 2.00 |
| MAON_HUMAN (Q16798) NADP-dependent malic enzyme, mitochondrial precursor (EC 1.1.1.40) (NADP-ME) (Malic enzyme 3) [MASS=67054]                                                                     | Mean  | 1.70 | 1.52 | 1.06 |
|                                                                                                                                                                                                    | SEM   | 0.50 | 0.19 | 0.09 |
|                                                                                                                                                                                                    | Count | 3.00 | 2.00 | 3.00 |
| MDHM_HUMAN (P40926) Malate dehydrogenase, mitochondrial precursor (EC 1.1.1.37) [MASS=35531]                                                                                                       | Mean  | 1.25 | 1.79 | 1.35 |
|                                                                                                                                                                                                    | SEM   | 0.08 | 0.09 | 0.02 |
|                                                                                                                                                                                                    | Count | 3.00 | 3.00 | 3.00 |

|                                                                                                                                                                                                                                          |       |      |      |      |
|------------------------------------------------------------------------------------------------------------------------------------------------------------------------------------------------------------------------------------------|-------|------|------|------|
| MGST3_HUMAN (O14880) Microsomal glutathione S-transferase 3 (EC 2.5.1.18)<br>(Microsomal GST-3) (Microsomal GST-III) [MASS=16516]                                                                                                        | Mean  | 1.07 | 1.71 | 1.32 |
|                                                                                                                                                                                                                                          | SEM   | 0.10 | 0.08 | 0.08 |
|                                                                                                                                                                                                                                          | Count | 3.00 | 3.00 | 3.00 |
| MMSA_HUMAN (Q02252) Methylmalonate-semialdehyde dehydrogenase [acylating],<br>mitochondrial precursor (EC 1.2.1.27) (MMSDH) (Malonate-semialdehyde dehydrogenase<br>[acylating]) (EC 1.2.1.18) [MASS=57839]                              | Mean  | 1.25 | 1.41 | 1.58 |
|                                                                                                                                                                                                                                          | SEM   | 0.27 | 0.15 | 0.18 |
|                                                                                                                                                                                                                                          | Count | 2.00 | 2.00 | 2.00 |
| MOG_HUMAN (Q16653) Myelin-oligodendrocyte glycoprotein precursor [MASS=28179]                                                                                                                                                            | Mean  | 1.38 | 0.89 | 1.22 |
|                                                                                                                                                                                                                                          | SEM   | 0.55 | 0.05 | 0.30 |
|                                                                                                                                                                                                                                          | Count | 2.00 | 2.00 | 2.00 |
| MTCH2_HUMAN (Q9Y6C9) Mitochondrial carrier homolog 2 (Met-induced mitochondrial<br>protein) [MASS=33331]                                                                                                                                 | Mean  | 1.03 | 1.43 | 0.98 |
|                                                                                                                                                                                                                                          | SEM   | 0.23 | 0.15 | 0.06 |
|                                                                                                                                                                                                                                          | Count | 2.00 | 2.00 | 3.00 |
| MYPR_HUMAN (P60201) Myelin proteolipid protein (PLP) (Lipophilin) [MASS=29946]                                                                                                                                                           | Mean  | 1.42 | 1.49 | 1.06 |
|                                                                                                                                                                                                                                          | SEM   | 0.08 | 0.14 | 0.10 |
|                                                                                                                                                                                                                                          | Count | 3.00 | 3.00 | 3.00 |
| NCA11_HUMAN (P13591) Neural cell adhesion molecule 1, 140 kDa isoform precursor (N-<br>CAM 140) (NCAM-140) (CD56 antigen) [MASS=93360]                                                                                                   | Mean  | 0.41 | 0.45 | 1.01 |
|                                                                                                                                                                                                                                          | SEM   | 0.05 | 0.02 | 0.08 |
|                                                                                                                                                                                                                                          | Count | 3.00 | 2.00 | 3.00 |
| NDUA5_HUMAN (Q16718) NADH dehydrogenase [ubiquinone] 1 alpha subcomplex<br>subunit 5 (EC 1.6.5.3) (EC 1.6.99.3) (NADH-ubiquinone oxidoreductase 13 kDa-B subunit)<br>(Complex I-13Kd-B) (CI-13Kd-B) (Complex I subunit B13) [MASS=13327] | Mean  | 1.80 | 1.47 | 1.05 |
|                                                                                                                                                                                                                                          | SEM   | 0.05 | 0.16 | 0.20 |
|                                                                                                                                                                                                                                          | Count | 2.00 | 2.00 | 3.00 |
| NDUAA_HUMAN (O95299) NADH dehydrogenase [ubiquinone] 1 alpha subcomplex<br>subunit 10, mitochondrial precursor (EC 1.6.5.3) (EC 1.6.99.3) (NADH-ubiquinone<br>oxidoreductase 42 kDa subunit) (Complex I-42KD) (CI-42KD) [MASS=40750]     | Mean  | 1.37 | 1.40 | 1.27 |
|                                                                                                                                                                                                                                          | SEM   | 0.10 | 0.15 | 0.21 |
|                                                                                                                                                                                                                                          | Count | 3.00 | 3.00 | 3.00 |

|                                                                                                                                                                                                                             |       |      |      |      |
|-----------------------------------------------------------------------------------------------------------------------------------------------------------------------------------------------------------------------------|-------|------|------|------|
| NDUB7_HUMAN (P17568) NADH dehydrogenase [ubiquinone] 1 beta subcomplex subunit 7 (EC 1.6.5.3) (EC 1.6.99.3) (NADH-ubiquinone oxidoreductase B18 subunit) (Complex I-B18) (CI-B18) (Cell adhesion protein SQM1) [MASS=16271] | Mean  | 1.09 | 1.64 | 1.25 |
|                                                                                                                                                                                                                             | SEM   | 0.08 | 0.08 | 0.06 |
|                                                                                                                                                                                                                             | Count | 3.00 | 2.00 | 3.00 |
| NNTM_HUMAN (Q13423) NAD(P) transhydrogenase, mitochondrial precursor (EC 1.6.1.2) (Pyridine nucleotide transhydrogenase) (Nicotinamide nucleotide transhydrogenase) [MASS=113895]                                           | Mean  | 1.02 | 1.20 | 0.98 |
|                                                                                                                                                                                                                             | SEM   | 0.10 | 0.22 | 0.07 |
|                                                                                                                                                                                                                             | Count | 3.00 | 2.00 | 3.00 |
| NSF_HUMAN (P46459) Vesicle-fusing ATPase (EC 3.6.4.6) (Vesicular-fusion protein NSF) (N-ethylmaleimide sensitive fusion protein) (NEM-sensitive fusion protein) [MASS=82654]                                                | Mean  | 0.54 | 0.88 | 1.09 |
|                                                                                                                                                                                                                             | SEM   | 0.09 | 0.02 | 0.04 |
|                                                                                                                                                                                                                             | Count | 3.00 | 2.00 | 3.00 |
| NUAM_HUMAN (P28331) NADH-ubiquinone oxidoreductase 75 kDa subunit, mitochondrial precursor (EC 1.6.5.3) (EC 1.6.99.3) (Complex I-75Kd) (CI-75Kd) [MASS=79467]                                                               | Mean  | 1.30 | 1.45 | 1.25 |
|                                                                                                                                                                                                                             | SEM   | 0.08 | 0.15 | 0.05 |
|                                                                                                                                                                                                                             | Count | 3.00 | 3.00 | 3.00 |
| NUBM_HUMAN (P49821) NADH-ubiquinone oxidoreductase 51 kDa subunit, mitochondrial precursor (EC 1.6.5.3) (EC 1.6.99.3) (Complex I-51KD) (CI-51KD) (NADH dehydrogenase flavoprotein 1) [MASS=50817]                           | Mean  | 1.23 | 1.45 | 1.33 |
|                                                                                                                                                                                                                             | SEM   | 0.27 | 0.14 | 0.23 |
|                                                                                                                                                                                                                             | Count | 3.00 | 3.00 | 3.00 |
| NUIM_HUMAN (O00217) NADH-ubiquinone oxidoreductase 23 kDa subunit, mitochondrial precursor (EC 1.6.5.3) (EC 1.6.99.3) (Complex I-23KD) (CI-23KD) (TYKY subunit) [MASS=23705]                                                | Mean  | 1.49 | 2.39 | 1.19 |
|                                                                                                                                                                                                                             | SEM   | 0.22 | 0.34 | 0.26 |
|                                                                                                                                                                                                                             | Count | 2.00 | 2.00 | 2.00 |
| NUMM_HUMAN (O75380) NADH-ubiquinone oxidoreductase 13 kDa-A subunit, mitochondrial precursor (EC 1.6.5.3) (EC 1.6.99.3) (Complex I-13KD-A) (CI-13KD-A) [MASS=13712]                                                         | Mean  | 1.14 | 1.45 | 1.25 |
|                                                                                                                                                                                                                             | SEM   | 0.17 | 0.08 | 0.15 |
|                                                                                                                                                                                                                             | Count | 3.00 | 3.00 | 3.00 |

|                                                                                                                                                                                                                                                                |       |      |      |      |
|----------------------------------------------------------------------------------------------------------------------------------------------------------------------------------------------------------------------------------------------------------------|-------|------|------|------|
| ODP2_HUMAN (P10515) Dihydrolipoyllysine-residue acetyltransferase component of pyruvate dehydrogenase complex, mitochondrial precursor (EC 2.3.1.12) (Pyruvate dehydrogenase complex E2 subunit) (PDCE2) (E2) (Dihydrolipoamide S-acetyltransferase component) | Mean  | 1.37 | 1.33 | 1.04 |
|                                                                                                                                                                                                                                                                | SEM   | 0.19 | 0.14 | 0.07 |
|                                                                                                                                                                                                                                                                | Count | 3.00 | 3.00 | 3.00 |
| ODPA_HUMAN (P08559) Pyruvate dehydrogenase E1 component alpha subunit, somatic form, mitochondrial precursor (EC 1.2.4.1) (PDHE1-A type I) [MASS=43295]                                                                                                        | Mean  | 1.36 | 1.59 | 0.88 |
|                                                                                                                                                                                                                                                                | SEM   | 0.25 | 0.10 | 0.00 |
|                                                                                                                                                                                                                                                                | Count | 2.00 | 3.00 | 2.00 |
| OPA1_HUMAN (O60313) Dynamin-like 120 kDa protein, mitochondrial precursor (Optic atrophy 1 gene protein) [MASS=111657]                                                                                                                                         | Mean  | 1.14 | 1.35 | 1.21 |
|                                                                                                                                                                                                                                                                | SEM   | 0.09 | 0.18 | 0.01 |
|                                                                                                                                                                                                                                                                | Count | 3.00 | 3.00 | 2.00 |
| PARK7_HUMAN (Q99497) Protein DJ-1 (Oncogene DJ1) [MASS=19891]                                                                                                                                                                                                  | Mean  | 0.70 | 0.94 | 0.99 |
|                                                                                                                                                                                                                                                                | SEM   | 0.05 | 0.02 | 0.06 |
|                                                                                                                                                                                                                                                                | Count | 3.00 | 2.00 | 3.00 |
| PPIA_HUMAN (P62937) Peptidyl-prolyl cis-trans isomerase A (EC 5.2.1.8) (PPIase A) (Rotamase A) (Cyclophilin A) (Cyclosporin A-binding protein) [MASS=17881]                                                                                                    | Mean  | 0.83 | 0.87 | 1.19 |
|                                                                                                                                                                                                                                                                | SEM   | 0.14 | 0.15 | 0.19 |
|                                                                                                                                                                                                                                                                | Count | 2.00 | 2.00 | 3.00 |
| RHOA_HUMAN (P61586) Transforming protein RhoA precursor (H12) [MASS=21768]                                                                                                                                                                                     | Mean  | 1.09 | 0.77 | 1.04 |
|                                                                                                                                                                                                                                                                | SEM   | 0.38 | 0.02 | 0.09 |
|                                                                                                                                                                                                                                                                | Count | 3.00 | 2.00 | 3.00 |
| RHOB_HUMAN (P62745) Rho-related GTP-binding protein RhoB precursor (H6) [MASS=22123]                                                                                                                                                                           | Mean  | 0.49 | 0.65 | 0.99 |
|                                                                                                                                                                                                                                                                | SEM   | 0.22 | 0.03 | 0.03 |
|                                                                                                                                                                                                                                                                | Count | 2.00 | 3.00 | 3.00 |
| SAM50_HUMAN (Q9Y512) Sorting and assembly machinery component 50 homolog [MASS=51962]                                                                                                                                                                          | Mean  | 0.97 | 1.77 | 1.22 |
|                                                                                                                                                                                                                                                                | SEM   | 0.10 | 0.22 | 0.04 |
|                                                                                                                                                                                                                                                                | Count | 2.00 | 2.00 | 3.00 |
| SAP_HUMAN (P07602) Proactivator polypeptide precursor [Contains: Saposin A (Protein A); Saposin B-Val; Saposin B (Sphingolipid activator protein 1) (SAP-1) (Cerebroside sulfate activator) (CSAct) (Dispersin) (Sulfatide/GM1 activator); Saposin C (Co-beta- | Mean  | 2.36 | 1.67 | 1.10 |

|                                                                                                                                                                                                                                                                |       |      |      |      |
|----------------------------------------------------------------------------------------------------------------------------------------------------------------------------------------------------------------------------------------------------------------|-------|------|------|------|
|                                                                                                                                                                                                                                                                | SEM   | 0.07 | 0.36 | 0.02 |
|                                                                                                                                                                                                                                                                | Count | 3.00 | 3.00 | 3.00 |
| SCOT_HUMAN (P55809) Succinyl-CoA:3-ketoacid-coenzyme A transferase 1, mitochondrial precursor (EC 2.8.3.5) (Somatic-type succinyl CoA:3-oxoacid CoA-transferase) (Scot-S) [MASS=56157]                                                                         | Mean  | 1.28 | 1.66 | 1.36 |
|                                                                                                                                                                                                                                                                | SEM   | 0.10 | 0.20 | 0.19 |
|                                                                                                                                                                                                                                                                | Count | 3.00 | 3.00 | 3.00 |
| SEPT7_HUMAN (Q16181) Septin-7 (CDC10 protein homolog) [MASS=50680]                                                                                                                                                                                             | Mean  | 0.71 | 1.00 | 0.94 |
|                                                                                                                                                                                                                                                                | SEM   | 0.04 | 0.06 | 0.00 |
|                                                                                                                                                                                                                                                                | Count | 3.00 | 2.00 | 2.00 |
| SHPS1_HUMAN (P78324) Tyrosine-protein phosphatase non-receptor type substrate 1 precursor (SHP substrate 1) (SHPS-1) (Inhibitory receptor SHPS-1) (Signal-regulatory protein alpha-1) (Sirp-alpha-1) (Sirp-alpha-2) (Sirp-alpha-3) (MyD-1 antigen) (Brain Ig-I | Mean  | 0.36 | 0.44 | 1.01 |
|                                                                                                                                                                                                                                                                | SEM   | 0.05 | 0.05 | 0.10 |
|                                                                                                                                                                                                                                                                | Count | 3.00 | 3.00 | 3.00 |
| SIRB1_HUMAN (O00241) Signal-regulatory protein beta-1 precursor (SIRP-beta-1) (CD172b antigen) [MASS=43255]                                                                                                                                                    | Mean  | 0.29 | 0.42 | 1.16 |
|                                                                                                                                                                                                                                                                | SEM   | 0.04 | 0.08 | 0.08 |
|                                                                                                                                                                                                                                                                | Count | 3.00 | 2.00 | 2.00 |
| SIRT2_HUMAN (Q8IXJ6) NAD-dependent deacetylase sirtuin-2 (EC 3.5.1.-) (SIR2-like) (SIR2-like protein 2) [MASS=43182]                                                                                                                                           | Mean  | 0.84 | 1.26 | 0.97 |
|                                                                                                                                                                                                                                                                | SEM   | 0.34 | 0.41 | 0.04 |
|                                                                                                                                                                                                                                                                | Count | 2.00 | 2.00 | 2.00 |
| SSDH_HUMAN (P51649) Succinate semialdehyde dehydrogenase, mitochondrial precursor (EC 1.2.1.24) (NAD(+)-dependent succinic semialdehyde dehydrogenase) [MASS=57214]                                                                                            | Mean  | 1.74 | 1.55 | 1.30 |
|                                                                                                                                                                                                                                                                | SEM   | 0.28 | 0.05 | 0.20 |
|                                                                                                                                                                                                                                                                | Count | 2.00 | 2.00 | 3.00 |
| STXB1_HUMAN (P61764) Syntaxin-binding protein 1 (Unc-18 homolog) (Unc-18A) (Unc-18-1) (N-Sec1) (p67) [MASS=67568]                                                                                                                                              | Mean  | 0.58 | 0.63 | 1.08 |
|                                                                                                                                                                                                                                                                | SEM   | 0.04 | 0.02 | 0.12 |
|                                                                                                                                                                                                                                                                | Count | 3.00 | 3.00 | 3.00 |
| SUCB1_HUMAN (Q9P2R7) Succinyl-CoA ligase [ADP-forming] beta-chain, mitochondrial precursor (EC 6.2.1.5) (Succinyl-CoA synthetase, betaA chain) (SCS-betaA) (ATP-specific succinyl-CoA synthetase subunit beta) (NY-REN-39 antigen) [MASS=50317]                | Mean  | 4.36 | 1.51 | 1.17 |

|                                                                                                                                                                                                        |       |      |      |      |
|--------------------------------------------------------------------------------------------------------------------------------------------------------------------------------------------------------|-------|------|------|------|
|                                                                                                                                                                                                        | SEM   | 1.24 | 0.07 | 0.14 |
|                                                                                                                                                                                                        | Count | 2.00 | 2.00 | 2.00 |
| SYIM_HUMAN (Q9NSE4) Isoleucyl-tRNA synthetase, mitochondrial precursor (EC 6.1.1.5) (Isoleucine--tRNA ligase) (IleRS) [MASS=113791]                                                                    | Mean  | 1.63 | 2.36 | 1.08 |
|                                                                                                                                                                                                        | SEM   | 0.23 | 0.96 | 0.33 |
|                                                                                                                                                                                                        | Count | 2.00 | 2.00 | 3.00 |
| SYPH_HUMAN (P08247) Synaptophysin (Major synaptic vesicle protein p38) [MASS=33845]                                                                                                                    | Mean  | 0.50 | 0.62 | 0.94 |
|                                                                                                                                                                                                        | SEM   | 0.04 | 0.04 | 0.09 |
|                                                                                                                                                                                                        | Count | 3.00 | 3.00 | 3.00 |
| TBA1_HUMAN (P68366) Tubulin alpha-1 chain (Alpha-tubulin 1) (Testis-specific alpha-tubulin) (Tubulin H2-alpha) [MASS=49924]                                                                            | Mean  | 0.75 | 0.94 | 1.07 |
|                                                                                                                                                                                                        | SEM   | 0.04 | 0.01 | 0.03 |
|                                                                                                                                                                                                        | Count | 3.00 | 3.00 | 3.00 |
| TBB2_HUMAN (P07437) Tubulin beta-2 chain [MASS=49671]                                                                                                                                                  | Mean  | 0.77 | 0.93 | 1.10 |
|                                                                                                                                                                                                        | SEM   | 0.07 | 0.07 | 0.11 |
|                                                                                                                                                                                                        | Count | 3.00 | 3.00 | 3.00 |
| THIL_HUMAN (P24752) Acetyl-CoA acetyltransferase, mitochondrial precursor (EC 2.3.1.9) (Acetoacetyl-CoA thiolase) (T2) [MASS=45199]                                                                    | Mean  | 1.44 | 1.67 | 3.31 |
|                                                                                                                                                                                                        | SEM   | 0.14 | 0.27 | 1.11 |
|                                                                                                                                                                                                        | Count | 3.00 | 3.00 | 3.00 |
| THY1_HUMAN (P04216) Thy-1 membrane glycoprotein precursor (Thy-1 antigen) (CD90 antigen) (CDw90 antigen) [MASS=17935]                                                                                  | Mean  | 0.45 | 0.55 | 0.88 |
|                                                                                                                                                                                                        | SEM   | 0.03 | 0.00 | 0.16 |
|                                                                                                                                                                                                        | Count | 3.00 | 2.00 | 3.00 |
| TIM9_HUMAN (Q9Y5J7) Mitochondrial import inner membrane translocase subunit Tim9 [MASS=10378]                                                                                                          | Mean  | 1.40 | 1.51 | 0.90 |
|                                                                                                                                                                                                        | SEM   | 0.12 | 0.18 | 0.24 |
|                                                                                                                                                                                                        | Count | 3.00 | 2.00 | 3.00 |
| TOM70_HUMAN (O94826) Mitochondrial precursor proteins import receptor (Translocase of outer membrane TOM70) [MASS=67454]                                                                               | Mean  | 0.81 | 1.39 | 0.97 |
|                                                                                                                                                                                                        | SEM   | 0.12 | 0.16 | 0.22 |
|                                                                                                                                                                                                        | Count | 2.00 | 3.00 | 3.00 |
| UCHL1_HUMAN (P09936) Ubiquitin carboxyl-terminal hydrolase isozyme L1 (EC 3.4.19.12) (EC 6.-.-.) (UCH-L1) (Ubiquitin thioesterase L1) (Neuron cytoplasmic protein 9.5) (PGP 9.5) (PGP9.5) [MASS=24824] | Mean  | 0.74 | 0.78 | 1.55 |
|                                                                                                                                                                                                        | SEM   | 0.15 | 0.07 | 0.60 |

|                                                                                                                                                                                                                                  |       |      |      |      |
|----------------------------------------------------------------------------------------------------------------------------------------------------------------------------------------------------------------------------------|-------|------|------|------|
|                                                                                                                                                                                                                                  | Count | 3.00 | 2.00 | 3.00 |
| UCRH_HUMAN (P07919) Ubiquinol-cytochrome c reductase complex 11 kDa protein, mitochondrial precursor (EC 1.10.2.2) (Mitochondrial hinge protein) (Cytochrome C1, nonheme 11 kDa protein) (Complex III subunit VIII) [MASS=10739] | Mean  | 1.29 | 1.69 | 1.09 |
|                                                                                                                                                                                                                                  | SEM   | 0.14 | 0.06 | 0.07 |
|                                                                                                                                                                                                                                  | Count | 3.00 | 2.00 | 3.00 |
| UQCR1_HUMAN (P31930) Ubiquinol-cytochrome-c reductase complex core protein I, mitochondrial precursor (EC 1.10.2.2) [MASS=52645]                                                                                                 | Mean  | 1.25 | 1.76 | 1.13 |
|                                                                                                                                                                                                                                  | SEM   | 0.12 | 0.20 | 0.11 |
|                                                                                                                                                                                                                                  | Count | 3.00 | 3.00 | 3.00 |
| UQCR2_HUMAN (P22695) Ubiquinol-cytochrome-c reductase complex core protein 2, mitochondrial precursor (EC 1.10.2.2) (Complex III subunit II) [MASS=48443]                                                                        | Mean  | 1.22 | 1.43 | 1.07 |
|                                                                                                                                                                                                                                  | SEM   | 0.06 | 0.31 | 0.12 |
|                                                                                                                                                                                                                                  | Count | 3.00 | 3.00 | 3.00 |
| VDAC1_HUMAN (P21796) Voltage-dependent anion-selective channel protein 1 (VDAC-1) (hVDAC1) (Outer mitochondrial membrane protein porin 1) (Plasmalemmal porin) (Porin 31HL) (Porin 31HM) [MASS=30641]                            | Mean  | 1.12 | 1.87 | 1.43 |
|                                                                                                                                                                                                                                  | SEM   | 0.07 | 0.19 | 0.37 |
|                                                                                                                                                                                                                                  | Count | 3.00 | 3.00 | 3.00 |
| VDAC2_HUMAN (P45880) Voltage-dependent anion-selective channel protein 2 (VDAC-2) (hVDAC2) (Outer mitochondrial membrane protein porin 2) [MASS=38092]                                                                           | Mean  | 1.10 | 1.64 | 1.31 |
|                                                                                                                                                                                                                                  | SEM   | 0.04 | 0.14 | 0.19 |
|                                                                                                                                                                                                                                  | Count | 3.00 | 3.00 | 3.00 |
| VDAC3_HUMAN (Q9Y277) Voltage-dependent anion-selective channel protein 3 (VDAC-3) (hVDAC3) (Outer mitochondrial membrane protein porin 3) [MASS=30658]                                                                           | Mean  | 1.19 | 1.60 | 2.38 |
|                                                                                                                                                                                                                                  | SEM   | 0.07 | 0.09 | 1.11 |
|                                                                                                                                                                                                                                  | Count | 3.00 | 2.00 | 3.00 |
| VISL1_HUMAN (P62760) Visinin-like protein 1 (VILIP) (Hippocalcin-like protein 3) (HLP3) [MASS=22011]                                                                                                                             | Mean  | 0.77 | 1.09 | 1.13 |
|                                                                                                                                                                                                                                  | SEM   | 0.03 | 0.04 | 0.01 |
|                                                                                                                                                                                                                                  | Count | 3.00 | 2.00 | 2.00 |

**Table 2. MCI mitochondrial samples  
Protein Summary**

| Description                                                                                                                                                                                                                                   | Experiment1   |                  | Experiment2   |                  | Experiment3   |                  | Count | Mean | SEM  |
|-----------------------------------------------------------------------------------------------------------------------------------------------------------------------------------------------------------------------------------------------|---------------|------------------|---------------|------------------|---------------|------------------|-------|------|------|
|                                                                                                                                                                                                                                               | Protein Score | XPress H2L Ratio | Protein Score | XPress H2L Ratio | Protein Score | XPress H2L Ratio |       |      |      |
| 1433F_HUMAN (Q04917) 14-3-3 protein eta (Protein AS1) [MASS=28087]                                                                                                                                                                            | 0.61          | 0.85             | 0.80          | 0.91             | 1.00          | 0.91             | 3     | 0.89 | 0.02 |
| 1433G_HUMAN (P61981) 14-3-3 protein gamma (Protein kinase C inhibitor protein 1) (KCIP-1) [MASS=28171]                                                                                                                                        | 1.00          | 0.76             | 1.00          | 0.90             | 0.95          | 1.24             | 3     | 0.97 | 0.14 |
| 1433Z_HUMAN (P63104) 14-3-3 protein zeta/delta (Protein kinase C inhibitor protein 1) (KCIP-1) [MASS=27745]                                                                                                                                   | 1.00          | 0.75             | 1.00          | 0.61             | 1.00          | 0.69             | 3     | 0.68 | 0.04 |
| 2AAA_HUMAN (P30153) Serine/threonine-protein phosphatase 2A 65 kDa regulatory subunit A alpha isoform (PP2A, subunit A, PR65-alpha isoform) (PP2A, subunit A, R1-alpha isoform) (Medium tumor antigen-associated 61 kDa protein) [MASS=65092] | 1.00          | 0.91             | 0.97          | 0.58             | 1.00          | 1.48             | 3     | 0.99 | 0.26 |
| AATM_HUMAN (P00505) Aspartate aminotransferase, mitochondrial precursor (EC 2.6.1.1) (Transaminase A) (Glutamate oxaloacetate transaminase 2) [MASS=47475]                                                                                    | 1.00          | 1.32             | 1.00          | 1.41             | 1.00          | 1.57             | 3     | 1.43 | 0.07 |
| ACON_HUMAN (Q99798) Aconitate hydratase, mitochondrial precursor (EC 4.2.1.3) (Citrate hydro-lyase) (Aconitase) [MASS=85425]                                                                                                                  | 1.00          | 1.28             | 1.00          | 1.29             | 1.00          | 1.14             | 3     | 1.24 | 0.05 |
| ACOT9_HUMAN (Q9Y305) Acyl-coenzyme A thioesterase 9 (EC 3.1.2.) (Acyl-CoA thioesterase 9) (Acyl-CoA thioester hydrolase 9) [MASS=46354]                                                                                                       | 1.00          | 1.41             | 0.00          | 1.13             | 0.51          | 1.22             | 3     | 1.25 | 0.08 |
| ACTB_HUMAN (P60709) Actin, cytoplasmic 1 (Beta-actin) [MASS=41736]                                                                                                                                                                            | 1.00          | 0.57             | 1.00          | 0.55             | 1.00          | 0.73             | 3     | 0.62 | 0.06 |
| ADT1_HUMAN (P12235) ADP/ATP translocase 1 (Adenine nucleotide translocator 1) (ANT 1) (ADP,ATP carrier protein 1) (Solute carrier family 25 member 4) (ADP,ATP carrier protein, heart/skeletal muscle isoform T1) [MASS=32933]                | 1.00          | 1.04             | 1.00          | 1.21             | 1.00          | 1.40             | 3     | 1.22 | 0.10 |
| ALBU_HUMAN (P02768) Serum albumin precursor [MASS=69366]                                                                                                                                                                                      | 1.00          | 0.62             | 1.00          | 0.63             | 1.00          | 0.69             | 3     | 0.65 | 0.02 |
| ALDH2_HUMAN (P05091) Aldehyde dehydrogenase, mitochondrial precursor (EC 1.2.1.3) (ALDH class 2) (ALDHI) (ALDH-E2) [MASS=56381]                                                                                                               | 1.00          | 1.74             | 1.00          | 2.83             | 1.00          | 1.77             | 3     | 2.11 | 0.36 |



|                                                                                                                                                                                                                                                                              |      |      |      |      |      |      |          |             |             |
|------------------------------------------------------------------------------------------------------------------------------------------------------------------------------------------------------------------------------------------------------------------------------|------|------|------|------|------|------|----------|-------------|-------------|
| ANK2_HUMAN (Q01484) Ankyrin-2 (Brain ankyrin) (Ankyrin-B) (Ankyrin, nonerythroid) [MASS=430341]                                                                                                                                                                              | 0.99 | 0.94 | 1.00 | 1.10 | 0.90 | 0.71 | <b>3</b> | <b>0.92</b> | <b>0.11</b> |
| ANXA2_HUMAN (P07355) Annexin A2 (Annexin II) (Lipocortin II) (Calpactin I heavy chain) (Chromobindin-8) (p36) (Protein I) (Placental anticoagulant protein IV) (PAP-IV) [MASS=38473]                                                                                         | 0.92 | 1.68 | 0.98 | 1.26 | 1.00 | 1.25 | <b>3</b> | <b>1.40</b> | <b>0.14</b> |
| ANXA6_HUMAN (P08133) Annexin A6 (Annexin VI) (Lipocortin VI) (P68) (P70) (Protein III) (Chromobindin-20) (67 kDa calelectrin) (Calphobindin-II) (CPB-II) [MASS=75742]                                                                                                        | 1.00 | 0.54 | 1.00 | 0.72 | 1.00 | 0.75 | <b>3</b> | <b>0.67</b> | <b>0.07</b> |
| AT1A1_HUMAN (P05023) Sodium/potassium-transporting ATPase alpha-1 chain precursor (EC 3.6.3.9) (Sodium pump 1) (Na+/K+ ATPase 1) [MASS=112895]                                                                                                                               | 1.00 | 0.41 | 1.00 | 0.44 | 1.00 | 0.47 | <b>3</b> | <b>0.44</b> | <b>0.02</b> |
| AT1A3_HUMAN (P13637) Sodium/potassium-transporting ATPase alpha-3 chain (EC 3.6.3.9) (Sodium pump 3) (Na+/K+ ATPase 3) (Alpha(III)) [MASS=111734]                                                                                                                            | 1.00 | 0.50 | 1.00 | 0.45 | 1.00 | 0.52 | <b>3</b> | <b>0.49</b> | <b>0.02</b> |
| AT1B1_HUMAN (P05026) Sodium/potassium-transporting ATPase subunit beta-1 (Sodium/potassium-dependent ATPase beta-1 subunit) [MASS=35061]                                                                                                                                     | 1.00 | 0.47 | 1.00 | 0.47 | 1.00 | 0.43 | <b>3</b> | <b>0.46</b> | <b>0.01</b> |
| AT2A2_HUMAN (P16615) Sarcoplasmic/endoplasmic reticulum calcium ATPase 2 (EC 3.6.3.8) (Calcium pump 2) (SERCA2) (SR Ca(2+)-ATPase 2) (Calcium-transporting ATPase sarcoplasmic reticulum type, slow twitch skeletal muscle isoform) (Endoplasmic reticulum cla [MASS=114756] | 1.00 | 0.89 | 1.00 | 1.04 | 1.00 | 0.97 | <b>3</b> | <b>0.97</b> | <b>0.04</b> |
| AT2B1_HUMAN (P20020) Plasma membrane calcium-transporting ATPase 1 (EC 3.6.3.8) (PMCA1) (Plasma membrane calcium pump isoform 1) (Plasma membrane calcium ATPase isoform 1) [MASS=138754]                                                                                    | 0.99 | 0.84 | 0.25 | 0.57 | 1.00 | 0.58 | <b>3</b> | <b>0.66</b> | <b>0.09</b> |
| AT2B2_HUMAN (Q01814) Plasma membrane calcium-transporting ATPase 2 (EC 3.6.3.8) (PMCA2) (Plasma membrane calcium pump isoform 2) (Plasma membrane calcium ATPase isoform 2) [MASS=136875]                                                                                    | 1.00 | 0.66 | 1.00 | 0.55 | 1.00 | 1.08 | <b>3</b> | <b>0.76</b> | <b>0.16</b> |
| AT2B4_HUMAN (P23634) Plasma membrane calcium-transporting ATPase 4 (EC 3.6.3.8) (PMCA4) (Plasma membrane calcium pump isoform 4) (Plasma membrane calcium ATPase isoform 4) [MASS=137919]                                                                                    | 0.99 | 0.55 | 1.00 | 0.46 | 1.00 | 0.64 | <b>3</b> | <b>0.55</b> | <b>0.05</b> |
| ATP8_HUMAN (P03928) ATP synthase protein 8 (EC 3.6.3.14) (ATPase subunit 8) (A6L) [MASS=7992]                                                                                                                                                                                | 0.89 | 1.02 | 1.00 | 1.15 | 0.59 | 1.51 | <b>3</b> | <b>1.23</b> | <b>0.15</b> |
| ATPG_HUMAN (P36542) ATP synthase gamma chain, mitochondrial precursor (EC 3.6.3.14) [MASS=32996]                                                                                                                                                                             | 1.00 | 1.19 | 1.00 | 1.38 | 1.00 | 1.43 | <b>3</b> | <b>1.33</b> | <b>0.07</b> |

|                                                                                                                                                                                                                                                                              |      |      |      |      |      |      |   |      |      |
|------------------------------------------------------------------------------------------------------------------------------------------------------------------------------------------------------------------------------------------------------------------------------|------|------|------|------|------|------|---|------|------|
| C1QBP_HUMAN (Q07021) Complement component 1 Q subcomponent-binding protein, mitochondrial precursor (Glycoprotein gC1qBP) (C1qBP) (GC1q-R protein) (Hyaluronan-binding protein 1) (Mitochondrial matrix protein p32) (p33) [MASS=31362]                                      | 0.99 | 1.11 | 1.00 | 1.44 | 1.00 | 4.06 | 3 | 2.20 | 0.93 |
| C560_HUMAN (Q99643) Succinate dehydrogenase cytochrome b560 subunit, mitochondrial precursor (Integral membrane protein CII-3) (QPs1) (QPs-1) (Succinate dehydrogenase complex subunit C) (Succinate-ubiquinone oxidoreductase cytochrome B large subunit) (CY [MASS=18610]) | 1.00 | 1.03 | 1.00 | 1.12 | 1.00 | 0.91 | 3 | 1.02 | 0.06 |
| CAC2D_HUMAN (P54289) Dihydropyridine-sensitive L-type calcium channel subunits alpha-2/delta precursor [Contains: L-type calcium channel subunit alpha-2; L-type calcium channel subunit delta] [MASS=123183]                                                                | 0.99 | 0.72 | 0.99 | 0.67 | 1.00 | 0.98 | 3 | 0.79 | 0.10 |
| CD59_HUMAN (P13987) CD59 glycoprotein precursor (Membrane attack complex inhibition factor) (MACIF) (MAC-inhibitory protein) (MAC-IP) (Protectin) (MEM43 antigen) (Membrane inhibitor of reactive lysis) (MIRL) (20 kDa homologous restriction factor) (HRF-20) [MASS=14177] | 1.00 | 0.54 | 1.00 | 0.37 | 1.00 | 0.56 | 3 | 0.49 | 0.06 |
| CD81_HUMAN (P60033) CD81 antigen (26 kDa cell surface protein TAPA-1) (Target of the antiproliferative antibody 1) (Tetraspanin-28) (Tspan-28) [MASS=25809]                                                                                                                  | 1.00 | 0.48 | 1.00 | 0.53 | 0.98 | 0.71 | 3 | 0.57 | 0.07 |
| CH60_HUMAN (P10809) 60 kDa heat shock protein, mitochondrial precursor (Hsp60) (60 kDa chaperonin) (CPN60) (Heat shock protein 60) (HSP-60) (Mitochondrial matrix protein P1) (P60 lymphocyte protein) (HuCHA60) [MASS=61054]                                                | 1.00 | 1.28 | 1.00 | 1.21 | 1.00 | 1.39 | 3 | 1.29 | 0.05 |
| CHCH3_HUMAN (Q9NX63) Coiled-coil-helix-coiled-coil-helix domain-containing protein 3 [MASS=26152]                                                                                                                                                                            | 1.00 | 1.17 | 1.00 | 1.17 | 1.00 | 1.48 | 3 | 1.27 | 0.10 |
| CISY_HUMAN (O75390) Citrate synthase, mitochondrial precursor (EC 2.3.3.1) [MASS=51712]                                                                                                                                                                                      | 0.79 | 1.32 | 1.00 | 1.54 | 1.00 | 1.51 | 3 | 1.46 | 0.07 |
| CJ070_HUMAN (Q9NZ45) Protein C10orf70 [MASS=12199]                                                                                                                                                                                                                           | 1.00 | 1.12 | 1.00 | 1.05 | 1.00 | 1.31 | 3 | 1.16 | 0.08 |
| CLH1_HUMAN (Q00610) Clathrin heavy chain 1 (CLH-17) [MASS=191482]                                                                                                                                                                                                            | 1.00 | 0.51 | 1.00 | 0.56 | 1.00 | 0.76 | 3 | 0.61 | 0.08 |
| CMC1_HUMAN (O75746) Calcium-binding mitochondrial carrier protein Aralar1 (Mitochondrial aspartate glutamate carrier 1) (Solute carrier family 25 member 12) [MASS=74755]                                                                                                    | 1.00 | 1.01 | 1.00 | 0.97 | 1.00 | 1.24 | 3 | 1.07 | 0.08 |

|                                                                                                                                                                                                        |      |      |      |      |      |      |          |             |             |
|--------------------------------------------------------------------------------------------------------------------------------------------------------------------------------------------------------|------|------|------|------|------|------|----------|-------------|-------------|
| CN37_HUMAN (P09543) 2',3'-cyclic-nucleotide 3'-phosphodiesterase (EC 3.1.4.37) (CNP) (CNPase) [MASS=47578]                                                                                             | 1.00 | 0.95 | 1.00 | 0.97 | 1.00 | 1.12 | <b>3</b> | <b>1.01</b> | <b>0.05</b> |
| CNTN1_HUMAN (Q12860) Contactin-1 precursor (Neural cell surface protein F3) (Glycoprotein gp135) [MASS=113320]                                                                                         | 1.00 | 0.53 | 1.00 | 0.48 | 0.98 | 0.42 | <b>3</b> | <b>0.48</b> | <b>0.03</b> |
| CNTP1_HUMAN (P78357) Contactin-associated protein 1 precursor (Caspr) (Caspr1) (Neurexin 4) (Neurexin IV) (p190) [MASS=156266]                                                                         | 0.77 | 0.85 | 1.00 | 0.50 | 0.00 | 0.69 | <b>3</b> | <b>0.68</b> | <b>0.10</b> |
| COF1_HUMAN (P23528) Cofilin-1 (Cofilin, non-muscle isoform) (18 kDa phosphoprotein) (p18) [MASS=18371]                                                                                                 | 1.00 | 0.51 | 1.00 | 0.56 | 1.00 | 0.75 | <b>3</b> | <b>0.61</b> | <b>0.07</b> |
| COX5B_HUMAN (P10606) Cytochrome c oxidase polypeptide Vb, mitochondrial precursor (EC 1.9.3.1) [MASS=13696]                                                                                            | 1.00 | 1.25 | 0.97 | 1.56 | 1.00 | 1.51 | <b>3</b> | <b>1.44</b> | <b>0.10</b> |
| COX7C_HUMAN (P15954) Cytochrome c oxidase polypeptide VIc, mitochondrial precursor (EC 1.9.3.1) [MASS=7245]                                                                                            | 0.99 | 0.98 | 1.00 | 1.06 | 0.94 | 1.03 | <b>3</b> | <b>1.02</b> | <b>0.02</b> |
| CRTC_HUMAN (P27797) Calreticulin precursor (CRP55) (Calregulin) (HACBP) (ERp60) (grp60) [MASS=48141]                                                                                                   | 1.00 | 1.70 | 0.99 | 1.86 | 1.00 | 2.01 | <b>3</b> | <b>1.86</b> | <b>0.09</b> |
| CRYM_HUMAN (Q14894) Mu-crystallin homolog (NADP-regulated thyroid-hormone-binding protein) [MASS=33775]                                                                                                | 0.98 | 0.61 | 0.00 | 0.75 | 1.00 | 0.60 | <b>3</b> | <b>0.65</b> | <b>0.05</b> |
| CSPG2_HUMAN (P13611) Versican core protein precursor (Large fibroblast proteoglycan) (Chondroitin sulfate proteoglycan core protein 2) (PG-M) (Glial hyaluronate-binding protein) (GHAP) [MASS=372817] | 1.00 | 0.48 | 1.00 | 0.62 | 1.00 | 0.45 | <b>3</b> | <b>0.52</b> | <b>0.05</b> |
| CSPG3_HUMAN (O14594) Neurocan core protein precursor (Chondroitin sulfate proteoglycan 3) [MASS=142972]                                                                                                | 1.00 | 0.54 | 0.98 | 0.33 | 0.00 | 0.63 | <b>3</b> | <b>0.50</b> | <b>0.09</b> |
| CY1_HUMAN (P08574) Cytochrome c1, heme protein, mitochondrial precursor (Cytochrome c-1) [MASS=35390]                                                                                                  | 1.00 | 1.04 | 1.00 | 1.14 | 1.00 | 1.37 | <b>3</b> | <b>1.18</b> | <b>0.10</b> |
| DHE3_HUMAN (P00367) Glutamate dehydrogenase 1, mitochondrial precursor (EC 1.4.1.3) (GDH) [MASS=61397]                                                                                                 | 1.00 | 2.19 | 1.00 | 2.66 | 1.00 | 2.36 | <b>3</b> | <b>2.40</b> | <b>0.14</b> |
| DHSA_HUMAN (P31040) Succinate dehydrogenase [ubiquinone] flavoprotein subunit, mitochondrial precursor (EC 1.3.5.1) (Fp) (Flavoprotein subunit of complex II) [MASS=72691]                             | 1.00 | 1.08 | 1.00 | 1.53 | 1.00 | 1.39 | <b>3</b> | <b>1.33</b> | <b>0.13</b> |
| DHSB_HUMAN (P21912) Succinate dehydrogenase [ubiquinone] iron-sulfur protein, mitochondrial precursor (EC 1.3.5.1) (Ip) (Iron-sulfur subunit of complex II) [MASS=31630]                               | 1.00 | 1.06 | 1.00 | 2.02 | 1.00 | 1.95 | <b>3</b> | <b>1.68</b> | <b>0.31</b> |
| DLDH_HUMAN (P09622) Dihydrolipoyl dehydrogenase, mitochondrial precursor (EC 1.8.1.4) (Dihydrolipoamide dehydrogenase) (Glycine cleavage system L protein) [MASS=54150]                                | 0.97 | 1.42 | 1.00 | 1.44 | 1.00 | 1.22 | <b>3</b> | <b>1.36</b> | <b>0.07</b> |

|                                                                                                                                                                                                                                                                             |      |      |      |      |      |      |          |             |             |
|-----------------------------------------------------------------------------------------------------------------------------------------------------------------------------------------------------------------------------------------------------------------------------|------|------|------|------|------|------|----------|-------------|-------------|
| DNJA2_HUMAN (O60884) DnaJ homolog subfamily A member 2 (HIRA-interacting protein 4) (Cell cycle progression restoration gene 3 protein) (Dnj3) (NY-REN-14 antigen) [MASS=45745]                                                                                             | 0.00 | 1.61 | 0.00 | 1.40 | 0.93 | 1.95 | <b>3</b> | <b>1.65</b> | <b>0.16</b> |
| DPYL2_HUMAN (Q16555) Dihydropyrimidinase-related protein 2 (DRP2) (Collapsin response mediator protein 2) (CRMP-2) (N2A3) [MASS=62293]                                                                                                                                      | 1.00 | 0.49 | 1.00 | 0.58 | 1.00 | 0.62 | <b>3</b> | <b>0.56</b> | <b>0.04</b> |
| DYN1_HUMAN (Q05193) Dynamin-1 (EC 3.6.5.5) [MASS=97407]                                                                                                                                                                                                                     | 1.00 | 0.51 | 1.00 | 1.01 | 0.65 | 0.59 | <b>3</b> | <b>0.70</b> | <b>0.16</b> |
| EAA2_HUMAN (P43004) Excitatory amino acid transporter 2 (Sodium-dependent glutamate/aspartate transporter 2) [MASS=62104]                                                                                                                                                   | 1.00 | 0.36 | 1.00 | 0.43 | 1.00 | 0.53 | <b>3</b> | <b>0.44</b> | <b>0.05</b> |
| ECHA_HUMAN (P40939) Trifunctional enzyme subunit alpha, mitochondrial precursor (TP-alpha) (78 kDa gastrin-binding protein) [Includes: Long-chain enoyl-CoA hydratase (EC 4.2.1.17); Long chain 3-hydroxyacyl-CoA dehydrogenase (EC 1.1.1.211)] [MASS=82999]                | 1.00 | 1.51 | 1.00 | 1.29 | 1.00 | 1.32 | <b>3</b> | <b>1.37</b> | <b>0.07</b> |
| EFTU_HUMAN (P49411) Elongation factor Tu, mitochondrial precursor (EF-Tu) (P43) [MASS=49541]                                                                                                                                                                                | 1.00 | 1.25 | 1.00 | 1.39 | 1.00 | 1.45 | <b>3</b> | <b>1.36</b> | <b>0.06</b> |
| EPHA4_HUMAN (P54764) Ephrin type-A receptor 4 precursor (EC 2.7.10.1) (Tyrosine-protein kinase receptor SEK) (Receptor protein-tyrosine kinase HEK8) [MASS=109859]                                                                                                          | 0.00 | 0.83 | 0.00 | 0.47 | 0.00 | 0.56 | <b>3</b> | <b>0.62</b> | <b>0.11</b> |
| ETFD_HUMAN (Q16134) Electron transfer flavoprotein-ubiquinone oxidoreductase, mitochondrial precursor (EC 1.5.5.1) (ETF-QO) (ETF-ubiquinone oxidoreductase) (ETF dehydrogenase) (Electron-transferring-flavoprotein dehydrogenase) [MASS=68507]                             | 0.97 | 2.04 | 1.00 | 1.91 | 0.86 | 1.77 | <b>3</b> | <b>1.91</b> | <b>0.08</b> |
| G3P_HUMAN (P04406) Glyceraldehyde-3-phosphate dehydrogenase (EC 1.2.1.12) (GAPDH) [MASS=35922]                                                                                                                                                                              | 1.00 | 0.60 | 1.00 | 0.83 | 1.00 | 0.68 | <b>3</b> | <b>0.70</b> | <b>0.07</b> |
| G6PI_HUMAN (P06744) Glucose-6-phosphate isomerase (EC 5.3.1.9) (GPI) (Phosphoglucose isomerase) (PGI) (Phosphohexose isomerase) (PHI) (Neuroleukin) (NLK) (Sperm antigen 36) (SA-36) [MASS=63015]                                                                           | 0.95 | 0.80 | 1.00 | 0.87 | 0.35 | 0.71 | <b>3</b> | <b>0.79</b> | <b>0.05</b> |
| GABT_HUMAN (P80404) 4-aminobutyrate aminotransferase, mitochondrial precursor (EC 2.6.1.19) ((S)-3-amino-2-methylpropionate transaminase) (EC 2.6.1.22) (Gamma-amino-N-butyrate transaminase) (GABA transaminase) (GABA aminotransferase) (GABA-AT) (GABA-T) ( [MASS=56439] | 1.00 | 1.03 | 1.00 | 1.25 | 1.00 | 1.25 | <b>3</b> | <b>1.18</b> | <b>0.07</b> |

|                                                                                                                                                                                |      |      |      |      |      |      |          |             |             |
|--------------------------------------------------------------------------------------------------------------------------------------------------------------------------------|------|------|------|------|------|------|----------|-------------|-------------|
| GBB1_HUMAN (P62873) Guanine nucleotide-binding protein G(I)/G(S)/G(T) subunit beta 1 (Transducin beta chain 1) [MASS=37246]                                                    | 1.00 | 0.56 | 1.00 | 0.55 | 1.00 | 0.53 | <b>3</b> | <b>0.55</b> | <b>0.01</b> |
| GBB2_HUMAN (P62879) Guanine nucleotide-binding protein G(I)/G(S)/G(T) subunit beta 2 (Transducin beta chain 2) (G protein beta 2 subunit) [MASS=37200]                         | 1.00 | 0.58 | 0.99 | 0.55 | 0.00 | 1.07 | <b>3</b> | <b>0.73</b> | <b>0.17</b> |
| GBB3_HUMAN (P16520) Guanine nucleotide-binding protein G(I)/G(S)/G(T) subunit beta 3 (Transducin beta chain 3) [MASS=37221]                                                    | 0.56 | 0.65 | 0.73 | 1.42 | 0.00 | 1.66 | <b>3</b> | <b>1.24</b> | <b>0.30</b> |
| GBG12_HUMAN (Q9UBI6) Guanine nucleotide-binding protein G(I)/G(S)/G(O) gamma-12 subunit precursor [MASS=7875]                                                                  | 0.99 | 0.73 | 0.99 | 0.73 | 0.94 | 0.77 | <b>3</b> | <b>0.74</b> | <b>0.01</b> |
| GBG2_HUMAN (P59768) Guanine nucleotide-binding protein G(I)/G(S)/G(O) gamma-2 subunit precursor (G gamma-1) [MASS=7719]                                                        | 1.00 | 0.61 | 1.00 | 0.48 | 1.00 | 0.52 | <b>3</b> | <b>0.54</b> | <b>0.04</b> |
| GBG3_HUMAN (P63215) Guanine nucleotide-binding protein G(I)/G(S)/G(O) gamma-3 subunit precursor [MASS=8305]                                                                    | 0.00 | 1.09 | 0.80 | 0.57 | 0.99 | 1.19 | <b>3</b> | <b>0.95</b> | <b>0.19</b> |
| GBG7_HUMAN (O60262) Guanine nucleotide-binding protein G(I)/G(S)/G(O) gamma-7 subunit precursor [MASS=7522]                                                                    | 1.00 | 0.72 | 0.98 | 0.38 | 0.97 | 0.77 | <b>3</b> | <b>0.62</b> | <b>0.12</b> |
| GHC1_HUMAN (Q9H936) Mitochondrial glutamate carrier 1 (GC-1) (Glutamate/H(+)) symporter 1 (Solute carrier family 25 member 22) [MASS=34470]                                    | 1.00 | 0.83 | 1.00 | 1.23 | 1.00 | 0.72 | <b>3</b> | <b>0.93</b> | <b>0.15</b> |
| GLSK_HUMAN (O94925) Glutaminase kidney isoform, mitochondrial precursor (EC 3.5.1.2) (GLS) (L-glutamine amidohydrolase) (K-glutaminase) [MASS=73461]                           | 1.00 | 1.36 | 1.00 | 1.12 | 1.00 | 1.41 | <b>3</b> | <b>1.30</b> | <b>0.09</b> |
| GNAO1_HUMAN (P09471) Guanine nucleotide-binding protein G(o) subunit alpha 1 [MASS=39919]                                                                                      | 1.00 | 0.46 | 1.00 | 1.06 | 1.00 | 0.52 | <b>3</b> | <b>0.68</b> | <b>0.19</b> |
| GNAO2_HUMAN (P29777) Guanine nucleotide-binding protein G(o) subunit alpha 2 [MASS=39955]                                                                                      | 1.00 | 0.07 | 1.00 | 0.85 | 0.86 | 1.09 | <b>3</b> | <b>0.67</b> | <b>0.31</b> |
| GPM6A_HUMAN (P51674) Neuronal membrane glycoprotein M6-a (M6a) [MASS=31209]                                                                                                    | 1.00 | 0.36 | 1.00 | 0.56 | 1.00 | 0.62 | <b>3</b> | <b>0.51</b> | <b>0.08</b> |
| GPVI_HUMAN (Q9HCN6) Platelet glycoprotein VI precursor [MASS=36923]                                                                                                            | 0.30 | 1.69 | 0.00 | 1.50 | 0.00 | 1.75 | <b>3</b> | <b>1.65</b> | <b>0.08</b> |
| GRP75_HUMAN (P38646) Stress-70 protein, mitochondrial precursor (75 kDa glucose-regulated protein) (GRP 75) (Peptide-binding protein 74) (PBP74) (Mortalin) (MOT) [MASS=73680] | 0.00 | 1.19 | 0.53 | 1.92 | 0.99 | 0.49 | <b>3</b> | <b>1.20</b> | <b>0.41</b> |
| HBB_HUMAN (P68871) Hemoglobin subunit beta (Hemoglobin beta chain) (Beta-globin) [MASS=15867]                                                                                  | 1.00 | 0.52 | 1.00 | 0.59 | 0.94 | 0.53 | <b>3</b> | <b>0.55</b> | <b>0.02</b> |

|                                                                                                                                                                                                     |      |      |      |      |      |      |          |             |             |
|-----------------------------------------------------------------------------------------------------------------------------------------------------------------------------------------------------|------|------|------|------|------|------|----------|-------------|-------------|
| HGF_HUMAN (P14210) Hepatocyte growth factor precursor (Scatter factor) (SF) (Hepatopoeitin A) [Contains: Hepatocyte growth factor alpha chain; Hepatocyte growth factor beta chain] [MASS=83133]    | 0.00 | 1.40 | 0.40 | 1.38 | 0.00 | 2.72 | <b>3</b> | <b>1.83</b> | <b>0.44</b> |
| HPLN2_HUMAN (Q9GZV7) Hyaluronan and proteoglycan link protein 2 precursor (Brain link protein 1) [MASS=37775]                                                                                       | 0.96 | 0.49 | 0.97 | 0.47 | 0.27 | 0.38 | <b>3</b> | <b>0.45</b> | <b>0.03</b> |
| HXK1_HUMAN (P19367) Hexokinase-1 (EC 2.7.1.1) (Hexokinase type I) (HK I) (Brain form hexokinase) [MASS=102484]                                                                                      | 1.00 | 1.17 | 1.00 | 1.25 | 1.00 | 1.31 | <b>3</b> | <b>1.24</b> | <b>0.04</b> |
| ICAM5_HUMAN (Q9UMF0) Intercellular adhesion molecule 5 precursor (ICAM-5) (Telencephalin) [MASS=97330]                                                                                              | 1.00 | 0.43 | 0.72 | 0.40 | 1.00 | 0.53 | <b>3</b> | <b>0.45</b> | <b>0.04</b> |
| IDH3A_HUMAN (P50213) Isocitrate dehydrogenase [NAD] subunit alpha, mitochondrial precursor (EC 1.1.1.41) (Isocitric dehydrogenase) (NAD(+)-specific ICDH) [MASS=39591]                              | 0.96 | 1.00 | 0.99 | 1.43 | 0.44 | 1.37 | <b>3</b> | <b>1.27</b> | <b>0.13</b> |
| IDH3G_HUMAN (P51553) Isocitrate dehydrogenase [NAD] subunit gamma, mitochondrial precursor (EC 1.1.1.41) (Isocitric dehydrogenase) (NAD(+)-specific ICDH) [MASS=42794]                              | 1.00 | 1.28 | 0.96 | 1.56 | 0.95 | 1.37 | <b>3</b> | <b>1.40</b> | <b>0.08</b> |
| IDHP_HUMAN (P48735) Isocitrate dehydrogenase [NADP], mitochondrial precursor (EC 1.1.1.42) (Oxalosuccinate decarboxylase) (IDH) (NADP(+)-specific ICDH) (IDP) (ICD-M) [MASS=50909]                  | 1.00 | 1.10 | 1.00 | 1.23 | 1.00 | 1.32 | <b>3</b> | <b>1.22</b> | <b>0.06</b> |
| IGS4B_HUMAN (Q8N126) Immunoglobulin superfamily member 4B precursor (Nectin-like protein 1) (TSLC1-like protein 1) (Synaptic cell adhesion molecule 3) (Brain immunoglobulin receptor) [MASS=43300] | 1.00 | 0.40 | 1.00 | 0.45 | 1.00 | 0.42 | <b>3</b> | <b>0.42</b> | <b>0.01</b> |
| KCC2A_HUMAN (Q9UQM7) Calcium/calmodulin-dependent protein kinase type II alpha chain (EC 2.7.11.17) (CaM-kinase II alpha chain) (CaM kinase II alpha subunit) (CaMK-II subunit alpha) [MASS=54029]  | 1.00 | 0.68 | 1.00 | 0.64 | 1.00 | 0.70 | <b>3</b> | <b>0.67</b> | <b>0.02</b> |
| KCC2B_HUMAN (Q13554) Calcium/calmodulin-dependent protein kinase type II beta chain (EC 2.7.11.17) (CaM-kinase II beta chain) (CaM kinase II subunit beta) (CaMK-II subunit beta) [MASS=72726]      | 1.00 | 0.71 | 1.00 | 0.89 | 1.00 | 0.84 | <b>3</b> | <b>0.81</b> | <b>0.05</b> |
| KCRB_HUMAN (P12277) Creatine kinase B-type (EC 2.7.3.2) (Creatine kinase B chain) (B-CK) [MASS=42644]                                                                                               | 1.00 | 0.72 | 1.00 | 0.75 | 1.00 | 0.71 | <b>3</b> | <b>0.73</b> | <b>0.01</b> |
| KCRU_HUMAN (P12532) Creatine kinase, ubiquitous mitochondrial precursor (EC 2.7.3.2) (U-MtCK) (Mia-CK) (Acidic-type mitochondrial creatine kinase) [MASS=47036]                                     | 1.00 | 1.18 | 1.00 | 1.19 | 1.00 | 1.22 | <b>3</b> | <b>1.20</b> | <b>0.01</b> |

|                                                                                                                                                                                                                                                        |      |      |      |      |      |      |          |             |             |
|--------------------------------------------------------------------------------------------------------------------------------------------------------------------------------------------------------------------------------------------------------|------|------|------|------|------|------|----------|-------------|-------------|
| KPYM_HUMAN (P14618) Pyruvate kinase isozymes M1/M2 (EC 2.7.1.40) (Pyruvate kinase muscle isozyme) (Cytosolic thyroid hormone binding protein) (CTHBP) (THBP1) [MASS=57805]                                                                             | 1.00 | 0.64 | 0.99 | 1.16 | 0.90 | 0.55 | <b>3</b> | <b>0.78</b> | <b>0.19</b> |
| LANC2_HUMAN (Q9NS86) LanC-like protein 2 (Testis-specific adriamycin sensitivity protein) [MASS=50854]                                                                                                                                                 | 0.99 | 1.42 | 0.00 | 2.68 | 0.00 | 2.42 | <b>3</b> | <b>2.17</b> | <b>0.38</b> |
| LDHB_HUMAN (P07195) L-lactate dehydrogenase B chain (EC 1.1.1.27) (LDH-B) (LDH heart subunit) (LDH-H) (NY-REN-46 antigen) [MASS=36507]                                                                                                                 | 1.00 | 0.51 | 1.00 | 0.65 | 1.00 | 0.57 | <b>3</b> | <b>0.58</b> | <b>0.04</b> |
| LEG1_HUMAN (P09382) Galectin-1 (Lectin galactoside-binding soluble 1) (Beta-galactoside-binding lectin L-14-I) (Lactose-binding lectin 1) (S-Lac lectin 1) (Galaptin) (14 kDa lectin) (HPL) (HBL) (Putative MAPK-activating protein MP12) [MASS=14584] | 1.00 | 0.45 | 1.00 | 0.67 | 1.00 | 0.82 | <b>3</b> | <b>0.65</b> | <b>0.11</b> |
| LRP1_HUMAN (Q07954) Low-density lipoprotein receptor-related protein 1 precursor (LRP) (Alpha-2-macroglobulin receptor) (A2MR) (Apolipoprotein E receptor) (APOER) (CD91 antigen) [MASS=504573]                                                        | 0.25 | 1.99 | 0.99 | 0.69 | 0.00 | 0.52 | <b>3</b> | <b>1.07</b> | <b>0.46</b> |
| LY6H_HUMAN (O94772) Lymphocyte antigen Ly-6H precursor [MASS=14669]                                                                                                                                                                                    | 0.99 | 0.83 | 0.97 | 0.66 | 0.99 | 0.59 | <b>3</b> | <b>0.69</b> | <b>0.07</b> |
| MAON_HUMAN (Q16798) NADP-dependent malic enzyme, mitochondrial precursor (EC 1.1.1.40) (NADP-ME) (Malic enzyme 3) [MASS=67054]                                                                                                                         | 0.99 | 1.27 | 1.00 | 1.14 | 0.99 | 2.69 | <b>3</b> | <b>1.70</b> | <b>0.50</b> |
| MDHC_HUMAN (P40925) Malate dehydrogenase, cytoplasmic (EC 1.1.1.37) (Cytosolic malate dehydrogenase) [MASS=36295]                                                                                                                                      | 0.99 | 0.40 | 0.86 | 0.57 | 0.47 | 0.48 | <b>3</b> | <b>0.48</b> | <b>0.05</b> |
| MDHM_HUMAN (P40926) Malate dehydrogenase, mitochondrial precursor (EC 1.1.1.37) [MASS=35531]                                                                                                                                                           | 1.00 | 1.16 | 1.00 | 1.19 | 1.00 | 1.41 | <b>3</b> | <b>1.25</b> | <b>0.08</b> |
| MGST3_HUMAN (O14880) Microsomal glutathione S-transferase 3 (EC 2.5.1.18) (Microsomal GST-3) (Microsomal GST-III) [MASS=16516]                                                                                                                         | 1.00 | 0.95 | 1.00 | 1.28 | 1.00 | 0.99 | <b>3</b> | <b>1.07</b> | <b>0.10</b> |
| MYPR_HUMAN (P60201) Myelin proteolipid protein (PLP) (Lipophilin) [MASS=29946]                                                                                                                                                                         | 1.00 | 1.26 | 1.00 | 1.48 | 1.00 | 1.51 | <b>3</b> | <b>1.42</b> | <b>0.08</b> |
| NCA11_HUMAN (P13591) Neural cell adhesion molecule 1, 140 kDa isoform precursor (N-CAM 140) (NCAM-140) (CD56 antigen) [MASS=93360]                                                                                                                     | 1.00 | 0.39 | 1.00 | 0.33 | 1.00 | 0.51 | <b>3</b> | <b>0.41</b> | <b>0.05</b> |
| NDUA2_HUMAN (O43678) NADH dehydrogenase [ubiquinone] 1 alpha subcomplex subunit 2 (EC 1.6.5.3) (EC 1.6.99.3) (NADH-ubiquinone oxidoreductase B8 subunit) (Complex I-B8) (CI-B8) [MASS=10790]                                                           | 1.00 | 1.05 | 1.00 | 1.28 | 1.00 | 1.42 | <b>3</b> | <b>1.25</b> | <b>0.11</b> |

|                                                                                                                                                                                                                                |      |      |      |      |      |      |          |             |             |
|--------------------------------------------------------------------------------------------------------------------------------------------------------------------------------------------------------------------------------|------|------|------|------|------|------|----------|-------------|-------------|
| NDUAA_HUMAN (O95299) NADH dehydrogenase [ubiquinone] 1 alpha subcomplex subunit 10, mitochondrial precursor (EC 1.6.5.3) (EC 1.6.99.3) (NADH-ubiquinone oxidoreductase 42 kDa subunit) (Complex I-42KD) (CI-42KD) [MASS=40750] | 1.00 | 1.56 | 1.00 | 1.27 | 1.00 | 1.27 | <b>3</b> | <b>1.37</b> | <b>0.10</b> |
| NDUB7_HUMAN (P17568) NADH dehydrogenase [ubiquinone] 1 beta subcomplex subunit 7 (EC 1.6.5.3) (EC 1.6.99.3) (NADH-ubiquinone oxidoreductase B18 subunit) (Complex I-B18) (CI-B18) (Cell adhesion protein SQM1) [MASS=16271]    | 1.00 | 1.20 | 1.00 | 0.94 | 1.00 | 1.12 | <b>3</b> | <b>1.09</b> | <b>0.08</b> |
| NFASC_HUMAN (O94856) Neurofascin precursor [MASS=150026]                                                                                                                                                                       | 1.00 | 0.82 | 0.99 | 0.57 | 1.00 | 0.61 | <b>3</b> | <b>0.67</b> | <b>0.08</b> |
| NIPS2_HUMAN (O75323) Protein NipSnap2 (Glioblastoma amplified sequence) [MASS=33742]                                                                                                                                           | 1.00 | 1.00 | 1.00 | 1.08 | 0.96 | 1.21 | <b>3</b> | <b>1.10</b> | <b>0.06</b> |
| NKTR_HUMAN (P30414) NK-tumor recognition protein (Natural-killer cells cyclophilin-related protein) (NK-TR protein) [MASS=165675]                                                                                              | 0.00 | 1.68 | 0.00 | 1.21 | 0.00 | 1.00 | <b>3</b> | <b>1.30</b> | <b>0.20</b> |
| NNTM_HUMAN (Q13423) NAD(P) transhydrogenase, mitochondrial precursor (EC 1.6.1.2) (Pyridine nucleotide transhydrogenase) (Nicotinamide nucleotide transhydrogenase) [MASS=113895]                                              | 1.00 | 0.96 | 1.00 | 0.89 | 1.00 | 1.21 | <b>3</b> | <b>1.02</b> | <b>0.10</b> |
| NPTN_HUMAN (Q9Y639) Neuroplastin precursor (Stromal cell-derived receptor 1) (SDR-1) [MASS=31291]                                                                                                                              | 1.00 | 0.38 | 1.00 | 0.46 | 1.00 | 0.52 | <b>3</b> | <b>0.45</b> | <b>0.04</b> |
| NSF_HUMAN (P46459) Vesicle-fusing ATPase (EC 3.6.4.6) (Vesicular-fusion protein NSF) (N-ethylmaleimide sensitive fusion protein) (NEM-sensitive fusion protein) [MASS=82654]                                                   | 1.00 | 0.61 | 1.00 | 0.65 | 0.97 | 0.37 | <b>3</b> | <b>0.54</b> | <b>0.09</b> |
| NUAM_HUMAN (P28331) NADH-ubiquinone oxidoreductase 75 kDa subunit, mitochondrial precursor (EC 1.6.5.3) (EC 1.6.99.3) (Complex I-75Kd) (CI-75Kd) [MASS=79467]                                                                  | 1.00 | 1.17 | 1.00 | 1.27 | 1.00 | 1.45 | <b>3</b> | <b>1.30</b> | <b>0.08</b> |
| NUBM_HUMAN (P49821) NADH-ubiquinone oxidoreductase 51 kDa subunit, mitochondrial precursor (EC 1.6.5.3) (EC 1.6.99.3) (Complex I-51KD) (CI-51KD) (NADH dehydrogenase flavoprotein 1) [MASS=50817]                              | 1.00 | 0.90 | 1.00 | 1.03 | 1.00 | 1.77 | <b>3</b> | <b>1.23</b> | <b>0.27</b> |
| NUHM_HUMAN (P19404) NADH-ubiquinone oxidoreductase 24 kDa subunit, mitochondrial precursor (EC 1.6.5.3) (EC 1.6.99.3) [MASS=27391]                                                                                             | 1.00 | 0.95 | 1.00 | 1.45 | 1.00 | 1.78 | <b>3</b> | <b>1.39</b> | <b>0.24</b> |



|                                                                                                                                                                                                                                                                             |      |      |      |      |      |      |          |             |             |
|-----------------------------------------------------------------------------------------------------------------------------------------------------------------------------------------------------------------------------------------------------------------------------|------|------|------|------|------|------|----------|-------------|-------------|
| NUKM_HUMAN (O75251) NADH-ubiquinone oxidoreductase 20 kDa subunit, mitochondrial precursor (EC 1.6.5.3) (EC 1.6.99.3) (Complex I-20KD) (CI-20KD) (PSST subunit) [MASS=23563]                                                                                                | 0.71 | 1.12 | 0.45 | 1.60 | 0.94 | 1.26 | <b>3</b> | <b>1.33</b> | <b>0.14</b> |
| NUMM_HUMAN (O75380) NADH-ubiquinone oxidoreductase 13 kDa-A subunit, mitochondrial precursor (EC 1.6.5.3) (EC 1.6.99.3) (Complex I-13KD-A) (CI-13KD-A) [MASS=13712]                                                                                                         | 1.00 | 0.82 | 1.00 | 1.22 | 1.00 | 1.39 | <b>3</b> | <b>1.14</b> | <b>0.17</b> |
| OBSCN_HUMAN (Q5VST9) Obscurin (Obscurin-myosin light chain kinase) (Obscurin-MLCK) (Obscurin-RhoGEF) [MASS=868479]                                                                                                                                                          | 0.00 | 0.36 | 0.00 | 1.12 | 0.00 | 0.61 | <b>3</b> | <b>0.70</b> | <b>0.22</b> |
| ODP2_HUMAN (P10515) Dihydrolipoyllysine-residue acetyltransferase component of pyruvate dehydrogenase complex, mitochondrial precursor (EC 2.3.1.12) (Pyruvate dehydrogenase complex E2 subunit) (PDCE2) (E2) (Dihydrolipoamide S-acetyltransferase component) [MASS=65781] | 0.69 | 1.55 | 1.00 | 1.58 | 0.62 | 0.99 | <b>3</b> | <b>1.37</b> | <b>0.19</b> |
| ODPB_HUMAN (P11177) Pyruvate dehydrogenase E1 component subunit beta, mitochondrial precursor (EC 1.2.4.1) (PDHE1-B) [MASS=39219]                                                                                                                                           | 1.00 | 0.99 | 0.76 | 0.99 | 0.00 | 1.05 | <b>3</b> | <b>1.01</b> | <b>0.02</b> |
| OPA1_HUMAN (O60313) Dynamin-like 120 kDa protein, mitochondrial precursor (Optic atrophy 1 gene protein) [MASS=111657]                                                                                                                                                      | 1.00 | 0.97 | 1.00 | 1.24 | 1.00 | 1.22 | <b>3</b> | <b>1.14</b> | <b>0.09</b> |
| OPCM_HUMAN (Q14982) Opioid-binding protein/cell adhesion molecule precursor (OBCAM) (Opioid-binding cell adhesion molecule) (OPCML) [MASS=38007]                                                                                                                            | 1.00 | 0.90 | 0.99 | 0.78 | 0.98 | 1.48 | <b>3</b> | <b>1.05</b> | <b>0.22</b> |
| PARK7_HUMAN (Q99497) Protein DJ-1 (Oncogene DJ1) [MASS=19891]                                                                                                                                                                                                               | 1.00 | 0.65 | 1.00 | 0.80 | 1.00 | 0.66 | <b>3</b> | <b>0.70</b> | <b>0.05</b> |
| PGK1_HUMAN (P00558) Phosphoglycerate kinase 1 (EC 2.7.2.3) (Primer recognition protein 2) (PRP 2) [MASS=44483]                                                                                                                                                              | 1.00 | 0.65 | 1.00 | 0.91 | 1.00 | 1.08 | <b>3</b> | <b>0.88</b> | <b>0.13</b> |
| PRDX3_HUMAN (P30048) Thioredoxin-dependent peroxide reductase, mitochondrial precursor (EC 1.11.1.15) (Peroxiredoxin-3) (PRX III) (Antioxidant protein 1) (AOP-1) (Protein MER5 homolog) (HBC189) [MASS=27692]                                                              | 0.99 | 1.08 | 1.00 | 1.75 | 0.99 | 1.64 | <b>3</b> | <b>1.49</b> | <b>0.21</b> |
| RAC1_HUMAN (P63000) Ras-related C3 botulinum toxin substrate 1 precursor (p21-Rac1) (Ras-like protein TC25) [MASS=21450]                                                                                                                                                    | 1.00 | 0.67 | 1.00 | 0.70 | 0.70 | 0.72 | <b>3</b> | <b>0.70</b> | <b>0.01</b> |

|                                                                                                                                                                                                                                                                             |      |      |      |      |      |      |          |             |             |
|-----------------------------------------------------------------------------------------------------------------------------------------------------------------------------------------------------------------------------------------------------------------------------|------|------|------|------|------|------|----------|-------------|-------------|
| RAI14_HUMAN (Q9P0K7) Ankyrin repeat and coiled-coil structure-containing protein (Retinoic acid-induced protein 14) (Novel retinal pigment epithelial cell protein) [MASS=110041]                                                                                           | 0.42 | 1.31 | 0.22 | 2.06 | 0.80 | 1.95 | <b>3</b> | <b>1.77</b> | <b>0.23</b> |
| RHOA_HUMAN (P61586) Transforming protein RhoA precursor (H12) [MASS=21768]                                                                                                                                                                                                  | 0.99 | 0.74 | 0.92 | 1.84 | 0.98 | 0.68 | <b>3</b> | <b>1.09</b> | <b>0.38</b> |
| RINI_HUMAN (P13489) Ribonuclease inhibitor (Ribonuclease/angiogenin inhibitor 1) (RAI) (Placental ribonuclease inhibitor) (RNase inhibitor) (RI) [MASS=49842]                                                                                                               | 0.00 | 0.23 | 0.00 | 2.32 | 0.00 | 0.75 | <b>3</b> | <b>1.10</b> | <b>0.63</b> |
| RL18A_HUMAN (Q02543) 60S ribosomal protein L18a [MASS=20762]                                                                                                                                                                                                                | 0.00 | 0.86 | 0.98 | 1.02 | 1.00 | 1.19 | <b>3</b> | <b>1.02</b> | <b>0.10</b> |
| RS16_HUMAN (P62249) 40S ribosomal protein S16 [MASS=16314]                                                                                                                                                                                                                  | 0.99 | 1.07 | 1.00 | 1.03 | 1.00 | 1.06 | <b>3</b> | <b>1.05</b> | <b>0.01</b> |
| SAP_HUMAN (P07602) Proactivator polypeptide precursor [Contains: Saposin A (Protein A); Saposin B-Val; Saposin B (Sphingolipid activator protein 1) (SAP-1) (Cerebroside sulfate activator) (CSAct) (Dispersin) (Sulfatide/GM1 activator); Saposin C (Co-beta- [MASS=58112] | 1.00 | 2.44 | 1.00 | 2.41 | 1.00 | 2.22 | <b>3</b> | <b>2.36</b> | <b>0.07</b> |
| SATT_HUMAN (P43007) Neutral amino acid transporter A (SATT) (Alanine/serine/cysteine/ threonine transporter) (ASCT1) [MASS=55723]                                                                                                                                           | 1.00 | 0.40 | 1.00 | 0.37 | 1.00 | 0.42 | <b>3</b> | <b>0.40</b> | <b>0.01</b> |
| SCOT_HUMAN (P55809) Succinyl-CoA:3-ketoacid-coenzyme A transferase 1, mitochondrial precursor (EC 2.8.3.5) (Somatic-type succinyl CoA:3-oxoacid CoA-transferase) (Scot-S) [MASS=56157]                                                                                      | 1.00 | 1.09 | 1.00 | 1.33 | 1.00 | 1.42 | <b>3</b> | <b>1.28</b> | <b>0.10</b> |
| SEPT5_HUMAN (Q99719) Septin-5 (Peanut-like protein 1) (Cell division control-related protein 1) (CDCrel-1) [MASS=42777]                                                                                                                                                     | 1.00 | 0.60 | 1.00 | 0.63 | 0.61 | 0.72 | <b>3</b> | <b>0.65</b> | <b>0.04</b> |
| SEPT7_HUMAN (Q16181) Septin-7 (CDC10 protein homolog) [MASS=50680]                                                                                                                                                                                                          | 1.00 | 0.67 | 1.00 | 0.67 | 1.00 | 0.79 | <b>3</b> | <b>0.71</b> | <b>0.04</b> |
| SHPS1_HUMAN (P78324) Tyrosine-protein phosphatase non-receptor type substrate 1 precursor (SHP substrate 1) (SHPS-1) (Inhibitory receptor SHPS-1) (Signal-regulatory protein alpha-1) (Sirp-alpha-1) (Sirp-alpha-2) (Sirp-alpha-3) (MyD-1 antigen) (Brain Ig-I [MASS=54812] | 1.00 | 0.34 | 1.00 | 0.29 | 1.00 | 0.45 | <b>3</b> | <b>0.36</b> | <b>0.05</b> |
| SIRB1_HUMAN (O00241) Signal-regulatory protein beta-1 precursor (SIRP-beta-1) (CD172b antigen) [MASS=43255]                                                                                                                                                                 | 0.97 | 0.26 | 1.00 | 0.23 | 0.00 | 0.37 | <b>3</b> | <b>0.29</b> | <b>0.04</b> |

|                                                                                                                                                                                                         |      |      |      |      |      |      |          |             |             |
|---------------------------------------------------------------------------------------------------------------------------------------------------------------------------------------------------------|------|------|------|------|------|------|----------|-------------|-------------|
| SMCE1_HUMAN (Q969G3) SWI/SNF-related matrix-associated actin-dependent regulator of chromatin subfamily E member 1 (BRG1-associated factor 57) [MASS=46649]                                             | 0.00 | 0.12 | 0.00 | 0.17 | 0.00 | 0.12 | <b>3</b> | <b>0.14</b> | <b>0.02</b> |
| SNAB_HUMAN (Q9H115) Beta-soluble NSF attachment protein (SNAP-beta) (N-ethylmaleimide-sensitive factor attachment protein, beta) [MASS=33557]                                                           | 1.00 | 0.88 | 1.00 | 0.90 | 1.00 | 1.03 | <b>3</b> | <b>0.94</b> | <b>0.05</b> |
| SORCN_HUMAN (P30626) Sorcin (22 kDa protein) (CP-22) (V19) [MASS=21676]                                                                                                                                 | 0.88 | 0.73 | 0.67 | 0.73 | 0.00 | 0.69 | <b>3</b> | <b>0.72</b> | <b>0.01</b> |
| STXB1_HUMAN (P61764) Syntaxin-binding protein 1 (Unc-18 homolog) (Unc-18A) (Unc-18-1) (N-Sec1) (p67) [MASS=67568]                                                                                       | 1.00 | 0.65 | 1.00 | 0.57 | 1.00 | 0.52 | <b>3</b> | <b>0.58</b> | <b>0.04</b> |
| SYFB_HUMAN (Q9NSD9) Phenylalanyl-tRNA synthetase beta chain (EC 6.1.1.20) (Phenylalanine--tRNA ligase beta chain) (PheRS) [MASS=66129]                                                                  | 0.83 | 0.96 | 1.00 | 1.81 | 1.00 | 1.19 | <b>3</b> | <b>1.32</b> | <b>0.25</b> |
| SYPH_HUMAN (P08247) Synaptophysin (Major synaptic vesicle protein p38) [MASS=33845]                                                                                                                     | 1.00 | 0.43 | 1.00 | 0.49 | 1.00 | 0.57 | <b>3</b> | <b>0.50</b> | <b>0.04</b> |
| TBA1_HUMAN (P68366) Tubulin alpha-1 chain (Alpha-tubulin 1) (Testis-specific alpha-tubulin) (Tubulin H2-alpha) [MASS=49924]                                                                             | 1.00 | 0.71 | 1.00 | 0.72 | 1.00 | 0.82 | <b>3</b> | <b>0.75</b> | <b>0.04</b> |
| TBB2_HUMAN (P07437) Tubulin beta-2 chain [MASS=49671]                                                                                                                                                   | 1.00 | 0.64 | 1.00 | 0.81 | 1.00 | 0.86 | <b>3</b> | <b>0.77</b> | <b>0.07</b> |
| TENR_HUMAN (Q92752) Tenascin-R precursor (TN-R) (Restrictin) (Janusin) [MASS=149547]                                                                                                                    | 0.00 | 0.53 | 0.51 | 0.79 | 0.00 | 0.57 | <b>3</b> | <b>0.63</b> | <b>0.08</b> |
| THIL_HUMAN (P24752) Acetyl-CoA acetyltransferase, mitochondrial precursor (EC 2.3.1.9) (Acetoacetyl-CoA thiolase) (T2) [MASS=45199]                                                                     | 1.00 | 1.18 | 1.00 | 1.46 | 1.00 | 1.67 | <b>3</b> | <b>1.44</b> | <b>0.14</b> |
| THY1_HUMAN (P04216) Thy-1 membrane glycoprotein precursor (Thy 1 antigen) (CD90 antigen) (CDw90 antigen) [MASS=17935]                                                                                   | 0.99 | 0.38 | 0.99 | 0.48 | 0.99 | 0.48 | <b>3</b> | <b>0.45</b> | <b>0.03</b> |
| TIM10_HUMAN (P62072) Mitochondrial import inner membrane translocase subunit Tim10 [MASS=10333]                                                                                                         | 1.00 | 1.61 | 0.39 | 1.54 | 0.50 | 1.13 | <b>3</b> | <b>1.43</b> | <b>0.15</b> |
| TIM9_HUMAN (Q9Y5J7) Mitochondrial import inner membrane translocase subunit Tim9 [MASS=10378]                                                                                                           | 0.75 | 1.15 | 1.00 | 1.53 | 0.00 | 1.51 | <b>3</b> | <b>1.40</b> | <b>0.12</b> |
| UCHL1_HUMAN (P09936) Ubiquitin carboxyl-terminal hydrolase isozyme L1 (EC 3.4.19.12) (EC 6.-.-.-) (UCH-L1) (Ubiquitin thioesterase L1) (Neuron cytoplasmic protein 9.5) (PGP 9.5) (PGP9.5) [MASS=24824] | 1.00 | 0.53 | 1.00 | 0.67 | 1.00 | 1.02 | <b>3</b> | <b>0.74</b> | <b>0.15</b> |
| UCP4_HUMAN (O95847) Mitochondrial uncoupling protein 4 (UCP 4) (Solute carrier family 25 member 27) [MASS=36064]                                                                                        | 0.98 | 1.46 | 0.99 | 0.68 | 0.99 | 0.85 | <b>3</b> | <b>1.00</b> | <b>0.24</b> |

|                                                                                                                                                                                                                                   |      |      |      |      |      |      |          |             |             |
|-----------------------------------------------------------------------------------------------------------------------------------------------------------------------------------------------------------------------------------|------|------|------|------|------|------|----------|-------------|-------------|
| UCRH_HUMAN (P07919) Ubiquinol-cytochrome c reductase complex 11 kDa protein, mitochondrial precursor (EC 1.10.2.2) (Mitochondrial hinge protein) (Cytochrome C1, nonheme 11 kDa protein) (Complex III subunit VIII) [MASS=10739]  | 1.00 | 1.19 | 1.00 | 1.10 | 1.00 | 1.57 | <b>3</b> | <b>1.29</b> | <b>0.14</b> |
| UQCR1_HUMAN (P31930) Ubiquinol-cytochrome-c reductase complex core protein I, mitochondrial precursor (EC 1.10.2.2) [MASS=52645]                                                                                                  | 1.00 | 1.05 | 1.00 | 1.24 | 1.00 | 1.45 | <b>3</b> | <b>1.25</b> | <b>0.12</b> |
| UQCR2_HUMAN (P22695) Ubiquinol-cytochrome-c reductase complex core protein 2, mitochondrial precursor (EC 1.10.2.2) (Complex III subunit II) [MASS=48443]                                                                         | 1.00 | 1.11 | 0.99 | 1.31 | 1.00 | 1.24 | <b>3</b> | <b>1.22</b> | <b>0.06</b> |
| VA0D_HUMAN (P61421) Vacuolar ATP synthase subunit d (EC 3.6.3.14) (V-ATPase d subunit) (Vacuolar proton pump d subunit) (V-ATPase AC39 subunit) (V-ATPase 40 kDa accessory protein) (P39) (32 kDa accessory protein) [MASS=40329] | 1.00 | 0.81 | 0.76 | 0.48 | 0.69 | 0.71 | <b>3</b> | <b>0.67</b> | <b>0.10</b> |
| VATA1_HUMAN (P38606) Vacuolar ATP synthase catalytic subunit A, ubiquitous isoform (EC 3.6.3.14) (V-ATPase subunit A 1) (Vacuolar proton pump alpha subunit 1) (V-ATPase 69 kDa subunit 1) (Isoform VA68) [MASS=68304]            | 1.00 | 0.24 | 0.00 | 3.07 | 0.00 | 4.71 | <b>3</b> | <b>2.67</b> | <b>1.31</b> |
| VATB2_HUMAN (P21281) Vacuolar ATP synthase subunit B, brain isoform (EC 3.6.3.14) (V-ATPase B2 subunit) (Vacuolar proton pump B isoform 2) (Endomembrane proton pump 58 kDa subunit) (HO57) [MASS=56500]                          | 1.00 | 0.68 | 0.99 | 0.64 | 0.99 | 0.79 | <b>3</b> | <b>0.70</b> | <b>0.04</b> |
| VDAC1_HUMAN (P21796) Voltage-dependent anion-selective channel protein 1 (VDAC-1) (hVDAC1) (Outer mitochondrial membrane protein porin 1) (Plasmalemmal porin) (Porin 31HL) (Porin 31HM) [MASS=30641]                             | 1.00 | 1.15 | 1.00 | 1.22 | 1.00 | 0.99 | <b>3</b> | <b>1.12</b> | <b>0.07</b> |
| VDAC2_HUMAN (P45880) Voltage-dependent anion-selective channel protein 2 (VDAC-2) (hVDAC2) (Outer mitochondrial membrane protein porin 2) [MASS=38092]                                                                            | 1.00 | 1.03 | 1.00 | 1.18 | 1.00 | 1.08 | <b>3</b> | <b>1.10</b> | <b>0.04</b> |
| VDAC3_HUMAN (Q9Y277) Voltage-dependent anion-selective channel protein 3 (VDAC-3) (hVDAC3) (Outer mitochondrial membrane protein porin 3) [MASS=30658]                                                                            | 1.00 | 1.22 | 1.00 | 1.30 | 0.87 | 1.05 | <b>3</b> | <b>1.19</b> | <b>0.07</b> |
| VISL1_HUMAN (P62760) Visinin-like protein 1 (VILIP) (Hippocalcin-like protein 3) (HLP3) [MASS=22011]                                                                                                                              | 0.68 | 0.75 | 1.00 | 0.74 | 0.00 | 0.82 | <b>3</b> | <b>0.77</b> | <b>0.03</b> |

|                                                                                                                                                                                                                                                                               |      |      |      |       |      |      |   |      |      |
|-------------------------------------------------------------------------------------------------------------------------------------------------------------------------------------------------------------------------------------------------------------------------------|------|------|------|-------|------|------|---|------|------|
| VPP1_HUMAN (Q93050) Vacuolar proton translocating ATPase 116 kDa subunit a isoform 1 (V-ATPase 116 kDa isoform a1) (Clathrin-coated vesicle/synaptic vesicle proton pump 116 kDa subunit) (Vacuolar proton pump subunit 1) (Vacuolar adenosine triphosphatase) [MASS=96412]   | 1.00 | 0.79 | 0.94 | 0.53  | 1.00 | 1.06 | 3 | 0.79 | 0.15 |
| ZN407_HUMAN (Q9C0G0) Zinc finger protein 407 (Fragment) [MASS=126979]                                                                                                                                                                                                         | 0.00 | 0.73 | 0.00 | 10.47 | 0.00 | 3.18 | 3 | 4.79 | 2.93 |
| ZNT3_HUMAN (Q99726) Zinc transporter 3 (ZnT-3) (Solute carrier family 30 member 3) [MASS=41944]                                                                                                                                                                               | 0.66 | 0.92 | 0.00 | 1.38  | 1.00 | 0.69 | 3 | 1.00 | 0.20 |
| 1433B_HUMAN (P31946) 14-3-3 protein beta/alpha (Protein kinase C inhibitor protein 1) (KCIP-1) (Protein 1054) [MASS=27951]                                                                                                                                                    | 0.37 | 1.52 | *    | *     | 0.32 | 0.29 | 2 | 0.91 | 0.62 |
| 1433T_HUMAN (P27348) 14-3-3 protein theta (14-3-3 protein tau) (14-3-3 protein T-cell) (HS1 protein) [MASS=27764]                                                                                                                                                             | 0.96 | 0.98 | 1.00 | 0.79  | *    | *    | 2 | 0.89 | 0.09 |
| ACPM_HUMAN (O14561) Acyl carrier protein, mitochondrial precursor (ACP) (NADH-ubiquinone oxidoreductase 9.6 kDa subunit) (CI-SDAP) [MASS=17417]                                                                                                                               | 0.99 | 1.23 | *    | *     | 1.00 | 2.04 | 2 | 1.64 | 0.41 |
| ADAM2_HUMAN (Q99965) ADAM 2 precursor (A disintegrin and metalloproteinase domain 2) (Fertilin subunit beta) (PH-30) (PH30) [MASS=82457]                                                                                                                                      | 0.00 | 1.97 | *    | *     | 0.00 | 1.16 | 2 | 1.57 | 0.41 |
| ADDA_HUMAN (P35611) Alpha-adducin (Erythrocyte adducin subunit alpha) [MASS=80955]                                                                                                                                                                                            | *    | *    | 1.00 | 1.65  | 0.00 | 2.48 | 2 | 2.07 | 0.42 |
| ADT2_HUMAN (P05141) ADP/ATP translocase 2 (Adenine nucleotide translocator 2) (ANT 2) (ADP,ATP carrier protein 2) (Solute carrier family 25 member 5) (ADP,ATP carrier protein, fibroblast isoform) [MASS=32764]                                                              | 0.87 | *    | 1.00 | 0.58  | 1.00 | 0.04 | 2 | 0.31 | 0.27 |
| ALDOA_HUMAN (P04075) Fructose-bisphosphate aldolase A (EC 4.1.2.13) (Muscle-type aldolase) (Lung cancer antigen NY-LU-1) [MASS=39289]                                                                                                                                         | 1.00 | 0.61 | 1.00 | 0.51  | 1.00 | *    | 2 | 0.56 | 0.05 |
| ALDOC_HUMAN (P09972) Fructose-bisphosphate aldolase C (EC 4.1.2.13) (Brain-type aldolase) [MASS=39324]                                                                                                                                                                        | *    | *    | 0.95 | 1.18  | 1.00 | 0.75 | 2 | 0.97 | 0.22 |
| ANKR6_HUMAN (Q9Y2G4) Ankyrin repeat domain-containing protein 6 [MASS=75722]                                                                                                                                                                                                  | 0.00 | 0.22 | *    | *     | 0.00 | 2.09 | 2 | 1.16 | 0.94 |
| AP2A1_HUMAN (O95782) AP-2 complex subunit alpha-1 (Adapter-related protein complex 2 alpha-1 subunit) (Alpha-adaptin A) (Adaptor protein complex AP-2 alpha-1 subunit) (Clathrin assembly protein complex 2 alpha-A large chain) (100 kDa coated vesicle prote) [MASS=107554] | 0.00 | *    | 1.00 | 0.80  | 1.00 | 0.40 | 2 | 0.60 | 0.20 |

|                                                                                                                                                                                                                                                         |      |      |      |      |      |      |          |             |             |
|---------------------------------------------------------------------------------------------------------------------------------------------------------------------------------------------------------------------------------------------------------|------|------|------|------|------|------|----------|-------------|-------------|
| AP2B1_HUMAN (P63010) AP-2 complex subunit beta-1 (Adapter-related protein complex 2 beta-1 subunit) (Beta-adaptin) (Plasma membrane adaptor HA2/AP2 adaptin beta subunit) (Clathrin assembly protein complex 2 beta large chain) (AP105B) [MASS=104552] | 1.00 | 0.74 | *    | *    | 1.00 | 0.90 | <b>2</b> | <b>0.82</b> | <b>0.08</b> |
| APOD_HUMAN (P05090) Apolipoprotein D precursor (Apo-D) (ApoD) [MASS=21275]                                                                                                                                                                              | 0.63 | 0.52 | 0.77 | 1.12 | *    | *    | <b>2</b> | <b>0.82</b> | <b>0.30</b> |
| ARL3_HUMAN (P36405) ADP-ribosylation factor-like protein 3 [MASS=20455]                                                                                                                                                                                 | *    | *    | 0.00 | 1.07 | 0.88 | 1.21 | <b>2</b> | <b>1.14</b> | <b>0.07</b> |
| AT1A2_HUMAN (P50993) Sodium/potassium-transporting ATPase alpha-2 chain precursor (EC 3.6.3.9) (Sodium pump 2) (Na <sup>+</sup> /K <sup>+</sup> ATPase 2) [MASS=112265]                                                                                 | 0.82 | 0.37 | 1.00 | 0.39 | 0.00 | *    | <b>2</b> | <b>0.38</b> | <b>0.01</b> |
| AT1B2_HUMAN (P14415) Sodium/potassium-transporting ATPase subunit beta-2 (Sodium/potassium-dependent ATPase beta-2 subunit) [MASS=33326]                                                                                                                | *    | *    | 0.00 | 1.23 | 0.94 | 0.66 | <b>2</b> | <b>0.95</b> | <b>0.29</b> |
| ATPA_HUMAN (P25705) ATP synthase alpha chain, mitochondrial precursor (EC 3.6.3.14) [MASS=59750]                                                                                                                                                        | 1.00 | 1.30 | 1.00 | 1.47 | 0.99 | *    | <b>2</b> | <b>1.39</b> | <b>0.09</b> |
| BAP29_HUMAN (Q9UHQ4) B-cell receptor-associated protein 29 (BCR-associated protein Bap29) [MASS=28320]                                                                                                                                                  | *    | *    | 0.75 | 1.08 | 0.00 | 1.23 | <b>2</b> | <b>1.16</b> | <b>0.07</b> |
| BKLH5_HUMAN (Q96NJ5) BTB and kelch domain-containing protein 5 [MASS=70352]                                                                                                                                                                             | *    | *    | 0.00 | 1.32 | 0.00 | 1.12 | <b>2</b> | <b>1.22</b> | <b>0.10</b> |
| BRWD2_HUMAN (Q9BZH6) Bromodomain and WD repeat domain-containing protein 2 (WD repeat protein 11) [MASS=136684]                                                                                                                                         | 0.00 | 0.89 | 0.00 | 0.55 | *    | *    | <b>2</b> | <b>0.72</b> | <b>0.17</b> |
| C163B_HUMAN (Q9NR16) Scavenger receptor cysteine-rich type 1 protein M160 precursor (CD163 antigen-like 1) (CD163b antigen) [MASS=159263]                                                                                                               | 0.20 | 1.26 | *    | *    | 0.00 | 8.78 | <b>2</b> | <b>5.02</b> | <b>3.76</b> |
| CAC1E_HUMAN (Q15878) Voltage-dependent R-type calcium channel subunit alpha-1E (Voltage-gated calcium channel subunit alpha Cav2.3) (Calcium channel, L type, alpha-1 polypeptide, isoform 6) (Brain calcium channel II) (BII) [MASS=261728]            | *    | *    | 0.00 | 1.24 | 0.00 | 0.49 | <b>2</b> | <b>0.87</b> | <b>0.38</b> |
| CAN9_HUMAN (O14815) Calpain-9 (EC 3.4.22.-) (Digestive tract-specific calpain) (nCL-4) (CG36 protein) [MASS=79096]                                                                                                                                      | *    | *    | 0.00 | 2.07 | 0.00 | 1.19 | <b>2</b> | <b>1.63</b> | <b>0.44</b> |
| CD9_HUMAN (P21926) CD9 antigen (p24) (Leukocyte antigen MIC3) (Motility-related protein) (MRP-1) (Tetraspanin-29) (Tspan-29) [MASS=25285]                                                                                                               | 1.00 | 0.99 | *    | *    | 0.99 | 0.90 | <b>2</b> | <b>0.95</b> | <b>0.04</b> |
| CENB2_HUMAN (Q15057) Centaurin-beta 2 (Cnt-b2) [MASS=88028]                                                                                                                                                                                             | 0.00 | 0.46 | 0.00 | 0.24 | *    | *    | <b>2</b> | <b>0.35</b> | <b>0.11</b> |

|                                                                                                                                                                                                                 |      |      |      |       |      |      |   |       |       |
|-----------------------------------------------------------------------------------------------------------------------------------------------------------------------------------------------------------------|------|------|------|-------|------|------|---|-------|-------|
| CHCH6_HUMAN (Q9BRQ6) Coiled-coil-helix-coiled-coil-helix domain-containing protein 6 [MASS=26458]                                                                                                               | 0.00 | 1.49 | 1.00 | 1.34  | *    | *    | 2 | 1.42  | 0.08  |
| CHSTE_HUMAN (Q8NCH0) Carbohydrate sulfotransferase D4ST1 (EC 2.8.2.-) (Dermatan 4-sulfotransferase 1) (D4ST-1) (hD4ST) [MASS=42997]                                                                             | *    | *    | 0.00 | 34.22 | 0.00 | 1.64 | 2 | 17.93 | 16.29 |
| CORO7_HUMAN (P57737) Coronin-7 (70 kDa WD repeat tumor rejection antigen homolog) [MASS=100574]                                                                                                                 | 0.26 | 0.54 | *    | *     | 0.26 | 1.09 | 2 | 0.82  | 0.28  |
| CPLX2_HUMAN (Q6PUV4) Complexin-2 (Complexin II) (CPX II) (Synaphin-1) [MASS=15394]                                                                                                                              | 0.99 | 0.43 | 0.95 | 0.63  | *    | *    | 2 | 0.53  | 0.10  |
| CSR2B_HUMAN (Q9H8E8) Cysteine-rich protein 2-binding protein (CSR2-binding protein) (CRP2BP) (CRP2-binding partner) [MASS=88801]                                                                                | 0.27 | 2.28 | *    | *     | 0.00 | 0.38 | 2 | 1.33  | 0.95  |
| CUGB1_HUMAN (Q92879) CUG triplet repeat RNA-binding protein 1 (CUG-BP1) (RNA-binding protein BRUNOL-2) (Deadenylation factor CUG-BP) (50 kDa Nuclear polyadenylated RNA-binding protein) (EDEN-BP) [MASS=52063] | *    | *    | 0.21 | 0.71  | 0.00 | 0.55 | 2 | 0.63  | 0.08  |
| CUTA_HUMAN (O60888) Protein CutA precursor (Brain acetylcholinesterase putative membrane anchor) (Acetylcholinesterase-associated protein) [MASS=19116]                                                         | 0.00 | 3.97 | 0.00 | 4.26  | *    | *    | 2 | 4.12  | 0.14  |
| DHDDS_HUMAN (Q86SQ9) Dehydrololichyl diphosphate synthase (EC 2.5.1.-) (Dedol-PP synthase) [MASS=38689]                                                                                                         | *    | *    | 0.00 | 0.81  | 0.00 | 0.44 | 2 | 0.63  | 0.19  |
| DHPR_HUMAN (P09417) Dihydropteridine reductase (EC 1.5.1.34) (HDHPR) (Quinoid dihydropteridine reductase) [MASS=25803]                                                                                          | 0.96 | 0.57 | *    | *     | 0.56 | 0.25 | 2 | 0.41  | 0.16  |
| DHX9_HUMAN (Q08211) ATP-dependent RNA helicase A (EC 3.6.1.-) (Nuclear DNA helicase II) (NDH II) (DEAH box protein 9) [MASS=140880]                                                                             | *    | *    | 0.66 | 0.74  | 0.00 | 0.93 | 2 | 0.84  | 0.10  |
| DMXL2_HUMAN (Q8TDJ6) Protein DmX-like 2 (Rabconnectin-3) [MASS=339755]                                                                                                                                          | *    | *    | 0.00 | 0.40  | 0.00 | 2.00 | 2 | 1.20  | 0.80  |
| DOCK4_HUMAN (Q8N110) Deducator of cytokinesis protein 4 [MASS=225147]                                                                                                                                           | 0.00 | 0.63 | 0.00 | 1.70  | *    | *    | 2 | 1.17  | 0.54  |
| DYHC_HUMAN (Q14204) Dynein heavy chain, cytosolic (DYHC) (Cytoplasmic dynein heavy chain 1) (DHC1) (Dynein heavy chain 1, cytoplasmic 1) [MASS=532404]                                                          | 0.00 | 0.92 | 0.96 | 0.53  | *    | *    | 2 | 0.73  | 0.20  |
| DYL1_HUMAN (P63167) Dynein light chain 1, cytoplasmic (Dynein light chain LC8-type 1) (8 kDa dynein light chain) (DLC8) (Protein inhibitor of neuronal nitric oxide synthase) (PIN) [MASS=10366]                | 1.00 | 0.60 | *    | *     | 1.00 | 0.79 | 2 | 0.70  | 0.09  |

|                                                                                                                                                                                                                                                                              |      |       |      |      |      |       |   |       |      |
|------------------------------------------------------------------------------------------------------------------------------------------------------------------------------------------------------------------------------------------------------------------------------|------|-------|------|------|------|-------|---|-------|------|
| DYN3_HUMAN (Q9UQ16) Dynamin-3 (EC 3.6.5.5) (Dynamin, testicular) (T-dynamin) [MASS=96681]                                                                                                                                                                                    | 0.00 | 1.19  | 0.33 | 0.53 | *    | *     | 2 | 0.86  | 0.33 |
| ECHM_HUMAN (P30084) Enoyl-CoA hydratase, mitochondrial precursor (EC 4.2.1.17) (Short chain enoyl-CoA hydratase) (SCEH) (Enoyl-CoA hydratase 1) [MASS=31387]                                                                                                                 | 1.00 | 1.54  | 0.99 | 1.07 | *    | *     | 2 | 1.31  | 0.23 |
| EF1A1_HUMAN (P68104) Elongation factor 1-alpha 1 (EF-1-alpha-1) (Elongation factor 1 A-1) (eEF1A-1) (Elongation factor Tu) (EF-Tu) [MASS=50141]                                                                                                                              | 0.00 | 0.84  | 1.00 | 1.38 | 0.00 | *     | 2 | 1.11  | 0.27 |
| ENOG_HUMAN (P09104) Gamma-enolase (EC 4.2.1.11) (2-phospho-D-glycerate hydro-lyase) (Neural enolase) (Neuron-specific enolase) (NSE) (Enolase 2) [MASS=47137]                                                                                                                | 1.00 | 0.67  | *    | *    | 1.00 | 0.58  | 2 | 0.63  | 0.05 |
| ENP2_HUMAN (Q9Y5L3) Ectonucleoside triphosphate diphosphohydrolase 2 (EC 3.6.1.-) (NTPDase2) (Ecto-ATPase) (CD39 antigen-like 1) [MASS=53665]                                                                                                                                | 0.00 | 57.14 | *    | *    | 0.00 | 53.44 | 2 | 55.29 | 1.85 |
| ENPP1_HUMAN (P22413) Ectonucleotide pyrophosphatase/phosphodiesterase 1 (E-NPP 1) (Phosphodiesterase I/nucleotide pyrophosphatase 1) (Plasma-cell membrane glycoprotein PC-1) [Includes: Alkaline phosphodiesterase I (EC 3.1.4.1); Nucleotide pyrophosphatase [MASS=104924] | *    | *     | 0.00 | 1.06 | 0.00 | 0.10  | 2 | 0.58  | 0.48 |
| FACD2_HUMAN (Q9BXW9) Fanconi anemia group D2 protein (Protein FACD2) [MASS=166461]                                                                                                                                                                                           | 0.00 | 0.78  | *    | *    | 0.00 | 1.31  | 2 | 1.05  | 0.27 |
| FANCM_HUMAN (Q8IYD8) Fanconi anemia group M protein (EC 3.6.1.-) (ATP-dependent RNA helicase FANCM) (Protein FACM) (Fanconi anemia-associated polypeptide of 250 kDa) (FAAP250) (Protein Hef ortholog) [MASS=232190]                                                         | 0.00 | 1.42  | *    | *    | 0.00 | 1.91  | 2 | 1.67  | 0.25 |
| FBX40_HUMAN (Q9UH90) F-box only protein 40 (Muscle disease-related protein) [MASS=79663]                                                                                                                                                                                     | *    | *     | 0.00 | 0.96 | 0.00 | 0.83  | 2 | 0.90  | 0.07 |
| FKBP2_HUMAN (P26885) FK506-binding protein 2 precursor (EC 5.2.1.8) (Peptidyl-prolyl cis-trans isomerase) (PPLase) (Rotamase) (13 kDa FKBP) (FKBP-13) [MASS=15649]                                                                                                           | *    | *     | 0.71 | 0.93 | 0.74 | 1.21  | 2 | 1.07  | 0.14 |
| FREM1_HUMAN (Q5H8C1) FRAS1-related extracellular matrix protein 1 precursor (Protein QBRICK) [MASS=244122]                                                                                                                                                                   | *    | *     | 0.00 | 0.60 | 0.00 | 0.56  | 2 | 0.58  | 0.02 |
| FSCN1_HUMAN (Q16658) Fascin (Singed-like protein) (55 kDa actin-bundling protein) (p55) [MASS=54398]                                                                                                                                                                         | 1.00 | 0.81  | *    | *    | 0.41 | 0.93  | 2 | 0.87  | 0.06 |
| GDS1_HUMAN (P52306) Rap1 GTPase-GDP dissociation stimulator 1 (SMG P21 stimulatory GDP/GTP exchange protein) (SMG GDS protein) (Exchange factor smgGDS) [MASS=66403]                                                                                                         | 0.71 | 0.56  | 0.99 | 0.78 | *    | *     | 2 | 0.67  | 0.11 |



|                                                                                                                                                                                                    |      |      |      |      |      |      |   |      |      |
|----------------------------------------------------------------------------------------------------------------------------------------------------------------------------------------------------|------|------|------|------|------|------|---|------|------|
| GNAI1_HUMAN (P63096) Guanine nucleotide-binding protein G(i), alpha-1 subunit (Adenylate cyclase-inhibiting G alpha protein) [MASS=40230]                                                          | 1.00 | 0.68 | 0.00 | *    | 1.00 | 1.00 | 2 | 0.84 | 0.16 |
| GNAI2_HUMAN (P04899) Guanine nucleotide-binding protein G(i), alpha-2 subunit (Adenylate cyclase-inhibiting G alpha protein) [MASS=40319]                                                          | 0.86 | 0.59 | 1.00 | 0.76 | *    | *    | 2 | 0.68 | 0.08 |
| GPDM_HUMAN (P43304) Glycerol-3-phosphate dehydrogenase, mitochondrial precursor (EC 1.1.99.5) (GPD-M) (GPDH-M) (mtGPD) [MASS=80833]                                                                | 0.98 | 1.55 | *    | *    | 0.99 | 1.06 | 2 | 1.31 | 0.24 |
| GPM6B_HUMAN (Q13491) Neuronal membrane glycoprotein M6-b (M6b) [MASS=28989]                                                                                                                        | 0.98 | 0.49 | 0.23 | 0.51 | *    | *    | 2 | 0.50 | 0.01 |
| GRIA4_HUMAN (P48058) Glutamate receptor 4 precursor (GluR-4) (GluR4) (GluR-D) (Glutamate receptor ionotropic, AMPA 4) (AMPA-selective glutamate receptor 4) [MASS=100809]                          | 0.00 | 0.90 | 0.23 | 1.07 | *    | *    | 2 | 0.99 | 0.08 |
| GTR8_HUMAN (Q9NY64) Solute carrier family 2, facilitated glucose transporter member 8 (Glucose transporter type 8) (Glucose transporter type X1) [MASS=50793]                                      | *    | *    | 0.00 | 0.07 | 0.00 | 0.36 | 2 | 0.22 | 0.15 |
| HCDH_HUMAN (Q16836) Short chain 3-hydroxyacyl-CoA dehydrogenase, mitochondrial precursor (EC 1.1.1.35) (HCDH) (Medium and short chain L-3-hydroxyacyl-coenzyme A dehydrogenase) [MASS=34277]       | *    | *    | 0.00 | 1.40 | 0.00 | 1.24 | 2 | 1.32 | 0.08 |
| HD_HUMAN (P42858) Huntingtin (Huntington disease protein) (HD protein) [MASS=347857]                                                                                                               | *    | *    | 0.00 | 5.58 | 0.00 | 1.01 | 2 | 3.30 | 2.29 |
| HECD1_HUMAN (Q9ULT8) E3 ubiquitin-protein ligase HECTD1 (HECT domain-containing protein 1) (E3 ligase for inhibin receptor) (EULIR) [MASS=289593]                                                  | 0.00 | 1.23 | 0.00 | 2.09 | *    | *    | 2 | 1.66 | 0.43 |
| HINT1_HUMAN (P49773) Histidine triad nucleotide-binding protein 1 (Adenosine 5'-monophosphoramidase) (Protein kinase C inhibitor 1) (Protein kinase C-interacting protein 1) (PKCI-1) [MASS=13671] | 0.00 | 1.41 | *    | *    | 0.89 | 1.77 | 2 | 1.59 | 0.18 |
| HSF2B_HUMAN (O75031) Heat shock factor 2-binding protein [MASS=37644]                                                                                                                              | 0.00 | 1.46 | *    | *    | 0.00 | 0.91 | 2 | 1.19 | 0.28 |
| IF140_HUMAN (Q96RY7) Intraflagellar transport 140 homolog (WD and tetratricopeptide repeats protein 2) [MASS=165192]                                                                               | 0.00 | 1.40 | 0.00 | 0.63 | *    | *    | 2 | 1.02 | 0.39 |
| IGS21_HUMAN (Q96ID5) Immunoglobulin superfamily member 21 precursor [MASS=51835]                                                                                                                   | 0.52 | 0.73 | 0.99 | 0.36 | *    | *    | 2 | 0.55 | 0.19 |

|                                                                                                                                                                                                                                                                               |      |        |      |       |      |      |   |        |        |
|-------------------------------------------------------------------------------------------------------------------------------------------------------------------------------------------------------------------------------------------------------------------------------|------|--------|------|-------|------|------|---|--------|--------|
| IGSF8_HUMAN (Q969P0) Immunoglobulin superfamily member 8 precursor (CD81 partner 3) (Glu-Trp-Ile EWI motif-containing protein 2) (EWI-2) (Keratinocytes-associated transmembrane protein 4) (KCT-4) (LIR-D1) (CD316 antigen) [MASS=65034]                                     | 0.84 | 0.64   | 0.99 | 0.39  | *    | *    | 2 | 0.52   | 0.13   |
| IMB3_HUMAN (O00410) Importin beta-3 (Karyopherin beta-3) (Ran-binding protein 5) (RanBP5) [MASS=123498]                                                                                                                                                                       | 0.00 | 1.74   | *    | *     | 0.00 | 0.98 | 2 | 1.36   | 0.38   |
| IQEC2_HUMAN (Q5JU85) IQ motif and Sec7 domain-containing protein 2 [MASS=161735]                                                                                                                                                                                              | *    | *      | 0.00 | 2.18  | 0.00 | 1.07 | 2 | 1.63   | 0.56   |
| JHD1A_HUMAN (Q9Y2K7) JmjC domain-containing histone demethylation protein 1A (EC 1.14.11.-) (F-box/LRR-repeat protein 11) (F-box and leucine-rich repeat protein 11) (F-box protein FBL7) (F-box protein Lilina) [MASS=132792]                                                | 0.00 | 0.81   | 0.00 | 2.40  | *    | *    | 2 | 1.61   | 0.80   |
| K0196_HUMAN (Q12768) Protein KIAA0196 [MASS=134286]                                                                                                                                                                                                                           | 0.00 | 238.64 | *    | *     | 0.00 | 2.66 | 2 | 120.65 | 117.99 |
| K0427_HUMAN (O43310) Protein KIAA0427 [MASS=67586]                                                                                                                                                                                                                            | 0.00 | 0.98   | *    | *     | 0.00 | 1.87 | 2 | 1.43   | 0.45   |
| KCC2D_HUMAN (Q13557) Calcium/calmodulin-dependent protein kinase type II delta chain (EC 2.7.11.17) (CaM-kinase II delta chain) (CaM kinase II subunit delta) (CaMK-II subunit delta) [MASS=56297]                                                                            | 0.89 | 0.80   | 0.00 | *     | 1.00 | 1.62 | 2 | 1.21   | 0.41   |
| KCMA1_HUMAN (Q12791) Calcium-activated potassium channel subunit alpha 1 (Calcium-activated potassium channel, subfamily M subunit alpha 1) (Maxi K channel) (MaxiK) (BK channel) (K(VCA)alpha) (BKCA alpha) (KCa1.1) (Slowpoke homolog) (Slo homolog) (Slo-al) [MASS=137559] | 0.00 | 1.96   | 0.00 | 3.01  | *    | *    | 2 | 2.49   | 0.53   |
| KCNB2_HUMAN (Q92953) Potassium voltage-gated channel subfamily B member 2 (Voltage-gated potassium channel subunit Kv2.2) [MASS=102562]                                                                                                                                       | 0.00 | 0.08   | *    | *     | 0.00 | 1.01 | 2 | 0.55   | 0.47   |
| KI13B_HUMAN (Q9NQT8) Kinesin-like protein KIF13B (Kinesin-like protein GAKIN) [MASS=202665]                                                                                                                                                                                   | *    | *      | 0.00 | 15.05 | 0.00 | 5.70 | 2 | 10.38  | 4.68   |
| KIF6_HUMAN (Q6ZMV9) Kinesin-like protein KIF6 [MASS=92539]                                                                                                                                                                                                                    | 0.00 | 1.34   | 0.00 | 1.09  | *    | *    | 2 | 1.22   | 0.13   |
| KPCA_HUMAN (P17252) Protein kinase C alpha type (EC 2.7.11.13) (PKC-alpha) (PKC-A) [MASS=76632]                                                                                                                                                                               | 0.69 | 0.45   | *    | *     | 0.93 | 0.68 | 2 | 0.57   | 0.12   |
| L1CAM_HUMAN (P32004) Neural cell adhesion molecule L1 precursor (N-CAM L1) (CD171 antigen) [MASS=140002]                                                                                                                                                                      | 0.99 | 0.40   | 0.98 | 0.68  | *    | *    | 2 | 0.54   | 0.14   |
| LAMP1_HUMAN (P11279) Lysosome-associated membrane glycoprotein 1 precursor (LAMP-1) (CD107a antigen) [MASS=44773]                                                                                                                                                             | 1.00 | 0.74   | *    | *     | 1.00 | 0.68 | 2 | 0.71   | 0.03   |

|                                                                                                                                                                                                                                                                              |      |      |      |      |      |      |   |             |             |
|------------------------------------------------------------------------------------------------------------------------------------------------------------------------------------------------------------------------------------------------------------------------------|------|------|------|------|------|------|---|-------------|-------------|
| LETM1_HUMAN (O95202) Leucine zipper-EF-hand-containing transmembrane protein 1, mitochondrial precursor [MASS=83354]                                                                                                                                                         | 0.99 | 1.05 | *    | *    | 0.00 | 0.82 | 2 | <b>0.94</b> | <b>0.11</b> |
| LSAMP_HUMAN (Q13449) Limbic system-associated membrane protein precursor (LSAMP) [MASS=37308]                                                                                                                                                                                | 1.00 | 0.93 | 0.99 | 0.63 | *    | *    | 2 | <b>0.78</b> | <b>0.15</b> |
| M2OM_HUMAN (Q02978) Mitochondrial 2-oxoglutarate/malate carrier protein (OGCP) (Solute carrier family 25 member 11) [MASS=33930]                                                                                                                                             | 0.63 | 1.25 | 1.00 | 0.85 | *    | *    | 2 | <b>1.05</b> | <b>0.20</b> |
| MAP1A_HUMAN (P78559) Microtubule-associated protein 1A (MAP 1A) (Proliferation-related protein p80) [Contains: MAP1 light chain LC2] [MASS=306529]                                                                                                                           | 1.00 | 0.64 | *    | *    | 0.24 | 0.77 | 2 | <b>0.71</b> | <b>0.06</b> |
| MATR3_HUMAN (P43243) Matrin-3 [MASS=94623]                                                                                                                                                                                                                                   | 0.00 | 0.49 | *    | *    | 0.00 | 0.52 | 2 | <b>0.51</b> | <b>0.02</b> |
| MCCC2_HUMAN (Q9HCC0) Methylcrotonoyl-CoA carboxylase beta chain, mitochondrial precursor (EC 6.4.1.4) (3-Methylcrotonyl-CoA carboxylase 2) (MCCase subunit beta) (3-methylcrotonyl-CoA:carbon dioxide ligase subunit beta) (3-Methylcrotonyl-CoA carboxylase n) [MASS=61333] | 0.99 | 1.25 | 0.96 | 1.65 | *    | *    | 2 | <b>1.45</b> | <b>0.20</b> |
| MERL_HUMAN (P35240) Merlin (Moesin-ezrin-radixin-like protein) (Neurofibromin-2) (Schwannomin) (Schwannomerlin) [MASS=69690]                                                                                                                                                 | 0.00 | 0.81 | 0.00 | 0.84 | *    | *    | 2 | <b>0.83</b> | <b>0.02</b> |
| MFN2_HUMAN (O95140) Transmembrane GTPase MFN2 (EC 3.6.5.-) (Mitofusin-2) [MASS=86402]                                                                                                                                                                                        | 0.00 | 1.23 | 0.00 | 0.71 | *    | *    | 2 | <b>0.97</b> | <b>0.26</b> |
| MGR2_HUMAN (Q14416) Metabotropic glutamate receptor 2 precursor (mGluR2) [MASS=95567]                                                                                                                                                                                        | 0.00 | 3.52 | *    | *    | 0.00 | 2.81 | 2 | <b>3.17</b> | <b>0.36</b> |
| MICA2_HUMAN (O94851) Protein MICAL-2 [MASS=126688]                                                                                                                                                                                                                           | 0.00 | 0.32 | *    | *    | 0.00 | 0.86 | 2 | <b>0.59</b> | <b>0.27</b> |
| MMSA_HUMAN (Q02252) Methylmalonate-semialdehyde dehydrogenase [acylating], mitochondrial precursor (EC 1.2.1.27) (MMSDH) (Malonate-semialdehyde dehydrogenase [acylating]) (EC 1.2.1.18) [MASS=57839]                                                                        | 0.99 | 1.52 | *    | *    | 0.91 | 0.98 | 2 | <b>1.25</b> | <b>0.27</b> |
| MOG_HUMAN (Q16653) Myelin-oligodendrocyte glycoprotein precursor [MASS=28179]                                                                                                                                                                                                | 0.99 | 0.83 | *    | *    | 0.83 | 1.93 | 2 | <b>1.38</b> | <b>0.55</b> |
| MPCP_HUMAN (Q00325) Phosphate carrier protein, mitochondrial precursor (PTP) (Solute carrier family 25 member 3) [MASS=40095]                                                                                                                                                | 0.96 | 1.09 | 0.97 | 1.14 | *    | *    | 2 | <b>1.12</b> | <b>0.03</b> |
| MTCH2_HUMAN (Q9Y6C9) Mitochondrial carrier homolog 2 (Met-induced mitochondrial protein) [MASS=33331]                                                                                                                                                                        | 0.99 | 0.80 | 1.00 | 1.25 | *    | *    | 2 | <b>1.03</b> | <b>0.23</b> |
| MTMR6_HUMAN (Q9Y217) Myotubularin-related protein 6 (EC 3.1.3.-) [MASS=71953]                                                                                                                                                                                                | 0.00 | 0.34 | *    | *    | 0.00 | 0.28 | 2 | <b>0.31</b> | <b>0.03</b> |

|                                                                                                                                                                                                                                    |      |      |      |      |      |      |          |             |             |
|------------------------------------------------------------------------------------------------------------------------------------------------------------------------------------------------------------------------------------|------|------|------|------|------|------|----------|-------------|-------------|
| MYO5A_HUMAN (Q9Y411) Myosin-5A (Myosin Va) (Dilute myosin heavy chain, non-muscle) (Myosin heavy chain 12) (Myosin) [MASS=215420]                                                                                                  | 0.93 | 0.96 | *    | *    | 0.00 | 1.20 | <b>2</b> | <b>1.08</b> | <b>0.12</b> |
| NDRG2_HUMAN (Q9UN36) Protein NDRG2 (Protein Syld709613) [MASS=40798]                                                                                                                                                               | 1.00 | 0.49 | 0.84 | 0.67 | 0.69 | *    | <b>2</b> | <b>0.58</b> | <b>0.09</b> |
| NDUA5_HUMAN (Q16718) NADH dehydrogenase [ubiquinone] 1 alpha subcomplex subunit 5 (EC 1.6.5.3) (EC 1.6.99.3) (NADH-ubiquinone oxidoreductase 13 kDa-B subunit) (Complex I-13Kd-B) (CI-13Kd-B) (Complex I subunit B13) [MASS=13327] | 1.00 | 1.84 | 0.99 | 1.75 | *    | *    | <b>2</b> | <b>1.80</b> | <b>0.05</b> |
| NEGR1_HUMAN (Q7Z3B1) Neuronal growth regulator 1 precursor [MASS=38719]                                                                                                                                                            | 0.99 | 0.48 | *    | *    | 0.00 | 0.83 | <b>2</b> | <b>0.66</b> | <b>0.18</b> |
| NP1L4_HUMAN (Q99733) Nucleosome assembly protein 1-like 4 (Nucleosome assembly protein 2) (NAP2) [MASS=42823]                                                                                                                      | 0.73 | 0.85 | 0.25 | 0.73 | *    | *    | <b>2</b> | <b>0.79</b> | <b>0.06</b> |
| NPC1_HUMAN (O15118) Niemann-Pick C1 protein precursor [MASS=142166]                                                                                                                                                                | *    | *    | 0.00 | 2.47 | 0.00 | 0.58 | <b>2</b> | <b>1.53</b> | <b>0.95</b> |
| NU3M_HUMAN (P03897) NADH-ubiquinone oxidoreductase chain 3 (EC 1.6.5.3) (NADH dehydrogenase subunit 3) [MASS=13186]                                                                                                                | 0.95 | 0.88 | *    | *    | 0.96 | 0.80 | <b>2</b> | <b>0.84</b> | <b>0.04</b> |
| NUIM_HUMAN (O00217) NADH-ubiquinone oxidoreductase 23 kDa subunit, mitochondrial precursor (EC 1.6.5.3) (EC 1.6.99.3) (Complex I-23KD) (CI-23KD) (TYKY subunit) [MASS=23705]                                                       | 1.00 | 1.27 | 0.00 | 1.71 | *    | *    | <b>2</b> | <b>1.49</b> | <b>0.22</b> |
| OCTC_HUMAN (Q9UKG9) Peroxisomal carnitine O-octanoyltransferase (EC 2.3.1.137) (COT) [MASS=70178]                                                                                                                                  | *    | *    | 0.00 | 2.39 | 0.00 | 0.87 | <b>2</b> | <b>1.63</b> | <b>0.76</b> |
| ODBB_HUMAN (P21953) 2-oxoisovalerate dehydrogenase subunit beta, mitochondrial precursor (EC 1.2.4.4) (Branched-chain alpha-keto acid dehydrogenase E1 component beta chain) (BCKDH E1-beta) [MASS=43122]                          | *    | *    | 0.00 | 1.10 | 0.00 | 1.44 | <b>2</b> | <b>1.27</b> | <b>0.17</b> |
| ODO1_HUMAN (Q02218) 2-oxoglutarate dehydrogenase E1 component, mitochondrial precursor (EC 1.2.4.2) (Alpha-ketoglutarate dehydrogenase) [MASS=113475]                                                                              | 0.75 | 1.14 | 0.00 | 1.01 | *    | *    | <b>2</b> | <b>1.08</b> | <b>0.07</b> |
| ODPA_HUMAN (P08559) Pyruvate dehydrogenase E1 component alpha subunit, somatic form, mitochondrial precursor (EC 1.2.4.1) (PDHE1-A type I) [MASS=43295]                                                                            | 1.00 | 1.11 | 0.00 | *    | 1.00 | 1.60 | <b>2</b> | <b>1.36</b> | <b>0.25</b> |

|                                                                                                                                                                                                                                                                             |      |       |      |      |      |      |   |       |       |
|-----------------------------------------------------------------------------------------------------------------------------------------------------------------------------------------------------------------------------------------------------------------------------|------|-------|------|------|------|------|---|-------|-------|
| ODPX_HUMAN (O00330) Pyruvate dehydrogenase protein X component, mitochondrial precursor (Dihydrolipoamide dehydrogenase binding protein of pyruvate dehydrogenase complex) (Lipoyl-containing pyruvate dehydrogenase complex component X) (E3-binding protein) [MASS=54122] | *    | *     | 0.97 | 1.86 | 0.99 | 1.78 | 2 | 1.82  | 0.04  |
| OMGP_HUMAN (P23515) Oligodendrocyte-myelin glycoprotein precursor [MASS=49608]                                                                                                                                                                                              | 0.97 | 0.54  | *    | *    | 0.93 | 1.00 | 2 | 0.77  | 0.23  |
| OR6A2_HUMAN (O95222) Olfactory receptor 6A2 (Olfactory receptor 11-55) (OR11-55) (hP2 olfactory receptor) [MASS=36154]                                                                                                                                                      | 0.00 | 25.20 | *    | *    | 0.00 | 0.82 | 2 | 13.01 | 12.19 |
| PACN1_HUMAN (Q9BY11) Protein kinase C and casein kinase substrate in neurons protein 1 [MASS=50965]                                                                                                                                                                         | 0.52 | 0.63  | *    | *    | 1.00 | 0.49 | 2 | 0.56  | 0.07  |
| PADI3_HUMAN (Q9ULW8) Protein-arginine deiminase type-3 (EC 3.5.3.15) (Protein-arginine deiminase type III) (Peptidylarginine deiminase III) [MASS=74743]                                                                                                                    | 0.00 | 0.01  | *    | *    | 0.00 | 0.47 | 2 | 0.24  | 0.23  |
| PANK4_HUMAN (Q9NVE7) Pantothenate kinase 4 (EC 2.7.1.33) (Pantothenic acid kinase 4) (hPanK4) [MASS=85990]                                                                                                                                                                  | *    | *     | 0.00 | 3.12 | 0.00 | 3.11 | 2 | 3.12  | 0.01  |
| PARP2_HUMAN (Q9UGN5) Poly [ADP-ribose] polymerase 2 (EC 2.4.2.30) (PARP-2) (NAD(+) ADP-ribosyltransferase 2) (Poly[ADP-ribose] synthetase 2) (pADPRT-2) (hPARP-2) [MASS=66205]                                                                                              | *    | *     | 0.00 | 0.50 | 0.00 | 0.52 | 2 | 0.51  | 0.01  |
| PCYOX_HUMAN (Q9UHG3) Prenylcysteine oxidase precursor (EC 1.8.3.5) (PCL1) [MASS=56611]                                                                                                                                                                                      | *    | *     | 0.00 | 3.83 | 0.00 | 0.88 | 2 | 2.36  | 1.48  |
| PECI_HUMAN (O75521) Peroxisomal 3,2-trans-enoyl-CoA isomerase (EC 5.3.3.8) (Dodecenoyl-CoA isomerase) (Delta(3),delta(2)-enoyl-CoA isomerase) (D3,D2-enoyl-CoA isomerase) (DBI-related protein 1) (DRS-1) (Hepatocellular carcinoma-associated antigen 88) (NY [MASS=39609] | 0.21 | 0.82  | 0.99 | 0.90 | *    | *    | 2 | 0.86  | 0.04  |
| PGAM1_HUMAN (P18669) Phosphoglycerate mutase 1 (EC 5.4.2.1) (EC 5.4.2.4) (EC 3.1.3.13) (Phosphoglycerate mutase isozyme B) (PGAM-B) (BPG-dependent PGAM 1) [MASS=28673]                                                                                                     | 1.00 | 0.94  | 1.00 | 1.26 | *    | *    | 2 | 1.10  | 0.16  |
| PGBM_HUMAN (P98160) Basement membrane-specific heparan sulfate proteoglycan core protein precursor (HSPG) (Perlecan) (PLC) [MASS=468822]                                                                                                                                    | 0.00 | 0.88  | *    | *    | 0.00 | 0.70 | 2 | 0.79  | 0.09  |
| PGCB_HUMAN (Q96GW7) Brevican core protein precursor (Brain-enriched hyaluronan-binding protein) (Protein BEHAB) [MASS=99117]                                                                                                                                                | 0.99 | 0.49  | 0.88 | 0.87 | *    | *    | 2 | 0.68  | 0.19  |

|                                                                                                                                                                     |      |      |      |      |      |       |          |             |             |
|---------------------------------------------------------------------------------------------------------------------------------------------------------------------|------|------|------|------|------|-------|----------|-------------|-------------|
| PKHD1_HUMAN (Q8TCZ9) Polycystic kidney and hepatic disease 1 precursor (Fibrocystin) (Polyductin) (Tigmin) [MASS=446699]                                            | *    | *    | 0.00 | 1.00 | 0.00 | 0.71  | <b>2</b> | <b>0.86</b> | <b>0.15</b> |
| PKP1_HUMAN (Q13835) Plakophilin-1 (Band-6 protein) (B6P) [MASS=82860]                                                                                               | 0.00 | 1.95 | *    | *    | 0.00 | 11.83 | <b>2</b> | <b>6.89</b> | <b>4.94</b> |
| PP1A_HUMAN (P62136) Serine/threonine-protein phosphatase PP1-alpha catalytic subunit (EC 3.1.3.16) (PP-1A) [MASS=37512]                                             | 0.69 | 0.58 | *    | *    | 0.96 | 1.19  | <b>2</b> | <b>0.89</b> | <b>0.31</b> |
| PP2AA_HUMAN (P67775) Serine/threonine-protein phosphatase 2A catalytic subunit alpha isoform (EC 3.1.3.16) (PP2A-alpha) (Replication protein C) (RP-C) [MASS=35594] | *    | *    | 0.82 | 1.44 | 1.00 | 0.59  | <b>2</b> | <b>1.02</b> | <b>0.43</b> |
| PPIA_HUMAN (P62937) Peptidyl-prolyl cis-trans isomerase A (EC 5.2.1.8) (PPIase A) (Rotamase A) (Cyclophilin A) (Cyclosporin A-binding protein) [MASS=17881]         | 1.00 | 0.96 | 1.00 | 0.69 | *    | *     | <b>2</b> | <b>0.83</b> | <b>0.14</b> |
| PRI2_HUMAN (P49643) DNA primase large subunit (EC 2.7.7.-) (DNA primase 58 kDa subunit) (p58) [MASS=58806]                                                          | *    | *    | 0.38 | 0.85 | 0.00 | 1.12  | <b>2</b> | <b>0.99</b> | <b>0.13</b> |
| PTPRZ_HUMAN (P23471) Receptor-type tyrosine-protein phosphatase zeta precursor (EC 3.1.3.48) (R-PTP-zeta) [MASS=254528]                                             | 0.71 | 0.41 | 0.89 | 0.43 | *    | *     | <b>2</b> | <b>0.42</b> | <b>0.01</b> |
| PURA_HUMAN (Q00577) Transcriptional activator protein Pur-alpha (Purine-rich single-stranded DNA-binding protein alpha) [MASS=34911]                                | 1.00 | 1.63 | *    | *    | 0.87 | 1.52  | <b>2</b> | <b>1.58</b> | <b>0.06</b> |
| RAG1_HUMAN (P15918) V(D)J recombination-activating protein 1 (RAG-1) (RING finger protein 74) [MASS=119115]                                                         | *    | *    | 0.00 | 0.36 | 0.00 | 1.18  | <b>2</b> | <b>0.77</b> | <b>0.41</b> |
| RASF4_HUMAN (Q9H2L5) Ras association domain-containing protein 4 [MASS=36748]                                                                                       | 0.00 | 0.17 | 0.00 | 0.25 | *    | *     | <b>2</b> | <b>0.21</b> | <b>0.04</b> |
| RCC2_HUMAN (Q9P258) Protein RCC2 (Telophase disk protein of 60 kDa) (RCC1-like protein TD-60) [MASS=56084]                                                          | 0.00 | 0.40 | *    | *    | 0.00 | 1.44  | <b>2</b> | <b>0.92</b> | <b>0.52</b> |
| RHOB_HUMAN (P62745) Rho-related GTP-binding protein RhoB precursor (H6) [MASS=22123]                                                                                | 0.96 | 0.71 | *    | *    | 0.94 | 0.27  | <b>2</b> | <b>0.49</b> | <b>0.22</b> |
| RL4_HUMAN (P36578) 60S ribosomal protein L4 (L1) [MASS=47566]                                                                                                       | 0.95 | 1.41 | 0.99 | 1.90 | *    | *     | <b>2</b> | <b>1.66</b> | <b>0.25</b> |
| RTN1_HUMAN (Q16799) Reticulon-1 (Neuroendocrine-specific protein) [MASS=83617]                                                                                      | 0.99 | 0.92 | *    | *    | 0.89 | 1.85  | <b>2</b> | <b>1.39</b> | <b>0.47</b> |
| RYR1_HUMAN (P21817) Ryanodine receptor 1 (Skeletal muscle-type ryanodine receptor) (RyR1) (RYR-1) (Skeletal muscle calcium release channel) [MASS=565172]           | 0.00 | 0.62 | *    | *    | 0.00 | 1.99  | <b>2</b> | <b>1.31</b> | <b>0.69</b> |

|                                                                                                                                                                                                                                                 |      |      |      |      |      |      |          |             |             |
|-------------------------------------------------------------------------------------------------------------------------------------------------------------------------------------------------------------------------------------------------|------|------|------|------|------|------|----------|-------------|-------------|
| RYR3_HUMAN (Q15413) Ryanodine receptor 3 (Brain-type ryanodine receptor) (RyR3) (RYR-3) (Brain ryanodine receptor-calcium release channel) [MASS=551928]                                                                                        | *    | *    | 0.00 | 0.52 | 0.00 | 0.70 | <b>2</b> | <b>0.61</b> | <b>0.09</b> |
| S14L1_HUMAN (Q92503) SEC14-like protein 1 [MASS=81277]                                                                                                                                                                                          | 0.00 | 0.57 | 0.00 | 1.27 | *    | *    | <b>2</b> | <b>0.92</b> | <b>0.35</b> |
| S3TC2_HUMAN (Q8TF17) SH3 domain and tetratricopeptide repeats-containing protein 2 [MASS=144776]                                                                                                                                                | *    | *    | 0.00 | 3.61 | 0.00 | 0.76 | <b>2</b> | <b>2.19</b> | <b>1.43</b> |
| SAM50_HUMAN (Q9Y512) Sorting and assembly machinery component 50 homolog [MASS=51962]                                                                                                                                                           | *    | *    | 1.00 | 0.86 | 1.00 | 1.07 | <b>2</b> | <b>0.97</b> | <b>0.10</b> |
| SCRB1_HUMAN (Q8WTV0) Scavenger receptor class B member 1 (SRB1) (SR-BI) (CD36 antigen-like 1) (CD36 and LIMPII analogous 1) (CLA-1) (Collagen type I receptor, thrombospondin receptor-like 1) [MASS=60878]                                     | 0.00 | 0.28 | 0.00 | 0.31 | *    | *    | <b>2</b> | <b>0.30</b> | <b>0.01</b> |
| SCRN1_HUMAN (Q12765) Secernin-1 [MASS=46382]                                                                                                                                                                                                    | 0.99 | 0.62 | 0.99 | 0.73 | *    | *    | <b>2</b> | <b>0.68</b> | <b>0.05</b> |
| SFXN1_HUMAN (Q9H9B4) Sideroflexin-1 (Tricarboxylate carrier protein) (TCC) [MASS=35488]                                                                                                                                                         | 0.00 | *    | 0.79 | 0.92 | 0.67 | 1.11 | <b>2</b> | <b>1.02</b> | <b>0.09</b> |
| SIRT2_HUMAN (Q8IXJ6) NAD-dependent deacetylase sirtuin-2 (EC 3.5.1.-) (SIR2-like) (SIR2-like protein 2) [MASS=43182]                                                                                                                            | 0.99 | 1.18 | 0.99 | 0.50 | *    | *    | <b>2</b> | <b>0.84</b> | <b>0.34</b> |
| SODC_HUMAN (P00441) Superoxide dismutase [Cu-Zn] (EC 1.15.1.1) [MASS=15804]                                                                                                                                                                     | *    | *    | 0.99 | 0.71 | 1.00 | 0.78 | <b>2</b> | <b>0.75</b> | <b>0.04</b> |
| SPTB1_HUMAN (P11277) Spectrin beta chain, erythrocyte (Beta-I spectrin) [MASS=246189]                                                                                                                                                           | 0.98 | 0.74 | 0.97 | 0.95 | *    | *    | <b>2</b> | <b>0.85</b> | <b>0.11</b> |
| SSDH_HUMAN (P51649) Succinate semialdehyde dehydrogenase, mitochondrial precursor (EC 1.2.1.24) (NAD(+)-dependent succinic semialdehyde dehydrogenase) [MASS=57214]                                                                             | 1.00 | 2.02 | 0.00 | *    | 1.00 | 1.46 | <b>2</b> | <b>1.74</b> | <b>0.28</b> |
| STS_HUMAN (P08842) Steryl-sulfatase precursor (EC 3.1.6.2) (Steroid sulfatase) (Steryl-sulfate sulfohydrolase) (Arylsulfatase C) (ASC) [MASS=65492]                                                                                             | *    | *    | 0.00 | 6.52 | 0.66 | 0.52 | <b>2</b> | <b>3.52</b> | <b>3.00</b> |
| SUCA_HUMAN (P53597) Succinyl-CoA ligase [GDP-forming] alpha-chain, mitochondrial precursor (EC 6.2.1.4) (Succinyl-CoA synthetase, alpha chain) (SCS-alpha) [MASS=35047]                                                                         | 0.00 | 1.00 | *    | *    | 0.47 | 1.48 | <b>2</b> | <b>1.24</b> | <b>0.24</b> |
| SUCB1_HUMAN (Q9P2R7) Succinyl-CoA ligase [ADP-forming] beta-chain, mitochondrial precursor (EC 6.2.1.5) (Succinyl-CoA synthetase, betaA chain) (SCS-betaA) (ATP-specific succinyl-CoA synthetase subunit beta) (NY-REN-39 antigen) [MASS=50317] | *    | *    | 0.94 | 5.60 | 0.95 | 3.12 | <b>2</b> | <b>4.36</b> | <b>1.24</b> |

|                                                                                                                                                                                                                   |      |       |      |      |      |      |   |      |      |
|-------------------------------------------------------------------------------------------------------------------------------------------------------------------------------------------------------------------|------|-------|------|------|------|------|---|------|------|
| SYEP_HUMAN (P07814) Bifunctional aminoacyl-tRNA synthetase [Includes: Glutamyl-tRNA synthetase (EC 6.1.1.17) (Glutamate--tRNA ligase); Prolyl-tRNA synthetase (EC 6.1.1.15) (Proline--tRNA ligase)] [MASS=163025] | *    | *     | 0.99 | 1.12 | 1.00 | 1.47 | 2 | 1.30 | 0.18 |
| SYGP1_HUMAN (Q96PV0) Ras GTPase-activating protein SynGAP (Synaptic Ras-GTPase-activating protein 1) (Synaptic Ras-GAP 1) (Neuronal RasGAP) [MASS=146675]                                                         | *    | *     | 0.67 | 0.79 | 0.97 | 1.04 | 2 | 0.92 | 0.13 |
| SYIM_HUMAN (Q9NSE4) Isoleucyl-tRNA synthetase, mitochondrial precursor (EC 6.1.1.5) (Isoleucine--tRNA ligase) (IleRS) [MASS=113791]                                                                               | 0.99 | 1.40  | 1.00 | 1.86 | *    | *    | 2 | 1.63 | 0.23 |
| TBA3_HUMAN (Q71U36) Tubulin alpha-3 chain (Alpha-tubulin 3) (Tubulin B-alpha-1) [MASS=50135]                                                                                                                      | 0.00 | *     | 1.00 | 1.07 | 1.00 | 1.02 | 2 | 1.05 | 0.03 |
| TBA6_HUMAN (Q9BQE3) Tubulin alpha-6 chain (Alpha-tubulin 6) [MASS=49895]                                                                                                                                          | 1.00 | 0.82  | 1.00 | 0.51 | *    | *    | 2 | 0.67 | 0.16 |
| TCPH_HUMAN (Q99832) T-complex protein 1 subunit eta (TCP-1-eta) (CCT-eta) (HIV-1 Nef-interacting protein) [MASS=59366]                                                                                            | *    | *     | 0.99 | 0.80 | 0.72 | 1.74 | 2 | 1.27 | 0.47 |
| TCPQ_HUMAN (P50990) T-complex protein 1 subunit theta (TCP-1-theta) (CCT-theta) (NY-REN-15 antigen) [MASS=59489]                                                                                                  | 0.00 | 0.47  | 0.92 | 0.46 | *    | *    | 2 | 0.47 | 0.00 |
| TDG_HUMAN (Q13569) G/T mismatch-specific thymine DNA glycosylase (EC 3.2.2.-) [MASS=46053]                                                                                                                        | *    | *     | 0.00 | 0.79 | 0.59 | 0.65 | 2 | 0.72 | 0.07 |
| TEBP_HUMAN (Q15185) Prostaglandin E synthase 3 (EC 5.3.99.3) (Cytosolic prostaglandin E2 synthase) (cPGES) (Telomerase-binding protein p23) (Hsp90 co-chaperone) (Progesterone receptor complex p23) [MASS=18697] | 1.00 | 0.71  | 0.99 | 0.84 | *    | *    | 2 | 0.78 | 0.07 |
| TGT_HUMAN (Q9BXR0) Queuine tRNA-ribosyltransferase (EC 2.4.2.29) (tRNA-guanine transglycosylase) (Guanine insertion enzyme) [MASS=42492]                                                                          | 0.00 | 13.58 | *    | *    | 0.00 | 2.55 | 2 | 8.07 | 5.52 |
| THIM_HUMAN (P42765) 3-ketoacyl-CoA thiolase, mitochondrial (EC 2.3.1.16) (Beta-ketothiolase) (Acetyl-CoA acyltransferase) (Mitochondrial 3-oxoacyl-CoA thiolase) (T1) [MASS=41924]                                | 0.72 | 1.48  | 1.00 | 1.69 | *    | *    | 2 | 1.59 | 0.11 |
| THRB_HUMAN (P00734) Prothrombin precursor (EC 3.4.21.5) (Coagulation factor II) [Contains: Activation peptide fragment 1; Activation peptide fragment 2; Thrombin light chain; Thrombin heavy chain] [MASS=70036] | 0.00 | 1.57  | 0.00 | 0.89 | *    | *    | 2 | 1.23 | 0.34 |
| TIM13_HUMAN (Q9Y5L4) Mitochondrial import inner membrane translocase subunit Tim13 [MASS=10500]                                                                                                                   | 1.00 | 0.84  | 1.00 | 1.36 | *    | *    | 2 | 1.10 | 0.26 |



|                                                                                                                                                                                                                                                                             |      |      |      |      |      |      |   |      |      |
|-----------------------------------------------------------------------------------------------------------------------------------------------------------------------------------------------------------------------------------------------------------------------------|------|------|------|------|------|------|---|------|------|
| TOM70_HUMAN (O94826) Mitochondrial precursor proteins import receptor (Translocase of outer membrane TOM70) [MASS=67454]                                                                                                                                                    | 1.00 | 0.92 | 1.00 | 0.69 | *    | *    | 2 | 0.81 | 0.12 |
| TOP3B_HUMAN (O95985) DNA topoisomerase 3-beta-1 (EC 5.99.1.2) (DNA topoisomerase III beta-1) [MASS=96661]                                                                                                                                                                   | *    | *    | 0.00 | 1.07 | 0.00 | 0.67 | 2 | 0.87 | 0.20 |
| TPIS_HUMAN (P60174) Triosephosphate isomerase (EC 5.3.1.1) (TIM) (Triose-phosphate isomerase) [MASS=26538]                                                                                                                                                                  | 1.00 | 0.59 | 1.00 | 0.61 | *    | *    | 2 | 0.60 | 0.01 |
| TRPV4_HUMAN (Q9HBA0) Transient receptor potential cation channel subfamily V member 4 (TrpV4) (osm-9-like TRP channel 4) (OTRPC4) (Vanilloid receptor-like channel 2) (Vanilloid receptor-like protein 2) (VRL-2) (Vanilloid receptor-related osmotically-acti [MASS=98281] | 0.00 | 0.88 | *    | *    | 0.00 | 0.67 | 2 | 0.78 | 0.11 |
| TYRO3_HUMAN (Q06418) Tyrosine-protein kinase receptor TYRO3 precursor (EC 2.7.10.1) (Tyrosine-protein kinase RSE) (Tyrosine-protein kinase SKY) (Tyrosine-protein kinase DTK) (Protein-tyrosine kinase byk) [MASS=96905]                                                    | 0.00 | 2.11 | *    | *    | 0.41 | 4.06 | 2 | 3.09 | 0.97 |
| UBE1_HUMAN (P22314) Ubiquitin-activating enzyme E1 (A1S9 protein) [MASS=117848]                                                                                                                                                                                             | 0.99 | 1.30 | 0.94 | 1.01 | *    | *    | 2 | 1.16 | 0.15 |
| UBE3C_HUMAN (Q15386) Ubiquitin-protein ligase E3C (EC 6.3.2.-) [MASS=123922]                                                                                                                                                                                                | 0.00 | 1.47 | *    | *    | 0.00 | 0.27 | 2 | 0.87 | 0.60 |
| UBP28_HUMAN (Q96RU2) Ubiquitin carboxyl-terminal hydrolase 28 (EC 3.1.2.15) (Ubiquitin thioesterase 28) (Ubiquitin-specific-processing protease 28) (Deubiquitinating enzyme 28) [MASS=122490]                                                                              | *    | *    | 0.00 | 1.52 | 0.00 | 0.83 | 2 | 1.18 | 0.35 |
| UBP38_HUMAN (Q8NB14) Ubiquitin carboxyl-terminal hydrolase 38 (EC 3.1.2.15) (Ubiquitin thioesterase 38) (Ubiquitin-specific-processing protease 38) (Deubiquitinating enzyme 38) (HP43.8KD) [MASS=116545]                                                                   | *    | *    | 0.23 | 1.53 | 0.00 | 0.59 | 2 | 1.06 | 0.47 |
| UBP5_HUMAN (P45974) Ubiquitin carboxyl-terminal hydrolase 5 (EC 3.1.2.15) (Ubiquitin thioesterase 5) (Ubiquitin-specific-processing protease 5) (Deubiquitinating enzyme 5) (Isopeptidase T) [MASS=95786]                                                                   | 1.00 | 0.73 | *    | *    | 1.00 | 0.69 | 2 | 0.71 | 0.02 |
| UBR2_HUMAN (Q8I WV8) Ubiquitin-protein ligase E3 component N-recognin-2 (EC 6.-.-) (Ubiquitin-protein ligase E3-alpha-2) (Ubiquitin-protein ligase E3-alpha-II) [MASS=200537]                                                                                               | 0.00 | 1.09 | *    | *    | 0.00 | 0.86 | 2 | 0.98 | 0.12 |

|                                                                                                                                                                                                                                 |      |      |      |      |      |      |          |             |             |
|---------------------------------------------------------------------------------------------------------------------------------------------------------------------------------------------------------------------------------|------|------|------|------|------|------|----------|-------------|-------------|
| VAPA_HUMAN (Q9P0L0) Vesicle-associated membrane protein-associated protein A (VAMP-associated protein A) (VAMP-A) (VAP-A) (33 kDa Vamp-associated protein) (VAP-33) [MASS=27317]                                                | *    | *    | 0.00 | 0.99 | 0.00 | 0.30 | <b>2</b> | <b>0.65</b> | <b>0.35</b> |
| VPS29_HUMAN (Q9UBQ0) Vacuolar protein sorting 29 (Vesicle protein sorting 29) (hVPS29) (PEP11) [MASS=20506]                                                                                                                     | *    | *    | 0.99 | 0.51 | 0.00 | 0.91 | <b>2</b> | <b>0.71</b> | <b>0.20</b> |
| XPO5_HUMAN (Q9HAV4) Exportin-5 (Exp5) (Ran-binding protein 21) [MASS=136310]                                                                                                                                                    | 0.00 | 2.38 | *    | *    | 0.00 | 0.89 | <b>2</b> | <b>1.64</b> | <b>0.75</b> |
| XPP2_HUMAN (O43895) Xaa-Pro aminopeptidase 2 precursor (EC 3.4.11.9) (X-Pro aminopeptidase 2) (Membrane-bound aminopeptidase P) (Membrane-bound APP) (Membrane-bound AmP) (mAmP) (Aminoacylproline aminopeptidase) [MASS=75624] | *    | *    | 0.38 | 0.20 | 0.00 | 0.69 | <b>2</b> | <b>0.45</b> | <b>0.25</b> |
| ZN294_HUMAN (O94822) Zinc finger protein 294 [MASS=200534]                                                                                                                                                                      | 0.00 | 1.13 | 0.00 | 0.34 | *    | *    | <b>2</b> | <b>0.74</b> | <b>0.40</b> |
| ZNF6_HUMAN (Q9Y462) Zinc finger protein 6 [MASS=87209]                                                                                                                                                                          | 0.44 | 1.76 | *    | *    | 0.59 | 1.12 | <b>2</b> | <b>1.44</b> | <b>0.32</b> |
| ZNF85_HUMAN (Q03923) Zinc finger protein 85 (Zinc finger protein HPF4) (HTF1) [MASS=68718]                                                                                                                                      | 0.27 | 1.25 | 0.00 | 0.56 | *    | *    | <b>2</b> | <b>0.91</b> | <b>0.35</b> |

**Table 3. MCI mitochondrial samples  
Experiment 1**

| Description                                                                                                                                                                                                                                   | A = Protein Score |       |      |      | E = XPress Peptides |   |   |                                     | Peptide Sequence | H |
|-----------------------------------------------------------------------------------------------------------------------------------------------------------------------------------------------------------------------------------------------|-------------------|-------|------|------|---------------------|---|---|-------------------------------------|------------------|---|
|                                                                                                                                                                                                                                               | A                 | B     | C    | D    | E                   | F | G |                                     |                  |   |
| 1433B_HUMAN (P31946) 14-3-3 protein beta/alpha (Protein kinase C inhibitor protein 1) (KCIP-1) (Protein 1054) [MASS=27951]                                                                                                                    | 0.37              | 26.12 | 1.52 | 0.00 | 1                   | 3 | 3 | IEAELQDIC[339]NDVLELLDKYLIPNATQPESK | 1                |   |
|                                                                                                                                                                                                                                               |                   |       |      |      |                     |   | 2 | IEAELQDIC[339]NDVLELLDK             | 1                |   |
|                                                                                                                                                                                                                                               |                   |       |      |      |                     |   | 3 | LAEQAERYDDMAAMK                     | 1                |   |
| 1433E_HUMAN (P62258) 14-3-3 protein epsilon (14-3-3E) [MASS=29174]                                                                                                                                                                            | 0.58              | 16.08 | 0.49 | 0.00 | 1                   | 2 | 2 | LIC[330]C[330]DILDVLDK              | 1                |   |
|                                                                                                                                                                                                                                               |                   |       |      |      |                     |   | 3 | KEAAENSLVAYKAASDIAMTELPPTHPIR       | 1                |   |
| 1433F_HUMAN (Q04917) 14-3-3 protein eta (Protein AS1) [MASS=28087]                                                                                                                                                                            | 0.61              | 15.51 | 0.85 | 0.29 | 2                   | 2 | 2 | FLIKNC[330]NDFQYESKVFYLK            | 1                |   |
|                                                                                                                                                                                                                                               |                   |       |      |      |                     |   | 3 | ELETVC[339]NDVLSLLDKFLIK            | 1                |   |
|                                                                                                                                                                                                                                               |                   |       |      |      |                     |   | 3 | ELETVC[330]NDVLSLLDKFLIK            | 1                |   |
| 1433G_HUMAN (P61981) 14-3-3 protein gamma (Protein kinase C inhibitor protein 1) (KCIP-1) [MASS=28171]                                                                                                                                        | 1.00              | 18.29 | 0.76 | 0.05 | 5                   | 2 | 3 | LGLALNYSVFYIEIQNAPEQAC[339]HLAK     | 1                |   |
|                                                                                                                                                                                                                                               |                   |       |      |      |                     |   | 3 | ELEAVC[330]QDVLSELLDNLYIK           | 1                |   |
|                                                                                                                                                                                                                                               |                   |       |      |      |                     |   | 2 | ELEAVC[339]QDVLSELLDNLYIK           | 2                |   |
| 1433T_HUMAN (P27348) 14-3-3 protein theta (14-3-3 protein tau) (14-3-3 protein T-cell) (HS1 protein) [MASS=27764]                                                                                                                             | 0.96              | 16.33 | 0.98 | 0.00 | 1                   | 2 | 2 | ELEAVC[330]QDVLSELLDNLYIK           | 1                |   |
|                                                                                                                                                                                                                                               |                   |       |      |      |                     |   | 2 | LAEQAERYDDMATC[330]M[147]K          | 1                |   |
| 1433Z_HUMAN (P63104) 14-3-3 protein zeta/delta (Protein kinase C inhibitor protein 1) (KCIP-1) [MASS=27745]                                                                                                                                   | 1.00              | 12.24 | 0.75 | 0.09 | 3                   | 2 | 3 | SIC[330]TTVLELLDKYLIANATNPESK       | 1                |   |
|                                                                                                                                                                                                                                               |                   |       |      |      |                     |   | 2 | IETELRDIC[339]NDVLSLLEK             | 1                |   |
|                                                                                                                                                                                                                                               |                   |       |      |      |                     |   | 2 | DIC[339]NDVLSLLEK                   | 1                |   |
| 2AAA_HUMAN (P30153) Serine/threonine-protein phosphatase 2A 65 kDa regulatory subunit A alpha isoform (PP2A, subunit A, PR65-alpha isoform) (PP2A, subunit A, R1-alpha isoform) (Medium tumor antigen-associated 61 kDa protein) [MASS=65092] | 1.00              | 11.56 | 0.91 | 0.13 | 2                   | 4 | 3 | IETELRDIC[330]NDVLSLLEK             | 1                |   |
|                                                                                                                                                                                                                                               |                   |       |      |      |                     |   | 2 | QAAEDK                              | 2                |   |
|                                                                                                                                                                                                                                               |                   |       |      |      |                     |   | 2 | LAIIEMYPLLAGQLGVEFFDEK              | 1                |   |
| 5NTC_HUMAN (P49902) Cytosolic purine 5'-nucleotidase (EC 3.1.3.5) (5'-nucleotidase cytosolic II) [MASS=64969]                                                                                                                                 | 0.00              | 2.50  | 7.25 | 0.00 | 1                   | 1 | 2 | LNIISNLDLC[339]VNEVIGIR             | 1                |   |
|                                                                                                                                                                                                                                               |                   |       |      |      |                     |   | 3 | DNTIEHLLPLFLAQLKDEC[339]PEVR        | 1                |   |
|                                                                                                                                                                                                                                               |                   |       |      |      |                     |   | 2 | C[339]FGFDMDYTLAVYK                 | 1                |   |

|                                                                                                                                                                                                                 |      |       |      |      |   |   |                                                                                                                                                          |                           |
|-----------------------------------------------------------------------------------------------------------------------------------------------------------------------------------------------------------------|------|-------|------|------|---|---|----------------------------------------------------------------------------------------------------------------------------------------------------------|---------------------------|
| 6PGD_HUMAN (P52209) 6-phosphogluconate dehydrogenase, decarboxylating (EC 1.1.1.44) [MASS=53008]                                                                                                                | 0.00 | 14.73 | 0.97 | 0.00 | 1 | 4 | 3 TELDSFLIEITANILKFQDTDGKHELLPK<br>3 IISYAQGF[M147]LLR<br>2 MVHNGIEYGDMLIC[330]EAYHLM[147]K<br>2 C[330]LSSLKDER                                          | 1<br>1<br>1<br>1          |
| A20A1_HUMAN (Q5TYW2) Ankyrin repeat domain-containing protein 20A1 [MASS=94047]                                                                                                                                 | *    | 1.70  | *    | *    | * | 1 | 2 DVSVQVEM[147]SSAISK<br><br>2 NLDKEYLPIGGLAEFC[330]K                                                                                                    | 1<br><br>2                |
| AATM_HUMAN (P00505) Aspartate aminotransferase, mitochondrial precursor (EC 2.6.1.1) (Transaminase A) (Glutamate oxaloacetate transaminase 2) [MASS=47475]                                                      | 1.00 | 13.49 | 1.32 | 0.14 | 6 | 4 | 1 VGAFTM[147]VC[339]K<br>2 VGAFTM[147]VC[339]K<br>2 TC[339]GDFDTGAVEDISK<br><br>2 HFIEQGINVC[339]LC[339]QSYAK<br>3 KLSTAM[147]ALIGPPVFLDEPTTGM[147]DPKAR | 1<br>1<br>2<br><br>1<br>2 |
| ABCA1_HUMAN (O95477) ATP-binding cassette sub-family A member 1 (ATP-binding cassette transporter 1) (ATP-binding cassette 1) (ABC-1) (Cholesterol efflux regulatory protein) [MASS=254284]                     | *    | 5.00  | *    | *    | * | 5 | 2 NQLGTGYLTLVK<br>3 SVVLTSHSM[147]EEC[330]EALC[339]TRMAIM[147]VNGR<br>2 YGGFSLGVSNTQALPPSQEVNDATK<br>2 PFTEDDAADPNDSIDIPESR                              | 1<br>1<br>1<br>1          |
| ABCB8_HUMAN (Q9NUT2) ATP-binding cassette sub-family B member 8, mitochondrial precursor (Mitochondrial ATP-binding cassette 1) (M-ABC1) [MASS=79947]                                                           | *    | 3.67  | *    | *    | * | 1 | 3 APLAPRWSPSAWC[330]WVGGALLGPMVLSK                                                                                                                       | 1                         |
| ABCG1_HUMAN (P45844) ATP-binding cassette sub-family G member 1 (White protein homolog) (ATP-binding cassette transporter 8) [MASS=75592]                                                                       | *    | 9.00  | *    | *    | * | 3 | 2 PSEEVKQTK<br>3 SVC[339]VSVDEVVSSNMEATETDLLNGHLK<br>3 EGM[147]C[339]DSDHKRDLGGDAEVNPFVWHR                                                               | 1<br>1<br>1               |
| ACAD8_HUMAN (Q9UKU7) Acyl-CoA dehydrogenase family member 8, mitochondrial precursor (EC 1.3.99.-) (ACAD-8) (Isobutyryl-CoA dehydrogenase) (Activator-recruited cofactor 42 kDa component) (ARC42) [MASS=45070] | *    | 4.10  | *    | *    | * | 1 | 2 LGC[330]LPGGLRVLVQTGHR                                                                                                                                 | 1                         |
| ACADS_HUMAN (P16219) Short-chain specific acyl-CoA dehydrogenase, mitochondrial precursor (EC 1.3.99.2) (SCAD) (Butyryl-CoA dehydrogenase) [MASS=44297]                                                         | *    | 8.50  | *    | *    | * | 1 | 3 QAWVTPFTSGDKIGC[330]FALSEPGNGSDAGAASTAR                                                                                                                | 1                         |

|                                                                                                                                                                                                          |      |       |      |      |    |   |   |                                                  |   |
|----------------------------------------------------------------------------------------------------------------------------------------------------------------------------------------------------------|------|-------|------|------|----|---|---|--------------------------------------------------|---|
| ACHB2_HUMAN (P17787) Neuronal acetylcholine receptor protein subunit beta-2 precursor [MASS=57019]                                                                                                       | 0.00 | 2.99  | 0.42 | 0.00 | 1  | 1 | 2 | RC[330]GPVALLLGFGLLR                             | 1 |
|                                                                                                                                                                                                          |      |       |      |      |    |   | 2 | VAVPSTIHC[339]DHLIEAQVGGEKDLR                    | 1 |
|                                                                                                                                                                                                          |      |       |      |      |    |   | 2 | VAVPSTIHC[330]DHLIEAQVGGEK                       | 1 |
|                                                                                                                                                                                                          |      |       |      |      |    |   | 3 | VAVPSTIHC[330]DHLIEAQVGGEK                       | 1 |
|                                                                                                                                                                                                          |      |       |      |      |    |   | 2 | VGLIGSC[330]TNSSYEDM[147]GR                      | 1 |
|                                                                                                                                                                                                          |      |       |      |      |    |   | 2 | VAVPSTIHC[339]DHLIEAQVGGEK                       | 2 |
| ACON_HUMAN (Q99798) Aconitate hydratase, mitochondrial precursor (EC 4.2.1.3) (Citrate hydro-lyase) (Aconitase) [MASS=85425]                                                                             | 1.00 | 7.95  | 1.28 | 0.03 | 6  | 3 |   |                                                  |   |
|                                                                                                                                                                                                          |      |       |      |      |    |   | 2 | MSPLSIVTALVDKIDMC[330]K                          | 1 |
|                                                                                                                                                                                                          |      |       |      |      |    |   | 3 | FGRILEDLDSLGLVIC[339]YM[147]HNKIHSK              | 1 |
|                                                                                                                                                                                                          |      |       |      |      |    |   | 2 | SLEIC[339]HPQER                                  | 1 |
|                                                                                                                                                                                                          |      |       |      |      |    |   | 2 | SLEIC[330]HPQER                                  | 1 |
| ACOT9_HUMAN (Q9Y305) Acyl-coenzyme A thioesterase 9 (EC 3.1.2.-) (Acyl-CoA thioesterase 9) (Acyl-CoA thioester hydrolase 9) [MASS=46354]                                                                 | 1.00 | 13.30 | 1.41 | 0.00 | 2  | 3 |   |                                                  |   |
|                                                                                                                                                                                                          |      |       |      |      |    |   | 3 | LMC[339]PQEIVDYIADKK                             | 1 |
|                                                                                                                                                                                                          |      |       |      |      |    |   | 3 | VTQLC[330]RQYSDEM[147]PPLTLEGIQDRVLYVLK          | 1 |
| ACPM_HUMAN (O14561) Acyl carrier protein, mitochondrial precursor (ACP) (NADH-ubiquinone oxidoreductase 9.6 kDa subunit) (Cl-SDAP) [MASS=17417]                                                          | 0.99 | 27.56 | 1.23 | 0.00 | 1  | 2 |   |                                                  |   |
|                                                                                                                                                                                                          |      |       |      |      |    |   | 3 | C[330]PEALFQPSFLGM[147]ESC[330]GIHETTFNSIM[147]K | 3 |
|                                                                                                                                                                                                          |      |       |      |      |    |   | 2 | C[330]DVIDIRK                                    | 2 |
|                                                                                                                                                                                                          |      |       |      |      |    |   | 2 | C[339]DVIDIRK                                    | 2 |
| ACTB_HUMAN (P60709) Actin, cytoplasmic 1 (Beta-actin) [MASS=41736]                                                                                                                                       | 1.00 | 17.07 | 0.57 | 0.25 | 13 | 4 |   |                                                  |   |
|                                                                                                                                                                                                          |      |       |      |      |    |   | 3 | C[330]PEALFQPSFLGMESC[330]GIHETTFNSIM[147]K      | 1 |
|                                                                                                                                                                                                          |      |       |      |      |    |   | 1 | C[330]DVIDIR                                     | 1 |
|                                                                                                                                                                                                          |      |       |      |      |    |   | 2 | LC[330]YVALDFEQEM[147]ATAASSSLEK                 | 1 |
|                                                                                                                                                                                                          |      |       |      |      |    |   | 2 | C[330]DVIDIR                                     | 1 |
|                                                                                                                                                                                                          |      |       |      |      |    |   | 3 | C[339]PEALFQPSFLGMESC[339]GIHETTFNSIMK           | 1 |
|                                                                                                                                                                                                          |      |       |      |      |    |   | 3 | C[339]PEALFQPSFLGM[147]ESC[339]GIHETTFNSIMK      | 1 |
|                                                                                                                                                                                                          |      |       |      |      |    |   | 2 | LC[330]YVALDFEQEMATAASSSLEK                      | 1 |
|                                                                                                                                                                                                          |      |       |      |      |    |   | 3 | C[339]PEALFQPSFLGMESC[330]GIHETTFNSIMK           | 1 |
|                                                                                                                                                                                                          |      |       |      |      |    |   | 3 | C[339]PEALFQPSFLGM[147]ESC[339]GIHETTFNSIM[147]K | 1 |
| ACTY_HUMAN (P42025) Beta-centractin (Actin-related protein 1B) (ARP1B) [MASS=42293]                                                                                                                      | 0.82 | 2.93  | 0.14 | 0.00 | 1  | 1 |   |                                                  |   |
|                                                                                                                                                                                                          |      |       |      |      |    |   | 2 | YC[339]FPNYVGRPK                                 | 1 |
| ADA10_HUMAN (O14672) ADAM 10 precursor (EC 3.4.24.81) (A disintegrin and metalloproteinase domain 10) (Mammalian disintegrin-metalloprotease) (Kuzbanian protein homolog) (CDw156c antigen) [MASS=84142] | 0.00 | 4.55  | 0.89 | 0.00 | 1  | 2 |   |                                                  |   |
|                                                                                                                                                                                                          |      |       |      |      |    |   | 3 | EGIC[339]NGFTALC[339]PASDPK                      | 1 |
|                                                                                                                                                                                                          |      |       |      |      |    |   | 3 | HTQVC[330]INGQC[330]AGSIC[330]JEK                | 1 |

|                                                                                                                                                                                                                      |      |      |      |      |   |   |             |                                                                                                 |             |
|----------------------------------------------------------------------------------------------------------------------------------------------------------------------------------------------------------------------|------|------|------|------|---|---|-------------|-------------------------------------------------------------------------------------------------|-------------|
| ADA20_HUMAN (O43506) ADAM 20 precursor (EC 3.4.24.-) (A disintegrin and metalloproteinase domain 20) [MASS=81710]                                                                                                    | *    | 6.06 | *    | *    | * | 2 | 2<br>3      | LKYC[330]GNLNVVEEGEEEC[339]DC[330]GTIR<br>FGHC[330]GIVGTTYVKC[339]WTPDIMC[339]GR                | 1<br>1      |
| ADA28_HUMAN (Q9UKQ2) ADAM 28 precursor (EC 3.4.24.-) (A disintegrin and metalloproteinase domain 28) (Metalloproteinase-like, disintegrin-like, and cysteine-rich protein-L) (MDC-L) (eMDC II) (ADAM23) [MASS=87208] | 0.00 | 3.87 | 1.16 | 0.00 | 1 | 2 | 1<br>3      | HQSSREK<br>VAGTMAHEMGNHFGM[147]FHDDYSC[339]JK                                                   | 1<br>1      |
| ADAM2_HUMAN (Q99965) ADAM 2 precursor (A disintegrin and metalloproteinase domain 2) (Fertilin subunit beta) (PH-30) (PH30) [MASS=82457]                                                                             | 0.00 | 5.99 | 1.97 | 0.00 | 1 | 2 | 3<br>2      | M[147]WRVLFLLSGLGGLRMSNFDSLPPVQITVPEK<br>SVVMVSTC[339]TGLR                                      | 1<br>1      |
| ADCY6_HUMAN (O43306) Adenylate cyclase type 6 (EC 4.6.1.1) (Adenylate cyclase type VI) (ATP pyrophosphate-lyase 6) (Ca(2+)-inhibitable adenyl cyclase) [MASS=130615]                                                 | 0.00 | 5.82 | 0.50 | 0.00 | 1 | 3 | 2<br>3<br>3 | RFLTFQR<br>SPSAGLWC[330]PVFFVYIAYTLLPIRMR<br>LM[147]EQMKHINEHSFNNFQM[147]KIGLNM[147]GPVVAGVIGAR | 1<br>1<br>1 |
| ADCY7_HUMAN (P51828) Adenylate cyclase type 7 (EC 4.6.1.1) (Adenylate cyclase type VII) (ATP pyrophosphate-lyase 7) (Adenyl cyclase 7) [MASS=120308]                                                                 | *    | 2.59 | *    | *    | * | 2 | 2<br>2      | C[339]MPDNNFHSLYVKR<br>C[330]C[330]PARGTLC[330]TISER                                            | 1<br>1      |
| ADNP_HUMAN (Q9H2P0) Activity-dependent neuroprotector (Activity-dependent neuroprotective protein) [MASS=123562]                                                                                                     | 0.00 | 5.63 | *    | *    | * | 2 | 3<br>3      | PNLNSTGVNMMSSVHLQNNYGVKSVGQGYSVGQSM[147]R<br>C[330]IHC[330]LGVYTSNM[147]TASTITLHLVHC[339]R      | 1<br>1      |

|                                                                                                                                                                                                                                |      |       |      |      |    |   |   |   |                                  |   |
|--------------------------------------------------------------------------------------------------------------------------------------------------------------------------------------------------------------------------------|------|-------|------|------|----|---|---|---|----------------------------------|---|
|                                                                                                                                                                                                                                |      |       |      |      |    |   |   | 2 | YFAGNLASGGAAGATSLC[330]FVYPLDFAR | 4 |
|                                                                                                                                                                                                                                |      |       |      |      |    |   |   | 2 | VKLLLQVQHASK                     | 1 |
|                                                                                                                                                                                                                                |      |       |      |      |    |   |   | 2 | EFHGLGDC[339]IHK                 | 1 |
|                                                                                                                                                                                                                                |      |       |      |      |    |   |   | 1 | EFHGLGDC[339]IHK                 | 3 |
| ADT1_HUMAN (P12235) ADP/ATP translocase 1 (Adenine nucleotide translocator 1) (ANT 1) (ADP,ATP carrier protein 1) (Solute carrier family 25 member 4) (ADP,ATP carrier protein, heart/skeletal muscle isoform T1) [MASS=32933] | 1.00 | 19.19 | 1.04 | 0.13 | 20 | 4 |   | 2 | YFAGNLASGGAAGATSLC[339]FVYPLDFAR | 2 |
|                                                                                                                                                                                                                                |      |       |      |      |    |   |   | 2 | EFHGLGDC[330]IHK                 | 1 |
|                                                                                                                                                                                                                                |      |       |      |      |    |   |   | 2 | MM[147]MQSGR                     | 1 |
|                                                                                                                                                                                                                                |      |       |      |      |    |   |   | 1 | EFHGLGDC[330]IHK                 | 3 |
|                                                                                                                                                                                                                                |      |       |      |      |    |   |   | 3 | YFAGNLASGGAAGATSLC[339]FVYPLDFAR | 4 |
|                                                                                                                                                                                                                                |      |       |      |      |    |   |   | 3 | YFAGNLASGGAAGATSLC[330]FVYPLDFAR | 2 |
| ADT2_HUMAN (P05141) ADP/ATP translocase 2 (Adenine nucleotide translocator 2) (ANT 2) (ADP,ATP carrier protein 2) (Solute carrier family 25 member 5) (ADP,ATP carrier protein, fibroblast isoform) [MASS=32764]               | 0.87 | 2.69  | *    | *    | *  | 1 | 1 | 1 | GLGDC[330]LVK                    | 1 |
| ADT3_HUMAN                                                                                                                                                                                                                     | 0.87 | 5.39  | 1.17 | 0.00 | 1  | 1 | 2 | 2 | GLGDC[339]LVKITKSDGIR            | 1 |
| AFAM_HUMAN (P43652) Afamin precursor (Alpha-albumin) (Alpha-Alb) [MASS=69069]                                                                                                                                                  | *    | 3.51  | *    | *    | *  | 1 | 2 | 2 | FTDSENV[339]QERDADPDTFFAK        | 1 |
| AFF4_HUMAN (Q9UHB7) AF4/FMR2 family member 4 (ALL1-fused gene from chromosome 5q31) (Major CDK9 elongation factor-associated protein) [MASS=127458]                                                                            | *    | 5.93  | *    | *    | *  | 4 | 2 | 2 | VM[147]GPLIFNASIM[147]TDLVRYTR   | 1 |
|                                                                                                                                                                                                                                |      |       |      |      |    |   | 2 | 2 | YKSTKSSQK                        | 1 |
|                                                                                                                                                                                                                                |      |       |      |      |    |   | 2 | 2 | LSPGNSGNYSSGASSASAGSSVTIPQK      | 1 |
|                                                                                                                                                                                                                                |      |       |      |      |    |   | 2 | 2 | C[330]ESLLYLRLFK                 | 1 |
| AFG32_HUMAN (Q9Y4W6) AFG3-like protein 2 (EC 3.4.24.-) (Paraplegin-like protein) [MASS=88483]                                                                                                                                  | *    | 4.64  | *    | *    | *  | 2 | 2 | 2 | ASEEIFFGR                        | 1 |
|                                                                                                                                                                                                                                |      |       |      |      |    |   | 2 | 2 | KVTQSAYAQIVQFGMNEKVGQISFDLPR     | 1 |

|                                                                                                                                                                                                                                                                               |      |       |      |      |   |   |   |                                         |   |
|-------------------------------------------------------------------------------------------------------------------------------------------------------------------------------------------------------------------------------------------------------------------------------|------|-------|------|------|---|---|---|-----------------------------------------|---|
| AKAP6_HUMAN (Q13023) A-kinase anchor protein 6 (Protein kinase A-anchoring protein 6) (PRKA6) (A-kinase anchor protein 100 kDa) (AKAP 100) (mAKAP) [MASS=256664]                                                                                                              | *    | 3.32  | *    | *    | * | 4 | 2 | EAVEEEGHQLELIASHK                       | 1 |
|                                                                                                                                                                                                                                                                               |      |       |      |      |   |   | 3 | C[339]KALMDSLDDSNNTAGK                  | 1 |
|                                                                                                                                                                                                                                                                               |      |       |      |      |   |   | 2 | NSSHTELGTKRENK                          | 1 |
|                                                                                                                                                                                                                                                                               |      |       |      |      |   |   | 3 | SKHQTTTELQPDVPPHERILASASHEM[147]DR      | 1 |
| AKAP9_HUMAN (Q99996) A-kinase anchor protein 9 (Protein kinase A-anchoring protein 9) (PRKA9) (A-kinase anchor protein 450 kDa) (AKAP 450) (A-kinase anchor protein 350 kDa) (AKAP 350) (hgAKAP 350) (AKAP 120-like protein) (Protein hyperion) (Protein yotia) [MASS=453664] | *    | 4.17  | *    | *    | * | 9 | 2 | LFKDDM[147]EK                           | 1 |
|                                                                                                                                                                                                                                                                               |      |       |      |      |   |   | 2 | LEQLRAELDEMYGQQIVQM[147]KQELIR          | 1 |
|                                                                                                                                                                                                                                                                               |      |       |      |      |   |   | 2 | EELIFAQEEKIKELQK                        | 1 |
|                                                                                                                                                                                                                                                                               |      |       |      |      |   |   | 1 | PTNLLR                                  | 1 |
|                                                                                                                                                                                                                                                                               |      |       |      |      |   |   | 3 | PSQELLEYNIQKQSQMLEM[147]QVELSSMKDR      | 1 |
|                                                                                                                                                                                                                                                                               |      |       |      |      |   |   | 1 | EELGLILEEK[C339]ALQR                    | 1 |
|                                                                                                                                                                                                                                                                               |      |       |      |      |   |   | 3 | SLENQTYFKSFEENGKGSIIINLETR              | 1 |
|                                                                                                                                                                                                                                                                               |      |       |      |      |   |   | 2 | PELSLEVQLQAERDAIDR                      | 1 |
|                                                                                                                                                                                                                                                                               |      |       |      |      |   |   | 3 | LLGELQEQIVQKNQEIKNMK                    | 1 |
| AKT1_HUMAN (P31749) RAC-alpha serine/threonine-protein kinase (EC 2.7.11.1) (RAC-PK-alpha) (Protein kinase B) (PKB) (C-AKT) [MASS=55686]                                                                                                                                      | 0.00 | 3.54  | *    | *    | * | 1 | 3 | FYGAEIVSALDYHSEK                        | 1 |
| AL2S8_HUMAN (Q8N187) Amyotrophic lateral sclerosis 2 chromosomal region candidate gene 8 protein (Calcium-response factor) (CaRF) (Protein NYD-SP24) [MASS=80697]                                                                                                             | *    | 4.00  | *    | *    | * | 1 | 3 | SQYVPYDGIPFVNAGSRAVVM[147]EC[330]QYGPRR | 1 |
| ALBU_HUMAN (P02768) Serum albumin precursor [MASS=69366]                                                                                                                                                                                                                      | 1.00 | 22.99 | 0.62 | 0.22 | 6 | 9 | 2 | NLGKVGSKC[330]C[330]K                   | 1 |
|                                                                                                                                                                                                                                                                               |      |       |      |      |   |   | 1 | RDAHK                                   | 1 |
|                                                                                                                                                                                                                                                                               |      |       |      |      |   |   | 2 | WVTFISLLFLFSSAYSARGVFR                  | 1 |
|                                                                                                                                                                                                                                                                               |      |       |      |      |   |   | 2 | ADDKETC[330]FAEEGKK                     | 1 |
|                                                                                                                                                                                                                                                                               |      |       |      |      |   |   | 3 | MPC[330]AEDYLSVVLNQLC[330]VLHEK         | 2 |
|                                                                                                                                                                                                                                                                               |      |       |      |      |   |   | 3 | QEPERNEC[330]FLQHKDDNPNLPR              | 1 |
|                                                                                                                                                                                                                                                                               |      |       |      |      |   |   | 2 | FQNALLVRYTKK                            | 1 |
|                                                                                                                                                                                                                                                                               |      |       |      |      |   |   | 3 | VHTEC[330]C[330]HGDILLEC[330]ADDRADLAK  | 1 |
|                                                                                                                                                                                                                                                                               |      |       |      |      |   |   | 2 | C[330]C[330]AAADPHEC[330]YAK            | 1 |
| ALDH2_HUMAN (P05091) Aldehyde dehydrogenase, mitochondrial precursor (EC 1.2.1.3) (ALDH class 2) (ALDH1) (ALDH-E2) [MASS=56381]                                                                                                                                               | 1.00 | 2.13  | 1.74 | 0.00 | 2 | 1 | 2 | LLC[330]GGGIAADR                        | 1 |
|                                                                                                                                                                                                                                                                               |      |       |      |      |   |   | 2 | LLC[339]GGGIAADR                        | 1 |



|                                                                                                                                                                                              |      |       |      |      |    |   |   |                                             |   |
|----------------------------------------------------------------------------------------------------------------------------------------------------------------------------------------------|------|-------|------|------|----|---|---|---------------------------------------------|---|
| ALDOA_HUMAN (P04075) Fructose-bisphosphate aldolase A (EC 4.1.2.13) (Muscle-type aldolase) (Lung cancer antigen NY-LU-1) [MASS=39289]                                                        | 1.00 | 31.40 | 0.61 | 0.28 | 10 | 7 | 3 | RLQSIGTENTEENRR                             | 1 |
|                                                                                                                                                                                              |      |       |      |      |    |   | 2 | C[330]QYVTEK                                | 1 |
|                                                                                                                                                                                              |      |       |      |      |    |   | 3 | QLLLTADDRVNPC[339]IGGVILFHETLYQK            | 1 |
|                                                                                                                                                                                              |      |       |      |      |    |   | 3 | YASIC[339]QQNGIVPIVEPEILPDGDHDLKR           | 1 |
|                                                                                                                                                                                              |      |       |      |      |    |   | 3 | YASIC[330]QQNGIVPIVEPEILPDGDHDLKR           | 2 |
|                                                                                                                                                                                              |      |       |      |      |    |   | 2 | VNPC[330]IGGVILFHETLYQK                     | 1 |
|                                                                                                                                                                                              |      |       |      |      |    |   | 2 | RC[330]QYVTEK                               | 1 |
|                                                                                                                                                                                              |      |       |      |      |    |   | 2 | ALANSLAC[330]QGK                            | 2 |
|                                                                                                                                                                                              |      |       |      |      |    |   | 2 | VNPC[339]IGGVILFHETLYQK                     | 1 |
|                                                                                                                                                                                              |      |       |      |      |    |   | 1 | C[330]QYVTEK                                | 1 |
| ALDOB_HUMAN (P05062) Fructose-bisphosphate aldolase B (EC 4.1.2.13) (Liver-type aldolase) [MASS=39342]                                                                                       | 0.00 | 3.31  | *    | *    | *  | 1 | 3 | PNM[147]VTAGHAC[339]TK                      | 1 |
| ALG12_HUMAN (Q9BV10) Dolichyl-P-Man:Man(7)GlcNAc(2)-PP-dolichyl-alpha-1,6-mannosyltransferase (EC 2.4.1.-) (Mannosyltransferase ALG12 homolog) (hALG12) (Membrane protein SB87) [MASS=54654] | *    | 9.63  | *    | *    | *  | 2 | 3 | VLASVVGTTGVSLNLTQLPPFNVHLQTKLVLLER          | 1 |
|                                                                                                                                                                                              |      |       |      |      |    |   | 3 | FLQNSAWRYDKR                                | 1 |
| ALG6_HUMAN (Q9Y672) Dolichyl pyrophosphate Man9GlcNAc2 alpha-1,3-glucosyltransferase (EC 2.4.1.-) (Dolichyl-P-Glc:Man9GlcNAc2-PP-dolichyl glucosyltransferase) [MASS=58180]                  | *    | 10.85 | *    | *    | *  | 2 | 3 | DELLM[147]PSVVTTMAFFIAC[339]VTSFSIFEK       | 1 |
|                                                                                                                                                                                              |      |       |      |      |    |   | 3 | IKDILPRHIQLIM[147]SFC[339]FTFLSLLPAC[339]IK | 1 |
| ALMS1_HUMAN (Q8TCU4) Alstrom syndrome protein 1 [MASS=460933]                                                                                                                                | *    | 1.34  | *    | *    | *  | 3 | 2 | PIVIYKQAFPEGHLPEESLK                        | 1 |
|                                                                                                                                                                                              |      |       |      |      |    |   | 3 | GM[147]GC[330]KPEAVC[339]SHIIIESHEK         | 1 |
|                                                                                                                                                                                              |      |       |      |      |    |   | 3 | HVNLSASLDQNNSHFK                            | 1 |
| ALU7_HUMAN (P39194) Alu subfamily SQ sequence contamination warning entry [MASS=64513]                                                                                                       | *    | 3.54  | *    | *    | *  | 1 | 2 | LPGSSDSPASASRVAGITGAR                       | 1 |
| AMOL1_HUMAN (Q8IY63) Angiotin-like protein 1 [MASS=106573]                                                                                                                                   | *    | 2.30  | *    | *    | *  | 1 | 3 | HGNGQPANM[147]PEYNAPALLELVR                 | 1 |
| AMOT_HUMAN (Q4VCS5) Angiotin [MASS=118085]                                                                                                                                                   | *    | 1.11  | *    | *    | *  | 1 | 3 | GSLGILLGGDYR                                | 1 |
| ANGL1_HUMAN (O95841) Angiotin-related protein 1 precursor (Angiotin-like 1) (Angiotin-3) (ANG-3) [MASS=56719]                                                                                | 0.00 | 4.68  | 0.44 | 0.00 | 1  | 1 | 2 | ITGPIC[330]VNTKGQDASTIKDMITR                | 1 |

|                                                                                                                                                                 |      |      |      |      |   |    |   |                                          |   |
|-----------------------------------------------------------------------------------------------------------------------------------------------------------------|------|------|------|------|---|----|---|------------------------------------------|---|
| ANK2_HUMAN (Q01484) Ankyrin-2 (Brain ankyrin) (Ankyrin-B) (Ankyrin, nonerythroid) [MASS=430341]                                                                 | 0.99 | 4.99 | 0.94 | 0.00 | 1 | 10 | 1 | VSSIGVK                                  | 1 |
|                                                                                                                                                                 |      |      |      |      |   |    | 3 | SRDVEVLEGGKPIYVDC[330]FGNLVPLTK          | 1 |
|                                                                                                                                                                 |      |      |      |      |   |    | 3 | DSLEASPVLEDNSSHKTPDSLEPSPLKESPC[339]R    | 1 |
|                                                                                                                                                                 |      |      |      |      |   |    | 3 | VEQQLSDLDTSVQKTVAPQGQDM[147]ASIAPDNRSK   | 1 |
|                                                                                                                                                                 |      |      |      |      |   |    | 3 | ALPLPEASVKTDGTESKPPQGVIR                 | 1 |
|                                                                                                                                                                 |      |      |      |      |   |    | 3 | IENPNSLQDQSQYLLKIWLER                    | 1 |
|                                                                                                                                                                 |      |      |      |      |   |    | 2 | SYTETETESR                               | 1 |
|                                                                                                                                                                 |      |      |      |      |   |    | 3 | MADEQGDMDLQISPRK                         | 1 |
|                                                                                                                                                                 |      |      |      |      |   |    | 3 | C[330]TAPTRVTC[330]R                     | 1 |
|                                                                                                                                                                 |      |      |      |      |   |    | 2 | IRVGLQAQPMHSELVKK                        | 1 |
| ANK3_HUMAN (Q12955) Ankyrin-3 (ANK-3) (Ankyrin-G) [MASS=480400]                                                                                                 | *    | 2.72 | *    | *    | * | 7  | 2 | STLGASTTSSVKSISDVASPIRSLR                | 1 |
|                                                                                                                                                                 |      |      |      |      |   |    | 2 | QTTVEETAVER                              | 1 |
|                                                                                                                                                                 |      |      |      |      |   |    | 2 | KRYSYLTEPGM[147]IER                      | 1 |
|                                                                                                                                                                 |      |      |      |      |   |    | 3 | TRDGLTPLHC[339]GAR                       | 1 |
|                                                                                                                                                                 |      |      |      |      |   |    | 3 | IPVKNTPRDNIIAVR                          | 1 |
|                                                                                                                                                                 |      |      |      |      |   |    | 3 | NATTDALTSVLTINR                          | 1 |
|                                                                                                                                                                 |      |      |      |      |   |    | 2 | AEEKAPSLPSSPEKM[147]VLSQQTEDSK           | 1 |
| ANKR6_HUMAN (Q9Y2G4) Ankyrin repeat domain-containing protein 6 [MASS=75722]                                                                                    | 0.00 | 5.49 | 0.22 | 0.00 | 1 | 2  | 2 | AELGSVQDKM[147]NTKLGQM[147]ENK           | 1 |
|                                                                                                                                                                 |      |      |      |      |   |    | 2 | AGC[330]DLDVQDDGDQTALHR                  | 1 |
| ANM1_HUMAN (Q99873) Protein arginine N-methyltransferase 1 (EC 2.1.1.-) (Interferon receptor 1-bound protein 4) [MASS=41485]                                    | 0.00 | 3.60 | 0.89 | 0.00 | 1 | 1  | 2 | GQLC[330]ELSC[330]STDYR                  | 1 |
| ANM3_HUMAN (O60678) Protein arginine N-methyltransferase 3 (EC 2.1.1.-) (Heterogeneous nuclear ribonucleoprotein methyltransferase-like protein 3) [MASS=59903] | *    | 6.21 | *    | *    | * | 2  | 2 | ITRTSMC[330]TAIAGYFDIYFEK                | 1 |
|                                                                                                                                                                 |      |      |      |      |   |    | 3 | SEHQFNIDSM[147]VHK                       | 2 |
| ANR11_HUMAN (Q6UB99) Ankyrin repeat domain-containing protein 11 (Ankyrin repeat-containing cofactor 1) [MASS=298068]                                           | *    | 0.30 | *    | *    | * | 1  | 2 | EKVFEKHK                                 | 1 |
| ANR12_HUMAN (Q6UB98) Ankyrin repeat domain-containing protein 12 (Ankyrin repeat-containing cofactor 2) (GAC-1 protein) [MASS=235652]                           | *    | 2.62 | *    | *    | * | 3  | 2 | GETPLHMAAIRGDVKQVK                       | 1 |
|                                                                                                                                                                 |      |      |      |      |   |    | 2 | RLVNDDLMTQSFERMLSLK                      | 1 |
|                                                                                                                                                                 |      |      |      |      |   |    | 2 | DEDHSPTFENSDC[330]TLKK                   | 1 |
| ANR28_HUMAN (O15084) Ankyrin repeat domain-containing protein 28 [MASS=116528]                                                                                  | 0.00 | 4.33 | 1.22 | 0.00 | 1 | 2  | 3 | TPLHM[147]TALHGRFSRSQTIIQSGAVIDC[330]EDK | 1 |
|                                                                                                                                                                 |      |      |      |      |   |    | 2 | C[330]AEALVPLLSNVNVS DR                  | 1 |

|                                                                                                                                                                                                                                                                                |      |      |      |      |   |   |   |                                             |   |
|--------------------------------------------------------------------------------------------------------------------------------------------------------------------------------------------------------------------------------------------------------------------------------|------|------|------|------|---|---|---|---------------------------------------------|---|
| ANR52_HUMAN (Q8NB46) Ankyrin repeat domain-containing protein 52 [MASS=115057]                                                                                                                                                                                                 | *    | 5.86 | *    | *    | * | 2 | 3 | KLLSSGQLYSIVSSLSNEHVLSAGFDINTPDNLGR         | 1 |
|                                                                                                                                                                                                                                                                                |      |      |      |      |   |   | 3 | NC[339]SIAAAKTVGGC[339]GALPHGASC[339]PYSQER | 1 |
| ANRA2_HUMAN (Q9H9E1) Ankyrin repeat family A protein 2 (RFXANK-like 2) [MASS=34272]                                                                                                                                                                                            | 0.00 | 7.03 | *    | *    | * | 1 | 2 | IEHPLDPNSEEKSAQGVAMGMK                      | 1 |
| ANXA2_HUMAN (P07355) Annexin A2 (Annexin II) (Lipocortin II) (Calpactin I heavy chain) (Chromobindin-8) (p36) (Protein I) (Placental anticoagulant protein IV) (PAP-IV) [MASS=38473]                                                                                           | 0.92 | 7.10 | 1.68 | 0.00 | 1 | 1 | 3 | GDLENAFLNLVQC[339]IQNKPLYFADR               | 1 |
| ANXA6_HUMAN (P08133) Annexin A6 (Annexin VI) (Lipocortin VI) (P68) (P70) (Protein III) (Chromobindin-20) (67 kDa calelectrin) (Calphobindin-II) (CPB-II) [MASS=75742]                                                                                                          | 1.00 | 9.23 | 0.54 | 0.08 | 3 | 4 | 2 | QRQEV[339]QSYK                              | 1 |
|                                                                                                                                                                                                                                                                                |      |      |      |      |   |   | 2 | ALIEILATRTNAEIRAINAYK                       | 1 |
|                                                                                                                                                                                                                                                                                |      |      |      |      |   |   | 2 | SELDMLDIREIFRTK                             | 1 |
|                                                                                                                                                                                                                                                                                |      |      |      |      |   |   | 2 | QRQEV[330]QSYK                              | 1 |
|                                                                                                                                                                                                                                                                                |      |      |      |      |   |   | 2 | LIVGLM[147]RPPAYC[330]DAK                   | 1 |
| AP1B1_HUMAN (Q10567) AP-1 complex subunit beta-1 (Adapter-related protein complex 1 beta-1 subunit) (Beta-adaptin 1) (Adaptor protein complex AP-1 beta-1 subunit) (Golgi adaptor HA1/AP1 adaptin beta subunit) (Clathrin assembly protein complex 1 beta large) [MASS=104606] | 0.00 | 5.69 | *    | *    | * | 5 | 2 | C[330]LKDEDPYVRK                            | 1 |
|                                                                                                                                                                                                                                                                                |      |      |      |      |   |   | 2 | DDREAQ[330]ER                               | 1 |
|                                                                                                                                                                                                                                                                                |      |      |      |      |   |   | 2 | C[339]AIKVEQSAER                            | 1 |
|                                                                                                                                                                                                                                                                                |      |      |      |      |   |   | 2 | C[330]VSTLLDLIQTK                           | 1 |
|                                                                                                                                                                                                                                                                                |      |      |      |      |   |   | 2 | KTAAVC[339]VAK                              | 1 |
| AP2A1_HUMAN (O95782) AP-2 complex subunit alpha-1 (Adapter-related protein complex 2 alpha-1 subunit) (Alpha-adaptin A) (Adaptor protein complex AP-2 alpha-1 subunit) (Clathrin assembly protein complex 2 alpha-A large chain) (100 kDa coated vesicle prote) [MASS=107554]  | 0.00 | 1.94 | *    | *    | * | 2 | 2 | SKFKGDK                                     | 1 |
|                                                                                                                                                                                                                                                                                |      |      |      |      |   |   | 2 | AC[339]NQLGQFLQHR                           | 1 |
|                                                                                                                                                                                                                                                                                |      |      |      |      |   |   | 2 | AC[330]NQLGQFLQHR                           | 1 |
| AP2A2_HUMAN (O94973) AP-2 complex subunit alpha-2 (Adapter-related protein complex 2 alpha-2 subunit) (Alpha-adaptin C) (Adaptor protein complex AP-2 alpha-2 subunit) (Clathrin assembly protein complex 2 alpha-C large chain) (100 kDa coated vesicle prote) [MASS=103960]  | 1.00 | 7.24 | 0.70 | 0.02 | 3 | 3 | 2 | NPTFMGLALHC[330]IASVGSR                     | 1 |
|                                                                                                                                                                                                                                                                                |      |      |      |      |   |   | 2 | IVTSASTDLQDYTYFVPAPWLSVKLLR                 | 1 |
|                                                                                                                                                                                                                                                                                |      |      |      |      |   |   | 2 | SSPLIQFHLLHSHKFLC[339]SVPTR                 | 1 |

|                                                                                                                                                                                                                                                                              |      |       |      |      |   |   |   |                                       |   |
|------------------------------------------------------------------------------------------------------------------------------------------------------------------------------------------------------------------------------------------------------------------------------|------|-------|------|------|---|---|---|---------------------------------------|---|
| AP2B1_HUMAN (P63010) AP-2 complex subunit beta-1 (Adapter-related protein complex 2 beta-1 subunit) (Beta-adaptin) (Plasma membrane adaptor HA2/AP2 adaptin beta subunit) (Clathrin assembly protein complex 2 beta large chain) (AP105B) [MASS=104552]                      | 1.00 | 7.26  | 0.74 | 0.12 | 6 | 3 | 2 | EC[330]HLNADTVSSK                     | 1 |
|                                                                                                                                                                                                                                                                              |      |       |      |      |   |   | 3 | SQPDMAIMAVNSFVKDC[330]EDPNPLIRALAVR   | 1 |
|                                                                                                                                                                                                                                                                              |      |       |      |      |   |   | 2 | NNIDVFYFSC[330]LIPLNVLFVEDGKM[147]ER  | 1 |
| AP2M1_HUMAN (Q96CW1) AP-2 complex subunit mu-1 (Adaptin mu-1) (AP-2 mu-2 chain) (Clathrin coat assembly protein AP50) (Clathrin coat-associated protein AP50) (Plasma membrane adaptor AP-2 50 kDa protein) (HA2 50 kDa subunit) (Clathrin assembly protein co [MASS=49654]  | 0.57 | 10.34 | 4.60 | 0.00 | 1 | 2 | 2 | QSIAIDDC[330]TFHQQC[330]VR            | 1 |
|                                                                                                                                                                                                                                                                              |      |       |      |      |   |   | 3 | RNELFLDVLESVNLLM[147]SPQGQVLSAHVSGR   | 1 |
| AP3B2_HUMAN (Q13367) AP-3 complex subunit beta-2 (Adapter-related protein complex 3 beta-2 subunit) (Beta3B-adaptin) (Adaptor protein complex AP-3 beta-2 subunit) (AP-3 complex beta-2 subunit) (Clathrin assembly protein complex 3 beta-2 large chain) (Neu [MASS=119058] | *    | 4.62  | *    | *    | * | 2 | 3 | ILKLEVLTLNLANETNIPTVLRREFQTYIR        | 1 |
|                                                                                                                                                                                                                                                                              |      |       |      |      |   |   | 3 | EQGKLM[147]GMNEITEKLM[147]LPDTC[330]R | 1 |
| AP3D1_HUMAN (O14617) AP-3 complex subunit delta-1 (Adapter-related protein complex 3 subunit delta-1) (Delta-adaptin 3) (AP-3 complex subunit delta) (Delta-adaptin) [MASS=130157]                                                                                           | *    | 1.30  | *    | *    | * | 1 | 2 | DLILQC[330]LDDKDESIR                  | 1 |
|                                                                                                                                                                                                                                                                              |      |       |      |      |   |   | 2 | DLILQC[339]LDDKDESIR                  | 1 |
| APEX2_HUMAN (Q9UBZ4) DNA-(apurinic or apyrimidinic site) lyase 2 (EC 4.2.99.18) (Apurinic-apyrimidinic endonuclease 2) (AP endonuclease 2) (APEX nuclease 2) (APEX nuclease-like 2) (AP endonuclease XTH2) [MASS=57400]                                                      | *    | 5.79  | *    | *    | * | 2 | 3 | ALDSEGRALLTQHK                        | 1 |
|                                                                                                                                                                                                                                                                              |      |       |      |      |   |   | 2 | PQPSQVGSSRGQKNLK                      | 1 |
| APMAP_HUMAN (Q9HDC9) Adipocyte plasma membrane-associated protein (BSCv protein) [MASS=46480]                                                                                                                                                                                | 0.98 | 15.62 | 0.95 | 0.00 | 1 | 4 | 1 | VYVSGLM[147]K                         | 2 |
|                                                                                                                                                                                                                                                                              |      |       |      |      |   |   | 3 | LFSQETVM[147]KFVPRYSLVLELSDSGAFR      | 1 |
|                                                                                                                                                                                                                                                                              |      |       |      |      |   |   | 3 | TRDDEPVC[339]GRPLGIR                  | 1 |
|                                                                                                                                                                                                                                                                              |      |       |      |      |   |   | 3 | PQVVTTTTDGGQAPEAK                     | 1 |
| APOA_HUMAN (P08519) Apolipoprotein(a) precursor (EC 3.4.21.-) (Apo(a)) (Lp(a)) [MASS=501317]                                                                                                                                                                                 | *    | 0.55  | *    | *    | * | 1 | 3 | GTYSTTVTGRTC[339]QAWSSM[147]TPHQHSR   | 1 |

|                                                                                                                                                                     |      |       |      |      |   |   |   |                                            |   |
|---------------------------------------------------------------------------------------------------------------------------------------------------------------------|------|-------|------|------|---|---|---|--------------------------------------------|---|
| APOD_HUMAN (P05090) Apolipoprotein D precursor (Apo-D) (ApoD) [MASS=21275]                                                                                          | 0.63 | 6.35  | 0.52 | 0.00 | 1 | 1 | 2 | KM[147]TVTDQVNC[330]PK                     | 1 |
| APOE_HUMAN (P02649) Apolipoprotein E precursor (Apo-E) [MASS=36154]                                                                                                 | *    | 6.94  | *    | *    | * | 1 | 2 | LSKELQAAQARLGADM[147]EDVC[330]GR           | 1 |
| AQP1_HUMAN (P29972) Aquaporin-1 (AQP-1) (Aquaporin-CHIP) (Water channel protein for red blood cells and kidney proximal tubule) (Urine water channel) [MASS=28395]  | 0.99 | 12.31 | 0.47 | 0.00 | 1 | 1 | 3 | DLGGSAPLAIGLSVALGHLLAIDYTG[330]GINPAR      | 1 |
| ARF3_HUMAN (P61204) ADP-ribosylation factor 3 [MASS=20469]                                                                                                          | 0.00 | 16.11 | 0.53 | 0.00 | 1 | 1 | 2 | HRNWWYIQATC[330]ATSGDGLYEGLDWLANQLK        | 1 |
| ARHG3_HUMAN (Q9NR81) Rho guanine nucleotide exchange factor 3 (Exchange factor found in platelets and leukemic and neuronal tissues) (XPLN) [MASS=59782]            | 0.00 | 6.27  | 0.27 | 0.00 | 1 | 2 | 2 | DAEEPSNKR                                  | 1 |
|                                                                                                                                                                     |      |       |      |      |   |   | 2 | ANC[330]SLELPPASGPAKDAEEPSNKR              | 1 |
| ARHG8_HUMAN (Q7Z628) Neuroepithelial cell-transforming gene 1 protein (p65 Net1 proto-oncogene) (Rho guanine nucleotide exchange factor 8) [MASS=67740]             | *    | 2.52  | *    | *    | * | 1 | 2 | LNAYRGYC[330]SNQLAAK                       | 2 |
| ARHGA_HUMAN (O15013) Rho guanine nucleotide exchange factor 10 [MASS=151611]                                                                                        | 0.00 | 2.70  | 0.59 | 0.00 | 1 | 2 | 3 | VFM[147]LNDVLM[147]C[330]ATVSSRPSHDSRVMSQR | 1 |
|                                                                                                                                                                     |      |       |      |      |   |   | 2 | MRPPGFSLR                                  | 1 |
| ARI2_HUMAN (O95376) Protein ariadne-2 homolog (ARI-2) (Triad1 protein) [MASS=57819]                                                                                 | *    | 3.85  | *    | *    | * | 1 | 3 | SLQLEAQTQRIHEKIQER                         | 1 |
| ARI4A_HUMAN (P29374) AT-rich interactive domain-containing protein 4A (ARID domain-containing protein 4A) (Retinoblastoma-binding protein 1) (RBBP-1) [MASS=142666] | *    | 3.34  | *    | *    | * | 3 | 2 | SEVATIDRRR                                 | 1 |
|                                                                                                                                                                     |      |       |      |      |   |   | 3 | TSDC[339]IGSEGM[147]K                      | 1 |
|                                                                                                                                                                     |      |       |      |      |   |   | 2 | LTDASWYTVVFDGDLRR                          | 1 |
| ARS2_HUMAN (Q9BXP5) Arsenite-resistance protein 2 [MASS=100666]                                                                                                     | *    | 2.40  | *    | *    | * | 1 | 2 | DPEQEVEKFVTSNTQELGKDK                      | 1 |
| ARSG_HUMAN (Q96EG1) Arylsulfatase G precursor (EC 3.1.6.-) (ASG) [MASS=57060]                                                                                       | *    | 6.29  | *    | *    | * | 1 | 3 | DC[330]YTDVALPLYENLNIVEQPVNLSSLAQKYAEK     | 1 |
| ASCL3_HUMAN (Q9NQ33) Achaete-scute homolog 3 (bHLH transcriptional regulator Sgn-1) [MASS=20797]                                                                    | 0.82 | 6.67  | 0.46 | 0.00 | 1 | 1 | 3 | GC[330]EYSYGPAFTR                          | 1 |

|                                                                                                                                                         |                                                |      |      |      |   |   |                                                                                                                                               |                                   |       |
|---------------------------------------------------------------------------------------------------------------------------------------------------------|------------------------------------------------|------|------|------|---|---|-----------------------------------------------------------------------------------------------------------------------------------------------|-----------------------------------|-------|
| AT12A_HUMAN (P54707) Potassium-transporting ATPase alpha chain 2 (EC 3.6.3.10) (Proton pump) (Non-gastric H(+)/K(+)-ATPase subunit alpha) [MASS=115898] | 0.00                                           | 7.97 | *    | *    | * | 4 | 3                                                                                                                                             | ADIGIAMGIAGSDAAK                  | 2     |
|                                                                                                                                                         |                                                |      |      |      |   |   | 3                                                                                                                                             | LIIVEGC[339]QRQDAVVAVTGDGVNDSPALK | 1     |
|                                                                                                                                                         |                                                |      |      |      |   |   | 2                                                                                                                                             | LIIVEGC[330]QR                    | 2     |
|                                                                                                                                                         |                                                |      |      |      |   |   | 3                                                                                                                                             | YGTDIIMGLSSTRAAELLARDGPNSLTPPK    | 1     |
|                                                                                                                                                         |                                                |      |      |      |   |   | 2                                                                                                                                             | NLEAVETLGSTSTIC[339]SDK           | 1     |
|                                                                                                                                                         |                                                |      |      |      |   |   | 2                                                                                                                                             | NIAFFSTNC[330]VEGTAR              | 1     |
|                                                                                                                                                         |                                                |      |      |      |   |   | 2                                                                                                                                             | C[339]SSILLHGK                    | 1     |
|                                                                                                                                                         |                                                |      |      |      |   |   | 1                                                                                                                                             | M[147]GKGVGR                      | 1     |
|                                                                                                                                                         |                                                |      |      |      |   |   | 2                                                                                                                                             | IAGLC[330]NR                      | 2     |
|                                                                                                                                                         |                                                |      |      |      |   |   | AT1A1_HUMAN (P05023) Sodium/potassium-transporting ATPase alpha-1 chain precursor (EC 3.6.3.9) (Sodium pump 1) (Na+/K+ATPase 1) [MASS=112895] | 1.00                              | 16.62 |
| 2                                                                                                                                                       | NLEAVETLGSTSTIC[330]SDK                        | 1    |      |      |   |   |                                                                                                                                               |                                   |       |
| 2                                                                                                                                                       | IISANGC[339]K                                  | 1    |      |      |   |   |                                                                                                                                               |                                   |       |
| 1                                                                                                                                                       | IISANGC[330]K                                  | 1    |      |      |   |   |                                                                                                                                               |                                   |       |
| 3                                                                                                                                                       | NLEAVETLGSTSTIC[330]SDKTGTLTQNR                | 1    |      |      |   |   |                                                                                                                                               |                                   |       |
| 3                                                                                                                                                       | AVAGDASESALLKC[330]IELC[339]C[339]GSVKEM[147]R | 1    |      |      |   |   |                                                                                                                                               |                                   |       |
| 2                                                                                                                                                       | AC[330]VVHGSDLK                                | 1    |      |      |   |   |                                                                                                                                               |                                   |       |
| 2                                                                                                                                                       | C[330]SSILLHGK                                 | 1    |      |      |   |   |                                                                                                                                               |                                   |       |
| 2                                                                                                                                                       | AC[339]VVHGSDLK                                | 1    |      |      |   |   |                                                                                                                                               |                                   |       |
| 2                                                                                                                                                       | IISANGC[330]K                                  | 3    |      |      |   |   |                                                                                                                                               |                                   |       |
| AT1A2_HUMAN (P50993) Sodium/potassium-transporting ATPase alpha-2 chain precursor (EC 3.6.3.9) (Sodium pump 2) (Na+/K+ATPase 2) [MASS=112265]           | 0.82                                           | 4.41 | 0.37 | 0.00 | 1 | 3 | 2                                                                                                                                             | IISSHGC[339]K                     | 1     |
|                                                                                                                                                         |                                                |      |      |      |   |   | 2                                                                                                                                             | AC[330]VVHGSDLKDMTSEQLDEILK       | 1     |
|                                                                                                                                                         |                                                |      |      |      |   |   | 3                                                                                                                                             | NIC[330]FFSTNC[330]VEGTAR         | 1     |
|                                                                                                                                                         |                                                |      |      |      |   |   | 2                                                                                                                                             | AC[330]VVHGSDLKDM[147]TSEQLDDILK  | 1     |

|                                                                                                                                                                            |      |       |      |      |    |    |   |                           |                                       |   |
|----------------------------------------------------------------------------------------------------------------------------------------------------------------------------|------|-------|------|------|----|----|---|---------------------------|---------------------------------------|---|
|                                                                                                                                                                            |      |       |      |      |    |    |   | 2                         | YNTDC[339]VQGLTHSK                    | 1 |
|                                                                                                                                                                            |      |       |      |      |    |    |   | 2                         | C[339]IELSSGSVKLMR                    | 1 |
|                                                                                                                                                                            |      |       |      |      |    |    |   | 2                         | NITFFSTNC[330]VEGTAR                  | 2 |
|                                                                                                                                                                            |      |       |      |      |    |    |   | 2                         | VLGFC[330]HYYLPEEQFPK                 | 3 |
|                                                                                                                                                                            |      |       |      |      |    |    |   | 2                         | AC[330]VIHGTDLK                       | 1 |
|                                                                                                                                                                            |      |       |      |      |    |    |   | 2                         | M[147]SVEEVC[330]R                    | 1 |
|                                                                                                                                                                            |      |       |      |      |    |    |   | 1                         | C[330]STILLQ GK                       | 1 |
|                                                                                                                                                                            |      |       |      |      |    |    |   | 2                         | SPDC[339]THDNPLETR                    | 1 |
|                                                                                                                                                                            |      |       |      |      |    |    |   | 3                         | AC[330]VIHGTDLKDF TSEQIDEILQNHTEIVFAR | 1 |
|                                                                                                                                                                            |      |       |      |      |    |    |   | 2                         | VLGFC[339]HYYLPEEQFPK                 | 1 |
|                                                                                                                                                                            |      |       |      |      |    |    |   | 2                         | MSVEEVC[330]RK                        | 1 |
|                                                                                                                                                                            |      |       |      |      |    |    |   | 2                         | YNTDC[330]VQGLTHSK                    | 2 |
|                                                                                                                                                                            |      |       |      |      |    |    |   | 2                         | IISAHGC[339]K                         | 1 |
|                                                                                                                                                                            |      |       |      |      |    |    |   | 2                         | AC[339]VIHGTDLK                       | 1 |
|                                                                                                                                                                            |      |       |      |      |    |    |   | 2                         | KYNTDC[339]VQGLTHSK                   | 1 |
|                                                                                                                                                                            |      |       |      |      |    |    |   | 2                         | M[147]SVEEVC[330]RK                   | 1 |
|                                                                                                                                                                            |      |       |      |      |    |    |   | 2                         | SPDC[330]THDNPLETR                    | 1 |
|                                                                                                                                                                            |      |       |      |      |    |    |   | 2                         | M[147]SVEEVC[339]R                    | 1 |
| AT1A3_HUMAN (P13637) Sodium/potassium-transporting ATPase alpha-3 chain (EC 3.6.3.9) (Sodium pump 3) (Na <sup>+</sup> /K <sup>+</sup> ATPase 3) (Alpha(III)) [MASS=111734] | 1.00 | 15.70 | 0.50 | 0.65 | 22 | 12 |   |                           |                                       |   |
| AT1A4_HUMAN (Q13733) Sodium/potassium-transporting ATPase alpha-4 chain (EC 3.6.3.9) (Sodium pump 4) (Na <sup>+</sup> /K <sup>+</sup> ATPase 4) [MASS=114166]              | 0.00 | 2.33  | *    | *    | *  | 1  | 3 | EVVMDDHKL TLEELSTKYSVDLTK |                                       | 1 |
|                                                                                                                                                                            |      |       |      |      |    |    |   | 2                         | YNPNVLPVQC[330]TGKR                   | 1 |
|                                                                                                                                                                            |      |       |      |      |    |    |   | 1                         | EGKPC[330]IIIK                        | 1 |
|                                                                                                                                                                            |      |       |      |      |    |    |   | 3                         | DSAQRDDM[147]IFEDC[330]GDVPSEPKER     | 1 |
|                                                                                                                                                                            |      |       |      |      |    |    |   | 3                         | DSAQRDDM[147]IFEDC[330]GDVPSEPK       | 1 |
|                                                                                                                                                                            |      |       |      |      |    |    |   | 2                         | YKDSAQRDDM[147]IFEDC[330]GDVPSEPK     | 1 |
|                                                                                                                                                                            |      |       |      |      |    |    |   | 2                         | EGKPC[330]IIIK                        | 1 |
|                                                                                                                                                                            |      |       |      |      |    |    |   | 3                         | YKDSAQRDDM[147]IFEDC[339]GDVPSEPK     | 1 |
|                                                                                                                                                                            |      |       |      |      |    |    |   | 2                         | DSAQRDDM[147]IFEDC[330]GDVPSEPK       | 1 |
|                                                                                                                                                                            |      |       |      |      |    |    |   | 2                         | YNPNVLPVQC[330]TGK                    | 4 |
| AT1B1_HUMAN (P05026) Sodium/potassium-transporting ATPase subunit beta-1 (Sodium/potassium-dependent ATPase beta-1 subunit) [MASS=35061]                                   | 1.00 | 33.99 | 0.47 | 0.25 | 16 | 6  |   |                           |                                       |   |
|                                                                                                                                                                            |      |       |      |      |    |    |   | 2                         | YNPNVLPVQC[339]TGK                    | 4 |

|                                                                                                                                                                                                                                                                              |      |      |      |      |   |   |                                                                                                                                                                                         |                            |   |
|------------------------------------------------------------------------------------------------------------------------------------------------------------------------------------------------------------------------------------------------------------------------------|------|------|------|------|---|---|-----------------------------------------------------------------------------------------------------------------------------------------------------------------------------------------|----------------------------|---|
| AT1B2_HUMAN (P14415) Sodium/potassium-transporting ATPase subunit beta-2 (Sodium/potassium-dependent ATPase beta-2 subunit) [MASS=33326]                                                                                                                                     | *    | 2.76 | *    | *    | * | 1 | 2                                                                                                                                                                                       | NDVC[339]RPGR              | 1 |
| AT2A2_HUMAN (P16615) Sarcoplasmic/endoplasmic reticulum calcium ATPase 2 (EC 3.6.3.8) (Calcium pump 2) (SERCA2) (SR Ca(2+)-ATPase 2) (Calcium-transporting ATPase sarcoplasmic reticulum type, slow twitch skeletal muscle isoform) (Endoplasmic reticulum cla [MASS=114756] | 1.00 | 4.41 | 0.89 | 0.07 | 4 | 4 | 2 C[330]THIR<br>2 NYLEPGKEC[330]VQPATK<br>2 VSFYQLSHFLQC[330]K<br>2 SM[147]SVYC[330]TPNKPSR                                                                                             | 1<br>1<br>1<br>1           |   |
| AT2B1_HUMAN (P20020) Plasma membrane calcium-transporting ATPase 1 (EC 3.6.3.8) (PMCA1) (Plasma membrane calcium pump isoform 1) (Plasma membrane calcium ATPase isoform 1) [MASS=138754]                                                                                    | 0.99 | 2.94 | 0.84 | 0.00 | 1 | 2 | 3 RDYQDVRNEIPEEALYK<br>3 C[330]GILHPGEDFLC[330]LEGKDFNR                                                                                                                                 | 1<br>1                     |   |
| AT2B2_HUMAN (Q01814) Plasma membrane calcium-transporting ATPase 2 (EC 3.6.3.8) (PMCA2) (Plasma membrane calcium pump isoform 2) (Plasma membrane calcium ATPase isoform 2) [MASS=136875]                                                                                    | 1.00 | 9.49 | 0.66 | 0.05 | 3 | 6 | 2 NESSHGGFEFGC[330]TM[147]EELR<br>3 M[147]LVTAVGVNSQTGIIFTLGAGGEEEEKK<br>2 C[330]GIHPGEDFLC[330]LEGK<br>3 ETYGDTEAIC[330]RR<br>3 EEIPEEELNEDVEEIDHAERELRR<br>2 TEC[339]GLLGFVLDLQDYEPVR | 1<br>1<br>1<br>1<br>1<br>1 |   |
| AT2B4_HUMAN (P23634) Plasma membrane calcium-transporting ATPase 4 (EC 3.6.3.8) (PMCA4) (Plasma membrane calcium pump isoform 4) (Plasma membrane calcium ATPase isoform 4) [MASS=137919]                                                                                    | 0.99 | 1.61 | 0.55 | 0.00 | 1 | 1 | 3 TEC[330]ALLGFVTDLQDYQAVR                                                                                                                                                              | 1                          |   |
| AT5F1_HUMAN (P24539) ATP synthase B chain, mitochondrial precursor (EC 3.6.3.14) [MASS=28908]                                                                                                                                                                                | *    | 2.34 | *    | *    | * | 1 | 1 C[339]IADLK<br>1 C[330]IADLK                                                                                                                                                          | 3<br>1                     |   |
| AT8A1_HUMAN (Q9Y2Q0) Probable phospholipid-transporting ATPase IA (EC 3.6.3.1) (Chromaffin granule ATPase II) (ATPase class I type 8A member 1) [MASS=131368]                                                                                                                | 0.99 | 4.64 | 0.81 | 0.00 | 1 | 4 | 1 M[147]PTM[147]RR<br>2 FC[330]NNHVSTAK<br>3 TIFINQPQLTKFC[339]NNHVSTAK<br>2 YPELYKTSQNALDFNTK                                                                                          | 1<br>1<br>1<br>1           |   |



|                                                                                                                                                                                                                          |      |       |      |      |   |   |   |                                           |   |
|--------------------------------------------------------------------------------------------------------------------------------------------------------------------------------------------------------------------------|------|-------|------|------|---|---|---|-------------------------------------------|---|
| ATAD2_HUMAN (Q6PL18) ATPase family AAA domain-containing protein 2 [MASS=158553]                                                                                                                                         | *    | 6.55  | *    | *    | * | 5 | 2 | FDSVGGLSNHIAALK                           | 1 |
|                                                                                                                                                                                                                          |      |       |      |      |   |   | 3 | LITNTAEAVLQKMDDMK                         | 1 |
|                                                                                                                                                                                                                          |      |       |      |      |   |   | 3 | SLRARNIVQSTEHLHEDNGDVEVR                  | 1 |
|                                                                                                                                                                                                                          |      |       |      |      |   |   | 2 | PRILIVGEPFGQGSHLAPAVIHAEK                 | 1 |
|                                                                                                                                                                                                                          |      |       |      |      |   |   | 2 | EILKIHDR                                  | 1 |
| ATG4B_HUMAN (Q9Y4P1) Cysteine protease ATG4B (EC 3.4.22.-) (Autophagy-related protein 4 homolog B) (hAPG4B) (Autophagin-1) (Autophagy-related cysteine endopeptidase 1) (AUT-like 1 cysteine endopeptidase) [MASS=44309] | *    | 10.94 | *    | *    | * | 2 | 3 | HC[339]FM[147]M[147]PQSLGVIGGK            | 1 |
|                                                                                                                                                                                                                          |      |       |      |      |   |   | 2 | LWFTYRKNFPAIGGTGPTSDTGWGC[339]MLR         | 1 |
| ATG7_HUMAN (O95352) Autophagy-related protein 7 (APG7-like) (Ubiquitin-activating enzyme E1-like protein) (hAGP7) [MASS=77959]                                                                                           | 0.00 | 5.12  | 0.73 | 0.00 | 1 | 2 | 2 | C[339]C[339]PAIGTLYNTNTLESFK              | 1 |
|                                                                                                                                                                                                                          |      |       |      |      |   |   | 2 | GGM[147]GPRMVNLSEC[330]M[147]DPKR         | 1 |
| ATL1_HUMAN (Q8N6G6) ADAMTS-like protein 1 precursor (ADAMTSL-1) (Punctin-1) [MASS=58416]                                                                                                                                 | 0.00 | 11.81 | 1.11 | 0.00 | 1 | 4 | 2 | TC[339]GGGASYSLRR                         | 1 |
|                                                                                                                                                                                                                          |      |       |      |      |   |   | 2 | SNRVVADQYC[330]HYYPENIK                   | 1 |
|                                                                                                                                                                                                                          |      |       |      |      |   |   | 2 | MAGPLTADFIVKIR                            | 1 |
|                                                                                                                                                                                                                          |      |       |      |      |   |   | 3 | WLAQEWSPC[330]TVTC[330]GQGLR              | 1 |
| ATM_HUMAN (Q13315) Serine-protein kinase ATM (EC 2.7.11.1) (Ataxia telangiectasia mutated) (A-T, mutated) [MASS=350642]                                                                                                  | 0.35 | 2.45  | 0.67 | 0.00 | 1 | 4 | 1 | LNDSLK                                    | 1 |
|                                                                                                                                                                                                                          |      |       |      |      |   |   | 3 | VAQSC[330]AAHFTALLYAEIYADKKSMDDEK         | 1 |
|                                                                                                                                                                                                                          |      |       |      |      |   |   | 3 | KLDASC[330]AANNPSLKLTYTEC[330]LR          | 1 |
|                                                                                                                                                                                                                          |      |       |      |      |   |   | 2 | MTTDPM[147]LAYLQPFRTSRK                   | 1 |
| ATN1_HUMAN (P54259) Atrophin-1 (Dentatorubral-pallidoluysian atrophy protein) [MASS=124773]                                                                                                                              | *    | 1.94  | *    | *    | * | 2 | 2 | ERELERSVK                                 | 1 |
|                                                                                                                                                                                                                          |      |       |      |      |   |   | 3 | VEEASTPKVVKQGR                            | 1 |
| ATP8_HUMAN (P03928) ATP synthase protein 8 (EC 3.6.3.14) (ATPase subunit 8) (A6L) [MASS=7992]                                                                                                                            | 0.89 | 16.18 | 1.02 | 0.00 | 1 | 1 | 2 | IC[330]SLHSLPPQS                          | 1 |
|                                                                                                                                                                                                                          |      |       |      |      |   |   | 1 | IC[339]SLHSLPPQS                          | 1 |
| ATPA_HUMAN (P25705) ATP synthase alpha chain, mitochondrial precursor (EC 3.6.3.14) [MASS=59750]                                                                                                                         | 1.00 | 7.59  | 1.30 | 0.03 | 7 | 2 | 1 | LYC[339]IYVAIGQK                          | 1 |
|                                                                                                                                                                                                                          |      |       |      |      |   |   | 2 | LYC[339]IYVAIGQK                          | 2 |
|                                                                                                                                                                                                                          |      |       |      |      |   |   | 1 | LYC[330]IYVAIGQK                          | 2 |
|                                                                                                                                                                                                                          |      |       |      |      |   |   | 3 | YTIVVSATASDAAPLQYLAPYSGC[339]SM[147]GEYFR | 1 |
|                                                                                                                                                                                                                          |      |       |      |      |   |   | 2 | LYC[330]IYVAIGQK                          | 1 |
| ATPB_HUMAN (P06576) ATP synthase beta chain, mitochondrial precursor (EC 3.6.3.14) [MASS=56559]                                                                                                                          | *    | 6.62  | *    | *    | * | 1 | 3 | AIAELGIYPAVDPLDSTSRIM[147]DPNIVGSEHYDVAR  | 1 |

|                                                                                                                                                                              |                        |       |      |      |   |   |   |                                              |   |
|------------------------------------------------------------------------------------------------------------------------------------------------------------------------------|------------------------|-------|------|------|---|---|---|----------------------------------------------|---|
| ATPG_HUMAN (P36542) ATP synthase gamma chain, mitochondrial precursor (EC 3.6.3.14) [MASS=32996]                                                                             | 1.00                   | 11.07 | 1.19 | 0.04 | 4 | 3 | 1 | GLC[330]GAIHSSIAK                            | 1 |
|                                                                                                                                                                              |                        |       |      |      |   |   | 2 | HLLIGVSSDR                                   | 1 |
|                                                                                                                                                                              |                        |       |      |      |   |   | 2 | SEVATLTAAGK                                  | 1 |
|                                                                                                                                                                              |                        |       |      |      |   |   | 2 | GLC[330]GAIHSSIAK                            | 2 |
| ATR_HUMAN (Q13535) Serine/threonine-protein kinase ATR (EC 2.7.11.1) (Ataxia telangiectasia and Rad3-related protein) (FRAP-related protein 1) [MASS=301365]                 | *                      | 5.14  | *    | *    | * | 7 | 2 | GLC[339]GAIHSSIAK                            | 1 |
|                                                                                                                                                                              |                        |       |      |      |   |   | 3 | YATDSETVEPIISQLVTVLLKGC[330]QDANSQAR         | 1 |
|                                                                                                                                                                              |                        |       |      |      |   |   | 3 | HLVEM[147]DTDQLKLYEEPLSK                     | 1 |
|                                                                                                                                                                              |                        |       |      |      |   |   | 2 | KMALNSLM[147]SLMKLMGPK                       | 1 |
|                                                                                                                                                                              |                        |       |      |      |   |   | 2 | MALNSLSMLMKLMGPKHVSSVR                       | 1 |
|                                                                                                                                                                              |                        |       |      |      |   |   | 2 | GSC[339]IEFSNWIITRLLR                        | 1 |
|                                                                                                                                                                              |                        |       |      |      |   |   | 3 | FLDLIPQDTLAVASFRSKAYTR                       | 1 |
| 2                                                                                                                                                                            | FLDLIPQDTLAVASFRSKAYTR | 1     |      |      |   |   |   |                                              |   |
| 1                                                                                                                                                                            | ISLKGSDGK              | 2     |      |      |   |   |   |                                              |   |
| ATS10_HUMAN (Q9H324) ADAMTS-10 precursor (EC 3.4.24.-) (A disintegrin and metalloproteinase with thrombospondin motifs 10) (ADAM-TS 10) (ADAM-TS10) (Fragment) [MASS=118072] | 0.00                   | 3.99  | 2.85 | 0.00 | 1 | 2 | 2 | C[339]SAQC[339]AGGSQVQAVEC[339]R             | 1 |
|                                                                                                                                                                              |                        |       |      |      |   |   | 3 | GQDPAKLMAAHITM[147]KTNPFWSSC[330]NR          | 1 |
| ATS16_HUMAN (Q8TE57) ADAMTS-16 precursor (EC 3.4.24.-) (A disintegrin and metalloproteinase with thrombospondin motifs 16) (ADAM-TS 16) (ADAM-TS16) [MASS=136187]            | 0.00                   | 3.43  | 0.86 | 0.00 | 1 | 2 | 3 | NEPC[339]DTLGFAPISGMC[330]SKYR               | 1 |
|                                                                                                                                                                              |                        |       |      |      |   |   | 3 | YMPQPPKEDLFILPDEYKSC[339]LR                  | 1 |
| ATS17_HUMAN (Q8TE56) ADAMTS-17 precursor (EC 3.4.24.-) (A disintegrin and metalloproteinase with thrombospondin motifs 17) (ADAM-TS 17) (ADAM-TS17) [MASS=121099]            | 0.00                   | 4.66  | 0.29 | 0.00 | 1 | 2 | 2 | GRNPSDLSSWSSC[330]SRDDLENFLK                 | 1 |
|                                                                                                                                                                              |                        |       |      |      |   |   | 3 | TPIPEHVDGDWSPWGAWSM[147]C[330]SRTC[330]GTGAR | 1 |
| ATS18_HUMAN (Q8TE60) ADAMTS-18 precursor (EC 3.4.24.-) (A disintegrin and metalloproteinase with thrombospondin motifs 18) (ADAM-TS 18) (ADAM-TS18) [MASS=135140]            | 0.00                   | 4.34  | 0.58 | 0.00 | 1 | 2 | 3 | KAEGNIMSPTLTGNNGVFSWSSC[339]SRQYLK           | 1 |
|                                                                                                                                                                              |                        |       |      |      |   |   | 3 | AEGNIMSPTLTGNNGVFSWSSC[330]SR                | 1 |
| ATS20_HUMAN (P59510) ADAMTS-20 precursor (EC 3.4.24.-) (A disintegrin and metalloproteinase with thrombospondin motifs 20) (ADAM-TS 20) (ADAM-TS20) [MASS=214655]            | *                      | 1.41  | *    | *    | * | 2 | 3 | SSEALEPM[147]PFR                             | 1 |
|                                                                                                                                                                              |                        |       |      |      |   |   | 2 | VNEFGEVFPQSHHFSR                             | 1 |

|                                                                                                                                                                                                                                                                             |      |      |      |      |   |   |                                                                                                                         |                                  |   |
|-----------------------------------------------------------------------------------------------------------------------------------------------------------------------------------------------------------------------------------------------------------------------------|------|------|------|------|---|---|-------------------------------------------------------------------------------------------------------------------------|----------------------------------|---|
| ATS8_HUMAN (Q9UP79) ADAMTS-8 precursor (EC 3.4.24.-) (A disintegrin and metalloproteinase with thrombospondin motifs 8) (ADAM-TS 8) (ADAM-TS8) (METH-2) (METH-8) [MASS=96671]                                                                                               | *    | 1.46 | *    | *    | * | 1 | 2                                                                                                                       | C[330]GVC[339]GGKGNCS[330]RK     | 1 |
| ATS9_HUMAN (Q9P2N4) ADAMTS-9 precursor (EC 3.4.24.-) (A disintegrin and metalloproteinase with thrombospondin motifs 9) (ADAM-TS 9) (ADAM-TS9) [MASS=216556]                                                                                                                | *    | 0.88 | *    | *    | * | 1 | 3                                                                                                                       | TPDSGLAQHPFQNEYR                 | 1 |
| AUMH_HUMAN (Q13825) Methylglutaconyl-CoA hydratase, mitochondrial precursor (EC 4.2.1.18) (AU-specific RNA-binding enoyl-CoA hydratase) (AU-binding protein/enoyl-CoA hydratase) [MASS=35608]                                                                               | *    | 6.78 | *    | *    | * | 1 | 3                                                                                                                       | LVAAC[339]SAWLC[330]PGLRLPGSLAGR | 1 |
| B3A4_HUMAN (Q96Q91) Anion exchange protein 4 (Anion exchanger 4) (Solute carrier family 4 member 9) (Sodium bicarbonate cotransporter 5) [MASS=108247]                                                                                                                      | 0.00 | 6.82 | 0.19 | 0.00 | 1 | 3 | 3 FFC[330]LLLGPC[339]MLGKGYHEMGR<br>2 DDIVSM[147]DLGLINASLLPPEC[330]TR<br>3 STPAAIIFPLMLLGLVGVKALER                     | 1<br>1<br>1                      |   |
| B3GN3_HUMAN (Q9Y2A9) UDP-GlcNAc:betaGal beta-1,3-N-acetylglucosaminyltransferase 3 (EC 2.4.1.-) (Beta3Gn-T3) (BGnT-3) (Core 1 extending beta-1,3-N-acetylglucosaminyltransferase) (Core1-beta3GlcNAcT) (Beta-1,3-galactosyltransferase 8) (Beta-1,3-GalTase 8) [MASS=42515] | *    | 5.65 | *    | *    | * | 1 | 2                                                                                                                       | C[330]AQPVFLLLVIKSSPSNYVRR       | 1 |
| BARD1_HUMAN (Q99728) BRCA1-associated RING domain protein 1 (BARD-1) [MASS=86619]                                                                                                                                                                                           | 0.00 | 9.65 | 0.66 | 0.00 | 1 | 4 | 3 DHAGWTPLHEAC[330]NHGHLK<br>2 NAVNIFGLR<br>3 C[330]MLGILNGC[339]WILKFEWVKAC[339]LR<br>2 NSNM[147]SDEFISLSPGTPPSTLSSSYR | 1<br>1<br>1<br>1                 |   |
| BAT5_HUMAN (O95870) Protein BAT5 (HLA-B-associated transcript 5) (Protein G5) [MASS=63112]                                                                                                                                                                                  | *    | 8.26 | *    | *    | * | 2 | 3 ALEKHADSILALASVFWWSISYSSPF AFFYLYR<br>2 QHLNLLNNAEQLC[339]R                                                           | 1<br>1                           |   |

|                                                                                                                                                                                                                                                                             |      |       |      |      |   |   |   |                                                                    |        |
|-----------------------------------------------------------------------------------------------------------------------------------------------------------------------------------------------------------------------------------------------------------------------------|------|-------|------|------|---|---|---|--------------------------------------------------------------------|--------|
| BC11B_HUMAN (Q9C0K0) B-cell lymphoma/leukemia 11B (B-cell CLL/lymphoma 11B) (Radiation-induced tumor suppressor gene 1 protein) (hRit1) (COUP-TF-interacting protein 2) [MASS=95519]                                                                                        | *    | 3.13  | *    | *    | * | 2 | 2 | GIC[339]PKQENIAGPC[330]R<br>HM[147]KTHGQIGKEVYR                    | 1<br>1 |
| BCAR3_HUMAN (O75815) Breast cancer anti-estrogen resistance protein 3 (SH2 domain-containing protein 3B) (Novel SH2-containing protein 2) [MASS=92565]                                                                                                                      | *    | 6.42  | *    | *    | * | 3 | 2 | GNLLRNKEK                                                          | 2      |
| BCL6B_HUMAN (Q8N143) B-cell CLL/lymphoma 6 member B protein (Bcl6-associated zinc finger protein) (Zinc finger protein 62) [MASS=51618]                                                                                                                                     | *    | 5.21  | *    | *    | * | 1 | 3 | C[339]ETC[330]GSRFVQVAHLRAHVLIHTGEK                                | 1      |
| BCN1_HUMAN (Q14457) Beclin-1 (Coiled-coil myosin-like BCL2-interacting protein) (Protein GT197) [MASS=51896]                                                                                                                                                                | *    | 6.00  | *    | *    | * | 1 | 3 | FFWDNKFHDHAM[147]VAFLDC[330]VQQFKEEVEK                             | 1      |
| BCOR_HUMAN (Q6W2J9) BCoR protein (BCL-6 corepressor) [MASS=192187]                                                                                                                                                                                                          | 0.00 | 3.25  | 1.62 | 0.00 | 1 | 2 | 2 | SWSEESLKPSDNEQGLPVFSGSPPMK<br>YSLNMYKALLPQQSYSLAQPLYSPVC[330]TNGER | 1<br>1 |
| BDH_HUMAN (Q02338) D-beta-hydroxybutyrate dehydrogenase, mitochondrial precursor (EC 1.1.1.30) (BDH) (3-hydroxybutyrate dehydrogenase) [MASS=38157]                                                                                                                         | *    | 16.91 | *    | *    | * | 3 | 2 | M[147]ANPARSPYC[330]ITKFGVEAFSDC[330]LR                            | 1      |
|                                                                                                                                                                                                                                                                             |      |       |      |      |   |   | 2 | M[147]QIM[147]THLPGAISDMIYIR                                       | 1      |
|                                                                                                                                                                                                                                                                             |      |       |      |      |   |   | 3 | VVNISMLGRMANPAR                                                    | 1      |
| BGAT_HUMAN (P16442) Histo-blood group ABO system transferase (NAGAT) [Includes: Glycoprotein-fucosylgalactoside alpha-N-acetylgalactosaminyltransferase (EC 2.4.1.40) (Fucosylglycoprotein alpha-N-acetylgalactosaminyltransferase) (Histo-blood group A trans [MASS=40934] | *    | 6.21  | *    | *    | * | 1 | 3 | PMILFLIMLVLVFGYGVLSPR                                              | 1      |
| BIG1_HUMAN (Q9Y6D6) Brefeldin A-inhibited guanine nucleotide-exchange protein 1 (Brefeldin A-inhibited GEP 1) (p200 ARF-GEP1) (p200 ARF guanine nucleotide exchange factor) [MASS=208708]                                                                                   | *    | 2.70  | *    | *    | * | 2 | 2 | FNKEVMYAYVDQHDFSGK                                                 | 1      |
|                                                                                                                                                                                                                                                                             |      |       |      |      |   |   | 3 | NLINQTTAKATLTQMLNVIFARMENQALQEAK                                   | 1      |

|                                                                                                                                                                                                                                                                              |                         |      |       |      |   |   |   |                                          |   |
|------------------------------------------------------------------------------------------------------------------------------------------------------------------------------------------------------------------------------------------------------------------------------|-------------------------|------|-------|------|---|---|---|------------------------------------------|---|
| BIG2_HUMAN (Q9Y6D5) Brefeldin A-inhibited guanine nucleotide-exchange protein 2 (Brefeldin A-inhibited GEP 2) [MASS=202092]                                                                                                                                                  | *                       | 5.94 | *     | *    | * | 5 | 2 | QRLGTAAPPKANFIEADK                       | 1 |
|                                                                                                                                                                                                                                                                              |                         |      |       |      |   |   | 3 | LTDQEIGDGKGLDMAR                         | 1 |
|                                                                                                                                                                                                                                                                              |                         |      |       |      |   |   | 3 | FKAHASM[147]YYPYLC[330]EIM[147]QFDLPELR  | 1 |
|                                                                                                                                                                                                                                                                              |                         |      |       |      |   |   | 2 | VLQEYTSDDMNVAPGDR                        | 1 |
|                                                                                                                                                                                                                                                                              |                         |      |       |      |   |   | 3 | RC[339]SVTSMESTVSSGTQTTVQDDPEQFEVIK      | 1 |
| BIRC6_HUMAN (Q9NR09) Baculoviral IAP repeat-containing protein 6 (Ubiquitin-conjugating BIR-domain enzyme apollon) [MASS=527606]                                                                                                                                             | 0.00                    | 2.65 | 35.37 | 0.00 | 1 | 7 | 2 | RVEIMAQC[339]EEWIADIQQYSSDK              | 1 |
|                                                                                                                                                                                                                                                                              |                         |      |       |      |   |   | 2 | M[147]KTC[330]VDTYTNR                    | 1 |
|                                                                                                                                                                                                                                                                              |                         |      |       |      |   |   | 2 | M[147]PITADLVAPILR                       | 1 |
|                                                                                                                                                                                                                                                                              |                         |      |       |      |   |   | 2 | HFYLKR                                   | 1 |
|                                                                                                                                                                                                                                                                              |                         |      |       |      |   |   | 3 | ETFTSWPHVGYRWAQPDMAQAGFYHQPASSGDDR       | 1 |
|                                                                                                                                                                                                                                                                              |                         |      |       |      |   |   | 3 | RVEIMAQC[330]EEWIADIQQYSSDKR             | 1 |
| 2                                                                                                                                                                                                                                                                            | RPTLAWLEDSSSC[330]SDIPK | 1    |       |      |   |   |   |                                          |   |
| BIRC7_HUMAN (Q96CA5) Baculoviral IAP repeat-containing protein 7 (Kidney inhibitor of apoptosis protein) (KIAP) (Melanoma inhibitor of apoptosis protein) (ML-IAP) (Livin) [MASS=32798]                                                                                      | *                       | 5.70 | *     | *    | * | 1 | 3 | PLTEEEEEEGAGATLSR                        | 1 |
| BPL1_HUMAN (P50747) Biotin--protein ligase (EC 6.3.4.-) (Biotin apo-protein ligase) [Includes: Biotin--[methylmalonyl-CoA-carboxytransferase] ligase (EC 6.3.4.9); Biotin--[propionyl-CoA-carboxylase [ATP-hydrolyzing]] ligase (EC 6.3.4.10) (Holocarboxylase) [MASS=80759] | *                       | 2.48 | *     | *    | * | 1 | 3 | YEVLR EILTTLGLSC[339]DMK                 | 1 |
| BRCA2_HUMAN (P51587) Breast cancer type 2 susceptibility protein (Fanconi anemia group D1 protein) [MASS=384223]                                                                                                                                                             | *                       | 1.73 | *     | *    | * | 3 | 2 | EAC[339]KDLELAC[339]ETIEITAAPK           | 1 |
|                                                                                                                                                                                                                                                                              |                         |      |       |      |   |   | 3 | EQGLTLPYQSPVKELDKFK                      | 1 |
|                                                                                                                                                                                                                                                                              |                         |      |       |      |   |   | 2 | AGKEEFYRALC[339]DTPGVDPK                 | 1 |
| BRD1_HUMAN (O95696) Bromodomain-containing protein 1 (BR140-like protein) [MASS=119519]                                                                                                                                                                                      | *                       | 2.36 | *     | *    | * | 1 | 3 | ANC[330]YTAFHVTC[339]AQKAGLYM[147]KMEPVK | 1 |
| BRWD2_HUMAN (Q9BZH6) Bromodomain and WD repeat domain-containing protein 2 (WD repeat protein 11) [MASS=136684]                                                                                                                                                              | 0.00                    | 8.25 | 0.89  | 0.17 | 3 | 5 | 3 | LSNPLDIC[330]YDVLC[330]ENAYFQKFQLER      | 1 |
|                                                                                                                                                                                                                                                                              |                         |      |       |      |   |   | 3 | LVATNMIANGKLAEGVQLLC[330]LIDKAADAC[339]R | 1 |
|                                                                                                                                                                                                                                                                              |                         |      |       |      |   |   | 3 | WVDHLC[330]SPQVNQK                       | 1 |
|                                                                                                                                                                                                                                                                              |                         |      |       |      |   |   | 2 | ILDVDWC[330]TSDK                         | 1 |
|                                                                                                                                                                                                                                                                              |                         |      |       |      |   |   | 2 | ALLVLLSLGC[330]FFSVAETLHSMR              | 1 |
|                                                                                                                                                                                                                                                                              |                         |      |       |      |   |   | 2 | ALLVLLSLGC[330]FFSVAETLHSM[147]R         | 1 |
| BTBD8_HUMAN (Q5XKL5) BTB/POZ domain-containing protein 8 [MASS=42774]                                                                                                                                                                                                        | 0.00                    | 6.08 | 0.98  | 0.00 | 1 | 1 | 2 | M[147]ARC[330]GEGSAAPMVLLGSAGVC[330]SK   | 1 |

|                                                                                                                                                                                                                                                                              |      |      |      |      |   |   |   |                                                  |   |
|------------------------------------------------------------------------------------------------------------------------------------------------------------------------------------------------------------------------------------------------------------------------------|------|------|------|------|---|---|---|--------------------------------------------------|---|
| BTBD9_HUMAN (Q96Q07) BTB/POZ domain-containing protein 9 [MASS=69187]                                                                                                                                                                                                        | 0.00 | 4.41 | 0.10 | 0.00 | 1 | 1 | 2 | IVGTHNTANEFVHC[330]VHFEC[330]PEQQSSQK            | 1 |
| BUB1_HUMAN (O43683) Mitotic checkpoint serine/threonine-protein kinase BUB1 (EC 2.7.11.1) (hBUB1) (BUB1A) [MASS=122374]                                                                                                                                                      | *    | 5.62 | *    | *    | * | 4 | 3 | PVSSYPNTFEWQC[330]KLPAIK                         | 1 |
|                                                                                                                                                                                                                                                                              |      |      |      |      |   |   | 2 | EGC[330]JETHK                                    | 1 |
|                                                                                                                                                                                                                                                                              |      |      |      |      |   |   | 3 | SSGAWGVNKKISSLSSAFHFVFDGK                        | 1 |
|                                                                                                                                                                                                                                                                              |      |      |      |      |   |   | 3 | HEQWVNEDR                                        | 1 |
| C163B_HUMAN (Q9NR16) Scavenger receptor cysteine-rich type 1 protein M160 precursor (CD163 antigen-like 1) (CD163b antigen) [MASS=159263]                                                                                                                                    | 0.20 | 2.27 | 1.26 | 0.00 | 1 | 2 | 2 | QLGC[339]GENGVVSLAPLSK                           | 1 |
|                                                                                                                                                                                                                                                                              |      |      |      |      |   |   | 2 | SDAGVIC[330]SDKADLDR                             | 1 |
| C1QBP_HUMAN (Q07021) Complement component 1 Q subcomponent-binding protein, mitochondrial precursor (Glycoprotein gC1qBP) (C1qBP) (GC1q-R protein) (Hyaluronan-binding protein 1) (Mitochondrial matrix protein p32) (p33) [MASS=31362]                                      | 0.99 | 9.57 | 1.11 | 0.05 | 2 | 1 | 3 | ALVLDC[339]HYPEDEVGQEDEAESDIFSIR                 | 2 |
| C560_HUMAN (Q99643) Succinate dehydrogenase cytochrome b560 subunit, mitochondrial precursor (Integral membrane protein CII-3) (QPs1) (QPs-1) (Succinate dehydrogenase complex subunit C) (Succinate-ubiquinone oxidoreductase cytochrome B large subunit) (CY [MASS=18610]) | 1.00 | 7.69 | 1.03 | 0.02 | 4 | 1 | 2 | SLC[330]LGPALIHTAK                               | 2 |
|                                                                                                                                                                                                                                                                              |      |      |      |      |   |   | 2 | SLC[339]LGPALIHTAK                               | 2 |
| CABL2_HUMAN (Q9BTV7) CDK5 and ABL1 enzyme substrate 2 (Interactor with CDK3 2) (Ik3-2) [MASS=52235]                                                                                                                                                                          | 0.00 | 3.56 | *    | *    | * | 1 | 2 | C[339]SLEFLEDAVGC[330]APAQR                      | 1 |
| CAC1E_HUMAN (Q15878) Voltage-dependent R-type calcium channel subunit alpha-1E (Voltage-gated calcium channel subunit alpha Cav2.3) (Calcium channel, L type, alpha-1 polypeptide, isoform 6) (Brain calcium channel II) (BII) [MASS=261728]                                 | *    | 3.59 | *    | *    | * | 4 | 3 | SNSSWLEEFM[147]ERSSENTYKSR                       | 1 |
|                                                                                                                                                                                                                                                                              |      |      |      |      |   |   | 2 | HHM[147]SM[147]WEPRSSHLRER                       | 1 |
|                                                                                                                                                                                                                                                                              |      |      |      |      |   |   | 3 | ETGKAM[147]VPHSSMFIFSTTNPIRR                     | 1 |
|                                                                                                                                                                                                                                                                              |      |      |      |      |   |   | 3 | NAPMFQRMEPSSLPQEIIANAK                           | 1 |
| CAC1F_HUMAN (O60840) Voltage-dependent L-type calcium channel subunit alpha-1F (Voltage-gated calcium channel subunit alpha Cav1.4) [MASS=219494]                                                                                                                            | *    | 3.10 | *    | *    | * | 3 | 3 | M[147]HKTC[339]YFLGSDMEAEEDPSPC[330]ASSGSGR      | 1 |
|                                                                                                                                                                                                                                                                              |      |      |      |      |   |   | 3 | PGDAPHTGGKPGGFDVKALR                             | 1 |
|                                                                                                                                                                                                                                                                              |      |      |      |      |   |   | 3 | QC[339]VEYALKAQPLR                               | 1 |
|                                                                                                                                                                                                                                                                              |      |      |      |      |   |   | 3 | M[147]HKTC[330]YFLGSDM[147]EAEEDPSPC[339]ASSGSGR | 1 |

|                                                                                                                                                                                                               |                   |      |      |      |   |   |   |                                                  |   |
|---------------------------------------------------------------------------------------------------------------------------------------------------------------------------------------------------------------|-------------------|------|------|------|---|---|---|--------------------------------------------------|---|
| CAC1G_HUMAN (O43497) Voltage-dependent T-type calcium channel subunit alpha-1G (Voltage-gated calcium channel subunit alpha Cav3.1) (Cav3.1c) (NBR13) [MASS=262470]                                           | *                 | 3.24 | *    | *    | * | 5 | 2 | QRESQLMREQR                                      | 1 |
|                                                                                                                                                                                                               |                   |      |      |      |   |   | 2 | HKYNFDNLGQALM[147]SLFVLASK                       | 1 |
|                                                                                                                                                                                                               |                   |      |      |      |   |   | 2 | M[147]DEEEDGAGAEESGQPR                           | 1 |
|                                                                                                                                                                                                               |                   |      |      |      |   |   | 1 | ILGM[147]LR                                      | 1 |
|                                                                                                                                                                                                               |                   |      |      |      |   |   | 2 | ALRPDDPPLDGDDADDEGNLSK                           | 1 |
| CAC2D_HUMAN (P54289) Dihydropyridine-sensitive L-type calcium channel subunits alpha-2/delta precursor [Contains: L-type calcium channel subunit alpha-2; L-type calcium channel subunit delta] [MASS=123183] | 0.99              | 8.16 | 0.72 | 0.03 | 2 | 4 | 3 | TSIRDPC[330]AGPVC[330]DC[330]KR                  | 1 |
|                                                                                                                                                                                                               |                   |      |      |      |   |   | 3 | SFSGVLDC[330]GNC[339]SRIFHGEK                    | 1 |
|                                                                                                                                                                                                               |                   |      |      |      |   |   | 3 | GTC[339]PC[339]DTRLLIQAEQTS DGPNPC[330]DM[147]VK | 1 |
|                                                                                                                                                                                                               |                   |      |      |      |   |   | 3 | FTLC[330]PNGYYFAIDPNGYVLLHPNLQPK                 | 1 |
| CAD15_HUMAN (P55291) Muscle-cadherin precursor (M-cadherin) (Cadherin-15) (Cadherin-14) [MASS=88915]                                                                                                          | *                 | 3.81 | *    | *    | * | 2 | 3 | DYDPEDWLQVDAATGR                                 | 1 |
|                                                                                                                                                                                                               |                   |      |      |      |   |   | 3 | HPTALSPLGPPPLR                                   | 1 |
| CALX_HUMAN (P27824) Calnexin precursor (Major histocompatibility complex class I antigen-binding protein p88) (p90) (IP90) [MASS=67568]                                                                       | 0.99              | 2.03 | 0.96 | 0.00 | 1 | 1 | 2 | C[330]GEDYKLHFIFR                                | 1 |
| CAPS1_HUMAN (Q9ULU8) Calcium-dependent secretion activator 1 (Calcium-dependent activator protein for secretion 1) (CAPS-1) [MASS=152786]                                                                     | *                 | 3.47 | *    | *    | * | 3 | 3 | LQGVLDSTLNSKTYETIR                               | 1 |
|                                                                                                                                                                                                               |                   |      |      |      |   |   | 3 | GC[339]HRHLC[339]YLRDLLER                        | 1 |
|                                                                                                                                                                                                               |                   |      |      |      |   |   | 2 | FVTILEGLAKLSR                                    | 1 |
| CAR10_HUMAN (Q9BWT7) Caspase recruitment domain-containing protein 10 (CARD-containing MAGUK protein 3) (Carma 3) [MASS=115945]                                                                               | *                 | 5.43 | *    | *    | * | 5 | 2 | IEGVRHRLAR                                       | 1 |
|                                                                                                                                                                                                               |                   |      |      |      |   |   | 3 | ILLDILEHDWR                                      | 1 |
|                                                                                                                                                                                                               |                   |      |      |      |   |   | 3 | LSILFPFPPSAGSILR                                 | 1 |
|                                                                                                                                                                                                               |                   |      |      |      |   |   | 1 | PEGLLAR                                          | 1 |
|                                                                                                                                                                                                               |                   |      |      |      |   |   | 2 | ARGPPPGAEKEK                                     | 1 |
| CAR11_HUMAN (Q9BXL7) Caspase recruitment domain-containing protein 11 (CARD-containing MAGUK protein 3) (Carma 1) [MASS=132641]                                                                               | *                 | 3.75 | *    | *    | * | 3 | 3 | DLIKSNIYPIVLFIR                                  | 1 |
|                                                                                                                                                                                                               |                   |      |      |      |   |   | 3 | SRSSIMSITAEPGNDIVRR                              | 1 |
|                                                                                                                                                                                                               |                   |      |      |      |   |   | 1 | SLPDSK                                           | 4 |
| CASC5_HUMAN (Q8NG31) Protein CASC5 (Cancer susceptibility candidate gene 5 protein) (ALL1-fused gene from chromosome 15q14) (AF15q14) (D40/AF15q14 protein) [MASS=265191]                                     | *                 | 5.25 | *    | *    | * | 7 | 3 | TIYSGEENMDITKSHTV AIDNQIFK                       | 1 |
|                                                                                                                                                                                                               |                   |      |      |      |   |   | 3 | KNEIKFSDTTQDR                                    | 1 |
|                                                                                                                                                                                                               |                   |      |      |      |   |   | 3 | TVFYSSC[339]NDAMEMTKC[339]LSNMREEK               | 1 |
|                                                                                                                                                                                                               |                   |      |      |      |   |   | 3 | AQVESC[339]QLNNR                                 | 1 |
|                                                                                                                                                                                                               |                   |      |      |      |   |   | 3 | TIVFSEDDKNDM[147]DITKSYTIEINHR                   | 1 |
|                                                                                                                                                                                                               |                   |      |      |      |   |   | 3 | TPSSC[330]SSSLDSIK                               | 1 |
| 1                                                                                                                                                                                                             | VRRC[339]SLGIFLPR | 1    |      |      |   |   |   |                                                  |   |

|                                                                                                                                                                                                                                                                              |      |       |      |      |   |   |   |                                         |   |
|------------------------------------------------------------------------------------------------------------------------------------------------------------------------------------------------------------------------------------------------------------------------------|------|-------|------|------|---|---|---|-----------------------------------------|---|
| CASR_HUMAN (P41180) Extracellular calcium-sensing receptor precursor (CaSR) (Parathyroid Cell calcium-sensing receptor) [MASS=120673]                                                                                                                                        | 0.00 | 3.90  | 0.82 | 0.00 | 1 | 3 | 2 | NTIEEVRC[339]STAAHAFK                   | 1 |
|                                                                                                                                                                                                                                                                              |      |       |      |      |   |   | 3 | C[339]PDDFWSNENHTSC[330]IAK             | 1 |
|                                                                                                                                                                                                                                                                              |      |       |      |      |   |   | 2 | LLSNKNQFK                               | 1 |
| CATL2_HUMAN (O60911) Cathepsin L2 precursor (EC 3.4.22.43) (Cathepsin V) (Cathepsin U) [MASS=37329]                                                                                                                                                                          | *    | 5.69  | *    | *    | * | 1 | 2 | HGFTMAMNAFGDM[147]TNEEFR                | 1 |
| CATS_HUMAN (P25774) Cathepsin S precursor (EC 3.4.22.27) [MASS=37495]                                                                                                                                                                                                        | *    | 8.76  | *    | *    | * | 1 | 3 | LVC[339]VLLVC[339]SSAVAQLHKDPTLDHWHHLWK | 1 |
| CCD37_HUMAN (Q494V2) Coiled-coil domain-containing protein 37 [MASS=71117]                                                                                                                                                                                                   | *    | 8.51  | *    | *    | * | 3 | 2 | QWVTTM[147]M[147]M[147]SITK             | 1 |
|                                                                                                                                                                                                                                                                              |      |       |      |      |   |   | 2 | NSLESM[147]NISSSSSTEENPKKQAR            | 1 |
|                                                                                                                                                                                                                                                                              |      |       |      |      |   |   | 3 | M[147]SEIPSTIVSKNM[147]TNDK             | 1 |
| CCNG1_HUMAN (P51959) Cyclin-G1 (Cyclin-G) [MASS=34074]                                                                                                                                                                                                                       | *    | 16.95 | *    | *    | * | 2 | 2 | VC[330]GLRLIESAHDNGLRMTAR               | 1 |
|                                                                                                                                                                                                                                                                              |      |       |      |      |   |   | 3 | MIEVLTTTDSQKLLHQLNALLEQESRC[339]QPK     | 1 |
| CCR6_HUMAN (P51684) C-C chemokine receptor type 6 (C-C CKR-6) (CC-CKR-6) (CCR6) (LARC receptor) (GPR-CY4) (GPRCY4) (Chemokine receptor-like 3) (CKR-L3) (DRY6) (G-protein coupled receptor 29) (CD196 antigen) [MASS=42494]                                                  | 0.00 | 5.61  | 0.17 | 0.00 | 1 | 1 | 2 | GIYAINFNC[330]GMLLLTC[330]ISM[147]DR    | 1 |
| CD59_HUMAN (P13987) CD59 glycoprotein precursor (Membrane attack complex inhibition factor) (MACIF) (MAC-inhibitory protein) (MAC-IP) (Protectin) (MEM43 antigen) (Membrane inhibitor of reactive lysis) (MIRL) (20 kDa homologous restriction factor) (HRF-20) [MASS=14177] | 1.00 | 18.75 | 0.54 | 0.19 | 4 | 2 | 3 | LRENELTYYC[330]C[330]JK                 | 1 |
|                                                                                                                                                                                                                                                                              |      |       |      |      |   |   | 2 | LRENELTYYC[330]C[330]JK                 | 1 |
|                                                                                                                                                                                                                                                                              |      |       |      |      |   |   | 2 | FEHC[330]NFNDVTTR                       | 1 |
|                                                                                                                                                                                                                                                                              |      |       |      |      |   |   | 2 | LRENELTYYC[339]C[339]JK                 | 1 |
| CD81_HUMAN (P60033) CD81 antigen (26 kDa cell surface protein TAPA-1) (Target of the antiproliferative antibody 1) (Tetraspanin-28) (Tspan-28) [MASS=25809]                                                                                                                  | 1.00 | 16.53 | 0.48 | 0.16 | 6 | 2 | 2 | TFHETLDC[339]C[339]GSSTLTALTTSVLK       | 1 |
|                                                                                                                                                                                                                                                                              |      |       |      |      |   |   | 2 | TFHETLDC[330]C[330]GSSTLTALTTSVLK       | 2 |
|                                                                                                                                                                                                                                                                              |      |       |      |      |   |   | 2 | NNLC[330]PSGSNIISNLFK                   | 2 |
|                                                                                                                                                                                                                                                                              |      |       |      |      |   |   | 2 | NNLC[339]PSGSNIISNLFK                   | 1 |
| CD82_HUMAN (P27701) CD82 antigen (Inducible membrane protein R2) (C33 antigen) (IA4) (Metastasis suppressor Kangai 1) (Suppressor of tumorigenicity-6) (Tetraspanin-27) (Tspan-27) [MASS=29625]                                                                              | 0.00 | 7.49  | 1.07 | 0.00 | 1 | 1 | 2 | TQSGNHPEDWPVYQEGC[330]M[147]EK          | 1 |



|                                                                                                                                                                                              |      |       |      |      |   |   |             |                                                                                      |             |
|----------------------------------------------------------------------------------------------------------------------------------------------------------------------------------------------|------|-------|------|------|---|---|-------------|--------------------------------------------------------------------------------------|-------------|
| CD86_HUMAN (P42081) T-lymphocyte activation antigen CD86 precursor (Activation B7-2 antigen) (CTLA-4 counter-receptor B7.2) (B70) (FUN-1) (BU63) [MASS=37696]                                | *    | 8.51  | *    | *    | * | 2 | 3<br>2<br>2 | EKFDSVHSKYMGR<br>C[339]GTNTM[147]JERESEQTK<br>C[339]GTNTMERESEQTK                    | 1<br>1<br>1 |
| CD9_HUMAN (P21926) CD9 antigen (p24) (Leukocyte antigen MIC3) (Motility-related protein) (MRP-1) (Tetraspanin-29) (Tspan-29) [MASS=25285]                                                    | 1.00 | 11.01 | 0.99 | 0.10 | 3 | 1 | 3<br>3      | AIHYALNC[339]C[339]GLAGGVEQFISDIC[339]PK<br>AIHYALNC[330]C[330]GLAGGVEQFISDIC[330]PK | 1<br>2      |
| CDC42_HUMAN (P60953) Cell division control protein 42 homolog precursor (G25K GTP-binding protein) [MASS=21310]                                                                              | 0.00 | 25.65 | *    | *    | * | 3 | 3<br>2<br>2 | M[147]QTIKC[330]VVVGDGAVGK<br>GLKNVFDEAILAALPEPETQPK<br>C[330]VVVGDGAVGK             | 1<br>1<br>1 |
| CDK5_HUMAN (Q00535) Cell division protein kinase 5 (EC 2.7.11.22) (Tau protein kinase II catalytic subunit) (TPKII catalytic subunit) (Serine/threonine-protein kinase PSSALRE) [MASS=33304] | *    | 3.08  | *    | *    | * | 1 | 2           | LHDVLHSDK                                                                            | 1           |
| CDK6_HUMAN (Q00534) Cell division protein kinase 6 (EC 2.7.11.22) (Serine/threonine-protein kinase PLSTIRE) [MASS=36938]                                                                     | *    | 5.52  | *    | *    | * | 1 | 2           | LTLVFEHVDQDLTTYLDK                                                                   | 1           |
| CDKL1_HUMAN (Q00532) Cyclin-dependent kinase-like 1 (EC 2.7.11.22) (Serine/threonine-protein kinase KKIALRE) (Protein kinase p42 KKIALRE) [MASS=41701]                                       | *    | 8.12  | *    | *    | * | 1 | 3           | HHC[330]FTETSKLQYLPQLTGSSILPALDNKK                                                   | 1           |
| CDON_HUMAN (Q4KMG0) Cell adhesion molecule-related/down-regulated by oncogenes precursor [MASS=139233]                                                                                       | *    | 2.56  | *    | *    | * | 3 | 2<br>1<br>2 | SAGFIGC[339]RVPESNPK<br>VPESNPK<br>ANGGSPITAFK                                       | 1<br>3<br>1 |
| CECR2_HUMAN (Q9BXF3) Cat eye syndrome critical region protein 2 [MASS=164214]                                                                                                                | 0.00 | 2.36  | 0.30 | 0.00 | 1 | 2 | 2<br>2      | NAM[147]ASLQGC[339]ETLNAALTSPTR<br>SSC[330]SESADNC[330]KAM[147]K                     | 1<br>1      |
| CELR1_HUMAN (Q9NYQ6) Cadherin EGF LAG seven-pass G-type receptor 1 precursor (Flamingo homolog 2) (hFmi2) [MASS=329484]                                                                      | *    | 0.33  | *    | *    | * | 1 | 2           | KHLKGVLGGR                                                                           | 1           |

|                                                                                                                                                                                                             |      |       |      |      |   |   |                            |                                                                                                                                                              |                            |
|-------------------------------------------------------------------------------------------------------------------------------------------------------------------------------------------------------------|------|-------|------|------|---|---|----------------------------|--------------------------------------------------------------------------------------------------------------------------------------------------------------|----------------------------|
| CEL2R2_HUMAN (Q9HCU4) Cadherin EGF LAG seven-pass G-type receptor 2 precursor (Epidermal growth factor-like 2) (Multiple epidermal growth factor-like domains 3) (Flamingo 1) [MASS=317450]                 | 0.00 | 3.42  | 1.53 | 0.00 | 1 | 5 | 2<br>3<br>3<br>1<br>3<br>3 | HIDMADFIANNGTVPGC[330]PAK<br>PAGTTVVLISATDEDTGENARITYFMEDSIPQFR<br>LYLNRSLLTAISAQR<br>GILKKK<br>HIDMADFIANNGTVPGC[339]PAK<br>PIINTPVVVISVHDDEELLPRALDK       | 1<br>1<br>1<br>1<br>1<br>1 |
| CEL2R3_HUMAN (Q9NYQ7) Cadherin EGF LAG seven-pass G-type receptor 3 precursor (Flamingo homolog 1) (hFmi1) (Multiple epidermal growth factor-like domains 2) (Epidermal growth factor-like 1) [MASS=358255] | *    | 3.96  | *    | *    | * | 6 | 2<br>2<br>3<br>3<br>3<br>3 | NSRGPPEQPNEELGIEHGVQPLGSR<br>LQYPLVPQTRGAPELSWC[339]R<br>QEYVIVVQATSAPLVSR<br>IYAGGGTGSLSQPASRYSSREQLDLLLLR<br>MQVEPRNVDRGAMR<br>HGSAADHTDHSLQAAGPTDLDVAMFHR | 1<br>1<br>1<br>1<br>1<br>1 |
| CENB1_HUMAN (Q15027) Centaurin-beta 1 (Cnt-b1) [MASS=81535]                                                                                                                                                 | *    | 7.03  | *    | *    | * | 4 | 3<br>2<br>1<br>3           | KELGAQLHQLVLNSAR<br>DPVTVVVDDLRL<br>ASNAFK<br>EAEAAQQQAGDETYLDIFR                                                                                            | 1<br>1<br>1<br>1           |
| CENB2_HUMAN (Q15057) Centaurin-beta 2 (Cnt-b2) [MASS=88028]                                                                                                                                                 | 0.00 | 3.21  | 0.46 | 0.00 | 1 | 2 | 1<br>3                     | KFVSK<br>LM[147]C[330]ELGNDVINRVYEANVEK                                                                                                                      | 1<br>1                     |
| CENB5_HUMAN (Q96P50) Centaurin-beta 5 (Cnt-b5) [MASS=84664]                                                                                                                                                 | *    | 6.59  | *    | *    | * | 2 | 2<br>2                     | M[147]AEEM[147]REAEAAPGPPGALAGSPTLQFR<br>VRLEPVLPVC[339]VAALSSVGTLDLDRK                                                                                      | 1<br>1                     |
| CEND1_HUMAN (Q8WZ64) Centaurin-delta 1 (Cnt-d1) (Arf-GAP, Rho-GAP, ankyrin repeat and pleckstrin homology domain-containing protein 2) (PARX protein) [MASS=193422]                                         | *    | 1.47  | *    | *    | * | 2 | 2<br>2                     | VIEELNVVLQRSRTLPK<br>ALC[339]AAVVK                                                                                                                           | 1<br>1                     |
| CEND2_HUMAN (Q96P48) Centaurin-delta 2 (Cnt-d2) (Arf-GAP, Rho-GAP, ankyrin repeat and pleckstrin homology domain-containing protein 1) [MASS=136263]                                                        | *    | 6.69  | *    | *    | * | 4 | 3<br>3<br>3<br>3           | LSSAYLLGVPVGPSEQPDRAGSLELRGFK<br>PWSGAPETSHRPEK<br>KAETEQHIVKVPASM[147]TAEELTLEILDR<br>AQEGWFSLSGSELR                                                        | 1<br>1<br>1<br>1           |
| CENPF_HUMAN (P49454) CENP-F kinetochore protein (Centromere protein F) (Mitosis) (AH antigen) [MASS=367592]                                                                                                 | *    | 2.52  | *    | *    | * | 4 | 3<br>2<br>2<br>3           | QFQLDSLEAAPQKQTQKVENEK<br>ALQAKKASQTLQPATMNRH<br>NNYIVLQSSVNGLIQEVEDGK<br>NLENELELTKM[147]DKM[147]SFVEK                                                      | 1<br>1<br>1<br>1           |
| CEP70_HUMAN (Q8NHQ1) Centrosomal protein of 70 kDa (Cep70 protein) (p10-binding protein) [MASS=69751]                                                                                                       | 0.00 | 11.73 | 0.39 | 0.00 | 1 | 3 | 2<br>3<br>2                | NELQLEQSRAANQEQRANDLEQIMESVK<br>NLQELLELDSSSSLC[339]VLVSTVGKLC[330]R<br>TEQEETIASLQM[147]EVC[330]R                                                           | 1<br>1<br>1                |
| CF170_HUMAN (Q96NH3) Protein C6orf170 [MASS=143651]                                                                                                                                                         | *    | 2.25  | *    | *    | * | 1 | 3                          | SSLLC[330]LQGNVYAGHDWVSSLFMIMLGDK                                                                                                                            | 1                          |
| CF182_HUMAN (Q8IYX8) Protein C6orf182 [MASS=53648]                                                                                                                                                          | *    | 8.04  | *    | *    | * | 2 | 3<br>3                     | QMKETESHVVC[330]DDIEC[339]ELEC[339]LLKK<br>LEKLDVLEKEC[330]FR                                                                                                | 1<br>1                     |

|                                                                                                                                                                                                                                                  |                             |       |      |      |    |   |   |                                             |   |
|--------------------------------------------------------------------------------------------------------------------------------------------------------------------------------------------------------------------------------------------------|-----------------------------|-------|------|------|----|---|---|---------------------------------------------|---|
| CFAB_HUMAN (P00751) Complement factor B precursor (EC 3.4.21.47) (C3/C5 convertase) (Properdin factor B) (Glycine-rich beta glycoprotein) (GBG) (PBF2) [Contains: Complement factor B Ba fragment; Complement factor B Bb fragment] [MASS=85532] | 0.00                        | 8.12  | 2.43 | 0.00 | 1  | 3 | 3 | WSGQTAIC[330]DNGAGYC[330]SNPGIPIGTRKVGVSQYR | 1 |
|                                                                                                                                                                                                                                                  |                             |       |      |      |    |   | 2 | LEDSVTYHC[339]SR                            | 1 |
|                                                                                                                                                                                                                                                  |                             |       |      |      |    |   | 3 | QLNEINYEDHKLKSGTNTK                         | 1 |
| CH60_HUMAN (P10809) 60 kDa heat shock protein, mitochondrial precursor (Hsp60) (60 kDa chaperonin) (CPN60) (Heat shock protein 60) (HSP-60) (Mitochondrial matrix protein P1) (P60 lymphocyte protein) (HuCHA60) [MASS=61054]                    | 1.00                        | 18.15 | 1.28 | 0.07 | 11 | 6 | 2 | C[339]EFQDAYVLLSEK                          | 1 |
|                                                                                                                                                                                                                                                  |                             |       |      |      |    |   | 2 | DGKTLNDELEIIEGM[147]K                       | 1 |
|                                                                                                                                                                                                                                                  |                             |       |      |      |    |   | 2 | AAVEEGIVLGGGC[330]ALLR                      | 2 |
|                                                                                                                                                                                                                                                  |                             |       |      |      |    |   | 2 | C[339]EFQDAYVLLSEKK                         | 2 |
|                                                                                                                                                                                                                                                  |                             |       |      |      |    |   | 2 | C[330]IPALDSLTPANEDQK                       | 1 |
|                                                                                                                                                                                                                                                  |                             |       |      |      |    |   | 2 | VVRTALLDAAGVASLLTTAEVWVTEIPK                | 1 |
| 2                                                                                                                                                                                                                                                | AAVEEGIVLGGGC[339]ALLR      | 2     |      |      |    |   |   |                                             |   |
| CHCH3_HUMAN (Q9NX63) Coiled-coil-helix-coiled-coil-helix domain-containing protein 3 [MASS=26152]                                                                                                                                                | 1.00                        | 29.52 | 1.17 | 0.04 | 4  | 5 | 2 | C[339]IPALDSLTPANEDQK                       | 2 |
|                                                                                                                                                                                                                                                  |                             |       |      |      |    |   | 2 | C[330]EFQDAYVLLSEK                          | 1 |
|                                                                                                                                                                                                                                                  |                             |       |      |      |    |   | 2 | ERIC[330]SEEER                              | 1 |
|                                                                                                                                                                                                                                                  |                             |       |      |      |    |   | 2 | YESHPVC[339]ADLQAK                          | 1 |
|                                                                                                                                                                                                                                                  |                             |       |      |      |    |   | 2 | C[339]SALATQYM[147]HC[339]VNHAKQSM[147]LEK  | 1 |
|                                                                                                                                                                                                                                                  |                             |       |      |      |    |   | 2 | EQLARLEER                                   | 1 |
| 2                                                                                                                                                                                                                                                | RYESHPVC[339]ADLQAK         | 1     |      |      |    |   |   |                                             |   |
| 2                                                                                                                                                                                                                                                | RYESHPVC[330]ADLQAK         | 1     |      |      |    |   |   |                                             |   |
| CHCH6_HUMAN (Q9BRQ6) Coiled-coil-helix-coiled-coil-helix domain-containing protein 6 [MASS=26458]                                                                                                                                                | 0.00                        | 3.40  | 1.49 | 0.00 | 1  | 1 | 2 | C[330]VSAAHKG                               | 1 |
| CHD1_HUMAN (O14646) Chromodomain-helicase-DNA-binding protein 1 (EC 3.6.1.-) (ATP-dependent helicase CHD1) (CHD-1) [MASS=196517]                                                                                                                 | *                           | 3.57  | *    | *    | *  | 4 | 3 | EKSSC[339]DETESDYEPKNK                      | 1 |
|                                                                                                                                                                                                                                                  |                             |       |      |      |    |   | 2 | ALSKGSKGSTSGFLNIMM[147]ELK                  | 1 |
|                                                                                                                                                                                                                                                  |                             |       |      |      |    |   | 1 | VLIFSQMVR                                   | 1 |
|                                                                                                                                                                                                                                                  |                             |       |      |      |    |   | 3 | SSGKLILLDKLLIR                              | 1 |
| CHD3_HUMAN (Q12873) Chromodomain helicase-DNA-binding protein 3 (EC 3.6.1.-) (ATP-dependent helicase CHD3) (CHD-3) (Mi-2 autoantigen 240 kDa protein) (Mi2-alpha) (Zinc-finger helicase) (hZFH) [MASS=226590]                                    | 0.00                        | 7.20  | *    | *    | *  | 8 | 3 | ASSPTKTSPTTPEASATNSPC[339]TSKPATPAPSEK      | 1 |
|                                                                                                                                                                                                                                                  |                             |       |      |      |    |   | 1 | GKKM[147]APLK                               | 1 |
|                                                                                                                                                                                                                                                  |                             |       |      |      |    |   | 3 | EQGHRVLIFSQMTKM[147]LDLLEDFLDYEGYK          | 1 |
|                                                                                                                                                                                                                                                  |                             |       |      |      |    |   | 3 | DDIRLLPSALGVK                               | 1 |
|                                                                                                                                                                                                                                                  |                             |       |      |      |    |   | 1 | KMAPLKIK                                    | 1 |
|                                                                                                                                                                                                                                                  |                             |       |      |      |    |   | 3 | EDQIKLHDLLGPHM[147]LR                       | 1 |
| 2                                                                                                                                                                                                                                                | KIPLEDEVPGVPGEM[147]EPEPGYR | 1     |      |      |    |   |   |                                             |   |
| 2                                                                                                                                                                                                                                                | HRELIM[147]GEDPAQPR         | 1     |      |      |    |   |   |                                             |   |

|                                                                                                                                                                                                                                                                               |      |       |      |      |   |   |   |                                        |   |
|-------------------------------------------------------------------------------------------------------------------------------------------------------------------------------------------------------------------------------------------------------------------------------|------|-------|------|------|---|---|---|----------------------------------------|---|
| CHD8_HUMAN (Q9HCK8) Chromodomain-helicase-DNA-binding protein 8 (EC 3.6.1.-) (ATP-dependent helicase CHD8) (CHD-8) (Helicase with SNF2 domain 1) [MASS=262315]                                                                                                                | *    | 2.91  | *    | *    | * | 3 | 2 | EAC[330]HIIPHDFHLQAM[147]VRSAGK        | 1 |
|                                                                                                                                                                                                                                                                               |      |       |      |      |   |   | 2 | VKSQSTFDIHKADWIR                       | 1 |
|                                                                                                                                                                                                                                                                               |      |       |      |      |   |   | 3 | VLSASEVAALSSPASSAPHSGGKTGM[147]EENR    | 1 |
| CHIC1_HUMAN (Q5VXU3) Cysteine-rich hydrophobic domain 1 protein (Brain X-linked protein) [MASS=25616]                                                                                                                                                                         | *    | 6.25  | *    | *    | * | 1 | 3 | VNAC[330]LKKALPVNVK                    | 1 |
| CHMP3_HUMAN (Q9Y3E7) Charged multivesicular body protein 3 (Chromatin-modifying protein 3) (Vacuolar protein sorting 24) (hVps24) (Neuroendocrine differentiation factor) [MASS=24942]                                                                                        | *    | 4.98  | *    | *    | * | 1 | 2 | GQKDVC[339]IVLAK                       | 1 |
| CHSS3_HUMAN (Q70JA7) Chondroitin sulfate synthase 3 (EC 2.4.1.175) (Glucuronosyl-N-acetylgalactosaminyl-proteoglycan 4-beta-N-acetylgalactosaminyltransferase II) (Chondroitin synthase 2) (N-acetylgalactosaminyl-proteoglycan 3-beta-glucuronosyltransferase) [MASS=100356] | *    | 4.99  | *    | *    | * | 2 | 3 | LGLEPGENFC[330]M[147]GGPGM[147]IFSR    | 1 |
|                                                                                                                                                                                                                                                                               |      |       |      |      |   |   | 3 | LGLEPGENFC[339]M[147]GGPGM[147]IFSREVL | 1 |
| CHSTE_HUMAN (Q8NCH0) Carbohydrate sulfotransferase D4ST1 (EC 2.8.2.-) (Dermatan 4-sulfotransferase 1) (D4ST-1) (hD4ST) [MASS=42997]                                                                                                                                           | *    | 5.05  | *    | *    | * | 1 | 2 | AGAGPSPAGDDVTFPEFLR                    | 1 |
| CI004_HUMAN (Q9P0K9) Protein C9orf4 (Brain protein CG-6) [MASS=37270]                                                                                                                                                                                                         | 0.00 | 9.88  | 0.76 | 0.00 | 1 | 3 | 2 | IKVDDC[339]GK                          | 1 |
|                                                                                                                                                                                                                                                                               |      |       |      |      |   |   | 2 | AGGLGGGSVPPAR                          | 1 |
|                                                                                                                                                                                                                                                                               |      |       |      |      |   |   | 2 | AGGLGGGSVPPARAR                        | 1 |
| CIC_HUMAN (Q96RK0) Protein capicua homolog [MASS=163789]                                                                                                                                                                                                                      | *    | 5.22  | *    | *    | * | 3 | 3 | TLDQRRALVM[147]QLFQDHGFFPSAQATAAFQAR   | 1 |
|                                                                                                                                                                                                                                                                               |      |       |      |      |   |   | 2 | C[330]KERVTDSESGDSSGEDPEGNK            | 1 |
|                                                                                                                                                                                                                                                                               |      |       |      |      |   |   | 3 | LDSETESDHDDAFLSIM[147]SPEIQLPLPPGKRR   | 1 |
| CISY_HUMAN (O75390) Citrate synthase, mitochondrial precursor (EC 2.3.3.1) [MASS=51712]                                                                                                                                                                                       | 0.79 | 5.58  | 1.32 | 0.00 | 1 | 2 | 1 | LPC[339]VAAK                           | 1 |
|                                                                                                                                                                                                                                                                               |      |       |      |      |   |   | 3 | TVVGQITVDM[147]YGGMRGMK                | 1 |
|                                                                                                                                                                                                                                                                               |      |       |      |      |   |   | 1 | LPC[330]VAAK                           | 1 |
| CJ067_HUMAN (Q8IYJ2) Protein C10orf67 [MASS=21463]                                                                                                                                                                                                                            | *    | 11.41 | *    | *    | * | 1 | 2 | WVHC[330]FSSSLRGTGTRWEAMK              | 1 |

|                                                                                                                                                                    |      |       |      |      |    |   |  |   |                                               |   |
|--------------------------------------------------------------------------------------------------------------------------------------------------------------------|------|-------|------|------|----|---|--|---|-----------------------------------------------|---|
|                                                                                                                                                                    |      |       |      |      |    |   |  | 2 | IVHAFDM[147]EDLGDKAVYC[339]R                  | 1 |
|                                                                                                                                                                    |      |       |      |      |    |   |  | 2 | IVHAFDM[147]EDLGDKAVYC[330]R                  | 1 |
|                                                                                                                                                                    |      |       |      |      |    |   |  | 3 | KFPFC[339]DGAHTK                              | 1 |
|                                                                                                                                                                    |      |       |      |      |    |   |  | 2 | AVYC[330]R                                    | 1 |
|                                                                                                                                                                    |      |       |      |      |    |   |  | 2 | KFPFC[330]DGAHTK                              | 3 |
| CJ070_HUMAN (Q9NZ45) Protein C10orf70<br>[MASS=12199]                                                                                                              | 1.00 | 40.74 | 1.12 | 0.06 | 12 | 4 |  |   |                                               |   |
|                                                                                                                                                                    |      |       |      |      |    |   |  | 2 | FPPFC[339]DGAHTK                              | 1 |
|                                                                                                                                                                    |      |       |      |      |    |   |  | 2 | KFPFC[339]DGAHTK                              | 2 |
|                                                                                                                                                                    |      |       |      |      |    |   |  | 1 | FPPFC[339]DGAHTK                              | 1 |
|                                                                                                                                                                    |      |       |      |      |    |   |  | 2 | IVHAFDMEDLGDKAVYC[330]R                       | 1 |
|                                                                                                                                                                    |      |       |      |      |    |   |  | 2 | FPPFC[330]DGAHTK                              | 1 |
| CJ084_HUMAN (Q9H8W3) Protein C10orf84<br>[MASS=27021]                                                                                                              | *    | 7.30  | *    | *    | *  | 1 |  | 2 | ELGVKIAKAVAC[339]HNFVK                        | 1 |
| CK5P2_HUMAN (Q96SN8) CDK5 regulatory<br>subunit-associated protein 2 (CDK5 activator-<br>binding protein C48) (Centrosome-associated<br>protein 215) [MASS=215036] | 0.00 | 2.38  | 0.36 | 0.00 | 1  | 3 |  | 3 | YPM[147]ESDNSFDLFDSSQAVTPK                    | 1 |
|                                                                                                                                                                    |      |       |      |      |    |   |  | 2 | GGC[330]KNGYL RHTESK                          | 1 |
|                                                                                                                                                                    |      |       |      |      |    |   |  | 2 | LHKLF EQEK                                    | 1 |
| CLC10_HUMAN (Q8IUN9) C-type lectin<br>domain family 10 member A (C-type lectin<br>superfamily member 14) (Macrophage lectin 2)<br>(CD301 antigen) [MASS=35446]     | *    | 2.53  | *    | *    | *  | 1 |  | 2 | EEQNFVQK                                      | 1 |
| CLD6_HUMAN (P56747) Claudin-6 (Skullin 2)<br>[MASS=23291]                                                                                                          | 0.00 | 14.09 | 0.90 | 0.00 | 1  | 1 |  | 3 | M[147]ASAGM[147]QILGVVLTLLGWVNLVSC[330]ALPMWK | 1 |
|                                                                                                                                                                    |      |       |      |      |    |   |  | 2 | YESLELC[330]RPVLQQGR                          | 1 |
|                                                                                                                                                                    |      |       |      |      |    |   |  | 2 | RDPHLAC[330]VAYER                             | 1 |
|                                                                                                                                                                    |      |       |      |      |    |   |  | 2 | IHEGC[330]EEPATHNALAK                         | 1 |
|                                                                                                                                                                    |      |       |      |      |    |   |  | 3 | HNIM[147]DFAMPYFIQVMKEYLTK                    | 1 |
|                                                                                                                                                                    |      |       |      |      |    |   |  | 2 | RDPHLAC[339]VAYER                             | 1 |
| CLH1_HUMAN (Q00610) Clathrin heavy chain<br>1 (CLH-17) [MASS=191482]                                                                                               | 1.00 | 5.79  | 0.51 | 0.18 | 9  | 6 |  | 2 | IHEGC[339]EEPATHNALAK                         | 1 |
|                                                                                                                                                                    |      |       |      |      |    |   |  | 3 | IHEGC[330]EEPATHNALAK                         | 1 |
|                                                                                                                                                                    |      |       |      |      |    |   |  | 3 | IHEGC[339]EEPATHNALAK                         | 1 |
|                                                                                                                                                                    |      |       |      |      |    |   |  | 3 | VNPSRLPVVIGLLDVDC[330]SESVIK                  | 1 |
|                                                                                                                                                                    |      |       |      |      |    |   |  | 3 | RDPHLAC[330]VAYER                             | 1 |
|                                                                                                                                                                    |      |       |      |      |    |   |  | 2 | AHIAQLC[330]EK                                | 1 |
| CLH2_HUMAN (P53675) Clathrin heavy chain<br>2 (CLH-22) [MASS=187029]                                                                                               | 0.00 | 3.05  | *    | *    | *  | 2 |  | 3 | C[339]NEPAVWSQLAQAQLQK                        | 1 |
|                                                                                                                                                                    |      |       |      |      |    |   |  | 3 | GYFEELILLLEAALGLERAHM[147]GMFTELA ILYSK       | 1 |
| CLIC6_HUMAN (Q96NY7) Chloride<br>intracellular channel 6 [MASS=73011]                                                                                              | 0.00 | 3.12  | 0.73 | 0.00 | 1  | 1 |  | 2 | DEFTNTC[330]PADQEIEHAYS DVAK                  | 1 |

|                                                                                                                                                                                                |      |       |      |      |   |   |   |                                         |   |
|------------------------------------------------------------------------------------------------------------------------------------------------------------------------------------------------|------|-------|------|------|---|---|---|-----------------------------------------|---|
| CM007_HUMAN (Q5W0B1) Protein C13orf7<br>[MASS=811116]                                                                                                                                          | *    | 6.20  | *    | *    | * | 2 | 3 | TSSEASMDAAYLDKISELDSMMSESDNSK           | 1 |
|                                                                                                                                                                                                |      |       |      |      |   |   | 2 | IQSSLSSASPSKATKS                        | 1 |
| CMC1_HUMAN (O75746) Calcium-binding<br>mitochondrial carrier protein Aralar1<br>(Mitochondrial aspartate glutamate carrier 1)<br>(Solute carrier family 25 member 12)<br>[MASS=74755]          | 1.00 | 10.32 | 1.01 | 0.02 | 5 | 4 | 2 | AGQTTYSGVIDC[330]FRK                    | 1 |
|                                                                                                                                                                                                |      |       |      |      |   |   | 3 | NIFLQYASTEVDGERYMTPEDFVQR               | 1 |
|                                                                                                                                                                                                |      |       |      |      |   |   | 2 | AGQTTYSGVIDC[339]FRK                    | 1 |
|                                                                                                                                                                                                |      |       |      |      |   |   | 2 | AGQTTYSGVIDC[330]FR                     | 1 |
|                                                                                                                                                                                                |      |       |      |      |   |   | 2 | DIPFSAIYFPVYAH[C330]K                   | 2 |
| CMC2_HUMAN (Q9UJS0) Calcium-binding<br>mitochondrial carrier protein Aralar2<br>(Mitochondrial aspartate glutamate carrier 2)<br>(Solute carrier family 25 member 13) (Citrin)<br>[MASS=74175] | 0.00 | 2.52  | *    | *    | * | 1 | 2 | TGRVTAIDFRDIMVTIR                       | 1 |
|                                                                                                                                                                                                |      |       |      |      |   |   | 3 | IQDTLDLVMKTLSSHTSC[339]PK               | 1 |
|                                                                                                                                                                                                |      |       |      |      |   |   | 3 | IC[330]SFTTFM[147]RNK                   | 5 |
| CN050_HUMAN (Q96LQ0) Protein C14orf50<br>[MASS=49440]                                                                                                                                          | 0.00 | 10.43 | 1.63 | 0.00 | 1 | 3 |   |                                         |   |
|                                                                                                                                                                                                |      |       |      |      |   |   | 3 | YC[339]ILVLGLAVPDK                      | 1 |
| CN145_HUMAN (Q6ZU80) Protein C14orf145<br>[MASS=73571]                                                                                                                                         | *    | 3.21  | *    | *    | * | 1 | 2 | EKDELKTQLYAALQQIENLR                    | 1 |
| CN159_HUMAN (Q7Z3D6) Protein C14orf159,<br>mitochondrial precursor [MASS=66436]                                                                                                                | 0.00 | 6.17  | 1.07 | 0.00 | 1 | 2 | 3 | PNIRNTSSM[147]AGELR                     | 1 |
|                                                                                                                                                                                                |      |       |      |      |   |   | 3 | AC[339]C[339]SLGGEGQGPVHM[147]GDPELLGIK | 1 |

|                                                                                                                                |      |       |      |      |    |   |  |   |                                      |   |
|--------------------------------------------------------------------------------------------------------------------------------|------|-------|------|------|----|---|--|---|--------------------------------------|---|
|                                                                                                                                |      |       |      |      |    |   |  | 2 | RPPGVLHC[339]TTK                     | 4 |
|                                                                                                                                |      |       |      |      |    |   |  | 3 | AHITLGC[339]AADVEAVQTGLDLLEILR       | 3 |
|                                                                                                                                |      |       |      |      |    |   |  | 3 | DKPELQFPFLQDEDTVATLLEC[330]K         | 2 |
|                                                                                                                                |      |       |      |      |    |   |  | 2 | AHITLGC[330]AADVEAVQTGLDLLEILR       | 2 |
|                                                                                                                                |      |       |      |      |    |   |  | 3 | RPPGVLHC[330]TTK                     | 1 |
|                                                                                                                                |      |       |      |      |    |   |  | 3 | DKPELQFPFLQDEDTVATLLEC[339]K         | 3 |
| CN37_HUMAN (P09543) 2',3'-cyclic-nucleotide 3'-phosphodiesterase (EC 3.1.4.37) (CNP) (CNPase) [MASS=47578]                     | 1.00 | 19.71 | 0.95 | 0.09 | 33 | 6 |  | 2 | RLDEDLAAYC[330]R                     | 1 |
|                                                                                                                                |      |       |      |      |    |   |  | 1 | FC[330]DYGK                          | 4 |
|                                                                                                                                |      |       |      |      |    |   |  | 2 | DKPELQFPFLQDEDTVATLLEC[339]K         | 1 |
|                                                                                                                                |      |       |      |      |    |   |  | 2 | DKPELQFPFLQDEDTVATLLEC[330]K         | 2 |
|                                                                                                                                |      |       |      |      |    |   |  | 2 | RPPGVLHC[330]TTK                     | 4 |
|                                                                                                                                |      |       |      |      |    |   |  | 2 | LDC[330]AQLK                         | 1 |
|                                                                                                                                |      |       |      |      |    |   |  | 2 | AHITLGC[339]AADVEAVQTGLDLLEILR       | 2 |
| CN37_HUMAN (P09543) 2',3'-cyclic-nucleotide 3'-phosphodiesterase (EC 3.1.4.37) (CNP) (CNPase) [MASS=47578]                     | 1.00 | 19.71 | 0.95 | 0.09 | 33 | 6 |  | 3 | RPPGVLHC[339]TTK                     | 1 |
|                                                                                                                                |      |       |      |      |    |   |  | 3 | AHITLGC[330]AADVEAVQTGLDLLEILR       | 3 |
| CNTN1_HUMAN (Q12860) Contactin-1 precursor (Neural cell surface protein F3) (Glycoprotein gp135) [MASS=113320]                 | 1.00 | 2.16  | 0.53 | 0.17 | 3  | 2 |  | 2 | VIIEC[330]KPK                        | 1 |
|                                                                                                                                |      |       |      |      |    |   |  | 2 | NDGGIYTC[330]FAENNR                  | 2 |
| CNTP1_HUMAN (P78357) Contactin-associated protein 1 precursor (Caspr) (Caspr1) (Neurexin 4) (Neurexin IV) (p190) [MASS=156266] | 0.77 | 4.62  | 0.85 | 0.02 | 2  | 4 |  | 2 | PGRPVPGYR                            | 1 |
|                                                                                                                                |      |       |      |      |    |   |  | 2 | C[330]SPNM[147]C[330]EHDGR           | 1 |
|                                                                                                                                |      |       |      |      |    |   |  | 2 | C[339]SPNM[147]C[339]EHDGR           | 1 |
|                                                                                                                                |      |       |      |      |    |   |  | 3 | PMTAELAEALRVQGELSESNC[339]GAM[147]PR | 1 |
|                                                                                                                                |      |       |      |      |    |   |  | 2 | LNLDTEM[147]FIGGLVGAARK              | 1 |

|                                                                                                                                                                     |                         |       |      |      |   |   |   |                                             |   |
|---------------------------------------------------------------------------------------------------------------------------------------------------------------------|-------------------------|-------|------|------|---|---|---|---------------------------------------------|---|
| CO7A1_HUMAN (Q02388) Collagen alpha-1(VII) chain precursor (Long-chain collagen) (LC collagen) [MASS=295217]                                                        | *                       | 3.36  | *    | *    | * | 6 | 3 | GPEASVTQTPVC[330]PRGLADVFLPHATQDNAHR        | 1 |
|                                                                                                                                                                     |                         |       |      |      |   |   | 1 | EGRDGPK                                     | 1 |
|                                                                                                                                                                     |                         |       |      |      |   |   | 2 | AGGVGEAGRPGERGER                            | 1 |
|                                                                                                                                                                     |                         |       |      |      |   |   | 2 | GEPGSNGDQGP                                 | 1 |
|                                                                                                                                                                     |                         |       |      |      |   |   | 2 | FGTREA[339]ER                               | 1 |
|                                                                                                                                                                     |                         |       |      |      |   |   | 2 | IRDMPYMDPSGNNLGTAVVTAHR                     | 1 |
| COE4_HUMAN (Q9BQW3) Transcription factor COE4 (Early B-cell factor 4) (EBF-4) (Olf-1/EBF-like 4) (OE-4) (O/E-4) [MASS=68360]                                        | *                       | 6.37  | *    | *    | * | 2 | 3 | FQVVVSTTVSVDGHVLAVSDNM[147]FVHNNSKHGR       | 1 |
|                                                                                                                                                                     |                         |       |      |      |   |   | 2 | LRPRAAPPK                                   | 1 |
| COF1_HUMAN (P23528) Cofilin-1 (Cofilin, non-muscle isoform) (18 kDa phosphoprotein) (p18) [MASS=18371]                                                              | 1.00                    | 13.33 | 0.51 | 0.27 | 5 | 2 | 2 | M[147]LPDKDC[330]R                          | 2 |
|                                                                                                                                                                     |                         |       |      |      |   |   | 2 | M[147]LPDKDC[339]R                          | 1 |
|                                                                                                                                                                     |                         |       |      |      |   |   | 2 | HELQANC[330]YEEVKDR                         | 1 |
|                                                                                                                                                                     |                         |       |      |      |   |   | 2 | MLPDKDC[339]R                               | 1 |
| COG5_HUMAN (Q9UP83) Conserved oligomeric Golgi complex component 5 (13S Golgi transport complex 90 kDa subunit) (GTC-90) (Golgi transport complex 1) [MASS=92718]   | *                       | 2.38  | *    | *    | * | 1 | 3 | MRLAADFAQME LAVGPFC[339]RR                  | 1 |
| COPA_HUMAN (P53621) Coatomer subunit alpha (Alpha-coat protein) (Alpha-COP) (HEPCOP) (HEP-COP) [Contains: Xenin (Xenopsin-related peptide); Proxenin] [MASS=138331] | *                       | 8.74  | *    | *    | * | 4 | 3 | ALDDKNC[330]WEKLG E VALLQGNHQIVEMC[339]YQR  | 1 |
|                                                                                                                                                                     |                         |       |      |      |   |   | 3 | ASNLENSTYDLYTIPKDADSQNPDAPEGKR              | 1 |
|                                                                                                                                                                     |                         |       |      |      |   |   | 2 | LGEVALLQGNHQIVEM[147]C[339]YQRTK            | 1 |
|                                                                                                                                                                     |                         |       |      |      |   |   | 3 | NC[330]WEKLG E VALLQGNHQIVEMC[330]YQR       | 1 |
| COPG_HUMAN (Q9Y678) Coatomer subunit gamma (Gamma-coat protein) (Gamma-COP) [MASS=97718]                                                                            | *                       | 10.41 | *    | *    | * | 5 | 2 | ATFYLNVLEQKQK                               | 1 |
|                                                                                                                                                                     |                         |       |      |      |   |   | 2 | YIRFIYNR                                    | 1 |
|                                                                                                                                                                     |                         |       |      |      |   |   | 2 | VM[147]KLNFEAAWDEVGDEF E KEETFTLSTIK        | 1 |
|                                                                                                                                                                     |                         |       |      |      |   |   | 2 | EM[147]SC[330]IAEDVIIVTSSLTKDM[147]TGKEDNYR | 1 |
| 3                                                                                                                                                                   | RC[339]VM[147]DDDNEVRDR | 1     |      |      |   |   |   |                                             |   |
| COQ5_HUMAN (Q5HYK3) Ubiquinone biosynthesis methyltransferase COQ5, mitochondrial precursor (EC 2.1.1.-) [MASS=37140]                                               | 0.00                    | 4.89  | 1.20 | 0.00 | 1 | 1 | 2 | FLC[339]LEFSQVNNPLISR                       | 1 |
| CORO7_HUMAN (P57737) Coronin-7 (70 kDa WD repeat tumor rejection antigen homolog) [MASS=100574]                                                                     | 0.26                    | 4.97  | 0.54 | 0.72 | 2 | 2 | 2 | TEC[339]DVREVELMRC[339]LR                   | 1 |
|                                                                                                                                                                     |                         |       |      |      |   |   | 3 | VAHLGC[339]HSDLVTDLDFSPFDDFLLATGSADR        | 1 |
| COX5B_HUMAN (P10606) Cytochrome c oxidase polypeptide Vb, mitochondrial precursor (EC 1.9.3.1) [MASS=13696]                                                         | 1.00                    | 4.65  | 1.25 | 0.02 | 2 | 1 | 2 | C[339]GAHYK                                 | 1 |
|                                                                                                                                                                     |                         |       |      |      |   |   | 1 | C[339]GAHYK                                 | 1 |



|                                                                                                                                                                                            |      |       |      |      |   |   |             |                                                                                               |             |
|--------------------------------------------------------------------------------------------------------------------------------------------------------------------------------------------|------|-------|------|------|---|---|-------------|-----------------------------------------------------------------------------------------------|-------------|
| COX7C_HUMAN (P15954) Cytochrome c oxidase polypeptide VIIc, mitochondrial precursor (EC 1.9.3.1) [MASS=7245]                                                                               | 0.99 | 26.98 | 0.98 | 0.00 | 1 | 1 | 2           | M[147]C[339]LYFGSAFATPFLVVR                                                                   | 1           |
| CPLX1_HUMAN (O14810) Complexin-1 (Complexin I) (CPX I) (Synaphin-2) [MASS=15030]                                                                                                           | *    | 14.93 | *    | *    | * | 2 | 2<br>1      | MEFVMKQALGGATK<br>QGIRDK                                                                      | 1<br>1      |
| CPLX2_HUMAN (Q6PUV4) Complexin-2 (Complexin II) (CPX II) (Synaphin-1) [MASS=15394]                                                                                                         | 0.99 | 11.19 | 0.43 | 0.11 | 2 | 1 | 2           | AALEQPC[330]EGSLTRPK                                                                          | 2           |
| CPNE3_HUMAN (O75131) Copine-3 (Copine III) [MASS=60130]                                                                                                                                    | 0.62 | 10.06 | 2.62 | 0.00 | 1 | 3 | 2<br>2<br>2 | SC[330]LPQIKLYGPTNFSPINHVAR<br>EALAQC[339]VLAIEPQQVVGYPNTYK<br>NSGVISVK                       | 1<br>1<br>1 |
| CPNE6_HUMAN (O95741) Copine-6 (Copine VI) (Neuronal-copine) (N-copine) [MASS=61991]                                                                                                        | *    | 1.62  | *    | *    | * | 1 | 2           | VSC[330]HGLLDR                                                                                | 1           |
| CRSP8_HUMAN (Q6P2C8) CRSP complex subunit 8 (Cofactor required for Sp1 transcriptional activation subunit 8) (Transcriptional coactivator CRSP34) (P37 TRAP/SMCC/PC2 subunit) [MASS=35432] | 0.00 | 5.47  | 0.82 | 0.00 | 1 | 1 | 2           | C[330]GKFLQDGLPPTWRDFR                                                                        | 1           |
| CRTC_HUMAN (P27797) Calreticulin precursor (CRP55) (Calregulin) (HACBP) (ERp60) (grp60) [MASS=48141]                                                                                       | 1.00 | 3.12  | 1.70 | 0.00 | 2 | 1 | 2<br>2      | HEQNIDC[339]GGGYVK<br>HEQNIDC[330]GGGYVK                                                      | 1<br>1      |
| CRYM_HUMAN (Q14894) Mu-crystallin homolog (NADP-regulated thyroid-hormone-binding protein) [MASS=33775]                                                                                    | 0.98 | 2.87  | 0.61 | 0.00 | 1 | 1 | 2           | GVKPAHC[330]EK                                                                                | 1           |
| CS016_HUMAN (Q8ND99) Uncharacterized protein C19orf16 [MASS=60172]                                                                                                                         | *    | 11.29 | *    | *    | * | 3 | 2<br>2<br>3 | TQETDVVEM[147]TTQAKSPESPFTVTKK<br>EKAGPM[147]GSHQGP GPPPC[339]QK<br>ASAASASPRKASAVPAPPQK      | 1<br>1<br>1 |
| CSDE1_HUMAN (O75534) Cold shock domain-containing protein E1 (UNR protein) (N-ras upstream gene protein) [MASS=88884]                                                                      | *    | 1.88  | *    | *    | * | 1 | 2           | GPDNSMGFGAERKIR                                                                               | 1           |
| CSK11_HUMAN (Q8WXD9) Caskin-1 (CASK-interacting protein 1) [MASS=149813]                                                                                                                   | 0.00 | 5.31  | 0.94 | 0.00 | 1 | 3 | 3<br>2<br>2 | GSGGHALHAGSEGVKLLATVLSQKSVSESGPGDSPA<br>K<br>TLSGPVTGLLATARR<br>AGDIITVLEQHPDGRWKGC[330]IHDNR | 1<br>1<br>1 |
| CSMD1_HUMAN (Q96PZ7) CUB and sushi domain-containing protein 1 precursor (CUB and sushi multiple domains protein 1) [MASS=388867]                                                          | *    | 0.56  | *    | *    | * | 1 | 2           | EAC[330]FDPGNIM[147]NGTRVGTDFK                                                                | 1           |

|                                                                                                                                                                                                        |                |      |      |      |   |   |   |                                             |   |
|--------------------------------------------------------------------------------------------------------------------------------------------------------------------------------------------------------|----------------|------|------|------|---|---|---|---------------------------------------------|---|
| CSPG2_HUMAN (P13611) Versican core protein precursor (Large fibroblast proteoglycan) (Chondroitin sulfate proteoglycan core protein 2) (PG-M) (Glial hyaluronate-binding protein) (GHAP) [MASS=372817] | 1.00           | 3.65 | 0.48 | 0.17 | 6 | 7 | 3 | SPQETYDVYC[330]YVDHLDGDVFLTVPSK             | 1 |
|                                                                                                                                                                                                        |                |      |      |      |   |   | 2 | ILVEGISTVIYPSLQTEMTHR                       | 1 |
|                                                                                                                                                                                                        |                |      |      |      |   |   | 3 | MFEHDFRWTDGSTLQYENWR                        | 1 |
|                                                                                                                                                                                                        |                |      |      |      |   |   | 2 | AQC[339]GGGLLGVR                            | 1 |
|                                                                                                                                                                                                        |                |      |      |      |   |   | 2 | FTFEEAAKEC[330]JENQDAR                      | 1 |
|                                                                                                                                                                                                        |                |      |      |      |   |   | 3 | FTFEEAAKEC[330]JENQDAR                      | 1 |
|                                                                                                                                                                                                        |                |      |      |      |   |   | 2 | FTFEEAAKEC[339]JENQDAR                      | 1 |
|                                                                                                                                                                                                        |                |      |      |      |   |   | 3 | VGHDYQWIGLNDKM[147]FEHDFR                   | 1 |
| 2                                                                                                                                                                                                      | FDAYC[330]FKPK | 1    |      |      |   |   |   |                                             |   |
| CSPG3_HUMAN (O14594) Neurocan core protein precursor (Chondroitin sulfate proteoglycan 3) [MASS=142972]                                                                                                | 1.00           | 3.10 | 0.54 | 0.49 | 5 | 3 | 3 | LGSGSVQAALAELVALPC[330]LFTLQPR              | 1 |
|                                                                                                                                                                                                        |                |      |      |      |   |   | 2 | C[330]GGPAPGVR                              | 1 |
|                                                                                                                                                                                                        |                |      |      |      |   |   | 2 | FQGHC[330]YR                                | 1 |
|                                                                                                                                                                                                        |                |      |      |      |   |   | 2 | LGSGSVQAALAELVALPC[330]LFTLQPR              | 1 |
| 2                                                                                                                                                                                                      | FQGHC[339]YR   | 1    |      |      |   |   |   |                                             |   |
| CSR2B_HUMAN (Q9H8E8) Cysteine-rich protein 2-binding protein (CSR2-binding protein) (CRP2BP) (CRP2-binding partner) [MASS=88801]                                                                       | 0.27           | 4.73 | 2.28 | 0.00 | 1 | 2 | 2 | TSTWWSTVAGC[339]LSVGSPM[147]YFR             | 1 |
|                                                                                                                                                                                                        |                |      |      |      |   |   | 2 | DYETKPPKLQLLSQIR                            | 1 |
| CT135_HUMAN (Q9H3Z7) Uncharacterized protein C20orf135 [MASS=52554]                                                                                                                                    | *              | 2.56 | *    | *    | * | 1 | 2 | GNELLRLLEHR                                 | 1 |
| CTBP1_HUMAN (Q13363) C-terminal-binding protein 1 (EC 1.1.1.-) (CtBP1) [MASS=47535]                                                                                                                    | 0.99           | 7.50 | 0.47 | 0.00 | 1 | 1 | 3 | SAGDLGIAVC[330]NVPAASVEETADSTLC[330]HILNLYR | 1 |
| CTL2_HUMAN (Q8IWA5) Choline transporter-like protein 2 (Solute carrier family 44 member 2) [MASS=80151]                                                                                                | 1.00           | 4.25 | 0.75 | 0.00 | 2 | 2 | 2 | DGDC[330]PAVLIPSKPLAR                       | 1 |
|                                                                                                                                                                                                        |                |      |      |      |   |   | 2 | C[330]QFAFYGGESGYHR                         | 1 |
| CTN1_HUMAN (P35221) Alpha-1 catenin (Cadherin-associated protein) (Alpha E-catenin) (NY-REN-13 antigen) [MASS=100071]                                                                                  | *              | 1.32 | *    | *    | * | 1 | 3 | LLILADMADVYK                                | 1 |
| CTNB1_HUMAN (P35222) Beta-catenin [MASS=85496]                                                                                                                                                         | *              | 2.82 | *    | *    | * | 1 | 3 | HQEAEMAQNAVRLHYGLPVVVK                      | 1 |
|                                                                                                                                                                                                        |                |      |      |      |   |   | 3 | C[330]FEEC[339]FRPVK                        | 1 |
|                                                                                                                                                                                                        |                |      |      |      |   |   | 3 | PFRVLISLLDKPEIGPQVVGNLFLFLEVIR              | 1 |
| CU005_HUMAN (Q9Y3R5) Protein C21orf5 [MASS=258222]                                                                                                                                                     | *              | 5.27 | *    | *    | * | 7 | 3 | EQKYMMLGTNHQLTVK                            | 1 |
|                                                                                                                                                                                                        |                |      |      |      |   |   | 2 | SIIDHLLTHEKTM[147]FK                        | 1 |
|                                                                                                                                                                                                        |                |      |      |      |   |   | 3 | QKILDFLNPLTAHLGVQLTAAVAVWSR                 | 1 |
|                                                                                                                                                                                                        |                |      |      |      |   |   | 2 | TPNLENK                                     | 1 |
|                                                                                                                                                                                                        |                |      |      |      |   |   | 2 | RPVDLLGATKGSSSVYFK                          | 1 |

|                                                                                                                                                                                                                 |      |       |      |      |   |   |   |                                          |   |
|-----------------------------------------------------------------------------------------------------------------------------------------------------------------------------------------------------------------|------|-------|------|------|---|---|---|------------------------------------------|---|
| CU055_HUMAN (Q9NX36) J domain-containing protein C21orf55 [MASS=45805]                                                                                                                                          | *    | 5.93  | *    | *    | * | 2 | 2 | AYRKVLSHVIEQTNASQSK                      | 1 |
|                                                                                                                                                                                                                 |      |       |      |      |   |   | 1 | EYYR                                     | 1 |
| CU063_HUMAN (P58658) Protein C21orf63 precursor (SUE21) [MASS=49483]                                                                                                                                            | *    | 4.08  | *    | *    | * | 1 | 2 | DGEYGINFDPGSKVLRK                        | 1 |
| CUGB1_HUMAN (Q92879) CUG triplet repeat RNA-binding protein 1 (CUG-BP1) (RNA-binding protein BRUNOL-2) (Deadenylation factor CUG-BP) (50 kDa Nuclear polyadenylated RNA-binding protein) (EDEN-BP) [MASS=52063] | *    | 6.58  | *    | *    | * | 2 | 2 | AMHQAQTMEGC[330]SSPM[147]VVKFADTQK       | 1 |
|                                                                                                                                                                                                                 |      |       |      |      |   |   | 1 | SKNDSKPY                                 | 1 |
| CUTA_HUMAN (O60888) Protein CutA precursor (Brain acetylcholinesterase putative membrane anchor) (Acetylcholinesterase-associated protein) [MASS=19116]                                                         | 0.00 | 11.73 | 3.97 | 0.00 | 1 | 1 | 3 | RLAAC[339]VNLIPQITSIYEWK GK              | 1 |
| CUTL1_HUMAN (P39880) Homeobox protein cut-like 1 (CCAAT displacement protein) (CDP) [MASS=164271]                                                                                                               | *    | 2.13  | *    | *    | * | 2 | 3 | ASETGSDEAIKSILEQAK                       | 1 |
|                                                                                                                                                                                                                 |      |       |      |      |   |   | 2 | LAKNGIC[339]QRIFGEK                      | 1 |
| CX022_HUMAN (Q6ZTR5) Protein CXorf22 [MASS=110392]                                                                                                                                                              | 0.00 | 3.07  | 0.23 | 0.00 | 1 | 2 | 2 | RLEC[330]IHFGPVFFGSSK                    | 1 |
|                                                                                                                                                                                                                 |      |       |      |      |   |   | 2 | NYAPVAM[147]LQSAMTR                      | 1 |
|                                                                                                                                                                                                                 |      |       |      |      |   |   | 2 | HGGEDYVFSLLTGYC[339]EPPTGVSLR            | 2 |
| CY1_HUMAN (P08574) Cytochrome c1, heme protein, mitochondrial precursor (Cytochrome c-1) [MASS=35390]                                                                                                           | 1.00 | 16.62 | 1.04 | 0.05 | 6 | 4 | 2 | HLVGVC[330]YTEDEAK                       | 1 |
|                                                                                                                                                                                                                 |      |       |      |      |   |   | 2 | HLVGVC[339]YTEDEAK                       | 1 |
|                                                                                                                                                                                                                 |      |       |      |      |   |   | 2 | HGGEDYVFSLLTGYC[330]EPPTGVSLR            | 1 |
|                                                                                                                                                                                                                 |      |       |      |      |   |   | 2 | GAGLPGARAR                               | 1 |
|                                                                                                                                                                                                                 |      |       |      |      |   |   | 2 | DVC[330]TFLR                             | 1 |
| CYTC_HUMAN (P01034) Cystatin C precursor (Neuroendocrine basic polypeptide) (Gamma-trace) (Post-gamma-globulin) [MASS=15799]                                                                                    | *    | 11.64 | *    | *    | * | 1 | 3 | TQPNLDNC[330]PFHDQPHLK                   | 2 |
| D1IP_HUMAN (Q9NYX4) D1 dopamine receptor-interacting protein calcyon [MASS=23434]                                                                                                                               | *    | 41.01 | *    | *    | * | 3 | 3 | TQTEYQLSSPDQQNFPDLEGQRLNC[339]SHPEEGR    | 1 |
|                                                                                                                                                                                                                 |      |       |      |      |   |   | 3 | DPGDQDGAAM[147]DSVPLISPLDISQLQPPLPDQVVIK | 1 |
|                                                                                                                                                                                                                 |      |       |      |      |   |   | 3 | HKIC[339]TPLTLEM[147]YYTEMDPERHR         | 1 |
| DAPK1_HUMAN (P53355) Death-associated protein kinase 1 (EC 2.7.11.1) (DAP kinase 1) [MASS=160220]                                                                                                               | *    | 2.58  | *    | *    | * | 2 | 2 | TDVILILELVAGGELDFLAEK                    | 1 |
|                                                                                                                                                                                                                 |      |       |      |      |   |   | 2 | LFVLDAGASGSKDMK                          | 1 |

|                                                                                                                                                                                                                                                                              |      |       |      |      |   |   |   |                                               |   |
|------------------------------------------------------------------------------------------------------------------------------------------------------------------------------------------------------------------------------------------------------------------------------|------|-------|------|------|---|---|---|-----------------------------------------------|---|
| DAPK3_HUMAN (O43293) Death-associated protein kinase 3 (EC 2.7.11.1) (DAP kinase 3) (DAP-like kinase) (Dlk) (ZIP-kinase) [MASS=52535]                                                                                                                                        | *    | 3.74  | *    | *    | * | 1 | 2 | LENRYEALAKQVASEM[147]R                        | 1 |
| DAXX_HUMAN (Q9UER7) Death domain-associated protein 6 (Daxx) (hDaxx) (Fas death domain-associated protein) (ETS1-associated protein 1) (EAP1) [MASS=81372]                                                                                                                   | *    | 2.43  | *    | *    | * | 1 | 3 | LC[330]ELKDC[339]SSLTGRVIEQR                  | 1 |
| DB110_HUMAN (Q30KR0) Beta-defensin 110 precursor (Defensin, beta 110) (Beta-defensin 10) (DEFB-10) [MASS=7672]                                                                                                                                                               | 0.00 | 24.19 | 0.83 | 0.00 | 1 | 1 | 3 | TFC[330]DDVEYDYGVC[330]IK                     | 1 |
| DC12_HUMAN (Q96FZ2) UPF0361 protein DC12 [MASS=40575]                                                                                                                                                                                                                        | *    | 5.37  | *    | *    | * | 2 | 1 | VWDNWR                                        | 1 |
|                                                                                                                                                                                                                                                                              |      |       |      |      |   |   | 2 | C[330]VVLADGFYEWQR                            | 1 |
| DCAK2_HUMAN (Q8N568) Serine/threonine-protein kinase DCAMKL2 (EC 2.7.11.1) (Doublecortin-like and CAM kinase-like 2) [MASS=83639]                                                                                                                                            | *    | 2.87  | *    | *    | * | 1 | 2 | SLSDNVNLPQGVRTIYTIDGSR                        | 1 |
| DCE2_HUMAN (Q05329) Glutamate decarboxylase 2 (EC 4.1.1.15) (Glutamate decarboxylase, 65 kDa isoform) (GAD-65) (65 kDa glutamic acid decarboxylase) [MASS=65411]                                                                                                             | *    | 17.61 | *    | *    | * | 4 | 2 | EEGLMQNC[330]NQMHASYLFQQDK                    | 1 |
|                                                                                                                                                                                                                                                                              |      |       |      |      |   |   | 2 | IWMHVDAAWGGGLMSR                              | 1 |
|                                                                                                                                                                                                                                                                              |      |       |      |      |   |   | 3 | KMREIIGWPGSGDGFSPGGAISNMYAM[147]MIAR          | 1 |
|                                                                                                                                                                                                                                                                              |      |       |      |      |   |   | 3 | VNFFRMVISNPAATHQDIDFLIEEIERLGQDL              | 1 |
| DCUP_HUMAN (P06132) Uroporphyrinogen decarboxylase (EC 4.1.1.37) (URO-D) (UPD) [MASS=40787]                                                                                                                                                                                  | *    | 4.36  | *    | *    | * | 1 | 3 | LREAGLAPVPMIIFAK                              | 1 |
| DDR1_HUMAN (Q08345) Epithelial discoidin domain-containing receptor 1 precursor (EC 2.7.10.1) (Epithelial discoidin domain receptor 1) (Tyrosine kinase DDR) (Discoidin receptor tyrosine kinase) (Tyrosine-protein kinase CAK) (Cell adhesion kinase) (TRK E) [MASS=101127] | 0.00 | 5.26  | 0.44 | 0.00 | 1 | 2 | 2 | VLEEELTVHLSVPGDTILINNR                        | 1 |
|                                                                                                                                                                                                                                                                              |      |       |      |      |   |   | 2 | AFQAM[147]QVHC[330]NNMHTLGARLPGGVEC[330]R     | 1 |
| DDX46_HUMAN (Q7L014) Probable ATP-dependent RNA helicase DDX46 (EC 3.6.1.-) (DEAD box protein 46) (PRP5 homolog) [MASS=117460]                                                                                                                                               | *    | 4.94  | *    | *    | * | 2 | 3 | ASYPC[339]M[147]SLHGGIDQYDRDSIINDFKNGTC[330]K | 1 |
|                                                                                                                                                                                                                                                                              |      |       |      |      |   |   | 2 | EGNEMEGEELDPLDAYMEEVK                         | 1 |

|                                                                                                                                                                                                                                                                |      |       |      |      |   |   |   |                                   |   |
|----------------------------------------------------------------------------------------------------------------------------------------------------------------------------------------------------------------------------------------------------------------|------|-------|------|------|---|---|---|-----------------------------------|---|
| DECR_HUMAN (Q16698) 2,4-dienoyl-CoA reductase, mitochondrial precursor (EC 1.3.1.34) (2,4-dienoyl-CoA reductase [NADPH]) (4-enoyl-CoA reductase [NADPH]) [MASS=36067]                                                                                          | 0.00 | 20.00 | 1.29 | 0.00 | 1 | 3 | 2 | LGTVEELANLAAFLC[339]SDYASWINGAVIK | 1 |
|                                                                                                                                                                                                                                                                |      |       |      |      |   |   | 2 | RFFSYGKILYQNTALQSK                | 1 |
|                                                                                                                                                                                                                                                                |      |       |      |      |   |   | 3 | KM[147]DVLKATAEQISSQTGNK          | 1 |
| DEN1A_HUMAN (Q8TEH3) DENN domain-containing protein 1A [MASS=110576]                                                                                                                                                                                           | *    | 3.57  | *    | *    | * | 2 | 2 | LYHQWLSTVRKGGGAILNTVK             | 1 |
|                                                                                                                                                                                                                                                                |      |       |      |      |   |   | 2 | SSARAAETKQGLALR                   | 1 |
| DEST_HUMAN (P60981) Dextrin (Actin-depolymerizing factor) (ADF) [MASS=18374]                                                                                                                                                                                   | 0.99 | 7.32  | 0.57 | 0.00 | 1 | 1 | 2 | HFVGM[147]LPEKDC[330]R            | 1 |
| DGAT1_HUMAN (O75907) Diacylglycerol O-acyltransferase 1 (EC 2.3.1.20) (Diglyceride acyltransferase) (ACAT-related gene product 1) [MASS=55278]                                                                                                                 | *    | 5.74  | *    | *    | * | 1 | 3 | GSSKWM[147]ARTGVFLASAFFHEYLVSVPLR | 1 |
| DGKQ_HUMAN (P52824) Diacylglycerol kinase theta (EC 2.7.1.107) (Diglyceride kinase theta) (DGK-theta) (DAG kinase theta) [MASS=101403]                                                                                                                         | 0.00 | 3.18  | 0.19 | 0.00 | 1 | 2 | 3 | QC[330]HQDGHQDHDTHHHHW            | 1 |
|                                                                                                                                                                                                                                                                |      |       |      |      |   |   | 2 | LRSLVLPAC[330]VR                  | 1 |
| DGKZ_HUMAN (Q13574) Diacylglycerol kinase zeta (EC 2.7.1.107) (Diglyceride kinase zeta) (DGK-zeta) (DAG kinase zeta) [MASS=124122]                                                                                                                             | 0.00 | 2.60  | 0.26 | 0.00 | 1 | 2 | 2 | DLAKHIR                           | 1 |
|                                                                                                                                                                                                                                                                |      |       |      |      |   |   | 2 | SGLQHLAPPPPTPGAPC[330]SESER       | 1 |
| DHB4_HUMAN (P51659) Peroxisomal multifunctional enzyme type 2 (MFE-2) (D-bifunctional protein) (DBP) (17-beta-hydroxysteroid dehydrogenase 4) (17-beta-HSD 4) [Includes: D-3-hydroxyacyl-CoA dehydratase (EC 4.2.1.107) (3-alpha,7-alpha,12-alpha-trihydroxy-5 | 0.99 | 6.67  | 0.48 | 0.00 | 1 | 3 | 3 | ARGNIM[147]LSQKLQM[147]ILK        | 1 |
|                                                                                                                                                                                                                                                                |      |       |      |      |   |   | 2 | SNIHC[330]NTIAPNAGSR              | 1 |
|                                                                                                                                                                                                                                                                |      |       |      |      |   |   | 2 | GNIM[147]LSQKLQMILKDYAK           | 1 |
| DHDDS_HUMAN (Q86SQ9) Dehydrodolichyl diphosphate synthase (EC 2.5.1.-) (Dedol-PP synthase) [MASS=38689]                                                                                                                                                        | *    | 6.31  | *    | *    | * | 1 | 2 | C[330]QVERQEGHSQGFNKLAETLR        | 1 |

|                                                                                                                                                                            |      |       |      |      |    |   |  |   |                                               |   |
|----------------------------------------------------------------------------------------------------------------------------------------------------------------------------|------|-------|------|------|----|---|--|---|-----------------------------------------------|---|
|                                                                                                                                                                            |      |       |      |      |    |   |  | 3 | AKPYEGSILEADC[339]DILIPAASEK                  | 1 |
|                                                                                                                                                                            |      |       |      |      |    |   |  | 2 | AKPYEGSILEADC[339]DILIPAASEK                  | 2 |
|                                                                                                                                                                            |      |       |      |      |    |   |  | 3 | AKPYEGSILEADC[330]DILIPAASEK                  | 1 |
|                                                                                                                                                                            |      |       |      |      |    |   |  | 2 | IIKPC[339]NHVLSLSFPIR                         | 1 |
|                                                                                                                                                                            |      |       |      |      |    |   |  | 2 | IIKPC[330]NHVLSLSFPIR                         | 1 |
| DHE3_HUMAN (P00367) Glutamate dehydrogenase 1, mitochondrial precursor (EC 1.4.1.3) (GDH) [MASS=61397]                                                                     | 1.00 | 13.44 | 2.19 | 0.03 | 13 | 4 |  | 2 | TFVVQGFGNVGLHSM[147]RYLHRFGAK                 | 1 |
|                                                                                                                                                                            |      |       |      |      |    |   |  | 2 | C[339]AVVDVPPFGGAK                            | 3 |
|                                                                                                                                                                            |      |       |      |      |    |   |  | 1 | C[330]AVVDVPPFGGAK                            | 1 |
|                                                                                                                                                                            |      |       |      |      |    |   |  | 1 | C[339]AVVDVPPFGGAK                            | 1 |
|                                                                                                                                                                            |      |       |      |      |    |   |  | 2 | AKPYEGSILEADC[330]DILIPAASEK                  | 2 |
| DHE4_HUMAN                                                                                                                                                                 | 0.00 | 5.02  | *    | *    | *  | 1 |  | 3 | GVFHGIENFINEASYMSILGMTPGFRDK                  | 1 |
| DHPR_HUMAN (P09417) Dihydropteridine reductase (EC 1.5.1.34) (HDHPR) (Quinoid dihydropteridine reductase) [MASS=25803]                                                     | 0.96 | 5.33  | 0.57 | 0.00 | 1  | 1 |  | 2 | GAVHQLC[330]QSLAGK                            | 1 |
| DHR11_HUMAN (Q6UWP2) Dehydrogenase/reductase SDR family member 11 precursor (EC 1.-.-) [MASS=28308]                                                                        | 0.00 | 16.92 | 5.62 | 0.00 | 1  | 2 |  | 3 | C[339]LKPEDVAEAVIYVLSTPAHIQIGDIQMR            | 1 |
|                                                                                                                                                                            |      |       |      |      |    |   |  | 2 | DMFNVNVLALSIC[339]TR                          | 1 |
|                                                                                                                                                                            |      |       |      |      |    |   |  | 3 | GC[339]GPEKDHVYLQLHLLPPEQLATR                 | 1 |
|                                                                                                                                                                            |      |       |      |      |    |   |  | 2 | TYFSC[330]TSAHTSTGDGTAM[147]ITR               | 1 |
| DHSA_HUMAN (P31040) Succinate dehydrogenase [ubiquinone] flavoprotein subunit, mitochondrial precursor (EC 1.3.5.1) (Fp) (Flavoprotein subunit of complex II) [MASS=72691] | 1.00 | 16.87 | 1.08 | 0.07 | 6  | 5 |  | 3 | AGLPC[339]QDLEFVQFHPTGIYGAGC[330]LITEGC[339]R | 1 |
|                                                                                                                                                                            |      |       |      |      |    |   |  | 2 | TSELRLSMQKSMQNHAAVFR                          | 1 |
|                                                                                                                                                                            |      |       |      |      |    |   |  | 3 | AGLPC[330]QDLEFVQFHPTGIYGAGC[330]LITEGC[330]R | 1 |
|                                                                                                                                                                            |      |       |      |      |    |   |  | 2 | AAFGLSEAGFNTAC[339]VTK                        | 1 |
|                                                                                                                                                                            |      |       |      |      |    |   |  | 2 | C[330]HTIM[147]NC[330]TR                      | 2 |
| DHSB_HUMAN (P21912) Succinate dehydrogenase [ubiquinone] iron-sulfur protein, mitochondrial precursor (EC 1.3.5.1) (Ip) (Iron-sulfur subunit of complex II) [MASS=31630]   | 1.00 | 11.43 | 1.06 | 0.05 | 6  | 2 |  | 2 | C[330]GPM[147]VLDALIKIKNEVDSTLTFR             | 1 |
|                                                                                                                                                                            |      |       |      |      |    |   |  | 2 | C[339]HTIMNC[339]TR                           | 1 |
|                                                                                                                                                                            |      |       |      |      |    |   |  | 2 | C[330]HTIMNC[330]TR                           | 1 |
|                                                                                                                                                                            |      |       |      |      |    |   |  | 2 | C[339]HTIM[147]NC[339]TR                      | 2 |
| DHX30_HUMAN (Q7L2E3) Putative ATP-dependent RNA helicase DHX30 (EC 3.6.1.-) (DEAH box protein 30) [MASS=133937]                                                            | *    | 7.37  | *    | *    | *  | 4 |  | 3 | SELAALPPSVQEEHGQLLALLAELLR                    | 1 |
|                                                                                                                                                                            |      |       |      |      |    |   |  | 2 | GLQLRNPALRLVLSATGDNER                         | 1 |
|                                                                                                                                                                            |      |       |      |      |    |   |  | 2 | NLLAKVIQIATSSSTAKNLM[147]QFHTVGTK             | 1 |
|                                                                                                                                                                            |      |       |      |      |    |   |  | 2 | VIQIATSSSTAK                                  | 1 |

|                                                                                                                                                                          |      |      |      |      |   |   |                       |                                                                                                                                                                              |                       |
|--------------------------------------------------------------------------------------------------------------------------------------------------------------------------|------|------|------|------|---|---|-----------------------|------------------------------------------------------------------------------------------------------------------------------------------------------------------------------|-----------------------|
| DHX57_HUMAN (Q6P158) Putative ATP-dependent RNA helicase DHX57 (EC 3.6.1.-) (DEAH box protein 57) [MASS=155603]                                                          | *    | 4.33 | *    | *    | * | 2 | 3                     | GGRSHASKSHGSGGGGGGGGGGGGNR<br>HQVVVISGMTGC[330]GKTTQIPQFILDSDLNGPPEK                                                                                                         | 1<br>1                |
| DHX8_HUMAN (Q14562) ATP-dependent RNA helicase DHX8 (EC 3.6.1.-) (DEAH box protein 8) (RNA helicase HRH1) [MASS=139314]                                                  | *    | 4.92 | *    | *    | * | 3 | 2<br>3<br>2           | NLVGETNEETSM[147]RNPDR<br>EQLVQAVHDNQILIVIGETGSGK<br>DLAEFVISLAEKNTTFDFTK                                                                                                    | 1<br>1<br>1           |
| DHX9_HUMAN (Q08211) ATP-dependent RNA helicase A (EC 3.6.1.-) (Nuclear DNA helicase II) (NDH II) (DEAH box protein 9) [MASS=140880]                                      | *    | 3.23 | *    | *    | * | 2 | 2<br>3                | LETHM[147]TPEM[147]FR<br>FM[147]C[339]EVQVEGYNYTGM[147]GNSTNKKDAQSNAAR                                                                                                       | 1<br>1                |
| DIAP3_HUMAN (Q9NSV4) Protein diaphanous homolog 3 (Diaphanous-related formin-3) (DRF3) [MASS=127594]                                                                     | *    | 2.16 | *    | *    | * | 2 | 2<br>3                | LHIRNEFM[147]R<br>AVDPRHPNM[147]MTDVVK                                                                                                                                       | 1<br>1                |
| DISC1_HUMAN (Q9NR15) Disrupted in schizophrenia 1 protein [MASS=93582]                                                                                                   | 0.00 | 4.10 | 1.19 | 0.00 | 1 | 2 | 2<br>2<br>3           | EAAASC[339]M[147]TAGVHEAQA<br>SSTGPGIGFLSPAVGTLFR<br>PC[339]AEDYFNFM[147]GHFTKPQQLQEEM[147]K                                                                                 | 1<br>1<br>1           |
| DJBP_HUMAN (Q5THR3) DJ-1-binding protein (CAP-binding protein complex-interacting protein 1) [MASS=172929]                                                               | 0.00 | 8.99 | 1.15 | 0.00 | 1 | 5 | 3<br>3<br>3<br>2      | ELM[147]QM[147]LDPGDTGVVNTSMFIDLIEENC[330]R<br>DPYSAFFKTDADRDIINMHDLHR<br>ALSAGDPC[339]KGGYVSFNLYKIVLDTFVYQIPR<br>INVHDFKKVLEDTGM[147]PM[147]DDDQYALLTTK                     | 1<br>1<br>1<br>1      |
| DKK3_HUMAN (Q9UBP4) Dickkopf-related protein 3 precursor (Dkk-3) (Dickkopf-3) (hDkk-3) [MASS=38291]                                                                      | 0.78 | 6.57 | 0.81 | 0.00 | 1 | 1 | 3                     | GLLFPVC[330]TPLPVEGELC[330]HDPASR                                                                                                                                            | 1                     |
| DLDH_HUMAN (P09622) Dihydrolipoyl dehydrogenase, mitochondrial precursor (EC 1.8.1.4) (Dihydrolipoamide dehydrogenase) (Glycine cleavage system L protein) [MASS=54150]  | 0.97 | 5.50 | 1.42 | 0.00 | 1 | 2 | 2<br>2                | TNADTDGM[147]VKILGQK<br>VC[339]HAHPTLSEAFR                                                                                                                                   | 1<br>1                |
| DMBT1_HUMAN (Q9UGM3) Deleted in malignant brain tumors 1 protein precursor (Glycoprotein 340) (Gp-340) (Surfactant pulmonary-associated D-binding protein) [MASS=260734] | *    | 0.46 | *    | *    | * | 1 | 3                     | RTDLRIHVSC[339]R                                                                                                                                                             | 1                     |
| DMXL1_HUMAN (Q9Y485) Protein DmX-like 1 (X-like 1 protein) [MASS=337852]                                                                                                 | *    | 4.03 | *    | *    | * | 5 | 2<br>3<br>2<br>3<br>3 | YM[147]PRASVC[330]NVLITC[339]C[330]KDNVC[330]R<br>M[147]EQMSLM[147]ALADTIATTSTDIGESRDR<br>VWYNVENWRTAVTSPDGSSEK<br>VVPLSKFVLLRSVDLVSSVDGSPFPVSLSWVR<br>SLGKDSILSNAGSSPNGFSEK | 1<br>1<br>1<br>1<br>1 |

|                                                                                                                                                                                                        |   |       |      |      |      |   |                       |                                                                                                                             |                                                                                                                            |                       |
|--------------------------------------------------------------------------------------------------------------------------------------------------------------------------------------------------------|---|-------|------|------|------|---|-----------------------|-----------------------------------------------------------------------------------------------------------------------------|----------------------------------------------------------------------------------------------------------------------------|-----------------------|
| DMXL2_HUMAN (Q8TDJ6) Protein DmX-like 2 (Rabconnectin-3) [MASS=339755]                                                                                                                                 | * | 3.03  | *    | *    | *    | 5 | 2<br>3<br>2<br>2<br>3 | AVVWGLFR<br>HAVKFGDTEADSSNAEEAAM[147]QDHSTFK<br>C[339]IAGEVAIVRDPDAGEGTK<br>EIAALHEIC[330]NHESVIKEYSSKTYSK<br>NLRLYQAVVDARK | 1<br>1<br>1<br>1<br>1                                                                                                      |                       |
| DNAI2_HUMAN (Q9GZS0) Dynein intermediate chain 2, axonemal (Axonemal dynein intermediate chain 2) [MASS=68851]                                                                                         |   | 0.00  | 9.26 | 3.24 | 0.00 | 1 | 3                     | 2<br>2<br>2                                                                                                                 | KVEKDENVVNAIMQLGSIM[147]EHC[339]IK<br>DENYVNAIMQLGSIMEHC[339]IK<br>DVNPLELEQTIR                                            | 1<br>1<br>1           |
| DNJA2_HUMAN (O60884) DnaJ homolog subfamily A member 2 (HIRA-interacting protein 4) (Cell cycle progression restoration gene 3 protein) (Dnj3) (NY-REN-14 antigen) [MASS=45745]                        |   | 0.00  | 8.98 | 1.61 | 0.00 | 1 | 2                     | 2<br>2                                                                                                                      | IGLVEALC[339]GFQFTFK<br>GEDMMHPLKVSLEDLYNGKTTK                                                                             | 1<br>1                |
| DNS2B_HUMAN (Q8WZ79) Deoxyribonuclease-2-beta precursor (EC 3.1.22.1) (Deoxyribonuclease II beta) (DNase II beta) (DNase2-like acid DNase) (DNase II-like acid DNase) (Endonuclease DLAD) [MASS=41712] |   | 0.00  | 2.49 | 0.55 | 0.00 | 1 | 1                     | 2                                                                                                                           | WTC[330]IGDLNR                                                                                                             | 1                     |
| DOC10_HUMAN (Q96BY6) Dedicator of cytokinesis protein 10 (Protein zizimin 3) [MASS=249311]                                                                                                             | * | 0.78  | *    | *    | *    | 1 | 2                     | 2                                                                                                                           | SQTLPIIRGKNALSMPK                                                                                                          | 1                     |
| DOCK1_HUMAN (Q14185) Dedicator of cytokinesis protein 1 (180 kDa protein downstream of CRK) (DOCK180) [MASS=215374]                                                                                    | * | 1.29  | *    | *    | *    | 2 | 3<br>1                | ATIPIFFDMM[147]QC[330]EFHSTR<br>RGSRPR                                                                                      | 1<br>1                                                                                                                     |                       |
| DOCK4_HUMAN (Q8N110) Dedicator of cytokinesis protein 4 [MASS=225147]                                                                                                                                  |   | 0.00  | 4.83 | 0.63 | 0.00 | 1 | 5                     | 2<br>2<br>3<br>3<br>3                                                                                                       | TELNKEEMYIRYIHK<br>THPDKITGC[330]LSK<br>PC[330]SAIYPTPVPEPSQRMLFNHIGDGALPR<br>LPFSKGIFLGNNNQAMK<br>AQNFTAAAYTLLLYDELLEWSDR | 1<br>1<br>1<br>1<br>1 |
| DOCK8_HUMAN (Q8NF50) Dedicator of cytokinesis protein 8 [MASS=230819]                                                                                                                                  | * | 3.45  | *    | *    | *    | 4 | 2<br>3<br>2<br>2      | TRISVIQKEEFVLTPIEVAIEDM[147]K<br>WAEGHKGVFNIEVQAVSSVHTQDNHLEK<br>LC[339]FKEFIMR<br>FPGLNENLR                                | 1<br>1<br>1<br>1                                                                                                           |                       |
| DOK1_HUMAN (Q99704) Docking protein 1 (Downstream of tyrosine kinase 1) (p62(dok)) (pp62) [MASS=52391]                                                                                                 |   | 0.00  | 6.44 | 0.44 | 0.00 | 1 | 1                     | 3                                                                                                                           | LDC[330]KVIRLAEC[330]VSVAPVTVETPPEPGATAFR                                                                                  | 1                     |
| DOK3_HUMAN (Q7L591) Docking protein 3 (Downstream of tyrosine kinase 3) [MASS=53288]                                                                                                                   | * | 17.94 | *    | *    | *    | 3 | 2<br>3<br>3           | ATSLPSLDTPGELREMPGPEPPTSRLK<br>GLVPMEENSIYSSWQEVGEFPPVVVQRTEAATR<br>QAWMGPIC[339]QLAFPQGTGEASSGSTDAQSPKR                    | 1<br>1<br>1                                                                                                                |                       |



|                                                                                                                                                                                                                                     |      |       |      |      |   |   |   |                               |   |
|-------------------------------------------------------------------------------------------------------------------------------------------------------------------------------------------------------------------------------------|------|-------|------|------|---|---|---|-------------------------------|---|
| DPP6_HUMAN (P42658) Dipeptidyl aminopeptidase-like protein 6 (Dipeptidylpeptidase VI) (Dipeptidylpeptidase 6) (Dipeptidyl peptidase IV-like protein) (Dipeptidyl aminopeptidase-related protein) (DPPX) [MASS=97587]                | *    | 3.35  | *    | *    | * | 2 | 3 | MREYYITM[147]VKWATSTK         | 1 |
|                                                                                                                                                                                                                                     |      |       |      |      |   |   | 3 | KFFFIRAIPQGGR                 | 1 |
| DPYL2_HUMAN (Q16555) Dihydropyrimidinase-related protein 2 (DRP-2) (Collapsin response mediator protein 2) (CRMP-2) (N2A3) [MASS=62293]                                                                                             | 1.00 | 12.41 | 0.49 | 0.08 | 5 | 4 | 2 | FQLTDC[330]QIYEVLSVIR         | 1 |
|                                                                                                                                                                                                                                     |      |       |      |      |   |   | 2 | THNSSLEYNIFEGM[147]EC[339]R   | 1 |
|                                                                                                                                                                                                                                     |      |       |      |      |   |   | 2 | THNSSLEYNIFEGM[147]EC[330]R   | 1 |
|                                                                                                                                                                                                                                     |      |       |      |      |   |   | 2 | FQLTDC[339]QIYEVLSVIR         | 1 |
|                                                                                                                                                                                                                                     |      |       |      |      |   |   | 2 | GGKIVNDDQSFYADIYM[147]EDGLIK  | 1 |
|                                                                                                                                                                                                                                     |      |       |      |      |   |   | 2 | GLYDGPVC[330]EVSVTPK          | 1 |
| DRP2_HUMAN (Q13474) Dystrophin-related protein 2 [MASS=107673]                                                                                                                                                                      | *    | 8.07  | *    | *    | * | 3 | 3 | LHYPIMEYYTPTTSSENMRDFATTLKMK  | 1 |
|                                                                                                                                                                                                                                     |      |       |      |      |   |   | 3 | ATWEPIGDLFIDSLPEHIQAIKLFK     | 1 |
|                                                                                                                                                                                                                                     |      |       |      |      |   |   | 2 | M[147]TELYQTLADLNNIKFSAYRTAMK | 1 |
| DSC1_HUMAN (Q08554) Desmocollin-1 precursor (Desmosomal glycoprotein 2/3) (DG2/DG3) [MASS=100044]                                                                                                                                   | *    | 2.35  | *    | *    | * | 1 | 2 | VNLEEC[330]LKSASLIRSSDPAFR    | 1 |
|                                                                                                                                                                                                                                     |      |       |      |      |   |   | 3 | DLGIVVEGFMKRIEEK              | 4 |
| DUET_HUMAN (Q9Y2A5) Serine/threonine-protein kinase Duet (EC 2.7.11.1) (Serine/threonine kinase with Dbl- and pleckstrin homology domain) [MASS=144412]                                                                             | *    | 1.94  | *    | *    | * | 2 | 2 | LAC[330]FIERRK                | 1 |
|                                                                                                                                                                                                                                     |      |       |      |      |   |   | 2 | LAC[330]FIERRK                | 1 |
| DUS4_HUMAN (Q13115) Dual specificity protein phosphatase 4 (EC 3.1.3.48) (EC 3.1.3.16) (Mitogen-activated protein kinase phosphatase 2) (MAP kinase phosphatase 2) (MKP-2) (Dual specificity protein phosphatase hVH2) [MASS=42953] | 0.00 | 6.35  | 0.79 | 0.00 | 1 | 2 | 2 | VRLEEAFFVQKQR                 | 1 |
|                                                                                                                                                                                                                                     |      |       |      |      |   |   | 2 | SATIC[339]LAYLM[147]M[147]K   | 1 |
| DX26B_HUMAN (Q5JSJ4) Protein DDX26B [MASS=96672]                                                                                                                                                                                    | *    | 5.34  | *    | *    | * | 3 | 2 | RPGEPNSPMSSKR                 | 1 |
|                                                                                                                                                                                                                                     |      |       |      |      |   |   | 2 | NPFFLEPSILITITDGNK            | 1 |
|                                                                                                                                                                                                                                     |      |       |      |      |   |   | 3 | NLQASGLTTLGQALR               | 1 |

|                                                                                                                                                                                                  |      |       |      |      |   |   |   |   |                                               |   |
|--------------------------------------------------------------------------------------------------------------------------------------------------------------------------------------------------|------|-------|------|------|---|---|---|---|-----------------------------------------------|---|
|                                                                                                                                                                                                  |      |       |      |      |   |   |   | 3 | AC[330]PPKPSKWILDITWLNLVLSK                   | 1 |
|                                                                                                                                                                                                  |      |       |      |      |   |   |   | 2 | EAKRALLDAR                                    | 1 |
|                                                                                                                                                                                                  |      |       |      |      |   |   |   | 3 | ALLDARHNYLFAIVASC[330]LDLNLK                  | 1 |
|                                                                                                                                                                                                  |      |       |      |      |   |   |   | 3 | THLM[147]EDVTANKRR                            | 3 |
| DYH5_HUMAN (Q8TE73) Ciliary dynein heavy chain 5 (Axonemal beta dynein heavy chain 5) (HL1) [MASS=529002]                                                                                        | *    | 3.29  | *    | *    | * |   | 9 |   |                                               |   |
|                                                                                                                                                                                                  |      |       |      |      |   |   |   | 2 | GWALDNMVLVC[339]NEVTK                         | 1 |
|                                                                                                                                                                                                  |      |       |      |      |   |   |   | 3 | QEYQLC[330]FHKTK                              | 1 |
|                                                                                                                                                                                                  |      |       |      |      |   |   |   | 2 | MEVLEAFVITQSINMLQGLIPLK                       | 1 |
|                                                                                                                                                                                                  |      |       |      |      |   |   |   | 2 | DSNSASNMK                                     | 1 |
|                                                                                                                                                                                                  |      |       |      |      |   |   |   | 3 | QFPITLLQMSIKFANDPPQGLRAGLK                    | 1 |
| DYH9_HUMAN (Q9NYC9) Ciliary dynein heavy chain 9 (Axonemal beta dynein heavy chain 9) [MASS=511928]                                                                                              | 0.00 | 1.96  | 4.37 | 0.00 | 1 | 4 |   | 3 | GDFQGLVEIMGHLM[147]AVKER                      | 1 |
|                                                                                                                                                                                                  |      |       |      |      |   |   |   | 3 | EMKHMPETAAAM[147]FSSRDFYR                     | 1 |
|                                                                                                                                                                                                  |      |       |      |      |   |   |   | 2 | C[339]AGSAEAEQLLQAFLGR                        | 1 |
|                                                                                                                                                                                                  |      |       |      |      |   |   |   | 3 | IPSLVPRLSPQNGSPHYQVDLDGIPDLANM[147]RR         | 1 |
| DYHC_HUMAN (Q14204) Dynein heavy chain, cytosolic (DYHC) (Cytoplasmic dynein heavy chain 1) (DHC1) (Dynein heavy chain 1, cytoplasmic 1) [MASS=532404]                                           | 0.00 | 2.67  | 0.92 | 0.00 | 1 | 5 |   | 2 | KMFAGVSSIILNEDNSVVLGISSREGEEVM[147]FK         | 1 |
|                                                                                                                                                                                                  |      |       |      |      |   |   |   | 3 | GEAVDEGEIAENLPEQEILIQSVC[339]ETM[147]VPK      | 1 |
|                                                                                                                                                                                                  |      |       |      |      |   |   |   | 2 | HLLPVETQR                                     | 1 |
|                                                                                                                                                                                                  |      |       |      |      |   |   |   | 3 | EVDGLDVSKEGTEAWEAAM[147]KR                    | 1 |
|                                                                                                                                                                                                  |      |       |      |      |   |   |   | 3 | MNTLLANGEVPGLFEGDEYATLM[147]TQC[330]KEGAQK    | 1 |
| DYL1_HUMAN (P63167) Dynein light chain 1, cytoplasmic (Dynein light chain LC8-type 1) (8 kDa dynein light chain) (DLC8) (Protein inhibitor of neuronal nitric oxide synthase) (PIN) [MASS=10366] | 1.00 | 12.36 | 0.60 | 0.05 | 2 | 1 |   | 2 | YNPTWHC[330]IVGR                              | 1 |
|                                                                                                                                                                                                  |      |       |      |      |   |   |   | 2 | YNPTWHC[339]IVGR                              | 1 |
| DYL2_HUMAN                                                                                                                                                                                       | 1.00 | 34.83 | *    | *    | * | 1 |   | 3 | AVIKNADM[147]SEDMQQDAVDC[339]ATQAMEKYNIEK     | 1 |
| DYN1_HUMAN (Q05193) Dynamin-1 (EC 3.6.5.5) [MASS=97407]                                                                                                                                          | 1.00 | 5.21  | 0.51 | 0.10 | 2 | 2 |   | 2 | C[330]VDM[147]VISELISTVR                      | 1 |
|                                                                                                                                                                                                  |      |       |      |      |   |   |   | 2 | C[330]VDMVISELISTVR                           | 1 |
|                                                                                                                                                                                                  |      |       |      |      |   |   |   | 3 | DM[147]LM[147]QFVTKENC[339]LILAVSPANSDLANSALK | 1 |
| DYN3_HUMAN (Q9UQ16) Dynamin-3 (EC 3.6.5.5) (Dynamin, testicular) (T-dynamin) [MASS=96681]                                                                                                        | 0.00 | 2.56  | 1.19 | 0.00 | 1 | 1 |   | 2 | ENC[339]LILAVTPANTDLANSALK                    | 1 |
| DYRL1_HUMAN (Q86XF0) Dihydrofolate reductase-like protein 1 [MASS=21620]                                                                                                                         | 0.00 | 9.63  | 0.93 | 0.00 | 1 | 2 |   | 1 | SLDDALK                                       | 1 |
|                                                                                                                                                                                                  |      |       |      |      |   |   |   | 2 | HIKYKFEVC[330]EK                              | 1 |
| E2F5_HUMAN (Q15329) Transcription factor E2F5 (E2F-5) [MASS=37610]                                                                                                                               | 0.00 | 9.54  | *    | *    | * | 2 |   | 2 | SSM[147]ATQNLPEQHVSR                          | 2 |
|                                                                                                                                                                                                  |      |       |      |      |   |   |   | 2 | AEIEDLELKERELDQQK                             | 1 |

|                                                                                                                                                                                                                                                              |      |       |      |      |   |   |   |                                                |   |
|--------------------------------------------------------------------------------------------------------------------------------------------------------------------------------------------------------------------------------------------------------------|------|-------|------|------|---|---|---|------------------------------------------------|---|
| EAA2_HUMAN (P43004) Excitatory amino acid transporter 2 (Sodium-dependent glutamate/aspartate transporter 2) [MASS=62104]                                                                                                                                    | 1.00 | 12.89 | 0.36 | 0.48 | 6 | 4 | 2 | ESNSNQC[339]VYAAHNSVIVDEC[339]K                | 1 |
|                                                                                                                                                                                                                                                              |      |       |      |      |   |   | 3 | LASPIHPDVVM[147]LIAFPGDILMR                    | 1 |
|                                                                                                                                                                                                                                                              |      |       |      |      |   |   | 2 | NLFPENLVQAC[330]FQQIQTGTK                      | 3 |
| ECH1_HUMAN (Q13011) Delta3,5-delta2,4-dienoyl-CoA isomerase, mitochondrial precursor (EC 5.3.3.-) [MASS=35816]                                                                                                                                               | 1.00 | 16.16 | 1.34 | 0.08 | 3 | 3 | 2 | NLFPENLVQAC[339]FQQIQTGTK                      | 1 |
|                                                                                                                                                                                                                                                              |      |       |      |      |   |   | 3 | NLFPENLVQAC[330]FQQIQTGTK                      | 1 |
|                                                                                                                                                                                                                                                              |      |       |      |      |   |   | 2 | C[339]LEENLGIDKR                               | 1 |
| ECHA_HUMAN (P40939) Trifunctional enzyme subunit alpha, mitochondrial precursor (TP-alpha) (78 kDa gastrin-binding protein) [Includes: Long-chain enoyl-CoA hydratase (EC 4.2.1.17); Long chain 3-hydroxyacyl-CoA dehydrogenase (EC 1.1.1.211)] [MASS=82999] | 1.00 | 18.35 | 1.51 | 0.08 | 7 | 7 | 2 | YC[330]AQDAFFQVK                               | 1 |
|                                                                                                                                                                                                                                                              |      |       |      |      |   |   | 3 | KM[147]MADEALGSLVSRVFPDK                       | 1 |
|                                                                                                                                                                                                                                                              |      |       |      |      |   |   | 3 | VFPDKEVMLDAALALAAEISSK                         | 1 |
| ECHM_HUMAN (P30084) Enoyl-CoA hydratase, mitochondrial precursor (EC 4.2.1.17) (Short chain enoyl-CoA hydratase) (SCEH) (Enoyl-CoA hydratase 1) [MASS=31387]                                                                                                 | 1.00 | 12.07 | 1.54 | 0.06 | 4 | 2 | 2 | YC[339]AQDAFFQVK                               | 2 |
|                                                                                                                                                                                                                                                              |      |       |      |      |   |   | 2 | M[147]VAC[339]RAIGILSR                         | 1 |
|                                                                                                                                                                                                                                                              |      |       |      |      |   |   | 2 | EVEAVIPDHC[339]IFASNTSALPISEIAAVSK             | 1 |
| ECHP_HUMAN (Q08426) Peroxisomal bifunctional enzyme (PBE) (PBE) [Includes: Enoyl-CoA hydratase (EC 4.2.1.17); 3,2-trans-enoyl-CoA isomerase (EC 5.3.3.8); 3-hydroxyacyl-CoA dehydrogenase (EC 1.1.1.35)] [MASS=79208]                                        | *    | 2.08  | *    | *    | * | 1 | 2 | ALM[147]GLYHGQVLC[330]K                        | 1 |
|                                                                                                                                                                                                                                                              |      |       |      |      |   |   | 3 | QFTPC[330]QLLADHANSNKK                         | 1 |
|                                                                                                                                                                                                                                                              |      |       |      |      |   |   | 2 | ALM[147]GLYHGQVLC[339]K                        | 1 |
| EDD1_HUMAN (O95071) Ubiquitin-protein ligase EDD1 (EC 6.3.2.-) (Hyperplastic discs protein homolog) (hHYD) (Progesterin-induced protein) [MASS=309350]                                                                                                       | 0.00 | 3.86  | 1.58 | 0.00 | 1 | 6 | 2 | VFGERFGGNGPELLTQM[147]VSK                      | 1 |
|                                                                                                                                                                                                                                                              |      |       |      |      |   |   | 3 | PGC[330]FIAGADINM[147]LAAC[330]KTLQEVTQLSQEAQR | 1 |
|                                                                                                                                                                                                                                                              |      |       |      |      |   |   | 2 | QFTPC[330]QLLADHANSNKK                         | 1 |
| ECHM_HUMAN (P30084) Enoyl-CoA hydratase, mitochondrial precursor (EC 4.2.1.17) (Short chain enoyl-CoA hydratase) (SCEH) (Enoyl-CoA hydratase 1) [MASS=31387]                                                                                                 | 1.00 | 12.07 | 1.54 | 0.06 | 4 | 2 | 2 | TGIEQGS DAGYLC[339]ESQK                        | 1 |
|                                                                                                                                                                                                                                                              |      |       |      |      |   |   | 3 | QFTPC[339]QLLADHANSNKK                         | 1 |
|                                                                                                                                                                                                                                                              |      |       |      |      |   |   | 2 | ALNALC[330]DGLIDELNQALK                        | 1 |
| ECHM_HUMAN (P30084) Enoyl-CoA hydratase, mitochondrial precursor (EC 4.2.1.17) (Short chain enoyl-CoA hydratase) (SCEH) (Enoyl-CoA hydratase 1) [MASS=31387]                                                                                                 | 1.00 | 12.07 | 1.54 | 0.06 | 4 | 2 | 2 | ALNALC[339]DGLIDELNQALK                        | 1 |
|                                                                                                                                                                                                                                                              |      |       |      |      |   |   | 3 | IC[339]PVETLVEEAIQC[339]AEK                    | 1 |
|                                                                                                                                                                                                                                                              |      |       |      |      |   |   | 3 | ALNALC[339]DGLIDELNQALK                        | 1 |
| ECHP_HUMAN (Q08426) Peroxisomal bifunctional enzyme (PBE) (PBE) [Includes: Enoyl-CoA hydratase (EC 4.2.1.17); 3,2-trans-enoyl-CoA isomerase (EC 5.3.3.8); 3-hydroxyacyl-CoA dehydrogenase (EC 1.1.1.35)] [MASS=79208]                                        | *    | 2.08  | *    | *    | * | 1 | 2 | TFGLILGHVVDEIQR                                | 1 |
|                                                                                                                                                                                                                                                              |      |       |      |      |   |   | 1 | M[147]TAREEASLR                                | 1 |
|                                                                                                                                                                                                                                                              |      |       |      |      |   |   | 2 | AAVIIMAVEKQTLM[147]QHILR                       | 1 |
| EDD1_HUMAN (O95071) Ubiquitin-protein ligase EDD1 (EC 6.3.2.-) (Hyperplastic discs protein homolog) (hHYD) (Progesterin-induced protein) [MASS=309350]                                                                                                       | 0.00 | 3.86  | 1.58 | 0.00 | 1 | 6 | 2 | KANAHFILK                                      | 1 |
|                                                                                                                                                                                                                                                              |      |       |      |      |   |   | 3 | NVAIFTAGQESPIILRDGNGTIYPM[147]AKDC[339]MGGIR   | 1 |
|                                                                                                                                                                                                                                                              |      |       |      |      |   |   | 2 | SSGLRAGSRR                                     | 1 |
| EDD1_HUMAN (O95071) Ubiquitin-protein ligase EDD1 (EC 6.3.2.-) (Hyperplastic discs protein homolog) (hHYD) (Progesterin-induced protein) [MASS=309350]                                                                                                       | 0.00 | 3.86  | 1.58 | 0.00 | 1 | 6 | 3 | DEPGE GSGVARSFYTAIAQAFLSNEK                    | 1 |

|                                                                                                                                                                |                                         |       |      |      |    |   |        |                                                          |        |
|----------------------------------------------------------------------------------------------------------------------------------------------------------------|-----------------------------------------|-------|------|------|----|---|--------|----------------------------------------------------------|--------|
| EF1A1_HUMAN (P68104) Elongation factor 1-alpha 1 (EF-1-alpha-1) (Elongation factor 1 A-1) (eEF1A-1) (Elongation factor Tu) (EF-Tu) [MASS=50141]                | 0.00                                    | 1.52  | 0.84 | 0.00 | 1  | 1 | 2      | C[330]GGIDKR                                             | 1      |
| EF1A2_HUMAN (Q05639) Elongation factor 1-alpha 2 (EF-1-alpha-2) (Elongation factor 1 A-2) (eEF1A-2) (Statin S1) [MASS=50470]                                   | 0.00                                    | 6.91  | *    | *    | *  | 1 | 2      | IGYNPATVPFVPIGWGHDNMLEPSPNM[147]PWFK                     | 1      |
| EF2_HUMAN (P13639) Elongation factor 2 (EF-2) [MASS=95206]                                                                                                     | *                                       | 4.43  | *    | *    | *  | 2 | 2<br>3 | IKPVLN[147]MNMK[147]DR<br>WLPAGDALLQMITIHLPSVTAQKYR      | 1<br>1 |
| EFTS_HUMAN (P43897) Elongation factor Ts, mitochondrial precursor (EF-Ts) (EF-TsMt) [MASS=35390]                                                               | *                                       | 5.23  | *    | *    | *  | 1 | 3      | DQLALAIGKLGEM[147]ILK                                    | 1      |
| EFTU_HUMAN (P49411) Elongation factor Tu, mitochondrial precursor (EF-Tu) (P43) [MASS=49541]                                                                   | 1.00                                    | 19.91 | 1.25 | 0.03 | 13 | 5 | 2      | GLVM[147]VKPGSIKPHQK                                     | 1      |
|                                                                                                                                                                |                                         |       |      |      |    |   | 3      | HYAHTDC[330]PGHADYVK                                     | 2      |
|                                                                                                                                                                |                                         |       |      |      |    |   | 2      | KGDEC[330]JELLGHSK                                       | 1      |
|                                                                                                                                                                |                                         |       |      |      |    |   | 2      | KGDEC[339]JELLGHSK                                       | 1      |
|                                                                                                                                                                |                                         |       |      |      |    |   | 3      | LLDAVDYIPVVPAR                                           | 1      |
|                                                                                                                                                                |                                         |       |      |      |    |   | 2      | HYAHTDC[339]PGHADYVK                                     | 3      |
| 3                                                                                                                                                              | HYAHTDC[339]PGHADYVK                    | 3     |      |      |    |   |        |                                                          |        |
| 2                                                                                                                                                              | HYAHTDC[330]PGHADYVK                    | 1     |      |      |    |   |        |                                                          |        |
| 3                                                                                                                                                              | ELLTEFGYKGEETPVIVGSALC[330]ALEGRDPELGLK | 1     |      |      |    |   |        |                                                          |        |
| 3                                                                                                                                                              | KGDEC[339]JELLGHSK                      | 1     |      |      |    |   |        |                                                          |        |
| ELAV2_HUMAN (Q12926) ELAV-like protein 2 (Hu-antigen B) (HuB) (ELAV-like neuronal protein 1) (Nervous system-specific RNA-binding protein Hel-N1) [MASS=39504] | *                                       | 3.06  | *    | *    | *  | 1 | 3      | ILVDQVTGISR                                              | 1      |
| ELF2_HUMAN (Q15723) ETS-related transcription factor Elf-2 (E74-like factor 2) (New ETS-related factor) [MASS=63966]                                           | 0.00                                    | 7.25  | 1.84 | 0.00 | 1  | 2 | 3<br>3 | SETC[330]NEDLAGTTDEK<br>DMPKNIVIDDDKSETC[339]NEDLAGTTDEK | 1<br>1 |
| ENC1_HUMAN (O14682) Ectoderm-neural cortex 1 protein (ENC-1) (p53-induced protein 10) (Nuclear matrix protein NRP/B) [MASS=66129]                              | *                                       | 6.45  | *    | *    | *  | 2 | 2<br>3 | LKLFAFGGTSVSHDKLPK<br>WTMVAPLREGVSNAAVVSAAK              | 1<br>1 |

|                                                                                                                                                                                                                                                                             |      |       |       |      |   |   |   |                                        |    |
|-----------------------------------------------------------------------------------------------------------------------------------------------------------------------------------------------------------------------------------------------------------------------------|------|-------|-------|------|---|---|---|----------------------------------------|----|
| ENOA_HUMAN (P06733) Alpha-enolase (EC 4.2.1.11) (2-phospho-D-glycerate hydro-lyase) (Non-neural enolase) (NNE) (Enolase 1) (Phosphopyruvate hydratase) (C-myc promoter-binding protein) (MBP-1) (MPB-1) (Plasminogen-binding protein) [MASS=47037]                          | 0.00 | 16.63 | *     | *    | * | 5 | 1 | FGANAILGVSLAVC[330]K                   | 1  |
|                                                                                                                                                                                                                                                                             |      |       |       |      |   |   | 3 | LAMQEFM[147]ILPVGAANFREAMR             | 1  |
|                                                                                                                                                                                                                                                                             |      |       |       |      |   |   | 2 | SGETEDTFIADLVVGLC[330]TGQIK            | 2  |
|                                                                                                                                                                                                                                                                             |      |       |       |      |   |   | 3 | SGETEDTFIADLVVGLC[339]TGQIK            | 1  |
|                                                                                                                                                                                                                                                                             |      |       |       |      |   |   | 2 | SGETEDTFIADLVVGLC[339]TGQIK            | 1  |
| ENOG_HUMAN (P09104) Gamma-enolase (EC 4.2.1.11) (2-phospho-D-glycerate hydro-lyase) (Neural enolase) (Neuron-specific enolase) (NSE) (Enolase 2) [MASS=47137]                                                                                                               | 1.00 | 6.70  | 0.67  | 0.23 | 7 | 2 | 2 | TGAPC[330]R                            | 1  |
|                                                                                                                                                                                                                                                                             |      |       |       |      |   |   | 2 | SC[330]NC[330]LLLLK                    | 1  |
|                                                                                                                                                                                                                                                                             |      |       |       |      |   |   | 3 | IVIGM[147]DVAASEFYR                    | 2  |
|                                                                                                                                                                                                                                                                             |      |       |       |      |   |   | 2 | VNQIGSVTEAIQAC[339]K                   | 1  |
|                                                                                                                                                                                                                                                                             |      |       |       |      |   |   | 3 | VSLSGSSDPHLC[339]R                     | 10 |
| ENP2_HUMAN (Q9Y5L3) Ectonucleoside triphosphate diphosphohydrolase 2 (EC 3.6.1.-) (NTPDase2) (Ecto-ATPase) (CD39 antigen-like 1) [MASS=53665]                                                                                                                               | 0.00 | 2.63  | 57.14 | 0.00 | 1 | 1 |   |                                        |    |
| ENPP2_HUMAN (Q13822) Ectonucleotide pyrophosphatase/phosphodiesterase 2 (E-NPP 2) (Phosphodiesterase I/nucleotide pyrophosphatase 2) (Phosphodiesterase I alpha) (PD-Ialpha) (Autotaxin) [Includes: Alkaline phosphodiesterase I (EC 3.1.4.1); Nucleotide pyro [MASS=99003] | 0.41 | 5.79  | 5.35  | 0.00 | 1 | 3 | 3 | SYTSC[339]C[330]HDFDELC[330]LK         | 1  |
|                                                                                                                                                                                                                                                                             |      |       |       |      |   |   | 2 | C[339]FELQEAGPPDC[339]R                | 1  |
|                                                                                                                                                                                                                                                                             |      |       |       |      |   |   | 2 | AAEC[339]PAGFVRPPLIIFSVDGFR            | 1  |
| EOMES_HUMAN (O95936) Eomesodermin homolog [MASS=72612]                                                                                                                                                                                                                      | *    | 8.60  | *     | *    | * | 2 | 3 | VKEEIGSSWIETPPSIKSLDSNDSGVYTSAC[330]K  | 1  |
|                                                                                                                                                                                                                                                                             |      |       |       |      |   |   | 3 | C[339]GDINAEYKDTSKGM[147]GGYYAFYTSP    | 1  |
|                                                                                                                                                                                                                                                                             |      |       |       |      |   |   | 3 | C[339]KPVMIITEYM[147]ENGLDAFLRK        | 1  |
| EPHA4_HUMAN (P54764) Ephrin type-A receptor 4 precursor (EC 2.7.10.1) (Tyrosine-protein kinase receptor SEK) (Receptor protein-tyrosine kinase HEK8) [MASS=109859]                                                                                                          | 0.00 | 8.62  | 0.83  | 0.48 | 2 | 5 | 3 | VIGVGEFGEVC[330]SGR                    | 2  |
|                                                                                                                                                                                                                                                                             |      |       |       |      |   |   | 2 | C[330]PPHSYSVWEGATSC[330]TC[339]DRGFFR | 1  |
|                                                                                                                                                                                                                                                                             |      |       |       |      |   |   | 2 | NPNSLKR                                | 1  |
|                                                                                                                                                                                                                                                                             |      |       |       |      |   |   | 2 | C[330]PPHSYSVWEGATSC[339]TC[339]DR     | 1  |

|                                                                                                                                                                                                                           |      |      |      |      |   |   |   |                                  |   |
|---------------------------------------------------------------------------------------------------------------------------------------------------------------------------------------------------------------------------|------|------|------|------|---|---|---|----------------------------------|---|
| EPHA5_HUMAN (P54756) Ephrin type-A receptor 5 precursor (EC 2.7.10.1) (Tyrosine-protein kinase receptor EHK-1) (EPH homology kinase 1) (Receptor protein-tyrosine kinase HEK7) [MASS=114784]                              | *    | 4.63 | *    | *    | * | 3 | 2 | M[147]HFHNGHIK                   | 1 |
|                                                                                                                                                                                                                           |      |      |      |      |   |   | 2 | KC[339]NSHAGVC[339]EEC[330]GGHVR | 1 |
|                                                                                                                                                                                                                           |      |      |      |      |   |   | 2 | SKETTITAEGLKPASVYVFQIR           | 1 |
| EPHA6_HUMAN (Q9UF33) Ephrin type-A receptor 6 precursor (EC 2.7.10.1) (Tyrosine-protein kinase receptor EHK-2) (EPH homology kinase 2) [MASS=116116]                                                                      | *    | 1.74 | *    | *    | * | 1 | 2 | TYPLNGWDAITEMDEHNR               | 1 |
| EPHA7_HUMAN (Q15375) Ephrin type-A receptor 7 precursor (EC 2.7.10.1) (Tyrosine-protein kinase receptor EHK-3) (EPH homology kinase 3) (Receptor protein-tyrosine kinase HEK11) [MASS=112082]                             | *    | 5.81 | *    | *    | * | 4 | 2 | WTAPEAIQYR                       | 1 |
|                                                                                                                                                                                                                           |      |      |      |      |   |   | 2 | MIRNPNSLKTPLGTC[330]SR           | 1 |
|                                                                                                                                                                                                                           |      |      |      |      |   |   | 3 | C[339]PTHSFSDK                   | 1 |
|                                                                                                                                                                                                                           |      |      |      |      |   |   | 2 | HDGQFTVIQLVGMRLGIAAGM[147]R      | 1 |
| EPM2A_HUMAN (O95278) Laforin (EC 3.1.3.48) (EC 3.1.3.16) (Lafora PTPase) (LAFPTPase) [MASS=37157]                                                                                                                         | *    | 6.34 | *    | *    | * | 1 | 2 | VQYFLMAKRPAVYIDEEALAR            | 1 |
| ERBB3_HUMAN (P21860) Receptor tyrosine-protein kinase erbB-3 precursor (EC 2.7.10.1) (c-erbB3) (Tyrosine kinase-type cell surface receptor HER3) [MASS=148097]                                                            | 0.00 | 4.62 | 0.15 | 0.00 | 1 | 3 | 2 | RESGPGIAPGPEPHGLTNK              | 1 |
|                                                                                                                                                                                                                           |      |      |      |      |   |   | 3 | C[330]WM[147]IDENIRPTFK          | 1 |
|                                                                                                                                                                                                                           |      |      |      |      |   |   | 3 | EITGYLNIQSWPPMHNFVFSNLTTIGGR     | 1 |
| ERO1A_HUMAN (Q96HE7) ERO1-like protein alpha precursor (EC 1.8.4.-) (ERO1-Lalpha) (Oxidoreductin-1-Lalpha) (Endoplasmic oxidoreductin-1-like protein) (ERO1-L) [MASS=54392]                                               | *    | 9.19 | *    | *    | * | 2 | 2 | SFPLHFDENSFFAGDKKEAHK            | 1 |
|                                                                                                                                                                                                                           |      |      |      |      |   |   | 2 | NLYFLYLIELRALSKVLPFFER           | 1 |
| ESCO1_HUMAN (Q5FWF5) N-acetyltransferase ESCO1 (EC 2.3.1.-) (Establishment of cohesion 1 homolog 1) (ECO1 homolog 1) (ESO1 homolog 1) (Establishment factor-like protein 1) (EFO1p) (hEFO1) (CTF7 homolog 1) [MASS=95008] | 0.45 | 6.79 | 1.04 | 0.00 | 1 | 4 | 2 | C[339]NSHLEITIPK                 | 1 |
|                                                                                                                                                                                                                           |      |      |      |      |   |   | 2 | NITC[330]QKEKMK                  | 1 |
|                                                                                                                                                                                                                           |      |      |      |      |   |   | 3 | SSESKINQPELETR                   | 1 |
|                                                                                                                                                                                                                           |      |      |      |      |   |   | 3 | QILHQKETNQDVQC[339]NRFFPSR       | 1 |
| ESPL1_HUMAN (Q14674) Separin (EC 3.4.22.49) (Separase) (Caspase-like protein ESPL1) (Extra spindle poles-like 1 protein) [MASS=233112]                                                                                    | *    | 2.83 | *    | *    | * | 4 | 2 | QC[339]ALFLVLK                   | 1 |
|                                                                                                                                                                                                                           |      |      |      |      |   |   | 3 | LHRC[339]FRLQVESLK               | 1 |
|                                                                                                                                                                                                                           |      |      |      |      |   |   | 2 | GSFSLWK                          | 1 |
|                                                                                                                                                                                                                           |      |      |      |      |   |   | 3 | YTEALLQGWLGGAGPGAPLLYYVNQARQAPR  | 1 |

|                                                                                                                                                                                                                                                 |      |      |      |      |   |   |                                                             |                      |   |
|-------------------------------------------------------------------------------------------------------------------------------------------------------------------------------------------------------------------------------------------------|------|------|------|------|---|---|-------------------------------------------------------------|----------------------|---|
| ETFA_HUMAN (P13804) Electron transfer flavoprotein subunit alpha, mitochondrial precursor (Alpha-ETF) [MASS=35079]                                                                                                                              | 0.00 | 3.00 | 2.65 | 0.00 | 1 | 1 | 2                                                           | C[339]DKVAQDLC[339]K | 1 |
| ETFD_HUMAN (Q16134) Electron transfer flavoprotein-ubiquinone oxidoreductase, mitochondrial precursor (EC 1.5.5.1) (ETF-QO) (ETF-ubiquinone oxidoreductase) (ETF dehydrogenase) (Electron-transferring-flavoprotein dehydrogenase) [MASS=68507] | 0.97 | 3.24 | 2.04 | 0.00 | 1 | 2 | 1 HKGSDFER<br>2 LQINAQNC[339]VHC[339]K                      | 1<br>1               |   |
| ETV7_HUMAN (Q9Y603) Transcription factor ETV7 (Transcription factor Tel-2) (ETS-related protein Tel2) (Tel-related Ets factor) [MASS=38998]                                                                                                     | 0.00 | 6.74 | 1.91 | 0.00 | 1 | 1 | 2 TQGVC[339]SFPAMPQAPIDGRIADC[339]R                         | 1                    |   |
| EXOC2_HUMAN (Q96KP1) Exocyst complex component 2 (Exocyst complex component Sec5) [MASS=104066]                                                                                                                                                 | *    | 4.55 | *    | *    | * | 2 | 2 C[330]VM[147]ATLQHTAEEIKRLAEK<br>2 PSVLGHLSQTASLKRGSFQSGR | 1<br>1               |   |
| EXTL1_HUMAN (Q92935) Exostosin-like 1 (EC 2.4.1.224) (Glucuronosyl-N-acetylglucosaminyl-proteoglycan 4-alpha-N-acetylglucosaminyltransferase) (Exostosin-L) (Multiple exostosis-like protein) [MASS=74696]                                      | *    | 3.85 | *    | *    | * | 2 | 2 WPETAVPLTVIDGHR<br>2 PRPGASQGWPR                          | 1<br>1               |   |
| F10A5_HUMAN (Q8NFI4) Protein FAM10A5 [MASS=41377]                                                                                                                                                                                               | 0.00 | 4.61 | 1.27 | 0.00 | 1 | 1 | 3 LLGHWEEAAHDLAFAC[339]K                                    | 1                    |   |

|                                                                                                                                                                |      |       |      |      |   |   |   |                                                |   |
|----------------------------------------------------------------------------------------------------------------------------------------------------------------|------|-------|------|------|---|---|---|------------------------------------------------|---|
| FA35A_HUMAN (Q86V20) Protein FAM35A<br>[MASS=93704]                                                                                                            | *    | 2.99  | *    | *    | * | 2 |   |                                                |   |
|                                                                                                                                                                |      |       |      |      |   |   | 2 | LSDITSSNMQIC[330]GFK                           | 1 |
| FA38A_HUMAN (Q92508) Protein FAM38A<br>[MASS=233040]                                                                                                           | *    | 4.47  | *    | *    | * | 4 | 2 | GFALYNAANLKSIDFHR                              | 1 |
|                                                                                                                                                                |      |       |      |      |   |   | 3 | RLQGFC[330]LSLAQGTyrPLR                        | 1 |
|                                                                                                                                                                |      |       |      |      |   |   | 3 | FRPMASC[339]LSTVWTC[330]VIIVC[330]KM[147]LYQLK | 1 |
|                                                                                                                                                                |      |       |      |      |   |   | 3 | TVLGKLAfQVALVLAHLWM[147]FFILPAVTER             | 1 |
| FA43B_HUMAN (Q6ZT52) Protein FAM43B<br>[MASS=36776]                                                                                                            | 0.00 | 4.86  | 0.76 | 0.00 | 1 | 1 | 2 | AVVLRC[330]HAVLLARAHK                          | 2 |
| FA47A_HUMAN (Q5JRC9) Protein FAM47A<br>[MASS=89095]                                                                                                            | *    | 1.67  | *    | *    | * | 1 | 3 | LFARRGWTYDSVK                                  | 1 |
| FABPE_HUMAN (Q01469) Fatty acid-binding<br>protein, epidermal (E-FABP) (Psoriasis-<br>associated fatty acid-binding protein homolog)<br>(PA-FABP) [MASS=15033] | 0.00 | 10.45 | 0.38 | 0.00 | 1 | 1 | 2 | LVVEC[330]VM[147]NNVTC[330]TR                  | 1 |



|                                                                                                                                                                                                                                                                              |      |       |      |      |   |   |   |                                     |   |
|------------------------------------------------------------------------------------------------------------------------------------------------------------------------------------------------------------------------------------------------------------------------------|------|-------|------|------|---|---|---|-------------------------------------|---|
| FACD2_HUMAN (Q9BXW9) Fanconi anemia group D2 protein (Protein FACD2) [MASS=166461]                                                                                                                                                                                           | 0.00 | 11.76 | 0.78 | 0.00 | 1 | 8 | 3 | VRQLVMDKLSSIR                       | 1 |
|                                                                                                                                                                                                                                                                              |      |       |      |      |   |   | 3 | QNEASSHIQDDM[147]HLVIRK             | 1 |
|                                                                                                                                                                                                                                                                              |      |       |      |      |   |   | 3 | GRASSSGNQESSGQSC[330]IILLFDVIKSAIR  | 1 |
|                                                                                                                                                                                                                                                                              |      |       |      |      |   |   | 3 | ELSDLLIENTSLTVPILDVLSLRL            | 1 |
|                                                                                                                                                                                                                                                                              |      |       |      |      |   |   | 3 | LESM[147]SAKERSFMC[339]SLIFLTLNWFR  | 1 |
|                                                                                                                                                                                                                                                                              |      |       |      |      |   |   | 3 | TLELLVC[330]RVKAM[147]LTLNNC[339]R  | 1 |
|                                                                                                                                                                                                                                                                              |      |       |      |      |   |   | 3 | LPEYFFENKNSDEINIPRLIVSQLK           | 1 |
|                                                                                                                                                                                                                                                                              |      |       |      |      |   |   | 3 | EIVNAFC[330]QETSPEM[147]KGKVLTR     | 1 |
| FAK2_HUMAN (Q14289) Protein tyrosine kinase 2 beta (EC 2.7.10.2) (Focal adhesion kinase 2) (FADK 2) (Proline-rich tyrosine kinase 2) (Cell adhesion kinase beta) (CAK beta) (Calcium-dependent tyrosine kinase) (CADTK) (Related adhesion focal tyrosine kinas [MASS=115874] | *    | 1.78  | *    | *    | * | 1 | 3 | VC[339]FYNSNFNPGKNFKLVK             | 1 |
|                                                                                                                                                                                                                                                                              |      |       |      |      |   |   |   |                                     |   |
| FAM5C_HUMAN (Q76B58) Protein FAM5C precursor (DBCCR1-like protein 1) [MASS=88445]                                                                                                                                                                                            | *    | 10.05 | *    | *    | * | 4 | 2 | C[339]GTC[330]NTGYMLSQGLC[330]K     | 1 |
|                                                                                                                                                                                                                                                                              |      |       |      |      |   |   | 2 | RYEQLNSMKQLFLK                      | 1 |
|                                                                                                                                                                                                                                                                              |      |       |      |      |   |   | 3 | TKLDLPLQC[330]YNWTLTLGNKWK          | 1 |
|                                                                                                                                                                                                                                                                              |      |       |      |      |   |   | 3 | IQSALQAFNAKLPNTM[147]DYDTTKLC[330]S | 1 |
| FANCC_HUMAN (Q00597) Fanconi anemia group C protein (Protein FACC) [MASS=63428]                                                                                                                                                                                              | 0.23 | 3.76  | 0.44 | 0.00 | 1 | 2 | 1 | LGIESPR                             | 2 |
|                                                                                                                                                                                                                                                                              |      |       |      |      |   |   | 2 | ISLPMSAVVC[330]LWLR                 | 1 |
| FANCM_HUMAN (Q8IYD8) Fanconi anemia group M protein (EC 3.6.1.-) (ATP-dependent RNA helicase FANCM) (Protein FACM) (Fanconi anemia-associated polypeptide of 250 kDa) (FAAP250) (Protein Hef ortholog) [MASS=232190]                                                         | 0.00 | 1.76  | 1.42 | 0.00 | 1 | 3 | 1 | GM[147]TRSK                         | 1 |
|                                                                                                                                                                                                                                                                              |      |       |      |      |   |   | 1 | VSKEIK                              | 2 |
|                                                                                                                                                                                                                                                                              |      |       |      |      |   |   | 3 | SC[339]HSVEDGQLLTSNESEDDEIFRR       | 1 |
| FARP1_HUMAN (Q9Y4F1) FERM, RhoGEF and pleckstrin domain-containing protein 1 (Chondrocyte-derived ezrin-like protein) [MASS=118632]                                                                                                                                          | *    | 2.78  | *    | *    | * | 1 | 3 | PPPTPSGKLVSIQMLDDTQEAFVPPQR         | 1 |
| FASTK_HUMAN (Q14296) Fas-activated serine/threonine kinase (EC 2.7.11.8) (FAST kinase) [MASS=61104]                                                                                                                                                                          | 0.00 | 6.92  | 0.86 | 0.00 | 1 | 2 | 2 | ERWHFC[330]R                        | 1 |
|                                                                                                                                                                                                                                                                              |      |       |      |      |   |   | 2 | HLGLMGYQLLPLPFEELESQRGLPQLKSYLR     | 1 |

|                                                                                                                                                                                                                                                                              |      |      |      |      |   |   |   |                                               |   |
|------------------------------------------------------------------------------------------------------------------------------------------------------------------------------------------------------------------------------------------------------------------------------|------|------|------|------|---|---|---|-----------------------------------------------|---|
| FAS_HUMAN (P49327) Fatty acid synthase (EC 2.3.1.85) [Includes: [Acyl-carrier-protein] S-acetyltransferase (EC 2.3.1.38); [Acyl-carrier-protein] S-malonyltransferase (EC 2.3.1.39); 3-oxoacyl-[acyl-carrier-protein] synthase (EC 2.3.1.41); 3-oxoacyl-[acyl- [MASS=273398] | 0.00 | 1.63 | 0.10 | 0.00 | 1 | 2 | 3 | LQELSSKADEASELAC[330]PTPK                     | 1 |
|                                                                                                                                                                                                                                                                              |      |      |      |      |   |   | 3 | LLEASRAFEVSENGNLVVS GK                        | 1 |
| FBLN2_HUMAN (P98095) Fibulin-2 precursor [MASS=126543]                                                                                                                                                                                                                       | *    | 0.51 | *    | *    | * | 1 | 1 | AVLEPR                                        | 1 |
|                                                                                                                                                                                                                                                                              |      |      |      |      |   |   | 2 | AWGHPC[339]EM[147]C[339]PAQPHPC[339]R         | 1 |
|                                                                                                                                                                                                                                                                              |      |      |      |      |   |   | 2 | TLPGGNQC[330]IVPIC[330]R                      | 1 |
| FBN1_HUMAN (P35555) Fibrillin-1 precursor [MASS=312312]                                                                                                                                                                                                                      | 0.00 | 3.41 | *    | *    | * | 5 | 3 | AWGHPC[330]EM[147]C[330]PAQPHPC[339]RRGFIPNIR | 1 |
|                                                                                                                                                                                                                                                                              |      |      |      |      |   |   | 2 | GPGFATKEITNGKPFFK                             | 1 |
|                                                                                                                                                                                                                                                                              |      |      |      |      |   |   | 3 | EGYC[339]FTEVLQNM C[339]QIGSSNRNPVTK          | 1 |
|                                                                                                                                                                                                                                                                              |      |      |      |      |   |   | 2 | PFYKDINEC[339]K                               | 1 |
|                                                                                                                                                                                                                                                                              |      |      |      |      |   |   | 3 | GYVLQEDGKTC[330]K                             | 1 |
| FBN2_HUMAN (P35556) Fibrillin-2 precursor [MASS=314347]                                                                                                                                                                                                                      | 0.00 | 2.68 | 0.49 | 0.00 | 1 | 5 | 3 | GGTC[339]VNTEGSFQC[330]DC[339]PLGHELSPSR      | 1 |
|                                                                                                                                                                                                                                                                              |      |      |      |      |   |   | 2 | PDGEGC[330]VDENEC[339]RTKPGIC[339]ENGR        | 1 |
|                                                                                                                                                                                                                                                                              |      |      |      |      |   |   | 2 | C[339]EC[330]NM[147]GYK                       | 1 |
|                                                                                                                                                                                                                                                                              |      |      |      |      |   |   | 3 | C[330]TC[330]RQGFAGDGFFC[330]EDR              | 1 |
| FBN3_HUMAN (Q75N90) Fibrillin-3 precursor [MASS=300370]                                                                                                                                                                                                                      | *    | 3.13 | *    | *    | * | 4 | 2 | GIPSLGPGNSNIGTATLNQTIDIC[330]R                | 1 |
|                                                                                                                                                                                                                                                                              |      |      |      |      |   |   | 2 | KSVC[339]FRHYNGTC[330]QNELAFNVTR              | 1 |
|                                                                                                                                                                                                                                                                              |      |      |      |      |   |   | 3 | GPC[330]SYSC[330]ANTPGGFLC[330]GC[339]PQGYFR  | 1 |
| FBX31_HUMAN (Q5XUX0) F-box only protein 31 [MASS=60647]                                                                                                                                                                                                                      | *    | 3.34 | *    | *    | * | 1 | 3 | IHLMERKAATVEC[339]M[147]YGHK                  | 1 |
| FBX40_HUMAN (Q9UH90) F-box only protein 40 (Muscle disease-related protein) [MASS=79663]                                                                                                                                                                                     | *    | 4.65 | *    | *    | * | 2 | 2 | VPVSYC[339]GK                                 | 1 |
|                                                                                                                                                                                                                                                                              |      |      |      |      |   |   | 3 | DYNMYLVHNGRMLIHFGQM[147]PAC[339]TPK           | 1 |
| FBX46_HUMAN (Q6PJ61) F-box only protein 46 (F-box only protein 34-like) [MASS=69030]                                                                                                                                                                                         | *    | 2.01 | *    | *    | * | 1 | 2 | PGPGPGEVRIAFR                                 | 1 |
| FBXL4_HUMAN (Q9UKA2) F-box/LRR-repeat protein 4 (F-box and leucine-rich repeat protein 4) (F-box protein FBL4/FBL5) [MASS=70096]                                                                                                                                             | *    | 6.28 | *    | *    | * | 2 | 2 | PC[330]IKQINFPTNLIR                           | 1 |
|                                                                                                                                                                                                                                                                              |      |      |      |      |   |   | 2 | C[339]TLVQWLNLSWTGNRGFISVAGFSR                | 1 |
| FBXL6_HUMAN (Q8N531) F-box/LRR-repeat protein 6 (F-box and leucine-rich repeat protein 6) (F-box protein FBL6) (FBL6A) [MASS=58588]                                                                                                                                          | *    | 5.75 | *    | *    | * | 1 | 3 | IPLEILVQIFGLLVAADGPM[147]PFLGRAARVC[330]R     | 1 |

|                                                                                                                                                                                                                                           |      |       |      |      |   |   |                                                                                                                                                                                                                                                                         |                                      |   |
|-------------------------------------------------------------------------------------------------------------------------------------------------------------------------------------------------------------------------------------------|------|-------|------|------|---|---|-------------------------------------------------------------------------------------------------------------------------------------------------------------------------------------------------------------------------------------------------------------------------|--------------------------------------|---|
| FGD1_HUMAN (P98174) FYVE, RhoGEF and PH domain-containing protein 1 (Faciogenital dysplasia 1 protein) (Zinc finger FYVE domain-containing protein 3) (Rho/Rac guanine nucleotide exchange factor FGD1) (Rho/Rac GEF) [MASS=106560]       | *    | 1.98  | *    | *    | * | 1 | 2                                                                                                                                                                                                                                                                       | SDPGPPTETPSQRPSPLKR                  | 1 |
| FGD5_HUMAN (Q6ZNL6) FYVE, RhoGEF and PH domain-containing protein 5 (Zinc finger FYVE domain-containing protein 23) [MASS=159906]                                                                                                         | 0.00 | 5.54  | 4.71 | 0.00 | 1 | 4 | 2 C[339]SESETDEDYIVVPR<br>2 GRAVPGLM[147]RER<br>2 VTDRANDSMEQGENLQK<br>3 PHSGKVAGYVPETVPEETGPEAGSSAPGIGGAAEEVGK                                                                                                                                                         | 1<br>1<br>1<br>1                     |   |
| FGF6_HUMAN (P10767) Fibroblast growth factor 6 precursor (FGF-6) (HBGF-6) (HST-2) [MASS=22904]                                                                                                                                            | 0.00 | 19.23 | 0.69 | 0.00 | 1 | 2 | 2 QRRLYC[330]NVGIGFHLQVLPDGR<br>2 RLYC[339]NVGIGFHLQVLPDGR                                                                                                                                                                                                              | 1<br>1                               |   |
| FGFR3_HUMAN (P22607) Fibroblast growth factor receptor 3 precursor (EC 2.7.10.1) (FGFR-3) (CD333 antigen) [MASS=87709]                                                                                                                    | *    | 1.49  | *    | *    | * | 1 | 2 WELSRARLTLGK                                                                                                                                                                                                                                                          | 1                                    |   |
| FILA_HUMAN (P20930) Filaggrin [MASS=435166]                                                                                                                                                                                               | 0.00 | 1.21  | 0.28 | 0.00 | 1 | 3 | 2 DPGLC[330]GHSSDISKQLGFSQSQR<br>2 RQDSSVVGDSGSR<br>2 HSGIGHRQASSAVR<br>2 RAPSVANVGSHC[330]DLSLK<br>3 ARGPGLEKTGVAVNK<br>3 YGGDEIPFSPYRVRVPTGDASK<br>2 KDGSC[339]GVAYVVQEPGDYEVSVK<br>2 DAGEGLLAVQITDPEGKPK<br>2 ATC[339]APQHGAPGPGPADASKVVAK<br>2 IQQNTFTRWC[330]NEHLK | 1<br>1<br>1<br>1<br>1<br>1<br>1<br>1 |   |
| FLNA_HUMAN (P21333) Filamin-A (Alpha-filamin) (Filamin-1) (Endothelial actin-binding protein) (Actin-binding protein 280) (ABP-280) (Nonmuscle filamin) [MASS=280628]                                                                     | 0.00 | 5.06  | 0.44 | 0.00 | 1 | 7 | 2 DAGEGLLAVQITDPEGKPKR<br>3 VTEAEIVPMGKNSHC[339]VRFVPQEM[147]GVHTVSVK                                                                                                                                                                                                   | 1<br>1                               |   |
| FLNB_HUMAN (O75369) Filamin-B (FLN-B) (Beta-filamin) (Actin-binding-like protein) (Thyroid autoantigen) (Truncated actin-binding protein) (Truncated ABP) (ABP-280 homolog) (ABP-278) (Filamin 3) (Filamin homolog 1) (Fh1) [MASS=278193] | *    | 1.96  | *    | *    | * | 2 | 3 DAGEGLLAVQITDPEGKPKR<br>3 VTEAEIVPMGKNSHC[339]VRFVPQEM[147]GVHTVSVK                                                                                                                                                                                                   | 1<br>1                               |   |
| FMNL_HUMAN (O95466) Formin-like 1 protein (Formin-like protein) (Leukocyte formin) (CLL-associated antigen KW-13) [MASS=121827]                                                                                                           | *    | 3.91  | *    | *    | * | 2 | 2 NPPAAYIQKLSYVDTGGVSR<br>2 GAAYGFRQLSLDALLEM[147]KSTDR                                                                                                                                                                                                                 | 1<br>1                               |   |

|                                                                                                                                                                                                                           |      |       |      |      |   |   |   |                                                     |   |
|---------------------------------------------------------------------------------------------------------------------------------------------------------------------------------------------------------------------------|------|-------|------|------|---|---|---|-----------------------------------------------------|---|
| FOG1_HUMAN (Q8IX07) Zinc finger protein ZFPM1 (Zinc finger protein multitype 1) (Friend of GATA protein 1) (Friend of GATA-1) (FOG-1) [MASS=104546]                                                                       | *    | 2.49  | *    | *    | * | 1 | 2 | TPADRGPSPAPAPAASPQPGSRGPR                           | 1 |
| FOXE1_HUMAN (O00358) Forkhead box protein E1 (Thyroid transcription factor 2) (TTF-2) (Forkhead-related protein FKHL15) [MASS=38289]                                                                                      | 0.00 | 16.49 | *    | *    | * | 3 | 2 | LAGPASPPAGGSSGGVETTVDFYGR                           | 1 |
|                                                                                                                                                                                                                           |      |       |      |      |   |   | 3 | GETAAGAGVPGEATGRGAGGR                               | 1 |
|                                                                                                                                                                                                                           |      |       |      |      |   |   | 2 | HAAAYPGGIDRFVSAM[147]                               | 1 |
| FOXL1_HUMAN (Q12952) Forkhead box protein L1 (Forkhead-related protein FKHL11) (Forkhead-related transcription factor 7) (FREAC-7) [MASS=36490]                                                                           | 0.00 | 3.48  | 1.08 | 0.00 | 1 | 1 | 2 | C[339]LDMFENGNYRR                                   | 1 |
| FOXN2_HUMAN (P32314) Human T-cell leukemia virus enhancer factor (Forkhead box protein N2) [MASS=37734]                                                                                                                   | 0.00 | 9.38  | 0.51 | 0.00 | 1 | 1 | 3 | LQESDSLATSIDPKEDHNYSSASSM[147]AAQRC[330]ASR         | 1 |
| FRAP_HUMAN (P42345) FKBP12-rapamycin complex-associated protein (FK506-binding protein 12-rapamycin complex-associated protein 1) (Rapamycin target protein) (RAPT1) (Mammalian target of rapamycin) (mTOR) [MASS=288890] | *    | 3.53  | *    | *    | * | 5 | 2 | KILLNIEHR                                           | 1 |
|                                                                                                                                                                                                                           |      |       |      |      |   |   | 3 | C[339]FLKLGEWQLNLQGINESTIPK                         | 1 |
|                                                                                                                                                                                                                           |      |       |      |      |   |   | 2 | M[147]DTNKDDPELMLGRMR                               | 1 |
|                                                                                                                                                                                                                           |      |       |      |      |   |   | 2 | KLTLMGSGNGHEFVLLK                                   | 1 |
|                                                                                                                                                                                                                           |      |       |      |      |   |   | 3 | AYGAMVSC[339]HM[147]LSELEEVIQYKLVPER                | 1 |
| FREM1_HUMAN (Q5H8C1) FRAS1-related extracellular matrix protein 1 precursor (Protein QBRICK) [MASS=244122]                                                                                                                | *    | 2.43  | *    | *    | * | 4 | 2 | MASLEC[330]TVSLDTARTR                               | 1 |
|                                                                                                                                                                                                                           |      |       |      |      |   |   | 3 | ILKTISVEVIPVNDEK                                    | 1 |
|                                                                                                                                                                                                                           |      |       |      |      |   |   | 2 | YVHNGC[330]PILDEDTVK                                | 1 |
|                                                                                                                                                                                                                           |      |       |      |      |   |   | 1 | PM[147]LSKK                                         | 1 |
| FSCN1_HUMAN (Q16658) Fascin (Singed-like protein) (55 kDa actin-bundling protein) (p55) [MASS=54398]                                                                                                                      | 1.00 | 2.85  | 0.81 | 0.03 | 2 | 1 | 2 | YLAADKDGNVTC[330]JER                                | 1 |
|                                                                                                                                                                                                                           |      |       |      |      |   |   | 2 | YLAADKDGNVTC[339]JER                                | 1 |
| FTHFD_HUMAN (O75891) 10-formyltetrahydrofolate dehydrogenase (EC 1.5.1.6) (10-FTHFDH) (Aldehyde dehydrogenase 1 family member L1) [MASS=98829]                                                                            | *    | 2.11  | *    | *    | * | 1 | 2 | THVGMSIQTFRYFAGWC[339]DK                            | 1 |
| FUK_HUMAN (Q8N0W3) L-fucose kinase (EC 2.7.1.52) (Fucokinase) [MASS=117622]                                                                                                                                               | *    | 9.23  | *    | *    | * | 4 | 2 | ALAC[339]VADVLCG[330]M[147]AEGRGGLRSGPAANPEWM[147]R | 1 |
|                                                                                                                                                                                                                           |      |       |      |      |   |   | 2 | IPEPELWLAVGPRQDEM[147]TVKIVC[339]R                  | 1 |
|                                                                                                                                                                                                                           |      |       |      |      |   |   | 2 | IVC[330]RC[339]LADLRDYC[339]QPHAPGALLK              | 1 |
|                                                                                                                                                                                                                           |      |       |      |      |   |   | 2 | ELGPQDLLWMLDHQEDGGEALR                              | 1 |

|                                                                                                                                                                                                                                                                             |      |       |      |      |   |   |                  |                                                                                                          |                  |
|-----------------------------------------------------------------------------------------------------------------------------------------------------------------------------------------------------------------------------------------------------------------------------|------|-------|------|------|---|---|------------------|----------------------------------------------------------------------------------------------------------|------------------|
| FVT1_HUMAN (Q06136) 3-ketodihydrospingosine reductase precursor (EC 1.1.1.102) (3-dehydrospinganine reductase) (KDS reductase) (Follicular variant translocation protein 1) (FVT-1) [MASS=36187]                                                                            | 0.00 | 5.42  | 0.70 | 0.00 | 1 | 1 | 2                | LGPVDM[147]LVNC[330]AGMAVSGK                                                                             | 1                |
| FZD3_HUMAN (Q9NPG1) Frizzled-3 precursor (Fz-3) (hFz3) [MASS=76262]                                                                                                                                                                                                         | 0.48 | 5.41  | 0.98 | 0.32 | 2 | 2 | 2<br>2           | LM[147]EM[147]FGVPWPEDM[147]EC[339]SR<br>DFRPFLC[330]ALYAPIC[330]M[147]EYGR                              | 1<br>1           |
| FZD4_HUMAN (Q9ULV1) Frizzled-4 precursor (Fz-4) (hFz4) (FzE4) [MASS=59881]                                                                                                                                                                                                  | *    | 6.15  | *    | *    | * | 1 | 3                | YSADDSNM[147]AVEM[147]LKIFMSLLVGITSGM[147]WIWSAK                                                         | 1                |
| G3PT_HUMAN (O14556) Glyceraldehyde-3-phosphate dehydrogenase, testis-specific (EC 1.2.1.12) (Spermatogenic cell-specific glyceraldehyde 3-phosphate dehydrogenase 2) (GAPDH-2) [MASS=44501]                                                                                 | 0.00 | 16.42 | 6.00 | 0.00 | 1 | 3 | 2<br>3<br>3      | LAQPAPYSAIK<br>AC[339]M[147]EKGVKVAVNDPFIDPEYVMVYMFK<br>VPTPDVSVVDLTC[339]RLAQPAPYSAIKEAVK               | 1<br>1<br>1      |
| G3P_HUMAN (P04406) Glyceraldehyde-3-phosphate dehydrogenase (EC 1.2.1.12) (GAPDH) [MASS=35922]                                                                                                                                                                              | 1.00 | 9.28  | 0.60 | 0.10 | 6 | 2 | 2<br>2<br>2      | VPTANVSVVDLTC[330]R<br>IISNASC[330]TTNC[330]LAPLAK<br>VPTANVSVVDLTC[339]R<br>IISNASC[339]TTNC[339]LAPLAK | 2<br>2<br>1<br>1 |
| G6PI_HUMAN (P06744) Glucose-6-phosphate isomerase (EC 5.3.1.9) (GPI) (Phosphoglucose isomerase) (PGI) (Phosphohexose isomerase) (PHI) (Neuroleukin) (NLK) (Sperm antigen 36) (SA-36) [MASS=63015]                                                                           | 0.95 | 9.52  | 0.80 | 0.00 | 1 | 3 | 2<br>3<br>2      | PYSSGGPRVWYVSNIIDGTHIAK<br>ELQAAGKSPEDLER<br>M[147]IPC[330]DFLIPVQTQHPIR                                 | 1<br>1<br>1      |
| GABR1_HUMAN (Q9UBS5) Gamma-aminobutyric acid type B receptor, subunit 1 precursor (GABA-B receptor 1) (GABA-B-R1) (Gb1) [MASS=108320]                                                                                                                                       | *    | 2.50  | *    | *    | * | 1 | 3                | KIATIQQTTEVFTSTLDDLEERVK                                                                                 | 1                |
| GABT_HUMAN (P80404) 4-aminobutyrate aminotransferase, mitochondrial precursor (EC 2.6.1.19) ((S)-3-amino-2-methylpropionate transaminase) (EC 2.6.1.22) (Gamma-amino-N-butyrate transaminase) (GABA transaminase) (GABA aminotransferase) (GABA-AT) (GABA-T) ( [MASS=56439] | 1.00 | 8.20  | 1.03 | 0.26 | 3 | 3 | 2<br>2<br>2<br>2 | TM[147]GC[330]LATTHSK<br>C[339]LEEVEDLIVK<br>TM[147]GC[339]LATTHSK<br>HGC[339]AFLVDEVQTTGGGC[339]TGK     | 1<br>1<br>1<br>1 |

|                                                                                                                                                        |      |       |      |      |    |   |  |   |                                            |   |
|--------------------------------------------------------------------------------------------------------------------------------------------------------|------|-------|------|------|----|---|--|---|--------------------------------------------|---|
|                                                                                                                                                        |      |       |      |      |    |   |  | 2 | LFVSGAC[330]DASAK                          | 2 |
|                                                                                                                                                        |      |       |      |      |    |   |  | 2 | ELAGHTGYLSC[330]C[339]R                    | 1 |
|                                                                                                                                                        |      |       |      |      |    |   |  | 3 | QTFTGHESDINAIC[330]FFPNGNAFATGSDDATC[330]R | 2 |
|                                                                                                                                                        |      |       |      |      |    |   |  | 2 | ADQELMTYSHDNIIC[330]GITSVSFSK              | 1 |
|                                                                                                                                                        |      |       |      |      |    |   |  | 3 | QTFTGHESDINAIC[339]FFPNGNAFATGSDDATC[339]R | 1 |
| GBB1_HUMAN (P62873) Guanine nucleotide-binding protein G(I)/G(S)/G(T) subunit beta 1 (Transducin beta chain 1) [MASS=37246]                            | 1.00 | 29.79 | 0.56 | 0.19 | 13 | 5 |  | 1 | LFVSGAC[330]DASAK                          | 1 |
|                                                                                                                                                        |      |       |      |      |    |   |  | 2 | LFVSGAC[339]DASAK                          | 1 |
|                                                                                                                                                        |      |       |      |      |    |   |  | 2 | KAC[330]ADATLSQITNNIDPVGR                  | 1 |
|                                                                                                                                                        |      |       |      |      |    |   |  | 2 | ELAGHTGYLSC[339]C[339]R                    | 1 |
|                                                                                                                                                        |      |       |      |      |    |   |  | 2 | ELAGHTGYLSC[330]C[330]R                    | 4 |
|                                                                                                                                                        |      |       |      |      |    |   |  | 3 | QTFIGHESDINAVAFFPNGYAFTTGSDATC[330]R       | 1 |
| GBB2_HUMAN (P62879) Guanine nucleotide-binding protein G(I)/G(S)/G(T) subunit beta 2 (Transducin beta chain 2) (G protein beta 2 subunit) [MASS=37200] | 1.00 | 24.78 | 0.58 | 0.12 | 6  | 4 |  | 2 | ELPGHTGYLSC[339]C[339]R                    | 1 |
|                                                                                                                                                        |      |       |      |      |    |   |  | 2 | KAC[330]GDSTLTQITAGLDPVGR                  | 1 |
|                                                                                                                                                        |      |       |      |      |    |   |  | 2 | AC[330]GDSTLTQITAGLDPVGR                   | 1 |
|                                                                                                                                                        |      |       |      |      |    |   |  | 2 | ELPGHTGYLSC[330]C[330]R                    | 2 |
|                                                                                                                                                        |      |       |      |      |    |   |  | 2 | VSC[330]LGVTADGM[147]AVATGSWDSFLK          | 1 |
| GBB3_HUMAN (P16520) Guanine nucleotide-binding protein G(I)/G(S)/G(T) subunit beta 3 (Transducin beta chain 3) [MASS=37221]                            | 0.56 | 10.59 | 0.65 | 0.00 | 1  | 2 |  | 2 | ELSAHTGYLSC[330]C[330]R                    | 1 |
| GBB4_HUMAN (Q9HAV0) Guanine nucleotide-binding protein subunit beta 4 (Transducin beta chain 4) [MASS=37436]                                           | 0.00 | 7.96  | *    | *    | *  | 1 |  | 3 | NQIQDARKAC[330]NDATLVQITSNMDSVGR           | 1 |
| GBG12_HUMAN (Q9UBI6) Guanine nucleotide-binding protein G(I)/G(S)/G(O) gamma-12 subunit precursor [MASS=7875]                                          | 0.99 | 19.72 | 0.73 | 0.00 | 1  | 1 |  | 2 | ASADLM[147]SYC[330]EEHAR                   | 1 |
|                                                                                                                                                        |      |       |      |      |    |   |  | 2 | AAADLMAYC[330]EAHAK                        | 1 |
| GBG2_HUMAN (P59768) Guanine nucleotide-binding protein G(I)/G(S)/G(O) gamma-2 subunit precursor (G gamma-I) [MASS=7719]                                | 1.00 | 62.86 | 0.61 | 0.15 | 5  | 2 |  | 2 | AAADLM[147]AYC[339]EAHAK                   | 1 |
|                                                                                                                                                        |      |       |      |      |    |   |  | 3 | AAADLM[147]AYC[330]EAHAKEDPLLTPVPAENPFR    | 2 |
|                                                                                                                                                        |      |       |      |      |    |   |  | 2 | AAADLM[147]AYC[330]EAHAK                   | 1 |
| GBG3_HUMAN (P63215) Guanine nucleotide-binding protein G(I)/G(S)/G(O) gamma-3 subunit precursor [MASS=8305]                                            | 0.00 | 40.00 | 1.09 | 0.00 | 1  | 1 |  | 3 | AAADLMTYC[339]DAHAC[339]EDPLITPVPTSENPFRR  | 1 |

|                                                                                                                                                                         |      |       |      |      |   |   |   |                                             |   |
|-------------------------------------------------------------------------------------------------------------------------------------------------------------------------|------|-------|------|------|---|---|---|---------------------------------------------|---|
| GBG7_HUMAN (O60262) Guanine nucleotide-binding protein G(I)/G(S)/G(O) gamma-7 subunit precursor [MASS=7522]                                                             | 1.00 | 20.59 | 0.72 | 0.13 | 2 | 1 | 2 | AASDLMSYC[330]EQHAR                         | 1 |
|                                                                                                                                                                         |      |       |      |      |   |   | 2 | AASDLM[147]SYC[330]EQHAR                    | 1 |
| GDIA_HUMAN (P31150) Rab GDP dissociation inhibitor alpha (Rab GDI alpha) (Guanosine diphosphate dissociation inhibitor 1) (GDI-1) (XAP-4) (Oligophrenin-2) [MASS=50582] | 1.00 | 5.59  | 0.96 | 0.15 | 2 | 2 | 2 | IIC[330]ILSHPIK                             | 1 |
|                                                                                                                                                                         |      |       |      |      |   |   | 2 | TDDYLDQPC[339]LETVNR                        | 1 |
| GDIB_HUMAN (P50395) Rab GDP dissociation inhibitor beta (Rab GDI beta) (Guanosine diphosphate dissociation inhibitor 2) (GDI-2) [MASS=50663]                            | *    | 6.07  | *    | *    | * | 2 | 2 | RMTGSEFDFEEM[147]K                          | 1 |
|                                                                                                                                                                         |      |       |      |      |   |   | 2 | YLDFKVTEGSFVYK                              | 1 |
| GDS1_HUMAN (P52306) Rap1 GTPase-GDP dissociation stimulator 1 (SMG P21 stimulatory GDP/GTP exchange protein) (SMG GDS protein) (Exchange factor smgGDS) [MASS=66403]    | 0.71 | 9.23  | 0.56 | 0.00 | 1 | 2 | 2 | QIEHDKREM[147]IFEVLAPLAENDAIAK              | 1 |
|                                                                                                                                                                         |      |       |      |      |   |   | 3 | ITAVDKTEDSLEGC[330]LDC[330]LLQALAQNNNTETSEK | 1 |
| GFRA3_HUMAN (O60609) GDNF family receptor alpha-3 precursor (GFR-alpha-3) [MASS=44511]                                                                                  | *    | 2.00  | *    | *    | * | 1 | 2 | M[147]VRPLNPR                               | 1 |
|                                                                                                                                                                         |      |       |      |      |   |   | 2 | LINGGIAGLIGVTC[339]VFPIDLAK                 | 1 |
| GHC1_HUMAN (Q9H936) Mitochondrial glutamate carrier 1 (GC-1) (Glutamate/H(+) symporter 1) (Solute carrier family 25 member 22) [MASS=34470]                             | 1.00 | 22.91 | 0.83 | 0.11 | 7 | 5 | 2 | PTATQLTRDLLR                                | 1 |
|                                                                                                                                                                         |      |       |      |      |   |   | 3 | IQLQDAGRIAAQRK                              | 1 |
|                                                                                                                                                                         |      |       |      |      |   |   | 2 | VYTSM[147]SDC[339]LIK                       | 1 |
|                                                                                                                                                                         |      |       |      |      |   |   | 1 | GVNEDTYSGILDC[339]AR                        | 1 |
|                                                                                                                                                                         |      |       |      |      |   |   | 2 | GVNEDTYSGILDC[330]AR                        | 2 |
|                                                                                                                                                                         |      |       |      |      |   |   | 2 | LINGGIAGLIGVTC[330]VFPIDLAK                 | 2 |
| GLIS3_HUMAN (Q8NEA6) Zinc finger protein GLIS3 (GLI-similar 3) (Zinc finger protein 515) [MASS=83605]                                                                   | *    | 2.84  | *    | *    | * | 1 | 2 | KRALSLSPKSDGIGIDFNTIIR                      | 1 |
|                                                                                                                                                                         |      |       |      |      |   |   |   |                                             |   |
| GLRX1_HUMAN (P35754) Glutaredoxin-1 (Thioltransferase-1) (TTase-1) [MASS=11644]                                                                                         | *    | 12.38 | *    | *    | * | 1 | 3 | AQEFVNC[339]KIQPGK                          | 1 |

|                                                                                                                                                                                                                                                                              |      |       |      |      |   |   |  |   |                                        |   |
|------------------------------------------------------------------------------------------------------------------------------------------------------------------------------------------------------------------------------------------------------------------------------|------|-------|------|------|---|---|--|---|----------------------------------------|---|
|                                                                                                                                                                                                                                                                              |      |       |      |      |   |   |  | 3 | FDYVM[147]QFLNKMAGNEYVGFSNATFQSERESGDR | 1 |
|                                                                                                                                                                                                                                                                              |      |       |      |      |   |   |  | 2 | C[339]VQSNIVLLTQAFR                    | 3 |
| GLSK_HUMAN (O94925) Glutaminase kidney isoform, mitochondrial precursor (EC 3.5.1.2) (GLS) (L-glutamine amidohydrolase) (K-glutaminase) [MASS=73461]                                                                                                                         | 1.00 | 13.75 | 1.36 | 0.04 | 7 | 5 |  | 2 | LKEC[330]M[147]DM[147]LR               | 1 |
|                                                                                                                                                                                                                                                                              |      |       |      |      |   |   |  | 2 | LKEC[339]M[147]DM[147]LR               | 1 |
|                                                                                                                                                                                                                                                                              |      |       |      |      |   |   |  | 2 | LKEC[339]M[147]DMLR                    | 1 |
|                                                                                                                                                                                                                                                                              |      |       |      |      |   |   |  | 2 | C[330]VQSNIVLLTQAFR                    | 1 |
|                                                                                                                                                                                                                                                                              |      |       |      |      |   |   |  | 2 | VPFC[330]LQSC[330]VKPLK                | 1 |
|                                                                                                                                                                                                                                                                              |      |       |      |      |   |   |  | 3 | IKQGLLPSLEDLLFYTIAEGQEK                | 1 |
|                                                                                                                                                                                                                                                                              |      |       |      |      |   |   |  | 2 | VPFC[339]LQSC[339]VKPLK                | 1 |
| GLSL_HUMAN (Q9UI32) Glutaminase liver isoform, mitochondrial precursor (EC 3.5.1.2) (GLS) (L-glutamine amidohydrolase) (L-glutaminase) [MASS=66309]                                                                                                                          | *    | 5.48  | *    | *    | * | 2 |  | 2 | KC[330]VSSSIVLLTQAFR                   | 1 |
|                                                                                                                                                                                                                                                                              |      |       |      |      |   |   |  | 2 | MAGNEYMGFSNATFQSEK                     | 1 |
| GLT14_HUMAN (Q96FL9) Polypeptide N-acetylgalactosaminyltransferase 14 (EC 2.4.1.41) (Protein-UDP acetylgalactosaminyltransferase 14) (UDP-GalNAc:polypeptide N-acetylgalactosaminyltransferase 14) (Polypeptide GalNAc transferase 14) (GalNAc-T14) (pp-GaNTas) [MASS=64320] | *    | 7.79  | *    | *    | * | 2 |  | 3 | VWM[147]C[339]GGSLEIVPC[330]SRVGHVFR   | 1 |
|                                                                                                                                                                                                                                                                              |      |       |      |      |   |   |  | 2 | RLDPTPIRTPIIAGGLFVIDK                  | 1 |
| GNAI1_HUMAN (P63096) Guanine nucleotide-binding protein G(i), alpha-1 subunit (Adenylate cyclase-inhibiting G alpha protein) [MASS=40230]                                                                                                                                    | 1.00 | 11.90 | 0.68 | 0.15 | 5 | 3 |  | 2 | IIHEAGYSEEEC[330]KQYK                  | 1 |
|                                                                                                                                                                                                                                                                              |      |       |      |      |   |   |  | 2 | EIYTHFTC[330]ATDTK                     | 1 |
|                                                                                                                                                                                                                                                                              |      |       |      |      |   |   |  | 2 | EIYTHFTC[339]ATDTK                     | 1 |
|                                                                                                                                                                                                                                                                              |      |       |      |      |   |   |  | 2 | IIHEAGYSEEEC[330]K                     | 1 |
|                                                                                                                                                                                                                                                                              |      |       |      |      |   |   |  | 3 | IIHEAGYSEEEC[330]KQYK                  | 1 |
| GNAI2_HUMAN (P04899) Guanine nucleotide-binding protein G(i), alpha-2 subunit (Adenylate cyclase-inhibiting G alpha protein) [MASS=40319]                                                                                                                                    | 0.86 | 8.19  | 0.59 | 0.00 | 1 | 1 |  | 3 | ITHSPLTIC[330]FPEYTGANKYDEAASYIQSK     | 1 |
| GNAI3_HUMAN (P08754) Guanine nucleotide-binding protein G(k) subunit alpha (G(i) alpha-3) [MASS=40401]                                                                                                                                                                       | 0.00 | 4.82  | *    | *    | * | 1 |  | 2 | AAKEVKLLLLGAGESGK                      | 1 |
| GNAL_HUMAN (P38405) Guanine nucleotide-binding protein G(olf) subunit alpha (Adenylate cyclase-stimulating G alpha protein, olfactory type) [MASS=44308]                                                                                                                     | 0.00 | 7.87  | *    | *    | * | 2 |  | 3 | HYC[330]YPHFTC[330]AVDTENIR            | 1 |
|                                                                                                                                                                                                                                                                              |      |       |      |      |   |   |  | 2 | TTEDQGVDEKERR                          | 1 |



|                                                                                                                                                                                                                    |      |       |      |      |   |   |  |   |                                            |   |
|--------------------------------------------------------------------------------------------------------------------------------------------------------------------------------------------------------------------|------|-------|------|------|---|---|--|---|--------------------------------------------|---|
|                                                                                                                                                                                                                    |      |       |      |      |   |   |  | 3 | SPLTIC[339]FPEYTGPNYEDAAAYIQAQFESK         | 1 |
|                                                                                                                                                                                                                    |      |       |      |      |   |   |  | 2 | M[147]HESLM[330]NNK                        | 1 |
|                                                                                                                                                                                                                    |      |       |      |      |   |   |  | 2 | SPLTIC[330]FPEYTGPNYEDAAAYIQAQFESK         | 1 |
|                                                                                                                                                                                                                    |      |       |      |      |   |   |  | 3 | YYLDSLDRIGAADYQPTEQDILRTR                  | 1 |
|                                                                                                                                                                                                                    |      |       |      |      |   |   |  | 2 | M[147]VC[330]DVVSR                         | 3 |
| GNAO1_HUMAN (P09471) Guanine nucleotide-binding protein G(o) subunit alpha 1 [MASS=39919]                                                                                                                          | 1.00 | 30.88 | 0.46 | 0.27 | 8 | 5 |  | 2 | MVC[339]DVVSR                              | 1 |
|                                                                                                                                                                                                                    |      |       |      |      |   |   |  | 3 | KSPLTIC[339]FPEYTGPNYEDAAAYIQAQFESK        | 1 |
|                                                                                                                                                                                                                    |      |       |      |      |   |   |  | 2 | MHESLM[147]LFDSIC[330]NNK                  | 1 |
|                                                                                                                                                                                                                    |      |       |      |      |   |   |  | 2 | MVC[330]DVVSR                              | 2 |
|                                                                                                                                                                                                                    |      |       |      |      |   |   |  | 2 | M[147]VC[339]DVVSR                         | 2 |
|                                                                                                                                                                                                                    |      |       |      |      |   |   |  | 3 | SPLTIC[330]FPEYTGPNYEDAAAYIQAQFESK         | 2 |
|                                                                                                                                                                                                                    |      |       |      |      |   |   |  | 2 | M[147]HESLM[147]LFDSIC[330]NNK             | 1 |
| GNAO2_HUMAN (P29777) Guanine nucleotide-binding protein G(o) subunit alpha 2 [MASS=39955]                                                                                                                          | 1.00 | 8.50  | 0.07 | 0.00 | 1 | 1 |  | 2 | SPLTIC[330]FPEYTGPSAFTEAVAYIQAQYESK        | 1 |
| GNAS_HUMAN (P63092) Guanine nucleotide-binding protein G(s) subunit alpha (Adenylate cyclase-stimulating G alpha protein) [MASS=45664]                                                                             | 1.00 | 13.20 | 0.81 | 0.20 | 2 | 2 |  | 3 | SNEYQLIDC[330]AQYFLDKIDVIK                 | 1 |
|                                                                                                                                                                                                                    |      |       |      |      |   |   |  | 3 | NNLKEAIETIVAAM[147]SNLVPPVELANPENQFR       | 1 |
| GNB1L_HUMAN (Q9BYB4) Guanine nucleotide-binding protein subunit beta-like protein 1 (G protein subunit beta-like protein 1) (WD40 repeat-containing protein deleted in VCFS) (Protein WDVCF) (DGCRK3) [MASS=35618] | *    | 3.98  | *    | *    | * | 1 |  | 2 | KILATAGWDHRIR                              | 1 |
| GGOB1_HUMAN (Q14789) Golgin subfamily B member 1 (Giantin) (Macrogolgin) (372 kDa Golgi complex-associated protein) (GCP372) [MASS=376075]                                                                         | 0.00 | 1.26  | 1.17 | 0.00 | 1 | 3 |  | 2 | QKPEEIGEESR                                | 1 |
|                                                                                                                                                                                                                    |      |       |      |      |   |   |  | 2 | RIAELEEELVC[339]VQK                        | 1 |
|                                                                                                                                                                                                                    |      |       |      |      |   |   |  | 3 | ALHTQLEMQAKEHDER                           | 1 |
| GP115_HUMAN (Q8IZF3) Probable G-protein coupled receptor 115 (G-protein coupled receptor PGR18) [MASS=83830]                                                                                                       | 0.00 | 4.12  | 0.34 | 0.00 | 1 | 2 |  | 2 | C[330]NYTSVVMSFSILMSSK                     | 1 |
|                                                                                                                                                                                                                    |      |       |      |      |   |   |  | 2 | RWDEKAC[339]QMM[147]LDIR                   | 1 |
| GP150_HUMAN (Q8NGU9) Probable G-protein coupled receptor 150 [MASS=46353]                                                                                                                                          | 0.00 | 13.82 | 1.47 | 0.00 | 1 | 2 |  | 3 | LVFLGVILVVAVAGNTTLC[339]RLC[330]GGGGPWAGPK | 1 |
|                                                                                                                                                                                                                    |      |       |      |      |   |   |  | 2 | AKVQSLKMSLLLALLFVGC[339]ELPYFAAR           | 1 |

|                                                                                                                                                                                         |      |       |      |      |   |   |   |                                           |   |
|-----------------------------------------------------------------------------------------------------------------------------------------------------------------------------------------|------|-------|------|------|---|---|---|-------------------------------------------|---|
| GP158_HUMAN (Q5T848) Probable G-protein coupled receptor 158 precursor [MASS=135488]                                                                                                    | *    | 5.93  | *    | *    | * | 3 | 2 | MGAM[147]AYPLLLC[339]LLLAQLGLGAVGASRDPQGR | 1 |
|                                                                                                                                                                                         |      |       |      |      |   |   | 3 | VDINLQKVIDIDQC[339]SSDGWFSGTHK            | 1 |
|                                                                                                                                                                                         |      |       |      |      |   |   | 3 | TSM[147]LQKSLSVIASAKEK                    | 1 |
| GP162_HUMAN (Q16538) Probable G-protein coupled receptor 162 (Gene-rich cluster gene A protein) [MASS=63930]                                                                            | *    | 3.57  | *    | *    | * | 1 | 2 | HRLEDEEDEEEEAEGGGLASLR                    | 1 |
| GPDH_HUMAN (P43304) Glycerol-3-phosphate dehydrogenase, mitochondrial precursor (EC 1.1.99.5) (GPD-M) (GPDH-M) (mtGPD) [MASS=80833]                                                     | 0.98 | 8.67  | 1.55 | 0.00 | 1 | 3 | 2 | C[339]KDVLTKQEFQDVR                       | 1 |
|                                                                                                                                                                                         |      |       |      |      |   |   | 3 | MVKEALHERANLLEIAPHLSAPLPIM[147]LPVYK      | 1 |
|                                                                                                                                                                                         |      |       |      |      |   |   | 3 | LYDLVAGSNC[339]LKSSYVLSK                  | 1 |
| GPM6A_HUMAN (P51674) Neuronal membrane glycoprotein M6-a (M6a) [MASS=31209]                                                                                                             | 1.00 | 7.55  | 0.36 | 0.13 | 3 | 2 | 2 | KIC[339]TVSENFLR                          | 1 |
|                                                                                                                                                                                         |      |       |      |      |   |   | 2 | KIC[330]TVSENFLR                          | 1 |
|                                                                                                                                                                                         |      |       |      |      |   |   | 2 | IC[330]TVSENFLR                           | 1 |
| GPM6B_HUMAN (Q13491) Neuronal membrane glycoprotein M6-b (M6b) [MASS=28989]                                                                                                             | 0.98 | 3.40  | 0.49 | 0.03 | 2 | 1 | 2 | SREDC[330]C[330]TKF                       | 1 |
|                                                                                                                                                                                         |      |       |      |      |   |   | 2 | SREDC[339]C[339]TKF                       | 1 |
|                                                                                                                                                                                         |      |       |      |      |   |   | 2 | TREKLC[330]FLDK                           | 2 |
| GPSN2_HUMAN (Q9NZ01) Synaptic glycoprotein SC2 [MASS=36034]                                                                                                                             | 0.00 | 9.42  | 0.67 | 0.00 | 1 | 2 | 2 | EKLC[330]FLDKVEPHATIAEIK                  | 1 |
|                                                                                                                                                                                         |      |       |      |      |   |   | 2 | TREKLC[339]FLDK                           | 1 |
|                                                                                                                                                                                         |      |       |      |      |   |   | 3 | C[339]QGPPGVDLYRLEK                       | 3 |
| GPVI_HUMAN (Q9HCN6) Platelet glycoprotein VI precursor [MASS=36923]                                                                                                                     | 0.30 | 4.13  | 1.69 | 0.11 | 2 | 1 |   |                                           |   |
| GRAA_HUMAN (P12544) Granzyme A precursor (EC 3.4.21.78) (Cytotoxic T-lymphocyte proteinase 1) (Hanukkah factor) (H factor) (HF) (Granzyme-1) (CTL tryptase) (Fragmentin-1) [MASS=28969] | *    | 15.65 | *    | *    | * | 2 | 2 | EEPTKQIMLVKK                              | 1 |
|                                                                                                                                                                                         |      |       |      |      |   |   | 3 | GDDVKPGTMC[330]QVAGWGRTHNSASWSDTLR        | 1 |
| GRIA1_HUMAN (P42261) Glutamate receptor 1 precursor (GluR-1) (GluR-A) (GluR-K1) (Glutamate receptor ionotropic, AMPA 1) (AMPA-selective glutamate receptor 1) [MASS=101535]             | *    | 1.99  | *    | *    | * | 2 | 3 | PFM[147]SLGISIM[147]IKK                   | 1 |
|                                                                                                                                                                                         |      |       |      |      |   |   | 1 | HDSIR                                     | 1 |
| GRIA4_HUMAN (P48058) Glutamate receptor 4 precursor (GluR-4) (GluR4) (GluR-D) (Glutamate receptor ionotropic, AMPA 4) (AMPA-selective glutamate receptor 4) [MASS=100809]               | 0.00 | 1.11  | 0.90 | 0.00 | 1 | 1 | 2 | KFVIDC[330]EIER                           | 1 |

|                                                                                                                                                                                                                                                                |                                  |       |      |      |   |   |   |                                        |   |
|----------------------------------------------------------------------------------------------------------------------------------------------------------------------------------------------------------------------------------------------------------------|----------------------------------|-------|------|------|---|---|---|----------------------------------------|---|
| GRIK3_HUMAN (Q13003) Glutamate receptor, ionotropic kainate 3 precursor (Glutamate receptor 7) (GluR-7) (GluR7) (Excitatory amino acid receptor 5) (EAA5) [MASS=104031]                                                                                        | *                                | 2.29  | *    | *    | * | 2 | 2 | PSALVKNNEEGIQR                         | 1 |
|                                                                                                                                                                                                                                                                |                                  |       |      |      |   |   | 2 | GMPHVIR                                | 1 |
| GRIK4_HUMAN (Q16099) Glutamate receptor, ionotropic kainate 4 precursor (Glutamate receptor KA-1) (KA1) (Excitatory amino acid receptor 1) (EAA1) [MASS=107229]                                                                                                | 0.00                             | 3.14  | *    | *    | * | 2 | 2 | YEGFC[330]VDM[147]LKELAEILR            | 1 |
|                                                                                                                                                                                                                                                                |                                  |       |      |      |   |   | 2 | DPTPLLKEIRDDK                          | 1 |
| GRIN1_HUMAN (Q7Z2K8) G protein-regulated inducer of neurite outgrowth 1 (GRIN1) [MASS=102371]                                                                                                                                                                  | 0.00                             | 6.25  | *    | *    | * | 4 | 1 | DPGPSGK                                | 2 |
|                                                                                                                                                                                                                                                                |                                  |       |      |      |   |   | 3 | PTAFFC[330]PQDGSLGAGSSAM[147]R         | 1 |
|                                                                                                                                                                                                                                                                |                                  |       |      |      |   |   | 2 | VRPGSALAAVAPPEPAEPVR                   | 1 |
|                                                                                                                                                                                                                                                                |                                  |       |      |      |   |   | 3 | ETPQASEKVDPGSC[330]R                   | 1 |
| GRK7_HUMAN (Q8WTQ7) G protein-coupled receptor kinase 7 precursor (EC 2.7.11.16) (G protein-coupled receptor kinase GRK7) [MASS=62211]                                                                                                                         | 0.00                             | 6.33  | 0.64 | 0.00 | 1 | 2 | 2 | SLALPGLQGC[330]AELR                    | 1 |
|                                                                                                                                                                                                                                                                |                                  |       |      |      |   |   | 2 | FLQWKLFEM[147]QPVSDKYFTEFR             | 1 |
| GRN_HUMAN (P28799) Granulins precursor (Proepithelin) (PEPI) [Contains: Acrogranin; Paragranulin; Granulin-1 (Granulin G); Granulin-2 (Granulin F); Granulin-3 (Granulin B); Granulin-4 (Granulin A); Granulin-5 (Granulin C); Granulin-6 (Granulin D); Granul | *                                | 1.18  | *    | *    | * | 1 | 1 | SPHVGVK                                | 1 |
| GRP75_HUMAN (P38646) Stress-70 protein, mitochondrial precursor (75 kDa glucose-regulated protein) (GRP 75) (Peptide-binding protein 74) (PBP74) (Mortalin) (MOT) [MASS=73680]                                                                                 | 0.00                             | 3.24  | 1.19 | 0.08 | 2 | 2 | 2 | TIAPC[339]QK                           | 1 |
|                                                                                                                                                                                                                                                                |                                  |       |      |      |   |   | 2 | M[147]EEFKDQLPADEC[339]NK              | 1 |
| GSLG1_HUMAN (Q92896) Golgi apparatus protein 1 precursor (Golgi sialoglycoprotein MG-160) (E-selectin ligand 1) (ESL-1) (Cysteine-rich fibroblast growth factor receptor) (CFR-1) [MASS=134592]                                                                | *                                | 8.57  | *    | *    | * | 5 | 3 | AILRVAELSSDDFHLDRHLYFAC[330]R          | 1 |
|                                                                                                                                                                                                                                                                |                                  |       |      |      |   |   | 2 | LDPALQDKC[330]LIDLGK                   | 1 |
|                                                                                                                                                                                                                                                                |                                  |       |      |      |   |   | 3 | VAPADGFSDLAM[147]QVM[147]TSPSK         | 1 |
|                                                                                                                                                                                                                                                                |                                  |       |      |      |   |   | 2 | VAPADGFSDLAM[147]QVM[147]TSPSK         | 1 |
|                                                                                                                                                                                                                                                                |                                  |       |      |      |   |   | 3 | VFKLQETEMMDPELDYTLMR                   | 1 |
| 3                                                                                                                                                                                                                                                              | SDIKNFC[339]SAVQYGNAQIIEC[330]LK | 1     |      |      |   |   |   |                                        |   |
| GSTA3_HUMAN (Q16772) Glutathione S-transferase A3-3 (EC 2.5.1.18) (GST class-alpha) [MASS=25301]                                                                                                                                                               | 0.00                             | 10.81 | 0.68 | 0.00 | 1 | 1 | 3 | ALIDM[147]YTEGM[147]ADLNEMILLPLC[330]R | 1 |

|                                                                                                                                                                                                                        |      |       |      |      |   |   |   |                                           |   |
|------------------------------------------------------------------------------------------------------------------------------------------------------------------------------------------------------------------------|------|-------|------|------|---|---|---|-------------------------------------------|---|
| GSTO1_HUMAN (P78417) Glutathione transferase omega-1 (EC 2.5.1.18) (GSTO 1-1) [MASS=27566]                                                                                                                             | 0.00 | 7.05  | 0.42 | 0.00 | 1 | 1 | 2 | LEAM[147]KLNEC[330]VDHTPKLK               | 1 |
| GTR3_HUMAN (P11169) Solute carrier family 2, facilitated glucose transporter member 3 (Glucose transporter type 3, brain) [MASS=53924]                                                                                 | *    | 5.44  | *    | *    | * | 1 | 2 | AFEGQAHGADRSGKDGVM[147]EMNSIEPAK          | 1 |
| GTR8_HUMAN (Q9NY64) Solute carrier family 2, facilitated glucose transporter member 8 (Glucose transporter type 8) (Glucose transporter type X1) [MASS=50793]                                                          | *    | 6.50  | *    | *    | * | 1 | 3 | KLSLLLC[330]SVPFVAGFAVITAAQDVWM[147]LLGGR | 1 |
| GUAA_HUMAN (P49915) GMP synthase [glutamine-hydrolyzing] (EC 6.3.5.2) (Glutamine amidotransferase) (GMP synthetase) [MASS=76715]                                                                                       | *    | 3.75  | *    | *    | * | 1 | 3 | ISQM[147]PVILTPLHFDRDPLQKQPSC[339]QR      | 1 |
| GUAD_HUMAN (Q9Y2T3) Guanine deaminase (EC 3.5.4.3) (Guanase) (Guanine aminase) (Guanine aminohydrolase) (GAH) (p51-nedasin) [MASS=51003]                                                                               | 0.91 | 5.73  | 0.44 | 0.00 | 1 | 1 | 3 | GASIAHC[330]PNSNLSLSSGFLNVLEVLK           | 1 |
| GUC2F_HUMAN (P51841) Retinal guanylyl cyclase 2 precursor (EC 4.6.1.2) (Guanylate cyclase 2F, retinal) (RETGC-2) (Rod outer segment membrane guanylate cyclase 2) (ROS-GC2) (Guanylate cyclase F) (GC-F) [MASS=124821] | 0.00 | 2.08  | 0.81 | 0.00 | 1 | 1 | 3 | PPPVYRPVVPPEHAPPEC[339]LQLM[147]K         | 1 |
| GUSL1_HUMAN (Q9NQ0) Beta-glucuronidase-like protein 1 (SMA3-like protein) [MASS=15472]                                                                                                                                 | 0.00 | 7.86  | *    | *    | * | 1 | 2 | LEVC[330]LLNAENK                          | 1 |
| GUSL3_HUMAN                                                                                                                                                                                                            | 0.00 | 15.71 | 0.38 | 0.00 | 1 | 1 | 3 | LLLLVSQLRAPGVDSAAAGRPV                    | 1 |
| HBB_HUMAN (P68871) Hemoglobin subunit beta (Hemoglobin beta chain) (Beta-globin) [MASS=15867]                                                                                                                          | 1.00 | 23.97 | 0.52 | 0.11 | 4 | 2 | 3 | GTFATLSELHC[339]DKLHVDPENFR               | 1 |
|                                                                                                                                                                                                                        |      |       |      |      |   |   | 2 | GTFATLSELHC[330]DK                        | 1 |
|                                                                                                                                                                                                                        |      |       |      |      |   |   | 3 | GTFATLSELHC[330]DKLHVDPENFR               | 1 |
|                                                                                                                                                                                                                        |      |       |      |      |   |   | 2 | GTFATLSELHC[330]DKLHVDPENFR               | 1 |

|                                                                                                                                                                                                                                                                            |      |       |      |      |   |   |             |                                                                                                   |             |
|----------------------------------------------------------------------------------------------------------------------------------------------------------------------------------------------------------------------------------------------------------------------------|------|-------|------|------|---|---|-------------|---------------------------------------------------------------------------------------------------|-------------|
| HCD2_HUMAN (Q99714) 3-hydroxyacyl-CoA dehydrogenase type-2 (EC 1.1.1.35) (3-hydroxyacyl-CoA dehydrogenase type II) (Type II HADH) (3-hydroxy-2-methylbutyryl-CoA dehydrogenase) (EC 1.1.1.178) (Endoplasmic reticulum-associated amyloid beta-peptide-binding [MASS=26792] | 0.00 | 10.38 | 0.99 | 0.00 | 1 | 1 | 3           | KLGNNC[339]VFAPADVTSEKDVQTALALAK                                                                  | 1           |
| HCDH_HUMAN (Q16836) Short chain 3-hydroxyacyl-CoA dehydrogenase, mitochondrial precursor (EC 1.1.1.35) (HCDH) (Medium and short chain L-3-hydroxyacyl-coenzyme A dehydrogenase) [MASS=34277]                                                                               | *    | 4.46  | *    | *    | * | 1 | 2           | FAGLHFFNPVPMK                                                                                     | 1           |
| HD_HUMAN (P42858) Huntingtin (Huntington disease protein) (HD protein) [MASS=347857]                                                                                                                                                                                       | *    | 1.53  | *    | *    | * | 2 | 3<br>2      | TPPELLQTLTAVGGIGQLTAAKEESGGR<br>LLC[339]TPFRVLARMVDILAC[339]R                                     | 1<br>1      |
| HEAT1_HUMAN (Q9H583) HEAT repeat-containing protein 1 (Protein BAP28) [MASS=242369]                                                                                                                                                                                        | *    | 0.98  | *    | *    | * | 1 | 2           | NTSELVSSEVYLLSALAALQK                                                                             | 1           |
| HEAT2_HUMAN (Q86Y56) HEAT repeat-containing protein 2 [MASS=93533]                                                                                                                                                                                                         | 0.00 | 2.57  | 1.00 | 0.00 | 1 | 1 | 2           | AQETM[147]DSLAMVEGVSSC[339]QDLYR                                                                  | 1           |
| HECD1_HUMAN (Q9ULT8) E3 ubiquitin-protein ligase HECTD1 (HECT domain-containing protein 1) (E3 ligase for inhibin receptor) (EULIR) [MASS=289593]                                                                                                                          | 0.00 | 2.11  | 1.23 | 0.00 | 1 | 3 | 2<br>2<br>3 | VDATDASYPSVNTC[339]VHYLK<br>RLLPVFAQTFQQTMLPSIR<br>ALC[339]NRLVVVELNNRTSR                         | 1<br>1<br>1 |
| HELI_HUMAN (Q9UKS7) Zinc finger protein Helios [MASS=59559]                                                                                                                                                                                                                | *    | 3.99  | *    | *    | * | 1 | 3           | LKC[339]DVC[339]GMVC[339]IGPNVLM[147]VHKR                                                         | 1           |
| HELZ_HUMAN (P42694) Probable helicase with zinc-finger domain (EC 3.6.1.-) [MASS=218970]                                                                                                                                                                                   | *    | 0.67  | *    | *    | * | 1 | 2           | QWDEQLDPRLNAK                                                                                     | 1           |
| HEM1_HUMAN (P13196) 5-aminolevulinate synthase, nonspecific, mitochondrial precursor (EC 2.3.1.37) (5-aminolevulinic acid synthase) (Delta-aminolevulinate synthase) (Delta-ALA synthetase) (ALAS-H) [MASS=70580]                                                          | 0.00 | 10.78 | 0.60 | 0.00 | 1 | 3 | 2<br>2<br>3 | TDGGDPSGLLKNFQDIMQK<br>M[147]M[147]PGC[330]EIYSDSGNHASM[147]IQGIR<br>SYAAGFIFTTSLPPMLLAGALESVRILK | 1<br>1<br>1 |
| HEM6_HUMAN (P36551) Coproporphyrinogen III oxidase, mitochondrial precursor (EC 1.3.3.3) (Coproporphyrinogenase) (Coprogen oxidase) (COX) [MASS=50152]                                                                                                                     | 0.00 | 2.20  | *    | *    | * | 1 | 1           | YVEFNLLYDR                                                                                        | 1           |

|                                                                                                                                                                                                    |      |       |      |      |   |   |   |                                              |   |
|----------------------------------------------------------------------------------------------------------------------------------------------------------------------------------------------------|------|-------|------|------|---|---|---|----------------------------------------------|---|
| HEP2_HUMAN (P05546) Heparin cofactor 2 precursor (Heparin cofactor II) (HC-II) (Protease inhibitor leuserpin 2) (HLS2) [MASS=57070]                                                                | 0.00 | 4.21  | 2.59 | 0.00 | 1 | 1 | 2 | DALENIDPATQMMILNC[339]IYFK                   | 1 |
| HGF_HUMAN (P14210) Hepatocyte growth factor precursor (Scatter factor) (SF) (Hepatopoeitin A) [Contains: Hepatocyte growth factor alpha chain; Hepatocyte growth factor beta chain] [MASS=83133]   | 0.00 | 2.06  | 1.40 | 0.00 | 1 | 1 | 2 | NKGLPFTC[339]KAFVFDK                         | 2 |
| HIC1_HUMAN (Q14526) Hypermethylated in cancer 1 protein (Hic-1) (Zinc finger and BTB domain-containing protein 29) [MASS=76467]                                                                    | 0.00 | 5.73  | 1.09 | 0.00 | 1 | 2 | 2 | GGSGSPGPEPPGRPDGPSLLYR                       | 1 |
|                                                                                                                                                                                                    |      |       |      |      |   |   | 2 | SGEC[330]AGQTMLDTMEAPGHSR                    | 1 |
| HIG2A_HUMAN (Q9BW72) HIG1 domain family member 2A [MASS=11528]                                                                                                                                     | *    | 16.04 | *    | *    | * | 1 | 3 | M[147]ATPGPVIPEVPFEPK                        | 1 |
| HINT1_HUMAN (P49773) Histidine triad nucleotide-binding protein 1 (Adenosine 5'-monophosphoramidase) (Protein kinase C inhibitor 1) (Protein kinase C-interacting protein 1) (PKCI-1) [MASS=13671] | 0.00 | 52.00 | 1.41 | 0.00 | 1 | 2 | 3 | HISQISVAEDDDESLLGHLM[147]IVGKKC[339]AADLGLNK | 1 |
|                                                                                                                                                                                                    |      |       |      |      |   |   | 3 | MVVNEGSDGGQSVYHVHLHVLGGRQM[147]HWPPG         | 1 |
| HIP1_HUMAN (O00291) Huntingtin-interacting protein 1 (HIP-1) [MASS=115442]                                                                                                                         | *    | 2.04  | *    | *    | * | 1 | 3 | MWGHLSSEGYQLC[330]SIYLKLLR                   | 1 |
|                                                                                                                                                                                                    |      |       |      |      |   |   | 3 | VTLSDEGFYEC[339]IAVSSAGTGR                   | 1 |
|                                                                                                                                                                                                    |      |       |      |      |   |   | 3 | NAAPKDAGIYGC[339]LASNSAGTDK                  | 1 |
| HMCN1_HUMAN (Q96RW7) Hemicentin-1 precursor (Fibulin-6) (FIBL-6) [MASS=613386]                                                                                                                     | *    | 2.84  | *    | *    | * | 7 | 2 | C[339]MAANTAGDHHKKEFEVTVHVPPTIK              | 1 |
|                                                                                                                                                                                                    |      |       |      |      |   |   | 3 | MLRLM[147]QTTMEDAGQYTC[330]VVR               | 1 |
|                                                                                                                                                                                                    |      |       |      |      |   |   | 3 | RTVDLTVQVPPSIADPTDFLVTK                      | 1 |
|                                                                                                                                                                                                    |      |       |      |      |   |   | 3 | YSILENGFLHIQSAHVTDGTGR                       | 1 |
|                                                                                                                                                                                                    |      |       |      |      |   |   | 3 | AETEDSGKYTC[339]IASNEAGEVSKHFILK             | 1 |
| HMCS1_HUMAN (Q01581) Hydroxymethylglutaryl-CoA synthase, cytoplasmic (EC 2.3.3.10) (HMG-CoA synthase) (3-hydroxy-3-methylglutaryl coenzyme A synthase) [MASS=57293]                                | 0.00 | 1.92  | 2.22 | 0.00 | 1 | 1 | 2 | NNLSYDC[339]IGR                              | 1 |
| HPLN2_HUMAN (Q9GZV7) Hyaluronan and proteoglycan link protein 2 precursor (Brain link protein 1) [MASS=37775]                                                                                      | 0.96 | 9.12  | 0.49 | 0.07 | 2 | 2 | 2 | LTLSEAHAAC[330]JR                            | 1 |
|                                                                                                                                                                                                    |      |       |      |      |   |   | 2 | SFGFPRPQQAAYGTYC[330]YAEN                    | 1 |

|                                                                                                                                                                                                         |      |       |      |      |   |   |   |                                        |   |
|---------------------------------------------------------------------------------------------------------------------------------------------------------------------------------------------------------|------|-------|------|------|---|---|---|----------------------------------------|---|
| HPRT_HUMAN (P00492) Hypoxanthine-guanine phosphoribosyltransferase (EC 2.4.2.8) (HGPRT) (HGPRTase) [MASS=24448]                                                                                         | *    | 12.44 | *    | *    | * | 1 | 3 | FVVGALDYNEYFRDLNHVC[330]VISETGK        | 1 |
| HRX_HUMAN (Q03164) Zinc finger protein HRX (ALL-1) (Trithorax-like protein) [MASS=431748]                                                                                                               | *    | 1.99  | *    | *    | * | 5 | 3 | ATSM[147]DLPMRFR                       | 1 |
|                                                                                                                                                                                                         |      |       |      |      |   |   | 2 | RFIEDDYDPPKIAR                         | 1 |
|                                                                                                                                                                                                         |      |       |      |      |   |   | 3 | PEDAGEKEHVTKSSVGHK                     | 1 |
|                                                                                                                                                                                                         |      |       |      |      |   |   | 2 | LFSPHSGTRFDM[147]HKR                   | 1 |
|                                                                                                                                                                                                         |      |       |      |      |   |   | 2 | ATSMDLPMRFRHLK                         | 1 |
| HS105_HUMAN (Q92598) Heat-shock protein 105 kDa (Heat shock 110 kDa protein) (Antigen NY-CO-25) [MASS=96864]                                                                                            | 0.98 | 5.36  | 0.58 | 0.00 | 1 | 2 | 3 | IKELNNTC[330]EPVVTQPKPK                | 1 |
|                                                                                                                                                                                                         |      |       |      |      |   |   | 3 | LMSSNSTDLPLNIEC[339]FMNDKDVSGKM[147]NR | 1 |
| HS90A_HUMAN (P07900) Heat shock protein HSP 90-alpha (HSP 86) (NY-REN-38 antigen) [MASS=84528]                                                                                                          | 0.63 | 2.60  | 0.84 | 0.00 | 1 | 1 | 2 | VFIM[147]DNC[339]EELIPEYLNfir          | 1 |
| HSF2B_HUMAN (O75031) Heat shock factor 2-binding protein [MASS=37644]                                                                                                                                   | 0.00 | 5.99  | 1.46 | 0.00 | 1 | 1 | 2 | VLLDTILQLLGDLPKPGQC[339]TK             | 1 |
| HSP71_HUMAN (P08107) Heat shock 70 kDa protein 1 (HSP70.1) (HSP70-1/HSP70-2) [MASS=70052]                                                                                                               | 0.92 | 3.43  | 1.92 | 0.00 | 1 | 1 | 2 | AAAIGIDLGTYS[330]VGVFQHGK              | 1 |
| HSP7C_HUMAN (P11142) Heat shock cognate 71 kDa protein (Heat shock 70 kDa protein 8) [MASS=70898]                                                                                                       | *    | 1.39  | *    | *    | * | 1 | 1 | EIAEAYLGK                              | 1 |
|                                                                                                                                                                                                         |      |       |      |      |   |   | 2 | SAATSGAGSTTSGVVSGLGSR                  | 1 |
| HUWE1_HUMAN (Q7Z6Z7) HECT, UBA and WWE domain-containing protein 1 (EC 6.3.2.-) (E3 ubiquitin protein ligase URE-B1) (Mcl-1 ubiquitin ligase E3) (Mule) (ARF-binding protein 1) (ARF-BP1) [MASS=481888] | *    | 3.61  | *    | *    | * | 8 | 2 | SFDQADRAKFLQFVTGTSK                    | 1 |
|                                                                                                                                                                                                         |      |       |      |      |   |   | 2 | HWVIRLLSILQR                           | 1 |
|                                                                                                                                                                                                         |      |       |      |      |   |   | 3 | AKFLQFVTGTSKVPLQGFAALEGM[147]NGIQK     | 1 |
|                                                                                                                                                                                                         |      |       |      |      |   |   | 2 | M[147]ILNLTQSSGFNGFTPLVTLILLR          | 1 |
|                                                                                                                                                                                                         |      |       |      |      |   |   | 3 | STRM[147]ILNLTQSSGFNGFTPLVTLILLR       | 1 |
|                                                                                                                                                                                                         |      |       |      |      |   |   | 1 | RKYFR                                  | 1 |
|                                                                                                                                                                                                         |      |       |      |      |   |   | 2 | FRLTFFIC[330]SVGFTSPM[147]LFDER        | 1 |
| HV3G_HUMAN (P01768) Ig heavy chain V-III region CAM [MASS=13668]                                                                                                                                        | *    | 21.31 | *    | *    | * | 1 | 3 | DBSKBTLYLQM[147]NSLRAEBTAVYYC[330]AR   | 1 |
| HV3L_HUMAN (P01773) Ig heavy chain V-III region BUR [MASS=12981]                                                                                                                                        | *    | 18.49 | *    | *    | * | 1 | 2 | BTLYLZM[147]KTLRTEDTAVYYC[339]AK       | 1 |
| HXB3_HUMAN (P14651) Homeobox protein Hox-B3 (Hox-2G) (Hox-2.7) [MASS=44344]                                                                                                                             | *    | 3.71  | *    | *    | * | 1 | 2 | SAC[339]SLQSLGNAAPHA                   | 1 |
| HXD12_HUMAN (P35452) Homeobox protein Hox-D12 (Hox-4H) [MASS=29535]                                                                                                                                     | *    | 17.82 | *    | *    | * | 2 | 2 | AAKYDYAGVGRATPGSTLLQGAPC[330]APGFK     | 1 |
|                                                                                                                                                                                                         |      |       |      |      |   |   | 2 | RC[339]PC[330]SPGRPAVGGGPGEAR          | 1 |

|                                                                                                                                                                        |      |       |      |      |    |    |  |   |                                     |   |
|------------------------------------------------------------------------------------------------------------------------------------------------------------------------|------|-------|------|------|----|----|--|---|-------------------------------------|---|
|                                                                                                                                                                        |      |       |      |      |    |    |  | 3 | M[147]C[339]INTEWGAFGDDGSLEDIRTEFDR | 1 |
|                                                                                                                                                                        |      |       |      |      |    |    |  | 2 | AAQLC[330]GAGM[147]AAVVDK           | 2 |
|                                                                                                                                                                        |      |       |      |      |    |    |  | 2 | AAQLC[339]GAGM[147]AAVVDKIR         | 1 |
|                                                                                                                                                                        |      |       |      |      |    |    |  | 2 | C[339]NVSFLLSEDGSGK                 | 1 |
|                                                                                                                                                                        |      |       |      |      |    |    |  | 2 | AILQQLGLNSTC[330]DDSILVK            | 2 |
|                                                                                                                                                                        |      |       |      |      |    |    |  | 2 | LPVGFTFSFPC[330]QQSK                | 1 |
|                                                                                                                                                                        |      |       |      |      |    |    |  | 3 | LGVEPSDDDC[339]VSVQHVC[339]TIVSFR   | 1 |
|                                                                                                                                                                        |      |       |      |      |    |    |  | 2 | AILQQLGLNSTC[339]DDSILVK            | 3 |
| HXK1_HUMAN (P19367) Hexokinase-1 (EC 2.7.1.1) (Hexokinase type I) (HK I) (Brain form hexokinase) [MASS=102484]                                                         | 1.00 | 19.85 | 1.17 | 0.08 | 26 | 11 |  | 2 | ATDC[339]VGHDVVTLR                  | 1 |
|                                                                                                                                                                        |      |       |      |      |    |    |  | 2 | RAAQLC[339]GAGM[147]AAVVDK          | 1 |
|                                                                                                                                                                        |      |       |      |      |    |    |  | 2 | AAQLC[339]GAGM[147]AAVVDK           | 2 |
|                                                                                                                                                                        |      |       |      |      |    |    |  | 2 | KLPVGFTFSFPC[339]QQSK               | 1 |
|                                                                                                                                                                        |      |       |      |      |    |    |  | 2 | C[330]NVSFLLSEDGSGK                 | 1 |
|                                                                                                                                                                        |      |       |      |      |    |    |  | 2 | ATDC[330]VGHDVVTLR                  | 1 |
|                                                                                                                                                                        |      |       |      |      |    |    |  | 1 | ATDC[339]VGHDVVTLR                  | 1 |
|                                                                                                                                                                        |      |       |      |      |    |    |  | 3 | AILQQLGLNSTC[339]DDSILVK            | 1 |
|                                                                                                                                                                        |      |       |      |      |    |    |  | 1 | ATDC[330]VGHDVVTLR                  | 1 |
|                                                                                                                                                                        |      |       |      |      |    |    |  | 2 | LPVGFTFSFPC[339]QQSK                | 3 |
|                                                                                                                                                                        |      |       |      |      |    |    |  | 2 | TVC[330]GVVSR                       | 1 |
| IBP5_HUMAN (P24593) Insulin-like growth factor-binding protein 5 precursor (IGFBP-5) (IBP-5) (IGF-binding protein 5) [MASS=30570]                                      | *    | 5.15  | *    | *    | *  | 1  |  | 3 | HM[147]EASLQELKASPR                 | 1 |
| ICAM5_HUMAN (Q9UMF0) Intercellular adhesion molecule 5 precursor (ICAM-5) (Telencephalin) [MASS=97330]                                                                 | 1.00 | 2.81  | 0.43 | 0.06 | 3  | 2  |  | 2 | GNPEPSVHC[339]AR                    | 1 |
|                                                                                                                                                                        |      |       |      |      |    |    |  | 2 | GNPEPSVHC[330]AR                    | 1 |
|                                                                                                                                                                        |      |       |      |      |    |    |  | 2 | LFSC[330]EVDGKQPQSVK                | 1 |
| IDH3A_HUMAN (P50213) Isocitrate dehydrogenase [NAD] subunit alpha, mitochondrial precursor (EC 1.1.1.41) (Isocitric dehydrogenase) (NAD(+)-specific ICDH) [MASS=39591] | 0.96 | 7.38  | 1.00 | 0.02 | 3  | 2  |  | 2 | C[339]REVAESC[339]K                 | 1 |
|                                                                                                                                                                        |      |       |      |      |    |    |  | 2 | TFDLYANVRPC[339]VSIIEGYK            | 1 |
|                                                                                                                                                                        |      |       |      |      |    |    |  | 2 | C[330]REVAESC[330]K                 | 1 |



|                                                                                                                                                                                    |                    |       |       |      |   |   |   |                                       |   |
|------------------------------------------------------------------------------------------------------------------------------------------------------------------------------------|--------------------|-------|-------|------|---|---|---|---------------------------------------|---|
| IDH3G_HUMAN (P51553) Isocitrate dehydrogenase [NAD] subunit gamma, mitochondrial precursor (EC 1.1.1.41) (Isocitric dehydrogenase) (NAD(+)-specific ICDH) [MASS=42794]             | 1.00               | 6.11  | 1.28  | 0.05 | 2 | 2 | 2 | LGDGLFLQC[330]C[330]R                 | 1 |
|                                                                                                                                                                                    |                    |       |       |      |   |   | 2 | TSLDLYANVIHC[339]K                    | 1 |
| IDHP_HUMAN (P48735) Isocitrate dehydrogenase [NADP], mitochondrial precursor (EC 1.1.1.42) (Oxalosuccinate decarboxylase) (IDH) (NADP(+)-specific ICDH) (IDP) (ICD-M) [MASS=50909] | 1.00               | 15.27 | 1.10  | 0.10 | 8 | 5 | 2 | NILGGTVFREPIIC[339]K                  | 1 |
|                                                                                                                                                                                    |                    |       |       |      |   |   | 1 | DLAGC[330]IHGLSNVK                    | 1 |
|                                                                                                                                                                                    |                    |       |       |      |   |   | 2 | VC[330]VETVESGAM[147]TK               | 1 |
|                                                                                                                                                                                    |                    |       |       |      |   |   | 2 | C[330]ATITPDEAR                       | 1 |
|                                                                                                                                                                                    |                    |       |       |      |   |   | 2 | DLAGC[339]IHGLSNVK                    | 1 |
|                                                                                                                                                                                    |                    |       |       |      |   |   | 1 | DLAGC[339]IHGLSNVK                    | 1 |
|                                                                                                                                                                                    |                    |       |       |      |   |   | 2 | GKLDGNQDLIRFAQMLEK                    | 1 |
|                                                                                                                                                                                    |                    |       |       |      |   |   | 2 | NILGGTVFREPIIC[330]K                  | 1 |
| 2                                                                                                                                                                                  | DLAGC[330]IHGLSNVK | 1     |       |      |   |   |   |                                       |   |
| IDLC_HUMAN (O14645) Axonemal dynein light intermediate polypeptide 1 (Inner dynein arm light chain, axonemal) (hp28) [MASS=29662]                                                  | *                  | 3.49  | *     | *    | * | 1 | 2 | YDTPVLVSR                             | 1 |
| IF122_HUMAN (Q9HBG6) Intraflagellar transport 122 homolog (WD repeat protein 10) [MASS=141968]                                                                                     | *                  | 2.90  | *     | *    | * | 2 | 3 | IFC[330]LHVFSISAVEVPQSAPM[147]YQYLDRK | 1 |
|                                                                                                                                                                                    |                    |       |       |      |   |   | 3 | EWQM[147]ESLIR                        | 1 |
| IF140_HUMAN (Q96RY7) Intraflagellar transport 140 homolog (WD and tetratricopeptide repeats protein 2) [MASS=165192]                                                               | 0.00               | 1.50  | 1.40  | 0.00 | 1 | 2 | 2 | VASLC[339]WHPTR                       | 1 |
|                                                                                                                                                                                    |                    |       |       |      |   |   | 2 | AQAFKNAIRLC[330]K                     | 1 |
| IF2M_HUMAN (P46199) Translation initiation factor IF-2, mitochondrial precursor (IF-2Mt) (IF-2(Mt)) [MASS=81344]                                                                   | 0.00               | 4.54  | 0.39  | 0.00 | 1 | 2 | 2 | TGMDC[330]GLSLDEDNMEFQVGDR            | 1 |
|                                                                                                                                                                                    |                    |       |       |      |   |   | 2 | FKLTRNGHVIWK                          | 1 |
| IF3X_HUMAN (O75153) Putative eukaryotic translation initiation factor 3 subunit (eIF-3) [MASS=146669]                                                                              | 0.00               | 4.35  | 11.77 | 0.00 | 1 | 2 | 2 | NRDRAEPMATEPAPAGAPGDLGSQPPAAK         | 1 |
|                                                                                                                                                                                    |                    |       |       |      |   |   | 3 | TFPPDLNFLPVPGEELPEEC[339]ARAGFPR      | 1 |
| IF4G1_HUMAN (Q04637) Eukaryotic translation initiation factor 4 gamma 1 (eIF-4-gamma 1) (eIF-4G1) (eIF-4G 1) (p220) [MASS=175534]                                                  | *                  | 2.88  | *     | *    | * | 3 | 3 | RYDRELLGFQFIFASM[147]QK               | 1 |
|                                                                                                                                                                                    |                    |       |       |      |   |   | 2 | ELNKKEAVGDLLDAFK                      | 1 |
|                                                                                                                                                                                    |                    |       |       |      |   |   | 2 | DRGEEDADGSK                           | 1 |
| IF4G3_HUMAN (O43432) Eukaryotic translation initiation factor 4 gamma 3 (eIF-4-gamma 3) (eIF-4G 3) (eIF4G 3) (eIF-4-gamma II) (eIF4GII) [MASS=176651]                              | *                  | 2.33  | *     | *    | * | 2 | 3 | M[147]FFDC[330]LYDEEVISEDIFYK         | 1 |
|                                                                                                                                                                                    |                    |       |       |      |   |   | 3 | LDFIESDSPC[339]SSEALSCK               | 1 |

|                                                                                                                                                                                                                                                                                |                          |       |      |      |   |   |   |                                         |   |
|--------------------------------------------------------------------------------------------------------------------------------------------------------------------------------------------------------------------------------------------------------------------------------|--------------------------|-------|------|------|---|---|---|-----------------------------------------|---|
| IFRD1_HUMAN (O00458) Interferon-related developmental regulator 1 (Nerve growth factor-inducible protein PC4) [MASS=50268]                                                                                                                                                     | 0.62                     | 5.32  | 1.71 | 0.00 | 1 | 1 | 2 | AAAALASVLC[330]IQLGPGIESEEILK           | 1 |
| IF_HUMAN (P27352) Gastric intrinsic factor precursor (Intrinsic factor) (IF) (INF) [MASS=45416]                                                                                                                                                                                | 0.00                     | 7.19  | 0.07 | 0.00 | 1 | 1 | 2 | FAKTLANSSPFNVDTGAM[147]ATLALTC[330]MYNK | 1 |
| IG2R_HUMAN (P09565) Putative insulin-like growth factor 2-associated protein (Insulin-like growth factor II-associated protein) [MASS=9081]                                                                                                                                    | 0.51                     | 26.19 | 0.92 | 0.00 | 1 | 1 | 2 | QDTHPPSVIFC[330]LAGVGVPLPV              | 1 |
| IGS21_HUMAN (Q96ID5) Immunoglobulin superfamily member 21 precursor [MASS=51835]                                                                                                                                                                                               | 0.52                     | 6.64  | 0.73 | 0.00 | 1 | 2 | 2 | YQAQNFTLVC[330]IVSGGK                   | 1 |
|                                                                                                                                                                                                                                                                                |                          |       |      |      |   |   | 2 | C[330]TAQNPLGSTDHTR                     | 1 |
| IGS4B_HUMAN (Q8N126) Immunoglobulin superfamily member 4B precursor (Nectin-like protein 1) (TSLC1-like protein 1) (Synaptic cell adhesion molecule 3) (Brain immunoglobulin receptor) [MASS=43300]                                                                            | 1.00                     | 17.59 | 0.40 | 0.29 | 7 | 5 | 1 | LLLHC[330]EGR                           | 1 |
|                                                                                                                                                                                                                                                                                |                          |       |      |      |   |   | 3 | EKDTATLNC[339]QSSGSKPAAR                | 1 |
|                                                                                                                                                                                                                                                                                |                          |       |      |      |   |   | 2 | EDDGASIVC[330]SVNHESLK                  | 1 |
|                                                                                                                                                                                                                                                                                |                          |       |      |      |   |   | 2 | EKDTATLNC[330]QSSGSKPAAR                | 1 |
|                                                                                                                                                                                                                                                                                |                          |       |      |      |   |   | 2 | PIITGYKSSLR                             | 1 |
|                                                                                                                                                                                                                                                                                |                          |       |      |      |   |   | 2 | EKDTATLNC[330]QSSGSK                    | 1 |
|                                                                                                                                                                                                                                                                                |                          |       |      |      |   |   | 2 | EDDGASIVC[339]SVNHESLK                  | 1 |
| 2                                                                                                                                                                                                                                                                              | LLLHC[330]EGR            | 1     |      |      |   |   |   |                                         |   |
| 3                                                                                                                                                                                                                                                                              | EKDTATLNC[330]QSSGSKPAAR | 1     |      |      |   |   |   |                                         |   |
| IGSF8_HUMAN (Q969P0) Immunoglobulin superfamily member 8 precursor (CD81 partner 3) (Glu-Trp-Ile EWI motif-containing protein 2) (EWI-2) (Keratinocytes-associated transmembrane protein 4) (KCT-4) (LIR-D1) (CD316 antigen) [MASS=65034]                                      | 0.84                     | 8.32  | 0.64 | 0.00 | 1 | 3 | 2 | LGKEGTDR                                | 1 |
|                                                                                                                                                                                                                                                                                |                          |       |      |      |   |   | 3 | LQAQDAGIYEC[330]HTPSTDTR                | 1 |
|                                                                                                                                                                                                                                                                                |                          |       |      |      |   |   | 3 | AVLAHVVDVQTLSSQLAVTVGPGER               | 1 |
| IKAP_HUMAN (O95163) I kappa B kinase complex-associated protein (IKK complex-associated protein) (p150) [MASS=150190]                                                                                                                                                          | 0.00                     | 4.73  | 2.36 | 0.00 | 1 | 3 | 2 | GDGQFFAVSVVC[339]PETGAR                 | 1 |
|                                                                                                                                                                                                                                                                                |                          |       |      |      |   |   | 3 | LMFKEAFEC[339]MR                        | 1 |
|                                                                                                                                                                                                                                                                                |                          |       |      |      |   |   | 3 | NGLLHGHTLPLFLKDEVKVNLLWNADSSVLAVR       | 1 |
| IKKA_HUMAN (O15111) Inhibitor of nuclear factor kappa-B kinase alpha subunit (EC 2.7.11.10) (I kappa-B kinase alpha) (IkbKA) (IKK-alpha) (IKK-A) (I kappa B kinase) (I-kappa-B kinase 1) (IKK1) (Conserved helix-loop-helix ubiquitous kinase) (Nuclear factor N) [MASS=84653] | *                        | 2.28  | *    | *    | * | 1 | 3 | PFLHHLQPFTWHEKIKK                       | 1 |

|                                                                                                                                                                                                                                                                             |      |       |      |      |   |   |   |                                        |   |
|-----------------------------------------------------------------------------------------------------------------------------------------------------------------------------------------------------------------------------------------------------------------------------|------|-------|------|------|---|---|---|----------------------------------------|---|
| IL1R1_HUMAN (P14778) Interleukin-1 receptor type I precursor (IL-1R-1) (IL-1RT1) (IL-1R-alpha) (p80) (CD121a antigen) [MASS=65402]                                                                                                                                          | *    | 8.96  | *    | *    | * | 3 | 2 | LIC[330]FIALLISSLEADKC[330]K           | 1 |
|                                                                                                                                                                                                                                                                             |      |       |      |      |   |   | 2 | WNGSVIDEEDDPVLGEDYYSVENPANK            | 1 |
|                                                                                                                                                                                                                                                                             |      |       |      |      |   |   | 1 | LIIILVR                                | 1 |
| IL2_HUMAN (P60568) Interleukin-2 precursor (IL-2) (T-cell growth factor) (TCGF) (Aldesleukin) [MASS=17628]                                                                                                                                                                  | *    | 17.65 | *    | *    | * | 1 | 3 | HLQC[330]LEEELKPLEEVLNLAQSKNFHLR       | 1 |
| IL8_HUMAN (P10145) Interleukin-8 precursor (IL-8) (CXCL8) (Monocyte-derived neutrophil chemotactic factor) (MDNCF) (T-cell chemotactic factor) (Neutrophil-activating protein 1) (NAP-1) (Protein 3-10C) (Granulocyte chemotactic protein 1) (GCP-1) (Monocyte [MASS=11098] | *    | 28.28 | *    | *    | * | 1 | 3 | VIESGPHC[330]ANTEIIVKLSDGRELC[330]LDPK | 1 |
| IMB1_HUMAN (Q14974) Importin beta-1 subunit (Karyopherin beta-1 subunit) (Nuclear factor P97) (Importin 90) [MASS=97170]                                                                                                                                                    | *    | 3.65  | *    | *    | * | 1 | 2 | MFQSTAGSGGVQEDALMAVSTLVEVLGGEFLK       | 1 |
| IMB3_HUMAN (O00410) Importin beta-3 (Karyopherin beta-3) (Ran-binding protein 5) (RanBP5) [MASS=123498]                                                                                                                                                                     | 0.00 | 7.03  | 1.74 | 0.00 | 1 | 4 | 3 | LVLPM[147]IKEHIM[147]QM[147]LQNPDWKYR  | 1 |
|                                                                                                                                                                                                                                                                             |      |       |      |      |   |   | 2 | RM[147]LVQC[339]M[147]QDQEHPSIR        | 1 |
|                                                                                                                                                                                                                                                                             |      |       |      |      |   |   | 3 | KFHEKVIAALLQTMEDQGNQR                  | 1 |
|                                                                                                                                                                                                                                                                             |      |       |      |      |   |   | 3 | GPEYLTQMWHFMC[339]DALIK                | 1 |
| IMMT_HUMAN (Q16891) Mitochondrial inner membrane protein (Mitofilin) (p87/89) (Proliferation-inducing gene 4 protein) [MASS=83677]                                                                                                                                          | *    | 4.09  | *    | *    | * | 2 | 2 | IAGAGLLFVGGGIGGTILYAK                  | 1 |
|                                                                                                                                                                                                                                                                             |      |       |      |      |   |   | 2 | ELAEQKATEK                             | 1 |
| INADL_HUMAN (Q8NI35) InaD-like protein (Inadl protein) (hINADL) (Pals1-associated tight junction protein) (Protein associated to tight junctions) [MASS=196385]                                                                                                             | *    | 1.44  | *    | *    | * | 1 | 2 | TGDKILEVSGVDLQNASHEAVEAIK              | 1 |
| INP5E_HUMAN (Q9NRR6) 72 kDa inositol polyphosphate 5-phosphatase (EC 3.1.3.36) (Phosphatidylinositol-4,5-bisphosphate 5-phosphatase) (Phosphatidylinositol polyphosphate 5-phosphatase type IV) [MASS=70150]                                                                | 0.00 | 3.73  | 0.27 | 0.00 | 1 | 1 | 3 | SPLAC[330]DDC[330]SLRSAKSSFSLLAPIR     | 1 |
| IP3KA_HUMAN (P23677) Inositol-trisphosphate 3-kinase A (EC 2.7.1.127) (Inositol 1,4,5-trisphosphate 3-kinase A) (IP3K A) (IP3 3-kinase A) [MASS=51008]                                                                                                                      | 0.47 | 3.69  | 1.12 | 0.00 | 1 | 1 | 3 | ERDC[339]LPAAGSSHLQQR                  | 1 |

|                                                                                                                                                                                                                     |      |      |      |      |   |   |   |                                                                           |        |
|---------------------------------------------------------------------------------------------------------------------------------------------------------------------------------------------------------------------|------|------|------|------|---|---|---|---------------------------------------------------------------------------|--------|
| IP3KB_HUMAN (P27987) Inositol-trisphosphate 3-kinase B (EC 2.7.1.127) (Inositol 1,4,5-trisphosphate 3-kinase B) (IP3K B) (IP3 3-kinase B) (IP3K-B) [MASS=102376]                                                    | *    | 5.39 | *    | *    | * | 2 | 3 | ILQRELQNVQVNQKVGGM[147]FEAHIQAQSSAIQAPR<br>QQVVAAGTSLPPGPEEAK             | 1<br>1 |
| IPO7_HUMAN (O95373) Importin-7 (Imp7) (Ran-binding protein 7) (RanBP7) [MASS=119516]                                                                                                                                | *    | 2.89 | *    | *    | * | 1 | 3 | SLNFVSTLLQITMSEQLDLPVRQAGVIYLK                                            | 1      |
| IPO9_HUMAN (Q96P70) Importin-9 (Imp9) (Ran-binding protein 9) (RanbP9) [MASS=115831]                                                                                                                                | 0.90 | 1.73 | 0.25 | 0.00 | 1 | 1 | 3 | IPAGLC[330]ATAIDILTTVVR                                                   | 1      |
| IQEC2_HUMAN (Q5JU85) IQ motif and Sec7 domain-containing protein 2 [MASS=161735]                                                                                                                                    | *    | 1.83 | *    | *    | * | 2 | 2 | TIQTAFRQYRMNK<br>M[147]IVGKKPVLSLPHR                                      | 1<br>1 |
| IQEC3_HUMAN (Q9UPP2) IQ motif and Sec7 domain-containing protein 3 [MASS=127596]                                                                                                                                    | 0.00 | 4.23 | 0.99 | 0.00 | 1 | 2 | 3 | DVLDC[330]VVDEM[147]DFSSM[147]ELDEALRKFAQHIR<br>QQGTKLSFKPC[339]GAQGDPQSK | 1<br>1 |
| IRAK2_HUMAN (O43187) Interleukin-1 receptor-associated kinase-like 2 (IRAK-2) [MASS=65270]                                                                                                                          | *    | 3.39 | *    | *    | * | 1 | 2 | PAPEIRC[339]PIPAFPDSVKPEK                                                 | 1      |
| IRX4_HUMAN (P78413) Iroquois-class homeodomain protein IRX-4 (Iroquois homeobox protein 4) (Homeodomain protein IRXA3) [MASS=54445]                                                                                 | 0.00 | 7.13 | 1.52 | 0.00 | 1 | 2 | 3 | IWSLAHTATAAAAAATSLSQTEFPSC[339]M[147]LK<br>MTWPPRNK                       | 1<br>1 |
| ISL1_HUMAN (P61371) Insulin gene enhancer protein ISL-1 (Islet-1) [MASS=39036]                                                                                                                                      | 0.00 | 9.74 | 2.22 | 0.00 | 1 | 2 | 2 | LYGIKC[339]AK<br>TC[330]YAANPRPDALM[147]KEQLVEM[147]TGLSPR                | 1<br>1 |
| ITA5_HUMAN (P08648) Integrin alpha-5 precursor (Fibronectin receptor subunit alpha) (Integrin alpha-F) (VLA-5) (CD49e antigen) [Contains: Integrin alpha-5 heavy chain; Integrin alpha-5 light chain] [MASS=114536] | 0.00 | 4.67 | 0.85 | 0.00 | 1 | 2 | 2 | EPLSDPVGTC[339]YLSTDNFTR<br>3                                             | 1<br>1 |
| ITAX_HUMAN (P20702) Integrin alpha-X precursor (Leukocyte adhesion glycoprotein p150,95 alpha chain) (Leukocyte adhesion receptor p150,95) (Leu M5) (CD11c antigen) [MASS=127886]                                   | 0.00 | 1.55 | 0.94 | 0.00 | 1 | 1 | 2 | RWWC[330]DAVLYGEQGHWPGR                                                   | 1      |
| ITB7_HUMAN (P26010) Integrin beta-7 precursor [MASS=86903]                                                                                                                                                          | *    | 0.88 | *    | *    | * | 1 | 2 | EGKAEDR                                                                   | 1      |

|                                                                                                                                                                                                                                                                 |      |       |      |      |   |   |   |                                                          |   |
|-----------------------------------------------------------------------------------------------------------------------------------------------------------------------------------------------------------------------------------------------------------------|------|-------|------|------|---|---|---|----------------------------------------------------------|---|
| ITB8_HUMAN (P26012) Integrin beta-8 precursor [MASS=85632]                                                                                                                                                                                                      | 0.00 | 8.58  | 6.56 | 0.00 | 1 | 4 | 2 | KYPVDLYYLVDVSASMHNIEK                                    | 1 |
|                                                                                                                                                                                                                                                                 |      |       |      |      |   |   | 3 | GQVC[330]SGRGTG[330]VC[339]GRC[330]EC[339]TDPR           | 1 |
|                                                                                                                                                                                                                                                                 |      |       |      |      |   |   | 2 | VLIIHQVILQWNSNK                                          | 1 |
|                                                                                                                                                                                                                                                                 |      |       |      |      |   |   | 2 | KC[339]DVTGGK                                            | 1 |
| ITBP1_HUMAN (O14713) Integrin beta-1-binding protein 1 (Integrin cytoplasmic domain-associated protein 1) (ICAP-1) [MASS=21782]                                                                                                                                 | *    | 7.50  | *    | *    | * | 1 | 3 | RHSSSSSQSSEISTK                                          | 1 |
| ITIH1_HUMAN (P19827) Inter-alpha-trypsin inhibitor heavy chain H1 precursor (ITI heavy chain H1) (Inter-alpha-inhibitor heavy chain 1) (Inter-alpha-trypsin inhibitor complex component III) (Serum-derived hyaluronan-associated protein) (SHAP) [MASS=101388] | *    | 4.72  | *    | *    | * | 2 | 2 | RNHM[147]QYEIVIKVK                                       | 1 |
|                                                                                                                                                                                                                                                                 |      |       |      |      |   |   | 3 | QSSFKADVQAHGEGQEFSITC[339]LVDEEEM[147]KK                 | 1 |
|                                                                                                                                                                                                                                                                 |      |       |      |      |   |   |   |                                                          |   |
| ITLN2_HUMAN (Q8WWU7) Intelectin-2 precursor (Endothelial lectin HL-2) [MASS=36211]                                                                                                                                                                              | 0.00 | 14.77 | 0.76 | 0.00 | 1 | 2 | 2 | NGVVYQTF[330]DMTSGGGGWTLVASVHENDMRGK                     | 1 |
|                                                                                                                                                                                                                                                                 |      |       |      |      |   |   | 2 | ERC[339]HSAGDGLYFLRTK                                    | 1 |
| IVD_HUMAN (P26440) Isovaleryl-CoA dehydrogenase, mitochondrial precursor (EC 1.3.99.10) (IVD) [MASS=46319]                                                                                                                                                      | *    | 11.11 | *    | *    | * | 2 | 3 | LVLAGGPLGLM[147]QAVLDHTIPYLHVR                           | 1 |
|                                                                                                                                                                                                                                                                 |      |       |      |      |   |   | 3 | IGHFQLM[147]QGKM[147]ADMYTRLMAC[339]R                    | 1 |
| JAD1A_HUMAN (P29375) Jumonji/ARID domain-containing protein 1A (Retinoblastoma-binding protein 2) (RBBP-2) [MASS=195815]                                                                                                                                        | 0.00 | 2.85  | 0.49 | 0.00 | 1 | 2 | 3 | M[147]AADPEC[339]LDVGLAAM[147]VC[339]KELTLM[147]TEEETRLR | 1 |
|                                                                                                                                                                                                                                                                 |      |       |      |      |   |   | 3 | M[147]AADPEC[330]LDVGLAAM[147]VC[330]K                   | 1 |
| JAG1_HUMAN (P78504) Jagged-1 precursor (Jagged1) (hJ1) (CD339 antigen) [MASS=133798]                                                                                                                                                                            | *    | 2.71  | *    | *    | * | 3 | 2 | TC[330]QLDANEC[330]EAK                                   | 1 |
|                                                                                                                                                                                                                                                                 |      |       |      |      |   |   | 1 | NSKM[147]SK                                              | 1 |
|                                                                                                                                                                                                                                                                 |      |       |      |      |   |   | 3 | C[339]KSQSGGKFTC[330]DC[339]NK                           | 1 |
| JHD1A_HUMAN (Q9Y2K7) JmjC domain-containing histone demethylation protein 1A (EC 1.14.11.-) (F-box/LRR-repeat protein 11) (F-box and leucine-rich repeat protein 11) (F-box protein FBL7) (F-box protein Lilina) [MASS=132792]                                  | 0.00 | 10.93 | 0.81 | 0.00 | 1 | 6 | 2 | LQAITASSANLR                                             | 1 |
|                                                                                                                                                                                                                                                                 |      |       |      |      |   |   | 2 | YSLTELNM[147]AGC[339]NKLTQTLIYLRR                        | 1 |
|                                                                                                                                                                                                                                                                 |      |       |      |      |   |   | 3 | LDLSHC[330]SHLTDQSSNLLTAVGSSTR                           | 1 |
|                                                                                                                                                                                                                                                                 |      |       |      |      |   |   | 2 | M[147]KQSC[339]VLRQC[330]LAPR                            | 1 |
|                                                                                                                                                                                                                                                                 |      |       |      |      |   |   | 2 | NSDGLGIKMPDPDFTVNDVKM[147]C[339]VGSR                     | 1 |
|                                                                                                                                                                                                                                                                 |      |       |      |      |   |   | 3 | DPLIFKNSDGLGIKMPDPDFTVNDVK                               | 1 |
| JOS1_HUMAN (Q15040) Josephin-1 (Josephin domain-containing 1) [MASS=23198]                                                                                                                                                                                      | *    | 15.84 | *    | *    | * | 1 | 3 | LSPNTM[147]VTPHKSM[147]LGNGNYDVNVIM[147]AALQTK           | 1 |
| K0056_HUMAN (P42695) Protein KIAA0056 [MASS=168890]                                                                                                                                                                                                             | 0.00 | 4.61  | 0.29 | 0.00 | 1 | 4 | 3 | YIFTLGDIAQLC[330]PAR                                     | 1 |
|                                                                                                                                                                                                                                                                 |      |       |      |      |   |   | 3 | GLGSLQPWC[330]PLDLR                                      | 1 |
|                                                                                                                                                                                                                                                                 |      |       |      |      |   |   | 3 | LPC[330]GEYAM[147]FIAWLKYSRSSK                           | 1 |
|                                                                                                                                                                                                                                                                 |      |       |      |      |   |   | 2 | DFFAVDKQLASELEYDM[147]K                                  | 1 |

|                                                                                                                                                                                                  |      |      |        |      |   |   |   |                                          |   |
|--------------------------------------------------------------------------------------------------------------------------------------------------------------------------------------------------|------|------|--------|------|---|---|---|------------------------------------------|---|
|                                                                                                                                                                                                  |      |      |        |      |   |   | 2 | ITDPKMTTC[330]HIDQLNTWYDM[147]K          | 1 |
|                                                                                                                                                                                                  |      |      |        |      |   |   | 2 | NLGMVC[339]R                             | 7 |
| K0196_HUMAN (Q12768) Protein KIAA0196 [MASS=134286]                                                                                                                                              | 0.00 | 4.31 | 238.64 | 0.00 | 1 | 3 |   |                                          |   |
|                                                                                                                                                                                                  |      |      |        |      |   |   | 2 | EEM[147]VLDNIPKLLNC[330]LRDC[339]NVAIR   | 1 |
| K0232_HUMAN (Q92628) Protein KIAA0232 (Fragment) [MASS=155619]                                                                                                                                   | 0.00 | 4.14 | 1.78   | 0.00 | 1 | 3 | 2 | C[339]SDLTLEEMKKQAAVQC[339]LR            | 1 |
|                                                                                                                                                                                                  |      |      |        |      |   |   | 2 | IC[330]GVDRTQYRAIR                       | 1 |
|                                                                                                                                                                                                  |      |      |        |      |   |   | 3 | GESGLEEYPDAKETPSNEERLLDFNR               | 1 |
| K0427_HUMAN (O43310) Protein KIAA0427 [MASS=67586]                                                                                                                                               | 0.00 | 8.70 | 0.98   | 0.00 | 1 | 3 | 3 | WHHGNM[147]KHPPGDKGEAGAHR                | 1 |
|                                                                                                                                                                                                  |      |      |        |      |   |   | 2 | WHHGNM[147]KHPPGDKGEAGAHR                | 1 |
|                                                                                                                                                                                                  |      |      |        |      |   |   | 3 | MALFM[147]VEGTKFRSLLLNLQK                | 1 |
|                                                                                                                                                                                                  |      |      |        |      |   |   | 2 | M[147]LC[339]PSESM[147]LTR               | 1 |
| K0552_HUMAN (O60299) Protein KIAA0552 [MASS=71790]                                                                                                                                               | 0.00 | 9.66 | 1.33   | 0.00 | 1 | 3 | 3 | EKVIEYQKQLQLSYVEMYQR                     | 1 |
|                                                                                                                                                                                                  |      |      |        |      |   |   | 2 | ASSKSGSSSSM[147]GR                       | 1 |
|                                                                                                                                                                                                  |      |      |        |      |   |   | 3 | NFHSM[147]QNLC[339]PPQTNGTPEGRQGPGLKGLDK | 1 |
| K0690_HUMAN (Q5JTH9) Protein KIAA0690 [MASS=143701]                                                                                                                                              | 0.00 | 5.63 | 0.57   | 0.00 | 1 | 4 | 2 | WVLSLC[330]LATLLRK                       | 1 |
|                                                                                                                                                                                                  |      |      |        |      |   |   | 2 | VTVC[330]QALRTLITKGC[330]QAEADR          | 1 |
|                                                                                                                                                                                                  |      |      |        |      |   |   | 2 | EIC[330]AVLAAVTEVIR                      | 1 |
|                                                                                                                                                                                                  |      |      |        |      |   |   | 3 | EC[330]VAPHM[147]ADIGSVTSSASGPAQSVAK     | 1 |
| K1024_HUMAN (Q9UPX6) UPF0258 protein KIAA1024 [MASS=102992]                                                                                                                                      | 0.00 | 7.64 | 17.18  | 0.00 | 1 | 4 | 2 | ETFISNEEPFVVQSC[339]VQKR                 | 1 |
|                                                                                                                                                                                                  |      |      |        |      |   |   | 2 | SDC[339]DSSPEHNLTKIANGVPNSK              | 1 |
|                                                                                                                                                                                                  |      |      |        |      |   |   | 3 | SDC[339]DSSPEHNLTKIANGVPNSK              | 1 |
|                                                                                                                                                                                                  |      |      |        |      |   |   | 3 | SVLFYTAC[339]LDPNFPATLFKDKM[147]K        | 1 |
|                                                                                                                                                                                                  |      |      |        |      |   |   | 1 | HEPVKK                                   | 1 |
| K1196_HUMAN (Q96KM6) Zinc finger protein KIAA1196 [MASS=97263]                                                                                                                                   | *    | 1.46 | *      | *    | * | 1 | 2 | HM[147]EVC[339]QKLQDALK                  | 1 |
| K1279_HUMAN (Q96EK5) Protein KIAA1279 [MASS=71814]                                                                                                                                               | 0.00 | 4.83 | 18.15  | 0.00 | 1 | 2 | 1 | INNLNK                                   | 1 |
|                                                                                                                                                                                                  |      |      |        |      |   |   | 3 | YC[339]LTLMQNAQLSMQDNIGELDLDK            | 1 |
| K2C5_HUMAN (P13647) Keratin, type II cytoskeletal 5 (Cytokeratin-5) (CK-5) (Keratin-5) (K5) (58 kDa cytokeratin) [MASS=62447]                                                                    | *    | 4.75 | *      | *    | * | 2 | 2 | NKLAEELEALQK                             | 1 |
|                                                                                                                                                                                                  |      |      |        |      |   |   | 2 | LDSELRNM[147]QDLVEDFK                    | 1 |
| K6PF_HUMAN (P08237) 6-phosphofructokinase, muscle type (EC 2.7.1.11) (Phosphofructokinase 1) (Phosphohexokinase) (Phosphofructo-1-kinase isozyme A) (PFK-A) (Phosphofructokinase-M) [MASS=85051] | *    | 4.24 | *      | *    | * | 1 | 3 | GITNLC[330]VIGGDGSLTGADTFRSEWSDLLSDLQK   | 1 |

|                                                                                                                                                                                                           |      |       |      |      |   |   |   |                                             |   |
|-----------------------------------------------------------------------------------------------------------------------------------------------------------------------------------------------------------|------|-------|------|------|---|---|---|---------------------------------------------|---|
| K6PL_HUMAN (P17858) 6-phosphofructokinase, liver type (EC 2.7.1.11) (Phosphofructokinase 1) (Phosphohexokinase) (Phosphofructo-1-kinase isozyme B) (PFK-B) [MASS=84917]                                   | *    | 7.45  | *    | *    | * | 3 | 3 | C[339]HDYYTTEFLYNLYSSEGKGVFDC[330]R         | 1 |
|                                                                                                                                                                                                           |      |       |      |      |   |   | 2 | GGSM[147]LGTKR                              | 1 |
|                                                                                                                                                                                                           |      |       |      |      |   |   | 3 | QANWLSVSNIIQLGGTIIGSARC[330]K               | 1 |
| K6PP_HUMAN (Q01813) 6-phosphofructokinase type C (EC 2.7.1.11) (Phosphofructokinase 1) (Phosphohexokinase) (Phosphofructo-1-kinase isozyme C) (PFK-C) (6-phosphofructokinase, platelet type) [MASS=85596] | *    | 6.63  | *    | *    | * | 2 | 3 | NVLGHMQGGGAPSPFDRNFGTKISAR                  | 1 |
|                                                                                                                                                                                                           |      |       |      |      |   |   | 3 | THSINALLIIGGFAYLGLLELSAAR                   | 3 |
| KAD4_HUMAN (P27144) Adenylate kinase isoenzyme 4, mitochondrial (EC 2.7.4.3) (Adenylate kinase 3-like 1) (ATP-AMP transphosphorylase) [MASS=25268]                                                        | 0.96 | 19.73 | 1.40 | 0.00 | 1 | 2 | 2 | ENIKASTEVGEMAK                              | 1 |
|                                                                                                                                                                                                           |      |       |      |      |   |   | 3 | TLGQAEALDKIC[339]EVDLVISLNIPFETLKDR         | 1 |
| KBL_HUMAN (O75600) 2-amino-3-ketobutyrate coenzyme A ligase, mitochondrial precursor (EC 2.3.1.29) (AKB ligase) (Glycine acetyltransferase) [MASS=45285]                                                  | *    | 6.68  | *    | *    | * | 1 | 3 | FRSKM[147]EAAGFTISGASHPIC[330]PVM[147]LGDAR | 1 |
| KBTB9_HUMAN (Q96CT2) Kelch repeat and BTB domain-containing protein 9 [MASS=71468]                                                                                                                        | *    | 2.60  | *    | *    | * | 1 | 3 | YHMLPHARQEM[147]QTPRTR                      | 1 |
| KC1AL_HUMAN (Q8N752) Casein kinase I isoform alpha-like (EC 2.7.11.1) (CKI-alpha-like) (CK1) [MASS=39072]                                                                                                 | 0.00 | 9.50  | *    | *    | * | 2 | 3 | TLNHQYDYTFDWTMLKQK                          | 1 |
|                                                                                                                                                                                                           |      |       |      |      |   |   | 2 | GFPAEFAMYLNYC[339]R                         | 1 |
| KC1A_HUMAN                                                                                                                                                                                                | 0.00 | 5.34  | 2.03 | 0.00 | 1 | 1 | 2 | M[147]ASSSGSKAEFIVGGKYK                     | 1 |

|                                                                                                                                                                               |      |       |      |      |    |   |  |   |                                           |   |
|-------------------------------------------------------------------------------------------------------------------------------------------------------------------------------|------|-------|------|------|----|---|--|---|-------------------------------------------|---|
|                                                                                                                                                                               |      |       |      |      |    |   |  | 3 | MC[330]DPGM[147]TAFEPEALGNLVEGLDFHR       | 2 |
|                                                                                                                                                                               |      |       |      |      |    |   |  | 2 | PENLLASKLKGAAVK                           | 1 |
|                                                                                                                                                                               |      |       |      |      |    |   |  | 3 | EYYSEADASHC[339]IQQILEAVLHC[339]HQMGGVVHR | 1 |
|                                                                                                                                                                               |      |       |      |      |    |   |  | 3 | NSKPVHTTILNPHIHLM[147]GDESAC[330]IAYIR    | 1 |
|                                                                                                                                                                               |      |       |      |      |    |   |  | 2 | QETVDC[330]LKK                            | 3 |
|                                                                                                                                                                               |      |       |      |      |    |   |  | 2 | STVASC[339]M[147]HR                       | 2 |
|                                                                                                                                                                               |      |       |      |      |    |   |  | 2 | QETVDC[339]LKK                            | 2 |
| KCC2A_HUMAN (Q9UQM7)                                                                                                                                                          |      |       |      |      |    |   |  | 2 | STVASC[330]MHR                            | 2 |
| Calcium/calmodulin-dependent protein kinase type II alpha chain (EC 2.7.11.17) (CaM-kinase II alpha chain) (CaM kinase II alpha subunit) (CaMK-II subunit alpha) [MASS=54029] | 1.00 | 32.43 | 0.68 | 0.15 | 21 | 8 |  | 3 | M[147]C[330]DPGMTAFEPEALGNLVEGLDFHR       | 1 |
|                                                                                                                                                                               |      |       |      |      |    |   |  | 2 | STVASC[330]M[147]HR                       | 3 |
|                                                                                                                                                                               |      |       |      |      |    |   |  | 2 | MC[330]DPGM[147]TAFEPEALGNLVEGLDFHR       | 1 |
|                                                                                                                                                                               |      |       |      |      |    |   |  | 2 | M[147]C[330]DPGM[147]TAFEPEALGNLVEGLDFHR  | 1 |
|                                                                                                                                                                               |      |       |      |      |    |   |  | 3 | M[147]C[330]DPGM[147]TAFEPEALGNLVEGLDFHR  | 1 |
|                                                                                                                                                                               |      |       |      |      |    |   |  | 3 | LKGAILTTMLATR                             | 1 |
|                                                                                                                                                                               |      |       |      |      |    |   |  | 3 | LYQKIKAGAYDFPSPEWDTVTPEAK                 | 1 |
|                                                                                                                                                                               |      |       |      |      |    |   |  | 2 | STVASC[339]MHR                            | 2 |
|                                                                                                                                                                               |      |       |      |      |    |   |  | 2 | M[147]C[339]DPGM[147]TAFEPEALGNLVEGLDFHR  | 1 |
|                                                                                                                                                                               |      |       |      |      |    |   |  | 3 | MC[330]DPGMTAFEPEALGNLVEGLDFHR            | 1 |
| KCC2B_HUMAN (Q13554)                                                                                                                                                          |      |       |      |      |    |   |  | 2 | GTLPPAALEPQTTVIHNPVDGIK                   | 1 |
| Calcium/calmodulin-dependent protein kinase type II beta chain (EC 2.7.11.17) (CaM-kinase II beta chain) (CaM kinase II subunit beta) (CaMK-II subunit beta) [MASS=72726]     | 1.00 | 8.73  | 0.71 | 0.04 | 4  | 3 |  | 3 | IC[339]DPGLTSFEPEALGNLVEGM[147]DFHR       | 1 |
|                                                                                                                                                                               |      |       |      |      |    |   |  | 2 | LC[330]TGHEYAAK                           | 1 |
|                                                                                                                                                                               |      |       |      |      |    |   |  | 2 | LC[339]TGHEYAAK                           | 1 |
|                                                                                                                                                                               |      |       |      |      |    |   |  | 3 | IC[330]DPGLTSFEPEALGNLVEGM[147]DFHR       | 1 |
| KCC2D_HUMAN (Q13557)                                                                                                                                                          |      |       |      |      |    |   |  | 3 | IC[330]DPGLTAFEPEALGNLVEGM[147]DFHR       | 1 |
| Calcium/calmodulin-dependent protein kinase type II delta chain (EC 2.7.11.17) (CaM-kinase II delta chain) (CaM kinase II subunit delta) (CaMK-II subunit delta) [MASS=56297] | 0.89 | 8.42  | 0.80 | 0.00 | 1  | 2 |  | 3 | STVASM[147]M[147]HRQETVDC[330]LK          | 1 |



|                                                                                                                                                                                                                                                                               |                                       |      |      |      |   |   |   |                                  |   |                                                                                                      |                                       |       |
|-------------------------------------------------------------------------------------------------------------------------------------------------------------------------------------------------------------------------------------------------------------------------------|---------------------------------------|------|------|------|---|---|---|----------------------------------|---|------------------------------------------------------------------------------------------------------|---------------------------------------|-------|
| KCMA1_HUMAN (Q12791) Calcium-activated potassium channel subunit alpha 1 (Calcium-activated potassium channel, subfamily M subunit alpha 1) (Maxi K channel) (MaxiK) (BK channel) (K(VCA)alpha) (BKCA alpha) (KCa1.1) (Slowpoke homolog) (Slo homolog) (Slo-al [MASS=137559]) | 0.00                                  | 3.72 | 1.96 | 0.07 | 2 | 3 | 2 | HIVVC[339]GHITLESVSNFLK          | 1 |                                                                                                      |                                       |       |
|                                                                                                                                                                                                                                                                               |                                       |      |      |      |   |   | 1 | TYNM[147]LC[330]FGIYR            | 1 |                                                                                                      |                                       |       |
|                                                                                                                                                                                                                                                                               |                                       |      |      |      |   |   | 2 | MDALIIPVTMEVPC[339]DSR           | 1 |                                                                                                      |                                       |       |
| KCNB2_HUMAN (Q92953) Potassium voltage-gated channel subfamily B member 2 (Voltage-gated potassium channel subunit Kv2.2) [MASS=102562]                                                                                                                                       | 0.00                                  | 5.82 | 0.08 | 0.00 | 1 | 3 | 2 | ENRGSAPQTPPSTAR                  | 1 |                                                                                                      |                                       |       |
|                                                                                                                                                                                                                                                                               |                                       |      |      |      |   |   | 3 | STLSLPPEPVDIIRSKTC[339]SR        | 1 |                                                                                                      |                                       |       |
|                                                                                                                                                                                                                                                                               |                                       |      |      |      |   |   | 2 | EEGSSVSSPQDTGHNC[330]R           | 1 |                                                                                                      |                                       |       |
| KCND2_HUMAN (Q9NZV8) Potassium voltage-gated channel subfamily D member 2 (Voltage-gated potassium channel subunit Kv4.2) [MASS=70536]                                                                                                                                        | *                                     | 3.02 | *    | *    | * | 1 | 3 | TPLSNSRSSLNAKMEEC[330]VK         | 1 |                                                                                                      |                                       |       |
| KCNG4_HUMAN (Q8TDN1) Potassium voltage-gated channel subfamily G member 4 (Voltage-gated potassium channel subunit Kv6.4) [MASS=58979]                                                                                                                                        | *                                     | 4.24 | *    | *    | * | 1 | 3 | WGLC[339]MNRLREM[147]VENPQSGPLGK | 1 |                                                                                                      |                                       |       |
|                                                                                                                                                                                                                                                                               |                                       |      |      |      |   |   |   |                                  |   | 3                                                                                                    | SKDYEFM[147]WNPFLGYILTC[339]PSNLGTGLR | 1     |
|                                                                                                                                                                                                                                                                               |                                       |      |      |      |   |   |   |                                  |   |                                                                                                      |                                       |       |
|                                                                                                                                                                                                                                                                               |                                       |      |      |      |   |   | 2 | FC[330]TGLTQIETLFK               | 4 |                                                                                                      |                                       |       |
|                                                                                                                                                                                                                                                                               |                                       |      |      |      |   |   |   |                                  |   | KCRB_HUMAN (P12277) Creatine kinase B-type (EC 2.7.3.2) (Creatine kinase B chain) (BCK) [MASS=42644] | 1.00                                  | 23.88 |
| 2                                                                                                                                                                                                                                                                             | GFC[330]LPPHC[330]SR                  | 1    |      |      |   |   |   |                                  |   |                                                                                                      |                                       |       |
| 3                                                                                                                                                                                                                                                                             | SKDYEFM[147]WNPFLGYILTC[330]PSNLGTGLR | 2    |      |      |   |   |   |                                  |   |                                                                                                      |                                       |       |
|                                                                                                                                                                                                                                                                               |                                       |      |      |      |   |   | 3 | LGFSEVELVQMVVDGVKLLIEMEQR        | 1 |                                                                                                      |                                       |       |
|                                                                                                                                                                                                                                                                               |                                       |      |      |      |   |   |   |                                  |   | 3                                                                                                    | LAVEALSSLDGDLAGR                      | 1     |
|                                                                                                                                                                                                                                                                               |                                       |      |      |      |   |   |   |                                  |   |                                                                                                      |                                       |       |

|                                                                                                                                                                 |      |       |      |      |    |   |   |                                            |   |
|-----------------------------------------------------------------------------------------------------------------------------------------------------------------|------|-------|------|------|----|---|---|--------------------------------------------|---|
| KCRS_HUMAN (P17540) Creatine kinase, sarcomeric mitochondrial precursor (EC 2.7.3.2) (S-MtCK) (Mib-CK) (Basic-type mitochondrial creatine kinase) [MASS=47520]  | 0.00 | 19.33 | 2.03 | 0.01 | 2  | 4 | 3 | LGYILTC[330]PSNLGTGLRAGVHVRIPK             | 1 |
|                                                                                                                                                                 |      |       |      |      |    |   | 3 | LIDDHFLFDKPVSPLLTC[339]AGM[147]AR          | 1 |
|                                                                                                                                                                 |      |       |      |      |    |   | 3 | LGYILTC[339]PSNLGTGLRAGVHVRIPK             | 1 |
|                                                                                                                                                                 |      |       |      |      |    |   | 2 | LGYILTC[330]PSNLGTGLR                      | 3 |
|                                                                                                                                                                 |      |       |      |      |    |   | 2 | LGYILTC[339]PSNLGTGLR                      | 2 |
|                                                                                                                                                                 |      |       |      |      |    |   | 2 | KHNNC[339]M[147]AEC[330]LTPAIYSK           | 1 |
| KCRU_HUMAN (P12532) Creatine kinase, ubiquitous mitochondrial precursor (EC 2.7.3.2) (U-MtCK) (Mia-CK) (Acidic-type mitochondrial creatine kinase) [MASS=47036] | 1.00 | 8.87  | 1.18 | 0.13 | 15 | 2 | 2 | HNNC[330]M[147]ASHLTPAVYAR                 | 1 |
|                                                                                                                                                                 |      |       |      |      |    |   | 2 | SEVELVQLVIDGVNYLIDC[330]JER                | 3 |
|                                                                                                                                                                 |      |       |      |      |    |   | 3 | HNNC[339]M[147]ASHLTPAVYAR                 | 1 |
|                                                                                                                                                                 |      |       |      |      |    |   | 2 | HNNC[330]MASHLTPAVYAR                      | 1 |
|                                                                                                                                                                 |      |       |      |      |    |   | 2 | HNNC[339]MASHLTPAVYAR                      | 1 |
|                                                                                                                                                                 |      |       |      |      |    |   | 3 | SEVELVQLVIDGVNYLIDC[330]JER                | 3 |
| KCTD5_HUMAN (Q9NXV2) Potassium channel tetramerization domain-containing protein 5 [MASS=26092]                                                                 | 0.00 | 21.37 | 0.87 | 0.00 | 1  | 2 | 2 | SEVELVQLVIDGVNYLIDC[339]JER                | 3 |
|                                                                                                                                                                 |      |       |      |      |    |   | 3 | SEVELVQLVIDGVNYLIDC[339]JER                | 2 |
|                                                                                                                                                                 |      |       |      |      |    |   | 3 | TSQVPVKHVYRVLQC[339]QEEELTQMVSTM[147]SDGWK | 1 |
| KGP1A_HUMAN (Q13976) cGMP-dependent protein kinase 1, alpha isozyme (EC 2.7.11.12) (CGK 1 alpha) (cGKI-alpha) [MASS=76233]                                      | 0.00 | 4.48  | *    | *    | *  | 1 | 2 | RC[339]SAGLGALAQRPGSVSK                    | 1 |
|                                                                                                                                                                 |      |       |      |      |    |   | 3 | GSFEDSTTRFYTAC[339]VVEAFAYLHSGIIYR         | 1 |
| KGP1B_HUMAN (P14619) cGMP-dependent protein kinase 1, beta isozyme (EC 2.7.11.12) (cGK 1 beta) (cGKI-beta) [MASS=77803]                                         | 0.00 | 2.77  | 1.26 | 0.00 | 1  | 1 | 2 | SPQSKDLIKEAILDNDFMK                        | 1 |
| KI13A_HUMAN (Q9H1H9) Kinesin-like protein KIF13A (Kinesin-like protein RBKIN) [MASS=202258]                                                                     | 0.00 | 4.60  | 0.93 | 0.00 | 1  | 3 | 2 | SLC[330]RTGSC[339]SELDAC[339]PSKISQPAR     | 1 |
|                                                                                                                                                                 |      |       |      |      |    |   | 3 | RGDPFYEAQENHNLIGVANVFLEC[330]LFC[330]DVK   | 1 |
|                                                                                                                                                                 |      |       |      |      |    |   | 3 | LQRGLDSYQRDEDEDGDDMDSYQEEDLNC[339]VR       | 1 |

|                                                                                                                                                                                                                              |      |      |      |      |   |   |                                                                                                       |                                           |      |      |      |   |   |                                                                          |                                |      |   |   |   |   |                                                                                        |                  |      |   |   |   |   |                                                                                                                                         |                |      |
|------------------------------------------------------------------------------------------------------------------------------------------------------------------------------------------------------------------------------|------|------|------|------|---|---|-------------------------------------------------------------------------------------------------------|-------------------------------------------|------|------|------|---|---|--------------------------------------------------------------------------|--------------------------------|------|---|---|---|---|----------------------------------------------------------------------------------------|------------------|------|---|---|---|---|-----------------------------------------------------------------------------------------------------------------------------------------|----------------|------|
| KI13B_HUMAN (Q9NQT8) Kinesin-like protein<br>KIF13B (Kinesin-like protein GAKIN)<br>[MASS=202665]                                                                                                                            | *    | 5.37 | *    | *    | * | 5 | 2                                                                                                     | VILNPVNTNLSKGDARGQPK                      | 1    |      |      |   |   |                                                                          |                                |      |   |   |   |   |                                                                                        |                  |      |   |   |   |   |                                                                                                                                         |                |      |
|                                                                                                                                                                                                                              |      |      |      |      |   |   | 3                                                                                                     | QHDGEVKAEASWDSAVHGC[339]PQLSR             | 1    |      |      |   |   |                                                                          |                                |      |   |   |   |   |                                                                                        |                  |      |   |   |   |   |                                                                                                                                         |                |      |
|                                                                                                                                                                                                                              |      |      |      |      |   |   | 1                                                                                                     | STGLRLGAPEAR                              | 1    |      |      |   |   |                                                                          |                                |      |   |   |   |   |                                                                                        |                  |      |   |   |   |   |                                                                                                                                         |                |      |
|                                                                                                                                                                                                                              |      |      |      |      |   |   | 2                                                                                                     | C[330]FAYDHC[330]FWSM[147]DESVKEK         | 1    |      |      |   |   |                                                                          |                                |      |   |   |   |   |                                                                                        |                  |      |   |   |   |   |                                                                                                                                         |                |      |
|                                                                                                                                                                                                                              |      |      |      |      |   |   | 3                                                                                                     | SYTM[147]M[147]GTADQPGLIPRLC[339]SGLFER   | 1    |      |      |   |   |                                                                          |                                |      |   |   |   |   |                                                                                        |                  |      |   |   |   |   |                                                                                                                                         |                |      |
| KI67_HUMAN (P46013) Antigen KI-67<br>[MASS=358743]                                                                                                                                                                           | 0.00 | 5.53 | 0.66 | 0.00 | 1 | 9 | 3                                                                                                     | AQPLEDLAGLKELFQTPVC[339]TDKPTTHEK         | 1    |      |      |   |   |                                                                          |                                |      |   |   |   |   |                                                                                        |                  |      |   |   |   |   |                                                                                                                                         |                |      |
|                                                                                                                                                                                                                              |      |      |      |      |   |   | 2                                                                                                     | TPSVGKAM[147]DTPK                         | 1    |      |      |   |   |                                                                          |                                |      |   |   |   |   |                                                                                        |                  |      |   |   |   |   |                                                                                                                                         |                |      |
|                                                                                                                                                                                                                              |      |      |      |      |   |   | 3                                                                                                     | SPQPESFKTSRSSK                            | 1    |      |      |   |   |                                                                          |                                |      |   |   |   |   |                                                                                        |                  |      |   |   |   |   |                                                                                                                                         |                |      |
|                                                                                                                                                                                                                              |      |      |      |      |   |   | 2                                                                                                     | IAC[330]KSPPPESM[147]DTPSTRR              | 1    |      |      |   |   |                                                                          |                                |      |   |   |   |   |                                                                                        |                  |      |   |   |   |   |                                                                                                                                         |                |      |
|                                                                                                                                                                                                                              |      |      |      |      |   |   | 3                                                                                                     | ELFQTPGHTEESM[147]TDDKITEVSC[339]KSPQDPVK | 1    |      |      |   |   |                                                                          |                                |      |   |   |   |   |                                                                                        |                  |      |   |   |   |   |                                                                                                                                         |                |      |
| KIF11_HUMAN (P52732) Kinesin-like protein<br>KIF11 (Kinesin-related motor protein Eg5)<br>(Kinesin-like spindle protein HKSP) (Thyroid<br>receptor-interacting protein 5) (TRIP5) (Kinesin-<br>like protein 1) [MASS=119273] | *    | 0.95 | *    | *    | * | 1 | 2                                                                                                     | TPHVPYRESK                                | 1    |      |      |   |   |                                                                          |                                |      |   |   |   |   |                                                                                        |                  |      |   |   |   |   |                                                                                                                                         |                |      |
|                                                                                                                                                                                                                              |      |      |      |      |   |   | KIF6_HUMAN (Q6ZMV9) Kinesin-like protein<br>KIF6 [MASS=92539]                                         | 0.00                                      | 2.46 | 1.34 | 0.00 | 1 | 1 | 2                                                                        | DSLGGNC[339]MTTM[147]IATLSLEKR | 1    |   |   |   |   |                                                                                        |                  |      |   |   |   |   |                                                                                                                                         |                |      |
|                                                                                                                                                                                                                              |      |      |      |      |   |   |                                                                                                       |                                           |      |      |      |   |   | KLD7B_HUMAN (Q96G42) Kelch domain-<br>containing protein 7B [MASS=53295] | *                              | 3.23 | * | * | * | 1 | 3                                                                                      | PGGWGVVEGPRKPSSR | 1    |   |   |   |   |                                                                                                                                         |                |      |
|                                                                                                                                                                                                                              |      |      |      |      |   |   |                                                                                                       |                                           |      |      |      |   |   |                                                                          |                                |      |   |   |   |   | KLF17_HUMAN (Q5JT82) Krueppel-like factor<br>17 (Zinc finger protein 393) [MASS=42577] | *                | 2.31 | * | * | * | 1 | 3                                                                                                                                       | HM[147]RVHTRYR | 1    |
|                                                                                                                                                                                                                              |      |      |      |      |   |   |                                                                                                       |                                           |      |      |      |   |   |                                                                          |                                |      |   |   |   |   |                                                                                        |                  |      |   |   |   |   | KLF4_HUMAN (O43474) Krueppel-like factor 4<br>(Epithelial zinc-finger protein EZF) (Gut-<br>enriched krueppel-like factor) [MASS=50078] | 0.00           | 6.60 |
| KNTC1_HUMAN (P50748) Kinetochore-<br>associated protein 1 (Rough deal homolog)<br>(hRod) (HsROD) (Rod) [MASS=250747]                                                                                                         | *    | 2.13 | *    | *    | * | 3 |                                                                                                       |                                           |      |      |      |   |   |                                                                          |                                |      |   |   |   |   |                                                                                        |                  |      |   |   |   |   |                                                                                                                                         |                |      |
|                                                                                                                                                                                                                              |      |      |      |      |   |   | 2                                                                                                     | RTYQNLVIEK                                | 1    |      |      |   |   |                                                                          |                                |      |   |   |   |   |                                                                                        |                  |      |   |   |   |   |                                                                                                                                         |                |      |
|                                                                                                                                                                                                                              |      |      |      |      |   |   | 2                                                                                                     | QC[339]QMDDC[339]GILMKASFGTHK             | 1    |      |      |   |   |                                                                          |                                |      |   |   |   |   |                                                                                        |                  |      |   |   |   |   |                                                                                                                                         |                |      |
|                                                                                                                                                                                                                              |      |      |      |      |   |   | KPCA_HUMAN (P17252) Protein kinase C<br>alpha type (EC 2.7.11.13) (PKC-alpha) (PKC-A)<br>[MASS=76632] | 0.69                                      | 4.32 | 0.45 | 0.00 | 1 | 2 | 3                                                                        | TTRNDFM[147]GSLSGVSELM[147]K   | 1    |   |   |   |   |                                                                                        |                  |      |   |   |   |   |                                                                                                                                         |                |      |
|                                                                                                                                                                                                                              |      |      |      |      |   |   |                                                                                                       |                                           |      |      |      |   |   | 2                                                                        | C[330]DTC[330]DM[147]NVHK      | 1    |   |   |   |   |                                                                                        |                  |      |   |   |   |   |                                                                                                                                         |                |      |
| KPCD_HUMAN (Q05655) Protein kinase C<br>delta type (EC 2.7.11.13) (nPKC-delta)<br>[MASS=77477]                                                                                                                               | 0.00 | 5.18 | 0.60 | 0.00 | 1 | 2 |                                                                                                       |                                           |      |      |      |   |   | 3                                                                        | EKVANLC[330]GINQK              | 1    |   |   |   |   |                                                                                        |                  |      |   |   |   |   |                                                                                                                                         |                |      |
|                                                                                                                                                                                                                              |      |      |      |      |   |   |                                                                                                       |                                           |      |      |      |   |   | 3                                                                        | FELYRATFYAAEIMC[330]GLQLHLSK   | 1    |   |   |   |   |                                                                                        |                  |      |   |   |   |   |                                                                                                                                         |                |      |

|                                                                                                                                                                                                  |      |       |      |      |   |   |   |                                        |   |
|--------------------------------------------------------------------------------------------------------------------------------------------------------------------------------------------------|------|-------|------|------|---|---|---|----------------------------------------|---|
| KPCE_HUMAN (Q02156) Protein kinase C epsilon type (EC 2.7.11.13) (nPKC-epsilon) [MASS=83673]                                                                                                     | *    | 7.46  | *    | *    | * | 3 | 3 | KQETPDQVGSQRFSVNMPHK                   | 1 |
|                                                                                                                                                                                                  |      |       |      |      |   |   | 2 | SAPTSPC[330]DQEIKELENNIR               | 1 |
|                                                                                                                                                                                                  |      |       |      |      |   |   | 2 | DLKLDNILLDAEGHC[330]JK                 | 1 |
| KPCG_HUMAN (P05129) Protein kinase C gamma type (EC 2.7.11.13) (PKC-gamma) [MASS=78447]                                                                                                          | 0.99 | 4.30  | 0.49 | 0.00 | 1 | 2 | 2 | DVIVQDDDDVDC[339]TLVEKR                | 1 |
|                                                                                                                                                                                                  |      |       |      |      |   |   | 2 | FEAC[330]NYPLELYER                     | 1 |
| KPYM_HUMAN (P14618) Pyruvate kinase isozymes M1/M2 (EC 2.7.1.40) (Pyruvate kinase muscle isozyme) (Cytosolic thyroid hormone-binding protein) (CTHBP) (THBP1) [MASS=57805]                       | 1.00 | 10.00 | 0.64 | 0.21 | 4 | 4 | 2 | GIFPVLC[330]JK                         | 1 |
|                                                                                                                                                                                                  |      |       |      |      |   |   | 2 | AGKPVIC[330]ATQM[147]LESMIK            | 1 |
|                                                                                                                                                                                                  |      |       |      |      |   |   | 2 | NTGIIC[330]TIGPASR                     | 1 |
|                                                                                                                                                                                                  |      |       |      |      |   |   | 2 | VNFAMNVGKARGFFK                        | 1 |
|                                                                                                                                                                                                  |      |       |      |      |   |   | 2 | AGKPVIC[330]ATQM[147]LESM[147]JK       | 1 |
| KR197_HUMAN (Q3SYF9) Keratin-associated protein 19-7 [MASS=6644]                                                                                                                                 | 0.00 | 19.05 | 5.80 | 0.00 | 1 | 1 | 2 | RLGYGC[339]GYGGYR                      | 1 |
| KREM2_HUMAN (Q8NCW0) Kremen protein 2 precursor (Kringle-containing protein marking the eye and the nose) (Kringle domain-containing transmembrane protein 2) (Dickkopf receptor 2) [MASS=48849] | *    | 5.41  | *    | *    | * | 2 | 1 | GHQNR                                  | 1 |
|                                                                                                                                                                                                  |      |       |      |      |   |   | 2 | VFSTVTAVSVLLLLLLGLLR                   | 1 |
| KRHB1_HUMAN (Q14533) Keratin, type II cuticular Hb1 (Hair keratin, type II Hb1) (ghHkb1) (ghHb1) (MLN 137) [MASS=54971]                                                                          | 0.00 | 4.75  | 0.78 | 0.00 | 1 | 2 | 2 | REAEC[330]VEADSGR                      | 1 |
|                                                                                                                                                                                                  |      |       |      |      |   |   | 2 | C[339]KLAELEGALQK                      | 1 |
| KRHB3_HUMAN (P78385) Keratin, type II cuticular Hb3 (Hair keratin, type II Hb3) [MASS=54214]                                                                                                     | 0.00 | 3.25  | *    | *    | * | 1 | 3 | PGNFSC[339]VSAC[339]GPRPSR             | 1 |
| KRIT1_HUMAN (O00522) Krev interaction trapped protein 1 (Krev interaction trapped 1) (Cerebral cavernous malformations 1 protein) [MASS=84347]                                                   | 0.00 | 4.08  | *    | *    | * | 2 | 1 | MLIALDK                                | 1 |
|                                                                                                                                                                                                  |      |       |      |      |   |   | 2 | YGC[339]FMWQLGDTDTC[330]FQIHSM[147]ENK | 1 |
| KSR2_HUMAN (Q6VAB6) Kinase suppressor of ras-2 (hKSR2) [MASS=93585]                                                                                                                              | 0.00 | 4.58  | 0.92 | 0.00 | 1 | 2 | 3 | MTDEQVC[339]ETVEKYGANREEC[330]AR       | 1 |
|                                                                                                                                                                                                  |      |       |      |      |   |   | 2 | IHSSVGSC[330]JENIPSQQR                 | 1 |
| KV1P_HUMAN (P01608) Ig kappa chain V-I region Roy [MASS=11782]                                                                                                                                   | 0.00 | 22.22 | 1.86 | 0.00 | 1 | 1 | 3 | VTITC[339]QASQDISIFLNWYQQKPGK          | 1 |
| L1CAM_HUMAN (P32004) Neural cell adhesion molecule L1 precursor (N-CAM L1) (CD171 antigen) [MASS=140002]                                                                                         | 0.99 | 3.50  | 0.40 | 0.00 | 1 | 4 | 2 | C[330]EASGKPEVQFR                      | 1 |
|                                                                                                                                                                                                  |      |       |      |      |   |   | 2 | LVVFPTDDISLKC[330]EASGK                | 1 |
|                                                                                                                                                                                                  |      |       |      |      |   |   | 1 | FQGIYR                                 | 1 |
|                                                                                                                                                                                                  |      |       |      |      |   |   | 1 | EPIDLRVK                               | 1 |

|                                                                                                                                                                                                                                                        |                                |       |      |      |   |   |   |                                           |   |
|--------------------------------------------------------------------------------------------------------------------------------------------------------------------------------------------------------------------------------------------------------|--------------------------------|-------|------|------|---|---|---|-------------------------------------------|---|
| LAMA2_HUMAN (P24043) Laminin alpha-2 chain precursor (Laminin M chain) (Merosin heavy chain) [MASS=342769]                                                                                                                                             | *                              | 3.63  | *    | *    | * | 6 | 3 | HLLSPQRAPERLIQLAEGNLNTLVTEMNELLTR         | 1 |
|                                                                                                                                                                                                                                                        |                                |       |      |      |   |   | 3 | TFSSSALLM[147]YLATRDRLRDFM[147]SVELTDGHIK | 1 |
|                                                                                                                                                                                                                                                        |                                |       |      |      |   |   | 3 | QFGLSRNSHIAIAFDDTKVK                      | 1 |
|                                                                                                                                                                                                                                                        |                                |       |      |      |   |   | 2 | C[330]SC[339]SDQTGQC[330]TC[339]K         | 1 |
|                                                                                                                                                                                                                                                        |                                |       |      |      |   |   | 2 | C[339]DGC[330]K                           | 1 |
|                                                                                                                                                                                                                                                        |                                |       |      |      |   |   | 2 | NEDPC[330]FGPC[339]IC[339]K               | 1 |
| LAMP1_HUMAN (P11279) Lysosome-associated membrane glycoprotein 1 precursor (LAMP-1) (CD107a antigen) [MASS=44773]                                                                                                                                      | 1.00                           | 7.93  | 0.74 | 0.31 | 2 | 2 | 2 | C[339]NAEEHVR                             | 1 |
|                                                                                                                                                                                                                                                        |                                |       |      |      |   |   | 2 | C[330]NAEEHVR                             | 1 |
|                                                                                                                                                                                                                                                        |                                |       |      |      |   |   | 3 | PLLLLLPVAAARPHALSSAAMFM[147]VK            | 1 |
| LANC1_HUMAN (O43813) LanC-like protein 1 (40 kDa erythrocyte membrane protein) (p40) [MASS=45283]                                                                                                                                                      | *                              | 5.51  | *    | *    | * | 1 | 2 | IPQSHIQQIC[339]ETILTSGENLAR               | 1 |
| LANC2_HUMAN (Q9NS86) LanC-like protein 2 (Testis-specific adriamycin sensitivity protein) [MASS=50854]                                                                                                                                                 | 0.99                           | 7.33  | 1.42 | 0.15 | 2 | 2 | 2 | LVHWC[339]HGAPGVIHM[147]LMQAYK            | 1 |
|                                                                                                                                                                                                                                                        |                                |       |      |      |   |   | 2 | LRSDC[330]ESQEC[330]VTK                   | 1 |
| LDH6A_HUMAN (Q6ZMR3) L-lactate dehydrogenase A-like 6A (EC 1.1.1.27) [MASS=36507]                                                                                                                                                                      | 0.00                           | 6.63  | *    | *    | * | 2 | 2 | VIGSGC[330]NLDSAR                         | 1 |
|                                                                                                                                                                                                                                                        |                                |       |      |      |   |   | 1 | DLNPDIGTDK                                | 1 |
| LDHA_HUMAN (P00338) L-lactate dehydrogenase A chain (EC 1.1.1.27) (LDH-A) (LDH muscle subunit) (LDH-M) (Proliferation-inducing gene 19 protein) (NY-REN-59 antigen) [MASS=36557]                                                                       | 0.00                           | 14.20 | *    | *    | * | 2 | 3 | VIGSGC[330]NLDSARFRYLMGER                 | 1 |
|                                                                                                                                                                                                                                                        |                                |       |      |      |   |   | 2 | GLYGIKDDVFLSVPC[339]ILGQNGISDLVK          | 1 |
| LDHB_HUMAN (P07195) L-lactate dehydrogenase B chain (EC 1.1.1.27) (LDH-B) (LDH heart subunit) (LDH-H) (NY-REN-46 antigen) [MASS=36507]                                                                                                                 | 1.00                           | 13.81 | 0.51 | 0.17 | 5 | 2 | 2 | GM[147]YGIENEVFLSLPC[339]ILNAR            | 1 |
|                                                                                                                                                                                                                                                        |                                |       |      |      |   |   | 3 | GM[147]YGIENEVFLSLPC[330]ILNAR            | 1 |
|                                                                                                                                                                                                                                                        |                                |       |      |      |   |   | 2 | LKGYTNWAIGLSVADLIESM[147]LKNLSR           | 1 |
|                                                                                                                                                                                                                                                        |                                |       |      |      |   |   | 3 | GMYGIENEVFLSLPC[330]ILNAR                 | 1 |
| 2                                                                                                                                                                                                                                                      | GM[147]YGIENEVFLSLPC[330]ILNAR | 1     |      |      |   |   |   |                                           |   |
| LDHC_HUMAN (P07864) L-lactate dehydrogenase C chain (EC 1.1.1.27) (LDH-C) (LDH testis subunit) (LDH-X) [MASS=36180]                                                                                                                                    | 0.00                           | 6.04  | *    | *    | * | 1 | 2 | ITIVGTGAVGM[147]AC[339]AISILLK            | 1 |
| LEG1_HUMAN (P09382) Galectin-1 (Lectin galactoside-binding soluble 1) (Beta-galactoside-binding lectin L-14-I) (Lactose-binding lectin 1) (S-Lac lectin 1) (Galaptin) (14 kDa lectin) (HPL) (HBL) (Putative MAPK-activating protein MP12) [MASS=14584] | 1.00                           | 11.19 | 0.45 | 0.12 | 2 | 1 | 2 | FNAHGDANTIVC[330]NSK                      | 1 |
|                                                                                                                                                                                                                                                        |                                |       |      |      |   |   | 2 | FNAHGDANTIVC[339]NSK                      | 1 |

|                                                                                                                                                                                                 |      |       |      |      |   |   |   |                                                            |        |
|-------------------------------------------------------------------------------------------------------------------------------------------------------------------------------------------------|------|-------|------|------|---|---|---|------------------------------------------------------------|--------|
| LETM1_HUMAN (O95202) Leucine zipper-EF-hand-containing transmembrane protein 1, mitochondrial precursor [MASS=83354]                                                                            | 0.99 | 5.95  | 1.05 | 0.00 | 1 | 2 | 3 | EEEITKEEIDILSDAC[330]SKLQEQK<br>LFEDELTLDNLTRPQLVALC[339]K | 1<br>1 |
| LNX2_HUMAN (Q8N448) Ligand of Numb-protein X 2 (Numb-binding protein 2) (PDZ domain-containing RING finger protein 1) [MASS=76004]                                                              | *    | 4.49  | *    | *    | * | 1 | 3 | C[330]GDM[147]IVAVNGLSTVGMSSHALVPMLKEQRNK                  | 1      |
| LPPRC_HUMAN (P42704) 130 kDa leucine-rich protein (LRP 130) (GP130) (Leucine-rich PPR motif-containing protein) [MASS=145200]                                                                   | *    | 2.44  | *    | *    | * | 2 | 3 | ALYEHLTAKNTKLDLFLK<br>C[339]VANNQVETLEK                    | 1<br>1 |
| LRC21_HUMAN (Q9P2V4) Leucine-rich repeat-containing protein 21 precursor (Photoreceptor-associated LRR superfamily protein) (Retina-specific protein PAL) [MASS=68040]                          | 0.00 | 7.06  | 0.70 | 0.00 | 1 | 2 | 2 | KC[330]QGPELHPGVASIRSLGSTALLR<br>C[339]ASPRSLAGVAFSQLELRK  | 1<br>1 |
| LRC27_HUMAN (Q9C0I9) Leucine-rich repeat-containing protein 27 [MASS=60089]                                                                                                                     | *    | 3.96  | *    | *    | * | 1 | 2 | LRQEIVEHVKADVLGDQLLTR                                      | 1      |
| LRC57_HUMAN (Q8N9N7) Leucine-rich repeat-containing protein 57 [MASS=26754]                                                                                                                     | 0.00 | 10.46 | 0.36 | 0.00 | 1 | 1 | 3 | LTVLPDEIC[330]NLKKLETLSLNNHLR                              | 1      |
| LRC59_HUMAN (Q96AG4) Leucine-rich repeat-containing protein 59 [MASS=34930]                                                                                                                     | 0.00 | 20.52 | 1.86 | 0.00 | 1 | 3 | 2 | LTTLPSEDFC[339]GLTHLVK                                     | 1      |
|                                                                                                                                                                                                 |      |       |      |      |   |   | 3 | LTTLPSEDFC[330]GLTHLVKLDLSKNK                              | 1      |
|                                                                                                                                                                                                 |      |       |      |      |   |   | 3 | WLDLKDNPDPVLAKVAGDC[339]LDEK                               | 1      |
| LRMP_HUMAN (Q12912) Lymphoid-restricted membrane protein (Protein Jaw1) [MASS=62092]                                                                                                            | 0.00 | 6.67  | 1.67 | 0.00 | 1 | 2 | 2 | HTSSTDGTITSSDPGLEILNMASC[339]DLDR<br>TRKPSLSEK             | 1<br>1 |
| LRP1_HUMAN (Q07954) Low-density lipoprotein receptor-related protein 1 precursor (LRP) (Alpha-2-macroglobulin receptor) (A2MR) (Apolipoprotein E receptor) (APOER) (CD91 antigen) [MASS=504573] | 0.25 | 1.94  | 1.99 | 0.00 | 1 | 5 | 3 | LDGTLRTLLAGDIEHPR                                          | 1      |
|                                                                                                                                                                                                 |      |       |      |      |   |   | 3 | C[330]LC[339]VEGYAPRGGDPHSC[339]K                          | 2      |
|                                                                                                                                                                                                 |      |       |      |      |   |   | 3 | SHAC[339]ENDQYGKPGGC[339]SDIC[339]LLANSHK                  | 1      |
|                                                                                                                                                                                                 |      |       |      |      |   |   | 2 | LERGVGGAPPTVTLLRSER                                        | 1      |
|                                                                                                                                                                                                 |      |       |      |      |   |   | 1 | SVIVDTK                                                    | 1      |

|                                                                                                                                                                                   |      |       |      |      |   |   |   |   |                                              |    |
|-----------------------------------------------------------------------------------------------------------------------------------------------------------------------------------|------|-------|------|------|---|---|---|---|----------------------------------------------|----|
|                                                                                                                                                                                   |      |       |      |      |   |   |   | 2 | IEYSTDFPVNLTGLDLSQNNLSSVTNINVKK              | 1  |
|                                                                                                                                                                                   |      |       |      |      |   |   |   | 1 | STSLKVK                                      | 12 |
| LRRN3_HUMAN (Q9H3W5) Leucine-rich repeats neuronal protein 3 precursor (Neuronal leucine-rich repeat protein 3) (NLRR-3) [MASS=79424]                                             | *    | 9.04  | *    | *    | * |   | 3 |   |                                              |    |
|                                                                                                                                                                                   |      |       |      |      |   |   |   | 3 | ELGINNM[147]PELISIDSLAVDNLPLRK               | 1  |
| LSAMP_HUMAN (Q13449) Limbic system-associated membrane protein precursor (LSAMP) [MASS=37308]                                                                                     | 1.00 | 20.41 | 0.93 | 0.08 | 2 | 3 |   | 3 | IQKVDVYDEGSYTC[330]SVQQTQHEPK                | 1  |
|                                                                                                                                                                                   |      |       |      |      |   |   |   | 3 | VDVYDEGSYTC[330]SVQQTQHEPK                   | 1  |
|                                                                                                                                                                                   |      |       |      |      |   |   |   | 3 | INGSISLAVPLWLLAASLLC[330]LLSKC[339]          | 1  |
| LTK_HUMAN (P29376) Leukocyte tyrosine kinase receptor precursor (EC 2.7.10.1) (Protein tyrosine kinase 1) [MASS=91653]                                                            | *    | 1.62  | *    | *    | * |   | 1 | 2 | GLQPQNLWNPTYRS                               | 1  |
| LY6H_HUMAN (O94772) Lymphocyte antigen Ly-6H precursor [MASS=14669]                                                                                                               | 0.99 | 9.29  | 0.83 | 0.00 | 2 | 1 |   | 2 | QC[330]QPSDTV[330]ASVR                       | 1  |
|                                                                                                                                                                                   |      |       |      |      |   |   |   | 2 | QC[339]QPSDTV[339]ASVR                       | 1  |
| M2GD_HUMAN (Q9UI17) Dimethylglycine dehydrogenase, mitochondrial precursor (EC 1.5.99.2) (ME2GLYDH) [MASS=96806]                                                                  | *    | 6.93  | *    | *    | * |   | 2 | 3 | RRLVC[330]LTLATDDVDPEGNESIWYNGK              | 1  |
|                                                                                                                                                                                   |      |       |      |      |   |   |   | 3 | VLAGLYNPGDGHIDPYSLTM[147]ALAAGARKC[330]GALLK | 1  |
| M2OM_HUMAN (Q02978) Mitochondrial 2-oxoglutarate/malate carrier protein (OGCP) (Solute carrier family 25 member 11) [MASS=33930]                                                  | 0.63 | 14.06 | 1.25 | 0.00 | 1 | 2 |   | 2 | GC[339]IPTM[147]AR                           | 1  |
|                                                                                                                                                                                   |      |       |      |      |   |   |   | 3 | AVIGM[147]TAGATGAFVGTPEVALIRMTADGRLPADQR     | 1  |
| M3K14_HUMAN (Q99558) Mitogen-activated protein kinase kinase kinase 14 (EC 2.7.11.25) (NF-kappa beta-inducing kinase) (Serine/threonine-protein kinase NIK) (HsNIK) [MASS=104041] | 0.00 | 6.44  | 0.99 | 0.00 | 1 | 3 |   | 3 | YDM[147]EVPDSGIDLQC[339]TLAPDGSAFWSWR        | 1  |
|                                                                                                                                                                                   |      |       |      |      |   |   |   | 1 | SLAHAGVALAK                                  | 1  |
|                                                                                                                                                                                   |      |       |      |      |   |   |   | 3 | AEELMAC[339]AGLTSRIVPLYGAVR                  | 1  |
| M3K4_HUMAN (Q9Y6R4) Mitogen-activated protein kinase kinase kinase 4 (EC 2.7.11.25) (MAPK/ERK kinase kinase 4) (MEK kinase 4) (MEKK 4) (MAP three kinase 1) [MASS=181550]         | *    | 2.30  | *    | *    | * |   | 2 | 3 | IGEGQYGKVTYC[339]ISVDTGELMAM[147]K           | 2  |
|                                                                                                                                                                                   |      |       |      |      |   |   |   | 2 | TINDQDFFLYTAR                                | 1  |

|                                                                                                                                                                                                               |      |      |      |      |   |    |   |                                        |   |
|---------------------------------------------------------------------------------------------------------------------------------------------------------------------------------------------------------------|------|------|------|------|---|----|---|----------------------------------------|---|
| M3K5_HUMAN (Q99683) Mitogen-activated protein kinase kinase 5 (EC 2.7.11.25) (MAPK/ERK kinase 5) (MEK kinase 5) (MEKK 5) (Apoptosis signal-regulating kinase 1) (ASK-1) [MASS=154536]                         | *    | 2.47 | *    | *    | * | 1  | 3 | HKNIVQYLGFSFSENGFIKIFMEQVPGGSLALLR     | 1 |
|                                                                                                                                                                                                               |      |      |      |      |   |    | 2 | QHTILMSDK                              | 1 |
|                                                                                                                                                                                                               |      |      |      |      |   |    | 3 | HLWENLGEKIAHRQHK                       | 1 |
| MACF1_HUMAN (Q9UPN3) Microtubule-actin crosslinking factor 1, isoforms 1/2/3/5 (Actin cross-linking family protein 7) (Macrophin-1) (Trabeculin-alpha) (620 kDa actin-binding protein) (ABP620) [MASS=620414] | *    | 3.22 | *    | *    | * | 10 | 3 | EETYNQLLDKGR                           | 1 |
|                                                                                                                                                                                                               |      |      |      |      |   |    | 3 | AVVRVADERDR                            | 1 |
|                                                                                                                                                                                                               |      |      |      |      |   |    | 2 | DIMEIEGEPAPDHR                         | 1 |
|                                                                                                                                                                                                               |      |      |      |      |   |    | 3 | LEGIGQFHC[330]RVREMFSQLADLDDDELDMGAIGR | 1 |
|                                                                                                                                                                                                               |      |      |      |      |   |    | 3 | EETDGLHEELEFIRILGADLIFAC[330]GETEKPEVR | 1 |
|                                                                                                                                                                                                               |      |      |      |      |   |    | 3 | HINDLYEDLRDGHNLISLLEVLGSIK             | 1 |
|                                                                                                                                                                                                               |      |      |      |      |   |    | 3 | EIKFLDVLELAEK                          | 1 |
|                                                                                                                                                                                                               |      |      |      |      |   |    | 2 | LMALGPIR                               | 1 |
| MACF4_HUMAN (Q96PK2) Microtubule-actin crosslinking factor 1, isoform 4 [MASS=670146]                                                                                                                         | *    | 1.38 | *    | *    | * | 5  | 2 | TC[339]KPAFLSEEKLYQETAIR               | 1 |
|                                                                                                                                                                                                               |      |      |      |      |   |    | 2 | LSVDNAFRHGLIGEDLAEK                    | 1 |
|                                                                                                                                                                                                               |      |      |      |      |   |    | 2 | ASKGRDAEK                              | 1 |
|                                                                                                                                                                                                               |      |      |      |      |   |    | 2 | QETNYQDSWVTSKTK                        | 1 |
|                                                                                                                                                                                                               |      |      |      |      |   |    | 3 | PRM[147]SSDAKEFISIINPHNLK              | 1 |
| MAGAB_HUMAN (P43364) Melanoma-associated antigen 11 (MAGE-11 antigen) [MASS=48129]                                                                                                                            | *    | 5.59 | *    | *    | * | 1  | 2 | QVPGTDPAC[339]YEFLWGPRAHAETSK          | 1 |
| MAML3_HUMAN (Q96JK9) Mastermind-like protein 3 (Mam-3) [MASS=121692]                                                                                                                                          | *    | 2.21 | *    | *    | * | 1  | 2 | TSGELGPFNNGASYPLQAGQPRLTK              | 1 |
| MAON_HUMAN (Q16798) NADP-dependent malic enzyme, mitochondrial precursor (EC 1.1.1.40) (NADP-ME) (Malic enzyme 3) [MASS=67054]                                                                                | 0.99 | 6.13 | 1.27 | 0.00 | 1 | 2  | 2 | FGINC[339]LIQFEDFANANAFR               | 1 |
|                                                                                                                                                                                                               |      |      |      |      |   |    | 2 | ILGLGDLGC[339]YGM[147]GIPVVK           | 1 |
| MAOX_HUMAN (P48163) NADP-dependent malic enzyme (EC 1.1.1.40) (NADP-ME) (Malic enzyme 1) [MASS=64149]                                                                                                         | *    | 4.55 | *    | *    | * | 2  | 1 | HTHQR                                  | 1 |
|                                                                                                                                                                                                               |      |      |      |      |   |    | 3 | EKFAHEHEEM[147]KNLEAIVQEIK             | 1 |
| MAP1A_HUMAN (P78559) Microtubule-associated protein 1A (MAP 1A) (Proliferation-related protein p80) [Contains: MAP1 light chain LC2] [MASS=306529]                                                            | 1.00 | 2.75 | 0.64 | 0.05 | 2 | 5  | 2 | LSKPC[330]C[330]YIFPGGR                | 1 |
|                                                                                                                                                                                                               |      |      |      |      |   |    | 3 | SSLLLDTVTSIPSSR                        | 1 |
|                                                                                                                                                                                                               |      |      |      |      |   |    | 3 | RSPTPGKGSXDR                           | 1 |
|                                                                                                                                                                                                               |      |      |      |      |   |    | 3 | SFQYADIYEQM[147]M[147]LTGLGPAC[330]PTR | 1 |
|                                                                                                                                                                                                               |      |      |      |      |   |    | 2 | SIEEAC[330]LTLQHLNR                    | 1 |



|                                                                                                                                                                                                                                                                              |      |       |      |      |   |   |   |                                                         |   |
|------------------------------------------------------------------------------------------------------------------------------------------------------------------------------------------------------------------------------------------------------------------------------|------|-------|------|------|---|---|---|---------------------------------------------------------|---|
| MAP1B_HUMAN (P46821) Microtubule-associated protein 1B (MAP 1B) [Contains: MAP1 light chain LC1] [MASS=270618]                                                                                                                                                               | 0.00 | 1.99  | *    | *    | * | 2 | 3 | HPDVSMVDPEALAIQNLGKALK                                  | 1 |
|                                                                                                                                                                                                                                                                              |      |       |      |      |   |   | 2 | DAYC[330]SEVKASTTLDIKDSISAVSSEK                         | 1 |
| MAASP2_HUMAN (O00187) Mannan-binding lectin serine protease 2 precursor (EC 3.4.21.104) (Mannose-binding protein-associated serine protease 2) (MASP-2) (MBL-associated serine protease 2) [Contains: Mannan-binding lectin serine protease 2 A chain; Mannan-b [MASS=75685] | *    | 1.31  | *    | *    | * | 1 | 2 | HDASALDIR                                               | 2 |
| MAST3_HUMAN (O60307) Microtubule-associated serine/threonine-protein kinase 3 (EC 2.7.11.1) [MASS=143136]                                                                                                                                                                    | *    | 4.05  | *    | *    | * | 3 | 3 | PLSPLSVPTAGSSPLDSPR                                     | 1 |
|                                                                                                                                                                                                                                                                              |      |       |      |      |   |   | 3 | SPSPLPGHPPAPARSPR                                       | 1 |
|                                                                                                                                                                                                                                                                              |      |       |      |      |   |   | 2 | IGLM[147]SMATNLYEGHIEK                                  | 1 |
|                                                                                                                                                                                                                                                                              |      |       |      |      |   |   | 2 | C[339]VKVDLSEK                                          | 2 |
| MATR3_HUMAN (P43243) Matrin-3 [MASS=94623]                                                                                                                                                                                                                                   | 0.00 | 4.13  | 0.49 | 0.00 | 1 | 3 | 2 | GRVETSRVVHIMDFQR                                        | 1 |
|                                                                                                                                                                                                                                                                              |      |       |      |      |   |   | 1 | KDGSASAAAK                                              | 1 |
| MCCC2_HUMAN (Q9HCC0) Methylcrotonoyl-CoA carboxylase beta chain, mitochondrial precursor (EC 6.4.1.4) (3-Methylcrotonyl-CoA carboxylase 2) (MCCase subunit beta) (3-methylcrotonyl-CoA:carbon dioxide ligase subunit beta) (3-Methylcrotonyl-CoA carboxylase n [MASS=61333]  | 0.99 | 11.55 | 1.25 | 0.09 | 2 | 3 | 2 | ITLIIGGSYGAGNYGMC[330]GR                                | 1 |
|                                                                                                                                                                                                                                                                              |      |       |      |      |   |   | 2 | GTHFVQLC[339]C[339]QR                                   | 2 |
|                                                                                                                                                                                                                                                                              |      |       |      |      |   |   | 3 | DGAKM[147]VAAVAC[330]AQVPKITLIIGGSYGAGNYGM[147]C[330]GR | 1 |
| MCE1_HUMAN (O60942) mRNA capping enzyme (HCE) (HCAP1) [Includes: Polynucleotide 5'-triphosphatase (EC 3.1.3.33) (mRNA 5'-triphosphatase) (TPase); mRNA guanylyltransferase (EC 2.7.7.50) (GTP--RNA guanylyltransferase) (GTase)] [MASS=68556]                                | *    | 2.85  | *    | *    | * | 1 | 2 | GVTQVTTQPKLGEVQQK                                       | 1 |
| MDGA1_HUMAN (Q8NFP4) MAM domain-containing glycosylphosphatidylinositol anchor protein 1 precursor (MAM domain-containing protein 3) (GPI and MAM protein) (Glycosylphosphatidylinositol-MAM) (GPIM) [MASS=105790]                                                           | 0.00 | 1.26  | 0.40 | 0.00 | 1 | 1 | 2 | LSC[330]HVDVAVPQEK                                      | 1 |

|                                                                                                                                                                |                           |       |      |      |    |   |   |                                           |   |
|----------------------------------------------------------------------------------------------------------------------------------------------------------------|---------------------------|-------|------|------|----|---|---|-------------------------------------------|---|
| MDHC_HUMAN (P40925) Malate dehydrogenase, cytoplasmic (EC 1.1.1.37) (Cytosolic malate dehydrogenase) [MASS=36295]                                              | 0.99                      | 6.01  | 0.40 | 0.08 | 3  | 2 | 3 | ENFSC[339]LTRLDHNR                        | 1 |
|                                                                                                                                                                |                           |       |      |      |    |   | 2 | AIC[330]DHVR                              | 2 |
|                                                                                                                                                                |                           |       |      |      |    |   | 2 | AIC[339]DHVR                              | 1 |
|                                                                                                                                                                |                           |       |      |      |    |   | 2 | PVSAALRRSFSTSAQNNAK                       | 1 |
|                                                                                                                                                                |                           |       |      |      |    |   | 3 | GYLGPEQLPDC[339]LKGC[339]DVVVIPAGVPR      | 1 |
|                                                                                                                                                                |                           |       |      |      |    |   | 2 | TIIP LISQC[339]TPK                        | 1 |
|                                                                                                                                                                |                           |       |      |      |    |   | 2 | SQETEC[339]TYFSTPLLLGK                    | 2 |
|                                                                                                                                                                |                           |       |      |      |    |   | 2 | GYLGPEQLPDC[339]LK                        | 3 |
|                                                                                                                                                                |                           |       |      |      |    |   | 2 | TIIP LISQC[330]TPK                        | 1 |
|                                                                                                                                                                |                           |       |      |      |    |   | 2 | GYLGPEQLPDC[330]LK                        | 2 |
| MDHM_HUMAN (P40926) Malate dehydrogenase, mitochondrial precursor (EC 1.1.1.37) [MASS=35531]                                                                   | 1.00                      | 39.94 | 1.16 | 0.07 | 19 | 8 | 2 | GC[330]DVVVIPAGVPR                        | 2 |
|                                                                                                                                                                |                           |       |      |      |    |   | 3 | GYLGPEQLPDC[330]LKGC[330]DVVVIPAGVPR      | 1 |
|                                                                                                                                                                |                           |       |      |      |    |   | 2 | GC[339]DVVVIPAGVPR                        | 2 |
|                                                                                                                                                                |                           |       |      |      |    |   | 1 | TIIP LISQC[339]TPK                        | 1 |
|                                                                                                                                                                |                           |       |      |      |    |   | 2 | SQETEC[330]TYFSTPLLLGKK                   | 1 |
|                                                                                                                                                                |                           |       |      |      |    |   | 2 | SQETEC[330]TYFSTPLLLGK                    | 2 |
|                                                                                                                                                                |                           |       |      |      |    |   | 2 | VSSFEEKMISDAIPELK                         | 1 |
|                                                                                                                                                                |                           |       |      |      |    |   | 2 | C[339]HPRATC[330]LNTPLSYEC[330]HC[339]QR  | 1 |
| 3                                                                                                                                                              | YSHVA AVLGGSVLLVAGGYSGRPR | 1     |      |      |    |   |   |                                           |   |
| MEGF8_HUMAN (Q7Z7M0) Multiple epidermal growth factor-like domains 8 (EGF-like domain-containing protein 4) (Multiple EGF-like domain protein 4) [MASS=254572] | *                         | 1.84  | *    | *    | *  | 2 | 2 | C[339]HPRATC[330]LNTPLSYEC[330]HC[339]QR  | 1 |
|                                                                                                                                                                |                           |       |      |      |    |   | 3 | YSHVA AVLGGSVLLVAGGYSGRPR                 | 1 |
| MERL_HUMAN (P35240) Merlin (Moesin-ezrin-radixin-like protein) (Neurofibromin-2) (Schwannomin) (Schwannomerlin) [MASS=69690]                                   | 0.00                      | 3.87  | 0.81 | 0.00 | 1  | 1 | 3 | QPKTFTVRIVTMDAEM[147]EFNC[330]EMK         | 1 |
|                                                                                                                                                                |                           |       |      |      |    |   | 3 | QPKTFTVRIVTMDAEMEFNC[330]EM[147]K         | 2 |
| MFN2_HUMAN (O95140) Transmembrane GTPase MFN2 (EC 3.6.5.-) (Mitofusin-2) [MASS=86402]                                                                          | 0.00                      | 6.08  | 1.23 | 0.00 | 1  | 2 | 2 | VLPSGIGHTTNC[330]FLR                      | 1 |
|                                                                                                                                                                |                           |       |      |      |    |   | 3 | TSNGKSTVINAM[147]LWDKVLPSGIGHTTNC[330]FLR | 1 |
| MGR2_HUMAN (Q14416) Metabotropic glutamate receptor 2 precursor (mGluR2) [MASS=95567]                                                                          | 0.00                      | 3.21  | 3.52 | 0.00 | 1  | 2 | 2 | ALC[339]PNTRR                             | 1 |
|                                                                                                                                                                |                           |       |      |      |    |   | 3 | IM[147]FVVNAVYAM[147]AHALHNMHR            | 1 |

|                                                                                                                                                                                                                                                                              |                         |       |      |      |   |   |   |                                    |                                            |   |
|------------------------------------------------------------------------------------------------------------------------------------------------------------------------------------------------------------------------------------------------------------------------------|-------------------------|-------|------|------|---|---|---|------------------------------------|--------------------------------------------|---|
|                                                                                                                                                                                                                                                                              |                         |       |      |      |   |   |   | 3                                  | GALGSIALLGLVGTTC[330]SAFQHLGWVK            | 2 |
| MGST3_HUMAN (O14880) Microsomal glutathione S-transferase 3 (EC 2.5.1.18) (Microsomal GST-3) (Microsomal GST-III) [MASS=16516]                                                                                                                                               | 1.00                    | 48.03 | 0.95 | 0.02 | 7 | 3 |   | 2                                  | YKVEYPIMYSTDPENGHIFNC[330]IQR              | 1 |
|                                                                                                                                                                                                                                                                              |                         |       |      |      |   |   |   | 2                                  | YKVEYPIM[147]YSTDPENGHIFNC[339]IQR         | 1 |
|                                                                                                                                                                                                                                                                              |                         |       |      |      |   |   |   | 3                                  | VEYPIM[147]YSTDPENGHIFNC[339]IQR           | 1 |
|                                                                                                                                                                                                                                                                              |                         |       |      |      |   |   |   | 2                                  | VEYPIM[147]YSTDPENGHIFNC[330]IQR           | 1 |
|                                                                                                                                                                                                                                                                              |                         |       |      |      |   |   |   | 2                                  | YKVEYPIM[147]YSTDPENGHIFNC[330]IQR         | 1 |
|                                                                                                                                                                                                                                                                              |                         |       |      |      |   |   |   | 2                                  | VEYPIM[147]YSTDPENGHIFNC[339]IQR           | 1 |
|                                                                                                                                                                                                                                                                              |                         |       |      |      |   |   | 3 | YKVEYPIM[147]YSTDPENGHIFNC[339]IQR | 1                                          |   |
| MICA2_HUMAN (O94851) Protein MICAL-2 [MASS=126688]                                                                                                                                                                                                                           | 0.00                    | 2.58  | 0.32 | 0.00 | 1 | 1 |   | 3                                  | AQATSPDLESMRKSFPLNLGSDTC[330]YFC[330]K     | 1 |
| MIER1_HUMAN (Q8N108) Mesoderm induction early response protein 1 (Mi-er1) (hmi-er1) (Early response 1) (Er1) [MASS=60653]                                                                                                                                                    | 0.00                    | 9.33  | 0.63 | 0.00 | 1 | 2 |   | 2                                  | EIMVGSMFQAEIPVGIC[330]R                    | 1 |
|                                                                                                                                                                                                                                                                              |                         |       |      |      |   |   |   | 3                                  | DSSGQEDETQSSNDPQSQSVASQDAQEIIIRPR          | 1 |
| MINK1_HUMAN (Q8N4C8) Misshapen-like kinase 1 (EC 2.7.11.1) (Mitogen-activated protein kinase kinase kinase 6) (MAPK/ERK kinase kinase 6) (MEK kinase 6) (MEKKK 6) (Misshapen/NIK-related kinase) (GCK family kinase MiNK) [MASS=149808]                                      | *                       | 4.50  | *    | *    | * | 2 |   | 3                                  | KRFNSEILC[330]AALWGVNLLVGTENGLM[147]LLDR   | 1 |
|                                                                                                                                                                                                                                                                              |                         |       |      |      |   |   |   | 3                                  | IIKDVVLQWGEMPTSVAYIC[330]SNQIMGWGEK        | 1 |
|                                                                                                                                                                                                                                                                              |                         |       |      |      |   |   |   |                                    |                                            |   |
| MLL2_HUMAN (O14686) Myeloid/lymphoid or mixed-lineage leukemia protein 2 (ALL1-related protein) [MASS=564181]                                                                                                                                                                | 0.00                    | 3.50  | 1.16 | 0.00 | 1 | 9 |   | 1                                  | PALHLR                                     | 1 |
|                                                                                                                                                                                                                                                                              |                         |       |      |      |   |   |   | 3                                  | ASPVPSDPEKPGTPGEGMLSSDLDRISTEELPK          | 1 |
|                                                                                                                                                                                                                                                                              |                         |       |      |      |   |   |   | 3                                  | QPGLPQPLMPTQPPAHALQQR                      | 1 |
|                                                                                                                                                                                                                                                                              |                         |       |      |      |   |   |   | 3                                  | AEINGHIDSKLAGLEQK                          | 1 |
|                                                                                                                                                                                                                                                                              |                         |       |      |      |   |   |   | 3                                  | GSEVSVM[147]LTVSAAADKNLNGVM[147]VAVAELLSMK | 1 |
|                                                                                                                                                                                                                                                                              |                         |       |      |      |   |   |   | 3                                  | PVAPVAPPELVPMK                             | 1 |
|                                                                                                                                                                                                                                                                              |                         |       |      |      |   |   |   | 3                                  | LAPEGLRGLAVSGLPPQK                         | 1 |
| 3                                                                                                                                                                                                                                                                            | REANGEPIGAPGTSNHLLLAGPR | 2     |      |      |   |   |   |                                    |                                            |   |
|                                                                                                                                                                                                                                                                              |                         |       |      |      |   |   | 2 | GYHTFC[339]LKPPM[147]EELPAHSWK     | 1                                          |   |
| MLP3A_HUMAN (Q9H492) Microtubule-associated proteins 1A/1B light chain 3A precursor (MAP1A/MAP1B LC3 A) (MAP1A/1B light chain 3 A) (MAP1 light chain 3-like protein 1) (Microtubule-associated protein 1 light chain 3 alpha) (Autophagy-related protein LC3 A) [MASS=14272] | 0.00                    | 6.61  | 0.86 | 0.00 | 1 | 1 |   | 2                                  | C[339]KEVQQIR                              | 1 |
|                                                                                                                                                                                                                                                                              |                         |       |      |      |   |   |   |                                    |                                            |   |

|                                                                                                                                                                                                                        |      |       |      |      |   |   |                  |                                                                                             |                  |
|------------------------------------------------------------------------------------------------------------------------------------------------------------------------------------------------------------------------|------|-------|------|------|---|---|------------------|---------------------------------------------------------------------------------------------|------------------|
| MMP25_HUMAN (Q9NPA2) Matrix metalloproteinase-25 precursor (EC 3.4.24.-) (MMP-25) (Membrane-type matrix metalloproteinase 6) (MT-MMP 6) (Membrane-type-6 matrix metalloproteinase) (MT6-MMP) (Leukolysin) [MASS=62554] | 0.00 | 3.38  | 0.28 | 0.00 | 1 | 1 | 3                | C[330]EGNFDAIANIRGETFFFK                                                                    | 1                |
|                                                                                                                                                                                                                        |      |       |      |      |   |   | 1                | TFPGIPK                                                                                     | 19               |
| MMP3_HUMAN (P08254) Stromelysin-1 precursor (EC 3.4.24.17) (Matrix metalloproteinase-3) (MMP-3) (Transin-1) (SL-1) [MASS=53977]                                                                                        | *    | 1.47  | *    | *    | * | 1 |                  |                                                                                             |                  |
| MMS19_HUMAN (Q96T76) MMS19-like protein (hMMS19) (MET18 homolog) [MASS=113275]                                                                                                                                         | 0.00 | 2.91  | 0.58 | 0.00 | 1 | 2 | 2<br>2           | AC[330]DSVTSNVLPLLEQFHK<br>LLQAAAGASAR                                                      | 1<br>1           |
| MMSA_HUMAN (Q02252) Methylmalonate-semialdehyde dehydrogenase [acylating], mitochondrial precursor (EC 1.2.1.27) (MMSDH) (Malonate-semialdehyde dehydrogenase [acylating]) (EC 1.2.1.18) [MASS=57839]                  | 0.99 | 13.64 | 1.52 | 0.01 | 2 | 3 | 3<br>3<br>2      | RVQANM[147]GAKNHGVVMPDANK<br>LLQDSGAPDGTLNIIHGQHEAVNFIC[339]DHPDIK<br>IKVKGYENGNFVGPTIISNVK | 1<br>2<br>1      |
| MOG_HUMAN (Q16653) Myelin-oligodendrocyte glycoprotein precursor [MASS=28179]                                                                                                                                          | 0.99 | 19.84 | 0.83 | 0.00 | 1 | 4 | 2<br>3<br>3<br>2 | FSDEGGFTC[339]FFR<br>NATGM[147]EVGWYRPPFSR<br>ALVGDEVELPC[339]JR<br>VIGPRHPIR               | 1<br>2<br>1<br>1 |

|                                                                                                                                                                                                                                                                               |      |       |      |      |   |   |   |                                             |   |
|-------------------------------------------------------------------------------------------------------------------------------------------------------------------------------------------------------------------------------------------------------------------------------|------|-------|------|------|---|---|---|---------------------------------------------|---|
| MORC4_HUMAN (Q8TE76) MORC family CW-type zinc finger 4 (Zinc finger CW-type coiled-coil domain protein 2) [MASS=106347]                                                                                                                                                       | *    | 5.98  | *    | *    | * | 2 | 3 | M[147]TGGVTSSELPETEYSLRAFAC[330]GILYMKPR    | 1 |
|                                                                                                                                                                                                                                                                               |      |       |      |      |   |   | 3 | TVFIDVEEVKNKSC[339]LFTTDDGC[339]GM[147]TPHK | 1 |
|                                                                                                                                                                                                                                                                               |      |       |      |      |   |   | 2 | VLYSNMLGEENTYLWR                            | 1 |
| MPCP_HUMAN (Q00325) Phosphate carrier protein, mitochondrial precursor (PTP) (Solute carrier family 25 member 3) [MASS=40095]                                                                                                                                                 | 0.96 | 14.09 | 1.09 | 0.00 | 1 | 4 | 3 | LPRPPPEMPESLKK                              | 1 |
|                                                                                                                                                                                                                                                                               |      |       |      |      |   |   | 2 | QIPYTMM[147]KFAC[339]FER                    | 1 |
|                                                                                                                                                                                                                                                                               |      |       |      |      |   |   | 2 | FAC[330]FER                                 | 1 |
|                                                                                                                                                                                                                                                                               |      |       |      |      |   |   | 1 | FAC[330]FER                                 | 1 |
| MPPA_HUMAN (Q10713) Mitochondrial-processing peptidase alpha subunit, mitochondrial precursor (EC 3.4.24.64) (Alpha-MPP) (P-55) [MASS=58253]                                                                                                                                  | 0.99 | 2.10  | 1.02 | 0.00 | 1 | 1 | 2 | HGGIC[330]DC[330]QTSR                       | 1 |
| MPRI_HUMAN (P11717) Cation-independent mannose-6-phosphate receptor precursor (CI Man-6-P receptor) (CI-MPR) (M6PR) (Insulin-like growth factor 2 receptor) (Insulin-like growth factor II receptor) (IGF-II receptor) (M6P/IGF2 receptor) (M6P/IGF2R) (300 kD) [MASS=274274] | *    | 5.90  | *    | *    | * | 7 | 3 | FISSPMKEKGNIQLSYSDGDDC[330]GHGK             | 1 |
|                                                                                                                                                                                                                                                                               |      |       |      |      |   |   | 3 | NGSKNLGKFISSPMK                             | 1 |
|                                                                                                                                                                                                                                                                               |      |       |      |      |   |   | 3 | YDFYINVC[330]GPVSVSPC[339]QPDSGAC[330]QVAK  | 1 |
|                                                                                                                                                                                                                                                                               |      |       |      |      |   |   | 3 | M[147]DGC[339]TLTDEQLLYSFNLSLSTSTFKVTR      | 1 |
|                                                                                                                                                                                                                                                                               |      |       |      |      |   |   | 2 | YASAC[339]QM[147]KYEK                       | 1 |
|                                                                                                                                                                                                                                                                               |      |       |      |      |   |   | 3 | TQYAC[339]PPFDLTEC[330]SFKDGAGNSFDLSSLSR    | 1 |
|                                                                                                                                                                                                                                                                               |      |       |      |      |   |   | 1 | GKSSSAQQK                                   | 1 |
| MRC2_HUMAN (Q9UBG0) Macrophage mannose receptor 2 precursor (Urokinase receptor-associated protein) (Endocytic receptor 180) (CD280 antigen) [MASS=166654]                                                                                                                    | 0.00 | 1.35  | *    | *    | * | 1 | 2 | ISYHGSC[339]PQGLADSAWIPFR                   | 1 |
| MTA3_HUMAN (Q9BTC8) Metastasis-associated protein MTA3 [MASS=67503]                                                                                                                                                                                                           | *    | 2.53  | *    | *    | * | 1 | 3 | PLAC[339]IIGYLEIHPAK                        | 1 |
| MTCH1_HUMAN (Q9NZJ7) Mitochondrial carrier homolog 1 (Presenilin-associated protein) [MASS=41544]                                                                                                                                                                             | *    | 5.40  | *    | *    | * | 1 | 3 | IGLFRGLSPRLMSNALSTVTR                       | 1 |
| MTCH2_HUMAN (Q9Y6C9) Mitochondrial carrier homolog 2 (Met-induced mitochondrial protein) [MASS=33331]                                                                                                                                                                         | 0.99 | 9.24  | 0.80 | 0.00 | 1 | 2 | 2 | VPFKTYC[339]C[339]DLKM[147]LI               | 1 |
|                                                                                                                                                                                                                                                                               |      |       |      |      |   |   | 2 | LC[330]SGVLGTVVHGK                          | 1 |
| MTMR6_HUMAN (Q9Y217) Myotubularin-related protein 6 (EC 3.1.3.-) [MASS=71953]                                                                                                                                                                                                 | 0.00 | 10.47 | 0.34 | 0.00 | 1 | 3 | 3 | AITVENASVLVHC[330]SDGWDR                    | 1 |
|                                                                                                                                                                                                                                                                               |      |       |      |      |   |   | 3 | TSQVC[339]SLGSLLLDSYYRTIK                   | 1 |
|                                                                                                                                                                                                                                                                               |      |       |      |      |   |   | 3 | LALTTSGC[339]PLVIQC[330]KNFRTVHFIVPR        | 1 |
| MTMRD_HUMAN (Q86WG5) Myotubularin-related protein 13 (SET-binding factor 2) [MASS=208463]                                                                                                                                                                                     | *    | 3.03  | *    | *    | * | 3 | 2 | ASFKLMR                                     | 1 |
|                                                                                                                                                                                                                                                                               |      |       |      |      |   |   | 2 | HFPSESDLAGEAGPRSQR                          | 1 |
|                                                                                                                                                                                                                                                                               |      |       |      |      |   |   | 2 | VSGLIQPAEVFAPKSLVLSRLYPEIFR                 | 1 |

|                                                                                                                                                                                                                             |      |      |      |      |   |   |   |                                               |   |
|-----------------------------------------------------------------------------------------------------------------------------------------------------------------------------------------------------------------------------|------|------|------|------|---|---|---|-----------------------------------------------|---|
| MUC2_HUMAN (Q02817) Mucin-2 precursor (Intestinal mucin-2) [MASS=540296]                                                                                                                                                    | 0.00 | 1.95 | 1.39 | 0.00 | 1 | 5 | 3 | AQALDHSC[330]SC[330]C[339]KEEKTSQR            | 1 |
|                                                                                                                                                                                                                             |      |      |      |      |   |   | 2 | FPGLC[330]DYNFASDC[339]RGSYKEFAVHLK           | 1 |
|                                                                                                                                                                                                                             |      |      |      |      |   |   | 3 | VQC[339]DVSVGFIC[339]K                        | 1 |
|                                                                                                                                                                                                                             |      |      |      |      |   |   | 3 | SLSEADSHC[339]LEGFAPVDGC[339]GC[339]PDHTFLDEK | 1 |
|                                                                                                                                                                                                                             |      |      |      |      |   |   | 2 | PIYEEDLKKC[330]VTADK                          | 1 |
| MX2_HUMAN (P20592) Interferon-induced GTP-binding protein Mx2 (Interferon-regulated resistance GTP-binding protein MxB) (p78-related protein) [MASS=82088]                                                                  | *    | 6.71 | *    | *    | * | 2 | 3 | AENM[147]IQLQFRM[147]EQMVFC[330]QDQIYSVVLK    | 1 |
|                                                                                                                                                                                                                             |      |      |      |      |   |   | 3 | MEQM[147]VFC[339]QDQIYSVVLKKVR                | 1 |
| MY18B_HUMAN (Q8IUG5) Myosin-18B (Myosin XVIIIb) [MASS=285183]                                                                                                                                                               | *    | 1.75 | *    | *    | * | 3 | 3 | TGYADHM[147]GLTR                              | 1 |
|                                                                                                                                                                                                                             |      |      |      |      |   |   | 2 | QLAVASPEREIPESISQPNK                          | 1 |
|                                                                                                                                                                                                                             |      |      |      |      |   |   | 2 | QSATSSRILSPR                                  | 1 |
| MYCN_HUMAN (P04198) N-myc proto-oncogene protein [MASS=49561]                                                                                                                                                               | *    | 3.23 | *    | *    | * | 1 | 3 | SEASPRPLKSVIPPK                               | 1 |
| MYH9_HUMAN (P35579) Myosin-9 (Myosin heavy chain, nonmuscle IIa) (Nonmuscle myosin heavy chain IIa) (NMMHC II-a) (NMMHC-IIA) (Cellular myosin heavy chain, type A) (Nonmuscle myosin heavy chain-A) (NMMHC-A) [MASS=226400] | 0.53 | 3.57 | 0.81 | 0.00 | 1 | 4 | 2 | HEAM[147]ITDLEER                              | 1 |
|                                                                                                                                                                                                                             |      |      |      |      |   |   | 3 | SM[147]EAEM[147]IQLQEELAAAER                  | 1 |
|                                                                                                                                                                                                                             |      |      |      |      |   |   | 2 | SM[147]M[147]QDREDQSILC[330]TGESGAGKTENTK     | 1 |
|                                                                                                                                                                                                                             |      |      |      |      |   |   | 2 | KLEEEQIILEDQNC[330]K                          | 1 |
| MYO5A_HUMAN (Q9Y411) Myosin-5A (Myosin Va) (Dilute myosin heavy chain, non-muscle) (Myosin heavy chain 12) (Myoxin) [MASS=215420]                                                                                           | 0.93 | 2.16 | 0.96 | 0.00 | 1 | 4 | 2 | C[330]IEEHADR                                 | 1 |
|                                                                                                                                                                                                                             |      |      |      |      |   |   | 3 | KLATATETYIK                                   | 1 |
|                                                                                                                                                                                                                             |      |      |      |      |   |   | 2 | EHKAVIIQK                                     | 1 |
|                                                                                                                                                                                                                             |      |      |      |      |   |   | 2 | MPKGTDDTWAQK                                  | 1 |
|                                                                                                                                                                                                                             |      |      |      |      |   |   | 3 | EQALDVRDAFVKGIYGR                             | 1 |
| MYO7A_HUMAN (Q13402) Myosin-7A (Myosin VIIa) [MASS=254404]                                                                                                                                                                  | *    | 4.83 | *    | *    | * | 5 | 3 | ELLEQM[147]ERARHEPVNHSDM[147]VDK              | 1 |
|                                                                                                                                                                                                                             |      |      |      |      |   |   | 2 | MDDLTSYISQMLTAM[147]SKQR                      | 1 |
|                                                                                                                                                                                                                             |      |      |      |      |   |   | 3 | DAFVKGIYGRFVWIVDK                             | 1 |
|                                                                                                                                                                                                                             |      |      |      |      |   |   | 3 | LLC[339]ETSLGYKM[147]DDLTSYISQM[147]LTAMSKQR  | 1 |
|                                                                                                                                                                                                                             |      |      |      |      |   |   | 3 | LVAASPSAM[147]LSQSLDLSDR                      | 1 |
| MYO9B_HUMAN (Q13459) Myosin-9B (Myosin IXb) (Unconventional myosin-9b) [MASS=243556]                                                                                                                                        | *    | 2.55 | *    | *    | * | 3 | 2 | LLPSLAKAQPAEETTDGERSAK                        | 1 |
|                                                                                                                                                                                                                             |      |      |      |      |   |   | 2 | VTQEQQVSLLEDK                                 | 1 |
|                                                                                                                                                                                                                             |      |      |      |      |   |   | 3 | SRSTSRGDVNDQDAIQEK                            | 1 |
| MYOTI_HUMAN (Q9UBF9) Myotilin (Titin immunoglobulin domain protein) (Myofibrillar titin-like Ig domains protein) (57 kDa cytoskeletal protein) [MASS=55395]                                                                 | 0.00 | 7.03 | 3.37 | 0.00 | 1 | 2 | 3 | SRSTSRGDVNDQDAIQEK                            | 1 |
|                                                                                                                                                                                                                             |      |      |      |      |   |   | 2 | FIQVPENMSIDEGRFC[339]R                        | 1 |

|                                                                                                                                                                                                                                                                                |      |       |      |      |    |   |   |                                     |   |
|--------------------------------------------------------------------------------------------------------------------------------------------------------------------------------------------------------------------------------------------------------------------------------|------|-------|------|------|----|---|---|-------------------------------------|---|
| MYPN_HUMAN (Q86TC9) Myopalladin (145 kDa sarcomeric protein) [MASS=145256]                                                                                                                                                                                                     | *    | 8.33  | *    | *    | *  | 5 | 2 | IQKPNEVSSPPTTSAVIPPQAVPQAQHLVAQPR   | 1 |
|                                                                                                                                                                                                                                                                                |      |       |      |      |    |   | 2 | YGSLTSKGLDIFSAFSSMESTMVYSC[330]SSR  | 1 |
|                                                                                                                                                                                                                                                                                |      |       |      |      |    |   | 2 | HFRVTEGSPVTFTC[330]K                | 1 |
|                                                                                                                                                                                                                                                                                |      |       |      |      |    |   | 2 | FFRPFLQAPGDMVAHEGR                  | 1 |
|                                                                                                                                                                                                                                                                                |      |       |      |      |    |   | 3 | VMQENSSSFSDLSEK                     | 1 |
|                                                                                                                                                                                                                                                                                |      |       |      |      |    |   | 2 | VC[339]GSNLLSIC[339]K               | 1 |
| MYPN_HUMAN (Q86TC9) Myopalladin (145 kDa sarcomeric protein) [MASS=145256]                                                                                                                                                                                                     |      |       |      |      |    |   | 2 | VC[330]GSNLLSIC[330]K               | 2 |
|                                                                                                                                                                                                                                                                                |      |       |      |      |    |   | 2 | TTIC[330]GK                         | 1 |
|                                                                                                                                                                                                                                                                                |      |       |      |      |    |   | 2 | VC[339]HC[339]LGK                   | 1 |
|                                                                                                                                                                                                                                                                                |      |       |      |      |    |   | 2 | GSRGQHQAHSLER                       | 1 |
|                                                                                                                                                                                                                                                                                |      |       |      |      |    |   | 1 | VC[339]GSNLLSIC[339]K               | 1 |
|                                                                                                                                                                                                                                                                                |      |       |      |      |    |   | 1 | VC[330]GSNLLSIC[330]K               | 1 |
| MYPR_HUMAN (P60201) Myelin proteolipid protein (PLP) (Lipophilin) [MASS=29946]                                                                                                                                                                                                 | 1.00 | 18.12 | 1.26 | 0.04 | 12 | 5 | 2 | TSASIGSLC[330]ADAR                  | 1 |
|                                                                                                                                                                                                                                                                                |      |       |      |      |    |   | 2 | VC[330]HC[330]LGK                   | 1 |
|                                                                                                                                                                                                                                                                                |      |       |      |      |    |   | 2 | TSASIGSLC[339]ADAR                  | 3 |
|                                                                                                                                                                                                                                                                                |      |       |      |      |    |   | 2 | TSASIGSLC[330]ADAR                  | 1 |
|                                                                                                                                                                                                                                                                                |      |       |      |      |    |   | 2 | TSASIGSLC[330]ADAR                  | 1 |
|                                                                                                                                                                                                                                                                                |      |       |      |      |    |   | 2 | TSASIGSLC[339]ADAR                  | 3 |
| MYST4_HUMAN (Q8WYB5) Histone acetyltransferase MYST4 (EC 2.3.1.48) (EC 2.3.1.-) (MYST protein 4) (MOZ, YBF2/SAS3, SAS2 and TIP60 protein 4) (Histone acetyltransferase MOZ2) (Monocytic leukemia zinc finger protein-related factor) (Histone acetyltransferase) [MASS=231343] | 0.00 | 0.77  | *    | *    | *  | 1 | 3 | INIKQESADVNVIGNK                    | 1 |
|                                                                                                                                                                                                                                                                                |      |       |      |      |    |   |   |                                     |   |
| N4BM_HUMAN (O95298) NADH-ubiquinone oxidoreductase subunit B14.5b (EC 1.6.5.3) (EC 1.6.99.3) (Complex I-B14.5b) (CI-B14.5b) [MASS=14187]                                                                                                                                       | *    | 5.88  | *    | *    | *  | 1 | 2 | EM[147]FGYMK                        | 1 |
| NAC2_HUMAN (Q9UPR5) Sodium/calcium exchanger 2 precursor (Na <sup>+</sup> )/Ca <sup>2+</sup> -exchange protein 2) [MASS=100367]                                                                                                                                                | 0.68 | 1.52  | 0.60 | 0.00 | 1  | 1 | 2 | IAEM[147]GKPVLGENC[330]R            | 1 |
| NADE1_HUMAN (Q6IA69) Glutamine-dependent NAD <sup>+</sup> synthetase (EC 6.3.5.1) (NAD <sup>+</sup> synthase [glutamine-hydrolyzing]) (NAD <sup>+</sup> synthetase 1) [MASS=79293]                                                                                             | 0.00 | 10.62 | *    | *    | *  | 4 | 2 | SGNEEVLADVRTIVNQISYTPQDPRDLC[330]GR | 1 |
|                                                                                                                                                                                                                                                                                |      |       |      |      |    |   | 2 | MVLAYLFAQLSLWSR                     | 1 |
|                                                                                                                                                                                                                                                                                |      |       |      |      |    |   | 2 | AVMGIFSLVTGKSPLFAAHGGSSR            | 1 |
|                                                                                                                                                                                                                                                                                |      |       |      |      |    |   | 1 | NLAASR                              | 1 |

|                                                                                                                                                             |                       |      |      |      |    |   |   |                                               |   |
|-------------------------------------------------------------------------------------------------------------------------------------------------------------|-----------------------|------|------|------|----|---|---|-----------------------------------------------|---|
| NAL14_HUMAN (Q86W24) NACHT, LRR and PYD-containing protein 14 (Nucleotide-binding oligomerization domain protein 5) [MASS=124732]                           | *                     | 7.04 | *    | *    | *  | 4 | 2 | SAM[147]NILHHELHPNC[330]K                     | 1 |
|                                                                                                                                                             |                       |      |      |      |    |   | 3 | LLEHLFDVDVKTGAQPQIVVLQGAAGVGKTTLVR            | 1 |
|                                                                                                                                                             |                       |      |      |      |    |   | 3 | KVM[147]LPEASLLVTTRLTTSK                      | 1 |
|                                                                                                                                                             |                       |      |      |      |    |   | 2 | YVFYLNGR                                      | 1 |
| NALP6_HUMAN (P59044) NACHT, LRR and PYD-containing protein 6 (PYRIN-containing APAF1-like protein 5) [MASS=98733]                                           | *                     | 4.26 | *    | *    | *  | 2 | 2 | QALC[339]RFPELALQR                            | 1 |
|                                                                                                                                                             |                       |      |      |      |    |   | 3 | MDVAVLSYC[330]VRC[330]C[330]PAGQALRLISC[330]R | 1 |
| NBEAL_HUMAN (Q6ZS30) Neurobeachin-like 1 (Amyotrophic lateral sclerosis 2 chromosomal region candidate gene 17 protein) [MASS=150732]                       | *                     | 2.44 | *    | *    | *  | 2 | 3 | M[147]RLKLVPNYNFK                             | 1 |
|                                                                                                                                                             |                       |      |      |      |    |   | 3 | GNLQVC[330]AM[147]ASAKLNTLLQTK                | 1 |
|                                                                                                                                                             |                       |      |      |      |    |   | 2 | FFLC[330]QVAGDAK                              | 3 |
| NCA11_HUMAN (P13591) Neural cell adhesion molecule 1, 140 kDa isoform precursor (N-CAM 140) (NCAM-140) (CD56 antigen) [MASS=93360]                          | 1.00                  | 9.91 | 0.39 | 0.44 | 12 | 5 | 3 | GPVEAKPEC[339]QETETKPAPAEVK                   | 1 |
|                                                                                                                                                             |                       |      |      |      |    |   | 2 | KVDKNDEAEYIC[330]IAENK                        | 2 |
|                                                                                                                                                             |                       |      |      |      |    |   | 2 | FFLC[339]QVAGDAK                              | 1 |
|                                                                                                                                                             |                       |      |      |      |    |   | 3 | KVDKNDEAEYIC[330]IAENK                        | 1 |
|                                                                                                                                                             |                       |      |      |      |    |   | 2 | LEGQMGEDGNSIKVNLIK                            | 1 |
|                                                                                                                                                             |                       |      |      |      |    |   | 3 | GPVEAKPEC[330]QETETKPAPAEVK                   | 1 |
|                                                                                                                                                             |                       |      |      |      |    |   | 1 | FFLC[330]QVAGDAK                              | 1 |
|                                                                                                                                                             |                       |      |      |      |    |   | 2 | KVDKNDEAEYIC[339]IAENK                        | 1 |
| 2                                                                                                                                                           | VDKNDEAEYIC[330]IAENK | 1    |      |      |    |   |   |                                               |   |
| NCAM2_HUMAN (O15394) Neural cell adhesion molecule 2 precursor (N-CAM 2) [MASS=92932]                                                                       | *                     | 2.03 | *    | *    | *  | 1 | 3 | AVDGFTFTEGDKSPDGR                             | 2 |
| NCKX5_HUMAN (Q71RS6) Sodium/potassium/calcium exchanger 5 precursor (Na(+)/K(+)/Ca(2+)-exchange protein 5) (Solute carrier family 24 member 5) [MASS=54888] | *                     | 5.80 | *    | *    | *  | 1 | 3 | KGKGDMA MSNIVGSNVFDMLC[330]LGIPWFIK           | 1 |
| NCS1_HUMAN (P62166) Neuronal calcium sensor 1 (NCS-1) (Frequenin homolog) (Frequenin-like protein) (Frequenin-like ubiquitous protein) [MASS=21747]         | 0.00                  | 7.41 | 1.48 | 0.00 | 1  | 1 | 2 | DC[339]PSGQLDAAGFQK                           | 1 |



|                                                                                                                                                                                                                                                           |      |       |      |      |   |   |   |                                              |   |
|-----------------------------------------------------------------------------------------------------------------------------------------------------------------------------------------------------------------------------------------------------------|------|-------|------|------|---|---|---|----------------------------------------------|---|
| NDRG1_HUMAN (Q92597) Protein NDRG1 (N-myc downstream-regulated gene 1 protein) (Differentiation-related gene 1 protein) (DRG-1) (Reducing agents and tunicamycin-responsive protein) (RTP) (Nickel-specific induction protein Cap43) (Rit42) [MASS=42835] | *    | 8.38  | *    | *    | * | 1 | 3 | SRSHTSEGAHLDITPNSGAAGNSAGPKSM[147]EVSC[339]  | 1 |
| NDRG2_HUMAN (Q9UN36) Protein NDRG2 (Protein Syld709613) [MASS=40798]                                                                                                                                                                                      | 1.00 | 18.60 | 0.49 | 0.36 | 3 | 3 | 3 | LTEAFKYFLQGM[147]GYM[147]ASSC[330]M[147]TRLR | 1 |
|                                                                                                                                                                                                                                                           |      |       |      |      |   |   | 2 | SC[330]FQPLFQFEDMQEIIQNFVR                   | 1 |
|                                                                                                                                                                                                                                                           |      |       |      |      |   |   | 3 | C[339]PVM[147]LVVGDQAPHEDAVVEC[339]NSK       | 1 |
|                                                                                                                                                                                                                                                           |      |       |      |      |   |   | 3 | SC[330]FQPLFQFEDM[147]QEIIQNFVR              | 1 |
| NDUA2_HUMAN (O43678) NADH dehydrogenase [ubiquinone] 1 alpha subcomplex subunit 2 (EC 1.6.5.3) (EC 1.6.99.3) (NADH-ubiquinone oxidoreductase B8 subunit) (Complex I-B8) (CI-B8) [MASS=10790]                                                              | 1.00 | 37.76 | 1.05 | 0.07 | 3 | 2 | 2 | IHLC[339]QR                                  | 1 |
|                                                                                                                                                                                                                                                           |      |       |      |      |   |   | 3 | YAFGQETNVPLNNFSADQVTRALENVLSGKA              | 1 |
|                                                                                                                                                                                                                                                           |      |       |      |      |   |   | 2 | IHLC[330]QR                                  | 2 |
| NDUA5_HUMAN (Q16718) NADH dehydrogenase [ubiquinone] 1 alpha subcomplex subunit 5 (EC 1.6.5.3) (EC 1.6.99.3) (NADH-ubiquinone oxidoreductase 13 kDa-B subunit) (Complex I-13Kd-B) (CI-13Kd-B) (Complex I subunit B13) [MASS=13327]                        | 1.00 | 13.91 | 1.84 | 0.07 | 4 | 1 | 2 | TTGLVGLAVC[339]NTPHER                        | 2 |
|                                                                                                                                                                                                                                                           |      |       |      |      |   |   | 2 | TTGLVGLAVC[330]NTPHER                        | 2 |
| NDUA8_HUMAN (P51970) NADH dehydrogenase [ubiquinone] 1 alpha subcomplex subunit 8 (EC 1.6.5.3) (EC 1.6.99.3) (NADH-ubiquinone oxidoreductase 19 kDa subunit) (Complex I-19KD) (CI-19KD) (Complex I-PGIV) (CI-PGIV) [MASS=19974]                           | 0.99 | 4.09  | 1.65 | 0.00 | 1 | 1 | 1 | C[339]ALDFFR                                 | 1 |
| NDUAA_HUMAN (O95299) NADH dehydrogenase [ubiquinone] 1 alpha subcomplex subunit 10, mitochondrial precursor (EC 1.6.5.3) (EC 1.6.99.3) (NADH-ubiquinone oxidoreductase 42 kDa subunit) (Complex I-42KD) (CI-42KD) [MASS=40750]                            | 1.00 | 3.10  | 1.56 | 0.00 | 2 | 1 | 2 | KQC[339]VDHYNEVK                             | 1 |
|                                                                                                                                                                                                                                                           |      |       |      |      |   |   | 2 | KQC[330]VDHYNEVK                             | 1 |

|                                                                                                                                                                                                                             |      |       |      |      |   |    |                                           |                                                                                                                                                                                                                                         |                                      |
|-----------------------------------------------------------------------------------------------------------------------------------------------------------------------------------------------------------------------------|------|-------|------|------|---|----|-------------------------------------------|-----------------------------------------------------------------------------------------------------------------------------------------------------------------------------------------------------------------------------------------|--------------------------------------|
| NDUAB_HUMAN (Q86Y39) NADH dehydrogenase [ubiquinone] 1 alpha subcomplex subunit 11 (EC 1.6.5.3) (EC 1.6.99.3) (NADH-ubiquinone oxidoreductase subunit B14.7) (Complex I-B14.7) (CI-B14.7) [MASS=14721]                      | 0.95 | 16.43 | 0.86 | 0.00 | 1 | 1  | 2                                         | EKPDDPLNYFLGGC[339]AGGLTLGAR                                                                                                                                                                                                            | 1                                    |
| NDUB7_HUMAN (P17568) NADH dehydrogenase [ubiquinone] 1 beta subcomplex subunit 7 (EC 1.6.5.3) (EC 1.6.99.3) (NADH-ubiquinone oxidoreductase B18 subunit) (Complex I-B18) (CI-B18) (Cell adhesion protein SQM1) [MASS=16271] | 1.00 | 13.97 | 1.20 | 0.04 | 6 | 2  | 2<br>3<br>3<br>2<br>2                     | DYC[330]AHHLIR<br>DYC[339]AHHLIR<br>DYC[330]AHHLIR<br>DSFPNFLAC[339]K<br>DYC[339]AHHLIR                                                                                                                                                 | 1<br>1<br>1<br>1<br>2                |
| NDUBA_HUMAN (O96000) NADH dehydrogenase [ubiquinone] 1 beta subcomplex subunit 10 (EC 1.6.5.3) (EC 1.6.99.3) (NADH-ubiquinone oxidoreductase PDSW subunit) (Complex I-PDSW) (CI-PDSW) [MASS=20645]                          | *    | 9.36  | *    | *    | * | 1  | 3                                         | EEDIMC[330]M[147]YEAEM[147]QWKR                                                                                                                                                                                                         | 1                                    |
|                                                                                                                                                                                                                             |      |       |      |      |   |    | 3<br>2                                    | SSLQQSDFEYKLDREFLK<br>SLQDDPKLVLSMNVAK                                                                                                                                                                                                  | 1<br>2                               |
| NEBU_HUMAN (P20929) Nebulin [MASS=773208]                                                                                                                                                                                   | *    | 3.16  | *    | *    | * | 11 | 1<br>3<br>2<br>3<br>2<br>3<br>2<br>2<br>2 | AAKASR<br>YSTLMDSMNMVLAQNNAKIM[147]NEHLYKQAWQWADK<br>KQIQGKAAYVLDTPEMR<br>KKGHYLAGKVIGEFPGVVHC[330]LDFQK<br>NSKGGKITVVQDTPEILR<br>GHYLAGKVIGEFPGVVHC[339]LDFQKMR<br>QKSIFTSVPDTPDLLRAK<br>ENM[147]GKGTPLPVTPEMER<br>NKGKADYNVLPASENPQLR | 1<br>1<br>1<br>1<br>1<br>1<br>1<br>1 |
| NEGR1_HUMAN (Q7Z3B1) Neuronal growth regulator 1 precursor [MASS=38719]                                                                                                                                                     | 0.99 | 7.91  | 0.48 | 0.00 | 1 | 1  | 3                                         | DYSLQIQNVDTVDDGPYTC[330]SVQTQHTPR                                                                                                                                                                                                       | 1                                    |
| NEK4_HUMAN (P51957) Serine/threonine-protein kinase Nek4 (EC 2.7.11.1) (NimA-related protein kinase 4) (Serine/threonine-protein kinase 2) (Serine/threonine-protein kinase NRK2) [MASS=94571]                              | 0.00 | 2.73  | 0.30 | 0.00 | 1 | 1  | 3                                         | VAGITGVC[330]HHAQDQVAGEC[330]IIEK                                                                                                                                                                                                       | 1                                    |

|                                                                                                                                                                              |                                |       |      |      |   |   |   |                                             |   |
|------------------------------------------------------------------------------------------------------------------------------------------------------------------------------|--------------------------------|-------|------|------|---|---|---|---------------------------------------------|---|
| NELL2_HUMAN (Q99435) Protein kinase C-binding protein NELL2 precursor (NEL-like protein 2) (Nel-related protein 2) [MASS=91346]                                              | 0.00                           | 1.23  | 3.93 | 0.00 | 1 | 1 | 2 | TC[339]LDEM[147]NVVR                        | 1 |
| NFASC_HUMAN (O94856) Neurofascin precursor [MASS=150026]                                                                                                                     | 1.00                           | 4.01  | 0.82 | 0.26 | 2 | 4 | 2 | RGTTVQLEC[330]R                             | 1 |
|                                                                                                                                                                              |                                |       |      |      |   |   | 2 | GDGPRSETKEFTTPEGVPSAPR                      | 1 |
|                                                                                                                                                                              |                                |       |      |      |   |   | 2 | LDC[330]PFFGSP IPTLR                        | 1 |
|                                                                                                                                                                              |                                |       |      |      |   |   | 2 | VKHDPSLK                                    | 1 |
| NFIB_HUMAN (O00712) Nuclear factor 1 B-type (Nuclear factor 1/B) (NF1-B) (NF1-B) (NF1/B) (CCAAT-box-binding transcription factor) (CTF) (TGGCA-binding protein) [MASS=47442] | *                              | 3.33  | *    | *    | * | 1 | 2 | HPC[339]C[339]VLSNPDQK GK                   | 1 |
| NFS1_HUMAN (Q9Y697) Cysteine desulfurase, mitochondrial precursor (EC 2.8.1.7) [MASS=50195]                                                                                  | 0.46                           | 5.47  | 1.19 | 0.00 | 1 | 2 | 2 | VLDAMPLPYLINYYGNPHSR                        | 1 |
|                                                                                                                                                                              |                                |       |      |      |   |   | 2 | C[339]IQHVK                                 | 1 |
| NIFUN_HUMAN (Q9H1K1) NifU-like N-terminal domain-containing protein, mitochondrial precursor (NifU-like protein) (Iron-sulfur cluster assembly enzyme ISCU) [MASS=17937]     | *                              | 11.38 | *    | *    | * | 1 | 2 | TFGC[339]GSAIASSSLATEWVK                    | 1 |
| NIPS1_HUMAN (Q9BPW8) Protein NipSnap1 [MASS=33310]                                                                                                                           | 0.45                           | 4.93  | 0.42 | 0.00 | 1 | 1 | 2 | FSGGYPALMDC[330]M[147]NK                    | 1 |
|                                                                                                                                                                              |                                |       |      |      |   |   | 2 | LQFHNVKPEC[339]LEAYNK                       | 2 |
| NIPS2_HUMAN (O75323) Protein NipSnap2 (Glioblastoma amplified sequence) [MASS=33742]                                                                                         | 1.00                           | 9.09  | 1.00 | 0.12 | 5 | 2 | 3 | LQFHNVKPEC[339]LEAYNK                       | 1 |
|                                                                                                                                                                              |                                |       |      |      |   |   | 3 | LQFHNVKPEC[330]LEAYNK                       | 1 |
|                                                                                                                                                                              |                                |       |      |      |   |   | 1 | DAHSNLLAKK                                  | 1 |
|                                                                                                                                                                              |                                |       |      |      |   |   | 2 | LQFHNVKPEC[330]LEAYNK                       | 1 |
| NKRF_HUMAN (O15226) NF-kappa-B-repressing factor (NFkB-repressing factor) (Transcription factor NRF) (ITBA4 protein) [MASS=77672]                                            | *                              | 4.49  | *    | *    | * | 2 | 2 | MSIEYKYEMM[147]PNRTWR                       | 1 |
|                                                                                                                                                                              |                                |       |      |      |   |   | 2 | VILESEVIAEAVGVK                             | 1 |
| NKTR_HUMAN (P30414) NK-tumor recognition protein (Natural-killer cells cyclophilin-related protein) (NK-TR protein) [MASS=165675]                                            | 0.00                           | 5.40  | 1.68 | 0.02 | 2 | 4 | 3 | TSTSDSEGSC[339]SSENNRGKPKQK                 | 1 |
|                                                                                                                                                                              |                                |       |      |      |   |   | 2 | EPVGRIMFQLFSDIC[339]PK                      | 1 |
|                                                                                                                                                                              |                                |       |      |      |   |   | 2 | EPVGRIMFQLFSDIC[330]PK                      | 2 |
|                                                                                                                                                                              |                                |       |      |      |   |   | 2 | GSTFHRVVKNFMIQGGDFSEGNGK                    | 1 |
| NKX32_HUMAN (P78367) Homeobox protein Nkx-3.2 (Bagpipe homeobox protein homolog 1) [MASS=34814]                                                                              | *                              | 18.32 | *    | *    | * | 3 | 2 | KNYAGSKWDESEN SER                           | 1 |
|                                                                                                                                                                              |                                |       |      |      |   |   | 1 | TEDDGVGPR                                   | 1 |
|                                                                                                                                                                              |                                |       |      |      |   |   | 3 | EERGGLAAP EGRPAPGGTAASVAAAPAVC[330]C[339]WR | 1 |
| 2                                                                                                                                                                            | PAPGGTAASVAAAPAVC[339]C[339]WR | 1     |      |      |   |   |   |                                             |   |

|                                                                                                                                                                                                                      |                       |      |      |      |   |   |   |                                     |   |
|----------------------------------------------------------------------------------------------------------------------------------------------------------------------------------------------------------------------|-----------------------|------|------|------|---|---|---|-------------------------------------|---|
| NLTP_HUMAN (P22307) Nonspecific lipid-transfer protein (EC 2.3.1.176) (Propanoyl-CoA C-acyltransferase) (NSL-TP) (Sterol carrier protein 2) (SCP-2) (Sterol carrier protein X) (SCP-X) (SCP-chi) (SCPX) [MASS=58993] | *                     | 4.20 | *    | *    | * | 1 | 2 | ITGNMGLAMKLQNLQLQPGNAKL             | 1 |
| NMUR2_HUMAN (Q9GZQ4) Neuromedin U receptor 2 (NMU-R2) (G-protein coupled receptor TGR-1) (G-protein coupled receptor FM-4) [MASS=47726]                                                                              | 0.00                  | 4.82 | 1.81 | 0.00 | 1 | 1 | 2 | MLFVLVLVFAIC[339]WAPFHIDR           | 1 |
| NNTM_HUMAN (Q13423) NAD(P) transhydrogenase, mitochondrial precursor (EC 1.6.1.2) (Pyridine nucleotide transhydrogenase) (Nicotinamide nucleotide transhydrogenase) [MASS=113895]                                    | 1.00                  | 5.52 | 0.96 | 0.10 | 6 | 4 | 2 | VPPAKILIVGGGVAGLASAGAAK             | 1 |
|                                                                                                                                                                                                                      |                       |      |      |      |   |   | 2 | FFTGQITAAGK                         | 1 |
|                                                                                                                                                                                                                      |                       |      |      |      |   |   | 2 | KTC[339]DALQAK                      | 2 |
|                                                                                                                                                                                                                      |                       |      |      |      |   |   | 2 | EANSIIITPGYGLC[339]AAK              | 2 |
| 2                                                                                                                                                                                                                    | KTC[330]DALQAK        | 2    |      |      |   |   |   |                                     |   |
| NOP14_HUMAN (P78316) Probable nucleolar complex protein 14 [MASS=97668]                                                                                                                                              | *                     | 1.40 | *    | *    | * | 1 | 2 | VLEFGRKQGSSK                        | 1 |
| NOP5_HUMAN (Q9Y2X3) Nucleolar protein NOP5 (Nucleolar protein 5) (NOP58) [MASS=59578]                                                                                                                                | *                     | 8.88 | *    | *    | * | 2 | 2 | FSADKVDTM[147]IVQAISLLDDLDKELNNYIMR | 1 |
|                                                                                                                                                                                                                      |                       |      |      |      |   |   | 2 | TYDPSGDSTLPTC[339]SKKR              | 1 |
| NOS1_HUMAN (P29475) Nitric-oxide synthase, brain (EC 1.14.13.39) (NOS type I) (Neuronal NOS) (N-NOS) (nNOS) (Constitutive NOS) (NC-NOS) (bNOS) [MASS=160969]                                                         | *                     | 1.95 | *    | *    | * | 2 | 3 | DNFESAGPLANVRFVSVFGLGSR             | 1 |
|                                                                                                                                                                                                                      |                       |      |      |      |   |   | 2 | MRDDNR                              | 1 |
|                                                                                                                                                                                                                      |                       |      |      |      |   |   | 2 | GGGAYSHC[339]RSLSGVGAGGGPTPRGR      | 1 |
| 3                                                                                                                                                                                                                    | C[339]SC[330]PHSSPGPR | 9    |      |      |   |   |   |                                     |   |
| NOTC4_HUMAN (Q99466) Neurogenic locus notch homolog protein 4 precursor (Notch 4) (hNotch4) [Contains: Notch 4 extracellular truncation; Notch 4 intracellular domain] [MASS=209621]                                 | *                     | 1.80 | *    | *    | * | 2 | 3 | C[330]SC[339]PHSSPGPR               | 1 |
|                                                                                                                                                                                                                      |                       |      |      |      |   |   | 3 | C[330]SC[339]PHSSPGPR               | 1 |

|                                                                                                                                                                                                                                    |      |       |      |      |   |   |   |                                                  |   |
|------------------------------------------------------------------------------------------------------------------------------------------------------------------------------------------------------------------------------------|------|-------|------|------|---|---|---|--------------------------------------------------|---|
| NOV_HUMAN (P48745) Protein NOV homolog precursor (NovH) (Nephroblastoma overexpressed gene protein homolog) [MASS=39162]                                                                                                           | 0.00 | 5.04  | 2.74 | 0.00 | 1 | 1 | 2 | AIHLQFKNC[339]TSLHTYKPR                          | 1 |
| NOX3_HUMAN (Q9HBY0) NADPH oxidase 3 (EC 1.6.3.-) (gp91phox homolog 3) (GP91-3) (Mitogenic oxidase 2) [MASS=64934]                                                                                                                  | *    | 4.05  | *    | *    | * | 1 | 3 | LVAYGIAVNATIHIVAHFFNLER                          | 1 |
| NP1L4_HUMAN (Q99733) Nucleosome assembly protein 1-like 4 (Nucleosome assembly protein 2) (NAP2) [MASS=42823]                                                                                                                      | 0.73 | 1.87  | 0.85 | 0.00 | 1 | 1 | 2 | C[339]AHIEAK                                     | 1 |
| NPC1_HUMAN (O15118) Niemann-Pick C1 protein precursor [MASS=142166]                                                                                                                                                                | *    | 1.25  | *    | *    | * | 1 | 3 | FFKNSYSPLLLKDWM[147]R                            | 1 |
| NPHP1_HUMAN (O15259) Nephrocystin-1 (Juvenile nephronophthisis 1 protein) [MASS=83299]                                                                                                                                             | *    | 4.51  | *    | *    | * | 1 | 3 | DRMSLQSTDILISHPM[147]LATFPM[147]LLEQPDVMDALR     | 1 |
| NPT3_HUMAN (O00624) Sodium-dependent phosphate transport protein 3 (Sodium/phosphate cotransporter 3) (Na(+)/Pi cotransporter 3) (Solute carrier family 18 member 2) [MASS=47350]                                                  | 0.00 | 1.83  | *    | *    | * | 1 | 1 | M[147]DGKPATR                                    | 1 |
| NPTN_HUMAN (Q9Y639) Neuroplastin precursor (Stromal cell-derived receptor 1) (SDR-1) [MASS=31291]                                                                                                                                  | 1.00 | 11.70 | 0.38 | 0.01 | 5 | 2 | 2 | SENKNEGQDATM[147]YC[330]K                        | 1 |
|                                                                                                                                                                                                                                    |      |       |      |      |   |   | 2 | AEDSGEYHC[339]VYHFVSAPK                          | 2 |
|                                                                                                                                                                                                                                    |      |       |      |      |   |   | 2 | AEDSGEYHC[330]VYHFVSAPK                          | 2 |
| NR4A3_HUMAN (Q92570) Orphan nuclear receptor NR4A3 (Nuclear hormone receptor NOR-1) (Neuron-derived orphan receptor 1) (Mitogen-induced nuclear orphan receptor) [MASS=68229]                                                      | 0.00 | 4.95  | 1.33 | 0.00 | 1 | 1 | 3 | YC[339]PTDQAAAGTDAEHVQQFYNLLTASIDVSR             | 1 |
| NRG2_HUMAN (O14511) Pro-neuregulin-2, membrane-bound isoform precursor (Pro-NRG2) [Contains: Neuregulin-2 (NRG-2) (Neural- and thymus-derived activator for ERBB kinases) (NTAK) (Divergent of neuregulin-1) (DON-1)] [MASS=91678] | *    | 4.71  | *    | *    | * | 2 | 2 | MRQVC[330]C[339]SALPPPPLEK                       | 1 |
|                                                                                                                                                                                                                                    |      |       |      |      |   |   | 2 | SDSPPLC[339]PAADSRYYSLDSHSTR                     | 1 |
| NRX1A_HUMAN (Q9ULB1) Neurexin-1-alpha precursor (Neurexin I-alpha) [MASS=161882]                                                                                                                                                   | *    | 2.10  | *    | *    | * | 1 | 2 | HPQM[147]IKVDFFAIEM[147]LDGHLYL LLDLM[147]GSGTIK | 1 |

|                                                                                                                                                                              |                 |       |      |      |    |   |   |                                         |   |
|------------------------------------------------------------------------------------------------------------------------------------------------------------------------------|-----------------|-------|------|------|----|---|---|-----------------------------------------|---|
| NRX3A_HUMAN (Q9Y4C0) Neurexin-3-alpha precursor (Neurexin III-alpha) [MASS=169922]                                                                                           | *               | 7.01  | *    | *    | *  | 5 | 2 | PSTRSDRLAVGFSTTVK                       | 1 |
|                                                                                                                                                                              |                 |       |      |      |    |   | 3 | NNAVVC[330]KDGWNRFC[339]DC[330]JGTGYWGR | 1 |
|                                                                                                                                                                              |                 |       |      |      |    |   | 2 | IADTKMKIYGEVVK                          | 1 |
|                                                                                                                                                                              |                 |       |      |      |    |   | 2 | NLDLKGDLYM[147]AGLAQGM[147]YSNLPKLVASR  | 1 |
|                                                                                                                                                                              |                 |       |      |      |    |   | 2 | RMGSISFDFRTTEPNGLILFTHGK                | 1 |
| NSF_HUMAN (P46459) Vesicle-fusing ATPase (EC 3.6.4.6) (Vesicular-fusion protein NSF) (N-ethylmaleimide sensitive fusion protein) (NEM-sensitive fusion protein) [MASS=82654] | 1.00            | 9.54  | 0.61 | 0.22 | 4  | 5 | 2 | GILLYGPPGC[330]GK                       | 1 |
|                                                                                                                                                                              |                 |       |      |      |    |   | 2 | SQLSC[339]VVVDDIER                      | 1 |
|                                                                                                                                                                              |                 |       |      |      |    |   | 3 | LGANSGLHIIIFDEIDAIC[330]K               | 1 |
|                                                                                                                                                                              |                 |       |      |      |    |   | 2 | LGANSGLHIIIFDEIDAIC[330]K               | 1 |
|                                                                                                                                                                              |                 |       |      |      |    |   | 3 | APPQGRKLLIIGTTSR                        | 1 |
| 2                                                                                                                                                                            | MAGRSM[147]QAAR | 1     |      |      |    |   |   |                                         |   |
| NU214_HUMAN (P35658) Nuclear pore complex protein Nup214 (Nucleoporin Nup214) (214 kDa nucleoporin) (CAN protein) [MASS=213765]                                              | *               | 1.77  | *    | *    | *  | 2 | 2 | DSDPVM[147]AGIGEEIAHFQK                 | 1 |
|                                                                                                                                                                              |                 |       |      |      |    |   | 2 | PTLESTPVPSVSAPNIAMK                     | 1 |
| NU3M_HUMAN (P03897) NADH-ubiquinone oxidoreductase chain 3 (EC 1.6.5.3) (NADH dehydrogenase subunit 3) [MASS=13186]                                                          | 0.95            | 13.04 | 0.88 | 0.00 | 1  | 1 | 2 | STPYEC[330]GFDPM[147]SPAR               | 1 |
|                                                                                                                                                                              |                 |       |      |      |    |   | 2 | LSVAGNC[339]R                           | 1 |
| NUAM_HUMAN (P28331) NADH-ubiquinone oxidoreductase 75 kDa subunit, mitochondrial precursor (EC 1.6.5.3) (EC 1.6.99.3) (Complex I-75Kd) (CI-75Kd) [MASS=79467]                | 1.00            | 18.98 | 1.17 | 0.03 | 10 | 8 | 2 | FC[339]YHER                             | 2 |
|                                                                                                                                                                              |                 |       |      |      |    |   | 2 | VVAAC[339]AM[147]PVM[147]K              | 1 |
|                                                                                                                                                                              |                 |       |      |      |    |   | 3 | DC[330]FIIYQGHGHDVGAPIADVILPGAAYTEK     | 1 |
|                                                                                                                                                                              |                 |       |      |      |    |   | 3 | MC[330]LVEIEKAPKVVAAC[339]AM[147]PVMK   | 1 |
|                                                                                                                                                                              |                 |       |      |      |    |   | 2 | NIGPLVKTIMTRC[330]IQC[339]TR            | 1 |
|                                                                                                                                                                              |                 |       |      |      |    |   | 2 | VVAAC[330]AM[147]PVM[147]K              | 1 |
|                                                                                                                                                                              |                 |       |      |      |    |   | 2 | LSVAGNC[330]R                           | 1 |
|                                                                                                                                                                              |                 |       |      |      |    |   | 2 | DC[339]FIIYQGHGHDVGAPIADVILPGAAYTEK     | 1 |
|                                                                                                                                                                              |                 |       |      |      |    |   | 3 | TESIDVMDAVGSNIVVSTRTGEVMRILPR           | 1 |
|                                                                                                                                                                              |                 |       |      |      |    |   | 2 | VLFLLGADGGC[339]ITR                     | 1 |
|                                                                                                                                                                              |                 |       |      |      |    |   | 3 | MC[330]LVEIEKAPKVVAAC[330]AMPVM[147]K   | 1 |
|                                                                                                                                                                              |                 |       |      |      |    |   | 2 | FC[330]YHER                             | 1 |

|                                                                                                                                                                                                   |      |       |      |      |   |   |   |                                             |   |
|---------------------------------------------------------------------------------------------------------------------------------------------------------------------------------------------------|------|-------|------|------|---|---|---|---------------------------------------------|---|
| NUBM_HUMAN (P49821) NADH-ubiquinone oxidoreductase 51 kDa subunit, mitochondrial precursor (EC 1.6.5.3) (EC 1.6.99.3) (Complex I-51KD) (CI-51KD) (NADH dehydrogenase flavoprotein 1) [MASS=50817] | 1.00 | 22.20 | 0.90 | 0.53 | 8 | 6 | 2 | YLVVNADEGEPGTC[330]KDR                      | 1 |
|                                                                                                                                                                                                   |      |       |      |      |   |   | 2 | HESC[339]GQC[339]TPC[339]R                  | 1 |
|                                                                                                                                                                                                   |      |       |      |      |   |   | 2 | NAC[339]GSGYDFDFVVR                         | 1 |
|                                                                                                                                                                                                   |      |       |      |      |   |   | 2 | GAGAYIC[339]GEETALIESIEGK                   | 1 |
|                                                                                                                                                                                                   |      |       |      |      |   |   | 2 | LLEGC[330]LVGGR                             | 1 |
|                                                                                                                                                                                                   |      |       |      |      |   |   | 2 | NAC[330]GSGYDFDFVVR                         | 2 |
|                                                                                                                                                                                                   |      |       |      |      |   |   | 3 | SVC[330]ETVLM[147]DFDALVQAQTGLGTAIVVMDR     | 1 |
|                                                                                                                                                                                                   |      |       |      |      |   |   | 2 | GAGAYIC[330]GEETALIESIEGK                   | 1 |
|                                                                                                                                                                                                   |      |       |      |      |   |   | 2 | YLVVNADEGEPGTC[339]KDR                      | 1 |
| NUCM_HUMAN (O75306) NADH-ubiquinone oxidoreductase 49 kDa subunit, mitochondrial precursor (EC 1.6.5.3) (EC 1.6.99.3) (Complex I-49KD) (CI-49KD) [MASS=52545]                                     | 0.73 | 1.73  | 1.32 | 0.00 | 1 | 1 | 2 | IIAQC[339]LNK                               | 1 |
| NUHM_HUMAN (P19404) NADH-ubiquinone oxidoreductase 24 kDa subunit, mitochondrial precursor (EC 1.6.5.3) (EC 1.6.99.3) [MASS=27391]                                                                | 1.00 | 5.62  | 0.95 | 0.04 | 5 | 1 | 3 | YHIQVC[330]TTTTPC[330]M[147]LR              | 1 |
|                                                                                                                                                                                                   |      |       |      |      |   |   | 2 | YHIQVC[339]TTTTPC[339]M[147]LR              | 1 |
|                                                                                                                                                                                                   |      |       |      |      |   |   | 2 | YHIQVC[330]TTTTPC[330]MLR                   | 1 |
|                                                                                                                                                                                                   |      |       |      |      |   |   | 3 | YHIQVC[339]TTTTPC[339]M[147]LR              | 1 |
|                                                                                                                                                                                                   |      |       |      |      |   |   | 2 | YHIQVC[330]TTTTPC[330]M[147]LR              | 1 |
| NUIM_HUMAN (O00217) NADH-ubiquinone oxidoreductase 23 kDa subunit, mitochondrial precursor (EC 1.6.5.3) (EC 1.6.99.3) (Complex I-23KD) (CI-23KD) (TYKY subunit) [MASS=23705]                      | 1.00 | 21.90 | 1.27 | 0.04 | 4 | 3 | 2 | C[330]IAC[330]K                             | 1 |
|                                                                                                                                                                                                   |      |       |      |      |   |   | 3 | C[330]IAC[330]KLC[330]EAIC[330]PAQAITIEAEPR | 1 |
|                                                                                                                                                                                                   |      |       |      |      |   |   | 2 | C[339]IAC[339]K                             | 1 |
|                                                                                                                                                                                                   |      |       |      |      |   |   | 1 | C[339]IAC[339]K                             | 1 |
|                                                                                                                                                                                                   |      |       |      |      |   |   | 2 | LC[339]EAIC[339]PAQAITIEAEPR                | 1 |
| NUKM_HUMAN (O75251) NADH-ubiquinone oxidoreductase 20 kDa subunit, mitochondrial precursor (EC 1.6.5.3) (EC 1.6.99.3) (Complex I-20KD) (CI-20KD) (PSST subunit) [MASS=23563]                      | 0.71 | 12.68 | 1.12 | 0.00 | 1 | 1 | 3 | IVPVDIYIPGC[330]PPTAEALLYGILQLQR            | 1 |
| NUMM_HUMAN (O75380) NADH-ubiquinone oxidoreductase 13 kDa-A subunit, mitochondrial precursor (EC 1.6.5.3) (EC 1.6.99.3) (Complex I-13KD-A) (CI-13KD-A) [MASS=13712]                               | 1.00 | 21.77 | 0.82 | 0.05 | 7 | 2 | 3 | VIAC[339]DGGGGALGHPK                        | 1 |
|                                                                                                                                                                                                   |      |       |      |      |   |   | 2 | VIAC[330]DGGGGALGHPK                        | 2 |
|                                                                                                                                                                                                   |      |       |      |      |   |   | 2 | VIAC[339]DGGGGALGHPK                        | 2 |
|                                                                                                                                                                                                   |      |       |      |      |   |   | 3 | VIAC[330]DGGGGALGHPK                        | 1 |
|                                                                                                                                                                                                   |      |       |      |      |   |   | 2 | TGTC[339]GYC[339]GLQFR                      | 1 |
| NVL_HUMAN (O15381) Nuclear valosin-containing protein-like (Nuclear VCP-like protein) (NVLp) [MASS=95050]                                                                                         | *    | 4.67  | *    | *    | * | 2 | 2 | KGNPDSVSNTPEMEQR                            | 1 |
|                                                                                                                                                                                                   |      |       |      |      |   |   | 2 | KGNPDSVSNTPEMEQRETTSSTPR                    | 1 |
| O10G2_HUMAN (Q8NGC3) Olfactory receptor 10G2 [MASS=34472]                                                                                                                                         | 0.00 | 5.48  | 1.73 | 0.00 | 1 | 1 | 2 | YLAIC[339]QPLHYPVLM[147]NGR                 | 1 |

|                                                                                                                                                       |      |       |      |      |   |    |                                                                                                                                                                                              |                                                     |   |
|-------------------------------------------------------------------------------------------------------------------------------------------------------|------|-------|------|------|---|----|----------------------------------------------------------------------------------------------------------------------------------------------------------------------------------------------|-----------------------------------------------------|---|
| O51A4_HUMAN (Q8NGJ6) Olfactory receptor 51A4 [MASS=35256]                                                                                             | 0.00 | 9.27  | 5.29 | 0.00 | 1 | 1  | 3                                                                                                                                                                                            | HVSPLINVLM[147]ANVLLLVPPLTNPIVYC[339]VK             | 1 |
| O51F1_HUMAN (Q8NH61) Olfactory receptor 51F2 [MASS=37205]                                                                                             | *    | 7.27  | *    | *    | * | 1  | 3                                                                                                                                                                                            | IAKIGM[147]SM[147]LIRNVAVMLPVMLFVK                  | 1 |
| O51Q1_HUMAN (Q8NH59) Olfactory receptor 51Q1 [MASS=35747]                                                                                             | *    | 9.15  | *    | *    | * | 1  | 3                                                                                                                                                                                            | LRALNNC[339]LSHILAVLVLYIPM[147]VGVSMTHR             | 1 |
| O51T1_HUMAN (Q8NGJ9) Olfactory receptor 51T1 [MASS=36998]                                                                                             | 0.00 | 11.62 | 0.52 | 0.00 | 1 | 2  | 2 TIRQAMFQLLQSKGSWGFNVR<br>2 FVAIC[330]NPLNYATILTDR                                                                                                                                          | 1<br>1                                              |   |
| O52K1_HUMAN (Q8NGK4) Olfactory receptor 52K1 [MASS=35289]                                                                                             | *    | 6.69  | *    | *    | * | 1  | 2                                                                                                                                                                                            | IGMAAVAWAVTLMTPLPFLLR                               | 1 |
| OAT5_HUMAN (Q63ZE4) Solute carrier family 22 member 10 (Organic anion transporter 5) [MASS=59033]                                                     | 0.00 | 5.08  | 0.97 | 0.00 | 1 | 2  | 2 ISIPLDSNLRPEKC[330]R<br>3 C[339]LALLTLNHMGR                                                                                                                                                | 1<br>1                                              |   |
|                                                                                                                                                       |      |       |      |      |   |    | 2                                                                                                                                                                                            | LHVSLM[147]ENYPGTLQALGEPiR                          | 1 |
|                                                                                                                                                       |      |       |      |      |   |    | 3                                                                                                                                                                                            | FQQGPTC[330]HLAVRGPM[147]HTLTLGLRPEDSGLM[147]VFK    | 1 |
|                                                                                                                                                       |      |       |      |      |   |    | 2                                                                                                                                                                                            | ASLIVRERPAAIK                                       | 1 |
|                                                                                                                                                       |      |       |      |      |   |    | 3                                                                                                                                                                                            | VTLEDAGTVSFHVGTC[330]SSEAQLKVTAK                    | 1 |
|                                                                                                                                                       |      |       |      |      |   |    | 3                                                                                                                                                                                            | ASAELRIQSPM[147]LQAQEQC[330]HR                      | 1 |
| OBSCN_HUMAN (Q5VST9) Obscurin (Obscurin-myosin light chain kinase) (Obscurin-MLCK) (Obscurin-RhoGEF) [MASS=868479]                                    | 0.00 | 2.75  | 0.36 | 0.00 | 1 | 12 | 2 LMPADAGVYR<br>2 EAMRAEGAPASPPSTGTRTC[330]TVTEGK<br>2 GVLEEC[339]QVSRASAQVR<br>2 AAPVEWRK<br>2 LLGPKAPGPSTGDLTGPGPC[330]PR<br>2 LEVRVKPVVFLK<br>2 RVLLVRDVAR<br>2 ASAELRIQSPMLQAQEQC[339]HR | 1<br>1<br>1<br>1<br>1<br>1<br>1<br>1                |   |
| OCLN_HUMAN (Q16625) Occludin [MASS=59143]                                                                                                             | 0.00 | 5.94  | 1.37 | 0.00 | 1 | 1  | 3                                                                                                                                                                                            | GFM[147]LAM[147]AAFC[339]FIAALVIFVTSVIRSEM[147]SRTR | 1 |
| OCRL_HUMAN (Q01968) Inositol polyphosphate 5-phosphatase OCRL-1 (EC 3.1.3.36) (Lowe oculocerebrorenal syndrome protein) [MASS=104204]                 | 0.00 | 2.11  | 0.44 | 0.00 | 1 | 2  | 2 C[339]LDSAYDPR<br>3 LC[330]M[147]PDANEVK                                                                                                                                                   | 1<br>1                                              |   |
| OCTC_HUMAN (Q9UKG9) Peroxisomal carnitine O-octanoyltransferase (EC 2.3.1.137) (COT) [MASS=70178]                                                     | *    | 1.14  | *    | *    | * | 1  | 1                                                                                                                                                                                            | M[147]LFSTC[330]JK                                  | 1 |
| ODO1_HUMAN (Q02218) 2-oxoglutarate dehydrogenase E1 component, mitochondrial precursor (EC 1.2.4.2) (Alpha-ketoglutarate dehydrogenase) [MASS=113475] | 0.75 | 8.88  | 1.14 | 0.00 | 1 | 4  | 2 WVRQNGIVLLLPHGM[147]EGMGPEHSSARPER<br>2 FGLEGC[330]EVLIPALK<br>2 RNGTHNEM[147]DEPMFTQPLMYKQIR<br>3 ELEQIFC[339]QFDSKLEAADEGSGDVK                                                           | 1<br>1<br>1<br>1                                    |   |



|                                                                                                                                                                                                                                                                             |                       |       |      |      |   |   |   |                                               |   |
|-----------------------------------------------------------------------------------------------------------------------------------------------------------------------------------------------------------------------------------------------------------------------------|-----------------------|-------|------|------|---|---|---|-----------------------------------------------|---|
| ODP2_HUMAN (P10515) Dihydrolipoalysine-residue acetyltransferase component of pyruvate dehydrogenase complex, mitochondrial precursor (EC 2.3.1.12) (Pyruvate dehydrogenase complex E2 subunit) (PDCE2) (E2) (Dihydrolipoamide S-acetyltransferase component [MASS=65781])  | 0.69                  | 3.58  | 1.55 | 0.00 | 1 | 1 | 2 | DVPIGAIIC[339]ITVGKPEDIEAFK                   | 1 |
| ODPA_HUMAN (P08559) Pyruvate dehydrogenase E1 component alpha subunit, somatic form, mitochondrial precursor (EC 1.2.4.1) (PDHE1-A type I) [MASS=43295]                                                                                                                     | 1.00                  | 14.36 | 1.11 | 0.15 | 5 | 4 | 2 | KC[339]DLHR                                   | 1 |
|                                                                                                                                                                                                                                                                             |                       |       |      |      |   |   | 2 | C[339]DLHR                                    | 1 |
|                                                                                                                                                                                                                                                                             |                       |       |      |      |   |   | 1 | C[339]DLHR                                    | 1 |
|                                                                                                                                                                                                                                                                             |                       |       |      |      |   |   | 2 | VDGM[147]DILC[339]VR                          | 2 |
| ODPB_HUMAN (P11177) Pyruvate dehydrogenase E1 component subunit beta, mitochondrial precursor (EC 1.2.4.1) (PDHE1-B) [MASS=39219]                                                                                                                                           | 1.00                  | 14.76 | 0.99 | 0.04 | 2 | 3 | 3 | GKGGSM[147]HMYAKNFYGGNGIVGAQVPLGAGIALAC[330]K | 1 |
|                                                                                                                                                                                                                                                                             |                       |       |      |      |   |   | 2 | PVGHC[330]LEAAVLSK                            | 1 |
|                                                                                                                                                                                                                                                                             |                       |       |      |      |   |   | 2 | EGVEC[330]EVINM[147]R                         | 1 |
|                                                                                                                                                                                                                                                                             |                       |       |      |      |   |   | 3 | PVGHC[339]LEAAVLSKEGVEC[339]EVINMRTIR         | 1 |
| 2                                                                                                                                                                                                                                                                           | PVGHC[339]LEAAVLSK    | 1     |      |      |   |   |   |                                               |   |
| ODPX_HUMAN (O00330) Pyruvate dehydrogenase protein X component, mitochondrial precursor (Dihydrolipoamide dehydrogenase-binding protein of pyruvate dehydrogenase complex) (Lipoyl-containing pyruvate dehydrogenase complex component X) (E3-binding protein) [MASS=54122] | *                     | 4.19  | *    | *    | * | 1 | 2 | STVPHAYATADC[330]DLGAVLKVR                    | 1 |
| OMGP_HUMAN (P23515) Oligodendrocyte-myelin glycoprotein precursor [MASS=49608]                                                                                                                                                                                              | 0.97                  | 3.64  | 0.54 | 0.00 | 1 | 1 | 2 | AHVIGTPC[330]STQISSLK                         | 1 |
| OPA1_HUMAN (O60313) Dynamin-like 120 kDa protein, mitochondrial precursor (Optic atrophy 1 gene protein) [MASS=111657]                                                                                                                                                      | 1.00                  | 7.81  | 0.97 | 0.10 | 8 | 5 | 3 | TQEQC[330]VHNETKNELEK                         | 1 |
|                                                                                                                                                                                                                                                                             |                       |       |      |      |   |   | 2 | TQEQC[339]VHNETKNELEK                         | 1 |
|                                                                                                                                                                                                                                                                             |                       |       |      |      |   |   | 2 | C[330]NEEHPAYLASDEITTVR                       | 1 |
|                                                                                                                                                                                                                                                                             |                       |       |      |      |   |   | 2 | TALNHC[339]NLC[339]R                          | 1 |
|                                                                                                                                                                                                                                                                             |                       |       |      |      |   |   | 2 | C[330]NEEHPAYLASDEITTVRK                      | 1 |
|                                                                                                                                                                                                                                                                             |                       |       |      |      |   |   | 3 | TQEQC[339]VHNETKNELEK                         | 1 |
|                                                                                                                                                                                                                                                                             |                       |       |      |      |   |   | 2 | IFPRGSGEM[147]M[147]TR                        | 1 |
|                                                                                                                                                                                                                                                                             |                       |       |      |      |   |   | 2 | TALNHC[330]NLC[339]R                          | 1 |
| 2                                                                                                                                                                                                                                                                           | TALNHC[330]NLC[330]R  | 1     |      |      |   |   |   |                                               |   |
| 2                                                                                                                                                                                                                                                                           | TQEQC[330]VHNETKNELEK | 1     |      |      |   |   |   |                                               |   |

|                                                                                                                                                      |      |       |       |      |   |   |   |                                       |   |
|------------------------------------------------------------------------------------------------------------------------------------------------------|------|-------|-------|------|---|---|---|---------------------------------------|---|
| OPCM_HUMAN (Q14982) Opioid-binding protein/cell adhesion molecule precursor (OBCAM) (Opioid-binding cell adhesion molecule) (OPCML) [MASS=38007]     | 1.00 | 13.62 | 0.90  | 0.07 | 2 | 2 | 2 | DQSGEYEC[330]SALNDVAAPDVRK            | 1 |
|                                                                                                                                                      |      |       |       |      |   |   | 3 | DQSGEYEC[339]SALNDVAAPDVRK            | 1 |
|                                                                                                                                                      |      |       |       |      |   |   | 3 | GRMSTLTFNFVSEKDYGNVTC[339]VATNK       | 1 |
|                                                                                                                                                      |      |       |       |      |   |   | 3 | DQSGEYEC[330]SALNDVAAPDVRK            | 1 |
| OR4DB_HUMAN (Q8NGI4) Olfactory receptor 4D11 [MASS=34969]                                                                                            | 0.00 | 8.04  | 0.80  | 0.00 | 1 | 1 | 3 | NLAILDIC[330]FSSTTAPKVLDDLKSK         | 1 |
| OR4N4_HUMAN (Q8N0Y3) Olfactory receptor 4N4 [MASS=35822]                                                                                             | *    | 5.06  | *     | *    | * | 1 | 2 | AASEGKKNKAMSM[147]C[339]TTR           | 1 |
| OR6A2_HUMAN (O95222) Olfactory receptor 6A2 (Olfactory receptor 11-55) (OR11-55) (hP2 olfactory receptor) [MASS=36154]                               | 0.00 | 11.62 | 25.20 | 0.00 | 1 | 2 | 2 | ALC[339]C[339]TLHLYQHQPDPKKASR        | 2 |
|                                                                                                                                                      |      |       |       |      |   |   | 3 | YM[147]AIC[339]YPLHYPVIVSGR           | 1 |
| OR8S1_HUMAN (Q8NH09) Olfactory receptor 8S1 [MASS=39694]                                                                                             | *    | 1.67  | *     | *    | * | 1 | 1 | GERSLR                                | 1 |
| ORNT1_HUMAN (Q9Y619) Mitochondrial ornithine transporter 1 (Solute carrier family 25 member 15) [MASS=32736]                                         | 0.00 | 17.94 | 0.35  | 0.00 | 1 | 2 | 3 | LSDLQNAAGSFASAFALVLC[330]PTELVK       | 1 |
|                                                                                                                                                      |      |       |       |      |   |   | 3 | AFPANGALFLAYEYSRKLML[147]M[147]NQLEAY | 1 |
| OSBP1_HUMAN (P22059) Oxysterol-binding protein 1 [MASS=89420]                                                                                        | 0.00 | 6.82  | 1.10  | 0.00 | 1 | 3 | 2 | PFNPLLGETFELDR                        | 1 |
|                                                                                                                                                      |      |       |       |      |   |   | 3 | PNYSLNLWSIMKNC[330]IGKELSK            | 1 |
|                                                                                                                                                      |      |       |       |      |   |   | 2 | M[147]EC[339]FKVQPVIGENGGDARQR        | 1 |
|                                                                                                                                                      |      |       |       |      |   |   | 2 | QC[339]TM[147]EMATGEVDVPLVSIFK        | 1 |
|                                                                                                                                                      |      |       |       |      |   |   | 2 | DSQETDGLLPGSRPSSR                     | 1 |
| OTOF_HUMAN (Q9HC10) Otoferlin (Fer-1-like protein 2) [MASS=226735]                                                                                   | *    | 4.71  | *     | *    | * | 6 | 3 | GPIM[147]PVPMGIRPVLSKYR               | 1 |
|                                                                                                                                                      |      |       |       |      |   |   | 1 | RHTVRDK                               | 3 |
|                                                                                                                                                      |      |       |       |      |   |   | 2 | GVQSSLIHNYKK                          | 1 |
|                                                                                                                                                      |      |       |       |      |   |   | 2 | PITFEVTIGNYGNEVDGLSR                  | 1 |
| OVOL2_HUMAN (Q9BRP0) Transcription factor Ovo-like 2 (hOvo2) (Zinc finger protein 339) [MASS=30438]                                                  | *    | 4.73  | *     | *    | * | 1 | 2 | IHGVQQQYAYKQR                         | 1 |
| PA2G6_HUMAN (O60733) 85 kDa calcium-independent phospholipase A2 (EC 3.1.1.4) (iPLA2) (Cal-PLA2) (Group VI phospholipase A2) (GVI PLA2) [MASS=89902] | *    | 1.49  | *     | *    | * | 1 | 1 | PAFILGSMRDEK                          | 1 |
| PACN1_HUMAN (Q9BY11) Protein kinase C and casein kinase substrate in neurons protein 1 [MASS=50965]                                                  | 0.52 | 4.05  | 0.63  | 0.00 | 1 | 2 | 1 | AQKPWAKK                              | 1 |
|                                                                                                                                                      |      |       |       |      |   |   | 2 | AYHLAC[330]KEEK                       | 1 |

|                                                                                                                                                                                                                                                                            |      |       |      |      |   |   |                                                                                                               |                            |   |
|----------------------------------------------------------------------------------------------------------------------------------------------------------------------------------------------------------------------------------------------------------------------------|------|-------|------|------|---|---|---------------------------------------------------------------------------------------------------------------|----------------------------|---|
| PADI2_HUMAN (Q9Y2J8) Protein-arginine deiminase type-2 (EC 3.5.3.15) (Protein-arginine deiminase type II) (Peptidylarginine deiminase II) (PAD-H19) [MASS=75563]                                                                                                           | 0.55 | 3.16  | 1.76 | 0.00 | 1 | 1 | 3                                                                                                             | GLLEPLGLEC[339]TFIDDISAYHK | 1 |
| PADI3_HUMAN (Q9ULW8) Protein-arginine deiminase type-3 (EC 3.5.3.15) (Protein-arginine deiminase type III) (Peptidylarginine deiminase III) [MASS=74743]                                                                                                                   | 0.00 | 10.84 | 0.01 | 0.00 | 1 | 4 | 2 MLLASPGAC[330]FKLFQEK<br>2 MLLASPGAC[330]FK<br>3 KATAFFPDLVNMLVLGKHLGIPK<br>2 ATAFFPDLVNMLVLGKHLGIPK        | 1<br>1<br>1<br>1           |   |
| PANK4_HUMAN (Q9NVE7) Pantothenate kinase 4 (EC 2.7.1.33) (Pantothenic acid kinase 4) (hPanK4) [MASS=85990]                                                                                                                                                                 | *    | 4.27  | *    | *    | * | 3 | 2 FDELLHLASR<br>2 LLLVQTGSSSPC[339]LDLSR<br>1 SLLDTR                                                          | 1<br>1<br>1                |   |
| PAPS1_HUMAN (O43252) Bifunctional 3'-phosphoadenosine 5'-phosphosulfate synthetase 1 (PAPS synthetase 1) (PAPSS 1) (Sulfurylase kinase 1) (SK1) (SK 1) [Includes: Sulfate adenyltransferase (EC 2.7.7.4) (Sulfate adenylate transferase) (SAT) (ATP-sulfuryl) [MASS=70833] | *    | 9.46  | *    | *    | * | 3 | 3 EGQKPPEGFM[147]APKAWTVLTEYYK<br>3 VLTM[147]APGLITLEIVPFRVAAYNK<br>2 ATNVTYQAHHVSR                           | 1<br>1<br>1                |   |
| PARK7_HUMAN (Q99497) Protein DJ-1 (Oncogene DJ1) [MASS=19891]                                                                                                                                                                                                              | 1.00 | 28.57 | 0.65 | 0.19 | 5 | 3 | 2 VTVAGLAGKDPVQC[330]SR<br>3 GLIAAIC[330]AGPTALLAHEIGFGSK<br>2 DVVIC[339]PDASLEDAKK<br>2 DVVIC[330]PDASLEDAKK | 1<br>1<br>2<br>1           |   |
| PAX3_HUMAN (P23760) Paired box protein Pax-3 (HUP2) [MASS=52967]                                                                                                                                                                                                           | *    | 4.18  | *    | *    | * | 1 | 3 ILC[330]RYQETGSIRPGAIGGSK                                                                                   | 1                          |   |
| PAXI_HUMAN (P49023) Paxillin [MASS=64533]                                                                                                                                                                                                                                  | *    | 4.40  | *    | *    | * | 2 | 3 VGEEHVYSFPNK<br>2 ELDELMASLSDFK                                                                             | 1<br>1                     |   |
| PCCB_HUMAN (P05166) Propionyl-CoA carboxylase beta chain, mitochondrial precursor (EC 6.4.1.3) (PCCase subunit beta) (Propanoyl-CoA:carbon dioxide ligase subunit beta) [MASS=58205]                                                                                       | 0.51 | 5.75  | 3.28 | 0.00 | 1 | 1 | 3 FC[339]DAFNIPLITFVDVPGFLPGTAQEYGGIIR                                                                        | 1                          |   |
| PCD18_HUMAN (Q9HCL0) Protocadherin-18 precursor [MASS=125307]                                                                                                                                                                                                              | *    | 4.79  | *    | *    | * | 2 | 2 SYEIDVQAQDLGPNSIPAHC[339]JK<br>3 SYEIDVQAQDLGPNSIPAHC[330]KIIIKVVDVNDNK                                     | 1<br>1                     |   |
| PCD19_HUMAN (Q8TAB3) Protocadherin-19 precursor [MASS=126252]                                                                                                                                                                                                              | *    | 1.66  | *    | *    | * | 1 | 2 AHLIKSSSTFKDLEGNLTK                                                                                         | 1                          |   |
| PCDG5_HUMAN (Q9Y5G8) Protocadherin gamma A5 precursor (PCDH-gamma-A5) [MASS=100934]                                                                                                                                                                                        | *    | 2.36  | *    | *    | * | 1 | 3 SHLIFPQPNYADTLLSEESC[330]JEK                                                                                | 1                          |   |

|                                                                                                                                                                                                                                                                              |      |      |       |      |   |    |   |                                                                 |   |
|------------------------------------------------------------------------------------------------------------------------------------------------------------------------------------------------------------------------------------------------------------------------------|------|------|-------|------|---|----|---|-----------------------------------------------------------------|---|
| PCDLK_HUMAN (Q9BYE9) Protocadherin LKC precursor (PC-LKC) [MASS=141574]                                                                                                                                                                                                      | *    | 2.44 | *     | *    | * | 1  | 2 | TAAGVMP S A P A I P G T N M Y N T E R A N P M [147] L N L P N K | 1 |
|                                                                                                                                                                                                                                                                              |      |      |       |      |   |    | 2 | SSC[339]SEYSPSIESDPEGFEISPEK                                    | 1 |
|                                                                                                                                                                                                                                                                              |      |      |       |      |   |    | 2 | PLPEEKKLIP E E E E K                                            | 1 |
|                                                                                                                                                                                                                                                                              |      |      |       |      |   |    | 2 | AKSPGVDPKQLAAELQK                                               | 1 |
|                                                                                                                                                                                                                                                                              |      |      |       |      |   |    | 2 | EEHKSSMM[147]PGFLSEVNALSAVSSVVK                                 | 1 |
|                                                                                                                                                                                                                                                                              |      |      |       |      |   |    | 2 | PPIAPKPVIPQLPTTTQK                                              | 1 |
|                                                                                                                                                                                                                                                                              |      |      |       |      |   |    | 2 | REETDWF DK                                                      | 2 |
| PCLO_HUMAN (Q9Y6V0) Protein piccolo (Aczonin) [MASS=566653]                                                                                                                                                                                                                  | *    | 5.56 | *     | *    | * | 15 | 3 | APFQYTEGYTTKGSQTMTSSGAQKK                                       | 1 |
|                                                                                                                                                                                                                                                                              |      |      |       |      |   |    | 2 | GYDRDIAFIMDDFQHAMS DSEAYHLRR                                    | 1 |
|                                                                                                                                                                                                                                                                              |      |      |       |      |   |    | 2 | RILPPSM[147]YLLQKTK                                             | 1 |
|                                                                                                                                                                                                                                                                              |      |      |       |      |   |    | 2 | QIEMSADEDASGSEDEFIR                                             | 1 |
|                                                                                                                                                                                                                                                                              |      |      |       |      |   |    | 3 | AVLPTKLEKSPK                                                    | 1 |
|                                                                                                                                                                                                                                                                              |      |      |       |      |   |    | 3 | RTLPPPEEISTGTQSTFSTM[147]GTVSR                                  | 1 |
|                                                                                                                                                                                                                                                                              |      |      |       |      |   |    | 3 | HRPHGPLLPTIEDSSEEEELR                                           | 1 |
|                                                                                                                                                                                                                                                                              |      |      |       |      |   |    | 2 | TAPVTTTSAVSKSSPQQQTSPK                                          | 1 |
|                                                                                                                                                                                                                                                                              |      |      |       |      |   |    | 1 | AIPRPASDSK                                                      | 1 |
| PCNT_HUMAN (O95613) Pericentrin (Pericentrin B) (Kendrin) [MASS=378079]                                                                                                                                                                                                      | *    | 1.68 | *     | *    | * | 2  | 3 | EPPTAQDGELAAALHVKEDC[330]ALQLM[147]LAR                          | 1 |
|                                                                                                                                                                                                                                                                              |      |      |       |      |   |    | 3 | DAPLC[330]KQEGVMSVLTVC[330]QRQLQSELLLVK                         | 1 |
| PCOC1_HUMAN (Q15113) Procollagen C-endopeptidase enhancer 1 precursor (Procollagen COOH-terminal proteinase enhancer 1) (Procollagen C-proteinase enhancer 1) (PCPE-1) (Type I procollagen COOH-terminal proteinase enhancer) (Type 1 procollagen C-proteinase) [MASS=47972] | 0.00 | 5.57 | 11.74 | 0.00 | 1 | 1  | 2 | RTGTLQSNFC[339]ASSLVVTATVKSM[147]VR                             | 1 |
| PCSK6_HUMAN (P29122) Proprotein convertase subtilisin/kexin type 6 precursor (EC 3.4.21.-) (Paired basic amino acid cleaving enzyme 4) (Subtilisin/kexin-like protease PACE4) (Subtilisin-like proprotein convertase 4) (SPC4) [MASS=106420]                                 | *    | 7.12 | *     | *    | * | 3  | 2 | NHPDLAPNYDSYASYDVNGNDYDPSPR                                     | 1 |
|                                                                                                                                                                                                                                                                              |      |      |       |      |   |    | 2 | GSC[339]IPDC[339]EPGTYFDSELIR                                   | 1 |
|                                                                                                                                                                                                                                                                              |      |      |       |      |   |    | 3 | C[339]VPAC[330]GEGFYPEEM[147]PGLPHKVC[339]R                     | 1 |
| PCYOX_HUMAN (Q9UHG3) Prenylcysteine oxidase precursor (EC 1.8.3.5) (PCL1) [MASS=56611]                                                                                                                                                                                       | *    | 6.14 | *     | *    | * | 1  | 3 | LYYLNIEC[339]AASAMEM[147]SAIAAHNAALLAYHR                        | 1 |
| PDCD8_HUMAN (O95831) Programmed cell death protein 8, mitochondrial precursor (EC 1.-.-) (Apoptosis-inducing factor) [MASS=66900]                                                                                                                                            | 0.99 | 9.14 | 0.76  | 0.00 | 1 | 3  | 2 | C[339]LIATGGTPR                                                 | 1 |
|                                                                                                                                                                                                                                                                              |      |      |       |      |   |    | 2 | SITIIGGGFLGSELAC[330]ALGR                                       | 1 |
|                                                                                                                                                                                                                                                                              |      |      |       |      |   |    | 3 | ISREVKSITIIGGGFLGSELAC[339]ALGR                                 | 1 |

|                                                                                                                                                                                                                                                                             |      |       |      |      |   |   |   |                                                 |   |
|-----------------------------------------------------------------------------------------------------------------------------------------------------------------------------------------------------------------------------------------------------------------------------|------|-------|------|------|---|---|---|-------------------------------------------------|---|
| PDIA3_HUMAN (P30101) Protein disulfide-isomerase A3 precursor (EC 5.3.4.1) (Disulfide isomerase ER-60) (ERp60) (58 kDa microsomal protein) (p58) (ERp57) (58 kDa glucose-regulated protein) [MASS=56782]                                                                    | 0.63 | 4.75  | 1.59 | 0.00 | 1 | 1 | 3 | FIQENIFGIC[339]PHM[147]TEDNKDLIQGK              | 1 |
|                                                                                                                                                                                                                                                                             |      |       |      |      |   |   | 3 | IKSFENLANADR                                    | 1 |
|                                                                                                                                                                                                                                                                             |      |       |      |      |   |   | 3 | TPGPKDRIVM[147]EVTLNK                           | 1 |
| PDZK3_HUMAN (O15018) PDZ domain-containing protein 3 (PDZ domain-containing protein 2) (Activated in prostate cancer protein) [MASS=301609]                                                                                                                                 | 0.00 | 3.70  | 0.41 | 0.00 | 1 | 7 | 3 | HYC[339]YEQNWPHESTSFSSVKQRIK                    | 1 |
|                                                                                                                                                                                                                                                                             |      |       |      |      |   |   | 3 | QASLPGSPQALRNPLLR                               | 1 |
|                                                                                                                                                                                                                                                                             |      |       |      |      |   |   | 1 | TPGPKDR                                         | 1 |
|                                                                                                                                                                                                                                                                             |      |       |      |      |   |   | 1 | NPLLRQR                                         | 1 |
|                                                                                                                                                                                                                                                                             |      |       |      |      |   |   | 2 | TELEITPRRSPGPPAGGVSC[330]PEK                    | 1 |
| PDZK4_HUMAN (Q76G19) PDZ domain-containing protein 4 (PDZ domain-containing RING finger protein 4-like protein) [MASS=86170]                                                                                                                                                | 0.00 | 7.02  | 0.82 | 0.00 | 1 | 3 | 3 | AMAGNSNLNRTPPGPAVATPAK                          | 1 |
|                                                                                                                                                                                                                                                                             |      |       |      |      |   |   | 3 | M[147]GC[330]NM[147]C[339]VVQK                  | 1 |
|                                                                                                                                                                                                                                                                             |      |       |      |      |   |   | 3 | RHRGQQGEHEHYHSC[339]VQLAPTR                     | 1 |
| PDZK6_HUMAN (Q9ULD6) PDZ domain-containing protein 6 [MASS=105647]                                                                                                                                                                                                          | *    | 2.02  | *    | *    | * | 1 | 2 | STLPNPFHLGNLKKDLPEK                             | 1 |
| PE2R2_HUMAN (P43116) Prostaglandin E2 receptor, EP2 subtype (Prostanoid EP2 receptor) (PGE receptor, EP2 subtype) [MASS=39760]                                                                                                                                              | *    | 2.51  | *    | *    | * | 1 | 3 | LMRSVLC[330]C[339]R                             | 1 |
| PEA15_HUMAN (Q15121) Astrocytic phosphoprotein PEA-15 (Phosphoprotein enriched in diabetes) (PED) [MASS=15040]                                                                                                                                                              | *    | 8.46  | *    | *    | * | 1 | 2 | PDLLTM[147]VVDYR                                | 1 |
| PECI_HUMAN (O75521) Peroxisomal 3,2-trans-enoyl-CoA isomerase (EC 5.3.3.8) (Dodecenoyl-CoA isomerase) (Delta(3),delta(2)-enoyl-CoA isomerase) (D3,D2-enoyl-CoA isomerase) (DBI-related protein 1) (DRS-1) (Hepatocellular carcinoma-associated antigen 88) (NY [MASS=39609] | 0.21 | 9.47  | 0.82 | 0.00 | 1 | 2 | 2 | EKLHAVNAEEC[330]NVLQGR                          | 1 |
|                                                                                                                                                                                                                                                                             |      |       |      |      |   |   | 3 | LYALYKQATEGPC[330]NMPK                          | 1 |
| PEPL1_HUMAN (Q8NDH3) Probable aminopeptidase NPEPL1 (EC 3.4.11.-) (Aminopeptidase-like 1) [MASS=55861]                                                                                                                                                                      | *    | 1.72  | *    | *    | * | 1 | 2 | GKTTM[147]PGMK                                  | 1 |
| PEX19_HUMAN (P40855) Peroxisomal biogenesis factor 19 (Peroxin-19) (Peroxisomal farnesylated protein) (33 kDa housekeeping protein) [MASS=32806]                                                                                                                            | 0.00 | 11.04 | 2.45 | 0.00 | 1 | 1 | 3 | ELAGEM[147]PPGLNFDLALNLSGPPGASGEQC[339]LIM[147] | 1 |

|                                                                                                                                                                                                                                                                    |      |      |      |      |   |   |                       |                                                                                                                                                                       |                       |
|--------------------------------------------------------------------------------------------------------------------------------------------------------------------------------------------------------------------------------------------------------------------|------|------|------|------|---|---|-----------------------|-----------------------------------------------------------------------------------------------------------------------------------------------------------------------|-----------------------|
| PGAM1_HUMAN (P18669) Phosphoglycerate mutase 1 (EC 5.4.2.1) (EC 5.4.2.4) (EC 3.1.3.13) (Phosphoglycerate mutase isozyme B) (PGAM-B) (BPG-dependent PGAM 1) [MASS=28673]                                                                                            | 1.00 | 8.30 | 0.94 | 0.06 | 2 | 1 | 2                     | YADLTEDQLPSC[330]ESLKDTIAR<br>YADLTEDQLPSC[330]ESLKDTIAR                                                                                                              | 1<br>1                |
| PGBM_HUMAN (P98160) Basement membrane-specific heparan sulfate proteoglycan core protein precursor (HSPG) (Perlecan) (PLC) [MASS=468822]                                                                                                                           | 0.00 | 2.39 | 0.88 | 0.00 | 1 | 5 | 3<br>2<br>2<br>3<br>3 | C[330]EHSQALHC[330]HPEAC[330]GPDATC[330]VNR<br>TDEANC[330]PTK<br>EFREVSEAVVDTLESEYLK<br>C[330]KNNVVGRLC[339]NEC[330]ADGSFHLSTR<br>DMSDELNC[339]EEPVLGISPTFSLLVETSLPPR | 1<br>1<br>1<br>1<br>1 |
| PGCB_HUMAN (Q96GW7) Brevican core protein precursor (Brain-enriched hyaluronan-binding protein) (Protein BEHAB) [MASS=99117]                                                                                                                                       | 0.99 | 5.05 | 0.49 | 0.00 | 1 | 2 | 3<br>2                | GGVAVVPASGDC[330]VPSPC[330]HNGGTC[330]LEEEEGVR<br>FC[339]NPGWDAFQGAC[330]YK                                                                                           | 1<br>1                |
| PGK1_HUMAN (P00558) Phosphoglycerate kinase 1 (EC 2.7.2.3) (Primer recognition protein 2) (PRP 2) [MASS=44483]                                                                                                                                                     | 1.00 | 7.69 | 0.65 | 0.27 | 2 | 2 | 2<br>2                | AC[330]ANPAAGSVILLENLR<br>DVLFLKDC[330]VGPEVEK                                                                                                                        | 1<br>1                |
| PHAR3_HUMAN (Q96KR7) Phosphatase and actin regulator 3 (Scapinin) (Scaffold-associated PP1-inhibiting protein) [MASS=62552]                                                                                                                                        | *    | 1.79 | *    | *    | * | 1 | 2                     | QQIEMKLSKR                                                                                                                                                            | 1                     |
| PHLA1_HUMAN (Q8WV24) Pleckstrin homology-like domain family A member 1 (T-cell death-associated gene 51 protein) (Apoptosis-associated nuclear protein) (Proline- and histidine-rich protein) (Proline- and glutamine-rich protein) (PQ-rich protein) [MASS=29524] | *    | 4.63 | *    | *    | * | 1 | 2                     | YMYFTVVM[147]AEGK                                                                                                                                                     | 1                     |
| PHLD1_HUMAN (P80108) Phosphatidylinositol-glycan-specific phospholipase D 1 precursor (EC 3.1.4.50) (PI-G PLD) (Glycoprotein phospholipase D) (Glycosyl-phosphatidylinositol-specific phospholipase D) [MASS=92374]                                                | 0.00 | 4.64 | 2.48 | 0.00 | 1 | 2 | 2<br>2                | VYLIYGNDLGLPPVDLKDKEAHR<br>GSPC[339]GLSTHVEIGHR                                                                                                                       | 1<br>1                |

|                                                                                                                                                                                                                                                                              |      |      |      |      |   |   |             |                                                                           |             |
|------------------------------------------------------------------------------------------------------------------------------------------------------------------------------------------------------------------------------------------------------------------------------|------|------|------|------|---|---|-------------|---------------------------------------------------------------------------|-------------|
| PHLPP_HUMAN (O60346) PH domain leucine-rich repeat-containing protein phosphatase (EC 3.1.3.16) (PH domain leucine-rich repeat protein phosphatase) (Pleckstrin homology domain-containing family E protein 1) (Suprachiasmatic nucleus circadian oscillatory [MASS=184671]) | *    | 2.04 | *    | *    | * | 2 | 3<br>2      | RGAPQPIAGGAAPVPGAGGGANSLRR<br>TLLKHR                                      | 1<br>1      |
| PI3R4_HUMAN (Q99570) Phosphoinositide 3-kinase regulatory subunit 4 (EC 2.7.11.1) (PI3-kinase regulatory subunit 4) (PI3-kinase p150 subunit) (Phosphoinositide 3-kinase adaptor protein) [MASS=152971]                                                                      | *    | 1.25 | *    | *    | * | 1 | 2           | PLLQQGLSDAEFVIVK                                                          | 1           |
| PI52A_HUMAN (P48426) Phosphatidylinositol-4-phosphate 5-kinase type-2 alpha (EC 2.7.1.68) (Phosphatidylinositol-4-phosphate 5-kinase type II alpha) (1-phosphatidylinositol-4-phosphate 5-kinase 2-alpha) (PtdIns(4)P-5-kinase isoform 2-alpha) (PIP5KII-alpha) [MASS=46224] | 0.97 | 9.11 | 0.96 | 0.00 | 1 | 3 | 2<br>3<br>3 | FKEYC[330]PM[147]VFR<br>EVYFMAIIDILTHYDAK<br>ENMPSHFKFK                   | 1<br>1<br>1 |
| PIGT_HUMAN (Q969N2) GPI transamidase component PIG-T precursor (Phosphatidylinositol-glycan biosynthesis, class T protein) [MASS=65699]                                                                                                                                      | *    | 5.36 | *    | *    | * | 1 | 3           | PSYIHYQPAQDRLQPHLLEM[147]LIQLPANSVTK                                      | 1           |
| PIN1_HUMAN (Q13526) Peptidyl-prolyl cis-trans isomerase NIMA-interacting 1 (EC 5.2.1.8) (Rotamase Pin1) (PPIase Pin1) [MASS=18243]                                                                                                                                           | 0.97 | 4.29 | 0.67 | 0.00 | 1 | 1 | 2           | C[330]SHLLVK                                                              | 1           |
| PITM2_HUMAN (Q9BZ72) Membrane-associated phosphatidylinositol transfer protein 2 (Phosphatidylinositol transfer protein, membrane-associated 2) (Pyk2 N-terminal domain-interacting receptor 3) (NIR-3) [MASS=148932]                                                        | *    | 4.37 | *    | *    | * | 2 | 2<br>3      | QRVVAWLAQHNFPHGVVSFC[330]DGLVHDPLRHK<br>PYTDGPGGSGQYTHKVYHVGM[147]HIPSWFR | 1<br>1      |

|                                                                                                                                                                                                                                |      |      |      |      |   |    |   |                                                 |   |
|--------------------------------------------------------------------------------------------------------------------------------------------------------------------------------------------------------------------------------|------|------|------|------|---|----|---|-------------------------------------------------|---|
| PK3CG_HUMAN (P48736) Phosphatidylinositol-4,5-bisphosphate 3-kinase catalytic subunit gamma isoform (EC 2.7.1.153) (PI3-kinase p110 subunit gamma) (PtdIns-3-kinase subunit p110) (PI3K) (PI3Kgamma) (p120-PI3K) [MASS=126453] | *    | 7.62 | *    | *    | * | 4  | 2 | SAAASLSSMELIPIEFVLPTSQRKC[339]K                 | 1 |
|                                                                                                                                                                                                                                |      |      |      |      |   |    | 2 | HYQQRFAVILEAYLR                                 | 1 |
|                                                                                                                                                                                                                                |      |      |      |      |   |    | 3 | GALLNLQIYC[339]GKAPALSSK                        | 1 |
|                                                                                                                                                                                                                                |      |      |      |      |   |    | 2 | HHTNLLIILFSM[147]MLMTGM[147]PQLTSK              | 1 |
| PKDRE_HUMAN (Q9NTG1) Polycystic kidney disease and receptor for egg jelly-related protein precursor (PKD and REJ homolog) [MASS=255447]                                                                                        | *    | 2.44 | *    | *    | * | 3  | 2 | MHPEEMQRIHDQIVR                                 | 1 |
|                                                                                                                                                                                                                                |      |      |      |      |   |    | 3 | TTSM[147]RTPNFM[147]YVK                         | 1 |
|                                                                                                                                                                                                                                |      |      |      |      |   |    | 3 | GAPVRLSMQAEATINASVQLDC[330]PAAR                 | 1 |
| PKHA5_HUMAN (Q9HAU0) Pleckstrin homology domain-containing family A member 5 (Phosphoinositol 3-phosphate-binding protein 2) (PEPP-2) [MASS=127463]                                                                            | *    | 8.87 | *    | *    | * | 6  | 2 | TNSMQQLEQWIK                                    | 1 |
|                                                                                                                                                                                                                                |      |      |      |      |   |    | 2 | TNSM[147]QQLEQWIK                               | 1 |
|                                                                                                                                                                                                                                |      |      |      |      |   |    | 3 | IQDVMEGLSKHKQQR                                 | 1 |
|                                                                                                                                                                                                                                |      |      |      |      |   |    | 2 | TYYFC[330]TDTGKEM[147]ELWM[147]K                | 1 |
|                                                                                                                                                                                                                                |      |      |      |      |   |    | 1 | PFSTVKYK                                        | 1 |
|                                                                                                                                                                                                                                |      |      |      |      |   |    | 2 | VDKITSENAPTKETNNIPNHR                           | 1 |
|                                                                                                                                                                                                                                |      |      |      |      |   |    | 3 | KTENISYEMLFEPEPNGVNSVEM[147]MDK                 | 1 |
| PKHD1_HUMAN (Q8TCZ9) Polycystic kidney and hepatic disease 1 precursor (Fibrocystin) (Polyductin) (Tigmin) [MASS=446699]                                                                                                       | *    | 0.93 | *    | *    | * | 2  | 2 | LAAEVGLLTR                                      | 1 |
|                                                                                                                                                                                                                                |      |      |      |      |   |    | 2 | TPKLELLGGAM[147]YYLEAEHHGIAPSRGMR               | 1 |
| PKP1_HUMAN (Q13835) Plakophilin-1 (Band-6 protein) (B6P) [MASS=82860]                                                                                                                                                          | 0.00 | 4.28 | 1.95 | 0.00 | 1 | 1  | 3 | DATLEAC[339]AGALQNLTASKGLM[147]SSGM[147]SQLIGLK | 1 |
| PLCB2_HUMAN (Q00722) 1-phosphatidylinositol-4,5-bisphosphate phosphodiesterase beta 2 (EC 3.1.4.11) (Phosphoinositide phospholipase C) (Phospholipase C-beta-2) (PLC-beta-2) [MASS=133679]                                     | *    | 5.84 | *    | *    | * | 3  | 2 | SLPREESAGAAPGEGPEGVDGRVR                        | 1 |
|                                                                                                                                                                                                                                |      |      |      |      |   |    | 3 | AC[330]EC[330]PPELC[330]EQDPLIAKADAQESR         | 1 |
|                                                                                                                                                                                                                                |      |      |      |      |   |    | 2 | PPDEEPIITHGFTM[147]TTDIFFK                      | 1 |
| PLEC1_HUMAN (Q15149) Plectin-1 (PLTN) (PCN) (Hemidesmosomal protein 1) (HD1) [MASS=531733]                                                                                                                                     | *    | 2.97 | *    | *    | * | 10 | 2 | ELEEVSPEPVPVATTQRTLAR                           | 1 |
|                                                                                                                                                                                                                                |      |      |      |      |   |    | 3 | LVAIRTEYNLRLK                                   | 1 |
|                                                                                                                                                                                                                                |      |      |      |      |   |    | 3 | M[147]VAGM[147]LM[147]PRDQLR                    | 1 |
|                                                                                                                                                                                                                                |      |      |      |      |   |    | 2 | EKEAENER                                        | 1 |
|                                                                                                                                                                                                                                |      |      |      |      |   |    | 2 | QEIQAM[147]PLADSQAVREQLR                        | 1 |
|                                                                                                                                                                                                                                |      |      |      |      |   |    | 2 | NDDIADGNPK                                      | 1 |
|                                                                                                                                                                                                                                |      |      |      |      |   |    | 2 | LKAGVAAPATQVAQVTLQSVQR                          | 1 |
|                                                                                                                                                                                                                                |      |      |      |      |   |    | 3 | WLC[330]QAEVERAR                                | 1 |
|                                                                                                                                                                                                                                |      |      |      |      |   |    | 2 | M[147]KQVAEEAAR                                 | 1 |
|                                                                                                                                                                                                                                |      |      |      |      |   |    | 2 | ALAEAAKRQR                                      | 1 |



|                                                                                                                                                                                                   |      |      |      |      |   |   |   |   |                                                                                                                     |                                                                                                                    |                  |
|---------------------------------------------------------------------------------------------------------------------------------------------------------------------------------------------------|------|------|------|------|---|---|---|---|---------------------------------------------------------------------------------------------------------------------|--------------------------------------------------------------------------------------------------------------------|------------------|
| PLMN_HUMAN (P00747) Plasminogen precursor (EC 3.4.21.7) [Contains: Plasmin heavy chain A; Activation peptide; Angiostatin; Plasmin heavy chain A, short form; Plasmin light chain B] [MASS=90569] | *    | 4.20 | *    | *    | * | 2 | 2 | 2 | AFQYHSKEQQC[330]VIM[147]AENR<br>TPENYPNAGLTMNYC[339]R                                                               | 1<br>1                                                                                                             |                  |
| PLOD3_HUMAN (O60568) Procollagen-lysine,2-oxoglutarate 5-dioxygenase 3 precursor (EC 1.14.11.4) (Lysyl hydroxylase 3) (LH3) [MASS=84785]                                                          | *    | 6.64 | *    | *    | * | 2 | 2 | 3 | TLGLGEEWRGGDVARTVGGGQK<br>GDTLRM[147]ELPQRDVFSGSDTDPDM[147]AFC[339]K                                                | 1<br>1                                                                                                             |                  |
| PLSB_HUMAN (Q9HCL2) Glycerol-3-phosphate acyltransferase, mitochondrial precursor (EC 2.3.1.15) (GPAT) [MASS=93794]                                                                               | *    | 5.92 | *    | *    | * | 3 | 2 | 3 | 2                                                                                                                   | DTSINESRNATDESLR<br>ILQEM[147]VATVSPAMIRLTGWVLLK<br>RRLDETPDGR                                                     | 1<br>1<br>1      |
| PLXA1_HUMAN (Q9UIW2) Plexin-A1 precursor (Semaphorin receptor NOV) [MASS=211086]                                                                                                                  | *    | 0.74 | *    | *    | * | 1 | 3 |   | IRKILVDLSNPGGR                                                                                                      | 3                                                                                                                  |                  |
| PLXA4_HUMAN (Q9HCM2) Plexin-A4 precursor [MASS=212454]                                                                                                                                            | *    | 2.43 | *    | *    | * | 2 | 3 | 3 | DRGNVASLIM[147]TVLQSKLEYATDVLK<br>PC[330]TVTSDVQLLC[330]ESPNLIGR<br>DPAEC[339]PQAQLTDNANQLLLVSSR<br>VPDGATVGLVPQLHR | 1<br>1<br>1<br>1                                                                                                   |                  |
| PLXB3_HUMAN (Q9ULL4) Plexin-B3 precursor [MASS=206846]                                                                                                                                            | 0.00 | 6.08 | 1.26 | 0.00 | 1 | 5 | 3 | 2 | 3                                                                                                                   | AFADVQYAVSVASRPC[339]NPEPSLYRTSAR<br>VSDNVDAILAVIAQTFIDSC[330]TTSEHK<br>LLSMKGTQKFVDDTFQAILS VNR                   | 1<br>1<br>1      |
| PLXD1_HUMAN (Q9Y4D7) Plexin-D1 precursor [MASS=212094]                                                                                                                                            | *    | 4.31 | *    | *    | * | 4 | 1 | 3 | 1                                                                                                                   | SLDTRGDLAK<br>AEDVDLEWFASSTQSYILRDLDDTSVVEDGRK<br>TDTSIAC[330]TMPEGALPAPVPVC[339]VRFER<br>C[339]EASPNTSPQDC[330]PR | 1<br>1<br>1<br>1 |
| PMS2_HUMAN (P54278) PMS1 protein homolog 2 (DNA mismatch repair protein PMS2) [MASS=95797]                                                                                                        | 0.00 | 6.84 | 0.51 | 0.00 | 1 | 4 | 1 | 3 | 2                                                                                                                   | HHTSK<br>RGMLSSSTSGAISDK<br>SVHQIC[330]SGQVVLSLSTAVK<br>TMFAEM[147]EIIGQFNLGFIITK                                  | 1<br>1<br>1<br>1 |
| POPD1_HUMAN (Q8NE79) Blood vessel epicardial substance (hBVES) (Popeye domain-containing protein 1) (Popeye protein 1) [MASS=41451]                                                               | 0.00 | 3.61 | 0.78 | 0.00 | 1 | 1 | 2 |   | RLTGQFC[330]M[147]IQTLK                                                                                             | 1                                                                                                                  |                  |
| PP1A_HUMAN (P62136) Serine/threonine-protein phosphatase PP1-alpha catalytic subunit (EC 3.1.3.16) (PP-1A) [MASS=37512]                                                                           | 0.69 | 3.03 | 0.58 | 0.00 | 1 | 1 | 2 |   | GNHEC[330]ASINR                                                                                                     | 1                                                                                                                  |                  |

|                                                                                                                                                                                                                |      |       |      |      |   |   |   |                                                       |   |
|----------------------------------------------------------------------------------------------------------------------------------------------------------------------------------------------------------------|------|-------|------|------|---|---|---|-------------------------------------------------------|---|
| PP2BA_HUMAN (Q08209) Serine/threonine-protein phosphatase 2B catalytic subunit alpha isoform (EC 3.1.3.16) (Calmodulin-dependent calcineurin A subunit alpha isoform) (CAM-PRP catalytic subunit) [MASS=58687] | *    | 2.30  | *    | *    | * | 1 | 2 | PRVDILKAHLMK                                          | 1 |
| PPARB_HUMAN (Q03181) Peroxisome proliferator-activated receptor delta (PPAR-delta) (PPAR-beta) (Nuclear hormone receptor 1) (NUC1) (NUCI) [MASS=49903]                                                         | *    | 10.88 | *    | *    | * | 2 | 2 | KTETETSLHPLLQEIYKDMY                                  | 1 |
|                                                                                                                                                                                                                |      |       |      |      |   |   | 3 | SSSPPSLLDQLQM[147]GC[339]DGASC[339]GSLNM[147]EC[339]R | 1 |
| PPB1_HUMAN (P05187) Alkaline phosphatase, placental type precursor (EC 3.1.3.1) (PLAP-1) (Regan isozyme) [MASS=57953]                                                                                          | *    | 3.36  | *    | *    | * | 1 | 3 | FNQC[339]NTTRGNEVISVMNR                               | 1 |
| PPCKC_HUMAN (P35558) Phosphoenolpyruvate carboxykinase, cytosolic [GTP] (EC 4.1.1.32) (Phosphoenolpyruvate carboxylase) (PEPCK-C) [MASS=69194]                                                                 | *    | 3.54  | *    | *    | * | 1 | 3 | EGKFLWPGFGENSRLVLEWMFNR                               | 1 |
| PPCT_HUMAN (Q9UKL6) Phosphatidylcholine transfer protein (PC-TP) (StAR-related lipid transfer protein 2) (StARD2) (START domain-containing protein 2) [MASS=24843]                                             | *    | 4.67  | *    | *    | * | 1 | 2 | QSLAIESDGK                                            | 1 |
|                                                                                                                                                                                                                |      |       |      |      |   |   | 3 | HTGPGILSM[147]ANAGPNTNGSQFFIC[330]TAK                 | 1 |
| PPIA_HUMAN (P62937) Peptidyl-prolyl cis-trans isomerase A (EC 5.2.1.8) (PPIase A) (Rotamase A) (Cyclophilin A) (Cyclosporin A-binding protein) [MASS=17881]                                                    | 1.00 | 31.71 | 0.96 | 0.16 | 7 | 3 | 2 | IIPGFM[147]C[339]QGGDFTR                              | 1 |
|                                                                                                                                                                                                                |      |       |      |      |   |   | 2 | IIPGFM[147]C[330]QGGDFTR                              | 1 |
|                                                                                                                                                                                                                |      |       |      |      |   |   | 2 | KITIADC[339]GQLE                                      | 1 |
|                                                                                                                                                                                                                |      |       |      |      |   |   | 2 | IIPGFMC[330]QGGDFTR                                   | 1 |
|                                                                                                                                                                                                                |      |       |      |      |   |   | 2 | KITIADC[330]GQLE                                      | 1 |
|                                                                                                                                                                                                                |      |       |      |      |   |   | 2 | IIPGFMC[339]QGGDFTR                                   | 1 |
| PPIB_HUMAN (P23284) Peptidyl-prolyl cis-trans isomerase B precursor (EC 5.2.1.8) (PPIase) (Rotamase) (Cyclophilin B) (S-cyclophilin) (SCYLP) (CYP-S1) [MASS=22742]                                             | 0.31 | 6.73  | 1.00 | 0.00 | 1 | 1 | 2 | DKPLKDVIIADC[339]GK                                   | 1 |
| PPID_HUMAN (Q08752) 40 kDa peptidyl-prolyl cis-trans isomerase (EC 5.2.1.8) (PPIase) (Rotamase) (Cyclophilin-40) (CYP-40) (Cyclophilin-related protein) [MASS=40632]                                           | *    | 5.15  | *    | *    | * | 1 | 3 | AQGWQGLKEYDQALADLKK                                   | 1 |

|                                                                                                                                                                                                                                                                    |      |       |      |      |   |   |                                                                                                                 |                            |   |
|--------------------------------------------------------------------------------------------------------------------------------------------------------------------------------------------------------------------------------------------------------------------|------|-------|------|------|---|---|-----------------------------------------------------------------------------------------------------------------|----------------------------|---|
| PRC1_HUMAN (O43663) Protein regulator of cytokinesis 1 [MASS=71664]                                                                                                                                                                                                | *    | 3.39  | *    | *    | * | 1 | 3                                                                                                               | AFMVNGQKFMEYVAEQWEM[147]HR | 1 |
| PRD15_HUMAN (P57071) PR domain zinc finger protein 15 (PR domain-containing protein 15) (Zinc finger protein 298) [MASS=169203]                                                                                                                                    | 0.00 | 4.78  | 0.74 | 0.00 | 1 | 3 | 3 FSDC[330]EFPYEFC[330]TVC[330]FSPFK<br>3 ENLPDPNVQKYIHPC[330]EIC[339]GRIFNSIGNLER<br>2 GYEDRDRADPQQLPEAVPAGLVR | 1<br>1<br>1                |   |
| PRDM1_HUMAN (O75626) PR domain zinc finger protein 1 (PR domain-containing protein 1) (Beta-interferon gene positive-regulatory domain I-binding factor) (BLIMP-1) (Positive regulatory domain I-binding factor 1) (PRDI-binding factor 1) (PRDI-BF1) [MASS=87991] | *    | 0.63  | *    | *    | * | 1 | 1 EYSVK                                                                                                         | 1                          |   |
| PRDX3_HUMAN (P30048) Thioredoxin-dependent peroxide reductase, mitochondrial precursor (EC 1.11.1.15) (Peroxiredoxin-3) (PRX III) (Antioxidant protein 1) (AOP-1) (Protein MER5 homolog) (HBC189) [MASS=27692]                                                     | 0.99 | 12.11 | 1.08 | 0.00 | 1 | 1 | 3 AFQYVETHGEVC[330]PANWTPDSPTIKPSAASK                                                                           | 1                          |   |
| PRI1_HUMAN (P49642) DNA primase small subunit (EC 2.7.7.-) (DNA primase 49 kDa subunit) (p49) [MASS=49902]                                                                                                                                                         | *    | 10.00 | *    | *    | * | 2 | 3 DDIYIRYQSFNNQSDLEKEMQK<br>3 C[339]C[330]SSADIC[339]PKC[339]WTLMTM[147]AIR                                     | 1<br>1                     |   |
| PRI2_HUMAN (P49643) DNA primase large subunit (EC 2.7.7.-) (DNA primase 58 kDa subunit) (p58) [MASS=58806]                                                                                                                                                         | *    | 6.88  | *    | *    | * | 2 | 2 ISLDQIDLLSTKSFPPC[330]M[147]R<br>3 GRKVYLEDFAYVPLK                                                            | 1<br>1                     |   |
| PROD_HUMAN (O43272) Proline oxidase, mitochondrial precursor (EC 1.5.3.-) (Proline dehydrogenase) [MASS=59216]                                                                                                                                                     | 0.82 | 3.29  | 0.99 | 0.00 | 1 | 1 | 2 FNVEKPLIFNTYQC[339]YLK                                                                                        | 1                          |   |
| PRP31_HUMAN (Q8WWY3) U4/U6 small nuclear ribonucleoprotein Prp31 (Pre-mRNA-processing factor 31) (U4/U6 snRNP 61 kDa protein) (hPrp31) (Protein 61K) (Serologically defined breast cancer antigen NY-BR-99) [MASS=55456]                                           | 0.00 | 3.01  | 0.67 | 0.00 | 1 | 1 | 2 LEEAC[330]DMALELNASK                                                                                          | 1                          |   |
| PRP4B_HUMAN (Q13523) Serine/threonine-protein kinase PRP4 homolog (EC 2.7.11.1) (PRP4 pre-mRNA-processing factor 4 homolog) (PRP4 kinase) [MASS=116972]                                                                                                            | 0.00 | 2.18  | 2.21 | 0.00 | 1 | 1 | 3 SYDYGIDM[147]WSVGC[339]TLYELYTGK                                                                              | 1                          |   |

|                                                                                                                                                                                                                                                                                |      |      |      |      |   |   |   |                                         |   |
|--------------------------------------------------------------------------------------------------------------------------------------------------------------------------------------------------------------------------------------------------------------------------------|------|------|------|------|---|---|---|-----------------------------------------|---|
| PRS23_HUMAN (O95084) Serine protease 23 precursor (EC 3.4.21.-) (Putative secreted protein ZSIG13) [MASS=43001]                                                                                                                                                                | *    | 6.79 | *    | *    | * | 1 | 2 | LSTGC[330]TGTLVAEKHVLTAHC[330]IHDGK     | 1 |
| PSD12_HUMAN (O00232) 26S proteasome non-ATPase regulatory subunit 12 (26S proteasome regulatory subunit p55) [MASS=52773]                                                                                                                                                      | 0.00 | 7.91 | 0.85 | 0.00 | 1 | 2 | 2 | YYNLM[147]IQLDQHEGSYLSIC[339]K          | 1 |
|                                                                                                                                                                                                                                                                                |      |      |      |      |   |   | 3 | EWDLLNENIMLLSKRR                        | 1 |
| PTC1_HUMAN (Q13635) Protein patched homolog 1 (PTC1) (PTC) [MASS=160560]                                                                                                                                                                                                       | *    | 0.90 | *    | *    | * | 1 | 3 | IPFEDRTGEC[339]LKR                      | 1 |
| PTN14_HUMAN (Q15678) Tyrosine-protein phosphatase non-receptor type 14 (EC 3.1.3.48) (Protein-tyrosine phosphatase pez) [MASS=135238]                                                                                                                                          | *    | 3.96 | *    | *    | * | 3 | 2 | QDQASLPPAM[147]AR                       | 1 |
|                                                                                                                                                                                                                                                                                |      |      |      |      |   |   | 3 | MAGLEAQKRPLMLAALNGLSVAR                 | 1 |
|                                                                                                                                                                                                                                                                                |      |      |      |      |   |   | 2 | RQPTWSRSSLPR                            | 1 |
| PTN6_HUMAN (P29350) Tyrosine-protein phosphatase non-receptor type 6 (EC 3.1.3.48) (Protein-tyrosine phosphatase 1C) (PTP-1C) (Hematopoietic cell protein-tyrosine phosphatase) (SH-PTP1) (Protein-tyrosine phosphatase SHP-1) [MASS=67561]                                    | *    | 3.36 | *    | *    | * | 1 | 2 | TIQM[147]VRAQRSGM[147]VQTEAQYK          | 1 |
| PTN_HUMAN (P21246) Pleiotrophin precursor (PTN) (Heparin-binding growth-associated molecule) (HB-GAM) (Heparin-binding growth factor 8) (HBGF-8) (Osteoblast-specific factor 1) (OSF-1) (Heparin-binding neurite outgrowth-promoting factor 1) (HBNF-1) (Heparin) [MASS=18942] | 0.97 | 5.95 | 0.85 | 0.00 | 1 | 1 | 2 | TVTISKPC[339]GK                         | 1 |
| PTPR2_HUMAN (Q92932) Receptor-type tyrosine-protein phosphatase N2 precursor (EC 3.1.3.48) (R-PTP-N2) (Islet cell autoantigen-related protein) (ICAAR) (IAR) (Phogrin) [MASS=111281]                                                                                           | *    | 4.43 | *    | *    | * | 2 | 3 | LGC[339]LLEEGLC[330]GASEAC[339]VNDGVFGR | 1 |
|                                                                                                                                                                                                                                                                                |      |      |      |      |   |   | 2 | LSGLGGDPGADATAAYQELC[339]R              | 1 |
| PTPRK_HUMAN (Q15262) Receptor-type tyrosine-protein phosphatase kappa precursor (EC 3.1.3.48) (Protein-tyrosine phosphatase kappa) (R-PTP-kappa) [MASS=162087]                                                                                                                 | *    | 1.53 | *    | *    | * | 1 | 3 | VTC[330]VEMEPLAEYVVRTFTLERR             | 1 |

|                                                                                                                                                                                                                |      |      |      |      |   |   |   |                                        |   |
|----------------------------------------------------------------------------------------------------------------------------------------------------------------------------------------------------------------|------|------|------|------|---|---|---|----------------------------------------|---|
| PTPRM_HUMAN (P28827) Receptor-type tyrosine-protein phosphatase mu precursor (EC 3.1.3.48) (Protein-tyrosine phosphatase mu) (R-PTP-mu) [MASS=163632]                                                          | *    | 1.45 | *    | *    | * | 1 | 2 | M[147]VWHENTASIIM[147]VTNLVEVGR        | 1 |
| PTPRT_HUMAN (O14522) Receptor-type tyrosine-protein phosphatase T precursor (EC 3.1.3.48) (R-PTP-T) (RPTP-rho) [MASS=164371]                                                                                   | 0.00 | 1.71 | 1.50 | 0.00 | 1 | 1 | 3 | C[339]LPFLISVDGESSNYINAALMDSHK         | 1 |
| PTPRZ_HUMAN (P23471) Receptor-type tyrosine-protein phosphatase zeta precursor (EC 3.1.3.48) (R-PTP-zeta) [MASS=254528]                                                                                        | 0.71 | 1.77 | 0.41 | 0.00 | 1 | 2 | 3 | SESSHQVVPSLYSNDELFTANLEINQAHPK         | 1 |
|                                                                                                                                                                                                                |      |      |      |      |   |   | 2 | KYPTC[330]NSPK                         | 1 |
| PUR4_HUMAN (O15067) Phosphoribosylformylglycinamide synthase (EC 6.3.5.3) (FGAM synthase) (FGAMS) (Formylglycinamide ribotide amidotransferase) (FGARAT) (Formylglycinamide ribotide synthetase) [MASS=144663] | *    | 4.48 | *    | *    | * | 3 | 3 | RIVLVDREC[330]PVR                      | 2 |
|                                                                                                                                                                                                                |      |      |      |      |   |   | 2 | RNGQGDPPTPPPTVDLELEWVLGKMPR            | 1 |
|                                                                                                                                                                                                                |      |      |      |      |   |   | 2 | PIM[147]FSGGIGSMEADHISK                | 1 |
| PURA_HUMAN (Q00577) Transcriptional activator protein Pur-alpha (Purine-rich single-stranded DNA-binding protein alpha) [MASS=34911]                                                                           | 1.00 | 2.17 | 1.63 | 0.00 | 2 | 1 | 2 | FGHTFC[339]JK                          | 1 |
|                                                                                                                                                                                                                |      |      |      |      |   |   | 2 | FGHTFC[330]JK                          | 1 |
| PYGB_HUMAN (P11216) Glycogen phosphorylase, brain form (EC 2.4.1.1) [MASS=96564]                                                                                                                               | *    | 2.02 | *    | *    | * | 1 | 2 | EPDC[330]FKDIVNMLM[147]HHDR            | 1 |
| PYGM_HUMAN (P11217) Glycogen phosphorylase, muscle form (EC 2.4.1.1) (Myophosphorylase) [MASS=96960]                                                                                                           | *    | 3.69 | *    | *    | * | 1 | 3 | QVIEQLSSGFFSPKQPDLFKDIVNM[147]LMHHDR   | 1 |
| PZRN4_HUMAN (Q6ZMN7) PDZ domain-containing RING finger protein 4 (Ligand of Numb-protein X 4) (SEMACAP3-like protein) [MASS=117072]                                                                            | *    | 6.47 | *    | *    | * | 4 | 2 | SGMTTDDDTM[147]SEMK                    | 1 |
|                                                                                                                                                                                                                |      |      |      |      |   |   | 3 | GGC[339]ASGLGGGEVPPAR                  | 1 |
|                                                                                                                                                                                                                |      |      |      |      |   |   | 2 | ESQKC[339]SEPKMEWK                     | 1 |
|                                                                                                                                                                                                                |      |      |      |      |   |   | 3 | ILQINGEDVQNREEAVALLSNDDEC[330]JK       | 1 |
| RA611_HUMAN (Q6IQ26) Rab6-interacting protein 1 (Rab6IP1) [MASS=147094]                                                                                                                                        | 0.00 | 4.66 | 0.61 | 0.00 | 1 | 2 | 3 | QIC[330]SAM[147]QTLYHMHNAEYDVLHAPPADDR | 1 |
|                                                                                                                                                                                                                |      |      |      |      |   |   | 3 | DHTLVNSLIRVLQTLQEFNITLETSLVKGIDI       | 1 |
| RABE2_HUMAN (Q9H5N1) Rab GTPase-binding effector protein 2 (Rabaptin-5beta) [MASS=63542]                                                                                                                       | 0.85 | 7.73 | 2.36 | 0.00 | 1 | 3 | 3 | SIM[147]DEAPLTDVRDIK                   | 1 |
|                                                                                                                                                                                                                |      |      |      |      |   |   | 2 | QQQQQDC[339]EEK                        | 1 |
|                                                                                                                                                                                                                |      |      |      |      |   |   | 2 | RPRHAPSLHGSTELLPLSR                    | 1 |

|                                                                                                                                                                                   |      |      |      |      |   |   |   |                                            |   |
|-----------------------------------------------------------------------------------------------------------------------------------------------------------------------------------|------|------|------|------|---|---|---|--------------------------------------------|---|
| RAC1_HUMAN (P63000) Ras-related C3 botulinum toxin substrate 1 precursor (p21-Rac1) (Ras-like protein TC25) [MASS=21450]                                                          | 1.00 | 7.29 | 0.67 | 0.17 | 3 | 1 | 2 | HHC[330]PNTPIILVGTK                        | 1 |
|                                                                                                                                                                                   |      |      |      |      |   |   | 2 | HHC[339]PNTPIILVGTK                        | 1 |
| RAD9B_HUMAN (Q6WBX8) Cell cycle checkpoint control protein RAD9B homolog (RAD9 homolog B) (hRAD9B) [MASS=46392]                                                                   | 0.00 | 4.59 | 0.53 | 0.00 | 1 | 1 | 3 | ETLTNISALENC[339]GSPAM[147]KR              | 1 |
| RAG1_HUMAN (P15918) V(D)J recombination-activating protein 1 (RAG-1) (RING finger protein 74) [MASS=119115]                                                                       | *    | 1.05 | *    | *    | * | 1 | 2 | RYPVHGPVDGK                                | 2 |
| RAI14_HUMAN (Q9P0K7) Ankyrin repeat and coiled-coil structure-containing protein (Retinoic acid-induced protein 14) (Novel retinal pigment epithelial cell protein) [MASS=110041] | 0.42 | 6.43 | 1.31 | 0.00 | 1 | 3 | 2 | EMEEKISNLKEHLASK                           | 1 |
|                                                                                                                                                                                   |      |      |      |      |   |   | 3 | TALMLAC[330]EIGSSNAVEALIK                  | 1 |
|                                                                                                                                                                                   |      |      |      |      |   |   | 3 | M[147]HLLYAVQGQM[147]DEDVQKVLKQILTMC[330]K | 1 |
| RAI1_HUMAN (Q7Z5J4) Retinoic acid-induced protein 1 [MASS=203351]                                                                                                                 | *    | 5.77 | *    | *    | * | 6 | 3 | RRQQQVLPLDPAEPEIR                          | 1 |
|                                                                                                                                                                                   |      |      |      |      |   |   | 3 | PSPKAASSPSNPAALPVASDSSPMGSKTK              | 1 |
|                                                                                                                                                                                   |      |      |      |      |   |   | 2 | DLGDLIC[330]GPYYPEHC[330]LPKK              | 1 |
|                                                                                                                                                                                   |      |      |      |      |   |   | 3 | KLLDNSHLPATFKVSSSPQK                       | 1 |
|                                                                                                                                                                                   |      |      |      |      |   |   | 2 | MQSFRERC[339]GFH GK                        | 1 |
|                                                                                                                                                                                   |      |      |      |      |   |   | 3 | QQNYQQT SQETSR                             | 1 |
| RAP1A_HUMAN (P62834) Ras-related protein Rap-1A precursor (GTP-binding protein smg-p21A) (Ras-related protein Krev-1) (C21KG) (G-22K) [MASS=20987]                                | 0.83 | 5.98 | 0.54 | 0.00 | 1 | 1 | 2 | C[330]DLEDERVVGK                           | 1 |
| RAPSN_HUMAN (Q13702) 43 kDa receptor-associated protein of the synapse (RAPsyn) (Acetylcholine receptor-associated 43 kDa protein) (43 kDa postsynaptic protein) [MASS=46197]     | 0.00 | 3.16 | 0.46 | 0.00 | 1 | 1 | 2 | LGSAM[147]EC[330]C[330]EESMK               | 1 |
| RASF4_HUMAN (Q9H2L5) Ras association domain-containing protein 4 [MASS=36748]                                                                                                     | 0.00 | 9.97 | 0.17 | 0.00 | 1 | 1 | 3 | ILHGPC[330]EKIARIFLMEADLGVEVPHEVAQYIK      | 1 |
| RBBP8_HUMAN (Q99708) Retinoblastoma-binding protein 8 (RBBP-8) (CtBP-interacting protein) (CtIP) (Retinoblastoma-interacting protein and myosin-like) (RIM) [MASS=101967]         | *    | 1.23 | *    | *    | * | 1 | 3 | HLEPLKSLGGR                                | 1 |

|                                                                                                                                                                                                                                 |      |       |      |      |   |   |   |                                        |   |
|---------------------------------------------------------------------------------------------------------------------------------------------------------------------------------------------------------------------------------|------|-------|------|------|---|---|---|----------------------------------------|---|
| RBL2_HUMAN (Q08999) Retinoblastoma-like protein 2 (130 kDa retinoblastoma-associated protein) (PRB2) (P130) (RBR-2) [MASS=128356]                                                                                               | *    | 5.18  | *    | *    | * | 4 | 2 | LHTM[147]LTGLR                         | 1 |
|                                                                                                                                                                                                                                 |      |       |      |      |   |   | 2 | GDLIQFYNNIYIK                          | 1 |
|                                                                                                                                                                                                                                 |      |       |      |      |   |   | 2 | RGILLEDGSESPAK                         | 1 |
|                                                                                                                                                                                                                                 |      |       |      |      |   |   | 3 | TFAMKYSQANMDAPPLSPYFVR                 | 1 |
| RBM4B_HUMAN (Q9BQ04) RNA-binding protein 4B (RNA-binding motif protein 4B) (RNA-binding protein 30) (RNA-binding motif protein 30) [MASS=40149]                                                                                 | *    | 5.01  | *    | *    | * | 1 | 2 | VLEC[339]DIIKNYGFVHIEDK                | 1 |
| RBP17_HUMAN (Q9H2T7) Ran-binding protein 17 [MASS=124375]                                                                                                                                                                       | *    | 3.95  | *    | *    | * | 2 | 2 | LVSRSVPLPVEQR                          | 1 |
|                                                                                                                                                                                                                                 |      |       |      |      |   |   | 3 | SALC[330]GNYVSFGVFKLYGDNHFDNLQAFVK     | 1 |
| RB1A_HUMAN (Q15414) RNA-binding motif protein, Y chromosome, family 1 member A1 (RNA-binding motif protein 1) [MASS=55783]                                                                                                      | *    | 4.23  | *    | *    | * | 1 | 3 | DRYGRSWESYSSC[330]GDFHYC[330]DR        | 1 |
| RCBT2_HUMAN (O95199) RCC1 and BTB domain-containing protein 2 (Regulator of chromosome condensation and BTB domain-containing protein 2) (Chromosome condensation 1-like) (CHC1-L) (RCC1-like G exchanging factor) [MASS=60315] | *    | 2.18  | *    | *    | * | 1 | 2 | FLVDGKYIYAHK                           | 1 |
| RCC2_HUMAN (Q9P258) Protein RCC2 (Telophase disk protein of 60 kDa) (RCC1-like protein TD-60) [MASS=56084]                                                                                                                      | 0.00 | 1.53  | 0.40 | 0.00 | 1 | 1 | 2 | YGC[330]LAGVR                          | 1 |
| RECQ1_HUMAN (P46063) ATP-dependent DNA helicase Q1 (EC 3.6.1.-) (DNA-dependent ATPase Q1) [MASS=73456]                                                                                                                          | *    | 7.24  | *    | *    | * | 2 | 3 | WVHAEM[147]VNKNSELKLIYVTPEK            | 1 |
|                                                                                                                                                                                                                                 |      |       |      |      |   |   | 3 | IKQC[330]LEDSDAGASNEYDSSPAAWNK         | 1 |
| RECQ5_HUMAN (O94762) ATP-dependent DNA helicase Q5 (EC 3.6.1.-) (RecQ protein-like 5) (RecQ5) [MASS=108858]                                                                                                                     | *    | 6.56  | *    | *    | * | 4 | 3 | SM[147]AGYYQESGRAGR                    | 1 |
|                                                                                                                                                                                                                                 |      |       |      |      |   |   | 2 | VFGFDSFKTPLQESATM[147]AVVK             | 1 |
|                                                                                                                                                                                                                                 |      |       |      |      |   |   | 3 | ANVRFVAHWNIKSMAGYYQESGR                | 1 |
|                                                                                                                                                                                                                                 |      |       |      |      |   |   | 1 | AGRDGK                                 | 1 |
| RED2_HUMAN (Q9NS39) Double-stranded RNA-specific editase B2 (EC 3.5.-.-) (dsRNA adenosine deaminase B2) (RNA-dependent adenosine deaminase 3) (RNA-editing deaminase 2) (RNA-editing enzyme 2) [MASS=80621]                     | 0.00 | 10.15 | *    | *    | * | 3 | 3 | GQAAQAALQELFDIQMPGHAPGR                | 1 |
|                                                                                                                                                                                                                                 |      |       |      |      |   |   | 3 | PGDAALLSAAYGRRR                        | 1 |
|                                                                                                                                                                                                                                 |      |       |      |      |   |   | 3 | PGLQYRTVSQTGVPVHAPVFAVAVEVNGLTFEGTGPTK | 1 |
| RENT2_HUMAN (Q9HAU5) Regulator of nonsense transcripts 2 (Nonsense mRNA reducing factor 2) (Up-frameshift suppressor 2 homolog) (hUpf2) [MASS=147809]                                                                           | *    | 1.26  | *    | *    | * | 1 | 3 | AAMDFC[339]M[147]NMNTKANRK             | 1 |

|                                                                                                                                                                                 |      |       |      |      |   |   |        |                                                                   |        |
|---------------------------------------------------------------------------------------------------------------------------------------------------------------------------------|------|-------|------|------|---|---|--------|-------------------------------------------------------------------|--------|
| RF1M_HUMAN (O75570) Peptide chain release factor 1, mitochondrial precursor (MRF-1) [MASS=52305]                                                                                | *    | 3.60  | *    | *    | * | 1 | 3      | LVHIPTGLVVEC[330]QQER                                             | 1      |
| RHOA_HUMAN (P61586) Transforming protein RhoA precursor (H12) [MASS=21768]                                                                                                      | 0.99 | 7.25  | 0.74 | 0.00 | 1 | 1 | 2      | HFC[330]PNVPIILVGNK                                               | 1      |
| RHOB_HUMAN (P62745) Rho-related GTP-binding protein RhoB precursor (H6) [MASS=22123]                                                                                            | 0.96 | 16.33 | 0.71 | 0.00 | 1 | 2 | 3<br>2 | HFC[330]PNVPIILVANKKDLR<br>HFC[330]PNVPIILVANK                    | 1<br>1 |
| RHOG_HUMAN (P84095) Rho-related GTP-binding protein RhoG precursor [MASS=21308]                                                                                                 | 0.00 | 5.24  | *    | *    | * | 1 | 2      | DLRAQPDLR                                                         | 1      |
| RIMS3_HUMAN (Q9UJD0) Regulating synaptic membrane exocytosis protein 3 (Nim3) (Rab-3-interacting molecule 3) (RIM 3) (RIM3 gamma) [MASS=32796]                                  | 0.00 | 7.79  | 1.42 | 0.00 | 1 | 1 | 2      | C[339]FM[147]GM[147]AQIM[147]LDELDSLAAVTGWYK                      | 1      |
| RINI_HUMAN (P13489) Ribonuclease inhibitor (Ribonuclease/angiogenin inhibitor 1) (RAI) (Placental ribonuclease inhibitor) (RNase inhibitor) (RI) [MASS=49842]                   | 0.00 | 8.91  | 0.23 | 0.00 | 1 | 2 | 3<br>2 | LDDC[339]GLTEARC[339]KDISSALR<br>SNELGDVGVHC[330]VLQGLQTPSC[330]K | 1<br>1 |
| RIPK4_HUMAN (P57078) Receptor-interacting serine/threonine-protein kinase 4 (EC 2.7.11.1) (Ankyrin repeat domain protein 3) (PKC-delta-interacting protein kinase) [MASS=91610] | *    | 4.93  | *    | *    | * | 2 | 3<br>2 | MEGDGGTPWALALLRTFDAGEFTGWEK<br>GSTPLHM[147]AVERRVR                | 1<br>1 |
| RKHD1_HUMAN (Q86XN8) RING finger and KH domain-containing protein 1 [MASS=49802]                                                                                                | *    | 5.57  | *    | *    | * | 1 | 3      | KSVNMTEC[330]VPVPSSEHVAEIVGRQGC[339]K                             | 2      |
| RL18A_HUMAN (Q02543) 60S ribosomal protein L18a [MASS=20762]                                                                                                                    | 0.00 | 4.55  | 0.86 | 0.00 | 1 | 1 | 2      | C[339]HTPPLYR                                                     | 1      |
| RL30_HUMAN (P62888) 60S ribosomal protein L30 [MASS=12653]                                                                                                                      | 0.98 | 37.72 | 1.16 | 0.00 | 1 | 2 | 2<br>3 | TGVHHYSGNNIELGTAC[339]GK<br>LVILANNC[339]PALRKSEIEYAM[147]LAK     | 1<br>1 |
| RL3_HUMAN (P39023) 60S ribosomal protein L3 (HIV-1 TAR RNA-binding protein B) (TARBP-B) [MASS=45977]                                                                            | 0.64 | 2.99  | 1.28 | 0.00 | 1 | 1 | 2      | TVFAEHISDEC[339]K                                                 | 1      |
| RL4_HUMAN (P36578) 60S ribosomal protein L4 (L1) [MASS=47566]                                                                                                                   | 0.95 | 6.10  | 1.41 | 0.00 | 1 | 2 | 3<br>2 | NTILRQARNHK<br>RGPC[339]IYNEDNGIHK                                | 1<br>1 |
| RL7_HUMAN (P18124) 60S ribosomal protein L7 [MASS=29226]                                                                                                                        | *    | 6.85  | *    | *    | * | 1 | 3      | AGNFYVPAEPKLAFFVIR                                                | 1      |



|                                                                                                                                                    |      |      |      |      |   |   |                  |                                                                                                                                                          |                  |
|----------------------------------------------------------------------------------------------------------------------------------------------------|------|------|------|------|---|---|------------------|----------------------------------------------------------------------------------------------------------------------------------------------------------|------------------|
| RLA0_HUMAN (P05388) 60S acidic ribosomal protein P0 (L10E) [MASS=34273]                                                                            | *    | 3.47 | *    | *    | * | 1 | 2                | GHLENNPALEK                                                                                                                                              | 1                |
| RN5A_HUMAN (Q05823) 2-5A-dependent ribonuclease (EC 3.1.26.-) (2-5A-dependent RNase) (Ribonuclease L) (RNase L) (Ribonuclease 4) [MASS=83532]      | *    | 2.70 | *    | *    | * | 2 | 1<br>2           | PM[147]IGKLK<br>SIKWAGDPQEVKR                                                                                                                            | 1<br>1           |
| RNF17_HUMAN (Q9BXT8) RING finger protein 17 [MASS=73736]                                                                                           | *    | 5.67 | *    | *    | * | 2 | 2<br>3           | YSQIKDAKVLEK<br>PPPKNISSDM[147]PVSLRDALVFM[147]ELAK                                                                                                      | 1<br>1           |
| ROBO3_HUMAN (Q96MS0) Roundabout homolog 3 precursor (Roundabout-like protein 3) [MASS=148208]                                                      | *    | 3.32 | *    | *    | * | 2 | 3<br>2           | LMMSHTLKS DAGMYVC[330]VASN MAGER<br>IVEQPPDLLVSRGEPATLPC[330]R                                                                                           | 1<br>1           |
| RP1_HUMAN (P56715) Oxygen-regulated protein 1 (Retinitis pigmentosa RP1 protein) (Retinitis pigmentosa 1 protein) [MASS=240660]                    | *    | 1.48 | *    | *    | * | 2 | 3<br>3           | EYNIGFVKRAIEK<br>RVTQSFEAFLQHLTEVM[147]QR                                                                                                                | 1<br>1           |
| RPC1_HUMAN (O14802) DNA-directed RNA polymerase III largest subunit (EC 2.7.7.6) (RPC155) (RPC1) [MASS=155748]                                     | *    | 6.47 | *    | *    | * | 4 | 2<br>2<br>2<br>3 | ETDVAKKTSHIC[330]FGM[147]K<br>AVIGILQMIC[330]KTC[330]C[330]HIM[147]LSQEEK<br>RHVMLLSDLMTYKGEVLGITR<br>QYC[339]GKGEDLC[330]ANDSYVTIQNSELM[147]SGSM[147]DK | 1<br>1<br>1<br>1 |
| RPC2_HUMAN (Q9NW08) DNA-directed RNA polymerase III subunit 127.6 kDa polypeptide (EC 2.7.7.6) (RNA polymerase III subunit 2) (RPC2) [MASS=127784] | *    | 4.41 | *    | *    | * | 2 | 2<br>3           | HM[147]RQDQITNGMVNAISTGNWSLKR<br>LIELLAGKAGVLDGRFHYGTAFGGSK                                                                                              | 1<br>1           |
| RPC5_HUMAN (Q9NVU0) DNA-directed RNA polymerases III 80 kDa polypeptide (EC 2.7.7.6) (RNA polymerase III subunit 5) (RPC5) [MASS=79898]            | *    | 6.36 | *    | *    | * | 2 | 2<br>3           | SPSEYLM[147]MLM[147]PPSQEEEEKDK<br>SDILYPKDSSSPHSGVPAEVL C[339]RGR                                                                                       | 1<br>1           |
| RRAGA_HUMAN (Q7L523) Ras-related GTP-binding protein A (Rag A) (RagA) (Adenovirus E3 14.7 kDa-interacting protein 1) (FIP-1) [MASS=36566]          | 0.00 | 3.51 | 1.68 | 0.00 | 1 | 1 | 2                | LSRPLEC[339]AC[339]FR                                                                                                                                    | 1                |
| RS15A_HUMAN (P62244) 40S ribosomal protein S15a [MASS=14708]                                                                                       | 0.00 | 6.98 | 0.91 | 0.00 | 1 | 1 | 2                | QVLIRPC[339]SK                                                                                                                                           | 1                |
| RS16_HUMAN (P62249) 40S ribosomal protein S16 [MASS=16314]                                                                                         | 0.99 | 6.21 | 1.07 | 0.00 | 1 | 1 | 2                | TATAVAHC[339]K                                                                                                                                           | 1                |

|                                                                                                                                                                                                      |      |       |      |      |   |    |   |                                           |   |
|------------------------------------------------------------------------------------------------------------------------------------------------------------------------------------------------------|------|-------|------|------|---|----|---|-------------------------------------------|---|
| RSF1_HUMAN (Q96T23) Remodeling and spacing factor 1 (Rsf-1) (Hepatitis B virus X-associated protein) (HBV pX-associated protein 8) (p325 subunit of RSF chromatin remodelling complex) [MASS=163004] | *    | 4.26  | *    | *    | * | 3  | 2 | GYLEMSVEC[339]KLALLK                      | 1 |
|                                                                                                                                                                                                      |      |       |      |      |   |    | 3 | EDSEFTKVEMDNLDNAQTSGIEEPSETK              | 1 |
|                                                                                                                                                                                                      |      |       |      |      |   |    | 2 | DSESDFSDDFSDDFVETR                        | 1 |
| RSPO4_HUMAN (Q2I0M5) R-spondin-4 precursor (Roof plate-specific spondin-4) (hRspo4) [MASS=26171]                                                                                                     | *    | 16.67 | *    | *    | * | 2  | 2 | M[147]RAPLC[339]LLLLVAHAVDMLALNRR         | 1 |
|                                                                                                                                                                                                      |      |       |      |      |   |    | 3 | C[339]GATC[330]ESC[339]FSQDFC[339]IR      | 1 |
| RTN1_HUMAN (Q16799) Reticulon-1 (Neuroendocrine-specific protein) [MASS=83617]                                                                                                                       | 0.99 | 6.83  | 0.92 | 0.00 | 1 | 3  | 2 | QSPVAMETASTGVAGVSSAM[147]DHTFSTTSK        | 1 |
|                                                                                                                                                                                                      |      |       |      |      |   |    | 2 | YTDC[330]LQFYVNSTLK                       | 1 |
|                                                                                                                                                                                                      |      |       |      |      |   |    | 2 | QKAIDLLYWR                                | 1 |
| RUSC2_HUMAN (Q8N2Y8) RUN and SH3 domain-containing protein 2 [MASS=161194]                                                                                                                           | 0.00 | 4.29  | 1.61 | 0.00 | 1 | 3  | 2 | RNPIFEFPGSLSAASHLNC[339]R                 | 1 |
|                                                                                                                                                                                                      |      |       |      |      |   |    | 3 | YLC[339]PAVRAVLEDGLKAFVLDVIIGQR           | 1 |
|                                                                                                                                                                                                      |      |       |      |      |   |    | 2 | VSQDLLLSAHSTLQLARAR                       | 1 |
|                                                                                                                                                                                                      |      |       |      |      |   |    | 3 | EKLAENIHELWALTR                           | 1 |
|                                                                                                                                                                                                      |      |       |      |      |   |    | 2 | AKKVAMMTQPPATPTLPR                        | 1 |
|                                                                                                                                                                                                      |      |       |      |      |   |    | 2 | ELLDLQKDM[147]VVM[147]LLSLEGNVNGM[147]IAR | 1 |
|                                                                                                                                                                                                      |      |       |      |      |   |    | 3 | PSMLQHLLRRLVFDVPILNEFAK                   | 1 |
| RYSR1_HUMAN (P21817) Ryanodine receptor 1 (Skeletal muscle-type ryanodine receptor) (RyR1) (RyR-1) (Skeletal muscle calcium release channel) [MASS=565172]                                           | 0.00 | 4.64  | 0.62 | 0.00 | 1 | 12 | 2 | KQELEAKGGGTHPLLVPYDTLTAK                  | 1 |
|                                                                                                                                                                                                      |      |       |      |      |   |    | 2 | MPLKLLTNHYER                              | 1 |
|                                                                                                                                                                                                      |      |       |      |      |   |    | 3 | WPIKESLKAMIAWEWTIEK                       | 1 |
|                                                                                                                                                                                                      |      |       |      |      |   |    | 3 | C[330]WKYYC[330]LPTGWANFGVTSEELHLTR       | 1 |
|                                                                                                                                                                                                      |      |       |      |      |   |    | 3 | DVIEDC[339]LMSLC[330]RYIRPSMLQHLLR        | 1 |
|                                                                                                                                                                                                      |      |       |      |      |   |    | 2 | EEDADDPEKIVR                              | 1 |
|                                                                                                                                                                                                      |      |       |      |      |   |    | 2 | GLSYRSLRR                                 | 1 |
|                                                                                                                                                                                                      |      |       |      |      |   |    | 3 | KM[147]LPIGLNMC[330]APTDQDLITLAKTR        | 1 |
| RYSR2_HUMAN (Q92736) Ryanodine receptor 2 (Cardiac muscle-type ryanodine receptor) (RyR2) (RyR-2) (Cardiac muscle ryanodine receptor-calcium release channel) (hRyR-2) [MASS=564495]                 | *    | 2.42  | *    | *    | * | 5  | 2 | LHDRGAAEMVLQTIASASKGETGPM[147]VAATLK      | 1 |
|                                                                                                                                                                                                      |      |       |      |      |   |    | 2 | LGIAILNGGNSTVQQKM[147]LDYLKEK             | 1 |
|                                                                                                                                                                                                      |      |       |      |      |   |    | 2 | NHRLYFLSAASR                              | 1 |
|                                                                                                                                                                                                      |      |       |      |      |   |    | 3 | TLLGYGYNLEAPDQDHAARAEVC[339]SGTGERFR      | 1 |
|                                                                                                                                                                                                      |      |       |      |      |   |    | 2 | AM[147]FDHLSYLLENSVGLASPAM[147]JR         | 1 |
| RYSR3_HUMAN (Q15413) Ryanodine receptor 3 (Brain-type ryanodine receptor) (RyR3) (RyR-3) (Brain ryanodine receptor-calcium release channel) [MASS=551928]                                            | *    | 2.36  | *    | *    | * | 6  | 3 | VTKILGDMPDPTQFGIHDDTM[147]EAER            | 1 |
|                                                                                                                                                                                                      |      |       |      |      |   |    | 2 | TSRLGPLK                                  | 1 |
|                                                                                                                                                                                                      |      |       |      |      |   |    | 2 | MGKEEELLMINGLDIM[147]NNK                  | 1 |
|                                                                                                                                                                                                      |      |       |      |      |   |    | 3 | SILGM[147]PDTVEDMC[330]PDIPQLEGLM[147]K   | 1 |
|                                                                                                                                                                                                      |      |       |      |      |   |    | 2 | LDVQTIQPVLSWR                             | 1 |
|                                                                                                                                                                                                      |      |       |      |      |   |    | 3 | PALGEC[330]LASLAAAIPVAFLEPTLNR            | 1 |

|                                                                                                                                                                         |      |      |      |      |   |   |   |                                |   |
|-------------------------------------------------------------------------------------------------------------------------------------------------------------------------|------|------|------|------|---|---|---|--------------------------------|---|
| S12A2_HUMAN (P55011) Solute carrier family 12 member 2 (Bumetanide-sensitive sodium-(potassium)-chloride cotransporter 1) (Basolateral Na-K-Cl symporter) [MASS=131446] | 0.00 | 2.48 | 1.76 | 0.00 | 1 | 2 | 3 | M[147]KAFYAPVHADDLR            | 1 |
|                                                                                                                                                                         |      |      |      |      |   |   | 2 | NVGLMIC[339]GHVHM[147]GPRR     | 1 |
| S12A3_HUMAN (P55017) Solute carrier family 12 member 3 (Thiazide-sensitive sodium-chloride cotransporter) (Na-Cl symporter) [MASS=113138]                               | *    | 5.78 | *    | *    | * | 3 | 3 | IIGVSVTVLLAISLAGMEWESK         | 1 |
|                                                                                                                                                                         |      |      |      |      |   |   | 2 | QVRLNEIVLDYSRDAALIVITLPIGR     | 1 |
|                                                                                                                                                                         |      |      |      |      |   |   | 3 | RFEDMIAPFR                     | 1 |
| S12A4_HUMAN (Q9UP95) Solute carrier family 12 member 4 (Electroneutral potassium-chloride cotransporter 1) (Erythroid K-Cl cotransporter 1) (hKCC1) [MASS=120649]       | *    | 3.04 | *    | *    | * | 2 | 3 | GIDYYDRNLALFEEELDIRPK          | 1 |
|                                                                                                                                                                         |      |      |      |      |   |   | 3 | TLM[147]M[147]EQRSQM[147]LR    | 1 |
| S12A6_HUMAN (Q9UHW9) Solute carrier family 12 member 6 (Electroneutral potassium-chloride cotransporter 3) (K-Cl cotransporter 3) [MASS=127616]                         | *    | 2.96 | *    | *    | * | 2 | 3 | KC[339]SIRIFTVAQLEDNSIQM[147]K | 1 |
|                                                                                                                                                                         |      |      |      |      |   |   | 2 | VKGFC[330]QLVVAAKLR            | 1 |
| S14L1_HUMAN (Q92503) SEC14-like protein 1 [MASS=81277]                                                                                                                  | 0.00 | 6.15 | 0.57 | 0.00 | 1 | 2 | 2 | VFGRPISSWTC[339]LVDLEGLNMR     | 1 |
|                                                                                                                                                                         |      |      |      |      |   |   | 3 | RKFLIYAGNDYQGPGLLDYIDK         | 1 |
| S27A1_HUMAN (Q6PCB7) Long-chain fatty acid transport protein 1 (EC 6.2.1.-) (Fatty acid transport protein 1) (FATP-1) (Solute carrier family 27 member 1) [MASS=71108]  | 0.00 | 3.56 | 1.68 | 0.00 | 1 | 1 | 2 | FC[330]SGDLGPEGILPDTHLLDPLLK   | 1 |
| S27A4_HUMAN (Q6P1M0) Long-chain fatty acid transport protein 4 (EC 6.2.1.-) (Fatty acid transport protein 4) (FATP-4) (Solute carrier family 27 member 4) [MASS=72064]  | *    | 5.29 | *    | *    | * | 2 | 1 | EGFDPAIVK                      | 1 |
|                                                                                                                                                                         |      |      |      |      |   |   | 3 | YLLNQPPREAENQHQRVMAALGNGLR     | 1 |
| S3TC2_HUMAN (Q8TF17) SH3 domain and tetratricopeptide repeats-containing protein 2 [MASS=144776]                                                                        | *    | 1.40 | *    | *    | * | 1 | 2 | M[147]AEAGSELEGVSLVTGQR        | 1 |
| SAMD4_HUMAN (Q9UPU9) Sterile alpha motif domain-containing protein 4 [MASS=58610]                                                                                       | *    | 3.97 | *    | *    | * | 1 | 2 | NVPSARLGLLGTSGFVSSNQR          | 1 |

|                                                                                                                                                                                                                                                                             |      |      |      |      |   |   |   |                                              |   |
|-----------------------------------------------------------------------------------------------------------------------------------------------------------------------------------------------------------------------------------------------------------------------------|------|------|------|------|---|---|---|----------------------------------------------|---|
| SAP_HUMAN (P07602) Proactivator polypeptide precursor [Contains: Saposin A (Protein A); Saposin B-Val; Saposin B (Sphingolipid activator protein 1) (SAP-1) (Cerebroside sulfate activator) (CSAct) (Dispersin) (Sulfatide/GM1 activator); Saposin C (Co-beta- [MASS=58112] | 1.00 | 9.54 | 2.44 | 0.03 | 9 | 3 | 1 | DGGFC[339]EVC[339]KK                         | 1 |
|                                                                                                                                                                                                                                                                             |      |      |      |      |   |   | 1 | GC[339]SFLPDPYQK                             | 4 |
|                                                                                                                                                                                                                                                                             |      |      |      |      |   |   | 3 | QC[339]DQFVAEYEPVLIEILVEVM[147]DPSFVC[339]LK | 1 |
|                                                                                                                                                                                                                                                                             |      |      |      |      |   |   | 2 | GC[339]SFLPDPYQK                             | 2 |
|                                                                                                                                                                                                                                                                             |      |      |      |      |   |   | 2 | GC[330]SFLPDPYQK                             | 2 |
| SATB2_HUMAN (Q9UPW6) DNA-binding protein SATB2 (Special AT-rich sequence-binding protein 2) [MASS=82555]                                                                                                                                                                    | 0.00 | 4.09 | 1.35 | 0.00 | 1 | 1 | 3 | VERENLSDYC[330]VLGQRPM[147]HLPNMNQLASLGK     | 1 |
| SATT_HUMAN (P43007) Neutral amino acid transporter A (SATT) (Alanine/serine/cysteine/threonine transporter) (ASCT1) [MASS=55723]                                                                                                                                            | 1.00 | 2.07 | 0.40 | 0.39 | 5 | 1 | 3 | C[330]IEENNGVDKR                             | 1 |
|                                                                                                                                                                                                                                                                             |      |      |      |      |   |   | 2 | C[339]IEENNGVDKR                             | 1 |
|                                                                                                                                                                                                                                                                             |      |      |      |      |   |   | 2 | C[330]IEENNGVDKR                             | 3 |
| SC10A_HUMAN (Q9Y5Y9) Sodium channel protein type 10 subunit alpha (Sodium channel protein type X subunit alpha) (Voltage-gated sodium channel subunit alpha Nav1.8) (Peripheral nerve sodium channel 3) (hPN3) [MASS=220564]                                                | 0.00 | 3.37 | 0.19 | 0.00 | 1 | 3 | 2 | GTSDPLLC[330]GNGSDSGHC[330]PDGYIC[330]LK     | 1 |
|                                                                                                                                                                                                                                                                             |      |      |      |      |   |   | 2 | AENHIAANTARGSSGGLQAPR                        | 1 |
|                                                                                                                                                                                                                                                                             |      |      |      |      |   |   | 2 | VSEGSTEDNKSPRSDPYNQR                         | 1 |
| SC11A_HUMAN (Q9UI33) Sodium channel protein type 11 subunit alpha (Sodium channel protein type XI subunit alpha) (Voltage-gated sodium channel subunit alpha Nav1.9) (Sensory neuron sodium channel 2) (Peripheral nerve sodium channel 5) (hNaN) [MASS=204947]             | *    | 2.96 | *    | *    | * | 2 | 3 | LHC[339]MDILFAFTARVLGGSDGLDSMK               | 1 |
|                                                                                                                                                                                                                                                                             |      |      |      |      |   |   | 3 | YQFLVMDLPMVSEDRLHC[339]M[147]DILFAFTAR       | 1 |
|                                                                                                                                                                                                                                                                             |      |      |      |      |   |   |   |                                              |   |

|                                                                                                                                                                                                              |      |       |      |      |    |   |   |                                                   |                                   |   |
|--------------------------------------------------------------------------------------------------------------------------------------------------------------------------------------------------------------|------|-------|------|------|----|---|---|---------------------------------------------------|-----------------------------------|---|
|                                                                                                                                                                                                              |      |       |      |      |    |   |   | 3                                                 | DIPDGATVLVGGFGLC[339]GIPENLIDALLK | 1 |
|                                                                                                                                                                                                              |      |       |      |      |    |   |   | 2                                                 | STGC[339]DFAVSPK                  | 1 |
|                                                                                                                                                                                                              |      |       |      |      |    |   |   | 3                                                 | DIPDGATVLVGGFGLC[330]GIPENLIDALLK | 3 |
| SCOT_HUMAN (P55809) Succinyl-CoA:3-ketoacid-coenzyme A transferase 1, mitochondrial precursor (EC 2.8.3.5) (Somatic-type succinyl CoA:3-oxoacid CoA-transferase) (Scot-S) [MASS=56157]                       | 1.00 | 9.04  | 1.09 | 0.05 | 11 | 3 | 2 | DIPDGATVLVGGFGLC[330]GIPENLIDALLK                 | 2                                 |   |
|                                                                                                                                                                                                              |      |       |      |      |    |   | 2 | STGC[330]DFAVSPK                                  | 1                                 |   |
|                                                                                                                                                                                                              |      |       |      |      |    |   | 2 | DIPDGATVLVGGFGLC[339]GIPENLIDALLK                 | 1                                 |   |
|                                                                                                                                                                                                              |      |       |      |      |    |   | 2 | NFNLPM[147]C[330]K                                | 1                                 |   |
|                                                                                                                                                                                                              |      |       |      |      |    |   | 2 | NFNLPM[147]C[339]K                                | 1                                 |   |
| SCRB1_HUMAN (Q8WTV0) Scavenger receptor class B member 1 (SRB1) (SR-BI) (CD36 antigen-like 1) (CD36 and LIMP2II analogous 1) (CLA-1) (Collagen type I receptor, thrombospondin receptor-like 1) [MASS=60878] | 0.00 | 16.49 | 0.28 | 0.00 | 1  | 3 | 3 | WAAGALGVAGLLC[330]AVLGAVMIVMVPSLIK                | 1                                 |   |
|                                                                                                                                                                                                              |      |       |      |      |    |   | 3 | TVGEIM[147]WGYKDPLVNLINKYFPGM[147]FPFK            | 1                                 |   |
|                                                                                                                                                                                                              |      |       |      |      |    |   | 3 | WAAGALGVAGLLC[330]AVLGAVM[147]IVM[147]VPSLIKQQVLK | 1                                 |   |
| SCRN1_HUMAN (Q12765) Secernin-1 [MASS=46382]                                                                                                                                                                 | 0.99 | 3.86  | 0.62 | 0.00 | 1  | 1 | 2 | SSPC[330]IHYFTGTPDPSR                             | 1                                 |   |
| SEHL2_HUMAN (Q9NQF3) Serine hydrolase-like protein 2 (EC 3.1.-.-) [MASS=22471]                                                                                                                               | *    | 12.81 | *    | *    | *  | 1 | 2 | FSILGHSFGGVVGGM[147]FFC[339]TFPEM[147]VDK         | 1                                 |   |
| SELO_HUMAN (Q9BVL4) Selenoprotein O [MASS=73442]                                                                                                                                                             | *    | 3.14  | *    | *    | *  | 1 | 2 | NYIAQNAIEAAERGDFSEVRR                             | 1                                 |   |
| SEM4C_HUMAN (Q9C0C4) Semaphorin-4C precursor [MASS=92622]                                                                                                                                                    | 0.00 | 2.40  | 0.55 | 0.00 | 1  | 1 | 2 | C[330]TYVNM[147]LTFTLEHGEFEDGK                    | 1                                 |   |
| SEM4F_HUMAN (O95754) Semaphorin-4F precursor (Semaphorin W) (Sema W) (Semaphorin M) (Sema M) [MASS=83511]                                                                                                    | 0.00 | 5.19  | 3.23 | 0.00 | 1  | 2 | 2 | WTTFLKADLLC[339]PGPEHGR                           | 1                                 |   |
|                                                                                                                                                                                                              |      |       |      |      |    |   | 2 | GLVQDIESADVSSLIC[339]PKEPGER                      | 1                                 |   |
| SEM5B_HUMAN (Q9P283) Semaphorin-5B precursor [MASS=119866]                                                                                                                                                   | 0.00 | 1.19  | 1.08 | 0.00 | 1  | 1 | 2 | C[339]SSNC[339]GGGM[147]QSRR                      | 1                                 |   |
| SEPR_HUMAN (Q12884) Seprase (EC 3.4.21.-) (Fibroblast activation protein alpha) (Integral membrane serine protease) (170 kDa melanoma membrane-bound gelatinase) [MASS=87793]                                | *    | 3.03  | *    | *    | *  | 1 | 3 | VQNVSVLSIC[339]DFREDWQTWDC[330]PK                 | 1                                 |   |
| SEPT5_HUMAN (Q99719) Septin-5 (Peanut-like protein 1) (Cell division control-related protein 1) (CDCrel-1) [MASS=42777]                                                                                      | 1.00 | 5.96  | 0.60 | 0.16 | 3  | 2 | 2 | DVTC[330]DVHYENYR                                 | 1                                 |   |
|                                                                                                                                                                                                              |      |       |      |      |    |   | 2 | AHC[330]IQQM[147]TSK                              | 1                                 |   |
|                                                                                                                                                                                                              |      |       |      |      |    |   | 2 | AHC[330]IQQMTSK                                   | 1                                 |   |

|                                                                                                                                                                                               |      |       |      |      |   |   |   |                                         |   |
|-----------------------------------------------------------------------------------------------------------------------------------------------------------------------------------------------|------|-------|------|------|---|---|---|-----------------------------------------|---|
| SEPT7_HUMAN (Q16181) Septin-7 (CDC10 protein homolog) [MASS=50680]                                                                                                                            | 1.00 | 8.01  | 0.67 | 0.03 | 4 | 2 | 2 | THMQDLKDVTNNVHYENYRSR                   | 1 |
|                                                                                                                                                                                               |      |       |      |      |   |   | 2 | ADTLTPEEC[330]QQFKK                     | 2 |
|                                                                                                                                                                                               |      |       |      |      |   |   | 2 | ADTLTPEEC[339]QQFKK                     | 2 |
| SERA_HUMAN (O43175) D-3-phosphoglycerate dehydrogenase (EC 1.1.1.95) (3-PGDH) [MASS=56519]                                                                                                    | *    | 7.14  | *    | *    | * | 2 | 2 | FM[147]GTELANGK                         | 1 |
|                                                                                                                                                                                               |      |       |      |      |   |   | 3 | KGILVMNTPNGNSLSAAELTC[339]GMIMC[330]LAR | 1 |
| SETBP_HUMAN (Q9Y6X0) SET-binding protein (SEB) [MASS=169631]                                                                                                                                  | 0.00 | 7.72  | 0.07 | 0.00 | 1 | 5 | 3 | SSYDSSMSPGMPSPHLKVDQTAVHSKNEGSVPTMMTR   | 1 |
|                                                                                                                                                                                               |      |       |      |      |   |   | 3 | ALASGITMSSEVVNR                         | 1 |
|                                                                                                                                                                                               |      |       |      |      |   |   | 2 | MIENESPSVGLTGGNAEKVIPGGVSK              | 1 |
|                                                                                                                                                                                               |      |       |      |      |   |   | 3 | M[147]IENESPSVGLTGGNAEKVIPGGVSKPR       | 1 |
|                                                                                                                                                                                               |      |       |      |      |   |   | 2 | REIEAIQC[330]EVR                        | 1 |
| SETX_HUMAN (Q7Z333) Probable helicase senataxin (EC 3.6.1.-) (SEN1 homolog) [MASS=302951]                                                                                                     | *    | 1.38  | *    | *    | * | 2 | 3 | LSLLAQASVITFPSDSPQNSSLQQR               | 1 |
|                                                                                                                                                                                               |      |       |      |      |   |   | 3 | AQKTMIQKDLDK                            | 1 |
| SF01_HUMAN (Q15637) Splicing factor 1 (Zinc finger protein 162) (Transcription factor ZFM1) (Zinc finger gene in MEN1 locus) (Mammalian branch point-binding protein mBBP) (BBP) [MASS=68198] | 0.00 | 1.88  | 1.68 | 0.00 | 1 | 1 | 2 | C[339]GGAGHIASDC[339]K                  | 1 |
| SFR14_HUMAN (Q8IX01) Putative splicing factor, arginine/serine-rich 14 (Arginine/serine-rich-splicing factor 14) [MASS=120236]                                                                | *    | 7.58  | *    | *    | * | 4 | 2 | SVTPLLMAC[330]NAYELSVK                  | 1 |
|                                                                                                                                                                                               |      |       |      |      |   |   | 2 | LLKSVTPLLMAC[339]NAYELSVK               | 1 |
|                                                                                                                                                                                               |      |       |      |      |   |   | 3 | VDNEFLNMLLDKGAVK                        | 1 |
|                                                                                                                                                                                               |      |       |      |      |   |   | 3 | ALNIVDQEGSLLGKGETQGLLTAKGGVVK           | 1 |
| SFXN1_HUMAN (Q9H9B4) Sideroflexin-1 (Tricarboxylate carrier protein) (TCC) [MASS=35488]                                                                                                       | 0.00 | 5.92  | *    | *    | * | 1 | 2 | FVPFAAVAAANC[339]INIPLMR                | 1 |
| SFXN3_HUMAN (Q9BWM7) Sideroflexin-3 [MASS=35503]                                                                                                                                              | 0.74 | 22.12 | 0.90 | 0.13 | 2 | 3 | 2 | IC[339]MAIPAMAIPLIM[147]DTLEK           | 1 |
|                                                                                                                                                                                               |      |       |      |      |   |   | 3 | QGIFQVVISRIC[339]M[147]AIPAMAIPLIMDTLEK | 1 |
|                                                                                                                                                                                               |      |       |      |      |   |   | 2 | MSAQVPMNM[147]TITGC[330]M[147]LTFYRK    | 1 |
| SGOL2_HUMAN (Q562F6) Shugoshin-like 2 (Tripin) [MASS=144738]                                                                                                                                  | *    | 1.26  | *    | *    | * | 1 | 2 | TSLMSEMNAQSIGRR                         | 1 |
| SGTB_HUMAN (Q96EQ0) Small glutamine-rich tetratricopeptide repeat-containing protein B (Small glutamine-rich protein with tetratricopeptide repeats 2) [MASS=33429]                           | 0.88 | 4.28  | 0.97 | 0.00 | 1 | 1 | 2 | LGHYTDAIKDC[330]EK                      | 1 |
| SHOC2_HUMAN (Q9UQ13) Leucine-rich repeat protein SHOC-2 (Ras-binding protein Sur-8) [MASS=64888]                                                                                              | 0.00 | 12.89 | 0.66 | 0.00 | 1 | 3 | 2 | DNQLTSLPLDFGTWTSMVELNLATNQLTK           | 1 |
|                                                                                                                                                                                               |      |       |      |      |   |   | 2 | LDLSTTLYLRFNRITVVK                      | 1 |
|                                                                                                                                                                                               |      |       |      |      |   |   | 3 | QLPAEIGELC[330]NLITLDVAHNQLEHLPK        | 1 |

|                                                                                                                                                                                                                                                                              |      |       |      |      |    |   |   |                                 |   |
|------------------------------------------------------------------------------------------------------------------------------------------------------------------------------------------------------------------------------------------------------------------------------|------|-------|------|------|----|---|---|---------------------------------|---|
|                                                                                                                                                                                                                                                                              |      |       |      |      |    |   | 2 | ATPQHTVSFTC[330]ESHGFSPR        | 3 |
| SHPS1_HUMAN (P78324) Tyrosine-protein phosphatase non-receptor type substrate 1 precursor (SHP substrate 1) (SHPS-1) (Inhibitory receptor SHPS-1) (Signal-regulatory protein alpha-1) (Sirp-alpha-1) (Sirp-alpha-2) (Sirp-alpha-3) (MyD-1 antigen) (Brain Ig-I [MASS=54812]) | 1.00 | 14.12 | 0.34 | 0.39 | 13 | 4 | 3 | ATPQHTVSFTC[330]ESHGFSPR        | 2 |
|                                                                                                                                                                                                                                                                              |      |       |      |      |    |   | 2 | EGHFPRVTTVSESTK                 | 1 |
|                                                                                                                                                                                                                                                                              |      |       |      |      |    |   | 3 | EDVHSQVIC[330]EVAHVTLQGDPRLR    | 1 |
|                                                                                                                                                                                                                                                                              |      |       |      |      |    |   | 3 | ATPQHTVSFTC[339]ESHGFSPR        | 1 |
|                                                                                                                                                                                                                                                                              |      |       |      |      |    |   | 2 | ATPQHTVSFTC[339]ESHGFSPR        | 1 |
|                                                                                                                                                                                                                                                                              |      |       |      |      |    |   | 3 | LTC[339]QVEHDGQPAVSK            | 1 |
|                                                                                                                                                                                                                                                                              |      |       |      |      |    |   | 2 | LTC[339]QVEHDGQPAVSK            | 1 |
|                                                                                                                                                                                                                                                                              |      |       |      |      |    |   | 3 | LTC[330]QVEHDGQPAVSK            | 1 |
|                                                                                                                                                                                                                                                                              |      |       |      |      |    |   | 2 | EDVHSQVIC[330]EVAHVTLQGDPRLR    | 1 |
|                                                                                                                                                                                                                                                                              |      |       |      |      |    |   | 2 | LTC[330]QVEHDGQPAVSK            | 1 |
| SI1L1_HUMAN (O43166) Signal-induced proliferation-associated 1-like protein 1 (High-risk human papilloma viruses E6 oncoproteins targeted protein 1) (E6-targeted protein 1) [MASS=199940]                                                                                   | *    | 2.05  | *    | *    | *  | 2 | 3 | VAVATLSHEQM[147]IDLLR           | 1 |
|                                                                                                                                                                                                                                                                              |      |       |      |      |    |   | 2 | SSPVSQGSSVSLNSNDSAM[147]LK      | 1 |
| SIM2_HUMAN (Q14190) Single-minded homolog 2 [MASS=73218]                                                                                                                                                                                                                     | *    | 1.50  | *    | *    | *  | 1 | 2 | TALSTSQETR                      | 1 |
| SIRB1_HUMAN (O00241) Signal-regulatory protein beta-1 precursor (SIRP-beta-1) (CD172b antigen) [MASS=43255]                                                                                                                                                                  | 0.97 | 10.55 | 0.26 | 0.00 | 2  | 2 | 2 | GTANLSEAIRVPPTLEVTQQPMR         | 1 |
|                                                                                                                                                                                                                                                                              |      |       |      |      |    |   | 3 | ATPEHTVSFTC[330]ESHGFSPR        | 1 |
|                                                                                                                                                                                                                                                                              |      |       |      |      |    |   | 3 | ATPEHTVSFTC[339]ESHGFSPR        | 1 |
|                                                                                                                                                                                                                                                                              |      |       |      |      |    |   | 2 | ATPEHTVSFTC[339]ESHGFSPR        | 1 |
| SIRT2_HUMAN (Q8IXJ6) NAD-dependent deacetylase sirtuin-2 (EC 3.5.1.-) (SIR2-like) (SIR2-like protein 2) [MASS=43182]                                                                                                                                                         | 0.99 | 5.66  | 1.18 | 0.05 | 2  | 1 | 3 | C[339]EDC[339]QSLVKPDIFFGESLPAR | 2 |
| SLIT1_HUMAN (O75093) Slit homolog 1 protein precursor (Slit-1) (Multiple epidermal growth factor-like domains 4) [MASS=167924]                                                                                                                                               | *    | 3.19  | *    | *    | *  | 2 | 3 | HYTLNSEAPLYVGGMPVDVNSAAFR       | 1 |
|                                                                                                                                                                                                                                                                              |      |       |      |      |    |   | 2 | NDFAGLKQLRVLQLM[147]ENQIGAVER   | 1 |

|                                                                                                                                                                                                                                                                              |      |       |      |      |   |   |   |                                        |    |
|------------------------------------------------------------------------------------------------------------------------------------------------------------------------------------------------------------------------------------------------------------------------------|------|-------|------|------|---|---|---|----------------------------------------|----|
|                                                                                                                                                                                                                                                                              |      |       |      |      |   |   | 2 | GYEYC[339]R                            | 12 |
| SMCA1_HUMAN (P28370) Probable global transcription activator SNF2L1 (EC 3.6.1.-) (ATP-dependent helicase SMARCA1) (SWI/SNF-related matrix-associated actin-dependent regulator of chromatin subfamily A member 1) [MASS=114731]                                              | *    | 0.61  | *    | *    | * | 1 |   |                                        |    |
|                                                                                                                                                                                                                                                                              |      |       |      |      |   |   | 2 | RLC[330]GLKVEVDM[147]EK                | 5  |
| SMCE1_HUMAN (Q969G3) SWI/SNF-related matrix-associated actin-dependent regulator of chromatin subfamily E member 1 (BRG1-associated factor 57) [MASS=46649]                                                                                                                  | 0.00 | 11.44 | 0.12 | 0.00 | 2 | 2 |   |                                        |    |
|                                                                                                                                                                                                                                                                              |      |       |      |      |   |   | 3 | DDENIPMETEETHLEETTESQQNGEEGTSTPEDK     | 1  |
| SMOC1_HUMAN (Q9H4F8) SPARC-related modular calcium-binding protein 1 precursor (Secreted modular calcium-binding protein 1) (SMOC-1) [MASS=48162]                                                                                                                            | *    | 4.61  | *    | *    | * | 1 | 2 | C[330]ARLLTPHLLLVQLSPAR                | 1  |
| SMOO_HUMAN (P53814) Smoothelin [MASS=99516]                                                                                                                                                                                                                                  | *    | 2.40  | *    | *    | * | 1 | 2 | EQRGVAQPLAQLRSC[339]PQEEGPR            | 1  |
| SMRA3_HUMAN (Q14527) SWI/SNF-related matrix-associated actin-dependent regulator of chromatin subfamily A member 3 (EC 3.6.1.-) (Sucrose nonfermenting protein 2-like 3) (DNA-binding protein/plasminogen activator inhibitor 1 regulator) (Helicase-like tran [MASS=113928] | 0.00 | 7.93  | 0.87 | 0.00 | 1 | 3 | 3 | GHVVGRLRYTGVVNNEM[147]VALQRDPNNPYDK    | 1  |
|                                                                                                                                                                                                                                                                              |      |       |      |      |   |   | 2 | EYNVNDSDSMKLGNNNTSEKADGLSK             | 1  |
|                                                                                                                                                                                                                                                                              |      |       |      |      |   |   | 3 | RVESIQC[330]FQNTTEAGSPTIM[147]LLSLK    | 1  |
| SMRC1_HUMAN (Q92922) SWI/SNF-related matrix-associated actin-dependent regulator of chromatin subfamily C member 1 (SWI/SNF complex 155 kDa subunit) (BRG1-associated factor 155) [MASS=122752]                                                                              | 0.00 | 4.34  | 0.10 | 0.00 | 1 | 2 | 2 | M[147]AAAAGGGPGTAVGATGSGIAAAAAGLAVYRRK | 1  |
|                                                                                                                                                                                                                                                                              |      |       |      |      |   |   | 2 | AGGALC[330]HILGAAYK                    | 1  |



|                                                                                                                                                                                      |      |       |      |      |   |   |   |                                                    |   |
|--------------------------------------------------------------------------------------------------------------------------------------------------------------------------------------|------|-------|------|------|---|---|---|----------------------------------------------------|---|
| SMYD3_HUMAN (Q9H7B4) SET and MYND domain-containing protein 3 (EC 2.1.1.43) (Zinc finger MYND domain-containing protein 1) [MASS=49083]                                              | *    | 12.15 | *    | *    | * | 2 | 3 | VLDC[339]AM[147]DAC[330]INLGLLEEALFYGTRTM[147]EPYR | 1 |
|                                                                                                                                                                                      |      |       |      |      |   |   | 2 | GVQVM[147]KVGKQLQLHQGM[147]FPQAMK                  | 1 |
| SMYD4_HUMAN (Q8IYR2) SET and MYND domain-containing protein 4 [MASS=89122]                                                                                                           | 0.00 | 7.96  | 0.82 | 0.47 | 3 | 3 | 2 | AAEVLSLHC[339]GPWDDEIQELQKM[147]K                  | 1 |
|                                                                                                                                                                                      |      |       |      |      |   |   | 2 | HM[147]LQLQC[330]NAQAMTTIQHTGPK                    | 1 |
|                                                                                                                                                                                      |      |       |      |      |   |   | 2 | AAVTPELC[339]PDVTIWGVAM[147]LR                     | 1 |
| SNAB_HUMAN (Q9H115) Beta-soluble NSF attachment protein (SNAP-beta) (N-ethylmaleimide-sensitive factor attachment protein, beta) [MASS=33557]                                        | 1.00 | 14.09 | 0.88 | 0.14 | 3 | 3 | 2 | AALC[339]HFIVDELNAK                                | 1 |
|                                                                                                                                                                                      |      |       |      |      |   |   | 2 | AALC[330]HFIVDELNAKLALEK                           | 1 |
|                                                                                                                                                                                      |      |       |      |      |   |   | 2 | VKASHSFLR                                          | 3 |
|                                                                                                                                                                                      |      |       |      |      |   |   | 2 | AALC[330]HFIVDELNAK                                | 2 |
| SNAT_HUMAN (Q16613) Serotonin N-acetyltransferase (EC 2.3.1.87) (Aralkylamine N-acetyltransferase) (AA-NAT) (Serotonin acetylase) [MASS=23344]                                       | *    | 4.83  | *    | *    | * | 1 | 3 | RHTLPASEFR                                         | 1 |
| SNTB2_HUMAN (Q13425) Beta-2-syntrophin (59 kDa dystrophin-associated protein A1 basic component 2) (Syntrophin 3) (SNT3) (Syntrophin-like) (SNTL) [MASS=57949]                       | *    | 6.85  | *    | *    | * | 2 | 2 | PIVFLHTFLSAKVTR                                    | 1 |
|                                                                                                                                                                                      |      |       |      |      |   |   | 3 | PIVFLHTFLSAKVTRM[147]GLLV                          | 1 |
| SNX23_HUMAN (Q96L93) Kinesin-like motor protein C20orf23 (Sorting nexin-23) [MASS=152010]                                                                                            | 0.00 | 4.10  | *    | *    | * | 3 | 1 | LASLNSGSR                                          | 2 |
|                                                                                                                                                                                      |      |       |      |      |   |   | 2 | SHAIFTIKFTQAKFDSEM[147]PC[339]ETVSK                | 1 |
|                                                                                                                                                                                      |      |       |      |      |   |   | 3 | LQDLHRVISEGC[330]STSADTMK                          | 1 |
| SODC_HUMAN (P00441) Superoxide dismutase [Cu-Zn] (EC 1.15.1.1) [MASS=15804]                                                                                                          | *    | 3.92  | *    | *    | * | 1 | 1 | VWGSIK                                             | 2 |
| SON_HUMAN (P18583) SON protein (SON3) (Negative regulatory element-binding protein) (NRE-binding protein) (DBP-5) (Bax antagonist selected in saccharomyces 1) (BASS1) [MASS=263845] | *    | 3.50  | *    | *    | * | 4 | 3 | SMM[147]SPMADRSMMSMGADRSMSSSYAADR                  | 1 |
|                                                                                                                                                                                      |      |       |      |      |   |   | 2 | SMMSPMAERSMMSAYERSMMSAYER                          | 1 |
|                                                                                                                                                                                      |      |       |      |      |   |   | 2 | DLSGKHPVSALM[147]EIC[339]NK                        | 1 |
|                                                                                                                                                                                      |      |       |      |      |   |   | 3 | SMMSPM[147]AERSMMSAYERSMMSAYER                     | 1 |
|                                                                                                                                                                                      |      |       |      |      |   |   | 2 | HFLFRVLRNGALTR                                     | 1 |
| SORCN_HUMAN (P30626) Sorcin (22 kDa protein) (CP-22) (V19) [MASS=21676]                                                                                                              | 0.88 | 16.16 | 0.73 | 0.06 | 2 | 2 | 3 | C[339]LTQSGIAGGYKPFNLETC[339]R                     | 1 |
|                                                                                                                                                                                      |      |       |      |      |   |   | 2 | ITFDDYIAC[330]C[330]VK                             | 1 |

|                                                                                                                                                                                                                                                                            |      |       |      |      |   |   |   |                                       |   |
|----------------------------------------------------------------------------------------------------------------------------------------------------------------------------------------------------------------------------------------------------------------------------|------|-------|------|------|---|---|---|---------------------------------------|---|
| SPAG1_HUMAN (Q07617) Sperm-associated antigen 1 (Infertility-related sperm protein Spag-1) (HSD-3.8) [MASS=103600]                                                                                                                                                         | *    | 3.13  | *    | *    | * | 1 | 3 | SGEEGYPELTEFC[339]EKHLQALAPESRALR     | 1 |
| SPAG6_HUMAN (O75602) Sperm-associated antigen 6 (PF16 protein homolog) (Sperm flagellar protein) (Repro-SA-1) [MASS=55476]                                                                                                                                                 | *    | 5.89  | *    | *    | * | 1 | 2 | AVAVTNTLPVLLSLYMSTESSEDLQVKSCK        | 1 |
| SPAG8_HUMAN (Q99932) Sperm-associated antigen 8 (Sperm membrane protein 1) (SMP-1) (HSD-1) (Sperm membrane protein BS-84) [MASS=44818]                                                                                                                                     | *    | 3.76  | *    | *    | * | 1 | 2 | PHDYRQEQPETFWIQR                      | 1 |
| SPAST_HUMAN (Q9UBP0) Spastin [MASS=67197]                                                                                                                                                                                                                                  | *    | 2.44  | *    | *    | * | 1 | 2 | SQTDVYNDSTNLAC[339]JR                 | 1 |
| SPN90_HUMAN (Q9NZQ3) SH3 adapter protein SPIN90 (NCK-interacting protein with SH3 domain) (SH3 protein interacting with Nck, 90 kDa) (VacA-interacting protein, 54 kDa) (VIP54) (AF3p21) (Diaphanous protein-interacting protein) (Dia-interacting protein 1) [MASS=78960] | 0.00 | 8.86  | 0.13 | 0.00 | 1 | 3 | 3 | M[147]EYLSLMHAIVRTTPYLQHR             | 1 |
|                                                                                                                                                                                                                                                                            |      |       |      |      |   |   | 3 | LRMEYLSLMHAIVRTTPYLQHR                | 1 |
|                                                                                                                                                                                                                                                                            |      |       |      |      |   |   | 3 | M[147]C[330]KRNEFESVLALVAYYQM[147]EHR | 1 |
| SPR1B_HUMAN (P22528) Cornifin B (Small proline-rich protein IB) (SPR-IB) (14.9 kDa pancornulin) [MASS=9888]                                                                                                                                                                | 0.00 | 23.60 | 2.07 | 0.00 | 1 | 1 | 2 | VPEPC[339]PSIVTPAPAQQKTKQK            | 1 |
| SPSY_HUMAN (P52788) Spermine synthase (EC 2.5.1.22) (Spermidine aminopropyltransferase) (SPMSY) [MASS=41268]                                                                                                                                                               | *    | 12.02 | *    | *    | * | 2 | 3 | EGREFDYVINDLTAVPISTSPPEEDSTWEFLR      | 1 |
|                                                                                                                                                                                                                                                                            |      |       |      |      |   |   | 2 | RLPPIVRGGIDR                          | 1 |
| SPT5H_HUMAN (O00267) Transcription elongation factor SPT5 (hSPT5) (DRB sensitivity-inducing factor large subunit) (DSIF large subunit) (DSIF p160) (Tat-cotransactivator 1 protein) (Tat-CT1 protein) [MASS=120999]                                                        | *    | 2.76  | *    | *    | * | 2 | 2 | IGEERATAISLMRK                        | 1 |
|                                                                                                                                                                                                                                                                            |      |       |      |      |   |   | 2 | SVTGGMC[330]SVYLYKDSEK                | 1 |
| SPTA2_HUMAN (Q13813) Spectrin alpha chain, brain (Spectrin, non-erythroid alpha chain) (Alpha-II spectrin) (Fodrin alpha chain) [MASS=284537]                                                                                                                              | *    | 2.22  | *    | *    | * | 3 | 2 | EANKQQNFNTGIK                         | 1 |
|                                                                                                                                                                                                                                                                            |      |       |      |      |   |   | 2 | QFQDAGHFDAENIKKK                      | 1 |
|                                                                                                                                                                                                                                                                            |      |       |      |      |   |   | 2 | FLSDFRDLMSWINGIRGLVSSDELAK            | 1 |

|                                                                                                                                                                              |      |       |      |      |   |   |   |                                                 |   |
|------------------------------------------------------------------------------------------------------------------------------------------------------------------------------|------|-------|------|------|---|---|---|-------------------------------------------------|---|
| SPTA3_HUMAN (Q8NHX4) Spermatogenesis-associated protein 3 (Testis spermatocyte apoptosis-related protein 1) (Testis and spermatogenesis cell-related protein 1) [MASS=19949] | *    | 12.57 | *    | *    | * | 1 | 2 | PSSHRNAC[330]PPSPRNC[339]GC[339]GSGGSR          | 1 |
| SPTB1_HUMAN (P11277) Spectrin beta chain, erythrocyte (Beta-I spectrin) [MASS=246189]                                                                                        | 0.98 | 4.17  | 0.74 | 0.00 | 1 | 5 | 2 | VHTAFERELHLLGVQVQQFQDVATRLQTAYAGEK              | 1 |
|                                                                                                                                                                              |      |       |      |      |   |   | 3 | HRELPEDVGLDASTAESFHR                            | 1 |
|                                                                                                                                                                              |      |       |      |      |   |   | 2 | IHC[330]LENVDK                                  | 1 |
|                                                                                                                                                                              |      |       |      |      |   |   | 2 | IKALADEREVVQK                                   | 1 |
|                                                                                                                                                                              |      |       |      |      |   |   | 3 | FFWEMDEAESWIK                                   | 1 |
| SPTB2_HUMAN (Q01082) Spectrin beta chain, brain 1 (Spectrin, non-erythroid beta chain 1) (Beta-II spectrin) (Fodrin beta chain) [MASS=274629]                                | 0.98 | 2.16  | *    | *    | * | 2 | 2 | TKVIESTQDLGNDLAGVM[147]ALQR                     | 1 |
|                                                                                                                                                                              |      |       |      |      |   |   | 3 | TALPAQSAATLPARTQETPSAQMEGFLNR                   | 1 |
|                                                                                                                                                                              |      |       |      |      |   |   | 2 | LREVQTGWEDLRATMR                                | 1 |
| SPTN2_HUMAN (O15020) Spectrin beta chain, brain 2 (Spectrin, non-erythroid beta chain 2) (Beta-III spectrin) [MASS=271293]                                                   | 0.98 | 3.35  | *    | *    | * | 5 | 3 | FREFSRDTSTIGQER                                 | 1 |
|                                                                                                                                                                              |      |       |      |      |   |   | 2 | RERLQEHLR                                       | 1 |
|                                                                                                                                                                              |      |       |      |      |   |   | 2 | EVQTGWEDLRATMRR                                 | 1 |
|                                                                                                                                                                              |      |       |      |      |   |   | 2 | GM[147]TRAMTM[147]PPVSPVGAEGPVVLRSK             | 1 |
|                                                                                                                                                                              |      |       |      |      |   |   | 2 | YDGYTSC[339]PLVTGYNR                            | 1 |
| SQRD_HUMAN (Q9Y6N5) Sulfide:quinone oxidoreductase, mitochondrial precursor (EC 1.-.-.) [MASS=49960]                                                                         | 0.00 | 4.67  | 3.64 | 0.00 | 1 | 2 | 1 | ALQDFK                                          | 1 |
| SRC_HUMAN (P12931) Proto-oncogene tyrosine-protein kinase Src (EC 2.7.10.2) (p60-Src) (c-Src) (pp60c-src) [MASS=59703]                                                       | 0.00 | 8.60  | 5.44 | 0.00 | 1 | 3 | 2 | HADGLC[339]HR                                   | 1 |
|                                                                                                                                                                              |      |       |      |      |   |   | 2 | LTTVC[339]PTSKPQTQGLAK                          | 1 |
|                                                                                                                                                                              |      |       |      |      |   |   | 3 | MPC[339]PPEC[339]PESLHDLML[147]C[330]QC[330]WRK | 1 |
| SSDH_HUMAN (P51649) Succinate semialdehyde dehydrogenase, mitochondrial precursor (EC 1.2.1.24) (NAD(+)-dependent succinic semialdehyde dehydrogenase) [MASS=57214]          | 1.00 | 5.79  | 2.02 | 0.13 | 3 | 1 | 3 | NFFEPTLLC[330]NVTQDM[147]LC[339]THEETFGPLAPVIK  | 1 |
|                                                                                                                                                                              |      |       |      |      |   |   | 3 | NFFEPTLLC[339]NVTQDM[147]LC[339]THEETFGPLAPVIK  | 2 |
|                                                                                                                                                                              |      |       |      |      |   |   | 3 | NFFEPTLLC[330]NVTQDM[147]LC[330]THEETFGPLAPVIK  | 1 |
| ST18_HUMAN (O60284) Suppression of tumorigenicity protein 18 (Zinc finger protein 387) [MASS=115154]                                                                         | *    | 4.01  | *    | *    | * | 3 | 2 | GGVKMTPKKEEK                                    | 1 |
|                                                                                                                                                                              |      |       |      |      |   |   | 2 | C[339]PVI[339]GC[339]DGQGHISGK                  | 1 |
|                                                                                                                                                                              |      |       |      |      |   |   | 2 | RQKENPLNGASLSWK                                 | 1 |

|                                                                                                                                                                                                                                                                              |      |       |      |      |    |   |                                                     |                                                                                                                                                                                                                        |                                                |
|------------------------------------------------------------------------------------------------------------------------------------------------------------------------------------------------------------------------------------------------------------------------------|------|-------|------|------|----|---|-----------------------------------------------------|------------------------------------------------------------------------------------------------------------------------------------------------------------------------------------------------------------------------|------------------------------------------------|
| STAB2_HUMAN (Q8WWQ8) Stabilin-2 precursor (FEEL-2 protein) (Fasciadin EGF-like laminin-type EGF-like and link domain-containing scavenger receptor 1) (FAS1 EGF-like and X-link domain-containing adhesion molecule 2) (Hyaluronan receptor for endocytosis) [ [MASS=277027] | *    | 4.59  | *    | *    | *  | 6 | 3<br>2<br>3<br>3<br>2<br>2                          | C[330]PDGYTM[147]ITSGSVGVRDC[330]R<br>TYLSLPGC[330]RHIC[339]R<br>QQPENISNPLYESTTSAPPEPSYDPFTDSEER<br>C[330]PANSEPTALFTHRC[339]VYSGR<br>C[330]LC[339]VHGTC[330]NNR<br>EAC[339]JANEAAATMATYNQLSYAQK                      | 1<br>1<br>1<br>1<br>1<br>1                     |
| STAG2_HUMAN (Q8N3U4) Cohesin subunit SA-2 (Stromal antigen 2) (SCC3 homolog 2) [MASS=141326]                                                                                                                                                                                 | *    | 3.33  | *    | *    | *  | 2 | 3<br>3                                              | GVVTAEMFRHMQNSEIIR<br>M[147]NGHHQQNGVENMMLFEVVKMGK                                                                                                                                                                     | 1<br>1                                         |
| STAR8_HUMAN (Q92502) StAR-related lipid transfer protein 8 (StARD8) (START domain-containing protein 8) [MASS=112600]                                                                                                                                                        | 0.00 | 8.11  | 1.45 | 0.00 | 1  | 4 | 3<br>2<br>2<br>3                                    | IRDSFPTLQAAGPETKL<br>PGPRDLSDNMAATQGLSHM[147]ISDC[339]K<br>SPDWYNKVFHLC[339]AM[147]EVAK<br>SLSIESLC[330]PEDGHRLADWQPGR                                                                                                 | 1<br>1<br>1<br>1                               |
| STS_HUMAN (P08842) Steryl-sulfatase precursor (EC 3.1.6.2) (Steroid sulfatase) (Steryl-sulfate sulfohydrolase) (Arylsulfatase C) (ASC) [MASS=65492]                                                                                                                          | *    | 10.98 | *    | *    | *  | 3 | 3<br>3<br>2                                         | LASGGVKLTQHAAASPLC[330]TPSRAAFMTGR<br>PWLQLC[339]C[330]PSTGLSC[330]QC[330]DREKQDK<br>ERNPLTPASEPR                                                                                                                      | 1<br>1<br>1                                    |
| STX11_HUMAN (O75558) Syntaxin-11 [MASS=33196]                                                                                                                                                                                                                                | *    | 2.44  | *    | *    | *  | 1 | 1<br><br>2<br>2<br><br>2                            | QLEIM[147]GK<br><br>YSTHLHLAEDC[330]M[147]K<br>LAEQIATLC[330]ATLK<br><br>YSTHLHLAEDC[330]MK                                                                                                                            | 1<br><br>1<br>2<br><br>2                       |
| STXB1_HUMAN (P61764) Syntaxin-binding protein 1 (Unc-18 homolog) (Unc-18A) (Unc-18-1) (N-Sec1) (p67) [MASS=67568]                                                                                                                                                            | 1.00 | 16.84 | 0.65 | 0.26 | 11 | 7 | 2<br>2<br>2<br>3<br>2<br>2<br>2<br>2<br>2<br>2<br>3 | C[330]AYEVTQANGK<br>C[339]AYEVTQANGK<br>YSTHLHLAEDC[339]M[147]K<br>YSTHLHLAEDC[330]MKHYQGTVDK<br>RMNTGEKTTMR<br>LAEQIATLC[339]ATLK<br>HYQGTVDKLC[330]R<br>AAHVFFTDSC[330]PDALFNELVK<br>YSTHLHLAEDC[330]M[147]KHYQGTVDK | 1<br>1<br>1<br>1<br>1<br>1<br>1<br>1<br>1<br>1 |
| SUCA_HUMAN (P53597) Succinyl-CoA ligase [GDP-forming] alpha-chain, mitochondrial precursor (EC 6.2.1.4) (Succinyl-CoA synthetase, alpha chain) (SCS-alpha) [MASS=35047]                                                                                                      | 0.00 | 12.01 | 1.00 | 0.00 | 1  | 2 | 3<br>2                                              | QGFTHSQQALEYGTKLVGGTTTPGK<br>LIGPNC[339]PGVINPGEC[339]K                                                                                                                                                                | 1<br>1                                         |

|                                                                                                                                                                                                                                                 |      |      |      |      |   |   |   |                                      |   |
|-------------------------------------------------------------------------------------------------------------------------------------------------------------------------------------------------------------------------------------------------|------|------|------|------|---|---|---|--------------------------------------|---|
| SUCB1_HUMAN (Q9P2R7) Succinyl-CoA ligase [ADP-forming] beta-chain, mitochondrial precursor (EC 6.2.1.5) (Succinyl-CoA synthetase, betaA chain) (SCS-betaA) (ATP-specific succinyl-CoA synthetase subunit beta) (NY-REN-39 antigen) [MASS=50317] | *    | 9.07 | *    | *    | * | 2 | 2 | TAQRAAAQVLGSSGLFNNHGLQVQQQQQR        | 1 |
|                                                                                                                                                                                                                                                 |      |      |      |      |   |   | 3 | INFDSNSAYRQKK                        | 1 |
| SURF4_HUMAN (O15260) Surfeit locus protein 4 [MASS=30394]                                                                                                                                                                                       | *    | 4.83 | *    | *    | * | 1 | 2 | ESSPKQYM[147]QLGGR                   | 1 |
| SV2A_HUMAN (Q7L0J3) Synaptic vesicle glycoprotein 2A [MASS=82695]                                                                                                                                                                               | *    | 2.16 | *    | *    | * | 1 | 2 | VEHVTFNFTLENQIHR                     | 1 |
|                                                                                                                                                                                                                                                 |      |      |      |      |   |   | 2 | EVGRTAANKIK                          | 1 |
|                                                                                                                                                                                                                                                 |      |      |      |      |   |   | 3 | PQDSSEQPQEKLC[330]KNPC[330]AMFAAGEIK | 1 |
|                                                                                                                                                                                                                                                 |      |      |      |      |   |   | 3 | SKYC[330]TETSGVHGDSPIYSGTMDTHSLESK   | 1 |
|                                                                                                                                                                                                                                                 |      |      |      |      |   |   | 3 | VQASKNPLKM[147]LAAR                  | 8 |
| SVIL_HUMAN (O95425) Supervillin (Archvillin) (p205/p250) [MASS=247705]                                                                                                                                                                          | *    | 3.61 | *    | *    | * | 4 |   |                                      |   |
| SYA_HUMAN (P49588) Alanyl-tRNA synthetase (EC 6.1.1.7) (Alanine--tRNA ligase) (AlaRS) (NY-REN-42 antigen) [MASS=106801]                                                                                                                         | 0.77 | 4.96 | 1.03 | 0.00 | 1 | 2 | 2 | NVGC[330]LQEALQLATSFAQLR             | 1 |
|                                                                                                                                                                                                                                                 |      |      |      |      |   |   | 2 | VLEKTKQFIDSNPNQPLVILEMESGASAK        | 1 |
| SYEP_HUMAN (P07814) Bifunctional aminoacyl-tRNA synthetase [Includes: Glutamyl-tRNA synthetase (EC 6.1.1.17) (Glutamate--tRNA ligase); Prolyl-tRNA synthetase (EC 6.1.1.15) (Proline--tRNA ligase)] [MASS=163025]                               | *    | 5.07 | *    | *    | * | 4 | 2 | VILEDVAM[147]LHIKPDQFTYTSDFHETIMK    | 1 |
|                                                                                                                                                                                                                                                 |      |      |      |      |   |   | 2 | GVPIRLEVGPDMK                        | 1 |
|                                                                                                                                                                                                                                                 |      |      |      |      |   |   | 2 | HEELMLGDPC[339]LKDLK                 | 1 |
|                                                                                                                                                                                                                                                 |      |      |      |      |   |   | 2 | SEM[147]IEYHDISGC[339]YILR           | 1 |
| SYFA_HUMAN (Q9Y285) Phenylalanyl-tRNA synthetase alpha chain (EC 6.1.1.20) (Phenylalanine--tRNA ligase alpha chain) (PheRS) (CML33) [MASS=57432]                                                                                                | *    | 2.17 | *    | *    | * | 1 | 2 | WVEVGNSGVFR                          | 1 |
| SYFB_HUMAN (Q9NSD9) Phenylalanyl-tRNA synthetase beta chain (EC 6.1.1.20) (Phenylalanine--tRNA ligase beta chain) (PheRS) [MASS=66129]                                                                                                          | 0.83 | 7.30 | 0.96 | 0.00 | 1 | 3 | 2 | LHQNIC[339]R                         | 1 |
|                                                                                                                                                                                                                                                 |      |      |      |      |   |   | 2 | RALVAIGTHDLDTLSPFTYTAK               | 1 |
|                                                                                                                                                                                                                                                 |      |      |      |      |   |   | 3 | NPGFEIHHGLLDR                        | 1 |

|                                                                                                                                                                                                   |                             |      |      |      |    |    |   |                                                    |   |
|---------------------------------------------------------------------------------------------------------------------------------------------------------------------------------------------------|-----------------------------|------|------|------|----|----|---|----------------------------------------------------|---|
| SYHH_HUMAN (P49590) Histidyl-tRNA synthetase homolog (EC 6.1.1.21) (Histidine--tRNA ligase homolog) (HisRS) [MASS=56888]                                                                          | *                           | 2.57 | *    | *    | *  | 1  | 2 | VWRRESPTIVQGR                                      | 1 |
| SYIM_HUMAN (Q9NSE4) Isoleucyl-tRNA synthetase, mitochondrial precursor (EC 6.1.1.5) (Isoleucine--tRNA ligase) (IleRS) [MASS=113791]                                                               | 0.99                        | 7.11 | 1.40 | 0.00 | 1  | 4  | 3 | DQLGGWFQSSLLTVAARKR                                | 1 |
|                                                                                                                                                                                                   |                             |      |      |      |    |    | 3 | C[339]WKYTAESSDTLC[339]PR                          | 1 |
|                                                                                                                                                                                                   |                             |      |      |      |    |    | 2 | KPGLEEAVESAC[339]AM[147]R                          | 1 |
|                                                                                                                                                                                                   |                             |      |      |      |    |    | 2 | LLVRSVSGASNHQPNSNSGRYR                             | 1 |
| SYM_HUMAN (P56192) Methionyl-tRNA synthetase (EC 6.1.1.10) (Methionine--tRNA ligase) (MetRS) [MASS=101115]                                                                                        | 0.97                        | 2.22 | 0.78 | 0.00 | 1  | 1  | 2 | VPVLQLDSGNLYLFSTSAIC[330]R                         | 1 |
|                                                                                                                                                                                                   |                             |      |      |      |    |    | 3 | ATEM[147]IDQLQDKLPGSSAEKASK                        | 1 |
| SYNE1_HUMAN (Q8NF91) Nesprin-1 (Nuclear envelope spectrin repeat protein 1) (Synaptic nuclear envelope protein 1) (Syne-1) (Myocyte nuclear envelope protein 1) (Myne-1) (Enaptin) [MASS=1011035] | 0.00                        | 2.76 | 0.59 | 0.00 | 1  | 12 | 2 | HSELELNIAQNMVSQVK                                  | 2 |
|                                                                                                                                                                                                   |                             |      |      |      |    |    | 3 | DFEVSAEPIQDWLSKTEKMVHESSNR                         | 1 |
|                                                                                                                                                                                                   |                             |      |      |      |    |    | 2 | DKQALQDC[330]ASELGSFEDQHRK                         | 1 |
|                                                                                                                                                                                                   |                             |      |      |      |    |    | 1 | DEAEQLAGK                                          | 1 |
|                                                                                                                                                                                                   |                             |      |      |      |    |    | 3 | MKWESLHQEFSTKQK                                    | 1 |
|                                                                                                                                                                                                   |                             |      |      |      |    |    | 2 | DLPQIINK                                           | 1 |
|                                                                                                                                                                                                   |                             |      |      |      |    |    | 3 | QLGKALDDSRFQIQQTENIIR                              | 1 |
|                                                                                                                                                                                                   |                             |      |      |      |    |    | 3 | QSPPPDM[147]AQNLLM[147]DHLAIC[330]SELEAKQM[147]LLK | 1 |
|                                                                                                                                                                                                   |                             |      |      |      |    |    | 2 | LLALLEVLSGQKLPC[330]EQGR                           | 1 |
|                                                                                                                                                                                                   |                             |      |      |      |    |    | 2 | TPTGPELDTSYKGYM[147]KLLGEC[330]SSSIDSVK            | 1 |
| 2                                                                                                                                                                                                 | ITLYQHLLKSSLNEYQPKLYQVLDDGK | 1    |      |      |    |    |   |                                                    |   |
| SYNPR_HUMAN (Q8TBG9) Synaptoporin [MASS=29166]                                                                                                                                                    | 0.99                        | 5.28 | 0.64 | 0.00 | 1  | 1  | 2 | LHQVTFEVPTC[330]EGK                                | 1 |
|                                                                                                                                                                                                   |                             |      |      |      |    |    | 1 | LHQVYFDAPTC[330]R                                  | 2 |
|                                                                                                                                                                                                   |                             |      |      |      |    |    | 2 | LHQVYFDAPTC[339]R                                  | 1 |
| SYPH_HUMAN (P08247) Synaptophysin (Major synaptic vesicle protein p38) [MASS=33845]                                                                                                               | 1.00                        | 5.75 | 0.43 | 0.19 | 10 | 2  | 2 | EM[147]PVC[339]R                                   | 2 |
|                                                                                                                                                                                                   |                             |      |      |      |    |    | 1 | LHQVYFDAPTC[339]R                                  | 1 |
|                                                                                                                                                                                                   |                             |      |      |      |    |    | 2 | LHQVYFDAPTC[330]R                                  | 2 |
|                                                                                                                                                                                                   |                             |      |      |      |    |    | 2 | EM[147]PVC[330]R                                   | 3 |
| SYT11_HUMAN (Q9BT88) Synaptotagmin-11 (Synaptotagmin XI) (SytXI) [MASS=48306]                                                                                                                     | *                           | 5.57 | *    | *    | *  | 1  | 2 | GELQVLSYQPVAQRMTVVVLKAR                            | 1 |

|                                                                                                                                                                                                                                                                   |      |      |      |      |   |   |                  |                                                                                      |                  |
|-------------------------------------------------------------------------------------------------------------------------------------------------------------------------------------------------------------------------------------------------------------------|------|------|------|------|---|---|------------------|--------------------------------------------------------------------------------------|------------------|
| SYT1_HUMAN (P21579) Synaptotagmin-1 (Synaptotagmin I) (SytI) (p65) [MASS=47573]                                                                                                                                                                                   | *    | 2.61 | *    | *    | * | 1 | 2                | EKGGKNAINMK                                                                          | 1                |
| SYT7_HUMAN (O43581) Synaptotagmin-7 (Synaptotagmin VII) (SytVII) [MASS=45567]                                                                                                                                                                                     | *    | 5.97 | *    | *    | * | 1 | 3                | TVTMKRNLNPNFNESFAFDIPTEK                                                             | 1                |
| SYV_HUMAN (P26640) Valyl-tRNA synthetase (EC 6.1.1.9) (Valine--tRNA ligase) (ValRS) (Protein G7a) [MASS=140475]                                                                                                                                                   | 0.00 | 1.19 | 4.13 | 0.00 | 1 | 1 | 3                | C[339]SIHLQLQGLVDPAR                                                                 | 1                |
| SYW_HUMAN (P23381) Tryptophanyl-tRNA synthetase (EC 6.1.1.2) (Tryptophan--tRNA ligase) (TrpRS) (IFP53) (hWRS) [MASS=53165]                                                                                                                                        | *    | 1.70 | *    | *    | * | 1 | 2                | EVTDEIVK                                                                             | 1                |
| TAB1_HUMAN (Q15750) Mitogen-activated protein kinase kinase kinase 7-interacting protein 1 (TGF-beta-activated kinase 1-binding protein 1) (TAK1-binding protein 1) [MASS=54644]                                                                                  | 0.00 | 2.38 | 0.67 | 0.00 | 1 | 1 | 2                | QVGIIC[339]GQESTR                                                                    | 1                |
| TAB3_HUMAN (Q8N5C8) Mitogen-activated protein kinase kinase kinase 7-interacting protein 3 (TAK1-binding protein 3) (NF-kappa-B-activating protein 1) [MASS=78652]                                                                                                | *    | 6.18 | *    | *    | * | 2 | 3<br>2           | ALQILPQIPSNLYGSPGSIYIRQTSQSSSGR<br>YLYM[147]EYHSPDDNR                                | 1<br>1           |
| TAD2L_HUMAN (O75478) Transcriptional adapter 2-like (ADA2-like protein) [MASS=51496]                                                                                                                                                                              | *    | 5.42 | *    | *    | * | 1 | 3                | LVPGAYLEYKSALLNEC[330]NKQGGLR                                                        | 1                |
| TAP1_HUMAN (Q03518) Antigen peptide transporter 1 (APT1) (Peptide transporter TAP1) (ATP-binding cassette sub-family B member 2) (Peptide transporter PSF1) (Peptide supply factor 1) (PSF-1) (Peptide transporter involved in antigen processing 1) [MASS=80964] | 0.00 | 4.28 | 1.14 | 0.00 | 1 | 1 | 3                | GLC[339]LLGIMLWGSVSLTM[147]VTLITLPLLFLPKK                                            | 1                |
| TATD2_HUMAN (Q93075) TatD DNase domain-containing deoxyribonuclease 2 (EC 3.1.21.-) [MASS=85039]                                                                                                                                                                  | *    | 7.49 | *    | *    | * | 4 | 3<br>3<br>2<br>2 | HC[339]FTGSYPVIEPLLK<br>QIPLERIIVETDAPYFLPR<br>FSRSSEEREVK<br>LRDQGSTM[147]IYLK      | 1<br>1<br>1<br>1 |
| TAU_HUMAN (P10636) Microtubule-associated protein tau (Neurofibrillary tangle protein) (Paired helical filament-tau) (PHF-tau) [MASS=78746]                                                                                                                       | 1.00 | 5.55 | 1.16 | 0.08 | 2 | 2 | 2<br>2<br>3      | VTSKC[339]GSLGNIHHKPGGGQVEVK<br>C[339]GSLGNIHHKPGGGQVEVK<br>C[330]GSLGNIHHKPGGGQVEVK | 1<br>1<br>1      |

|                                                                                                                                   |      |       |      |      |    |   |  |   |                                              |   |
|-----------------------------------------------------------------------------------------------------------------------------------|------|-------|------|------|----|---|--|---|----------------------------------------------|---|
|                                                                                                                                   |      |       |      |      |    |   |  | 2 | SIQFVDWC[330]PTGFK                           | 2 |
|                                                                                                                                   |      |       |      |      |    |   |  | 2 | YMAC[339]C[339]LLYR                          | 1 |
|                                                                                                                                   |      |       |      |      |    |   |  | 2 | AYHEQLSVAEITNAC[330]FEPANQM[147]VK           | 1 |
|                                                                                                                                   |      |       |      |      |    |   |  | 2 | AYHEQLSVAEITNAC[339]FEPANQMVK                | 1 |
|                                                                                                                                   |      |       |      |      |    |   |  | 2 | YMAC[330]C[330]LLYR                          | 2 |
| TBA1_HUMAN (P68366) Tubulin alpha-1 chain<br>(Alpha-tubulin 1) (Testis-specific alpha-tubulin)<br>(Tubulin H2-alpha) [MASS=49924] | 1.00 | 17.41 | 0.71 | 0.10 | 9  | 4 |  | 2 | YM[147]AC[339]C[339]LLYR                     | 2 |
|                                                                                                                                   |      |       |      |      |    |   |  | 2 | SIQFVDWC[339]PTGFK                           | 2 |
|                                                                                                                                   |      |       |      |      |    |   |  | 2 | YM[147]AC[330]C[330]LLYR                     | 2 |
|                                                                                                                                   |      |       |      |      |    |   |  | 3 | LSDQC[339]TGLQGFLVFHSGGGTSGGFTSLLM[147]ER    | 1 |
|                                                                                                                                   |      |       |      |      |    |   |  | 2 | AYHEQLSVAEITNAC[339]FEPANQM[147]VK           | 1 |
|                                                                                                                                   |      |       |      |      |    |   |  | 3 | LSDQC[330]TGLQGFLVFHSGGGTSGGFTSLLM[147]ER    | 1 |
| TBA2_HUMAN (Q13748) Tubulin alpha-2 chain<br>(Alpha-tubulin 2) [MASS=49959]                                                       | 0.00 | 2.89  | *    | *    | *  | 1 |  | 2 | TIQFVDWC[330]PTGFK                           | 1 |
|                                                                                                                                   |      |       |      |      |    |   |  | 2 | TIQFVDWC[339]PTGFK                           | 1 |
|                                                                                                                                   |      |       |      |      |    |   |  | 3 | LADQC[339]TGLQGFLVFHSGGGTSGGFTSLLM[147]ER    | 4 |
| TBA3_HUMAN (Q71U36) Tubulin alpha-3<br>chain (Alpha-tubulin 3) (Tubulin B-alpha-1)<br>[MASS=50135]                                | 0.00 | 7.10  | *    | *    | *  | 1 |  | 3 | LADQC[339]TGLQGFLVFHSGGGTSGGFTSLLMER         | 3 |
|                                                                                                                                   |      |       |      |      |    |   |  | 3 | LADQC[330]TGLQGFLVFHSGGGTSGGFTSLLM[147]ER    | 3 |
| TBA6_HUMAN (Q9BQE3) Tubulin alpha-6<br>chain (Alpha-tubulin 6) [MASS=49895]                                                       | 1.00 | 5.35  | 0.82 | 0.17 | 13 | 1 |  | 3 | AYHEQLTVAEITNAC[339]FEPANQM[147]VK           | 1 |
| TBA8_HUMAN (Q9NY65) Tubulin alpha-8<br>chain (Alpha-tubulin 8) [MASS=50093]                                                       | 0.57 | 18.49 | 0.88 | 0.00 | 1  | 3 |  | 3 | IRKLTDAC[330]SGLQGFLIFHSGGGTSGGFTSLLM[147]ER | 1 |
|                                                                                                                                   |      |       |      |      |    |   |  | 2 | AYHEQLSVAEITSSC[330]FEPNSQM[147]VK           | 1 |
|                                                                                                                                   |      |       |      |      |    |   |  | 3 | HVPRAVM[147]IDLEPTVVDEVVAGTYR                | 1 |
|                                                                                                                                   |      |       |      |      |    |   |  | 2 | LAVNM[147]VPFPR                              | 1 |
|                                                                                                                                   |      |       |      |      |    |   |  | 2 | VAVC[330]DIPPR                               | 2 |
| TBB1_HUMAN (Q9H4B7) Tubulin beta-1 chain<br>[MASS=50327]                                                                          | 0.00 | 8.20  | *    | *    | *  | 4 |  | 2 | RGRYLTVAC[330]IFR                            | 1 |
|                                                                                                                                   |      |       |      |      |    |   |  | 2 | EEYPDR                                       | 1 |



|                                                                                |      |       |      |      |   |   |  |   |                                              |   |
|--------------------------------------------------------------------------------|------|-------|------|------|---|---|--|---|----------------------------------------------|---|
|                                                                                |      |       |      |      |   |   |  | 3 | LTTPTYGDLNHLVSATM[147]SGVTTC[330]LR          | 2 |
|                                                                                |      |       |      |      |   |   |  | 3 | EAESC[339]DC[339]LQGFQLTHSLGGGTGSGMGTLISK    | 1 |
|                                                                                |      |       |      |      |   |   |  | 2 | NM[147]M[147]AAC[339]DPRHGR                  | 1 |
|                                                                                |      |       |      |      |   |   |  | 2 | NM[147]MAAC[339]DPR                          | 1 |
|                                                                                |      |       |      |      |   |   |  | 3 | M[147]SM[147]KEVDEQM[147]LNVQNKNSYFVEWIPNNVK | 1 |
|                                                                                |      |       |      |      |   |   |  | 2 | LTTPTYGDLNHLVSATM[147]SGVTTC[330]LR          | 3 |
|                                                                                |      |       |      |      |   |   |  | 3 | LTTPTYGDLNHLVSATMSGVTTC[330]LR               | 1 |
|                                                                                |      |       |      |      |   |   |  | 1 | TAVC[330]DIPPR                               | 1 |
|                                                                                |      |       |      |      |   |   |  | 2 | NM[147]M[147]AAC[330]DPR                     | 3 |
| TBB2C_HUMAN (P68371) Tubulin beta-2C chain (Tubulin beta-2 chain) [MASS=49831] | 1.00 | 35.06 | 0.63 | 0.10 | 2 | 8 |  | 3 | LTTPTYGDLNHLVSATMSGVTTC[339]LR               | 1 |
|                                                                                |      |       |      |      |   |   |  | 2 | TAVC[330]DIPPR                               | 7 |
|                                                                                |      |       |      |      |   |   |  | 1 | GRM[147]SM[147]K                             | 1 |
|                                                                                |      |       |      |      |   |   |  | 2 | NM[147]M[147]AAC[339]DPR                     | 2 |
|                                                                                |      |       |      |      |   |   |  | 2 | LTTPTYGDLNHLVSATMSGVTTC[330]LR               | 2 |
|                                                                                |      |       |      |      |   |   |  | 3 | KEAESC[339]DC[339]LQGFQLTHSLGGGTGSGMGTLISK   | 1 |

|                                                                                                                                |      |       |      |      |    |   |   |                                                  |   |
|--------------------------------------------------------------------------------------------------------------------------------|------|-------|------|------|----|---|---|--------------------------------------------------|---|
|                                                                                                                                |      |       |      |      |    |   | 2 | LTTPTYGDLNHLVSATM[147]SGVTTC[339]LR              | 3 |
|                                                                                                                                |      |       |      |      |    |   | 3 | EAESC[330]DC[330]LQGFQLTHSLGGGTGSGMGTLISK        | 1 |
|                                                                                                                                |      |       |      |      |    |   | 2 | NMM[147]AAC[330]DPR                              | 4 |
| TBB2C_HUMAN (P68371) Tubulin beta-2C chain (Tubulin beta-2 chain) [MASS=49831]                                                 | 1.00 | 35.06 | 0.63 | 0.10 | 2  | 8 | 2 | NMM[147]AAC[339]DPR                              | 2 |
|                                                                                                                                |      |       |      |      |    |   | 3 | EAESC[330]DC[330]LQGFQLTHSLGGGTGSGM[147]GTLLISK  | 1 |
|                                                                                                                                |      |       |      |      |    |   | 2 | LTTPTYGDLNHLVSATMSGVTTC[339]LR                   | 2 |
|                                                                                                                                |      |       |      |      |    |   | 2 | TAVC[339]DIPPR                                   | 2 |
|                                                                                                                                |      |       |      |      |    |   | 1 | TAVC[339]DIPPR                                   | 1 |
|                                                                                                                                |      |       |      |      |    |   | 3 | KEAESC[330]DC[330]LQGFQLTHSLGGGTGSGM[147]GTLLISK | 1 |
|                                                                                                                                |      |       |      |      |    |   | 3 | KEAESC[339]DC[339]LQGFQLTHSLGGGTGSGM[147]GTLLISK | 3 |
|                                                                                                                                |      |       |      |      |    |   | 2 | EIVHIQAGQC[339]GNQIGAK                           | 3 |
| TBB2_HUMAN (P07437) Tubulin beta-2 chain [MASS=49671]                                                                          | 1.00 | 8.11  | 0.64 | 0.64 | 51 | 2 | 2 | EIVHIQAGQC[330]GNQIGAK                           | 3 |
|                                                                                                                                |      |       |      |      |    |   | 3 | EIVHIQAGQC[339]GNQIGAK                           | 1 |
|                                                                                                                                |      |       |      |      |    |   | 1 | EIVHIQAGQC[330]GNQIGAK                           | 1 |
|                                                                                                                                |      |       |      |      |    |   | 3 | M[147]REIVHIQAGQC[330]GNQIGAK                    | 1 |
|                                                                                                                                |      |       |      |      |    |   | 2 | M[147]REIVHIQAGQC[330]GNQIGAK                    | 2 |
| TBCD2_HUMAN (Q9BYX2) TBC1 domain family member 2 (Prostate antigen recognized and identified by SEREX) (PARIS-1) [MASS=104165] | *    | 3.05  | *    | *    | *  | 2 | 2 | FGGKGPIRGWK                                      | 1 |
|                                                                                                                                |      |       |      |      |    |   | 2 | ELVKILHKALEAAQKEK                                | 1 |
| TBCD4_HUMAN (O60343) TBC1 domain family member 4 (Akt substrate of 160 kDa) (AS160) [MASS=146562]                              | *    | 3.70  | *    | *    | *  | 3 | 3 | ATDPSQVPDVSSIR                                   | 1 |
|                                                                                                                                |      |       |      |      |    |   | 2 | LDYEEVGAC[330]QKEVLITWDKK                        | 1 |
|                                                                                                                                |      |       |      |      |    |   | 2 | NLTPDM[147]NTSEM[147]EK                          | 1 |
| TBCD5_HUMAN (Q92609) TBC1 domain family member 5 [MASS=89004]                                                                  | *    | 1.38  | *    | *    | *  | 1 | 2 | ARGADLM[147]NKSR                                 | 1 |

|                                                                                                                                                                                                                   |      |       |      |      |   |   |                  |                                                                                           |                  |
|-------------------------------------------------------------------------------------------------------------------------------------------------------------------------------------------------------------------|------|-------|------|------|---|---|------------------|-------------------------------------------------------------------------------------------|------------------|
| TBCD8_HUMAN (O95759) TBC1 domain family member 8 (Vascular Rab-GAP/TBC-containing protein) (AD 3) [MASS=102676]                                                                                                   | *    | 2.45  | *    | *    | * | 2 | 3                | AQNEFFRAFFR<br>DDGQALM[147]ILSR                                                           | 1<br>1           |
| TCF20_HUMAN (Q9UGU0) Transcription factor 20 (Stromelysin 1 PDGF-responsive element-binding protein) (SPRE-binding protein) (Nuclear factor SPBP) (AR1) [MASS=211770]                                             | *    | 1.02  | *    | *    | * | 1 | 2                | EEATSPGAKDM[147]PLSSDGNPK                                                                 | 1                |
| TCGAP_HUMAN (O14559) TC10/CDC42 GTPase-activating protein (Sorting nexin-26) [MASS=137212]                                                                                                                        | *    | 3.19  | *    | *    | * | 2 | 2<br>3           | GAEAPLTDAC[339]QQEM[147]C[330]SKLR<br>RLLLSEEASLNIPAVAAAHVIK                              | 1<br>1           |
| TCPH_HUMAN (Q99832) T-complex protein 1 subunit eta (TCP-1-eta) (CCT-eta) (HIV-1 Nef-interacting protein) [MASS=59366]                                                                                            | *    | 3.87  | *    | *    | * | 1 | 3                | MVVDAVM[147]M[147]LDDLLQLKMIGIK                                                           | 2                |
| TCPQ_HUMAN (P50990) T-complex protein 1 subunit theta (TCP-1-theta) (CCT-theta) (NY-REN-15 antigen) [MASS=59489]                                                                                                  | 0.00 | 2.56  | 0.47 | 0.00 | 1 | 1 | 2                | AHEILPNLVC[330]C[330]SAK                                                                  | 1                |
| TCRG1_HUMAN (O14776) Transcription elongation regulator 1 (TATA box-binding protein-associated factor 2S) (Transcription factor CA150) [MASS=123959]                                                              | 0.00 | 5.65  | 3.32 | 0.00 | 1 | 4 | 2<br>2<br>3<br>3 | QYIEKIAKNLDSEK<br>AIVPLEARM[147]K<br>VPLPGMPIPLPGVAM[147]MQIVSC[339]PYVK<br>AIVPLEARMKQFK | 1<br>1<br>1<br>1 |
| TDRD6_HUMAN (O60522) Tudor domain-containing protein 6 (Aantigen NY-CO-45) (Fragment) [MASS=85665]                                                                                                                | 0.00 | 2.52  | 0.25 | 0.00 | 1 | 1 | 2                | GELSPVPPNVPLSQEC[330]VTK                                                                  | 1                |
| TDRKH_HUMAN (Q9Y2W6) Tudor and KH domain-containing protein [MASS=67024]                                                                                                                                          | *    | 6.77  | *    | *    | * | 2 | 3<br>3           | VPQEAVKLIIGR<br>NTSSSMEPTAPLVTPPPKGGGDM[147]AVVVSK                                        | 1<br>1           |
| TEBP_HUMAN (Q15185) Prostaglandin E synthase 3 (EC 5.3.99.3) (Cytosolic prostaglandin E2 synthase) (cPGES) (Telomerase-binding protein p23) (Hsp90 co-chaperone) (Progesterone receptor complex p23) [MASS=18697] | 1.00 | 20.00 | 0.71 | 0.09 | 2 | 2 | 2<br>2           | HLNEIDLFHC[330]IDPNDSK<br>SKLTFSC[330]LGGSDNFK                                            | 1<br>1           |
| TENR_HUMAN (Q92752) Tenascin-R precursor (TN-R) (Restrictin) (Janusin) [MASS=149547]                                                                                                                              | 0.00 | 2.80  | 0.53 | 0.00 | 1 | 2 | 2<br>3           | QC[330]LNAC[330]SGR<br>LQVYC[339]DMTTDGGGWIVFQRRQNGQTDFFR                                 | 1<br>1           |

|                                                                                                                                                           |      |       |       |      |   |    |   |                                                  |   |
|-----------------------------------------------------------------------------------------------------------------------------------------------------------|------|-------|-------|------|---|----|---|--------------------------------------------------|---|
|                                                                                                                                                           |      |       |       |      |   |    | 2 | ASLYARQQLNVR                                     | 1 |
|                                                                                                                                                           |      |       |       |      |   |    | 1 | VGISSR                                           | 4 |
| TEP1_HUMAN (Q99973) Telomerase protein component 1 (Telomerase-associated protein 1) (Telomerase protein 1) (p240) (p80 telomerase homolog) [MASS=290413] | 0.00 | 10.28 | 1.39  | 0.00 | 1 | 13 | 3 | LQAQVQEFDENDGWSLNTFGKYLLSLAGQRVPVDR              | 1 |
|                                                                                                                                                           |      |       |       |      |   |    | 3 | ESGEFEERLNFDINLENPSRTLISITQAK                    | 1 |
|                                                                                                                                                           |      |       |       |      |   |    | 3 | VWDHQGVELTSIPAHSGPISHC[339]AAAM[147]EPR          | 1 |
|                                                                                                                                                           |      |       |       |      |   |    | 3 | DLLRSVLPALQAR                                    | 1 |
|                                                                                                                                                           |      |       |       |      |   |    | 3 | YFC[330]AIVQLPSDWIQVAELYQSLAEGDKNK               | 1 |
|                                                                                                                                                           |      |       |       |      |   |    | 2 | LEESPFNNQMRLLLVK                                 | 1 |
|                                                                                                                                                           |      |       |       |      |   |    | 3 | YDGEMLNRYRQALETAVNLSVK                           | 1 |
|                                                                                                                                                           |      |       |       |      |   |    | 3 | HHELILQRLQH GK                                   | 1 |
|                                                                                                                                                           |      |       |       |      |   |    | 3 | TC[339]DADASGTFR                                 | 1 |
|                                                                                                                                                           |      |       |       |      |   |    | 3 | PHGHVSAHPDILSLENRC[339]LATLPSLK                  | 1 |
|                                                                                                                                                           |      |       |       |      |   |    | 3 | SVTEM[147]EVM[147]QFLNRNQRLQPSAQALIYFR           | 1 |
| TESK2_HUMAN (Q96S53) Dual specificity testis-specific protein kinase 2 (EC 2.7.12.1) (Testicular protein kinase 2) [MASS=63639]                           | *    | 7.71  | *     | *    | * | 3  | 3 | LAVVGSPPFWM[147]APEVLR                           | 1 |
|                                                                                                                                                           |      |       |       |      |   |    | 2 | M[147]NTLSSNRANMLKEVQLM[147]NR                   | 1 |
|                                                                                                                                                           |      |       |       |      |   |    | 2 | MNTLSSNR                                         | 1 |
| TEX15_HUMAN (Q9BXT5) Testis-expressed sequence 15 protein [MASS=315360]                                                                                   | *    | 1.47  | *     | *    | * | 2  | 3 | DLNNEPISPIGLEEDTIIASRK                           | 1 |
|                                                                                                                                                           |      |       |       |      |   |    | 3 | SYGENIVELSSSDSLLLLR                              | 1 |
| TEX9_HUMAN (Q8N6V9) Testis-expressed sequence 9 protein [MASS=44826]                                                                                      | *    | 9.46  | *     | *    | * | 3  | 3 | QAASSQSATEVRLNR                                  | 1 |
|                                                                                                                                                           |      |       |       |      |   |    | 3 | QQRTINMQSQVEK                                    | 1 |
|                                                                                                                                                           |      |       |       |      |   |    | 1 | GELM[147]IGFK                                    | 2 |
| TFF3_HUMAN (Q07654) Trefoil factor 3 precursor (Intestinal trefoil factor) (hP1.B) [MASS=8641]                                                            | 0.00 | 41.25 | 3.62  | 0.00 | 1 | 1  | 3 | ALC[339]M[147]LGLVLALLSSSSAEEYVGLSANQC[339]AVPAK | 1 |
| TGT_HUMAN (Q9BXR0) Queuine tRNA-ribosyltransferase (EC 2.4.2.29) (tRNA-guanine transglycosylase) (Guanine insertion enzyme) [MASS=42492]                  | 0.00 | 3.36  | 13.58 | 0.00 | 1 | 1  | 3 | GITTEQLDALGC[339]R                               | 2 |
| THAP7_HUMAN (Q9BT49) THAP domain-containing protein 7 [MASS=34440]                                                                                        | *    | 6.15  | *     | *    | * | 1  | 3 | QTLKEHVQDFAM[147]QLSSSMA                         | 1 |
| THIL_HUMAN (P24752) Acetyl-CoA acetyltransferase, mitochondrial precursor (EC 2.3.1.9) (Acetoacetyl-CoA thiolase) (T2) [MASS=45199]                       | 1.00 | 2.81  | 1.18  | 0.04 | 4 | 1  | 2 | IHMGC[339]AENTAK                                 | 1 |
|                                                                                                                                                           |      |       |       |      |   |    | 2 | IHM[147]GSC[339]AENTAK                           | 1 |
|                                                                                                                                                           |      |       |       |      |   |    | 2 | IHMGC[330]AENTAK                                 | 1 |
|                                                                                                                                                           |      |       |       |      |   |    | 2 | IHM[147]GSC[330]AENTAK                           | 1 |

|                                                                                                                                                                                                                   |      |       |      |      |   |   |   |                                             |   |
|-------------------------------------------------------------------------------------------------------------------------------------------------------------------------------------------------------------------|------|-------|------|------|---|---|---|---------------------------------------------|---|
| THIM_HUMAN (P42765) 3-ketoacyl-CoA thiolase, mitochondrial (EC 2.3.1.16) (Beta-ketothiolase) (Acetyl-CoA acyltransferase) (Mitochondrial 3-oxoacyl-CoA thiolase) (T1) [MASS=41924]                                | 0.72 | 14.36 | 1.48 | 0.00 | 1 | 3 | 3 | PQTTLQLQKLPPVFK                             | 1 |
|                                                                                                                                                                                                                   |      |       |      |      |   |   | 2 | EEC[339]DKYALQSQQR                          | 1 |
|                                                                                                                                                                                                                   |      |       |      |      |   |   | 3 | EAEVLLC[330]GGTESMSQAPYC[330]VRNVRFGTK      | 1 |
| THRB_HUMAN (P00734) Prothrombin precursor (EC 3.4.21.5) (Coagulation factor II) [Contains: Activation peptide fragment 1; Activation peptide fragment 2; Thrombin light chain; Thrombin heavy chain] [MASS=70036] | 0.00 | 3.70  | 1.57 | 0.00 | 1 | 1 | 3 | YPHKPEINSTTHPGADLQENFC[339]R                | 1 |
| THY1_HUMAN (P04216) Thy-1 membrane glycoprotein precursor (Thy-1 antigen) (CD90 antigen) (CDw90 antigen) [MASS=17935]                                                                                             | 0.99 | 8.70  | 0.38 | 0.08 | 4 | 1 | 2 | VTSLTAC[330]LVDQSLR                         | 4 |
| TIM10_HUMAN (P62072) Mitochondrial import inner membrane translocase subunit Tim10 [MASS=10333]                                                                                                                   | 1.00 | 60.00 | 1.61 | 0.00 | 2 | 4 | 2 | M[147]TSAC[330]HR                           | 1 |
|                                                                                                                                                                                                                   |      |       |      |      |   |   | 2 | C[339]VPPHYK                                | 1 |
|                                                                                                                                                                                                                   |      |       |      |      |   |   | 3 | AQQLAAELEVEMMADM[147]YNRMTSAC[330]HRK       | 1 |
|                                                                                                                                                                                                                   |      |       |      |      |   |   | 2 | LTELSMQDEELMK                               | 1 |
|                                                                                                                                                                                                                   |      |       |      |      |   |   | 2 | C[330]VPPHYK                                | 1 |
| TIM13_HUMAN (Q9Y5L4) Mitochondrial import inner membrane translocase subunit Tim13 [MASS=10500]                                                                                                                   | 1.00 | 15.79 | 0.84 | 0.01 | 2 | 1 | 2 | C[330]IGKPGGSLDNSEQK                        | 1 |
|                                                                                                                                                                                                                   |      |       |      |      |   |   | 2 | C[339]IGKPGGSLDNSEQK                        | 1 |
| TIM9_HUMAN (Q9Y5J7) Mitochondrial import inner membrane translocase subunit Tim9 [MASS=10378]                                                                                                                     | 0.75 | 30.34 | 1.15 | 0.00 | 1 | 2 | 2 | QFKEFLGTYNK                                 | 1 |
|                                                                                                                                                                                                                   |      |       |      |      |   |   | 3 | EVKPEETTC[330]SEHC[330]LQK                  | 1 |
|                                                                                                                                                                                                                   |      |       |      |      |   |   | 3 | EVKPEETTC[339]SEHC[339]LQK                  | 1 |
| TKT_HUMAN (P29401) Transketolase (EC 2.2.1.1) (TK) [MASS=67877]                                                                                                                                                   | 0.00 | 6.26  | 1.13 | 0.00 | 1 | 2 | 2 | IIALDGDTKNSTFSEIFK                          | 1 |
|                                                                                                                                                                                                                   |      |       |      |      |   |   | 3 | FIEC[339]YIAEQNMVSIIVGC[339]ATR             | 1 |
| TLN2_HUMAN (Q9Y4G6) Talin-2 [MASS=271553]                                                                                                                                                                         | *    | 3.34  | *    | *    | * | 3 | 3 | SASAAQRELVAQGKVGSIIPANAADDGQWSQGLISAAR      | 1 |
|                                                                                                                                                                                                                   |      |       |      |      |   |   | 2 | DPPTWSVLAGHSHTVSDSIKSLITSIR                 | 1 |
|                                                                                                                                                                                                                   |      |       |      |      |   |   | 3 | GVKLLAALM[147]DDEVGSGEDLLR                  | 2 |
| TLR5_HUMAN (O60602) Toll-like receptor 5 precursor (Toll/interleukin-1 receptor-like protein 3) [MASS=97725]                                                                                                      | *    | 3.38  | *    | *    | * | 1 | 3 | MGDHLDLLLGVVLMAGPVFGIPSC[330]SFDGR          | 1 |
| TMED9_HUMAN (Q9BVK6) Transmembrane emp24 domain-containing protein 9 precursor (Glycoprotein 25L2) [MASS=25105]                                                                                                   | *    | 11.21 | *    | *    | * | 1 | 3 | KC[339]FIEEIPDETMVIGNYRTQLYDK               | 1 |
| TMEM8_HUMAN (Q9HCN3) Transmembrane protein 8 precursor (M83 protein) [MASS=84716]                                                                                                                                 | *    | 3.63  | *    | *    | * | 1 | 3 | RGMWNMLGPC[330]LFAFVIM[147]ASMWAYRC[339]GHR | 1 |

|                                                                                                                                                                                                                                                            |      |       |      |      |   |   |   |                                         |   |
|------------------------------------------------------------------------------------------------------------------------------------------------------------------------------------------------------------------------------------------------------------|------|-------|------|------|---|---|---|-----------------------------------------|---|
| TMM27_HUMAN (Q9HBJ8) Collectrin precursor (Transmembrane protein 27) [MASS=25235]                                                                                                                                                                          | *    | 4.05  | *    | *    | * | 1 | 2 | AMVAFSMRK                               | 1 |
| TMPS9_HUMAN (Q7Z410) Transmembrane protease, serine 9 (EC 3.4.21.-) (Polyserase-1) (Polyserase-I) (Polyserine protease 1) [Contains: Serase-1; Serase-2; Serase-3] [MASS=114020]                                                                           | 0.00 | 2.46  | 1.17 | 0.00 | 1 | 2 | 2 | RPGVYAR                                 | 1 |
|                                                                                                                                                                                                                                                            |      |       |      |      |   |   | 3 | LVRPIC[339]LPEPAPRPPDGTR                | 1 |
| TNI3K_HUMAN (Q59H18) Serine/threonine-protein kinase TNNI3K (EC 2.7.11.1) (TNNI3-interacting kinase) (Cardiac ankyrin repeat kinase) [MASS=104178]                                                                                                         | *    | 2.78  | *    | *    | * | 1 | 2 | LVQFLLDNGADMNLVAC[330]DPSRSSGEK         | 1 |
| TNK1_HUMAN (Q13470) Non-receptor tyrosine-protein kinase TNK1 (EC 2.7.10.2) (CD38 negative kinase 1) [MASS=72499]                                                                                                                                          | *    | 4.95  | *    | *    | * | 1 | 3 | KIMEMELSVHGVTHQEC[339]QTALGATGGDVVSAIR  | 1 |
|                                                                                                                                                                                                                                                            |      |       |      |      |   |   | 3 | ADEM[147]YDKC[339]IDLEPDNATTYVHK        | 1 |
| TOM70_HUMAN (O94826) Mitochondrial precursor proteins import receptor (Translocase of outer membrane TOM70) [MASS=67454]                                                                                                                                   | 1.00 | 16.12 | 0.92 | 0.09 | 5 | 5 | 3 | SEM[147]JEM[147]AHLVSLC[339]DAAHAQTEVAK | 1 |
|                                                                                                                                                                                                                                                            |      |       |      |      |   |   | 2 | C[330]AEGYALYAQALTDQQQFGK               | 1 |
|                                                                                                                                                                                                                                                            |      |       |      |      |   |   | 3 | ILLDQVEEAVADFDEC[339]JIR                | 1 |
|                                                                                                                                                                                                                                                            |      |       |      |      |   |   | 2 | C[330]IDLEPDNATTYVHK                    | 1 |
|                                                                                                                                                                                                                                                            |      |       |      |      |   |   | 3 | ILLDQVEEAVADFDEC[330]JIR                | 1 |
| TPA_HUMAN (P00750) Tissue-type plasminogen activator precursor (EC 3.4.21.68) (tPA) (t-PA) (t-plasminogen activator) (Alteplase) (Reteplase) [Contains: Tissue-type plasminogen activator chain A; Tissue-type plasminogen activator chain B] [MASS=62917] | *    | 1.96  | *    | *    | * | 1 | 3 | RGARSYQVIC[339]JR                       | 2 |
| TPIS_HUMAN (P60174) Triosephosphate isomerase (EC 5.3.1.1) (TIM) (Triose-phosphate isomerase) [MASS=26538]                                                                                                                                                 | 1.00 | 19.35 | 0.59 | 0.06 | 3 | 3 | 1 | IAVAAQNC[330]YK                         | 1 |
|                                                                                                                                                                                                                                                            |      |       |      |      |   |   | 2 | VAHALAEGLGVIAC[330]IGEK                 | 1 |
|                                                                                                                                                                                                                                                            |      |       |      |      |   |   | 2 | VPADTEVVC[330]APPTAYIDFAR               | 1 |
| TR4_HUMAN (P49116) Orphan nuclear receptor TR4 (Orphan nuclear receptor TAK1) [MASS=65414]                                                                                                                                                                 | *    | 6.54  | *    | *    | * | 2 | 2 | LLGKTDVQR                               | 3 |
|                                                                                                                                                                                                                                                            |      |       |      |      |   |   | 3 | QLIFTTSDNLVPGRIQIVTDSASVERLLGK          | 1 |
| TRABD_HUMAN (Q9UGI0) Protein TRABID (Zinc finger Ran-binding domain-containing protein 1) [MASS=80907]                                                                                                                                                     | *    | 3.39  | *    | *    | * | 1 | 3 | KLLHVHFLSAQELGNEEQEKLLR                 | 1 |

|                                                                                                                                                                                                                                                                              |      |       |      |      |   |   |                                                                                                                                                                              |                          |   |
|------------------------------------------------------------------------------------------------------------------------------------------------------------------------------------------------------------------------------------------------------------------------------|------|-------|------|------|---|---|------------------------------------------------------------------------------------------------------------------------------------------------------------------------------|--------------------------|---|
| TRFR_HUMAN (P34981) Thyrotropin-releasing hormone receptor (TRH-R) (Thyroliberin receptor) [MASS=45085]                                                                                                                                                                      | *    | 5.03  | *    | *    | * | 1 | 3                                                                                                                                                                            | IC[339]IYLNAINPVIYNLMSQK | 1 |
| TRI18_HUMAN (O15344) Midline-1 (EC 6.3.2.-) (Tripartite motif-containing protein 18) (Putative transcription factor XPRF) (Midin) (RING finger protein 59) (Midline 1 RING finger protein) [MASS=75250]                                                                      | 0.28 | 8.85  | 1.74 | 0.00 | 1 | 3 | 3 LAQQIANC[339]KQC[339]IER<br>3 C[339]LTIITGLPIPDHLDLC[330]TEQLP<br>3 ILVSHC[339]ATNESVESITAFQC[339]PTC[339]R                                                                | 1<br>1<br>1              |   |
| TRI32_HUMAN (Q13049) Tripartite motif-containing protein 32 (EC 6.3.2.-) (Zinc-finger protein HT2A) (72 kDa Tat-interacting protein) [MASS=71988]                                                                                                                            | 0.00 | 3.52  | 0.92 | 0.00 | 1 | 1 | 2 FVTC[339]DAEGTVYFTQGLGLNLENR                                                                                                                                               | 1                        |   |
| TRIM4_HUMAN (Q9C037) Tripartite motif-containing protein 4 (RING finger protein 87) [MASS=57400]                                                                                                                                                                             | *    | 13.20 | *    | *    | * | 3 | 2 RFQVAVNLAEDTAHPKLVFSQEGR<br>2 TAFVERFQHLPC[330]VLGKNVFTSGK<br>2 HYWEVESRDSLEVAVGVC[339]R                                                                                   | 1<br>1<br>1              |   |
| TRIO_HUMAN (O75962) Triple functional domain protein (PTRPF-interacting protein) [MASS=341614]                                                                                                                                                                               | *    | 1.32  | *    | *    | * | 2 | 2 MFDWITHNK<br>3 TPHNSSINHIEVTLQQLDEAQSQM[147]EELFQER                                                                                                                        | 1<br>1                   |   |
| TRPM7_HUMAN (Q96QT4) Transient receptor potential cation channel subfamily M member 7 (EC 2.7.11.1) (Long transient receptor potential channel 7) (LTrpC7) (Channel-kinase 1) [MASS=212696]                                                                                  | *    | 5.15  | *    | *    | * | 4 | 3 DEIVDIDDPETKRFPPYPLNELLIWAC[339]LMK<br>3 RQVMARFLWQHGEESM[147]AK<br>3 YVRLSYDTKPEVILQLLLK<br>3 KHGVVNTLSSSLPQGDLESNNPFHC[339]NILM[147]K                                    | 1<br>1<br>1<br>1         |   |
| TRPV4_HUMAN (Q9HBA0) Transient receptor potential cation channel subfamily V member 4 (TrpV4) (osm-9-like TRP channel 4) (OTRPC4) (Vanilloid receptor-like channel 2) (Vanilloid receptor-like protein 2) (VRL-2) (Vanilloid receptor-related osmotically-acti) [MASS=98281] | 0.00 | 1.26  | 0.88 | 0.00 | 1 | 1 | 2 MYDLLLLKC[339]AR                                                                                                                                                           | 1                        |   |
| TRXR2_HUMAN (Q9NNW7) Thioredoxin reductase 2, mitochondrial precursor (EC 1.8.1.9) (TR3) (TR-beta) (Selenoprotein Z) (SelZ) [MASS=56459]                                                                                                                                     | *    | 5.53  | *    | *    | * | 1 | 3 GFDQQMSSMVEIHM[147]ASHGTRFLRGC[339]APSR                                                                                                                                    | 1                        |   |
| TSC2_HUMAN (P49815) Tuberin (Tuberous sclerosis 2 protein) [MASS=200748]                                                                                                                                                                                                     | *    | 6.42  | *    | *    | * | 5 | 3 EMVYC[330]LEQGLIHRC[330]AR<br>2 TDLHLAVVPVLTALISYHNYLDKTK<br>3 NLLGTHLGHSAIYNM[147]C[330]HLMEDRAYMEDAPLLR<br>2 ADVGRLSPEVKAR<br>3 AYM[147]EDAPLLRGAVFFVGM[147]ALWGAHRLYSLR | 1<br>1<br>1<br>1<br>1    |   |

|                                                                                                                                                                                                                          |      |       |      |      |   |   |   |                                            |   |
|--------------------------------------------------------------------------------------------------------------------------------------------------------------------------------------------------------------------------|------|-------|------|------|---|---|---|--------------------------------------------|---|
| TSH1_HUMAN (Q6ZSZ6) Teashirt homolog 1 (Serologically defined colon cancer antigen 3) (Antigen NY-CO-33) [MASS=117916]                                                                                                   | 0.00 | 4.64  | 1.00 | 0.00 | 1 | 2 | 2 | PLPAAVQSVQVQPSYAGGVK                       | 1 |
|                                                                                                                                                                                                                          |      |       |      |      |   |   | 3 | ALQDLAPPC[339]SPEPAGM[147]AAEVALSESAKDQK   | 1 |
| TSH3_HUMAN (Q63HK5) Teashirt homolog 3 (Zinc finger protein 537) [MASS=118565]                                                                                                                                           | *    | 1.67  | *    | *    | * | 1 | 2 | DLSKLSTEQINSQIAQTK                         | 1 |
| TSN18_HUMAN (Q96SJ8) Tetraspanin-18 (Tspan-18) [MASS=27710]                                                                                                                                                              | 0.00 | 4.03  | 0.85 | 0.00 | 1 | 1 | 2 | MEGDC[330]LSC[330]MK                       | 1 |
| TSP2_HUMAN (P35442) Thrombospondin-2 precursor [MASS=129955]                                                                                                                                                             | *    | 1.37  | *    | *    | * | 1 | 2 | LGPVHTTEYVGPSSER                           | 1 |
| TSSP_HUMAN (Q9NQE7) Thymus-specific serine protease precursor (EC 3.4.-.-) [MASS=55049]                                                                                                                                  | 0.00 | 16.54 | 0.87 | 0.00 | 1 | 3 | 3 | SLM[147]STAIGGSLEC[330]RAAVSVAFAEVER       | 1 |
|                                                                                                                                                                                                                          |      |       |      |      |   |   | 3 | GHPAALAPAWGALVISLEHRFYGLSIPAGGLEM[147]AQLR | 1 |
|                                                                                                                                                                                                                          |      |       |      |      |   |   | 3 | FYGLSIPAGGLEM[147]AQLRFLSSR                | 1 |
|                                                                                                                                                                                                                          |      |       |      |      |   |   | 2 | LNSFGLDATGTFFSRYGASLK                      | 1 |
| TTC3_HUMAN (P53804) Tetratricopeptide repeat protein 3 (TPR repeat protein 3) (TPR repeat protein D) [MASS=229890]                                                                                                       | 0.00 | 4.84  | 0.06 | 0.00 | 1 | 6 | 3 | C[339]QFLDDRILQC[339]IKQYADK               | 1 |
|                                                                                                                                                                                                                          |      |       |      |      |   |   | 3 | TQSC[330]MDC[330]IEEGELM[147]KM[147]K      | 1 |
|                                                                                                                                                                                                                          |      |       |      |      |   |   | 2 | FVVIDNC[330]IALK                           | 1 |
|                                                                                                                                                                                                                          |      |       |      |      |   |   | 2 | LQIM[147]ESQAEFLKK                         | 1 |
|                                                                                                                                                                                                                          |      |       |      |      |   |   | 2 | SSRAHQDFANIMKM[147]LR                      | 1 |
|                                                                                                                                                                                                                          |      |       |      |      |   |   | 3 | GGLDAPDC[330]LPYDSLSTSR                    | 1 |
| TTL2_HUMAN (Q9BWV7) Tubulin--tyrosine ligase-like protein 2 (Testis-specific protein NYD-TSPG) [MASS=67237]                                                                                                              | 0.00 | 11.15 | 0.55 | 0.00 | 1 | 3 | 3 | GKAPDPQAGNFVLVFPFNEATLGASRNGLNVK           | 1 |
|                                                                                                                                                                                                                          |      |       |      |      |   |   | 2 | TLM[147]PYASLFQSHSC[330]K                  | 1 |
| TXND3_HUMAN (Q8N427) Thioredoxin domain-containing protein 3 (Spermatid-specific thioredoxin-2) (Sptrx-2) (NM23-H8) [MASS=67269]                                                                                         | *    | 7.65  | *    | *    | * | 2 | 3 | DFYKDLLEMLSVGPSM[147]VM[147]ILTK           | 1 |
|                                                                                                                                                                                                                          |      |       |      |      |   |   | 3 | KREVQLQTVINQSLWDEMLQNK                     | 1 |
| TXND4_HUMAN (Q9BS26) Thioredoxin domain-containing protein 4 precursor (Endoplasmic reticulum resident protein ERp44) [MASS=46971]                                                                                       | 0.98 | 2.96  | 1.30 | 0.00 | 1 | 1 | 2 | VDC[339]DQHSDIAQR                          | 1 |
| TYRO3_HUMAN (Q06418) Tyrosine-protein kinase receptor TYRO3 precursor (EC 2.7.10.1) (Tyrosine-protein kinase RSE) (Tyrosine-protein kinase SKY) (Tyrosine-protein kinase DTK) (Protein-tyrosine kinase byk) [MASS=96905] | 0.00 | 5.51  | 2.11 | 0.00 | 1 | 2 | 3 | M[147]LKADIIASSDIEEFLREAAAC[339]M[147]K    | 1 |
|                                                                                                                                                                                                                          |      |       |      |      |   |   | 2 | TSWVPVVLGVLTAALALILLR                      | 1 |



|                                                                                                                                                                                                                                |      |      |      |      |   |   |                                                                                                                                         |                  |   |
|--------------------------------------------------------------------------------------------------------------------------------------------------------------------------------------------------------------------------------|------|------|------|------|---|---|-----------------------------------------------------------------------------------------------------------------------------------------|------------------|---|
| U3IP2_HUMAN (O43818) U3 small nucleolar RNA-interacting protein 2 (U3 small nucleolar ribonucleoprotein-associated 55 kDa protein) (U3 snoRNP-associated 55 kDa protein) (U3-55K) [MASS=51840]                                 | *    | 1.68 | *    | *    | * | 1 | 1                                                                                                                                       | GKSKGGGK         | 1 |
| UBE1_HUMAN (P22314) Ubiquitin-activating enzyme E1 (A1S9 protein) [MASS=117848]                                                                                                                                                | 0.99 | 3.31 | 1.30 | 0.00 | 1 | 2 | 2 YFLVGAGAIGC[339]ELLK<br>3 LGKQKYFLVGAGAIGC[339]ELLK                                                                                   | 1<br>1           |   |
| UBE3C_HUMAN (Q15386) Ubiquitin-protein ligase E3C (EC 6.3.2.-) [MASS=123922]                                                                                                                                                   | 0.00 | 2.03 | 1.47 | 0.00 | 1 | 1 | 2 ILLENVLKPLHFTYNESC[339]PEGAR                                                                                                          | 1                |   |
| UBE4B_HUMAN (O95155) Ubiquitin conjugation factor E4 B (Ubiquitin-fusion degradation protein 2) (Homozygously deleted in neuroblastoma 1) [MASS=146184]                                                                        | 0.00 | 5.68 | 2.44 | 0.00 | 1 | 4 | 2 SM[147]SQVDVDSGIENMEVDENDR<br>2 EC[339]SLDSYFK<br>2 SLSDKEPSSGPEVSEEQALQLVC[330]K<br>2 IHEVQEEMKNKEQWDQLPR                            | 1<br>1<br>1<br>1 |   |
| UBP28_HUMAN (Q96RU2) Ubiquitin carboxyl-terminal hydrolase 28 (EC 3.1.2.15) (Ubiquitin thioesterase 28) (Ubiquitin-specific-processing protease 28) (Deubiquitinating enzyme 28) [MASS=122490]                                 | *    | 5.76 | *    | *    | * | 3 | 2 SGVEAALSEVMLSPAMQGVILAIK<br>2 PLTSSRSM[147]EM[147]PSQPAPR<br>2 ASNGDITQAVSLLTDERVK                                                    | 1<br>1<br>1      |   |
| UBP38_HUMAN (Q8NB14) Ubiquitin carboxyl-terminal hydrolase 38 (EC 3.1.2.15) (Ubiquitin thioesterase 38) (Ubiquitin-specific-processing protease 38) (Deubiquitinating enzyme 38) (HP43.8KD) [MASS=116545]                      | *    | 2.98 | *    | *    | * | 2 | 2 PEFESFFNK<br>2 ELM[147]DAITKDNKLYLQEQLNAR                                                                                             | 1<br>1           |   |
| UBP4_HUMAN (Q13107) Ubiquitin carboxyl-terminal hydrolase 4 (EC 3.1.2.15) (Ubiquitin thioesterase 4) (Ubiquitin-specific-processing protease 4) (Deubiquitinating enzyme 4) (Ubiquitous nuclear protein homolog) [MASS=108564] | *    | 4.47 | *    | *    | * | 2 | 2 LC[339]ENSDPTNVLSC[330]HFSKADTIATIEK<br>2 KDRVM[147]JEVFLVPADPHC[339]R                                                                | 1<br>1           |   |
| UBP5_HUMAN (P45974) Ubiquitin carboxyl-terminal hydrolase 5 (EC 3.1.2.15) (Ubiquitin thioesterase 5) (Ubiquitin-specific-processing protease 5) (Deubiquitinating enzyme 5) (Isopeptidase T) [MASS=95786]                      | 1.00 | 6.88 | 0.73 | 0.04 | 2 | 3 | 3 LGHGLLSGEYSKVPESGDGER<br>2 QAEEEEKM[147]ALPELVR<br>2 NLGNESC[330]YLN SVVQVLF S I P D F Q R<br>3 NLGNESC[339]YLN SVVQVLF S I P D F Q R | 1<br>1<br>1<br>1 |   |

|                                                                                                                                                                                                                  |      |       |      |      |    |   |                       |                                                                                                                                                                           |                            |
|------------------------------------------------------------------------------------------------------------------------------------------------------------------------------------------------------------------|------|-------|------|------|----|---|-----------------------|---------------------------------------------------------------------------------------------------------------------------------------------------------------------------|----------------------------|
| UBP6_HUMAN (P35125) Ubiquitin carboxyl-terminal hydrolase 6 (EC 3.1.2.15) (Ubiquitin thioesterase 6) (Ubiquitin-specific-processing protease 6) (Deubiquitinating enzyme 6) (Proto-oncogene TRE-2) [MASS=158657] | *    | 2.49  | *    | *    | *  | 2 | 3<br>2                | DPALC[339]QHKPLTPQGDELSPR<br>RSSEHIIHIDLVR                                                                                                                                | 1<br>1                     |
| UBR1_HUMAN (Q81WV7) Ubiquitin-protein ligase E3 component N-recognin-1 (EC 6.-.-.) (Ubiquitin-protein ligase E3-alpha-1) (Ubiquitin-protein ligase E3-alpha-I) [MASS=200209]                                     | *    | 4.12  | *    | *    | *  | 3 | 2<br>2<br>2           | M[147]QFLEGFRSFLKILTC[339]M[147]QGM[147]JEEIR<br>EKSC[339]LIVATTSGSESIKNDEITHDK<br>GIPQLEGQKDMITWILQMFDTVK                                                                | 1<br>1<br>1                |
| UBR2_HUMAN (Q81WV8) Ubiquitin-protein ligase E3 component N-recognin-2 (EC 6.-.-.) (Ubiquitin-protein ligase E3-alpha-2) (Ubiquitin-protein ligase E3-alpha-II) [MASS=200537]                                    | 0.00 | 3.36  | 1.09 | 0.00 | 1  | 3 | 2<br>2<br>3           | NSPSILAMLETLQNAPYLEVHK<br>YC[330]VSQEK<br>REMFDKDVVM[147]LQTGVSM[147]DPNHFLM[147]IMLSR                                                                                    | 1<br>1<br>1                |
|                                                                                                                                                                                                                  |      |       |      |      |    |   | 2<br>1<br>2           | C[330]FEKNEAIQAAHDAVAQEGQC[330]R<br>FSAVALC[339]K<br>NEAIQAAHDAVAQEGQC[330]R                                                                                              | 1<br>1<br>2                |
| UCHL1_HUMAN (P09936) Ubiquitin carboxyl-terminal hydrolase isozyme L1 (EC 3.4.19.12) (EC 6.-.-.) (UCH-L1) (Ubiquitin thioesterase L1) (Neuron cytoplasmic protein 9.5) (PGP 9.5) (PGP9.5) [MASS=24824]           | 1.00 | 45.74 | 0.53 | 0.49 | 11 | 5 | 2<br>3<br>3<br>2<br>1 | FSAVALC[330]K<br>QTIGNSC[330]GTIGLIHAVANNQDK<br>QTIGNSC[339]GTIGLIHAVANNQDKLGFEDGSVLK<br>C[330]FEKNEAIQAAHDAVAQEGQC[330]R<br>QTIGNSC[339]GTIGLIHAVANNQDK<br>FSAVALC[330]K | 3<br>1<br>1<br>1<br>1<br>1 |
| UCP4_HUMAN (O95847) Mitochondrial uncoupling protein 4 (UCP 4) (Solute carrier family 25 member 27) [MASS=36064]                                                                                                 | 0.98 | 12.07 | 1.46 | 0.00 | 1  | 2 | 3<br>2                | FLLSGC[339]AATVAELATFPLDLTK<br>GMVRTALGIIEEGFLK                                                                                                                           | 1<br>1                     |

|                                                                                                                                                                                                                                  |      |       |      |      |    |   |   |                                            |   |
|----------------------------------------------------------------------------------------------------------------------------------------------------------------------------------------------------------------------------------|------|-------|------|------|----|---|---|--------------------------------------------|---|
|                                                                                                                                                                                                                                  |      |       |      |      |    |   | 2 | EQC[330]EQLEK                              | 3 |
|                                                                                                                                                                                                                                  |      |       |      |      |    |   | 2 | SHTEEDC[339]TEELDFDLHAR                    | 1 |
|                                                                                                                                                                                                                                  |      |       |      |      |    |   | 2 | SHTEEDC[330]TEELDFDLHAR                    | 1 |
|                                                                                                                                                                                                                                  |      |       |      |      |    |   | 2 | EQC[339]EQLEK                              | 3 |
| UCRH_HUMAN (P07919) Ubiquinol-cytochrome c reductase complex 11 kDa protein, mitochondrial precursor (EC 1.10.2.2) (Mitochondrial hinge protein) (Cytochrome C1, nonheme 11 kDa protein) (Complex III subunit VIII) [MASS=10739] | 1.00 | 46.15 | 1.19 | 0.06 | 16 | 4 | 2 | ERLELC[330]DER                             | 1 |
|                                                                                                                                                                                                                                  |      |       |      |      |    |   | 2 | DHC[330]VAHK                               | 2 |
|                                                                                                                                                                                                                                  |      |       |      |      |    |   | 1 | DHC[330]VAHK                               | 2 |
|                                                                                                                                                                                                                                  |      |       |      |      |    |   | 2 | ERLELC[339]DER                             | 1 |
|                                                                                                                                                                                                                                  |      |       |      |      |    |   | 2 | DHC[339]VAHK                               | 2 |
|                                                                                                                                                                                                                                  |      |       |      |      |    |   | 3 | ERLELC[339]DER                             | 1 |
|                                                                                                                                                                                                                                  |      |       |      |      |    |   | 3 | SHTEEDC[330]TEELDFDLHAR                    | 2 |
| UCRQ_HUMAN (O14949) Ubiquinol-cytochrome c reductase complex ubiquinone-binding protein QP-C (EC 1.10.2.2) (Ubiquinol-cytochrome c reductase complex 9.5 kDa protein) (Complex III subunit VII) [MASS=9775]                      | *    | 9.88  | *    | *    | *  | 1 | 2 | RIRESFFR                                   | 1 |
| UGGG1_HUMAN (Q9NYU2) UDP-glucose:glycoprotein glucosyltransferase 1 precursor (EC 2.4.1.-) (UDP-glucose ceramide glucosyltransferase-like 1) (UDP--Glc:glycoprotein glucosyltransferase) (HUGT1) [MASS=174976]                   | *    | 4.25  | *    | *    | *  | 4 | 3 | YNSWPSSLQELLR                              | 1 |
|                                                                                                                                                                                                                                  |      |       |      |      |    |   | 2 | FTILDSQGKTAAVANSM[147]NYLTK                | 1 |
|                                                                                                                                                                                                                                  |      |       |      |      |    |   | 2 | ILASPVELALVVMKDLSQNFPTK                    | 1 |
|                                                                                                                                                                                                                                  |      |       |      |      |    |   | 1 | TSGQKIK                                    | 1 |
| ULK1_HUMAN (O75385) Serine/threonine-protein kinase ULK1 (EC 2.7.11.1) (Unc-51-like kinase 1) [MASS=112601]                                                                                                                      | *    | 6.19  | *    | *    | *  | 3 | 3 | LIFSHAVQM[147]VQSAALDEMFAQHREGC[339]VPRYHK | 1 |
|                                                                                                                                                                                                                                  |      |       |      |      |    |   | 3 | KDLIGHGAFVAVFKGR                           | 1 |
|                                                                                                                                                                                                                                  |      |       |      |      |    |   | 2 | LNELYKASVVSVC[330]QGLSLR                   | 1 |
| UN13C_HUMAN (Q8NB66) Unc-13 homolog C (Munc13-3) (Fragment) [MASS=135621]                                                                                                                                                        | *    | 4.62  | *    | *    | *  | 3 | 3 | QC[339]AIM[147]EVVLATIKQYFHAGGNLKK         | 1 |
|                                                                                                                                                                                                                                  |      |       |      |      |    |   | 3 | YGIESIQAM[147]THFSC[339]LSSK               | 1 |
|                                                                                                                                                                                                                                  |      |       |      |      |    |   | 2 | C[330]LEC[330]GVKC[339]HEK                 | 1 |
|                                                                                                                                                                                                                                  |      |       |      |      |    |   | 3 | NHSRTFPHGNNHSFSTM[147]HPRNK                | 2 |
| UNC5D_HUMAN (Q6UXZ4) Netrin receptor UNC5D precursor (Unc-5 homolog D) (Unc-5 homolog 4) [MASS=105879]                                                                                                                           | 0.00 | 7.97  | 0.16 | 0.00 | 1  | 4 | 2 | QGNSLLNSAMQPDLTVSR                         | 1 |
|                                                                                                                                                                                                                                  |      |       |      |      |    |   | 2 | IC[330]ATFDTPNAK                           | 1 |
|                                                                                                                                                                                                                                  |      |       |      |      |    |   | 3 | LLHFKGNTFSLQISVLDIPPFLWR                   | 1 |

|                                                                                                                                                                                                                                   |      |       |      |      |    |   |   |                                            |   |
|-----------------------------------------------------------------------------------------------------------------------------------------------------------------------------------------------------------------------------------|------|-------|------|------|----|---|---|--------------------------------------------|---|
| UQCR1_HUMAN (P31930) Ubiquinol-cytochrome-c reductase complex core protein I, mitochondrial precursor (EC 1.10.2.2) [MASS=52645]                                                                                                  | 1.00 | 22.71 | 1.05 | 0.06 | 13 | 6 | 3 | NALVSHLDGTTTPVC[339]EDIGR                  | 1 |
|                                                                                                                                                                                                                                   |      |       |      |      |    |   | 2 | NALVSHLDGTTTPVC[339]EDIGR                  | 1 |
|                                                                                                                                                                                                                                   |      |       |      |      |    |   | 3 | AVELLGDIVQNC[339]SLEDSQIEKER               | 2 |
|                                                                                                                                                                                                                                   |      |       |      |      |    |   | 3 | LC[339]QSFQTF SIC[339]YAETGLLGAHFVC[339]DR | 1 |
|                                                                                                                                                                                                                                   |      |       |      |      |    |   | 1 | GKNILR                                     | 1 |
|                                                                                                                                                                                                                                   |      |       |      |      |    |   | 2 | LC[339]TSATESEVAR                          | 2 |
| UQCR2_HUMAN (P22695) Ubiquinol-cytochrome-c reductase complex core protein 2, mitochondrial precursor (EC 1.10.2.2) (Complex III subunit II) [MASS=48443]                                                                         | 1.00 | 2.87  | 1.11 | 0.04 | 5  | 1 | 2 | NALANPLYC[330]PDYR                         | 2 |
|                                                                                                                                                                                                                                   |      |       |      |      |    |   | 2 | NALANPLYC[339]PDYR                         | 3 |
|                                                                                                                                                                                                                                   |      |       |      |      |    |   | 2 | NALVSHLDGTTTPVC[330]EDIGR                  | 1 |
|                                                                                                                                                                                                                                   |      |       |      |      |    |   | 3 | YIYDQC[330]PAVAGYGPIEQLPDYNR               | 1 |
|                                                                                                                                                                                                                                   |      |       |      |      |    |   | 2 | AVELLGDIVQNC[330]SLEDSQIEKER               | 1 |
|                                                                                                                                                                                                                                   |      |       |      |      |    |   | 3 | LC[330]QSFQTF SIC[330]YAETGLLGAHFVC[330]DR | 2 |
| VA0D_HUMAN (P61421) Vacuolar ATP synthase subunit d (EC 3.6.3.14) (V-ATPase d subunit) (Vacuolar proton pump d subunit) (V-ATPase AC39 subunit) (V-ATPase 40 kDa accessory protein) (P39) (32 kDa accessory protein) [MASS=40329] | 1.00 | 1.99  | 0.81 | 0.20 | 3  | 1 | 2 | LFPHC[339]GR                               | 1 |
|                                                                                                                                                                                                                                   |      |       |      |      |    |   | 2 | LFPHC[330]GR                               | 2 |
| VAPA_HUMAN (Q9P0L0) Vesicle-associated membrane protein-associated protein A (VAMP-associated protein A) (VAMP-A) (VAP-A) (33 kDa Vamp-associated protein) (VAP-33) [MASS=27317]                                                  | *    | 9.50  | *    | *    | *  | 1 | 2 | FM[147]VQTIFAPPNTSDMEAVWKEAK               | 1 |
| VATA1_HUMAN (P38606) Vacuolar ATP synthase catalytic subunit A, ubiquitous isoform (EC 3.6.3.14) (V-ATPase subunit A 1) (Vacuolar proton pump alpha subunit 1) (V-ATPase 69 kDa subunit 1) (Isoform VA68) [MASS=68304]            | 1.00 | 4.86  | 0.24 | 2.63 | 4  | 2 | 3 | FC[330]PFYKTVGMLSNMIAFYDMARR               | 3 |
|                                                                                                                                                                                                                                   |      |       |      |      |    |   | 2 | C[339]LGNPER                               | 1 |
|                                                                                                                                                                                                                                   |      |       |      |      |    |   | 2 | C[330]LGNPER                               | 1 |
|                                                                                                                                                                                                                                   |      |       |      |      |    |   |   |                                            |   |

|                                                                                                                                                                                                                                              |      |       |      |      |    |   |   |                                       |   |
|----------------------------------------------------------------------------------------------------------------------------------------------------------------------------------------------------------------------------------------------|------|-------|------|------|----|---|---|---------------------------------------|---|
| VATB1_HUMAN (P15313) Vacuolar ATP synthase subunit B, kidney isoform (EC 3.6.3.14) (V-ATPase B1 subunit) (Vacuolar proton pump B isoform 1) (Endomembrane proton pump 58 kDa subunit) [MASS=56980]                                           | 0.00 | 3.90  | *    | *    | *  | 1 | 2 | IPIFSAAGLPHNEIAAQIC[330]R             | 1 |
| VATB2_HUMAN (P21281) Vacuolar ATP synthase subunit B, brain isoform (EC 3.6.3.14) (V-ATPase B2 subunit) (Vacuolar proton pump B isoform 2) (Endomembrane proton pump 58 kDa subunit) (HO57) [MASS=56500]                                     | 1.00 | 3.52  | 0.68 | 0.02 | 2  | 1 | 2 | KDHADVSNQLYAC[339]YAIGK               | 1 |
| VATH_HUMAN (Q9U112) Vacuolar ATP synthase subunit H (EC 3.6.3.14) (V-ATPase H subunit) (Vacuolar proton pump H subunit) (V-ATPase 50/57 kDa subunits) (Vacuolar proton pump subunit SFD) (VMA13) (Nef-binding protein 1) (NBP1) [MASS=55883] | *    | 4.55  | *    | *    | *  | 1 | 3 | VNWQSYLQGQMISAEDC[339]EFIQR           | 1 |
| VAV2_HUMAN (P52735) Protein vav-2 [MASS=101256]                                                                                                                                                                                              | *    | 12.41 | *    | *    | *  | 6 | 2 | YMQKMGM[147]TEDDKR                    | 1 |
|                                                                                                                                                                                                                                              |      |       |      |      |    |   | 2 | EIIELLFHKMTDDPM[147]NNK               | 1 |
|                                                                                                                                                                                                                                              |      |       |      |      |    |   | 3 | MFLRGTFYQGYM[147]C[330]TKC[330]GVGAHK | 1 |
|                                                                                                                                                                                                                                              |      |       |      |      |    |   | 3 | YLFLFDKVVIVC[330]K                    | 1 |
|                                                                                                                                                                                                                                              |      |       |      |      |    |   | 3 | MWSYGFYLIHLQGKQGFQFFC[330]K           | 1 |
|                                                                                                                                                                                                                                              |      |       |      |      |    |   | 2 | QQLKEALEAM[147]QDLAMYINEVK            | 1 |
| VCAM1_HUMAN (P19320) Vascular cell adhesion protein 1 precursor (V-CAM 1) (CD106 antigen) (INCAM-100) [MASS=81276]                                                                                                                           | 0.00 | 5.14  | 0.92 | 0.00 | 1  | 2 | 2 | GETILENIEFLEDTDMK                     | 1 |
|                                                                                                                                                                                                                                              |      |       |      |      |    |   | 2 | DPEIEM[147]SGGLVNGSSVTVSC[339]K       | 1 |
|                                                                                                                                                                                                                                              |      |       |      |      |    |   | 3 | DPEIEMSGGLVNGSSVTVSC[339]K            | 1 |
|                                                                                                                                                                                                                                              |      |       |      |      |    |   | 2 | YQIDPDAC[339]FSAK                     | 2 |
|                                                                                                                                                                                                                                              |      |       |      |      |    |   | 2 | EHINLGC[330]DM[147]DFDIAGPSIR         | 1 |
|                                                                                                                                                                                                                                              |      |       |      |      |    |   | 1 | YQIDPDAC[339]FSAK                     | 3 |
| VDAC1_HUMAN (P21796) Voltage-dependent anion-selective channel protein 1 (VDAC-1) (hVDAC1) (Outer mitochondrial membrane protein porin 1) (Plasmalemmal porin) (Porin 31HL) (Porin 31HM) [MASS=30641]                                        | 1.00 | 18.79 | 1.15 | 0.02 | 10 | 3 | 1 | YQIDPDAC[330]FSAK                     | 1 |
|                                                                                                                                                                                                                                              |      |       |      |      |    |   | 2 | YQIDPDAC[330]FSAK                     | 3 |
|                                                                                                                                                                                                                                              |      |       |      |      |    |   | 3 | WNTDNTLGTETVEDQLARGLK                 | 1 |

|                                                                                                                                                                                                                                                                             |      |       |      |      |   |   |   |                                       |   |
|-----------------------------------------------------------------------------------------------------------------------------------------------------------------------------------------------------------------------------------------------------------------------------|------|-------|------|------|---|---|---|---------------------------------------|---|
| VDAC2_HUMAN (P45880) Voltage-dependent anion-selective channel protein 2 (VDAC-2) (hVDAC2) (Outer mitochondrial membrane protein porin 2) [MASS=38092]                                                                                                                      | 1.00 | 14.99 | 1.03 | 0.08 | 7 | 3 | 2 | WNTDNTLGTEIAIEDQIC[330]QGLK           | 1 |
|                                                                                                                                                                                                                                                                             |      |       |      |      |   |   | 2 | WNTDNTLGTEIAIEDQIC[339]QGLK           | 1 |
|                                                                                                                                                                                                                                                                             |      |       |      |      |   |   | 2 | SC[330]SGVEFSTSGSSNTDTGK              | 1 |
|                                                                                                                                                                                                                                                                             |      |       |      |      |   |   | 2 | SC[339]SGVEFSTSGSSNTDTGK              | 1 |
|                                                                                                                                                                                                                                                                             |      |       |      |      |   |   | 2 | WC[339]EYGLTFTEK                      | 2 |
|                                                                                                                                                                                                                                                                             |      |       |      |      |   |   | 2 | WC[330]EYGLTFTEK                      | 1 |
|                                                                                                                                                                                                                                                                             |      |       |      |      |   |   |   |                                       |   |
| VDAC3_HUMAN (Q9Y277) Voltage-dependent anion-selective channel protein 3 (VDAC-3) (hVDAC3) (Outer mitochondrial membrane protein porin 3) [MASS=30658]                                                                                                                      | 1.00 | 3.89  | 1.22 | 0.04 | 3 | 1 | 2 | VC[339]NYGLTFTQK                      | 1 |
|                                                                                                                                                                                                                                                                             |      |       |      |      |   |   | 2 | VC[330]NYGLTFTQK                      | 2 |
| VDP_HUMAN (O60763) General vesicular transport factor p115 (Transcytosis-associated protein) (TAP) (Vesicle docking protein) [MASS=107907]                                                                                                                                  | *    | 3.22  | *    | *    | * | 1 | 3 | WPGVKLLTSLKQLGPVQQIILVSPM[147]GVSR    | 1 |
| VISL1_HUMAN (P62760) Visinin-like protein 1 (VILIP) (Hippocalcin-like protein 3) (HLP3) [MASS=22011]                                                                                                                                                                        | 0.68 | 17.37 | 0.75 | 0.00 | 1 | 2 | 2 | GFLKDC[330]PSGR                       | 1 |
|                                                                                                                                                                                                                                                                             |      |       |      |      |   |   | 3 | M[147]VGTVM[147]MKM[147]NEDGLTPEQRVDK | 1 |
| VP13B_HUMAN (Q7Z7G8) Vacuolar protein sorting 13B (Cohen syndrome protein 1) [MASS=448732]                                                                                                                                                                                  | *    | 1.72  | *    | *    | * | 4 | 3 | MIVC[339]ALEHEYEPYSRLK                | 1 |
|                                                                                                                                                                                                                                                                             |      |       |      |      |   |   | 3 | TSRHMQQQPVVAVPLVM[147]PVC[339]R       | 1 |
|                                                                                                                                                                                                                                                                             |      |       |      |      |   |   | 2 | VC[330]JELQLPDINLVNDQK                | 1 |
|                                                                                                                                                                                                                                                                             |      |       |      |      |   |   | 2 | DFLNGPADVNLDISK                       | 1 |
| VP33B_HUMAN (Q9H267) Vacuolar protein sorting 33B (hVPS33B) [MASS=70615]                                                                                                                                                                                                    | 0.00 | 5.67  | 0.89 | 0.00 | 1 | 2 | 2 | LLSLHIGAC[330]ESIM[147]K              | 1 |
|                                                                                                                                                                                                                                                                             |      |       |      |      |   |   | 2 | LM[147]C[339]LLSITENGLIPKDYRSLK       | 1 |
| VPP1_HUMAN (Q93050) Vacuolar proton translocating ATPase 116 kDa subunit a isoform 1 (V-ATPase 116 kDa isoform a1) (Clathrin-coated vesicle/synaptic vesicle proton pump 116 kDa subunit) (Vacuolar proton pump subunit 1) (Vacuolar adenosine triphosphatase) [MASS=96412] | 1.00 | 6.45  | 0.79 | 0.15 | 3 | 4 | 3 | ILSQKNENEMFSTVFSGR                    | 1 |
|                                                                                                                                                                                                                                                                             |      |       |      |      |   |   | 2 | ASLYPC[330]PETPQER                    | 1 |
|                                                                                                                                                                                                                                                                             |      |       |      |      |   |   | 2 | KIC[330]EGFR                          | 1 |
|                                                                                                                                                                                                                                                                             |      |       |      |      |   |   | 2 | AIYHTLNLC[330]NIDVTQK                 | 1 |
| VPS35_HUMAN (Q96QK1) Vacuolar protein sorting 35 (Vesicle protein sorting 35) (hVPS35) (Maternal-embryonic 3) [MASS=91706]                                                                                                                                                  | *    | 5.78  | *    | *    | * | 3 | 2 | FTLPPLVFAAYQLAFR                      | 1 |
|                                                                                                                                                                                                                                                                             |      |       |      |      |   |   | 2 | HFHNTLEHLRLRR                         | 2 |
| VPS4A_HUMAN (Q9UN37) Vacuolar sorting protein 4a (SKD2 protein) (hVPS4) (VPS4-1) [MASS=48898]                                                                                                                                                                               | *    | 9.84  | *    | *    | * | 3 | 3 | HASNM[147]LGELRTSMLSPK                | 1 |
|                                                                                                                                                                                                                                                                             |      |       |      |      |   |   | 2 | RIYIPLPEEAARAQM[147]FR                | 1 |
|                                                                                                                                                                                                                                                                             |      |       |      |      |   |   | 2 | FSEDFGQES                             | 1 |
|                                                                                                                                                                                                                                                                             |      |       |      |      |   |   | 2 | GILLFGPPGTGKSYLAK                     | 1 |

|                                                                                                                                           |      |       |      |      |   |   |   |                                                |   |
|-------------------------------------------------------------------------------------------------------------------------------------------|------|-------|------|------|---|---|---|------------------------------------------------|---|
| VPS54_HUMAN (Q9P1Q0) Vacuolar protein sorting protein 54 (Tumor antigen SLP-8p) (Hepatocellular carcinoma protein 8) [MASS=110588]        | *    | 2.66  | *    | *    | * | 2 | 1 | FLMSR                                          | 1 |
|                                                                                                                                           |      |       |      |      |   |   | 2 | EHTSSSAIPGGVDIM[147]VSEDMK                     | 1 |
| VTDB_HUMAN (P02774) Vitamin D-binding protein precursor (DBP) (Group-specific component) (Gc-globulin) (VDB) [MASS=52963]                 | 0.00 | 6.12  | 1.26 | 0.00 | 1 | 1 | 2 | TAM[147]DVFVC[330]TYFMPAAQLPELDPVELPTNK        | 1 |
| VWF_HUMAN (P04275) Von Willebrand factor precursor (vWF) [Contains: Von Willebrand antigen II] [MASS=309298]                              | 0.00 | 3.02  | 0.52 | 0.00 | 1 | 4 | 1 | VIVIPVGIGPHANLKQIR                             | 1 |
|                                                                                                                                           |      |       |      |      |   |   | 3 | M[147]IPARFAGVLLALALILPGTLC[339]AEGTR          | 1 |
|                                                                                                                                           |      |       |      |      |   |   | 2 | IDRPEASRIALLLM[147]ASQEPQR                     | 1 |
|                                                                                                                                           |      |       |      |      |   |   | 2 | VAVVEYHDGSHAYIGLKDR                            | 1 |
| WBS22_HUMAN (O43709) Putative methyltransferase WBSCR22 (EC 2.1.1.-) (Williams-Beuren syndrome chromosome region 22 protein) [MASS=31880] | *    | 5.69  | *    | *    | * | 1 | 3 | AGFSGGMVVDYPNSAK                               | 1 |
| WDFY3_HUMAN (Q8IZQ1) WD repeat and FYVE domain-containing protein 3 (Autophagy-linked FYVE protein) (Alfy) [MASS=395256]                  | *    | 2.41  | *    | *    | * | 5 | 3 | EFGGARC[339]AHNIVKYPQC[339]R                   | 1 |
|                                                                                                                                           |      |       |      |      |   |   | 2 | DVFREVGLEVM[147]VNLHLYAALLK                    | 1 |
|                                                                                                                                           |      |       |      |      |   |   | 2 | VFSWSVSDQPGRSAADHWVK                           | 1 |
|                                                                                                                                           |      |       |      |      |   |   | 2 | ALVC[330]VVK                                   | 1 |
|                                                                                                                                           |      |       |      |      |   |   | 2 | ILVLLSNQSILIKFK                                | 1 |
| WDR22_HUMAN (Q96JK2) WD repeat protein 22 (Breakpoint cluster region protein 2) (BCRP2) [MASS=103963]                                     | *    | 5.10  | *    | *    | * | 2 | 2 | EAC[330]LNIAMAQRNQDLPEEGC[339]SK               | 1 |
|                                                                                                                                           |      |       |      |      |   |   | 3 | LPVFQFDNQGYFNCS[330]TM[147]KSC[330]C[339]FAGDR | 1 |
| WDR24_HUMAN (Q96S15) WD repeat protein 24 [MASS=101989]                                                                                   | *    | 1.74  | *    | *    | * | 1 | 2 | IYAIEEEQFVEKLNLR                               | 1 |
| WDR33_HUMAN (Q9C0J8) WD repeat protein 33 (WD repeat protein WDC146) [MASS=145920]                                                        | *    | 5.46  | *    | *    | * | 4 | 2 | HEGRAPPR                                       | 1 |
|                                                                                                                                           |      |       |      |      |   |   | 2 | ENQGPAPQGMIM[147]GHPPQEM[147]R                 | 1 |
|                                                                                                                                           |      |       |      |      |   |   | 1 | GRGGPGPAQR                                     | 1 |
|                                                                                                                                           |      |       |      |      |   |   | 3 | DQRDM[147]RAIQPDAGYYNDLVPPIGMLNPM[147]NAVTTK   | 1 |
| WDR43_HUMAN (Q15061) WD repeat protein 43 [MASS=79118]                                                                                    | *    | 11.53 | *    | *    | * | 5 | 2 | VNC[330]IQWHQDSGC[330]LYSC[330]SDDK            | 1 |
|                                                                                                                                           |      |       |      |      |   |   | 3 | EPPVKLAVVC[339]R                               | 2 |
|                                                                                                                                           |      |       |      |      |   |   | 2 | MSLLLVYGSWFQPTIERVALNSR                        | 1 |
|                                                                                                                                           |      |       |      |      |   |   | 3 | TIKLWVLETKEVYR                                 | 1 |
|                                                                                                                                           |      |       |      |      |   |   | 2 | PLTSNC[330]TIQIATPGK                           | 1 |
|                                                                                                                                           |      |       |      |      |   |   | 2 | EFNEYQAHAGPITK                                 | 2 |
| WDR65_HUMAN (Q96MR6) WD repeat protein 65 [MASS=78164]                                                                                    | 0.00 | 9.03  | 1.21 | 0.00 | 1 | 4 | 3 | GFAC[330]SAGPGRVLLFEK                          | 1 |
|                                                                                                                                           |      |       |      |      |   |   | 1 | GHTGKIR                                        | 1 |
|                                                                                                                                           |      |       |      |      |   |   | 2 | YLAISQTVQEKPAITIELSSIPC[330]RK                 | 1 |

|                                                                                                                                                                                                                                 |      |       |      |      |   |   |   |                                           |   |
|---------------------------------------------------------------------------------------------------------------------------------------------------------------------------------------------------------------------------------|------|-------|------|------|---|---|---|-------------------------------------------|---|
| WDR6_HUMAN (Q9NNW5) WD repeat protein 6 [MASS=121724]                                                                                                                                                                           | 0.00 | 2.59  | 2.64 | 0.00 | 1 | 2 | 2 | GMNWLGLR                                  | 1 |
|                                                                                                                                                                                                                                 |      |       |      |      |   |   | 2 | WHTC[339]SAFLPPGDFLVC[339]GDRR            | 1 |
| WDR72_HUMAN (Q3MJ13) WD repeat protein 72 [MASS=123408]                                                                                                                                                                         | 0.00 | 4.45  | 3.40 | 0.04 | 2 | 2 | 2 | FC[339]TYTERLLLVFSKVC[339]WK              | 1 |
|                                                                                                                                                                                                                                 |      |       |      |      |   |   | 3 | LIC[339]GC[339]EDGTIIITQALNAAKARLLEGGSLVK | 1 |
|                                                                                                                                                                                                                                 |      |       |      |      |   |   | 2 | FC[330]TYTERLLLVFSKVC[339]WK              | 1 |
| WDR76_HUMAN (Q9H967) WD repeat protein 76 [MASS=69753]                                                                                                                                                                          | *    | 4.95  | *    | *    | * | 2 | 2 | TC[330]RRIIPPK                            | 1 |
|                                                                                                                                                                                                                                 |      |       |      |      |   |   | 2 | NISENADFFASLQLSAARLR                      | 1 |
|                                                                                                                                                                                                                                 |      |       |      |      |   |   | 3 | DAAHLGLLEC[339]QFQFRHER                   | 1 |
| WNT9B_HUMAN (O14905) Protein Wnt-9b precursor (Wnt-15) (Wnt-14b) [MASS=38971]                                                                                                                                                   | *    | 12.32 | *    | *    | * | 3 | 1 | GNKDLR                                    | 2 |
|                                                                                                                                                                                                                                 |      |       |      |      |   |   | 2 | GLAPRSGDLVYMEDSPSFC[339]R                 | 1 |
| XPO5_HUMAN (Q9HAV4) Exportin-5 (Exp5) (Ran-binding protein 21) [MASS=136310]                                                                                                                                                    | 0.00 | 3.16  | 2.38 | 0.00 | 1 | 2 | 3 | VLSDVDAFIAYVGTQDK                         | 1 |
|                                                                                                                                                                                                                                 |      |       |      |      |   |   | 2 | M[147]C[339]RDYPQLVLPNFDMLYNHVK           | 1 |
| XPP2_HUMAN (O43895) Xaa-Pro aminopeptidase 2 precursor (EC 3.4.11.9) (X-Pro aminopeptidase 2) (Membrane-bound aminopeptidase P) (Membrane-bound APP) (Membrane-bound AmP) (mAmP) (Aminoacylproline aminopeptidase) [MASS=75624] | *    | 3.71  | *    | *    | * | 1 | 3 | YLVWLEKNVPKGTVDEFSGAEIVDK                 | 1 |
| XYLT2_HUMAN (Q9H1B5) Xylosyltransferase 2 (EC 2.4.2.26) (Xylosyltransferase II) (xyIT-II) (XT-II) (Peptide O-xylosyltransferase 1) [MASS=96711]                                                                                 | *    | 3.35  | *    | *    | * | 1 | 3 | HC[339]QLTGKMSPGIQWDESQAQQPMDGPPVR        | 1 |
| YES_HUMAN (P07947) Proto-oncogene tyrosine-protein kinase Yes (EC 2.7.10.2) (p61-Yes) (c-Yes) [MASS=60670]                                                                                                                      | *    | 9.59  | *    | *    | * | 3 | 1 | GIFLVRESETK                               | 1 |
|                                                                                                                                                                                                                                 |      |       |      |      |   |   | 3 | LGQGC[330]FGEVWM[147]GTWNGTTKVAIK         | 1 |
|                                                                                                                                                                                                                                 |      |       |      |      |   |   | 2 | LTTVC[330]PTVKPQTQGLAK                    | 1 |
| YJDC_HUMAN (Q96F86) YjeF domain-containing protein 1 (Edc3) [MASS=56077]                                                                                                                                                        | 0.00 | 3.74  | 0.68 | 0.00 | 1 | 1 | 3 | EFC[330]TDSGLVVPSISYELHK                  | 1 |
| YYAP1_HUMAN (Q9H869) YY1-associated protein 1 (Hepatocellular carcinoma susceptibility protein) (Hepatocellular carcinoma-associated protein 2) [MASS=87915]                                                                    | *    | 2.89  | *    | *    | * | 1 | 3 | SLAATPSSSLPC[330]TLIALGLRHEK              | 1 |



|                                                                                                                                                                                                      |      |      |       |      |   |   |                                                                                                                                                                                                                                                                         |                                      |
|------------------------------------------------------------------------------------------------------------------------------------------------------------------------------------------------------|------|------|-------|------|---|---|-------------------------------------------------------------------------------------------------------------------------------------------------------------------------------------------------------------------------------------------------------------------------|--------------------------------------|
| ZAN_HUMAN (Q9Y493) Zonadhesin precursor<br>[MASS=305571]                                                                                                                                             | 0.00 | 6.19 | 0.45  | 0.00 | 1 | 9 | 2 PSIPTEKPSIPTEK<br>2 VALPVWLAQGRVTIR<br>3 VC[330]HPAM[147]ALPLFKISAKHEK<br>2 DAHGGSIPLGK<br>3 TLVGGQQVTLPAIPSKGVFLGASGR<br>2 GGILEVSYIKAVHVTVFDLSISLLRGC[330]K<br>2 SQC[339]GC[330]KDAHGGSIPLGK<br>3 C[330]TYILAQPC[339]GNSTDPFFRVTA<br>3 NAVISLPSMYEGLVSGLC[330]GNYDK | 1<br>1<br>1<br>1<br>1<br>1<br>1<br>1 |
| ZBT11_HUMAN (O95625) Zinc finger and BTB<br>domain-containing protein 11 [MASS=119382]                                                                                                               | *    | 4.46 | *     | *    | * | 2 | 3 QFQC[330]ELC[330]VKSFVTK<br>3 ENVISSPEDSGM[147]GNDISAEDIC[330]AEDIPKHRQK                                                                                                                                                                                              | 1<br>1                               |
| ZBT39_HUMAN (O15060) Zinc finger and BTB<br>domain-containing protein 39 [MASS=79001]                                                                                                                | *    | 3.65 | *     | *    | * | 1 | 3 VLSFVYTSELFTDLINVGVIYEVAER                                                                                                                                                                                                                                            | 1                                    |
| ZBT40_HUMAN (Q9NUA8) Zinc finger and<br>BTB domain-containing protein 40<br>[MASS=138118]                                                                                                            | *    | 2.26 | *     | *    | * | 1 | 3 MYAC[330]QYC[330]DAVFAQSIELSRHVRTHTGDK                                                                                                                                                                                                                                | 1                                    |
| ZC3H5_HUMAN (Q9C0B0) Zinc finger CCCH<br>domain-containing protein 5 [MASS=88084]                                                                                                                    | 0.00 | 5.68 | 11.25 | 0.00 | 1 | 3 | 3 RDGTFNYSPDVYC[330]TK<br>3 C[339]NDMQQSGSC[339]PR<br>2 EFRTEQC[330]PLFVQHKC[339]TQHR                                                                                                                                                                                   | 1<br>1<br>1                          |
| ZCC2_HUMAN (Q7Z2W4) Zinc finger CCCH<br>type antiviral protein 1 (Zinc finger CCCH<br>domain-containing protein 2) [MASS=101444]                                                                     | 0.00 | 0.89 | 0.45  | 0.00 | 1 | 1 | 2 C[330]NYSQSER                                                                                                                                                                                                                                                         | 1                                    |
| ZCH11_HUMAN (Q5TAX3) Zinc finger CCHC<br>domain-containing protein 11 [MASS=185132]                                                                                                                  | *    | 5.23 | *     | *    | * | 4 | 2 LGLKQAEER<br>2 PVAIPNTSHDGHWPRTVAPNSLVNSGAVGNSEPGFR<br>2 NLVNAQQVAGSAQQQGDQSIR<br>2 ASSYQMKSEKVPSSPAEAEK                                                                                                                                                              | 1<br>1<br>1<br>1                     |
| ZCHC6_HUMAN (Q5VYS8) Zinc finger CCHC<br>domain-containing protein 6 [MASS=171228]                                                                                                                   | *    | 2.14 | *     | *    | * | 2 | 2 YTC[330]RLC[330]DVLIESIAFAHKHIK<br>2 RRDQEDALNQR                                                                                                                                                                                                                      | 1<br>1                               |
| ZDH14_HUMAN (Q8IZN3) Probable<br>palmitoyltransferase ZDHHC14 (EC 2.3.1.-)<br>(Zinc finger DHHC domain-containing protein<br>14) (DHHC-14) (NEW1 domain-containing<br>protein) (NEW1CP) [MASS=53388] | *    | 7.38 | *     | *    | * | 1 | 3 PGLGTPC[339]ASLTLGPPTPPASM[147]PNLAEATLADVMPRK                                                                                                                                                                                                                        | 1                                    |
| ZFHX2_HUMAN (Q9C0A1) Zinc finger<br>homeobox protein 2 [MASS=152100]                                                                                                                                 | *    | 5.05 | *     | *    | * | 3 | 2 IEGPERSQEEPKEGETEGETEVEGTEK<br>2 TQM[147]SSLQLKIM[147]KAC[330]YEAYR<br>3 GSGGSMPPPLRVPIK[330]TYHC[339]LAC[339]EVLLSGR                                                                                                                                                 | 1<br>1<br>1                          |

|                                                                                                                                                                                     |      |       |      |      |   |   |                                              |                       |   |
|-------------------------------------------------------------------------------------------------------------------------------------------------------------------------------------|------|-------|------|------|---|---|----------------------------------------------|-----------------------|---|
| ZHX2_HUMAN (Q9Y6X8) Zinc fingers and homeoboxes protein 2 (Zinc finger and homeodomain protein 2) (Alpha-fetoprotein regulator 1) (AFP regulator 1) (Regulator of AFP) [MASS=92306] | *    | 2.51  | *    | *    | * | 1 | 2                                            | WMEQYQHQPMAADHGYDAVAR | 1 |
| ZMYM3_HUMAN (Q14202) Zinc finger MYM-type protein 3 (Zinc finger protein 261) (DXS6673E protein) [MASS=152378]                                                                      | 0.60 | 3.87  | 0.40 | 0.00 | 1 | 3 | 3 SC[330]IAESPLWYSVIPMDRSM[147]LESM[147]LNR  | 1                     |   |
|                                                                                                                                                                                     |      |       |      |      |   |   | 2 RLVLESEC[330]SR                            | 1                     |   |
|                                                                                                                                                                                     |      |       |      |      |   |   | 2 GLKTNC[339]C[339]DQC[339]GAYIYTK           | 1                     |   |
|                                                                                                                                                                                     |      |       |      |      |   |   | 3 EVMLENYSNLVSLGISFSKPELITQLEQGK             | 1                     |   |
| ZN133_HUMAN (P52736) Zinc finger protein 133 [MASS=73402]                                                                                                                           | *    | 9.94  | *    | *    | * | 3 | 3 THSGEKPYMC[330]SEC[339]GR                  | 1                     |   |
|                                                                                                                                                                                     |      |       |      |      |   |   | 2 THSGEKPYMC[330]SEC[330]GRGFSQK             | 1                     |   |
| ZN217_HUMAN (O75362) Zinc finger protein 217 [MASS=115271]                                                                                                                          | *    | 2.39  | *    | *    | * | 1 | 2 SHRPQQNVGVQGAATRQQQSEMFPK                  | 1                     |   |
| ZN256_HUMAN (Q9Y2P7) Zinc finger protein 256 (Bone marrow zinc finger 3) (BMZF-3) [MASS=54872]                                                                                      | 0.00 | 5.49  | 3.68 | 0.04 | 2 | 2 | 2 SFSTSC[339]SLSDHLR                         | 2                     |   |
|                                                                                                                                                                                     |      |       |      |      |   |   | 3 SFIHSSSLITHQR                              | 1                     |   |
|                                                                                                                                                                                     |      |       |      |      |   |   | 3 DVSETSFQNA MLKPM[147]C[330]ETLTYISKEQLLSHK | 1                     |   |
| ZN294_HUMAN (O94822) Zinc finger protein 294 [MASS=200534]                                                                                                                          | 0.00 | 4.93  | 1.13 | 0.22 | 2 | 5 | 3 EQDIKTLPSHLC[339]TSALLSK                   | 1                     |   |
|                                                                                                                                                                                     |      |       |      |      |   |   | 2 TLPSHLC[339]TSALLSK                        | 1                     |   |
|                                                                                                                                                                                     |      |       |      |      |   |   | 2 THLPDFLIC[330]K                            | 1                     |   |
|                                                                                                                                                                                     |      |       |      |      |   |   | 2 SLLSQNKFWKYGK                              | 1                     |   |
|                                                                                                                                                                                     |      |       |      |      |   |   | 3 C[339]DDC[339]GFLADGLSGLNVHIAMK            | 1                     |   |
| ZN407_HUMAN (Q9C0G0) Zinc finger protein 407 (Fragment) [MASS=126979]                                                                                                               | 0.00 | 4.29  | 0.73 | 0.00 | 1 | 3 | 1 HLGMR                                      | 1                     |   |
|                                                                                                                                                                                     |      |       |      |      |   |   | 3 DHYRHTHGEKSFLC[330]DLC[330]GFAGGTR         | 1                     |   |
| ZN473_HUMAN (Q8WTR7) Zinc finger protein 473 (Zinc finger protein 100 homolog) (Zfp-100) [MASS=100182]                                                                              | *    | 2.07  | *    | *    | * | 1 | 3 HQRIHTGEKPYVC[330]QEC[339]GK               | 1                     |   |
| ZN479_HUMAN (Q96JC4) Zinc finger protein 479 (Zinc finger protein Kr19) (HKr19) [MASS=60598]                                                                                        | *    | 4.01  | *    | *    | * | 1 | 3 PYTC[339]EEC[339]GKAFNC[330]SSTLMQHK       | 1                     |   |
| ZN483_HUMAN (Q8TF39) Zinc finger protein 483 [MASS=85097]                                                                                                                           | *    | 3.36  | *    | *    | * | 2 | 3 VLSHSSALTEHQK                              | 1                     |   |
|                                                                                                                                                                                     |      |       |      |      |   |   | 2 VAQNKTLGSGSR                               | 1                     |   |
|                                                                                                                                                                                     |      |       |      |      |   |   | 3 PHKC[330]KEC[330]GIAFM[147]NSSLLNHHK       | 1                     |   |
| ZN485_HUMAN (Q8NCK3) Zinc finger protein 485 [MASS=50280]                                                                                                                           | *    | 13.83 | *    | *    | * | 3 | 2 QSTSEASVLGERTKSVMMMEK                      | 1                     |   |
|                                                                                                                                                                                     |      |       |      |      |   |   | 2 PYKC[339]NDC[339]GKAFAQNAALTR              | 1                     |   |
| ZN559_HUMAN (Q9BR84) Zinc finger protein 559 [MASS=62317]                                                                                                                           | *    | 1.12  | *    | *    | * | 1 | 1 TYFRKK                                     | 1                     |   |
| ZN563_HUMAN (Q8TA94) Zinc finger protein 563 [MASS=55434]                                                                                                                           | 0.63 | 3.15  | 6.40 | 0.00 | 1 | 1 | 2 RHM[147]IM[147]HTGGGPHKC[339]K             | 1                     |   |
| ZN571_HUMAN (Q7Z3V5) Zinc finger protein 571 [MASS=70801]                                                                                                                           | *    | 7.22  | *    | *    | * | 2 | 2 QGFSYLSLSC[339]LIQHEENHNIEKC[330]SEVK      | 1                     |   |
|                                                                                                                                                                                     |      |       |      |      |   |   | 3 ITC[339]EEKATESHSTSSTFHR                   | 1                     |   |

|                                                                                                                                                                                                      |      |       |      |      |   |   |   |                                  |    |
|------------------------------------------------------------------------------------------------------------------------------------------------------------------------------------------------------|------|-------|------|------|---|---|---|----------------------------------|----|
| ZN575_HUMAN (Q86XF7) Zinc finger protein 575 [MASS=26763]                                                                                                                                            | 0.00 | 7.35  | 0.43 | 0.00 | 1 | 1 | 3 | LC[330]HDPPTAPGSQATAWHR          | 1  |
|                                                                                                                                                                                                      |      |       |      |      |   |   | 1 | SYKC[339]KVC[339]DK              | 1  |
|                                                                                                                                                                                                      |      |       |      |      |   |   | 3 | VFSC[339]GSTLETHK                | 11 |
| ZN600_HUMAN (Q6ZNG1) Zinc finger protein 600 [MASS=83157]                                                                                                                                            | *    | 6.23  | *    | *    | * | 4 |   |                                  |    |
|                                                                                                                                                                                                      |      |       |      |      |   |   | 2 | HQIPHLGDK                        | 1  |
|                                                                                                                                                                                                      |      |       |      |      |   |   | 3 | C[339]KVC[339]DKTFGSDSHLK        | 1  |
| ZN625_HUMAN (Q96I27) Zinc finger protein 625 [MASS=34746]                                                                                                                                            | *    | 13.40 | *    | *    | * | 3 | 3 | RHRIM[147]HSGDGPYK               | 1  |
|                                                                                                                                                                                                      |      |       |      |      |   |   | 2 | QC[330]GKAFSHSGSLR               | 1  |
|                                                                                                                                                                                                      |      |       |      |      |   |   | 1 | THGRHTHTGEKPYEC[339]K            | 1  |
| ZN638_HUMAN (Q14966) Zinc finger protein 638 (Nuclear protein 220) (Zinc-finger matrix-like protein) (Cutaneous T-cell lymphoma-associated antigen se33-1) (CTCL tumor antigen se33-1) [MASS=220623] | *    | 4.30  | *    | *    | * | 6 | 3 | SKNLEDDTLSEC[339]K               | 1  |
|                                                                                                                                                                                                      |      |       |      |      |   |   | 2 | FSHADAQKMK                       | 1  |
|                                                                                                                                                                                                      |      |       |      |      |   |   | 1 | QKHLEAADK                        | 1  |
|                                                                                                                                                                                                      |      |       |      |      |   |   | 3 | PFGGLKDILILSSHKK                 | 1  |
|                                                                                                                                                                                                      |      |       |      |      |   |   | 2 | YPDEQLTPENM[147]PLILRDIRM[147]R  | 1  |
|                                                                                                                                                                                                      |      |       |      |      |   |   | 2 | YPDEQLTPENM[147]PLILR            | 1  |
| ZN639_HUMAN (Q9UID6) Zinc finger protein 639 (Zinc finger protein ZASC1) (Zinc finger protein ANC_2H01) [MASS=56054]                                                                                 | *    | 7.42  | *    | *    | * | 2 | 2 | HVAIEHTKIFPHVC[339]DDC[330]GK    | 1  |
|                                                                                                                                                                                                      |      |       |      |      |   |   | 2 | VC[330]KESFSTNM[147]LLIEHAK      | 1  |
| ZN655_HUMAN (Q8N720) Zinc finger protein 655 (Vav-interacting Krueppel-like protein) [MASS=57393]                                                                                                    | *    | 1.83  | *    | *    | * | 1 | 2 | QQGIHFREK                        | 1  |
| ZN708_HUMAN (P17019) Zinc finger protein 708 (Zinc finger protein 15-like 1) (Zinc finger protein KOX8) [MASS=64779]                                                                                 | *    | 2.84  | *    | *    | * | 1 | 3 | C[330]EEEC[330]GKAFNQSPNLTK      | 1  |
| ZN75A_HUMAN (Q96N20) Zinc finger protein 75A [MASS=34694]                                                                                                                                            | 0.00 | 10.47 | 1.25 | 0.00 | 1 | 2 | 2 | RTHTGEQPYTC[339]SIC[339]R        | 1  |
|                                                                                                                                                                                                      |      |       |      |      |   |   | 2 | VPQKTAGKENHFDMPHR                | 1  |
| ZNF18_HUMAN (P17022) Zinc finger protein 18 (Zinc finger protein KOX11) (Heart development-specific gene 1 protein) [MASS=62288]                                                                     | 0.00 | 6.56  | *    | *    | * | 2 | 3 | THTGETYFQC[339]TIC[339]K         | 1  |
|                                                                                                                                                                                                      |      |       |      |      |   |   | 2 | QLGQHLPNPHSGEM[147]STM[147]WLEEK | 2  |

|                                                                                                                                                   |      |       |      |      |   |   |   |                                          |   |
|---------------------------------------------------------------------------------------------------------------------------------------------------|------|-------|------|------|---|---|---|------------------------------------------|---|
| ZNF20_HUMAN (P17024) Zinc finger protein 20 (Zinc finger protein KOX13) [MASS=61567]                                                              | *    | 5.45  | *    | *    | * | 2 | 1 | NLTSVGK                                  | 3 |
|                                                                                                                                                   |      |       |      |      |   |   | 3 | AFYFLNLC[339]LIHERIHTGVKPYK              | 1 |
| ZNF30_HUMAN (P17039) Zinc finger protein 30 (Zinc finger protein KOX28) [MASS=62123]                                                              | *    | 3.51  | *    | *    | * | 1 | 2 | PYEC[330]KEC[330]GKSFTVYQQLTR            | 1 |
| ZNF38_HUMAN (P17036) Zinc finger protein 38 (Zinc finger protein KOX25) (Zinc finger protein HF.12) (Zinc finger protein 3) (HZF3.1) [MASS=50916] | *    | 9.19  | *    | *    | * | 2 | 2 | C[339]DEC[330]SKSFNRTSDLIQHQR            | 1 |
|                                                                                                                                                   |      |       |      |      |   |   | 3 | PYEC[330]NEC[339]GKAFSQSSSHLYQHQR        | 1 |
| ZNF6_HUMAN (Q9Y462) Zinc finger protein 6 [MASS=87209]                                                                                            | 0.44 | 3.76  | 1.76 | 0.00 | 1 | 2 | 2 | YC[339]DYETAEQGLLNR                      | 1 |
|                                                                                                                                                   |      |       |      |      |   |   | 3 | VSFHNHLESHKLINK                          | 1 |
| ZNF85_HUMAN (Q03923) Zinc finger protein 85 (Zinc finger protein HPF4) (HTF1) [MASS=68718]                                                        | 0.27 | 3.03  | 1.25 | 0.00 | 1 | 1 | 2 | RHEIM[147]VAKPTVM[147]C[339]SHFAR        | 1 |
|                                                                                                                                                   |      |       |      |      |   |   | 3 | M[147]C[330]PEIARLLTPHIYQDLENHPSVLKYEK   | 1 |
|                                                                                                                                                   |      |       |      |      |   |   | 2 | AYM[147]SIM[147]TQMK                     | 1 |
|                                                                                                                                                   |      |       |      |      |   |   | 3 | VC[339]LPAYVVGMITPIPIR                   | 1 |
| ZNFX1_HUMAN (Q9P2E3) NFX1-type zinc finger-containing protein 1 [MASS=220225]                                                                     | *    | 8.92  | *    | *    | * | 9 | 1 | FVRWQNSK                                 | 1 |
|                                                                                                                                                   |      |       |      |      |   |   | 3 | IITPM[147]C[339]SSSGIVYKVQFDTK           | 1 |
|                                                                                                                                                   |      |       |      |      |   |   | 2 | PSANVYDLAKNFNLEVSLEFR                    | 1 |
|                                                                                                                                                   |      |       |      |      |   |   | 2 | KGMYC[339]IGNMQMLAK                      | 1 |
|                                                                                                                                                   |      |       |      |      |   |   | 3 | LNQHRM[147]C[330]PEIARLLTPHIYQDLENHPSVLK | 1 |
|                                                                                                                                                   |      |       |      |      |   |   | 3 | KGMYC[330]IGNMQM[147]LAKVPLWSK           | 1 |
| ZNT3_HUMAN (Q99726) Zinc transporter 3 (ZnT-3) (Solute carrier family 30 member 3) [MASS=41944]                                                   | 0.66 | 17.78 | 0.92 | 0.04 | 2 | 3 | 2 | M[147]EPSPAAGGLETTRLVSPR                 | 1 |
|                                                                                                                                                   |      |       |      |      |   |   | 3 | AADPISTFLFSIC[330]ALGSTAPTLDVLR          | 1 |
|                                                                                                                                                   |      |       |      |      |   |   | 3 | AADPISTFLFSIC[339]ALGSTAPTLR             | 1 |
| ZSWM2_HUMAN (Q8NEG5) Zinc finger SWIM domain-containing protein 2 [MASS=72720]                                                                    | *    | 3.63  | *    | *    | * | 1 | 3 | NIVC[330]PTAM[147]ESPC[339]ISGKYHTSLSR   | 1 |
| ZXDA_HUMAN (P98168) Zinc finger X-linked protein ZXDA [MASS=84770]                                                                                | 0.00 | 3.75  | 0.52 | 0.00 | 1 | 2 | 2 | M[147]HLLTHSSSQGQRPFK                    | 1 |
|                                                                                                                                                   |      |       |      |      |   |   | 2 | EQELFSC[330]SFPGC[330]SK                 | 1 |
| ZXDB_HUMAN (P98169) Zinc finger X-linked protein ZXDB [MASS=84792]                                                                                | 0.00 | 3.36  | *    | *    | * | 1 | 3 | EEAEEGPGQLQGEGGANPAGPTALGPR              | 1 |

## Table 4. MCI mitochondrial samples

### Experiment 2

| Description                                                                                                                                                                                                                                   | A = Protein Score |                      |                      |                      | E = XPress Peptides |   |   | G                                  | Peptide Sequence | H |
|-----------------------------------------------------------------------------------------------------------------------------------------------------------------------------------------------------------------------------------------------|-------------------|----------------------|----------------------|----------------------|---------------------|---|---|------------------------------------|------------------|---|
|                                                                                                                                                                                                                                               | A                 | B = Percent Coverage | C = XPress H2L Ratio | D = XPress Std. Dev. | E                   | F | G |                                    |                  |   |
| 1433E_HUMAN (P62258) 14-3-3 protein epsilon (14-3-3E) [MASS=29174]                                                                                                                                                                            | *                 | 12.94                | *                    | *                    | *                   | 2 | 2 | YDEM[147]VESM[147]K                | 1                |   |
| 1433F_HUMAN (Q04917) 14-3-3 protein eta (Protein AS1) [MASS=28087]                                                                                                                                                                            | 0.80              | 7.76                 | 0.91                 | 0.07                 | 2                   | 1 | 3 | LIC[330]C[339]DILDVLDKHLIPAANTGESK | 1                |   |
| 1433G_HUMAN (P61981) 14-3-3 protein gamma (Protein kinase C inhibitor protein 1) (KCIP-1) [MASS=28171]                                                                                                                                        | 1.00              | 18.29                | 0.90                 | 0.04                 | 5                   | 2 | 3 | ELETVC[339]NDVLSLLDKFLIK           | 1                |   |
| 1433T_HUMAN (P27348) 14-3-3 protein theta (14-3-3 protein tau) (14-3-3 protein T-cell) (HS1 protein) [MASS=27764]                                                                                                                             | 1.00              | 14.69                | 0.79                 | 0.06                 | 5                   | 2 | 2 | ELETVC[339]NDVLSLLDKFLIK           | 1                |   |
| 1433Z_HUMAN (P63104) 14-3-3 protein zeta/delta (Protein kinase C inhibitor protein 1) (KCIP-1) [MASS=27745]                                                                                                                                   | 1.00              | 17.55                | 0.61                 | 0.02                 | 2                   | 3 | 3 | ELEAVC[330]QDVLSLLDNYLIK           | 1                |   |
| 2AAA_HUMAN (P30153) Serine/threonine-protein phosphatase 2A 65 kDa regulatory subunit A alpha isoform (PP2A, subunit A, PR65-alpha isoform) (PP2A, subunit A, R1-alpha isoform) (Medium tumor antigen-associated 61 kDa protein) [MASS=65092] | 0.97              | 8.50                 | 0.58                 | 0.00                 | 1                   | 2 | 2 | LGLALNYSVFYYEIQNAPEQAC[330]HLAK    | 1                |   |
| 3BHS7_HUMAN (Q9H2F3) 3 beta-hydroxysteroid dehydrogenase type 7 (3 beta-hydroxysteroid dehydrogenase type VII) (3Beta-HSD VII) (3-beta-hydroxy-delta(5)-C27 steroid oxidoreductase) (EC 1.1.1.-) (C(27) 3beta-HSD) [MASS=41016]               | 0.00              | 1.90                 | 0.43                 | 0.00                 | 1                   | 1 | 2 | ELEAVC[339]QDVLSLLDNYLIK           | 1                |   |
| 3BP2_HUMAN (P78314) SH3 domain-binding protein 2 (3BP-2) [MASS=62243]                                                                                                                                                                         | 0.00              | 4.46                 | 0.56                 | 0.00                 | 1                   | 1 | 3 | YLAEVAC[330]GDDRK                  | 1                |   |
|                                                                                                                                                                                                                                               |                   |                      |                      |                      |                     |   |   | SIC[330]TTVLELLDKYLIANATNPESK      | 1                |   |
|                                                                                                                                                                                                                                               |                   |                      |                      |                      |                     |   |   | SIC[339]TTVLELLDKYLIANATNPESK      | 2                |   |
|                                                                                                                                                                                                                                               |                   |                      |                      |                      |                     |   |   | YLAEVAC[339]GDDRK                  | 1                |   |
|                                                                                                                                                                                                                                               |                   |                      |                      |                      |                     |   |   | IETELRDIC[330]NDVLSLLEK            | 1                |   |
|                                                                                                                                                                                                                                               |                   |                      |                      |                      |                     |   |   | IETELRDIC[339]NDVLSLLEK            | 1                |   |
|                                                                                                                                                                                                                                               |                   |                      |                      |                      |                     |   |   | LAEQAERYDDM[147]AAC[339]M[147]K    | 1                |   |
|                                                                                                                                                                                                                                               |                   |                      |                      |                      |                     |   |   | YDDMAAC[330]M[147]K                | 1                |   |
|                                                                                                                                                                                                                                               |                   |                      |                      |                      |                     |   |   | AVGPEITKTDLVPFQNLKDC[330]EAEVR     | 1                |   |
|                                                                                                                                                                                                                                               |                   |                      |                      |                      |                     |   |   | DNTIEHLLPLFLAQLKDEC[339]PEVR       | 1                |   |
|                                                                                                                                                                                                                                               |                   |                      |                      |                      |                     |   |   | HPYPC[330]SK                       | 1                |   |
|                                                                                                                                                                                                                                               |                   |                      |                      |                      |                     |   |   | RC[330]VYYFKSSTSASPQGAFLSLSGYNR    | 1                |   |

|                                                                                                                                                                                                                                                                             |      |       |      |      |   |   |   |                                         |   |
|-----------------------------------------------------------------------------------------------------------------------------------------------------------------------------------------------------------------------------------------------------------------------------|------|-------|------|------|---|---|---|-----------------------------------------|---|
| 5NTC_HUMAN (P49902) Cytosolic purine 5'-nucleotidase (EC 3.1.3.5) (5'-nucleotidase cytosolic II) [MASS=64969]                                                                                                                                                               | *    | 5.53  | *    | *    | * | 1 | 3 | GLVFDTLYGNLLKVDAYGNLLVC[330]AHGFNFIR    | 1 |
| A20A1_HUMAN (Q5TYW2) Ankyrin repeat domain-containing protein 20A1 [MASS=94047]                                                                                                                                                                                             | *    | 2.31  | *    | *    | * | 1 | 3 | ENAWLVQQLDDVHQBKEDHK                    | 1 |
| AADAT_HUMAN (Q8N5Z0) Kynurenine/alpha-aminoadipate aminotransferase mitochondrial precursor (KAT/AadAT) (Kynurenine--oxoglutarate transaminase II) (EC 2.6.1.7) (Kynurenine aminotransferase II) (Kynurenine--oxoglutarate aminotransferase II) (2-aminoadipat [MASS=47351] | 0.00 | 7.06  | 1.77 | 0.00 | 1 | 1 | 2 | LHNPPTIHYPPSQGQMDLC[339]VTSGSQQLC[339]K | 1 |
| AATM_HUMAN (P00505) Aspartate aminotransferase, mitochondrial precursor (EC 2.6.1.1) (Transaminase A) (Glutamate oxaloacetate transaminase 2) [MASS=47475]                                                                                                                  | 1.00 | 18.84 | 1.41 | 0.07 | 7 | 5 | 2 | NM[147]GLYGERVGAFTM[147]VC[330]KDADEAK  | 1 |
|                                                                                                                                                                                                                                                                             |      |       |      |      |   |   | 2 | VGAFTMVC[339]K                          | 1 |
|                                                                                                                                                                                                                                                                             |      |       |      |      |   |   | 2 | NLDKEYLPIGGLAEFC[339]K                  | 2 |
|                                                                                                                                                                                                                                                                             |      |       |      |      |   |   | 2 | VGAFTM[147]VC[330]K                     | 1 |
|                                                                                                                                                                                                                                                                             |      |       |      |      |   |   | 2 | VGAFTM[147]VC[339]K                     | 1 |
| ABCA1_HUMAN (O95477) ATP-binding cassette sub-family A member 1 (ATP-binding cassette transporter 1) (ATP-binding cassette 1) (ABC-1) (Cholesterol efflux regulatory protein) [MASS=254284]                                                                                 | *    | 6.10  | *    | *    | * | 7 | 2 | TC[339]GFDFTGAVEDISK                    | 1 |
|                                                                                                                                                                                                                                                                             |      |       |      |      |   |   | 2 | HFIEQGINVC[339]LC[339]QSYAK             | 1 |
|                                                                                                                                                                                                                                                                             |      |       |      |      |   |   | 2 | TLNSTSPFPSK                             | 1 |
|                                                                                                                                                                                                                                                                             |      |       |      |      |   |   | 2 | KVLRTLQQIK                              | 1 |
|                                                                                                                                                                                                                                                                             |      |       |      |      |   |   | 3 | SM[147]PLFM[147]TLAWIYSVAVIIKGVYEKEAR   | 1 |
| ABCB8_HUMAN (Q9NUT2) ATP-binding cassette sub-family B member 8, mitochondrial precursor (Mitochondrial ATP-binding cassette 1) (M-ABC1) [MASS=79947]                                                                                                                       | 0.00 | 3.27  | 0.41 | 0.00 | 1 | 1 | 3 | HRNM[147]LQYQLPSSLARIFSIQSQSK           | 1 |
|                                                                                                                                                                                                                                                                             |      |       |      |      |   |   | 2 | IRMDIDNVERTNK                           | 1 |
|                                                                                                                                                                                                                                                                             |      |       |      |      |   |   | 3 | TTTMSILTGLFPPTSGTAYILGKDIRSEM[147]STIR  | 1 |
|                                                                                                                                                                                                                                                                             |      |       |      |      |   |   | 2 | LAKDSSADRFLNSLGR                        | 1 |
|                                                                                                                                                                                                                                                                             |      |       |      |      |   |   | 3 | QC[330]QEHARAM[147]GVADEALGNVRTVR       | 1 |
| ABHD5_HUMAN (Q8WTS1) Abhydrolase domain-containing protein 5 [MASS=39095]                                                                                                                                                                                                   | 0.00 | 2.01  | 1.30 | 0.00 | 1 | 1 | 2 | C[330]ALGLDK                            | 1 |

|                                                                                                                                                                                                                 |      |       |      |      |   |   |   |                                                  |   |
|-----------------------------------------------------------------------------------------------------------------------------------------------------------------------------------------------------------------|------|-------|------|------|---|---|---|--------------------------------------------------|---|
| ACAD8_HUMAN (Q9UKU7) Acyl-CoA dehydrogenase family member 8, mitochondrial precursor (EC 1.3.99.-) (ACAD-8) (Isobutyryl-CoA dehydrogenase) (Activator-recruited cofactor 42 kDa component) (ARC42) [MASS=45070] | 0.00 | 14.46 | 1.23 | 0.00 | 1 | 3 | 2 | IGSEGGFLIAVRGLNGGR                               | 1 |
|                                                                                                                                                                                                                 |      |       |      |      |   |   | 2 | LGC[330]LPGGLRVLVQTGHR                           | 1 |
|                                                                                                                                                                                                                 |      |       |      |      |   |   | 2 | FASYC[330]LTEPGSGSDAASLLTSAKK                    | 1 |
| ACADS_HUMAN (P16219) Short-chain specific acyl-CoA dehydrogenase, mitochondrial precursor (EC 1.3.99.2) (SCAD) (Butyryl-CoA dehydrogenase) [MASS=44297]                                                         | *    | 1.94  | *    | *    | * | 1 | 1 | M[147]AAALLAR                                    | 1 |
| ACL7B_HUMAN (Q9Y614) Actin-like protein 7B (Actin-like-7-beta) (Actin-like 7B) [MASS=45233]                                                                                                                     | 0.00 | 4.58  | 2.98 | 0.00 | 1 | 1 | 3 | C[339]GYAGEPRPTYFISSTVGK                         | 1 |
| ACON_HUMAN (Q99798) Aconitate hydratase, mitochondrial precursor (EC 4.2.1.3) (Citrate hydro-lyase) (Aconitase) [MASS=85425]                                                                                    | 1.00 | 6.79  | 1.29 | 0.13 | 3 | 3 | 3 | VAVPSTIHC[339]DHLIEAQVGGEK                       | 1 |
|                                                                                                                                                                                                                 |      |       |      |      |   |   | 3 | VAVPSTIHC[330]DHLIEAQVGGEK                       | 1 |
|                                                                                                                                                                                                                 |      |       |      |      |   |   | 2 | VGLIGSC[330]TNSSYEDM[147]GR                      | 1 |
|                                                                                                                                                                                                                 |      |       |      |      |   |   | 3 | WVIGDENYEGGSSR                                   | 1 |
| ACOT9_HUMAN (Q9Y305) Acyl-coenzyme A thioesterase 9 (EC 3.1.2.-) (Acyl-CoA thioesterase 9) (Acyl-CoA thioester hydrolase 9) [MASS=46354]                                                                        | 0.00 | 7.39  | 1.13 | 0.00 | 1 | 2 | 2 | TISFRSRVLPSSNAVWMENSK                            | 1 |
|                                                                                                                                                                                                                 |      |       |      |      |   |   | 2 | SLEIC[339]HPQER                                  | 1 |
|                                                                                                                                                                                                                 |      |       |      |      |   |   | 2 | C[330]DVIDIRK                                    | 2 |
|                                                                                                                                                                                                                 |      |       |      |      |   |   | 1 | C[339]DVIDIRK                                    | 1 |
| ACTB_HUMAN (P60709) Actin, cytoplasmic 1 (Beta-actin) [MASS=41736]                                                                                                                                              | 1.00 | 17.07 | 0.55 | 0.16 | 9 | 4 | 3 | C[330]PEALFQPSFLGMESC[330]GIHETTFNSIM[147]K      | 1 |
|                                                                                                                                                                                                                 |      |       |      |      |   |   | 2 | C[339]DVIDIRK                                    | 2 |
|                                                                                                                                                                                                                 |      |       |      |      |   |   | 2 | C[330]DVIDIR                                     | 1 |
|                                                                                                                                                                                                                 |      |       |      |      |   |   | 3 | C[339]PEALFQPSFLGM[147]ESC[339]GIHETTFNSIM[147]K | 1 |
|                                                                                                                                                                                                                 |      |       |      |      |   |   | 3 | LC[330]YVALDFEQEM[147]ATAASSSSLEK                | 1 |
| ACTY_HUMAN (P42025) Beta-centractin (Actin-related protein 1B) (ARP1B) [MASS=42293]                                                                                                                             | 0.99 | 2.93  | *    | *    | * | 1 | 2 | YC[330]FPNYVGRPK                                 | 1 |
| ACTZ_HUMAN                                                                                                                                                                                                      | 0.99 | 8.51  | 0.72 | 0.00 | 1 | 1 | 2 | M[147]ESYDVIANQPVVINDNGSGVIKAGFAGDQIPK           | 1 |
| ADA10_HUMAN (O14672) ADAM 10 precursor (EC 3.4.24.81) (A disintegrin and metalloproteinase domain 10) (Mammalian disintegrin-metalloprotease) (Kuzbanian protein homolog) (CDw156c antigen) [MASS=84142]        | *    | 3.61  | *    | *    | * | 1 | 3 | HFSGRTITLQPGSPC[339]NDFRGYC[339]DVFM[147]R       | 1 |

|                                                                                                                                                                                                                                |      |       |      |      |   |   |   |                                            |   |
|--------------------------------------------------------------------------------------------------------------------------------------------------------------------------------------------------------------------------------|------|-------|------|------|---|---|---|--------------------------------------------|---|
| ADA28_HUMAN (Q9UKQ2) ADAM 28 precursor (EC 3.4.24.-) (A disintegrin and metalloproteinase domain 28) (Metalloproteinase-like, disintegrin-like, and cysteine-rich protein-L) (MDC-L) (eMDC II) (ADAM23) [MASS=87208]           | *    | 2.58  | *    | *    | * | 1 | 3 | GYFSQGDQRYFIEPLSPIHR                       | 1 |
| ADAM2_HUMAN (Q99965) ADAM 2 precursor (A disintegrin and metalloproteinase domain 2) (Fertilin subunit beta) (PH-30) (PH30) [MASS=82457]                                                                                       | *    | 3.67  | *    | *    | * | 1 | 3 | IFSNC[339]SFEDFAHFISKQKSQC[339]LHNQPR      | 1 |
| ADCY7_HUMAN (P51828) Adenylate cyclase type 7 (EC 4.6.1.1) (Adenylate cyclase type VII) (ATP pyrophosphate-lyase 7) (Adenylyl cyclase 7) [MASS=120308]                                                                         | 0.00 | 9.07  | 1.27 | 0.00 | 1 | 4 | 3 | WQYDVVSHDVSLANRM[147]EAAGVPGRVHITEATLK     | 1 |
|                                                                                                                                                                                                                                |      |       |      |      |   |   | 3 | IQVTEETC[339]TILQGLGYSC[339]EC[339]RGLINVK | 1 |
|                                                                                                                                                                                                                                |      |       |      |      |   |   | 2 | RQQENLLSVLPAHISMGMK                        | 1 |
|                                                                                                                                                                                                                                |      |       |      |      |   |   | 2 | LRVGINHGPVIAGVIGAR                         | 1 |
| ADDA_HUMAN (P35611) Alpha-adducin (Erythrocyte adducin subunit alpha) [MASS=80955]                                                                                                                                             | 1.00 | 4.21  | 1.65 | 0.00 | 1 | 1 | 3 | C[330]GLLPISPEALSLGEVAYHDYHGILVDEEEK       | 1 |
| ADNP_HUMAN (Q9H2P0) Activity-dependent neuroprotector (Activity-dependent neuroprotective protein) [MASS=123562]                                                                                                               | *    | 1.91  | *    | *    | * | 2 | 3 | GPISDALAHHLRER                             | 1 |
|                                                                                                                                                                                                                                |      |       |      |      |   |   | 1 | SM[147]GLPPR                               | 1 |
|                                                                                                                                                                                                                                |      |       |      |      |   |   | 2 | YFAGNLASGGAAGATSLC[330]FVYPLDFAR           | 1 |
|                                                                                                                                                                                                                                |      |       |      |      |   |   | 2 | VKLLLQVQHASK                               | 2 |
|                                                                                                                                                                                                                                |      |       |      |      |   |   | 2 | EFHGLGDC[339]IHK                           | 2 |
| ADT1_HUMAN (P12235) ADP/ATP translocase 1 (Adenine nucleotide translocator 1) (ANT 1) (ADP,ATP carrier protein 1) (Solute carrier family 25 member 4) (ADP,ATP carrier protein, heart/skeletal muscle isoform T1) [MASS=32933] | 1.00 | 16.84 | 1.21 | 0.01 | 6 | 3 | 1 | EFHGLGDC[339]IHK                           | 2 |
|                                                                                                                                                                                                                                |      |       |      |      |   |   | 2 | YFAGNLASGGAAGATSLC[339]FVYPLDFAR           | 3 |
|                                                                                                                                                                                                                                |      |       |      |      |   |   | 2 | EFHGLGDC[330]IHK                           | 2 |
|                                                                                                                                                                                                                                |      |       |      |      |   |   | 3 | YFAGNLASGGAAGATSLC[339]FVYPLDFAR           | 2 |
|                                                                                                                                                                                                                                |      |       |      |      |   |   | 3 | YFAGNLASGGAAGATSLC[330]FVYPLDFAR           | 1 |



|                                                                                                                                                                                                                                                                               |      |       |      |      |   |    |   |                                                 |   |
|-------------------------------------------------------------------------------------------------------------------------------------------------------------------------------------------------------------------------------------------------------------------------------|------|-------|------|------|---|----|---|-------------------------------------------------|---|
| ADT2_HUMAN (P05141) ADP/ATP translocase 2 (Adenine nucleotide translocator 2) (ANT 2) (ADP,ATP carrier protein 2) (Solute carrier family 25 member 5) (ADP,ATP carrier protein, fibroblast isoform) [MASS=32764]                                                              | 1.00 | 25.59 | 0.58 | 0.44 | 2 | 3  | 1 | GLGDC[339]LVK                                   | 1 |
|                                                                                                                                                                                                                                                                               |      |       |      |      |   |    | 3 | TQFWRYFAGNLAGGGAAGATSLC[330]FVYPLDFAR           | 1 |
|                                                                                                                                                                                                                                                                               |      |       |      |      |   |    | 3 | GMLPDPKNTHIVISWMIAQTVTAVAGLTSYPFDTVR            | 1 |
|                                                                                                                                                                                                                                                                               |      |       |      |      |   |    | 1 | GLGDC[330]LVK                                   | 1 |
|                                                                                                                                                                                                                                                                               |      |       |      |      |   |    | 2 | GLGDC[339]LVK                                   | 1 |
| AFAM_HUMAN (P43652) Afamin precursor (Alpha-albumin) (Alpha-Alb) [MASS=69069]                                                                                                                                                                                                 | 0.00 | 1.50  | 0.40 | 0.00 | 1 | 1  | 2 | HNFSHC[330]C[330]SK                             | 1 |
| AFF4_HUMAN (Q9UHB7) AF4/FMR2 family member 4 (ALL1-fused gene from chromosome 5q31) (Major CDK9 elongation factor-associated protein) [MASS=127458]                                                                                                                           | *    | 7.31  | *    | *    | * | 5  | 3 | EFFAELDKVM[147]GPLIFNASIM[147]TDLVR             | 1 |
|                                                                                                                                                                                                                                                                               |      |       |      |      |   |    | 3 | FEKAVYYLDAVVSFIEC[330]GNALEKNAQESK              | 1 |
|                                                                                                                                                                                                                                                                               |      |       |      |      |   |    | 3 | NYLAPDATAADKR                                   | 1 |
|                                                                                                                                                                                                                                                                               |      |       |      |      |   |    | 2 | TSSSSKEVK                                       | 1 |
|                                                                                                                                                                                                                                                                               |      |       |      |      |   |    | 2 | SHGNDHHSK                                       | 1 |
| AFG32_HUMAN (Q9Y4W6) AFG3-like protein 2 (EC 3.4.24.-) (Paraplegin-like protein) [MASS=88483]                                                                                                                                                                                 | 0.00 | 10.16 | 1.48 | 0.04 | 2 | 4  | 3 | ADVEKVALLLLEKEVLDK                              | 1 |
|                                                                                                                                                                                                                                                                               |      |       |      |      |   |    | 3 | KLASLTPGFSGADVANC[339]NEAALIAAR                 | 1 |
|                                                                                                                                                                                                                                                                               |      |       |      |      |   |    | 2 | EKEEPPGEK                                       | 1 |
|                                                                                                                                                                                                                                                                               |      |       |      |      |   |    | 3 | MC[339]MTLGGRASEEIFFGRITGAQDDL                  | 1 |
| AKAP6_HUMAN (Q13023) A-kinase anchor protein 6 (Protein kinase A-anchoring protein 6) (PRKA6) (A-kinase anchor protein 100 kDa) (AKAP 100) (mAKAP) [MASS=256664]                                                                                                              | *    | 1.72  | *    | *    | * | 2  | 2 | DTELFIFNSC[330]LRQEKEGTM[147]NTEK               | 1 |
|                                                                                                                                                                                                                                                                               |      |       |      |      |   |    | 2 | LMQDIQHQNDEAIWEK                                | 1 |
| AKAP9_HUMAN (Q99996) A-kinase anchor protein 9 (Protein kinase A-anchoring protein 9) (PRKA9) (A-kinase anchor protein 450 kDa) (AKAP 450) (A-kinase anchor protein 350 kDa) (AKAP 350) (hgAKAP 350) (AKAP 120-like protein) (Protein hyperion) (Protein yotia) [MASS=453664] | *    | 5.63  | *    | *    | * | 12 | 2 | SLLSEIQALHAQMNGRK                               | 1 |
|                                                                                                                                                                                                                                                                               |      |       |      |      |   |    | 3 | MKSSVFDEDKTFVAETLEM[147]GEVVEK                  | 1 |
|                                                                                                                                                                                                                                                                               |      |       |      |      |   |    | 3 | DC[330]VLTISEEMFSK                              | 1 |
|                                                                                                                                                                                                                                                                               |      |       |      |      |   |    | 2 | AKIEELSLAFLVR                                   | 1 |
|                                                                                                                                                                                                                                                                               |      |       |      |      |   |    | 1 | GEMENALR                                        | 1 |
|                                                                                                                                                                                                                                                                               |      |       |      |      |   |    | 3 | QAHAVC[339]QQEQHYFNEM[147]K                     | 1 |
|                                                                                                                                                                                                                                                                               |      |       |      |      |   |    | 2 | SFEENGKGSINLETRLLQLESTVSAK                      | 1 |
|                                                                                                                                                                                                                                                                               |      |       |      |      |   |    | 3 | VTDESIPSYSYSGSDM[147]PRNDINM[147]WSKVTEEGTELSQR | 1 |
|                                                                                                                                                                                                                                                                               |      |       |      |      |   |    | 2 | QHMAQM[147]EEM[147]KTR                          | 1 |
|                                                                                                                                                                                                                                                                               |      |       |      |      |   |    | 3 | QSQMLEMQVELSSMKDRATELQEQLSSEK                   | 1 |
|                                                                                                                                                                                                                                                                               |      |       |      |      |   |    | 2 | AVIQC[330]LR                                    | 5 |
|                                                                                                                                                                                                                                                                               |      |       |      |      |   |    |   |                                                 |   |

|                                                                                                                                                                                              |      |       |      |      |   |   |   |                                        |   |
|----------------------------------------------------------------------------------------------------------------------------------------------------------------------------------------------|------|-------|------|------|---|---|---|----------------------------------------|---|
| AL2S8_HUMAN (Q8N187) Amyotrophic lateral sclerosis 2 chromosomal region candidate gene 8 protein (Calcium-response factor) (CaRF) (Protein NYD-SP24) [MASS=80697]                            | 0.00 | 2.07  | 1.01 | 0.00 | 1 | 1 | 2 | TSAQVFEHLIC[339]M[147]DSR              | 1 |
|                                                                                                                                                                                              |      |       |      |      |   |   | 3 | VHTEC[339]C[339]HGDILLEC[339]ADDRADLAK | 1 |
|                                                                                                                                                                                              |      |       |      |      |   |   | 3 | MPC[330]AEDYLSVVLNQLC[339]VLHEK        | 1 |
|                                                                                                                                                                                              |      |       |      |      |   |   | 3 | RHPYFYAPELLFFAKR                       | 1 |
| ALBU_HUMAN (P02768) Serum albumin precursor [MASS=69366]                                                                                                                                     | 1.00 | 19.87 | 0.63 | 0.24 | 6 | 7 | 2 | LKEC[330]C[330]EKPLLEK                 | 1 |
|                                                                                                                                                                                              |      |       |      |      |   |   | 2 | RPC[330]FSALEVDETYVPK                  | 1 |
|                                                                                                                                                                                              |      |       |      |      |   |   | 2 | C[330]C[330]AAADPHEC[330]YAK           | 1 |
|                                                                                                                                                                                              |      |       |      |      |   |   | 3 | ALVLIIFAQYLQQC[330]PFEDHVK             | 1 |
|                                                                                                                                                                                              |      |       |      |      |   |   | 3 | M[147]PC[330]AEDYLSVVLNQLC[330]VLHEK   | 1 |
| ALDH2_HUMAN (P05091) Aldehyde dehydrogenase, mitochondrial precursor (EC 1.2.1.3) (ALDH class 2) (ALDH1) (ALDH-E2) [MASS=56381]                                                              | 1.00 | 12.38 | 2.83 | 0.11 | 4 | 3 | 3 | TFPTVNPSTGEVIC[339]QVAEGDKEDVDK        | 1 |
|                                                                                                                                                                                              |      |       |      |      |   |   | 2 | TFPTVNPSTGEVIC[339]QVAEGDKEDVDK        | 1 |
|                                                                                                                                                                                              |      |       |      |      |   |   | 3 | KTFPTVNPSTGEVIC[339]QVAEGDKEDVDK       | 1 |
|                                                                                                                                                                                              |      |       |      |      |   |   | 2 | LLC[330]GGGIAADR                       | 1 |
|                                                                                                                                                                                              |      |       |      |      |   |   | 2 | LLC[339]GGGIAADR                       | 1 |
| ALDOA_HUMAN (P04075) Fructose-bisphosphate aldolase A (EC 4.1.2.13) (Muscle-type aldolase) (Lung cancer antigen NY-LU-1) [MASS=39289]                                                        | 1.00 | 20.66 | 0.51 | 0.56 | 8 | 6 | 1 | C[330]AQYK                             | 1 |
|                                                                                                                                                                                              |      |       |      |      |   |   | 3 | ALSDHHIYLEGTLKPNM[147]VTPGHAC[330]TQK  | 1 |
|                                                                                                                                                                                              |      |       |      |      |   |   | 2 | C[330]QYVTEK                           | 1 |
|                                                                                                                                                                                              |      |       |      |      |   |   | 2 | C[330]AQYKK                            | 1 |
|                                                                                                                                                                                              |      |       |      |      |   |   | 2 | VNPC[330]IGGVILFHETLYQK                | 1 |
|                                                                                                                                                                                              |      |       |      |      |   |   | 2 | ALANSLAC[330]QGK                       | 2 |
|                                                                                                                                                                                              |      |       |      |      |   |   | 2 | ALANSLAC[339]QGK                       | 1 |
|                                                                                                                                                                                              |      |       |      |      |   |   | 2 | VNPC[339]IGGVILFHETLYQK                | 1 |
| ALDOC_HUMAN (P09972) Fructose-bisphosphate aldolase C (EC 4.1.2.13) (Brain-type aldolase) [MASS=39324]                                                                                       | 0.95 | 6.61  | 1.18 | 0.00 | 1 | 1 | 3 | C[330]IGGVIFFHETLYQKDDNGVPFVR          | 1 |
| ALG12_HUMAN (Q9BV10) Dolichyl-P-Man:Man(7)GlcNAc(2)-PP-dolichyl-alpha-1,6-mannosyltransferase (EC 2.4.1.-) (Mannosyltransferase ALG12 homolog) (hALG12) (Membrane protein SB87) [MASS=54654] | 0.00 | 13.52 | 2.83 | 0.00 | 1 | 3 | 3 | VELC[339]LFLGLLLLLLALGNRK              | 1 |
|                                                                                                                                                                                              |      |       |      |      |   |   | 2 | RTHAPTVALGFMALYSLLPHK                  | 1 |
|                                                                                                                                                                                              |      |       |      |      |   |   | 2 | TLPNVLALPVVLLALAAWLREHAWAR             | 1 |
| ALMS1_HUMAN (Q8TCU4) Alstrom syndrome protein 1 [MASS=460933]                                                                                                                                | 0.00 | 1.15  | *    | *    | * | 2 | 3 | ASLPVGEKPLQENADASVQVLITGDENLSDKK       | 1 |
|                                                                                                                                                                                              |      |       |      |      |   |   | 2 | TGTPTVTSTSYSQHR                        | 1 |
| ALU2_HUMAN (P39189) Alu subfamily SB sequence contamination warning entry [MASS=63802]                                                                                                       | 0.00 | 4.60  | 1.53 | 0.00 | 1 | 1 | 2 | EPPRPAXXXFFXDGVSLC[330]RPGWSAVAR       | 1 |

|                                                                                                                                                                 |      |      |      |      |   |   |   |                                          |    |
|-----------------------------------------------------------------------------------------------------------------------------------------------------------------|------|------|------|------|---|---|---|------------------------------------------|----|
| ALU7_HUMAN (P39194) Alu subfamily SQ sequence contamination warning entry [MASS=64513]                                                                          | 0.00 | 3.54 | 1.82 | 0.00 | 1 | 1 | 2 | NXPGVVAGAC[330]NPSYSGGXGRR               | 1  |
| AMOL1_HUMAN (Q81Y63) Angiotensin-like protein 1 [MASS=106573]                                                                                                   | 0.00 | 2.30 | *    | *    | * | 1 | 2 | HGNGQPANMPEYNAPALLELVR                   | 2  |
| AMOT_HUMAN (Q4VCS5) Angiotensin [MASS=118085]                                                                                                                   | 0.00 | 1.66 | 0.54 | 0.00 | 1 | 1 | 2 | C[330]LDM[147]EGRIKTLHAQIIEK             | 1  |
| ANK2_HUMAN (Q01484) Ankyrin-2 (Brain ankyrin) (Ankyrin-B) (Ankyrin, nonerythroid) [MASS=430341]                                                                 | 1.00 | 3.31 | 1.10 | 0.04 | 2 | 6 | 3 | TFGSSAHKTQTDSEAQESTATSDETK               | 1  |
|                                                                                                                                                                 |      |      |      |      |   |   | 2 | SERGLVEEEWVIVSDEEIEEAR                   | 1  |
|                                                                                                                                                                 |      |      |      |      |   |   | 2 | NGLSPLHM[147]AAQGDHVEC[330]VK            | 1  |
|                                                                                                                                                                 |      |      |      |      |   |   | 3 | NGLSPLHM[147]AAQGDHVEC[330]VK            | 1  |
|                                                                                                                                                                 |      |      |      |      |   |   | 2 | EKMADEQGDMDLQISPDRK                      | 1  |
|                                                                                                                                                                 |      |      |      |      |   |   | 2 | HQPVSTAGK                                | 1  |
|                                                                                                                                                                 |      |      |      |      |   |   | 3 | VNVADILTKHGADQDAHTKLGYPPLIVAC[339]HYGNVK | 1  |
| ANK3_HUMAN (Q12955) Ankyrin-3 (ANK-3) (Ankyrin-G) [MASS=480400]                                                                                                 | *    | 2.31 | *    | *    | * | 6 | 3 | M[147]VYHSPPGGEGASERIEETM[147]SVHDIMK    | 1  |
|                                                                                                                                                                 |      |      |      |      |   |   | 2 | AAAVDFTAR                                | 1  |
|                                                                                                                                                                 |      |      |      |      |   |   | 3 | TVQETRGTFTYTR                            | 1  |
|                                                                                                                                                                 |      |      |      |      |   |   | 2 | PC[339]VPVSM[147]KKMSR                   | 1  |
|                                                                                                                                                                 |      |      |      |      |   |   | 2 | TVATKGLDFPWSNNR                          | 1  |
|                                                                                                                                                                 |      |      |      |      |   |   | 3 | STSLKQTTVEETAVEREMPNDVSK                 | 1  |
| ANM1_HUMAN (Q99873) Protein arginine N-methyltransferase 1 (EC 2.1.1.-) (Interferon receptor 1-bound protein 4) [MASS=41485]                                    | *    | 5.54 | *    | *    | * | 1 | 3 | EPLVDVDPKQLVTNAC[330]LIK                 | 1  |
|                                                                                                                                                                 |      |      |      |      |   |   | 3 | SEHQFNIDSM[147]VHK                       | 12 |
| ANM3_HUMAN (O60678) Protein arginine N-methyltransferase 3 (EC 2.1.1.-) (Heterogeneous nuclear ribonucleoprotein methyltransferase-like protein 3) [MASS=59903] | *    | 2.45 | *    | *    | * | 1 |   |                                          |    |
| ANR11_HUMAN (Q6UB99) Ankyrin repeat domain-containing protein 11 (Ankyrin repeat-containing cofactor 1) [MASS=298068]                                           | *    | 2.70 | *    | *    | * | 6 | 2 | LIVSC[339]EQEILR                         | 1  |
|                                                                                                                                                                 |      |      |      |      |   |   | 2 | FSLSDDRDR                                | 1  |
|                                                                                                                                                                 |      |      |      |      |   |   | 2 | MLSQKDLEIEERHK                           | 1  |
|                                                                                                                                                                 |      |      |      |      |   |   | 3 | VLKHDRDHFK                               | 1  |
|                                                                                                                                                                 |      |      |      |      |   |   | 1 | ASLSEK                                   | 1  |
|                                                                                                                                                                 |      |      |      |      |   |   | 3 | RFQRSTQQLQQQLNTSTQQTR                    | 1  |

|                                                                                                                                                                                                                                                                              |      |       |      |      |   |   |   |                                       |   |
|------------------------------------------------------------------------------------------------------------------------------------------------------------------------------------------------------------------------------------------------------------------------------|------|-------|------|------|---|---|---|---------------------------------------|---|
| ANR12_HUMAN (Q6UB98) Ankyrin repeat domain-containing protein 12 (Ankyrin repeat-containing cofactor 2) (GAC-1 protein) [MASS=235652]                                                                                                                                        | *    | 2.04  | *    | *    | * | 2 | 3 | YDNTESEFLPESSSVKSC[339]KHK            | 1 |
|                                                                                                                                                                                                                                                                              |      |       |      |      |   |   | 2 | NVMTLGKSSFVSDNSLNRSR                  | 1 |
| ANR52_HUMAN (Q8NB46) Ankyrin repeat domain-containing protein 52 [MASS=115057]                                                                                                                                                                                               | *    | 1.86  | *    | *    | * | 1 | 2 | C[339]AEALAPLLSSLNVADRSGR             | 1 |
| ANXA2_HUMAN (P07355) Annexin A2 (Annexin II) (Lipocortin II) (Calpactin I heavy chain) (Chromobindin-8) (p36) (Protein I) (Placental anticoagulant protein IV) (PAP-IV) [MASS=38473]                                                                                         | 0.98 | 7.10  | 1.26 | 0.00 | 1 | 1 | 3 | GDLENAFLNLVQC[339]IQNKPLYFADR         | 1 |
| ANXA6_HUMAN (P08133) Annexin A6 (Annexin VI) (Lipocortin VI) (P68) (P70) (Protein III) (Chromobindin-20) (67 kDa calelectrin) (Calphobindin-II) (CPB-II) [MASS=75742]                                                                                                        | 1.00 | 5.21  | 0.72 | 0.19 | 2 | 3 | 2 | YEKSLYSM[147]IK                       | 1 |
|                                                                                                                                                                                                                                                                              |      |       |      |      |   |   | 2 | LIVGLMRPPAYC[330]DAK                  | 1 |
|                                                                                                                                                                                                                                                                              |      |       |      |      |   |   | 2 | QRQEVC[330]QSYK                       | 1 |
| AP1B1_HUMAN (Q10567) AP-1 complex subunit beta-1 (Adapter-related protein complex 1 beta-1 subunit) (Beta-adaptin 1) (Adaptor protein complex AP-1 beta-1 subunit) (Golgi adaptor HA1/AP1 adaptin beta subunit) (Clathrin assembly protein complex 1 beta larg [MASS=104606] | 0.53 | 2.63  | 0.95 | 0.00 | 1 | 2 | 2 | C[330]LKDEDPYVRK                      | 1 |
|                                                                                                                                                                                                                                                                              |      |       |      |      |   |   | 3 | GEIFELKAELNSDK                        | 1 |
| AP2A1_HUMAN (O95782) AP-2 complex subunit alpha-1 (Adapter-related protein complex 2 alpha-1 subunit) (Alpha-adaptin A) (Adaptor protein complex AP-2 alpha-1 subunit) (Clathrin assembly protein complex 2 alpha-A large chain) (100 kDa coated vesicle prote [MASS=107554] | 1.00 | 10.64 | 0.80 | 0.00 | 1 | 4 | 3 | YTEKQIGYLFISVLVNSNSELIRLINNAIK        | 1 |
|                                                                                                                                                                                                                                                                              |      |       |      |      |   |   | 3 | TSVQFQNFSPVTVHPGDLQTHLAVQTKR          | 1 |
|                                                                                                                                                                                                                                                                              |      |       |      |      |   |   | 2 | KKGPGAGSALDDGR                        | 1 |
|                                                                                                                                                                                                                                                                              |      |       |      |      |   |   | 3 | VAAQVDGGAQVQQVLNIEC[330]LRDFLTPPLLSVR | 1 |
| AP3B2_HUMAN (Q13367) AP-3 complex subunit beta-2 (Adapter-related protein complex 3 beta-2 subunit) (Beta3B-adaptin) (Adaptor protein complex AP-3 beta-2 subunit) (AP-3 complex beta-2 subunit) (Clathrin assembly protein complex 3 beta-2 large chain) (Neu [MASS=119058] | *    | 1.66  | *    | *    | * | 1 | 2 | LMGMNEITEKLM[147]LPDTC[339]R          | 1 |

|                                                                                                                                                                                          |      |       |      |      |   |   |   |                                    |   |
|------------------------------------------------------------------------------------------------------------------------------------------------------------------------------------------|------|-------|------|------|---|---|---|------------------------------------|---|
| AP3D1_HUMAN (O14617) AP-3 complex subunit delta-1 (Adapter-related protein complex 3 subunit delta-1) (Delta-adaptin 3) (AP-3 complex subunit delta) (Delta-adaptin) [MASS=130157]       | 0.00 | 3.99  | 1.49 | 0.00 | 1 | 3 | 3 | GSLQEDSQVTVAIVLENR                 | 1 |
|                                                                                                                                                                                          |      |       |      |      |   |   | 2 | C[339]SDSTLLSNLLEEM[147]K          | 1 |
|                                                                                                                                                                                          |      |       |      |      |   |   | 3 | LRILIEDSDQNLK                      | 1 |
| AP4B1_HUMAN (Q9Y6B7) AP-4 complex subunit beta-1 (Adapter-related protein complex 4 beta 1 subunit) (Beta subunit of AP-4) (AP-4 adapter complex beta subunit) [MASS=83261]              | *    | 2.03  | *    | *    | * | 1 | 3 | LLYYC[330]IEEEKDMAVR               | 1 |
| APOA_HUMAN (P08519) Apolipoprotein(a) precursor (EC 3.4.21.-) (Apo(a)) (Lp(a)) [MASS=501317]                                                                                             | 0.00 | 0.66  | 5.87 | 0.00 | 1 | 2 | 2 | TC[339]QSWSSMTPHWHR                | 1 |
|                                                                                                                                                                                          |      |       |      |      |   |   | 2 | TPENYPNAGLTENYC[339]JR             | 1 |
| APOD_HUMAN (P05090) Apolipoprotein D precursor (Apo-D) (ApoD) [MASS=21275]                                                                                                               | 0.77 | 6.35  | 1.12 | 0.00 | 1 | 1 | 2 | KM[147]TVTDQVNC[330]PK             | 1 |
|                                                                                                                                                                                          |      |       |      |      |   |   | 1 | QWAGLVEK                           | 1 |
| APOE_HUMAN (P02649) Apolipoprotein E precursor (Apo-E) [MASS=36154]                                                                                                                      | *    | 23.03 | *    | *    | * | 4 | 2 | AATVGSLAGQPLQER                    | 1 |
|                                                                                                                                                                                          |      |       |      |      |   |   | 3 | WVQTLSEQVQEELLSSQVTQELRALMDETMK    | 1 |
|                                                                                                                                                                                          |      |       |      |      |   |   | 2 | ELQAAQARLGADM[147]EDVC[339]GR      | 1 |
| ARC1B_HUMAN (O15143) Actin-related protein 2/3 complex subunit 1B (ARP2/3 complex 41 kDa subunit) (p41-ARC) [MASS=40818]                                                                 | 0.00 | 3.50  | 2.11 | 0.00 | 1 | 1 | 2 | AARC[339]VRWAPNENK                 | 1 |
| ARHG6_HUMAN (Q15052) Rho guanine nucleotide exchange factor 6 (Rac/Cdc42 guanine nucleotide exchange factor 6) (PAK-interacting exchange factor alpha) (Alpha-Pix) (COOL-2) [MASS=87498] | 0.00 | 3.99  | 2.07 | 0.00 | 1 | 2 | 2 | TIC[339]DPEEFLK                    | 1 |
|                                                                                                                                                                                          |      |       |      |      |   |   | 3 | TIC[330]DPEEFLKSSLKNGVVLC[330]K    | 1 |
| ARHGA_HUMAN (O15013) Rho guanine nucleotide exchange factor 10 [MASS=151611]                                                                                                             | *    | 1.24  | *    | *    | * | 1 | 2 | KAKASSALVVC[339]GGQGHR             | 1 |
| ARI2_HUMAN (O95376) Protein ariadne-2 homolog (ARI-2) (Triad1 protein) [MASS=57819]                                                                                                      | *    | 3.04  | *    | *    | * | 1 | 3 | C[330]RQM[147]YHAPTDC[330]ATIR     | 1 |
| ARI4A_HUMAN (P29374) AT-rich interactive domain-containing protein 4A (ARID domain-containing protein 4A) (Retinoblastoma-binding protein 1) (RBBP-1) [MASS=142666]                      | *    | 1.67  | *    | *    | * | 2 | 2 | IIWPLDK                            | 1 |
|                                                                                                                                                                                          |      |       |      |      |   |   | 2 | DNFLQQLYKFMEDR                     | 1 |
| ARL3_HUMAN (P36405) ADP-ribosylation factor-like protein 3 [MASS=20455]                                                                                                                  | 0.00 | 13.19 | 1.07 | 0.00 | 1 | 1 | 3 | VWQIQSC[330]SALTGEGVQDGMNWVC[330]K | 1 |

|                                                                                                                                                         |      |       |      |      |   |   |                                                                                                                                                                          |                                      |   |
|---------------------------------------------------------------------------------------------------------------------------------------------------------|------|-------|------|------|---|---|--------------------------------------------------------------------------------------------------------------------------------------------------------------------------|--------------------------------------|---|
| ARP3_HUMAN (P61158) Actin-like protein 3 (Actin-related protein 3) [MASS=47240]                                                                         | 0.99 | 7.19  | 0.47 | 0.00 | 1 | 1 | 2                                                                                                                                                                        | TLTGTVIDSGDGVTHVIPVAEGYVIGSC[330]IK  | 1 |
| ARP8_HUMAN (Q9H981) Actin-related protein 8 [MASS=70425]                                                                                                | 0.00 | 7.37  | 2.39 | 0.00 | 1 | 2 | 2 C[339]ILLIPDIYNKQHVK<br>3 LGDEKLQAPMALFYPTFGVIGQKM[147]TTLQHR                                                                                                          | 1<br>1                               |   |
| ARRD3_HUMAN (Q96B67) Arrestin domain-containing protein 3 [MASS=46394]                                                                                  | *    | 12.56 | *    | *    | * | 2 | 2 M[147]VVPKAAIYQTQAFYAKGK<br>3 MVLGKVKSLTISFDC[339]LNDSNVPVYSSGDTVSGR                                                                                                   | 1<br>1                               |   |
| ARS2_HUMAN (Q9BXP5) Arsenite-resistance protein 2 [MASS=100666]                                                                                         | 0.00 | 4.22  | 0.57 | 0.00 | 1 | 2 | 3 LLLYLRIVHSLDYNTC[330]EYPNEDEM[147]PNR<br>2 NINGITQHK                                                                                                                   | 1<br>1                               |   |
| ARSG_HUMAN (Q96EG1) Arylsulfatase G precursor (EC 3.1.6.-) (ASG) [MASS=57060]                                                                           | 0.00 | 5.71  | 0.38 | 0.00 | 1 | 1 | 3 MGWFLKVLLAGVSFSGFLYPLVDFC[330]ISGK                                                                                                                                     | 1                                    |   |
| ASCL3_HUMAN (Q9NQ33) Achaete-scute homolog 3 (bHLH transcriptional regulator Sgn-1) [MASS=20797]                                                        | *    | 18.33 | *    | *    | * | 1 | 3 LPLTRSFYLEPM[147]VTFHVHPEAPVSSPYSEELPR                                                                                                                                 | 1                                    |   |
| AT12A_HUMAN (P54707) Potassium-transporting ATPase alpha chain 2 (EC 3.6.3.10) (Proton pump) (Non-gastric H(+)/K(+) ATPase subunit alpha) [MASS=115898] | 0.00 | 4.32  | *    | *    | * | 4 | 3 ADIGIAMGIAGSDDAAK<br>2 LIIVEGC[330]QR<br>1 NC[330]LVK<br>3 FSEVILGDVMEIRKR                                                                                             | 1<br>1<br>1<br>1                     |   |
| AT1A1_HUMAN (P05023) Sodium/potassium-transporting ATPase alpha-1 chain precursor (EC 3.6.3.9) (Sodium pump 1) (Na+/K+ ATPase 1) [MASS=112895]          | 1.00 | 5.87  | 0.44 | 0.07 | 5 | 5 | 2 IISANGC[339]K<br>3 NLEAVETLGSTSTIC[330]SDKTGTLTQNR<br>2 IAGLC[339]NR<br>2 C[339]SSILLHGK<br>2 C[330]SSILLHGK<br>2 AC[330]VVHGSDLK<br>2 IISANGC[330]K<br>2 IAGLC[330]NR | 1<br>1<br>1<br>1<br>1<br>1<br>1<br>2 |   |
| AT1A2_HUMAN (P50993) Sodium/potassium-transporting ATPase alpha-2 chain precursor (EC 3.6.3.9) (Sodium pump 2) (Na+/K+ ATPase 2) [MASS=112265]          | 1.00 | 5.88  | 0.39 | 0.14 | 3 | 4 | 1 C[330]SSILLHGK<br>2 IISSHGC[339]K<br>2 C[330]IELSC[330]GSVR<br>2 EDSPQSHVLM[147]KGAPER<br>1 IISSHGC[330]K<br>3 EGEKM[147]QINAEVVVGDVLEVKGGDR                           | 1<br>1<br>1<br>1<br>1<br>1           |   |

|                                                                                                                                                                            |      |       |      |      |    |    |  |   |                                      |   |
|----------------------------------------------------------------------------------------------------------------------------------------------------------------------------|------|-------|------|------|----|----|--|---|--------------------------------------|---|
|                                                                                                                                                                            |      |       |      |      |    |    |  | 2 | KYNTDC[330]VQGLTHSK                  | 2 |
|                                                                                                                                                                            |      |       |      |      |    |    |  | 3 | AC[339]VIHGTDLKDFTEIQIDEILQNHTEIVFAR | 1 |
|                                                                                                                                                                            |      |       |      |      |    |    |  | 2 | VLGFC[330]HYLPEEQFPK                 | 3 |
|                                                                                                                                                                            |      |       |      |      |    |    |  | 2 | IISAHGC[330]K                        | 2 |
|                                                                                                                                                                            |      |       |      |      |    |    |  | 2 | AC[330]VIHGTDLK                      | 1 |
|                                                                                                                                                                            |      |       |      |      |    |    |  | 2 | M[147]SVEEVC[330]R                   | 1 |
|                                                                                                                                                                            |      |       |      |      |    |    |  | 2 | C[330]STILLQGK                       | 1 |
|                                                                                                                                                                            |      |       |      |      |    |    |  | 2 | SPDC[339]THDNPLETR                   | 1 |
|                                                                                                                                                                            |      |       |      |      |    |    |  | 1 | C[330]STILLQGK                       | 1 |
|                                                                                                                                                                            |      |       |      |      |    |    |  | 3 | AC[330]VIHGTDLKDFTEIQIDEILQNHTEIVFAR | 1 |
|                                                                                                                                                                            |      |       |      |      |    |    |  | 2 | VLGFC[339]HYLPEEQFPK                 | 1 |
|                                                                                                                                                                            |      |       |      |      |    |    |  | 1 | IISAHGC[330]K                        | 1 |
|                                                                                                                                                                            |      |       |      |      |    |    |  | 2 | YNTDC[330]VQGLTHSK                   | 1 |
|                                                                                                                                                                            |      |       |      |      |    |    |  | 2 | IISAHGC[339]K                        | 2 |
|                                                                                                                                                                            |      |       |      |      |    |    |  | 2 | KYNTDC[339]VQGLTHSK                  | 2 |
|                                                                                                                                                                            |      |       |      |      |    |    |  | 2 | M[147]SVEEVC[330]RK                  | 1 |
|                                                                                                                                                                            |      |       |      |      |    |    |  | 2 | SPDC[330]THDNPLETR                   | 1 |
|                                                                                                                                                                            |      |       |      |      |    |    |  | 3 | DSAQRDDM[147]IFEDC[330]GDVPSEPKER    | 1 |
|                                                                                                                                                                            |      |       |      |      |    |    |  | 2 | EGKPC[330]IIIK                       | 1 |
|                                                                                                                                                                            |      |       |      |      |    |    |  | 3 | YKDSAQRDDM[147]IFEDC[339]GDVPSEPK    | 1 |
|                                                                                                                                                                            |      |       |      |      |    |    |  | 1 | YNPNVLPVQC[330]TGK                   | 1 |
|                                                                                                                                                                            |      |       |      |      |    |    |  | 3 | YKDSAQRDDM[147]IFEDC[330]GDVPSEPK    | 1 |
|                                                                                                                                                                            |      |       |      |      |    |    |  | 2 | YNPNVLPVQC[330]TGK                   | 1 |
|                                                                                                                                                                            |      |       |      |      |    |    |  | 1 | VAPPGLTQIPQIK                        | 1 |
|                                                                                                                                                                            |      |       |      |      |    |    |  | 2 | YNPNVLPVQC[339]TGK                   | 1 |
|                                                                                                                                                                            |      |       |      |      |    |    |  | 3 | DEDAENLGNFVMFPANGNIDLMYFPYYGKK       | 1 |
|                                                                                                                                                                            |      |       |      |      |    |    |  | 2 | VINFYAGANQSM[147]NVTC[330]AGKR       | 1 |
| AT1A3_HUMAN (P13637) Sodium/potassium-transporting ATPase alpha-3 chain (EC 3.6.3.9) (Sodium pump 3) (Na <sup>+</sup> /K <sup>+</sup> ATPase 3) (Alpha(III)) [MASS=111734] | 1.00 | 12.93 | 0.45 | 0.61 | 23 | 10 |  |   |                                      |   |
| AT1B1_HUMAN (P05026) Sodium/potassium-transporting ATPase subunit beta-1 (Sodium/potassium-dependent ATPase beta-1 subunit) [MASS=35061]                                   | 1.00 | 27.06 | 0.47 | 0.27 | 7  | 5  |  |   |                                      |   |
| AT1B2_HUMAN (P14415) Sodium/potassium-transporting ATPase subunit beta-2 (Sodium/potassium-dependent ATPase beta-2 subunit) [MASS=33326]                                   | 0.00 | 17.24 | 1.23 | 0.00 | 1  | 2  |  |   |                                      |   |

|                                                                                                                                                                                                                                                                                  |      |       |      |      |   |   |   |                                                 |   |
|----------------------------------------------------------------------------------------------------------------------------------------------------------------------------------------------------------------------------------------------------------------------------------|------|-------|------|------|---|---|---|-------------------------------------------------|---|
| AT2A2_HUMAN (P16615)<br>Sarcoplasmic/endoplasmic reticulum calcium ATPase 2 (EC 3.6.3.8) (Calcium pump 2) (SERCA2) (SR Ca(2+)-ATPase 2) (Calcium-transporting ATPase sarcoplasmic reticulum type, slow twitch skeletal muscle isoform) (Endoplasmic reticulum cla [MASS=114756]) | 1.00 | 4.70  | 1.04 | 0.06 | 4 | 4 | 2 | ANAC[330]NSVIK                                  | 1 |
|                                                                                                                                                                                                                                                                                  |      |       |      |      |   |   | 2 | NYLEPGKEC[330]VQPATK                            | 1 |
|                                                                                                                                                                                                                                                                                  |      |       |      |      |   |   | 3 | C[330]LALATHDNPLR                               | 1 |
|                                                                                                                                                                                                                                                                                  |      |       |      |      |   |   | 2 | SM[147]SVYC[330]TPNKPSR                         | 1 |
|                                                                                                                                                                                                                                                                                  |      |       |      |      |   |   | 2 | SM[147]SVYC[339]TPNKPSR                         | 1 |
| AT2B1_HUMAN (P20020) Plasma membrane calcium-transporting ATPase 1 (EC 3.6.3.8) (PMCA1) (Plasma membrane calcium pump isoform 1) (Plasma membrane calcium ATPase isoform 1) [MASS=138754]                                                                                        | 0.25 | 3.34  | 0.57 | 0.00 | 1 | 2 | 2 | KIQESYGDVYGIC[330]TK                            | 1 |
|                                                                                                                                                                                                                                                                                  |      |       |      |      |   |   | 2 | AGLLM[147]SAITVILVLYFVIDTFWVQKR                 | 1 |
| AT2B2_HUMAN (Q01814) Plasma membrane calcium-transporting ATPase 2 (EC 3.6.3.8) (PMCA2) (Plasma membrane calcium pump isoform 2) (Plasma membrane calcium ATPase isoform 2) [MASS=136875]                                                                                        | 1.00 | 10.94 | 0.55 | 0.35 | 3 | 7 | 3 | NESSHGGEFGC[330]TM[147]EELRSLM[147]ELR          | 1 |
|                                                                                                                                                                                                                                                                                  |      |       |      |      |   |   | 2 | IKETYGDTEAIC[330]R                              | 1 |
|                                                                                                                                                                                                                                                                                  |      |       |      |      |   |   | 3 | M[147]VTGDNINTARAIAIKC[339]GIIHPGEDFLC[330]LEGK | 1 |
|                                                                                                                                                                                                                                                                                  |      |       |      |      |   |   | 3 | TEC[330]GLLGFVLDLKQDYEPVR                       | 1 |
|                                                                                                                                                                                                                                                                                  |      |       |      |      |   |   | 3 | KQIFGQNFIPPKK                                   | 3 |
| AT2B3_HUMAN (Q16720) Plasma membrane calcium-transporting ATPase 3 (EC 3.6.3.8) (PMCA3) (Plasma membrane calcium pump isoform 3) (Plasma membrane calcium ATPase isoform 3) [MASS=134258]                                                                                        | *    | 2.79  | *    | *    | * | 2 | 3 | IDESSLTGESDQVRKSVDK                             | 1 |
|                                                                                                                                                                                                                                                                                  |      |       |      |      |   |   | 2 | C[330]GIIHPGEDFLC[330]LEGK                      | 1 |
| AT2B4_HUMAN (P23634) Plasma membrane calcium-transporting ATPase 4 (EC 3.6.3.8) (PMCA4) (Plasma membrane calcium pump isoform 4) (Plasma membrane calcium ATPase isoform 4) [MASS=137919]                                                                                        | 1.00 | 4.19  | 0.46 | 0.02 | 3 | 3 | 3 | AKKQDGAVAM[147]EMQPLK                           | 1 |
|                                                                                                                                                                                                                                                                                  |      |       |      |      |   |   | 2 | YDLLPADGVLIQANDLK                               | 1 |
|                                                                                                                                                                                                                                                                                  |      |       |      |      |   |   | 3 | QVGNKTEC[330]ALLGFVTDLKQDYQAVR                  | 1 |
|                                                                                                                                                                                                                                                                                  |      |       |      |      |   |   | 3 | TEC[330]ALLGFVTDLKQDYQAVR                       | 1 |
|                                                                                                                                                                                                                                                                                  |      |       |      |      |   |   | 2 | SM[147]STVIR                                    | 1 |
|                                                                                                                                                                                                                                                                                  |      |       |      |      |   |   | 3 | TEC[339]ALLGFVTDLKQDYQAVR                       | 1 |
| AT5F1_HUMAN (P24539) ATP synthase B chain, mitochondrial precursor (EC 3.6.3.14) [MASS=28908]                                                                                                                                                                                    | 0.60 | 2.34  | 1.38 | 0.00 | 1 | 1 | 1 | C[339]IADLK                                     | 2 |



|                                                                                                                                                                                                                          |      |       |      |      |   |   |   |                                       |   |
|--------------------------------------------------------------------------------------------------------------------------------------------------------------------------------------------------------------------------|------|-------|------|------|---|---|---|---------------------------------------|---|
| AT8A1_HUMAN (Q9Y2Q0) Probable phospholipid-transporting ATPase 1A (EC 3.6.3.1) (Chromaffin granule ATPase II) (ATPase class I type 8A member 1) [MASS=131368]                                                            | *    | 1.12  | *    | *    | * | 1 | 2 | AVYQRASTSVQNR                         | 1 |
| ATAD2_HUMAN (Q6PL18) ATPase family AAA domain-containing protein 2 [MASS=158553]                                                                                                                                         | *    | 1.44  | *    | *    | * | 2 | 2 | EVETYHR                               | 1 |
|                                                                                                                                                                                                                          |      |       |      |      |   |   | 2 | NRAINRC[339]LPLNFR                    | 1 |
| ATG4B_HUMAN (Q9Y4P1) Cysteine protease ATG4B (EC 3.4.22.-) (Autophagy-related protein 4 homolog B) (hAPG4B) (Autophagin-1) (Autophagy-related cysteine endopeptidase 1) (AUT-like 1 cysteine endopeptidase) [MASS=44309] | 0.00 | 9.16  | 0.73 | 0.00 | 1 | 2 | 3 | HC[339]FM[147]M[147]PQSLGVIGGK        | 1 |
|                                                                                                                                                                                                                          |      |       |      |      |   |   | 2 | NFPAIGGTGPTSDTGWGC[330]M[147]LR       | 1 |
| ATG7_HUMAN (O95352) Autophagy-related protein 7 (APG7-like) (Ubiquitin-activating enzyme E1-like protein) (hAGP7) [MASS=77959]                                                                                           | *    | 2.42  | *    | *    | * | 1 | 3 | GGMGPRM[147]VNLSEC[339]M[147]DPK      | 1 |
| ATL1_HUMAN (Q8N6G6) ADAMTS-like protein 1 precursor (ADAMTSL-1) (Punctin-1) [MASS=58416]                                                                                                                                 | *    | 6.48  | *    | *    | * | 2 | 3 | C[330]LSSKSC[339]EGR                  | 1 |
|                                                                                                                                                                                                                          |      |       |      |      |   |   | 3 | MEC[330]C[330]RRATPGTLLLFLAFLLLSSR    | 1 |
| ATM_HUMAN (Q13315) Serine-protein kinase ATM (EC 2.7.11.1) (Ataxia telangiectasia mutated) (A-T, mutated) [MASS=350642]                                                                                                  | *    | 4.06  | *    | *    | * | 5 | 3 | EETGISLQDLLLEIYRSIGEPDSL YGC[330]GGGK | 1 |
|                                                                                                                                                                                                                          |      |       |      |      |   |   | 3 | FLDFFSKAIQC[330]ARQEK                 | 1 |
|                                                                                                                                                                                                                          |      |       |      |      |   |   | 3 | ISM DHPHHTLFIILALANANRDEFLTK          | 1 |
|                                                                                                                                                                                                                          |      |       |      |      |   |   | 3 | PEDETELHPTLNADDQEC[330]K              | 1 |
|                                                                                                                                                                                                                          |      |       |      |      |   |   | 3 | DQMVDIMRASQDNPQDGIM[147]VKLVVNLQLSK   | 1 |
| ATN1_HUMAN (P54259) Atrophin-1 (Dentatorubral-pallidolulsian atrophy protein) [MASS=124773]                                                                                                                              | *    | 1.18  | *    | *    | * | 1 | 3 | VEEASTPKV NKQGR                       | 1 |
| ATP5E_HUMAN (P56381) ATP synthase epsilon chain, mitochondrial (EC 3.6.3.14) [MASS=5649]                                                                                                                                 | 1.00 | 14.00 | 1.74 | 0.02 | 2 | 1 | 2 | YSQIC[339]AK                          | 1 |
|                                                                                                                                                                                                                          |      |       |      |      |   |   | 2 | YSQIC[330]AK                          | 1 |
| ATP8_HUMAN (P03928) ATP synthase protein 8 (EC 3.6.3.14) (ATPase subunit 8) (A6L) [MASS=7992]                                                                                                                            | 1.00 | 16.18 | 1.15 | 0.05 | 2 | 1 | 2 | IC[339]SLHSLPPQS                      | 1 |
|                                                                                                                                                                                                                          |      |       |      |      |   |   | 1 | IC[339]SLHSLPPQS                      | 1 |
| ATPA_HUMAN (P25705) ATP synthase alpha chain, mitochondrial precursor (EC 3.6.3.14) [MASS=59750]                                                                                                                         | 1.00 | 9.04  | 1.47 | 0.02 | 2 | 3 | 2 | LYC[339]IYVAIGQK                      | 1 |
|                                                                                                                                                                                                                          |      |       |      |      |   |   | 1 | LYC[330]IYVAIGQK                      | 1 |
|                                                                                                                                                                                                                          |      |       |      |      |   |   | 2 | FENAFLSHVVSQHQALLGTIR                 | 1 |
|                                                                                                                                                                                                                          |      |       |      |      |   |   | 2 | RPPGREAYPGDVFYLHSR                    | 1 |

|                                                                                                                                                                              |      |       |      |      |   |   |   |                                  |   |
|------------------------------------------------------------------------------------------------------------------------------------------------------------------------------|------|-------|------|------|---|---|---|----------------------------------|---|
| ATPB_HUMAN (P06576) ATP synthase beta chain, mitochondrial precursor (EC 3.6.3.14) [MASS=56559]                                                                              | 0.00 | 6.81  | *    | *    | * | 2 | 2 | VAAAPASGALRR                     | 1 |
|                                                                                                                                                                              |      |       |      |      |   |   | 3 | SLQDIILGMDDELSEEDKLTVSR          | 1 |
| ATPG_HUMAN (P36542) ATP synthase gamma chain, mitochondrial precursor (EC 3.6.3.14) [MASS=32996]                                                                             | 1.00 | 10.40 | 1.38 | 0.03 | 3 | 2 | 2 | GLC[330]GAIHSSIAK                | 1 |
|                                                                                                                                                                              |      |       |      |      |   |   | 2 | QAVITKELIEIISGAAALD              | 1 |
|                                                                                                                                                                              |      |       |      |      |   |   | 2 | GLC[339]GAIHSSIAK                | 2 |
| ATRN_HUMAN (O75882) Attractin precursor (Mahogany homolog) (DPPT-L) [MASS=158536]                                                                                            | *    | 2.73  | *    | *    | * | 2 | 3 | DKIYM[147]YGGKIDSTGNVTNELR       | 1 |
|                                                                                                                                                                              |      |       |      |      |   |   | 3 | YGHSLALYKDKIYMYGGK               | 1 |
| ATR_HUMAN (Q13535) Serine/threonine-protein kinase ATR (EC 2.7.11.1) (Ataxia telangiectasia and Rad3-related protein) (FRAP-related protein 1) [MASS=301365]                 | *    | 1.44  | *    | *    | * | 3 | 3 | M[147]KEAYTHAQISR                | 1 |
|                                                                                                                                                                              |      |       |      |      |   |   | 2 | KMALNSLM[147]SLM[147]KLM[147]GPK | 1 |
|                                                                                                                                                                              |      |       |      |      |   |   | 2 | THVLDIEQR                        | 1 |
| ATS10_HUMAN (Q9H324) ADAMTS-10 precursor (EC 3.4.24.-) (A disintegrin and metalloproteinase with thrombospondin motifs 10) (ADAM-TS 10) (ADAM-TS10) (Fragment) [MASS=118072] | *    | 1.58  | *    | *    | * | 1 | 2 | HRSC[339]NTDDC[330]PPGSQDFR      | 1 |
| ATS17_HUMAN (Q8TE56) ADAMTS-17 precursor (EC 3.4.24.-) (A disintegrin and metalloproteinase with thrombospondin motifs 17) (ADAM-TS 17) (ADAM-TS17) [MASS=121099]            | *    | 2.47  | *    | *    | * | 2 | 2 | VRPDDVHLPLPAAPGPR                | 1 |
|                                                                                                                                                                              |      |       |      |      |   |   | 2 | ESPLLVADR                        | 1 |
| ATS18_HUMAN (Q8TE60) ADAMTS-18 precursor (EC 3.4.24.-) (A disintegrin and metalloproteinase with thrombospondin motifs 18) (ADAM-TS 18) (ADAM-TS18) [MASS=135140]            | *    | 1.47  | *    | *    | * | 1 | 3 | GDNSTC[339]KFKYKGLYLNQHK         | 1 |
| ATS20_HUMAN (P59510) ADAMTS-20 precursor (EC 3.4.24.-) (A disintegrin and metalloproteinase with thrombospondin motifs 20) (ADAM-TS 20) (ADAM-TS20) [MASS=214655]            | *    | 1.15  | *    | *    | * | 1 | 3 | LVIC[339]QFPNGQILEDHNC[330]EIVNK | 1 |
| ATS9_HUMAN (Q9P2N4) ADAMTS-9 precursor (EC 3.4.24.-) (A disintegrin and metalloproteinase with thrombospondin motifs 9) (ADAM-TS 9) (ADAM-TS9) [MASS=216556]                 | *    | 2.53  | *    | *    | * | 3 | 3 | SNGERFPDLSC[330]EILDK            | 1 |
|                                                                                                                                                                              |      |       |      |      |   |   | 2 | GEFLLNGNFVVTM[147]AKREIR         | 1 |
|                                                                                                                                                                              |      |       |      |      |   |   | 2 | ESDQLTVSDQRC[339]DR              | 1 |

|                                                                                                                                                                                                                                                                            |      |       |       |      |   |   |   |                                          |   |
|----------------------------------------------------------------------------------------------------------------------------------------------------------------------------------------------------------------------------------------------------------------------------|------|-------|-------|------|---|---|---|------------------------------------------|---|
| AUMH_HUMAN (Q13825) Methylglutaconyl-CoA hydratase, mitochondrial precursor (EC 4.2.1.18) (AU-specific RNA-binding enoyl-CoA hydratase) (AU-binding protein/enoyl-CoA hydratase) [MASS=35608]                                                                              | 0.99 | 16.52 | 1.29  | 0.00 | 1 | 2 | 3 | MAAAVAAAPGALGSLHAGGAR                    | 1 |
|                                                                                                                                                                                                                                                                            |      |       |       |      |   |   | 3 | AVINDIANLPVPTIAAIDGLALGGGLELALAC[339]DIR | 1 |
| AZI1_HUMAN (Q9UPN4) 5-azacytidine-induced protein 1 (Pre-acrosome localization protein 1) (Centrosomal protein of 131 kDa) (Cep131 protein) [MASS=122060]                                                                                                                  | 0.51 | 7.66  | 3.00  | 0.00 | 1 | 5 | 3 | GAVGNC[339]VTTMVHNRYTPSER                | 1 |
|                                                                                                                                                                                                                                                                            |      |       |       |      |   |   | 3 | AATC[339]EGSESSGFGK                      | 1 |
|                                                                                                                                                                                                                                                                            |      |       |       |      |   |   | 3 | RKVLEATGPGGSQAINNLR                      | 1 |
|                                                                                                                                                                                                                                                                            |      |       |       |      |   |   | 2 | LRDKYEAELSELEQSER                        | 1 |
|                                                                                                                                                                                                                                                                            |      |       |       |      |   |   | 2 | ASTAERGPPENPR                            | 1 |
| B3A4_HUMAN (Q96Q91) Anion exchange protein 4 (Anion exchanger 4) (Solute carrier family 4 member 9) (Sodium bicarbonate cotransporter 5) [MASS=108247]                                                                                                                     | *    | 3.76  | *     | *    | * | 2 | 3 | ETGSSSASLLLDLDM[147]GEM[147]PSITLSTHLHHR | 1 |
|                                                                                                                                                                                                                                                                            |      |       |       |      |   |   | 2 | VESLSPELR                                | 1 |
| BAP29_HUMAN (Q9UHQ4) B-cell receptor-associated protein 29 (BCR-associated protein Bap29) [MASS=28320]                                                                                                                                                                     | 0.75 | 11.62 | 1.08  | 0.00 | 1 | 2 | 2 | SHGKDEEC[339]VLEAENKK                    | 1 |
|                                                                                                                                                                                                                                                                            |      |       |       |      |   |   | 2 | GVLKTQAENTNK                             | 1 |
| BARH1_HUMAN (Q9BZE3) BarH-like 1 homeobox protein [MASS=35074]                                                                                                                                                                                                             | 0.00 | 14.07 | 0.42  | 0.00 | 1 | 2 | 2 | TVTSSFLIRDILADC[330]K                    | 1 |
|                                                                                                                                                                                                                                                                            |      |       |       |      |   |   | 3 | PLVPRILIHGLQGASEPPPLPLAGVLP              | 1 |
| BASI_HUMAN (P35613) Basigin precursor (Leukocyte activation antigen M6) (Collagenase stimulatory factor) (Extracellular matrix metalloproteinase inducer) (EMMPRIN) (5F7) (Tumor cell-derived collagenase stimulatory factor) (TCSF) (OK blood group antigen) [MASS=42200] | 0.99 | 9.61  | 0.81  | 0.00 | 1 | 2 | 3 | VKAVKSSEHINEGETAM[147]LVC[330]K          | 1 |
|                                                                                                                                                                                                                                                                            |      |       |       |      |   |   | 2 | SSEHINEGETAM[147]LVC[330]K               | 1 |
| BAT5_HUMAN (O95870) Protein BAT5 (HLA-B-associated transcript 5) (Protein G5) [MASS=63112]                                                                                                                                                                                 | *    | 2.87  | *     | *    | * | 1 | 2 | LLAC[330]DGNEIDTMFVDR                    | 1 |
| BC11B_HUMAN (Q9C0K0) B-cell lymphoma/leukemia 11B (B-cell CLL/lymphoma 11B) (Radiation-induced tumor suppressor gene 1 protein) (hRit1) (COUP-TF-interacting protein 2) [MASS=95519]                                                                                       | 0.00 | 3.91  | 40.43 | 0.00 | 1 | 1 | 2 | QENIAGPC[339]RPAQLPAVAPIAASSHPHSSVITSPLR | 1 |
| BCAR3_HUMAN (O75815) Breast cancer anti-estrogen resistance protein 3 (SH2 domain-containing protein 3B) (Novel SH2-containing protein 2) [MASS=92565]                                                                                                                     | *    | 9.45  | *     | *    | * | 4 | 3 | SC[339]DDFSHM[147]GTLPHSKSPR             | 1 |
|                                                                                                                                                                                                                                                                            |      |       |       |      |   |   | 3 | RLSLTM[147]GGVQAR                        | 1 |
|                                                                                                                                                                                                                                                                            |      |       |       |      |   |   | 3 | ESTC[339]VPPNNVSVPLLMPLVTLMER            | 1 |
|                                                                                                                                                                                                                                                                            |      |       |       |      |   |   | 3 | GPPPIRSC[330]DDFSHMGTLPKSPR              | 1 |

|                                                                                                                                                                                                                                                                              |      |       |      |      |   |   |   |                                        |   |
|------------------------------------------------------------------------------------------------------------------------------------------------------------------------------------------------------------------------------------------------------------------------------|------|-------|------|------|---|---|---|----------------------------------------|---|
| BCDO1_HUMAN (Q9HAY6) Beta,beta-carotene 15,15'-monooxygenase (EC 1.14.99.36) (Beta-carotene dioxygenase 1) [MASS=62637]                                                                                                                                                      | *    | 3.11  | *    | *    | * | 1 | 2 | LPFLLLILDAKSFTELAR                     | 1 |
| BCL6B_HUMAN (Q8N143) B-cell CLL/lymphoma 6 member B protein (Bcl6-associated zinc finger protein) (Zinc finger protein 62) [MASS=51618]                                                                                                                                      | 0.00 | 6.25  | 0.98 | 0.00 | 1 | 1 | 3 | YKYIVLNSQASQAGSLVGERSSGQPC[330]PQAR    | 1 |
| BCN1_HUMAN (Q14457) Beclin-1 (Coiled-coil myosin-like BCL2-interacting protein) (Protein GT197) [MASS=51896]                                                                                                                                                                 | 0.87 | 13.11 | 0.68 | 0.00 | 1 | 3 | 2 | RC[330]LEILEQMNEEDDSEQLQMELEK          | 1 |
|                                                                                                                                                                                                                                                                              |      |       |      |      |   |   | 3 | LKKTNVFNATFHIWHSGQFGTINNFR             | 1 |
|                                                                                                                                                                                                                                                                              |      |       |      |      |   |   | 3 | ELPLYC[339]SGGLR                       | 1 |
| BCOR_HUMAN (Q6W2J9) BCoR protein (BCL-6 corepressor) [MASS=192187]                                                                                                                                                                                                           | *    | 1.25  | *    | *    | * | 1 | 2 | SLSSTSAGGKKQAQPSC[339]APASR            | 1 |
| BGAT_HUMAN (P16442) Histo-blood group ABO system transferase (NAGAT) [Includes: Glycoprotein-fucosylgalactoside alpha-N-acetylgalactosaminyltransferase (EC 2.4.1.40) (Fucosylglycoprotein alpha-N-acetylgalactosaminyltransferase) (Histo-blood group A trans) [MASS=40934] | *    | 6.21  | *    | *    | * | 1 | 3 | PMILFLIMLVLVFGYGVLSR                   | 2 |
| BIG1_HUMAN (Q9Y6D6) Brefeldin A-inhibited guanine nucleotide-exchange protein 1 (Brefeldin A-inhibited GEP 1) (p200 ARF-GEP1) (p200 ARF guanine nucleotide exchange factor) [MASS=208708]                                                                                    | 0.00 | 0.81  | 3.07 | 0.00 | 1 | 1 | 3 | GWFPILFELSC[339]IINR                   | 1 |
| BIG2_HUMAN (Q9Y6D5) Brefeldin A-inhibited guanine nucleotide-exchange protein 2 (Brefeldin A-inhibited GEP 2) [MASS=202092]                                                                                                                                                  | 0.00 | 3.14  | *    | *    | * | 3 | 3 | AHASYYPYLC[339]EIMQFDLPELRAVLR         | 1 |
|                                                                                                                                                                                                                                                                              |      |       |      |      |   |   | 2 | FC[330]GKYVSRPR                        | 1 |
|                                                                                                                                                                                                                                                                              |      |       |      |      |   |   | 2 | FNKEVMYAYVDQLDFC[330]JEK               | 1 |
| BIRC1_HUMAN (Q13075) Baculoviral IAP repeat-containing protein 1 (Neuronal apoptosis inhibitory protein) [MASS=159581]                                                                                                                                                       | *    | 2.85  | *    | *    | * | 2 | 3 | ESLENISENDDYLKHQPEISLQMQLLR            | 1 |
|                                                                                                                                                                                                                                                                              |      |       |      |      |   |   | 3 | WQEGDDPLDDHTR                          | 1 |
| BIRC6_HUMAN (Q9NR09) Baculoviral IAP repeat-containing protein 6 (Ubiquitin-conjugating BIR-domain enzyme apollon) [MASS=527606]                                                                                                                                             | *    | 2.40  | *    | *    | * | 6 | 3 | LQWEIVANVLEDTVKDLEELGANPC[330]LTNSKSEK | 1 |
|                                                                                                                                                                                                                                                                              |      |       |      |      |   |   | 2 | MLSETSNPEDLIQTSSTEQLR                  | 1 |
|                                                                                                                                                                                                                                                                              |      |       |      |      |   |   | 2 | GYSLASLLAK                             | 1 |
|                                                                                                                                                                                                                                                                              |      |       |      |      |   |   | 2 | IRLHTGLLLVLQLC[339]GGER                | 1 |
|                                                                                                                                                                                                                                                                              |      |       |      |      |   |   | 2 | SLFSTTPLTTDDGVLLR                      | 1 |
|                                                                                                                                                                                                                                                                              |      |       |      |      |   |   | 3 | SLFSTTPLTTDDGVLLRR                     | 1 |

|                                                                                                                                                                                                                                                                              |      |       |      |      |   |   |                  |                                                                                               |                  |
|------------------------------------------------------------------------------------------------------------------------------------------------------------------------------------------------------------------------------------------------------------------------------|------|-------|------|------|---|---|------------------|-----------------------------------------------------------------------------------------------|------------------|
| BIRC7_HUMAN (Q96CA5) Baculoviral IAP repeat-containing protein 7 (Kidney inhibitor of apoptosis protein) (KIAP) (Melanoma inhibitor of apoptosis protein) (ML-IAP) (Livin) [MASS=32798]                                                                                      | 0.00 | 10.40 | 1.38 | 0.00 | 1 | 2 | 2                | SLGSPVLGLDTC[339]R<br>AWWWLEPPGARDVEAQLR                                                      | 1<br>1           |
| BKLH5_HUMAN (Q96NJ5) BTB and kelch domain-containing protein 5 [MASS=70352]                                                                                                                                                                                                  | 0.00 | 2.58  | 1.32 | 0.00 | 1 | 1 | 2                | SDGILC[339]DITLIAEEQK                                                                         | 1                |
| BPIL3_HUMAN (Q8NFQ5) Bactericidal/permeability-increasing protein-like 3 precursor [MASS=49716]                                                                                                                                                                              | 0.00 | 4.42  | 1.07 | 0.00 | 1 | 1 | 2                | VLPGLMC[330]PAIDAVLVYVNRK                                                                     | 1                |
| BPL1_HUMAN (P50747) Biotin--protein ligase (EC 6.3.4.-) (Biotin apo-protein ligase) [Includes: Biotin--[methylmalonyl-CoA-carboxytransferase] ligase (EC 6.3.4.9); Biotin--[propionyl-CoA-carboxylase [ATP-hydrolyzing]] ligase (EC 6.3.4.10) (Holocarboxylase) [MASS=80759] | 0.00 | 2.48  | 2.19 | 0.00 | 1 | 1 | 3                | YEVLRREILTTLGLSC[339]DMK                                                                      | 1                |
| BRAC_HUMAN (O15178) Brachyury protein (T protein) [MASS=47443]                                                                                                                                                                                                               | 0.00 | 6.21  | 1.62 | 0.00 | 1 | 1 | 3                | MITSHC[339]FPETQFIAVTAYQNEEITALK                                                              | 1                |
| BRCA2_HUMAN (P51587) Breast cancer type 2 susceptibility protein (Fanconi anemia group D1 protein) [MASS=384223]                                                                                                                                                             | *    | 2.17  | *    | *    | * | 4 | 2<br>3<br>2<br>3 | PESKSGLLTLFAGDFSVFSASPK<br>TLVLC[330]VSDIISLSANISSETSSNK<br>FIYAIHDETSYK<br>EQGTSEITSFESHQWAK | 1<br>1<br>1<br>1 |
| BRD1_HUMAN (O95696) Bromodomain-containing protein 1 (BR140-like protein) [MASS=119519]                                                                                                                                                                                      | *    | 1.61  | *    | *    | * | 2 | 1<br>2           | M[147]EPVK<br>DQGGVVLQRARR                                                                    | 1<br>1           |
| BRWD2_HUMAN (Q9BZH6) Bromodomain and WD repeat domain-containing protein 2 (WD repeat protein 11) [MASS=136684]                                                                                                                                                              | 0.00 | 3.51  | 0.55 | 0.00 | 1 | 2 | 2<br>3           | WVDHLC[330]SPQVNQK<br>LVATNM[147]IANGKLAEGVQLLC[339]LIDKAADAC[339]R                           | 1<br>1           |
| BTBD9_HUMAN (Q96Q07) BTB/POZ domain-containing protein 9 [MASS=69187]                                                                                                                                                                                                        | *    | 3.76  | *    | *    | * | 1 | 2                | GELKSALLDGDGTQNYDLDHGFSR                                                                      | 1                |
| BUB1_HUMAN (O43683) Mitotic checkpoint serine/threonine-protein kinase BUB1 (EC 2.7.11.1) (hBUB1) (BUB1A) [MASS=122374]                                                                                                                                                      | *    | 0.92  | *    | *    | * | 1 | 2                | FSPIQEKSPK                                                                                    | 1                |

|                                                                                                                                                                                                                                                                              |      |       |      |      |   |   |   |                                          |   |
|------------------------------------------------------------------------------------------------------------------------------------------------------------------------------------------------------------------------------------------------------------------------------|------|-------|------|------|---|---|---|------------------------------------------|---|
| BWR1B_HUMAN (Q8N1D0) Beckwith-Wiedemann syndrome chromosome region 1 candidate protein B (p27-Beckwith-Wiedemann region 1 B) (p27-BWR1B) (Organic cation transporter-like protein 2-antisense) (Solute carrier family 22 member 18 antisense) (Solute carrier [MASS=27218])  | 0.00 | 6.72  | 1.75 | 0.00 | 1 | 1 | 2 | AGGC[339]SAFPLLLSQLGAR                   | 1 |
| C163B_HUMAN (Q9NR16) Scavenger receptor cysteine-rich type 1 protein M160 precursor (CD163 antigen-like 1) (CD163b antigen) [MASS=159263]                                                                                                                                    | *    | 0.89  | *    | *    | * | 1 | 2 | NAAVVC[330]KQLGC[339]GK                  | 1 |
| C1QBP_HUMAN (Q07021) Complement component 1 Q subcomponent-binding protein, mitochondrial precursor (Glycoprotein gC1qBP) (C1qBP) (GC1q-R protein) (Hyaluronan-binding protein 1) (Mitochondrial matrix protein p32) (p33) [MASS=31362]                                      | 1.00 | 14.54 | 1.44 | 0.00 | 2 | 2 | 3 | ALVLDC[330]HYPEDEVGQEDEAESDIFSIR         | 1 |
|                                                                                                                                                                                                                                                                              |      |       |      |      |   |   | 2 | PFGLLSVRAGSERR                           | 1 |
|                                                                                                                                                                                                                                                                              |      |       |      |      |   |   | 3 | ALVLDC[339]HYPEDEVGQEDEAESDIFSIR         | 1 |
| C560_HUMAN (Q99643) Succinate dehydrogenase cytochrome b560 subunit, mitochondrial precursor (Integral membrane protein CII-3) (QPs1) (QPs-1) (Succinate dehydrogenase complex subunit C) (Succinate-ubiquinone oxidoreductase cytochrome B large subunit) (CY [MASS=18610]) | 1.00 | 7.69  | 1.12 | 0.14 | 3 | 1 | 3 | SLC[330]LGPALIHAK                        | 1 |
|                                                                                                                                                                                                                                                                              |      |       |      |      |   |   | 2 | SLC[330]LGPALIHAK                        | 1 |
|                                                                                                                                                                                                                                                                              |      |       |      |      |   |   | 2 | SLC[339]LGPALIHAK                        | 1 |
| CAC1E_HUMAN (Q15878) Voltage-dependent R-type calcium channel subunit alpha-1E (Voltage-gated calcium channel subunit alpha Cav2.3) (Calcium channel, L type, alpha-1 polypeptide, isoform 6) (Brain calcium channel II) (BII) [MASS=261728]                                 | 0.00 | 5.19  | 1.24 | 0.00 | 1 | 6 | 3 | ATTESTSVTVAIPDVDPLVDSTVVHISNKTDGEASPLK   | 1 |
|                                                                                                                                                                                                                                                                              |      |       |      |      |   |   | 3 | DHELRGNHGAK                              | 1 |
|                                                                                                                                                                                                                                                                              |      |       |      |      |   |   | 1 | RSYHSSLR                                 | 1 |
|                                                                                                                                                                                                                                                                              |      |       |      |      |   |   | 3 | YLNIAFTM[147]VFSLEC[339]VLK              | 1 |
|                                                                                                                                                                                                                                                                              |      |       |      |      |   |   | 2 | QRQLEEQKNAPMFQR                          | 1 |
|                                                                                                                                                                                                                                                                              |      |       |      |      |   |   | 3 | YYSAPC[330]TYELALKYLNIAFTMVFSLEC[339]VLK | 1 |
| CAC1F_HUMAN (O60840) Voltage-dependent L-type calcium channel subunit alpha-1F (Voltage-gated calcium channel subunit alpha Cav1.4) [MASS=219494]                                                                                                                            | *    | 3.97  | *    | *    | * | 3 | 3 | GTPTSSQPSVPPQAGSNTHRRGSGALIFTIPEEGNSQPK  | 1 |
|                                                                                                                                                                                                                                                                              |      |       |      |      |   |   | 3 | RLVAM[147]NM[147]PLNSDGTVTFNATLFLVVRTSLK | 1 |
|                                                                                                                                                                                                                                                                              |      |       |      |      |   |   | 2 | LLPPTPAGRK                               | 1 |

|                                                                                                                                                                                                               |      |      |      |      |   |   |                  |                                                                                                              |                  |
|---------------------------------------------------------------------------------------------------------------------------------------------------------------------------------------------------------------|------|------|------|------|---|---|------------------|--------------------------------------------------------------------------------------------------------------|------------------|
| CAC1G_HUMAN (O43497) Voltage-dependent T-type calcium channel subunit alpha-1G (Voltage-gated calcium channel subunit alpha Cav3.1) (Cav3.1c) (NBR13) [MASS=262470]                                           | 0.00 | 0.63 | 0.58 | 0.00 | 1 | 1 | 2                | C[330]LALVSLGEHPELRK                                                                                         | 1                |
| CAC2D_HUMAN (P54289) Dihydropyridine-sensitive L-type calcium channel subunits alpha-2/delta precursor [Contains: L-type calcium channel subunit alpha-2; L-type calcium channel subunit delta] [MASS=123183] | 0.99 | 3.02 | 0.67 | 0.00 | 1 | 2 | 2<br>2           | NQLILGVM[147]GVDVSLIEDIK<br>KTPNNPSC[330]NADLINR                                                             | 1<br>1           |
| CAD15_HUMAN (P55291) Muscle-cadherin precursor (M-cadherin) (Cadherin-15) (Cadherin-14) [MASS=88915]                                                                                                          | 0.00 | 3.19 | 1.27 | 0.00 | 1 | 1 | 3                | MDAAFLLVLGLLAQSLC[339]LSLGVPGWR                                                                              | 1                |
| CALX_HUMAN (P27824) Calnexin precursor (Major histocompatibility complex class I antigen-binding protein p88) (p90) (IP90) [MASS=67568]                                                                       | *    | 5.41 | *    | *    | * | 1 | 3                | LNKPFLFDTKPLIVQYEVNFQNGIEC[339]GGAYVK                                                                        | 1                |
| CAN9_HUMAN (O14815) Calpain-9 (EC 3.4.22.-) (Digestive tract-specific calpain) (nCL-4) (CG36 protein) [MASS=79096]                                                                                            | 0.00 | 5.65 | 2.07 | 0.00 | 1 | 2 | 2<br>3           | GSLGCG[339]FIDTR<br>DM[147]DGNVDIDLPEPPKPTPPDQETEEQR                                                         | 1<br>1           |
| CAPS1_HUMAN (Q9ULU8) Calcium-dependent secretion activator 1 (Calcium-dependent activator protein for secretion 1) (CAPS-1) [MASS=152786]                                                                     | 0.00 | 2.37 | *    | *    | * | 2 | 3<br>2           | C[330]IAYPFNAKQPTDM[147]ARR<br>LMASDMIESC[339]VKRTR                                                          | 1<br>1           |
| CAPS2_HUMAN (Q86UW7) Calcium-dependent secretion activator 2 (Calcium-dependent activator protein for secretion 2) (CAPS-2) [MASS=147734]                                                                     | 0.00 | 4.78 | 0.52 | 0.00 | 1 | 2 | 3<br>3           | FVSVLEGVLSKLSRYDEGTFSSILSFTVK<br>FIAKDM[147]ENM[147]YIEELRSSVNLLM[147]ANLESLPVSK                             | 1<br>1           |
| CAR10_HUMAN (Q9BWT7) Caspase recruitment domain-containing protein 10 (CARD-containing MAGUK protein 3) (Carma 3) [MASS=115945]                                                                               | *    | 6.01 | *    | *    | * | 3 | 2<br>3<br>2      | PLLVSALRPVLLPEC[330]LAPR<br>RSFSSMSDITGSVTLKPWSPGLSSSSSSDSVWPLGK<br>C[330]LPSSR                              | 1<br>1<br>1      |
| CAR11_HUMAN (Q9BXL7) Caspase recruitment domain-containing protein 11 (CARD-containing MAGUK protein 3) (Carma 1) [MASS=132641]                                                                               | 0.00 | 5.84 | 0.69 | 0.00 | 1 | 4 | 2<br>3<br>2<br>1 | C[339]STLGKDC[330]EM[147]YK<br>QSVPLDTC[339]TKEEAHWTIQRC[339]SGPVTLYHK<br>LVKDM[147]EDGLITSGDSFYIR<br>SLPDSK | 1<br>1<br>1<br>2 |
| CARKL_HUMAN (Q9UJH6) Carbohydrate kinase-like protein (EC 2.7.1.-) [MASS=51504]                                                                                                                               | 0.00 | 9.00 | 2.63 | 0.00 | 1 | 2 | 2<br>3           | AVSHLVTWQDGR<br>TGQGC[339]EWTEGGITPVFEPRAVSHLVTWQDGR                                                         | 1<br>1           |

|                                                                                                                                                                                                                                                                                                 |      |       |      |      |   |   |   |                                         |   |
|-------------------------------------------------------------------------------------------------------------------------------------------------------------------------------------------------------------------------------------------------------------------------------------------------|------|-------|------|------|---|---|---|-----------------------------------------|---|
| CASC5_HUMAN (Q8NG31) Protein CASC5<br>(Cancer susceptibility candidate gene 5 protein)<br>(ALL1-fused gene from chromosome 15q14)<br>(AF15q14) (D40/AF15q14 protein)<br>[MASS=265191]                                                                                                           | *    | 3.59  | *    | *    | * | 5 | 3 | TIYSGEENMDITKSHTVAIDNQIFK               | 1 |
|                                                                                                                                                                                                                                                                                                 |      |       |      |      |   |   | 3 | SPIEKSGVLKSNC[330]IMDVLEDESQVK          | 1 |
|                                                                                                                                                                                                                                                                                                 |      |       |      |      |   |   | 2 | C[330]SAFPDVPDK                         | 1 |
|                                                                                                                                                                                                                                                                                                 |      |       |      |      |   |   | 2 | LLGEEIEYLKR                             | 1 |
|                                                                                                                                                                                                                                                                                                 |      |       |      |      |   |   | 2 | MLEEFSLVVHHC[339]R                      | 1 |
| CASP9_HUMAN (P55211) Caspase-9<br>precursor (EC 3.4.22.-) (CASP-9) (ICE-like<br>apoptotic protease 6) (ICE-LAP6) (Apoptotic<br>protease Mch-6) (Apoptotic protease-activating<br>factor 3) (APAF-3) [Contains: Caspase-9<br>subunit p35; Caspase-9 subunit p10]<br>[MASS=46281]                 | *    | 4.57  | *    | *    | * | 1 | 2 | ELFRPHMIEDIQRAGSGSR                     | 1 |
| CASP_HUMAN (Q13948) Protein CASP<br>[MASS=77455]                                                                                                                                                                                                                                                | *    | 1.47  | *    | *    | * | 1 | 2 | SLQSENAALR                              | 1 |
| CASR_HUMAN (P41180) Extracellular calcium-<br>sensing receptor precursor (CaSR)<br>(Parathyroid Cell calcium-sensing receptor)<br>[MASS=120673]                                                                                                                                                 | *    | 7.05  | *    | *    | * | 4 | 3 | SSSLGGSTGSTPSSSISSK                     | 1 |
|                                                                                                                                                                                                                                                                                                 |      |       |      |      |   |   | 2 | VIVVFSSGPDLEPLIKEIVR                    | 1 |
|                                                                                                                                                                                                                                                                                                 |      |       |      |      |   |   | 3 | MAFYSC[339]C[339]WVLLALTWHTSAYGPDQRAQKK | 1 |
|                                                                                                                                                                                                                                                                                                 |      |       |      |      |   |   | 2 | VAARATLR                                | 1 |
| CAZA3_HUMAN (Q96KX2) F-actin capping<br>protein alpha-3 subunit (CapZ alpha-3) (CP-<br>alpha-3) (Germ cell-specific protein 3)<br>[MASS=35024]                                                                                                                                                  | 0.00 | 5.35  | 0.81 | 0.00 | 1 | 1 | 2 | LM[147]HHQGEC[330]AGHQHC[330]QK         | 1 |
| CCD37_HUMAN (Q494V2) Coiled-coil domain-<br>containing protein 37 [MASS=71117]                                                                                                                                                                                                                  | 0.00 | 6.38  | 0.40 | 0.00 | 1 | 2 | 2 | TLEELSHLTKHTQIRM[147]DR                 | 1 |
|                                                                                                                                                                                                                                                                                                 |      |       |      |      |   |   | 2 | DAALFDEFVREND[330]SSVQAMR               | 1 |
| CCG7_HUMAN (P62955) Voltage-dependent<br>calcium channel gamma-7 subunit (Neuronal<br>voltage-gated calcium channel gamma-7<br>subunit) [MASS=31002]                                                                                                                                            | 0.00 | 13.45 | 0.88 | 0.00 | 1 | 2 | 2 | EGAGVMSVYLFTK                           | 1 |
|                                                                                                                                                                                                                                                                                                 |      |       |      |      |   |   | 2 | C[330]VASEYFLEPEINLVNTENTENILK          | 1 |
| CCNG1_HUMAN (P51959) Cyclin-G1 (Cyclin-<br>G) [MASS=34074]                                                                                                                                                                                                                                      | *    | 3.05  | *    | *    | * | 1 | 2 | WIVSGRTAR                               | 1 |
| CD59_HUMAN (P13987) CD59 glycoprotein<br>precursor (Membrane attack complex inhibition<br>factor) (MACIF) (MAC-inhibitory protein) (MAC-<br>IP) (Protectin) (MEM43 antigen) (Membrane<br>inhibitor of reactive lysis) (MIRL) (20 kDa<br>homologous restriction factor) (HRF-20)<br>[MASS=14177] | 1.00 | 42.97 | 0.37 | 0.25 | 5 | 4 | 3 | LRENELTYYC[330]C[330]K                  | 1 |
|                                                                                                                                                                                                                                                                                                 |      |       |      |      |   |   | 2 | LRENELTYYC[330]C[330]K                  | 1 |
|                                                                                                                                                                                                                                                                                                 |      |       |      |      |   |   | 3 | FEHC[339]NFNDVTTR                       | 1 |
|                                                                                                                                                                                                                                                                                                 |      |       |      |      |   |   | 2 | FEHC[330]NFNDVTTR                       | 1 |
|                                                                                                                                                                                                                                                                                                 |      |       |      |      |   |   | 3 | C[339]WKFEHC[339]NFNDVTTR               | 1 |
|                                                                                                                                                                                                                                                                                                 |      |       |      |      |   |   | 2 | LRENELTYYC[339]C[339]K                  | 1 |
|                                                                                                                                                                                                                                                                                                 |      |       |      |      |   |   | 3 | TAVNC[330]SSDFDAC[330]LITK              | 1 |



|                                                                                                                                                                                                 |      |       |      |      |   |   |   |                                            |   |
|-------------------------------------------------------------------------------------------------------------------------------------------------------------------------------------------------|------|-------|------|------|---|---|---|--------------------------------------------|---|
| CD81_HUMAN (P60033) CD81 antigen (26 kDa cell surface protein TAPA-1) (Target of the antiproliferative antibody 1) (Tetraspanin-28) (Tspan-28) [MASS=25809]                                     | 1.00 | 25.85 | 0.53 | 0.06 | 3 | 3 | 2 | TFHETLDC[330]C[330]GSSTLTALTTSVLK          | 1 |
|                                                                                                                                                                                                 |      |       |      |      |   |   | 2 | NNLC[330]PSGSNIISNLFK                      | 1 |
|                                                                                                                                                                                                 |      |       |      |      |   |   | 3 | NNLC[330]PSGSNIISNLFKEDC[339]HQK           | 1 |
|                                                                                                                                                                                                 |      |       |      |      |   |   | 2 | NNLC[339]PSGSNIISNLFK                      | 1 |
| CD82_HUMAN (P27701) CD82 antigen (Inducible membrane protein R2) (C33 antigen) (IA4) (Metastasis suppressor Kangai 1) (Suppressor of tumorigenicity-6) (Tetraspanin-27) (Tspan-27) [MASS=29625] | *    | 8.24  | *    | *    | * | 1 | 2 | DYNSSREDSLQDAWDYVQAQVK                     | 1 |
| CD86_HUMAN (P42081) T-lymphocyte activation antigen CD86 precursor (Activation B7-2 antigen) (CTLA-4 counter-receptor B7.2) (B70) (FUN-1) (BU63) [MASS=37696]                                   | *    | 4.86  | *    | *    | * | 1 | 3 | C[339]GTNTMERESEEQTKK                      | 1 |
| CDC42_HUMAN (P60953) Cell division control protein 42 homolog precursor (G25K GTP-binding protein) [MASS=21310]                                                                                 | 0.99 | 27.23 | 0.64 | 0.00 | 1 | 2 | 3 | LRPLSYPQTDVFLVC[330]FSVVSPSSFENVK          | 1 |
|                                                                                                                                                                                                 |      |       |      |      |   |   | 2 | TPFLLVGTQIDLRDDPSTIEKLAK                   | 1 |
|                                                                                                                                                                                                 |      |       |      |      |   |   | 2 | ANGGSPITAFKVEYKR                           | 2 |
| CDON_HUMAN (Q4KMG0) Cell adhesion molecule-related/down-regulated by oncogenes precursor [MASS=139233]                                                                                          | *    | 1.79  | *    | *    | * | 2 | 1 | VPESNPK                                    | 5 |
| CECR2_HUMAN (Q9BXF3) Cat eye syndrome critical region protein 2 [MASS=164214]                                                                                                                   | *    | 2.43  | *    | *    | * | 2 | 3 | LC[339]DYRLDADDVFDLLKGLDADSLR              | 1 |
|                                                                                                                                                                                                 |      |       |      |      |   |   | 3 | WMSDHLSIKPVK                               | 1 |
| CELR1_HUMAN (Q9NYQ6) Cadherin EGF LAG seven-pass G-type receptor 1 precursor (Flamingo homolog 2) (hFmi2) [MASS=329484]                                                                         | *    | 0.90  | *    | *    | * | 1 | 3 | GC[330]MQGVRM[147]GGTPTNVATLNM[147]NNALKVR | 1 |
| CELR2_HUMAN (Q9HCU4) Cadherin EGF LAG seven-pass G-type receptor 2 precursor (Epidermal growth factor-like 2) (Multiple epidermal growth factor-like domains 3) (Flamingo 1) [MASS=317450]      | *    | 2.81  | *    | *    | * | 5 | 3 | NGGTC[330]VNLLVGGFK                        | 1 |
|                                                                                                                                                                                                 |      |       |      |      |   |   | 3 | ATDGDAPPNANILYR                            | 1 |
|                                                                                                                                                                                                 |      |       |      |      |   |   | 2 | LHGLHLSNITVGGIPGAGGVAR                     | 1 |
|                                                                                                                                                                                                 |      |       |      |      |   |   | 3 | GSSNAVHYSIM[147]SGNAR                      | 1 |
|                                                                                                                                                                                                 |      |       |      |      |   |   | 2 | QRFHFTLALSFK                               | 1 |

|                                                                                                                                                                                                            |      |      |      |      |   |   |                            |                                                                                                                               |                            |
|------------------------------------------------------------------------------------------------------------------------------------------------------------------------------------------------------------|------|------|------|------|---|---|----------------------------|-------------------------------------------------------------------------------------------------------------------------------|----------------------------|
| CELR3_HUMAN (Q9NYQ7) Cadherin EGF LAG seven-pass G-type receptor 3 precursor (Flamingo homolog 1) (hFmi1) (Multiple epidermal growth factor-like domains 2) (Epidermal growth factor-like 1) [MASS=358255] | *    | 1.75 | *    | *    | * | 5 | 3<br>1<br>2<br>2<br>1      | EDGGPGLGVREPIFVGLR<br>C[330]RFLPQRPGPR<br>QERYFKLVLTAADR<br>M[147]M[147]ARRPPWR<br>AAQSER                                     | 1<br>1<br>1<br>1<br>1      |
| CENB1_HUMAN (Q15027) Centaurin-beta 1 (Cnt-b1) [MASS=81535]                                                                                                                                                | *    | 2.84 | *    | *    | * | 1 | 2                          | M[147]REAEAAQQGAGDETYLDIFR                                                                                                    | 1                          |
| CENB2_HUMAN (Q15057) Centaurin-beta 2 (Cnt-b2) [MASS=88028]                                                                                                                                                | 0.00 | 6.81 | 0.24 | 0.18 | 2 | 3 | 3<br>3<br>3                | DVQGRGPLHHATVLGHTGQVC[339]LFLK<br>MTVDFEEC[330]LKDSRFR<br>M[147]KMTVDFEEC[330]LK                                              | 1<br>1<br>1                |
| CENB5_HUMAN (Q96P50) Centaurin-beta 5 (Cnt-b5) [MASS=84664]                                                                                                                                                | *    | 3.69 | *    | *    | * | 1 | 3                          | DPLAIAVQAANADIVTLLRLARMAEEMR                                                                                                  | 1                          |
| CEND1_HUMAN (Q8WZ64) Centaurin-delta 1 (Cnt-d1) (Arf-GAP, Rho-GAP, ankyrin repeat and pleckstrin homology domain-containing protein 2) (PARX protein) [MASS=193422]                                        | *    | 3.35 | *    | *    | * | 2 | 3<br>3                     | EPDC[330]SIIIRISPMVEAEELTNDILAIKNIPTK<br>SC[330]ADC[339]KAPDPDWASINLC[330]VVIC[330]KK                                         | 1<br>1                     |
| CEND2_HUMAN (Q96P48) Centaurin-delta 2 (Cnt-d2) (Arf-GAP, Rho-GAP, ankyrin repeat and pleckstrin homology domain-containing protein 1) [MASS=136263]                                                       | 0.00 | 7.52 | 1.77 | 0.00 | 1 | 6 | 1<br>3<br>3<br>2<br>3<br>2 | HGM[147]MK<br>PWGAPETSHRPEK<br>AQEGWFSLSGSELR<br>VAGTASGTQHAGDFIC[330]TVYLEEKK<br>PPTC[339]WGFTVVHETEK<br>ARLSSAYLLGVPGSEQPDR | 1<br>1<br>1<br>1<br>1<br>1 |
| CENPF_HUMAN (P49454) CENP-F kinetochore protein (Centromere protein F) (Mitosin) (AH antigen) [MASS=367592]                                                                                                | *    | 1.18 | *    | *    | * | 2 | 2<br>2                     | KETPSAPAKGVEELES LC[330]EVYR<br>LEC[339]LLNEC[339]TSLC[330]ENRK                                                               | 1<br>1                     |
| CEP70_HUMAN (Q8NHQ1) Centrosomal protein of 70 kDa (Cep70 protein) (p10-binding protein) [MASS=69751]                                                                                                      | *    | 3.35 | *    | *    | * | 1 | 2                          | QEEAEWESINVLLM[147]M[147]HGLK                                                                                                 | 1                          |
| CERKL_HUMAN (Q49MI3) Ceramide kinase-like protein [MASS=62622]                                                                                                                                             | 0.00 | 8.96 | 0.26 | 0.00 | 1 | 3 | 3<br>2<br>2                | LFTGMQTLGPSVVC[330]VGGDGSASEVAHALLR<br>YRWM[147]SPNQR<br>NRVSALEGGR                                                           | 1<br>1<br>4                |
| CF170_HUMAN (Q96NH3) Protein C6orf170 [MASS=143651]                                                                                                                                                        | 0.00 | 1.36 | 7.57 | 0.00 | 1 | 1 | 2                          | QDNDLTKLLLC[339]LKISDK                                                                                                        | 1                          |
| CF182_HUMAN (Q8IYX8) Protein C6orf182 [MASS=53648]                                                                                                                                                         | 0.00 | 6.96 | 3.29 | 0.00 | 1 | 2 | 3<br>3                     | RPPWQIC[339]SKFGALPFVAEK<br>LEKLDVLEKEC[330]FR                                                                                | 1<br>1                     |

|                                                                                                                                                                                                                                                  |                       |       |      |      |   |   |   |                                    |   |
|--------------------------------------------------------------------------------------------------------------------------------------------------------------------------------------------------------------------------------------------------|-----------------------|-------|------|------|---|---|---|------------------------------------|---|
| CFAB_HUMAN (P00751) Complement factor B precursor (EC 3.4.21.47) (C3/C5 convertase) (Properdin factor B) (Glycine-rich beta glycoprotein) (GBG) (PBF2) [Contains: Complement factor B Ba fragment; Complement factor B Bb fragment] [MASS=85532] | *                     | 2.49  | *    | *    | * | 1 | 3 | QLNEINYEDHKLKSGTNTK                | 1 |
| CH60_HUMAN (P10809) 60 kDa heat shock protein, mitochondrial precursor (Hsp60) (60 kDa chaperonin) (CPN60) (Heat shock protein 60) (HSP-60) (Mitochondrial matrix protein P1) (P60 lymphocyte protein) (HuCHA60) [MASS=61054]                    | 1.00                  | 15.01 | 1.21 | 0.03 | 4 | 5 | 3 | FGADARALMLQGVDLLADAVAVTMGPKGR      | 2 |
|                                                                                                                                                                                                                                                  |                       |       |      |      |   |   | 2 | KGVITVKD GK                        | 1 |
|                                                                                                                                                                                                                                                  |                       |       |      |      |   |   | 2 | C[339]EFQDAYVLLSEKK                | 1 |
|                                                                                                                                                                                                                                                  |                       |       |      |      |   |   | 2 | C[330]IPALDSLTPANEDQK              | 1 |
|                                                                                                                                                                                                                                                  |                       |       |      |      |   |   | 2 | AAVEEGIVLGGGC[339]ALLR             | 1 |
| 2                                                                                                                                                                                                                                                | C[339]IPALDSLTPANEDQK | 1     |      |      |   |   |   |                                    |   |
| CHCH3_HUMAN (Q9NX63) Coiled-coil-helix-coiled-coil-helix domain-containing protein 3 [MASS=26152]                                                                                                                                                | 1.00                  | 11.89 | 1.17 | 0.03 | 2 | 2 | 2 | YESHPVC[339]ADLQAK                 | 1 |
|                                                                                                                                                                                                                                                  |                       |       |      |      |   |   | 2 | RYESHPVC[339]ADLQAK                | 1 |
| CHCH6_HUMAN (Q9BRQ6) Coiled-coil-helix-coiled-coil-helix domain-containing protein 6 [MASS=26458]                                                                                                                                                | 1.00                  | 9.36  | 1.34 | 0.03 | 2 | 2 | 2 | C[339]VSAAHKG                      | 1 |
|                                                                                                                                                                                                                                                  |                       |       |      |      |   |   | 2 | DRPHEVLLC[339]SDLVK                | 1 |
| CHD1_HUMAN (O14646) Chromodomain-helicase-DNA-binding protein 1 (EC 3.6.1.-) (ATP-dependent helicase CHD1) (CHD-1) [MASS=196517]                                                                                                                 | 0.00                  | 1.58  | 0.85 | 0.00 | 1 | 2 | 2 | SIPSPPEERKQYTI PC[339]HTK          | 1 |
|                                                                                                                                                                                                                                                  |                       |       |      |      |   |   | 2 | MEM[147]SALQK                      | 1 |
| CHD3_HUMAN (Q12873) Chromodomain helicase-DNA-binding protein 3 (EC 3.6.1.-) (ATP-dependent helicase CHD3) (CHD-3) (Mi-2 autoantigen 240 kDa protein) (Mi2-alpha) (Zinc-finger helicase) (hZFH) [MASS=226590]                                    | *                     | 1.65  | *    | *    | * | 3 | 3 | RDSEEEFGSER                        | 1 |
|                                                                                                                                                                                                                                                  |                       |       |      |      |   |   | 1 | GKKM[147]APLK                      | 2 |
|                                                                                                                                                                                                                                                  |                       |       |      |      |   |   | 2 | HRELIM[147]GEDPAQPR                | 1 |
| CHD8_HUMAN (Q9HCK8) Chromodomain-helicase-DNA-binding protein 8 (EC 3.6.1.-) (ATP-dependent helicase CHD8) (CHD-8) (Helicase with SNF2 domain 1) [MASS=262315]                                                                                   | *                     | 2.09  | *    | *    | * | 4 | 3 | HLLVYGWGRWR                        | 1 |
|                                                                                                                                                                                                                                                  |                       |       |      |      |   |   | 3 | WWEPVRHDGELLR                      | 1 |
|                                                                                                                                                                                                                                                  |                       |       |      |      |   |   | 2 | YNPDTL FQDES YK                    | 1 |
|                                                                                                                                                                                                                                                  |                       |       |      |      |   |   | 2 | LLPKLKAGGHK                        | 1 |
| CHIC1_HUMAN (Q5VXU3) Cysteine-rich hydrophobic domain 1 protein (Brain X-linked protein) [MASS=25616]                                                                                                                                            | 0.00                  | 19.64 | 1.65 | 0.00 | 1 | 2 | 2 | KC[339]ETSNM[147]M[147]EYVILIEFLPK | 1 |
|                                                                                                                                                                                                                                                  |                       |       |      |      |   |   | 3 | C[339]ETSNMMEYVILIEFLPKYPIFRPD     | 1 |

|                                                                                                                                                                                                                                                                               |      |       |       |      |   |   |   |                                         |   |
|-------------------------------------------------------------------------------------------------------------------------------------------------------------------------------------------------------------------------------------------------------------------------------|------|-------|-------|------|---|---|---|-----------------------------------------|---|
| CHMP3_HUMAN (Q9Y3E7) Charged multivesicular body protein 3 (Chromatin-modifying protein 3) (Vacuolar protein sorting 24) (hVps24) (Neuroendocrine differentiation factor) [MASS=24942]                                                                                        | 0.00 | 4.98  | 6.29  | 0.00 | 1 | 1 | 2 | GQKDVC[339]IVLAK                        | 1 |
| CHMP6_HUMAN (Q96FZ7) Charged multivesicular body protein 6 (Chromatin-modifying protein 6) (Vacuolar protein sorting 20) (hVps20) [MASS=23353]                                                                                                                                | 0.41 | 7.00  | 0.51  | 0.00 | 1 | 1 | 2 | VM[147]EGLQFGNEC[330]LNLK               | 1 |
| CHSS1_HUMAN (Q86X52) Chondroitin sulfate synthase 1 (EC 2.4.1.175) (Glucuronosyl-N-acetylgalactosaminyl-proteoglycan 4-beta-N-acetylgalactosaminyltransferase 1) (Chondroitin sulfate synthase 1) (N-acetylgalactosaminyl-proteoglycan 3-beta-glucuronosyltran [MASS=91729])  | *    | 4.86  | *     | *    | * | 2 | 3 | MVPHIGKC[339]LREM[147]YTTTHEDVEVGR      | 1 |
|                                                                                                                                                                                                                                                                               |      |       |       |      |   |   | 2 | NPPYQYRLHSYMLSRK                        | 1 |
| CHSS3_HUMAN (Q70JA7) Chondroitin sulfate synthase 3 (EC 2.4.1.175) (Glucuronosyl-N-acetylgalactosaminyl-proteoglycan 4-beta-N-acetylgalactosaminyltransferase II) (Chondroitin synthase 2) (N-acetylgalactosaminyl-proteoglycan 3-beta-glucuronosyltransferase [MASS=100356]) | 0.00 | 6.69  | 0.21  | 0.00 | 1 | 3 | 3 | EDKLEEFRLSLNSSK                         | 1 |
|                                                                                                                                                                                                                                                                               |      |       |       |      |   |   | 3 | LGLEPGENFC[339]M[147]GGPGMIFSREVLK      | 1 |
|                                                                                                                                                                                                                                                                               |      |       |       |      |   |   | 2 | LGLEPGENFC[330]M[147]GGPGMIFSR          | 1 |
| CHST5_HUMAN (Q9GZS9) Carbohydrate sulfotransferase 5 (EC 2.8.2.-) (N-acetylglucosamine 6-O-sulfotransferase 3) (GlcNAc6ST-3) (Intestinal GlcNAc-6-sulfotransferase) (Intestinal N-acetylglucosamine-6-O-sulfotransferase) (I-GlcNAc6ST) (hIGn6ST) (Galactose/N [MASS=43832])  | 0.00 | 4.87  | 3.32  | 0.00 | 1 | 1 | 3 | QPFSLAREAC[339]RSYSHVVLK                | 1 |
| CHSTE_HUMAN (Q8NCH0) Carbohydrate sulfotransferase D4ST1 (EC 2.8.2.-) (Dermatan 4-sulfotransferase 1) (D4ST-1) (hD4ST) [MASS=42997]                                                                                                                                           | 0.00 | 19.41 | 34.22 | 0.00 | 1 | 4 | 2 | APKPGGLSLRAGDADLQVR                     | 1 |
|                                                                                                                                                                                                                                                                               |      |       |       |      |   |   | 2 | MFPRPLTPLAAPNGAEPLGRALR                 | 1 |
|                                                                                                                                                                                                                                                                               |      |       |       |      |   |   | 2 | PGGLSLRAGDADLQVRQDVR                    | 1 |
|                                                                                                                                                                                                                                                                               |      |       |       |      |   |   | 2 | VAC[339]SNWKRVMK                        | 1 |
| CI004_HUMAN (Q9P0K9) Protein C9orf4 (Brain protein CG-6) [MASS=37270]                                                                                                                                                                                                         | *    | 9.88  | *     | *    | * | 1 | 3 | QHPGVWASLLLLLLTGPAAC[339]AASPADDGAGPGGR | 1 |
| CI032_HUMAN (Q9BV86) Protein C9orf32 [MASS=25256]                                                                                                                                                                                                                             | 0.33 | 33.78 | 2.41  | 0.00 | 1 | 3 | 3 | AKTYWKQIPPTVDGM[147]LGGYGHISIDINSSR     | 1 |
|                                                                                                                                                                                                                                                                               |      |       |       |      |   |   | 2 | EVDM[147]VDITEDFLVQAKTYLGEEGKR          | 1 |
|                                                                                                                                                                                                                                                                               |      |       |       |      |   |   | 2 | DNMAQEGVILDDVDSSVC[339]R                | 1 |

|                                                                                                                                                          |      |       |      |      |    |   |   |                                       |   |
|----------------------------------------------------------------------------------------------------------------------------------------------------------|------|-------|------|------|----|---|---|---------------------------------------|---|
| CIC_HUMAN (Q96RK0) Protein capicua homolog [MASS=163789]                                                                                                 | 0.00 | 6.53  | 0.42 | 0.00 | 1  | 6 | 2 | YADIFPSKVC[339]LQLKIR                 | 1 |
|                                                                                                                                                          |      |       |      |      |    |   | 2 | PVSSTPVPIASKPFPTSGR                   | 1 |
|                                                                                                                                                          |      |       |      |      |    |   | 3 | M[147]VIC[330]EEEGDDDDVIADDGFGTTDIDLK | 1 |
|                                                                                                                                                          |      |       |      |      |    |   | 2 | FAELPEFR                              | 1 |
|                                                                                                                                                          |      |       |      |      |    |   | 3 | VLSEVDFEERFAELPEFR                    | 1 |
|                                                                                                                                                          |      |       |      |      |    |   | 3 | TVSKILGEWWYALGPKEK                    | 1 |
| CISY_HUMAN (O75390) Citrate synthase, mitochondrial precursor (EC 2.3.3.1) [MASS=51712]                                                                  | 1.00 | 7.51  | 1.54 | 0.03 | 4  | 3 | 1 | LPC[339]VAAK                          | 2 |
|                                                                                                                                                          |      |       |      |      |    |   | 2 | GFSIPEC[339]QK                        | 1 |
|                                                                                                                                                          |      |       |      |      |    |   | 2 | TVVGQITVDM[M][147]YGGM[147]RGMK       | 1 |
|                                                                                                                                                          |      |       |      |      |    |   | 1 | LPC[330]VAAK                          | 1 |
|                                                                                                                                                          |      |       |      |      |    |   | 2 | LPC[339]VAAK                          | 1 |
|                                                                                                                                                          |      |       |      |      |    |   | 2 | IVHAFDM[147]EDLGDKAVYC[339]R          | 1 |
| CJ070_HUMAN (Q9NZ45) Protein C10orf70 [MASS=12199]                                                                                                       | 1.00 | 36.11 | 1.05 | 0.09 | 11 | 3 | 2 | KFPFC[330]DGAHTK                      | 2 |
|                                                                                                                                                          |      |       |      |      |    |   | 2 | KFPFC[330]DGAHTK                      | 2 |
|                                                                                                                                                          |      |       |      |      |    |   | 2 | FPFC[339]DGAHTK                       | 2 |
|                                                                                                                                                          |      |       |      |      |    |   | 1 | FPFC[339]DGAHTK                       | 1 |
|                                                                                                                                                          |      |       |      |      |    |   | 3 | IVHAFDM[147]EDLGDKAVYC[339]R          | 1 |
|                                                                                                                                                          |      |       |      |      |    |   | 2 | IVHAFDMEDLGDKAVYC[330]R               | 1 |
| CJ084_HUMAN (Q9H8W3) Protein C10orf84 [MASS=27021]                                                                                                       | *    | 6.01  | *    | *    | *  | 1 | 2 | ELHSEPSSNETQWK                        | 1 |
|                                                                                                                                                          |      |       |      |      |    |   | 2 | ELHSEPSSNETQWK                        | 1 |
| CK042_HUMAN (Q8N5U0) Uncharacterized protein C11orf42 [MASS=36367]                                                                                       | 0.00 | 7.81  | 0.45 | 0.00 | 1  | 1 | 3 | ALKPVGPLPSLLEQAGSEGAFHC[339]TR        | 1 |
| CK5P2_HUMAN (Q96SN8) CDK5 regulatory subunit-associated protein 2 (CDK5 activator-binding protein C48) (Centrosome-associated protein 215) [MASS=215036] | *    | 3.28  | *    | *    | *  | 5 | 2 | QHMNTM[147]IK                         | 1 |
|                                                                                                                                                          |      |       |      |      |    |   | 3 | LPATQEVVTQLQSQILELQGELK               | 1 |
|                                                                                                                                                          |      |       |      |      |    |   | 3 | ILGPLAPEMIDSR                         | 1 |
|                                                                                                                                                          |      |       |      |      |    |   | 2 | AEVTKLHK                              | 1 |
|                                                                                                                                                          |      |       |      |      |    |   | 2 | LHKKLFQEKE                            | 1 |
| CLC14_HUMAN (Q86T13) C-type lectin domain family 14 member A precursor (Epidermal growth factor receptor 5) (EGFR-5) [MASS=51635]                        | *    | 3.88  | *    | *    | *  | 1 | 3 | AGC[339]SASGAC[330]YSLHHATMKR         | 1 |
| CLCKA_HUMAN (P51800) Chloride channel protein CIC-Ka (Chloride channel Ka) (CIC-K1) [MASS=75284]                                                         | 0.00 | 4.51  | 1.11 | 0.00 | 1  | 1 | 3 | LGEDWYFLMTLGVLMALVSYAMNFAIGC[330]VVR  | 1 |

|                                                                                                                                                                                    |      |      |      |      |   |   |   |                                   |   |
|------------------------------------------------------------------------------------------------------------------------------------------------------------------------------------|------|------|------|------|---|---|---|-----------------------------------|---|
| CLH1_HUMAN (Q00610) Clathrin heavy chain 1 (CLH-17) [MASS=191482]                                                                                                                  | 1.00 | 4.18 | 0.56 | 0.07 | 4 | 4 | 2 | RDPHLAC[330]VAYER                 | 1 |
|                                                                                                                                                                                    |      |      |      |      |   |   | 2 | IHEGC[330]EEPATHNALAK             | 1 |
|                                                                                                                                                                                    |      |      |      |      |   |   | 3 | IHEGC[339]EEPATHNALAK             | 1 |
|                                                                                                                                                                                    |      |      |      |      |   |   | 3 | IHEGC[330]EEPATHNALAK             | 1 |
|                                                                                                                                                                                    |      |      |      |      |   |   | 2 | AIQFYLEFKPLLLNDLLMVLSPR           | 1 |
|                                                                                                                                                                                    |      |      |      |      |   |   | 2 | AYEFAERC[339]NEPAVWSQLAK          | 1 |
| CLH2_HUMAN (P53675) Clathrin heavy chain 2 (CLH-22) [MASS=187029]                                                                                                                  | 0.00 | 1.40 | *    | *    | * | 2 | 1 | HLIMAVR                           | 1 |
|                                                                                                                                                                                    |      |      |      |      |   |   | 2 | HNLVDLAMPYFIQVMR                  | 1 |
| CM007_HUMAN (Q5W0B1) Protein C13orf7 [MASS=81116]                                                                                                                                  | 0.00 | 5.51 | 1.07 | 0.00 | 1 | 2 | 3 | LNSIRSFEM[147]NRTR                | 1 |
|                                                                                                                                                                                    |      |      |      |      |   |   | 2 | QPGSSTSSSHLAKPSSSRLC[339]DTSSAR   | 1 |
| CMC1_HUMAN (O75746) Calcium-binding mitochondrial carrier protein Aralar1 (Mitochondrial aspartate glutamate carrier 1) (Solute carrier family 25 member 12) [MASS=74755]          | 1.00 | 4.57 | 0.97 | 0.15 | 4 | 2 | 2 | DIPFSAIFPVYAHC[339]JK             | 1 |
|                                                                                                                                                                                    |      |      |      |      |   |   | 2 | AGQTTYSGVIDC[339]FRK              | 1 |
|                                                                                                                                                                                    |      |      |      |      |   |   | 2 | DIPFSAIFPVYAHC[330]JK             | 2 |
| CMC2_HUMAN (Q9UJS0) Calcium-binding mitochondrial carrier protein Aralar2 (Mitochondrial aspartate glutamate carrier 2) (Solute carrier family 25 member 13) (Citrin) [MASS=74175] | 0.00 | 2.37 | 1.04 | 0.00 | 1 | 1 | 2 | DIPFSAIFPC[330]YAHVK              | 1 |
|                                                                                                                                                                                    |      |      |      |      |   |   |   |                                   |   |
| CN050_HUMAN (Q96LQ0) Protein C14orf50 [MASS=49440]                                                                                                                                 | *    | 8.06 | *    | *    | * | 2 | 3 | IC[330]SFTTFM[147]RNK             | 2 |
|                                                                                                                                                                                    |      |      |      |      |   |   | 2 | RLGGQTPYLM[147]DQLGLRLGM[147]WYWK | 1 |
| CN145_HUMAN (Q6ZU80) Protein C14orf145 [MASS=73571]                                                                                                                                | 0.00 | 2.41 | 4.39 | 0.00 | 1 | 2 | 2 | HQLM[147]LC[339]R                 | 1 |
|                                                                                                                                                                                    |      |      |      |      |   |   | 2 | WLAESKTK                          | 1 |
| CN159_HUMAN (Q7Z3D6) Protein C14orf159, mitochondrial precursor [MASS=66436]                                                                                                       | *    | 3.41 | *    | *    | * | 1 | 3 | KIPGISSTGVGDGGNELGMGK             | 1 |

|                                                                                                                                |      |       |      |      |    |   |  |   |                                |   |
|--------------------------------------------------------------------------------------------------------------------------------|------|-------|------|------|----|---|--|---|--------------------------------|---|
|                                                                                                                                |      |       |      |      |    |   |  | 2 | RPPGVLHC[339]TTK               | 2 |
|                                                                                                                                |      |       |      |      |    |   |  | 3 | AHITLGC[339]AADVEAVQTGLDLLEILR | 3 |
|                                                                                                                                |      |       |      |      |    |   |  | 2 | FC[330]DYGK                    | 1 |
|                                                                                                                                |      |       |      |      |    |   |  | 2 | AHITLGC[330]AADVEAVQTGLDLLEILR | 1 |
|                                                                                                                                |      |       |      |      |    |   |  | 3 | DKPELQFPFLQDEDTVATLLEC[330]K   | 1 |
|                                                                                                                                |      |       |      |      |    |   |  | 3 | DKPELQFPFLQDEDTVATLLEC[339]K   | 1 |
|                                                                                                                                |      |       |      |      |    |   |  | 2 | FC[339]DYGK                    | 1 |
|                                                                                                                                |      |       |      |      |    |   |  | 2 | RLDEDLAAYC[330]R               | 1 |
|                                                                                                                                |      |       |      |      |    |   |  | 1 | FC[330]DYGK                    | 1 |
|                                                                                                                                |      |       |      |      |    |   |  | 3 | AHITLGC[330]AADVEAVQTGLDLLEILR | 2 |
|                                                                                                                                |      |       |      |      |    |   |  | 2 | RLDEDLAAYC[339]R               | 1 |
|                                                                                                                                |      |       |      |      |    |   |  | 2 | DKPELQFPFLQDEDTVATLLEC[330]K   | 2 |
|                                                                                                                                |      |       |      |      |    |   |  | 2 | VIIIEC[339]KPK                 | 1 |
|                                                                                                                                |      |       |      |      |    |   |  | 2 | VIIIEC[330]KPK                 | 1 |
|                                                                                                                                |      |       |      |      |    |   |  | 3 | VLEPMPSTAEISTSGAVLK            | 1 |
|                                                                                                                                |      |       |      |      |    |   |  | 2 | C[330]SPNM[147]C[330]EHDGR     | 1 |
|                                                                                                                                |      |       |      |      |    |   |  | 2 | GETC[339]HTPLYK                | 1 |
|                                                                                                                                |      |       |      |      |    |   |  | 2 | PGLAGHKGEMGEPGVPQGSGAPGK       | 1 |
|                                                                                                                                |      |       |      |      |    |   |  | 2 | GPKGDPGLPGAPGER                | 1 |
|                                                                                                                                |      |       |      |      |    |   |  | 3 | QQQPVEVERTAFIDFVEKDR           | 1 |
|                                                                                                                                |      |       |      |      |    |   |  | 2 | AVLFC[330]LSEDKK               | 1 |
|                                                                                                                                |      |       |      |      |    |   |  | 3 | AVLFC[330]LSEDKK               | 1 |
|                                                                                                                                |      |       |      |      |    |   |  | 2 | M[147]LPDKDC[330]R             | 2 |
|                                                                                                                                |      |       |      |      |    |   |  | 2 | MLPDKDC[330]R                  | 1 |
|                                                                                                                                |      |       |      |      |    |   |  | 2 | M[147]LPDKDC[339]R             | 1 |
|                                                                                                                                |      |       |      |      |    |   |  | 2 | HELQANC[330]YEEVKDR            | 1 |
| CN37_HUMAN (P09543) 2',3'-cyclic-nucleotide 3'-phosphodiesterase (EC 3.1.4.37) (CNP) (CNPase) [MASS=47578]                     | 1.00 | 18.05 | 0.97 | 0.12 | 16 | 5 |  |   |                                |   |
| CNTN1_HUMAN (Q12860) Contactin-1 precursor (Neural cell surface protein F3) (Glycoprotein gp135) [MASS=113320]                 | 1.00 | 2.65  | 0.48 | 0.02 | 2  | 2 |  |   |                                |   |
| CNTP1_HUMAN (P78357) Contactin-associated protein 1 precursor (Caspr) (Caspr1) (Neurexin 4) (Neurexin IV) (p190) [MASS=156266] | 1.00 | 1.52  | 0.50 | 0.32 | 2  | 2 |  |   |                                |   |
| CO7A1_HUMAN (Q02388) Collagen alpha-1(VII) chain precursor (Long-chain collagen) (LC collagen) [MASS=295217]                   | *    | 1.32  | *    | *    | *  | 2 |  |   |                                |   |
| COE4_HUMAN (Q9BQW3) Transcription factor COE4 (Early B-cell factor 4) (EBF-4) (Olf-1/EBF-like 4) (OE-4) (O/E-4) [MASS=68360]   | *    | 3.11  | *    | *    | *  | 1 |  |   |                                |   |
| COF1_HUMAN (P23528) Cofilin-1 (Cofilin, non-muscle isoform) (18 kDa phosphoprotein) (p18) [MASS=18371]                         | 1.00 | 20.00 | 0.56 | 0.25 | 7  | 3 |  |   |                                |   |

|                                                                                                                                                                     |      |       |      |      |   |   |   |                                               |   |
|---------------------------------------------------------------------------------------------------------------------------------------------------------------------|------|-------|------|------|---|---|---|-----------------------------------------------|---|
| COG5_HUMAN (Q9UP83) Conserved oligomeric Golgi complex component 5 (13S Golgi transport complex 90 kDa subunit) (GTC-90) (Golgi transport complex 1) [MASS=92718]   | 0.00 | 7.63  | 0.43 | 0.00 | 1 | 4 | 2 | LAADFAQM[147]ELAVGPFC[330]R                   | 1 |
|                                                                                                                                                                     |      |       |      |      |   |   | 2 | IVARTAQLARLQVAC[330]DLLR                      | 1 |
|                                                                                                                                                                     |      |       |      |      |   |   | 3 | GGPGRSTMPGNTAALR                              | 1 |
|                                                                                                                                                                     |      |       |      |      |   |   | 2 | LQQQLQGGSR                                    | 1 |
| COLQ_HUMAN (Q9Y215) Acetylcholinesterase collagenic tail peptide precursor (AChE Q subunit) (Acetylcholinesterase-associated collagen) [MASS=47881]                 | 0.00 | 16.23 | 0.88 | 0.00 | 1 | 3 | 3 | AC[330]C[330]LLTPPPPLFPPFFRGGR                | 1 |
|                                                                                                                                                                     |      |       |      |      |   |   | 2 | GEKGDLM[147]MGLPGSR                           | 1 |
|                                                                                                                                                                     |      |       |      |      |   |   | 3 | GDSGVM[147]GPPGKPGPSGQPRPGPPGPPAGQLIM[147]GPK | 1 |
| COPA_HUMAN (P53621) Coatamer subunit alpha (Alpha-coat protein) (Alpha-COP) (HEPCOP) (HEP-COP) [Contains: Xenin (Xenopsin-related peptide); Proxenin] [MASS=138331] | *    | 0.41  | *    | *    | * | 1 | 1 | KKLPK                                         | 1 |
| COPG_HUMAN (Q9Y678) Coatamer subunit gamma (Gamma-coat protein) (Gamma-COP) [MASS=97718]                                                                            | *    | 1.60  | *    | *    | * | 1 | 3 | FIYNRVVLEHEEVR                                | 1 |
| COX5B_HUMAN (P10606) Cytochrome c oxidase polypeptide Vb, mitochondrial precursor (EC 1.9.3.1) [MASS=13696]                                                         | 0.97 | 27.13 | 1.56 | 0.01 | 3 | 2 | 3 | GLDPYNVLAPKGASGTREDPNLVPSISNK                 | 1 |
|                                                                                                                                                                     |      |       |      |      |   |   | 2 | C[339]GAHYK                                   | 1 |
|                                                                                                                                                                     |      |       |      |      |   |   | 1 | C[339]GAHYK                                   | 2 |
| COX7C_HUMAN (P15954) Cytochrome c oxidase polypeptide VIc, mitochondrial precursor (EC 1.9.3.1) [MASS=7245]                                                         | 1.00 | 26.98 | 1.06 | 0.03 | 4 | 1 | 2 | M[147]C[330]LYFGSAFATPFLVVR                   | 1 |
|                                                                                                                                                                     |      |       |      |      |   |   | 2 | MC[339]LYFGSAFATPFLVVR                        | 1 |
|                                                                                                                                                                     |      |       |      |      |   |   | 2 | M[147]C[339]LYFGSAFATPFLVVR                   | 1 |
|                                                                                                                                                                     |      |       |      |      |   |   | 2 | MC[330]LYFGSAFATPFLVVR                        | 1 |
| CPLX2_HUMAN (Q6PUV4) Complexin-2 (Complexin II) (CPX II) (Synaphin-1) [MASS=15394]                                                                                  | 0.95 | 11.19 | 0.63 | 0.00 | 1 | 1 | 2 | AALEQPC[330]EGSLTRPK                          | 1 |
| CPNE6_HUMAN (O95741) Copine-6 (Copine VI) (Neuronal-copine) (N-copine) [MASS=61991]                                                                                 | *    | 5.39  | *    | *    | * | 2 | 2 | SC[339]SSPVFSR                                | 1 |
|                                                                                                                                                                     |      |       |      |      |   |   | 3 | M[147]SDPEMGWVPEPTM[147]TLGASR                | 1 |
| CQ032_HUMAN (Q8N511) Uncharacterized protein C17orf32 [MASS=23130]                                                                                                  | 0.00 | 5.77  | 2.51 | 0.00 | 1 | 1 | 3 | RITRNVTC[339]QDTR                             | 1 |
| CR018_HUMAN (Q96FQ7) Uncharacterized protein C18orf18 [MASS=10201]                                                                                                  | 0.00 | 12.63 | 0.37 | 0.00 | 1 | 1 | 2 | SAPC[330]DLGASQRK                             | 1 |
| CRTC_HUMAN (P27797) Calreticulin precursor (CRP55) (Calregulin) (HACBP) (ERp60) (grp60) [MASS=48141]                                                                | 0.99 | 3.12  | 1.86 | 0.00 | 1 | 1 | 2 | HEQNIDC[339]GGGYVK                            | 1 |



|                                                                                                                                                                                                        |      |      |      |      |   |   |                                 |                                                                                                                                                                  |                                 |
|--------------------------------------------------------------------------------------------------------------------------------------------------------------------------------------------------------|------|------|------|------|---|---|---------------------------------|------------------------------------------------------------------------------------------------------------------------------------------------------------------|---------------------------------|
| CRYM_HUMAN (Q14894) Mu-crystallin homolog (NADP-regulated thyroid-hormone-binding protein) [MASS=33775]                                                                                                | 0.00 | 8.92 | 0.75 | 0.00 | 1 | 2 | 2                               | GYLGVMPAYSAEALTTK<br>GVKPAHC[330]JEK                                                                                                                             | 1<br>1                          |
| CS016_HUMAN (Q8ND99) Uncharacterized protein C19orf16 [MASS=60172]                                                                                                                                     | 0.00 | 5.11 | 0.93 | 0.00 | 1 | 2 | 3<br>2                          | ALPTSPTQYQM[147]ALSPASR<br>APSGPVTSC[339]JK                                                                                                                      | 1<br>1                          |
| CSDE1_HUMAN (O75534) Cold shock domain-containing protein E1 (UNR protein) (N-ras upstream gene protein) [MASS=88884]                                                                                  | *    | 2.88 | *    | *    | * | 2 | 2<br>3                          | VEFSISDK<br>QPRGPDNSM[147]GFGAER                                                                                                                                 | 1<br>1                          |
| CSMD1_HUMAN (Q96PZ7) CUB and sushi domain-containing protein 1 precursor (CUB and sushi multiple domains protein 1) [MASS=388867]                                                                      | *    | 2.97 | *    | *    | * | 5 | 3<br>3<br>2<br>3<br>3           | WGSSISYSC[330]M[147]DGYQLSHSAILSC[339]EGRGVWK<br>LLSSLGSHSGETLPLATSNQILLR<br>NGGILNRTAGAVGSKVHYFC[339]JK<br>C[339]EDPGIPNYGYR<br>PVAC[339]PSIEAQLSEHVIWR         | 1<br>1<br>1<br>1<br>1           |
| CSPG2_HUMAN (P13611) Versican core protein precursor (Large fibroblast proteoglycan) (Chondroitin sulfate proteoglycan core protein 2) (PG-M) (Glial hyaluronate-binding protein) (GHAP) [MASS=372817] | 1.00 | 2.74 | 0.62 | 0.10 | 3 | 6 | 2<br>3<br>2<br>2<br>3<br>1<br>2 | WAIPKITC[330]M[147]NPSAYQR<br>ATVQPQAITDSLATKLPPTGSTKK<br>FDAYC[339]FKPK<br>FTFEEAAKEC[330]ENQDAR<br>VGHDYQWIGLNDKM[147]FEHDFR<br>VGC[330]YGDK<br>FDAYC[330]FKPK | 1<br>1<br>1<br>1<br>1<br>1<br>1 |
| CSPG3_HUMAN (O14594) Neurocan core protein precursor (Chondroitin sulfate proteoglycan 3) [MASS=142972]                                                                                                | 0.98 | 2.42 | 0.33 | 0.00 | 1 | 2 | 2<br>2                          | LGSGSVQAALAEVALPC[330]LFTLQPR<br>FQGHC[339]YR                                                                                                                    | 1<br>1                          |
| CT135_HUMAN (Q9H3Z7) Uncharacterized protein C20orf135 [MASS=52554]                                                                                                                                    | 0.00 | 3.41 | 2.25 | 0.00 | 1 | 1 | 3                               | LVAC[339]DGNEIDTMFMDR                                                                                                                                            | 1                               |
| CTBP1_HUMAN (Q13363) C-terminal-binding protein 1 (EC 1.1.1.-) (CtBP1) [MASS=47535]                                                                                                                    | *    | 5.23 | *    | *    | * | 1 | 3                               | VLNEAVGALM[147]YHTITLTREDLEK                                                                                                                                     | 1                               |
| CTL2_HUMAN (Q8IWA5) Choline transporter-like protein 2 (Solute carrier family 44 member 2) [MASS=80151]                                                                                                | *    | 2.55 | *    | *    | * | 1 | 3                               | FAKC[330]LMTC[330]LKC[339]C[339]FWC[330]LEK                                                                                                                      | 1                               |
| CTN1_HUMAN (P35221) Alpha-1 catenin (Cadherin-associated protein) (Alpha E-catenin) (NY-REN-13 antigen) [MASS=100071]                                                                                  | 0.00 | 4.19 | 2.27 | 0.00 | 1 | 2 | 2<br>2                          | TLAVERLLEPLVTQVTTLVNTNSK<br>QM[147]C[339]MIMMEMTDFTR                                                                                                             | 1<br>1                          |
| CTNB1_HUMAN (P35222) Beta-catenin [MASS=85496]                                                                                                                                                         | *    | 2.82 | *    | *    | * | 1 | 3                               | SPQM[147]VSAIVRTMQNTNDVETAR                                                                                                                                      | 1                               |
| CU005_HUMAN (Q9Y3R5) Protein C21orf5 [MASS=258222]                                                                                                                                                     | *    | 1.39 | *    | *    | * | 2 | 2<br>2                          | IILETKAVIPGDEDASFPLK<br>SYSSVIEKALR                                                                                                                              | 1<br>1                          |

|                                                                                                                                                                                                                                                                             |                               |       |      |      |   |   |   |                               |   |
|-----------------------------------------------------------------------------------------------------------------------------------------------------------------------------------------------------------------------------------------------------------------------------|-------------------------------|-------|------|------|---|---|---|-------------------------------|---|
| CU055_HUMAN (Q9NX36) J domain-containing protein C21orf55 [MASS=45805]                                                                                                                                                                                                      | *                             | 4.64  | *    | *    | * | 1 | 3 | EYYRLLNVEEGC[339]SADEVK       | 1 |
| CU063_HUMAN (P58658) Protein C21orf63 precursor (SUE21) [MASS=49483]                                                                                                                                                                                                        | *                             | 3.17  | *    | *    | * | 1 | 3 | QPPTQPVQHPGLR                 | 1 |
| CU116_HUMAN (Q9H386) Protein C21orf116 [MASS=7936]                                                                                                                                                                                                                          | 0.00                          | 31.88 | 9.85 | 0.00 | 1 | 1 | 3 | MMVLTPFWLGRDC[339]PSRGQPTLR   | 1 |
| CUGB1_HUMAN (Q92879) CUG triplet repeat RNA-binding protein 1 (CUG-BP1) (RNA-binding protein BRUNOL-2) (Deadenylation factor CUG-BP) (50 kDa Nuclear polyadenylated RNA-binding protein) (EDEN-BP) [MASS=52063]                                                             | 0.21                          | 2.06  | 0.71 | 0.00 | 1 | 1 | 2 | GC[330]AFVTFTR                | 1 |
| CUTA_HUMAN (O60888) Protein CutA precursor (Brain acetylcholinesterase putative membrane anchor) (Acetylcholinesterase-associated protein) [MASS=19116]                                                                                                                     | 0.00                          | 10.61 | 4.26 | 0.00 | 1 | 1 | 2 | RLAAC[339]VNLIPQITSIYEWK      | 1 |
| CUTL1_HUMAN (P39880) Homeobox protein cut-like 1 (CCAAT displacement protein) (CDP) [MASS=164271]                                                                                                                                                                           | *                             | 1.40  | *    | *    | * | 1 | 2 | LLSTSPMPTVSSYPPLAISLK         | 1 |
| CXA1_HUMAN (P17302) Gap junction alpha-1 protein (Connexin-43) (Cx43) (Gap junction 43 kDa heart protein) [MASS=42877]                                                                                                                                                      | *                             | 2.36  | *    | *    | * | 1 | 2 | VKMRGGLLR                     | 1 |
| CY1_HUMAN (P08574) Cytochrome c1, heme protein, mitochondrial precursor (Cytochrome c-1) [MASS=35390]                                                                                                                                                                       | 1.00                          | 20.00 | 1.14 | 0.05 | 7 | 4 | 2 | DVC[339]TFLR                  | 1 |
|                                                                                                                                                                                                                                                                             |                               |       |      |      |   |   | 2 | MGLKMLMMALLVPLVYTIKR          | 1 |
|                                                                                                                                                                                                                                                                             |                               |       |      |      |   |   | 2 | HLVGVC[330]YTEDEAK            | 1 |
|                                                                                                                                                                                                                                                                             |                               |       |      |      |   |   | 2 | HLVGVC[339]YTEDEAK            | 1 |
|                                                                                                                                                                                                                                                                             |                               |       |      |      |   |   | 3 | HGGEDYVFSLLTGYC[339]EPPTGVSLR | 3 |
| 2                                                                                                                                                                                                                                                                           | HGGEDYVFSLLTGYC[330]EPPTGVSLR | 1     |      |      |   |   |   |                               |   |
| CY24B_HUMAN (P04839) Cytochrome b-245 heavy chain (p22 phagocyte B-cytochrome) (Neutrophil cytochrome b 91 kDa polypeptide) (CGD91-phox) (gp91-phox) (gp91-1) (Heme-binding membrane glycoprotein gp91phox) (Cytochrome b(558) subunit beta) (Cytochrome b558) [MASS=65204] | *                             | 3.69  | *    | *    | * | 1 | 2 | IVRGQTAESLAVHNITVC[339]EQK    | 1 |

|                                                                                                                                                                                                                                                                              |      |       |      |      |   |   |   |                                                                                                |             |
|------------------------------------------------------------------------------------------------------------------------------------------------------------------------------------------------------------------------------------------------------------------------------|------|-------|------|------|---|---|---|------------------------------------------------------------------------------------------------|-------------|
| D1IP_HUMAN (Q9NYX4) D1 dopamine receptor-interacting protein calcyon [MASS=23434]                                                                                                                                                                                            | 0.00 | 8.29  | 3.46 | 0.00 | 1 | 1 | 3 | IC[339]TPLTLEM[147]YYTEM[147]DPER                                                              | 1           |
| DAXX_HUMAN (Q9UER7) Death domain-associated protein 6 (Daxx) (hDaxx) (Fas death domain-associated protein) (ETS1-associated protein 1) (EAP1) [MASS=81372]                                                                                                                   | 0.00 | 2.57  | 2.86 | 0.00 | 1 | 1 | 2 | TSVATQC[339]DPEEIVLSDSD                                                                        | 1           |
| DC12_HUMAN (Q96FZ2) UPF0361 protein DC12 [MASS=40575]                                                                                                                                                                                                                        | 0.00 | 1.98  | 0.58 | 0.00 | 1 | 1 | 2 | TSC[330]HLPR                                                                                   | 1           |
| DCAK2_HUMAN (Q8N568) Serine/threonine-protein kinase DCAMKL2 (EC 2.7.11.1) (Doublecortin-like and CAM kinase-like 2) [MASS=83639]                                                                                                                                            | 0.00 | 6.14  | 0.61 | 0.00 | 1 | 2 | 3 | HPNIIMLVEEMETATELFLVM[147]ELVK<br>QVTC[330]LQDFFGDDVFIAC[330]GPEK                              | 1<br>1      |
| DCE2_HUMAN (Q05329) Glutamate decarboxylase 2 (EC 4.1.1.15) (Glutamate decarboxylase, 65 kDa isoform) (GAD-65) (65 kDa glutamic acid decarboxylase) [MASS=65411]                                                                                                             | 1.00 | 12.99 | 0.75 | 0.73 | 2 | 3 | 2 | C[339]LELAEYLYNIIK<br>GFVPFLVSATAGTTVYGAFDPLLAVADIC[330]K<br>KMREIIGWPGGSGDGIFSPGGAISNMYAMMIAR | 1<br>1<br>1 |
| DCUP_HUMAN (P06132) Uroporphyrinogen decarboxylase (EC 4.1.1.37) (URO-D) (UPD) [MASS=40787]                                                                                                                                                                                  | 0.00 | 3.81  | 1.52 | 0.00 | 1 | 1 | 2 | SPEAC[339]C[339]ELTLQPLR                                                                       | 1           |
| DCXR_HUMAN (Q7Z4W1) L-xylulose reductase (EC 1.1.1.10) (XR) (Dicarbonyl/L-xylulose reductase) (Kidney dicarbonyl reductase) (kiDCR) (Carbonyl reductase II) (Sperm surface protein P34H) [MASS=25913]                                                                        | *    | 6.56  | *    | *    | * | 1 | 2 | VVAVSRTQADLDSLVR                                                                               | 1           |
| DDAH1_HUMAN (O94760) NG,NG-dimethylarginine dimethylaminohydrolase 1 (EC 3.5.3.18) (Dimethylargininase-1) (Dimethylarginine dimethylaminohydrolase 1) (DDAH1) (DDAH-1) [MASS=30990]                                                                                          | 0.00 | 16.55 | 0.96 | 0.00 | 1 | 2 | 2 | VDGLLTC[339]C[339]SVLINK<br>LQLNIVEM[147]KDENATLDGGDVLFTGREFFVGLSK                             | 1<br>1      |
| DDR1_HUMAN (Q08345) Epithelial discoidin domain-containing receptor 1 precursor (EC 2.7.10.1) (Epithelial discoidin domain receptor 1) (Tyrosine kinase DDR) (Discoidin receptor tyrosine kinase) (Tyrosine-protein kinase CAK) (Cell adhesion kinase) (TRK E) [MASS=101127] | *    | 3.29  | *    | *    | * | 2 | 2 | KGHPLLVAVK<br>DRWGQEVISGNEDPEGVVLK                                                             | 1<br>1      |

|                                                                                                                                                                                                                                                                             |      |       |      |      |   |   |   |                                                                                                   |             |
|-----------------------------------------------------------------------------------------------------------------------------------------------------------------------------------------------------------------------------------------------------------------------------|------|-------|------|------|---|---|---|---------------------------------------------------------------------------------------------------|-------------|
| DDX1_HUMAN (Q92499) ATP-dependent RNA helicase DDX1 (EC 3.6.1.-) (DEAD box protein 1) (DEAD box protein retinoblastoma) (DBP-RB) [MASS=82432]                                                                                                                               | 0.00 | 9.46  | 5.24 | 0.00 | 1 | 3 | 3 | WQM[147]NPYDRGSAFAIGSDGLC[330]C[330]QSR<br>VTYGQKRAAGGGSYK<br>SHNKQFDNYGEEFTMHTIGC[339]YLDIDKGHVK | 1<br>1<br>1 |
| DECR_HUMAN (Q16698) 2,4-dienoyl-CoA reductase, mitochondrial precursor (EC 1.3.1.34) (2,4-dienoyl-CoA reductase [NADPH]) (4-enoyl-CoA reductase [NADPH]) [MASS=36067]                                                                                                       | *    | 17.31 | *    | *    | * |   | 3 | 2 RFFSYGTKILYQNTEALQSK<br>3 AGVEAM[147]SKSLAAEWGK<br>2 VAGHPNIVINNAAGNFISPTER                     | 1<br>1<br>1 |
| DEN1A_HUMAN (Q8TEH3) DENN domain-containing protein 1A [MASS=110576]                                                                                                                                                                                                        | 0.00 | 2.18  | *    | *    | * |   | 1 | 3 TKQDVSPSPALAPAPDSVEQLR                                                                          | 1           |
| DEST_HUMAN (P60981) Destrin (Actin-depolymerizing factor) (ADF) [MASS=18374]                                                                                                                                                                                                | *    | 17.07 | *    | *    | * |   | 1 | 3 EILVGDVGVTTIDPFKHFVGMLEKDC[330]R                                                                | 1           |
| DGAT1_HUMAN (O75907) Diacylglycerol O-acyltransferase 1 (EC 2.3.1.20) (Diglyceride acyltransferase) (ACAT-related gene product 1) [MASS=55278]                                                                                                                              | 0.00 | 3.28  | 0.85 | 0.00 | 1 | 1 | 2 | GILNWC[330]VVMLILSNAR                                                                             | 1           |
| DGKQ_HUMAN (P52824) Diacylglycerol kinase theta (EC 2.7.1.107) (Diglyceride kinase theta) (DGK-theta) (DAG kinase theta) [MASS=101403]                                                                                                                                      | *    | 2.65  | *    | *    | * |   | 2 | 2 VGLQKISHSR<br>3 HVRIPC[330]TSVAPSLVR                                                            | 1<br>1      |
| DGKZ_HUMAN (Q13574) Diacylglycerol kinase zeta (EC 2.7.1.107) (Diglyceride kinase zeta) (DGK-zeta) (DAG kinase zeta) [MASS=124122]                                                                                                                                          | *    | 1.70  | *    | *    | * |   | 1 | 2 ASGTTAGTM[147]LPTRVRPLSR                                                                        | 1           |
| DHB2_HUMAN (P37059) Estradiol 17-beta-dehydrogenase 2 (EC 1.1.1.62) (17-beta-HSD 2) (Microsomal 17-beta-hydroxysteroid dehydrogenase) (20 alpha-hydroxysteroid dehydrogenase) (20-alpha-HSD) (E2DH) [MASS=42785]                                                            | 0.00 | 8.79  | 0.83 | 0.00 | 1 | 2 | 2 | 2 SKGRLVNVSSM[147]GGGAPMER<br>2 QC[330]M[147]AVNFFGTVEVTK                                         | 1<br>1      |
| DHB4_HUMAN (P51659) Peroxisomal multifunctional enzyme type 2 (MFE-2) (D-bifunctional protein) (DBP) (17-beta-hydroxysteroid dehydrogenase 4) (17-beta-HSD 4) [Includes: D-3-hydroxyacyl-CoA dehydratase (EC 4.2.1.107) (3-alpha,7-alpha,12-alpha-trihydroxy-5 [MASS=79555] | *    | 3.13  | *    | *    | * |   | 1 | 3 IIM[147]TSSASGIYGNFGQANYSAAK                                                                    | 1           |

|                                                                                                                                                                                                                                                                    |      |       |      |      |   |   |   |                                                                                                                                             |                  |
|--------------------------------------------------------------------------------------------------------------------------------------------------------------------------------------------------------------------------------------------------------------------|------|-------|------|------|---|---|---|---------------------------------------------------------------------------------------------------------------------------------------------|------------------|
| DHCA_HUMAN (P16152) Carbonyl reductase [NADPH] 1 (EC 1.1.1.184) (NADPH-dependent carbonyl reductase 1) (Prostaglandin-E(2) 9-reductase) (EC 1.1.1.189) (Prostaglandin 9-ketoreductase) (15-hydroxyprostaglandin dehydrogenase [NADP+]) (EC 1.1.1.197) [MASS=30244] | 0.41 | 12.32 | 0.92 | 0.00 | 1 | 2 | 3 | DLC[330]RFLFSGDVLTARDVTR<br>2 DVC[330]TELLPLIKPQGR                                                                                          | 1<br>1           |
| DHDDS_HUMAN (Q86SQ9) Dehydrodolichyl diphosphate synthase (EC 2.5.1.-) (Dedol-PP synthase) [MASS=38689]                                                                                                                                                            | 0.00 | 15.62 | 0.81 | 0.00 | 1 | 3 | 2 | EGELSLWERFC[330]ANIIKAGPM[147]PK<br>2 C[330]QVERQEGHSQGFNKLAECLR<br>2 SPHPDILIR                                                             | 1<br>1<br>1      |
| DHE3_HUMAN (P00367) Glutamate dehydrogenase 1, mitochondrial precursor (EC 1.4.1.3) (GDH) [MASS=61397]                                                                                                                                                             | 1.00 | 17.74 | 2.66 | 0.02 | 6 | 5 | 2 | FTMELAKKGFIPGIDVPAPDMSTGER<br>2 AKPYEGSILEADC[339]DILIPAASEK<br>2 IIKPC[339]NHVLSLSFPIR                                                     | 1<br>1<br>2      |
| DHR11_HUMAN (Q6UWP2) Dehydrogenase/reductase SDR family member 11 precursor (EC 1.-.-) [MASS=28308]                                                                                                                                                                | *    | 22.69 | *    | *    | * | 3 | 2 | IIKPC[330]NHVLSLSFPIR<br>2 C[339]AVVDVPFGGAK<br>2 C[330]AVVDVPFGGAK<br>2 YNLGLDLRTAAYVNAIEKVFK                                              | 1<br>1<br>1<br>1 |
| DHSB_HUMAN (P21912) Succinate dehydrogenase [ubiquinone] iron-sulfur protein, mitochondrial precursor (EC 1.3.5.1) (Ip) (Iron-sulfur subunit of complex II) [MASS=31630]                                                                                           | 1.00 | 3.21  | 2.02 | 0.00 | 2 | 1 | 2 | EAYQSM[147]KERNVDDGHIINISM[147]SGHR<br>3 ALVQQGLKVVGC[330]AR<br>3 VVGC[339]ARTVGNIEELAAEC[339]K                                             | 1<br>1<br>1      |
| DHSA_HUMAN (P31040) Succinate dehydrogenase [ubiquinone] flavoprotein subunit, mitochondrial precursor (EC 1.3.5.1) (Fp) (Flavoprotein subunit of complex II) [MASS=72691]                                                                                         | 1.00 | 8.73  | 1.53 | 0.04 | 4 | 3 | 3 | HVNGQDQIVPGLYAC[339]GEAAC[339]ASVHGANR<br>2 AC[330]ALSIEESC[330]RPGDK<br>3 HVNGQDQIVPGLYAC[330]GEAAC[330]ASVHGANR<br>2 TLNEADC[339]ATVPPAIR | 1<br>1<br>1<br>1 |
| DHX30_HUMAN (Q7L2E3) Putative ATP-dependent RNA helicase DHX30 (EC 3.6.1.-) (DEAH box protein 30) [MASS=133937]                                                                                                                                                    | 0.98 | 2.18  | 1.40 | 0.00 | 1 | 2 | 2 | C[330]HTIM[147]NC[330]TR<br>2 C[339]HTIM[147]NC[339]TR                                                                                      | 1<br>1           |
| DHX57_HUMAN (Q6P158) Putative ATP-dependent RNA helicase DHX57 (EC 3.6.1.-) (DEAH box protein 57) [MASS=155603]                                                                                                                                                    | 0.00 | 2.81  | 1.67 | 0.00 | 1 | 2 | 2 | C[339]QSGFAYHLFPR<br>2 GGALLFC[330]TVGILLR                                                                                                  | 1<br>1           |
|                                                                                                                                                                                                                                                                    |      |       |      |      |   |   | 2 | KHQVVVISGM[147]TGC[339]GK<br>2 SHASKSHGSGGGGGGGGGGGGNR                                                                                      | 1<br>2           |

|                                                                                                                                                                          |      |       |      |      |   |   |   |   |   |                                                                                                                                                            |                       |
|--------------------------------------------------------------------------------------------------------------------------------------------------------------------------|------|-------|------|------|---|---|---|---|---|------------------------------------------------------------------------------------------------------------------------------------------------------------|-----------------------|
| DHX8_HUMAN (Q14562) ATP-dependent RNA helicase DHX8 (EC 3.6.1.-) (DEAH box protein 8) (RNA helicase HRH1) [MASS=139314]                                                  | *    | 2.62  | *    | *    | * | 2 | 2 | 2 | 3 | QSMDSPIKIVK<br>ASLVKNGAEFTDSLISNLLR                                                                                                                        | 1<br>1                |
| DHX9_HUMAN (Q08211) ATP-dependent RNA helicase A (EC 3.6.1.-) (Nuclear DNA helicase II) (NDH II) (DEAH box protein 9) [MASS=140880]                                      | 0.66 | 3.86  | 0.74 | 0.00 | 1 | 2 | 3 | 3 | 3 | VILSTNIAETSITINDVVYVIDSC[339]K<br>GATGC[339]GKTTQVPQFILDDEFIQNDR                                                                                           | 1<br>1                |
| DIAP3_HUMAN (Q9NSV4) Protein diaphanous homolog 3 (Diaphanous-related formin-3) (DRF3) [MASS=127594]                                                                     | 0.00 | 2.43  | *    | *    | * | 2 | 2 | 3 | 3 | M[147]M[147]EDM[147]NLNEDKK<br>AVDPRHPNM[147]MTDVVK                                                                                                        | 1<br>1                |
| DISC1_HUMAN (Q9NRI5) Disrupted in schizophrenia 1 protein [MASS=93582]                                                                                                   | *    | 3.28  | *    | *    | * | 1 | 3 | 2 | 3 | VNDIETQLPALLEAKM[147]HAISGNHFWTAK<br>QGDINASDFLALVEK<br>IITDFLM[147]PLTR                                                                                   | 1<br>1<br>2           |
| DJBP_HUMAN (Q5THR3) DJ-1-binding protein (CAP-binding protein complex-interacting protein 1) [MASS=172929]                                                               | *    | 4.06  | *    | *    | * | 5 | 3 | 2 | 2 | LLGSASSEDIWR<br>NESHKENIITKLFK<br>LKYPDFLSR                                                                                                                | 1<br>1<br>1           |
| DLDH_HUMAN (P09622) Dihydrolipoyl dehydrogenase, mitochondrial precursor (EC 1.8.1.4) (Dihydrolipoamide dehydrogenase) (Glycine cleavage system L protein) [MASS=54150]  | 1.00 | 9.04  | 1.44 | 0.03 | 3 | 2 | 2 | 3 | 3 | VC[330]HAHPTLSEAFK<br>VLGAHILGPGAGEMVNEAALALEYGASC[339]EDIAR<br>VLGAHILGPGAGEM[147]VNEAALALEYGASC[330]EDIAR<br>VLGAHILGPGAGEM[147]VNEAALALEYGASC[339]EDIAR | 1<br>1<br>1<br>1      |
| DMAP1_HUMAN (Q9NPF5) DNA methyltransferase 1-associated protein 1 (DNMT1-associated protein 1) (DNMAP1) [MASS=52992]                                                     | 0.00 | 10.28 | 0.38 | 0.00 | 1 | 2 | 3 | 2 | 2 | SDLVLLYELKQAC[330]ANC[330]EYELQM[147]LRHR<br>QAC[339]ANC[339]EYELQM[147]LRHRHEALAR                                                                         | 1<br>1                |
| DMBT1_HUMAN (Q9UGM3) Deleted in malignant brain tumors 1 protein precursor (Glycoprotein 340) (Gp-340) (Surfactant pulmonary-associated D-binding protein) [MASS=260734] | *    | 1.24  | *    | *    | * | 1 | 3 | 2 | 3 | PDTLSTITLPPSTVGSSESLTLRLVNGSDR<br>FRPSKM[147]SC[339]R<br>QSNSSSGLHPPKK<br>AGC[339]PMLALEVLSK<br>FEHSAAFFLLAGC[339]LR                                       | 1<br>1<br>1<br>1<br>1 |
| DMXL1_HUMAN (Q9Y485) Protein DmX-like 1 (X-like 1 protein) [MASS=337852]                                                                                                 | 0.00 | 1.65  | 1.20 | 0.00 | 1 | 4 | 3 | 3 | 3 | SSVLVTHAELMPDQTAMHEVQR<br>VLPNAFNIPNRILDIL<br>HAVKFGDTEADSSNAEEAAM[147]QDHSTFK<br>GSVC[330]NVLLTSC[330]HDGVC[330]R<br>LVYSQPLDLPESVEVIR                    | 1<br>1<br>1<br>1<br>1 |
| DMXL2_HUMAN (Q8TDJ6) Protein DmX-like 2 (Rabconnectin-3) [MASS=339755]                                                                                                   | 0.00 | 3.26  | 0.40 | 0.00 | 1 | 5 | 3 | 3 | 3 | HAVKFGDTEADSSNAEEAAM[147]QDHSTFK<br>GSVC[330]NVLLTSC[330]HDGVC[330]R<br>LVYSQPLDLPESVEVIR                                                                  | 1<br>1<br>1           |

|                                                                                                                                                                                                        |                            |      |      |      |   |   |   |                                          |   |
|--------------------------------------------------------------------------------------------------------------------------------------------------------------------------------------------------------|----------------------------|------|------|------|---|---|---|------------------------------------------|---|
| DNJA2_HUMAN (O60884) DnaJ homolog subfamily A member 2 (HIRA-interacting protein 4) (Cell cycle progression restoration gene 3 protein) (Dnj3) (NY-REN-14 antigen) [MASS=45745]                        | 0.00                       | 6.07 | 1.40 | 0.00 | 1 | 2 | 2 | IGLVEALC[339]GFQFTFK                     | 1 |
|                                                                                                                                                                                                        |                            |      |      |      |   |   | 2 | DGNDLHM[147]TYK                          | 6 |
| DNL4_HUMAN (P49917) DNA ligase 4 (EC 6.5.1.1) (DNA ligase IV) (Polydeoxyribonucleotide synthase [ATP] 4) [MASS=103970]                                                                                 | *                          | 0.88 | *    | *    | * | 1 | 2 | IEKIRDDK                                 | 1 |
| DNM3L_HUMAN (Q9UJW3) DNA (cytosine-5)-methyltransferase 3-like [MASS=43670]                                                                                                                            | *                          | 4.91 | *    | *    | * | 1 | 2 | PGSPRPFFWMFVDNLVLNK                      | 1 |
| DNS2B_HUMAN (Q8WZ79) Deoxyribonuclease-2-beta precursor (EC 3.1.22.1) (Deoxyribonuclease II beta) (DNase II beta) (DNase2-like acid DNase) (DNase II-like acid DNase) (Endonuclease DLAD) [MASS=41712] | *                          | 3.32 | *    | *    | * | 1 | 3 | AVDWFTFYKLPK                             | 1 |
| DOC10_HUMAN (Q96BY6) Dedicator of cytokinesis protein 10 (Protein zizimin 3) [MASS=249311]                                                                                                             | *                          | 0.60 | *    | *    | * | 1 | 3 | LGKYRMPFAWAVR                            | 2 |
| DOCK1_HUMAN (Q14185) Dedicator of cytokinesis protein 1 (180 kDa protein downstream of CRK) (DOCK180) [MASS=215374]                                                                                    | 0.00                       | 5.15 | 1.19 | 0.00 | 1 | 5 | 3 | M[147]SC[330]TVNVLNFYKEIEREEMYIR         | 1 |
|                                                                                                                                                                                                        |                            |      |      |      |   |   | 2 | LTSGLRPFVAVM[147]DVTDIINGK               | 1 |
|                                                                                                                                                                                                        |                            |      |      |      |   |   | 3 | VKGAALKYLPTIVNDVK                        | 1 |
|                                                                                                                                                                                                        |                            |      |      |      |   |   | 2 | NVYFPDWWIM[147]NMVQNKVFLR                | 1 |
|                                                                                                                                                                                                        |                            |      |      |      |   |   | 3 | TIYTTAYKLPGILR                           | 1 |
| DOCK4_HUMAN (Q8N110) Dedicator of cytokinesis protein 4 [MASS=225147]                                                                                                                                  | 0.00                       | 3.36 | 1.70 | 0.00 | 1 | 3 | 3 | YGDM[147]RVTMGC[339]EIFSMWQNLGEHK        | 1 |
|                                                                                                                                                                                                        |                            |      |      |      |   |   | 2 | GEKKLFGFSFVPLM[147]QEDGR                 | 1 |
|                                                                                                                                                                                                        |                            |      |      |      |   |   | 3 | EYAM[147]VDPEDISITELYRLMEHRHR            | 1 |
| DOCK8_HUMAN (Q8NF50) Dedicator of cytokinesis protein 8 [MASS=230819]                                                                                                                                  | 0.00                       | 7.63 | 0.06 | 0.00 | 1 | 7 | 3 | LEISTAPEIINC[339]C[330]LTPEMLPVKPFPENRTR | 1 |
|                                                                                                                                                                                                        |                            |      |      |      |   |   | 3 | VKMQVTMSLASLVGRAPDFNEEHLR                | 1 |
|                                                                                                                                                                                                        |                            |      |      |      |   |   | 3 | IAKSYQASPDLRLTWLQNM[147]AEK              | 1 |
|                                                                                                                                                                                                        |                            |      |      |      |   |   | 2 | VLQQGEIGDC[330]AEPYTVIKESDGGKSK          | 1 |
|                                                                                                                                                                                                        |                            |      |      |      |   |   | 2 | NADQSLIRK                                | 1 |
| 3                                                                                                                                                                                                      | LLQARVMSSSNPDLAGTHSAADEEVK | 1    |      |      |   |   |   |                                          |   |
| 2                                                                                                                                                                                                      | FFTLC[339]HSLESQVTFPIR     | 1    |      |      |   |   |   |                                          |   |
| DOK3_HUMAN (Q7L591) Docking protein 3 (Downstream of tyrosine kinase 3) [MASS=53288]                                                                                                                   | 0.00                       | 3.43 | 4.90 | 0.00 | 1 | 1 | 2 | LADC[339]VSVLPADGESG[339]PR              | 1 |

|                                                                                                                                                                                                                      |      |       |      |      |   |   |                                                                                                                                            |                       |   |
|----------------------------------------------------------------------------------------------------------------------------------------------------------------------------------------------------------------------|------|-------|------|------|---|---|--------------------------------------------------------------------------------------------------------------------------------------------|-----------------------|---|
| DPP6_HUMAN (P42658) Dipeptidyl aminopeptidase-like protein 6 (Dipeptidylpeptidase VI) (Dipeptidylpeptidase 6) (Dipeptidyl peptidase IV-like protein) (Dipeptidyl aminopeptidase-related protein) (DPPX) [MASS=97587] | *    | 1.85  | *    | *    | * | 1 | 3                                                                                                                                          | MREYYITM[147]VKWATSTK | 2 |
| DPYL2_HUMAN (Q16555) Dihydropyrimidinase-related protein 2 (DRP-2) (Collapsin response mediator protein 2) (CRMP-2) (N2A3) [MASS=62293]                                                                              | 1.00 | 12.41 | 0.58 | 0.14 | 3 | 4 | 2 M[147]SVIWDKAVVTGK<br>2 FQLTDC[330]QIYEVLSVIR<br>2 THNSSLEYNIFEGM[147]EC[339]R<br>2 FQLTDC[339]QIYEVLSVIR<br>3 GIQEEMEALVKDHGVNSFLVYMAFK | 1<br>1<br>1<br>1<br>1 |   |
| DRP2_HUMAN (Q13474) Dystrophin-related protein 2 [MASS=107673]                                                                                                                                                       | 0.00 | 5.03  | 0.98 | 0.00 | 1 | 2 | 3 GYLPVQSVLEADYSETPASSPMWPHADTHSR<br>2 C[339]HDWQAADQFHSSSLR                                                                               | 1<br>1                |   |
| DSC1_HUMAN (Q08554) Desmocollin-1 precursor (Desmosomal glycoprotein 2/3) (DG2/DG3) [MASS=100044]                                                                                                                    | *    | 6.71  | *    | *    | * | 2 | 3 LPM[147]QTSNIC[339]DTSM[147]SVGTVGGQGIKTQQSFEM[147]VK<br>3 ILQGNENGNFIISTDPNTNEGVLC[330]VVK                                              | 1<br>1                |   |
| DUET_HUMAN (Q9Y2A5) Serine/threonine-protein kinase Duet (EC 2.7.11.1) (Serine/threonine kinase with Dbl- and pleckstrin homology domain) [MASS=144412]                                                              | 0.78 | 5.97  | 1.15 | 0.24 | 2 | 5 | 2 QNDLGGC[339]NGTSSMAVIK<br>3 DLGIVVEGFMKRIEEK<br>2 ERSTAVMRSQPAR<br>3 HERKLHIYVWYC[339]QNK<br>2 MNYLVLEENVNDNDPC[339]K                    | 1<br>1<br>1<br>1<br>1 |   |
| DUS23_HUMAN (Q9BVJ7) Dual specificity protein phosphatase 23 (EC 3.1.3.48) (EC 3.1.3.16) (Low molecular mass dual specificity phosphatase 3) (LDP-3) (VH1-like phosphatase Z) [MASS=16588]                           | *    | 14.00 | *    | *    | * | 1 | 3 LRPGETIYEQEKAQVQFYQR                                                                                                                     | 1                     |   |
| DX26B_HUMAN (Q5JSJ4) Protein DDX26B [MASS=96672]                                                                                                                                                                     | 0.00 | 8.01  | 0.71 | 0.00 | 1 | 4 | 3 KSPHTC[330]WQVFVTSSGKYNELGYPFYGLK<br>3 NLQASGLTTLGQALR<br>2 WDQRLFALVLR<br>3 IFILLEEVQGPLEMK                                             | 1<br>1<br>1<br>1      |   |
| DYH5_HUMAN (Q8TE73) Ciliary dynein heavy chain 5 (Axonemal beta dynein heavy chain 5) (HL1) [MASS=529002]                                                                                                            | 0.00 | 1.02  | 1.32 | 0.00 | 1 | 3 | 3 C[339]YITLAQALGM[147]SMGGAPAGPAGTGK<br>2 NIM[147]EAPLLK<br>3 THLM[147]EDVTANKRR                                                          | 1<br>1<br>2           |   |



|                                                                                                                                                                                                  |                                     |       |      |      |   |   |                                                                                                                                                        |                                      |      |
|--------------------------------------------------------------------------------------------------------------------------------------------------------------------------------------------------|-------------------------------------|-------|------|------|---|---|--------------------------------------------------------------------------------------------------------------------------------------------------------|--------------------------------------|------|
| DYH9_HUMAN (Q9NYC9) Ciliary dynein heavy chain 9 (Axonemal beta dynein heavy chain 9) [MASS=511928]                                                                                              | *                                   | 3.28  | *    | *    | * | 8 | 3                                                                                                                                                      | LAAFISSMDVFQITLR                     | 1    |
|                                                                                                                                                                                                  |                                     |       |      |      |   |   | 2                                                                                                                                                      | LVGGLASENVRWADAVQNFK                 | 1    |
|                                                                                                                                                                                                  |                                     |       |      |      |   |   | 2                                                                                                                                                      | TLITM[147]LIGQLSKGDRQK               | 1    |
|                                                                                                                                                                                                  |                                     |       |      |      |   |   | 3                                                                                                                                                      | VQRMMGLC[330]C[330]GYQSTFSQYSYLYVEDR | 1    |
|                                                                                                                                                                                                  |                                     |       |      |      |   |   | 3                                                                                                                                                      | LANPHYQPELQAQATLINFTVTR              | 1    |
|                                                                                                                                                                                                  |                                     |       |      |      |   |   | 3                                                                                                                                                      | PGLEVGPESEGLAGAK                     | 1    |
|                                                                                                                                                                                                  |                                     |       |      |      |   |   | 3                                                                                                                                                      | TLITM[147]LIGQLSKGDRQK               | 1    |
|                                                                                                                                                                                                  |                                     |       |      |      |   |   | 2                                                                                                                                                      | EM[147]SYLEPR                        | 1    |
|                                                                                                                                                                                                  |                                     |       |      |      |   |   | 2                                                                                                                                                      | C[339]TAFDAEQQFWEQFHKEAPFR           | 1    |
|                                                                                                                                                                                                  |                                     |       |      |      |   |   | DYHC_HUMAN (Q14204) Dynein heavy chain, cytosolic (DYHC) (Cytoplasmic dynein heavy chain 1) (DHC1) (Dynein heavy chain 1, cytoplasmic 1) [MASS=532404] | 0.96                                 | 4.00 |
| 3                                                                                                                                                                                                | IPWSALKTLM[147]AQSIYGGR             | 1     |      |      |   |   |                                                                                                                                                        |                                      |      |
| 3                                                                                                                                                                                                | LRDQLGTAKNANEM[147]FR               | 1     |      |      |   |   |                                                                                                                                                        |                                      |      |
| 2                                                                                                                                                                                                | NYM[147]SNPSYNYEIVNRASLAC[339]GPMVK | 1     |      |      |   |   |                                                                                                                                                        |                                      |      |
| 2                                                                                                                                                                                                | QLQNISLAAASGGAKELK                  | 1     |      |      |   |   |                                                                                                                                                        |                                      |      |
| 3                                                                                                                                                                                                | QELEQHSVDTASTSDAVTFITYVQSLKR        | 1     |      |      |   |   |                                                                                                                                                        |                                      |      |
| 3                                                                                                                                                                                                | LLAESVTEVEIFGK                      | 1     |      |      |   |   |                                                                                                                                                        |                                      |      |
| 2                                                                                                                                                                                                | HLRKLVPILLEDGGEAPAALEALEEK          | 1     |      |      |   |   |                                                                                                                                                        |                                      |      |
| 2                                                                                                                                                                                                | EGEEVM[147]FKTPVSITEHPK             | 1     |      |      |   |   |                                                                                                                                                        |                                      |      |
| 2                                                                                                                                                                                                | C[330]YLTM[147]TQALEAR              | 1     |      |      |   |   |                                                                                                                                                        |                                      |      |
| DYL1_HUMAN (P63167) Dynein light chain 1, cytoplasmic (Dynein light chain LC8-type 1) (8 kDa dynein light chain) (DLC8) (Protein inhibitor of neuronal nitric oxide synthase) (PIN) [MASS=10366] | *                                   | 24.72 | *    | *    | * | 1 | 2                                                                                                                                                      | NADMSEEMQQDSVEC[339]ATQALEK          | 1    |
| DYL3_HUMAN (P51808) Dynein light chain Tctex-type 3 (T-complex-associated testis-expressed 1-like) (Protein 91/23) [MASS=13062]                                                                  | 0.00                                | 14.66 | 0.53 | 0.00 | 1 | 1 | 2                                                                                                                                                      | HC[330]DEVGFNAEEAHNIVK               | 1    |
| DYN1_HUMAN (Q05193) Dynamin-1 (EC 3.6.5.5) [MASS=97407]                                                                                                                                          | 1.00                                | 1.62  | 1.01 | 0.30 | 2 | 1 | 2                                                                                                                                                      | C[339]VDM[147]VISELISTVR             | 1    |
|                                                                                                                                                                                                  |                                     |       |      |      |   |   | 2                                                                                                                                                      | C[330]VDM[147]VISELISTVR             | 1    |
| DYN3_HUMAN (Q9UQ16) Dynamin-3 (EC 3.6.5.5) (Dynamin, testicular) (T-dynamin) [MASS=96681]                                                                                                        | 0.33                                | 3.26  | 0.53 | 0.00 | 1 | 2 | 2                                                                                                                                                      | AEYAEFLHC[330]K                      | 1    |
|                                                                                                                                                                                                  |                                     |       |      |      |   |   | 3                                                                                                                                                      | NKLQGQLLSIEHEVEAYK                   | 1    |
| DYRL1_HUMAN (Q86XF0) Dihydrofolate reductase-like protein 1 [MASS=21620]                                                                                                                         | *                                   | 3.74  | *    | *    | * | 1 | 1                                                                                                                                                      | SLDDALK                              | 1    |
| EAA2_HUMAN (P43004) Excitatory amino acid transporter 2 (Sodium-dependent glutamate/aspartate transporter 2) [MASS=62104]                                                                        | 1.00                                | 9.06  | 0.43 | 0.30 | 5 | 3 | 2                                                                                                                                                      | C[330]LEENLGIDKR                     | 1    |
|                                                                                                                                                                                                  |                                     |       |      |      |   |   | 2                                                                                                                                                      | NLFPENLVQAC[330]FQIQITVTK            | 2    |
|                                                                                                                                                                                                  |                                     |       |      |      |   |   | 3                                                                                                                                                      | ESNSNQC[330]VYAAHNSVIVDEC[330]K      | 1    |
|                                                                                                                                                                                                  |                                     |       |      |      |   |   | 2                                                                                                                                                      | NLFPENLVQAC[339]FQIQITVTK            | 1    |

|                                                                                                                                                                                                                                                              |      |       |      |      |   |   |   |                                           |   |
|--------------------------------------------------------------------------------------------------------------------------------------------------------------------------------------------------------------------------------------------------------------|------|-------|------|------|---|---|---|-------------------------------------------|---|
| ECH1_HUMAN (Q13011) Delta3,5-delta2,4-dienoyl-CoA isomerase, mitochondrial precursor (EC 5.3.3.-) [MASS=35816]                                                                                                                                               | *    | 4.88  | *    | *    | * | 1 | 3 | SPVAVQSTKVNLLYSR                          | 1 |
|                                                                                                                                                                                                                                                              |      |       |      |      |   |   | 2 | SPVAVQSTKVNLLYSR                          | 1 |
| ECHA_HUMAN (P40939) Trifunctional enzyme subunit alpha, mitochondrial precursor (TP-alpha) (78 kDa gastrin-binding protein) [Includes: Long-chain enoyl-CoA hydratase (EC 4.2.1.17); Long chain 3-hydroxyacyl-CoA dehydrogenase (EC 1.1.1.211)] [MASS=82999] | 1.00 | 11.53 | 1.29 | 0.10 | 3 | 4 | 2 | EVEAIPDHC[339]IFASNTSALPISEIAAVSK         | 1 |
|                                                                                                                                                                                                                                                              |      |       |      |      |   |   | 2 | QFTPC[339]QLLADHANSFNKK                   | 1 |
|                                                                                                                                                                                                                                                              |      |       |      |      |   |   | 2 | ALM[147]GLYHGQVLC[339]K                   | 1 |
|                                                                                                                                                                                                                                                              |      |       |      |      |   |   | 3 | QFTPC[330]QLLADHANSFNKK                   | 1 |
|                                                                                                                                                                                                                                                              |      |       |      |      |   |   | 3 | KLDSLTTSGFPVGAATLVDEVGVDVAK               | 1 |
| ECHM_HUMAN (P30084) Enoyl-CoA hydratase, mitochondrial precursor (EC 4.2.1.17) (Short chain enoyl-CoA hydratase) (SCEH) (Enoyl-CoA hydratase 1) [MASS=31387]                                                                                                 | 0.99 | 6.21  | 1.07 | 0.00 | 1 | 1 | 2 | ALNALC[330]DGLIDELNQALK                   | 1 |
|                                                                                                                                                                                                                                                              |      |       |      |      |   |   | 2 | VC[339]HKGHDC[330]K                       | 1 |
|                                                                                                                                                                                                                                                              |      |       |      |      |   |   | 3 | WFWSIVEKMSM[147]TER                       | 1 |
| EDD1_HUMAN (O95071) Ubiquitin-protein ligase EDD1 (EC 6.3.2.-) (Hyperplastic discs protein homolog) (hHYD) (Progesterin-induced protein) [MASS=309350]                                                                                                       | *    | 4.50  | *    | *    | * | 7 | 3 | ATLLSARQGMMSARGDFLNYALSLM[147]R           | 1 |
|                                                                                                                                                                                                                                                              |      |       |      |      |   |   | 3 | DLLIQQTMRQLNNHFGR                         | 1 |
|                                                                                                                                                                                                                                                              |      |       |      |      |   |   | 3 | NIGRILGLC[339]LLQNELC[330]PITLNR          | 1 |
|                                                                                                                                                                                                                                                              |      |       |      |      |   |   | 3 | TEMGPPSPASTC[330]SDASSIASSASM[147]PYK     | 1 |
|                                                                                                                                                                                                                                                              |      |       |      |      |   |   | 3 | ATLLSARQGM[147]M[147]SARGDFLNYALSLM[147]R | 1 |
|                                                                                                                                                                                                                                                              |      |       |      |      |   |   | 3 | SLRLREM[147]MR                            | 1 |
| EF1A1_HUMAN (P68104) Elongation factor 1-alpha 1 (EF-1-alpha-1) (Elongation factor 1 A-1) (eEF1A-1) (Elongation factor Tu) (EF-Tu) [MASS=50141]                                                                                                              | 1.00 | 7.58  | 1.38 | 0.09 | 2 | 2 | 2 | C[339]GGIDKR                              | 1 |
|                                                                                                                                                                                                                                                              |      |       |      |      |   |   | 3 | DGNASGTTLLEALDC[339]ILPPTRPTDKPLR         | 1 |
| EF1G_HUMAN (P26641) Elongation factor 1-gamma (EF-1-gamma) (eEF-1B gamma) [MASS=49987]                                                                                                                                                                       | 0.00 | 5.05  | 2.11 | 0.00 | 1 | 1 | 3 | AAAPAPEEEM[147]DEC[330]EQALAAEPK          | 1 |
| EFNB3_HUMAN (Q15768) Ephrin-B3 precursor (EPH-related receptor tyrosine kinase ligand 8) (LERK-8) (EPH-related receptor transmembrane ligand ELK-L3) [MASS=35835]                                                                                            | 0.00 | 4.12  | 0.33 | 0.00 | 1 | 1 | 2 | EGLESLQGGVC[330]LTR                       | 1 |
| EFTS_HUMAN (P43897) Elongation factor Ts, mitochondrial precursor (EF-Ts) (EF-TsMt) [MASS=35390]                                                                                                                                                             | *    | 5.23  | *    | *    | * | 1 | 3 | DQLALAIGKLGEMN[147]ILK                    | 1 |

|                                                                                                                                                                                                                                                    |                      |       |      |      |    |   |   |                                         |   |
|----------------------------------------------------------------------------------------------------------------------------------------------------------------------------------------------------------------------------------------------------|----------------------|-------|------|------|----|---|---|-----------------------------------------|---|
| EFTU_HUMAN (P49411) Elongation factor Tu, mitochondrial precursor (EF-Tu) (P43) [MASS=49541]                                                                                                                                                       | 1.00                 | 14.60 | 1.39 | 0.05 | 10 | 4 | 2 | GEETPVIVGSALC[330]ALEGRDPELGLK          | 1 |
|                                                                                                                                                                                                                                                    |                      |       |      |      |    |   | 2 | KGDEC[330]ELLGHSK                       | 1 |
|                                                                                                                                                                                                                                                    |                      |       |      |      |    |   | 3 | KGDEC[330]ELLGHSK                       | 1 |
|                                                                                                                                                                                                                                                    |                      |       |      |      |    |   | 2 | KGDEC[339]ELLGHSK                       | 1 |
|                                                                                                                                                                                                                                                    |                      |       |      |      |    |   | 3 | HYAHTDC[339]PGHADYVK                    | 2 |
| 2                                                                                                                                                                                                                                                  | HYAHTDC[339]PGHADYVK | 2     |      |      |    |   |   |                                         |   |
| EGLN_HUMAN (P17813) Endoglin precursor (CD105 antigen) [MASS=70578]                                                                                                                                                                                | *                    | 4.41  | *    | *    | *  | 1 | 3 | M[147]LNASIVASFVELPLASIVSLHASSC[339]GGR | 1 |
|                                                                                                                                                                                                                                                    |                      |       |      |      |    |   | 2 | GTVVTGTLERGILK                          | 1 |
|                                                                                                                                                                                                                                                    |                      |       |      |      |    |   | 2 | HYAHTDC[330]PGHADYVK                    | 1 |
| 3                                                                                                                                                                                                                                                  | KGDEC[339]ELLGHSK    | 1     |      |      |    |   |   |                                         |   |
| ELF2_HUMAN (Q15723) ETS-related transcription factor Elf-2 (E74-like factor 2) (New ETS-related factor) [MASS=63966]                                                                                                                               | *                    | 5.23  | *    | *    | *  | 2 | 3 | VAMQVPVMTSLGQK                          | 1 |
|                                                                                                                                                                                                                                                    |                      |       |      |      |    |   | 2 | NSSPINC[330]SRAEKGVAR                   | 1 |
| ENC1_HUMAN (O14682) Ectoderm-neural cortex 1 protein (ENC-1) (p53-induced protein 10) (Nuclear matrix protein NRP/B) [MASS=66129]                                                                                                                  | *                    | 3.40  | *    | *    | *  | 1 | 3 | WTMVAPLREGVSNAAVVSAK                    | 1 |
| ENDD1_HUMAN (O94919) Endonuclease domain-containing 1 protein precursor (EC 3.1.30.-) [MASS=55016]                                                                                                                                                 | 0.00                 | 5.00  | 0.74 | 0.00 | 1  | 1 | 3 | LLPFNPQLFQNNC[330]GETEQDTEKMKK          | 1 |
| ENOA_HUMAN (P06733) Alpha-enolase (EC 4.2.1.11) (2-phospho-D-glycerate hydro-lyase) (Non-neural enolase) (NNE) (Enolase 1) (Phosphopyruvate hydratase) (C-myc promoter-binding protein) (MBP-1) (MPB-1) (Plasminogen-binding protein) [MASS=47037] | 1.00                 | 11.55 | 0.75 | 0.04 | 4  | 4 | 2 | SGETEDTFIADLVVGLC[330]TGQIK             | 1 |
|                                                                                                                                                                                                                                                    |                      |       |      |      |    |   | 2 | SGETEDTFIADLVVGLC[339]TGQIK             | 1 |
|                                                                                                                                                                                                                                                    |                      |       |      |      |    |   | 2 | VVIGM[147]DVAASEFFR                     | 1 |
|                                                                                                                                                                                                                                                    |                      |       |      |      |    |   | 2 | TGAPC[330]R                             | 1 |
|                                                                                                                                                                                                                                                    |                      |       |      |      |    |   | 2 | SC[330]NC[330]LLLK                      | 1 |
| ENP2_HUMAN (Q9Y5L3) Ectonucleoside triphosphate diphosphohydrolase 2 (EC 3.6.1.-) (NTPDase2) (Ecto-ATPase) (CD39 antigen-like 1) [MASS=53665]                                                                                                      | *                    | 13.13 | *    | *    | *  | 3 | 3 | YGIVLDAGSSHTSM[147]FIYKWPADK            | 1 |
|                                                                                                                                                                                                                                                    |                      |       |      |      |    |   | 3 | VLSGSSDPHLC[339]R                       | 4 |
|                                                                                                                                                                                                                                                    |                      |       |      |      |    |   | 3 | VLSGSSDPHLC[330]RDLVSGLFSFSSC[339]PFSR  | 1 |

|                                                                                                                                                                                                                                                                             |      |      |      |      |   |   |   |                                                 |   |
|-----------------------------------------------------------------------------------------------------------------------------------------------------------------------------------------------------------------------------------------------------------------------------|------|------|------|------|---|---|---|-------------------------------------------------|---|
| ENPP1_HUMAN (P22413) Ectonucleotide pyrophosphatase/phosphodiesterase 1 (E-NPP1) (Phosphodiesterase I/nucleotide pyrophosphatase 1) (Plasma-cell membrane glycoprotein PC-1) [Includes: Alkaline phosphodiesterase I (EC 3.1.4.1); Nucleotide pyrophosphatase [MASS=104924] | 0.00 | 5.84 | 1.06 | 0.00 | 1 | 4 | 2 | EGPAGNGRDR                                      | 1 |
|                                                                                                                                                                                                                                                                             |      |      |      |      |   |   | 2 | ITDVEHITGLSFYQQRKEPVSDILK                       | 1 |
|                                                                                                                                                                                                                                                                             |      |      |      |      |   |   | 2 | MYDPKM[147]NASFSLK                              | 1 |
|                                                                                                                                                                                                                                                                             |      |      |      |      |   |   | 2 | TFGNC[330]R                                     | 1 |
| EOMES_HUMAN (O95936) Eomesodermin homolog [MASS=72612]                                                                                                                                                                                                                      | 0.31 | 2.48 | 1.82 | 0.00 | 1 | 1 | 2 | SLDSNDSGVYTSAC[339]KRR                          | 1 |
| EPHA4_HUMAN (P54764) Ephrin type-A receptor 4 precursor (EC 2.7.10.1) (Tyrosine-protein kinase receptor SEK) (Receptor protein-tyrosine kinase HEK8) [MASS=109859]                                                                                                          | 0.00 | 4.56 | 0.47 | 0.00 | 1 | 3 | 3 | VIGVGEFGEVC[330]SGR                             | 1 |
|                                                                                                                                                                                                                                                                             |      |      |      |      |   |   | 3 | DC[339]NSLPGVM[147]GTC[339]K                    | 1 |
|                                                                                                                                                                                                                                                                             |      |      |      |      |   |   | 2 | IDTIAADESFTQVDIGDR                              | 1 |
| EPHA5_HUMAN (P54756) Ephrin type-A receptor 5 precursor (EC 2.7.10.1) (Tyrosine-protein kinase receptor EHK-1) (EPH homology kinase 1) (Receptor protein-tyrosine kinase HEK7) [MASS=114784]                                                                                | *    | 1.54 | *    | *    | * | 1 | 2 | DYFRRESDPPTM[147]AC[339]TR                      | 1 |
| EPHA6_HUMAN (Q9UF33) Ephrin type-A receptor 6 precursor (EC 2.7.10.1) (Tyrosine-protein kinase receptor EHK-2) (EPH homology kinase 2) [MASS=116116]                                                                                                                        | *    | 8.12 | *    | *    | * | 4 | 3 | C[330]SKC[330]PPHSLTYM[147]EATSVC[330]QC[339]EK | 1 |
|                                                                                                                                                                                                                                                                             |      |      |      |      |   |   | 2 | PFTAITVTTDHDAPSLIGM[147]MR                      | 1 |
|                                                                                                                                                                                                                                                                             |      |      |      |      |   |   | 2 | GYFRAEKDPPSM[147]AC[339]TGPPSAPR                | 1 |
|                                                                                                                                                                                                                                                                             |      |      |      |      |   |   | 2 | PVM[147]IVVEYM[147]ENGLDLSFLR                   | 1 |
|                                                                                                                                                                                                                                                                             |      |      |      |      |   |   | 3 | PVMIVVEYMENGLDLSFLR                             | 1 |
| EPHA7_HUMAN (Q15375) Ephrin type-A receptor 7 precursor (EC 2.7.10.1) (Tyrosine-protein kinase receptor EHK-3) (EPH homology kinase 3) (Receptor protein-tyrosine kinase HEK11) [MASS=112082]                                                                               | *    | 5.91 | *    | *    | * | 3 | 2 | ENLYVKIDTIAADESFTQGDGGERK                       | 1 |
|                                                                                                                                                                                                                                                                             |      |      |      |      |   |   | 2 | GKPMIVIEFMENGALDAFLR                            | 1 |
|                                                                                                                                                                                                                                                                             |      |      |      |      |   |   | 2 | AQMLHLHGTGIQV                                   | 1 |
| ERAL_HUMAN (O75616) GTP-binding protein era homolog (hERA) (ERA-W) (Conserved ERA-like GTPase) (CEGA) [MASS=48350]                                                                                                                                                          | 0.00 | 8.01 | *    | *    | * | 2 | 2 | C[330]VSC[339]VAGSAFSGPR                        | 1 |
|                                                                                                                                                                                                                                                                             |      |      |      |      |   |   | 2 | RC[330]VSC[330]VAGSAFSGPRLASASR                 | 1 |
| ERBB3_HUMAN (P21860) Receptor tyrosine-protein kinase erbB-3 precursor (EC 2.7.10.1) (c-erbB3) (Tyrosine kinase-type cell surface receptor HER3) [MASS=148097]                                                                                                              | *    | 1.12 | *    | *    | * | 1 | 3 | NGLKM[147]C[339]EPC[330]GGLC[330]PK             | 1 |

|                                                                                                                                                                                                                                                                              |      |       |      |      |   |   |   |                                           |   |
|------------------------------------------------------------------------------------------------------------------------------------------------------------------------------------------------------------------------------------------------------------------------------|------|-------|------|------|---|---|---|-------------------------------------------|---|
| ERCC3_HUMAN (P19447) TFIIH basal transcription factor complex helicase XPB subunit (EC 3.6.1.-) (Basic transcription factor 2 89 kDa subunit) (BTF2-p89) (TFIIH 89 kDa subunit) (DNA-repair protein complementing XP-B cells) (Xeroderma pigmentosum group B-c [MASS=89277]) | 0.00 | 9.34  | 6.52 | 0.00 | 1 | 3 | 2 | RC[339]LVLGNSAVSVEQWKAQFK                 | 1 |
|                                                                                                                                                                                                                                                                              |      |       |      |      |   |   | 2 | LNKPYYIGPYSQGERM[147]QILQNFK              | 1 |
|                                                                                                                                                                                                                                                                              |      |       |      |      |   |   | 3 | SWEAERVM[147]EWLKTQEWGLM[147]ILDEVHTIPAK  | 1 |
| ERO1A_HUMAN (Q96HE7) ERO1-like protein alpha precursor (EC 1.8.4.-) (ERO1-Lalpha) (Oxidoreductin-1-Lalpha) (Endoplasmic oxidoreductin-1-like protein) (ERO1-L) [MASS=54392]                                                                                                  | *    | 1.28  | *    | *    | * | 1 | 2 | RDC[339]AVK                               | 1 |
| ESCO1_HUMAN (Q5FWF5) N-acetyltransferase ESCO1 (EC 2.3.1.-) (Establishment of cohesion 1 homolog 1) (ECO1 homolog 1) (ESO1 homolog 1) (Establishment factor-like protein 1) (EFO1p) (hEFO1) (CTF7 homolog 1) [MASS=95008]                                                    | *    | 2.02  | *    | *    | * | 1 | 3 | ESSQM[147]ESVKEEKPTEIK                    | 1 |
| ESPL1_HUMAN (Q14674) Separin (EC 3.4.22.49) (Separase) (Caspase-like protein ESPL1) (Extra spindle poles-like 1 protein) [MASS=233112]                                                                                                                                       | 0.00 | 0.90  | 1.09 | 0.00 | 1 | 1 | 2 | YIMAGC[339]PLFLGNLWDVTDR                  | 1 |
| ETFD_HUMAN (Q16134) Electron transfer flavoprotein-ubiquinone oxidoreductase, mitochondrial precursor (EC 1.5.5.1) (ETF-QO) (ETF-ubiquinone oxidoreductase) (ETF dehydrogenase) (Electron-transferring-flavoprotein dehydrogenase) [MASS=68507]                              | 1.00 | 10.21 | 1.91 | 0.08 | 2 | 3 | 3 | WEGVNM[147]ERFAEEADVIVGAGPAGLSAAVRLK      | 1 |
|                                                                                                                                                                                                                                                                              |      |       |      |      |   |   | 2 | LQINAQNC[339]VHC[339]K                    | 1 |
|                                                                                                                                                                                                                                                                              |      |       |      |      |   |   | 2 | FC[339]PAGVYEFVPEQGDGFR                   | 1 |
| ETV7_HUMAN (Q9Y603) Transcription factor ETV7 (Transcription factor Tel-2) (ETS-related protein Tel2) (Tel-related Ets factor) [MASS=38998]                                                                                                                                  | *    | 4.40  | *    | *    | * | 1 | 2 | LWGNHKNRVM[147]TYEK                       | 1 |
| EXO1_HUMAN (Q9UQ84) Exonuclease 1 (EC 3.1.-.-) (hExo1) (Exonuclease I) (hExol) [MASS=94103]                                                                                                                                                                                  | 0.00 | 3.43  | *    | *    | * | 2 | 3 | NEESGAVVVPGTR                             | 1 |
|                                                                                                                                                                                                                                                                              |      |       |      |      |   |   | 2 | ANNTFLYQLVFDPIKR                          | 1 |
| EXOC2_HUMAN (Q96KP1) Exocyst complex component 2 (Exocyst complex component Sec5) [MASS=104066]                                                                                                                                                                              | *    | 2.81  | *    | *    | * | 1 | 3 | TQEEVC[339]QLSINIM[147]QVFIYC[339]LEQLSTK | 1 |

|                                                                                                                                                                                                                                                                             |      |       |      |      |   |   |   |                                          |    |
|-----------------------------------------------------------------------------------------------------------------------------------------------------------------------------------------------------------------------------------------------------------------------------|------|-------|------|------|---|---|---|------------------------------------------|----|
| EXT1_HUMAN (Q16394) Exostosin-1 (EC 2.4.1.224) (EC 2.4.1.225) (Glucuronosyl-N-acetylglucosaminyl-proteoglycan/N-acetylglucosaminyl-proteoglycan 4-alpha-N-acetylglucosaminyltransferase) (Putative tumor suppressor protein EXT1) (Multiple exostoses protein [MASS=86254]) | *    | 3.75  | *    | *    | * | 2 | 3 | HISRNSLIWNK                              | 1  |
|                                                                                                                                                                                                                                                                             |      |       |      |      |   |   | 3 | WTNDYSM[147]VLTGAAIYHK                   | 1  |
|                                                                                                                                                                                                                                                                             |      |       |      |      |   |   | 2 | RSC[339]TSEDKVGQSEALSR                   | 1  |
|                                                                                                                                                                                                                                                                             |      |       |      |      |   |   | 2 | PALM[147]TAIDGR                          | 10 |
| FA35A_HUMAN (Q86V20) Protein FAM35A [MASS=93704]                                                                                                                                                                                                                            | 0.00 | 9.34  | 0.97 | 0.00 | 1 | 5 |   |                                          |    |
|                                                                                                                                                                                                                                                                             |      |       |      |      |   |   | 2 | VLQVAKKMK                                | 1  |
|                                                                                                                                                                                                                                                                             |      |       |      |      |   |   | 3 | ILLNISADC[339]LNR                        | 1  |
|                                                                                                                                                                                                                                                                             |      |       |      |      |   |   | 3 | SIFSSLPNIVYTGC[330]AKC[330]GLELETDENRIYK | 1  |
| FA38A_HUMAN (Q92508) Protein FAM38A [MASS=233040]                                                                                                                                                                                                                           | *    | 0.64  | *    | *    | * | 1 | 2 | M[147]AGVNTDRLEPLR                       | 1  |
| FA47A_HUMAN (Q5JRC9) Protein FAM47A [MASS=89095]                                                                                                                                                                                                                            | 0.00 | 3.60  | 1.06 | 0.00 | 1 | 2 | 3 | APESHQFSEPPKIR                           | 1  |
|                                                                                                                                                                                                                                                                             |      |       |      |      |   |   | 2 | FC[339]PRPFETPLSHLR                      | 1  |
| FABPE_HUMAN (Q01469) Fatty acid-binding protein, epidermal (E-FABP) (Psoriasis-associated fatty acid-binding protein homolog) (PA-FABP) [MASS=15033]                                                                                                                        | *    | 15.67 | *    | *    | * | 1 | 3 | LVDSKGFDEYM[147]KELGVGIALR               | 1  |
| FACD2_HUMAN (Q9BXW9) Fanconi anemia group D2 protein (Protein FACD2) [MASS=166461]                                                                                                                                                                                          | *    | 4.83  | *    | *    | * | 4 | 3 | VRQLVMDKLSSIR                            | 1  |
|                                                                                                                                                                                                                                                                             |      |       |      |      |   |   | 2 | TLLLLHNSHAFFR                            | 1  |
|                                                                                                                                                                                                                                                                             |      |       |      |      |   |   | 3 | EKLDLQHC[330]VLPSRLQASQVK                | 1  |
|                                                                                                                                                                                                                                                                             |      |       |      |      |   |   | 3 | LPEYFFENKNSDEINIPRLIVSQLK                | 1  |
| FAK1_HUMAN (Q05397) Focal adhesion kinase 1 (EC 2.7.10.2) (FADK 1) (pp125FAK) (Protein-tyrosine kinase 2) [MASS=119232]                                                                                                                                                     | *    | 4.47  | *    | *    | * | 2 | 3 | THLGTGMERSPGAM[147]ERVVK                 | 1  |
|                                                                                                                                                                                                                                                                             |      |       |      |      |   |   | 3 | M[147]AAAYLDPNLNHTPNSSTKTHLGTGMER        | 1  |
| FAM3B_HUMAN (P58499) Protein FAM3B precursor (Cytokine-like protein 2-21) [MASS=25982]                                                                                                                                                                                      | *    | 8.94  | *    | *    | * | 1 | 2 | NNRYSGWPAEQIEGC[339]IPKER                | 1  |

|                                                                                                                                                                                                                                                                              |      |      |      |      |   |   |   |                                                      |   |
|------------------------------------------------------------------------------------------------------------------------------------------------------------------------------------------------------------------------------------------------------------------------------|------|------|------|------|---|---|---|------------------------------------------------------|---|
| FANCC_HUMAN (Q00597) Fanconi anemia group C protein (Protein FACC) [MASS=63428]                                                                                                                                                                                              | *    | 4.12 | *    | *    | * | 2 | 1 | LGIESPR                                              | 1 |
|                                                                                                                                                                                                                                                                              |      |      |      |      |   |   | 2 | M[147]YEALKEM[147]DSNTVIER                           | 1 |
| FANCM_HUMAN (Q8IYD8) Fanconi anemia group M protein (EC 3.6.1.-) (ATP-dependent RNA helicase FANCM) (Protein FACM) (Fanconi anemia-associated polypeptide of 250 kDa) (FAAP250) (Protein Hef ortholog) [MASS=232190]                                                         | *    | 1.07 | *    | *    | * | 2 | 1 | VSKEIK                                               | 1 |
|                                                                                                                                                                                                                                                                              |      |      |      |      |   |   | 2 | RVLFLTPQVMVNDLSR                                     | 1 |
| FAS_HUMAN (P49327) Fatty acid synthase (EC 2.3.1.85) [Includes: [Acyl-carrier-protein] S-acetyltransferase (EC 2.3.1.38); [Acyl-carrier-protein] S-malonyltransferase (EC 2.3.1.39); 3-oxoacyl-[acyl-carrier-protein] synthase (EC 2.3.1.41); 3-oxoacyl-[acyl- [MASS=273398] | *    | 4.94 | *    | *    | * | 6 | 3 | HFLLEEDKPEEPTAHAFVSTLTRGDLSSIR                       | 1 |
|                                                                                                                                                                                                                                                                              |      |      |      |      |   |   | 3 | LVLTSRSGIRTGYQAK                                     | 1 |
|                                                                                                                                                                                                                                                                              |      |      |      |      |   |   | 3 | VFTTVGSAEKRAYLQAR                                    | 1 |
|                                                                                                                                                                                                                                                                              |      |      |      |      |   |   | 3 | M[147]ASC[330]LEVLDLFLNQPHMVLSSFVLAEK                | 1 |
|                                                                                                                                                                                                                                                                              |      |      |      |      |   |   | 2 | PLWFC[339]SGM[147]GTQWRGMGLSLM[147]R                 | 1 |
|                                                                                                                                                                                                                                                                              |      |      |      |      |   |   | 3 | M[147]EEVVIAGMSGK                                    | 1 |
| FBLN2_HUMAN (P98095) Fibulin-2 precursor [MASS=126543]                                                                                                                                                                                                                       | 0.00 | 4.05 | 9.90 | 0.00 | 1 | 2 | 2 | SEFSQVASNTIPLPLPQNTC[339]K                           | 1 |
|                                                                                                                                                                                                                                                                              |      |      |      |      |   |   | 3 | C[330]SC[330]ASGFLLAADGKRC[339]EDVNEC[339]EAQR       | 1 |
|                                                                                                                                                                                                                                                                              |      |      |      |      |   |   | 3 | LC[330]PHGRGFM[147]TNGADIDEC[330]KVIHDVC[330]R       | 1 |
|                                                                                                                                                                                                                                                                              |      |      |      |      |   |   | 3 | QIC[339]PYGSGIIVGPDDSAVDM[147]DEC[339]KEPDVC[339]K   | 1 |
| FBN1_HUMAN (P35555) Fibrillin-1 precursor [MASS=312312]                                                                                                                                                                                                                      | 0.00 | 4.81 | 0.39 | 0.00 | 1 | 6 | 2 | KLC[330]PHGRGFMTNGADIDEC[330]K                       | 1 |
|                                                                                                                                                                                                                                                                              |      |      |      |      |   |   | 2 | LETC[330]FLRYEDEEC[330]TLPIAGR                       | 1 |
|                                                                                                                                                                                                                                                                              |      |      |      |      |   |   | 2 | LC[330]PHGRGFMTNGADIDEC[330]K                        | 1 |
|                                                                                                                                                                                                                                                                              |      |      |      |      |   |   | 3 | C[330]RC[339]DSGFALDSEERNK[330]TDIDEC[330]R          | 1 |
|                                                                                                                                                                                                                                                                              |      |      |      |      |   |   | 3 | GM[147]MC[330]KNLIGTFM[147]C[339]IC[330]PPGM[147]ARR | 1 |
|                                                                                                                                                                                                                                                                              |      |      |      |      |   |   | 3 | C[339]C[330]C[339]SKMPGEGWGDPC[339]ELC[330]PK        | 1 |
| FBN2_HUMAN (P35556) Fibrillin-2 precursor [MASS=314347]                                                                                                                                                                                                                      | *    | 2.58 | *    | *    | * | 4 | 3 | C[339]DC[330]PPGLAVGMDGR                             | 1 |
|                                                                                                                                                                                                                                                                              |      |      |      |      |   |   | 3 | C[339]IAQPC[330]AC[339]VYGFTGPQC[339]ER              | 1 |
|                                                                                                                                                                                                                                                                              |      |      |      |      |   |   | 3 | GMMC[339]KNLIGTFM[147]C[330]IC[330]PPGMARR           | 1 |
| FBN3_HUMAN (Q75N90) Fibrillin-3 precursor [MASS=300370]                                                                                                                                                                                                                      | *    | 1.39 | *    | *    | * | 2 | 3 | C[339]EC[339]PAGFNYSILLAC[330]EDVDEC[330]GSR         | 1 |
|                                                                                                                                                                                                                                                                              |      |      |      |      |   |   | 3 | GYTGTVC[339]GQPIC[339]DR                             | 1 |
| FBX31_HUMAN (Q5UX0) F-box only protein 31 [MASS=60647]                                                                                                                                                                                                                       | 0.00 | 6.49 | 0.25 | 0.00 | 1 | 2 | 3 | KAATVEC[330]MYGHK                                    | 1 |
|                                                                                                                                                                                                                                                                              |      |      |      |      |   |   | 3 | PGLFKGTYGSHGLEIVM[147]LSFHGR                         | 1 |
| FBX39_HUMAN (Q8N4B4) F-box only protein 39 [MASS=52646]                                                                                                                                                                                                                      | 0.00 | 3.39 | 1.66 | 0.00 | 1 | 2 | 2 | ERQC[339]ALR                                         | 1 |
|                                                                                                                                                                                                                                                                              |      |      |      |      |   |   | 1 | YLEHLEVK                                             | 1 |
| FBX40_HUMAN (Q9UH90) F-box only protein 40 (Muscle disease-related protein) [MASS=79663]                                                                                                                                                                                     | 0.00 | 4.65 | 0.96 | 0.00 | 1 | 2 | 2 | VPVSYC[339]GK                                        | 1 |
|                                                                                                                                                                                                                                                                              |      |      |      |      |   |   | 3 | DYNMYLVHNGRM[147]LIHFQMPAC[330]TPK                   | 1 |

|                                                                                                                                                                                                                                           |      |      |      |      |   |   |                  |                                                                                                      |                  |
|-------------------------------------------------------------------------------------------------------------------------------------------------------------------------------------------------------------------------------------------|------|------|------|------|---|---|------------------|------------------------------------------------------------------------------------------------------|------------------|
| FBXL4_HUMAN (Q9UKA2) F-box/LRR-repeat protein 4 (F-box and leucine-rich repeat protein 4) (F-box protein FBL4/FBL5) [MASS=70096]                                                                                                          | *    | 2.58 | *    | *    | * | 1 | 2                | SVC[330]DTDIDELAC[330]NC[339]TR                                                                      | 1                |
| FGD1_HUMAN (P98174) FYVE, RhoGEF and PH domain-containing protein 1 (Faciogenital dysplasia 1 protein) (Zinc finger FYVE domain-containing protein 3) (Rho/Rac guanine nucleotide exchange factor FGD1) (Rho/Rac GEF) [MASS=106560]       | *    | 2.08 | *    | *    | * | 1 | 2                | ARIDVDGMELKESNLNLPR                                                                                  | 1                |
| FGF6_HUMAN (P10767) Fibroblast growth factor 6 precursor (FGF-6) (HBGF-6) (HST-2) [MASS=22904]                                                                                                                                            | *    | 7.69 | *    | *    | * | 1 | 2                | GSKVSPIMTVTHFLPR                                                                                     | 1                |
| FHL1_HUMAN (Q13642) Four and a half LIM domains protein 1 (FHL-1) (Skeletal muscle LIM-protein 1) (SLIM 1) (SLIM) [MASS=36132]                                                                                                            | 0.93 | 4.04 | 0.78 | 0.00 | 1 | 1 | 2                | GEDFYC[330]VTC[330]HETK                                                                              | 1                |
| FILA_HUMAN (P20930) Filaggrin [MASS=435166]                                                                                                                                                                                               | *    | 0.91 | *    | *    | * | 2 | 2<br>3           | HHEAASWADSSR<br>DHPRYYATYINKDPGLC[330]GHSSDISK                                                       | 1<br>1           |
| FKBP2_HUMAN (P26885) FK506-binding protein 2 precursor (EC 5.2.1.8) (Peptidyl-prolyl cis-trans isomerase) (PPlase) (Rotamase) (13 kDa FKBP) (FKBP-13) [MASS=15649]                                                                        | 0.71 | 5.63 | 0.93 | 0.00 | 1 | 1 | 2                | RVDHC[330]PIK                                                                                        | 1                |
| FLNA_HUMAN (P21333) Filamin-A (Alpha-filamin) (Filamin-1) (Endothelial actin-binding protein) (Actin-binding protein 280) (ABP-280) (Nonmuscle filamin) [MASS=280628]                                                                     | *    | 3.33 | *    | *    | * | 4 | 3<br>3<br>2<br>2 | AGGPGLERAEAGVPAEFSIWWTREAGAGGLAIVEGPSK<br>VTGPRLVSNHSLHETSSVFVDSLTK<br>FNGTHIPGSPFK<br>AWGPGLEGGVVGK | 1<br>1<br>1<br>1 |
| FLNB_HUMAN (O75369) Filamin-B (FLN-B) (Beta-filamin) (Actin-binding-like protein) (Thyroid autoantigen) (Truncated actin-binding protein) (Truncated ABP) (ABP-280 homolog) (ABP-278) (Filamin 3) (Filamin homolog 1) (Fh1) [MASS=278193] | 0.00 | 1.15 | 0.69 | 0.00 | 1 | 2 | 2<br>2           | HVGNQQYNVTYVVK<br>SGC[339]IVNNLAEFTVDPK                                                              | 1<br>1           |
| FLOT1_HUMAN (O75955) Flotillin-1 [MASS=47355]                                                                                                                                                                                             | 0.22 | 6.32 | 0.35 | 0.00 | 1 | 2 | 2<br>2           | MRGEAEFAIGARAR<br>VFVLP[330]IQQIQR                                                                   | 1<br>1           |
| FMNL_HUMAN (O95466) Formin-like 1 protein (Formin-like protein) (Leukocyte formin) (CLL-associated antigen KW-13) [MASS=121827]                                                                                                           | *    | 0.73 | *    | *    | * | 1 | 2                | RGAAYGFR                                                                                             | 1                |



|                                                                                                                                                                                                                           |      |      |      |      |   |   |   |                                            |   |
|---------------------------------------------------------------------------------------------------------------------------------------------------------------------------------------------------------------------------|------|------|------|------|---|---|---|--------------------------------------------|---|
| FOG1_HUMAN (Q8IX07) Zinc finger protein ZFPM1 (Zinc finger protein multitype 1) (Friend of GATA protein 1) (Friend of GATA-1) (FOG-1) [MASS=104546]                                                                       | 0.00 | 7.47 | 0.59 | 0.00 | 1 | 3 | 3 | GATC[339]FEC[339]EITFSNVNYYVHK             | 1 |
|                                                                                                                                                                                                                           |      |      |      |      |   |   | 3 | VEAVEEPEAAPILGPGEPPQAPSR                   | 1 |
|                                                                                                                                                                                                                           |      |      |      |      |   |   | 3 | NLQAHLLYYC[330]ASRQGTGSPAAATDEKPK          | 1 |
| FOXL1_HUMAN (Q12952) Forkhead box protein L1 (Forkhead-related protein FKHL11) (Forkhead-related transcription factor 7) (FREAC-7) [MASS=36490]                                                                           | *    | 3.77 | *    | *    | * | 1 | 3 | C[339]LDM[147]FENGNYRRR                    | 1 |
| FRAP_HUMAN (P42345) FKBP12-rapamycin complex-associated protein (FK506-binding protein 12-rapamycin complex-associated protein 1) (Rapamycin target protein) (RAPT1) (Mammalian target of rapamycin) (mTOR) [MASS=288890] | 0.00 | 5.22 | 1.13 | 0.00 | 1 | 5 | 3 | QLDHPLPTVHPQVYAYMKNMWKSAR                  | 1 |
|                                                                                                                                                                                                                           |      |      |      |      |   |   | 3 | NM[147]C[339]EHSNTLVQQAM[147]M[147]VSEELIR | 1 |
|                                                                                                                                                                                                                           |      |      |      |      |   |   | 2 | TGTTVPESIHSFIGDGLVKPEALNK                  | 1 |
|                                                                                                                                                                                                                           |      |      |      |      |   |   | 3 | M[147]LGTGPAAATTAATTSSNVSVLQQFASGLK        | 1 |
|                                                                                                                                                                                                                           |      |      |      |      |   |   | 3 | TLLMYTVPVAVQGFFRSISLSRGNLQDTLR             | 1 |
| FRDA_HUMAN (Q16595) Frataxin, mitochondrial precursor (Friedreich ataxia protein) (Fxn) [Contains: Frataxin intermediate form] [MASS=23135]                                                                               | 0.00 | 6.67 | 1.24 | 0.00 | 1 | 1 | 3 | RGLRTDIDATC[330]TPR                        | 1 |
| FREM1_HUMAN (Q5H8C1) FRAS1-related extracellular matrix protein 1 precursor (Protein QBRICK) [MASS=244122]                                                                                                                | 0.00 | 1.28 | 0.60 | 0.00 | 1 | 2 | 3 | QHM[147]RWLWDIGGRK                         | 1 |
|                                                                                                                                                                                                                           |      |      |      |      |   |   | 2 | YVHNGC[330]PILDEDTVK                       | 1 |
| FRM4A_HUMAN (Q9P2Q2) FERM domain-containing protein 4A [MASS=113964]                                                                                                                                                      | 0.00 | 8.30 | 0.92 | 0.00 | 1 | 4 | 2 | LPALPTQALKEHPSLAYC[339]EDR                 | 1 |
|                                                                                                                                                                                                                           |      |      |      |      |   |   | 2 | TFGHSGIAVHTWYAC[339]PALIK                  | 1 |
|                                                                                                                                                                                                                           |      |      |      |      |   |   | 3 | DM[147]LAALKSRQEALEETLR                    | 1 |
|                                                                                                                                                                                                                           |      |      |      |      |   |   | 3 | SSSLESQGKLLGSENDTGSPDFYTPR                 | 1 |
| FSCN1_HUMAN (Q16658) Fascin (Singed-like protein) (55 kDa actin-bundling protein) (p55) [MASS=54398]                                                                                                                      | *    | 8.94 | *    | *    | * | 2 | 3 | QGM[147]DLSANQDEETDQETFQLEIDR              | 1 |
|                                                                                                                                                                                                                           |      |      |      |      |   |   | 3 | NGQLAASVETAGDSEFLM[147]K                   | 1 |
| FSTL5_HUMAN (Q8N475) Follistatin-related protein 5 precursor (Follistatin-like 5) [MASS=95750]                                                                                                                            | 0.00 | 2.01 | *    | *    | * | 1 | 3 | QLTLQANGSEVHISNVR                          | 1 |
| FTHFD_HUMAN (O75891) 10-formyltetrahydrofolate dehydrogenase (EC 1.5.1.6) (10-FTHFDH) (Aldehyde dehydrogenase 1 family member L1) [MASS=98829]                                                                            | 0.00 | 9.53 | 5.16 | 0.00 | 1 | 4 | 2 | FLFPEGIKGM[147]VQAVRLIAEGK                 | 1 |
|                                                                                                                                                                                                                           |      |      |      |      |   |   | 3 | EPVGVC[339]GIIPWNYPLM[147]MLSWK            | 1 |
|                                                                                                                                                                                                                           |      |      |      |      |   |   | 3 | KVSLELGGKSPLIIFADC[330]DLNK                | 1 |
|                                                                                                                                                                                                                           |      |      |      |      |   |   | 3 | PGFFFPEPTVFTDVEDHM[147]FIAK                | 1 |

|                                                                                                                                                                                                                                                                             |      |       |      |      |   |   |                  |                                                                                                                                     |                  |
|-----------------------------------------------------------------------------------------------------------------------------------------------------------------------------------------------------------------------------------------------------------------------------|------|-------|------|------|---|---|------------------|-------------------------------------------------------------------------------------------------------------------------------------|------------------|
| FVT1_HUMAN (Q06136) 3-ketodihydrospingosine reductase precursor (EC 1.1.1.102) (3-dehydrospinganine reductase) (KDS reductase) (Follicular variant translocation protein 1) (FVT-1) [MASS=36187]                                                                            | *    | 6.33  | *    | *    | * | 1 | 2                | LM[147]SINYLGSVYPSRAVITM[147]K                                                                                                      | 1                |
| FZD4_HUMAN (Q9ULV1) Frizzled-4 precursor (Fz-4) (hFz4) (FzE4) [MASS=59881]                                                                                                                                                                                                  | 0.00 | 5.77  | 0.05 | 0.00 | 1 | 1 | 3                | EFTDIWM[147]AVWASLC[330]FISTAFTVLTFLIDSSR                                                                                           | 1                |
| G3P_HUMAN (P04406) Glyceraldehyde-3-phosphate dehydrogenase (EC 1.2.1.12) (GAPDH) [MASS=35922]                                                                                                                                                                              | 1.00 | 9.28  | 0.83 | 0.07 | 2 | 2 | 2<br>1           | IISNASC[330]TTNC[330]LAPLAK<br>VPTANVSVVDTLC[330]R                                                                                  | 1<br>1           |
| G6PI_HUMAN (P06744) Glucose-6-phosphate isomerase (EC 5.3.1.9) (GPI) (Phosphoglucose isomerase) (PGI) (Phosphohexose isomerase) (PHI) (Neuroleukin) (NLK) (Sperm antigen 36) (SA-36) [MASS=63015]                                                                           | 1.00 | 12.75 | 0.87 | 0.26 | 2 | 3 | 2<br>3<br>2<br>3 | MIPC[339]DFLIPVQTQHPIR<br>IFVQGIWDINSFDQWGVELGK<br>MIPC[330]DFLIPVQTQHPIR<br>IEPELDGSAQVTSHDASTNGLINFIKQREAR                        | 1<br>1<br>1<br>1 |
| GA2L2_HUMAN (Q8NHY3) GAS2-like protein 2 (Growth arrest-specific 2-like 2) (GAS2-related protein on chromosome 17) (GAR17 protein) [MASS=96519]                                                                                                                             | 0.00 | 3.86  | 1.27 | 0.00 | 1 | 2 | 3<br>2           | C[330]TSLSHKPGSFLKPPAPPVQHEVR<br>SPTPVQGLTK                                                                                         | 1<br>1           |
| GABR1_HUMAN (Q9UBS5) Gamma-aminobutyric acid type B receptor, subunit 1 precursor (GABA-B receptor 1) (GABA-B-R1) (Gb1) [MASS=108320]                                                                                                                                       | *    | 1.87  | *    | *    | * | 1 | 2                | TDKWIGGSPPADQTLVIK                                                                                                                  | 1                |
| GABT_HUMAN (P80404) 4-aminobutyrate aminotransferase, mitochondrial precursor (EC 2.6.1.19) ((S)-3-amino-2-methylpropionate transaminase) (EC 2.6.1.22) (Gamma-amino-N-butyrate transaminase) (GABA transaminase) (GABA aminotransferase) (GABA-AT) (GABA-T) ( [MASS=56439] | 1.00 | 11.40 | 1.25 | 0.22 | 3 | 3 | 2<br>3<br>2<br>2 | TM[147]GC[330]LATTHSK<br>GM[147]SQLITM[147]AC[330]GSC[330]SNENALKTIFMWYR<br>TM[147]GC[339]LATTHSK<br>HGC[339]AFLVDEVQTTGGGC[339]TGK | 1<br>1<br>1<br>1 |

|                                                                                                                                                        |      |       |      |      |    |   |  |   |                                                |   |
|--------------------------------------------------------------------------------------------------------------------------------------------------------|------|-------|------|------|----|---|--|---|------------------------------------------------|---|
|                                                                                                                                                        |      |       |      |      |    |   |  | 2 | LFVSGAC[330]DASAK                              | 2 |
|                                                                                                                                                        |      |       |      |      |    |   |  | 3 | QTFTGHESDINAIC[330]FFPNGNAFATGSDDATC[330]R     | 1 |
|                                                                                                                                                        |      |       |      |      |    |   |  | 3 | ADQELM[147]TYSHDNIIC[330]GITSVSFSK             | 1 |
|                                                                                                                                                        |      |       |      |      |    |   |  | 3 | QTFTGHESDINAIC[339]FFPNGNAFATGSDDATC[330]R     | 1 |
|                                                                                                                                                        |      |       |      |      |    |   |  | 2 | AC[330]ADATLSQITNNIDPVGR                       | 1 |
|                                                                                                                                                        |      |       |      |      |    |   |  | 3 | ELAGHTGYLSC[330]C[330]R                        | 1 |
|                                                                                                                                                        |      |       |      |      |    |   |  | 3 | QTFTGHESDINAIC[339]FFPNGNAFATGSDDATC[339]R     | 1 |
|                                                                                                                                                        |      |       |      |      |    |   |  | 2 | KAC[330]ADATLSQITNNIDPVGR                      | 1 |
|                                                                                                                                                        |      |       |      |      |    |   |  | 2 | KAC[339]ADATLSQITNNIDPVGR                      | 1 |
|                                                                                                                                                        |      |       |      |      |    |   |  | 2 | ELAGHTGYLSC[339]C[339]R                        | 1 |
|                                                                                                                                                        |      |       |      |      |    |   |  | 2 | ELAGHTGYLSC[330]C[330]R                        | 3 |
| GBB1_HUMAN (P62873) Guanine nucleotide-binding protein G(I)/G(S)/G(T) subunit beta 1 (Transducin beta chain 1) [MASS=37246]                            | 1.00 | 35.40 | 0.55 | 0.15 | 13 | 6 |  |   |                                                |   |
|                                                                                                                                                        |      |       |      |      |    |   |  | 3 | TFVSGAC[330]DASIK                              | 1 |
|                                                                                                                                                        |      |       |      |      |    |   |  | 3 | ELPGHTGYLSC[330]C[330]R                        | 1 |
|                                                                                                                                                        |      |       |      |      |    |   |  | 2 | ELPGHTGYLSC[330]C[330]R                        | 3 |
| GBB2_HUMAN (P62879) Guanine nucleotide-binding protein G(I)/G(S)/G(T) subunit beta 2 (Transducin beta chain 2) (G protein beta 2 subunit) [MASS=37200] | 0.99 | 7.37  | 0.55 | 0.05 | 3  | 2 |  |   |                                                |   |
|                                                                                                                                                        |      |       |      |      |    |   |  | 2 | ELSAHTGYLSC[339]C[339]R                        | 1 |
| GBB3_HUMAN (P16520) Guanine nucleotide-binding protein G(I)/G(S)/G(T) subunit beta 3 (Transducin beta chain 3) [MASS=37221]                            | 0.73 | 3.82  | 1.42 | 0.00 | 1  | 1 |  |   |                                                |   |
|                                                                                                                                                        |      |       |      |      |    |   |  | 2 | ASADLM[147]SYC[330]EEHAR                       | 1 |
|                                                                                                                                                        |      |       |      |      |    |   |  | 3 | ASADLM[147]SYC[330]EEHARSDPLLIPTSENPFKDK       | 1 |
| GBG12_HUMAN (Q9UBI6) Guanine nucleotide-binding protein G(I)/G(S)/G(O) gamma-12 subunit precursor [MASS=7875]                                          | 0.99 | 64.79 | 0.73 | 0.00 | 1  | 2 |  |   |                                                |   |
|                                                                                                                                                        |      |       |      |      |    |   |  | 3 | AAADLM[147]AYC[339]EAHAKEDPLLTVPASENPFRR       | 1 |
|                                                                                                                                                        |      |       |      |      |    |   |  | 2 | AAADLM[147]AYC[339]EAHAK                       | 1 |
| GBG2_HUMAN (P59768) Guanine nucleotide-binding protein G(I)/G(S)/G(O) gamma-2 subunit precursor (G gamma-1) [MASS=7719]                                | 1.00 | 62.86 | 0.48 | 0.11 | 2  | 2 |  |   |                                                |   |
|                                                                                                                                                        |      |       |      |      |    |   |  | 2 | GETPVNSTM[147]SIGQARKMVEQLK                    | 1 |
|                                                                                                                                                        |      |       |      |      |    |   |  | 3 | AAADLM[147]TYC[330]DAHAC[330]EDPLITPVPTSENPFRR | 1 |
| GBG3_HUMAN (P63215) Guanine nucleotide-binding protein G(I)/G(S)/G(O) gamma-3 subunit precursor [MASS=8305]                                            | 0.80 | 69.33 | 0.57 | 0.00 | 1  | 2 |  |   |                                                |   |
|                                                                                                                                                        |      |       |      |      |    |   |  | 2 | AASDLM[147]SYC[330]EQHAR                       | 1 |
| GBG7_HUMAN (O60262) Guanine nucleotide-binding protein G(I)/G(S)/G(O) gamma-7 subunit precursor [MASS=7522]                                            | 0.98 | 20.59 | 0.38 | 0.00 | 1  | 1 |  |   |                                                |   |
|                                                                                                                                                        |      |       |      |      |    |   |  | 2 | RPNLETTYERVVK                                  | 1 |
|                                                                                                                                                        |      |       |      |      |    |   |  | 3 | NEETPEEGQQPWLC[330]GESFTLADVSLAVTLHR           | 1 |
| GDAP1_HUMAN (Q8TB36) Ganglioside-induced differentiation-associated protein 1 (GDAP1) [MASS=41251]                                                     | 0.00 | 12.29 | 1.14 | 0.00 | 1  | 2 |  |   |                                                |   |

|                                                                                                                                                                          |      |       |      |      |   |   |   |                                   |   |
|--------------------------------------------------------------------------------------------------------------------------------------------------------------------------|------|-------|------|------|---|---|---|-----------------------------------|---|
| G DIA_HUMAN (P31150) Rab GDP dissociation inhibitor alpha (Rab GDI alpha) (Guanosine diphosphate dissociation inhibitor 1) (GDI-1) (XAP-4) (Oligophrenin-2) [MASS=50582] | *    | 2.01  | *    | *    | * | 1 | 2 | VRKAGQVIR                         | 1 |
| G DIB_HUMAN (P50395) Rab GDP dissociation inhibitor beta (Rab GDI beta) (Guanosine diphosphate dissociation inhibitor 2) (GDI-2) [MASS=50663]                            | *    | 1.57  | *    | *    | * | 1 | 1 | SEGEIAR                           | 1 |
| G DS1_HUMAN (P52306) Rap1 GTPase-GDP dissociation stimulator 1 (SMG P21 stimulatory GDP/GTP exchange protein) (SMG GDS protein) (Exchange factor smgGDS) [MASS=66403]    | 0.99 | 3.46  | 0.78 | 0.00 | 1 | 1 | 3 | IQASGILQLFASLLTPQSSC[339]JK       | 1 |
| G FRA3_HUMAN (O60609) GDNF family receptor alpha-3 precursor (GFR-alpha-3) [MASS=44511]                                                                                  | 0.00 | 6.75  | 0.64 | 0.00 | 1 | 2 | 2 | M[147]NLSKLN[M147]LKPDSLDC[339]LK | 1 |
|                                                                                                                                                                          |      |       |      |      |   |   | 2 | LMNSC[330]LQAR                    | 1 |
| G HC1_HUMAN (Q9H936) Mitochondrial glutamate carrier 1 (GC-1) (Glutamate/H+) symporter 1) (Solute carrier family 25 member 22) [MASS=34470]                              | 1.00 | 11.46 | 1.23 | 0.04 | 5 | 2 | 2 | LINGGIAGLIGVTC[339]VFPIDLAK       | 1 |
|                                                                                                                                                                          |      |       |      |      |   |   | 2 | GVNEDTYSGLDLC[339]JAR             | 1 |
|                                                                                                                                                                          |      |       |      |      |   |   | 2 | LINGGIAGLIGVTC[330]VFPIDLAK       | 3 |
| G LIS3_HUMAN (Q8NEA6) Zinc finger protein GLIS3 (GLI-similar 3) (Zinc finger protein 515) [MASS=83605]                                                                   | 0.39 | 1.94  | 1.02 | 0.00 | 1 | 1 | 2 | GSC[330]IPQPRPVPGSQK              | 1 |
| G LRA2_HUMAN (P23416) Glycine receptor alpha-2 chain precursor [MASS=52002]                                                                                              | 0.00 | 4.65  | *    | *    | * | 1 | 2 | SGKQPSQTLSPSDFLDKLM[147]GR        | 1 |
| G LRX5_HUMAN (Q86SX6) Glutaredoxin-related protein 5 [MASS=16628]                                                                                                        | 0.99 | 12.10 | 1.78 | 0.00 | 1 | 1 | 2 | GTPEQPQC[339]GFSNAVQILR           | 1 |
|                                                                                                                                                                          |      |       |      |      |   |   | 2 | C[339]VQSNIVLLTQAFR               | 2 |
| G LSK_HUMAN (O94925) Glutaminase kidney isoform, mitochondrial precursor (EC 3.5.1.2) (GLS) (L-glutamine amidohydrolase) (K-glutaminase) [MASS=73461]                    | 1.00 | 5.38  | 1.12 | 0.13 | 7 | 3 | 2 | LKEC[330]M[147]DM[147]LR          | 1 |
|                                                                                                                                                                          |      |       |      |      |   |   | 2 | LKEC[339]M[147]DM[147]LR          | 1 |
|                                                                                                                                                                          |      |       |      |      |   |   | 2 | C[330]VQSNIVLLTQAFR               | 2 |
|                                                                                                                                                                          |      |       |      |      |   |   | 2 | VPFC[339]LQSC[339]VKPLK           | 1 |
| G LSL_HUMAN (Q9UI32) Glutaminase liver isoform, mitochondrial precursor (EC 3.5.1.2) (GLS) (L-glutamine amidohydrolase) (L-glutaminase) [MASS=66309]                     | 0.46 | 1.16  | 3.17 | 0.00 | 1 | 1 | 2 | FLIEAC[339]JK                     | 1 |

|                                                                                                                                                                                                                                                                              |      |       |      |      |   |   |   |                                            |   |
|------------------------------------------------------------------------------------------------------------------------------------------------------------------------------------------------------------------------------------------------------------------------------|------|-------|------|------|---|---|---|--------------------------------------------|---|
| GLT14_HUMAN (Q96FL9) Polypeptide N-acetylgalactosaminyltransferase 14 (EC 2.4.1.41) (Protein-UDP acetylgalactosaminyltransferase 14) (UDP-GalNAc:polypeptide N-acetylgalactosaminyltransferase 14) (Polypeptide GalNAc transferase 14) (GalNAc-T14) (pp-GaNTas [MASS=64320]) | 0.00 | 9.96  | *    | *    | * | 3 | 3 | RLDPTEPIRTPIIAGGLFVIDK                     | 1 |
|                                                                                                                                                                                                                                                                              |      |       |      |      |   |   | 3 | VVMC[330]GGSLEIVPC[330]SRVGHVFR            | 1 |
|                                                                                                                                                                                                                                                                              |      |       |      |      |   |   | 2 | PFGNVESRLDLR                               | 1 |
| GNAI1_HUMAN (P63096) Guanine nucleotide-binding protein G(i), alpha-1 subunit (Adenylate cyclase-inhibiting G alpha protein) [MASS=40230]                                                                                                                                    | 0.00 | 3.68  | *    | *    | * | 1 | 2 | EIYTHFTC[330]ATDTK                         | 1 |
| GNAI2_HUMAN (P04899) Guanine nucleotide-binding protein G(i), alpha-2 subunit (Adenylate cyclase-inhibiting G alpha protein) [MASS=40319]                                                                                                                                    | 1.00 | 16.67 | 0.76 | 0.05 | 2 | 3 | 2 | IIHEDGYSEEEC[330]R                         | 1 |
|                                                                                                                                                                                                                                                                              |      |       |      |      |   |   | 3 | AVVYSNTIQSIMAIVKAM[147]GNLQIDFADPSR        | 1 |
|                                                                                                                                                                                                                                                                              |      |       |      |      |   |   | 2 | QM[147]KIIHEDGYSEEEC[339]R                 | 1 |
| GNAI3_HUMAN (P08754) Guanine nucleotide-binding protein G(k) subunit alpha (G(i) alpha-3) [MASS=40401]                                                                                                                                                                       | 0.00 | 10.20 | *    | *    | * | 2 | 2 | AAKEVKLLLLGAGESGK                          | 1 |
|                                                                                                                                                                                                                                                                              |      |       |      |      |   |   | 3 | QMKIIHEDGYSEDEC[339]KQYK                   | 1 |
| GNAL_HUMAN (P38405) Guanine nucleotide-binding protein G(olf) subunit alpha (Adenylate cyclase-stimulating G alpha protein, olfactory type) [MASS=44308]                                                                                                                     | *    | 5.25  | *    | *    | * | 1 | 3 | WLRTISIILFLNKQDMLAEK                       | 1 |
|                                                                                                                                                                                                                                                                              |      |       |      |      |   |   | 2 | M[147]HESLMLFDSIC[330]NNK                  | 1 |
|                                                                                                                                                                                                                                                                              |      |       |      |      |   |   | 2 | M[147]EDTEPFSAELLSAMMR                     | 1 |
| GNAO1_HUMAN (P09471) Guanine nucleotide-binding protein G(o) subunit alpha 1 [MASS=39919]                                                                                                                                                                                    | 1.00 | 20.40 | 1.06 | 0.00 | 1 | 4 | 2 | M[147]VC[330]DVVSR                         | 3 |
|                                                                                                                                                                                                                                                                              |      |       |      |      |   |   | 3 | MEDTEPFSAELLSAM[147]MRLWGDSGIQEC[330]FNRSR | 1 |
|                                                                                                                                                                                                                                                                              |      |       |      |      |   |   | 2 | MVC[330]DVVSR                              | 2 |
| GNAO2_HUMAN (P29777) Guanine nucleotide-binding protein G(o) subunit alpha 2 [MASS=39955]                                                                                                                                                                                    | 1.00 | 8.50  | 0.85 | 0.00 | 1 | 1 | 2 | M[147]VC[339]DVVSR                         | 1 |
|                                                                                                                                                                                                                                                                              |      |       |      |      |   |   | 3 | SPLTIC[339]FPEYTGPSAFTEAVAYIQAQYESK        | 1 |
| GNAZ_HUMAN (P19086) Guanine nucleotide-binding protein G(z) subunit alpha (G(x) alpha chain) (Gz-alpha) [MASS=40792]                                                                                                                                                         | 0.00 | 3.11  | 2.33 | 0.00 | 1 | 1 | 3 | SPLTIC[330]FPEYTGPSAFTEAVAYIQAQYESK        | 1 |
|                                                                                                                                                                                                                                                                              |      |       |      |      |   |   | 2 | IPLTIC[339]FPEYK                           | 1 |

|                                                                                                                                                                                                                    |      |       |      |      |   |   |   |                                            |   |
|--------------------------------------------------------------------------------------------------------------------------------------------------------------------------------------------------------------------|------|-------|------|------|---|---|---|--------------------------------------------|---|
| GNB1L_HUMAN (Q9BYB4) Guanine nucleotide-binding protein subunit beta-like protein 1 (G protein subunit beta-like protein 1) (WD40 repeat-containing protein deleted in VCFS) (Protein WDVCF) (DGCRK3) [MASS=35618] | 0.00 | 5.81  | 6.13 | 0.00 | 1 | 1 | 2 | IAC[339]HEEPVM[147]DLDFDSQKAR              | 1 |
|                                                                                                                                                                                                                    |      |       |      |      |   |   | 2 | AMASLQNERDHLWNELEKFR                       | 1 |
|                                                                                                                                                                                                                    |      |       |      |      |   |   | 2 | LHEDELLQLVTQADVETEMQQKLRVLQR               | 1 |
| GGOB1_HUMAN (Q14789) Golgin subfamily B member 1 (Giantin) (MacroGolgin) (372 kDa Golgi complex-associated protein) (GCP372) [MASS=376075]                                                                         | *    | 4.20  | *    | *    | * | 7 | 2 | KLQAALINR                                  | 1 |
|                                                                                                                                                                                                                    |      |       |      |      |   |   | 3 | LDYESQTAHDNLLTEQIHLSIEAKSKDVK              | 1 |
|                                                                                                                                                                                                                    |      |       |      |      |   |   | 2 | SLQEELSLARGTIERLTK                         | 1 |
|                                                                                                                                                                                                                    |      |       |      |      |   |   | 3 | ALHTQLEMQAKEHDER                           | 1 |
|                                                                                                                                                                                                                    |      |       |      |      |   |   | 3 | VLQRKLEEHEESLVGR                           | 1 |
| GP115_HUMAN (Q8IZF3) Probable G-protein coupled receptor 115 (G-protein coupled receptor PGR18) [MASS=83830]                                                                                                       | *    | 6.91  | *    | *    | * | 3 | 3 | PSIGSSKSQDVVIMR                            | 1 |
|                                                                                                                                                                                                                    |      |       |      |      |   |   | 2 | WDEKAC[330]QM[147]M[147]LDIR               | 1 |
|                                                                                                                                                                                                                    |      |       |      |      |   |   | 2 | SLNFSM[147]SM[147]NNTTEDILGM[147]VQIPR     | 1 |
| GP132_HUMAN (Q9UNW8) Probable G-protein coupled receptor 132 (G2 accumulation protein) [MASS=42499]                                                                                                                | 0.00 | 6.58  | 1.08 | 0.00 | 1 | 2 | 2 | IFRSIKQSMGLSAAQK                           | 1 |
|                                                                                                                                                                                                                    |      |       |      |      |   |   | 2 | WTLGLLAC[330]K                             | 1 |
| GP144_HUMAN (Q7Z7M1) Probable G-protein coupled receptor 144 (G-protein coupled receptor PGR24) [MASS=104087]                                                                                                      | *    | 0.93  | *    | *    | * | 1 | 2 | WLHGAAVDR                                  | 1 |
| GP150_HUMAN (Q8NGU9) Probable G-protein coupled receptor 150 [MASS=46353]                                                                                                                                          | *    | 5.30  | *    | *    | * | 1 | 2 | VRLVFLGVILVVAVAGNTTVLC[330]R               | 1 |
| GP158_HUMAN (Q5T848) Probable G-protein coupled receptor 158 precursor [MASS=135488]                                                                                                                               | 0.00 | 3.46  | 1.28 | 0.00 | 1 | 2 | 2 | DPAPQNSNPAEEPR                             | 1 |
|                                                                                                                                                                                                                    |      |       |      |      |   |   | 3 | YLRLAHSFQALC[339]M[147]LLDFVSMLVYHFR       | 1 |
| GP162_HUMAN (Q16538) Probable G-protein coupled receptor 162 (Gene-rich cluster gene A protein) [MASS=63930]                                                                                                       | 0.00 | 15.99 | 0.36 | 0.00 | 1 | 4 | 3 | HRLEDEEEDDEEAEAGGLASLRQFLESGVLGSGGGPPR     | 1 |
|                                                                                                                                                                                                                    |      |       |      |      |   |   | 2 | GGAGAEASLR                                 | 1 |
|                                                                                                                                                                                                                    |      |       |      |      |   |   | 2 | AWGGSWGPGNPIFPQLTL                         | 1 |
|                                                                                                                                                                                                                    |      |       |      |      |   |   | 3 | TVWEQC[330]VAIM[147]SEEDGDDGGC[330]DDYAEGR | 1 |
| GPC4_HUMAN (O75487) Glypican-4 precursor (K-glypican) [MASS=62412]                                                                                                                                                 | *    | 3.60  | *    | *    | * | 1 | 3 | PGAQAYLLTVFC[330]JLFLVM[147]QR             | 1 |
| GPM6A_HUMAN (P51674) Neuronal membrane glycoprotein M6-a (M6a) [MASS=31209]                                                                                                                                        | 1.00 | 11.87 | 0.56 | 0.08 | 3 | 3 | 2 | KIC[339]TVSENFLR                           | 1 |
|                                                                                                                                                                                                                    |      |       |      |      |   |   | 2 | KIC[330]TVSENFLR                           | 1 |
|                                                                                                                                                                                                                    |      |       |      |      |   |   | 2 | QFGIVTIGEEKK                               | 1 |
|                                                                                                                                                                                                                    |      |       |      |      |   |   | 2 | IC[330]TVSENFLR                            | 1 |
| GPM6B_HUMAN (Q13491) Neuronal membrane glycoprotein M6-b (M6b) [MASS=28989]                                                                                                                                        | 0.23 | 3.40  | 0.51 | 0.00 | 1 | 1 | 2 | SREDC[330]C[330]TKF                        | 1 |

|                                                                                                                                                                                         |      |       |      |      |   |   |   |                                            |                                                                                                 |             |
|-----------------------------------------------------------------------------------------------------------------------------------------------------------------------------------------|------|-------|------|------|---|---|---|--------------------------------------------|-------------------------------------------------------------------------------------------------|-------------|
| GPNMB_HUMAN (Q14956) Transmembrane glycoprotein NMB precursor (Transmembrane glycoprotein HGFIN) [MASS=63922]                                                                           | *    | 12.59 | *    | *    | * | 3 | 3 | 3                                          | TFNGSGTYC[330]VNLTLGDDTSLALTSTLISVPDR<br>C[339]QKEDANGNIVYEK<br>MANSALISVGC[330]LAIFVTVISLLVYKK | 1<br>1<br>1 |
| GPR15_HUMAN (P49685) G-protein coupled receptor 15 (BOB) [MASS=40787]                                                                                                                   | 0.00 | 7.50  | 0.62 | 0.00 | 1 | 1 | 3 | RTDC[330]AYVVC[330]ASIWFISC[330]LLGLPTLLSR | 1                                                                                               |             |
| GPR97_HUMAN (Q86Y34) Probable G-protein coupled receptor 97 precursor (G-protein coupled receptor PGR26) [MASS=60860]                                                                   | *    | 4.37  | *    | *    | * | 1 | 3 | ISQAGC[339]GVSM[147]IFLAFTIILYAFLR         | 1                                                                                               |             |
| GPVI_HUMAN (Q9HCN6) Platelet glycoprotein VI precursor [MASS=36923]                                                                                                                     | 0.00 | 7.08  | 1.50 | 0.04 | 2 | 2 | 3 | QDVHSRGLC[339]S<br>C[339]QGPPGVDLYRLEK     | 1<br>3                                                                                          |             |
| GRAA_HUMAN (P12544) Granzyme A precursor (EC 3.4.21.78) (Cytotoxic T-lymphocyte proteinase 1) (Hanukkah factor) (H factor) (HF) (Granzyme-1) (CTL tryptase) (Fragmentin-1) [MASS=28969] | 0.00 | 6.87  | 2.00 | 0.00 | 1 | 1 | 2 | KGDDVKPGTM[147]C[339]QVAGWGR               | 1                                                                                               |             |
| GRHL3_HUMAN (Q8TE85) Grainyhead-like protein 3 homolog (Sister of mammalian grainyhead) (Transcription factor CP2-like 4) [MASS=70318]                                                  | *    | 4.31  | *    | *    | * | 1 | 3 | HPPPDC[339]LEC[339]SHPVTQVRNM[147]GFGDGFWR | 1                                                                                               |             |
| GRIA1_HUMAN (P42261) Glutamate receptor 1 precursor (GluR-1) (GluR-A) (GluR-K1) (Glutamate receptor ionotropic, AMPA 1) (AMPA-selective glutamate receptor 1) [MASS=101535]             | 0.23 | 1.32  | *    | *    | * | 2 | 1 | HDSIR                                      | 1                                                                                               |             |
| GRIA4_HUMAN (P48058) Glutamate receptor 4 precursor (GluR-4) (GluR4) (GluR-D) (Glutamate receptor ionotropic, AMPA 4) (AMPA-selective glutamate receptor 4) [MASS=100809]               | 0.23 | 1.22  | 1.07 | 0.00 | 1 | 1 | 2 | KNHEM[147]FEGNDK                           | 1                                                                                               |             |
| GRIK3_HUMAN (Q13003) Glutamate receptor, ionotropic kainate 3 precursor (Glutamate receptor 7) (GluR-7) (GluR7) (Excitatory amino acid receptor 5) (EAA5) [MASS=104031]                 | *    | 3.70  | *    | *    | * | 2 | 2 | SLIVTTVLEEPFVM[147]FR                      | 1                                                                                               |             |
|                                                                                                                                                                                         |      |       |      |      |   |   | 3 | EFRIIFDC[330]SHTMAAQILK                    | 1                                                                                               |             |

|                                                                                                                                                                                                 |      |      |      |      |   |   |             |                                                                              |             |
|-------------------------------------------------------------------------------------------------------------------------------------------------------------------------------------------------|------|------|------|------|---|---|-------------|------------------------------------------------------------------------------|-------------|
| GRIK4_HUMAN (Q16099) Glutamate receptor, ionotropic kainate 4 precursor (Glutamate receptor KA-1) (KA1) (Excitatory amino acid receptor 1) (EAA1) [MASS=107229]                                 | *    | 1.36 | *    | *    | * | 1 | 3           | VAPEEFVKFQFQR                                                                | 1           |
| GRIN1_HUMAN (Q7Z2K8) G protein-regulated inducer of neurite outgrowth 1 (GRIN1) [MASS=102371]                                                                                                   | *    | 2.78 | *    | *    | * | 2 | 2<br>3      | KALGSARSPEGAR<br>ETPQASEKVDPGSC[330]R                                        | 1<br>1      |
| GRK4_HUMAN (P32298) G protein-coupled receptor kinase 4 (EC 2.7.11.16) (G protein-coupled receptor kinase GRK4) (IT11) [MASS=66555]                                                             | *    | 7.44 | *    | *    | * | 3 | 2<br>2<br>2 | GGC[330]LTM[147]VPSEKEVEPK<br>GGC[330]LTM[147]VPSEKEVEPKQC[339]<br>PENILLDDR | 1<br>1<br>1 |
| GRP75_HUMAN (P38646) Stress-70 protein, mitochondrial precursor (75 kDa glucose-regulated protein) (GRP 75) (Peptide-binding protein 74) (PBP74) (Mortalin) (MOT) [MASS=73680]                  | 0.53 | 3.24 | 1.92 | 0.00 | 1 | 2 | 2<br>2      | TIAPC[339]QK<br>M[147]EEFKDQLPADEC[339]NK                                    | 1<br>1      |
| GSLG1_HUMAN (Q92896) Golgi apparatus protein 1 precursor (Golgi sialoglycoprotein MG-160) (E-selectin ligand 1) (ESL-1) (Cysteine-rich fibroblast growth factor receptor) (CFR-1) [MASS=134592] | *    | 2.71 | *    | *    | * | 3 | 3<br>2<br>3 | VC[330]KQM[147]IKR<br>C[330]NVENLPRSR<br>DAHSQGEVWSC[330]LEK                 | 1<br>1<br>1 |
| GSTM3_HUMAN (P21266) Glutathione S-transferase Mu 3 (EC 2.5.1.18) (GSTM3-3) (GST class-mu 3) (hGSTM3-3) [MASS=26428]                                                                            | *    | 5.80 | *    | *    | * | 1 | 3           | M[147]PINNKM[147]AQWGNK                                                      | 1           |
| GTR3_HUMAN (P11169) Solute carrier family 2, facilitated glucose transporter member 3 (Glucose transporter type 3, brain) [MASS=53924]                                                          | 0.00 | 4.44 | 0.73 | 0.00 | 1 | 1 | 3           | RNSMLIVNLLAVTGGC[330]FM[147]GLC[330]K                                        | 1           |
| GTR8_HUMAN (Q9NY64) Solute carrier family 2, facilitated glucose transporter member 8 (Glucose transporter type 8) (Glucose transporter type X1) [MASS=50793]                                   | 0.00 | 5.24 | 0.07 | 0.00 | 1 | 1 | 2           | WLAVLGC[330]VPPSLMLLLM[147]C[330]FM[147]PETPR                                | 1           |
| GUAA_HUMAN (P49915) GMP synthase [glutamine-hydrolyzing] (EC 6.3.5.2) (Glutamine amidotransferase) (GMP synthetase) [MASS=76715]                                                                | 0.00 | 8.80 | 0.40 | 0.00 | 1 | 3 | 2<br>3<br>2 | NFLYDIAGC[330]SGTFTVQNR<br>VINAHSFYNGTTTLPISDEDRTPRK<br>ESQSVEEALKKLGIVK     | 1<br>1<br>1 |



|                                                                                                                                                                                                       |      |       |      |      |   |   |   |                                                   |   |
|-------------------------------------------------------------------------------------------------------------------------------------------------------------------------------------------------------|------|-------|------|------|---|---|---|---------------------------------------------------|---|
| GUAD_HUMAN (Q9Y2T3) Guanine deaminase (EC 3.5.4.3) (Guanase) (Guanine aminase) (Guanine aminohydrolase) (GAH) (p51-nedasin) [MASS=51003]                                                              | *    | 8.15  | *    | *    | * | 2 | 2 | AVMVSNILLINKVNEK                                  | 1 |
|                                                                                                                                                                                                       |      |       |      |      |   |   | 3 | IGLGTDVAGGYSYSM[147]LDAIRR                        | 1 |
| HAOX2_HUMAN (Q9NYQ3) Hydroxyacid oxidase 2 (EC 1.1.3.15) (HAOX2) ((S)-2-hydroxy-acid oxidase, peroxisomal) (Long chain alpha-hydroxy acid oxidase) (Long-chain L-2-hydroxy acid oxidase) [MASS=38839] | 0.37 | 3.99  | 0.45 | 0.00 | 1 | 1 | 2 | ALVITLDTPVC[330]GNR                               | 1 |
| HBB_HUMAN (P68871) Hemoglobin subunit beta (Hemoglobin beta chain) (Beta-globin) [MASS=15867]                                                                                                         | 1.00 | 34.93 | 0.59 | 0.17 | 4 | 3 | 3 | GTFATLSELHC[339]DKLHVDPENFR                       | 2 |
|                                                                                                                                                                                                       |      |       |      |      |   |   | 2 | GTFATLSELHC[330]DK                                | 1 |
|                                                                                                                                                                                                       |      |       |      |      |   |   | 2 | LLGNVLVC[330]VLAHHFGK                             | 1 |
| HCDH_HUMAN (Q16836) Short chain 3-hydroxyacyl-CoA dehydrogenase, mitochondrial precursor (EC 1.1.1.35) (HCDH) (Medium and short chain L-3-hydroxyacyl-coenzyme A dehydrogenase) [MASS=34277]          | 0.00 | 1.91  | 1.40 | 0.00 | 1 | 1 | 2 | HPVSC[339]K                                       | 1 |
| HD_HUMAN (P42858) Huntingtin (Huntington disease protein) (HD protein) [MASS=347857]                                                                                                                  | 0.00 | 4.23  | 5.58 | 0.00 | 1 | 7 | 3 | YITAAAC[339]EM[147]VAEMVESLQSVLALGHKR             | 1 |
|                                                                                                                                                                                                       |      |       |      |      |   |   | 2 | VHPSEDEILAQYLV PATC[330]K                         | 1 |
|                                                                                                                                                                                                       |      |       |      |      |   |   | 2 | LLSASFLLTGKKNVLPDRDVR                             | 1 |
|                                                                                                                                                                                                       |      |       |      |      |   |   | 2 | QPSDSSVDFVLR                                      | 1 |
|                                                                                                                                                                                                       |      |       |      |      |   |   | 2 | NSSMALQQAHLKKNM[147]SHC[330]R                     | 1 |
|                                                                                                                                                                                                       |      |       |      |      |   |   | 3 | TSDPNPAAPDSESVIVAMER                              | 1 |
|                                                                                                                                                                                                       |      |       |      |      |   |   | 2 | EPGEQASVPLSPKK                                    | 1 |
| HEAT1_HUMAN (Q9H583) HEAT repeat-containing protein 1 (Protein BAP28) [MASS=242369]                                                                                                                   | *    | 0.65  | *    | *    | * | 1 | 3 | LQQNISWKKTIVTR                                    | 1 |
| HEAT2_HUMAN (Q86Y56) HEAT repeat-containing protein 2 [MASS=93533]                                                                                                                                    | *    | 1.75  | *    | *    | * | 1 | 2 | PRDALPRLPALAAR                                    | 1 |
| HECD1_HUMAN (Q9ULT8) E3 ubiquitin-protein ligase HECTD1 (HECT domain-containing protein 1) (E3 ligase for inhibin receptor) (EULIR) [MASS=289593]                                                     | 0.00 | 3.64  | 2.09 | 0.00 | 1 | 5 | 3 | TFLPALC[330]KIFLDESAPDNVLEVTAR                    | 1 |
|                                                                                                                                                                                                       |      |       |      |      |   |   | 3 | KSVLEVEFLGEEGTGLGPTLEFYALVAAEFQR                  | 1 |
|                                                                                                                                                                                                       |      |       |      |      |   |   | 2 | LMC[339]MGDIK                                     | 1 |
|                                                                                                                                                                                                       |      |       |      |      |   |   | 3 | ALC[339]NRLVVVELNNRTSR                            | 1 |
|                                                                                                                                                                                                       |      |       |      |      |   |   | 2 | LLAATM[147]EKG FHLN                               | 1 |
| HELI_HUMAN (Q9UKS7) Zinc finger protein Helios [MASS=59559]                                                                                                                                           | *    | 6.27  | *    | *    | * | 2 | 2 | RKQSPAYMK                                         | 1 |
|                                                                                                                                                                                                       |      |       |      |      |   |   | 3 | C[339]EHC[330]RVFLFDHVM[147]YTIHM[147]GC[330]HGYR | 1 |

|                                                                                                                                                                                                                                                                          |      |       |      |      |   |   |                                                                                                         |                                   |   |
|--------------------------------------------------------------------------------------------------------------------------------------------------------------------------------------------------------------------------------------------------------------------------|------|-------|------|------|---|---|---------------------------------------------------------------------------------------------------------|-----------------------------------|---|
| HELZ_HUMAN (P42694) Probable helicase with zinc-finger domain (EC 3.6.1.-) [MASS=218970]                                                                                                                                                                                 | 0.00 | 1.44  | *    | *    | * | 1 | 3                                                                                                       | QIAESANSSSPQSSAGGKPAM[147]SYASALR | 1 |
| HEM1_HUMAN (P13196) 5-aminolevulinate synthase, nonspecific, mitochondrial precursor (EC 2.3.1.37) (5-aminolevulinic acid synthase) (Delta-aminolevulinate synthase) (Delta-ALA synthetase) (ALAS-H) [MASS=70580]                                                        | *    | 2.03  | *    | *    | * | 1 | 2                                                                                                       | GGGIGDRDGVM[147]PK                | 1 |
| HEM6_HUMAN (P36551) Coproporphyrinogen III oxidase, mitochondrial precursor (EC 1.3.3.3) (Coproporphyrinogenase) (Coprogen oxidase) (COX) [MASS=50152]                                                                                                                   | *    | 3.96  | *    | *    | * | 1 | 3                                                                                                       | EGGGGISC[330]VLQDGC[330]VFEK      | 1 |
| HEP2_HUMAN (P05546) Heparin cofactor 2 precursor (Heparin cofactor II) (HC-II) (Protease inhibitor leuserpin 2) (HLS2) [MASS=57070]                                                                                                                                      | *    | 4.21  | *    | *    | * | 1 | 3                                                                                                       | LMGIRMLFDKNGNMAGISDQR             | 1 |
| HGFL_HUMAN (P26927) Hepatocyte growth factor-like protein precursor (Macrophage stimulatory protein) (MSP) (Macrophage-stimulating protein) [Contains: Hepatocyte growth factor-like protein alpha chain; Hepatocyte growth factor-like protein beta chain] [MASS=80380] | 0.00 | 3.94  | 1.27 | 0.10 | 2 | 2 | 1 C[330]GKRVDR<br>3 RC[339]ADDQPPSILDPPDQVQFEK                                                          | 1<br>1                            |   |
| HGF_HUMAN (P14210) Hepatocyte growth factor precursor (Scatter factor) (SF) (Hepatopoeitin A) [Contains: Hepatocyte growth factor alpha chain; Hepatocyte growth factor beta chain] [MASS=83133]                                                                         | 0.40 | 5.22  | 1.38 | 0.00 | 1 | 2 | 2 NKGLPFTC[339]KAFVFDK<br>3 NKGLPFTC[330]KAFVFDK<br>2 C[339]EGDTPPTIVNLDHPVISC[330]AKTK                 | 1<br>1<br>1                       |   |
| HIC1_HUMAN (Q14526) Hypermethylated in cancer 1 protein (Hic-1) (Zinc finger and BTB domain-containing protein 29) [MASS=76467]                                                                                                                                          | *    | 5.59  | *    | *    | * | 2 | 3 ELPPRPDPSPPSAGPAAYK<br>2 PLAERELPPRPDPSPPSAGPAAYK                                                     | 1<br>1                            |   |
| HIG2A_HUMAN (Q9BW72) HIG1 domain family member 2A [MASS=11528]                                                                                                                                                                                                           | 1.00 | 23.58 | 1.24 | 0.00 | 2 | 1 | 3 ENPVVPIGC[330]LATAAAALTYGLYSFHR<br>3 ENPVVPIGC[339]LATAAAALTYGLYSFHR                                  | 1<br>1                            |   |
| HIP1_HUMAN (O00291) Huntingtin-interacting protein 1 (HIP-1) [MASS=115442]                                                                                                                                                                                               | 0.00 | 6.02  | 0.06 | 0.00 | 1 | 4 | 2 TC[330]ILGTHHEK<br>2 LEVNERILGC[339]C[339]TSLM[147]QAIQVLIVASK<br>2 AIGEELLPR<br>3 LKEKYSSELVQNHADLLR | 1<br>1<br>1<br>1                  |   |

|                                                                                                                                                                                                         |      |       |      |      |   |   |   |                                                      |   |
|---------------------------------------------------------------------------------------------------------------------------------------------------------------------------------------------------------|------|-------|------|------|---|---|---|------------------------------------------------------|---|
| HMCN1_HUMAN (Q96RW7) Hemicentin-1 precursor (Fibulin-6) (FIBL-6) [MASS=613386]                                                                                                                          | 0.00 | 1.17  | *    | *    | * | 4 | 2 | EKQSVTLTC[330]EVTGNPVPPEITWHK                        | 1 |
|                                                                                                                                                                                                         |      |       |      |      |   |   | 3 | LMQTTM[147]EDAGQYTC[339]VVRNAAGEER                   | 1 |
|                                                                                                                                                                                                         |      |       |      |      |   |   | 2 | EFEVTVHVPPTIK                                        | 1 |
|                                                                                                                                                                                                         |      |       |      |      |   |   | 1 | YIEAPK                                               | 1 |
| HMCS1_HUMAN (Q01581) Hydroxymethylglutaryl-CoA synthase, cytoplasmic (EC 2.3.3.10) (HMG-CoA synthase) (3-hydroxy-3-methylglutaryl coenzyme A synthase) [MASS=57293]                                     | *    | 5.00  | *    | *    | * | 1 | 3 | DFTLNDFGFM[147]IFHSPYC[330]KLVQKSLAR                 | 1 |
| HPLN2_HUMAN (Q9GZV7) Hyaluronan and proteoglycan link protein 2 precursor (Brain link protein 1) [MASS=37775]                                                                                           | 0.97 | 3.24  | 0.47 | 0.00 | 1 | 1 | 2 | LTLSEAHAAC[330]R                                     | 1 |
|                                                                                                                                                                                                         |      |       |      |      |   |   | 3 | ATSM[147]DLPMPMRFR                                   | 1 |
|                                                                                                                                                                                                         |      |       |      |      |   |   | 2 | LSPLKSKFK                                            | 1 |
|                                                                                                                                                                                                         |      |       |      |      |   |   | 3 | ELQISLKQVLTALLNSRTTSHLLR                             | 1 |
| HRX_HUMAN (Q03164) Zinc finger protein HRX (ALL-1) (Trithorax-like protein) [MASS=431748]                                                                                                               | *    | 3.58  | *    | *    | * | 9 | 1 | RPISR                                                | 1 |
|                                                                                                                                                                                                         |      |       |      |      |   |   | 3 | C[330]RNSYHPEC[339]LGPNYPTK                          | 1 |
|                                                                                                                                                                                                         |      |       |      |      |   |   | 3 | SSEGSAHNVAYPGIPK                                     | 1 |
|                                                                                                                                                                                                         |      |       |      |      |   |   | 3 | GNFC[339]PLC[330]DKC[330]YDDDDYESKMMQC[330]GK        | 1 |
|                                                                                                                                                                                                         |      |       |      |      |   |   | 3 | C[330]GQC[330]PGC[330]QVPEDC[339]GVC[330]TNC[339]LDK | 1 |
|                                                                                                                                                                                                         |      |       |      |      |   |   | 2 | GKQLRC[330]EFC[339]QK                                | 1 |
| HS105_HUMAN (Q92598) Heat-shock protein 105 kDa (Heat shock 110 kDa protein) (Antigen NY-CO-25) [MASS=96864]                                                                                            | *    | 0.58  | *    | *    | * | 1 | 1 | ERIAK                                                | 1 |
| HSP7C_HUMAN (P11142) Heat shock cognate 71 kDa protein (Heat shock 70 kDa protein 8) [MASS=70898]                                                                                                       | 0.00 | 3.41  | 0.59 | 0.00 | 1 | 1 | 2 | GPAVGIDLGTTYSC[330]VGVFQHGK                          | 1 |
|                                                                                                                                                                                                         |      |       |      |      |   |   | 2 | LTTSEEK                                              | 1 |
|                                                                                                                                                                                                         |      |       |      |      |   |   | 2 | SSNQLSWLSVSM DAALGC[339]R                            | 1 |
| HUWE1_HUMAN (Q7Z6Z7) HECT, UBA and WWE domain-containing protein 1 (EC 6.3.2.-) (E3 ubiquitin protein ligase URE-B1) (Mcl-1 ubiquitin ligase E3) (Mule) (ARF-binding protein 1) (ARF-BP1) [MASS=481888] | 0.00 | 3.27  | 0.67 | 0.02 | 2 | 8 | 2 | ENFGFLAEC[330]C[330]RDLHM[147]M[147]K                | 1 |
|                                                                                                                                                                                                         |      |       |      |      |   |   | 2 | SSNQLSWLSVSM[147]DAALGC[339]R                        | 1 |
|                                                                                                                                                                                                         |      |       |      |      |   |   | 2 | YLQSNNSNWR                                           | 1 |
|                                                                                                                                                                                                         |      |       |      |      |   |   | 2 | QIGTLAELR                                            | 1 |
|                                                                                                                                                                                                         |      |       |      |      |   |   | 3 | REESPMDVDQPSQAQDTQSIASDGTTPQGEKEK                    | 1 |
|                                                                                                                                                                                                         |      |       |      |      |   |   | 2 | RQQQAATSESSQSEASVRR                                  | 1 |
|                                                                                                                                                                                                         |      |       |      |      |   |   | 2 | QLM[147]HERLFGHSSTSALSAILRSPAFTSR                    | 1 |
| HV3L_HUMAN (P01773) Ig heavy chain V-III region BUR [MASS=12981]                                                                                                                                        | 0.00 | 15.97 | 0.28 | 0.00 | 1 | 1 | 2 | LSC[330]TASAFNLSDYAM[147]HWVR                        | 1 |
| HXB3_HUMAN (P14651) Homeobox protein Hox-B3 (Hox-2G) (Hox-2.7) [MASS=44344]                                                                                                                             | *    | 9.05  | *    | *    | * | 2 | 2 | SAC[339]SLQSLGNAAPHAKSKELNGSC[330]M[147]R            | 1 |
|                                                                                                                                                                                                         |      |       |      |      |   |   | 3 | RVEMANLLNLSEK                                        | 2 |

|                                                                                                                                                                        |      |       |      |      |    |    |   |                                            |                             |   |
|------------------------------------------------------------------------------------------------------------------------------------------------------------------------|------|-------|------|------|----|----|---|--------------------------------------------|-----------------------------|---|
|                                                                                                                                                                        |      |       |      |      |    |    |   | 2                                          | AAQLC[330]GAGM[147]AAVVDK   | 1 |
|                                                                                                                                                                        |      |       |      |      |    |    |   | 2                                          | AAQLC[339]GAGM[147]AAVVDKIR | 1 |
|                                                                                                                                                                        |      |       |      |      |    |    |   | 2                                          | AILQQLGLNSTC[330]DDSILVK    | 1 |
|                                                                                                                                                                        |      |       |      |      |    |    |   | 2                                          | C[339]NVSFLLSEDGSGK         | 1 |
|                                                                                                                                                                        |      |       |      |      |    |    |   | 2                                          | MIAAQLLAYFTELKDDQVK         | 1 |
|                                                                                                                                                                        |      |       |      |      |    |    |   | 2                                          | LPVGFTFSFPC[330]QQSK        | 2 |
|                                                                                                                                                                        |      |       |      |      |    |    |   | 2                                          | AILQQLGLNSTC[339]DDSILVK    | 1 |
|                                                                                                                                                                        |      |       |      |      |    |    |   | 2                                          | ATDC[339]VGHDVVTLLR         | 1 |
|                                                                                                                                                                        |      |       |      |      |    |    |   | 2                                          | RAAQLC[339]GAGM[147]AAVVDK  | 1 |
|                                                                                                                                                                        |      |       |      |      |    |    |   | 2                                          | AAQLC[339]GAGM[147]AAVVDK   | 2 |
| HXK1_HUMAN (P19367) Hexokinase-1 (EC 2.7.1.1) (Hexokinase type I) (HK I) (Brain form hexokinase) [MASS=102484]                                                         | 1.00 | 17.67 | 1.25 | 0.03 | 20 | 11 |   | 2                                          | KLPVGFTFSFPC[330]QQSK       | 1 |
|                                                                                                                                                                        |      |       |      |      |    |    |   | 2                                          | KLPVGFTFSFPC[339]QQSK       | 2 |
|                                                                                                                                                                        |      |       |      |      |    |    |   | 2                                          | LVPDSDVR                    | 1 |
|                                                                                                                                                                        |      |       |      |      |    |    |   | 2                                          | AAQLC[330]GAGM[147]AAVVDKIR | 1 |
|                                                                                                                                                                        |      |       |      |      |    |    |   | 2                                          | ATDC[330]VGHDVVTLLR         | 1 |
|                                                                                                                                                                        |      |       |      |      |    |    |   | 1                                          | ATDC[330]VGHDVVTLLR         | 1 |
|                                                                                                                                                                        |      |       |      |      |    |    |   | 2                                          | RAAQLC[330]GAGM[147]AAVVDK  | 1 |
|                                                                                                                                                                        |      |       |      |      |    |    |   | 2                                          | LPVGFTFSFPC[339]QQSK        | 2 |
|                                                                                                                                                                        |      |       |      |      |    |    |   | 2                                          | TVC[330]GVVSR               | 1 |
| HYES_HUMAN (P34913) Epoxide hydrolase 2 (EC 3.3.2.3) (Soluble epoxide hydrolase) (SEH) (Epoxide hydratase) (Cytosolic epoxide hydrolase) (CEH) [MASS=62615]            | *    | 4.14  | *    | *    | *  | 1  | 3 | AVASLNTPFIPANPNMSPLESIK                    | 1                           |   |
| IBP5_HUMAN (P24593) Insulin-like growth factor-binding protein 5 precursor (IGFBP-5) (IBP-5) (IGF-binding protein 5) [MASS=30570]                                      | *    | 5.88  | *    | *    | *  | 1  | 3 | PLHALLHGRGVC[339]LNEK                      | 1                           |   |
| ICAM5_HUMAN (Q9UMF0) Intercellular adhesion molecule 5 precursor (ICAM-5) (Telencephalin) [MASS=97330]                                                                 | 0.72 | 10.17 | 0.40 | 0.00 | 1  | 5  | 3 | C[339]EARGNPEPSVHC[330]AR                  | 1                           |   |
|                                                                                                                                                                        |      |       |      |      |    |    | 3 | SDGGAVLALGLLGPVTRALSGETYRC[330]K           | 1                           |   |
|                                                                                                                                                                        |      |       |      |      |    |    | 2 | MPGPSPGLRR                                 | 1                           |   |
|                                                                                                                                                                        |      |       |      |      |    |    | 2 | GNPEPSVHC[330]AR                           | 1                           |   |
|                                                                                                                                                                        |      |       |      |      |    |    | 3 | C[330]KAANDQGEAVKDVTLTVEYAPALDSVGC[339]PER | 1                           |   |
| IDH3A_HUMAN (P50213) Isocitrate dehydrogenase [NAD] subunit alpha, mitochondrial precursor (EC 1.1.1.41) (Isocitric dehydrogenase) (NAD(+)-specific ICDH) [MASS=39591] | 0.99 | 2.46  | 1.43 | 0.01 | 2  | 1  | 2 | C[339]REVAESC[339]K                        | 1                           |   |
|                                                                                                                                                                        |      |       |      |      |    |    | 2 | C[330]REVAESC[330]K                        | 1                           |   |

|                                                                                                                                                                                         |      |       |      |      |   |   |   |                                            |   |
|-----------------------------------------------------------------------------------------------------------------------------------------------------------------------------------------|------|-------|------|------|---|---|---|--------------------------------------------|---|
| IDH3G_HUMAN (P51553) Isocitrate dehydrogenase [NAD] subunit gamma, mitochondrial precursor (EC 1.1.1.41) (Isocitric dehydrogenase) (NAD(+)-specific ICDH) [MASS=42794]                  | 0.96 | 10.43 | 1.56 | 0.00 | 1 | 3 | 2 | TSLDLYANVIHC[339]K                         | 1 |
|                                                                                                                                                                                         |      |       |      |      |   |   | 1 | KKVTAVHK                                   | 1 |
|                                                                                                                                                                                         |      |       |      |      |   |   | 3 | NIANPTATLLASC[339]MM[147]LDHLK             | 1 |
| IDHP_HUMAN (P48735) Isocitrate dehydrogenase [NADP], mitochondrial precursor (EC 1.1.1.42) (Oxalosuccinate decarboxylase) (IDH) (NADP(+)-specific ICDH) (IDP) (ICD-M) [MASS=50909]      | 1.00 | 8.85  | 1.23 | 0.00 | 2 | 3 | 2 | DLAGC[339]IHGLSNVK                         | 1 |
|                                                                                                                                                                                         |      |       |      |      |   |   | 2 | LDGNQDLIR                                  | 1 |
|                                                                                                                                                                                         |      |       |      |      |   |   | 2 | GKLDGNQDLIRFAQMLEK                         | 1 |
|                                                                                                                                                                                         |      |       |      |      |   |   | 2 | DLAGC[330]IHGLSNVK                         | 1 |
| IDLC_HUMAN (O14645) Axonemal dynein light intermediate polypeptide 1 (Inner dynein arm light chain, axonemal) (hp28) [MASS=29662]                                                       | 0.00 | 10.47 | 0.87 | 0.00 | 1 | 2 | 2 | RELYSQC[330]FDELIR                         | 1 |
|                                                                                                                                                                                         |      |       |      |      |   |   | 2 | YDTPVLVSRNTEKR                             | 1 |
| IF122_HUMAN (Q9HBG6) Intraflagellar transport 122 homolog (WD repeat protein 10) [MASS=141968]                                                                                          | 0.38 | 3.70  | 0.57 | 0.52 | 2 | 2 | 2 | RSGHENLALEM[147]YTDLC[339]MFEYAK           | 1 |
|                                                                                                                                                                                         |      |       |      |      |   |   | 3 | AEHC[339]INDIAFKPDGTQLILAAGSR              | 1 |
| IF140_HUMAN (Q96RY7) Intraflagellar transport 140 homolog (WD and tetratricopeptide repeats protein 2) [MASS=165192]                                                                    | 0.00 | 1.50  | 0.63 | 0.00 | 1 | 1 | 3 | YQEALQLC[330]LGQNMSITEEMAEK                | 1 |
| IF2M_HUMAN (P46199) Translation initiation factor IF-2, mitochondrial precursor (IF-2Mt) (IF-2(Mt)) [MASS=81344]                                                                        | *    | 5.91  | *    | *    | * | 2 | 3 | TGM[147]DC[339]GLSLDEDNMEFQVGDIVC[330]YEEK | 1 |
|                                                                                                                                                                                         |      |       |      |      |   |   | 3 | VPVAGC[330]RVQKGQLEK                       | 1 |
| IF4G1_HUMAN (Q04637) Eukaryotic translation initiation factor 4 gamma 1 (eIF-4-gamma 1) (eIF-4G1) (eIF-4G 1) (p220) [MASS=175534]                                                       | *    | 6.62  | *    | *    | * | 6 | 2 | LTPQMFQQLMKQVTQLAIDTEER                    | 1 |
|                                                                                                                                                                                         |      |       |      |      |   |   | 2 | GPQAGLGPRR                                 | 1 |
|                                                                                                                                                                                         |      |       |      |      |   |   | 3 | ITKPGSIDSNNQLFAPGGR                        | 1 |
|                                                                                                                                                                                         |      |       |      |      |   |   | 3 | GEEDADGSKTQDLFRR                           | 1 |
|                                                                                                                                                                                         |      |       |      |      |   |   | 3 | FMLQDVLDLRGSNWVPR                          | 1 |
|                                                                                                                                                                                         |      |       |      |      |   |   | 2 | VFDWIEANLSEQQIVSNTLVR                      | 1 |
| IF4G3_HUMAN (O43432) Eukaryotic translation initiation factor 4 gamma 3 (eIF-4-gamma 3) (eIF-4G 3) (eIF4G 3) (eIF-4-gamma II) (eIF4GII) [MASS=176651]                                   | *    | 1.01  | *    | *    | * | 1 | 2 | SILNKLTPQM[147]FNQLMK                      | 1 |
| IF5A1_HUMAN (P63241) Eukaryotic translation initiation factor 5A-1 (eIF-5A-1) (eIF-5A1) (Eukaryotic initiation factor 5A isoform 1) (eIF-5A) (eIF-4D) (Rev-binding factor) [MASS=16701] | 0.23 | 12.42 | *    | *    | * | 1 | 3 | KYEDIC[330]PSTHNM[147]DVPNIKR              | 1 |

|                                                                                                                                                                                                                                           |                          |       |      |      |   |   |   |                                                                    |        |
|-------------------------------------------------------------------------------------------------------------------------------------------------------------------------------------------------------------------------------------------|--------------------------|-------|------|------|---|---|---|--------------------------------------------------------------------|--------|
| IF5A2_HUMAN (Q9GZV4) Eukaryotic translation initiation factor 5A-2 (eIF-5A-2) (eIF-5A2) (Eukaryotic initiation factor 5A isoform 2) [MASS=16662]                                                                                          | 0.23                     | 30.92 | 0.65 | 0.00 | 1 | 2 | 3 | YNAGEDVQVSVM[147]C[339]AMSEEYAVAIK<br>NDYQLIC[339]IQDGYLSLLTETGEVR | 1<br>1 |
| IFN14_HUMAN (P01570) Interferon alpha-14 precursor (Interferon alpha-H) (LeIF H) (Interferon lambda-2-H) [MASS=22063]                                                                                                                     | 0.00                     | 8.99  | 2.57 | 0.00 | 1 | 1 | 2 | MALPFALMMALVVLSC[339]JK                                            | 1      |
| IFRD1_HUMAN (O00458) Interferon-related developmental regulator 1 (Nerve growth factor-inducible protein PC4) [MASS=50268]                                                                                                                | *                        | 5.10  | *    | *    | * | 1 | 2 | QAALEGIKNALASKM[147]LYEFILER                                       | 1      |
| IGS21_HUMAN (Q96ID5) Immunoglobulin superfamily member 21 precursor [MASS=51835]                                                                                                                                                          | 0.99                     | 3.21  | 0.36 | 0.00 | 1 | 1 | 2 | C[330]TAQNPLGSTDHTR                                                | 1      |
| IGS4B_HUMAN (Q8N126) Immunoglobulin superfamily member 4B precursor (Nectin-like protein 1) (TSLC1-like protein 1) (Synaptic cell adhesion molecule 3) (Brain immunoglobulin receptor) [MASS=43300]                                       | 1.00                     | 23.87 | 0.45 | 0.31 | 5 | 6 | 2 | DHEDSSLQWSNPAQQTLYFGEK                                             | 1      |
|                                                                                                                                                                                                                                           |                          |       |      |      |   |   | 2 | DTATLNC[330]QSSGSKPAAR                                             | 1      |
|                                                                                                                                                                                                                                           |                          |       |      |      |   |   | 2 | EKDTATLNC[330]QSSGSKPAAR                                           | 1      |
|                                                                                                                                                                                                                                           |                          |       |      |      |   |   | 2 | EDDGASIVC[330]SVNHESLK                                             | 1      |
|                                                                                                                                                                                                                                           |                          |       |      |      |   |   | 3 | EDDGASIVC[330]SVNHESLK                                             | 1      |
|                                                                                                                                                                                                                                           |                          |       |      |      |   |   | 3 | EGQKLLLHC[339]EGR                                                  | 1      |
| 2                                                                                                                                                                                                                                         | LLLHC[330]EGR            | 1     |      |      |   |   |   |                                                                    |        |
| 3                                                                                                                                                                                                                                         | EKDTATLNC[330]QSSGSKPAAR | 1     |      |      |   |   |   |                                                                    |        |
| IGSF8_HUMAN (Q969P0) Immunoglobulin superfamily member 8 precursor (CD81 partner 3) (Glu-Trp-Ile EWI motif-containing protein 2) (EWI-2) (Keratinocytes-associated transmembrane protein 4) (KCT-4) (LIR-D1) (CD316 antigen) [MASS=65034] | 0.99                     | 3.10  | 0.39 | 0.00 | 1 | 1 | 2 | LQAQDAGIYEC[330]HTPSTDTR                                           | 1      |
| IKKE_HUMAN (Q14164) Inhibitor of nuclear factor kappa-B kinase epsilon subunit (EC 2.7.11.1) (I kappa-B kinase epsilon) (IkbKE) (IKK-epsilon) (IKK-E) (Inducible I kappa-B kinase) (IKK-i) [MASS=80462]                                   | 0.00                     | 3.91  | 0.43 | 0.00 | 1 | 2 | 3 | LLEELSHQLQDR                                                       | 1      |
|                                                                                                                                                                                                                                           |                          |       |      |      |   |   | 2 | GLHWWMEVLQATC[330]RR                                               | 1      |
| IL1R1_HUMAN (P14778) Interleukin-1 receptor type I precursor (IL-1R-1) (IL-1RT1) (IL-1R-alpha) (p80) (CD121a antigen) [MASS=65402]                                                                                                        | *                        | 2.28  | *    | *    | * | 1 | 3 | FWKNVRYHMPVQR                                                      | 1      |
| IL2_HUMAN (P60568) Interleukin-2 precursor (IL-2) (T-cell growth factor) (TCGF) (Aldesleukin) [MASS=17628]                                                                                                                                | 0.91                     | 33.99 | 1.39 | 0.00 | 1 | 2 | 3 | M[147]YRM[147]QLLSC[339]IALSLALVTNSAPTSSSTKK                       | 1      |
|                                                                                                                                                                                                                                           |                          |       |      |      |   |   | 3 | GSETTFMC[339]EYADETATIVEFLNR                                       | 1      |

|                                                                                                                                                                  |                       |       |      |      |   |   |   |                                              |   |
|------------------------------------------------------------------------------------------------------------------------------------------------------------------|-----------------------|-------|------|------|---|---|---|----------------------------------------------|---|
| IMA7_HUMAN (O60684) Importin alpha-7 subunit (Karyopherin alpha-6) [MASS=60029]                                                                                  | *                     | 3.92  | *    | *    | * | 1 | 3 | YLVSLGC[339]IKPLC[330]DLLTVMDSK              | 1 |
| IMB1_HUMAN (Q14974) Importin beta-1 subunit (Karyopherin beta-1 subunit) (Nuclear factor P97) (Importin 90) [MASS=97170]                                         | 0.82                  | 2.17  | 0.48 | 0.00 | 1 | 1 | 2 | IQFNDLQSLLC[330]ATLQNVLR                     | 1 |
| IMB3_HUMAN (O00410) Importin beta-3 (Karyopherin beta-3) (Ran-binding protein 5) (RanBP5) [MASS=123498]                                                          | *                     | 1.28  | *    | *    | * | 1 | 3 | FLFDSVSSQNVGLR                               | 1 |
| IMMT_HUMAN (Q16891) Mitochondrial inner membrane protein (Mitofilin) (p87/89) (Proliferation-inducing gene 4 protein) [MASS=83677]                               | *                     | 3.69  | *    | *    | * | 2 | 2 | IDQLNRELAEQK                                 | 1 |
|                                                                                                                                                                  |                       |       |      |      |   |   | 2 | ERPPEEVAARLAQKEK                             | 1 |
| INADL_HUMAN (Q8NI35) InaD-like protein (Inadl protein) (hINADL) (Pals1-associated tight junction protein) (Protein associated to tight junctions) [MASS=196385]  | 0.00                  | 2.28  | 1.21 | 0.00 | 1 | 3 | 2 | RQGTAPPPMK                                   | 1 |
|                                                                                                                                                                  |                       |       |      |      |   |   | 2 | QRYADLPGELHIIIELEKDK                         | 1 |
|                                                                                                                                                                  |                       |       |      |      |   |   | 2 | NC[330]GNSVRMLVAR                            | 1 |
| IP3KA_HUMAN (P23677) Inositol-trisphosphate 3-kinase A (EC 2.7.1.127) (Inositol 1,4,5-trisphosphate 3-kinase A) (IP3K A) (IP3 3-kinase A) [MASS=51008]           | *                     | 11.28 | *    | *    | * | 4 | 1 | DMYKK                                        | 1 |
|                                                                                                                                                                  |                       |       |      |      |   |   | 2 | TM[147]VNLPVISPFKK                           | 1 |
|                                                                                                                                                                  |                       |       |      |      |   |   | 3 | NHWQKIRTM[147]VNLPVISPFK                     | 1 |
|                                                                                                                                                                  |                       |       |      |      |   |   | 2 | IRTM[147]VNLPVISPFKK                         | 1 |
| IP3KB_HUMAN (P27987) Inositol-trisphosphate 3-kinase B (EC 2.7.1.127) (Inositol 1,4,5-trisphosphate 3-kinase B) (IP3K B) (IP3 3-kinase B) (IP3K-B) [MASS=102376] | 0.21                  | 10.68 | 0.21 | 0.00 | 1 | 5 | 3 | TKSWGECQ[339]PETSGETDSGR                     | 1 |
|                                                                                                                                                                  |                       |       |      |      |   |   | 3 | YNQM[147]DDLLADFDSPC[330]VM[147]DC[339]KMGIR | 1 |
|                                                                                                                                                                  |                       |       |      |      |   |   | 3 | SGGGPGPSGSETPPPPR                            | 1 |
|                                                                                                                                                                  |                       |       |      |      |   |   | 2 | M[147]AVYC[330]YALNSLVIM[147]NSANEM[147]K    | 1 |
| 3                                                                                                                                                                | MIEVDPEAPTEEEKAQRAVTK | 1     |      |      |   |   |   |                                              |   |
| IPO7_HUMAN (O95373) Importin-7 (Imp7) (Ran-binding protein 7) (RanBP7) [MASS=119516]                                                                             | *                     | 2.41  | *    | *    | * | 1 | 3 | DQM[147]EYMLQNHVFLFSSSELGYM[147]RAR          | 1 |
| IQEC2_HUMAN (Q5JU85) IQ motif and Sec7 domain-containing protein 2 [MASS=161735]                                                                                 | 0.00                  | 3.18  | 2.18 | 0.00 | 1 | 2 | 3 | DVAQC[339]HLHHENPALGRER                      | 1 |
|                                                                                                                                                                  |                       |       |      |      |   |   | 3 | DVLDC[339]VVDSEMDSSMDLDDALRKFQSHIR           | 1 |
| IRAK2_HUMAN (O43187) Interleukin-1 receptor-associated kinase-like 2 (IRAK-2) [MASS=65270]                                                                       | 0.00                  | 7.46  | 1.73 | 0.23 | 2 | 3 | 3 | DLLLSEIPSTASLC[330]SRK                       | 1 |
|                                                                                                                                                                  |                       |       |      |      |   |   | 2 | SMERVQGVSITR                                 | 1 |
|                                                                                                                                                                  |                       |       |      |      |   |   | 3 | LAHPM[147]AHLIC[339]PVNKR                    | 1 |
| ITA1_HUMAN (P56199) Integrin alpha-1 (Laminin and collagen receptor) (VLA-1) (CD49a antigen) [MASS=127837]                                                       | *                     | 8.34  | *    | *    | * | 5 | 3 | QHNSC[339]TTENKNEPC[339]GAR                  | 1 |
|                                                                                                                                                                  |                       |       |      |      |   |   | 3 | SIASEPTEKHFFNVSEDELALVTIVK                   | 1 |
|                                                                                                                                                                  |                       |       |      |      |   |   | 2 | DSC[330]ESNHNITC[330]KVGYPFLR                | 1 |
|                                                                                                                                                                  |                       |       |      |      |   |   | 2 | IVQRGGRQTMTALGTDATAR                         | 1 |
|                                                                                                                                                                  |                       |       |      |      |   |   | 3 | DSC[330]ESNHNITC[330]KVGYPFLR                | 1 |
| 3                                                                                                                                                                | KVM[147]VIVTDGESHDNHR | 1     |      |      |   |   |   |                                              |   |

|                                                                                                                                                                                                                                                                 |      |       |      |      |   |   |   |                                                  |   |
|-----------------------------------------------------------------------------------------------------------------------------------------------------------------------------------------------------------------------------------------------------------------|------|-------|------|------|---|---|---|--------------------------------------------------|---|
| ITA5_HUMAN (P08648) Integrin alpha-5 precursor (Fibronectin receptor subunit alpha) (Integrin alpha-F) (VLA-5) (CD49e antigen) [Contains: Integrin alpha-5 heavy chain; Integrin alpha-5 light chain] [MASS=114536]                                             | *    | 4.48  | *    | *    | * | 2 | 2 | GLELDPEGSLHHQQKREAPSR                            | 1 |
|                                                                                                                                                                                                                                                                 |      |       |      |      |   |   | 2 | SLQWFGATVRAHGSSILAC[330]APLYSWR                  | 1 |
| ITAX_HUMAN (P20702) Integrin alpha-X precursor (Leukocyte adhesion glycoprotein p150,95 alpha chain) (Leukocyte adhesion receptor p150,95) (Leu M5) (CD11c antigen) [MASS=127886]                                                                               | *    | 5.42  | *    | *    | * | 2 | 3 | SAFEC[339]REQVVSEQLVQSNIC[339]LYIDKR             | 1 |
|                                                                                                                                                                                                                                                                 |      |       |      |      |   |   | 3 | IAGSQLSSRLQYFGQALSGGQDLTQDGLVDLAVGAR             | 1 |
| ITB7_HUMAN (P26010) Integrin beta-7 precursor [MASS=86903]                                                                                                                                                                                                      | *    | 4.01  | *    | *    | * | 1 | 3 | PGEPQQLQVRFLRAEGYPVDLYYLM[147]DLSYSMK            | 1 |
| ITB8_HUMAN (P26012) Integrin beta-8 precursor [MASS=85632]                                                                                                                                                                                                      | *    | 4.16  | *    | *    | * | 1 | 3 | ISGNIDTPEGGFDAAMLQAAVC[339]ESHIGWRKEAK           | 1 |
| ITIH1_HUMAN (P19827) Inter-alpha-trypsin inhibitor heavy chain H1 precursor (ITI heavy chain H1) (Inter-alpha-inhibitor heavy chain 1) (Inter-alpha-trypsin inhibitor complex component III) (Serum-derived hyaluronan-associated protein) (SHAP) [MASS=101388] | 0.00 | 2.52  | 1.03 | 0.00 | 1 | 2 | 2 | SLKVNC[330]KVTSR                                 | 1 |
|                                                                                                                                                                                                                                                                 |      |       |      |      |   |   | 3 | ERGHM[147]LENHVER                                | 1 |
| ITLN2_HUMAN (Q8WWU7) Intelectin-2 precursor (Endothelial lectin HL-2) [MASS=36211]                                                                                                                                                                              | *    | 10.46 | *    | *    | * | 1 | 3 | TKNGVVYQTFC[339]DM[147]TSGGGGWTLVASVHENDMRGK     | 1 |
|                                                                                                                                                                                                                                                                 |      |       |      |      |   |   | 1 | QSPDSGR                                          | 1 |
| JAD1A_HUMAN (P29375) Jumonji/ARID domain-containing protein 1A (Retinoblastoma-binding protein 2) (RBBP-2) [MASS=195815]                                                                                                                                        | *    | 6.21  | *    | *    | * | 6 | 2 | QGPVSPGPAPPPSFIMSYK                              | 1 |
|                                                                                                                                                                                                                                                                 |      |       |      |      |   |   | 3 | AMSWQDRARQALATDELSSALAK                          | 1 |
|                                                                                                                                                                                                                                                                 |      |       |      |      |   |   | 2 | TTC[330]FLSALTC[330]SC[339]NPER                  | 1 |
|                                                                                                                                                                                                                                                                 |      |       |      |      |   |   | 2 | ILDLYALSKIVASK                                   | 1 |
|                                                                                                                                                                                                                                                                 |      |       |      |      |   |   | 3 | ILQATHPPSEDRFLHIMEDDSM[147]EEKPLK                | 1 |
| JAG1_HUMAN (P78504) Jagged-1 precursor (Jagged1) (hJ1) (CD339 antigen) [MASS=133798]                                                                                                                                                                            | 0.00 | 3.53  | *    | *    | * | 2 | 3 | DHC[339]RTTPC[339]EVIDSC[330]TVAM[147]ASNDTPEGVR | 1 |
|                                                                                                                                                                                                                                                                 |      |       |      |      |   |   | 2 | RDGNSSLIAAAVEVR                                  | 1 |
| JHD1A_HUMAN (Q9Y2K7) JmjC domain-containing histone demethylation protein 1A (EC 1.14.11.-) (F-box/LRR-repeat protein 11) (F-box and leucine-rich repeat protein 11) (F-box protein FBL7) (F-box protein Lilina) [MASS=132792]                                  | 0.00 | 3.27  | 2.40 | 0.00 | 1 | 2 | 2 | LDLSHC[339]SHLTDQSSNLLTAVGSSTR                   | 1 |
|                                                                                                                                                                                                                                                                 |      |       |      |      |   |   | 2 | VPTIPITKPHTMK                                    | 1 |



|                                                                                                                                                                                                           |      |      |      |      |   |   |   |                                         |   |
|-----------------------------------------------------------------------------------------------------------------------------------------------------------------------------------------------------------|------|------|------|------|---|---|---|-----------------------------------------|---|
| JOS1_HUMAN (Q15040) Josephin-1 (Josephin domain-containing 1) [MASS=23198]                                                                                                                                | 0.00 | 3.96 | 1.24 | 0.00 | 1 | 1 | 2 | RQHWIC[339]VR                           | 1 |
|                                                                                                                                                                                                           |      |      |      |      |   |   | 3 | SSADSNMDDIC[330]KLLR                    | 1 |
|                                                                                                                                                                                                           |      |      |      |      |   |   | 2 | NLGMVC[339]R                            | 6 |
| K0196_HUMAN (Q12768) Protein KIAA0196 [MASS=134286]                                                                                                                                                       | *    | 3.36 | *    | *    | * | 3 |   |                                         |   |
|                                                                                                                                                                                                           |      |      |      |      |   |   | 3 | YSAARSSADSNMDDIC[330]K                  | 1 |
| K0406_HUMAN (O43156) Protein KIAA0406 [MASS=122069]                                                                                                                                                       | 0.00 | 5.79 | 1.02 | 0.00 | 1 | 3 | 3 | VRLELVELVEDLLLKC[339]SQSLVEC[339]AGPLLK | 1 |
|                                                                                                                                                                                                           |      |      |      |      |   |   | 3 | LGFVAVSLLLGLAEQEKSK                     | 1 |
|                                                                                                                                                                                                           |      |      |      |      |   |   | 3 | DFC[339]LLLM[147]SALYPVLEK              | 1 |
| K0552_HUMAN (O60299) Protein KIAA0552 [MASS=71790]                                                                                                                                                        | *    | 9.81 | *    | *    | * | 3 | 2 | QLQEEAARLM[147]R                        | 1 |
|                                                                                                                                                                                                           |      |      |      |      |   |   | 3 | QAGVAAAASLVSDGAEAGGESGTR                | 1 |
|                                                                                                                                                                                                           |      |      |      |      |   |   | 3 | PSELGPPDPRLAM[147]GSVGSVGAHAQEFAMK      | 1 |
| K0690_HUMAN (Q5JTH9) Protein KIAA0690 [MASS=143701]                                                                                                                                                       | *    | 4.09 | *    | *    | * | 3 | 1 | EATTTLHMLTLLK                           | 1 |
|                                                                                                                                                                                                           |      |      |      |      |   |   | 2 | GC[339]QAEADRAEVSR                      | 1 |
|                                                                                                                                                                                                           |      |      |      |      |   |   | 3 | EAELEELEIPPQYQAGGSGIHRPVAKK             | 1 |
| K1196_HUMAN (Q96KM6) Zinc finger protein KIAA1196 [MASS=97263]                                                                                                                                            | 0.00 | 3.36 | 0.14 | 0.00 | 1 | 2 | 2 | MKDDLVPETARLNYTR                        | 1 |
|                                                                                                                                                                                                           |      |      |      |      |   |   | 2 | RAADSLDTC[330]PIPPK                     | 1 |
| K6PF_HUMAN (P08237) 6-phosphofructokinase, muscle type (EC 2.7.1.11) (Phosphofructokinase 1) (Phosphohexokinase) (Phosphofructo-1-kinase isozyme A) (PFK-A) (Phosphofructokinase-M) [MASS=85051]          | 0.00 | 6.16 | 1.03 | 0.00 | 1 | 3 | 2 | GITNLC[330]VIGGDGSLTGADTFR              | 1 |
|                                                                                                                                                                                                           |      |      |      |      |   |   | 3 | KRALVFQPVAELK                           | 1 |
|                                                                                                                                                                                                           |      |      |      |      |   |   | 2 | MGAKAMNWMSGKIK                          | 1 |
| K6PL_HUMAN (P17858) 6-phosphofructokinase, liver type (EC 2.7.1.11) (Phosphofructokinase 1) (Phosphohexokinase) (Phosphofructo-1-kinase isozyme B) (PFK-B) [MASS=84917]                                   | 0.99 | 2.44 | 0.81 | 0.00 | 1 | 1 | 2 | C[330]HDYYTTEFLYNLYSSEGK                | 1 |
| K6PP_HUMAN (Q01813) 6-phosphofructokinase type C (EC 2.7.1.11) (Phosphofructokinase 1) (Phosphohexokinase) (Phosphofructo-1-kinase isozyme C) (PFK-C) (6-phosphofructokinase, platelet type) [MASS=85596] | *    | 7.53 | *    | *    | * | 2 | 3 | FLEHLSGAGKAIGVLTSGGDAQGM[147]NAAVRVVR   | 1 |
|                                                                                                                                                                                                           |      |      |      |      |   |   | 3 | THSINALLIIGFEAYLGLLELSAAR               | 1 |

|                                                                                                                                                                                                    |      |       |      |      |    |   |   |                                         |                                               |   |
|----------------------------------------------------------------------------------------------------------------------------------------------------------------------------------------------------|------|-------|------|------|----|---|---|-----------------------------------------|-----------------------------------------------|---|
| KBL_HUMAN (O75600) 2-amino-3-ketobutyrate coenzyme A ligase, mitochondrial precursor (EC 2.3.1.29) (AKB ligase) (Glycine acetyltransferase) [MASS=45285]                                           | 0.00 | 5.01  | *    | *    | *  | 1 | 2 | ALGGASGGYTTGPGPLVSLLR                   | 1                                             |   |
| KBTB9_HUMAN (Q96CT2) Kelch repeat and BTB domain-containing protein 9 [MASS=71468]                                                                                                                 | 0.00 | 2.60  | 1.44 | 0.00 | 1  | 1 | 2 | EFEVHQNVLASC[339]SLYFK                  | 1                                             |   |
| KC1AL_HUMAN (Q8N752) Casein kinase I isoform alpha-like (EC 2.7.11.1) (CKI-alpha-like) (CK1) [MASS=39072]                                                                                          | *    | 8.31  | *    | *    | *  | 1 | 3 | GFPAEFAM[147]YLNVC[339]RGLRFEEVDPDYMYLR | 1                                             |   |
|                                                                                                                                                                                                    |      |       |      |      |    |   |   | 3                                       | MC[330]DPGM[147]TAFEPEALGNLVEGLDFHR           | 1 |
|                                                                                                                                                                                                    |      |       |      |      |    |   |   | 3                                       | M[147]C[330]DPGM[147]TAFEPEALGNLVEGLDFHR      | 1 |
|                                                                                                                                                                                                    |      |       |      |      |    |   |   | 3                                       | MC[339]DPGM[147]TAFEPEALGNLVEGLDFHR           | 1 |
|                                                                                                                                                                                                    |      |       |      |      |    |   |   | 2                                       | QETVDC[330]LKK                                | 2 |
| KCC2A_HUMAN (Q9UQM7) Calcium/calmodulin-dependent protein kinase type II alpha chain (EC 2.7.11.17) (CaM-kinase II alpha chain) (CaM kinase II alpha subunit) (CaMK-II subunit alpha) [MASS=54029] | 1.00 | 19.04 | 0.64 | 0.11 | 14 | 5 | 2 | STVASC[339]M[147]HR                     | 2                                             |   |
|                                                                                                                                                                                                    |      |       |      |      |    |   |   | 2                                       | QETVDC[339]LKK                                | 1 |
|                                                                                                                                                                                                    |      |       |      |      |    |   |   | 2                                       | STVASC[330]MHR                                | 2 |
|                                                                                                                                                                                                    |      |       |      |      |    |   |   | 2                                       | C[339]VKVLAGQEYAAKIINTK                       | 1 |
|                                                                                                                                                                                                    |      |       |      |      |    |   |   | 3                                       | EYYSEADASHC[339]IQQILEAVLHC[339]HQM[147]GVVHR | 1 |
| KCC2B_HUMAN (Q13554) Calcium/calmodulin-dependent protein kinase type II beta chain (EC 2.7.11.17) (CaM-kinase II beta chain) (CaM kinase II subunit beta) (CaMK-II subunit beta) [MASS=72726]     | 1.00 | 13.55 | 0.89 | 0.02 | 3  | 4 | 3 | SRGAPAC[339]PSPAPFSPLPAPSPRISDILNSVR    | 1                                             |   |
|                                                                                                                                                                                                    |      |       |      |      |    |   |   | 2                                       | WQNVHFHC[330]SGAPVAPLQ                        | 1 |
|                                                                                                                                                                                                    |      |       |      |      |    |   |   | 3                                       | RGSGTPEAEAPRQWPPPC[339]PSPTIPGPLPTPSR         | 1 |
|                                                                                                                                                                                                    |      |       |      |      |    |   |   | 2                                       | LC[339]TGHEYAAK                               | 1 |
|                                                                                                                                                                                                    |      |       |      |      |    |   |   | 2                                       | LC[330]TGHEYAAK                               | 1 |
| KCC2D_HUMAN (Q13557) Calcium/calmodulin-dependent protein kinase type II delta chain (EC 2.7.11.17) (CaM-kinase II delta chain) (CaM kinase II subunit delta) (CaMK-II subunit delta) [MASS=56297] | 0.00 | 2.20  | *    | *    | *  | 1 | 2 | PENLLLASKSK                             | 1                                             |   |

|                                                                                                                                                                                                                                                                               |      |       |      |      |   |   |   |                                            |   |
|-------------------------------------------------------------------------------------------------------------------------------------------------------------------------------------------------------------------------------------------------------------------------------|------|-------|------|------|---|---|---|--------------------------------------------|---|
| KCMA1_HUMAN (Q12791) Calcium-activated potassium channel subunit alpha 1 (Calcium-activated potassium channel, subfamily M subunit alpha 1) (Maxi K channel) (MaxiK) (BK channel) (K(VCA)alpha) (BKCA alpha) (KCa1.1) (Slowpoke homolog) (Slo homolog) (Slo-al [MASS=137559]) | 0.00 | 5.34  | 3.01 | 0.00 | 1 | 4 | 3 | ADLRAVNINLC[339]DMC[339]VILSANQNNIDDTSLQDK | 1 |
|                                                                                                                                                                                                                                                                               |      |       |      |      |   |   | 2 | RPKMSIYK                                   | 1 |
|                                                                                                                                                                                                                                                                               |      |       |      |      |   |   | 2 | MDALIIPVTMEVPC[339]DSR                     | 1 |
|                                                                                                                                                                                                                                                                               |      |       |      |      |   |   | 2 | SWLGRLRFLR                                 | 1 |
| KCNB2_HUMAN (Q92953) Potassium voltage-gated channel subfamily B member 2 (Voltage-gated potassium channel subunit Kv2.2) [MASS=102562]                                                                                                                                       | *    | 1.43  | *    | *    | * | 1 | 2 | ARGPPFLTLSREK                              | 1 |
| KCNG4_HUMAN (Q8TDN1) Potassium voltage-gated channel subfamily G member 4 (Voltage-gated potassium channel subunit Kv6.4) [MASS=58979]                                                                                                                                        | 0.00 | 5.01  | 2.24 | 0.00 | 1 | 1 | 3 | LC[339]RSYEEIVQLC[339]DDYDEDSQEFFFDR       | 1 |
| KCNV2_HUMAN (Q8TDN2) Potassium voltage-gated channel subfamily V member 2 (Voltage-gated potassium channel subunit Kv8.2) [MASS=62459]                                                                                                                                        | 0.00 | 4.77  | 1.12 | 0.00 | 1 | 1 | 3 | DPAVFQLVYNFYLSGVLLVLDGLC[339]PR            | 1 |
|                                                                                                                                                                                                                                                                               |      |       |      |      |   |   | 2 | FC[339]TGLTQIETLFK                         | 1 |
| KCRB_HUMAN (P12277) Creatine kinase B-type (EC 2.7.3.2) (Creatine kinase B chain) (B-CK) [MASS=42644]                                                                                                                                                                         | 1.00 | 15.75 | 0.75 | 0.12 | 5 | 4 | 2 | FC[330]TGLTQIETLFK                         | 1 |
|                                                                                                                                                                                                                                                                               |      |       |      |      |   |   | 2 | GFC[330]LPPHC[330]SR                       | 2 |
|                                                                                                                                                                                                                                                                               |      |       |      |      |   |   | 3 | LAVEALSSLDGDLAGR                           | 1 |
|                                                                                                                                                                                                                                                                               |      |       |      |      |   |   | 3 | LRFPAEDEFDLSAHNNHMAK                       | 1 |
|                                                                                                                                                                                                                                                                               |      |       |      |      |   |   | 1 | FC[330]TGLTQIETLFK                         | 1 |
| KCRS_HUMAN (P17540) Creatine kinase, sarcomeric mitochondrial precursor (EC 2.7.3.2) (S-MtCK) (Mib-CK) (Basic-type mitochondrial creatine kinase) [MASS=47520]                                                                                                                | 0.00 | 6.21  | *    | *    | * | 2 | 2 | LGYILTC[330]PSNLGTGLR                      | 1 |
|                                                                                                                                                                                                                                                                               |      |       |      |      |   |   | 2 | GLSLPPAC[339]TR                            | 1 |

|                                                                                                                                                                 |      |       |       |      |    |   |   |                                          |   |
|-----------------------------------------------------------------------------------------------------------------------------------------------------------------|------|-------|-------|------|----|---|---|------------------------------------------|---|
|                                                                                                                                                                 |      |       |       |      |    |   | 2 | HNNC[330]M[147]ASHLTPAVYAR               | 1 |
|                                                                                                                                                                 |      |       |       |      |    |   | 2 | SEVELVQLVIDGVNYLIDC[330]ER               | 3 |
| KCRU_HUMAN (P12532) Creatine kinase, ubiquitous mitochondrial precursor (EC 2.7.3.2) (U-MtCK) (Mia-CK) (Acidic-type mitochondrial creatine kinase) [MASS=47036] | 1.00 | 8.87  | 1.19  | 0.04 | 13 | 2 | 3 | SEVELVQLVIDGVNYLIDC[330]ER               | 1 |
|                                                                                                                                                                 |      |       |       |      |    |   | 3 | HNNC[330]M[147]ASHLTPAVYAR               | 1 |
|                                                                                                                                                                 |      |       |       |      |    |   | 2 | SEVELVQLVIDGVNYLIDC[339]ER               | 3 |
|                                                                                                                                                                 |      |       |       |      |    |   | 3 | SEVELVQLVIDGVNYLIDC[339]ER               | 3 |
|                                                                                                                                                                 |      |       |       |      |    |   | 2 | HNNC[339]M[147]ASHLTPAVYAR               | 1 |
| KCTD5_HUMAN (Q9NXV2) Potassium channel tetramerization domain-containing protein 5 [MASS=26092]                                                                 | *    | 10.68 | *     | *    | *  | 1 | 3 | GGIGAGLGGGLC[330]RRC[330]SAGLGALAQR      | 1 |
| KGP1B_HUMAN (P14619) cGMP-dependent protein kinase 1, beta isozyme (EC 2.7.11.12) (cGK 1 beta) (cGKI-beta) [MASS=77803]                                         | *    | 4.96  | *     | *    | *  | 1 | 3 | QAISAEPTAFDIQDLSHVTLPFYPKSPQSKDLIK       | 1 |
| KI13A_HUMAN (Q9H1H9) Kinesin-like protein KIF13A (Kinesin-like protein RBKIN) [MASS=202258]                                                                     | *    | 1.77  | *     | *    | *  | 1 | 3 | PVQHSGTLP[147]VEAILSVSIGC[330]VTARSTKLQR | 1 |
| KI13B_HUMAN (Q9NQT8) Kinesin-like protein KIF13B (Kinesin-like protein GAKIN) [MASS=202665]                                                                     | 0.00 | 3.78  | 15.05 | 0.00 | 1  | 3 | 3 | TVAATNMNEESSRSHAVLKITLHTLYDAK            | 1 |
|                                                                                                                                                                 |      |       |       |      |    |   | 2 | LHVEVMRLSGDVGER                          | 1 |
|                                                                                                                                                                 |      |       |       |      |    |   | 3 | SYTM[147]M[147]GTADQPGLIPRLC[339]SGLFER  | 1 |
| KI21A_HUMAN (Q7Z4S6) Kinesin family member 21A (Kinesin-like protein KIF2) (NY-REN-62 antigen) [MASS=187178]                                                    | *    | 3.11  | *     | *    | *  | 3 | 2 | IPVARVQALPTPATNGNRK                      | 1 |
|                                                                                                                                                                 |      |       |       |      |    |   | 2 | KSNIRIHEDSTGGIYTVGVTTTR                  | 1 |
|                                                                                                                                                                 |      |       |       |      |    |   | 2 | DLLQQVPNAHK                              | 1 |
|                                                                                                                                                                 |      |       |       |      |    |   | 3 | RIEPAEELNSNDM[147]KTNK                   | 1 |
|                                                                                                                                                                 |      |       |       |      |    |   | 2 | AHTEKVHVPARPYR                           | 1 |
|                                                                                                                                                                 |      |       |       |      |    |   | 3 | DSVAQGTTNVHSSEHAGRNGRNAADPISGDFK         | 1 |
| KI67_HUMAN (P46013) Antigen KI-67 [MASS=358743]                                                                                                                 | *    | 4.15  | *     | *    | *  | 7 | 2 | ELFQTPGPSEESMTDEK                        | 1 |
|                                                                                                                                                                 |      |       |       |      |    |   | 3 | QDKTEAEQQITEVFVLAERIEINR                 | 2 |
|                                                                                                                                                                 |      |       |       |      |    |   | 3 | VSGNPQVHIKNVK                            | 1 |
|                                                                                                                                                                 |      |       |       |      |    |   | 2 | ITEGKVSGNPQVHIKNVK                       | 1 |

|                                                                                                                                                                                                                       |      |       |      |      |   |   |   |                                                        |   |
|-----------------------------------------------------------------------------------------------------------------------------------------------------------------------------------------------------------------------|------|-------|------|------|---|---|---|--------------------------------------------------------|---|
| KIF11_HUMAN (P52732) Kinesin-like protein KIF11 (Kinesin-related motor protein Eg5) (Kinesin-like spindle protein HKSP) (Thyroid receptor-interacting protein 5) (TRIP5) (Kinesin-like protein 1) [MASS=119273]       | *    | 4.54  | *    | *    | * | 4 | 2 | M[147]ASQPNSSAKKK                                      | 1 |
|                                                                                                                                                                                                                       |      |       |      |      |   |   | 2 | DVSGLHSLDRK                                            | 1 |
|                                                                                                                                                                                                                       |      |       |      |      |   |   | 2 | TQELETTQKHLQETK                                        | 1 |
|                                                                                                                                                                                                                       |      |       |      |      |   |   | 2 | GINTLERSK                                              | 1 |
| KIF6_HUMAN (Q6ZMV9) Kinesin-like protein KIF6 [MASS=92539]                                                                                                                                                            | 0.00 | 6.76  | 1.09 | 0.00 | 1 | 2 | 3 | NSM[147]M[147]TSVLRDSLGGNC[330]MTTM[147]IATLSLEKR      | 1 |
|                                                                                                                                                                                                                       |      |       |      |      |   |   | 3 | ILENNTVSSSESKDQDC[339]QEPLKEEEYR                       | 1 |
| KLF17_HUMAN (Q5JT82) Krueppel-like factor 17 (Zinc finger protein 393) [MASS=42577]                                                                                                                                   | *    | 13.62 | *    | *    | * | 2 | 3 | KHTGERPYSC[330]NWESC[339]SWSFFR                        | 1 |
|                                                                                                                                                                                                                       |      |       |      |      |   |   | 3 | M[147]IYC[339]QRM[147]SPPQQEM[147]TIFSGPQLMPVGEPNIPR   | 1 |
| KLF4_HUMAN (O43474) Krueppel-like factor 4 (Epithelial zinc-finger protein EZF) (Gut-enriched krueppel-like factor) [MASS=50078]                                                                                      | *    | 2.98  | *    | *    | * | 1 | 2 | RTATHTC[330]DYAGC[339]GK                               | 1 |
| KNTC1_HUMAN (P50748) Kinetochore-associated protein 1 (Rough deal homolog) (hRod) (HsROD) (Rod) [MASS=250747]                                                                                                         | 0.00 | 2.63  | 0.76 | 0.00 | 1 | 4 | 1 | KLQGQIK                                                | 1 |
|                                                                                                                                                                                                                       |      |       |      |      |   |   | 2 | AVIFIRENATLLHKVFNC[330]R                               | 1 |
|                                                                                                                                                                                                                       |      |       |      |      |   |   | 2 | TKYFQM[147]LK                                          | 1 |
|                                                                                                                                                                                                                       |      |       |      |      |   |   | 3 | QYIQLLELPAFALAC[330]LM[147]LM[147]PHSEK                | 1 |
| KPCA_HUMAN (P17252) Protein kinase C alpha type (EC 2.7.11.13) (PKC-alpha) (PKC-A) [MASS=76632]                                                                                                                       | *    | 3.43  | *    | *    | * | 1 | 3 | LTDFNFLM[147]VLGKGSFGKVMLADR                           | 1 |
| KPCB_HUMAN (P05771) Protein kinase C beta type (EC 2.7.11.13) (PKC-beta) (PKC-B) [MASS=76737]                                                                                                                         | 0.00 | 4.03  | 0.89 | 0.00 | 1 | 2 | 2 | RC[330]VM[147]NVPSLC[339]GTDHTER                       | 1 |
|                                                                                                                                                                                                                       |      |       |      |      |   |   | 2 | C[339]DTC[339]M[147]M[147]NVHK                         | 1 |
| KPCD_HUMAN (Q05655) Protein kinase C delta type (EC 2.7.11.13) (nPKC-delta) [MASS=77477]                                                                                                                              | *    | 6.21  | *    | *    | * | 2 | 2 | LLAEALNQVTQRASR                                        | 1 |
|                                                                                                                                                                                                                       |      |       |      |      |   |   | 3 | VIQIVLM[147]RAAEEPVSEVTGVSVLAER                        | 1 |
| KPCE_HUMAN (Q02156) Protein kinase C epsilon type (EC 2.7.11.13) (nPKC-epsilon) [MASS=83673]                                                                                                                          | 0.00 | 6.11  | 1.65 | 0.00 | 1 | 3 | 3 | AASSPDGQLM[147]SPGENGEVRQGQAKR                         | 1 |
|                                                                                                                                                                                                                       |      |       |      |      |   |   | 3 | RC[339]ETNVAPNC[339]GVDAR                              | 1 |
|                                                                                                                                                                                                                       |      |       |      |      |   |   | 1 | VFRER                                                  | 1 |
| KPYM_HUMAN (P14618) Pyruvate kinase isozymes M1/M2 (EC 2.7.1.40) (Pyruvate kinase muscle isozyme) (Cytosolic thyroid hormone-binding protein) (CTHBP) (THBP1) [MASS=57805]                                            | 0.99 | 3.21  | 1.16 | 0.00 | 1 | 1 | 2 | AGKPVIC[330]ATQM[147]LESM[147]IK                       | 1 |
| KR108_HUMAN (P60410) Keratin-associated protein 10-8 (Keratin-associated protein 10.8) (High sulfur keratin-associated protein 10.8) (Keratin-associated protein 18-8) (Keratin-associated protein 18.8) [MASS=26318] | *    | 11.20 | *    | *    | * | 1 | 3 | M[147]ADAC[330]C[330]TRTYVIAASTM[147]SVC[330]SSDVGRVSR | 1 |

|                                                                                                                                                                                                  |      |       |      |      |   |   |   |                                    |   |
|--------------------------------------------------------------------------------------------------------------------------------------------------------------------------------------------------|------|-------|------|------|---|---|---|------------------------------------|---|
| KREM2_HUMAN (Q8NCW0) Kremen protein 2 precursor (Kringle-containing protein marking the eye and the nose) (Kringle domain-containing transmembrane protein 2) (Dickkopf receptor 2) [MASS=48849] | 0.00 | 2.38  | *    | *    | * | 2 | 1 | SLISAL                             | 1 |
|                                                                                                                                                                                                  |      |       |      |      |   |   | 1 | GHQNR                              | 1 |
| KRHB1_HUMAN (Q14533) Keratin, type II cuticular Hb1 (Hair keratin, type II Hb1) (ghHkb1) (ghHb1) (MLN 137) [MASS=54971]                                                                          | *    | 2.38  | *    | *    | * | 1 | 2 | ATAENEFVALKK                       | 1 |
| KRHB3_HUMAN (P78385) Keratin, type II cuticular Hb3 (Hair keratin, type II Hb3) [MASS=54214]                                                                                                     | *    | 3.65  | *    | *    | * | 1 | 2 | PC[339]GQLN TTC[339]GGGSC[339]GQGR | 1 |
| KRIT1_HUMAN (O00522) Krev interaction trapped protein 1 (Krev interaction trapped 1) (Cerebral cavernous malformations 1 protein) [MASS=84347]                                                   | *    | 2.04  | *    | *    | * | 1 | 2 | SKAPHWTNRILHEYK                    | 1 |
| KSR2_HUMAN (Q6VAB6) Kinase suppressor of ras-2 (hKSR2) [MASS=93585]                                                                                                                              | *    | 7.72  | *    | *    | * | 3 | 2 | KLIHLIPGFTALHR                     | 1 |
|                                                                                                                                                                                                  |      |       |      |      |   |   | 2 | PPGTPPPSSRKLHLIPGFTALHR            | 1 |
|                                                                                                                                                                                                  |      |       |      |      |   |   | 2 | TQPAEAIWQM[147]GTGMKPNLSQIGMGK     | 1 |
| L1CAM_HUMAN (P32004) Neural cell adhesion molecule L1 precursor (N-CAM L1) (CD171 antigen) [MASS=140002]                                                                                         | 0.98 | 1.43  | 0.68 | 0.00 | 1 | 2 | 1 | EMAPEK                             | 1 |
|                                                                                                                                                                                                  |      |       |      |      |   |   | 2 | C[339]EASGKPEVQFR                  | 1 |
| LAMA2_HUMAN (P24043) Laminin alpha-2 chain precursor (Laminin M chain) (Merosin heavy chain) [MASS=342769]                                                                                       | 0.00 | 1.61  | 0.07 | 0.00 | 1 | 3 | 3 | C[339]IC[339]PPNTIGEKC[330]SK      | 1 |
|                                                                                                                                                                                                  |      |       |      |      |   |   | 3 | IRTLNADLMM[147]FAHKDPR             | 1 |
|                                                                                                                                                                                                  |      |       |      |      |   |   | 2 | GYTGYPDC[330]KAC[330]NC[330]SGLGSK | 1 |
| LANC1_HUMAN (O43813) LanC-like protein 1 (40 kDa erythrocyte membrane protein) (p40) [MASS=45283]                                                                                                | 0.00 | 5.51  | 1.12 | 0.00 | 1 | 1 | 2 | IPQSHIQIC[339]ETILTSGENLAR         | 1 |
| LANC2_HUMAN (Q9NS86) LanC-like protein 2 (Testis-specific adriamycin sensitivity protein) [MASS=50854]                                                                                           | 0.00 | 10.67 | 2.68 | 0.00 | 1 | 2 | 2 | KQYVGA AHGM[147]AGIYYMLM[147]QPAAK | 1 |
|                                                                                                                                                                                                  |      |       |      |      |   |   | 3 | TADPHDC[339]SAYTGWTGIALLYLQLYR     | 1 |
| LASS4_HUMAN (Q9HA82) LAG1 longevity assurance homolog 4 [MASS=46399]                                                                                                                             | *    | 3.30  | *    | *    | * | 1 | 2 | MLYSFMKKGQMEK                      | 1 |
| LASS6_HUMAN (Q6ZMG9) LAG1 longevity assurance homolog 6 [MASS=44890]                                                                                                                             | 0.00 | 5.21  | 0.68 | 0.00 | 1 | 1 | 3 | FQKMC[330]DLLFVMFAVVFITTR          | 1 |
| LBC_HUMAN (Q12802) LBC oncogene (P47) (Lymphoid blast crisis oncogene) [MASS=49052]                                                                                                              | *    | 8.25  | *    | *    | * | 2 | 2 | M[147]KSGQM[147]FAKEDLK            | 1 |
|                                                                                                                                                                                                  |      |       |      |      |   |   | 3 | NFLIKRIGDVLVNQFSGENAER             | 1 |



|                                                                                                                                                                                                 |      |      |      |      |   |   |   |                                          |   |
|-------------------------------------------------------------------------------------------------------------------------------------------------------------------------------------------------|------|------|------|------|---|---|---|------------------------------------------|---|
| LRC21_HUMAN (Q9P2V4) Leucine-rich repeat-containing protein 21 precursor (Photoreceptor-associated LRR superfamily protein) (Retina-specific protein PAL) [MASS=68040]                          | *    | 6.26 | *    | *    | * | 2 | 2 | YVAC[330]VC[339]VQGLVPRK                 | 1 |
|                                                                                                                                                                                                 |      |      |      |      |   |   | 3 | SLLGGTALLRC[339]GATGVPGPEMSWRR           | 1 |
| LRC27_HUMAN (Q9C0I9) Leucine-rich repeat-containing protein 27 [MASS=60089]                                                                                                                     | 0.00 | 6.23 | 0.84 | 0.00 | 1 | 2 | 2 | LGLTLNKDR                                | 2 |
|                                                                                                                                                                                                 |      |      |      |      |   |   | 2 | HC[330]PLEFPPQLVVQKGLVAIQRFLR            | 1 |
| LRC47_HUMAN (Q8N1G4) Leucine-rich repeat-containing protein 47 [MASS=63472]                                                                                                                     | 0.99 | 5.66 | 0.65 | 0.38 | 2 | 2 | 2 | LFTLPLLHYLEVSGC[330]GSLR                 | 1 |
|                                                                                                                                                                                                 |      |      |      |      |   |   | 3 | GPLLYC[330]ARPPQDLK                      | 1 |
| LRC8C_HUMAN (Q8TDW0) Leucine-rich repeat-containing protein 8C (Protein AD158) [MASS=92391]                                                                                                     | 0.00 | 5.48 | 1.29 | 0.00 | 1 | 3 | 3 | YFPYLVIHTLVFMLC[339]SNFWFK               | 1 |
|                                                                                                                                                                                                 |      |      |      |      |   |   | 2 | FVVDKSTAGALDKK                           | 1 |
|                                                                                                                                                                                                 |      |      |      |      |   |   | 1 | STAGALDK                                 | 1 |
| LRIG1_HUMAN (Q96JA1) Leucine-rich repeats and immunoglobulin-like domains protein 1 precursor (LIG-1) [MASS=119052]                                                                             | 0.00 | 4.67 | 0.69 | 0.57 | 2 | 4 | 2 | LC[330]AGSAYHK                           | 1 |
|                                                                                                                                                                                                 |      |      |      |      |   |   | 2 | QVTFGHEGR                                | 2 |
| LRMP_HUMAN (Q12912) Lymphoid-restricted membrane protein (Protein Jaw1) [MASS=62092]                                                                                                            | *    | 5.59 | *    | *    | * | 1 | 2 | DASHFPEPDTHSVAC[330]R                    | 1 |
|                                                                                                                                                                                                 |      |      |      |      |   |   | 2 | RM[147]HVM[147]PDDDVFFITDVK              | 1 |
| LRP1_HUMAN (Q07954) Low-density lipoprotein receptor-related protein 1 precursor (LRP) (Alpha-2-macroglobulin receptor) (A2MR) (Apolipoprotein E receptor) (APOER) (CD91 antigen) [MASS=504573] | 0.99 | 3.96 | 0.69 | 0.08 | 2 | 9 | 3 | EEDTRSASPTIEAQGTSPAHDNIAFQDSTSK          | 1 |
|                                                                                                                                                                                                 |      |      |      |      |   |   | 3 | IFVC[339]NRNGDTC[330]VTLLEDLELYNPK       | 1 |
|                                                                                                                                                                                                 |      |      |      |      |   |   | 3 | C[339]QPRYTGDKC[330]ELDQC[330]WEHC[330]R | 1 |
|                                                                                                                                                                                                 |      |      |      |      |   |   | 2 | ELQGNC[339]SR                            | 1 |
|                                                                                                                                                                                                 |      |      |      |      |   |   | 3 | ILWIDARSDAIYSARYDGGSGHM[147]EVLK         | 1 |
|                                                                                                                                                                                                 |      |      |      |      |   |   | 3 | GRGQRAC[330]AC[330]AHGMLAEDGASC[330]R    | 1 |
|                                                                                                                                                                                                 |      |      |      |      |   |   | 3 | C[339]DGERDC[339]PDGSDEAPEIC[339]PQSK    | 1 |
|                                                                                                                                                                                                 |      |      |      |      |   |   | 3 | C[330]LC[339]VEGYAPRGGDPHSC[339]K        | 1 |
|                                                                                                                                                                                                 |      |      |      |      |   |   | 3 | C[339]DGERDC[330]PDGSDEAPEIC[339]PQSKAQR | 1 |
|                                                                                                                                                                                                 |      |      |      |      |   |   | 3 | RILWIDARSDAIYSAR                         | 1 |
| LRRN3_HUMAN (Q9H3W5) Leucine-rich repeats neuronal protein 3 precursor (Neuronal leucine-rich repeat protein 3) (NLRR-3) [MASS=79424]                                                           | 0.00 | 3.53 | 0.64 | 0.00 | 1 | 2 | 1 | STSLKVK                                  | 5 |
| LSAMP_HUMAN (Q13449) Limbic system-associated membrane protein precursor (LSAMP) [MASS=37308]                                                                                                   | 0.99 | 6.80 | 0.63 | 0.00 | 1 | 1 | 2 | EGGLYTC[330]IATNLVGADLK                  | 1 |
|                                                                                                                                                                                                 |      |      |      |      |   |   | 3 | IQKVDVYDEGSYTC[330]SVQTQHEPK             | 1 |



|                                                                                                                                                                                                               |      |       |      |      |   |   |   |                                                                                                                                           |                       |
|---------------------------------------------------------------------------------------------------------------------------------------------------------------------------------------------------------------|------|-------|------|------|---|---|---|-------------------------------------------------------------------------------------------------------------------------------------------|-----------------------|
| LTK_HUMAN (P29376) Leukocyte tyrosine kinase receptor precursor (EC 2.7.10.1) (Protein tyrosine kinase 1) [MASS=91653]                                                                                        | 0.00 | 6.48  | 0.34 | 0.00 | 1 | 2 | 3 | TLPELC[330]SPQDELDFLM[147]EALIISK<br>PPGPLVLMVAVVATSTLSLLMVC[339]GVLILVKQKK                                                               | 1<br>1                |
| LY6H_HUMAN (O94772) Lymphocyte antigen Ly-6H precursor [MASS=14669]                                                                                                                                           | 0.97 | 20.71 | 0.66 | 0.00 | 1 | 2 | 2 | DHSVNKMC[330]ASSC[330]DFVK<br>QC[339]QPSDTVVC[339]ASVR                                                                                    | 1<br>1                |
| M2OM_HUMAN (Q02978) Mitochondrial 2-oxoglutarate/malate carrier protein (OGCP) (Solute carrier family 25 member 11) [MASS=33930]                                                                              | 1.00 | 17.57 | 0.85 | 0.00 | 2 | 3 | 3 | LTGADGTPPGFLLKAVIGM[147]TAGATGAFVGTAEVALIR<br>GC[330]IPTM[147]AR<br>M[147]QLSGEGAK<br>GC[339]IPTM[147]AR                                  | 1<br>1<br>1<br>1      |
| M3K14_HUMAN (Q99558) Mitogen-activated protein kinase kinase kinase 14 (EC 2.7.11.25) (NF-kappa beta-inducing kinase) (Serine/threonine-protein kinase NIK) (HsNIK) [MASS=104041]                             | *    | 1.16  | *    | *    | * | 1 | 2 | SPWRGEYKEPR                                                                                                                               | 1                     |
| M3K4_HUMAN (Q9Y6R4) Mitogen-activated protein kinase kinase kinase 4 (EC 2.7.11.25) (MAPK/ERK kinase kinase 4) (MEK kinase 4) (MEK4) (MAP three kinase 1) [MASS=181550]                                       | 0.00 | 1.18  | 0.29 | 0.00 | 1 | 1 | 3 | GGEAQAGKLF3[330]DIAGMLLK                                                                                                                  | 1                     |
| M3K5_HUMAN (Q99683) Mitogen-activated protein kinase kinase kinase 5 (EC 2.7.11.25) (MAPK/ERK kinase kinase 5) (MEK kinase 5) (MEK5) (Apoptosis signal-regulating kinase 1) (ASK-1) [MASS=154536]             | 0.00 | 2.91  | 0.48 | 0.00 | 1 | 3 | 2 | QELVDFWM[147]DFLVEATK<br>VYC[330]C[330]DSSFM[147]K<br>C[339]LRLRGGMLC[339]TLWK                                                            | 1<br>1<br>1           |
| MACF1_HUMAN (Q9UPN3) Microtubule-actin crosslinking factor 1, isoforms 1/2/3/5 (Actin cross-linking family protein 7) (Macrophin-1) (Trabeculin-alpha) (620 kDa actin-binding protein) (ABP620) [MASS=620414] | 0.00 | 1.77  | 1.98 | 0.00 | 1 | 5 | 3 | TGSLEEMTQRLR<br>ATSSETKESTDIEKAILEQQVLSEELTTK<br>MEEVHKEANSVLQWLESK<br>LEAMNQC[339]WESVLQK<br>QRVNSGC[339]VM[147]M[147]ENKLEGIGQFHC[339]R | 1<br>1<br>1<br>1<br>1 |
| MACF4_HUMAN (Q96PK2) Microtubule-actin crosslinking factor 1, isoform 4 [MASS=670146]                                                                                                                         | 0.00 | 0.39  | *    | *    | * | 2 | 2 | EMTSSEK GK<br>EYPDREDC[330]TTEK GK                                                                                                        | 1<br>1                |
| MAML3_HUMAN (Q96JK9) Mastermind-like protein 3 (Mam-3) [MASS=121692]                                                                                                                                          | 0.00 | 4.85  | *    | *    | * | 2 | 3 | SGAGTGKQQHPSKPQQDAEASAEQR<br>TTMNNYLPQNHMMN[147]INQQPNNLGTNSLNK                                                                           | 1<br>1                |
| MAON_HUMAN (Q16798) NADP-dependent malic enzyme, mitochondrial precursor (EC 1.1.1.40) (NADP-ME) (Malic enzyme 3) [MASS=67054]                                                                                | 1.00 | 3.15  | 1.14 | 0.00 | 2 | 1 | 2 | FGINC[330]LIQFEDFANANA FR<br>FGINC[339]LIQFEDFANANA FR                                                                                    | 1<br>1                |

|                                                                                                                                                                                                                                                                             |      |       |      |      |   |   |   |                                              |   |
|-----------------------------------------------------------------------------------------------------------------------------------------------------------------------------------------------------------------------------------------------------------------------------|------|-------|------|------|---|---|---|----------------------------------------------|---|
| MAP1B_HUMAN (P46821) Microtubule-associated protein 1B (MAP 1B) [Contains: MAP1 light chain LC1] [MASS=270618]                                                                                                                                                              | *    | 2.23  | *    | *    | * | 3 | 2 | TPVQDHR                                      | 1 |
|                                                                                                                                                                                                                                                                             |      |       |      |      |   |   | 3 | SGKQGSPDQVSPVSEM[147]TSTSLYQDK               | 1 |
|                                                                                                                                                                                                                                                                             |      |       |      |      |   |   | 3 | HPDVSMVDPEALAIEQNLGKALK                      | 1 |
| MASP2_HUMAN (O00187) Mannan-binding lectin serine protease 2 precursor (EC 3.4.21.104) (Mannose-binding protein-associated serine protease 2) (MASP-2) (MBL-associated serine protease 2) [Contains: Mannan-binding lectin serine protease 2 A chain; Mannan-b [MASS=75685] | 0.00 | 11.81 | 3.28 | 0.00 | 1 | 3 | 3 | IHYTSTAHAC[330]PYPMAPPNGHVSPVQAK             | 1 |
|                                                                                                                                                                                                                                                                             |      |       |      |      |   |   | 3 | YILKDSFSIFC[330]ETGYELLQGHPLPK               | 1 |
|                                                                                                                                                                                                                                                                             |      |       |      |      |   |   | 3 | C[339]TAAYEKPPYPRGSVTANM[147]LC[339]AGLESGGK | 1 |
| MAST3_HUMAN (O60307) Microtubule-associated serine/threonine-protein kinase 3 (EC 2.7.11.1) [MASS=143136]                                                                                                                                                                   | 0.66 | 5.42  | 0.15 | 0.00 | 1 | 3 | 2 | ATGTFDNEIVMM[147]NHVYR                       | 1 |
|                                                                                                                                                                                                                                                                             |      |       |      |      |   |   | 3 | LALADGVLGFIHHQIVELARDC[330]LAKSGENLVTSR      | 1 |
|                                                                                                                                                                                                                                                                             |      |       |      |      |   |   | 3 | ERLHQLPFQPTDELHFLSK                          | 1 |
| MATR3_HUMAN (P43243) Matrin-3 [MASS=94623]                                                                                                                                                                                                                                  | *    | 6.02  | *    | *    | * | 3 | 1 | KDGSASAAK                                    | 1 |
|                                                                                                                                                                                                                                                                             |      |       |      |      |   |   | 2 | SQESGYDRM[147]DYEDDRLR                       | 1 |
|                                                                                                                                                                                                                                                                             |      |       |      |      |   |   | 3 | SQAFIEMETREDAMAMVDHC[330]LKK                 | 1 |
| MCCC2_HUMAN (Q9HCC0) Methylcrotonoyl-CoA carboxylase beta chain, mitochondrial precursor (EC 6.4.1.4) (3-Methylcrotonyl-CoA carboxylase 2) (MCCase subunit beta) (3-methylcrotonyl-CoA:carbon dioxide ligase subunit beta) (3-Methylcrotonyl-CoA carboxylase n [MASS=61333] | 0.96 | 4.09  | 1.65 | 0.00 | 1 | 2 | 2 | GTHFVQLC[339]C[339]QR                        | 1 |
|                                                                                                                                                                                                                                                                             |      |       |      |      |   |   | 3 | QMKALVNQLHER                                 | 1 |
| MCE1_HUMAN (O60942) mRNA capping enzyme (HCE) (HCAP1) [Includes: Polynucleotide 5'-triphosphatase (EC 3.1.3.33) (mRNA 5'-triphosphatase) (TPase); mRNA guanylyltransferase (EC 2.7.7.50) (GTP--RNA guanylyltransferase) (GTase)] [MASS=68556]                               | 0.00 | 8.38  | 1.26 | 0.00 | 1 | 3 | 3 | C[339]TAASQGQKR                              | 1 |
|                                                                                                                                                                                                                                                                             |      |       |      |      |   |   | 3 | C[339]DDILKWKPPSLNSVDFR                      | 1 |
|                                                                                                                                                                                                                                                                             |      |       |      |      |   |   | 3 | YLIYDIIFNSQPVGDC[339]DFNVR                   | 1 |
| MDGA1_HUMAN (Q8NFP4) MAM domain-containing glycosylphosphatidylinositol anchor protein 1 precursor (MAM domain-containing protein 3) (GPI and MAM protein) (Glycosylphosphatidylinositol-MAM) (GPIM) [MASS=105790]                                                          | *    | 1.88  | *    | *    | * | 2 | 1 | RLLVTR                                       | 1 |
|                                                                                                                                                                                                                                                                             |      |       |      |      |   |   | 2 | PRPPVLWSRVDK                                 | 1 |

|                                                                                                                                                                |      |       |      |      |    |   |   |                                           |   |
|----------------------------------------------------------------------------------------------------------------------------------------------------------------|------|-------|------|------|----|---|---|-------------------------------------------|---|
| MDHC_HUMAN (P40925) Malate dehydrogenase, cytoplasmic (EC 1.1.1.37) (Cytosolic malate dehydrogenase) [MASS=36295]                                              | 0.86 | 2.10  | 0.57 | 0.02 | 2  | 1 | 2 | AIC[330]DHVR                              | 2 |
|                                                                                                                                                                |      |       |      |      |    |   | 3 | GYLGPEQLPDC[339]LKGC[339]DVVVIPAGVPR      | 1 |
|                                                                                                                                                                |      |       |      |      |    |   | 2 | TIIP LISQC[339]TPK                        | 1 |
|                                                                                                                                                                |      |       |      |      |    |   | 2 | EGVVEC[339]SFVK                           | 1 |
|                                                                                                                                                                |      |       |      |      |    |   | 2 | SQETEC[339]TYFSTPLLLGK                    | 1 |
| MDHM_HUMAN (P40926) Malate dehydrogenase, mitochondrial precursor (EC 1.1.1.37) [MASS=35531]                                                                   | 1.00 | 26.92 | 1.19 | 0.07 | 10 | 6 | 2 | GYLGPEQLPDC[339]LK                        | 1 |
|                                                                                                                                                                |      |       |      |      |    |   | 2 | GYLGPEQLPDC[330]LK                        | 1 |
|                                                                                                                                                                |      |       |      |      |    |   | 2 | TIIP LISQC[330]TPK                        | 1 |
|                                                                                                                                                                |      |       |      |      |    |   | 2 | GC[330]DVVVIPAGVPR                        | 1 |
|                                                                                                                                                                |      |       |      |      |    |   | 2 | GC[339]DVVVIPAGVPR                        | 2 |
| MEGF8_HUMAN (Q7Z7M0) Multiple epidermal growth factor-like domains 8 (EGF-like domain-containing protein 4) (Multiple EGF-like domain protein 4) [MASS=254572] | *    | 2.98  | *    | *    | *  | 4 | 2 | LDGGQLVWETLMDSR                           | 1 |
|                                                                                                                                                                |      |       |      |      |    |   | 3 | VSIVRSTTITLTPSAETDVSLVYR                  | 1 |
|                                                                                                                                                                |      |       |      |      |    |   | 2 | NC[330]STEC[330]RC[330]NRHSEC[330]AGVGAR  | 1 |
|                                                                                                                                                                |      |       |      |      |    |   | 3 | LLALTLPPDPC[339]R                         | 1 |
| MERL_HUMAN (P35240) Merlin (Moesin-ezrin-radixin-like protein) (Neurofibromin-2) (Schwannomin) (Schwannomerlin) [MASS=69690]                                   | 0.00 | 7.06  | 0.84 | 0.00 | 1  | 2 | 2 | IYC[330]PPEASVLLASYAVQAK                  | 1 |
|                                                                                                                                                                |      |       |      |      |    |   | 3 | QPKTFTVRIVTMDAEMEFNC[330]EM[147]K         | 1 |
| MFN2_HUMAN (O95140) Transmembrane GTPase MFN2 (EC 3.6.5.-) (Mitofusin-2) [MASS=86402]                                                                          | 0.00 | 6.74  | 0.71 | 0.00 | 1  | 2 | 3 | FEEC[339]ISQSAVKTKFEQHTVR                 | 1 |
|                                                                                                                                                                |      |       |      |      |    |   | 3 | TSNGKSTVINAM[147]LWDKVLPSGIGHTTNC[330]FLR | 1 |
| MGST3_HUMAN (O14880) Microsomal glutathione S-transferase 3 (EC 2.5.1.18) (Microsomal GST-3) (Microsomal GST-III) [MASS=16516]                                 | 1.00 | 15.79 | 1.28 | 0.01 | 2  | 1 | 2 | YKVEYPIM[147]YSTDPENGHIFNC[339]IQR        | 1 |
|                                                                                                                                                                |      |       |      |      |    |   | 3 | YKVEYPIMYSTDPENGHIFNC[339]IQR             | 1 |
| MICA2_HUMAN (O94851) Protein MICAL-2 [MASS=126688]                                                                                                             | *    | 1.78  | *    | *    | *  | 2 | 2 | LDKRGSHK                                  | 1 |
|                                                                                                                                                                |      |       |      |      |    |   | 2 | VDGQTGENDMNK                              | 1 |
| MIER1_HUMAN (Q8N108) Mesoderm induction early response protein 1 (Mi-er1) (hmi-er1) (Early response 1) (Er1) [MASS=60653]                                      | *    | 5.60  | *    | *    | *  | 1 | 3 | LLDESESAASSRAPSPPTASNSSNSQSEK             | 1 |

|                                                                                                                                                                                                                                                                              |                         |       |      |      |   |   |        |                                                          |        |
|------------------------------------------------------------------------------------------------------------------------------------------------------------------------------------------------------------------------------------------------------------------------------|-------------------------|-------|------|------|---|---|--------|----------------------------------------------------------|--------|
| MINK1_HUMAN (Q8N4C8) Misshapen-like kinase 1 (EC 2.7.11.1) (Mitogen-activated protein kinase kinase kinase kinase 6) (MAPK/ERK kinase kinase kinase 6) (MEK kinase kinase 6) (MEKKK 6) (Misshapen/NIK-related kinase) (GCK family kinase MINK) [MASS=149808]                 | 0.98                    | 0.90  | 0.29 | 0.00 | 1 | 1 | 2      | KFIDFIDTC[330]LIK                                        | 1      |
| MIOX_HUMAN (Q9UGB7) Inositol oxygenase (EC 1.13.99.1) (Myo-inositol oxygenase) (Aldehyde reductase-like 6) (Renal-specific oxidoreductase) (Kidney-specific protein 32) [MASS=33009]                                                                                         | 0.00                    | 6.32  | 0.00 | 0.00 | 1 | 1 | 3      | DYQQLC[330]SQQDLAMPLPWVR                                 | 1      |
| MK01_HUMAN (P28482) Mitogen-activated protein kinase 1 (EC 2.7.11.24) (Extracellular signal-regulated kinase 2) (ERK-2) (Mitogen-activated protein kinase 2) (MAP kinase 2) (MAPK 2) (p42-MAPK) (ERT1) [MASS=41258]                                                          | 1.00                    | 11.70 | 0.80 | 0.00 | 1 | 2 | 3<br>3 | HYLDQLNHILGILGSPSQEDLNC[330]IINLK<br>AAAAAAGAGPEM[147]VR | 1<br>1 |
| MKNK2_HUMAN (Q9HBH9) MAP kinase-interacting serine/threonine-protein kinase 2 (EC 2.7.11.1) (MAP kinase signal-integrating kinase 2) (Mnk2) [MASS=51875]                                                                                                                     | *                       | 6.45  | *    | *    | * | 1 | 3      | RHFNELEASVVVQDVASALDFLHNKGIAHR                           | 1      |
| MLL2_HUMAN (O14686) Myeloid/lymphoid or mixed-lineage leukemia protein 2 (ALL1-related protein) [MASS=564181]                                                                                                                                                                | *                       | 3.59  | *    | *    | * | 7 | 3      | PMQNNTGPQPPKPGPVLQSGQGLPGVGIMPTVGQLR                     | 1      |
|                                                                                                                                                                                                                                                                              |                         |       |      |      |   |   | 3      | LSPPEELPASPLPEALHLSR                                     | 1      |
|                                                                                                                                                                                                                                                                              |                         |       |      |      |   |   | 2      | FPTAPPTYPPYPSPTGAPAQPPMLGASSR                            | 1      |
|                                                                                                                                                                                                                                                                              |                         |       |      |      |   |   | 3      | HPSPC[339]QFTIATPKVEPAPAANSLGLGLK                        | 1      |
|                                                                                                                                                                                                                                                                              |                         |       |      |      |   |   | 3      | LAGLEQKLQGTPSNK                                          | 1      |
|                                                                                                                                                                                                                                                                              |                         |       |      |      |   |   | 3      | ADTPGPEGGVKASPVPSDPEKPGTPGEGM[147]LSSDLDR                | 1      |
| 3                                                                                                                                                                                                                                                                            | REANGEPIGAPGTSNHLLLAGPR | 1     |      |      |   |   |        |                                                          |        |
| MLP3A_HUMAN (Q9H492) Microtubule-associated proteins 1A/1B light chain 3A precursor (MAP1A/MAP1B LC3 A) (MAP1A/1B light chain 3 A) (MAP1 light chain 3-like protein 1) (Microtubule-associated protein 1 light chain 3 alpha) (Autophagy-related protein LC3 A) [MASS=14272] | *                       | 14.88 | *    | *    | * | 1 | 2      | DEDGFLYM[147]VYASQETFGF                                  | 1      |

|                                                                                                                                                                                                       |      |      |      |      |   |   |   |                                      |    |
|-------------------------------------------------------------------------------------------------------------------------------------------------------------------------------------------------------|------|------|------|------|---|---|---|--------------------------------------|----|
| MMP19_HUMAN (Q99542) Matrix metalloproteinase-19 precursor (EC 3.4.24.-) (MMP-19) (Matrix metalloproteinase RASI) (MMP-18) [MASS=57357]                                                               | 0.00 | 5.71 | 3.51 | 0.00 | 1 | 2 | 2 | M[147]NC[339]QQLWLGFLLPMTVSGR        | 1  |
|                                                                                                                                                                                                       |      |      |      |      |   |   | 3 | NISHNWMHC[339]R                      | 1  |
|                                                                                                                                                                                                       |      |      |      |      |   |   | 1 | TFPGIPK                              | 11 |
| MMP3_HUMAN (P08254) Stromelysin-1 precursor (EC 3.4.24.17) (Matrix metalloproteinase-3) (MMP-3) (Transin-1) (SL-1) [MASS=53977]                                                                       | 0.00 | 4.19 | *    | *    | * | 2 |   |                                      |    |
|                                                                                                                                                                                                       |      |      |      |      |   |   | 3 | GNQFWAIRGNEVR                        | 1  |
| MMP8_HUMAN (P22894) Neutrophil collagenase precursor (EC 3.4.24.34) (Matrix metalloproteinase-8) (MMP-8) (PMNL collagenase) (PMNL-CL) [MASS=53412]                                                    | 0.00 | 3.64 | 0.44 | 0.00 | 1 | 1 | 2 | C[330]GVPDSGGFMLTPGNPK               | 1  |
| MMSA_HUMAN (Q02252) Methylmalonate-semialdehyde dehydrogenase [acylating], mitochondrial precursor (EC 1.2.1.27) (MMSDH) (Malonate-semialdehyde dehydrogenase [acylating]) (EC 1.2.1.18) [MASS=57839] | *    | 4.86 | *    | *    | * | 1 | 2 | VKGYENGNFVGPTIISNVKPNM[147]TC[330]YK | 1  |
| MOD5_HUMAN (Q9H3H1) tRNA isopentenyltransferase, mitochondrial precursor (EC 2.5.1.8) (Isopentenyl-diphosphate:tRNA isopentenyltransferase) (IPP transferase) (IPTase) (IPPT) (hGRO1) [MASS=52725]    | 0.00 | 8.78 | 0.69 | 0.00 | 1 | 2 | 3 | EFHEYLITEGKC[339]TLETSNQLLKK         | 1  |
|                                                                                                                                                                                                       |      |      |      |      |   |   | 2 | VDDMLAAGLLEELRDFHR                   | 1  |
| MOG_HUMAN (Q16653) Myelin-oligodendrocyte glycoprotein precursor [MASS=28179]                                                                                                                         | *    | 8.91 | *    | *    | * | 1 | 3 | NATGMEVGWYRPPFSRVVHLYR               | 1  |
| MORC3_HUMAN (Q14149) MORC family CW-type zinc finger 3 (Zinc finger CW-type coiled-coil domain protein 3) [MASS=107112]                                                                               | *    | 2.56 | *    | *    | * | 1 | 3 | KLPDGMDQLPEKWYC[339]SNNPDPQFR        | 1  |

|                                                                                                                                                                                                                                                                               |      |       |      |      |   |   |   |                                           |   |
|-------------------------------------------------------------------------------------------------------------------------------------------------------------------------------------------------------------------------------------------------------------------------------|------|-------|------|------|---|---|---|-------------------------------------------|---|
| MORC4_HUMAN (Q8TE76) MORC family CW-type zinc finger 4 (Zinc finger CW-type coiled-coil domain protein 2) [MASS=106347]                                                                                                                                                       | *    | 3.74  | *    | *    | * | 2 | 3 | KM[147]PMENENHQVFSNPPK                    | 1 |
|                                                                                                                                                                                                                                                                               |      |       |      |      |   |   | 3 | DQRQGSLLP EELEDQMPR                       | 1 |
| MPCP_HUMAN (Q00325) Phosphate carrier protein, mitochondrial precursor (PTP) (Solute carrier family 25 member 3) [MASS=40095]                                                                                                                                                 | 0.97 | 1.66  | 1.14 | 0.00 | 1 | 1 | 2 | FAC[330]FER                               | 1 |
| MPPA_HUMAN (Q10713) Mitochondrial-processing peptidase alpha subunit, mitochondrial precursor (EC 3.4.24.64) (Alpha-MPP) (P-55) [MASS=58253]                                                                                                                                  | *    | 4.76  | *    | *    | * | 1 | 2 | AKTQLTSMLMMNLESRPVIFEDVGR                 | 1 |
| MPRI_HUMAN (P11717) Cation-independent mannose-6-phosphate receptor precursor (CI Man-6-P receptor) (CI-MPR) (M6PR) (Insulin-like growth factor 2 receptor) (Insulin-like growth factor II receptor) (IGF-II receptor) (M6P/IGF2 receptor) (M6P/IGF2R) (300 kD) [MASS=274274] | 0.00 | 2.61  | 1.23 | 0.00 | 1 | 3 | 3 | IFMFNVC[330]GTMPVC[330]GTILGK             | 1 |
|                                                                                                                                                                                                                                                                               |      |       |      |      |   |   | 3 | EYLFYLNVC[339]GETEIQFC[339]NKK            | 1 |
|                                                                                                                                                                                                                                                                               |      |       |      |      |   |   | 3 | GLVYMSIC[330]GENENC[339]PPGVGAC[339]FGQTR | 1 |
| MRC2_HUMAN (Q9UBG0) Macrophage mannose receptor 2 precursor (Urokinase receptor-associated protein) (Endocytic receptor 180) (CD280 antigen) [MASS=166654]                                                                                                                    | 0.00 | 1.35  | 1.55 | 0.00 | 1 | 1 | 2 | ISYHGSC[339]PQGLADSAWIPFR                 | 1 |
| MSAP_HUMAN (Q9Y2B0) MIR-interacting saposin-like protein precursor (Transmembrane protein 4) (Putative secreted protein ZSIG9) [MASS=20652]                                                                                                                                   | *    | 5.49  | *    | *    | * | 1 | 2 | IDSDISGTLK                                | 1 |
| MTCH1_HUMAN (Q9NZJ7) Mitochondrial carrier homolog 1 (Presenilin-associated protein) [MASS=41544]                                                                                                                                                                             | 0.00 | 10.03 | *    | *    | * | 1 | 3 | MDGGSGGLGSGDNAPTTEALFVALGAGVTALSHPLLYVK   | 1 |
| MTCH2_HUMAN (Q9Y6C9) Mitochondrial carrier homolog 2 (Met-induced mitochondrial protein) [MASS=33331]                                                                                                                                                                         | 1.00 | 11.22 | 1.25 | 0.07 | 3 | 2 | 3 | QVC[339]QLPGLFSYAQHIASIDGR                | 1 |
|                                                                                                                                                                                                                                                                               |      |       |      |      |   |   | 2 | LC[339]SGVLGTVVHGK                        | 1 |
|                                                                                                                                                                                                                                                                               |      |       |      |      |   |   | 2 | QVC[330]QLPGLFSYAQHIASIDGR                | 1 |
| MTMR6_HUMAN (Q9Y217) Myotubularin-related protein 6 (EC 3.1.3.-) [MASS=71953]                                                                                                                                                                                                 | *    | 3.06  | *    | *    | * | 1 | 2 | ERDC[339]HDIYNSLLQLSKQAK                  | 1 |
| MTMRD_HUMAN (Q86WG5) Myotubularin-related protein 13 (SET-binding factor 2) [MASS=208463]                                                                                                                                                                                     | *    | 2.54  | *    | *    | * | 2 | 3 | KC[330]VVPAGPPVVSIM[147]DKVTTVFNSAQR      | 1 |
|                                                                                                                                                                                                                                                                               |      |       |      |      |   |   | 2 | SQRHLRSRSPGIVSTNLPSYQK                    | 1 |

|                                                                                                                                                                                                                             |      |      |      |      |   |   |   |                                          |   |
|-----------------------------------------------------------------------------------------------------------------------------------------------------------------------------------------------------------------------------|------|------|------|------|---|---|---|------------------------------------------|---|
| MX2_HUMAN (P20592) Interferon-induced GTP-binding protein Mx2 (Interferon-regulated resistance GTP-binding protein MxB) (p78-related protein) [MASS=82088]                                                                  | *    | 1.54 | *    | *    | * | 1 | 2 | GTEKSVM[147]NVVR                         | 1 |
| MY18B_HUMAN (Q8IUG5) Myosin-18B (Myosin XVIIIb) [MASS=285183]                                                                                                                                                               | *    | 0.70 | *    | *    | * | 1 | 2 | TPC[339]GSQASTEILAPKAEK                  | 1 |
| MYCN_HUMAN (P04198) N-myc proto-oncogene protein [MASS=49561]                                                                                                                                                               | *    | 3.88 | *    | *    | * | 1 | 2 | SSFLTLRDHVPPELVKNEK                      | 1 |
| MYH9_HUMAN (P35579) Myosin-9 (Myosin heavy chain, nonmuscle IIa) (Nonmuscle myosin heavy chain IIa) (NMMHC II-a) (NMMHC-IIA) (Cellular myosin heavy chain, type A) (Nonmuscle myosin heavy chain-A) (NMMHC-A) [MASS=226400] | *    | 3.37 | *    | *    | * | 3 | 2 | SM[147]EAEMIQLQEELAAAER                  | 1 |
|                                                                                                                                                                                                                             |      |      |      |      |   |   | 2 | YEILTPNSIPKGF[M147]DGKQAC[339]VLM[147]IK | 1 |
|                                                                                                                                                                                                                             |      |      |      |      |   |   | 2 | IIGLDQVAGMSETALPGAFKTRK                  | 1 |
| MYO5A_HUMAN (Q9Y411) Myosin-5A (Myosin Va) (Dilute myosin heavy chain, non-muscle) (Myosin heavy chain 12) (Myoxin) [MASS=215420]                                                                                           | *    | 1.94 | *    | *    | * | 2 | 3 | VVFQAEERNYHIFYQLC[330]ASAK               | 1 |
|                                                                                                                                                                                                                             |      |      |      |      |   |   | 3 | KVPLDMSLFLKLQK                           | 1 |
| MYO7A_HUMAN (Q13402) Myosin-7A (Myosin VIIa) [MASS=254404]                                                                                                                                                                  | 0.00 | 5.15 | 0.74 | 0.00 | 1 | 6 | 3 | FGKYIDIHFNR                              | 1 |
|                                                                                                                                                                                                                             |      |      |      |      |   |   | 2 | VSSLGSGSDHVM[147]DAISQC[339]EQYAK        | 1 |
|                                                                                                                                                                                                                             |      |      |      |      |   |   | 2 | VYFPDDTDEAFEVESSTK                       | 1 |
|                                                                                                                                                                                                                             |      |      |      |      |   |   | 3 | NFIHGGPPGYAPYC[330]EERLR                 | 1 |
|                                                                                                                                                                                                                             |      |      |      |      |   |   | 2 | NYHVFC[330]MLEGMSDQKK                    | 1 |
|                                                                                                                                                                                                                             |      |      |      |      |   |   | 2 | GTDTTMLHKLNSQHKLNANYIPPK                 | 1 |
|                                                                                                                                                                                                                             |      |      |      |      |   |   | 2 | VALLEDVNR                                | 2 |
| MYO9B_HUMAN (Q13459) Myosin-9B (Myosin IXb) (Unconventional myosin-9b) [MASS=243556]                                                                                                                                        | *    | 2.69 | *    | *    | * | 4 | 2 | DVLKITTC[339]VEMLIKEQMR                  | 1 |
|                                                                                                                                                                                                                             |      |      |      |      |   |   | 3 | YTGMLETVRIR                              | 4 |
|                                                                                                                                                                                                                             |      |      |      |      |   |   | 3 | QPTEQPQAMAVGKVSEETEK                     | 1 |
| MYOTI_HUMAN (Q9UBF9) Myotilin (Titin immunoglobulin domain protein) (Myofibrillar titin-like Ig domains protein) (57 kDa cytoskeletal protein) [MASS=55395]                                                                 | *    | 3.01 | *    | *    | * | 1 | 2 | QSSIIQPRQC[339]TEQR                      | 1 |
| MYPN_HUMAN (Q86TC9) Myopalladin (145 kDa sarcomeric protein) [MASS=145256]                                                                                                                                                  | *    | 0.61 | *    | *    | * | 1 | 1 | SSSRIGLR                                 | 1 |

|                                                                                                                                                                                                                                                                              |      |       |      |      |   |   |   |   |                                                                    |             |
|------------------------------------------------------------------------------------------------------------------------------------------------------------------------------------------------------------------------------------------------------------------------------|------|-------|------|------|---|---|---|---|--------------------------------------------------------------------|-------------|
|                                                                                                                                                                                                                                                                              |      |       |      |      |   |   |   | 2 | VC[339]GSNLLSIC[339]K                                              | 2           |
|                                                                                                                                                                                                                                                                              |      |       |      |      |   |   |   | 3 | M[147]YGVLPWNAFPGK                                                 | 1           |
|                                                                                                                                                                                                                                                                              |      |       |      |      |   |   |   | 2 | VC[330]GSNLLSIC[330]K                                              | 2           |
| MYPR_HUMAN (P60201) Myelin proteolipid protein (PLP) (Lipophilin) [MASS=29946]                                                                                                                                                                                               | 1.00 | 18.12 | 1.48 | 0.10 | 8 | 5 |   |   |                                                                    |             |
|                                                                                                                                                                                                                                                                              |      |       |      |      |   |   |   | 2 | VC[339]HC[339]LGK                                                  | 1           |
|                                                                                                                                                                                                                                                                              |      |       |      |      |   |   |   | 2 | TTIC[339]GK                                                        | 1           |
|                                                                                                                                                                                                                                                                              |      |       |      |      |   |   |   | 2 | TSASIGSLC[339]ADAR                                                 | 2           |
| MYST4_HUMAN (Q8WYB5) Histone acetyltransferase MYST4 (EC 2.3.1.48) (EC 2.3.1.-) (MYST protein 4) (MOZ, YBF2/SAS3, SAS2 and TIP60 protein 4) (Histone acetyltransferase MOZ2) (Monocytic leukemia zinc finger protein-related factor) (Histone acetyltransferas [MASS=231343] | *    | 0.34  | *    | *    | * | 1 | 1 |   | ERKTGFK                                                            | 1           |
| N4BM_HUMAN (O95298) NADH-ubiquinone oxidoreductase subunit B14.5b (EC 1.6.5.3) (EC 1.6.99.3) (Complex I-B14.5b) (CI-B14.5b) [MASS=14187]                                                                                                                                     | *    | 5.88  | *    | *    | * | 1 | 2 |   | EM[147]FGYMK                                                       | 1           |
| NAC2_HUMAN (Q9UPR5) Sodium/calcium exchanger 2 precursor (Na <sup>+</sup> )/Ca <sup>2+</sup> -exchange protein 2) [MASS=100367]                                                                                                                                              | *    | 4.02  | *    | *    | * | 2 | 2 | 2 | LEVIIIESYDFKNTVDKLIK<br>EITITKANGETSVGTVR                          | 1<br>1      |
| NADE1_HUMAN (Q6IA69) Glutamine-dependent NAD(+) synthetase (EC 6.3.5.1) (NAD(+) synthase [glutamine-hydrolyzing]) (NAD(+) synthetase 1) [MASS=79293]                                                                                                                         | *    | 1.84  | *    | *    | * | 1 | 2 |   | M[147]ALANEGNYRELR                                                 | 1           |
| NAL14_HUMAN (Q86W24) NACHT, LRR and PYD-containing protein 14 (Nucleotide-binding oligomerization domain protein 5) [MASS=124732]                                                                                                                                            | 0.00 | 2.20  | 0.31 | 0.00 | 1 | 2 | 2 | 2 | SAM[147]NILHHELHPNC[330]K<br>YVFYLNGR                              | 1<br>1      |
| NALP6_HUMAN (P59044) NACHT, LRR and PYD-containing protein 6 (PYRIN-containing APAF1-like protein 5) [MASS=98733]                                                                                                                                                            | 0.00 | 5.94  | *    | *    | * | 2 | 3 | 3 | ADAVDLAEQLAQFYGPEPALEVARK<br>DLSEALRAAPALTELGLLHNRLSEAGLR          | 1<br>1      |
| NBEAL_HUMAN (Q6ZS30) Neurobeachin-like 1 (Amyotrophic lateral sclerosis 2 chromosomal region candidate gene 17 protein) [MASS=150732]                                                                                                                                        | *    | 3.81  | *    | *    | * | 3 |   | 2 | ERKALEGMINNFQTPC[330]QLLK<br>NALHLFSINGK<br>ALEGMINNFQTPC[339]QLLK | 1<br>1<br>1 |



|                                                                                                                                                                                                                                                           |                 |       |      |      |   |   |   |                                        |   |
|-----------------------------------------------------------------------------------------------------------------------------------------------------------------------------------------------------------------------------------------------------------|-----------------|-------|------|------|---|---|---|----------------------------------------|---|
| NCA11_HUMAN (P13591) Neural cell adhesion molecule 1, 140 kDa isoform precursor (N-CAM 140) (NCAM-140) (CD56 antigen) [MASS=93360]                                                                                                                        | 1.00            | 5.90  | 0.33 | 0.23 | 4 | 3 | 2 | FFLC[330]QVAGDAK                       | 1 |
|                                                                                                                                                                                                                                                           |                 |       |      |      |   |   | 3 | GPVEAKPEC[330]QETETKPAPAEVK            | 1 |
|                                                                                                                                                                                                                                                           |                 |       |      |      |   |   | 1 | FFLC[330]QVAGDAK                       | 1 |
|                                                                                                                                                                                                                                                           |                 |       |      |      |   |   | 2 | KVDKNDEAEYIC[339]IAENK                 | 1 |
| NCALD_HUMAN (P61601) Neurocalcin delta [MASS=22114]                                                                                                                                                                                                       | 0.00            | 21.88 | 1.46 | 0.00 | 1 | 2 | 3 | AEMLEIVQAIYKMVSSVMKMPPEDESTPEK         | 1 |
|                                                                                                                                                                                                                                                           |                 |       |      |      |   |   | 2 | DC[339]PSGHLSMEEFK                     | 1 |
| NDRG1_HUMAN (Q92597) Protein NDRG1 (N-myc downstream-regulated gene 1 protein) (Differentiation-related gene 1 protein) (DRG-1) (Reducing agents and tunicamycin-responsive protein) (RTP) (Nickel-specific induction protein Cap43) (Rit42) [MASS=42835] | *               | 15.48 | *    | *    | * | 3 | 3 | TTLLKM[147]ADC[339]GGLPQISQPAK         | 1 |
|                                                                                                                                                                                                                                                           |                 |       |      |      |   |   | 2 | YFVQGMGYM[147]PSASM[147]TR             | 1 |
|                                                                                                                                                                                                                                                           |                 |       |      |      |   |   | 3 | LAEAFKYFVQGMGYMPSASMTRLM[147]R         | 1 |
| NDRG2_HUMAN (Q9UN36) Protein NDRG2 (Protein Syld709613) [MASS=40798]                                                                                                                                                                                      | 0.84            | 11.32 | 0.67 | 0.00 | 1 | 2 | 2 | YFLQGM[147]GYMASSC[330]MTRLSR          | 1 |
|                                                                                                                                                                                                                                                           |                 |       |      |      |   |   | 3 | C[330]PVM[147]LVVGDQAPHEDAVVEC[330]NSK | 1 |
| NDUA2_HUMAN (O43678) NADH dehydrogenase [ubiquinone] 1 alpha subcomplex subunit 2 (EC 1.6.5.3) (EC 1.6.99.3) (NADH-ubiquinone oxidoreductase B8 subunit) (Complex I-B8) (CI-B8) [MASS=10790]                                                              | 1.00            | 6.12  | 1.28 | 0.00 | 2 | 1 | 2 | IHLC[339]QR                            | 1 |
|                                                                                                                                                                                                                                                           |                 |       |      |      |   |   | 2 | IHLC[330]QR                            | 1 |
| NDUA5_HUMAN (Q16718) NADH dehydrogenase [ubiquinone] 1 alpha subcomplex subunit 5 (EC 1.6.5.3) (EC 1.6.99.3) (NADH-ubiquinone oxidoreductase 13 kDa-B subunit) (Complex I-13Kd-B) (CI-13Kd-B) (Complex I subunit B13) [MASS=13327]                        | 0.99            | 13.91 | 1.75 | 0.11 | 2 | 1 | 2 | TTGLVGLAVC[339]NTPHER                  | 2 |
|                                                                                                                                                                                                                                                           |                 |       |      |      |   |   |   |                                        |   |
| NDUA8_HUMAN (P51970) NADH dehydrogenase [ubiquinone] 1 alpha subcomplex subunit 8 (EC 1.6.5.3) (EC 1.6.99.3) (NADH-ubiquinone oxidoreductase 19 kDa subunit) (Complex I-19KD) (CI-19KD) (Complex I-PGIV) (CI-PGIV) [MASS=19974]                           | *               | 8.77  | *    | *    | * | 1 | 2 | VKTDRPLPENPYHSR                        | 1 |
|                                                                                                                                                                                                                                                           |                 |       |      |      |   |   |   |                                        |   |
| NDUAA_HUMAN (O95299) NADH dehydrogenase [ubiquinone] 1 alpha subcomplex subunit 10, mitochondrial precursor (EC 1.6.5.3) (EC 1.6.99.3) (NADH-ubiquinone oxidoreductase 42 kDa subunit) (Complex I-42KD) (CI-42KD) [MASS=40750]                            | 1.00            | 19.15 | 1.27 | 0.04 | 5 | 4 | 2 | QC[339]VDHYNEVK                        | 1 |
|                                                                                                                                                                                                                                                           |                 |       |      |      |   |   | 2 | KQC[339]VDHYNEVK                       | 1 |
|                                                                                                                                                                                                                                                           |                 |       |      |      |   |   | 2 | ITSAYLQDIENAYKK                        | 1 |
|                                                                                                                                                                                                                                                           |                 |       |      |      |   |   | 3 | HFPEAGIHYPDSTTGDGKPLATDYNGNC[339]SLEK  | 1 |
|                                                                                                                                                                                                                                                           |                 |       |      |      |   |   | 2 | KQC[330]VDHYNEVK                       | 1 |
| 2                                                                                                                                                                                                                                                         | QC[330]VDHYNEVK | 1     |      |      |   |   |   |                                        |   |

|                                                                                                                                                                                                                             |      |      |      |      |   |   |   |                                |   |
|-----------------------------------------------------------------------------------------------------------------------------------------------------------------------------------------------------------------------------|------|------|------|------|---|---|---|--------------------------------|---|
| NDUB7_HUMAN (P17568) NADH dehydrogenase [ubiquinone] 1 beta subcomplex subunit 7 (EC 1.6.5.3) (EC 1.6.99.3) (NADH-ubiquinone oxidoreductase B18 subunit) (Complex I-B18) (CI-B18) (Cell adhesion protein SQM1) [MASS=16271] | 1.00 | 6.62 | 0.94 | 0.02 | 4 | 1 | 2 | DYC[330]AHLIR                  | 1 |
|                                                                                                                                                                                                                             |      |      |      |      |   |   | 3 | DYC[330]AHLIR                  | 1 |
|                                                                                                                                                                                                                             |      |      |      |      |   |   | 3 | DYC[339]AHLIR                  | 1 |
|                                                                                                                                                                                                                             |      |      |      |      |   |   | 2 | DYC[339]AHLIR                  | 1 |
|                                                                                                                                                                                                                             |      |      |      |      |   |   | 2 | SLQDDPKLVLSMNVAK               | 5 |
| NEBU_HUMAN (P20929) Nebulin [MASS=773208]                                                                                                                                                                                   | 0.00 | 1.71 | *    | *    | * | 8 | 2 | HFKYATQLM[147]NEK              | 1 |
|                                                                                                                                                                                                                             |      |      |      |      |   |   | 2 | NQEMMSQIKYK                    | 1 |
|                                                                                                                                                                                                                             |      |      |      |      |   |   | 2 | VNKQISDILYKLEYNK               | 1 |
|                                                                                                                                                                                                                             |      |      |      |      |   |   | 2 | GKMVGFQSLQDDPK                 | 1 |
|                                                                                                                                                                                                                             |      |      |      |      |   |   | 1 | M[147]VGFR                     | 1 |
|                                                                                                                                                                                                                             |      |      |      |      |   |   | 3 | NMMQIQSDNQYKADYADFM[147]K      | 1 |
|                                                                                                                                                                                                                             |      |      |      |      |   |   | 3 | FM[147]TPYIAHSQKMQLFSPNK       | 1 |
| NEK4_HUMAN (P51957) Serine/threonine-protein kinase Nek4 (EC 2.7.11.1) (NimA-related protein kinase 4) (Serine/threonine-protein kinase 2) (Serine/threonine-protein kinase NRK2) [MASS=94571]                              | *    | 2.97 | *    | *    | * | 2 | 3 | TNIIKVGDLGIAR                  | 1 |
|                                                                                                                                                                                                                             |      |      |      |      |   |   | 3 | PEERPSVRSILR                   | 1 |
|                                                                                                                                                                                                                             |      |      |      |      |   |   |   |                                |   |
| NF1_HUMAN (P21359) Neurofibromin (Neurofibromatosis-related protein NF-1) [Contains: Neurofibromin truncated] [MASS=319370]                                                                                                 | *    | 1.41 | *    | *    | * | 3 | 3 | LVSSKVI GRM[147]C[330]K        | 1 |
|                                                                                                                                                                                                                             |      |      |      |      |   |   | 3 | LFDLVDGFAESTK                  | 1 |
|                                                                                                                                                                                                                             |      |      |      |      |   |   | 3 | FM[147]DRLLSLM[147]VC[330]NHEK | 1 |
| NF2L2_HUMAN (Q16236) Nuclear factor erythroid 2-related factor 2 (NF-E2-related factor 2) (NFE2-related factor 2) (Nuclear factor, erythroid derived 2, like 2) (HEBP1) [MASS=67826]                                        | 0.00 | 1.49 | *    | *    | * | 1 | 2 | DGNVFLVPK                      | 1 |
|                                                                                                                                                                                                                             |      |      |      |      |   |   |   |                                |   |
| NFASC_HUMAN (O94856) Neurofascin precursor [MASS=150026]                                                                                                                                                                    | 0.99 | 4.60 | 0.57 | 0.00 | 1 | 4 | 2 | RGTTVQLE C[330]R               | 1 |
|                                                                                                                                                                                                                             |      |      |      |      |   |   | 1 | FGTALS NR                      | 1 |
|                                                                                                                                                                                                                             |      |      |      |      |   |   | 2 | NGQGSNLDGGNYHVYENG SLEIK       | 1 |
|                                                                                                                                                                                                                             |      |      |      |      |   |   | 2 | AYLTVLADQATPTNRLAALPK          | 1 |
| NFIB_HUMAN (O00712) Nuclear factor 1 B-type (Nuclear factor 1/B) (NF1-B) (NFI-B) (NF-1/B) (CCAAT-box-binding transcription factor) (CTF) (TGGCA-binding protein) [MASS=47442]                                               | 0.22 | 3.33 | 1.93 | 0.00 | 1 | 1 | 2 | HPC[339]C[339]VLSNPDQKGK       | 1 |

|                                                                                                                                                                                                                      |      |       |      |      |   |   |   |                                        |   |
|----------------------------------------------------------------------------------------------------------------------------------------------------------------------------------------------------------------------|------|-------|------|------|---|---|---|----------------------------------------|---|
| NHPX_HUMAN (P55769) NHP2-like protein 1 (High mobility group-like nuclear protein 2 homolog 1) (U4/U6.U5 tri-snRNP 15.5 kDa protein) (OTK27) (hSNU13) [MASS=14042]                                                   | 0.34 | 22.05 | 0.73 | 0.00 | 1 | 1 | 3 | GISEFIVM[147]AADAEPLEIILHLPLLC[330]EDK | 1 |
| NIFUN_HUMAN (Q9H1K1) NifU-like N-terminal domain-containing protein, mitochondrial precursor (NifU-like protein) (Iron-sulfur cluster assembly enzyme ISCU) [MASS=17937]                                             | 0.00 | 16.17 | 1.09 | 0.00 | 1 | 1 | 3 | NVGS�DKTSKNVGTGLVGAPAC[339]GDVM[147]K  | 1 |
| NIPM_HUMAN (O43920) NADH-ubiquinone oxidoreductase 15 kDa subunit (EC 1.6.5.3) (EC 1.6.99.3) (Complex I-15 kDa) (CI-15 kDa) [MASS=12386]                                                                             | *    | 33.33 | *    | *    | * | 2 | 2 | WLTIQSGEQPYK                           | 1 |
|                                                                                                                                                                                                                      |      |       |      |      |   |   | 3 | M[147]AGRC[330]HAFEKEWIEC[330]AHGIGYTR | 1 |
| NIPS1_HUMAN (Q9BPW8) Protein NipSnap1 [MASS=33310]                                                                                                                                                                   | *    | 4.93  | *    | *    | * | 1 | 2 | FSGGYPALMDC[330]M[147]NK               | 1 |
| NIPS2_HUMAN (O75323) Protein NipSnap2 (Glioblastoma amplified sequence) [MASS=33742]                                                                                                                                 | 1.00 | 8.39  | 1.08 | 0.11 | 2 | 2 | 2 | IC[339]QEVLPK                          | 1 |
|                                                                                                                                                                                                                      |      |       |      |      |   |   | 2 | LQFHNVKPEC[339]LEAYNK                  | 1 |
| NKRF_HUMAN (O15226) NF-kappa-B-repressing factor (NFKB-repressing factor) (Transcription factor NRF) (ITBA4 protein) [MASS=77672]                                                                                    | *    | 2.46  | *    | *    | * | 1 | 3 | NEIQGRSAEEAYKQQIK                      | 1 |
|                                                                                                                                                                                                                      |      |       |      |      |   |   | 2 | LRAYRPPSGEK                            | 1 |
| NKTR_HUMAN (P30414) NK-tumor recognition protein (Natural-killer cells cyclophilin-related protein) (NK-TR protein) [MASS=165675]                                                                                    | 0.00 | 5.61  | 1.21 | 0.00 | 1 | 5 | 2 | YVKGRDR                                | 1 |
|                                                                                                                                                                                                                      |      |       |      |      |   |   | 2 | EPVGRIMFQLFSDIC[330]PK                 | 1 |
|                                                                                                                                                                                                                      |      |       |      |      |   |   | 3 | KQAFHWQPPLEFGEEEEIEIDDKQVTQESK         | 1 |
|                                                                                                                                                                                                                      |      |       |      |      |   |   | 2 | EASSSEEP RNKHAM[147]NPK                | 1 |
| NLGN1_HUMAN (Q8N2Q7) Neuroligin-1 precursor [MASS=93835]                                                                                                                                                             | *    | 2.74  | *    | *    | * | 1 | 3 | MLATKVGCC[330]NVSDTVELVEC[330]LQKK     | 1 |
| NLTP_HUMAN (P22307) Nonspecific lipid-transfer protein (EC 2.3.1.176) (Propanoyl-CoA C-acyltransferase) (NSL-TP) (Sterol carrier protein 2) (SCP-2) (Sterol carrier protein X) (SCP-X) (SCP-chi) (SCPX) [MASS=58993] | 0.00 | 9.14  | 0.53 | 0.00 | 1 | 3 | 2 | IGGIFAFKVKDGP GGK                      | 1 |
|                                                                                                                                                                                                                      |      |       |      |      |   |   | 2 | KADC[339]TITM[147]ADSDFLALM[147]TGK    | 1 |
|                                                                                                                                                                                                                      |      |       |      |      |   |   | 3 | RVFVVGVMGTMKFKV                        | 1 |

|                                                                                                                                                                                      |      |       |      |      |   |   |   |                                              |   |
|--------------------------------------------------------------------------------------------------------------------------------------------------------------------------------------|------|-------|------|------|---|---|---|----------------------------------------------|---|
| NNTM_HUMAN (Q13423) NAD(P) transhydrogenase, mitochondrial precursor (EC 1.6.1.2) (Pyridine nucleotide transhydrogenase) (Nicotinamide nucleotide transhydrogenase) [MASS=113895]    | 1.00 | 4.33  | 0.89 | 0.08 | 4 | 4 | 2 | LFAQQC[339]K                                 | 1 |
|                                                                                                                                                                                      |      |       |      |      |   |   | 2 | PGIPYKQLTVGVPK                               | 2 |
|                                                                                                                                                                                      |      |       |      |      |   |   | 2 | KTC[339]DALQAK                               | 1 |
|                                                                                                                                                                                      |      |       |      |      |   |   | 1 | LFAQQC[330]K                                 | 2 |
|                                                                                                                                                                                      |      |       |      |      |   |   | 2 | EANSIIITPGYGLC[330]AAK                       | 1 |
|                                                                                                                                                                                      |      |       |      |      |   |   | 2 | KTC[330]DALQAK                               | 1 |
| NOP14_HUMAN (P78316) Probable nucleolar complex protein 14 [MASS=97668]                                                                                                              | 0.00 | 1.28  | 0.40 | 0.00 | 1 | 1 | 2 | C[330]NHPSLAEGNK                             | 1 |
| NOP5_HUMAN (Q9Y2X3) Nucleolar protein NOP5 (Nucleolar protein 5) (NOP58) [MASS=59578]                                                                                                | *    | 3.21  | *    | *    | * | 1 | 2 | EM[147]AAM[147]C[330]LGLAHSLSRYR             | 1 |
| NOS1_HUMAN (P29475) Nitric-oxide synthase, brain (EC 1.14.13.39) (NOS type I) (Neuronal NOS) (N-NOS) (nNOS) (Constitutive NOS) (NC-NOS) (bNOS) [MASS=160969]                         | 0.00 | 5.86  | 0.29 | 0.00 | 1 | 4 | 2 | FGC[330]ALM[147]EMRHPNSVQEERK                | 1 |
|                                                                                                                                                                                      |      |       |      |      |   |   | 2 | QFDIQHKGM[147]NPC[339]PM[147]VLVFGC[339]RQSK | 1 |
|                                                                                                                                                                                      |      |       |      |      |   |   | 2 | SQAYAKTLC[330]EIFKHAFDAK                     | 1 |
|                                                                                                                                                                                      |      |       |      |      |   |   | 3 | M[147]EDHMFVGVQQIQPNVISVRLFK                 | 1 |
| NOTC4_HUMAN (Q99466) Neurogenic locus notch homolog protein 4 precursor (Notch 4) (hNotch4) [Contains: Notch 4 extracellular truncation; Notch 4 intracellular domain] [MASS=209621] | 0.00 | 4.69  | 1.58 | 0.00 | 1 | 4 | 3 | GSPQLDC[339]GPPALQEM[147]PINQGGEK            | 1 |
|                                                                                                                                                                                      |      |       |      |      |   |   | 3 | GGGAC[339]LQARTWSVDLAARGGGAYSHC[330]R        | 1 |
|                                                                                                                                                                                      |      |       |      |      |   |   | 3 | DQAGLAPADVAHQRNHWDLTLLEGAGPPEAR              | 1 |
|                                                                                                                                                                                      |      |       |      |      |   |   | 3 | C[339]SC[330]PHSSPGPR                        | 7 |
| NP1L4_HUMAN (Q99733) Nucleosome assembly protein 1-like 4 (Nucleosome assembly protein 2) (NAP2) [MASS=42823]                                                                        | 0.25 | 11.47 | 0.73 | 0.00 | 1 | 3 | 3 | ASGDGESLDEDESEFTLASDFEIGHFFRER               | 1 |
|                                                                                                                                                                                      |      |       |      |      |   |   | 2 | C[330]AHIEAK                                 | 1 |
|                                                                                                                                                                                      |      |       |      |      |   |   | 2 | RRINALK                                      | 1 |
| NPC1_HUMAN (O15118) Niemann-Pick C1 protein precursor [MASS=142166]                                                                                                                  | 0.00 | 1.10  | 2.47 | 0.00 | 1 | 1 | 2 | YNC[339]EYSGPPKPLPK                          | 1 |
| NPTN_HUMAN (Q9Y639) Neuroplastin precursor (Stromal cell-derived receptor 1) (SDR-1) [MASS=31291]                                                                                    | 1.00 | 6.38  | 0.46 | 0.09 | 5 | 1 | 2 | AEDSGEYHC[339]VYHFVSAPK                      | 1 |
|                                                                                                                                                                                      |      |       |      |      |   |   | 2 | AEDSGEYHC[330]VYHFVSAPK                      | 3 |
|                                                                                                                                                                                      |      |       |      |      |   |   | 3 | AEDSGEYHC[330]VYHFVSAPK                      | 1 |

|                                                                                                                                                                                                                                    |             |       |      |      |   |   |   |                                                    |   |
|------------------------------------------------------------------------------------------------------------------------------------------------------------------------------------------------------------------------------------|-------------|-------|------|------|---|---|---|----------------------------------------------------|---|
| NR4A3_HUMAN (Q92570) Orphan nuclear receptor NR4A3 (Nuclear hormone receptor NOR-1) (Neuron-derived orphan receptor 1) (Mitogen-induced nuclear orphan receptor) [MASS=68229]                                                      | *           | 4.95  | *    | *    | * | 1 | 3 | YC[339]PTDQAAAGTDAEHVQQFYNLLTASIDVSR               | 1 |
| NRBP_HUMAN (Q9UHY1) Nuclear receptor-binding protein [MASS=59844]                                                                                                                                                                  | 0.00        | 10.09 | *    | *    | * | 2 | 2 | PQQPQQEEVTSPVPPSVKTPTEPEAEVETR                     | 1 |
|                                                                                                                                                                                                                                    |             |       |      |      |   |   | 3 | LQEEKVRAVFDNLIQLEHLNIVK                            | 1 |
| NRG2_HUMAN (O14511) Pro-neuregulin-2, membrane-bound isoform precursor (Pro-NRG2) [Contains: Neuregulin-2 (NRG-2) (Neural- and thymus-derived activator for ERBB kinases) (NTAK) (Divergent of neuregulin-1) (DON-1)] [MASS=91678] | 0.00        | 5.41  | 0.48 | 0.00 | 1 | 3 | 3 | VALVKVLDKWPLR                                      | 2 |
|                                                                                                                                                                                                                                    |             |       |      |      |   |   | 3 | QM[147]HNHLRQNM[147]C[330]PAHQNRSLANGPSHPR         | 1 |
|                                                                                                                                                                                                                                    |             |       |      |      |   |   | 2 | C[330]NETAK                                        | 1 |
| NRX1A_HUMAN (Q9ULB1) Neurexin-1-alpha precursor (Neurexin I-alpha) [MASS=161882]                                                                                                                                                   | 0.00        | 4.87  | 0.63 | 0.00 | 1 | 3 | 2 | SC[330]EREATVLSYDGSM[147]FMK                       | 1 |
|                                                                                                                                                                                                                                    |             |       |      |      |   |   | 3 | EATVLSYDGSM[147]FMKIQLPVMHTEAEDVSLR                | 1 |
|                                                                                                                                                                                                                                    |             |       |      |      |   |   | 3 | C[330]ENVATLDPITFETPESFISLPK                       | 1 |
| NRX3A_HUMAN (Q9Y4C0) Neurexin-3-alpha precursor (Neurexin III-alpha) [MASS=169922]                                                                                                                                                 | 0.00        | 2.40  | 1.45 | 0.00 | 1 | 2 | 2 | NLDLKGDLYM[147]AGLAQGM[147]YSNLPK                  | 1 |
|                                                                                                                                                                                                                                    |             |       |      |      |   |   | 2 | FSM[147]DC[339]AETAVALSNK                          | 1 |
| NSF_HUMAN (P46459) Vesicle-fusing ATPase (EC 3.6.4.6) (Vesicular-fusion protein NSF) (N-ethylmaleimide sensitive fusion protein) (NEM-sensitive fusion protein) [MASS=82654]                                                       | 1.00        | 4.84  | 0.65 | 0.04 | 2 | 3 | 2 | GILLYGPPGC[330]GK                                  | 1 |
|                                                                                                                                                                                                                                    |             |       |      |      |   |   | 1 | IC[330]SPDK                                        | 1 |
|                                                                                                                                                                                                                                    |             |       |      |      |   |   | 3 | THPSVVPGSIAFSLPQRK                                 | 1 |
| NU160_HUMAN (Q12769) Nuclear pore complex protein Nup160 (Nucleoporin Nup160) (160 kDa nucleoporin) [MASS=149000]                                                                                                                  | *           | 2.20  | *    | *    | * | 1 | 3 | FM[147]LGRC[339]YLVGTGEGQKALEC[339]FC[339]QAASEVGK | 1 |
| NU214_HUMAN (P35658) Nuclear pore complex protein Nup214 (Nucleoporin Nup214) (214 kDa nucleoporin) (CAN protein) [MASS=213765]                                                                                                    | *           | 1.20  | *    | *    | * | 1 | 2 | QGSLINSLKPSGPTPASGQLSSGDK                          | 1 |
|                                                                                                                                                                                                                                    |             |       |      |      |   |   | 2 | LSVAGNC[330]R                                      | 1 |
| NUAM_HUMAN (P28331) NADH-ubiquinone oxidoreductase 75 kDa subunit, mitochondrial precursor (EC 1.6.5.3) (EC 1.6.99.3) (Complex I-75Kd) (CI-75Kd) [MASS=79467]                                                                      | 1.00        | 7.57  | 1.27 | 0.05 | 8 | 4 | 2 | LSVAGNC[339]R                                      | 1 |
|                                                                                                                                                                                                                                    |             |       |      |      |   |   | 2 | FC[339]YHER                                        | 2 |
|                                                                                                                                                                                                                                    |             |       |      |      |   |   | 2 | VVAAC[339]AM[147]PVM[147]K                         | 1 |
|                                                                                                                                                                                                                                    |             |       |      |      |   |   | 3 | DC[330]FIYQGHGVDVGAPIADVILPGAAYTEK                 | 1 |
| 2                                                                                                                                                                                                                                  | FC[330]YHER | 2     |      |      |   |   |   |                                                    |   |

|                                                                                                                                                                                                   |                     |       |      |      |   |   |   |                                                 |   |
|---------------------------------------------------------------------------------------------------------------------------------------------------------------------------------------------------|---------------------|-------|------|------|---|---|---|-------------------------------------------------|---|
| NUBM_HUMAN (P49821) NADH-ubiquinone oxidoreductase 51 kDa subunit, mitochondrial precursor (EC 1.6.5.3) (EC 1.6.99.3) (Complex I-51KD) (CI-51KD) (NADH dehydrogenase flavoprotein 1) [MASS=50817] | 1.00                | 27.37 | 1.03 | 0.43 | 8 | 7 | 2 | HESC[339]GQC[339]TPC[339]R                      | 1 |
|                                                                                                                                                                                                   |                     |       |      |      |   |   | 2 | NAC[339]GSGYDFDFVVR                             | 1 |
|                                                                                                                                                                                                   |                     |       |      |      |   |   | 2 | GAGAYIC[339]GEETALIESIEGK                       | 1 |
|                                                                                                                                                                                                   |                     |       |      |      |   |   | 2 | YLVVNADEGEPGTC[339]K                            | 1 |
|                                                                                                                                                                                                   |                     |       |      |      |   |   | 3 | LKPPFPADVGVFGC[330]PTTVANVETVAVSPTIC[330]R      | 1 |
|                                                                                                                                                                                                   |                     |       |      |      |   |   | 3 | LIEFYKHESC[339]GQC[339]TPC[339]R                | 1 |
|                                                                                                                                                                                                   |                     |       |      |      |   |   | 2 | YLVVNADEGEPGTC[339]KDR                          | 1 |
| 2                                                                                                                                                                                                 | NAC[330]GSGYDFDFVVR | 1     |      |      |   |   |   |                                                 |   |
| NUHM_HUMAN (P19404) NADH-ubiquinone oxidoreductase 24 kDa subunit, mitochondrial precursor (EC 1.6.5.3) (EC 1.6.99.3) [MASS=27391]                                                                | 1.00                | 28.92 | 1.45 | 0.01 | 2 | 4 | 2 | IEAIVKNYPEGHK                                   | 1 |
|                                                                                                                                                                                                   |                     |       |      |      |   |   | 2 | YHIQVC[339]TTTPC[339]M[147]LR                   | 1 |
|                                                                                                                                                                                                   |                     |       |      |      |   |   | 2 | ARAAGLTAHWGRHVR                                 | 1 |
|                                                                                                                                                                                                   |                     |       |      |      |   |   | 3 | SGRFSC[339]EPAGGLTSLTEPPKGPFGVQAGL              | 1 |
|                                                                                                                                                                                                   |                     |       |      |      |   |   | 2 | YHIQVC[330]TTTPC[330]M[147]LR                   | 1 |
| NUIM_HUMAN (O00217) NADH-ubiquinone oxidoreductase 23 kDa subunit, mitochondrial precursor (EC 1.6.5.3) (EC 1.6.99.3) (Complex I-23KD) (CI-23KD) (TYKY subunit) [MASS=23705]                      | 0.00                | 2.38  | 1.71 | 0.00 | 1 | 1 | 2 | C[339]IAC[339]K                                 | 1 |
|                                                                                                                                                                                                   |                     |       |      |      |   |   |   |                                                 |   |
| NUKM_HUMAN (O75251) NADH-ubiquinone oxidoreductase 20 kDa subunit, mitochondrial precursor (EC 1.6.5.3) (EC 1.6.99.3) (Complex I-20KD) (CI-20KD) (PSST subunit) [MASS=23563]                      | 0.45                | 12.68 | 1.60 | 0.00 | 1 | 1 | 3 | IVPVDIYIPGC[339]PPTAEALLYGILQLQR                | 1 |
|                                                                                                                                                                                                   |                     |       |      |      |   |   |   |                                                 |   |
| NUMM_HUMAN (O75380) NADH-ubiquinone oxidoreductase 13 kDa-A subunit, mitochondrial precursor (EC 1.6.5.3) (EC 1.6.99.3) (Complex I-13KD-A) (CI-13KD-A) [MASS=13712]                               | 1.00                | 12.10 | 1.22 | 0.05 | 5 | 1 | 3 | VIAC[339]DGGGGALGHPK                            | 1 |
|                                                                                                                                                                                                   |                     |       |      |      |   |   | 2 | VIAC[330]DGGGGALGHPK                            | 2 |
|                                                                                                                                                                                                   |                     |       |      |      |   |   | 2 | VIAC[339]DGGGGALGHPK                            | 2 |
| NVL_HUMAN (O15381) Nuclear valosin-containing protein-like (Nuclear VCP-like protein) (NVLp) [MASS=95050]                                                                                         | 0.00                | 9.00  | *    | *    | * | 3 | 3 | KDSFFLDLSC[330]EKSNDK                           | 1 |
|                                                                                                                                                                                                   |                     |       |      |      |   |   | 3 | TLLAHAIAGELDLPILKVAPEIVSGVSGESEQK               | 1 |
|                                                                                                                                                                                                   |                     |       |      |      |   |   | 3 | C[339]DC[339]YTGADLSALVREASIC[330]ALRQEM[147]AR | 1 |
| O51Q1_HUMAN (Q8NH59) Olfactory receptor 51Q1 [MASS=35747]                                                                                                                                         | 0.00                | 9.15  | 2.74 | 0.00 | 1 | 1 | 3 | LRALNNC[339]LSHILAVLVLYIPM[147]VGVSM[147]THR    | 1 |
| O51V1_HUMAN (Q9H2C8) Olfactory receptor 51V1 (Odorant receptor HOR3'beta1) (Olfactory receptor OR11-36) [MASS=36882]                                                                              | 0.00                | 5.61  | 1.99 | 0.00 | 1 | 1 | 3 | YIAIC[339]NPLRYSSILTNSR                         | 1 |
| O52K1_HUMAN (Q8NGK4) Olfactory receptor 52K1 [MASS=35289]                                                                                                                                         | 0.00                | 8.60  | 0.89 | 0.00 | 1 | 1 | 3 | AFGTC[339]VSHIGAILSTYTPVVISSVMHR                | 1 |

|                                                                                                                                                                                                                                                                                                |                                                     |       |      |      |   |   |   |                                    |   |
|------------------------------------------------------------------------------------------------------------------------------------------------------------------------------------------------------------------------------------------------------------------------------------------------|-----------------------------------------------------|-------|------|------|---|---|---|------------------------------------|---|
| OBSCN_HUMAN (Q5VST9) Obscurin<br>(Obscurin-myosin light chain kinase) (Obscurin-<br>MLCK) (Obscurin-RhoGEF) [MASS=868479]                                                                                                                                                                      | 0.00                                                | 1.44  | 1.12 | 0.00 | 1 | 8 | 2 | ASLIVRERPAAIK                      | 1 |
|                                                                                                                                                                                                                                                                                                |                                                     |       |      |      |   |   | 1 | HSLRQDGSR                          | 1 |
|                                                                                                                                                                                                                                                                                                |                                                     |       |      |      |   |   | 3 | HRLVLHNVGFADR                      | 1 |
|                                                                                                                                                                                                                                                                                                |                                                     |       |      |      |   |   | 3 | LSSIDLNDQVEGDDR                    | 1 |
|                                                                                                                                                                                                                                                                                                |                                                     |       |      |      |   |   | 2 | LLGPKAPGPSTGDLTGPGPC[330]PR        | 1 |
|                                                                                                                                                                                                                                                                                                |                                                     |       |      |      |   |   | 2 | LEVRVKPVVFLK                       | 2 |
|                                                                                                                                                                                                                                                                                                |                                                     |       |      |      |   |   | 2 | AGKTM[147]AIAAQGAC[330]RSLTIYR     | 1 |
|                                                                                                                                                                                                                                                                                                |                                                     |       |      |      |   |   | 2 | QGRKYILVVR                         | 1 |
| OCLN_HUMAN (Q16625) Occludin<br>[MASS=59143]                                                                                                                                                                                                                                                   | *                                                   | 12.26 | *    | *    | * | 2 | 3 | PLESPPPYRPDEFKPNHYAPSNDIYGGEMHVR   | 1 |
| 3                                                                                                                                                                                                                                                                                              | AAKGF[147]LAM[147]AAFC[330]FIAALVIFVTSVIRSEM[147]SR | 1     |      |      |   |   |   |                                    |   |
| OCRL_HUMAN (Q01968) Inositol<br>polyphosphate 5-phosphatase OCRL-1 (EC<br>3.1.3.36) (Lowe oculocerebrorenal syndrome<br>protein) [MASS=104204]                                                                                                                                                 | *                                                   | 4.77  | *    | *    | * | 2 | 2 | EVPVTKLIDLEEDSFLEKEK               | 1 |
| 3                                                                                                                                                                                                                                                                                              | HEVVIWLGDLNYRLC[339]M[147]PDANEVK                   | 1     |      |      |   |   |   |                                    |   |
| OCTC_HUMAN (Q9UKG9) Peroxisomal<br>carnitine O-octanoyltransferase (EC 2.3.1.137)<br>(COT) [MASS=70178]                                                                                                                                                                                        | 0.00                                                | 9.48  | 2.39 | 0.00 | 1 | 3 | 3 | GRAFVFDVIHEGC[339]LVTPPELLR        | 1 |
| 2                                                                                                                                                                                                                                                                                              | C[339]HSEPDGPGIAALTSEERTR                           | 1     |      |      |   |   |   |                                    |   |
| 3                                                                                                                                                                                                                                                                                              | TESEGRSPNHIVVLC[339]R                               | 1     |      |      |   |   |   |                                    |   |
| ODBB_HUMAN (P21953) 2-oxoisovalerate<br>dehydrogenase subunit beta, mitochondrial<br>precursor (EC 1.2.4.4) (Branched-chain alpha-<br>keto acid dehydrogenase E1 component beta<br>chain) (BCKDH E1-beta) [MASS=43122]                                                                         | 0.00                                                | 4.85  | 1.10 | 0.00 | 1 | 1 | 2 | GLLLSC[339]IEDKNPC[339]IFFEPEK     | 1 |
| ODO1_HUMAN (Q02218) 2-oxoglutarate<br>dehydrogenase E1 component, mitochondrial<br>precursor (EC 1.2.4.2) (Alpha-ketoglutarate<br>dehydrogenase) [MASS=113475]                                                                                                                                 | 0.00                                                | 1.40  | 1.01 | 0.00 | 1 | 1 | 2 | FGLEG[330]EVLIPALK                 | 1 |
| ODP2_HUMAN (P10515) Dihydrolipoalysine-<br>residue acetyltransferase component of<br>pyruvate dehydrogenase complex,<br>mitochondrial precursor (EC 2.3.1.12)<br>(Pyruvate dehydrogenase complex E2 subunit)<br>(PDCE2) (E2) (Dihydrolipoamide S-<br>acetyltransferase component) [MASS=65781] | 1.00                                                | 12.05 | 1.58 | 0.09 | 2 | 3 | 3 | NFSAIINPPQAC[339]ILAIGASEDKLVADNEK | 1 |
| 2                                                                                                                                                                                                                                                                                              | ILVAEGTRDVPVIGAIIC[339]ITVGK                        | 1     |      |      |   |   |   |                                    |   |
| 2                                                                                                                                                                                                                                                                                              | DVPIGAIIC[339]ITVGKPEDIEAFK                         | 1     |      |      |   |   |   |                                    |   |

|                                                                                                                                                                                                                                                                             |      |       |      |      |   |   |   |                                               |   |
|-----------------------------------------------------------------------------------------------------------------------------------------------------------------------------------------------------------------------------------------------------------------------------|------|-------|------|------|---|---|---|-----------------------------------------------|---|
| ODPA_HUMAN (P08559) Pyruvate dehydrogenase E1 component alpha subunit, somatic form, mitochondrial precursor (EC 1.2.4.1) (PDHE1-A type I) [MASS=43295]                                                                                                                     | 0.00 | 1.28  | *    | *    | * | 1 | 2 | C[339]DLHR                                    | 1 |
| ODPB_HUMAN (P11177) Pyruvate dehydrogenase E1 component subunit beta, mitochondrial precursor (EC 1.2.4.1) (PDHE1-B) [MASS=39219]                                                                                                                                           | 0.76 | 10.86 | 0.99 | 0.00 | 1 | 2 | 2 | PVGHC[330]LEAAAVLSK                           | 1 |
|                                                                                                                                                                                                                                                                             |      |       |      |      |   |   | 2 | RIIDTPISEM[147]GFAGIAVGAAMAGLR                | 1 |
| ODPX_HUMAN (O00330) Pyruvate dehydrogenase protein X component, mitochondrial precursor (Dihydrolipoamide dehydrogenase-binding protein of pyruvate dehydrogenase complex) (Lipoyl-containing pyruvate dehydrogenase complex component X) (E3-binding protein) [MASS=54122] | 0.97 | 7.98  | 1.86 | 0.00 | 1 | 2 | 2 | STVPHAYATADC[339]DLGAVLK                      | 1 |
|                                                                                                                                                                                                                                                                             |      |       |      |      |   |   | 3 | ILM[147]PSLSPTMEEGNIVKWLKK                    | 1 |
|                                                                                                                                                                                                                                                                             |      |       |      |      |   |   | 3 | TQEQC[330]VHNETKNELEK                         | 1 |
| OPA1_HUMAN (O60313) Dynamin-like 120 kDa protein, mitochondrial precursor (Optic atrophy 1 gene protein) [MASS=111657]                                                                                                                                                      | 1.00 | 7.19  | 1.24 | 0.09 | 7 | 5 | 2 | TALNHC[339]NLC[339]R                          | 1 |
|                                                                                                                                                                                                                                                                             |      |       |      |      |   |   | 3 | SIYHSHHPTLKLQR                                | 1 |
|                                                                                                                                                                                                                                                                             |      |       |      |      |   |   | 3 | TQEQC[339]VHNETKNELEK                         | 1 |
|                                                                                                                                                                                                                                                                             |      |       |      |      |   |   | 3 | C[339]NEEHPAYLASDEITTVR                       | 1 |
|                                                                                                                                                                                                                                                                             |      |       |      |      |   |   | 2 | C[339]NEEHPAYLASDEITTVR                       | 1 |
|                                                                                                                                                                                                                                                                             |      |       |      |      |   |   | 2 | TQEQC[330]VHNETKNELEK                         | 1 |
| OPCM_HUMAN (Q14982) Opioid-binding protein/cell adhesion molecule precursor (OBCAM) (Opioid-binding cell adhesion molecule) (OPCML) [MASS=38007]                                                                                                                            | 0.99 | 6.09  | 0.78 | 0.00 | 1 | 1 | 2 | DQSGEYEC[330]SALNDVAAPDVRK                    | 1 |
|                                                                                                                                                                                                                                                                             |      |       |      |      |   |   | 2 | LC[330]VQMAAGSWAGGFGISMVK                     | 1 |
| OR2A7_HUMAN (Q96R45) Olfactory receptor 2A7 [MASS=34726]                                                                                                                                                                                                                    | 0.00 | 8.06  | 0.56 | 0.00 | 1 | 1 | 2 | EQKKYLPLFHSLFNPM[NLPLIC[339]SLR               | 1 |
|                                                                                                                                                                                                                                                                             |      |       |      |      |   |   | 3 | EQKKYLPLFHSLFNPM[147]LNPLIC[339]SLR           | 1 |
| OR5DD_HUMAN (Q8NGL4) Olfactory receptor 5D13 [MASS=35447]                                                                                                                                                                                                                   | 0.00 | 19.11 | 0.80 | 0.00 | 1 | 2 | 3 | LNSKLHTIM[147]C[330]FFLSHLSLTDFC[339]FSTVVTPK | 1 |
|                                                                                                                                                                                                                                                                             |      |       |      |      |   |   | 3 | LC[339]FIIAIFNEVSSLIIILTSYM[147]LIFTTIMK      | 1 |
| OR6A2_HUMAN (O95222) Olfactory receptor 6A2 (Olfactory receptor 11-55) (OR11-55) (hP2 olfactory receptor) [MASS=36154]                                                                                                                                                      | *    | 6.12  | *    | *    | * | 1 | 2 | LC[330]VQMAAGSWAGGFGISMVK                     | 1 |
| OR8S1_HUMAN (Q8NH09) Olfactory receptor 8S1 [MASS=39694]                                                                                                                                                                                                                    | 0.00 | 8.91  | 0.78 | 0.00 | 1 | 1 | 3 | TISVEGC[339]LAQVFFVVTAGTEAC[339]LLSGMAYDR     | 1 |



|                                                                                                                                                                  |      |       |      |      |   |   |   |                                                  |   |
|------------------------------------------------------------------------------------------------------------------------------------------------------------------|------|-------|------|------|---|---|---|--------------------------------------------------|---|
| ORAV1_HUMAN (Q8WV07) Oral cancer overexpressed protein 1 (Tumor amplified and overexpressed sequence 1) [MASS=15354]                                             | 0.00 | 21.17 | 1.14 | 0.00 | 1 | 1 | 3 | IGSEIGC[339]YQGFAFAWKC[339]LLHSC[339]TTEKDSR     | 1 |
| ORC1_HUMAN (Q13415) Origin recognition complex subunit 1 (Replication control protein 1) [MASS=97349]                                                            | 0.00 | 3.95  | 8.58 | 0.00 | 1 | 2 | 2 | EARLVVLAIAINTMDLPER                              | 1 |
|                                                                                                                                                                  |      |       |      |      |   |   | 2 | MC[339]FQPYTYSQLQILR                             | 1 |
| OSBP1_HUMAN (P22059) Oxysterol-binding protein 1 [MASS=89420]                                                                                                    | *    | 3.35  | *    | *    | * | 2 | 1 | REAEAM[147]K                                     | 1 |
|                                                                                                                                                                  |      |       |      |      |   |   | 2 | AFRGATVLPANTPGNVGSGK                             | 1 |
|                                                                                                                                                                  |      |       |      |      |   |   | 2 | QC[330]TMEMATGEVDVPLVSIFK                        | 1 |
|                                                                                                                                                                  |      |       |      |      |   |   | 3 | ESM[147]FSWDETEYK                                | 1 |
|                                                                                                                                                                  |      |       |      |      |   |   | 3 | WPVASSIDRNEMLEIQVFNYSKVFSNK                      | 1 |
| OTOF_HUMAN (Q9HC10) Otoferlin (Fer-1-like protein 2) [MASS=226735]                                                                                               | *    | 4.96  | *    | *    | * | 5 | 1 | RHTVRDK                                          | 5 |
|                                                                                                                                                                  |      |       |      |      |   |   | 3 | VLC[339]NGGSSSHSTGEVVVTM[147]EPEVPIKKLETM[147]VK | 1 |
| OVOL2_HUMAN (Q9BRP0) Transcription factor Ovo-like 2 (hOvo2) (Zinc finger protein 339) [MASS=30438]                                                              | *    | 2.91  | *    | *    | * | 1 | 2 | QRPVARSK                                         | 1 |
| PA2G6_HUMAN (O60733) 85 kDa calcium-independent phospholipase A2 (EC 3.1.1.4) (iPLA2) (CaI-PLA2) (Group VI phospholipase A2) (GVI PLA2) [MASS=89902]             | 0.00 | 7.57  | *    | *    | * | 3 | 3 | M[147]LLKRGCC[330]NVNSTSSAGNTALHVAVMR            | 1 |
|                                                                                                                                                                  |      |       |      |      |   |   | 3 | VLLLC[339]NARC[330]NIM[147]GPNGYPIHSAM[147]K     | 1 |
|                                                                                                                                                                  |      |       |      |      |   |   | 3 | NAEMARMLLKR                                      | 1 |
|                                                                                                                                                                  |      |       |      |      |   |   | 3 | MLLKRGCC[330]NVNSTSSAGNTALHVAVMR                 | 1 |
| PACN1_HUMAN (Q9BY11) Protein kinase C and casein kinase substrate in neurons protein 1 [MASS=50965]                                                              | *    | 3.38  | *    | *    | * | 1 | 2 | AYHLAC[330]KEEKLAMTR                             | 1 |
| PADI2_HUMAN (Q9Y2J8) Protein-arginine deiminase type-2 (EC 3.5.3.15) (Protein-arginine deiminase type II) (Peptidylarginine deiminase II) (PAD-H19) [MASS=75563] | *    | 5.86  | *    | *    | * | 2 | 2 | DGHGEAIMFKGLGGMSSKR                              | 1 |
|                                                                                                                                                                  |      |       |      |      |   |   | 2 | ASWTWGPEGQGAILLVNC[339]DR                        | 1 |
| PANK3_HUMAN (Q9H999) Pantothenate kinase 3 (EC 2.7.1.33) (Pantothenic acid kinase 3) (hPanK3) [MASS=41094]                                                       | *    | 9.19  | *    | *    | * | 1 | 3 | RVTGTSLGGGTFLGLCC[330]SLLTGC[339]ESFEEALEMASK    | 1 |
| PANK4_HUMAN (Q9NVE7) Pantothenate kinase 4 (EC 2.7.1.33) (Pantothenic acid kinase 4) (hPanK4) [MASS=85990]                                                       | 0.00 | 2.46  | 3.12 | 0.03 | 2 | 1 | 3 | SLLHM[147]ISNDIGQLACC[330]LHAR                   | 1 |
|                                                                                                                                                                  |      |       |      |      |   |   | 3 | SLLHMISNDIGQLACC[339]LHAR                        | 1 |

|                                                                                                                                                                                                                                                                           |      |       |      |      |   |   |   |                                            |   |
|---------------------------------------------------------------------------------------------------------------------------------------------------------------------------------------------------------------------------------------------------------------------------|------|-------|------|------|---|---|---|--------------------------------------------|---|
| PAPS1_HUMAN (O43252) Bifunctional 3'-phosphoadenosine 5'-phosphosulfate synthetase 1 (PAPS synthetase 1) (PAPSS 1) (Sulfurylase kinase 1) (SK1) (SK 1) [Includes: Sulfate adenyltransferase (EC 2.7.7.4) (Sulfate adenylate transferase) (SAT) (ATP-sulfuryl [MASS=70833] | 0.00 | 5.29  | *    | *    | * | 2 | 2 | M[147]VAGANFYIVGRDPAGMPHPETGK              | 1 |
|                                                                                                                                                                                                                                                                           |      |       |      |      |   |   | 2 | NLGFSPEDR                                  | 1 |
| PARK7_HUMAN (Q99497) Protein DJ-1 (Oncogene DJ1) [MASS=19891]                                                                                                                                                                                                             | 1.00 | 8.47  | 0.80 | 0.00 | 2 | 1 | 2 | VTVAGLAGKDPVQC[339]SR                      | 1 |
|                                                                                                                                                                                                                                                                           |      |       |      |      |   |   | 2 | VTVAGLAGKDPVQC[330]SR                      | 1 |
| PARP2_HUMAN (Q9UGN5) Poly [ADP-ribose] polymerase 2 (EC 2.4.2.30) (PARP-2) (NAD(+) ADP-ribosyltransferase 2) (Poly[ADP-ribose] synthetase 2) (pADPRT-2) (hPARP-2) [MASS=66205]                                                                                            | 0.00 | 2.92  | 0.50 | 0.00 | 1 | 1 | 2 | M[147]GQHSLVAC[330]SGNLNKAK                | 1 |
| PAX3_HUMAN (P23760) Paired box protein Pax-3 (HUP2) [MASS=52967]                                                                                                                                                                                                          | 0.00 | 10.02 | 2.72 | 0.00 | 1 | 3 | 2 | QLRVSHGC[339]VSKILC[339]R                  | 1 |
|                                                                                                                                                                                                                                                                           |      |       |      |      |   |   | 3 | TTFTAEQLEELER                              | 1 |
|                                                                                                                                                                                                                                                                           |      |       |      |      |   |   | 3 | ILC[330]RYQETGSIRPGAIGGSK                  | 1 |
| PAX8_HUMAN (Q06710) Paired box protein Pax-8 [MASS=48118]                                                                                                                                                                                                                 | *    | 2.67  | *    | *    | * | 1 | 2 | RKMDDSDQDSC[339]R                          | 1 |
| PAXI_HUMAN (P49023) Paxillin [MASS=64533]                                                                                                                                                                                                                                 | *    | 4.40  | *    | *    | * | 1 | 3 | PGSQLDSM[147]LGSLQSDLNKLGVATVAK            | 1 |
| PCBP2_HUMAN (Q15366) Poly(rC)-binding protein 2 (Alpha-CP2) (hnRNP-E2) [MASS=38580]                                                                                                                                                                                       | 0.31 | 4.38  | 0.31 | 0.00 | 1 | 1 | 2 | AITIAGIPQSIIEC[330]VK                      | 1 |
| PCCB_HUMAN (P05166) Propionyl-CoA carboxylase beta chain, mitochondrial precursor (EC 6.4.1.3) (PCCase subunit beta) (Propanoyl-CoA:carbon dioxide ligase subunit beta) [MASS=58205]                                                                                      | *    | 14.84 | *    | *    | * | 3 | 3 | ISLLLDPGSFVESDM[147]FVEHRC[330]ADFGMAADKNK | 1 |
|                                                                                                                                                                                                                                                                           |      |       |      |      |   |   | 3 | VTVITRKAYGGAYDVM[147]SSK                   | 1 |
|                                                                                                                                                                                                                                                                           |      |       |      |      |   |   | 3 | GRINGRLVYVFSQDFTVFGGSLSGAHAQK              | 1 |
| PCD18_HUMAN (Q9HCL0) Protocadherin-18 precursor [MASS=125307]                                                                                                                                                                                                             | *    | 2.84  | *    | *    | * | 1 | 3 | PEININLMSPGKEEISYIFEGDPIDTFVALVR           | 1 |
| PCD19_HUMAN (Q8TAB3) Protocadherin-19 precursor [MASS=126252]                                                                                                                                                                                                             | *    | 2.53  | *    | *    | * | 1 | 3 | VIILDVNDNTPVITAPPLINGTAEVYIPR              | 1 |
| PCDA1_HUMAN (Q9Y513) Protocadherin alpha 1 precursor (PCDH-alpha1) [MASS=102951]                                                                                                                                                                                          | *    | 2.21  | *    | *    | * | 1 | 3 | SYEIQVKAVDKGSPPMNSHC[339]K                 | 1 |
| PCDG5_HUMAN (Q9Y5G8) Protocadherin gamma A5 precursor (PCDH-gamma-A5) [MASS=100934]                                                                                                                                                                                       | 0.00 | 4.83  | *    | *    | * | 2 | 3 | ISETFQLDSNLGEISTLQSLDYEESR                 | 1 |
|                                                                                                                                                                                                                                                                           |      |       |      |      |   |   | 2 | MKIYGVEVEIIDINDNFR                         | 1 |
| PCDLK_HUMAN (Q9BYE9) Protocadherin LKC precursor (PC-LKC) [MASS=141574]                                                                                                                                                                                                   | 0.00 | 1.68  | *    | *    | * | 1 | 3 | TAAGVMPSAPAIPGTNMYNTER                     | 2 |

|                                                                                                                                                                                                                                              |      |      |      |      |   |   |   |                                       |   |
|----------------------------------------------------------------------------------------------------------------------------------------------------------------------------------------------------------------------------------------------|------|------|------|------|---|---|---|---------------------------------------|---|
| PCLO_HUMAN (Q9Y6V0) Protein piccolo (Aczonin) [MASS=566653]                                                                                                                                                                                  | *    | 2.91 | *    | *    | * | 9 | 2 | AVLPTKLEK                             | 1 |
|                                                                                                                                                                                                                                              |      |      |      |      |   |   | 3 | RSQEVTDFLAPLQSSSRLLHSYVK              | 1 |
|                                                                                                                                                                                                                                              |      |      |      |      |   |   | 2 | PSQSFPTGEKVTDFSKAIPR                  | 1 |
|                                                                                                                                                                                                                                              |      |      |      |      |   |   | 3 | EQEKIMVQKK                            | 1 |
|                                                                                                                                                                                                                                              |      |      |      |      |   |   | 3 | VMSDGPVKPEGAKPPNHR                    | 1 |
|                                                                                                                                                                                                                                              |      |      |      |      |   |   | 2 | PTGLSLTSSM[147]TLNLVTSADYK            | 1 |
|                                                                                                                                                                                                                                              |      |      |      |      |   |   | 2 | AEEDPM[147]EDPYELKLLKHQIK             | 1 |
|                                                                                                                                                                                                                                              |      |      |      |      |   |   | 2 | PPIAPKPVIPQLPTTTQK                    | 1 |
|                                                                                                                                                                                                                                              |      |      |      |      |   |   | 1 | AIPRPASDSK                            | 1 |
| PCNT_HUMAN (O95613) Pericentrin (Pericentrin B) (Kendrin) [MASS=378079]                                                                                                                                                                      | *    | 1.92 | *    | *    | * | 4 | 2 | LLKHHLQK                              | 1 |
|                                                                                                                                                                                                                                              |      |      |      |      |   |   | 2 | SQLSELQKDAAEK                         | 1 |
|                                                                                                                                                                                                                                              |      |      |      |      |   |   | 3 | C[330]IAGDLQKTLSEEQEKANSVQK           | 1 |
|                                                                                                                                                                                                                                              |      |      |      |      |   |   | 2 | QVLMQEEEEIKRLEEM[147]NINIR            | 1 |
| PCSK6_HUMAN (P29122) Proprotein convertase subtilisin/kexin type 6 precursor (EC 3.4.21.-) (Paired basic amino acid cleaving enzyme 4) (Subtilisin/kexin-like protease PACE4) (Subtilisin-like proprotein convertase 4) (SPC4) [MASS=106420] | *    | 4.44 | *    | *    | * | 3 | 2 | NC[339]LKC[330]HPSC[330]KK            | 1 |
|                                                                                                                                                                                                                                              |      |      |      |      |   |   | 2 | SIPLVQVLR                             | 1 |
|                                                                                                                                                                                                                                              |      |      |      |      |   |   | 3 | IGGIRM[147]LDGDVTDVVEAKSLGIR          | 1 |
| PCYOX_HUMAN (Q9UHG3) Prenylcysteine oxidase precursor (EC 1.8.3.5) (PCL1) [MASS=56611]                                                                                                                                                       | 0.00 | 2.18 | 3.83 | 0.00 | 1 | 1 | 2 | LVC[339]SGLLQASK                      | 1 |
| PDIA3_HUMAN (P30101) Protein disulfide-isomerase A3 precursor (EC 5.3.4.1) (Disulfide isomerase ER-60) (ERp60) (58 kDa microsomal protein) (p58) (ERp57) (58 kDa glucose-regulated protein) [MASS=56782]                                     | *    | 1.58 | *    | *    | * | 1 | 1 | NRVM[147]MVAK                         | 1 |
| PDZK3_HUMAN (O15018) PDZ domain-containing protein 3 (PDZ domain-containing protein 2) (Activated in prostate cancer protein) [MASS=301609]                                                                                                  | *    | 1.27 | *    | *    | * | 1 | 3 | NSIPGGPSGEDHLYFTPRPATRYSMPAQFSSHFR    | 1 |
| PE2R2_HUMAN (P43116) Prostaglandin E2 receptor, EP2 subtype (Prostanoid EP2 receptor) (PGE receptor, EP2 subtype) [MASS=39760]                                                                                                               | 0.00 | 7.54 | 0.94 | 0.00 | 1 | 1 | 3 | AC[330]TYFAFAMTFFSLATMLMLFAM[147]ALER | 1 |

|                                                                                                                                                                                                                                                                              |      |       |      |      |   |   |                                                                                                                            |                      |   |
|------------------------------------------------------------------------------------------------------------------------------------------------------------------------------------------------------------------------------------------------------------------------------|------|-------|------|------|---|---|----------------------------------------------------------------------------------------------------------------------------|----------------------|---|
| PECI_HUMAN (O75521) Peroxisomal 3,2-trans-enoyl-CoA isomerase (EC 5.3.3.8) (Dodecenoyl-CoA isomerase) (Delta(3),delta(2)-enoyl-CoA isomerase) (D3,D2-enoyl-CoA isomerase) (DBI-related protein 1) (DRS-1) (Hepatocellular carcinoma-associated antigen 88) (NY [MASS=39609]) | 0.99 | 4.18  | 0.90 | 0.00 | 1 | 1 | 2                                                                                                                          | LHAVNAEEC[330]NVLQGR | 1 |
| PEPL1_HUMAN (Q8NDH3) Probable aminopeptidase NPEPL1 (EC 3.4.11.-) (Aminopeptidase-like 1) [MASS=55861]                                                                                                                                                                       | 0.00 | 5.54  | 0.19 | 0.00 | 1 | 2 | 1 TTM[147]PGM[147]KR<br>3 DC[330]GGAAAVLGAFRRAAIKQGFK                                                                      | 1<br>1               |   |
| PGAM1_HUMAN (P18669) Phosphoglycerate mutase 1 (EC 5.4.2.1) (EC 5.4.2.4) (EC 3.1.3.13) (Phosphoglycerate mutase isozyme B) (PGAM-B) (BPG-dependent PGAM 1) [MASS=28673]                                                                                                      | 1.00 | 15.02 | 1.26 | 0.00 | 2 | 2 | 2 YADLTEDQLPSC[330]ESLKDTIAR<br>2 YADLTEDQLPSC[339]ESLKDTIAR<br>2 ALPFWNEEIVPQIKEGK                                        | 1<br>1<br>1          |   |
| PGBM_HUMAN (P98160) Basement membrane-specific heparan sulfate proteoglycan core protein precursor (HSPG) (Perlecan) (PLC) [MASS=468822]                                                                                                                                     | *    | 0.64  | *    | *    | * | 2 | 2 AGFFGDAMKATATSC[339]R<br>2 PLPC[339]GPQEAAC[330]R                                                                        | 1<br>1               |   |
| PGCB_HUMAN (Q96GW7) Brevican core protein precursor (Brain-enriched hyaluronan-binding protein) (Protein BEHAB) [MASS=99117]                                                                                                                                                 | 0.88 | 6.15  | 0.87 | 0.27 | 2 | 4 | 2 AVLGSPRVK<br>3 IAGDAPLQGVGGALTI PC[330]HVHYLRPPPSR<br>1 PPPSRR                                                           | 1<br>1<br>2          |   |
| PGK1_HUMAN (P00558) Phosphoglycerate kinase 1 (EC 2.7.2.3) (Primer recognition protein 2) (PRP 2) [MASS=44483]                                                                                                                                                               | 1.00 | 15.14 | 0.91 | 0.02 | 2 | 4 | 2 WEAPQISC[330]VPR<br>2 AC[330]ANPAAGSVILLENLR<br>3 IKA AVPSIKFC[339]LDNGAK<br>2 DVLFLKDC[330]VGPEVEK<br>3 ELNYFAKALES PER | 1<br>1<br>1<br>1     |   |
| PGTB_HUMAN (P53611) Geranylgeranyl transferase type-2 subunit beta (EC 2.5.1.60) (Geranylgeranyl transferase type II subunit beta) (Rab geranylgeranyltransferase subunit beta) (Rab geranyl-geranyltransferase subunit beta) (Rab GG transferase beta) (Rab G [MASS=36924]) | 0.44 | 5.44  | 0.43 | 0.00 | 1 | 1 | 2 AIEFVLSC[330]M[147]NFDGGFGC[330]R                                                                                        | 1                    |   |

|                                                                                                                                                                                                                                                                              |      |      |      |      |   |   |   |                                        |   |
|------------------------------------------------------------------------------------------------------------------------------------------------------------------------------------------------------------------------------------------------------------------------------|------|------|------|------|---|---|---|----------------------------------------|---|
| PHLA1_HUMAN (Q8WV24) Pleckstrin homology-like domain family A member 1 (T-cell death-associated gene 51 protein) (Apoptosis-associated nuclear protein) (Proline- and histidine-rich protein) (Proline- and glutamine-rich protein) (PQ-rich protein) [MASS=29524]           | 0.00 | 7.34 | 0.63 | 0.00 | 1 | 1 | 2 | C[330]PQDQGWNAEITLQM[147]VQYK          | 1 |
| PHLPP_HUMAN (O60346) PH domain leucine-rich repeat-containing protein phosphatase (EC 3.1.3.16) (PH domain leucine-rich repeat protein phosphatase) (Pleckstrin homology domain-containing family E protein 1) (Suprachiasmatic nucleus circadian oscillatory [MASS=184671]) | 0.00 | 3.44 | 5.59 | 0.00 | 1 | 3 | 3 | C[339]VPLLTGHPHLK                      | 1 |
|                                                                                                                                                                                                                                                                              |      |      |      |      |   |   | 3 | AIDSPGGAVREGSC[330]EEKAAAAVAPGGLQSTPGR | 1 |
|                                                                                                                                                                                                                                                                              |      |      |      |      |   |   | 3 | LLAGHNQLARLPER                         | 1 |
| PHYIP_HUMAN (Q92561) Phytanoyl-CoA hydroxylase-interacting protein (Phytanoyl-CoA hydroxylase-associated protein 1) (PAHXAP1) (PAHX-AP1) [MASS=37572]                                                                                                                        | 0.95 | 3.64 | 0.89 | 0.00 | 1 | 1 | 2 | THC[339]GNM[147]LQPYLK                 | 1 |
| PI3R4_HUMAN (Q99570) Phosphoinositide 3-kinase regulatory subunit 4 (EC 2.7.11.1) (PI3-kinase regulatory subunit 4) (PI3-kinase p150 subunit) (Phosphoinositide 3-kinase adaptor protein) [MASS=152971]                                                                      | 0.00 | 3.02 | 0.73 | 0.00 | 1 | 2 | 2 | IRLNSAQNC[339]LPFQKASEK                | 1 |
|                                                                                                                                                                                                                                                                              |      |      |      |      |   |   | 2 | LLSQGM[147]TEEEEDKLLALKDFMMK           | 1 |
| PI52A_HUMAN (P48426) Phosphatidylinositol-4-phosphate 5-kinase type-2 alpha (EC 2.7.1.68) (Phosphatidylinositol-4-phosphate 5-kinase type II alpha) (1-phosphatidylinositol-4-phosphate 5-kinase 2-alpha) (PtdIns(4)P-5-kinase isoform 2-alpha) (PIP5KII-alpha) [MASS=46224] | *    | 4.19 | *    | *    | * | 1 | 3 | EVYFMAIIDILTHYDAK                      | 1 |
| PIGT_HUMAN (Q969N2) GPI transamidase component PIG-T precursor (Phosphatidylinositol-glycan biosynthesis, class T protein) [MASS=65699]                                                                                                                                      | *    | 4.84 | *    | *    | * | 2 | 2 | VSIQFERALLK                            | 1 |
|                                                                                                                                                                                                                                                                              |      |      |      |      |   |   | 2 | MFSRTLTEPC[339]PLASESR                 | 1 |
| PIN1_HUMAN (Q13526) Peptidyl-prolyl cis-trans isomerase NIMA-interacting 1 (EC 5.2.1.8) (Rotamase Pin1) (PPlase Pin1) [MASS=18243]                                                                                                                                           | *    | 4.29 | *    | *    | * | 1 | 1 | MSRSSGR                                | 1 |

|                                                                                                                                                                                                                                |      |       |      |      |   |   |                       |                                                                                                                                                       |                       |
|--------------------------------------------------------------------------------------------------------------------------------------------------------------------------------------------------------------------------------|------|-------|------|------|---|---|-----------------------|-------------------------------------------------------------------------------------------------------------------------------------------------------|-----------------------|
| PK3CG_HUMAN (P48736) Phosphatidylinositol-4,5-bisphosphate 3-kinase catalytic subunit gamma isoform (EC 2.7.1.153) (PI3-kinase p110 subunit gamma) (PtdIns-3-kinase subunit p110) (PI3K) (PI3Kgamma) (p120-PI3K) [MASS=126453] | 0.32 | 1.18  | 0.39 | 0.00 | 1 | 1 | 2                     | KIANNC[330]IFIVIHR                                                                                                                                    | 1                     |
| PKDRE_HUMAN (Q9NTG1) Polycystic kidney disease and receptor for egg jelly-related protein precursor (PKD and REJ homolog) [MASS=255447]                                                                                        | 0.21 | 1.86  | 0.54 | 0.00 | 1 | 2 | 3<br>3                | LSC[330]C[339]LAMLLSLLC[339]NIM[147]FFNLNR<br>QPVYEESDEVEAM[147]TYLC[330]R                                                                            | 1<br>1                |
| PKHA5_HUMAN (Q9HAU0) Pleckstrin homology domain-containing family A member 5 (Phosphoinositol 3-phosphate-binding protein 2) (PEPP-2) [MASS=127463]                                                                            | 0.00 | 8.69  | 0.24 | 0.00 | 1 | 5 | 2<br>2<br>3<br>3<br>3 | SLSPSESSASPVPSTQQLTEGSHFMC[330]V<br>TYYFC[330]TDTGKEM[147]ELWM[147]K<br>M[147]TVEEQMERIRR<br>KTENISYEMLFEPENGVNSVEM[147]MDK<br>TLSQDEGRGTYK           | 1<br>1<br>1<br>1<br>1 |
| PKHB1_HUMAN (Q9UF11) Pleckstrin homology domain-containing family B member 1 (Pleckstrin homology domain retinal protein 1) (PH domain-containing protein in retina 1) (PHRET1) [MASS=27186]                                   | 0.37 | 5.76  | 0.64 | 0.00 | 1 | 1 | 2                     | IGPEC[339]HDVQPPEGR                                                                                                                                   | 1                     |
| PKHD1_HUMAN (Q8TCZ9) Polycystic kidney and hepatic disease 1 precursor (Fibrocystin) (Polyductin) (Tigmin) [MASS=446699]                                                                                                       | 0.00 | 2.53  | 1.00 | 0.00 | 1 | 5 | 2<br>2<br>2<br>2<br>3 | PFQGRAQITLYGSSYSTPFFPYGVK<br>QKQM[147]GFANM[147]SVVLQQFAVMPR<br>DM[147]GARVIVQSFPEEPSQVQLK<br>C[330]TYQFLMQGFIC[339]K<br>RWELMVSNTTFVNFDLINC[339]VAIR | 1<br>1<br>1<br>1<br>1 |
| PKP1_HUMAN (Q13835) Plakophilin-1 (Band-6 protein) (B6P) [MASS=82860]                                                                                                                                                          | *    | 10.04 | *    | *    | * | 4 | 3<br>3<br>3<br>2      | QQVYQLGGIC[330]KLVDLLR<br>DATLEAC[330]AGALQNLTASKGLMSSGMSQLIGLKEK<br>RQNGIREAVSLLR<br>C[339]PVRPPSC[339]ASK                                           | 1<br>1<br>1<br>1      |
| PLAP_HUMAN (Q9Y263) Phospholipase A-2-activating protein (PLAP) (PLA2P) [MASS=87157]                                                                                                                                           | 0.00 | 10.69 | 1.77 | 0.00 | 1 | 3 | 3<br>2<br>3           | PANQLLALRTFC[330]NC[330]FVGQAGQKLM[147]MSQR<br>ILSLIC[339]NSSSEKPTVQQLQILWK<br>C[330]M[147]M[147]TLQGHTAAVWAVKILPEQGLM[147]LTGSADKTVK                 | 1<br>1<br>1           |
| PLCB2_HUMAN (Q00722) 1-phosphatidylinositol-4,5-bisphosphate phosphodiesterase beta 2 (EC 3.1.4.11) (Phosphoinositide phospholipase C) (Phospholipase C-beta-2) (PLC-beta-2) [MASS=133679]                                     | 0.00 | 5.93  | 2.05 | 0.00 | 1 | 5 | 2<br>2<br>2<br>2<br>2 | GQLSPEGMVWFLC[339]GPENSVLAQDK<br>VKAYLSQGER<br>TKLSPSTNSINPVWK<br>SFLM[147]SLC[330]PR<br>NFFQM[147]FPADRKR                                            | 1<br>1<br>1<br>1<br>1 |

|                                                                                                                                                                                                                                             |      |       |   |   |   |   |   |                                            |   |
|---------------------------------------------------------------------------------------------------------------------------------------------------------------------------------------------------------------------------------------------|------|-------|---|---|---|---|---|--------------------------------------------|---|
| PLEC1_HUMAN (Q15149) Plectin-1 (PLTN) (PCN) (Hemidesmosomal protein 1) (HD1) [MASS=531733]                                                                                                                                                  | *    | 2.13  | * | * | * | 5 | 2 | LKAGVAAPATQVAQVTLQSVQRR                    | 1 |
|                                                                                                                                                                                                                                             |      |       |   |   |   |   | 2 | VPLDEALQR                                  | 1 |
|                                                                                                                                                                                                                                             |      |       |   |   |   |   | 3 | DLGVTRLLDPEDVDVPQPDEK                      | 1 |
|                                                                                                                                                                                                                                             |      |       |   |   |   |   | 3 | GIYQSLEGAVQAGQLKVPVPPGYHPLDVEK             | 1 |
|                                                                                                                                                                                                                                             |      |       |   |   |   |   | 2 | GLFDEEM[147]NEILTDPSDDTK                   | 1 |
| PLOD3_HUMAN (O60568) Procollagen-lysine,2-oxoglutarate 5-dioxygenase 3 precursor (EC 1.14.11.4) (Lysyl hydroxylase 3) (LH3) [MASS=84785]                                                                                                    | *    | 1.08  | * | * | * | 1 | 2 | PDEQPSLR                                   | 1 |
| PLP2_HUMAN (Q04941) Proteolipid protein 2 (Intestinal membrane A4 protein) (Differentiation-dependent protein A4) (Proteolipid protein 2) [MASS=16691]                                                                                      | *    | 13.82 | * | * | * | 1 | 3 | MADSERLSAPGC[339]WAAC[330]TNFSR            | 1 |
| PLXA1_HUMAN (Q9UIW2) Plexin-A1 precursor (Semaphorin receptor NOV) [MASS=211086]                                                                                                                                                            | *    | 1.37  | * | * | * | 2 | 3 | YM[147]FDLDEQADK                           | 1 |
|                                                                                                                                                                                                                                             |      |       |   |   |   |   | 3 | IRKILVDLSNPGGR                             | 2 |
| PLXA4_HUMAN (Q9HCM2) Plexin-A4 precursor [MASS=212454]                                                                                                                                                                                      | *    | 4.65  | * | * | * | 5 | 3 | SPSYIVC[330]NTTSSDEVLEMK                   | 1 |
|                                                                                                                                                                                                                                             |      |       |   |   |   |   | 3 | DLEVPGYRQERVEK                             | 2 |
|                                                                                                                                                                                                                                             |      |       |   |   |   |   | 2 | QRSFVTFR                                   | 1 |
|                                                                                                                                                                                                                                             |      |       |   |   |   |   | 2 | QPC[330]LFHRRSPSYIVC[339]NTTSSDEVLEM[147]K | 1 |
|                                                                                                                                                                                                                                             |      |       |   |   |   |   | 3 | GLKLFAQLINNKVFLSFIR                        | 1 |
| PLXB3_HUMAN (Q9ULL4) Plexin-B3 precursor [MASS=206846]                                                                                                                                                                                      | *    | 2.20  | * | * | * | 2 | 3 | QALRDYQKVLVQLESLETGVGDQC[339]R             | 1 |
|                                                                                                                                                                                                                                             |      |       |   |   |   |   | 2 | VLVQLESLETGVGDQC[339]R                     | 1 |
| PLXD1_HUMAN (Q9Y4D7) Plexin-D1 precursor [MASS=212094]                                                                                                                                                                                      | *    | 1.25  | * | * | * | 2 | 2 | AIEPLSGPLDGGTLLTIR                         | 1 |
|                                                                                                                                                                                                                                             |      |       |   |   |   |   | 1 | PPLAVK                                     | 1 |
| PMS2_HUMAN (P54278) PMS1 protein homolog 2 (DNA mismatch repair protein PMS2) [MASS=95797]                                                                                                                                                  | *    | 1.62  | * | * | * | 1 | 3 | VVPLDFSM[147]SSLAKR                        | 1 |
| PO5F1_HUMAN (Q01860) POU domain, class 5, transcription factor 1 (Octamer-binding transcription factor 3) (Oct-3) (Oct-4) [MASS=38570]                                                                                                      | 0.00 | 5.00  | * | * | * | 1 | 2 | VFSQTTIC[339]RFEALQLSFK                    | 1 |
| POK10_HUMAN (P10266) HERV-K_5q33.3 provirus ancestral Pol protein (HERV-K10 Pol protein) (HERV-K107 Pol protein) [Includes: Reverse transcriptase (RT) (EC 2.7.7.49); Ribonuclease H (EC 3.1.26.4) (RNase H); Integrase (IN)] [MASS=114826] | *    | 4.04  | * | * | * | 2 | 2 | EIKLVEEKIQSAQINR                           | 1 |
|                                                                                                                                                                                                                                             |      |       |   |   |   |   | 2 | DKLIDC[330]YTFLQAEVANAGLAIASDK             | 1 |

|                                                                                                                                                                                                                |      |       |      |      |   |   |                  |                                                                                                                                                |                  |
|----------------------------------------------------------------------------------------------------------------------------------------------------------------------------------------------------------------|------|-------|------|------|---|---|------------------|------------------------------------------------------------------------------------------------------------------------------------------------|------------------|
| PP1A_HUMAN (P62136) Serine/threonine-protein phosphatase PP1-alpha catalytic subunit (EC 3.1.3.16) (PP-1A) [MASS=37512]                                                                                        | *    | 6.36  | *    | *    | * | 1 | 2                | LLEVQGSRPGKNVQLTENEIR                                                                                                                          | 1                |
| PP2AA_HUMAN (P67775) Serine/threonine-protein phosphatase 2A catalytic subunit alpha isoform (EC 3.1.3.16) (PP2A-alpha) (Replication protein C) (RP-C) [MASS=35594]                                            | 0.82 | 4.53  | 1.44 | 0.00 | 1 | 1 | 2                | NVVTIFSAPNYC[339]YR                                                                                                                            | 1                |
| PP2BA_HUMAN (Q08209) Serine/threonine-protein phosphatase 2B catalytic subunit alpha isoform (EC 3.1.3.16) (Calmodulin-dependent calcineurin A subunit alpha isoform) (CAM-PRP catalytic subunit) [MASS=58687] | 0.00 | 5.76  | 0.84 | 0.00 | 1 | 2 | 2<br>3           | HLTEYFTFKQEC[339]K<br>GLTPTGM[147]LPSGVLSSGGK                                                                                                  | 1<br>1           |
| PPARB_HUMAN (Q03181) Peroxisome proliferator-activated receptor delta (PPAR-delta) (PPAR-beta) (Nuclear hormone receptor 1) (NUC1) (NUC1) [MASS=49903]                                                         | 0.00 | 4.54  | 2.73 | 0.00 | 1 | 1 | 3                | C[339]QYC[339]RFQKC[339]LALGM[147]SHNAIR                                                                                                       | 1                |
| PPCKC_HUMAN (P35558) Phosphoenolpyruvate carboxykinase, cytosolic [GTP] (EC 4.1.1.32) (Phosphoenolpyruvate carboxylase) (PEPCK-C) [MASS=69194]                                                                 | *    | 17.04 | *    | *    | * | 4 | 3<br>3<br>3<br>3 | EVEDIEKYLEQVNADLPC[330]EIEREILALK<br>YLAAAFPSAC[339]GKTNLAM[147]MNPSPGKWK<br>GRTMYVIPFSM[147]GPLGSPLSKIGIELDSPYVVASM[147]JR<br>DTVPIPKTGLSQLGR | 1<br>1<br>1<br>1 |
| PPIA_HUMAN (P62937) Peptidyl-prolyl cis-trans isomerase A (EC 5.2.1.8) (PPlase A) (Rotamase A) (Cyclophilin A) (Cyclosporin A-binding protein) [MASS=17881]                                                    | 1.00 | 42.68 | 0.69 | 0.21 | 3 | 4 | 3<br>2<br>2<br>2 | HTGPGILSM[147]ANAGPNTNGSQFFIC[330]TAK<br>IIPGFMC[330]QGGDFTR<br>KITIADC[330]GQLE<br>ALSTGEKGFYKGGSC[339]FHR                                    | 1<br>1<br>1<br>1 |
| PPID_HUMAN (Q08752) 40 kDa peptidyl-prolyl cis-trans isomerase (EC 5.2.1.8) (PPlase) (Rotamase) (Cyclophilin-40) (CYP-40) (Cyclophilin-related protein) [MASS=40632]                                           | *    | 4.34  | *    | *    | * | 1 | 2                | LQPIALSC[339]VLNIGAC[330]K                                                                                                                     | 1                |
| PPIP1_HUMAN (O43586) Proline-serine-threonine phosphatase-interacting protein 1 (PEST phosphatase-interacting protein 1) (CD2-binding protein 1) (H-PIP) [MASS=47591]                                          | *    | 2.88  | *    | *    | * | 1 | 1                | ISANGHQKQVEK                                                                                                                                   | 1                |
| PRA10_HUMAN (O60809) PRAME family member 10 (Fragment) [MASS=53385]                                                                                                                                            | *    | 5.88  | *    | *    | * | 2 | 1<br>2           | FAPYLSQMSNLR<br>EVFPLMFM[147]EAFSM[147]RR                                                                                                      | 1<br>1           |



|                                                                                                                                                                                                                                                                             |      |       |      |      |   |   |   |                                       |   |
|-----------------------------------------------------------------------------------------------------------------------------------------------------------------------------------------------------------------------------------------------------------------------------|------|-------|------|------|---|---|---|---------------------------------------|---|
| PRA12_HUMAN (O95522) PRAME family member DJ1198H6.2 [MASS=54663]                                                                                                                                                                                                            | *    | 2.28  | *    | *    | * | 1 | 2 | QRKGLLHVC[339]C[330]K                 | 1 |
| PRAM4_HUMAN (O60810) PRAME family member 4 [MASS=55466]                                                                                                                                                                                                                     | 0.00 | 9.00  | 0.43 | 0.00 | 1 | 2 | 3 | DQALAM[147]STLEELPTELPPLFM[147]EAFSRR | 1 |
|                                                                                                                                                                                                                                                                             |      |       |      |      |   |   | 2 | RILFC[330]TDYC[330]PDC[330]GNR        | 1 |
|                                                                                                                                                                                                                                                                             |      |       |      |      |   |   | 3 | RSEVLAEEESIVC[339]LQKALNHLR           | 2 |
| PRC1_HUMAN (O43663) Protein regulator of cytokinesis 1 [MASS=71664]                                                                                                                                                                                                         | *    | 5.48  | *    | *    | * | 2 | 2 | FM[147]EYVAEQWEM[147]HR               | 1 |
| PRD13_HUMAN (Q9H4Q3) PR domain zinc finger protein 13 (PR domain-containing protein 13) [MASS=75059]                                                                                                                                                                        | 0.00 | 5.16  | 4.71 | 0.00 | 1 | 2 | 3 | C[339]LLAGDPPPPPPGLPC[339]SGALR       | 1 |
|                                                                                                                                                                                                                                                                             |      |       |      |      |   |   | 2 | TGHLC[330]LYC[330]GKLYSRK             | 1 |
| PRD15_HUMAN (P57071) PR domain zinc finger protein 15 (PR domain-containing protein 15) (Zinc finger protein 298) [MASS=169203]                                                                                                                                             | *    | 1.06  | *    | *    | * | 2 | 3 | QWTC[330]SVC[339]DKK                  | 1 |
|                                                                                                                                                                                                                                                                             |      |       |      |      |   |   | 1 | QLGEHK                                | 1 |
| PRDX3_HUMAN (P30048) Thioredoxin-dependent peroxide reductase, mitochondrial precursor (EC 1.11.1.15) (Peroxiredoxin-3) (PRX III) (Antioxidant protein 1) (AOP-1) (Protein MER5 homolog) (HBC189) [MASS=27692]                                                              | 1.00 | 9.77  | 1.75 | 0.02 | 2 | 1 | 2 | YLVLFYPLDFTFVC[339]PTEIVAFSDK         | 1 |
|                                                                                                                                                                                                                                                                             |      |       |      |      |   |   | 2 | YLVLFYPLDFTFVC[330]PTEIVAFSDK         | 1 |
| PRDX5_HUMAN (P30044) Peroxiredoxin-5, mitochondrial precursor (EC 1.11.1.15) (Prx-V) (Peroxisomal antioxidant enzyme) (PLP) (Thioredoxin reductase) (Thioredoxin peroxidase PMP20) (Antioxidant enzyme B166) (AOEB166) (TPx type VI) (Liver tissue 2D-page spo [MASS=22026] | 0.00 | 9.81  | 0.28 | 0.00 | 1 | 1 | 3 | GVQVVAC[330]LSVNDAFVTGEWGR            | 1 |
| PRELP_HUMAN (P51888) Prolargin precursor (Proline-arginine-rich end leucine-rich repeat protein) [MASS=43810]                                                                                                                                                               | 0.00 | 16.49 | 1.65 | 0.00 | 1 | 3 | 3 | NLM[147]QLNLAHNILR                    | 1 |
|                                                                                                                                                                                                                                                                             |      |       |      |      |   |   | 2 | IDQRVLEKLPGLVFLYMEK                   | 1 |
|                                                                                                                                                                                                                                                                             |      |       |      |      |   |   | 3 | INGTQIC[339]PNDLVAFHDFSSDLENVPHLRYLR  | 1 |
| PRI1_HUMAN (P49642) DNA primase small subunit (EC 2.7.7.-) (DNA primase 49 kDa subunit) (p49) [MASS=49902]                                                                                                                                                                  | 0.00 | 5.95  | *    | *    | * | 2 | 3 | M[147]ETFDPTLPELLKLYYR                | 1 |
|                                                                                                                                                                                                                                                                             |      |       |      |      |   |   | 2 | SDLQKDF                               | 1 |
| PRI2_HUMAN (P49643) DNA primase large subunit (EC 2.7.7.-) (DNA primase 58 kDa subunit) (p58) [MASS=58806]                                                                                                                                                                  | 0.38 | 9.04  | 0.85 | 0.00 | 1 | 3 | 2 | ISLDQIDLLSTKSFPPC[330]M[147]R         | 1 |
|                                                                                                                                                                                                                                                                             |      |       |      |      |   |   | 2 | RWFIQQEM[147]DLLR                     | 1 |
|                                                                                                                                                                                                                                                                             |      |       |      |      |   |   | 3 | DIKKEPIQPETPQPK                       | 1 |
| PROF4_HUMAN (Q8NHR9) Profilin-4 (Profilin IV) [MASS=14319]                                                                                                                                                                                                                  | 0.00 | 13.18 | 0.92 | 0.00 | 1 | 1 | 2 | SLC[339]VASPGFNVTPSDVR                | 1 |

|                                                                                                                                                                                                                          |      |      |      |      |   |   |   |                                                |   |
|--------------------------------------------------------------------------------------------------------------------------------------------------------------------------------------------------------------------------|------|------|------|------|---|---|---|------------------------------------------------|---|
| PRP31_HUMAN (Q8WWY3) U4/U6 small nuclear ribonucleoprotein Prp31 (Pre-mRNA-processing factor 31) (U4/U6 snRNP 61 kDa protein) (hPrp31) (Protein 61K) (Serologically defined breast cancer antigen NY-BR-99) [MASS=55456] | *    | 1.80 | *    | *    | * | 1 | 1 | KAARLVAAK                                      | 1 |
| PRS23_HUMAN (O95084) Serine protease 23 precursor (EC 3.4.21.-) (Putative secreted protein ZSIG13) [MASS=43001]                                                                                                          | 0.00 | 3.39 | 0.73 | 0.00 | 1 | 1 | 2 | LEVSSSC[330]GPQC[330]HK                        | 1 |
| PTC1_HUMAN (Q13635) Protein patched homolog 1 (PTC1) (PTC) [MASS=160560]                                                                                                                                                 | 0.00 | 1.24 | 0.95 | 0.00 | 1 | 1 | 2 | VASGYLLMLAYAC[339]LTMLR                        | 1 |
| PTN14_HUMAN (Q15678) Tyrosine-protein phosphatase non-receptor type 14 (EC 3.1.3.48) (Protein-tyrosine phosphatase pez) [MASS=135238]                                                                                    | *    | 4.63 | *    | *    | * | 4 | 2 | EQGPPEEGSGSHEVPQLPQYHHK                        | 1 |
|                                                                                                                                                                                                                          |      |      |      |      |   |   | 2 | IREVVPEENR                                     | 1 |
|                                                                                                                                                                                                                          |      |      |      |      |   |   | 3 | SLHLPMARRNTRLR                                 | 1 |
|                                                                                                                                                                                                                          |      |      |      |      |   |   | 2 | MPFGLKLR                                       | 1 |
| PTPR2_HUMAN (Q92932) Receptor-type tyrosine-protein phosphatase N2 precursor (EC 3.1.3.48) (R-PTP-N2) (Islet cell autoantigen-related protein) (ICAAR) (IAR) (Phogrin) [MASS=111281]                                     | *    | 4.53 | *    | *    | * | 2 | 3 | YSREGGAALANALRR                                | 1 |
|                                                                                                                                                                                                                          |      |      |      |      |   |   | 3 | GRQLPGRLGC[330]LLEEGLC[330]GASEAC[330]VNDGVFGR | 1 |
| PTPRK_HUMAN (Q15262) Receptor-type tyrosine-protein phosphatase kappa precursor (EC 3.1.3.48) (Protein-tyrosine phosphatase kappa) (R-PTP-kappa) [MASS=162087]                                                           | 0.00 | 1.11 | 0.72 | 0.00 | 1 | 1 | 2 | SGM[147]FC[330]AIGIVVEM[147]VKR                | 1 |
| PTPRM_HUMAN (P28827) Receptor-type tyrosine-protein phosphatase mu precursor (EC 3.1.3.48) (Protein-tyrosine phosphatase mu) (R-PTP-mu) [MASS=163632]                                                                    | *    | 0.83 | *    | *    | * | 1 | 2 | QEMTMVNSM[147]DK                               | 1 |
| PTPRZ_HUMAN (P23471) Receptor-type tyrosine-protein phosphatase zeta precursor (EC 3.1.3.48) (R-PTP-zeta) [MASS=254528]                                                                                                  | 0.89 | 2.33 | 0.43 | 0.00 | 1 | 3 | 2 | KYPTC[330]NSPK                                 | 1 |
|                                                                                                                                                                                                                          |      |      |      |      |   |   | 3 | VISTPPTPIFISDDVGAIIK                           | 1 |
|                                                                                                                                                                                                                          |      |      |      |      |   |   | 3 | ITFHWGKC[339]NM[147]SSDGSEHSLEGQK              | 1 |
| PUR4_HUMAN (O15067) Phosphoribosylformylglycinamide synthase (EC 6.3.5.3) (FGAM synthase) (FGAMS) (Formylglycinamide ribotide amidotransferase) (FGARAT) (Formylglycinamide ribotide synthetase) [MASS=144663]           | 0.00 | 2.69 | 0.15 | 1.40 | 2 | 3 | 3 | RIVLDDREC[330]PVR                              | 2 |
|                                                                                                                                                                                                                          |      |      |      |      |   |   | 2 | WASVRVGPALM[147]LR                             | 1 |
|                                                                                                                                                                                                                          |      |      |      |      |   |   | 2 | DSL SMAAR                                      | 1 |

|                                                                                                                                                                                                   |      |       |      |      |   |   |   |                                               |   |
|---------------------------------------------------------------------------------------------------------------------------------------------------------------------------------------------------|------|-------|------|------|---|---|---|-----------------------------------------------|---|
| PYGB_HUMAN (P11216) Glycogen phosphorylase, brain form (EC 2.4.1.1) [MASS=96564]                                                                                                                  | *    | 4.99  | *    | *    | * | 2 | 2 | IGEEFLDLSQLKK                                 | 1 |
|                                                                                                                                                                                                   |      |       |      |      |   |   | 3 | TC[330]AYTNHTVLPEALERWPVSM[147]FEKLLPR        | 2 |
| PYR1_HUMAN (P27708) CAD protein [Includes: Glutamine-dependent carbamoyl-phosphate synthase (EC 6.3.5.5); Aspartate carbamoyltransferase (EC 2.1.3.2); Dihydroorotase (EC 3.5.2.3)] [MASS=242982] | *    | 4.40  | *    | *    | * | 5 | 2 | ALRM[147]VDENC[339]VGF DHTVK                  | 1 |
|                                                                                                                                                                                                   |      |       |      |      |   |   | 3 | NERPDGVLLTFGGQTALNC[339]GVELTK                | 1 |
|                                                                                                                                                                                                   |      |       |      |      |   |   | 1 | MKRIIAHAQLLEQHR                               | 1 |
|                                                                                                                                                                                                   |      |       |      |      |   |   | 2 | VHVDC[330]M[147]TSQKLVR                       | 1 |
|                                                                                                                                                                                                   |      |       |      |      |   |   | 3 | KWPQGA VPQLPPSAPATSEM TTTPERPR                | 1 |
| PZP_HUMAN (P20742) Pregnancy zone protein precursor [MASS=163835]                                                                                                                                 | 0.57 | 2.56  | 2.74 | 0.00 | 1 | 3 | 2 | M[147]LERSSSVSR                               | 1 |
|                                                                                                                                                                                                   |      |       |      |      |   |   | 1 | EILNSLDK                                      | 1 |
|                                                                                                                                                                                                   |      |       |      |      |   |   | 2 | TFSSM[147]TJC[339]ASGANVSEQLSLK               | 1 |
| RA6I1_HUMAN (Q6IQ26) Rab6-interacting protein 1 (Rab6IP1) [MASS=147094]                                                                                                                           | *    | 4.12  | *    | *    | * | 3 | 2 | DPVLRVFDSRVDK                                 | 1 |
|                                                                                                                                                                                                   |      |       |      |      |   |   | 2 | RKSDASSLM[147]PPLR                            | 1 |
|                                                                                                                                                                                                   |      |       |      |      |   |   | 3 | YPENVEWNPFDQDAVGM[147]LC[330]M[147]PKGLAFK    | 1 |
| RAB38_HUMAN (P57729) Ras-related protein Rab-38 (Antigen NY-MEL-1) [MASS=23712]                                                                                                                   | 0.00 | 9.00  | 1.34 | 0.00 | 1 | 1 | 3 | MDQFC[339]KEHG FVGWFETSAK                     | 1 |
| RAC1_HUMAN (P63000) Ras-related C3 botulinum toxin substrate 1 precursor (p21-Rac1) (Ras-like protein TC25) [MASS=21450]                                                                          | 1.00 | 12.50 | 0.70 | 0.10 | 2 | 2 | 2 | HHC[330]PNTPIILVGTK                           | 1 |
|                                                                                                                                                                                                   |      |       |      |      |   |   | 2 | AVLC[330]PPPVKK                               | 1 |
| RAD9B_HUMAN (Q6WBX8) Cell cycle checkpoint control protein RAD9B homolog (RAD9 homolog B) (hRAD9B) [MASS=46392]                                                                                   | *    | 10.63 | *    | *    | * | 2 | 3 | AVQALSRSIDDEFWLDPSK                           | 1 |
|                                                                                                                                                                                                   |      |       |      |      |   |   | 3 | PLALSIDDM[147]LVEANFILATLADEQSR               | 1 |
| RAG1_HUMAN (P15918) V(D)J recombination-activating protein 1 (RAG-1) (RING finger protein 74) [MASS=119115]                                                                                       | 0.00 | 4.70  | 0.36 | 0.00 | 1 | 2 | 3 | SISC[330]QIC[339]EHILADPVETNC[339]KHFVC[330]R | 1 |
|                                                                                                                                                                                                   |      |       |      |      |   |   | 3 | AFADKEEGDVKSVC[339]M[147]TLFLLALR             | 1 |
| RAI14_HUMAN (Q9P0K7) Ankyrin repeat and coiled-coil structure-containing protein (Retinoic acid-induced protein 14) (Novel retinal pigment epithelial cell protein) [MASS=110041]                 | 0.22 | 5.00  | 2.06 | 0.00 | 1 | 3 | 1 | EVEVAKLEK                                     | 1 |
|                                                                                                                                                                                                   |      |       |      |      |   |   | 2 | M[147]HLLYAVQGQM[147]DEDVQKVLK                | 1 |
|                                                                                                                                                                                                   |      |       |      |      |   |   | 3 | TALMLAC[330]EIGSSNAVEALIK                     | 1 |
| RAI1_HUMAN (Q7Z5J4) Retinoic acid-induced protein 1 [MASS=203351]                                                                                                                                 | *    | 4.62  | *    | *    | * | 5 | 3 | PESVSTC[330]SVTSPDDMSTK                       | 1 |
|                                                                                                                                                                                                   |      |       |      |      |   |   | 2 | SAFM[147]APVPTKKR                             | 1 |
|                                                                                                                                                                                                   |      |       |      |      |   |   | 3 | RRQQQVLPDPAEPEIR                              | 1 |
|                                                                                                                                                                                                   |      |       |      |      |   |   | 3 | RKSAFMAPVPTK                                  | 1 |
|                                                                                                                                                                                                   |      |       |      |      |   |   | 3 | M[147]C[330]TRSLTALSEPRTGPPGLTTTPAPPK         | 1 |

|                                                                                                                                                                                                                                 |      |       |      |      |   |   |   |                                                        |   |
|---------------------------------------------------------------------------------------------------------------------------------------------------------------------------------------------------------------------------------|------|-------|------|------|---|---|---|--------------------------------------------------------|---|
| RAPSN_HUMAN (Q13702) 43 kDa receptor-associated protein of the synapse (RAPsyn) (Acetylcholine receptor-associated 43 kDa protein) (43 kDa postsynaptic protein) [MASS=46197]                                                   | *    | 19.46 | *    | *    | * | 4 | 2 | VC[330]C[330]SLGSFYAQVKDYEK                            | 1 |
|                                                                                                                                                                                                                                 |      |       |      |      |   |   | 3 | AM[147]SQYHM[147]AVAYRLLGRLGSAM[147]EC[339]C[330]EESMK | 1 |
|                                                                                                                                                                                                                                 |      |       |      |      |   |   | 3 | LGSAMEC[330]C[330]EESMKIALQHGD                         | 1 |
|                                                                                                                                                                                                                                 |      |       |      |      |   |   | 3 | YAHNDDAM[147]LEC[339]R                                 | 1 |
| RASF4_HUMAN (Q9H2L5) Ras association domain-containing protein 4 [MASS=36748]                                                                                                                                                   | 0.00 | 14.02 | 0.25 | 0.00 | 1 | 2 | 2 | EEEEEREIILKLTM[147]K                                   | 1 |
|                                                                                                                                                                                                                                 |      |       |      |      |   |   | 3 | ILHGPC[330]EKIARIFLMEADLGVEVPHEVAQYIK                  | 1 |
| RBBP8_HUMAN (Q99708) Retinoblastoma-binding protein 8 (RBBP-8) (CtBP-interacting protein) (CtIP) (Retinoblastoma-interacting protein and myosin-like) (RIM) [MASS=101967]                                                       | *    | 2.01  | *    | *    | * | 1 | 2 | SDHGGC[339]ELASVLQLNPC[330]R                           | 1 |
| RBL2_HUMAN (Q08999) Retinoblastoma-like protein 2 (130 kDa retinoblastoma-associated protein) (PRB2) (P130) (RBR-2) [MASS=128356]                                                                                               | 0.00 | 2.63  | 0.61 | 0.00 | 1 | 2 | 3 | GDLIQFYNNIYKQIK                                        | 1 |
|                                                                                                                                                                                                                                 |      |       |      |      |   |   | 2 | DSKPSSDPPC[330]IIEK                                    | 1 |
| RBM4B_HUMAN (Q9BQ04) RNA-binding protein 4B (RNA-binding motif protein 4B) (RNA-binding protein 30) (RNA-binding motif protein 30) [MASS=40149]                                                                                 | 0.00 | 11.42 | 0.35 | 0.00 | 1 | 2 | 3 | AAAM[147]LPTVGEYGYGPESELSQASAATR                       | 1 |
|                                                                                                                                                                                                                                 |      |       |      |      |   |   | 3 | TAPGM[147]GDQSGC[330]YR                                | 1 |
| RBM4_HUMAN                                                                                                                                                                                                                      | 0.00 | 7.69  | *    | *    | * | 1 | 2 | ATAPVPTVGEYGYGHESELSQASAAAR                            | 1 |
| RBP2_HUMAN (P49792) Ran-binding protein 2 (RanBP2) (Nuclear pore complex protein Nup358) (Nucleoporin Nup358) (358 kDa nucleoporin) (P270) [MASS=358197]                                                                        | 0.00 | 0.53  | 0.42 | 0.00 | 1 | 1 | 2 | HGLQPALLVHWAEC[330]LQK                                 | 1 |
| RBPSL_HUMAN (Q9UBG7) Recombining binding protein suppressor of hairless-like protein (Transcription factor RBP-L) [MASS=56594]                                                                                                  | 0.00 | 3.29  | 1.52 | 0.00 | 1 | 1 | 2 | RFFC[339]PPPC[339]VYLSGPGWR                            | 1 |
| RCBT2_HUMAN (O95199) RCC1 and BTB domain-containing protein 2 (Regulator of chromosome condensation and BTB domain-containing protein 2) (Chromosome condensation 1-like) (CHC1-L) (RCC1-like G exchanging factor) [MASS=60315] | *    | 1.81  | *    | *    | * | 1 | 2 | PVQATLSSLK                                             | 1 |
| RECQ1_HUMAN (P46063) ATP-dependent DNA helicase Q1 (EC 3.6.1.-) (DNA-dependent ATPase Q1) [MASS=73456]                                                                                                                          | *    | 3.54  | *    | *    | * | 1 | 3 | FVIHHSMSKSMENYYQESGRAGR                                | 1 |

|                                                                                                                                                                                                             |      |       |      |      |   |   |                  |                                                                                                   |                  |
|-------------------------------------------------------------------------------------------------------------------------------------------------------------------------------------------------------------|------|-------|------|------|---|---|------------------|---------------------------------------------------------------------------------------------------|------------------|
| RECQ5_HUMAN (O94762) ATP-dependent DNA helicase Q5 (EC 3.6.1.-) (RecQ protein-like 5) (RecQ5) [MASS=108858]                                                                                                 | *    | 5.65  | *    | *    | * | 2 | 3                | EAC[330]EQLAIELSC[339]RGNVNAKAYHAGLK<br>SRLGHAPC[339]VALTATATPQVQEDVFAALHLKK                      | 1<br>1           |
| RED2_HUMAN (Q9NS39) Double-stranded RNA-specific editase B2 (EC 3.5.-.-) (dsRNA adenosine deaminase B2) (RNA-dependent adenosine deaminase 3) (RNA-editing deaminase 2) (RNA-editing enzyme 2) [MASS=80621] | 0.59 | 3.11  | *    | *    | * | 1 | 3                | GQAAQAALQELFDIQMPGHAPGR                                                                           | 1                |
| REL1_HUMAN (P04808) Prorelaxin H1 precursor [Contains: Relaxin B chain; Relaxin A chain] [MASS=21146]                                                                                                       | 0.00 | 7.57  | 2.27 | 0.00 | 1 | 1 | 2                | AQIAIC[339]GMSTWSKR                                                                               | 1                |
| RENT2_HUMAN (Q9HAU5) Regulator of nonsense transcripts 2 (Nonsense mRNA reducing factor 2) (Up-frameshift suppressor 2 homolog) (hUpf2) [MASS=147809]                                                       | *    | 3.07  | *    | *    | * | 3 | 2<br>2<br>2      | MPAERKK<br>LC[339]NSLEESIRQVQDLEREFLLIK<br>TSVLLEQM[147]MR                                        | 1<br>1<br>1      |
| RGS14_HUMAN (O43566) Regulator of G-protein signaling 14 (RGS14) [MASS=64600]                                                                                                                               | *    | 2.36  | *    | *    | * | 1 | 3                | ATHPPPASPSSLVK                                                                                    | 1                |
| RGS3_HUMAN (P49796) Regulator of G-protein signaling 3 (RGS3) (RGP3) [MASS=132335]                                                                                                                          | 0.00 | 3.51  | 1.42 | 0.00 | 1 | 2 | 2<br>3           | NESPGAPPAGKADKM[147]MK<br>ASQSRQSGLLIGC[339]MSFGVKSLLTDPDK                                        | 1<br>1           |
| RHOA_HUMAN (P61586) Transforming protein RhoA precursor (H12) [MASS=21768]                                                                                                                                  | 0.92 | 18.65 | 1.84 | 0.00 | 1 | 2 | 1<br>3           | ELAKMK<br>LRPLSYPDTDVILMC[339]FSIDSPDSLENIPEK                                                     | 1<br>1           |
| RHOG_HUMAN (P84095) Rho-related GTP-binding protein RhoG precursor [MASS=21308]                                                                                                                             | *    | 6.28  | *    | *    | * | 1 | 2                | AVLNPTPIKGR                                                                                       | 1                |
| RHPN1_HUMAN (Q8TCX5) Rhophilin-1 (GTP-Rho-binding protein 1) [MASS=76292]                                                                                                                                   | 0.00 | 10.22 | 0.68 | 0.00 | 1 | 4 | 3<br>3<br>2<br>2 | EDDFC[330]EAAEAPDIQPKTHQK<br>TGGC[330]PQPC[330]APVKPAPPSSLKHGWP<br>AVISQTLQR<br>GSVLFNIGALHTQIGAR | 1<br>1<br>1<br>1 |
| RIMS3_HUMAN (Q9UJD0) Regulating synaptic membrane exocytosis protein 3 (Nim3) (Rab-3-interacting molecule 3) (RIM 3) (RIM3 gamma) [MASS=32796]                                                              | *    | 14.29 | *    | *    | * | 2 | 3<br>2           | MDHKC[330]FM[147]GMAQIM[147]LDELDSAAVTGWYK<br>STETGIAVEM[147]RSRVTR                               | 1<br>1           |

|                                                                                                                                                               |      |       |      |      |   |   |   |                                                                        |        |
|---------------------------------------------------------------------------------------------------------------------------------------------------------------|------|-------|------|------|---|---|---|------------------------------------------------------------------------|--------|
| RINI_HUMAN (P13489) Ribonuclease inhibitor (Ribonuclease/angiogenin inhibitor 1) (RAI) (Placental ribonuclease inhibitor) (RNase inhibitor) (RI) [MASS=49842] | 0.00 | 7.39  | 2.32 | 0.00 | 1 | 2 | 3 | QPGC[339]LLEQLVLYDIYWSEEM[147]EDR<br>2 VNPALAEINLR                     | 1<br>1 |
| RINT1_HUMAN (Q6NUQ1) RAD50-interacting protein 1 (RAD50 interactor 1) (Protein RINT-1) (HsRINT-1) [MASS=90631]                                                | 0.00 | 2.15  | 1.65 | 0.00 | 1 | 1 | 2 | EAC[339]IVLNLNVGSAALLK                                                 | 1      |
| RIOK1_HUMAN (Q9BRS2) Serine/threonine-protein kinase RIO1 (EC 2.7.11.1) (RIO kinase 1) [MASS=65583]                                                           | 0.00 | 7.75  | 2.14 | 0.00 | 1 | 2 | 3 | M[147]LTRGIITEINGC[339]ISTGKEANVYHASTANGESR<br>3 DC[339]ANVNDFFM[147]R | 2<br>1 |
| RKHD1_HUMAN (Q86XN8) RING finger and KH domain-containing protein 1 [MASS=49802]                                                                              | 0.00 | 4.74  | 0.64 | 0.00 | 1 | 1 | 3 | KSVNM[147]TEC[330]VPVPSEHVAEIVGR                                       | 1      |
| RL14_HUMAN (P50914) 60S ribosomal protein L14 (CAG-ISL 7) [MASS=23158]                                                                                        | 0.00 | 5.66  | 2.01 | 0.00 | 1 | 1 | 3 | ALVDGPC[339]TQVRR                                                      | 1      |
| RL18A_HUMAN (Q02543) 60S ribosomal protein L18a [MASS=20762]                                                                                                  | 0.98 | 4.55  | 1.02 | 0.00 | 1 | 1 | 2 | C[330]HTPPLYR                                                          | 1      |
| RL27A_HUMAN (P46776) 60S ribosomal protein L27a [MASS=16430]                                                                                                  | 0.00 | 8.16  | 1.09 | 0.00 | 1 | 1 | 2 | NQSFC[339]PTVNLDK                                                      | 1      |
| RL30_HUMAN (P62888) 60S ribosomal protein L30 [MASS=12653]                                                                                                    | *    | 26.32 | *    | *    | * | 1 | 3 | SEIEYYAMLAKTGVHHYSGNIELGTAC[339]GK                                     | 1      |
| RL3_HUMAN (P39023) 60S ribosomal protein L3 (HIV-1 TAR RNA-binding protein B) (TARBP-B) [MASS=45977]                                                          | *    | 1.49  | *    | *    | * | 1 | 1 | DFSSMK                                                                 | 1      |
| RL4_HUMAN (P36578) 60S ribosomal protein L4 (L1) [MASS=47566]                                                                                                 | 0.99 | 3.52  | 1.90 | 0.00 | 1 | 1 | 2 | RGPC[339]IINYEDNGIIK                                                   | 1      |
| RL9_HUMAN (P32969) 60S ribosomal protein L9 [MASS=21863]                                                                                                      | 0.54 | 7.29  | 0.96 | 0.00 | 1 | 1 | 2 | M[147]RPGVAC[339]SVSQAQK                                               | 1      |
| RN5A_HUMAN (Q05823) 2-5A-dependent ribonuclease (EC 3.1.26.-) (2-5A-dependent RNase) (Ribonuclease L) (RNase L) (Ribonuclease 4) [MASS=83532]                 | 0.00 | 4.18  | 0.95 | 0.00 | 1 | 1 | 3 | LLKLFLSKGADVNEC[339]DFYGFATFMEAAVYGK                                   | 1      |
| RNF17_HUMAN (Q9BXT8) RING finger protein 17 [MASS=73736]                                                                                                      | 0.00 | 5.82  | 0.86 | 0.00 | 1 | 2 | 2 | ISSDMPVSLRDALVFM[147]ELAK<br>3 YNNKKELSC[330]YDTYPPEK                  | 1<br>1 |
| ROBO3_HUMAN (Q96MS0) Roundabout homolog 3 precursor (Roundabout-like protein 3) [MASS=148208]                                                                 | 0.00 | 1.01  | 2.16 | 0.00 | 1 | 1 | 2 | RARPDEGVYTC[339]VAR                                                    | 1      |

|                                                                                                                                                                                                      |      |       |      |      |   |   |   |                                                |   |
|------------------------------------------------------------------------------------------------------------------------------------------------------------------------------------------------------|------|-------|------|------|---|---|---|------------------------------------------------|---|
| RP1_HUMAN (P56715) Oxygen-regulated protein 1 (Retinitis pigmentosa RP1 protein) (Retinitis pigmentosa 1 protein) [MASS=240660]                                                                      | *    | 1.11  | *    | *    | * | 2 | 2 | SIIFNQDGTM[147]TVEMK                           | 1 |
|                                                                                                                                                                                                      |      |       |      |      |   |   | 2 | YC[330]KSTFENK                                 | 1 |
| RPC1_HUMAN (O14802) DNA-directed RNA polymerase III largest subunit (EC 2.7.7.6) (RPC155) (RPC1) [MASS=155748]                                                                                       | *    | 6.04  | *    | *    | * | 4 | 2 | GEVLGITRFLAKMK                                 | 1 |
|                                                                                                                                                                                                      |      |       |      |      |   |   | 2 | SGTNEDDLTMKLTEIIFLNDVIKK                       | 1 |
|                                                                                                                                                                                                      |      |       |      |      |   |   | 2 | LPPPTILKPVTLWTGKQIFSVILR                       | 1 |
|                                                                                                                                                                                                      |      |       |      |      |   |   | 2 | TTIINEIQYTM[147]VVNHGMSIDR                     | 1 |
| RPC2_HUMAN (Q9NW08) DNA-directed RNA polymerase III subunit 127.6 kDa polypeptide (EC 2.7.7.6) (RNA polymerase III subunit 2) (RPC2) [MASS=127784]                                                   | *    | 7.24  | *    | *    | * | 5 | 2 | HM[147]RQDQITNGMVNAISTGNWSLK                   | 1 |
|                                                                                                                                                                                                      |      |       |      |      |   |   | 2 | VM[147]ISSNAEDAFLIKMLLR                        | 1 |
|                                                                                                                                                                                                      |      |       |      |      |   |   | 3 | GVEKVILIQEQLSKNR                               | 1 |
|                                                                                                                                                                                                      |      |       |      |      |   |   | 2 | NTYQC[339]AMGKQAM[147]GTIGYNQR                 | 1 |
|                                                                                                                                                                                                      |      |       |      |      |   |   | 1 | FKMDR                                          | 1 |
| RPC5_HUMAN (Q9NVU0) DNA-directed RNA polymerases III 80 kDa polypeptide (EC 2.7.7.6) (RNA polymerase III subunit 5) (RPC5) [MASS=79898]                                                              | 0.00 | 3.11  | 0.48 | 0.00 | 1 | 1 | 2 | KPDAQSGPAGLVC[330]GDQRIQVAK                    | 1 |
| RS16_HUMAN (P62249) 40S ribosomal protein S16 [MASS=16314]                                                                                                                                           | 1.00 | 6.21  | 1.03 | 0.00 | 2 | 1 | 2 | TATAVAHC[330]K                                 | 1 |
|                                                                                                                                                                                                      |      |       |      |      |   |   | 2 | TATAVAHC[339]K                                 | 1 |
| RS2_HUMAN (P15880) 40S ribosomal protein S2 (S4) (LLRep3 protein) [MASS=31324]                                                                                                                       | 0.97 | 14.33 | 2.09 | 0.00 | 1 | 2 | 3 | SLEEIYLFSLPIKESEIIDFFLGASLKDEVLK               | 1 |
|                                                                                                                                                                                                      |      |       |      |      |   |   | 2 | IGKPHTVPC[339]K                                | 1 |
| RS3A_HUMAN (P61247) 40S ribosomal protein S3a [MASS=29814]                                                                                                                                           | 0.99 | 13.31 | 0.94 | 0.00 | 1 | 2 | 2 | AC[339]QSIYPLHDFVFR                            | 1 |
|                                                                                                                                                                                                      |      |       |      |      |   |   | 3 | NC[330]LTNFHGM[147]DLTRDKM[147]C[330]SM[147]VK | 1 |
| RS4X_HUMAN (P62701) 40S ribosomal protein S4, X isoform (Single copy abundant mRNA protein) (SCR10) [MASS=29466]                                                                                     | 0.82 | 12.21 | 2.42 | 0.00 | 1 | 2 | 2 | FDTGNLC[339]M[147]VTGGANLGR                    | 1 |
|                                                                                                                                                                                                      |      |       |      |      |   |   | 3 | LTGVFAPRPSTGPHK                                | 1 |
| RSF1_HUMAN (Q96T23) Remodeling and spacing factor 1 (Rsf-1) (Hepatitis B virus X-associated protein) (HBV pX-associated protein 8) (p325 subunit of RSF chromatin remodelling complex) [MASS=163004] | 0.00 | 3.42  | 1.75 | 0.00 | 1 | 3 | 2 | YSSNDESESGSEK                                  | 1 |
|                                                                                                                                                                                                      |      |       |      |      |   |   | 2 | VLQAPPPDVGNGEVPK                               | 1 |
|                                                                                                                                                                                                      |      |       |      |      |   |   | 3 | YLIKIC[339]QEFNSTWAWEMEK                       | 1 |
| RSPO4_HUMAN (Q2I0M5) R-spondin-4 precursor (Roof plate-specific spondin-4) (hRspo4) [MASS=26171]                                                                                                     | 0.00 | 9.40  | 2.56 | 0.00 | 1 | 1 | 3 | MRAPLC[339]LLLLVAHAVDMLALNR                    | 1 |
| RTC1_HUMAN (O00442) RNA 3'-terminal phosphate cyclase (EC 6.5.1.4) (RNA-3'-phosphate cyclase) (RNA cyclase) [MASS=39337]                                                                             | 0.00 | 5.19  | 0.62 | 0.00 | 1 | 1 | 2 | VSTALSC[330]LLGLPLRVQKIR                       | 1 |

|                                                                                                                                                                                     |      |      |      |      |   |    |   |                                               |   |
|-------------------------------------------------------------------------------------------------------------------------------------------------------------------------------------|------|------|------|------|---|----|---|-----------------------------------------------|---|
| RUSC2_HUMAN (Q8N2Y8) RUN and SH3 domain-containing protein 2 [MASS=161194]                                                                                                          | *    | 1.72 | *    | *    | * | 1  | 2 | NPIFEFPGSLSAASHLNC[330]RLNGQAVK               | 1 |
| RYR1_HUMAN (P21817) Ryanodine receptor 1 (Skeletal muscle-type ryanodine receptor) (RyR1) (RYR-1) (Skeletal muscle calcium release channel) [MASS=565172]                           | *    | 0.12 | *    | *    | * | 1  | 1 | NTYVEK                                        | 1 |
| RYR2_HUMAN (Q92736) Ryanodine receptor 2 (Cardiac muscle-type ryanodine receptor) (RyR2) (RYR-2) (Cardiac muscle ryanodine receptor-calcium release channel) (hRYR-2) [MASS=564495] | *    | 2.15 | *    | *    | * | 5  | 3 | FLPPPGYAPC[330]YEAVLPKEKLLK                   | 1 |
|                                                                                                                                                                                     |      |      |      |      |   |    | 3 | TLLYGHAILLRHSYSGM[147]YLC[339]C[330]LSTSR     | 1 |
|                                                                                                                                                                                     |      |      |      |      |   |    | 3 | C[339]APEM[147]HLIHAGKGEAIR                   | 1 |
|                                                                                                                                                                                     |      |      |      |      |   |    | 3 | FLLGGRHGFEKFLPPPGYAPC[330]YEAVLPK             | 1 |
|                                                                                                                                                                                     |      |      |      |      |   |    | 3 | TVAGGLPGAGLFGPK                               | 1 |
| RYR3_HUMAN (Q15413) Ryanodine receptor 3 (Brain-type ryanodine receptor) (RyR3) (RYR-3) (Brain ryanodine receptor-calcium release channel) [MASS=551928]                            | 0.00 | 5.11 | 0.52 | 0.00 | 1 | 12 | 2 | RHGLPGVGLR                                    | 1 |
|                                                                                                                                                                                     |      |      |      |      |   |    | 3 | IDGTMDSPPC[330]LKVTHKTFGTQNSNADMIYC[339]R     | 2 |
|                                                                                                                                                                                     |      |      |      |      |   |    | 2 | KEGSLKHGPEVGLGDLSEIIGK                        | 1 |
|                                                                                                                                                                                     |      |      |      |      |   |    | 3 | SEDDDEPDMKC[339]DDMMTC[330]YLFHMYVGVR         | 1 |
|                                                                                                                                                                                     |      |      |      |      |   |    | 2 | SDDPAVKWQLNLYKDVLK                            | 1 |
|                                                                                                                                                                                     |      |      |      |      |   |    | 3 | M[147]ELFVNFC[330]EDTIFEM[147]QLASQISESDSADR  | 1 |
|                                                                                                                                                                                     |      |      |      |      |   |    | 3 | C[339]VDILELC[339]EQEDLMRFHYHTLR              | 1 |
|                                                                                                                                                                                     |      |      |      |      |   |    | 3 | YNELM[147]QALNM[147]SAALTARK                  | 1 |
|                                                                                                                                                                                     |      |      |      |      |   |    | 2 | TSRLGPLKR                                     | 1 |
|                                                                                                                                                                                     |      |      |      |      |   |    | 3 | ELISQTM[147]IC[339]WAQEDQIQDSELVRMM[147]FNLLR | 1 |
| S12A2_HUMAN (P55011) Solute carrier family 12 member 2 (Bumetanide-sensitive sodium-(potassium)-chloride cotransporter 1) (Basolateral Na-K-Cl symporter) [MASS=131446]             | *    | 1.90 | *    | *    | * | 1  | 2 | FGWIKGVLVRC[339]MLNIWGVMLFIR                  | 1 |
|                                                                                                                                                                                     |      |      |      |      |   |    | 2 |                                               |   |
| S12A3_HUMAN (P55017) Solute carrier family 12 member 3 (Thiazide-sensitive sodium-chloride cotransporter) (Na-Cl symporter) [MASS=113138]                                           | 0.00 | 6.86 | 0.78 | 0.00 | 1 | 3  | 3 | KGKC[330]PSSLYM[147]AWLETLSQDLR               | 1 |
|                                                                                                                                                                                     |      |      |      |      |   |    | 3 | AQVLFFLVIM[147]VSFANYLVGTLIPPSEDKASK          | 1 |
|                                                                                                                                                                                     |      |      |      |      |   |    | 2 | C[330]PSSLYMAWLETLSQDLR                       | 1 |
| S12A4_HUMAN (Q9UP95) Solute carrier family 12 member 4 (Electroneutral potassium-chloride cotransporter 1) (Erythroid K-Cl cotransporter 1) (hKCC1) [MASS=120649]                   | *    | 1.94 | *    | *    | * | 1  | 3 | GIDYYDRNLALFEEELDIRPK                         | 1 |



|                                                                                                                                                                                                                                                                             |      |       |      |      |   |   |   |                                               |   |
|-----------------------------------------------------------------------------------------------------------------------------------------------------------------------------------------------------------------------------------------------------------------------------|------|-------|------|------|---|---|---|-----------------------------------------------|---|
| S12A6_HUMAN (Q9UHW9) Solute carrier family 12 member 6 (Electroneutral potassium-chloride cotransporter 3) (K-Cl cotransporter 3) [MASS=127616]                                                                                                                             | 0.00 | 3.83  | 0.33 | 0.00 | 1 | 3 | 2 | SMEGFQDLLNMRPDQSNVRR                          | 1 |
|                                                                                                                                                                                                                                                                             |      |       |      |      |   |   | 2 | YM[147]ASRGQKAK                               | 1 |
|                                                                                                                                                                                                                                                                             |      |       |      |      |   |   | 2 | VKGFC[330]QLVVAALKR                           | 1 |
| S14L1_HUMAN (Q92503) SEC14-like protein 1 [MASS=81277]                                                                                                                                                                                                                      | 0.00 | 5.73  | 1.27 | 0.00 | 1 | 2 | 3 | RFPTC[339]PLIPM[147]FVGSDTVSEFK               | 1 |
|                                                                                                                                                                                                                                                                             |      |       |      |      |   |   | 3 | IIEVVEANYPETLGRLLILR                          | 1 |
| S23A1_HUMAN (Q9UHI7) Solute carrier family 23 member 1 (Sodium-dependent vitamin C transporter 1) (hSVCT1) (Na(+)/L-ascorbic acid transporter 1) (Yolk sac permease-like molecule 3) [MASS=64815]                                                                           | 0.00 | 4.85  | 0.90 | 0.00 | 1 | 1 | 3 | MFPIM[147]LAIM[147]TVWLLC[339]YVLTLDVLPDTPK   | 1 |
| S27A1_HUMAN (Q6PCB7) Long-chain fatty acid transport protein 1 (EC 6.2.1.-) (Fatty acid transport protein 1) (FATP-1) (Solute carrier family 27 member 1) [MASS=71108]                                                                                                      | *    | 5.57  | *    | *    | * | 1 | 3 | FC[339]SGDLGPEGILPDTHLLDPLLKEASTAPLAQIPSK     | 1 |
| S27A4_HUMAN (Q6P1M0) Long-chain fatty acid transport protein 4 (EC 6.2.1.-) (Fatty acid transport protein 4) (FATP-4) (Solute carrier family 27 member 4) [MASS=72064]                                                                                                      | *    | 9.33  | *    | *    | * | 3 | 3 | FDGYLNQGANNK                                  | 1 |
|                                                                                                                                                                                                                                                                             |      |       |      |      |   |   | 3 | DPLFYLDAQKGRYVPLDQEAYSR                       | 1 |
|                                                                                                                                                                                                                                                                             |      |       |      |      |   |   | 2 | YLLNQPPREAENQHQRVLMALGNGLR                    | 1 |
| S3TC2_HUMAN (Q8TF17) SH3 domain and tetratricopeptide repeats-containing protein 2 [MASS=144776]                                                                                                                                                                            | 0.00 | 6.21  | 3.61 | 0.00 | 1 | 4 | 2 | C[339]VNGPLQEAAR                              | 1 |
|                                                                                                                                                                                                                                                                             |      |       |      |      |   |   | 3 | LLGFSPGWGEVSALAC[339]PMLR                     | 1 |
|                                                                                                                                                                                                                                                                             |      |       |      |      |   |   | 2 | IFNKLTQLISLEGYEK                              | 1 |
|                                                                                                                                                                                                                                                                             |      |       |      |      |   |   | 3 | SLYDFSFSFLTSSFYSEDEFVAYLEASR                  | 1 |
| SAM50_HUMAN (Q9Y512) Sorting and assembly machinery component 50 homolog [MASS=51962]                                                                                                                                                                                       | 1.00 | 12.79 | 0.86 | 0.30 | 2 | 3 | 3 | LTGSYNTM[147]VGNNEGSMVLGLKLPNLLGR             | 1 |
|                                                                                                                                                                                                                                                                             |      |       |      |      |   |   | 2 | THFFLNAGNLC[339]NLNYGEGPK                     | 1 |
|                                                                                                                                                                                                                                                                             |      |       |      |      |   |   | 2 | IC[330]DGVQFGAGIR                             | 1 |
| SAMD4_HUMAN (Q9UPU9) Sterile alpha motif domain-containing protein 4 [MASS=58610]                                                                                                                                                                                           | 0.00 | 3.59  | 2.11 | 0.00 | 1 | 1 | 3 | LES LC[339]LSM[147]TEHALGDGVDR                | 1 |
| SAP_HUMAN (P07602) Proactivator polypeptide precursor [Contains: Saposin A (Protein A); Saposin B-Val; Saposin B (Sphingolipid activator protein 1) (SAP-1) (Cerebroside sulfate activator) (CSAct) (Dispersin) (Sulfatide/GM1 activator); Saposin C (Co-beta- [MASS=58112] | 1.00 | 11.26 | 2.41 | 0.04 | 8 | 4 | 2 | TEKEILDAFDK                                   | 1 |
|                                                                                                                                                                                                                                                                             |      |       |      |      |   |   | 1 | GC[339]SFLPDPYQK                              | 1 |
|                                                                                                                                                                                                                                                                             |      |       |      |      |   |   | 3 | QC[339]DQFVAEYEPVLIIEILVEVM[147]DPSFVC[339]LK | 2 |
|                                                                                                                                                                                                                                                                             |      |       |      |      |   |   | 3 | QC[330]DQFVAEYEPVLIIEILVEVMDPSFVC[330]LK      | 1 |
|                                                                                                                                                                                                                                                                             |      |       |      |      |   |   | 2 | SLPC[339]DIC[339]K                            | 1 |
|                                                                                                                                                                                                                                                                             |      |       |      |      |   |   | 2 | GC[339]SFLPDPYQK                              | 2 |
|                                                                                                                                                                                                                                                                             |      |       |      |      |   |   | 2 | GC[330]SFLPDPYQK                              | 1 |

|                                                                                                                                                                                                                                                                 |      |      |      |      |   |   |   |                                               |   |
|-----------------------------------------------------------------------------------------------------------------------------------------------------------------------------------------------------------------------------------------------------------------|------|------|------|------|---|---|---|-----------------------------------------------|---|
| SATT_HUMAN (P43007) Neutral amino acid transporter A (SATT) (Alanine/serine/cysteine/threonine transporter) (ASCT1) [MASS=55723]                                                                                                                                | 1.00 | 6.77 | 0.37 | 0.37 | 3 | 2 | 2 | C[339]IEENNGVDKR                              | 1 |
|                                                                                                                                                                                                                                                                 |      |      |      |      |   |   | 2 | M[147]IILPLVVC[330]SLVSGAASLDASC[330]LGR      | 1 |
|                                                                                                                                                                                                                                                                 |      |      |      |      |   |   | 2 | C[330]IEENNGVDKR                              | 1 |
| SC10A_HUMAN (Q9Y5Y9) Sodium channel protein type 10 subunit alpha (Sodium channel protein type X subunit alpha) (Voltage-gated sodium channel subunit alpha Nav1.8) (Peripheral nerve sodium channel 3) (hPN3) [MASS=220564]                                    | *    | 1.48 | *    | *    | * | 2 | 2 | ALRTLRLR                                      | 1 |
|                                                                                                                                                                                                                                                                 |      |      |      |      |   |   | 2 | C[330]INYTDGEFSLVPLSIVNNK                     | 1 |
| SC11A_HUMAN (Q9UI33) Sodium channel protein type 11 subunit alpha (Sodium channel protein type XI subunit alpha) (Voltage-gated sodium channel subunit alpha Nav1.9) (Sensory neuron sodium channel 2) (Peripheral nerve sodium channel 5) (hNaN) [MASS=204947] | 0.00 | 5.75 | 0.64 | 0.20 | 2 | 5 | 3 | GDQGDQNDLENGPHSPLQTLTLC[339]NGDLSSFGVAK       | 1 |
|                                                                                                                                                                                                                                                                 |      |      |      |      |   |   | 2 | FRR AFC[330]FVR                               | 1 |
|                                                                                                                                                                                                                                                                 |      |      |      |      |   |   | 1 | VHC[330]D                                     | 1 |
|                                                                                                                                                                                                                                                                 |      |      |      |      |   |   | 3 | PNKYQFLVM[147]DLPM[147]VSEDLHC[330]MDILFAFTAR | 1 |
|                                                                                                                                                                                                                                                                 |      |      |      |      |   |   | 2 | TFASSMLC[330]LFQISTSAGWDSLLSPM[147]LR         | 1 |
| SC5A1_HUMAN (P13866) Sodium/glucose cotransporter 1 (Na <sup>+</sup> )/glucose cotransporter 1 (High affinity sodium-glucose cotransporter) [MASS=73498]                                                                                                        | 0.00 | 6.33 | 0.23 | 0.00 | 1 | 2 | 2 | LM[147]PM[147]FIMVMPGM[147]ISRILYTEK          | 1 |
|                                                                                                                                                                                                                                                                 |      |      |      |      |   |   | 2 | VGC[330]TNIAYPTLVVELM[147]PNGLR               | 1 |
| SC5A3_HUMAN (P53794) Sodium/myo-inositol cotransporter (Na <sup>+</sup> )/myo-inositol cotransporter) [MASS=79693]                                                                                                                                              | 0.00 | 2.23 | 0.42 | 0.00 | 1 | 1 | 2 | C[330]SENNETINHIIPNGK                         | 1 |
| SCAR3_HUMAN (Q6AZY7) Scavenger receptor class A member 3 (Cellular stress response gene protein) [MASS=65136]                                                                                                                                                   | *    | 2.48 | *    | *    | * | 1 | 3 | GDM[147]GVKGPVGGRGPK                          | 1 |
| SCN4A_HUMAN (P35499) Sodium channel protein type 4 subunit alpha (Sodium channel protein type IV subunit alpha) (Voltage-gated sodium channel subunit alpha Nav1.4) (Sodium channel protein, skeletal muscle subunit alpha) (SkM1) [MASS=208031]                | 0.00 | 3.92 | 1.60 | 0.00 | 1 | 4 | 2 | EEEFQQMLEK                                    | 1 |
|                                                                                                                                                                                                                                                                 |      |      |      |      |   |   | 3 | EC[339]VC[330]KIALDC[339]NLPR                 | 1 |
|                                                                                                                                                                                                                                                                 |      |      |      |      |   |   | 3 | GEAGDAGPTMGLMPISPSDTAWPPAPPPGQTVRPGVK         | 1 |
|                                                                                                                                                                                                                                                                 |      |      |      |      |   |   | 2 | GFC[339]VDDFTFLR                              | 1 |
| SCN8A_HUMAN (Q9UQD0) Sodium channel protein type 8 subunit alpha (Sodium channel protein type VIII subunit alpha) (Voltage-gated sodium channel subunit alpha Nav1.6) [MASS=225279]                                                                             | 0.00 | 2.07 | 0.23 | 0.00 | 1 | 3 | 3 | EC[339]VC[330]KINQDC[330]ELPR                 | 1 |
|                                                                                                                                                                                                                                                                 |      |      |      |      |   |   | 2 | LLPEATTEVEIKK                                 | 1 |
|                                                                                                                                                                                                                                                                 |      |      |      |      |   |   | 3 | ANC[330]IANHTGADIHR                           | 1 |

|                                                                                                                                                                                                             |      |       |      |      |    |   |   |                                           |   |
|-------------------------------------------------------------------------------------------------------------------------------------------------------------------------------------------------------------|------|-------|------|------|----|---|---|-------------------------------------------|---|
| SCOT2_HUMAN (Q9BYC2) Succinyl-CoA:3-ketoacid-coenzyme A transferase 2, mitochondrial precursor (EC 2.8.3.5) (Testis-specific succinyl CoA:3-oxoacid CoA-transferase) (SCOT-t) [MASS=56140]                  | *    | 1.74  | *    | *    | *  | 1 | 2 | DNTPKIM[147]EK                            | 1 |
|                                                                                                                                                                                                             |      |       |      |      |    |   | 3 | DIPDGATVLVGGFGLC[339]GIPENLIDALLK         | 2 |
|                                                                                                                                                                                                             |      |       |      |      |    |   | 3 | GGHVDLTM[147]LGAMQVSKYGDLANWMIPGKM[147]VK | 1 |
| SCOT_HUMAN (P55809) Succinyl-CoA:3-ketoacid-coenzyme A transferase 1, mitochondrial precursor (EC 2.8.3.5) (Somatic-type succinyl CoA:3-oxoacid CoA-transferase) (Scot-S) [MASS=56157]                      | 1.00 | 16.54 | 1.33 | 0.11 | 10 | 5 | 1 | C[339]TLPLTGK                             | 1 |
|                                                                                                                                                                                                             |      |       |      |      |    |   | 2 | STGC[330]DFAVSPK                          | 1 |
|                                                                                                                                                                                                             |      |       |      |      |    |   | 2 | DIPDGATVLVGGFGLC[339]GIPENLIDALLK         | 3 |
|                                                                                                                                                                                                             |      |       |      |      |    |   | 2 | NFNLPM[147]C[339]K                        | 1 |
| SCRB1_HUMAN (Q8WTV0) Scavenger receptor class B member 1 (SRB1) (SR-BI) (CD36 antigen-like 1) (CD36 and LIMPII analogous 1) (CLA-1) (Collagen type I receptor, thrombospondin receptor-like 1) [MASS=60878] | 0.00 | 10.69 | 0.31 | 0.00 | 1  | 2 | 3 | WAAGALGVAGLLC[330]AVLGAVMIVMVPSLIK        | 2 |
|                                                                                                                                                                                                             |      |       |      |      |    |   | 3 | EIPIPFYLSVYFFDVM[147]NPSEILKGEKPQVR       | 1 |
| SCRN1_HUMAN (Q12765) Secernin-1 [MASS=46382]                                                                                                                                                                | 0.99 | 3.86  | 0.73 | 0.00 | 1  | 1 | 2 | SSPC[330]IHIFTGTPDPSR                     | 1 |
| SEHL2_HUMAN (Q9NQF3) Serine hydrolase-like protein 2 (EC 3.1.-.-) [MASS=22471]                                                                                                                              | 0.00 | 5.42  | 0.75 | 0.00 | 1  | 1 | 2 | IPSGSC[339]RPMSC[339]                     | 1 |
| SELO_HUMAN (Q9BVL4) Selenoprotein O [MASS=73442]                                                                                                                                                            | *    | 2.84  | *    | *    | *  | 1 | 3 | STLSGAAMEPAPRWLAGLR                       | 1 |
| SELS_HUMAN (Q9BQE4) Selenoprotein S (VCP-interacting membrane protein) [MASS=21116]                                                                                                                         | 0.00 | 11.11 | 0.69 | 0.00 | 1  | 1 | 2 | GGGYNPLSGEGGGAC[330]SWRPGR                | 1 |
| SEM4F_HUMAN (O95754) Semaphorin-4F precursor (Semaphorin W) (Sema W) (Semaphorin M) (Sema M) [MASS=83511]                                                                                                   | *    | 3.64  | *    | *    | *  | 1 | 3 | PRPGPGQPTASPFLLLLAVLSGPVSGR               | 1 |
| SEM4G_HUMAN (Q9NTN9) Semaphorin-4G precursor [MASS=91496]                                                                                                                                                   | *    | 4.18  | *    | *    | *  | 2 | 3 | ESKASAVGDDDKVYFFTER                       | 1 |
|                                                                                                                                                                                                             |      |       |      |      |    |   | 3 | LHPLM[147]ARPVVPTRGR                      | 1 |



|                                                                                                                                                                                                                                                                              |      |       |      |      |   |   |   |                                           |   |
|------------------------------------------------------------------------------------------------------------------------------------------------------------------------------------------------------------------------------------------------------------------------------|------|-------|------|------|---|---|---|-------------------------------------------|---|
| SGTB_HUMAN (Q96EQ0) Small glutamine-rich tetratricopeptide repeat-containing protein B (Small glutamine-rich protein with tetratricopeptide repeats 2) [MASS=33429]                                                                                                          | *    | 4.28  | *    | *    | * | 1 | 3 | LGHYTDAIKDC[330]JEK                       | 1 |
| SHPS1_HUMAN (P78324) Tyrosine-protein phosphatase non-receptor type substrate 1 precursor (SHP substrate 1) (SHPS-1) (Inhibitory receptor SHPS-1) (Signal-regulatory protein alpha-1) (Sirp-alpha-1) (Sirp-alpha-2) (Sirp-alpha-3) (MyD-1 antigen) (Brain Ig-I [MASS=54812]) | 1.00 | 6.76  | 0.29 | 0.33 | 7 | 2 | 2 | ATPQHTVSFTC[330]ESHGFSPR                  | 2 |
|                                                                                                                                                                                                                                                                              |      |       |      |      |   |   | 3 | ATPQHTVSFTC[330]ESHGFSPR                  | 1 |
|                                                                                                                                                                                                                                                                              |      |       |      |      |   |   | 3 | ATPQHTVSFTC[339]ESHGFSPR                  | 1 |
|                                                                                                                                                                                                                                                                              |      |       |      |      |   |   | 2 | ATPQHTVSFTC[339]ESHGFSPR                  | 1 |
|                                                                                                                                                                                                                                                                              |      |       |      |      |   |   | 2 | LTC[339]QVEHDGQPAVSK                      | 1 |
|                                                                                                                                                                                                                                                                              |      |       |      |      |   |   | 2 | LTC[330]QVEHDGQPAVSK                      | 1 |
| SI1L1_HUMAN (O43166) Signal-induced proliferation-associated 1-like protein 1 (High-risk human papilloma viruses E6 oncoproteins targeted protein 1) (E6-targeted protein 1) [MASS=199940]                                                                                   | *    | 1.94  | *    | *    | * | 2 | 2 | LIDLESPTPESQK                             | 1 |
|                                                                                                                                                                                                                                                                              |      |       |      |      |   |   | 3 | EKSKYPGAEISSM[147]GAIVWAVR                | 1 |
|                                                                                                                                                                                                                                                                              |      |       |      |      |   |   | 3 | ATPEHTVSFTC[330]ESHGFSPR                  | 1 |
|                                                                                                                                                                                                                                                                              |      |       |      |      |   |   | 3 | GLQLTWLENGNVS                             | 7 |
| SIRB1_HUMAN (O00241) Signal-regulatory protein beta-1 precursor (SIRP-beta-1) (CD172b antigen) [MASS=43255]                                                                                                                                                                  | 1.00 | 8.29  | 0.23 | 0.08 | 2 | 2 |   |                                           |   |
|                                                                                                                                                                                                                                                                              |      |       |      |      |   |   | 2 | ATPEHTVSFTC[330]ESHGFSPR                  | 1 |
| SIRT2_HUMAN (Q8IXJ6) NAD-dependent deacetylase sirtuin-2 (EC 3.5.1.-) (SIR2-like) (SIR2-like protein 2) [MASS=43182]                                                                                                                                                         | 0.99 | 16.71 | 0.50 | 0.00 | 1 | 3 | 2 | C[330]EDC[330]QSLVKPDIVFFGESLPAR          | 1 |
|                                                                                                                                                                                                                                                                              |      |       |      |      |   |   | 2 | DVAWLGEIC[330]DQGC[339]LALAEELGWKK        | 1 |
|                                                                                                                                                                                                                                                                              |      |       |      |      |   |   | 3 | RVIC[330]LVGAGISTSAIGIPDFR                | 1 |
| SIRT7_HUMAN (Q9NRC8) NAD-dependent deacetylase sirtuin-7 (EC 3.5.1.-) (SIR2-like protein 7) [MASS=44898]                                                                                                                                                                     | 0.00 | 3.25  | 0.87 | 0.00 | 1 | 1 | 2 | RQEEVC[339]DDPEELR                        | 1 |
| SKI_HUMAN (P12755) Ski oncogene (C-ski) [MASS=80005]                                                                                                                                                                                                                         | 0.00 | 4.40  | 1.21 | 0.00 | 1 | 1 | 3 | C[339]TADQLEILKVMGILPFSAPSC[339]GLITKTAER | 1 |
| SLIT1_HUMAN (O75093) Slit homolog 1 protein precursor (Slit-1) (Multiple epidermal growth factor-like domains 4) [MASS=167924]                                                                                                                                               | 0.00 | 2.41  | 2.45 | 0.00 | 1 | 2 | 3 | C[339]AGPQDM[147]EGKLLLTTPAK              | 1 |
|                                                                                                                                                                                                                                                                              |      |       |      |      |   |   | 2 | NNRISC[330]IHNSFTGLRNVR                   | 1 |
| SLIT3_HUMAN (O75094) Slit homolog 3 protein precursor (Slit-3) (Multiple epidermal growth factor-like domains 5) [MASS=167685]                                                                                                                                               | *    | 1.18  | *    | *    | * | 1 | 3 | SRFSSEC[339]FM[147]DLVC[330]PEKC[339]R    | 1 |

|                                                                                                                                                                                                                                                                              |      |       |      |      |   |   |   |                                          |   |
|------------------------------------------------------------------------------------------------------------------------------------------------------------------------------------------------------------------------------------------------------------------------------|------|-------|------|------|---|---|---|------------------------------------------|---|
| SMCA1_HUMAN (P28370) Probable global transcription activator SNF2L1 (EC 3.6.1.-) (ATP-dependent helicase SMARCA1) (SWI/SNF-related matrix-associated actin-dependent regulator of chromatin subfamily A member 1) [MASS=114731]                                              | *    | 7.27  | *    | *    | * | 4 | 2 | GYEYC[339]R                              | 3 |
|                                                                                                                                                                                                                                                                              |      |       |      |      |   |   | 3 | LFELLEKEILYYR                            | 1 |
|                                                                                                                                                                                                                                                                              |      |       |      |      |   |   | 3 | C[339]C[330]NHPYLFDDGAEPGPPYTTDEHIVSNSGK | 1 |
|                                                                                                                                                                                                                                                                              |      |       |      |      |   |   | 3 | NIPGPHM[147]VLVPKSTLHNWM[147]NEFK        | 1 |
| SMCE1_HUMAN (Q969G3) SWI/SNF-related matrix-associated actin-dependent regulator of chromatin subfamily E member 1 (BRG1-associated factor 57) [MASS=46649]                                                                                                                  | 0.00 | 6.33  | 0.17 | 0.12 | 2 | 2 | 2 | RLC[330]GLKVEVDM[147]EK                  | 2 |
|                                                                                                                                                                                                                                                                              |      |       |      |      |   |   | 3 | LWEIGKIIGGM[147]WR                       | 1 |
| SMOC1_HUMAN (Q9H4F8) SPARC-related modular calcium-binding protein 1 precursor (Secreted modular calcium-binding protein 1) (SMOC-1) [MASS=48162]                                                                                                                            | *    | 8.99  | *    | *    | * | 2 | 3 | TQPKPIC[339]ASDGRSYESMC[330]EYQR         | 1 |
|                                                                                                                                                                                                                                                                              |      |       |      |      |   |   | 3 | LLTPHLLLVQLSPAR                          | 1 |
| SMOC2_HUMAN (Q9H3U7) SPARC-related modular calcium-binding protein 2 precursor (Secreted modular calcium-binding protein 2) (SMOC-2) (Smooth muscle-associated protein 2) (SMAP-2) [MASS=49674]                                                                              | 0.00 | 3.36  | *    | *    | * | 1 | 2 | C[330]VKKFVEYC[339]DVNNDK                | 1 |
| SMOO_HUMAN (P53814) Smoothelin [MASS=99516]                                                                                                                                                                                                                                  | *    | 6.22  | *    | *    | * | 3 | 3 | SPLSAEELMTIEDEGLDKMLDQSTDFEERK           | 1 |
|                                                                                                                                                                                                                                                                              |      |       |      |      |   |   | 2 | SC[330]PQEEGPRGR                         | 1 |
|                                                                                                                                                                                                                                                                              |      |       |      |      |   |   | 2 | C[330]VFTYVQSLYNHLRR                     | 1 |
| SMRA3_HUMAN (Q14527) SWI/SNF-related matrix-associated actin-dependent regulator of chromatin subfamily A member 3 (EC 3.6.1.-) (Sucrose nonfermenting protein 2-like 3) (DNA-binding protein/plasminogen activator inhibitor 1 regulator) (Helicase-like tran [MASS=113928] | *    | 1.29  | *    | *    | * | 1 | 2 | AGGVGLNLSAASR                            | 1 |
| SMYD3_HUMAN (Q9H7B4) SET and MYND domain-containing protein 3 (EC 2.1.1.43) (Zinc finger MYND domain-containing protein 1) [MASS=49083]                                                                                                                                      | 0.00 | 4.67  | 0.26 | 0.00 | 1 | 1 | 2 | EHSIEDLILLEEC[330]DANIR                  | 2 |
| SNAB_HUMAN (Q9H115) Beta-soluble NSF attachment protein (SNAP-beta) (N-ethylmaleimide-sensitive factor attachment protein, beta) [MASS=33557]                                                                                                                                | 1.00 | 12.42 | 0.90 | 0.02 | 2 | 2 | 2 | AALC[339]HFIVDELNAK                      | 1 |
|                                                                                                                                                                                                                                                                              |      |       |      |      |   |   | 2 | AIEIYEQVGANTM[147]DNPLLKYSK              | 1 |
|                                                                                                                                                                                                                                                                              |      |       |      |      |   |   | 2 | AALC[330]HFIVDELNAK                      | 1 |

|                                                                                                                                                                                                                  |      |       |      |      |   |   |   |                                             |   |
|------------------------------------------------------------------------------------------------------------------------------------------------------------------------------------------------------------------|------|-------|------|------|---|---|---|---------------------------------------------|---|
| SNAT_HUMAN (Q16613) Serotonin N-acetyltransferase (EC 2.3.1.87) (Aralkylamine N acetyltransferase) (AA-NAT) (Serotonin acetylase) [MASS=23344]                                                                   | 0.00 | 6.76  | 0.52 | 0.00 | 1 | 1 | 2 | LPPGIPESPSC[330]QRR                         | 1 |
| SNX23_HUMAN (Q96L93) Kinesin-like motor protein C20orf23 (Sorting nexin-23) [MASS=152010]                                                                                                                        | *    | 5.39  | *    | *    | * | 4 | 3 | SYTM[147]M[147]GNSGDSGLIPR                  | 1 |
|                                                                                                                                                                                                                  |      |       |      |      |   |   | 3 | DPIKISIPRYVLC[330]GQGK                      | 1 |
|                                                                                                                                                                                                                  |      |       |      |      |   |   | 2 | ERTKTFTYDFSFYADTK                           | 1 |
|                                                                                                                                                                                                                  |      |       |      |      |   |   | 3 | LQDLHRVISEGC[330]STSADTMK                   | 1 |
| SNX4_HUMAN (O95219) Sorting nexin-4 [MASS=51908]                                                                                                                                                                 | 0.00 | 3.78  | 0.86 | 0.00 | 1 | 2 | 2 | YSEFELLR                                    | 1 |
|                                                                                                                                                                                                                  |      |       |      |      |   |   | 2 | IASHPILC[330]R                              | 1 |
| SO5A1_HUMAN (Q9H2Y9) Solute carrier organic anion transporter family member 5A1 (Solute carrier family 21 member 15) (Organic anion transporter polypeptide-related protein 4) (OATP-RP4) (OATPRP4) [MASS=91878] | *    | 4.13  | *    | *    | * | 2 | 2 | TYLNENGYAVSGKC[330]KR                       | 1 |
|                                                                                                                                                                                                                  |      |       |      |      |   |   | 2 | SC[330]PAFSTQGEFHEETGLQK                    | 1 |
| SODC_HUMAN (P00441) Superoxide dismutase [Cu-Zn] (EC 1.15.1.1) [MASS=15804]                                                                                                                                      | 0.99 | 27.45 | 0.71 | 0.00 | 1 | 2 | 3 | HVGD LGNVTADKDG VADVSIEDSVISLSGDHC[330]IIGR | 1 |
|                                                                                                                                                                                                                  |      |       |      |      |   |   | 1 | VWGSIK                                      | 1 |
| SOM2_HUMAN (P01242) Growth hormone variant precursor (GH-V) (Placenta-specific growth hormone) (Growth hormone 2) [MASS=24999]                                                                                   | *    | 11.06 | *    | *    | * | 1 | 3 | TGQIFNQSYSKFDTKSHND DALLK                   | 1 |
| SON_HUMAN (P18583) SON protein (SON3) (Negative regulatory element-binding protein) (NRE-binding protein) (DBP-5) (Bax antagonist selected in saccharomyces 1) (BASS1) [MASS=263845]                             | 0.00 | 2.80  | 1.43 | 0.00 | 1 | 4 | 2 | C[339]VSVQTDPTDEIPTKK                       | 1 |
|                                                                                                                                                                                                                  |      |       |      |      |   |   | 3 | LTDLDKAQLLEIAK                              | 1 |
|                                                                                                                                                                                                                  |      |       |      |      |   |   | 2 | PLM[147]LASRRSMMM[147]SYAAER                | 1 |
|                                                                                                                                                                                                                  |      |       |      |      |   |   | 2 | SM[147]M[147]SMGADRSMM[147]SSYSAADR         | 1 |
| SORCN_HUMAN (P30626) Sorcin (22 kDa protein) (CP-22) (V19) [MASS=21676]                                                                                                                                          | 0.67 | 10.10 | 0.73 | 0.00 | 1 | 1 | 3 | C[330]LTQSGIAGGYKPFNLETC[330]R              | 1 |
|                                                                                                                                                                                                                  |      |       |      |      |   |   | 3 | C[330]LTQSGIAGGYKPFNLETC[339]R              | 1 |
| SORT_HUMAN (Q99523) Sortilin precursor (Neurotensin receptor 3) (NTR3) (NT3) (Glycoprotein 95) (Gp95) (100 kDa NT receptor) [MASS=92067]                                                                         | 0.00 | 7.58  | *    | *    | * | 3 | 2 | TIGVKIYSFGLGGRFLFASVM[147]ADK               | 1 |
|                                                                                                                                                                                                                  |      |       |      |      |   |   | 3 | TEFGMAIGPENSGKVVLTAEVSGGSRGGR               | 1 |
|                                                                                                                                                                                                                  |      |       |      |      |   |   | 2 | FLFASVM[147]ADK                             | 1 |
| SPAG1_HUMAN (Q07617) Sperm-associated antigen 1 (Infertility-related sperm protein Spag-1) (HSD-3.8) [MASS=103600]                                                                                               | *    | 1.62  | *    | *    | * | 1 | 2 | C[330]SDVKHLEKILC[330]VLR                   | 1 |

|                                                                                                                                                                                                                                                                            |      |      |      |      |   |   |                            |                                                                                                                                  |                            |
|----------------------------------------------------------------------------------------------------------------------------------------------------------------------------------------------------------------------------------------------------------------------------|------|------|------|------|---|---|----------------------------|----------------------------------------------------------------------------------------------------------------------------------|----------------------------|
| SPAG8_HUMAN (Q99932) Sperm-associated antigen 8 (Sperm membrane protein 1) (SMP-1) (HSD-1) (Sperm membrane protein BS-84) [MASS=44818]                                                                                                                                     | 0.00 | 3.29 | 0.60 | 0.00 | 1 | 1 | 2                          | EAM[147]LEMLLQHQC[330]K                                                                                                          | 1                          |
| SPAST_HUMAN (Q9UBP0) Spastin [MASS=67197]                                                                                                                                                                                                                                  | *    | 4.22 | *    | *    | * | 1 | 2                          | SSGAAPAPASASAPAPVPGGEAERVR                                                                                                       | 1                          |
| SPN90_HUMAN (Q9NZQ3) SH3 adapter protein SPIN90 (NCK-interacting protein with SH3 domain) (SH3 protein interacting with Nck, 90 kDa) (VacA-interacting protein, 54 kDa) (VIP54) (AF3p21) (Diaphanous protein-interacting protein) (Dia-interacting protein 1) [MASS=78960] | *    | 6.23 | *    | *    | * | 2 | 3<br>3                     | ILNEEETSPQC[339]QMDRM[147]IVREMC[330]K<br>M[147]C[330]KRNEFESVLALVAYYQM[147]EHR                                                  | 1<br>1                     |
| SPSY_HUMAN (P52788) Spermine synthase (EC 2.5.1.22) (Spermidine aminopropyltransferase) (SPMSY) [MASS=41268]                                                                                                                                                               | *    | 3.28 | *    | *    | * | 1 | 3                          | ELSQDSTGRVKR                                                                                                                     | 1                          |
| SPT5H_HUMAN (O00267) Transcription elongation factor SPT5 (hSPT5) (DRB sensitivity-inducing factor large subunit) (DSIF large subunit) (DSIF p160) (Tat-cotransactivator 1 protein) (Tat-CT1 protein) [MASS=120999]                                                        | *    | 1.29 | *    | *    | * | 1 | 3                          | IGEERATAISLM[147]RK                                                                                                              | 1                          |
| SPTA2_HUMAN (Q13813) Spectrin alpha chain, brain (Spectrin, non-erythroid alpha chain) (Alpha-II spectrin) (Fodrin alpha chain) [MASS=284537]                                                                                                                              | *    | 1.90 | *    | *    | * | 3 | 3<br>2<br>2                | HASLM[147]KRWSQLLANSAAR<br>EFSMMFK<br>DVTGAEALLERHQEHRTEIDAR                                                                     | 1<br>1<br>1                |
| SPTB1_HUMAN (P11277) Spectrin beta chain, erythrocyte (Beta-I spectrin) [MASS=246189]                                                                                                                                                                                      | 0.97 | 4.68 | 0.95 | 0.00 | 1 | 6 | 2<br>2<br>3<br>3<br>2<br>2 | EKEQIYSSLDYGKDLTSVLILQR<br>AVASEDMPELPEAEQLLQQHAGIK<br>LWSYLQELLQSR<br>EVSAQWDQLKDAAFC[330]KK<br>IHC[330]LENVDK<br>LWSYLQELLQSRR | 1<br>1<br>1<br>1<br>1<br>1 |
| SPTN2_HUMAN (O15020) Spectrin beta chain, brain 2 (Spectrin, non-erythroid beta chain 2) (Beta-III spectrin) [MASS=271293]                                                                                                                                                 | 0.97 | 1.92 | *    | *    | * | 2 | 3<br>2                     | M[147]SSTLSPTDFDSLEIQGQYSDINNR<br>DAAEAEAWMGEQELHM[147]M[147]GQEK                                                                | 1<br>1                     |
| SQRD_HUMAN (Q9Y6N5) Sulfide:quinone oxidoreductase, mitochondrial precursor (EC 1.-.-) [MASS=49960]                                                                                                                                                                        | *    | 6.44 | *    | *    | * | 2 | 2<br>3                     | YDGYTSC[330]PLVTGYNR<br>ADLMPFLYWNMM[147]LR                                                                                      | 1<br>2                     |



|                                                                                                                                                                                                                                                                            |      |       |      |      |   |   |   |                                                |   |
|----------------------------------------------------------------------------------------------------------------------------------------------------------------------------------------------------------------------------------------------------------------------------|------|-------|------|------|---|---|---|------------------------------------------------|---|
| SRC_HUMAN (P12931) Proto-oncogene tyrosine-protein kinase Src (EC 2.7.10.2) (p60-Src) (c-Src) (pp60c-src) [MASS=59703]                                                                                                                                                     | *    | 12.52 | *    | *    | * | 3 | 3 | LPQLVDM[147]AAQIASGM[147]AYVERM[147]NYVHR      | 1 |
|                                                                                                                                                                                                                                                                            |      |       |      |      |   |   | 2 | ESETTKGAYC[330]LSVSDFDNAKGLNVK                 | 1 |
|                                                                                                                                                                                                                                                                            |      |       |      |      |   |   | 2 | DLRAANILVGENLVLC[339]K                         | 1 |
| SSDH_HUMAN (P51649) Succinate semialdehyde dehydrogenase, mitochondrial precursor (EC 1.2.1.24) (NAD(+)-dependent succinic semialdehyde dehydrogenase) [MASS=57214]                                                                                                        | 0.00 | 9.72  | *    | *    | * | 2 | 3 | NFFEPTLLC[330]NVTQDM[147]LC[339]THEETFGPLAPVIK | 1 |
|                                                                                                                                                                                                                                                                            |      |       |      |      |   |   | 2 | NLRVGNNGFEETTQGPLINEK                          | 1 |
| SSR3_HUMAN (P32745) Somatostatin receptor type 3 (SS3R) (SSR-28) [MASS=45847]                                                                                                                                                                                              | 0.00 | 4.07  | 0.65 | 0.00 | 1 | 1 | 2 | GM[147]STC[330]HMQWPEPAAAWR                    | 1 |
| ST18_HUMAN (O60284) Suppression of tumorigenicity protein 18 (Zinc finger protein 387) [MASS=115154]                                                                                                                                                                       | *    | 1.43  | *    | *    | * | 1 | 3 | C[339]PVIGC[339]DGQGHISGK                      | 1 |
| STAB2_HUMAN (Q8WWQ8) Stabilin-2 precursor (FEEL-2 protein) (Fasciclin EGF-like laminin-type EGF-like and link domain-containing scavenger receptor 1) (FAS1 EGF-like and X-link domain-containing adhesion molecule 2) (Hyaluronan receptor for endocytosis) [MASS=277027] | 0.00 | 4.94  | *    | *    | * | 7 | 3 | STVC[339]KYDGPQSHC[339]EC[330]K                | 1 |
|                                                                                                                                                                                                                                                                            |      |       |      |      |   |   | 3 | M[147]KDVNC[339]TC[330]K                       | 1 |
|                                                                                                                                                                                                                                                                            |      |       |      |      |   |   | 3 | C[339]PDGYTM[147]ITSGSVGVRDC[330]R             | 1 |
|                                                                                                                                                                                                                                                                            |      |       |      |      |   |   | 2 | DLVGPGPFTVFAPLSAAFDEEARVK                      | 1 |
|                                                                                                                                                                                                                                                                            |      |       |      |      |   |   | 2 | VLEIQKNRC[330]DNNDTTIIR                        | 1 |
|                                                                                                                                                                                                                                                                            |      |       |      |      |   |   | 3 | SC[330]ALNLGVKC[330]PDGYTM[147]ITSGSVGVR       | 1 |
|                                                                                                                                                                                                                                                                            |      |       |      |      |   |   | 2 | GVKQKC[330]LYNLPEK                             | 1 |
| STAG2_HUMAN (Q8N3U4) Cohesin subunit SA-2 (Stromal antigen 2) (SCC3 homolog 2) [MASS=141326]                                                                                                                                                                               | *    | 1.38  | *    | *    | * | 1 | 3 | TVYVYLEKFMTFQMSLR                              | 1 |
| STAR_HUMAN (P49675) Steroidogenic acute regulatory protein, mitochondrial precursor (Star) (StARD1) [MASS=31914]                                                                                                                                                           | 0.00 | 7.02  | 1.18 | 0.00 | 1 | 1 | 2 | GSTC[339]VLAGMATDFGNM[147]PEQK                 | 1 |
| STS_HUMAN (P08842) Steryl-sulfatase precursor (EC 3.1.6.2) (Steroid sulfatase) (Steryl-sulfate sulfohydrolase) (Arylsulfatase C) (ASC) [MASS=65492]                                                                                                                        | 0.00 | 7.72  | 6.52 | 0.00 | 1 | 3 | 2 | DC[339]KPGEGSVFTTGFK                           | 1 |
|                                                                                                                                                                                                                                                                            |      |       |      |      |   |   | 3 | PGEKSVFTTGFKR                                  | 2 |
|                                                                                                                                                                                                                                                                            |      |       |      |      |   |   | 3 | IIDGRDLM[147]PLLEGKSQR                         | 1 |
| STX11_HUMAN (O75558) Syntaxin-11 [MASS=33196]                                                                                                                                                                                                                              | 0.00 | 5.92  | 1.40 | 0.00 | 1 | 1 | 2 | AMHDYNAEM[147]KQRDNC[339]K                     | 1 |

|                                                                                                                                                                                                                                                 |      |       |      |      |   |   |   |                                                      |   |
|-------------------------------------------------------------------------------------------------------------------------------------------------------------------------------------------------------------------------------------------------|------|-------|------|------|---|---|---|------------------------------------------------------|---|
| STXB1_HUMAN (P61764) Syntaxin-binding protein 1 (Unc-18 homolog) (Unc-18A) (Unc-18-1) (N-Sec1) (p67) [MASS=67568]                                                                                                                               | 1.00 | 7.41  | 0.57 | 0.31 | 5 | 4 | 2 | M[147]LSSC[330]C[330]K                               | 1 |
|                                                                                                                                                                                                                                                 |      |       |      |      |   |   | 2 | YSTHLHLAEDC[330]MK                                   | 1 |
|                                                                                                                                                                                                                                                 |      |       |      |      |   |   | 2 | YSTHLHLAEDC[339]M[147]K                              | 1 |
|                                                                                                                                                                                                                                                 |      |       |      |      |   |   | 2 | HYQGTVDKLC[330]R                                     | 2 |
|                                                                                                                                                                                                                                                 |      |       |      |      |   |   | 1 | LAEQIATLC[330]ATLK                                   | 1 |
|                                                                                                                                                                                                                                                 |      |       |      |      |   |   |   |                                                      |   |
| SUCB1_HUMAN (Q9P2R7) Succinyl-CoA ligase [ADP-forming] beta-chain, mitochondrial precursor (EC 6.2.1.5) (Succinyl-CoA synthetase, betaA chain) (SCS-betaA) (ATP-specific succinyl-CoA synthetase subunit beta) (NY-REN-39 antigen) [MASS=50317] | 0.94 | 9.50  | 5.60 | 0.00 | 1 | 2 | 2 | ILAC[339]DDLDEAAR                                    | 1 |
|                                                                                                                                                                                                                                                 |      |       |      |      |   |   | 3 | LYSLFLKYDATM[147]IEINPM[147]VEDSDGAVLC[339]M[147]DAK | 1 |
| SURF4_HUMAN (O15260) Surfeit locus protein 4 [MASS=30394]                                                                                                                                                                                       | 0.98 | 13.38 | 1.01 | 0.00 | 1 | 3 | 2 | ESSPKQYM[147]QLGGR                                   | 1 |
|                                                                                                                                                                                                                                                 |      |       |      |      |   |   | 2 | SM[147]FAGVPTMR                                      | 1 |
|                                                                                                                                                                                                                                                 |      |       |      |      |   |   | 2 | LC[330]LISTFLEDGIR                                   | 1 |
|                                                                                                                                                                                                                                                 |      |       |      |      |   |   |   |                                                      |   |
| SV2A_HUMAN (Q7L0J3) Synaptic vesicle glycoprotein 2A [MASS=82695]                                                                                                                                                                               | 0.69 | 3.37  | *    | *    | * | 1 | 2 | AAPILFASAALALGSSSLALKLPETR                           | 1 |
|                                                                                                                                                                                                                                                 |      |       |      |      |   |   | 3 | RLNNKVGGM[147]HETVLTVTGK                             | 1 |
|                                                                                                                                                                                                                                                 |      |       |      |      |   |   | 3 | GSLERANPPITHLGDEPK                                   | 1 |
|                                                                                                                                                                                                                                                 |      |       |      |      |   |   | 3 | ELAEQGEPSSTLSLAEKLALFNK                              | 1 |
|                                                                                                                                                                                                                                                 |      |       |      |      |   |   | 3 | VQASKNPLKM[147]LAAR                                  | 6 |
| SVIL_HUMAN (O95425) Supervillin (Archvillin) (p205/p250) [MASS=247705]                                                                                                                                                                          | *    | 5.60  | *    | *    | * | 7 |   |                                                      |   |
|                                                                                                                                                                                                                                                 |      |       |      |      |   |   | 3 | SRTSM[147]VVLNVNKALIYLWHGC[330]K                     | 1 |
|                                                                                                                                                                                                                                                 |      |       |      |      |   |   | 2 | RLMLLQIK                                             | 1 |
|                                                                                                                                                                                                                                                 |      |       |      |      |   |   | 2 | GRGAANDSTQFTVAGRM[147]VK                             | 1 |
|                                                                                                                                                                                                                                                 |      |       |      |      |   |   |   |                                                      |   |
| SYA_HUMAN (P49588) Alanyl-tRNA synthetase (EC 6.1.1.7) (Alanine--tRNA ligase) (AlaRS) (NY-REN-42 antigen) [MASS=106801]                                                                                                                         | *    | 10.54 | *    | *    | * | 5 | 3 | NAQVRGGYVLHIGTIYGLDKVGDQVWLFIDEPR                    | 1 |
|                                                                                                                                                                                                                                                 |      |       |      |      |   |   | 2 | ARGLEVTDDSPK                                         | 1 |
|                                                                                                                                                                                                                                                 |      |       |      |      |   |   | 2 | QIWQNLGLDDTKILPGNMK                                  | 1 |
|                                                                                                                                                                                                                                                 |      |       |      |      |   |   | 3 | LAQLKSQKGAGGEDLIMLDIYAIEELR                          | 1 |
|                                                                                                                                                                                                                                                 |      |       |      |      |   |   | 3 | C[339]LSVM[147]EAKVK                                 | 1 |
| SYEP_HUMAN (P07814) Bifunctional aminoacyl-tRNA synthetase [Includes: Glutamyl-tRNA synthetase (EC 6.1.1.17) (Glutamate--tRNA ligase); Prolyl-tRNA synthetase (EC 6.1.1.15) (Proline--tRNA ligase)] [MASS=163025]                               | 0.99 | 3.06  | 1.12 | 0.00 | 1 | 2 | 2 | VTVRFPPEASGYLHIGHAK                                  | 1 |
|                                                                                                                                                                                                                                                 |      |       |      |      |   |   | 3 | YNVYPTYDFAC[339]PIVDSIEGVTHALR                       | 1 |

|                                                                                                                                                                                                   |      |      |      |      |   |    |                                                                                                                                                                                                                                                                                                                                |                                                     |   |
|---------------------------------------------------------------------------------------------------------------------------------------------------------------------------------------------------|------|------|------|------|---|----|--------------------------------------------------------------------------------------------------------------------------------------------------------------------------------------------------------------------------------------------------------------------------------------------------------------------------------|-----------------------------------------------------|---|
| SYFA_HUMAN (Q9Y285) Phenylalanyl-tRNA synthetase alpha chain (EC 6.1.1.20) (Phenylalanine--tRNA ligase alpha chain) (PheRS) (CML33) [MASS=57432]                                                  | 0.00 | 2.56 | 6.58 | 0.00 | 1 | 1  | 2                                                                                                                                                                                                                                                                                                                              | VNLQM[147]VYDSPLC[330]R                             | 1 |
| SYFB_HUMAN (Q9NSD9) Phenylalanyl-tRNA synthetase beta chain (EC 6.1.1.20) (Phenylalanine--tRNA ligase beta chain) (PheRS) [MASS=66129]                                                            | 1.00 | 6.79 | 1.81 | 0.00 | 2 | 3  | 2 LHQNIC[339]R<br>3 DRYDSFIELQEKLHQNIC[339]R<br>2 TKEYTAC[339]ELMNIYK<br>2 LHQNIC[330]R                                                                                                                                                                                                                                        | 1<br>1<br>1<br>1                                    |   |
| SYGP1_HUMAN (Q96PV0) Ras GTPase-activating protein SynGAP (Synaptic Ras-GTPase-activating protein 1) (Synaptic Ras-GAP 1) (Neuronal RasGAP) [MASS=146675]                                         | 0.67 | 4.82 | 0.79 | 0.00 | 1 | 3  | 2 FC[339]IISGNQLLMLDEDEIHPLLR<br>2 PSSGNLLQSPEPSYGPAP<br>2 LM[147]LVEEELRRDHPAM[147]AEPLPEPK                                                                                                                                                                                                                                   | 1<br>1<br>1                                         |   |
| SYIM_HUMAN (Q9NSE4) Isoleucyl-tRNA synthetase, mitochondrial precursor (EC 6.1.1.5) (Isoleucine--tRNA ligase) (IleRS) [MASS=113791]                                                               | 1.00 | 6.72 | 1.86 | 0.03 | 2 | 3  | 3 VASVASTLETTTFETISTLSGVDLENGTC[330]SHPLIPDK<br>2 SC[339]QTALVEILDVIVR<br>2 TALAEAELEYNPEHVSR                                                                                                                                                                                                                                  | 1<br>1<br>1                                         |   |
| SYNE1_HUMAN (Q8NF91) Nesprin-1 (Nuclear envelope spectrin repeat protein 1) (Synaptic nuclear envelope protein 1) (Syne-1) (Myocyte nuclear envelope protein 1) (Myne-1) (Enaptin) [MASS=1011035] | *    | 2.26 | *    | *    | * | 12 | 3 MATSRGASRC[339]PR<br>2 LQDM[147]YDELM[147]MIIGSR<br>2 LHKQWKDLQGEAPYHLLHLK<br>3 ASQLEKTGNDASKATLSR<br>3 YKSLQQTVLSHEPSVKSVR<br>2 ELGQTTWANLDHM[147]VGQLKILLK<br>2 TLEVLLKDMEK<br>2 HFKEDFDK<br>3 GLLQDALMQC[339]QGFHEM[147]SHGLLLMLENIDR<br>2 LYDLPAK<br>2 EM[147]FATM[147]SKLKEQLTK<br>3 VASLQDMSC[330]QLLVNAEGTDC[339]LEAK | 1<br>1<br>1<br>1<br>1<br>1<br>1<br>1<br>1<br>1<br>1 |   |
| SYNPR_HUMAN (Q8TBG9) Synaptoporin [MASS=29166]                                                                                                                                                    | *    | 8.30 | *    | *    | * | 1  | 2 GLSDVKVATDPKEVLLLM[147]SAC[339]K                                                                                                                                                                                                                                                                                             | 1                                                   |   |
| SYPH_HUMAN (P08247) Synaptophysin (Major synaptic vesicle protein p38) [MASS=33845]                                                                                                               | 1.00 | 5.75 | 0.49 | 0.05 | 4 | 2  | 2 LHQVYFDAPTC[339]R<br>3 LHQVYFDAPTC[330]R<br>2 LHQVYFDAPTC[330]R<br>2 EM[147]PVC[330]R                                                                                                                                                                                                                                        | 1<br>1<br>1<br>1                                    |   |
| SYT1_HUMAN (P21579) Synaptotagmin-1 (Synaptotagmin I) (Sytl) (p65) [MASS=47573]                                                                                                                   | 0.88 | 2.13 | 0.55 | 0.00 | 1 | 1  | 2 LGDIC[330]FSLR                                                                                                                                                                                                                                                                                                               | 1                                                   |   |

|                                                                                                                                                                                                                                                                   |      |      |      |      |   |   |   |                               |   |
|-------------------------------------------------------------------------------------------------------------------------------------------------------------------------------------------------------------------------------------------------------------------|------|------|------|------|---|---|---|-------------------------------|---|
| SYW_HUMAN (P23381) Tryptophanyl-tRNA synthetase (EC 6.1.1.2) (Tryptophan--tRNA ligase) (TrpRS) (IFP53) (hWRS) [MASS=53165]                                                                                                                                        | 0.00 | 6.79 | 2.14 | 0.00 | 1 | 2 | 3 | QFGGNC[339]DVDVVSFMYLTFLEDDDK | 1 |
|                                                                                                                                                                                                                                                                   |      |      |      |      |   |   | 2 | EVTDEIVK                      | 1 |
| TAB3_HUMAN (Q8N5C8) Mitogen-activated protein kinase kinase kinase 7-interacting protein 3 (TAK1-binding protein 3) (NF-kappa-B-activating protein 1) [MASS=78652]                                                                                                | 0.00 | 2.11 | 1.62 | 0.00 | 1 | 1 | 2 | VSC[339]TTAIPTEEM[147]TR      | 1 |
| TAD2L_HUMAN (O75478) Transcriptional adapter 2-like (ADA2-like protein) [MASS=51496]                                                                                                                                                                              | *    | 5.42 | *    | *    | * | 1 | 3 | LVPGAYLEYKSALLNEC[339]NKQGGLR | 1 |
| TAF3_HUMAN (Q5VWG9) Transcription initiation factor TFIID subunit 3 (TBP-associated factor 3) (Transcription initiation factor TFIID 140 kDa subunit) (140 kDa TATA box-binding protein-associated factor) (TAF140) (TAFII140) [MASS=103581]                      | 0.00 | 0.75 | *    | *    | * | 1 | 1 | VGAGQDK                       | 1 |
| TAP1_HUMAN (Q03518) Antigen peptide transporter 1 (APT1) (Peptide transporter TAP1) (ATP-binding cassette sub-family B member 2) (Peptide transporter PSF1) (Peptide supply factor 1) (PSF-1) (Peptide transporter involved in antigen processing 1) [MASS=80964] | *    | 5.48 | *    | *    | * | 2 | 2 | QETEFFQQNQTGNIM[147]SR        | 1 |
|                                                                                                                                                                                                                                                                   |      |      |      |      |   |   | 2 | LSLFLVLVVLSSLGEMAIFFTGR       | 1 |
| TATD2_HUMAN (Q93075) TatD DNase domain-containing deoxyribonuclease 2 (EC 3.1.21.-) [MASS=85039]                                                                                                                                                                  | 0.00 | 4.99 | 0.79 | 0.00 | 1 | 2 | 2 | SVTVTAAQKEKDATPEVSMEEK        | 1 |
|                                                                                                                                                                                                                                                                   |      |      |      |      |   |   | 2 | HC[330]FTGSYPVIEPLLK          | 1 |
| TAU_HUMAN (P10636) Microtubule-associated protein tau (Neurofibrillary tangle protein) (Paired helical filament-tau) (PHF-tau) [MASS=78746]                                                                                                                       | *    | 3.30 | *    | *    | * | 2 | 2 | IPAKTPPAPK                    | 1 |
|                                                                                                                                                                                                                                                                   |      |      |      |      |   |   | 3 | TKIATPRGAAPPQK                | 1 |

|                                                                                                                                   |      |       |      |      |   |   |  |   |                                           |   |
|-----------------------------------------------------------------------------------------------------------------------------------|------|-------|------|------|---|---|--|---|-------------------------------------------|---|
|                                                                                                                                   |      |       |      |      |   |   |  | 2 | AYHEQLSVAEITNAC[330]FEPANQM[147]VK        | 2 |
|                                                                                                                                   |      |       |      |      |   |   |  | 3 | LSDQC[330]TGLQGFLVFHSGGGTSGGFTSLLMER      | 1 |
|                                                                                                                                   |      |       |      |      |   |   |  | 2 | LISQIVSSITASLR                            | 1 |
|                                                                                                                                   |      |       |      |      |   |   |  | 2 | YMAC[330]C[330]LLYR                       | 1 |
|                                                                                                                                   |      |       |      |      |   |   |  | 2 | SIQFVDWC[339]PTGFK                        | 1 |
| TBA1_HUMAN (P68366) Tubulin alpha-1 chain<br>(Alpha-tubulin 1) (Testis-specific alpha-tubulin)<br>(Tubulin H2-alpha) [MASS=49924] | 1.00 | 20.54 | 0.72 | 0.22 | 8 | 5 |  | 2 | YM[147]AC[339]C[339]LLYR                  | 1 |
|                                                                                                                                   |      |       |      |      |   |   |  | 1 | SIQFVDWC[339]PTGFK                        | 1 |
|                                                                                                                                   |      |       |      |      |   |   |  | 3 | LSDQC[339]TGLQGFLVFHSGGGTSGGFTSLLM[147]ER | 1 |
|                                                                                                                                   |      |       |      |      |   |   |  | 2 | AYHEQLSVAEITNAC[339]FEPANQM[147]VK        | 1 |
|                                                                                                                                   |      |       |      |      |   |   |  | 3 | LSDQC[330]TGLQGFLVFHSGGGTSGGFTSLLM[147]ER | 4 |
| TBA2_HUMAN (Q13748) Tubulin alpha-2 chain<br>(Alpha-tubulin 2) [MASS=49959]                                                       | 1.00 | 4.89  | *    | *    | * | 2 |  | 2 | TIQFVDWC[330]PTGFK                        | 1 |
|                                                                                                                                   |      |       |      |      |   |   |  | 2 | YM[147]AC[330]C[330]M[147]LYR             | 1 |
|                                                                                                                                   |      |       |      |      |   |   |  | 3 | LADQC[330]TGLQGFLVFHSGGGTSGGFTSLLMER      | 2 |
| TBA3_HUMAN (Q71U36) Tubulin alpha-3<br>chain (Alpha-tubulin 3) (Tubulin B-alpha-1)<br>[MASS=50135]                                | 1.00 | 7.10  | 1.07 | 0.02 | 8 | 1 |  | 3 | LADQC[339]TGLQGFLVFHSGGGTSGGFTSLLMER      | 3 |
|                                                                                                                                   |      |       |      |      |   |   |  | 3 | LADQC[330]TGLQGFLVFHSGGGTSGGFTSLLM[147]ER | 2 |
| TBA6_HUMAN (Q9BQE3) Tubulin alpha-6<br>chain (Alpha-tubulin 6) [MASS=49895]                                                       | 1.00 | 5.35  | 0.51 | 0.00 | 1 | 1 |  | 3 | AYHEQLTVAEITNAC[330]FEPANQM[147]VK        | 1 |
| TBA8_HUMAN (Q9NY65) Tubulin alpha-8<br>chain (Alpha-tubulin 8) [MASS=50093]                                                       | 1.00 | 5.35  | *    | *    | * | 1 |  | 3 | AYHEQLSVAEITSSC[330]FEPNSQMVK             | 1 |
| TBB1_HUMAN (Q9H4B7) Tubulin beta-1 chain<br>[MASS=50327]                                                                          | *    | 6.87  | *    | *    | * | 2 |  | 3 | FPGQLNADLRKLVNLM[147]VPFPR                | 1 |
|                                                                                                                                   |      |       |      |      |   |   |  | 2 | VSEHFSAM[147]FK                           | 1 |

|                                                                                |      |       |      |      |    |  |   |   |                                                  |   |
|--------------------------------------------------------------------------------|------|-------|------|------|----|--|---|---|--------------------------------------------------|---|
|                                                                                |      |       |      |      |    |  |   | 3 | LTTPTYGDLNHLVSATM[147]SGVTTC[330]LR              | 1 |
|                                                                                |      |       |      |      |    |  |   | 2 | NM[147]MAAC[330]DPR                              | 1 |
|                                                                                |      |       |      |      |    |  |   | 3 | EAESC[339]DC[339]LQGFQLTHSLGGGTGSGMGTLISK        | 2 |
|                                                                                |      |       |      |      |    |  |   | 2 | NM[147]M[147]AAC[339]DPRHGR                      | 1 |
|                                                                                |      |       |      |      |    |  |   | 3 | KEAESC[339]DC[339]LQGFQLTHSLGGGTGSGMGTLISK       | 1 |
|                                                                                |      |       |      |      |    |  |   | 2 | LTTPTYGDLNHLVSATM[147]SGVTTC[339]LR              | 2 |
|                                                                                |      |       |      |      |    |  |   | 1 | TAVC[330]DIPPR                                   | 1 |
|                                                                                |      |       |      |      |    |  |   | 2 | LTTPTYGDLNHLVSATM[147]SGVTTC[330]LR              | 2 |
|                                                                                |      |       |      |      |    |  |   | 3 | LTTPTYGDLNHLVSATMSGVTTC[330]LR                   | 1 |
|                                                                                |      |       |      |      |    |  |   | 2 | NM[147]M[147]AAC[330]DPR                         | 3 |
| TBB2C_HUMAN (P68371) Tubulin beta-2C chain (Tubulin beta-2 chain) [MASS=49831] | 1.00 | 26.97 | *    | *    | *  |  | 6 | 3 | EAESC[330]DC[330]LQGFQLTHSLGGGTGSGM[147]GTLLISK  | 1 |
|                                                                                |      |       |      |      |    |  |   | 3 | EAESC[339]DC[330]LQGFQLTHSLGGGTGSGM[147]GTLLISK  | 1 |
|                                                                                |      |       |      |      |    |  |   | 2 | TAVC[330]DIPPR                                   | 2 |
|                                                                                |      |       |      |      |    |  |   | 3 | LTTPTYGDLNHLVSATM[147]SGVTTC[339]LR              | 3 |
|                                                                                |      |       |      |      |    |  |   | 2 | TAVC[339]DIPPR                                   | 3 |
|                                                                                |      |       |      |      |    |  |   | 2 | NM[147]M[147]AAC[339]DPR                         | 2 |
|                                                                                |      |       |      |      |    |  |   | 3 | EAESC[339]DC[339]LQGFQLTHSLGGGTGSGM[147]GTLLISK  | 2 |
| TBB2C_HUMAN (P68371) Tubulin beta-2C chain (Tubulin beta-2 chain) [MASS=49831] | 1.00 | 26.97 | *    | *    | *  |  | 6 | 3 | KEAESC[339]DC[339]LQGFQLTHSLGGGTGSGM[147]GTLLISK | 2 |
|                                                                                |      |       |      |      |    |  |   | 2 | EIVHIQAGQC[339]GNQIGAK                           | 3 |
| TBB2_HUMAN (P07437) Tubulin beta-2 chain [MASS=49671]                          | 1.00 | 8.11  | 0.81 | 0.18 | 36 |  | 2 | 2 | EIVHIQAGQC[330]GNQIGAK                           | 2 |
|                                                                                |      |       |      |      |    |  |   | 2 | M[147]REIVHIQAGQC[339]GNQIGAK                    | 1 |
|                                                                                |      |       |      |      |    |  |   | 3 | M[147]REIVHIQAGQC[330]GNQIGAK                    | 1 |
|                                                                                |      |       |      |      |    |  |   | 2 | M[147]REIVHIQAGQC[330]GNQIGAK                    | 2 |
| TBB4_HUMAN                                                                     | 1.00 | 4.05  | *    | *    | *  |  | 1 | 3 | M[147]AATFIGNSTAIQELFKR                          | 1 |

|                                                                                                                                                                       |      |       |      |      |   |   |   |                                                                                                                                                                                                        |                            |
|-----------------------------------------------------------------------------------------------------------------------------------------------------------------------|------|-------|------|------|---|---|---|--------------------------------------------------------------------------------------------------------------------------------------------------------------------------------------------------------|----------------------------|
| TBCD2_HUMAN (Q9BYX2) TBC1 domain family member 2 (Prostate antigen recognized and identified by SEREX) (PARIS-1) [MASS=104165]                                        | 0.00 | 2.73  | 1.10 | 0.00 | 1 | 1 | 3 | DDM[147]EAYRTQNC[339]FLNFEIHQVTKIWR                                                                                                                                                                    | 1                          |
| TBCD4_HUMAN (O60343) TBC1 domain family member 4 (Akt substrate of 160 kDa) (AS160) [MASS=146562]                                                                     | *    | 2.31  | *    | *    | * | 2 | 3 | EDAKPSKDNEAFYNSQK<br>PEAGGC[339]GAPAAR                                                                                                                                                                 | 1<br>1                     |
| TBCD8_HUMAN (O95759) TBC1 domain family member 8 (Vascular Rab-GAP/TBC-containing protein) (AD 3) [MASS=102676]                                                       | 0.00 | 4.91  | 1.56 | 0.00 | 1 | 2 | 2 | AFVSC[339]LDIM[147]YNGEM[147]NEK<br>SPLM[147]HPDALVTAFQQSGSQSPDSRM[147]SR                                                                                                                              | 1<br>1                     |
| TCF20_HUMAN (Q9UGU0) Transcription factor 20 (Stromelysin 1 PDGF-responsive element-binding protein) (SPRE-binding protein) (Nuclear factor SPBP) (AR1) [MASS=211770] | *    | 7.55  | *    | *    | * | 6 | 3 | M[147]SPGRSRGPGGDPHMM[147]NPHM[147]TFSER<br>YHYPC[339]AIDADC[339]LLHEENFSVR<br>LLHSSKEGADKAFNSYAHLSHSQDIK<br>KQQQPPPPPPPPQIPEGSADGEPK<br>VKTETHAETVTAGKEPPGAMTSTTSQK<br>C[330]ELGAVC[339]TIINAEETKLVGR | 1<br>1<br>1<br>1<br>1<br>1 |
| TCGAP_HUMAN (O14559) TC10/CDC42 GTPase-activating protein (Sorting nexin-26) [MASS=137212]                                                                            | *    | 2.33  | *    | *    | * | 1 | 2 | STDSLDPGEGSVQPLPTAGGPSVKGKPGK                                                                                                                                                                          | 1                          |
| TCPH_HUMAN (Q99832) T-complex protein 1 subunit eta (TCP-1-eta) (CCT-eta) (HIV-1 Nef-interacting protein) [MASS=59366]                                                | 0.99 | 12.34 | 0.80 | 0.00 | 1 | 3 | 2 | TATQLAVNK<br>INALTAASEAAC[339]LIVSVDETIKNPR<br>QQLLIGAYAKALEIIPRQLC[339]DNAGFDATNILNK                                                                                                                  | 1<br>1<br>1                |
| TCPQ_HUMAN (P50990) T-complex protein 1 subunit theta (TCP-1-theta) (CCT-theta) (NY-REN-15 antigen) [MASS=59489]                                                      | 0.92 | 9.87  | 0.46 | 0.00 | 1 | 3 | 3 | ALHVPKAPGFAQMLK<br>ELAQTTRTAYGPNGM[147]NKM[147]VINHLEK<br>AHEILPNLVC[330]C[330]SAK                                                                                                                     | 1<br>1<br>1                |
| TCRG1_HUMAN (O14776) Transcription elongation regulator 1 (TATA box-binding protein-associated factor 2S) (Transcription factor CA150) [MASS=123959]                  | *    | 1.18  | *    | *    | * | 1 | 2 | ADVDKIIQEPCHK                                                                                                                                                                                          | 1                          |
| TDG_HUMAN (Q13569) G/T mismatch-specific thymine DNA glycosylase (EC 3.2.2.-) [MASS=46053]                                                                            | 0.00 | 5.61  | 0.79 | 0.00 | 1 | 1 | 2 | C[330]LFMSGLSEVQLNHMDHTLPGK                                                                                                                                                                            | 1                          |
| TDRD6_HUMAN (O60522) Tudor domain-containing protein 6 (Aantigen NY-CO-45) (Fragment) [MASS=85665]                                                                    | *    | 3.85  | *    | *    | * | 1 | 3 | MSLHLHGADC[339]DPKTQNEM[147]NIC[330]EEEFVEYK                                                                                                                                                           | 1                          |
| TDRKH_HUMAN (Q9Y2W6) Tudor and KH domain-containing protein [MASS=67024]                                                                                              | *    | 1.65  | *    | *    | * | 1 | 2 | IIGRGGETIR                                                                                                                                                                                             | 1                          |

|                                                                                                                                                                                                                   |      |       |      |      |   |   |                                                                                                                             |                         |   |
|-------------------------------------------------------------------------------------------------------------------------------------------------------------------------------------------------------------------|------|-------|------|------|---|---|-----------------------------------------------------------------------------------------------------------------------------|-------------------------|---|
| TEBP_HUMAN (Q15185) Prostaglandin E synthase 3 (EC 5.3.99.3) (Cytosolic prostaglandin E2 synthase) (cPGES) (Telomerase-binding protein p23) (Hsp90 co-chaperone) (Progesterone receptor complex p23) [MASS=18697] | 0.99 | 10.62 | 0.84 | 0.00 | 1 | 1 | 2                                                                                                                           | HLNEIDL FHC[330]IDPNDSK | 1 |
| TENR_HUMAN (Q92752) Tenascin-R precursor (TN-R) (Restrictin) (Janusin) [MASS=149547]                                                                                                                              | 0.51 | 1.47  | 0.79 | 0.00 | 1 | 2 | 2 C[330]PTDC[330]SSR<br>2 C[339]PTDC[339]SSR<br>3 GHEFSIPFVEM[147]K<br>1 VGISSR                                             | 1<br>1<br>1<br>5        |   |
| TEP1_HUMAN (Q99973) Telomerase protein component 1 (Telomerase-associated protein 1) (Telomerase protein 1) (p240) (p80 telomerase homolog) [MASS=290413]                                                         | 0.00 | 0.80  | *    | *    | * | 2 | 3 C[330]SPEGEWTTGNM[147]WQK                                                                                                 | 1                       |   |
| TESK2_HUMAN (Q96S53) Dual specificity testis-specific protein kinase 2 (EC 2.7.12.1) (Testicular protein kinase 2) [MASS=63639]                                                                                   | 0.00 | 6.83  | 0.54 | 0.00 | 1 | 2 | 3 SLPGSPEFLHQEAC[330]PFVGR<br>2 M[147]NTLSSNRANMLKEVQLM[147]NR                                                              | 1<br>1                  |   |
| TEX15_HUMAN (Q9BXT5) Testis-expressed sequence 15 protein [MASS=315360]                                                                                                                                           | 0.00 | 2.62  | 0.77 | 0.00 | 1 | 4 | 2 IPTLQINKLQPTETESDKYMK<br>3 ISLYGLEHIFFDAAKNLVWK<br>3 PGILGVNHTPILPAHSETC[330]K<br>2 ISLYGLEHIFFDAAKNLVWK<br>2 DQNIPHKDLRR | 1<br>1<br>1<br>1<br>1   |   |
| TEX9_HUMAN (Q8N6V9) Testis-expressed sequence 9 protein [MASS=44826]                                                                                                                                              | 0.00 | 6.39  | 1.02 | 0.00 | 1 | 2 | 2 LHVM[147]QEELDNVVC[330]EC[330]NK<br>1 GELM[147]IGFK                                                                       | 1<br>2                  |   |
| TF7L1_HUMAN (Q9HCS4) Transcription factor 7-like 1 (HMG box transcription factor 3) (TCF-3) [MASS=62630]                                                                                                          | 0.00 | 3.23  | *    | *    | * | 1 | 2 VVAEC[330]TLKESAINQILGR                                                                                                   | 1                       |   |
| TF7L2_HUMAN (Q9NQB0) Transcription factor 7-like 2 (HMG box transcription factor 4) (T-cell-specific transcription factor 4) (TCF-4) (hTCF-4) [MASS=67918]                                                        | 0.00 | 5.49  | *    | *    | * | 2 | 1 RQDGGLFK<br>3 SSLVNESETNQNSSDSEAERRPPPR                                                                                   | 1<br>1                  |   |
| THAP6_HUMAN (Q8TBB0) THAP domain-containing protein 6 [MASS=25690]                                                                                                                                                | 0.00 | 5.86  | 0.31 | 0.00 | 1 | 1 | 2 M[147]VKC[330]C[330]SAIGC[330]ASR                                                                                         | 1                       |   |
| THIL_HUMAN (P24752) Acetyl-CoA acetyltransferase, mitochondrial precursor (EC 2.3.1.9) (Acetoacetyl-CoA thiolase) (T2) [MASS=45199]                                                                               | 1.00 | 10.77 | 1.46 | 0.08 | 3 | 2 | 2 IHMGSC[339]AENTAK<br>2 IHM[147]GSC[339]AENTAK<br>3 AIM[147]M[147]ASQSLM[147]C[339]GHQDVMVAGGMESMSNPYVMNR                  | 1<br>1<br>1             |   |



|                                                                                                                                                                                                                   |      |       |      |      |   |   |   |                                               |   |
|-------------------------------------------------------------------------------------------------------------------------------------------------------------------------------------------------------------------|------|-------|------|------|---|---|---|-----------------------------------------------|---|
| THIM_HUMAN (P42765) 3-ketoacyl-CoA thiolase, mitochondrial (EC 2.3.1.16) (Beta-ketothiolase) (Acetyl-CoA acyltransferase) (Mitochondrial 3-oxoacyl-CoA thiolase) (T1) [MASS=41924]                                | 1.00 | 15.87 | 1.69 | 0.05 | 2 | 3 | 3 | ISREEC[339]DKYALQSQQR                         | 1 |
|                                                                                                                                                                                                                   |      |       |      |      |   |   | 3 | IVGYFVSGC[339]DPSIM[147]GIGPVP AISGALKKAGLSLK | 1 |
|                                                                                                                                                                                                                   |      |       |      |      |   |   | 2 | EEC[339]DKYALQSQQR                            | 1 |
| THRB_HUMAN (P00734) Prothrombin precursor (EC 3.4.21.5) (Coagulation factor II) [Contains: Activation peptide fragment 1; Activation peptide fragment 2; Thrombin light chain; Thrombin heavy chain] [MASS=70036] | 0.00 | 5.47  | 0.89 | 0.00 | 1 | 2 | 2 | WYQM[147]GIVSWGEGC[339]DR                     | 1 |
|                                                                                                                                                                                                                   |      |       |      |      |   |   | 2 | SEGSSVNLSPPLEQC[339]VPDR                      | 1 |
| THY1_HUMAN (P04216) Thy-1 membrane glycoprotein precursor (Thy-1 antigen) (CD90 antigen) (CDw90 antigen) [MASS=17935]                                                                                             | 0.99 | 8.70  | 0.48 | 0.00 | 1 | 1 | 2 | VTSLTAC[330]LVDQSLR                           | 1 |
| TIM10_HUMAN (P62072) Mitochondrial import inner membrane translocase subunit Tim10 [MASS=10333]                                                                                                                   | 0.39 | 56.67 | 1.54 | 0.00 | 1 | 3 | 3 | AQQLAAEELEVEMM[147]ADMYNRMTSAC[330]HRK        | 1 |
|                                                                                                                                                                                                                   |      |       |      |      |   |   | 2 | C[339]VPPHYK                                  | 1 |
|                                                                                                                                                                                                                   |      |       |      |      |   |   | 2 | MGKLTLSM[147]QDEELM[147]K                     | 1 |
| TIM13_HUMAN (Q9Y5L4) Mitochondrial import inner membrane translocase subunit Tim13 [MASS=10500]                                                                                                                   | 1.00 | 34.74 | 1.36 | 0.19 | 3 | 2 | 2 | C[330]IGKPGGSLDNSEQK                          | 1 |
|                                                                                                                                                                                                                   |      |       |      |      |   |   | 2 | C[339]IGKPGGSLDNSEQK                          | 1 |
|                                                                                                                                                                                                                   |      |       |      |      |   |   | 2 | C[330]IAMC[330]MDRYMDAWNTVSR                  | 1 |
| TIM9_HUMAN (Q9Y5J7) Mitochondrial import inner membrane translocase subunit Tim9 [MASS=10378]                                                                                                                     | 1.00 | 35.96 | 1.53 | 0.02 | 3 | 2 | 2 | EVKPEETTC[339]SEHC[339]LQK                    | 1 |
|                                                                                                                                                                                                                   |      |       |      |      |   |   | 3 | EVKPEETTC[330]SEHC[330]LQK                    | 1 |
|                                                                                                                                                                                                                   |      |       |      |      |   |   | 2 | LTETC[339]FLDC[339]VKDFTR                     | 1 |
| TKT_HUMAN (P29401) Transketolase (EC 2.2.1.1) (TK) [MASS=67877]                                                                                                                                                   | *    | 3.85  | *    | *    | * | 2 | 1 | GLITKA                                        | 1 |
|                                                                                                                                                                                                                   |      |       |      |      |   |   | 2 | GITGVEDKESWHGKPLPK                            | 1 |
| TLN2_HUMAN (Q9Y4G6) Talin-2 [MASS=271553]                                                                                                                                                                         | 0.98 | 1.85  | 1.43 | 0.00 | 1 | 3 | 2 | LARSLR TYGVSFFLVK                             | 1 |
|                                                                                                                                                                                                                   |      |       |      |      |   |   | 2 | HTSALC[330]NAC[330]R                          | 1 |
|                                                                                                                                                                                                                   |      |       |      |      |   |   | 3 | HC[339]NVVKTM[147]QFEPSTAVYDAC[330]R          | 1 |
| TLR4_HUMAN (O00206) Toll-like receptor 4 precursor (hToll) (CD284 antigen) [MASS=95679]                                                                                                                           | 0.00 | 6.08  | 0.49 | 0.00 | 1 | 2 | 3 | TC[330]IQGLAGLEVHRLV LGEFRNEGNLEK             | 1 |
|                                                                                                                                                                                                                   |      |       |      |      |   |   | 3 | QQVELYRLLSRNTYLEWEDSVLGR                      | 1 |
| TLR5_HUMAN (O60602) Toll-like receptor 5 precursor (Toll/interleukin-1 receptor-like protein 3) [MASS=97725]                                                                                                      | 0.00 | 2.80  | 1.48 | 0.00 | 1 | 1 | 2 | C[339]LSDLNSALIMVVVGSLSQYQLMK                 | 1 |
| TMEM8_HUMAN (Q9HCN3) Transmembrane protein 8 precursor (M83 protein) [MASS=84716]                                                                                                                                 | 0.00 | 10.51 | 0.82 | 0.00 | 1 | 3 | 2 | AATLLLTLSNLM[147]FLAPIAVSVR                   | 1 |
|                                                                                                                                                                                                                   |      |       |      |      |   |   | 3 | GMWNMLGPC[330]LFAFVIM[147]ASMWAYR             | 1 |
|                                                                                                                                                                                                                   |      |       |      |      |   |   | 3 | AGTGTGGEAVAAVVAGPLLLLLLARPPPASAGYS GK         | 1 |
| TMM27_HUMAN (Q9HBJ8) Collectrin precursor (Transmembrane protein 27) [MASS=25235]                                                                                                                                 | *    | 13.06 | *    | *    | * | 1 | 3 | VSFWFVVTDP SKNHTLPAVEVQSAIRMNK                | 1 |

|                                                                                                                                                                                                                                                            |                           |       |      |      |   |   |   |                                                 |   |
|------------------------------------------------------------------------------------------------------------------------------------------------------------------------------------------------------------------------------------------------------------|---------------------------|-------|------|------|---|---|---|-------------------------------------------------|---|
| TMM51_HUMAN (Q9NW97) Transmembrane protein 51 [MASS=27759]                                                                                                                                                                                                 | *                         | 11.07 | *    | *    | * | 1 | 3 | INLPDKNVPPPSIEPLTPPPQYDEVQEK                    | 1 |
| TMPS9_HUMAN (Q7Z410) Transmembrane protease, serine 9 (EC 3.4.21.-) (Polyserase-1) (Polyserase-I) (Polyserine protease 1) [Contains: Serase-1; Serase-2; Serase-3] [MASS=114020]                                                                           | *                         | 9.25  | *    | *    | * | 5 | 2 | ARLREHGISLAAYGTIVSAELTGR                        | 1 |
|                                                                                                                                                                                                                                                            |                           |       |      |      |   |   | 3 | MEPTVADVHLVPRTTKEVPALDAAC[339]C[339]R           | 1 |
|                                                                                                                                                                                                                                                            |                           |       |      |      |   |   | 2 | C[339]VITGWGVSREGGSM[147]AR                     | 1 |
|                                                                                                                                                                                                                                                            |                           |       |      |      |   |   | 3 | WLLSAAHC[330]FNHTKVEQVR                         | 1 |
|                                                                                                                                                                                                                                                            |                           |       |      |      |   |   | 2 | EDFLVKPEVLQK                                    | 1 |
| TNK1_HUMAN (Q13470) Non-receptor tyrosine protein kinase TNK1 (EC 2.7.10.2) (CD38 negative kinase 1) [MASS=72499]                                                                                                                                          | *                         | 16.07 | *    | *    | * | 6 | 2 | QARAVPQGPPGLPPR                                 | 1 |
|                                                                                                                                                                                                                                                            |                           |       |      |      |   |   | 2 | SLESVLSLGPRTGGGSSPPEIRQAR                       | 1 |
|                                                                                                                                                                                                                                                            |                           |       |      |      |   |   | 3 | QLAGAM[147]AYLGAR                               | 1 |
|                                                                                                                                                                                                                                                            |                           |       |      |      |   |   | 2 | VGSFPASAVTLADAGGLPATR                           | 1 |
|                                                                                                                                                                                                                                                            |                           |       |      |      |   |   | 2 | PEHFDFVK                                        | 1 |
| 3                                                                                                                                                                                                                                                          | NWVYKILGGFAPEHKEPTLPSDSPR | 1     |      |      |   |   |   |                                                 |   |
| TOM40_HUMAN (O96008) Probable mitochondrial import receptor subunit TOM40 homolog (Translocase of outer membrane 40 kDa subunit homolog) (Haymaker protein) (p38.5) [MASS=37893]                                                                           | 0.80                      | 14.96 | 0.99 | 0.00 | 1 | 2 | 3 | TPGAATASASGAAEDGAC[339]GC[339]LPNPGTFEEC[339]HR | 1 |
|                                                                                                                                                                                                                                                            |                           |       |      |      |   |   | 2 | ANLLFKGSVDSNWIVGATLEKK                          | 1 |
| TOM70_HUMAN (O94826) Mitochondrial precursor proteins import receptor (Translocase of outer membrane TOM70) [MASS=67454]                                                                                                                                   | 1.00                      | 11.02 | 0.69 | 0.57 | 5 | 3 | 3 | ADEM[147]YDKC[339]IDLEPDNATTYVHK                | 1 |
|                                                                                                                                                                                                                                                            |                           |       |      |      |   |   | 3 | C[339]DFAYETMGTIIEVQRGNM[147]EKAIDMFNK          | 1 |
|                                                                                                                                                                                                                                                            |                           |       |      |      |   |   | 3 | ILLDQVEEAVADFDEC[339]IR                         | 2 |
| 3                                                                                                                                                                                                                                                          | ILLDQVEEAVADFDEC[330]IR   | 2     |      |      |   |   |   |                                                 |   |
| TOP3B_HUMAN (O95985) DNA topoisomerase 3-beta-1 (EC 5.99.1.2) (DNA topoisomerase III beta-1) [MASS=96661]                                                                                                                                                  | 0.00                      | 2.67  | 1.07 | 0.00 | 1 | 1 | 3 | GLNGAC[339]SVHEYTGTFAGQPVRFK                    | 1 |
| TP53B_HUMAN (Q12888) Tumor suppressor p53-binding protein 1 (p53-binding protein 1) (p53BP1) (53BP1) [MASS=213573]                                                                                                                                         | *                         | 1.12  | *    | *    | * | 1 | 3 | QSQQPM[147]KPISPVKDPVSPASQK                     | 1 |
| TPA_HUMAN (P00750) Tissue-type plasminogen activator precursor (EC 3.4.21.68) (tPA) (t-PA) (t-plasminogen activator) (Alteplase) (Reteplase) [Contains: Tissue-type plasminogen activator chain A; Tissue-type plasminogen activator chain B] [MASS=62917] | *                         | 1.96  | *    | *    | * | 1 | 3 | RGARSYQVIC[339]R                                | 2 |

|                                                                                                                                                                                                         |      |       |      |      |   |   |   |                                             |   |
|---------------------------------------------------------------------------------------------------------------------------------------------------------------------------------------------------------|------|-------|------|------|---|---|---|---------------------------------------------|---|
| TPIS_HUMAN (P60174) Triosephosphate isomerase (EC 5.3.1.1) (TIM) (Triose-phosphate isomerase) [MASS=26538]                                                                                              | 1.00 | 7.26  | 0.61 | 0.24 | 3 | 1 | 1 | VAHALAEGLGVIAC[330]IGEK                     | 1 |
|                                                                                                                                                                                                         |      |       |      |      |   |   | 2 | VAHALAEGLGVIAC[339]IGEK                     | 1 |
|                                                                                                                                                                                                         |      |       |      |      |   |   | 2 | VAHALAEGLGVIAC[330]IGEK                     | 1 |
|                                                                                                                                                                                                         |      |       |      |      |   |   | 1 | KSSNLTLPK                                   | 2 |
| TPP2_HUMAN (P29144) Tripeptidyl-peptidase 2 (EC 3.4.14.10) (Tripeptidyl-peptidase II) (TPP-II) (Tripeptidyl aminopeptidase) [MASS=138218]                                                               | 0.00 | 7.05  | *    | *    | * | 6 | 3 | EKIWDPVHRVALAEAC[339]R                      | 1 |
|                                                                                                                                                                                                         |      |       |      |      |   |   | 2 | ANNIDYTVHSVRR                               | 1 |
|                                                                                                                                                                                                         |      |       |      |      |   |   | 3 | ANNIDYTVHSVR                                | 1 |
|                                                                                                                                                                                                         |      |       |      |      |   |   | 3 | NDMDKQKSTLVDALC[339]R                       | 1 |
|                                                                                                                                                                                                         |      |       |      |      |   |   | 2 | FC[339]SLPEKGTLEAFPVLGGK                    | 1 |
| TPPC5_HUMAN (Q8IUR0) Trafficking protein particle complex subunit 5 [MASS=20783]                                                                                                                        | 0.00 | 14.36 | 1.70 | 0.00 | 1 | 1 | 3 | ENSTLNC[339]ASFTAGIVEAVLTHSGFPAK            | 1 |
| TR4_HUMAN (P49116) Orphan nuclear receptor TR4 (Orphan nuclear receptor TAK1) [MASS=65414]                                                                                                              | *    | 1.51  | *    | *    | * | 1 | 2 | LLGKTDVQR                                   | 4 |
| TRABD_HUMAN (Q9UGI0) Protein TRABID (Zinc finger Ran-binding domain-containing protein 1) [MASS=80907]                                                                                                  | *    | 6.78  | *    | *    | * | 2 | 3 | SPIALGYTRGHFSALVAMENDGYGNR                  | 1 |
|                                                                                                                                                                                                         |      |       |      |      |   |   | 3 | ELEEEESPIINWSLELATRLDSR                     | 1 |
| TRFR_HUMAN (P34981) Thyrotropin-releasing hormone receptor (TRH-R) (Thyroliberin receptor) [MASS=45085]                                                                                                 | 0.00 | 14.32 | 0.34 | 0.00 | 1 | 2 | 3 | IIIFVWAFTSLYC[330]MLWFFLLDLNISTYK           | 1 |
|                                                                                                                                                                                                         |      |       |      |      |   |   | 3 | KIIIFVWAFTSLYC[330]MLWFFLLDLNISTYK          | 1 |
| TRI18_HUMAN (O15344) Midline-1 (EC 6.3.2.-) (Tripartite motif-containing protein 18) (Putative transcription factor XPRF) (Midin) (RING finger protein 59) (Midline 1 RING finger protein) [MASS=75250] | *    | 3.45  | *    | *    | * | 1 | 3 | VNM[147]YC[339]VTDDQLIC[330]ALC[330]KLVGRHR | 1 |
| TRI27_HUMAN (P14373) Zinc-finger protein RFP (Ret finger protein) (Tripartite motif-containing protein 27) (RING finger protein 76) [MASS=58489]                                                        | 0.00 | 2.92  | 5.51 | 0.00 | 1 | 1 | 2 | C[339]WGTAETNVSC[339]PQC[339]R              | 1 |
| TRI32_HUMAN (Q13049) Tripartite motif-containing protein 32 (EC 6.3.2.-) (Zinc-finger protein HT2A) (72 kDa Tat-interacting protein) [MASS=71988]                                                       | *    | 2.30  | *    | *    | * | 1 | 3 | VGHVGPLQIGQAVKK                             | 1 |
| TRIM4_HUMAN (Q9C037) Tripartite motif-containing protein 4 (RING finger protein 87) [MASS=57400]                                                                                                        | 0.00 | 7.60  | 0.50 | 0.00 | 1 | 2 | 2 | TAFVERFQHLPC[330]VLGKNVFTSGK                | 1 |
|                                                                                                                                                                                                         |      |       |      |      |   |   | 2 | LFC[339]EDDQRPVC[330]LVC[339]R              | 1 |

|                                                                                                                                                                                             |              |       |      |      |   |    |   |                                                   |   |
|---------------------------------------------------------------------------------------------------------------------------------------------------------------------------------------------|--------------|-------|------|------|---|----|---|---------------------------------------------------|---|
| TRIO_HUMAN (O75962) Triple functional domain protein (PTPRF-interacting protein) [MASS=341614]                                                                                              | 0.00         | 6.78  | 0.89 | 0.00 | 1 | 11 | 3 | NMIEEHSQLKK                                       | 1 |
|                                                                                                                                                                                             |              |       |      |      |   |    | 2 | YLYKSKLFTSELGVTEHVEGDPC[339]JK                    | 1 |
|                                                                                                                                                                                             |              |       |      |      |   |    | 3 | NHSGGGGGGGSGGSGGGGGSGGGGAPSGSGHSGGPSSC[330]GGAPST | 1 |
|                                                                                                                                                                                             |              |       |      |      |   |    | 3 | SR                                                | 1 |
|                                                                                                                                                                                             |              |       |      |      |   |    | 2 | GQTVEVLER                                         | 1 |
|                                                                                                                                                                                             |              |       |      |      |   |    | 2 | AEAM[147]LQANHYDM[147]DMIRDC[330]AEK              | 1 |
|                                                                                                                                                                                             |              |       |      |      |   |    | 2 | NSGSGNADLQNLKPKVSTMLDR                            | 1 |
|                                                                                                                                                                                             |              |       |      |      |   |    | 3 | ELLTC[330]C[330]EEGKGEIKDGLVEM[147]LSVPK          | 1 |
|                                                                                                                                                                                             |              |       |      |      |   |    | 2 | MKAM[147]DVLPIKKEK                                | 1 |
|                                                                                                                                                                                             |              |       |      |      |   |    | 3 | PPGADAEGSERAIEPIPK                                | 1 |
| 2                                                                                                                                                                                           | AVATKFNK     | 1     |      |      |   |    |   |                                                   |   |
| 2                                                                                                                                                                                           | LLDC[330]VVR | 1     |      |      |   |    |   |                                                   |   |
| TRIP4_HUMAN (Q15650) Activating signal cointegrator 1 (ASC-1) (Thyroid receptor-interacting protein 4) (TRIP-4) [MASS=66245]                                                                | 0.00         | 14.46 | 1.35 | 0.00 | 1 | 4  | 2 | HPC[330]DC[330]LGQKHKLINNC[330]LIC[330]GR         | 1 |
|                                                                                                                                                                                             |              |       |      |      |   |    | 3 | IHQGAKKGLM[147]K                                  | 1 |
|                                                                                                                                                                                             |              |       |      |      |   |    | 3 | DVEFPNDYPSGC[339]LLGC[339]VDLIDC[339]LSQKQFK      | 1 |
|                                                                                                                                                                                             |              |       |      |      |   |    | 2 | LWIAATAKKPSPQEVSELQATYR                           | 1 |
| TRPM7_HUMAN (Q96QT4) Transient receptor potential cation channel subfamily M member 7 (EC 2.7.11.1) (Long transient receptor potential channel 7) (LTrpC7) (Channel-kinase 1) [MASS=212696] | 0.00         | 1.29  | 0.97 | 0.00 | 1 | 1  | 3 | DQETVC[339]SKATEGDNTEFGAFVGH                      | 1 |
| TSC2_HUMAN (P49815) Tuberin (Tuberous sclerosis 2 protein) [MASS=200748]                                                                                                                    | *            | 1.33  | *    | *    | * | 1  | 3 | AQSIHPAKDGWIQNLQALMERFFR                          | 1 |
| TSH1_HUMAN (Q6ZSZ6) Teashirt homolog 1 (Serologically defined colon cancer antigen 3) (Antigen NY-CO-33) [MASS=117916]                                                                      | *            | 2.32  | *    | *    | * | 1  | 3 | VLKC[330]M[147]YC[339]GHSFESLQDLSVHM[147]IKTK     | 1 |
| TSH3_HUMAN (Q63HK5) Teashirt homolog 3 (Zinc finger protein 537) [MASS=118565]                                                                                                              | 0.00         | 2.50  | 1.85 | 0.00 | 1 | 1  | 2 | GC[330]SLGSVLLSPTSTAPATSSSTVTTAK                  | 1 |
| TSN18_HUMAN (Q96SJ8) Tetraspanin-18 (Tspan-18) [MASS=27710]                                                                                                                                 | *            | 5.24  | *    | *    | * | 1  | 3 | REPQSRDGVLLSR                                     | 1 |
| TSP2_HUMAN (P35442) Thrombospondin-2 precursor [MASS=129955]                                                                                                                                | 0.00         | 5.55  | 2.76 | 0.00 | 1 | 3  | 3 | GTLLALEGPGLSQR                                    | 1 |
|                                                                                                                                                                                             |              |       |      |      |   |    | 3 | DGIGDAC[330]DDDDNDNGVTEKDNC[339]QLLFNPR           | 1 |
|                                                                                                                                                                                             |              |       |      |      |   |    | 3 | VC[339]NSPEPQYGGKAC[339]VGDVQER                   | 1 |
| TTC3_HUMAN (P53804) Tetratricopeptide repeat protein 3 (TPR repeat protein 3) (TPR repeat protein D) [MASS=229890]                                                                          | *            | 3.11  | *    | *    | * | 3  | 3 | PFLGCG[330]PRFVVIDNC[339]IALKK                    | 1 |
|                                                                                                                                                                                             |              |       |      |      |   |    | 2 | SHC[339]STGDAHTVLSSENR                            | 1 |
|                                                                                                                                                                                             |              |       |      |      |   |    | 3 | NLEFDIC[339]SIWC[330]SKPISVLQDYC[339]DAIK         | 1 |

|                                                                                                                                                                                                           |      |       |      |      |   |   |                                                                                                         |                                   |   |
|-----------------------------------------------------------------------------------------------------------------------------------------------------------------------------------------------------------|------|-------|------|------|---|---|---------------------------------------------------------------------------------------------------------|-----------------------------------|---|
| TULP1_HUMAN (O00294) Tubby-related protein 1 (Tubby-like protein 1) [MASS=60650]                                                                                                                          | 0.00 | 4.24  | 0.33 | 0.00 | 1 | 1 | 2                                                                                                       | YPLC[330]ALQAFAlALSSFDGKLAC[330]E | 1 |
| TXND3_HUMAN (Q8N427) Thioredoxin domain-containing protein 3 (Spermatid-specific thioredoxin-2) (Sptrx-2) (NM23-H8) [MASS=67269]                                                                          | *    | 1.02  | *    | *    | * | 1 | 1                                                                                                       | KM[147]KSMK                       | 1 |
| U3IP2_HUMAN (O43818) U3 small nucleolar RNA-interacting protein 2 (U3 small nucleolar ribonucleoprotein-associated 55 kDa protein) (U3 snoRNP-associated 55 kDa protein) (U3-55K) [MASS=51840]            | 0.00 | 13.47 | 1.47 | 0.00 | 1 | 3 | 2 EC[339]C[339]VTAGGRDGTVR<br>2 GAEGKPPGHSSHVLC[339]M[147]AISSDGK<br>3 PPGHSSHVLC[330]MAISSDGKYLASGDRSK | 1<br>1<br>1                       |   |
| UAP56_HUMAN (Q13838) Spliceosome RNA helicase BAT1 (EC 3.6.1.-) (DEAD box protein UAP56) (56 kDa U2AF65-associated protein) (ATP-dependent RNA helicase p47) (HLA-B-associated transcript-1) [MASS=48991] | 0.97 | 6.78  | 0.81 | 0.00 | 1 | 2 | 2 NC[330]PHIVVGTGTPGR<br>2 HFILDEC[339]DKM[147]LEQLDM[147]R                                             | 1<br>1                            |   |
| UBE1_HUMAN (P22314) Ubiquitin-activating enzyme E1 (A1S9 protein) [MASS=117848]                                                                                                                           | 0.94 | 0.76  | 1.01 | 0.00 | 1 | 1 | 2 VGEFC[330]HNR                                                                                         | 1                                 |   |
| UBE3C_HUMAN (Q15386) Ubiquitin-protein ligase E3C (EC 6.3.2.-) [MASS=123922]                                                                                                                              | *    | 3.97  | *    | *    | * | 2 | 3 HLWFLISSMSTRMITGSMVPLLQVISR<br>2 NFC[330]PPNHWLSEQEDIK                                                | 1<br>1                            |   |
| UBP28_HUMAN (Q96RU2) Ubiquitin carboxyl-terminal hydrolase 28 (EC 3.1.2.15) (Ubiquitin thioesterase 28) (Ubiquitin-specific-processing protease 28) (Deubiquitinating enzyme 28) [MASS=122490]            | 0.00 | 5.20  | 1.52 | 0.00 | 1 | 3 | 3 NKSENPMVQLFYGTFLTEGVR<br>3 EIGPDDMNM[147]EEYK<br>3 RLVLSYSLPQNVLENC[330]RSHTEK                        | 1<br>1<br>1                       |   |
| UBP38_HUMAN (Q8NB14) Ubiquitin carboxyl-terminal hydrolase 38 (EC 3.1.2.15) (Ubiquitin thioesterase 38) (Ubiquitin-specific-processing protease 38) (Deubiquitinating enzyme 38) (HP43.8KD) [MASS=116545] | 0.23 | 2.59  | 1.53 | 0.00 | 1 | 1 | 2 TGLINLGNTC[330]YM[147]NSVIQALFMATDFRR                                                                 | 1                                 |   |

|                                                                                                                                                                                                                                |                                  |       |      |      |   |   |   |                                        |   |
|--------------------------------------------------------------------------------------------------------------------------------------------------------------------------------------------------------------------------------|----------------------------------|-------|------|------|---|---|---|----------------------------------------|---|
| UBP4_HUMAN (Q13107) Ubiquitin carboxyl-terminal hydrolase 4 (EC 3.1.2.15) (Ubiquitin thioesterase 4) (Ubiquitin-specific-processing protease 4) (Deubiquitinating enzyme 4) (Ubiquitous nuclear protein homolog) [MASS=108564] | 0.22                             | 2.39  | 2.63 | 0.00 | 1 | 2 | 2 | LLKLNSR                                | 1 |
|                                                                                                                                                                                                                                |                                  |       |      |      |   |   | 2 | LLNWYGC[339]VEGQQPIVR                  | 1 |
| UBP6_HUMAN (P35125) Ubiquitin carboxyl-terminal hydrolase 6 (EC 3.1.2.15) (Ubiquitin thioesterase 6) (Ubiquitin-specific-processing protease 6) (Deubiquitinating enzyme 6) (Proto-oncogene TRE-2) [MASS=158657]               | 0.00                             | 2.99  | 1.27 | 0.06 | 2 | 2 | 2 | DNC[330]M[147]GYQYPFTLR                | 1 |
|                                                                                                                                                                                                                                |                                  |       |      |      |   |   | 3 | DLC[339]GLNSEQILLAEVHDSNIKNFPQDNQK     | 1 |
| UBR1_HUMAN (Q8I WV7) Ubiquitin-protein ligase E3 component N-recognin-1 (EC 6.-.-) (Ubiquitin-protein ligase E3-alpha-1) (Ubiquitin-protein ligase E3-alpha-I) [MASS=200209]                                                   | *                                | 1.03  | *    | *    | * | 1 | 2 | EC[330]HKAVM[147]RC[330]STSFISSSK      | 1 |
| UBR2_HUMAN (Q8I WV8) Ubiquitin-protein ligase E3 component N-recognin-2 (EC 6.-.-) (Ubiquitin-protein ligase E3-alpha-2) (Ubiquitin-protein ligase E3-alpha-II) [MASS=200537]                                                  | *                                | 1.42  | *    | *    | * | 2 | 2 | LLSWLGSIIIGYSDGLR                      | 1 |
|                                                                                                                                                                                                                                |                                  |       |      |      |   |   | 2 | VSIHLPVSR                              | 1 |
| UBTD2_HUMAN (Q8WUN7) Ubiquitin domain-containing protein 2 (Dendritic cell-derived ubiquitin-like protein) (DC-UbP) (Ubiquitin-like protein SB72) [MASS=26189]                                                                 | 0.00                             | 11.97 | 0.40 | 0.00 | 1 | 1 | 2 | M[147]GGC[330]VGAQHDSSGSLNENSEGTGVALGR | 1 |
| UCHL1_HUMAN (P09936) Ubiquitin carboxyl-terminal hydrolase isozyme L1 (EC 3.4.19.12) (EC 6.-.-) (UCH-L1) (Ubiquitin thioesterase L1) (Neuron cytoplasmic protein 9.5) (PGP 9.5) (PGP9.5) [MASS=24824]                          | 1.00                             | 28.70 | 0.67 | 0.04 | 6 | 3 | 2 | C[330]FEKNEAIQAAHDAVAQEGQC[330]R       | 1 |
|                                                                                                                                                                                                                                |                                  |       |      |      |   |   | 3 | C[339]FEKNEAIQAAHDAVAQEGQC[339]R       | 1 |
|                                                                                                                                                                                                                                |                                  |       |      |      |   |   | 2 | NEAIQAAHDAVAQEGQC[330]R                | 2 |
|                                                                                                                                                                                                                                |                                  |       |      |      |   |   | 3 | NEAIQAAHDAVAQEGQC[330]R                | 1 |
|                                                                                                                                                                                                                                |                                  |       |      |      |   |   | 2 | MPPFVNHGASSEDTLKDAKVC[339]R            | 1 |
| 3                                                                                                                                                                                                                              | C[330]FEKNEAIQAAHDAVAQEGQC[330]R | 1     |      |      |   |   |   |                                        |   |
| UCP4_HUMAN (O95847) Mitochondrial uncoupling protein 4 (UCP 4) (Solute carrier family 25 member 27) [MASS=36064]                                                                                                               | 0.99                             | 16.10 | 0.68 | 0.00 | 1 | 3 | 2 | FLLSGC[330]AATVAELATFPLDLTK            | 1 |
|                                                                                                                                                                                                                                |                                  |       |      |      |   |   | 2 | TRLQM[147]QGEAALAR                     | 1 |
|                                                                                                                                                                                                                                |                                  |       |      |      |   |   | 2 | LQM[147]QGEAALARLGDGAR                 | 1 |

|                                                                                                                                                                                                                                  |      |       |      |      |    |   |  |   |                                          |   |
|----------------------------------------------------------------------------------------------------------------------------------------------------------------------------------------------------------------------------------|------|-------|------|------|----|---|--|---|------------------------------------------|---|
|                                                                                                                                                                                                                                  |      |       |      |      |    |   |  | 2 | EQC[330]EQLEK                            | 2 |
|                                                                                                                                                                                                                                  |      |       |      |      |    |   |  | 2 | LELC[330]DER                             | 1 |
| UCRH_HUMAN (P07919) Ubiquinol-cytochrome c reductase complex 11 kDa protein, mitochondrial precursor (EC 1.10.2.2) (Mitochondrial hinge protein) (Cytochrome C1, nonheme 11 kDa protein) (Complex III subunit VIII) [MASS=10739] | 1.00 | 53.85 | 1.10 | 0.14 | 12 | 5 |  | 2 | EQC[339]EQLEK                            | 2 |
|                                                                                                                                                                                                                                  |      |       |      |      |    |   |  | 2 | ERLELC[330]DER                           | 1 |
|                                                                                                                                                                                                                                  |      |       |      |      |    |   |  | 2 | ERLELC[339]DER                           | 1 |
|                                                                                                                                                                                                                                  |      |       |      |      |    |   |  | 2 | DHC[330]VAHK                             | 2 |
|                                                                                                                                                                                                                                  |      |       |      |      |    |   |  | 2 | DHC[339]VAHK                             | 2 |
|                                                                                                                                                                                                                                  |      |       |      |      |    |   |  | 3 | SHTEEDC[330]TEELDFDLHAR                  | 1 |
| UCRQ_HUMAN (O14949) Ubiquinol-cytochrome c reductase complex ubiquinone-binding protein QP-C (EC 1.10.2.2) (Ubiquinol-cytochrome c reductase complex 9.5 kDa protein) (Complex III subunit VII) [MASS=9775]                      | 0.90 | 16.05 | *    | *    | *  | 1 |  | 2 | HVISYSLSPFEQR                            | 1 |
| UGGG1_HUMAN (Q9NYU2) UDP-glucose:glycoprotein glucosyltransferase 1 precursor (EC 2.4.1.-) (UDP-glucose ceramide glucosyltransferase-like 1) (UDP--Glc:glycoprotein glucosyltransferase) (HUGT1) [MASS=174976]                   | *    | 1.24  | *    | *    | *  | 1 |  | 3 | KYPYVEVNSILGIDSAYDR                      | 1 |
| ULK1_HUMAN (O75385) Serine/threonine-protein kinase ULK1 (EC 2.7.11.1) (Unc-51-like kinase 1) [MASS=112601]                                                                                                                      | *    | 5.14  | *    | *    | *  | 3 |  | 2 | MEPGRGGTETVGKFEFSR                       | 1 |
|                                                                                                                                                                                                                                  |      |       |      |      |    |   |  | 2 | LFLQQIAGAMRLLHSGIIHR                     | 1 |
|                                                                                                                                                                                                                                  |      |       |      |      |    |   |  | 3 | ASVVSC[339]QGLSLRLQR                     | 1 |
| UN13C_HUMAN (Q8NB66) Unc-13 homolog C (Munc13-3) (Fragment) [MASS=135621]                                                                                                                                                        | *    | 1.43  | *    | *    | *  | 1 |  | 2 | MKVLELQSPPKASM[147]VVK                   | 1 |
| UQCR1_HUMAN (P31930) Ubiquinol-cytochrome-c reductase complex core protein I, mitochondrial precursor (EC 1.10.2.2) [MASS=52645]                                                                                                 | 1.00 | 18.33 | 1.24 | 0.06 | 4  | 5 |  | 2 | EHTAYYIK                                 | 1 |
|                                                                                                                                                                                                                                  |      |       |      |      |    |   |  | 2 | NALVSHLDGTTTPVC[339]EDIGR                | 1 |
|                                                                                                                                                                                                                                  |      |       |      |      |    |   |  | 3 | AVELLGDIVQNC[339]SLEDSQIEKER             | 1 |
|                                                                                                                                                                                                                                  |      |       |      |      |    |   |  | 2 | LC[339]TSATESEVAR                        | 1 |
|                                                                                                                                                                                                                                  |      |       |      |      |    |   |  | 3 | LC[339]QSFQTFSC[330]YAETGLLGAHFVC[330]DR | 1 |
|                                                                                                                                                                                                                                  |      |       |      |      |    |   |  | 2 | LC[330]TSATESEVAR                        | 1 |
| UQCR2_HUMAN (P22695) Ubiquinol-cytochrome-c reductase complex core protein 2, mitochondrial precursor (EC 1.10.2.2) (Complex III subunit II) [MASS=48443]                                                                        | 0.99 | 6.18  | 1.31 | 0.00 | 1  | 2 |  | 2 | GIEAVGGKLSVTATR                          | 1 |
|                                                                                                                                                                                                                                  |      |       |      |      |    |   |  | 2 | NALANPLYC[339]PDYR                       | 1 |

|                                                                                                                                                                                                                                              |      |       |      |      |   |   |        |                                                                |        |
|----------------------------------------------------------------------------------------------------------------------------------------------------------------------------------------------------------------------------------------------|------|-------|------|------|---|---|--------|----------------------------------------------------------------|--------|
| VA0D_HUMAN (P61421) Vacuolar ATP synthase subunit d (EC 3.6.3.14) (V-ATPase d subunit) (Vacuolar proton pump d subunit) (V-ATPase AC39 subunit) (V-ATPase 40 kDa accessory protein) (P39) (32 kDa accessory protein) [MASS=40329]            | 0.76 | 1.99  | 0.48 | 0.00 | 1 | 1 | 2      | LFPHC[330]GR                                                   | 1      |
| VAPA_HUMAN (Q9P0L0) Vesicle-associated membrane protein-associated protein A (VAMP-associated protein A) (VAMP-A) (VAP-A) (33 kDa Vamp-associated protein) (VAP-33) [MASS=27317]                                                             | 0.00 | 12.40 | 0.99 | 0.00 | 1 | 2 | 2<br>2 | FM[147]VQTIFAPPNTSDMEAVWKEAK<br>LM[147]EEC[330]KR              | 1<br>1 |
| VATA1_HUMAN (P38606) Vacuolar ATP synthase catalytic subunit A, ubiquitous isoform (EC 3.6.3.14) (V-ATPase subunit A 1) (Vacuolar proton pump alpha subunit 1) (V-ATPase 69 kDa subunit 1) (Isoform VA68) [MASS=68304]                       | 0.00 | 3.89  | 3.07 | 0.00 | 1 | 2 | 2<br>3 | C[339]LGNPER<br>LAEMPADSGYPAYLGAR                              | 1<br>1 |
| VATB1_HUMAN (P15313) Vacuolar ATP synthase subunit B, kidney isoform (EC 3.6.3.14) (V-ATPase B1 subunit) (Vacuolar proton pump B isoform 1) (Endomembrane proton pump 58 kDa subunit) [MASS=56980]                                           | *    | 2.92  | *    | *    | * | 1 | 3      | PGGLPGSSC[339]NLGAAR                                           | 4      |
| VATB2_HUMAN (P21281) Vacuolar ATP synthase subunit B, brain isoform (EC 3.6.3.14) (V-ATPase B2 subunit) (Vacuolar proton pump B isoform 2) (Endomembrane proton pump 58 kDa subunit) (HO57) [MASS=56500]                                     | 0.99 | 7.83  | 0.64 | 0.00 | 1 | 2 | 3<br>2 | GPVVLAEDFLDIM[147]GQPINPQC[330]R<br>KDHADVSNQLYAC[330]YAIGK    | 1<br>1 |
| VATH_HUMAN (Q9UI12) Vacuolar ATP synthase subunit H (EC 3.6.3.14) (V-ATPase H subunit) (Vacuolar proton pump H subunit) (V-ATPase 50/57 kDa subunits) (Vacuolar proton pump subunit SFD) (VMA13) (Nef-binding protein 1) (NBP1) [MASS=55883] | 0.00 | 7.87  | 0.58 | 0.00 | 1 | 2 | 3<br>2 | C[330]GFQLQYQM[147]IFSIWLLAFSPQMC[330]EHLR<br>QEYALAMIQC[330]K | 1<br>1 |
| VAV2_HUMAN (P52735) Protein vav-2 [MASS=101256]                                                                                                                                                                                              | *    | 1.25  | *    | *    | * | 1 | 2      | KSGYFPSSSVK                                                    | 1      |



|                                                                                                                                                                                                       |      |       |      |      |   |   |   |                                          |   |
|-------------------------------------------------------------------------------------------------------------------------------------------------------------------------------------------------------|------|-------|------|------|---|---|---|------------------------------------------|---|
| VCAM1_HUMAN (P19320) Vascular cell adhesion protein 1 precursor (V-CAM 1) (CD106 antigen) (INCAM-100) [MASS=81276]                                                                                    | *    | 4.33  | *    | *    | * | 2 | 2 | GIQVEIYSFPK                              | 1 |
|                                                                                                                                                                                                       |      |       |      |      |   |   | 3 | DPEIEMSGGLVNGSSVTVSC[330]K               | 1 |
| VDAC1_HUMAN (P21796) Voltage-dependent anion-selective channel protein 1 (VDAC-1) (hVDAC1) (Outer mitochondrial membrane protein porin 1) (Plasmalemmal porin) (Porin 31HL) (Porin 31HM) [MASS=30641] | 1.00 | 4.26  | 1.22 | 0.05 | 4 | 1 | 2 | YQIDPDAC[339]FSAK                        | 2 |
|                                                                                                                                                                                                       |      |       |      |      |   |   | 2 | YQIDPDAC[330]FSAK                        | 2 |
| VDAC2_HUMAN (P45880) Voltage-dependent anion-selective channel protein 2 (VDAC-2) (hVDAC2) (Outer mitochondrial membrane protein porin 2) [MASS=38092]                                                | 1.00 | 11.82 | 1.18 | 0.05 | 2 | 2 | 2 | SC[339]SGVEFSTSGSNTDTGK                  | 1 |
|                                                                                                                                                                                                       |      |       |      |      |   |   | 3 | WNTDNTLGTETIAIEDQIC[339]QGLK             | 1 |
| VDAC3_HUMAN (Q9Y277) Voltage-dependent anion-selective channel protein 3 (VDAC-3) (hVDAC3) (Outer mitochondrial membrane protein porin 3) [MASS=30658]                                                | 1.00 | 3.89  | 1.30 | 0.05 | 3 | 1 | 2 | VC[339]NYGLTFTQK                         | 2 |
|                                                                                                                                                                                                       |      |       |      |      |   |   | 2 | VC[330]NYGLTFTQK                         | 1 |
| VDP_HUMAN (O60763) General vesicular transport factor p115 (Transcytosis-associated protein) (TAP) (Vesicle docking protein) [MASS=107907]                                                            | 0.00 | 1.46  | 1.18 | 0.00 | 1 | 1 | 2 | LC[330]DRVASSTLLDDR                      | 1 |
| VGFR3_HUMAN (P35916) Vascular endothelial growth factor receptor 3 precursor (EC 2.7.10.1) (VEGFR-3) (Tyrosine-protein kinase receptor FLT4) [MASS=145598]                                            | *    | 6.09  | *    | *    | * | 4 | 3 | DAFSPC[330]AEKSPEQR                      | 1 |
|                                                                                                                                                                                                       |      |       |      |      |   |   | 3 | GSMEIVILVGTGVIAFFWVLLLLLIFC[330]NM[147]R | 1 |
|                                                                                                                                                                                                       |      |       |      |      |   |   | 3 | NILLSSESDVVKIC[339]DFGLARDIYK            | 1 |
|                                                                                                                                                                                                       |      |       |      |      |   |   | 2 | DC[339]EGTDARPYC[330]K                   | 1 |
| VISL1_HUMAN (P62760) Visinin-like protein 1 (VILIP) (Hippocalcin-like protein 3) (HLP3) [MASS=22011]                                                                                                  | 1.00 | 18.95 | 0.74 | 0.12 | 3 | 3 | 2 | SDPSIVLLLQC[330]DIQK                     | 1 |
|                                                                                                                                                                                                       |      |       |      |      |   |   | 2 | GFLKDC[330]PSGR                          | 1 |
|                                                                                                                                                                                                       |      |       |      |      |   |   | 2 | EFIC[339]ALSITSR                         | 1 |
| VP13B_HUMAN (Q7Z7G8) Vacuolar protein sorting 13B (Cohen syndrome protein 1) [MASS=448732]                                                                                                            | 0.00 | 2.66  | 0.96 | 0.00 | 1 | 5 | 3 | SWYHGQTSM[147]PGTLVLC[330]LPQIKIISAGHK   | 1 |
|                                                                                                                                                                                                       |      |       |      |      |   |   | 3 | C[330]PEVEELVFSHFVIC[339]NDTQETLR        | 1 |
|                                                                                                                                                                                                       |      |       |      |      |   |   | 2 | LPSYILENNELTELC[330]VK                   | 1 |
|                                                                                                                                                                                                       |      |       |      |      |   |   | 2 | PYVRTLLIELLPWALLINESK                    | 1 |
|                                                                                                                                                                                                       |      |       |      |      |   |   | 2 | LGSEPVVITINTMEC[339]ILK                  | 1 |

|                                                                                                                                                                                                                                                                             |      |       |      |      |   |   |   |                                                  |   |
|-----------------------------------------------------------------------------------------------------------------------------------------------------------------------------------------------------------------------------------------------------------------------------|------|-------|------|------|---|---|---|--------------------------------------------------|---|
| VPP1_HUMAN (Q93050) Vacuolar proton translocating ATPase 116 kDa subunit a isoform 1 (V-ATPase 116 kDa isoform a1) (Clathrin-coated vesicle/synaptic vesicle proton pump 116 kDa subunit) (Vacuolar proton pump subunit 1) (Vacuolar adenosine triphosphatase [MASS=96412]) | 0.94 | 0.84  | 0.53 | 0.00 | 1 | 1 | 2 | KIC[330]EGFR                                     | 1 |
| VPS28_HUMAN (Q9UK41) VPS28 protein homolog [MASS=25425]                                                                                                                                                                                                                     | 0.00 | 6.79  | 1.46 | 0.00 | 1 | 1 | 2 | QVQGSEISSIDEFC[339]R                             | 1 |
| VPS29_HUMAN (Q9UBQ0) Vacuolar protein sorting 29 (Vesicle protein sorting 29) (hVPS29) (PEP11) [MASS=20506]                                                                                                                                                                 | 0.99 | 7.14  | 0.51 | 0.00 | 1 | 1 | 2 | IQHILC[330]TGNLIC[330]TK                         | 1 |
| VPS35_HUMAN (Q96QK1) Vacuolar protein sorting 35 (Vesicle protein sorting 35) (hVPS35) (Maternal-embryonic 3) [MASS=91706]                                                                                                                                                  | *    | 4.77  | *    | *    | * | 2 | 3 | C[339]QKIFSFAHQTSALIKAELAEPLR                    | 1 |
|                                                                                                                                                                                                                                                                             |      |       |      |      |   |   | 2 | KDILKDLVEM[147]C[339]R                           | 1 |
| VPS4A_HUMAN (Q9UN37) Vacuolar sorting protein 4a (SKD2 protein) (hVPS4) (VPS4-1) [MASS=48898]                                                                                                                                                                               | *    | 2.97  | *    | *    | * | 1 | 2 | ESIRAKC[330]VQYLDR                               | 1 |
| VPS54_HUMAN (Q9P1Q0) Vacuolar protein sorting protein 54 (Tumor antigen SLP-8p) (Hepatocellular carcinoma protein 8) [MASS=110588]                                                                                                                                          | 0.00 | 2.25  | 1.79 | 0.00 | 1 | 1 | 3 | IILEYC[339]QC[339]VDNIPSVTTDM[147]LTR            | 1 |
| VWF_HUMAN (P04275) Von Willebrand factor precursor (vWF) [Contains: Von Willebrand antigen II] [MASS=309298]                                                                                                                                                                | *    | 3.20  | *    | *    | * | 4 | 3 | RVTILVEGGEIELFDGEVNVK                            | 1 |
|                                                                                                                                                                                                                                                                             |      |       |      |      |   |   | 2 | VPLDSSPATC[339]HNNIM[147]K                       | 1 |
|                                                                                                                                                                                                                                                                             |      |       |      |      |   |   | 3 | VEDFGNAWKLHGDC[339]QDLQKQHS DPC[330]ALNPR        | 1 |
|                                                                                                                                                                                                                                                                             |      |       |      |      |   |   | 3 | IM[147]KIPGTC[330]C[339]DTC[330]EEPEC[330]NDITAR | 1 |
| WBS22_HUMAN (O43709) Putative methyltransferase WBSCR22 (EC 2.1.1.-) (Williams-Beuren syndrome chromosome region 22 protein) [MASS=31880]                                                                                                                                   | 0.00 | 4.98  | 1.34 | 0.00 | 1 | 1 | 3 | LYC[339]FFASLFSVLVR                              | 1 |
| WDFY3_HUMAN (Q8IZQ1) WD repeat and FYVE domain-containing protein 3 (Autophagy-linked FYVE protein) (Alfy) [MASS=395256]                                                                                                                                                    | *    | 2.07  | *    | *    | * | 5 | 3 | LGDVILPPWAK                                      | 1 |
|                                                                                                                                                                                                                                                                             |      |       |      |      |   |   | 2 | VFSWSVSDQPGRSAADHWVK                             | 1 |
|                                                                                                                                                                                                                                                                             |      |       |      |      |   |   | 3 | VKC[339]LVSM[147]TTPHDIR                         | 1 |
|                                                                                                                                                                                                                                                                             |      |       |      |      |   |   | 2 | EHFYVIDGFTMTATR                                  | 1 |
|                                                                                                                                                                                                                                                                             |      |       |      |      |   |   | 3 | NYLLAFQKGIRNK                                    | 1 |
| WDR13_HUMAN (Q9H1Z4) WD repeat protein 13 [MASS=53715]                                                                                                                                                                                                                      | *    | 3.09  | *    | *    | * | 1 | 3 | EARDPSLLINAC[330]LNK                             | 1 |
| WDR20_HUMAN (Q8TBZ3) WD repeat protein 20 (DMR protein) [MASS=62933]                                                                                                                                                                                                        | *    | 14.94 | *    | *    | * | 3 | 3 | VPFNSQGSNPVRVSVFNLNLDQSGNGDRLC[339]FNVGR         | 1 |
|                                                                                                                                                                                                                                                                             |      |       |      |      |   |   | 3 | TDPAKTLGTPLC[339]PRMEDVPLLEPLIC[330]K            | 1 |
|                                                                                                                                                                                                                                                                             |      |       |      |      |   |   | 3 | LLPHSEYSRPNRVPFNSQGSNPVR                         | 1 |

|                                                                                                                                                                         |      |       |      |      |   |   |   |                                         |   |
|-------------------------------------------------------------------------------------------------------------------------------------------------------------------------|------|-------|------|------|---|---|---|-----------------------------------------|---|
| WDR22_HUMAN (Q96JK2) WD repeat protein 22 (Breakpoint cluster region protein 2) (BCRP2) [MASS=103963]                                                                   | 0.00 | 5.63  | 1.48 | 0.22 | 2 | 3 | 3 | EAC[330]LNIAMAQRNQDLPEEGC[339]SK        | 2 |
|                                                                                                                                                                         |      |       |      |      |   |   | 2 | EAC[339]LNIAM[147]AQRNQDLPEEGC[330]SK   | 1 |
|                                                                                                                                                                         |      |       |      |      |   |   | 2 | SLETIC[339]ANHNNGR                      | 1 |
|                                                                                                                                                                         |      |       |      |      |   |   | 3 | LPVFQFDNQGYFNCS[330]TM[147]K            | 1 |
|                                                                                                                                                                         |      |       |      |      |   |   | 3 | PEC[339]RHHLATC[339]SMM[147]VDHNIYVWDVR | 1 |
| WDR24_HUMAN (Q96S15) WD repeat protein 24 [MASS=101989]                                                                                                                 | 0.00 | 7.93  | 1.56 | 0.00 | 1 | 4 | 2 | VTTALGGSVLTGR                           | 1 |
|                                                                                                                                                                         |      |       |      |      |   |   | 3 | GGSC[330]GLPLMNSFNLK                    | 1 |
|                                                                                                                                                                         |      |       |      |      |   |   | 2 | LHHSFAHGPM[147]QDAESTANDAR              | 1 |
|                                                                                                                                                                         |      |       |      |      |   |   | 3 | GLVVSQKDSQQPIK                          | 2 |
| WDR33_HUMAN (Q9C0J8) WD repeat protein 33 (WD repeat protein WDC146) [MASS=145920]                                                                                      | *    | 1.87  | *    | *    | * | 2 | 1 | GRGGPGAQR                               | 1 |
| WDR43_HUMAN (Q15061) WD repeat protein 43 [MASS=79118]                                                                                                                  | *    | 5.83  | *    | *    | * | 2 | 3 | EDLQTNSEFPVLLTQGLSENFEMLNKVLQTR         | 1 |
|                                                                                                                                                                         |      |       |      |      |   |   | 3 | EEPVKLAVVC[339]R                        | 1 |
| WDR65_HUMAN (Q96MR6) WD repeat protein 65 [MASS=78164]                                                                                                                  | *    | 1.29  | *    | *    | * | 1 | 2 | EIADSLILR                               | 1 |
| WDR6_HUMAN (Q9NNW5) WD repeat protein 6 [MASS=121724]                                                                                                                   | *    | 0.80  | *    | *    | * | 1 | 2 | GMNWLGLR                                | 1 |
| WDR72_HUMAN (Q3MJ13) WD repeat protein 72 [MASS=123408]                                                                                                                 | *    | 5.26  | *    | *    | * | 2 | 3 | QPYIVSAAENGEMC[330]VWNVTNGQC[339]VEK    | 1 |
|                                                                                                                                                                         |      |       |      |      |   |   | 3 | NLPLQTPVSPVKHDSNSNSANFQDVEDMPDR         | 1 |
| WDR76_HUMAN (Q9H967) WD repeat protein 76 [MASS=69753]                                                                                                                  | 0.00 | 3.51  | 2.06 | 0.00 | 1 | 1 | 2 | VHSFGGEYLVSV[339]SINAMHPTR              | 1 |
| WIPI2_HUMAN (Q9Y4P8) WD repeat domain phosphoinositide-interacting protein 2 (WIPI-2) (WIPI49-like protein 2) [MASS=49408]                                              | 0.97 | 12.11 | 0.56 | 0.00 | 1 | 2 | 3 | AANMIPAHDSPLAALAFDASGTK                 | 1 |
|                                                                                                                                                                         |      |       |      |      |   |   | 3 | LDGSLETTNEILDSASHDC[330]PLVTQTYGAAAGK   | 1 |
| WNT9B_HUMAN (O14905) Protein Wnt-9b precursor (Wnt-15) (Wnt-14b) [MASS=38971]                                                                                           | *    | 3.92  | *    | *    | * | 1 | 3 | LELWAPARQGSCLK                          | 1 |
| XAB2_HUMAN (Q9HCS7) XPA-binding protein 2 (HCNP protein) [MASS=100009]                                                                                                  | *    | 5.50  | *    | *    | * | 2 | 2 | IATPQIVINYAM[147]FLEEKHYFEESFKAYER      | 2 |
|                                                                                                                                                                         |      |       |      |      |   |   | 3 | FEQLISRRPLLLNSVLLR                      | 1 |
| XCL1_HUMAN (P47992) Lymphotoxin precursor (XCL1) (Cytokine SCM-1) (ATAC) (Lymphotoxin) (SCM-1-alpha) (Small inducible cytokine C1) (XC chemokine ligand 1) [MASS=12517] | 0.00 | 9.65  | 1.62 | 0.00 | 1 | 1 | 2 | VC[339]ADPQATWVR                        | 1 |
| XPO5_HUMAN (Q9HAV4) Exportin-5 (Exp5) (Ran-binding protein 21) [MASS=136310]                                                                                            | *    | 1.99  | *    | *    | * | 1 | 2 | KTKPMLETEVLDNDGGGLATIFEP                | 1 |

|                                                                                                                                                                                                                                                                              |      |       |      |      |   |   |   |                                              |   |
|------------------------------------------------------------------------------------------------------------------------------------------------------------------------------------------------------------------------------------------------------------------------------|------|-------|------|------|---|---|---|----------------------------------------------|---|
| XPP2_HUMAN (O43895) Xaa-Pro aminopeptidase 2 precursor (EC 3.4.11.9) (X-Pro aminopeptidase 2) (Membrane-bound aminopeptidase P) (Membrane-bound APP) (Membrane-bound AmP) (mAmP) (Aminoacylproline aminopeptidase) [MASS=75624]                                              | 0.38 | 3.56  | 0.20 | 0.00 | 1 | 1 | 2 | NC[330]STNPPYLPVTVVNTTM[147]SLTALR           | 1 |
| YES_HUMAN (P07947) Proto-oncogene tyrosine-protein kinase Yes (EC 2.7.10.2) (p61-Yes) (c-Yes) [MASS=60670]                                                                                                                                                                   | 0.00 | 14.21 | 4.11 | 0.00 | 1 | 4 | 3 | MPC[339]PQGC[339]PESLHELM[147]NLC[339]WK     | 1 |
|                                                                                                                                                                                                                                                                              |      |       |      |      |   |   | 2 | PGTMM[147]PEAFLQEAQIMKK                      | 1 |
|                                                                                                                                                                                                                                                                              |      |       |      |      |   |   | 3 | LVKHYTEHADGLC[339]HK                         | 1 |
|                                                                                                                                                                                                                                                                              |      |       |      |      |   |   | 3 | GYRMPC[330]PQGC[330]PESLHELM[147]NLC[339]WKK | 1 |
| YJDC_HUMAN (Q96F86) YjeF domain-containing protein 1 (Edc3) [MASS=56077]                                                                                                                                                                                                     | *    | 1.77  | *    | *    | * | 1 | 2 | HMESLSQSK                                    | 1 |
| YYAP1_HUMAN (Q9H869) YY1-associated protein 1 (Hepatocellular carcinoma susceptibility protein) (Hepatocellular carcinoma-associated protein 2) [MASS=87915]                                                                                                                 | *    | 2.89  | *    | *    | * | 1 | 3 | SLAATPSSSLPC[339]TLIALGLRHEK                 | 1 |
|                                                                                                                                                                                                                                                                              |      |       |      |      |   |   | 2 | PTIPTKPTIPTKSTISPEK                          | 1 |
|                                                                                                                                                                                                                                                                              |      |       |      |      |   |   | 2 | VALPVWLAQGRVTIR                              | 1 |
| ZAN_HUMAN (Q9Y493) Zonadhesin precursor [MASS=305571]                                                                                                                                                                                                                        | *    | 3.34  | *    | *    | * | 6 | 3 | PSIPTKPSIPTEK                                | 1 |
|                                                                                                                                                                                                                                                                              |      |       |      |      |   |   | 1 | STISPEK                                      | 2 |
|                                                                                                                                                                                                                                                                              |      |       |      |      |   |   | 3 | AVLLSPVSLSSGC[339]LSFSFHYILR                 | 1 |
|                                                                                                                                                                                                                                                                              |      |       |      |      |   |   | 3 | PTISTEKPTIPSEK                               | 1 |
| ZBT11_HUMAN (O95625) Zinc finger and BTB domain-containing protein 11 [MASS=119382]                                                                                                                                                                                          | *    | 2.28  | *    | *    | * | 1 | 3 | DAPSSSSSNSTSNEASGTSSEKGR                     | 1 |
| ZBT40_HUMAN (Q9NUA8) Zinc finger and BTB domain-containing protein 40 [MASS=138118]                                                                                                                                                                                          | 0.21 | 2.42  | 0.98 | 0.00 | 1 | 2 | 3 | QANGLSIHLHTFHNIEDPYDC[339]KK                 | 1 |
|                                                                                                                                                                                                                                                                              |      |       |      |      |   |   | 2 | AEHADM[147]K                                 | 1 |
| ZBT7A_HUMAN (O95365) Zinc finger and BTB domain-containing protein 7A (Leukemia/lymphoma-related factor) (Factor that binds to inducer of short transcripts protein 1) (Factor binding IST protein 1) (FBI-1) (HIV-1 1st-binding protein 1) (TTF-I-interacting) [MASS=61439] | 0.00 | 1.71  | 0.46 | 0.00 | 1 | 1 | 2 | KDGC[330]NGVPSR                              | 1 |

|                                                                                                                                                                                     |      |       |       |      |   |   |             |                                                                                             |             |
|-------------------------------------------------------------------------------------------------------------------------------------------------------------------------------------|------|-------|-------|------|---|---|-------------|---------------------------------------------------------------------------------------------|-------------|
| ZCH11_HUMAN (Q5TAX3) Zinc finger CCHC domain-containing protein 11 [MASS=185132]                                                                                                    | *    | 3.47  | *     | *    | * | 3 | 2<br>3<br>3 | EIIENLAKILKR<br>LC[339]LFGSSKNGFGFRDSDLIC[330]MTLEGHENA<br>M[147]DDFQLKGIVEEK               | 1<br>1<br>1 |
| ZCHC6_HUMAN (Q5VYS8) Zinc finger CCHC domain-containing protein 6 [MASS=171228]                                                                                                     | *    | 2.74  | *     | *    | * | 3 | 3<br>2<br>2 | KITPGNYGNTPR<br>IMENVFQHK<br>YLC[330]YTM[147]KVFTKM[147]C[339]DIGDASR                       | 1<br>1<br>1 |
| ZCHC9_HUMAN (Q8N567) Zinc finger CCHC domain-containing protein 9 [MASS=30451]                                                                                                      | 0.00 | 17.71 | 0.84  | 0.00 | 1 | 3 | 2<br>2<br>3 | ALPATSWEDM[147]KK<br>KNAM[147]VC[330]FHC[330]R<br>SC[330]PDNPKGLYADGGGC[330]KLC[330]GSVEHLK | 1<br>1<br>1 |
| ZFH2_HUMAN (Q9C0A1) Zinc finger homeobox protein 2 [MASS=152100]                                                                                                                    | *    | 2.03  | *     | *    | * | 1 | 3           | PPM[147]AKEGNEAGPSSPPDPLPNEAARTAAK                                                          | 1           |
| ZHX2_HUMAN (Q9Y6X8) Zinc fingers and homeoboxes protein 2 (Zinc finger and homeodomain protein 2) (Alpha-fetoprotein regulator 1) (AFP regulator 1) (Regulator of AFP) [MASS=92306] | 0.29 | 4.78  | 0.76  | 0.00 | 1 | 2 | 2<br>2      | DC[330]LPAKPSEATSDR<br>TGTVKWM[147]EQYQHQPMP[147]ADDHGYDAVAR                                | 1<br>1      |
| ZMYM3_HUMAN (Q14202) Zinc finger MYM-type protein 3 (Zinc finger protein 261) (DXS6673E protein) [MASS=152378]                                                                      | *    | 1.31  | *     | *    | * | 1 | 3           | SFC[330]SEGC[339]VLLYKQDFTKK                                                                | 1           |
| ZN133_HUMAN (P52736) Zinc finger protein 133 [MASS=73402]                                                                                                                           | *    | 3.21  | *     | *    | * | 2 | 2<br>3      | SLARHQK<br>PC[339]VC[339]REC[339]GQGFLQK                                                    | 1<br>1      |
| ZN217_HUMAN (O75362) Zinc finger protein 217 [MASS=115271]                                                                                                                          | *    | 4.87  | *     | *    | * | 2 | 3<br>3      | VTGNMPTQSLLMYMDGPEVIGSSLGSPMEMEDALSMK<br>RAGAESPTM[147]SVDGR                                | 1<br>1      |
| ZN256_HUMAN (Q9Y2P7) Zinc finger protein 256 (Bone marrow zinc finger 3) (BMZF-3) [MASS=54872]                                                                                      | *    | 5.06  | *     | *    | * | 1 | 3           | ERSYM[147]C[330]SEC[330]GKSFSTSC[339]SLSDHLR                                                | 1           |
| ZN294_HUMAN (O94822) Zinc finger protein 294 [MASS=200534]                                                                                                                          | 0.00 | 2.21  | 0.34  | 0.00 | 1 | 3 | 3<br>2<br>2 | M[147]VLIARLKETVLENNELEK<br>LIGWLNEDQRK<br>QPEAIAFC[330]K                                   | 1<br>1<br>1 |
| ZN407_HUMAN (Q9C0G0) Zinc finger protein 407 (Fragment) [MASS=126979]                                                                                                               | 0.00 | 4.29  | 10.47 | 0.00 | 1 | 2 | 3<br>3      | VHC[339]EGEGGNAGDGGGVVPHR<br>GQGATFVETDSPFTAALAEPLVKEKPLR                                   | 1<br>1      |
| ZN441_HUMAN (Q8N8Z8) Zinc finger protein 441 [MASS=72193]                                                                                                                           | *    | 2.40  | *     | *    | * | 1 | 2           | C[330]KVC[339]GKAFDSPSLC[330]R                                                              | 1           |
| ZN473_HUMAN (Q8WTR7) Zinc finger protein 473 (Zinc finger protein 100 homolog) (Zfp-100) [MASS=100182]                                                                              | 0.00 | 3.44  | 0.69  | 0.00 | 1 | 2 | 2<br>2      | VHTGEKPYRC[330]GEC[339]GK<br>IHTGEKPYSC[330]NVC[330]GK                                      | 1<br>1      |
| ZN479_HUMAN (Q96JC4) Zinc finger protein 479 (Zinc finger protein Kr19) (HKr19) [MASS=60598]                                                                                        | 0.33 | 6.49  | 0.94  | 0.00 | 1 | 3 | 1<br>2<br>3 | WHSSLAK<br>RSSALTIHK<br>C[330]EEC[330]GKVFSLSSTLTDHK                                        | 1<br>1<br>1 |
| ZN483_HUMAN (Q8TF39) Zinc finger protein 483 [MASS=85097]                                                                                                                           | 0.00 | 4.03  | *     | *    | * | 2 | 3<br>1      | PYM[147]C[339]NEC[339]GKAFDSSSLTPHHR<br>LDESALDK                                            | 1<br>1      |

|                                                                                                                                                                                                      |      |       |      |      |   |   |                                                                                                     |                  |
|------------------------------------------------------------------------------------------------------------------------------------------------------------------------------------------------------|------|-------|------|------|---|---|-----------------------------------------------------------------------------------------------------|------------------|
| ZN485_HUMAN (Q8NCK3) Zinc finger protein 485 [MASS=50280]                                                                                                                                            | 0.00 | 13.61 | 0.59 | 0.00 | 1 | 4 | 2 C[330]KEC[339]GIAFMNSSLLNHHK<br>2 SSTLTGHQRIHTGEKPYHC[330]K<br>2 NHTSEKPHKC[330]K<br>3 YNSSFISHQR | 1<br>1<br>1<br>1 |
| ZN511_HUMAN (Q8NB15) Zinc finger protein 511 [MASS=29428]                                                                                                                                            | *    | 8.02  | *    | *    | * | 2 | 2 QDM[147]YQC[330]LVEGC[330]TEKFK<br>1 TSRDR                                                        | 1<br>1           |
| ZN560_HUMAN (Q96MR9) Zinc finger protein 560 [MASS=91120]                                                                                                                                            | 0.00 | 2.03  | 1.03 | 0.00 | 1 | 1 | 2 C[330]GKPFTSSAC[330]LRIHMR                                                                        | 1                |
| ZN561_HUMAN (Q8N587) Zinc finger protein 561 [MASS=55197]                                                                                                                                            | *    | 3.91  | *    | *    | * | 1 | 3 AFTTSTSLIQHTRIHTGEK                                                                               | 1                |
| ZN563_HUMAN (Q8TA94) Zinc finger protein 563 [MASS=55434]                                                                                                                                            | *    | 4.83  | *    | *    | * | 2 | 2 HM[147]IM[147]HTGGGPHKC[339]K<br>2 GFDRPSLVR                                                      | 1<br>1           |
| ZN571_HUMAN (Q7Z3V5) Zinc finger protein 571 [MASS=70801]                                                                                                                                            | 0.00 | 4.93  | 1.17 | 0.00 | 1 | 2 | 2 INHHLQYNGLDNM[147]EC[330]K<br>3 DFRC[330]PSQLTQHTR<br>3 IFGQNSALVIHK<br>3 VFSC[339]GSTLETHK       | 1<br>1<br>1<br>3 |
| ZN600_HUMAN (Q6ZNG1) Zinc finger protein 600 [MASS=83157]                                                                                                                                            | *    | 6.37  | *    | *    | * | 3 | 3 VFSC[330]GSTLETHK<br>3 PQIHISNNYGNNSPNSLLPQK                                                      | 1<br>1           |
| ZN625_HUMAN (Q96I27) Zinc finger protein 625 [MASS=34746]                                                                                                                                            | 0.00 | 4.90  | 0.85 | 0.00 | 1 | 1 | 2 THGRTHHTGEKPYEC[330]K                                                                             | 1                |
| ZN638_HUMAN (Q14966) Zinc finger protein 638 (Nuclear protein 220) (Zinc-finger matrix-like protein) (Cutaneous T-cell lymphoma-associated antigen se33-1) (CTCL tumor antigen se33-1) [MASS=220623] | *    | 2.83  | *    | *    | * | 4 | 2 TVDKKNISEK<br>1 QKHLEAADK<br>3 AYIEINRKAESMVK<br>3 TKLESLSQVGPVNVENVMEEDLK                        | 1<br>1<br>1<br>1 |
| ZN639_HUMAN (Q9UID6) Zinc finger protein 639 (Zinc finger protein ZASC1) (Zinc finger protein ANC_2H01) [MASS=56054]                                                                                 | 0.00 | 8.04  | 1.19 | 0.00 | 1 | 2 | 2 GFSSM[147]LEYC[339]K<br>3 YSDSSGISRIADGFNGIFSDHC[330]YSVC[339]SM[147]R                            | 1<br>1           |
| ZN655_HUMAN (Q8N720) Zinc finger protein 655 (Vav-interacting Krueppel-like protein) [MASS=57393]                                                                                                    | 0.00 | 2.44  | 1.27 | 0.00 | 1 | 1 | 2 SC[339]SPSSGIIQHK                                                                                 | 1                |
| ZN708_HUMAN (P17019) Zinc finger protein 708 (Zinc finger protein 15-like 1) (Zinc finger protein KOX8) [MASS=64779]                                                                                 | 0.00 | 4.80  | 0.30 | 0.00 | 1 | 2 | 3 GC[330]KSVDEHK<br>2 SSHLTNHKVIHTGEKPYK                                                            | 1<br>1           |
| ZNF13_HUMAN (P17016) Zinc finger protein 13 (Zinc finger protein KOX5) (Fragment) [MASS=6274]                                                                                                        | 0.00 | 33.93 | 1.71 | 0.00 | 1 | 1 | 2 C[339]EEC[339]GKGFSRASLLAHQR                                                                      | 1                |

|                                                                                                                                  |      |      |      |      |   |   |                                                                                                        |                                  |   |
|----------------------------------------------------------------------------------------------------------------------------------|------|------|------|------|---|---|--------------------------------------------------------------------------------------------------------|----------------------------------|---|
| ZNF18_HUMAN (P17022) Zinc finger protein 18 (Zinc finger protein KOX11) (Heart development-specific gene 1 protein) [MASS=62288] | *    | 4.01 | *    | *    | * | 1 | 2                                                                                                      | QLGQHLPNPHSGEM[147]STM[147]WLEEK | 3 |
| ZNF20_HUMAN (P17024) Zinc finger protein 20 (Zinc finger protein KOX13) [MASS=61567]                                             | 0.00 | 6.58 | 1.31 | 0.00 | 1 | 2 | 2 EC[339]GNAFSFPSEIRRHK<br>2 ESHHC[339]GESFNQIADDMLNR                                                  | 1<br>1                           |   |
| ZNF30_HUMAN (P17039) Zinc finger protein 30 (Zinc finger protein KOX28) [MASS=62123]                                             | 0.00 | 7.20 | 0.92 | 0.00 | 1 | 3 | 2 EC[330]GKAFSTSSPLVKHQR<br>2 ASYLVQHGR<br>2 AFISGSFAVVRHGR                                            | 1<br>1<br>1                      |   |
| ZNF85_HUMAN (Q03923) Zinc finger protein 85 (Zinc finger protein HPF4) (HTF1) [MASS=68718]                                       | 0.00 | 2.86 | 0.56 | 0.00 | 1 | 1 | 2 HEIM[147]VAKPTVM[147]C[330]SHFAR                                                                     | 1                                |   |
| ZNF92_HUMAN (Q03936) Zinc finger protein 92 (Zinc finger protein HTF12) [MASS=68486]                                             | *    | 3.24 | *    | *    | * | 1 | 2 QSSTLTEHKIIHTGEKPYK                                                                                  | 1                                |   |
| ZNFX1_HUMAN (Q9P2E3) NFX1-type zinc finger-containing protein 1 [MASS=220225]                                                    | *    | 2.76 | *    | *    | * | 3 | 2 GM[147]YC[339]IGNMQM[147]LAKVPLWSK<br>2 C[330]RNGHIYVIGDC[330]GGAM[147]ER<br>3 TM[147]PIYPTYNEVHLDER | 1<br>1<br>1                      |   |
| ZNT1_HUMAN (Q9Y6M5) Zinc transporter 1 (ZnT-1) (Solute carrier family 30 member 1) [MASS=55328]                                  | *    | 6.31 | *    | *    | * | 1 | 3 VTSSLAM[147]LSDSFHMLSDVLALVVALVAERFAR                                                                | 1                                |   |
| ZNT3_HUMAN (Q99726) Zinc transporter 3 (ZnT-3) (Solute carrier family 30 member 3) [MASS=41944]                                  | 0.00 | 6.96 | 1.38 | 0.00 | 1 | 1 | 3 AADPISTFLFSIC[330]ALGSTAPTLRDVLR                                                                     | 1                                |   |
| ZSCA4_HUMAN (Q8NAM6) Zinc finger and SCAN domain-containing protein 4 (Zinc finger protein 494) [MASS=48956]                     | 0.00 | 5.54 | 0.56 | 0.00 | 1 | 1 | 3 HSKDEIISLLVLEQFM[147]IGGHC[330]NDK                                                                   | 1                                |   |
| ZSWM2_HUMAN (Q8NEG5) Zinc finger SWIM domain-containing protein 2 [MASS=72720]                                                   | *    | 3.63 | *    | *    | * | 1 | 3 C[330]M[147]KILANYQSTSNTSMLKC[339]PLC[339]R                                                          | 1                                |   |

## Table 5. MCI mitochondrial samples

### Experiment 3

| Description                                                                                                                                                                                                                                   | A = Protein Score |       |      |      | E = XPress Peptides |   |   |                                        | Peptide Sequence | H |
|-----------------------------------------------------------------------------------------------------------------------------------------------------------------------------------------------------------------------------------------------|-------------------|-------|------|------|---------------------|---|---|----------------------------------------|------------------|---|
|                                                                                                                                                                                                                                               | A                 | B     | C    | D    | E                   | F | G |                                        |                  |   |
| 1433B_HUMAN (P31946) 14-3-3 protein beta/alpha (Protein kinase C inhibitor protein 1) (KCIP-1) (Protein 1054) [MASS=27951]                                                                                                                    | 0.32              | 11.02 | 0.29 | 0.00 | 1                   | 2 | 2 | IEAELQDIC[330]NDVLELLDK                | 1                |   |
|                                                                                                                                                                                                                                               |                   |       |      |      |                     |   | 2 | YDDMAAAMK                              | 1                |   |
|                                                                                                                                                                                                                                               |                   |       |      |      |                     |   | 3 | ELETVC[339]NDVLSLLDKFLIK               | 2                |   |
| 1433F_HUMAN (Q04917) 14-3-3 protein eta (Protein AS1) [MASS=28087]                                                                                                                                                                            | 1.00              | 7.76  | 0.91 | 0.01 | 5                   | 1 | 2 | ELETVC[339]NDVLSLLDKFLIK               | 1                |   |
|                                                                                                                                                                                                                                               |                   |       |      |      |                     |   | 3 | ELETVC[330]NDVLSLLDKFLIK               | 1                |   |
|                                                                                                                                                                                                                                               |                   |       |      |      |                     |   | 2 | ELETVC[330]NDVLSLLDKFLIK               | 1                |   |
| 1433G_HUMAN (P61981) 14-3-3 protein gamma (Protein kinase C inhibitor protein 1) (KCIP-1) [MASS=28171]                                                                                                                                        | 0.95              | 7.72  | 1.24 | 0.00 | 1                   | 1 | 2 | ELEAVC[330]QDVLSLLDNYLIK               | 1                |   |
| 1433Z_HUMAN (P63104) 14-3-3 protein zeta/delta (Protein kinase C inhibitor protein 1) (KCIP-1) [MASS=27745]                                                                                                                                   | 1.00              | 21.63 | 0.69 | 0.05 | 3                   | 3 | 2 | IETELRDIC[330]NDVLSLLEK                | 1                |   |
|                                                                                                                                                                                                                                               |                   |       |      |      |                     |   | 3 | YDDM[147]AAC[339]M[147]KSVTEQGAELSNEER | 1                |   |
|                                                                                                                                                                                                                                               |                   |       |      |      |                     |   | 2 | IETELRDIC[339]NDVLSLLEK                | 1                |   |
|                                                                                                                                                                                                                                               |                   |       |      |      |                     |   | 2 | DIC[330]NDVLSLLEK                      | 1                |   |
| 2AAA_HUMAN (P30153) Serine/threonine-protein phosphatase 2A 65 kDa regulatory subunit A alpha isoform (PP2A, subunit A, PR65-alpha isoform) (PP2A, subunit A, R1-alpha isoform) (Medium tumor antigen-associated 61 kDa protein) [MASS=65092] | 1.00              | 10.71 | 1.48 | 0.17 | 3                   | 4 | 3 | DNTIEHLLPLFLAQLKDEC[330]PEVR           | 1                |   |
|                                                                                                                                                                                                                                               |                   |       |      |      |                     |   | 2 | EWAHATIIPKVLAMSGDPNYLHR                | 1                |   |
|                                                                                                                                                                                                                                               |                   |       |      |      |                     |   | 1 | QAAEDK                                 | 1                |   |
|                                                                                                                                                                                                                                               |                   |       |      |      |                     |   | 2 | NLC[339]SDDTPM[147]VR                  | 1                |   |
|                                                                                                                                                                                                                                               |                   |       |      |      |                     |   | 3 | DNTIEHLLPLFLAQLKDEC[339]PEVR           | 1                |   |
| A20A1_HUMAN (Q5TYW2) Ankyrin repeat domain-containing protein 20A1 [MASS=94047]                                                                                                                                                               | 0.00              | 3.28  | *    | *    | *                   | 1 | 3 | LLSHGAHIEALDKDNNTPLLFAIIC[330]KK       | 1                |   |
| A20A2_HUMAN (Q4UJ75) Ankyrin repeat domain-containing protein 20A2 [MASS=94148]                                                                                                                                                               | 0.00              | 5.22  | 1.21 | 0.00 | 1                   | 2 | 3 | QHRTALHLAC[330]ASGHVQVVTLLVNRK         | 1                |   |
|                                                                                                                                                                                                                                               |                   |       |      |      |                     |   | 2 | VKDENEFLTEQLSETQIK                     | 1                |   |



|                                                                                                                                                                                                                                                                             |      |       |      |      |   |   |                                                                                                                                                                |                            |   |
|-----------------------------------------------------------------------------------------------------------------------------------------------------------------------------------------------------------------------------------------------------------------------------|------|-------|------|------|---|---|----------------------------------------------------------------------------------------------------------------------------------------------------------------|----------------------------|---|
| AADAT_HUMAN (Q8N5Z0) Kynurenine/alpha-aminoadipate aminotransferase mitochondrial precursor (KAT/AadAT) (Kynurenine--oxoglutarate transaminase II) (EC 2.6.1.7) (Kynurenine aminotransferase II) (Kynurenine--oxoglutarate aminotransferase II) (2-aminoadipat [MASS=47351] | *    | 5.88  | *    | *    | * | 1 | 3                                                                                                                                                              | NTPKFLYVTPNGNNTGNSLTSERK   | 1 |
| AATC_HUMAN (P17174) Aspartate aminotransferase, cytoplasmic (EC 2.6.1.1) (Transaminase A) (Glutamate oxaloacetate transaminase 1) [MASS=46116]                                                                                                                              | 0.00 | 5.58  | 0.59 | 0.00 | 1 | 2 | 2 HIYLLPSGR<br>2 TDDC[330]HPWVLPVVKK                                                                                                                           | 1<br>1                     |   |
| AATM_HUMAN (P00505) Aspartate aminotransferase, mitochondrial precursor (EC 2.6.1.1) (Transaminase A) (Glutamate oxaloacetate transaminase 2) [MASS=47475]                                                                                                                  | 1.00 | 13.95 | 1.57 | 0.12 | 6 | 4 | 2 NLDKEYLPIGGLAEFC[339]K<br>2 NLDKEYLPIGGLAEFC[330]K<br>2 VGAFTM[147]VC[339]K<br>2 VGAFTM[147]VC[330]K<br>3 PEQVERLIKEFSIYMTK<br>2 HFIEQGINVC[339]LC[339]QSYAK | 2<br>1<br>1<br>1<br>1<br>1 |   |
| ABCA1_HUMAN (O95477) ATP-binding cassette sub-family A member 1 (ATP-binding cassette transporter 1) (ATP-binding cassette 1) (ABC-1) (Cholesterol efflux regulatory protein) [MASS=254284]                                                                                 | 0.24 | 3.76  | 4.38 | 0.00 | 1 | 3 | 3 KLSTAM[147]ALIGGPPVFLDEPTTGM[147]DPKAR<br>3 HRNM[147]LQYQLPSSLARIFSILSQSK<br>3 KGFFAQIVLPAVFVC[339]IALVFSLIVPPFGK                                            | 1<br>1<br>1                |   |
| ABCB8_HUMAN (Q9NUT2) ATP-binding cassette sub-family B member 8, mitochondrial precursor (Mitochondrial ATP-binding cassette 1) (M-ABC1) [MASS=79947]                                                                                                                       | *    | 4.22  | *    | *    | * | 1 | 3 TLDPSWLRGQVVGFIQEPVLFGTTIMENIR                                                                                                                               | 1                          |   |
| ABCG1_HUMAN (P45844) ATP-binding cassette sub-family G member 1 (White protein homolog) (ATP-binding cassette transporter 8) [MASS=75592]                                                                                                                                   | 0.00 | 3.98  | 0.88 | 0.00 | 1 | 1 | 3 M[147]AC[339]LM[147]AAFSVGTAMNASSYSAEMTEPK                                                                                                                   | 1                          |   |
| ABCG5_HUMAN (Q9H222) ATP-binding cassette sub-family G member 5 (Sterolin-1) [MASS=72503]                                                                                                                                                                                   | 0.00 | 4.30  | 0.69 | 0.00 | 1 | 1 | 3 VMLFDEPTTGLDC[330]M[147]TANQIVVLLVELAR                                                                                                                       | 1                          |   |
| ACADS_HUMAN (P16219) Short-chain specific acyl-CoA dehydrogenase, mitochondrial precursor (EC 1.3.99.2) (SCAD) (Butyryl-CoA dehydrogenase) [MASS=44297]                                                                                                                     | 0.99 | 6.07  | 2.54 | 0.00 | 1 | 1 | 3 IGIASQALGIAQTALDC[339]AVNYAENR                                                                                                                               | 1                          |   |

|                                                                                                                                                                                                                      |                                                  |       |      |      |   |   |   |                                                  |   |
|----------------------------------------------------------------------------------------------------------------------------------------------------------------------------------------------------------------------|--------------------------------------------------|-------|------|------|---|---|---|--------------------------------------------------|---|
| ACON_HUMAN (Q99798) Aconitate hydratase, mitochondrial precursor (EC 4.2.1.3) (Citrate hydro-lyase) (Aconitase) [MASS=85425]                                                                                         | 1.00                                             | 9.23  | 1.14 | 0.05 | 4 | 4 | 2 | GKC[330]TTDHISAAGPWLKFR                          | 1 |
|                                                                                                                                                                                                                      |                                                  |       |      |      |   |   | 2 | WDGKDLEDLQILIKVK                                 | 1 |
|                                                                                                                                                                                                                      |                                                  |       |      |      |   |   | 2 | VGLIGSC[339]TNSSYEDM[147]GR                      | 1 |
|                                                                                                                                                                                                                      |                                                  |       |      |      |   |   | 2 | VAVPSTIHC[330]DHLIEAQVGGEK                       | 1 |
|                                                                                                                                                                                                                      |                                                  |       |      |      |   |   | 3 | VAVPSTIHC[330]DHLIEAQVGGEK                       | 1 |
| 2                                                                                                                                                                                                                    | VGLIGSC[330]TNSSYEDM[147]GR                      | 1     |      |      |   |   |   |                                                  |   |
| ACOT9_HUMAN (Q9Y305) Acyl-coenzyme A thioesterase 9 (EC 3.1.2.-) (Acyl-CoA thioesterase 9) (Acyl-CoA thioester hydrolase 9) [MASS=46354]                                                                             | 0.51                                             | 2.46  | 1.22 | 0.00 | 1 | 1 | 2 | SLEIC[339]HPQER                                  | 1 |
| ACPM_HUMAN (O14561) Acyl carrier protein, mitochondrial precursor (ACP) (NADH-ubiquinone oxidoreductase 9.6 kDa subunit) (Cl-SDAP) [MASS=17417]                                                                      | 1.00                                             | 12.18 | 2.04 | 0.18 | 2 | 1 | 3 | LMC[330]PQEIVDYIADKKDVYE                         | 1 |
|                                                                                                                                                                                                                      |                                                  |       |      |      |   |   | 3 | LM[147]C[339]PQEIVDYIADKKDVYE                    | 1 |
| ACTB_HUMAN (P60709) Actin, cytoplasmic 1 (Beta-actin) [MASS=41736]                                                                                                                                                   | 1.00                                             | 10.93 | 0.73 | 0.10 | 6 | 3 | 2 | C[330]DVIDIRK                                    | 1 |
|                                                                                                                                                                                                                      |                                                  |       |      |      |   |   | 3 | C[330]PEALFQPSFLGM[147]ESC[330]GIHETTFNSIM[147]K | 2 |
|                                                                                                                                                                                                                      |                                                  |       |      |      |   |   | 2 | C[339]DVIDIRK                                    | 1 |
|                                                                                                                                                                                                                      |                                                  |       |      |      |   |   | 3 | C[330]PEALFQPSFLGMESC[330]GIHETTFNSIM[147]K      | 1 |
|                                                                                                                                                                                                                      |                                                  |       |      |      |   |   | 1 | C[330]DVIDIR                                     | 1 |
| 3                                                                                                                                                                                                                    | C[339]PEALFQPSFLGM[147]ESC[330]GIHETTFNSIM[147]K | 2     |      |      |   |   |   |                                                  |   |
|                                                                                                                                                                                                                      |                                                  |       |      |      |   |   | 3 | C[339]PEALFQPSFLGMESC[330]GIHETTFNSIM[147]K      | 1 |
|                                                                                                                                                                                                                      |                                                  |       |      |      |   |   | 3 | C[339]PEALFQPSFLGM[147]ESC[339]GIHETTFNSIM[147]K | 1 |
| ADA10_HUMAN (O14672) ADAM 10 precursor (EC 3.4.24.81) (A disintegrin and metalloproteinase domain 10) (Mammalian disintegrin-metalloprotease) (Kuzbanian protein homolog) (CDw156c antigen) [MASS=84142]             | *                                                | 3.21  | *    | *    | * | 1 | 2 | YIKDRTLPHFSVIYHEDDINYPHK                         | 1 |
| ADA20_HUMAN (O43506) ADAM 20 precursor (EC 3.4.24.-) (A disintegrin and metalloproteinase domain 20) [MASS=81710]                                                                                                    | 0.00                                             | 1.79  | 0.46 | 0.00 | 1 | 1 | 2 | C[330]ASMVHLSQAC[330]QR                          | 1 |
| ADA28_HUMAN (Q9UKQ2) ADAM 28 precursor (EC 3.4.24.-) (A disintegrin and metalloproteinase domain 28) (Metalloproteinase-like, disintegrin-like, and cysteine-rich protein-L) (MDC-L) (eMDC II) (ADAM23) [MASS=87208] | *                                                | 1.29  | *    | *    | * | 1 | 3 | C[330]PSTIC[330]VM[147]DK                        | 1 |

|                                                                                                                                                                      |      |      |      |      |   |   |   |                                           |   |
|----------------------------------------------------------------------------------------------------------------------------------------------------------------------|------|------|------|------|---|---|---|-------------------------------------------|---|
| ADAM2_HUMAN (Q99965) ADAM 2 precursor (A disintegrin and metalloproteinase domain 2) (Fertilin subunit beta) (PH-30) (PH30) [MASS=82457]                             | 0.00 | 2.86 | 1.16 | 0.00 | 1 | 1 | 3 | C[330]QC[330]SGAVC[330]IM[147]NPEAIHFSGVK | 1 |
| ADCY6_HUMAN (O43306) Adenylate cyclase type 6 (EC 4.6.1.1) (Adenylate cyclase type VI) (ATP pyrophosphate-lyase 6) (Ca(2+)-inhibitable adenyl cyclase) [MASS=130615] | *    | 3.51 | *    | *    | * | 2 | 3 | IGLNMGPVVAGVIGAR                          | 1 |
|                                                                                                                                                                      |      |      |      |      |   |   | 2 | IGLNMGPVVAGVIGAR                          | 1 |
|                                                                                                                                                                      |      |      |      |      |   |   | 2 | PQPAYVALLAC[339]AAALFVGLMVVC[330]NR       | 1 |
| ADCY7_HUMAN (P51828) Adenylate cyclase type 7 (EC 4.6.1.1) (Adenylate cyclase type VII) (ATP pyrophosphate-lyase 7) (Adenyl cyclase 7) [MASS=120308]                 | *    | 7.04 | *    | *    | * | 3 | 3 | NC[330]VKMGLDMC[330]QAIKQVR               | 1 |
|                                                                                                                                                                      |      |      |      |      |   |   | 3 | KEHEEFETMENVNRLLENVLPAAHFIGDK             | 1 |
|                                                                                                                                                                      |      |      |      |      |   |   | 2 | RQQENLLLSVLPAAHISM[147]GMKLAIIER          | 1 |
| ADDA_HUMAN (P35611) Alpha-adducin (Erythrocyte adducin subunit alpha) [MASS=80955]                                                                                   | 0.00 | 7.33 | 2.48 | 0.00 | 1 | 2 | 3 | C[339]GLLPISPEALSLGEVAYHDYHGILVDEEEK      | 1 |
|                                                                                                                                                                      |      |      |      |      |   |   | 3 | VSM[147]ILQSPAFC[339]EELESM[147]IQEQFK    | 1 |
| ADH1G_HUMAN (P00326) Alcohol dehydrogenase 1C (EC 1.1.1.1) (Alcohol dehydrogenase gamma subunit) [MASS=39736]                                                        | 0.00 | 6.42 | *    | *    | * | 1 | 3 | VTPGSTC[339]AVFGLGGVGLSVVM[147]GC[339]K   | 1 |
| ADH6_HUMAN (P28332) Alcohol dehydrogenase 6 (EC 1.1.1.1) [MASS=39072]                                                                                                | 0.00 | 7.88 | 1.45 | 0.00 | 1 | 2 | 2 | M[147]STTGQVIRC[339]K                     | 1 |
|                                                                                                                                                                      |      |      |      |      |   |   | 2 | PGAPFSIEEVEVAPPKAK                        | 1 |
| ADIP_HUMAN (Q9Y2D8) Afadin- and alpha-actinin-binding protein (ADIP) (Afadin DIL domain-interacting protein) (SSX2-interacting protein) [MASS=71236]                 | 0.00 | 3.26 | 1.49 | 0.00 | 1 | 1 | 2 | RELNIVAVLNC[339]M[147]NELLVLQR            | 1 |
| ADNP_HUMAN (Q9H2P0) Activity-dependent neuroprotector (Activity-dependent neuroprotective protein) [MASS=123562]                                                     | *    | 8.98 | *    | *    | * | 4 | 3 | HEMDFDAEWLFENHDEKDSRVNASK                 | 1 |
|                                                                                                                                                                      |      |      |      |      |   |   | 2 | IGSLASGNVRSLSQQM[147]VNRLSIPK             | 1 |
|                                                                                                                                                                      |      |      |      |      |   |   | 2 | TQNGQDKTNAPSRLNQSPSLAPVK                  | 1 |
|                                                                                                                                                                      |      |      |      |      |   |   | 3 | C[330]IHC[339]LGVYTSNMTASTITLHLVHC[339]R  | 1 |

|                                                                                                                                                                                                                                                                               |      |       |      |      |   |   |  |   |                                               |   |
|-------------------------------------------------------------------------------------------------------------------------------------------------------------------------------------------------------------------------------------------------------------------------------|------|-------|------|------|---|---|--|---|-----------------------------------------------|---|
|                                                                                                                                                                                                                                                                               |      |       |      |      |   |   |  | 2 | YFAGNLASGGAAGATSLC[330]FVYPLDFAR              | 3 |
| ADT1_HUMAN (P12235) ADP/ATP translocase 1 (Adenine nucleotide translocator 1) (ANT 1) (ADP,ATP carrier protein 1) (Solute carrier family 25 member 4) (ADP,ATP carrier protein, heart/skeletal muscle isoform T1) [MASS=32933]                                                | 1.00 | 17.17 | 1.40 | 0.05 | 6 | 3 |  | 2 | EFHGLGDC[339]IIK                              | 1 |
|                                                                                                                                                                                                                                                                               |      |       |      |      |   |   |  | 1 | EFHGLGDC[339]IIK                              | 2 |
|                                                                                                                                                                                                                                                                               |      |       |      |      |   |   |  | 2 | YFAGNLASGGAAGATSLC[339]FVYPLDFAR              | 2 |
|                                                                                                                                                                                                                                                                               |      |       |      |      |   |   |  | 2 | EFHGLGDC[330]IIK                              | 1 |
|                                                                                                                                                                                                                                                                               |      |       |      |      |   |   |  | 3 | YKQLFLGGVDRHK                                 | 1 |
|                                                                                                                                                                                                                                                                               |      |       |      |      |   |   |  | 1 | EFHGLGDC[330]IIK                              | 2 |
| ADT2_HUMAN (P05141) ADP/ATP translocase 2 (Adenine nucleotide translocator 2) (ANT 2) (ADP,ATP carrier protein 2) (Solute carrier family 25 member 5) (ADP,ATP carrier protein, fibroblast isoform) [MASS=32764]                                                              | 1.00 | 2.69  | 0.04 | 0.00 | 1 | 1 |  | 1 | GLGDC[330]LVK                                 | 2 |
|                                                                                                                                                                                                                                                                               |      |       |      |      |   |   |  | 2 | GLGDC[339]LVK                                 | 1 |
| AFF4_HUMAN (Q9UHB7) AF4/FMR2 family member 4 (ALL1-fused gene from chromosome 5q31) (Major CDK9 elongation factor-associated protein) [MASS=127458]                                                                                                                           | 0.00 | 5.67  | *    | *    | * | 3 |  | 3 | EDKLSSRIQSM[147]LGNYDEM[147]K                 | 1 |
|                                                                                                                                                                                                                                                                               |      |       |      |      |   |   |  | 3 | VPFSSGQHSTQSFPPSLMSKSNMQLKPTAYVR              | 1 |
|                                                                                                                                                                                                                                                                               |      |       |      |      |   |   |  | 2 | YPLIVKIDLNLLTR                                | 1 |
| AFG32_HUMAN (Q9Y4W6) AFG3-like protein 2 (EC 3.4.24.-) (Paraplegin-like protein) [MASS=88483]                                                                                                                                                                                 | *    | 7.03  | *    | *    | * | 2 |  | 3 | MC[339]M[147]TLGGRASEEIFFGRITTTGAQDDLRL       | 1 |
|                                                                                                                                                                                                                                                                               |      |       |      |      |   |   |  | 2 | ATAGEANVPFITVSGSEFLEM[147]FVGVGPAR            | 1 |
| AIOL_HUMAN (Q9UKT9) Zinc finger protein Aiolos [MASS=57943]                                                                                                                                                                                                                   | 0.00 | 4.72  | 1.67 | 0.00 | 1 | 1 |  | 3 | C[339]DHC[339]RVLFLLDYVM[147]FTIHMGC[339]HGFR | 1 |
| AKAP6_HUMAN (Q13023) A-kinase anchor protein 6 (Protein kinase A-anchoring protein 6) (PRKA6) (A-kinase anchor protein 100 kDa) (AKAP 100) (mAKAP) [MASS=256664]                                                                                                              | 0.39 | 1.90  | 0.38 | 0.00 | 1 | 2 |  | 3 | QKFTDEGESIKLPNSSQSSISPVGC[330]VNGK            | 1 |
|                                                                                                                                                                                                                                                                               |      |       |      |      |   |   |  | 3 | TLTC[339]EENLLNLHEKR                          | 1 |
| AKAP9_HUMAN (Q99996) A-kinase anchor protein 9 (Protein kinase A-anchoring protein 9) (PRKA9) (A-kinase anchor protein 450 kDa) (AKAP 450) (A-kinase anchor protein 350 kDa) (AKAP 350) (hgAKAP 350) (AKAP 120-like protein) (Protein hyperion) (Protein yotia) [MASS=453664] | 0.00 | 2.89  | 0.11 | 2.60 | 3 | 5 |  | 3 | DLELTQC[330]YKQIKDM[147]QEQQQFETEM[147]LQK    | 1 |
|                                                                                                                                                                                                                                                                               |      |       |      |      |   |   |  | 3 | MLYDAQLSEEQGRNLELQVLLSEKVR                    | 1 |
|                                                                                                                                                                                                                                                                               |      |       |      |      |   |   |  | 3 | EQESEKPSQELLEYNIQK                            | 1 |
|                                                                                                                                                                                                                                                                               |      |       |      |      |   |   |  | 3 | IQSIPENSVNVAIDHLSKDKPELEVLTEDALK              | 1 |
|                                                                                                                                                                                                                                                                               |      |       |      |      |   |   |  | 2 | AVIQC[330]LR                                  | 3 |

|                                                                                                                                                                             |      |       |      |      |   |   |   |                                         |   |
|-----------------------------------------------------------------------------------------------------------------------------------------------------------------------------|------|-------|------|------|---|---|---|-----------------------------------------|---|
| AKT1_HUMAN (P31749) RAC-alpha serine/threonine-protein kinase (EC 2.7.11.1) (RAC-PK-alpha) (Protein kinase B) (PKB) (C-AKT) [MASS=55686]                                    | *    | 9.17  | *    | *    | * | 2 | 3 | YSFQTHDRLC[339]FVM[147]EYANGGELFFHLSR   | 1 |
|                                                                                                                                                                             |      |       |      |      |   |   | 2 | DGHIKITDFGLC[339]KEGIK                  | 1 |
| ALBU_HUMAN (P02768) Serum albumin precursor [MASS=69366]                                                                                                                    | 1.00 | 5.58  | 0.69 | 0.20 | 3 | 2 | 3 | MPC[339]AEDYLSVVLNQLC[339]VLHEK         | 1 |
|                                                                                                                                                                             |      |       |      |      |   |   | 2 | C[330]C[330]AAADPHEC[330]YAK            | 1 |
|                                                                                                                                                                             |      |       |      |      |   |   | 3 | M[147]PC[330]AEDYLSVVLNQLC[330]VLHEK    | 1 |
| ALDH2_HUMAN (P05091) Aldehyde dehydrogenase, mitochondrial precursor (EC 1.2.1.3) (ALDH class 2) (ALDH1) (ALDH-E2) [MASS=56381]                                             | 1.00 | 16.44 | 1.77 | 0.07 | 3 | 4 | 3 | KILGYINTGKQEGAK                         | 1 |
|                                                                                                                                                                             |      |       |      |      |   |   | 3 | GYFIQPTVFGDVQDGMTIAKEEIFGPVM[147]QILK   | 1 |
|                                                                                                                                                                             |      |       |      |      |   |   | 3 | KTFPTVNPSTGEVIC[339]QVAEGDKEDVDK        | 1 |
|                                                                                                                                                                             |      |       |      |      |   |   | 2 | LLC[330]GGGIAADR                        | 1 |
|                                                                                                                                                                             |      |       |      |      |   |   | 2 | LLC[339]GGGIAADR                        | 1 |
| ALDOA_HUMAN (P04075) Fructose-bisphosphate aldolase A (EC 4.1.2.13) (Muscle-type aldolase) (Lung cancer antigen NY-LU-1) [MASS=39289]                                       | 1.00 | 3.31  | *    | *    | * | 2 | 1 | C[330]AQYK                              | 1 |
|                                                                                                                                                                             |      |       |      |      |   |   | 2 | C[330]QYVTEK                            | 1 |
| ALDOB_HUMAN (P05062) Fructose-bisphosphate aldolase B (EC 4.1.2.13) (Liver-type aldolase) [MASS=39342]                                                                      | 1.00 | 7.99  | *    | *    | * | 1 | 3 | ELSEIAQSIVANGKGILAADESVGTM[147]GNR      | 1 |
| ALDOC_HUMAN (P09972) Fructose-bisphosphate aldolase C (EC 4.1.2.13) (Brain-type aldolase) [MASS=39324]                                                                      | 1.00 | 15.98 | 0.75 | 0.00 | 1 | 2 | 3 | RAEVNGLAAQKQYEGSGEDGGAAAQSLYIANHAY      | 1 |
|                                                                                                                                                                             |      |       |      |      |   |   | 3 | C[330]JGGVIFFHETLYQKDDNGVPFVR           | 1 |
| ALG6_HUMAN (Q9Y672) Dolichyl pyrophosphate Man9GlcNAc2 alpha-1,3-glucosyltransferase (EC 2.4.1.-) (Dolichyl-P-Glc:Man9GlcNAc2-PP-dolichyl glucosyltransferase) [MASS=58180] | 0.00 | 3.94  | 0.56 | 0.00 | 1 | 1 | 3 | FTLVSC[330]ALSFFLFSFQVHEK               | 1 |
|                                                                                                                                                                             |      |       |      |      |   |   | 3 | PVAQDQESLGLGPK                          | 1 |
| ALMS1_HUMAN (Q8TCU4) Alstrom syndrome protein 1 [MASS=460933]                                                                                                               | *    | 2.09  | *    | *    | * | 5 | 3 | AWLQAHPGRILPPLSPPQHRYSEGER              | 1 |
|                                                                                                                                                                             |      |       |      |      |   |   | 2 | FNLAHDC[339]GYSISELNEDDRK               | 1 |
|                                                                                                                                                                             |      |       |      |      |   |   | 2 | AELFGHGR                                | 1 |
|                                                                                                                                                                             |      |       |      |      |   |   | 2 | KTGIPTLPSTFYSHTEK                       | 1 |
| AMOL1_HUMAN (Q8IY63) Angiotensin-like protein 1 [MASS=106573]                                                                                                               | *    | 2.30  | *    | *    | * | 1 | 3 | YLEESTIRHFAMNAAATAAER                   | 1 |
| AMOT_HUMAN (Q4VCS5) Angiotensin [MASS=118085]                                                                                                                               | *    | 8.67  | *    | *    | * | 3 | 3 | QGNC[330]QPTNVSEYNAAALMELLREK           | 1 |
|                                                                                                                                                                             |      |       |      |      |   |   | 3 | GSLGILLGGDYRAEYVPSTPSPVPPSTPLLSAHSK     | 1 |
|                                                                                                                                                                             |      |       |      |      |   |   | 3 | AEYVPSTPSPVPPSTPLLSAHSKTSRDC[330]STQTER | 1 |
| ANGL1_HUMAN (O95841) Angiotensin-related protein 1 precursor (Angiotensin-like 1) (Angiotensin-3) (ANG-3) [MASS=56719]                                                      | *    | 4.89  | *    | *    | * | 1 | 3 | GGWWYNAC[339]AHSNLNGVWYRGGHYR           | 1 |

|                                                                                                                                                                 |      |      |      |      |   |    |   |                                           |   |
|-----------------------------------------------------------------------------------------------------------------------------------------------------------------|------|------|------|------|---|----|---|-------------------------------------------|---|
| ANK2_HUMAN (Q01484) Ankyrin-2 (Brain ankyrin) (Ankyrin-B) (Ankyrin, nonerythroid) [MASS=430341]                                                                 | 0.90 | 1.76 | 0.71 | 0.08 | 2 | 5  | 2 | GGQIDAKTRDGLTPLHC[330]AAR                 | 1 |
|                                                                                                                                                                 |      |      |      |      |   |    | 2 | HSTLSSSAK                                 | 1 |
|                                                                                                                                                                 |      |      |      |      |   |    | 2 | VRDTTQEPC[330]GR                          | 1 |
|                                                                                                                                                                 |      |      |      |      |   |    | 3 | C[330]FC[330]M[147]TDDKVDKTLQEQENFAEVAR   | 1 |
|                                                                                                                                                                 |      |      |      |      |   |    | 1 | PVRRK                                     | 1 |
| ANK3_HUMAN (Q12955) Ankyrin-3 (ANK-3) (Ankyrin-G) [MASS=480400]                                                                                                 | 0.00 | 4.20 | 1.15 | 0.00 | 1 | 10 | 2 | IC[339]RIITKDFPQYFAVVS                    | 1 |
|                                                                                                                                                                 |      |      |      |      |   |    | 2 | SSSSEKTPDK                                | 1 |
|                                                                                                                                                                 |      |      |      |      |   |    | 3 | KM[147]QSELSDEEESTSRNTSLSETSR             | 1 |
|                                                                                                                                                                 |      |      |      |      |   |    | 2 | RM[147]LSSNIPDGF[339]EQSAFPK              | 1 |
|                                                                                                                                                                 |      |      |      |      |   |    | 3 | IPVKNTPRDNIIAVR                           | 1 |
|                                                                                                                                                                 |      |      |      |      |   |    | 2 | KAC[330]ATQKQGQPEK                        | 1 |
|                                                                                                                                                                 |      |      |      |      |   |    | 2 | AEEKAPSLPSSPEKM[147]VLSQQTEDSK            | 1 |
|                                                                                                                                                                 |      |      |      |      |   |    | 3 | NVETPTVEPNPSIPTSGEC[339]QEGTSSSGSLEK      | 1 |
|                                                                                                                                                                 |      |      |      |      |   |    | 2 | VDVISSAKITM[147]ASSLSSPVK                 | 1 |
|                                                                                                                                                                 |      |      |      |      |   |    | 2 | SKDM[147]SQEDR                            | 1 |
| ANKR6_HUMAN (Q9Y2G4) Ankyrin repeat domain-containing protein 6 [MASS=75722]                                                                                    | 0.00 | 6.21 | 2.09 | 0.00 | 1 | 2  | 2 | C[339]SSPPPPHEFRAYQLYTLYR                 | 1 |
|                                                                                                                                                                 |      |      |      |      |   |    | 2 | SRPKVSAFSDPTPPADQQPGHQK                   | 1 |
| ANM3_HUMAN (O60678) Protein arginine N-methyltransferase 3 (EC 2.1.1.-) (Heterogeneous nuclear ribonucleoprotein methyltransferase-like protein 3) [MASS=59903] | 0.00 | 2.45 | *    | *    | * | 1  | 3 | SEHQFNIDSM[147]VHK                        | 5 |
| ANR11_HUMAN (Q6UB99) Ankyrin repeat domain-containing protein 11 (Ankyrin repeat-containing cofactor 1) [MASS=298068]                                           | 0.00 | 1.84 | 0.40 | 0.00 | 1 | 2  | 3 | TIANQAVPFSAC[339]TMLLDSEVYNMPLESQGDNK     | 1 |
|                                                                                                                                                                 |      |      |      |      |   |    | 2 | EQTEKHKSVPGYLSEK                          | 1 |
| ANR12_HUMAN (Q6UB98) Ankyrin repeat domain-containing protein 12 (Ankyrin repeat-containing cofactor 2) (GAC-1 protein) [MASS=235652]                           | 0.00 | 4.80 | 0.88 | 0.00 | 1 | 5  | 3 | EKLIVSNEQEVL                              | 1 |
|                                                                                                                                                                 |      |      |      |      |   |    | 2 | IKDEDHSPTFENSDC[330]TLKK                  | 1 |
|                                                                                                                                                                 |      |      |      |      |   |    | 2 | M[147]ERKTFEK                             | 1 |
|                                                                                                                                                                 |      |      |      |      |   |    | 2 | QM[147]ALLMQM[147]TARDNSPDSTPNHPSQTTPAQK  | 1 |
|                                                                                                                                                                 |      |      |      |      |   |    | 3 | ISTSC[339]SVIPETSNSDMQTKKEYVVSGEHK        | 1 |
| ANR52_HUMAN (Q8NB46) Ankyrin repeat domain-containing protein 52 [MASS=115057]                                                                                  | 0.00 | 4.18 | 1.77 | 0.00 | 1 | 2  | 2 | TALFLATER                                 | 1 |
|                                                                                                                                                                 |      |      |      |      |   |    | 3 | GFTPLHVAAVSTNGALC[339]LELLVNNGADVNYQVPEGK | 1 |
| ANRA2_HUMAN (Q9H9E1) Ankyrin repeat family A protein 2 (RFXANK-like 2) [MASS=34272]                                                                             | 0.00 | 3.19 | 0.26 | 0.00 | 1 | 1  | 2 | ESALSLAC[330]SK                           | 1 |

|                                                                                                                                                                                                                                                                                                |      |      |      |      |   |   |   |                               |   |
|------------------------------------------------------------------------------------------------------------------------------------------------------------------------------------------------------------------------------------------------------------------------------------------------|------|------|------|------|---|---|---|-------------------------------|---|
| ANXA2_HUMAN (P07355) Annexin A2<br>(Annexin II) (Lipocortin II) (Calpactin I heavy<br>chain) (Chromobindin-8) (p36) (Protein I)<br>(Placental anticoagulant protein IV) (PAP-IV)<br>[MASS=38473]                                                                                               | 1.00 | 7.10 | 1.25 | 0.00 | 2 | 1 | 3 | GDLENAFLNLVQC[339]IQNKPLYFADR | 1 |
|                                                                                                                                                                                                                                                                                                |      |      |      |      |   |   | 3 | GDLENAFLNLVQC[330]IQNKPLYFADR | 1 |
| ANXA6_HUMAN (P08133) Annexin A6<br>(Annexin VI) (Lipocortin VI) (P68) (P70)<br>(Protein III) (Chromobindin-20) (67 kDa<br>calelectrin) (Calphobindin-II) (CPB-II)<br>[MASS=75742]                                                                                                              | 1.00 | 5.95 | 0.75 | 0.29 | 2 | 3 | 2 | DAISGIGTDEKC[339]LIEILASR     | 1 |
|                                                                                                                                                                                                                                                                                                |      |      |      |      |   |   | 2 | QRQEVLC[330]QSYK              | 1 |
|                                                                                                                                                                                                                                                                                                |      |      |      |      |   |   | 2 | M[147]LVVLLQGTR               | 1 |
| AOFB_HUMAN (P27338) Amine oxidase [flavin-<br>containing] B (EC 1.4.3.4) (Monoamine oxidase<br>type B) (MAO-B) [MASS=58631]                                                                                                                                                                    | 0.00 | 7.13 | *    | *    | * | 2 | 2 | LIGLTTIFSATALGFLAHK           | 1 |
|                                                                                                                                                                                                                                                                                                |      |      |      |      |   |   | 2 | PEGNYAAIMGFILAHKAR            | 1 |
| AP1B1_HUMAN (Q10567) AP-1 complex<br>subunit beta-1 (Adapter-related protein<br>complex 1 beta-1 subunit) (Beta-adaptin 1)<br>(Adaptor protein complex AP-1 beta-1 subunit)<br>(Golgi adaptor HA1/AP1 adaptin beta subunit)<br>(Clathrin assembly protein complex 1 beta larg<br>[MASS=104606] | 0.00 | 5.16 | *    | *    | * | 4 | 2 | C[330]LKDEDPYVRK              | 1 |
|                                                                                                                                                                                                                                                                                                |      |      |      |      |   |   | 2 | ITEYLC[330]EPLRK              | 1 |
|                                                                                                                                                                                                                                                                                                |      |      |      |      |   |   | 2 | VDKITEYLC[339]EPLRK           | 1 |
|                                                                                                                                                                                                                                                                                                |      |      |      |      |   |   | 3 | NVEGQDMLYQSLK                 | 1 |
| AP2A1_HUMAN (O95782) AP-2 complex<br>subunit alpha-1 (Adapter-related protein<br>complex 2 alpha-1 subunit) (Alpha-adaptin A)<br>(Adaptor protein complex AP-2 alpha-1 subunit)<br>(Clathrin assembly protein complex 2 alpha-A<br>large chain) (100 kDa coated vesicle prote<br>[MASS=107554] | 1.00 | 7.27 | 0.40 | 0.79 | 2 | 4 | 1 | KYVC[339]K                    | 1 |
|                                                                                                                                                                                                                                                                                                |      |      |      |      |   |   | 2 | AC[330]NQLGQFLQHR             | 1 |
|                                                                                                                                                                                                                                                                                                |      |      |      |      |   |   | 3 | ALLLSTYIKFINLFPETKATIQQVLR    | 1 |
|                                                                                                                                                                                                                                                                                                |      |      |      |      |   |   | 3 | AC[330]NQLGQFLQHR             | 1 |
|                                                                                                                                                                                                                                                                                                |      |      |      |      |   |   | 3 | IVSSASTDLQDYTYFVPAPWLSVKLLR   | 1 |
| AP2B1_HUMAN (P63010) AP-2 complex<br>subunit beta-1 (Adapter-related protein<br>complex 2 beta-1 subunit) (Beta-adaptin)<br>(Plasma membrane adaptor HA2/AP2 adaptin<br>beta subunit) (Clathrin assembly protein<br>complex 2 beta large chain) (AP105B)<br>[MASS=104552]                      | 1.00 | 2.67 | 0.90 | 0.10 | 4 | 1 | 3 | YPNKYESIATLC[330]ENLDSLDEPDAR | 1 |

|                                                                                                                                                                                                                                                                              |      |      |      |      |   |   |                                                             |                 |   |
|------------------------------------------------------------------------------------------------------------------------------------------------------------------------------------------------------------------------------------------------------------------------------|------|------|------|------|---|---|-------------------------------------------------------------|-----------------|---|
| AP2M1_HUMAN (Q96CW1) AP-2 complex subunit mu-1 (Adaptin mu-1) (AP-2 mu-2 chain) (Clathrin coat assembly protein AP50) (Clathrin coat-associated protein AP50) (Plasma membrane adaptor AP-2 50 kDa protein) (HA2 50 kDa subunit) (Clathrin assembly protein co [MASS=49654]  | *    | 3.45 | *    | *    | * | 1 | 2                                                           | TFITQQGIKSQHQTK | 1 |
| AP3B2_HUMAN (Q13367) AP-3 complex subunit beta-2 (Adapter-related protein complex 3 beta-2 subunit) (Beta3B-adaptin) (Adaptor protein complex AP-3 beta-2 subunit) (AP-3 complex beta-2 subunit) (Clathrin assembly protein complex 3 beta-2 large chain) (Neu [MASS=119058] | 0.00 | 3.05 | 0.69 | 0.00 | 1 | 2 | 2 EAASDMSPYVR<br>3 LC[330]NLLIDVVEEWGQVVIISMLTR             | 1<br>1          |   |
| AP4B1_HUMAN (Q9Y6B7) AP-4 complex subunit beta-1 (Adapter-related protein complex 4 beta 1 subunit) (Beta subunit of AP-4) (AP-4 adapter complex beta subunit) [MASS=83261]                                                                                                  | 0.00 | 3.52 | 0.91 | 0.00 | 1 | 1 | 3 LVYLYMC[339]TYAPLKPDLALLAINTLC[339]K                      | 1               |   |
| APEX2_HUMAN (Q9UBZ4) DNA-(apurinic or apyrimidinic site) lyase 2 (EC 4.2.99.18) (Apurinic-apyrimidinic endonuclease 2) (AP endonuclease 2) (APEX nuclease 2) (APEX nuclease-like 2) (AP endonuclease XTH2) [MASS=57400]                                                      | 0.00 | 2.12 | 0.94 | 0.00 | 1 | 1 | 3 SGYSGVATFC[339]K                                          | 1               |   |
| APMAP_HUMAN (Q9HDC9) Adipocyte plasma membrane-associated protein (BSCv protein) [MASS=46480]                                                                                                                                                                                | *    | 9.86 | *    | *    | * | 2 | 1 VYVSGLM[147]K<br>3 VTFLMLAVSLTVPLLGAMM[147]LLESPIDPQPLSFK | 1<br>1          |   |
| APOA_HUMAN (P08519) Apolipoprotein(a) precursor (EC 3.4.21.-) (Apo(a)) (Lp(a)) [MASS=501317]                                                                                                                                                                                 | *    | 0.26 | *    | *    | * | 1 | 3 FVTWIEGMMRNN<br>2 LSKELQAAQARLGADM[147]EDVC[330]GR        | 1<br>3          |   |
| APOE_HUMAN (P02649) Apolipoprotein E precursor (Apo-E) [MASS=36154]                                                                                                                                                                                                          | 0.00 | 9.78 | 0.38 | 0.00 | 1 | 2 | 2 M[147]EEM[147]GSRTR                                       | 1               |   |
| ARHG3_HUMAN (Q9NR81) Rho guanine nucleotide exchange factor 3 (Exchange factor found in platelets and leukemic and neuronal tissues) (XPLN) [MASS=59782]                                                                                                                     | *    | 5.32 | *    | *    | * | 1 | 3 LHVFLFQEVLVITRAVTHNEQLC[339]YQLYR                         | 1               |   |



|                                                                                                                                                                                          |      |       |      |      |   |   |   |                                           |   |
|------------------------------------------------------------------------------------------------------------------------------------------------------------------------------------------|------|-------|------|------|---|---|---|-------------------------------------------|---|
| ARHG6_HUMAN (Q15052) Rho guanine nucleotide exchange factor 6 (Rac/Cdc42 guanine nucleotide exchange factor 6) (PAK-interacting exchange factor alpha) (Alpha-Pix) (COOL-2) [MASS=87498] | *    | 3.87  | *    | *    | * | 1 | 3 | SSLSAANTSQTNPQGAVSSTVSGLRQSK              | 1 |
| ARHG8_HUMAN (Q7Z628) Neuroepithelial cell-transforming gene 1 protein (p65 Net1 proto-oncogene) (Rho guanine nucleotide exchange factor 8) [MASS=67740]                                  | 0.00 | 7.21  | 1.02 | 0.00 | 1 | 2 | 2 | LNAYRGYC[330]SNQLAAK                      | 1 |
|                                                                                                                                                                                          |      |       |      |      |   |   | 3 | ASGLSTEGATGPSADTSGSELDGRC[330]SLR         | 1 |
| ARHGA_HUMAN (O15013) Rho guanine nucleotide exchange factor 10 [MASS=151611]                                                                                                             | *    | 4.31  | *    | *    | * | 3 | 3 | M[147]RDLM[147]ASTVGVVEIQQLRQK            | 1 |
|                                                                                                                                                                                          |      |       |      |      |   |   | 1 | LVKAAK                                    | 1 |
|                                                                                                                                                                                          |      |       |      |      |   |   | 3 | DALPSGGAGSSLSQGDPAAIWLGDSLGSMTQK          | 1 |
| ARI2_HUMAN (O95376) Protein ariadne-2 homolog (ARI-2) (Triad1 protein) [MASS=57819]                                                                                                      | 0.00 | 2.23  | 4.30 | 0.00 | 1 | 1 | 2 | THGSEYYEC[339]SR                          | 1 |
|                                                                                                                                                                                          |      |       |      |      |   |   | 3 | THGSEYYEC[339]SR                          | 1 |
| ARI4A_HUMAN (P29374) AT-rich interactive domain-containing protein 4A (ARID domain-containing protein 4A) (Retinoblastoma-binding protein 1) (RBBP-1) [MASS=142666]                      | 0.00 | 6.52  | 4.92 | 0.00 | 1 | 4 | 3 | IENGM[147]EM[147]TNTVSQERTSDC[330]IGSEGMK | 1 |
|                                                                                                                                                                                          |      |       |      |      |   |   | 2 | SVKSESDITIEVDSIAEESQEGLC[339]ER           | 1 |
|                                                                                                                                                                                          |      |       |      |      |   |   | 3 | LVYHQGGC[339]DNIDSGAVWK                   | 1 |
|                                                                                                                                                                                          |      |       |      |      |   |   | 2 | ISFLQEKLQEIR                              | 1 |
| ARL3_HUMAN (P36405) ADP-ribosylation factor-like protein 3 [MASS=20455]                                                                                                                  | 0.88 | 15.93 | 1.21 | 0.00 | 1 | 1 | 3 | RFEETGQELAELEEEKLSC[339]VPVLIFANK         | 1 |
| ARP8_HUMAN (Q9H981) Actin-related protein 8 [MASS=70425]                                                                                                                                 | *    | 2.08  | *    | *    | * | 1 | 2 | YLEIPLKDLKYR                              | 1 |
| ARRD3_HUMAN (Q96B67) Arrestin domain-containing protein 3 [MASS=46394]                                                                                                                   | 0.00 | 8.94  | 1.17 | 0.00 | 1 | 2 | 2 | EVKQLVANLR                                | 1 |
|                                                                                                                                                                                          |      |       |      |      |   |   | 3 | FLPPPLYSEIDPNPDQSADDRPSC[339]PSR          | 1 |
| ARS2_HUMAN (Q9BXP5) Arsenite-resistance protein 2 [MASS=100666]                                                                                                                          | *    | 3.77  | *    | *    | * | 2 | 1 | SDYDR                                     | 1 |
|                                                                                                                                                                                          |      |       |      |      |   |   | 3 | LLLYLRIVHSLDYYNTC[330]EYPNEDEM[147]PNR    | 1 |
| AT12A_HUMAN (P54707) Potassium-transporting ATPase alpha chain 2 (EC 3.6.3.10) (Proton pump) (Non-gastric H(+)/K(+) ATPase subunit alpha) [MASS=115898]                                  | 0.00 | 2.11  | *    | *    | * | 2 | 3 | ADIGIAMGIAGSDDAAK                         | 1 |
|                                                                                                                                                                                          |      |       |      |      |   |   | 2 | KNC[339]LVK                               | 1 |

|                                                                                                                                                   |      |       |      |      |    |   |  |   |                                        |   |
|---------------------------------------------------------------------------------------------------------------------------------------------------|------|-------|------|------|----|---|--|---|----------------------------------------|---|
|                                                                                                                                                   |      |       |      |      |    |   |  | 3 | NLEAVETLGSTSTIC[330]SDKTGTLTQNR        | 1 |
|                                                                                                                                                   |      |       |      |      |    |   |  | 2 | C[330]SSILLHGK                         | 1 |
|                                                                                                                                                   |      |       |      |      |    |   |  | 2 | AC[330]VVHGSDLK                        | 2 |
| AT1A1_HUMAN (P05023) Sodium/potassium-transporting ATPase alpha-1 chain precursor (EC 3.6.3.9) (Sodium pump 1) (Na+/K+ ATPase 1) [MASS=112895]    | 1.00 | 11.05 | 0.47 | 0.26 | 6  | 7 |  | 3 | KIVEFTC[330]HTAFFVSIVVQWADLVIC[330]KTR | 1 |
|                                                                                                                                                   |      |       |      |      |    |   |  | 2 | AC[339]VVHGSDLK                        | 1 |
|                                                                                                                                                   |      |       |      |      |    |   |  | 3 | NIAFFSTNC[339]VEGTARGIVVYTGDR          | 1 |
|                                                                                                                                                   |      |       |      |      |    |   |  | 2 | IISANGC[330]K                          | 1 |
|                                                                                                                                                   |      |       |      |      |    |   |  | 2 | IAGLC[330]NR                           | 1 |
|                                                                                                                                                   |      |       |      |      |    |   |  | 1 | C[330]SSILLHGK                         | 1 |
| AT1A2_HUMAN (P50993) Sodium/potassium-transporting ATPase alpha-2 chain precursor (EC 3.6.3.9) (Sodium pump 2) (Na+/K+ ATPase 2) [MASS=112265]    | 0.00 | 1.96  | *    | *    | *  | 1 |  | 2 | GAGREYSPAATTAENGGGKK                   | 1 |
|                                                                                                                                                   |      |       |      |      |    |   |  | 2 | KYNTDC[330]VQGLTHSK                    | 1 |
|                                                                                                                                                   |      |       |      |      |    |   |  | 2 | VLGFC[339]HYLPEEQFPK                   | 1 |
|                                                                                                                                                   |      |       |      |      |    |   |  | 3 | SPDC[330]THDNPLETR                     | 1 |
|                                                                                                                                                   |      |       |      |      |    |   |  | 1 | IISAHGC[330]K                          | 1 |
|                                                                                                                                                   |      |       |      |      |    |   |  | 2 | NITFFSTNC[330]VEGTAR                   | 2 |
| AT1A3_HUMAN (P13637) Sodium/potassium-transporting ATPase alpha-3 chain (EC 3.6.3.9) (Sodium pump 3) (Na+/K+ ATPase 3) (Alpha(III)) [MASS=111734] | 1.00 | 9.97  | 0.52 | 0.27 | 14 | 8 |  | 2 | YNTDC[330]VQGLTHSK                     | 1 |
|                                                                                                                                                   |      |       |      |      |    |   |  | 2 | VLGFC[330]HYLPEEQFPK                   | 2 |
|                                                                                                                                                   |      |       |      |      |    |   |  | 2 | IISAHGC[330]K                          | 1 |
|                                                                                                                                                   |      |       |      |      |    |   |  | 2 | SPDC[339]THDNPLETR                     | 2 |
|                                                                                                                                                   |      |       |      |      |    |   |  | 2 | M[147]SVEEVC[330]RK                    | 1 |
|                                                                                                                                                   |      |       |      |      |    |   |  | 2 | DVAGDASESALLK                          | 1 |
|                                                                                                                                                   |      |       |      |      |    |   |  | 2 | SPDC[330]THDNPLETR                     | 1 |
| AT1A4_HUMAN (Q13733) Sodium/potassium-transporting ATPase alpha-4 chain (EC 3.6.3.9) (Sodium pump 4) (Na+/K+ ATPase 4) [MASS=114166]              | 0.00 | 2.43  | *    | *    | *  | 1 |  | 3 | GGEKMQINVQEVVLGDLVEIKGGDR              | 1 |
| AT1B1_HUMAN (P05026) Sodium/potassium-transporting ATPase subunit beta-1 (Sodium/potassium-dependent ATPase beta-1 subunit) [MASS=35061]          | 1.00 | 8.91  | 0.43 | 0.03 | 3  | 2 |  | 2 | YNPNVLPVQC[330]TGKR                    | 1 |
|                                                                                                                                                   |      |       |      |      |    |   |  | 2 | YNPNVLPVQC[330]TGK                     | 1 |
|                                                                                                                                                   |      |       |      |      |    |   |  | 2 | YNPNVLPVQC[339]TGK                     | 1 |

|                                                                                                                                                                                                                                                                              |      |       |      |      |   |   |   |                                         |   |
|------------------------------------------------------------------------------------------------------------------------------------------------------------------------------------------------------------------------------------------------------------------------------|------|-------|------|------|---|---|---|-----------------------------------------|---|
| AT1B2_HUMAN (P14415) Sodium/potassium-transporting ATPase subunit beta-2 (Sodium/potassium-dependent ATPase beta-2 subunit) [MASS=33326]                                                                                                                                     | 0.94 | 15.52 | 0.66 | 0.17 | 2 | 3 | 2 | TENLDVIVNVSDTESWDQHVQK                  | 1 |
|                                                                                                                                                                                                                                                                              |      |       |      |      |   |   | 2 | FLNVTPNVEVNEEC[339]R                    | 1 |
|                                                                                                                                                                                                                                                                              |      |       |      |      |   |   | 2 | NDVC[330]RPGR                           | 1 |
| AT2A2_HUMAN (P16615) Sarcoplasmic/endoplasmic reticulum calcium ATPase 2 (EC 3.6.3.8) (Calcium pump 2) (SERCA2) (SR Ca(2+)-ATPase 2) (Calcium-transporting ATPase sarcoplasmic reticulum type, slow twitch skeletal muscle isoform) (Endoplasmic reticulum cla [MASS=114756] | 1.00 | 1.92  | 0.97 | 0.02 | 3 | 2 | 2 | C[339]THIR                              | 1 |
|                                                                                                                                                                                                                                                                              |      |       |      |      |   |   | 2 | NYLEPGKEC[330]VQPATK                    | 1 |
|                                                                                                                                                                                                                                                                              |      |       |      |      |   |   | 2 | NYLEPGKEC[339]VQPATK                    | 1 |
| AT2B1_HUMAN (P20020) Plasma membrane calcium-transporting ATPase 1 (EC 3.6.3.8) (PMCA1) (Plasma membrane calcium pump isoform 1) (Plasma membrane calcium ATPase isoform 1) [MASS=138754]                                                                                    | 1.00 | 8.66  | 0.58 | 0.00 | 1 | 5 | 2 | TEC[330]ALLGLLLDLKR                     | 1 |
|                                                                                                                                                                                                                                                                              |      |       |      |      |   |   | 2 | HLDAC[330]ETM[147]GNATAIC[330]SDK       | 2 |
|                                                                                                                                                                                                                                                                              |      |       |      |      |   |   | 3 | TMMKNILGHAFYQLVVVFTLLFAGEK              | 1 |
|                                                                                                                                                                                                                                                                              |      |       |      |      |   |   | 2 | AQDGAAM[147]EMQPLKSEEGGDGDEKDK          | 1 |
|                                                                                                                                                                                                                                                                              |      |       |      |      |   |   | 3 | AGLLMSAITVIILVLYFVIDTFWVQK              | 1 |
| AT2B2_HUMAN (Q01814) Plasma membrane calcium-transporting ATPase 2 (EC 3.6.3.8) (PMCA2) (Plasma membrane calcium pump isoform 2) (Plasma membrane calcium ATPase isoform 2) [MASS=136875]                                                                                    | 1.00 | 5.95  | 1.08 | 0.00 | 1 | 5 | 3 | ILNGAGEPRVFRPR                          | 1 |
|                                                                                                                                                                                                                                                                              |      |       |      |      |   |   | 3 | KQIFGQNFIPPKK                           | 1 |
|                                                                                                                                                                                                                                                                              |      |       |      |      |   |   | 2 | LYKVYTFNSVRK                            | 1 |
|                                                                                                                                                                                                                                                                              |      |       |      |      |   |   | 2 | IDESSLTGESDQVRK                         | 1 |
|                                                                                                                                                                                                                                                                              |      |       |      |      |   |   | 3 | TEC[339]GLLGFVLDLQDYEPVR                | 1 |
| AT2B3_HUMAN (Q16720) Plasma membrane calcium-transporting ATPase 3 (EC 3.6.3.8) (PMCA3) (Plasma membrane calcium pump isoform 3) (Plasma membrane calcium ATPase isoform 3) [MASS=134258]                                                                                    | 0.00 | 1.15  | *    | *    | * | 1 | 3 | M[147]GDM[147]ANSSIEFHPK                | 1 |
| AT2B4_HUMAN (P23634) Plasma membrane calcium-transporting ATPase 4 (EC 3.6.3.8) (PMCA4) (Plasma membrane calcium pump isoform 4) (Plasma membrane calcium ATPase isoform 4) [MASS=137919]                                                                                    | 1.00 | 1.53  | 0.64 | 0.00 | 1 | 1 | 2 | DALTQINVHYGGVQNLK[330]SR                | 1 |
| AT8A1_HUMAN (Q9Y2Q0) Probable phospholipid-transporting ATPase IA (EC 3.6.3.1) (Chromaffin granule ATPase II) (ATPase class I type 8A member 1) [MASS=131368]                                                                                                                | *    | 5.93  | *    | *    | * | 3 | 3 | TAFKTLVDEVQELEAKSQDPGAVVLGK             | 1 |
|                                                                                                                                                                                                                                                                              |      |       |      |      |   |   | 3 | WC[330]IGLYNVVM[147]FTAM[147]PPLTLGIFER | 1 |
|                                                                                                                                                                                                                                                                              |      |       |      |      |   |   | 2 | YALTFGVRQYFLDLALSC[339]JK               | 2 |

|                                                                                                                                                                                                                          |      |       |      |      |   |   |   |                                          |   |
|--------------------------------------------------------------------------------------------------------------------------------------------------------------------------------------------------------------------------|------|-------|------|------|---|---|---|------------------------------------------|---|
| ATAD2_HUMAN (Q6PL18) ATPase family AAA domain-containing protein 2 [MASS=158553]                                                                                                                                         | 0.00 | 4.75  | 0.77 | 0.00 | 1 | 4 | 2 | EVETYHR                                  | 1 |
|                                                                                                                                                                                                                          |      |       |      |      |   |   | 2 | KSNWYLGTIKK                              | 1 |
|                                                                                                                                                                                                                          |      |       |      |      |   |   | 3 | TSLIQKMEQEVENFSC[330]SR                  | 1 |
|                                                                                                                                                                                                                          |      |       |      |      |   |   | 3 | DKIAC[339]NGDASSSQIIHISDENEGKEMC[339]VLR | 1 |
| ATF2_HUMAN (P15336) Cyclic AMP-dependent transcription factor ATF-2 (Activating transcription factor 2) (cAMP response element-binding protein CRE-BP1) (HB16) [MASS=52276]                                              | 0.00 | 4.11  | 1.00 | 0.00 | 1 | 1 | 2 | NC[339]EEVGLFNLASPFENEFK                 | 1 |
| ATG4B_HUMAN (Q9Y4P1) Cysteine protease ATG4B (EC 3.4.22.-) (Autophagy-related protein 4 homolog B) (hAPG4B) (Autophagin-1) (Autophagy-related cysteine endopeptidase 1) (AUT-like 1 cysteine endopeptidase) [MASS=44309] | *    | 3.82  | *    | *    | * | 1 | 3 | HC[339]FM[147]M[147]PQSLGVIGGK           | 1 |
| ATG7_HUMAN (O95352) Autophagy-related protein 7 (APG7-like) (Ubiquitin-activating enzyme E1-like protein) (hAGP7) [MASS=77959]                                                                                           | *    | 3.27  | *    | *    | * | 1 | 3 | M[147]VNLSEC[339]M[147]DPKRLAESSVDLNLK   | 1 |
| ATM_HUMAN (Q13315) Serine-protein kinase ATM (EC 2.7.11.1) (Ataxia telangiectasia mutated) (A-T, mutated) [MASS=350642]                                                                                                  | *    | 4.22  | *    | *    | * | 6 | 2 | EC[339]IKDILTKHLVELSILAR                 | 1 |
|                                                                                                                                                                                                                          |      |       |      |      |   |   | 3 | HSQLLKDSDFSQEPIMALRTVILEILMEK            | 1 |
|                                                                                                                                                                                                                          |      |       |      |      |   |   | 3 | LC[330]SLWLENSGVSEVNGMM[147]K            | 1 |
|                                                                                                                                                                                                                          |      |       |      |      |   |   | 3 | EVEGTSYHESLYNALQSLR                      | 1 |
|                                                                                                                                                                                                                          |      |       |      |      |   |   | 3 | IRVC[330]ELGDEILPTLLYIWTQHR              | 1 |
|                                                                                                                                                                                                                          |      |       |      |      |   |   | 2 | DGM[147]KIPTYKFLPLMYQLAAR                | 1 |
| ATN1_HUMAN (P54259) Atrophin-1 (Dentatorubral-pallidoluyasian atrophy protein) [MASS=124773]                                                                                                                             | 0.00 | 3.88  | *    | *    | * | 3 | 2 | YTQPSLPSQAVWSQGPPPPPPYGR                 | 1 |
|                                                                                                                                                                                                                          |      |       |      |      |   |   | 3 | VEEASTPKVVKQGR                           | 2 |
|                                                                                                                                                                                                                          |      |       |      |      |   |   | 2 | VRREAQR                                  | 1 |
| ATP5S_HUMAN (Q99766) ATP synthase subunit s, mitochondrial precursor (ATP synthase coupling factor B) (Mitochondrial ATP synthase regulatory component factor B) [MASS=24882]                                            | 0.00 | 5.12  | 1.22 | 0.00 | 1 | 1 | 2 | C[330]HYIEDDC[330]LLR                    | 1 |
| ATP8_HUMAN (P03928) ATP synthase protein 8 (EC 3.6.3.14) (ATPase subunit 8) (A6L) [MASS=7992]                                                                                                                            | 0.59 | 16.18 | 1.51 | 0.00 | 1 | 1 | 2 | IC[339]SLHSLPPQS                         | 1 |
| ATPA_HUMAN (P25705) ATP synthase alpha chain, mitochondrial precursor (EC 3.6.3.14) [MASS=59750]                                                                                                                         | 0.99 | 5.42  | *    | *    | * | 2 | 3 | FENAFLSHVVSQHQALLGTIR                    | 1 |
|                                                                                                                                                                                                                          |      |       |      |      |   |   | 1 | FNDGSDEKK                                | 1 |

|                                                                                                                                                                               |      |      |      |      |   |   |   |                                              |   |
|-------------------------------------------------------------------------------------------------------------------------------------------------------------------------------|------|------|------|------|---|---|---|----------------------------------------------|---|
| ATPG_HUMAN (P36542) ATP synthase gamma chain, mitochondrial precursor (EC 3.6.3.14) [MASS=32996]                                                                              | 1.00 | 8.05 | 1.43 | 0.05 | 5 | 2 | 1 | GLC[339]GAIHSSIAK                            | 1 |
|                                                                                                                                                                               |      |      |      |      |   |   | 1 | GLC[330]GAIHSSIAK                            | 1 |
|                                                                                                                                                                               |      |      |      |      |   |   | 2 | SMKMWAAAKYAR                                 | 1 |
|                                                                                                                                                                               |      |      |      |      |   |   | 2 | GLC[330]GAIHSSIAK                            | 1 |
|                                                                                                                                                                               |      |      |      |      |   |   | 2 | GLC[339]GAIHSSIAK                            | 2 |
| ATRN_HUMAN (O75882) Attractin precursor (Mahogany homolog) (DPPT-L) [MASS=158536]                                                                                             | 0.00 | 4.69 | 0.38 | 0.00 | 1 | 3 | 3 | DKIYM[147]YGGKIDSTGNVTNELR                   | 2 |
|                                                                                                                                                                               |      |      |      |      |   |   | 2 | TAC[339]GDC[330]TSGSSEC[330]MWC[330]SNMK     | 1 |
|                                                                                                                                                                               |      |      |      |      |   |   | 2 | MPSQAPTGNFYQPQLLNSSM[147]C[330]LEDSR         | 1 |
| ATR_HUMAN (Q13535) Serine/threonine-protein kinase ATR (EC 2.7.11.1) (Ataxia telangiectasia and Rad3-related protein) (FRAP-related protein 1) [MASS=301365]                  | 0.00 | 4.20 | 0.24 | 0.00 | 1 | 5 | 3 | IC[330]HSHDEVFVVLMEIIAK                      | 1 |
|                                                                                                                                                                               |      |      |      |      |   |   | 3 | LYAAM[147]HEPDGVAGVSAIRKAEPSLK               | 1 |
|                                                                                                                                                                               |      |      |      |      |   |   | 2 | GETFEVPEIVPFRLLTHNM[147]VNGMGPMGTEGLFR       | 1 |
|                                                                                                                                                                               |      |      |      |      |   |   | 1 | ISLKGSDGK                                    | 2 |
|                                                                                                                                                                               |      |      |      |      |   |   | 3 | LTHNM[147]VNGMGPM[147]GTEGLFRRAC[330]EVTMR   | 1 |
| ATTS10_HUMAN (Q9H324) ADAMTS-10 precursor (EC 3.4.24.-) (A disintegrin and metalloproteinase with thrombospondin motifs 10) (ADAM-TS 10) (ADAM-TS10) (Fragment) [MASS=118072] | *    | 1.58 | *    | *    | * | 1 | 2 | VASPSTHFLNLTRSSR                             | 1 |
| ATTS16_HUMAN (Q8TE57) ADAMTS-16 precursor (EC 3.4.24.-) (A disintegrin and metalloproteinase with thrombospondin motifs 16) (ADAM-TS 16) (ADAM-TS16) [MASS=136187]            | *    | 5.64 | *    | *    | * | 4 | 2 | PLPSHLSWK                                    | 1 |
|                                                                                                                                                                               |      |      |      |      |   |   | 3 | FLSTAQAIC[339]LADQPKPVKEYK                   | 1 |
|                                                                                                                                                                               |      |      |      |      |   |   | 3 | KC[330]ETKFMPPAAEGTIC[330]GHDMWC[339]R       | 1 |
|                                                                                                                                                                               |      |      |      |      |   |   | 3 | DSVDFRAAQC[339]AEHNSRR                       | 1 |
|                                                                                                                                                                               |      |      |      |      |   |   | 3 |                                              |   |
| ATTS17_HUMAN (Q8TE56) ADAMTS-17 precursor (EC 3.4.24.-) (A disintegrin and metalloproteinase with thrombospondin motifs 17) (ADAM-TS 17) (ADAM-TS17) [MASS=121099]            | *    | 8.13 | *    | *    | * | 4 | 2 | TC[339]HLVKGDFSHAR                           | 1 |
|                                                                                                                                                                               |      |      |      |      |   |   | 3 | IGC[339]DGIIIGSAAKEDRC[330]GVC[330]SGDGK     | 1 |
|                                                                                                                                                                               |      |      |      |      |   |   | 3 | TPIPEHVDGDWSPWGAWSM[147]C[330]SRTC[330]GTGAR | 1 |
|                                                                                                                                                                               |      |      |      |      |   |   | 3 | NMEHLMC[330]AGLWC[330]LVEGDTSC[339]KTK       | 1 |
|                                                                                                                                                                               |      |      |      |      |   |   | 3 |                                              |   |
| ATTS18_HUMAN (Q8TE60) ADAMTS-18 precursor (EC 3.4.24.-) (A disintegrin and metalloproteinase with thrombospondin motifs 18) (ADAM-TS 18) (ADAM-TS18) [MASS=135140]            | *    | 2.70 | *    | *    | * | 2 | 2 | RSAGKSQK                                     | 1 |
|                                                                                                                                                                               |      |      |      |      |   |   | 3 | VGHRC[339]ETKFMPPAAEGTVC[330]GLSMWC[330]R    | 1 |
|                                                                                                                                                                               |      |      |      |      |   |   | 3 |                                              |   |
| ATTS20_HUMAN (P59510) ADAMTS-20 precursor (EC 3.4.24.-) (A disintegrin and metalloproteinase with thrombospondin motifs 20) (ADAM-TS 20) (ADAM-TS20) [MASS=214655]            | 0.00 | 2.41 | 1.19 | 0.00 | 1 | 3 | 2 | C[339]PQQQFSINLSGTGMK                        | 1 |
|                                                                                                                                                                               |      |      |      |      |   |   | 3 | PPTQELC[330]HGNC[339]VFTR                    | 1 |
|                                                                                                                                                                               |      |      |      |      |   |   | 2 | GTQARYVSC[330]RDALDR                         | 1 |

|                                                                                                                                                                                                                                                                             |      |       |      |      |   |   |   |                                                                                            |                  |
|-----------------------------------------------------------------------------------------------------------------------------------------------------------------------------------------------------------------------------------------------------------------------------|------|-------|------|------|---|---|---|--------------------------------------------------------------------------------------------|------------------|
| ATS8_HUMAN (Q9UP79) ADAMTS-8 precursor (EC 3.4.24.-) (A disintegrin and metalloproteinase with thrombospondin motifs 8) (ADAM-TS 8) (ADAM-TS8) (METH-2) (METH-8) [MASS=96671]                                                                                               | 0.00 | 5.39  | 1.13 | 0.00 | 1 | 2 | 3 | NGSLPWADGTPC[339]GPGHLC[330]SEGSC[330]LPEEEVER<br>VIDGTLC[330]GPETLAIC[330]VR              | 1<br>1           |
| ATS9_HUMAN (Q9P2N4) ADAMTS-9 precursor (EC 3.4.24.-) (A disintegrin and metalloproteinase with thrombospondin motifs 9) (ADAM-TS 9) (ADAM-TS9) [MASS=216556]                                                                                                                | 0.00 | 3.20  | 1.47 | 0.00 | 1 | 3 | 3 | SPQHVM[147]APTLNFYTNPMMWSK<br>QC[339]ELIFGPGSQVC[339]PYMMQC[339]R<br>IEQELLLQVLSVGKLYNPVDR | 1<br>1<br>1      |
| AUMH_HUMAN (Q13825) Methylglutaconyl-CoA hydratase, mitochondrial precursor (EC 4.2.1.18) (AU-specific RNA-binding enoyl-CoA hydratase) (AU-binding protein/enoyl-CoA hydratase) [MASS=35608]                                                                               | *    | 9.14  | *    | *    | * | 2 | 2 | AVDALKSDKK<br>MAAAVAAPGALGSLHAGGAR                                                         | 1<br>3           |
| AZI1_HUMAN (Q9UPN4) 5-azacytidine-induced protein 1 (Pre-acrosome localization protein 1) (Centrosomal protein of 131 kDa) (Cep131 protein) [MASS=122060]                                                                                                                   | *    | 5.82  | *    | *    | * | 4 | 2 | KRPASLSTAPSEK<br>EC[339]TVALAPNFTANNR<br>GPPENPRETRVPGM[147]R<br>PTEPTDFLM[147]LFEGSPSGKKR | 1<br>1<br>1<br>1 |
| B3A4_HUMAN (Q96Q91) Anion exchange protein 4 (Anion exchanger 4) (Solute carrier family 4 member 9) (Sodium bicarbonate cotransporter 5) [MASS=108247]                                                                                                                      | *    | 0.92  | *    | *    | * | 1 | 2 | VESLSPELR                                                                                  | 1                |
| B3GN3_HUMAN (Q9Y2A9) UDP-GlcNAc:betaGal beta-1,3-N-acetylglucosaminyltransferase 3 (EC 2.4.1.-) (Beta3Gn-T3) (BGnT-3) (Core 1 extending beta-1,3-N-acetylglucosaminyltransferase) (Core1-beta3GlcNAcT) (Beta-1,3-galactosyltransferase 8) (Beta-1,3-GalTase 8) [MASS=42515] | 0.00 | 10.22 | 0.71 | 0.00 | 1 | 2 | 3 | HFPLLQDVPPSKC[330]AQPVFLLLVIKSSPSNYVR<br>YLRHRR                                            | 1<br>1           |
| BAP29_HUMAN (Q9UHQ4) B-cell receptor-associated protein 29 (BCR-associated protein Bap29) [MASS=28320]                                                                                                                                                                      | 0.00 | 4.98  | 1.23 | 0.00 | 1 | 1 | 2 | DEEC[339]VLEAENKK                                                                          | 1                |
| BARD1_HUMAN (Q99728) BRCA1-associated RING domain protein 1 (BARD-1) [MASS=86619]                                                                                                                                                                                           | *    | 2.45  | *    | *    | * | 1 | 2 | QVM[147]SSPSAM[147]KLLPNMAVKR                                                              | 1                |

|                                                                                                                                                                                      |      |       |      |      |   |   |   |                                                |   |
|--------------------------------------------------------------------------------------------------------------------------------------------------------------------------------------|------|-------|------|------|---|---|---|------------------------------------------------|---|
| BAT5_HUMAN (O95870) Protein BAT5 (HLA-B-associated transcript 5) (Protein G5) [MASS=63112]                                                                                           | 0.00 | 3.23  | 1.62 | 0.00 | 1 | 1 | 2 | KLPC[339]QITSYLVHAHTLGRR                       | 1 |
| BBX_HUMAN (Q8WY36) HMG box transcription factor BBX (Bobby sox homolog) (HMG box-containing protein 2) [MASS=105129]                                                                 | 0.00 | 2.76  | 0.31 | 0.00 | 1 | 2 | 3 | GQRSTPLTHDGQPK                                 | 1 |
|                                                                                                                                                                                      |      |       |      |      |   |   | 2 | RPMNAFLLC[330]KR                               | 1 |
| BC11B_HUMAN (Q9C0K0) B-cell lymphoma/leukemia 11B (B-cell CLL/lymphoma 11B) (Radiation-induced tumor suppressor gene 1 protein) (hRit1) (COUP-TF-interacting protein 2) [MASS=95519] | *    | 3.36  | *    | *    | * | 2 | 2 | VMRLNPM[147]AIDSPAMDFSR                        | 1 |
|                                                                                                                                                                                      |      |       |      |      |   |   | 1 | THM[147]HKAGSLAGR                              | 1 |
| BCAR3_HUMAN (O75815) Breast cancer anti-estrogen resistance protein 3 (SH2 domain-containing protein 3B) (Novel SH2-containing protein 2) [MASS=92565]                               | 0.00 | 11.27 | 5.94 | 0.00 | 1 | 5 | 2 | VIAQHVLSM[147]DC[339]RVARILGVSEEMR             | 1 |
|                                                                                                                                                                                      |      |       |      |      |   |   | 3 | FMAEAADSYRM[147]NAERILAGFQPDEEM[147]NEIC[339]K | 1 |
|                                                                                                                                                                                      |      |       |      |      |   |   | 2 | VIAQHVLSMDC[339]RVAR                           | 1 |
|                                                                                                                                                                                      |      |       |      |      |   |   | 2 | ELEEELLSSEDLR                                  | 1 |
|                                                                                                                                                                                      |      |       |      |      |   |   | 2 | IIQVAVELK                                      | 1 |
| BCDO1_HUMAN (Q9HAY6) Beta,beta-carotene 15,15'-monooxygenase (EC 1.14.99.36) (Beta-carotene dioxygenase 1) [MASS=62637]                                                              | 0.00 | 1.83  | 1.36 | 0.00 | 1 | 1 | 2 | ASDC[339]HGAPLT                                | 1 |
| BCL6B_HUMAN (Q8N143) B-cell CLL/lymphoma 6 member B protein (Bcl6-associated zinc finger protein) (Zinc finger protein 62) [MASS=51618]                                              | *    | 6.67  | *    | *    | * | 1 | 3 | AGVGVVLSLPGGPEARGFAPLLDFM[147]YTSRLR           | 1 |
| BCN1_HUMAN (Q14457) Beclin-1 (Coiled-coil myosin-like BCL2-interacting protein) (Protein GT197) [MASS=51896]                                                                         | *    | 6.22  | *    | *    | * | 1 | 2 | MMSTESANSFTLIGEASDGGTMENLSRR                   | 1 |
| BCOR_HUMAN (Q6W2J9) BCoR protein (BCL-6 corepressor) [MASS=192187]                                                                                                                   | *    | 5.19  | *    | *    | * | 4 | 3 | PLDLSSKVVDVDASKADHM[147]K                      | 1 |
|                                                                                                                                                                                      |      |       |      |      |   |   | 3 | LGYEELVLYC[330]LENKIC[339]DVNHR                | 1 |
|                                                                                                                                                                                      |      |       |      |      |   |   | 3 | MGGTDAVITNVSGSVSSAGRPASASPAPANADGKTISR         | 1 |
|                                                                                                                                                                                      |      |       |      |      |   |   | 2 | AMM[147]RFSELEMK                               | 1 |
| BDH_HUMAN (Q02338) D-beta-hydroxybutyrate dehydrogenase, mitochondrial precursor (EC 1.1.1.30) (BDH) (3-hydroxybutyrate dehydrogenase) [MASS=38157]                                  | 0.21 | 12.24 | 0.54 | 0.33 | 2 | 2 | 2 | FGVEAFSDC[330]LR                               | 1 |
|                                                                                                                                                                                      |      |       |      |      |   |   | 3 | M[147]ETYC[330]SSGSTDTSPVIDAVTHALTATTPYTR      | 1 |

|                                                                                                                                                                                                                                                                             |      |       |      |      |   |   |   |                                                |             |
|-----------------------------------------------------------------------------------------------------------------------------------------------------------------------------------------------------------------------------------------------------------------------------|------|-------|------|------|---|---|---|------------------------------------------------|-------------|
| BGAT_HUMAN (P16442) Histo-blood group ABO system transferase (NAGAT) [Includes: Glycoprotein-fucosylgalactoside alpha-N-acetylgalactosaminyltransferase (EC 2.4.1.40) (Fucosylglycoprotein alpha-N-acetylgalactosaminyltransferase) (Histo-blood group A trans [MASS=40934] | 0.00 | 9.04  | 1.83 | 0.00 | 1 | 2 | 3 | M[147]EMISDFC[339]ER<br>PMILFLIMLVLVLFYGYVLSPR | 1<br>2      |
| BIG1_HUMAN (Q9Y6D6) Brefeldin A-inhibited guanine nucleotide-exchange protein 1 (Brefeldin A-inhibited GEP 1) (p200 ARF-GEP1) (p200 ARF guanine nucleotide exchange factor) [MASS=208708]                                                                                   | *    | 2.06  | *    | *    | * | 3 | 2 | AGSSTLPPVKSK<br>PSEQEMSEIKHPETINR<br>PRYISGTVR | 1<br>1<br>1 |
| BIG2_HUMAN (Q9Y6D5) Brefeldin A-inhibited guanine nucleotide-exchange protein 2 (Brefeldin A-inhibited GEP 2) [MASS=202092]                                                                                                                                                 | 0.00 | 10.20 | 2.43 | 0.09 | 2 | 9 | 2 | HLDVDLDRQSLSSIDKNPSEK                          | 1           |
|                                                                                                                                                                                                                                                                             |      |       |      |      |   |   | 3 | RAC[339]QVALDEIKAEIEK                          | 1           |
|                                                                                                                                                                                                                                                                             |      |       |      |      |   |   | 2 | EIIHGIELFNKK                                   | 1           |
|                                                                                                                                                                                                                                                                             |      |       |      |      |   |   | 3 | SPTIRDMAIRC[339]IAQMVNSQAANIR                  | 1           |
|                                                                                                                                                                                                                                                                             |      |       |      |      |   |   | 3 | ANFIEADKYFLPFELAC[330]QSKSPR                   | 1           |
|                                                                                                                                                                                                                                                                             |      |       |      |      |   |   | 3 | IVFRIFDNM[147]KLPEQLSEK                        | 1           |
|                                                                                                                                                                                                                                                                             |      |       |      |      |   |   | 2 | LIAYGHITGNAPDSGAPGKR                           | 1           |
|                                                                                                                                                                                                                                                                             |      |       |      |      |   |   | 2 | VLQEYTSDDMNVAPGDR                              | 1           |
|                                                                                                                                                                                                                                                                             |      |       |      |      |   |   | 3 | RC[339]SVTSMESTVSSGTQTTVQDDPEQFEVIK            | 1           |
| BIRC1_HUMAN (Q13075) Baculoviral IAP repeat-containing protein 1 (Neuronal apoptosis inhibitory protein) [MASS=159581]                                                                                                                                                      | 0.00 | 0.86  | 3.19 | 0.00 | 1 | 1 | 2 | RFHPDC[339]GFLLNK                              | 1           |
| BIRC5_HUMAN (O15392) Baculoviral IAP repeat-containing protein 5 (Apoptosis inhibitor survivin) (Apoptosis inhibitor 4) [MASS=16389]                                                                                                                                        | 0.00 | 7.75  | 0.64 | 0.00 | 1 | 1 | 2 | HSSGC[330]AFLSVK                               | 1           |
| BIRC6_HUMAN (Q9NR09) Baculoviral IAP repeat-containing protein 6 (Ubiquitin-conjugating BIR-domain enzyme apollon) [MASS=527606]                                                                                                                                            | *    | 1.51  | *    | *    | * | 4 | 1 | EVIHK                                          | 1           |
|                                                                                                                                                                                                                                                                             |      |       |      |      |   |   | 3 | KASTVHMM[147]LQPILTYM[147]AC[339]GYMGR         | 1           |
|                                                                                                                                                                                                                                                                             |      |       |      |      |   |   | 2 | ENGADIFLYNANR                                  | 1           |
|                                                                                                                                                                                                                                                                             |      |       |      |      |   |   | 3 | DKEIDLELLQDLMEVDIDPLDIDLEKDLPLAAK              | 1           |
| BKLH5_HUMAN (Q96NJ5) BTB and kelch domain-containing protein 5 [MASS=70352]                                                                                                                                                                                                 | 0.00 | 4.19  | 1.12 | 0.00 | 1 | 1 | 2 | AMFSLC[339]MVESGADEVNLHGVTSLGLK                | 1           |
|                                                                                                                                                                                                                                                                             |      |       |      |      |   |   | 3 | AM[147]FSLC[330]M[147]VESGADEVNLHGVTSLGLK      | 1           |
| BPIL3_HUMAN (Q8NFQ5) Bactericidal/permeability-increasing protein-like 3 precursor [MASS=49716]                                                                                                                                                                             | *    | 1.77  | *    | *    | * | 1 | 2 | FLDSTLHK                                       | 1           |



|                                                                                                                                                                                                                                                                              |      |       |      |      |   |   |   |                                      |   |
|------------------------------------------------------------------------------------------------------------------------------------------------------------------------------------------------------------------------------------------------------------------------------|------|-------|------|------|---|---|---|--------------------------------------|---|
| BRAC_HUMAN (O15178) Brachyury protein (T protein) [MASS=47443]                                                                                                                                                                                                               | *    | 4.60  | *    | *    | * | 1 | 3 | GDPTERELRVGLEESELWLR                 | 1 |
| BRCA2_HUMAN (P51587) Breast cancer type 2 susceptibility protein (Fanconi anemia group D1 protein) [MASS=384223]                                                                                                                                                             | 0.00 | 2.55  | 0.79 | 0.00 | 2 | 4 | 2 | LSISNSNNFEVGGPPAFRIASGK              | 1 |
|                                                                                                                                                                                                                                                                              |      |       |      |      |   |   | 3 | C[330]QLILQNNIEM[147]TTGTFVEEITENYKR | 1 |
|                                                                                                                                                                                                                                                                              |      |       |      |      |   |   | 2 | EAASHGFGKTSNGSFKVNSC[330]K           | 1 |
|                                                                                                                                                                                                                                                                              |      |       |      |      |   |   | 2 | ISLKAAVGGQVPSAC[330]SHK              | 1 |
| BRD1_HUMAN (O95696) Bromodomain-containing protein 1 (BR140-like protein) [MASS=119519]                                                                                                                                                                                      | 0.00 | 2.55  | 0.83 | 0.00 | 1 | 1 | 3 | ISIFDPLEIILEDLTAQEM[147]SEC[339]NSNK | 1 |
| BRD9_HUMAN (Q9H8M2) Bromodomain-containing protein 9 (Rhabdomyosarcoma antigen MU-RMS-40.8) [MASS=55664]                                                                                                                                                                     | 0.00 | 4.59  | 0.37 | 0.00 | 1 | 2 | 2 | LMC[330]DNAMTYNRPDTVYYK              | 1 |
|                                                                                                                                                                                                                                                                              |      |       |      |      |   |   | 1 | DRINR                                | 1 |
| BRI3B_HUMAN (Q8WY22) BRI3-binding protein (I3-binding protein) (Cervical cancer 1 proto-oncogene-binding protein KG19) (HCCR-1) [MASS=27835]                                                                                                                                 | 0.00 | 5.58  | 1.45 | 0.00 | 1 | 1 | 2 | VVLFMSMC[339]VYILHK                  | 1 |
| BUB1_HUMAN (O43683) Mitotic checkpoint serine/threonine-protein kinase BUB1 (EC 2.7.11.1) (hBUB1) (BUB1A) [MASS=122374]                                                                                                                                                      | 0.00 | 3.50  | 0.12 | 0.00 | 1 | 2 | 2 | EGC[330]ETHK                         | 1 |
|                                                                                                                                                                                                                                                                              |      |       |      |      |   |   | 2 | EGC[339]ETHKVANTSSFHTTPNTSLGMVQATPSK | 1 |
| C163B_HUMAN (Q9NR16) Scavenger receptor cysteine-rich type 1 protein M160 precursor (CD163 antigen-like 1) (CD163b antigen) [MASS=159263]                                                                                                                                    | 0.00 | 3.03  | 8.78 | 0.00 | 1 | 2 | 3 | ELNC[339]GDAISLSVGDHFGKGNGLTWA EK    | 1 |
|                                                                                                                                                                                                                                                                              |      |       |      |      |   |   | 2 | QLGC[339]GKPMHVFGMTYFK               | 1 |
| C1QBP_HUMAN (Q07021) Complement component 1 Q subcomponent-binding protein, mitochondrial precursor (Glycoprotein gC1qBP) (C1qBP) (GC1q-R protein) (Hyaluronan-binding protein 1) (Mitochondrial matrix protein p32) (p33) [MASS=31362]                                      | 1.00 | 15.96 | 4.06 | 0.10 | 2 | 2 | 3 | ALVLDC[330]HYPEDEVGQEDEAESDIFSIR     | 1 |
|                                                                                                                                                                                                                                                                              |      |       |      |      |   |   | 2 | ALVLDC[339]HYPEDEVGQEDEAESDIFSIR     | 1 |
|                                                                                                                                                                                                                                                                              |      |       |      |      |   |   | 2 | M[147]SGGWELELNGTEAKLVR              | 1 |
| C560_HUMAN (Q99643) Succinate dehydrogenase cytochrome b560 subunit, mitochondrial precursor (Integral membrane protein CII-3) (QPs1) (QPs-1) (Succinate dehydrogenase complex subunit C) (Succinate-ubiquinone oxidoreductase cytochrome B large subunit) (CY [MASS=18610]) | 1.00 | 7.69  | 0.91 | 0.10 | 3 | 1 | 2 | SLC[330]LGPALIHTAK                   | 2 |
|                                                                                                                                                                                                                                                                              |      |       |      |      |   |   | 2 | SLC[339]LGPALIHTAK                   | 1 |
| CABL2_HUMAN (Q9BTV7) CDK5 and ABL1 enzyme substrate 2 (Interactor with CDK3 2) (Ik3-2) [MASS=52235]                                                                                                                                                                          | *    | 3.56  | *    | *    | * | 1 | 2 | C[339]SLEFLEDAVGC[330]APAQR          | 1 |

|                                                                                                                                                                                                                                              |      |      |      |      |   |   |   |                                          |   |
|----------------------------------------------------------------------------------------------------------------------------------------------------------------------------------------------------------------------------------------------|------|------|------|------|---|---|---|------------------------------------------|---|
| CAC1E_HUMAN (Q15878) Voltage-dependent R-type calcium channel subunit alpha-1E (Voltage-gated calcium channel subunit alpha Cav2.3) (Calcium channel, L type, alpha-1 polypeptide, isoform 6) (Brain calcium channel II) (BII) [MASS=261728] | 0.00 | 4.28 | 0.49 | 0.00 | 1 | 5 | 3 | AAC[339]GRIHYTEM[147]YEM[147]LTLMSPLGLGK | 1 |
|                                                                                                                                                                                                                                              |      |      |      |      |   |   | 3 | C[330]NSEERGTQADWESPERR                  | 1 |
|                                                                                                                                                                                                                                              |      |      |      |      |   |   | 3 | YLNIAFTMVFSLEEC[330]VLK                  | 1 |
|                                                                                                                                                                                                                                              |      |      |      |      |   |   | 3 | RSNSSWLEEFM[147]ER                       | 1 |
|                                                                                                                                                                                                                                              |      |      |      |      |   |   | 3 | GGPGPGMM[147]C[330]GAVNNLLSDTEEDDK       | 1 |
| CAC1F_HUMAN (O60840) Voltage-dependent L-type calcium channel subunit alpha-1F (Voltage-gated calcium channel subunit alpha Cav1.4) [MASS=219494]                                                                                            | 0.00 | 4.78 | 0.81 | 0.00 | 1 | 5 | 2 | RLVAMNM[147]PLNSDGTVTFNATLFLVLR          | 1 |
|                                                                                                                                                                                                                                              |      |      |      |      |   |   | 2 | RNQHSKHK                                 | 1 |
|                                                                                                                                                                                                                                              |      |      |      |      |   |   | 1 | GLLGNDAAPSTSSALQAGLR                     | 1 |
|                                                                                                                                                                                                                                              |      |      |      |      |   |   | 2 | AQGEQEYQNC[339]ELDKNQR                   | 1 |
|                                                                                                                                                                                                                                              |      |      |      |      |   |   | 2 | KEKGLLGNDAAPSTSSALQAGLR                  | 1 |
| CAC1G_HUMAN (O43497) Voltage-dependent T-type calcium channel subunit alpha-1G (Voltage-gated calcium channel subunit alpha Cav3.1) (Cav3.1c) (NBR13) [MASS=262470]                                                                          | *    | 0.42 | *    | *    | * | 1 | 2 | NSLGRAPSLK                               | 1 |
|                                                                                                                                                                                                                                              |      |      |      |      |   |   |   |                                          |   |
| CAC2D_HUMAN (P54289) Dihydropyridine-sensitive L-type calcium channel subunits alpha-2/delta precursor [Contains: L-type calcium channel subunit alpha-2; L-type calcium channel subunit delta] [MASS=123183]                                | 1.00 | 3.76 | 0.98 | 0.01 | 3 | 2 | 3 | FTLC[339]PNGYYFAIDPNGYVLLHPNLQPK         | 1 |
|                                                                                                                                                                                                                                              |      |      |      |      |   |   | 3 | FTLC[330]PNGYYFAIDPNGYVLLHPNLQPK         | 1 |
|                                                                                                                                                                                                                                              |      |      |      |      |   |   | 2 | TPNNPSC[330]NADLINR                      | 1 |
| CALX_HUMAN (P27824) Calnexin precursor (Major histocompatibility complex class I antigen-binding protein p88) (p90) (IP90) [MASS=67568]                                                                                                      | *    | 2.03 | *    | *    | * | 1 | 3 | C[330]GEDYKLHFIFR                        | 1 |
|                                                                                                                                                                                                                                              |      |      |      |      |   |   |   |                                          |   |
| CAN9_HUMAN (O14815) Calpain-9 (EC 3.4.22.-) (Digestive tract-specific calpain) (nCL-4) (CG36 protein) [MASS=79096]                                                                                                                           | 0.00 | 5.65 | 1.19 | 0.00 | 1 | 3 | 3 | KLSLISC[339]KNIISLMDTSGNGK               | 1 |
|                                                                                                                                                                                                                                              |      |      |      |      |   |   | 1 | PGEIVK                                   | 1 |
|                                                                                                                                                                                                                                              |      |      |      |      |   |   | 3 | RGSLLGC[330]FIDTR                        | 1 |
| CAPS1_HUMAN (Q9ULU8) Calcium-dependent secretion activator 1 (Calcium-dependent activator protein for secretion 1) (CAPS-1) [MASS=152786]                                                                                                    | *    | 1.33 | *    | *    | * | 1 | 2 | LQLYVFVM[147]RC[330]IAYPFNAK             | 1 |
|                                                                                                                                                                                                                                              |      |      |      |      |   |   |   |                                          |   |
| CAPS2_HUMAN (Q86UW7) Calcium-dependent secretion activator 2 (Calcium-dependent activator protein for secretion 2) (CAPS-2) [MASS=147734]                                                                                                    | *    | 1.16 | *    | *    | * | 2 | 2 | DADRFQK                                  | 1 |
|                                                                                                                                                                                                                                              |      |      |      |      |   |   | 2 | M[147]DKPAHMK                            | 1 |
| CAR10_HUMAN (Q9BWT7) Caspase recruitment domain-containing protein 10 (CARD-containing MAGUK protein 3) (Carma 3) [MASS=115945]                                                                                                              | 0.91 | 3.49 | 0.89 | 0.00 | 1 | 3 | 1 | C[339]LPSSR                              | 1 |
|                                                                                                                                                                                                                                              |      |      |      |      |   |   | 2 | LSILPFPPSAGSILR                          | 1 |
|                                                                                                                                                                                                                                              |      |      |      |      |   |   | 2 | ALNPAKLTPYLRQC[330]R                     | 1 |

|                                                                                                                                                                                                                                                               |      |       |      |      |   |   |                                                                                                                                                                   |                            |   |
|---------------------------------------------------------------------------------------------------------------------------------------------------------------------------------------------------------------------------------------------------------------|------|-------|------|------|---|---|-------------------------------------------------------------------------------------------------------------------------------------------------------------------|----------------------------|---|
| CAR11_HUMAN (Q9BXL7) Caspase recruitment domain-containing protein 11 (CARD-containing MAGUK protein 3) (Carma 1) [MASS=132641]                                                                                                                               | *    | 1.22  | *    | *    | * | 1 | 3                                                                                                                                                                 | GIQLQRAKSPISLK             | 1 |
| CARKL_HUMAN (Q9UHJ6) Carbohydrate kinase-like protein (EC 2.7.1.-) [MASS=51504]                                                                                                                                                                               | *    | 4.18  | *    | *    | * | 1 | 2                                                                                                                                                                 | AAPDDPSGFAVLASC[330]JARAAR | 1 |
| CASC5_HUMAN (Q8NG31) Protein CASC5 (Cancer susceptibility candidate gene 5 protein) (ALL1-fused gene from chromosome 15q14) (AF15q14) (D40/AF15q14 protein) [MASS=265191]                                                                                     | 0.00 | 2.22  | 0.97 | 0.01 | 2 | 3 | 2 SLNIIENSSAPIC[339]ENK<br>3 TIYSGEENMDITKSHTVAIDNQIFK<br>2 AQVESC[330]QLNNR<br>3 TIYSGEENM[147]DITKSHTVAIDNQIFK                                                  | 1<br>1<br>1<br>1           |   |
| CASP9_HUMAN (P55211) Caspase-9 precursor (EC 3.4.22.-) (CASP-9) (ICE-like apoptotic protease 6) (ICE-LAP6) (Apoptotic protease Mch-6) (Apoptotic protease-activating factor 3) (APAF-3) [Contains: Caspase-9 subunit p35; Caspase-9 subunit p10] [MASS=46281] | 0.00 | 6.01  | 0.63 | 0.00 | 1 | 1 | 3 GSQALPLFISC[330]LEDTGQDMLASFLR                                                                                                                                  | 1                          |   |
| CASP_HUMAN (Q13948) Protein CASP [MASS=77455]                                                                                                                                                                                                                 | 0.00 | 10.62 | 1.20 | 0.00 | 1 | 4 | 3 LAWSESMERDC[339]ATFC[330]AK<br>2 ELIARLEQDLSIIQSIQR<br>2 ISNSDLSGRC[330]AELQVR<br>2 PLEVLLLEKNRSLQSENAALR<br>2 ISNSDLSGRC[339]AELQVR<br>3 ISNSDLSGRC[339]AELQVR | 1<br>1<br>1<br>1<br>1<br>1 |   |
| CATL2_HUMAN (O60911) Cathepsin L2 precursor (EC 3.4.22.43) (Cathepsin V) (Cathepsin U) [MASS=37329]                                                                                                                                                           | 0.00 | 8.68  | 0.13 | 0.00 | 1 | 2 | 2 NLDHGVLVVGYGFEGANSNNSK<br>2 QM[147]M[147]GC[330]FR                                                                                                              | 1<br>1                     |   |
| CATS_HUMAN (P25774) Cathepsin S precursor (EC 3.4.22.27) [MASS=37495]                                                                                                                                                                                         | 0.53 | 5.44  | 3.53 | 0.00 | 1 | 1 | 3 GC[339]NGGFM[147]TTAFQYIIDNK                                                                                                                                    | 1                          |   |
| CCD37_HUMAN (Q494V2) Coiled-coil domain-containing protein 37 [MASS=71117]                                                                                                                                                                                    | *    | 4.09  | *    | *    | * | 2 | 2 ILQEEHLQRARAR<br>2 NVEPENMSGYIK                                                                                                                                 | 1<br>1                     |   |
| CCDC4_HUMAN (Q6ZU67) Coiled-coil domain-containing protein 4 [MASS=57856]                                                                                                                                                                                     | 0.00 | 4.15  | 0.84 | 0.00 | 1 | 1 | 3 AAAAASSSSPSC[339]TPATSQGHLLR                                                                                                                                    | 1                          |   |
| CCL5_HUMAN (P13501) Small inducible cytokine A5 precursor (CCL5) (T-cell-specific RANTES protein) (SIS-delta) (T cell-specific protein P228) (TCP228) [Contains: RANTES(3-68); RANTES(4-68)] [MASS=9990]                                                      | 0.00 | 13.19 | 4.49 | 0.00 | 1 | 1 | 3 C[339]SNPAVVVFVTRK                                                                                                                                              | 1                          |   |

|                                                                                                                                                                                                                                                                              |      |       |      |      |   |   |        |                                                                   |        |
|------------------------------------------------------------------------------------------------------------------------------------------------------------------------------------------------------------------------------------------------------------------------------|------|-------|------|------|---|---|--------|-------------------------------------------------------------------|--------|
| CCNG1_HUMAN (P51959) Cyclin-G1 (Cyclin-G) [MASS=34074]                                                                                                                                                                                                                       | 0.00 | 7.46  | 0.86 | 0.00 | 1 | 2 | 2      | LIESAHDNGLRMTARLR<br>AC[339]HC[339]R                              | 1<br>1 |
| CD1D_HUMAN (P15813) T-cell surface glycoprotein CD1d precursor (CD1d antigen) (R3G1) [MASS=37717]                                                                                                                                                                            | 0.00 | 6.87  | 1.01 | 0.00 | 1 | 1 | 2      | ETVQWLLNGTC[339]PQFVSGLLESGK                                      | 1      |
| CD37_HUMAN (P11049) Leukocyte antigen CD37 (Tetraspanin-26) (Tspan-26) [MASS=31703]                                                                                                                                                                                          | 0.00 | 9.96  | 0.60 | 0.00 | 1 | 1 | 3      | C[339]LLGLYFGM[147]LLLLFATQITLGILISTQR                            | 1      |
| CD59_HUMAN (P13987) CD59 glycoprotein precursor (Membrane attack complex inhibition factor) (MACIF) (MAC-inhibitory protein) (MAC-IP) (Protectin) (MEM43 antigen) (Membrane inhibitor of reactive lysis) (MIRL) (20 kDa homologous restriction factor) (HRF-20) [MASS=14177] | 1.00 | 18.75 | 0.56 | 0.06 | 2 | 2 | 2<br>2 | LRENELTYYC[330]C[330]K<br>FEHC[330]NFNDVTTR                       | 1<br>1 |
| CD81_HUMAN (P60033) CD81 antigen (26 kDa cell surface protein TAPA-1) (Target of the antiproliferative antibody 1) (Tetraspanin-28) (Tspan-28) [MASS=25809]                                                                                                                  | 0.98 | 21.61 | 0.71 | 0.00 | 1 | 2 | 2<br>3 | TFHETLDC[339]C[339]GSSTLTALTTSVLK<br>DQIAKDVKQFYDQALQQAVVDDDANNAK | 1<br>1 |
| CD82_HUMAN (P27701) CD82 antigen (Inducible membrane protein R2) (C33 antigen) (IA4) (Metastasis suppressor Kangai 1) (Suppressor of tumorigenicity-6) (Tetraspanin-27) (Tspan-27) [MASS=29625]                                                                              | *    | 5.24  | *    | *    | * | 1 | 3      | LKQEMGGIVTELIR                                                    | 2      |
| CD86_HUMAN (P42081) T-lymphocyte activation antigen CD86 precursor (Activation B7-2 antigen) (CTLA-4 counter-receptor B7.2) (B70) (FUN-1) (BU63) [MASS=37696]                                                                                                                | 0.00 | 4.56  | 2.10 | 0.00 | 1 | 1 | 2      | C[339]GTNTM[147]ERESEQTK                                          | 1      |
| CD9_HUMAN (P21926) CD9 antigen (p24) (Leukocyte antigen MIC3) (Motility-related protein) (MRP-1) (Tetraspanin-29) (Tspan-29) [MASS=25285]                                                                                                                                    | 0.99 | 13.22 | 0.90 | 0.06 | 2 | 2 | 3<br>1 | AIHYALNC[330]C[330]GLAGGVEQFISDIC[330]PK<br>NREMV                 | 2<br>1 |
| CDK5_HUMAN (Q00535) Cell division protein kinase 5 (EC 2.7.11.22) (Tau protein kinase II catalytic subunit) (TPKII catalytic subunit) (Serine/threonine-protein kinase PSSALRE) [MASS=33304]                                                                                 | 0.66 | 9.25  | 2.04 | 0.00 | 1 | 2 | 2<br>2 | LHDVLHSDK<br>ISAEELQHPYFSDFC[339]PP                               | 1<br>1 |

|                                                                                                                                                                                                            |      |      |      |      |   |   |                                                                                                                          |                                    |   |
|------------------------------------------------------------------------------------------------------------------------------------------------------------------------------------------------------------|------|------|------|------|---|---|--------------------------------------------------------------------------------------------------------------------------|------------------------------------|---|
| CDK6_HUMAN (Q00534) Cell division protein kinase 6 (EC 2.7.11.22) (Serine/threonine-protein kinase PLSTIRE) [MASS=36938]                                                                                   | 0.00 | 8.90 | 1.54 | 0.00 | 1 | 1 | 3                                                                                                                        | APEVLLQSSYATPVDLWSVGC[339]IFAEMFRR | 1 |
| CDKL1_HUMAN (Q00532) Cyclin-dependent kinase-like 1 (EC 2.7.11.22) (Serine/threonine-protein kinase KKIALLRE) (Protein kinase p42 KKIALLRE) [MASS=41701]                                                   | 0.00 | 4.48 | 1.01 | 0.00 | 1 | 1 | 2                                                                                                                        | LTC[330]EQLLHHPYFENIR              | 1 |
| CDON_HUMAN (Q4KMG0) Cell adhesion molecule-related/down-regulated by oncogenes precursor [MASS=139233]                                                                                                     | 0.00 | 3.81 | 0.92 | 0.00 | 1 | 3 | 2 ISWLHNGKTLDGNLEHIK<br>3 MQC[330]FNEGGSEFSNVMIC[330]JETKVKR<br>1 VPESNPK                                                | 1<br>1<br>4                        |   |
| CECR2_HUMAN (Q9BXF3) Cat eye syndrome critical region protein 2 [MASS=164214]                                                                                                                              | *    | 2.16 | *    | *    | * | 1 | 3                                                                                                                        | PSGMQMHPVQSQASFPKTPAATSQEEVPPHK    | 1 |
| CELR1_HUMAN (Q9NYQ6) Cadherin EGF LAG seven-pass G-type receptor 1 precursor (Flamingo homolog 2) (hFmi2) [MASS=329484]                                                                                    | 0.00 | 2.49 | 0.39 | 0.00 | 1 | 4 | 2 EPC[339]ENYMKC[330]VSVLR<br>3 DIGNYSC[330]AAQGTQTGSKK<br>3 GC[330]MQGVRMGGTPTNVATLNM[147]NNALKVR<br>3 DANSVITYQLTGGNTR | 1<br>1<br>1<br>1                   |   |
| CELR2_HUMAN (Q9HCU4) Cadherin EGF LAG seven-pass G-type receptor 2 precursor (Epidermal growth factor-like 2) (Multiple epidermal growth factor-like domains 3) (Flamingo 1) [MASS=317450]                 | *    | 0.51 | *    | *    | * | 1 | 3                                                                                                                        | ATDGDAPPNANILYR                    | 1 |
| CELR3_HUMAN (Q9NYQ7) Cadherin EGF LAG seven-pass G-type receptor 3 precursor (Flamingo homolog 1) (hFmi1) (Multiple epidermal growth factor-like domains 2) (Epidermal growth factor-like 1) [MASS=358255] | 0.00 | 1.51 | 0.02 | 0.00 | 1 | 4 | 3 C[339]VPGVC[339]RNGGTC[339]TDAPNGGFR<br>2 FQRPLC[330]R<br>3 HYLRVTAQDHGSPR<br>2 RQSARNSR                               | 1<br>1<br>1<br>1                   |   |
| CENB1_HUMAN (Q15027) Centaurin-beta 1 (Cnt-b1) [MASS=81535]                                                                                                                                                | 0.00 | 7.57 | 0.32 | 0.00 | 1 | 3 | 2 LM[147]C[330]ELGNVIINQIYEAR<br>2 EGPGLVMEGHFKR<br>3 DSEGRDPLTIAMETANADIVTLR                                            | 1<br>1<br>1                        |   |
| CENB2_HUMAN (Q15057) Centaurin-beta 2 (Cnt-b2) [MASS=88028]                                                                                                                                                | *    | 2.57 | *    | *    | * | 1 | 3                                                                                                                        | LM[147]C[330]ELGNDVINRVYEANVEK     | 1 |
| CENB5_HUMAN (Q96P50) Centaurin-beta 5 (Cnt-b5) [MASS=84664]                                                                                                                                                | 0.00 | 4.87 | 3.28 | 0.00 | 1 | 2 | 3 LMC[339]ELGNSAVNQIYEAQC[330]EGAGSR<br>2 C[339]IQEFISLHLEES                                                             | 1<br>1                             |   |

|                                                                                                                                                                                                                                                  |      |      |      |      |   |   |   |                                              |   |
|--------------------------------------------------------------------------------------------------------------------------------------------------------------------------------------------------------------------------------------------------|------|------|------|------|---|---|---|----------------------------------------------|---|
| CEND1_HUMAN (Q8WZ64) Centaurin-delta 1 (Cnt-d1) (Arf-GAP, Rho-GAP, ankyrin repeat and pleckstrin homology domain-containing protein 2) (PARX protein) [MASS=193422]                                                                              | 0.00 | 4.93 | 0.78 | 0.00 | 1 | 3 | 3 | PDVLETM[147]ALLFSGADVMC[330]ATGDPVHSTPYLLAKK | 1 |
|                                                                                                                                                                                                                                                  |      |      |      |      |   |   | 3 | GWFAM[147]DKSSLHFC[330]LQM[147]QEVQGDRMHLR   | 1 |
|                                                                                                                                                                                                                                                  |      |      |      |      |   |   | 3 | ILKQLQIILSKMQDPIYANVHK                       | 1 |
| CEND2_HUMAN (Q96P48) Centaurin-delta 2 (Cnt-d2) (Arf-GAP, Rho-GAP, ankyrin repeat and pleckstrin homology domain-containing protein 1) [MASS=136263]                                                                                             | *    | 3.55 | *    | *    | * | 3 | 2 | HQAM[147]EAMLLYLASRVGDTK                     | 1 |
|                                                                                                                                                                                                                                                  |      |      |      |      |   |   | 2 | GLGAGVSKVR                                   | 1 |
|                                                                                                                                                                                                                                                  |      |      |      |      |   |   | 3 | AQEGWFSLSGSELR                               | 1 |
| CENPF_HUMAN (P49454) CENP-F kinetochore protein (Centromere protein F) (Mitosin) (AH antigen) [MASS=367592]                                                                                                                                      | 0.00 | 3.74 | 0.83 | 0.00 | 1 | 6 | 3 | HEC[330]QNLESEPIR                            | 1 |
|                                                                                                                                                                                                                                                  |      |      |      |      |   |   | 2 | GFADIPTGKTSPYILR                             | 1 |
|                                                                                                                                                                                                                                                  |      |      |      |      |   |   | 3 | EADEYLDKYC[339]SLLISHEKLEK                   | 1 |
|                                                                                                                                                                                                                                                  |      |      |      |      |   |   | 3 | QRSSGIWENGGGPTPATPESFSK                      | 1 |
|                                                                                                                                                                                                                                                  |      |      |      |      |   |   | 3 | EQNLSSQVEC[330]LELEKAQLLQGLDEAK              | 1 |
|                                                                                                                                                                                                                                                  |      |      |      |      |   |   | 3 | NKEIQELEQLLSSERQELDC[330]LR                  | 1 |
| CEP70_HUMAN (Q8NHQ1) Centrosomal protein of 70 kDa (Cep70 protein) (p10-binding protein) [MASS=69751]                                                                                                                                            | *    | 9.21 | *    | *    | * | 3 | 3 | QDENEGIKVEDLLFIVDTM[147]LEEEVENKEK           | 1 |
|                                                                                                                                                                                                                                                  |      |      |      |      |   |   | 3 | EDESQSEEENDYR                                | 1 |
|                                                                                                                                                                                                                                                  |      |      |      |      |   |   | 2 | ANDLEQIMESVKSK                               | 1 |
| CERKL_HUMAN (Q49MI3) Ceramide kinase-like protein [MASS=62622]                                                                                                                                                                                   | *    | 1.79 | *    | *    | * | 1 | 2 | NRVSALEGGR                                   | 2 |
| CF170_HUMAN (Q96NH3) Protein C6orf170 [MASS=143651]                                                                                                                                                                                              | *    | 3.61 | *    | *    | * | 2 | 3 | KLLDEDISIFSGSEM[147]LPVVK                    | 1 |
| CF182_HUMAN (Q8IYX8) Protein C6orf182 [MASS=53648]                                                                                                                                                                                               | *    | 4.57 | *    | *    | * | 2 | 3 | LLETKYKSLVTTAIQQC[330]VQYFEM[147]C[330]K     | 1 |
| CFAB_HUMAN (P00751) Complement factor B precursor (EC 3.4.21.47) (C3/C5 convertase) (Properdin factor B) (Glycine-rich beta glycoprotein) (GBG) (PBF2) [Contains: Complement factor B Ba fragment; Complement factor B Bb fragment] [MASS=85532] | *    | 9.69 | *    | *    | * | 3 | 2 | GEQISKLKK                                    | 1 |
|                                                                                                                                                                                                                                                  |      |      |      |      |   |   | 3 | MRQHRDPHILQK                                 | 1 |
|                                                                                                                                                                                                                                                  |      |      |      |      |   |   | 3 | QLNEINYEDHKLKSGTNTK                          | 1 |
| CFP1_HUMAN (Q8ND76) Cyclin fold protein 1 (Cyclin box protein 1) [MASS=39336]                                                                                                                                                                    | 0.00 | 3.23 | 2.46 | 0.00 | 1 | 1 | 2 | GGSFRLQEGQALEYVC[330]PSGFYPYPVQTR            | 1 |
|                                                                                                                                                                                                                                                  |      |      |      |      |   |   | 3 | EDYLDVYVFGVGPLVNQVNIINALASK                  | 1 |
|                                                                                                                                                                                                                                                  |      |      |      |      |   |   | 2 |                                              |   |
| CH60_HUMAN (P10809) 60 kDa heat shock protein, mitochondrial precursor (Hsp60) (60 kDa chaperonin) (CPN60) (Heat shock protein 60) (HSP-60) (Mitochondrial matrix protein P1) (P60 lymphocyte protein) (HuCHA60) [MASS=61054]                    | 1.00 | 7.16 | 1.39 | 0.09 | 3 | 3 | 2 | C[339]VALAIYHIK                              | 1 |
|                                                                                                                                                                                                                                                  |      |      |      |      |   |   | 3 | C[339]EFQDAYVLLSEK                           | 1 |
|                                                                                                                                                                                                                                                  |      |      |      |      |   |   | 1 | C[339]EFQDAYVLLSEK                           | 1 |
|                                                                                                                                                                                                                                                  |      |      |      |      |   |   | 2 | C[330]EFQDAYVLLSEK                           | 1 |
|                                                                                                                                                                                                                                                  |      |      |      |      |   |   | 2 | DGVTVAKSIDLKDK                               | 1 |

|                                                                                                                                                                                                                                                                             |      |       |      |      |   |   |   |                                                                                                    |             |
|-----------------------------------------------------------------------------------------------------------------------------------------------------------------------------------------------------------------------------------------------------------------------------|------|-------|------|------|---|---|---|----------------------------------------------------------------------------------------------------|-------------|
| CHCH3_HUMAN (Q9NX63) Coiled-coil-helix-coiled-coil-helix domain-containing protein 3 [MASS=26152]                                                                                                                                                                           | 1.00 | 5.73  | 1.48 | 0.00 | 2 | 1 | 2 | YESHPVC[339]ADLQAK<br>YESHPVC[330]ADLQAK                                                           | 1<br>1      |
| CHD1_HUMAN (O14646) Chromodomain-helicase-DNA-binding protein 1 (EC 3.6.1.-) (ATP-dependent helicase CHD1) (CHD-1) [MASS=196517]                                                                                                                                            | *    | 0.82  | *    | *    | * | 1 | 3 | GSTSGFLNIM[147]M[147]ELK                                                                           | 1           |
| CHD3_HUMAN (Q12873) Chromodomain helicase-DNA-binding protein 3 (EC 3.6.1.-) (ATP-dependent helicase CHD3) (CHD-3) (Mi-2 autoantigen 240 kDa protein) (Mi2-alpha) (Zinc-finger helicase) (hZFH) [MASS=226590]                                                               | *    | 0.65  | *    | *    | * | 1 | 2 | YERIDGGITGALR                                                                                      | 1           |
| CHD8_HUMAN (Q9HCK8) Chromodomain-helicase-DNA-binding protein 8 (EC 3.6.1.-) (ATP-dependent helicase CHD8) (CHD-8) (Helicase with SNF2 domain 1) [MASS=262315]                                                                                                              | 0.00 | 1.82  | 5.09 | 0.00 | 1 | 2 | 2 | LSPSSSSSSSSSSSSSTDESEDEK<br>NYSYLHC[339]EWATISQLEK                                                 | 1<br>1      |
| CHIC1_HUMAN (Q5VXU3) Cysteine-rich hydrophobic domain 1 protein (Brain X-linked protein) [MASS=25616]                                                                                                                                                                       | *    | 10.27 | *    | *    | * | 1 | 3 | RYAPDPVLRGAGHITVFGLSNK                                                                             | 1           |
| CHMP3_HUMAN (Q9Y3E7) Charged multivesicular body protein 3 (Chromatin-modifying protein 3) (Vacuolar protein sorting 24) (hVps24) (Neuroendocrine differentiation factor) [MASS=24942]                                                                                      | *    | 6.33  | *    | *    | * | 1 | 3 | PPKELVNEWSLKIR                                                                                     | 1           |
| CHSS1_HUMAN (Q86X52) Chondroitin sulfate synthase 1 (EC 2.4.1.175) (Glucuronosyl-N-acetylgalactosaminyl-proteoglycan 4-beta-N-acetylgalactosaminyltransferase 1) (Chondroitin sulfate synthase 1) (N-acetylgalactosaminyl-proteoglycan 3-beta-glucuronosyltran [MASS=91729] | 0.00 | 8.85  | 1.12 | 0.00 | 1 | 3 | 3 | LALEPGENFC[339]M[147]GGPGVIMSREVL<br>IVYSGKVPSDNHFAFTQKTGFWR<br>FAGVQC[339]VWSYEM[147]QQLFYENYEQNK | 1<br>1<br>1 |
| CHST3_HUMAN (Q7LGC8) Carbohydrate sulfotransferase 3 (EC 2.8.2.17) (Chondroitin 6-sulfotransferase) (Chondroitin 6-O-sulfotransferase 1) (C6ST-1) (C6ST) (Galactose/N-acetylglucosamine/N-acetylglucosamine 6-O-sulfotransferase 0) (GST-0) [MASS=54673]                    | 0.00 | 7.52  | 1.69 | 0.00 | 1 | 2 | 3 | WRFSM[147]PFKLAQVVQAPC[330]GPAMR<br>LAQVVQAPC[339]GPAM[147]R                                       | 1<br>1      |

|                                                                                                                                                                                                                                                                             |      |       |      |      |   |   |                                      |                                                                                                                                                                                                 |                                           |
|-----------------------------------------------------------------------------------------------------------------------------------------------------------------------------------------------------------------------------------------------------------------------------|------|-------|------|------|---|---|--------------------------------------|-------------------------------------------------------------------------------------------------------------------------------------------------------------------------------------------------|-------------------------------------------|
| CHST5_HUMAN (Q9GZS9) Carbohydrate sulfotransferase 5 (EC 2.8.2.-) (N-acetylglucosamine 6-O-sulfotransferase 3) (GlcNAc6ST-3) (Intestinal GlcNAc-6-sulfotransferase) (Intestinal N-acetylglucosamine-6-O-sulfotransferase) (I-GlcNAc6ST) (hIGn6ST) (Galactose/N [MASS=43832] | *    | 2.56  | *    | *    | * | 1 | 3                                    | QDVC[339]KTLC[330]TR                                                                                                                                                                            | 1                                         |
| CHSTE_HUMAN (Q8NCH0) Carbohydrate sulfotransferase D4ST1 (EC 2.8.2.-) (Dermatan 4-sulfotransferase 1) (D4ST-1) (hD4ST) [MASS=42997]                                                                                                                                         | 0.00 | 2.66  | 1.64 | 0.00 | 1 | 1 | 2                                    | AVC[339]GQPGM[147]PR                                                                                                                                                                            | 1                                         |
| CI032_HUMAN (Q9BV86) Protein C9orf32 [MASS=25256]                                                                                                                                                                                                                           | *    | 12.61 | *    | *    | * | 2 | 2                                    | EGPNKTGTSC[339]ALDC[339]GAGIGR<br>RLLLPLFR                                                                                                                                                      | 1<br>1                                    |
| CI038_HUMAN (Q9UI66) Protein C9orf38 [MASS=13396]                                                                                                                                                                                                                           | 0.00 | 13.56 | 0.48 | 0.00 | 1 | 1 | 2                                    | HNYKATC[330]LMRFLPLQR                                                                                                                                                                           | 1                                         |
| CI043_HUMAN (Q8TAL5) Protein C9orf43 [MASS=52221]                                                                                                                                                                                                                           | 0.23 | 3.47  | 1.89 | 0.00 | 1 | 1 | 2                                    | QTM[147]LC[339]PEMKIKLAMMK                                                                                                                                                                      | 1                                         |
| CIC_HUMAN (Q96RK0) Protein capicua homolog [MASS=163789]                                                                                                                                                                                                                    | *    | 1.24  | *    | *    | * | 2 | 3<br>2                               | RPMNAFMIFSKR<br>FAELPEFR                                                                                                                                                                        | 1<br>2                                    |
| CISY_HUMAN (O75390) Citrate synthase, mitochondrial precursor (EC 2.3.3.1) [MASS=51712]                                                                                                                                                                                     | 1.00 | 3.65  | 1.51 | 0.05 | 2 | 2 | 1<br>2<br>2                          | LPC[339]VAAK<br>YTC[339]QREFALK<br>LPC[339]VAAK                                                                                                                                                 | 1<br>1<br>1                               |
| CJ067_HUMAN (Q8IYJ2) Protein C10orf67 [MASS=21463]                                                                                                                                                                                                                          | 0.00 | 32.07 | 0.46 | 0.00 | 1 | 2 | 3<br>3                               | AHYVMSIVIRWVHC[330]FSSSLRGTFGTR<br>GSTRNLNISDDLKIGFFSTDHATQTDSSEILSVK                                                                                                                           | 1<br>1                                    |
| CJ070_HUMAN (Q9NZ45) Protein C10orf70 [MASS=12199]                                                                                                                                                                                                                          | 1.00 | 40.74 | 1.31 | 0.05 | 9 | 4 | 2<br>2<br>3<br>2<br>2<br>1<br>3<br>2 | IVHAFDM[147]EDLGDKAVYC[339]R<br>KFPFC[330]DGAHTK<br>KFPFC[339]DGAHTK<br>AVYC[339]R<br>FPFC[339]DGAHTK<br>KFPFC[339]DGAHTK<br>FPFC[339]DGAHTK<br>IVHAFDM[147]EDLGDKAVYC[339]R<br>FPFC[330]DGAHTK | 1<br>1<br>1<br>1<br>1<br>1<br>1<br>1<br>1 |
| CJ084_HUMAN (Q9H8W3) Protein C10orf84 [MASS=27021]                                                                                                                                                                                                                          | 0.00 | 10.30 | 0.81 | 0.00 | 1 | 1 | 3                                    | TETESNVNAYEEC[339]PSGIPIDM[147]WNK                                                                                                                                                              | 1                                         |
| CJ093_HUMAN (Q5SR76) Protein C10orf93 [MASS=46712]                                                                                                                                                                                                                          | 0.00 | 11.36 | 4.70 | 0.00 | 1 | 3 | 3<br>1<br>2                          | KMESKVSGFM[147]TLLPGDEALLTVQLDK<br>SHVPQK<br>QPEVSEDC[339]IQM[147]YFK                                                                                                                           | 1<br>1<br>1                               |



|                                                                                                                                                                           |      |       |       |      |   |   |   |                                               |   |
|---------------------------------------------------------------------------------------------------------------------------------------------------------------------------|------|-------|-------|------|---|---|---|-----------------------------------------------|---|
| CK5P2_HUMAN (Q96SN8) CDK5 regulatory subunit-associated protein 2 (CDK5 activator-binding protein C48) (Centrosome-associated protein 215) [MASS=215036]                  | *    | 4.38  | *     | *    | * | 5 | 3 | PDLLKVVRELLGQLFLTEQEVSGEHLDGK                 | 1 |
|                                                                                                                                                                           |      |       |       |      |   |   | 2 | QHMNTM[147]IK                                 | 1 |
|                                                                                                                                                                           |      |       |       |      |   |   | 2 | PHDELKLSLC[330]EAQLVK                         | 1 |
|                                                                                                                                                                           |      |       |       |      |   |   | 2 | VSDLIQLVKELYTDNQHLKK                          | 1 |
|                                                                                                                                                                           |      |       |       |      |   |   | 2 | LHKKLFEQEK                                    | 2 |
| CLC10_HUMAN (Q8IUN9) C-type lectin domain family 10 member A (C-type lectin superfamily member 14) (Macrophage lectin 2) (CD301 antigen) [MASS=35446]                     | 0.00 | 18.04 | 2.67  | 0.00 | 1 | 2 | 3 | LC[330]SGPC[330]HLLLSLGLLLLLVIIC[330]VVGFGNSK | 1 |
|                                                                                                                                                                           |      |       |       |      |   |   | 3 | WNDDVC[339]QRPHYWVVC[339]EAGLGQTSQESH         | 1 |
| CLC14_HUMAN (Q86T13) C-type lectin domain family 14 member A precursor (Epidermal growth factor receptor 5) (EGFR-5) [MASS=51635]                                         | 0.00 | 6.73  | 10.17 | 0.00 | 1 | 1 | 2 | SC[339]VTSGEGQPTLGGTGVPTRRPPATATSPVPQR        | 1 |
|                                                                                                                                                                           |      |       |       |      |   |   | 3 | IHEGC[330]EEPATHNALAK                         | 2 |
| CLH1_HUMAN (Q00610) Clathrin heavy chain 1 (CLH-17) [MASS=191482]                                                                                                         | 1.00 | 1.91  | 0.76  | 0.25 | 3 | 2 | 3 | IHEGC[339]EEPATHNALAK                         | 1 |
|                                                                                                                                                                           |      |       |       |      |   |   | 1 | HNIMDFAMPYFIQVMK                              | 1 |
| CLH2_HUMAN (P53675) Clathrin heavy chain 2 (CLH-22) [MASS=187029]                                                                                                         | *    | 1.40  | *     | *    | * | 2 | 1 | HLIM[147]AVR                                  | 1 |
|                                                                                                                                                                           |      |       |       |      |   |   | 3 | KDHLKDYK[147]QHAAESR                          | 1 |
| CLIC2_HUMAN (O15247) Chloride intracellular channel protein 2 (XAP121) [MASS=28356]                                                                                       | 0.00 | 4.86  | 6.96  | 0.00 | 1 | 1 | 3 | ESFDVGC[339]NLFAK                             | 1 |
| CLN8_HUMAN (Q9UBY8) Protein CLN8 [MASS=32815]                                                                                                                             | 0.00 | 10.49 | 0.19  | 0.00 | 1 | 1 | 3 | STLMVAGVFVYLGVFVVC[330]HQLSSSLNATYR           | 1 |
|                                                                                                                                                                           |      |       |       |      |   |   | 3 | NSSEEKEAM[147]NSIC[339]QTALSADGK              | 1 |
| CM007_HUMAN (Q5W0B1) Protein C13orf7 [MASS=81116]                                                                                                                         | *    | 11.29 | *     | *    | * | 4 | 2 | KIQSSLSSASPSKATK                              | 1 |
|                                                                                                                                                                           |      |       |       |      |   |   | 2 | TRTSSEASMDAAYLDK                              | 1 |
|                                                                                                                                                                           |      |       |       |      |   |   | 3 | VPITPENPC[339]KEIIGGTSESEPMLSHTVR             | 1 |
| CMC1_HUMAN (O75746) Calcium-binding mitochondrial carrier protein Aralar1 (Mitochondrial aspartate glutamate carrier 1) (Solute carrier family 25 member 12) [MASS=74755] | 1.00 | 4.57  | 1.24  | 0.00 | 2 | 2 | 2 | AGQTTYSGVIDC[330]FRK                          | 2 |
|                                                                                                                                                                           |      |       |       |      |   |   | 2 | AGQTTYSGVIDC[339]FRK                          | 1 |
|                                                                                                                                                                           |      |       |       |      |   |   | 2 | DIPFSAIFPVYAH[330]K                           | 1 |
| CN050_HUMAN (Q96LQ0) Protein C14orf50 [MASS=49440]                                                                                                                        | *    | 9.48  | *     | *    | * | 3 | 2 | KRMTFVQFR                                     | 1 |
|                                                                                                                                                                           |      |       |       |      |   |   | 3 | IC[330]SFTTFM[147]RNK                         | 1 |
|                                                                                                                                                                           |      |       |       |      |   |   | 3 | IQDTLDLVMKTLSSHTSC[339]PK                     | 1 |
| CN129_HUMAN (Q9P0R6) UPF0279 protein C14orf129 [MASS=15648]                                                                                                               | 0.00 | 12.23 | 0.50  | 0.00 | 1 | 1 | 3 | C[330]ADVAYINVETKERNR                         | 1 |

|                                                                                                                                |      |       |       |      |    |   |  |   |                                           |   |
|--------------------------------------------------------------------------------------------------------------------------------|------|-------|-------|------|----|---|--|---|-------------------------------------------|---|
|                                                                                                                                |      |       |       |      |    |   |  | 2 | RPPGVLHC[339]TTK                          | 2 |
|                                                                                                                                |      |       |       |      |    |   |  | 3 | AHITLGC[339]AADVEAVQTGLDLLEILR            | 4 |
|                                                                                                                                |      |       |       |      |    |   |  | 2 | AHITLGC[330]AADVEAVQTGLDLLEILR            | 1 |
|                                                                                                                                |      |       |       |      |    |   |  | 3 | DKPELQFPFLQDEDTVATLLEC[339]K              | 1 |
|                                                                                                                                |      |       |       |      |    |   |  | 3 | LDC[339]AQLKEK                            | 1 |
|                                                                                                                                |      |       |       |      |    |   |  | 2 | DKPELQFPFLQDEDTVATLLEC[339]K              | 1 |
|                                                                                                                                |      |       |       |      |    |   |  | 2 | RPPGVLHC[330]TTK                          | 2 |
| CN37_HUMAN (P09543) 2',3'-cyclic-nucleotide 3'-phosphodiesterase (EC 3.1.4.37) (CNP) (CNPase) [MASS=47578]                     | 1.00 | 22.57 | 1.12  | 0.12 | 20 | 7 |  | 2 | DKPELQFPFLQDEDTVATLLEC[330]K              | 1 |
|                                                                                                                                |      |       |       |      |    |   |  | 2 | RLDEDLAAYC[339]R                          | 1 |
|                                                                                                                                |      |       |       |      |    |   |  | 2 | LDEDLAAYC[330]R                           | 1 |
|                                                                                                                                |      |       |       |      |    |   |  | 2 | AHITLGC[339]AADVEAVQTGLDLLEILR            | 2 |
|                                                                                                                                |      |       |       |      |    |   |  | 1 | FC[339]DYGK                               | 1 |
|                                                                                                                                |      |       |       |      |    |   |  | 3 | RPPGVLHC[339]TTK                          | 1 |
|                                                                                                                                |      |       |       |      |    |   |  | 3 | AHITLGC[330]AADVEAVQTGLDLLEILR            | 2 |
| CNTN1_HUMAN (Q12860) Contactin-1 precursor (Neural cell surface protein F3) (Glycoprotein gp135) [MASS=113320]                 | 0.98 | 2.65  | 0.42  | 0.00 | 1  | 2 |  | 2 | VIIEC[330]KPK                             | 1 |
|                                                                                                                                |      |       |       |      |    |   |  | 2 | VLEPM[147]PSTAEISTSGAVLK                  | 1 |
| CNTP1_HUMAN (P78357) Contactin-associated protein 1 precursor (Caspr) (Caspr1) (Neurexin 4) (Neurexin IV) (p190) [MASS=156266] | 0.00 | 3.54  | 0.69  | 0.00 | 1  | 5 |  | 2 | LGLYGC[330]PYK                            | 1 |
|                                                                                                                                |      |       |       |      |    |   |  | 1 | FPRGVSR                                   | 1 |
|                                                                                                                                |      |       |       |      |    |   |  | 2 | IRAVATQGSFNWDWVTR                         | 1 |
|                                                                                                                                |      |       |       |      |    |   |  | 2 | LHGISGWSPR                                | 1 |
|                                                                                                                                |      |       |       |      |    |   |  | 1 | PWVLR                                     | 1 |
| CO6A2_HUMAN (P12110) Collagen alpha-2(VI) chain precursor [MASS=108573]                                                        | 0.00 | 3.04  | 1.98  | 0.00 | 1  | 1 |  | 3 | TDC[339]PIHVYFVLDTSESVTM[147]QSPTDILLFHMK | 1 |
| CO7A1_HUMAN (Q02388) Collagen alpha-1(VII) chain precursor (Long-chain collagen) (LC collagen) [MASS=295217]                   | 0.00 | 2.55  | 0.37  | 0.00 | 1  | 4 |  | 2 | GEMGQPGPSGER                              | 1 |
|                                                                                                                                |      |       |       |      |    |   |  | 2 | LYAADIVFLLDGSSSIGR                        | 1 |
|                                                                                                                                |      |       |       |      |    |   |  | 3 | GEPGPPGPPGRLVDTGPGAREK                    | 1 |
|                                                                                                                                |      |       |       |      |    |   |  | 3 | AVTGSTEAC[330]HPFVYGGC[330]GGNANR         | 1 |
| COE4_HUMAN (Q9BQW3) Transcription factor COE4 (Early B-cell factor 4) (EBF-4) (Olf-1/EBF-like 4) (OE-4) (O/E-4) [MASS=68360]   | 0.00 | 9.01  | 16.74 | 0.00 | 1  | 4 |  | 2 | GC[330]PGRFVYTALNEPTIDYGFQR               | 1 |
|                                                                                                                                |      |       |       |      |    |   |  | 2 | SC[339]SSASPR                             | 1 |
|                                                                                                                                |      |       |       |      |    |   |  | 3 | AAPPKLPTPLQSPRR                           | 1 |
|                                                                                                                                |      |       |       |      |    |   |  | 2 | ARGQAPGSGGR                               | 1 |
| COF1_HUMAN (P23528) Cofilin-1 (Cofilin, non-muscle isoform) (18 kDa phosphoprotein) (p18) [MASS=18371]                         | 1.00 | 4.85  | 0.75  | 0.07 | 3  | 1 |  | 2 | M[147]LPDKDC[330]R                        | 1 |
|                                                                                                                                |      |       |       |      |    |   |  | 2 | M[147]LPDKDC[339]R                        | 1 |
|                                                                                                                                |      |       |       |      |    |   |  | 2 | MLPDKDC[339]R                             | 1 |

|                                                                                                                                                                                            |      |       |      |      |   |   |   |                                     |   |
|--------------------------------------------------------------------------------------------------------------------------------------------------------------------------------------------|------|-------|------|------|---|---|---|-------------------------------------|---|
| COPA_HUMAN (P53621) Coatomer subunit alpha (Alpha-coat protein) (Alpha-COP) (HEPCOP) (HEP-COP) [Contains: Xenin (Xenopsin-related peptide); Proxenin] [MASS=138331]                        | 0.00 | 3.92  | 1.13 | 0.00 | 1 | 3 | 3 | C[339]LFTLLGHLDIYR                  | 1 |
|                                                                                                                                                                                            |      |       |      |      |   |   | 2 | VKGNNVYC[330]LDREC[339]R            | 1 |
|                                                                                                                                                                                            |      |       |      |      |   |   | 3 | GVNWAAFHPTMPLIVSGADDR               | 1 |
| COPG_HUMAN (Q9Y678) Coatomer subunit gamma (Gamma-coat protein) (Gamma-COP) [MASS=97718]                                                                                                   | 0.00 | 2.75  | 0.76 | 0.00 | 1 | 2 | 2 | ALC[330]QITDSTMLQAIER               | 1 |
|                                                                                                                                                                                            |      |       |      |      |   |   | 2 | YIRFIYNR                            | 2 |
| CORO7_HUMAN (P57737) Coronin-7 (70 kDa WD repeat tumor rejection antigen homolog) [MASS=100574]                                                                                            | 0.26 | 3.35  | 1.09 | 0.00 | 1 | 1 | 3 | VAHLGC[339]HSDLVTDLDFSPFDDFLATGSADR | 1 |
| COX5B_HUMAN (P10606) Cytochrome c oxidase polypeptide Vb, mitochondrial precursor (EC 1.9.3.1) [MASS=13696]                                                                                | 1.00 | 4.65  | 1.51 | 0.00 | 2 | 1 | 1 | C[330]GAHYK                         | 1 |
|                                                                                                                                                                                            |      |       |      |      |   |   | 1 | C[339]GAHYK                         | 1 |
| COX7C_HUMAN (P15954) Cytochrome c oxidase polypeptide VIIc, mitochondrial precursor (EC 1.9.3.1) [MASS=7245]                                                                               | 0.94 | 26.98 | 1.03 | 0.00 | 1 | 1 | 2 | M[147]C[339]LYFGSAFATPFLVVR         | 1 |
| CP2D6_HUMAN (P10635) Cytochrome P450 2D6 (EC 1.14.14.1) (CYPIID6) (P450-DB1) (Debrisoquine 4-hydroxylase) [MASS=55769]                                                                     | 0.00 | 11.87 | 1.42 | 0.00 | 1 | 2 | 3 | PFRFHPEHFLDAQGHFVKPEAFLPFSAGR       | 1 |
|                                                                                                                                                                                            |      |       |      |      |   |   | 3 | YPPGPLPLPGLGNLLHVDFQNTPYC[339]FDQLR | 1 |
| CP343_HUMAN (Q9HB55) Cytochrome P450 3A43 (EC 1.14.14.1) [MASS=57669]                                                                                                                      | 0.00 | 5.37  | *    | *    | * | 1 | 3 | LGIPGPTPLPFLGTILFYLRGLWNFDR         | 1 |
| CPLX1_HUMAN (O14810) Complexin-1 (Complexin I) (CPX I) (Synaphin-2) [MASS=15030]                                                                                                           | 0.00 | 17.91 | 0.33 | 0.00 | 1 | 1 | 2 | KAIPPGC[330]GDEVEEEDSILDTVIK        | 1 |
| CPNE3_HUMAN (O75131) Copine-3 (Copine III) [MASS=60130]                                                                                                                                    | *    | 7.45  | *    | *    | * | 2 | 3 | VEC[339]YDYDNDGSHDLIGTFQTTMTKLK     | 1 |
|                                                                                                                                                                                            |      |       |      |      |   |   | 2 | VVLFEM[147]EARKLDNK                 | 1 |
| CPNE6_HUMAN (O95741) Copine-6 (Copine VI) (Neuronal-copine) (N-copine) [MASS=61991]                                                                                                        | 0.00 | 5.92  | 1.74 | 0.02 | 2 | 3 | 2 | DTLTKPHPC[339]VLLK                  | 1 |
|                                                                                                                                                                                            |      |       |      |      |   |   | 2 | SC[339]SSPVFSR                      | 1 |
|                                                                                                                                                                                            |      |       |      |      |   |   | 2 | FLVYDYDSSGK                         | 1 |
| CRSP8_HUMAN (Q6P2C8) CRSP complex subunit 8 (Cofactor required for Sp1 transcriptional activation subunit 8) (Transcriptional coactivator CRSP34) (P37 TRAP/SMCC/PC2 subunit) [MASS=35432] | *    | 2.25  | *    | *    | * | 1 | 1 | SFMTWLR                             | 1 |
| CRTC_HUMAN (P27797) Calreticulin precursor (CRP55) (Calregulin) (HACBP) (ERp60) (grp60) [MASS=48141]                                                                                       | 1.00 | 3.12  | 2.01 | 0.01 | 3 | 1 | 2 | HEQNIDC[339]GGGYVK                  | 2 |
|                                                                                                                                                                                            |      |       |      |      |   |   | 2 | HEQNIDC[330]GGGYVK                  | 1 |
| CRYM_HUMAN (Q14894) Mu-crystallin homolog (NADP-regulated thyroid-hormone-binding protein) [MASS=33775]                                                                                    | 1.00 | 2.87  | 0.60 | 0.14 | 3 | 1 | 2 | GVKPAHC[330]JEK                     | 2 |
|                                                                                                                                                                                            |      |       |      |      |   |   | 2 | GVKPAHC[339]JEK                     | 1 |

|                                                                                                                                                                                           |      |       |      |      |   |   |   |                                             |   |
|-------------------------------------------------------------------------------------------------------------------------------------------------------------------------------------------|------|-------|------|------|---|---|---|---------------------------------------------|---|
| CSDE1_HUMAN (O75534) Cold shock domain-containing protein E1 (UNR protein) (N-ras upstream gene protein) [MASS=88884]                                                                     | 0.00 | 0.75  | 0.35 | 0.00 | 1 | 1 | 2 | VC[330]EGPK                                 | 1 |
| CSK1_HUMAN (Q8WXD9) Caskin-1 (CASK-interacting protein 1) [MASS=149813]                                                                                                                   | *    | 3.35  | *    | *    | * | 2 | 1 | PSSHLPPTPRATTR                              | 1 |
|                                                                                                                                                                                           |      |       |      |      |   |   | 3 | RASDLAGSVDTGSAGSVKSIAAMLELSSIGGGGR          | 1 |
| CSMD1_HUMAN (Q96PZ7) CUB and sushi domain-containing protein 1 precursor (CUB and sushi multiple domains protein 1) [MASS=388867]                                                         | 0.00 | 0.87  | 2.82 | 0.00 | 1 | 3 | 1 | VHYFC[330]JK                                | 1 |
|                                                                                                                                                                                           |      |       |      |      |   |   | 3 | C[339]EDPGIPNYGYR                           | 1 |
|                                                                                                                                                                                           |      |       |      |      |   |   | 3 | SNGQWSSPLPTC[330]R                          | 1 |
| CSPG2_HUMAN (P13611) Versican core protein precursor (Large fibroblast proteoglycan) (Chondroitin sulfate proteoglycan 2) (PG-M) (Glial hyaluronate-binding protein) (GHAP) [MASS=372817] | 1.00 | 2.06  | 0.45 | 0.21 | 4 | 5 | 2 | EETVMMEGSGDAAFR                             | 1 |
|                                                                                                                                                                                           |      |       |      |      |   |   | 2 | FTFEEAAKEC[330]ENQDAR                       | 2 |
| CSPG3_HUMAN (O14594) Neurocan core protein precursor (Chondroitin sulfate proteoglycan 3) [MASS=142972]                                                                                   | 0.00 | 2.80  | 0.63 | 0.00 | 1 | 3 | 2 | C[330]GGPAPGVR                              | 1 |
|                                                                                                                                                                                           |      |       |      |      |   |   | 3 | C[330]GGPAPGVRTVYR                          | 1 |
|                                                                                                                                                                                           |      |       |      |      |   |   | 2 | DRYALTFEAQEAC[339]R                         | 1 |
| CSR2B_HUMAN (Q9H8E8) Cysteine-rich protein 2-binding protein (CSR2P-binding protein) (CRP2BP) (CRP2-binding partner) [MASS=88801]                                                         | 0.00 | 4.48  | 0.38 | 0.00 | 1 | 2 | 2 | AGIATFMIYHLIQTTC[330]M[147]GK               | 1 |
|                                                                                                                                                                                           |      |       |      |      |   |   | 3 | PPTMKPEGEKLSASTLK                           | 1 |
| CT135_HUMAN (Q9H3Z7) Uncharacterized protein C20orf135 [MASS=52554]                                                                                                                       | *    | 8.10  | *    | *    | * | 2 | 3 | HLKNVEATHFSPLEPEEFQLPWR                     | 1 |
|                                                                                                                                                                                           |      |       |      |      |   |   | 3 | MC[339]VIC[339]FVKALVRVFK                   | 1 |
| CTL2_HUMAN (Q8IWA5) Choline transporter-like protein 2 (Solute carrier family 44 member 2) [MASS=80151]                                                                                   | *    | 2.69  | *    | *    | * | 1 | 3 | GVAEVL RDGDC[339]PAVLIPSK                   | 1 |
| CTNB1_HUMAN (P35222) Beta-catenin [MASS=85496]                                                                                                                                            | 0.83 | 3.84  | 0.42 | 0.00 | 1 | 2 | 2 | NLALC[330]PANHAPLR                          | 1 |
|                                                                                                                                                                                           |      |       |      |      |   |   | 3 | LIILASGGPQALVNIMR                           | 1 |
| CU005_HUMAN (Q9Y3R5) Protein C21orf5 [MASS=258222]                                                                                                                                        | 0.00 | 0.57  | 1.00 | 0.00 | 1 | 1 | 2 | NVEFIHLLQRC[330]K                           | 1 |
| CU055_HUMAN (Q9NX36) J domain-containing protein C21orf55 [MASS=45805]                                                                                                                    | 0.00 | 14.95 | 1.62 | 0.00 | 1 | 3 | 3 | EYYRLLNVEEGC[339]SADEV R                    | 1 |
|                                                                                                                                                                                           |      |       |      |      |   |   | 3 | MLPYFGIIRNRM[147]M[147]STHK                 | 1 |
|                                                                                                                                                                                           |      |       |      |      |   |   | 3 | EYYRLLNVEEGC[339]SADEVRESFHK                | 1 |
| CU063_HUMAN (P58658) Protein C21orf63 precursor (SUE21) [MASS=49483]                                                                                                                      | 0.00 | 6.35  | 5.35 | 0.00 | 1 | 1 | 3 | AALLFVSSVC[339]IGLALTLC[339]ALVIRESC[339]AK | 1 |

|                                                                                                                                                                                                                                                                            |      |       |      |      |   |   |   |                                           |   |
|----------------------------------------------------------------------------------------------------------------------------------------------------------------------------------------------------------------------------------------------------------------------------|------|-------|------|------|---|---|---|-------------------------------------------|---|
| CUGB1_HUMAN (Q92879) CUG triplet repeat RNA-binding protein 1 (CUG-BP1) (RNA-binding protein BRUNOL-2) (Deadenylation factor CUG-BP) (50 kDa Nuclear polyadenylated RNA-binding protein) (EDEN-BP) [MASS=52063]                                                            | 0.00 | 9.05  | 0.55 | 0.00 | 1 | 2 | 3 | AM[147]HQAQTM[147]EGC[339]SSPMVVK         | 1 |
|                                                                                                                                                                                                                                                                            |      |       |      |      |   |   | 3 | AM[147]AQTAIKAMHQAQTMEGC[330]SSPM[147]VVK | 1 |
| CUTL1_HUMAN (P39880) Homeobox protein cut-like 1 (CCAAT displacement protein) (CDP) [MASS=164271]                                                                                                                                                                          | 0.00 | 3.99  | 0.69 | 0.00 | 1 | 4 | 2 | PWNKLTVR                                  | 1 |
|                                                                                                                                                                                                                                                                            |      |       |      |      |   |   | 3 | VLGLSQGSVSDM[147]LSR                      | 1 |
|                                                                                                                                                                                                                                                                            |      |       |      |      |   |   | 3 | MKQFLSDEQNILALR                           | 1 |
|                                                                                                                                                                                                                                                                            |      |       |      |      |   |   | 2 | EAQDAPGLDPQGAADC[330]AQGVLR               | 1 |
| CX022_HUMAN (Q6ZTR5) Protein CXorf22 [MASS=110392]                                                                                                                                                                                                                         | *    | 1.74  | *    | *    | * | 1 | 3 | LHENYYAM[147]YLKYLRSVR                    | 1 |
| CXA1_HUMAN (P17302) Gap junction alpha-1 protein (Connexin-43) (Cx43) (Gap junction 43 kDa heart protein) [MASS=42877]                                                                                                                                                     | 0.00 | 7.61  | 0.52 | 0.00 | 1 | 3 | 2 | VKMRGGLLR                                 | 1 |
|                                                                                                                                                                                                                                                                            |      |       |      |      |   |   | 2 | GLLRITYIISILFK                            | 1 |
|                                                                                                                                                                                                                                                                            |      |       |      |      |   |   | 2 | DC[339]GSQK                               | 1 |
| CY1_HUMAN (P08574) Cytochrome c1, heme protein, mitochondrial precursor (Cytochrome c-1) [MASS=35390]                                                                                                                                                                      | 1.00 | 11.38 | 1.37 | 0.05 | 4 | 2 | 2 | HGGEDYVFSLLTGYC[339]EPPTGVSLR             | 1 |
|                                                                                                                                                                                                                                                                            |      |       |      |      |   |   | 2 | HLVGVC[330]YTEDEAK                        | 1 |
|                                                                                                                                                                                                                                                                            |      |       |      |      |   |   | 2 | HLVGVC[339]YTEDEAK                        | 1 |
|                                                                                                                                                                                                                                                                            |      |       |      |      |   |   | 1 | HLVGVC[330]YTEDEAK                        | 1 |
| CY24B_HUMAN (P04839) Cytochrome b-245 heavy chain (p22 phagocyte B-cytochrome) (Neutrophil cytochrome b 91 kDa polypeptide) (CGD91-phox) (gp91-phox) (gp91-1) (Heme-binding membrane glycoprotein gp91phox) (Cytochrome b(558) subunit beta) (Cytochrome b558 [MASS=65204] | 0.00 | 5.98  | 0.65 | 0.00 | 1 | 1 | 3 | NPEGGLYLAVTLLAGITGVVITLC[339]LILIITSSTK   | 1 |
|                                                                                                                                                                                                                                                                            |      |       |      |      |   |   |   |                                           |   |
| CYTC_HUMAN (P01034) Cystatin C precursor (Neuroendocrine basic polypeptide) (Gamma-trace) (Post-gamma-globulin) [MASS=15799]                                                                                                                                               | 0.00 | 11.64 | 0.14 | 0.00 | 1 | 1 | 3 | TQPNLDNC[330]PFHDQPHLK                    | 1 |
| DAPK1_HUMAN (P53355) Death-associated protein kinase 1 (EC 2.7.11.1) (DAP kinase 1) [MASS=160220]                                                                                                                                                                          | 0.00 | 2.23  | 2.34 | 0.00 | 1 | 2 | 2 | DLSSGTMVDVPALIK                           | 1 |
|                                                                                                                                                                                                                                                                            |      |       |      |      |   |   | 2 | WLC[339]TNVLGKLLSVETPR                    | 1 |
| DAPK3_HUMAN (O43293) Death-associated protein kinase 3 (EC 2.7.11.1) (DAP kinase 3) (DAP-like kinase) (DIK) (ZIP-kinase) [MASS=52535]                                                                                                                                      | 0.00 | 5.29  | *    | *    | * | 1 | 3 | QEDVEDHYEMGEELGSGQFAIVRK                  | 1 |

|                                                                                                                                                                                                                                                                              |      |       |      |      |   |   |        |                                                                            |        |
|------------------------------------------------------------------------------------------------------------------------------------------------------------------------------------------------------------------------------------------------------------------------------|------|-------|------|------|---|---|--------|----------------------------------------------------------------------------|--------|
| DAXX_HUMAN (Q9UER7) Death domain-associated protein 6 (Daxx) (hDaxx) (Fas death domain-associated protein) (ETS1-associated protein 1) (EAP1) [MASS=81372]                                                                                                                   | *    | 3.11  | *    | *    | * | 1 | 2      | LQEKELDLSELDDPDSAYLQEAR                                                    | 1      |
| DC12_HUMAN (Q96FZ2) UPF0361 protein DC12 [MASS=40575]                                                                                                                                                                                                                        | *    | 5.93  | *    | *    | * | 1 | 2      | GLSDIHRMPAILDGEEAVSK                                                       | 1      |
| DCAK2_HUMAN (Q8N568) Serine/threonine-protein kinase DCAMKL2 (EC 2.7.11.1) (Doublecortin-like and CAM kinase-like 2) [MASS=83639]                                                                                                                                            | *    | 3.52  | *    | *    | * | 2 | 2<br>2 | LVTVIRSGVK<br>TAHSFEQVLTDITEAIK                                            | 1<br>1 |
| DCE2_HUMAN (Q05329) Glutamate decarboxylase 2 (EC 4.1.1.15) (Glutamate decarboxylase, 65 kDa isoform) (GAD-65) (65 kDa glutamic acid decarboxylase) [MASS=65411]                                                                                                             | *    | 10.26 | *    | *    | * | 2 | 3<br>2 | LSGVERANSVTWNPBKMMGVPLQC[339]SALLVR<br>EIIGWPGGSGDGIFSPGGAISNMYAM[147]MIAR | 1<br>1 |
| DCUP_HUMAN (P06132) Uroporphyrinogen decarboxylase (EC 4.1.1.37) (URO-D) (UPD) [MASS=40787]                                                                                                                                                                                  | 0.00 | 7.36  | *    | *    | * | 1 | 3      | YIANLGHGLYPDMDPEHVGAFVDAVHK                                                | 1      |
| DCXR_HUMAN (Q7Z4W1) L-xylulose reductase (EC 1.1.1.10) (XR) (Dicarbonyl/L-xylulose reductase) (Kidney dicarbonyl reductase) (kiDCR) (Carbonyl reductase II) (Sperm surface protein P34H) [MASS=25913]                                                                        | 0.22 | 14.75 | 0.69 | 0.00 | 1 | 2 | 2<br>2 | GALDM[147]LTKVM[147]ALELGPHKIR<br>GVPGAIVNVSSQC[330]SQR                    | 1<br>1 |
| DDAH1_HUMAN (O94760) NG,NG-dimethylarginine dimethylaminohydrolase 1 (EC 3.5.3.18) (Dimethylargininase-1) (Dimethylarginine dimethylaminohydrolase 1) (DDAH1) (DDAH-1) [MASS=30990]                                                                                          | *    | 7.04  | *    | *    | * | 1 | 2      | EVDM[147]MKEALEKLQLNIVEM[147]K                                             | 1      |
| DDR1_HUMAN (Q08345) Epithelial discoidin domain-containing receptor 1 precursor (EC 2.7.10.1) (Epithelial discoidin domain receptor 1) (Tyrosine kinase DDR) (Discoidin receptor tyrosine kinase) (Tyrosine-protein kinase CAK) (Cell adhesion kinase) (TRK E) [MASS=101127] | *    | 2.85  | *    | *    | * | 1 | 3      | AFQAMQVHC[330]NNMHTLGARLPGGVEC[339]R                                       | 1      |
| DDX1_HUMAN (Q92499) ATP-dependent RNA helicase DDX1 (EC 3.6.1.-) (DEAD box protein 1) (DEAD box protein retinoblastoma) (DBP-RB) [MASS=82432]                                                                                                                                | *    | 6.08  | *    | *    | * | 2 | 3<br>3 | VTYGQKRAAGGGSYK<br>IM[147]HFPTWVLDKGEDSVPTVHHVVVPVNP                       | 1<br>1 |

|                                                                                                                                                                                                                  |      |       |      |      |    |   |   |                                       |   |
|------------------------------------------------------------------------------------------------------------------------------------------------------------------------------------------------------------------|------|-------|------|------|----|---|---|---------------------------------------|---|
| DDX46_HUMAN (Q7L014) Probable ATP-dependent RNA helicase DDX46 (EC 3.6.1.-) (DEAD box protein 46) (PRP5 homolog) [MASS=117460]                                                                                   | 0.00 | 3.00  | 0.29 | 0.00 | 1  | 2 | 2 | RGAEIIVC[330]TPGR                     | 1 |
|                                                                                                                                                                                                                  |      |       |      |      |    |   | 2 | QTVM[147]FSATFPRAM[147]EALARR         | 1 |
| DECR_HUMAN (Q16698) 2,4-dienoyl-CoA reductase, mitochondrial precursor (EC 1.3.1.34) (2,4-dienoyl-CoA reductase [NADPH]) (4-enoyl-CoA reductase [NADPH]) [MASS=36067]                                            | *    | 3.58  | *    | *    | *  | 1 | 2 | ILYQNTEALQSK                          | 1 |
| DEN2C_HUMAN (Q68D51) DENN domain-containing protein 2C [MASS=106865]                                                                                                                                             | 0.00 | 0.86  | 1.21 | 0.00 | 1  | 1 | 2 | YNC[339]HQEIR                         | 1 |
| DGKQ_HUMAN (P52824) Diacylglycerol kinase theta (EC 2.7.1.107) (Diglyceride kinase theta) (DGK-theta) (DAG kinase theta) [MASS=101403]                                                                           | *    | 3.82  | *    | *    | *  | 2 | 3 | PRMDDGLLEVVGVTGVVHMGQVQGGLRSGIR       | 1 |
|                                                                                                                                                                                                                  |      |       |      |      |    |   | 1 | GLHKR                                 | 1 |
| DHB2_HUMAN (P37059) Estradiol 17-beta-dehydrogenase 2 (EC 1.1.1.62) (17-beta-HSD 2) (Microsomal 17-beta-hydroxysteroid dehydrogenase) (20 alpha-hydroxysteroid dehydrogenase) (20-alpha-HSD) (E2DH) [MASS=42785] | *    | 5.17  | *    | *    | *  | 1 | 3 | AAVTMFSSVMRLELSKWGIK                  | 1 |
| DHDDS_HUMAN (Q86SQ9) Dehydrodolichyl diphosphate synthase (EC 2.5.1.-) (Dedol-PP synthase) [MASS=38689]                                                                                                          | 0.00 | 6.31  | 0.44 | 0.00 | 1  | 1 | 2 | C[330]QVERQEGHSQGFNKLAETLR            | 1 |
|                                                                                                                                                                                                                  |      |       |      |      |    |   | 3 | AKPYEGSILEADC[339]DILIPAASEK          | 3 |
|                                                                                                                                                                                                                  |      |       |      |      |    |   | 2 | AKPYEGSILEADC[339]DILIPAASEK          | 2 |
| DHE3_HUMAN (P00367) Glutamate dehydrogenase 1, mitochondrial precursor (EC 1.4.1.3) (GDH) [MASS=61397]                                                                                                           | 1.00 | 24.37 | 2.36 | 0.06 | 11 | 7 | 3 | IHKPC[339]NHVLSLSFPIR                 | 1 |
|                                                                                                                                                                                                                  |      |       |      |      |    |   | 3 | IFLERNIM[147]VIPDLYLNAGGVTVSYFEWLK    | 1 |
|                                                                                                                                                                                                                  |      |       |      |      |    |   | 3 | EM[147]SWIADTYASTIGHYDINAHAC[330]VTGK | 1 |
|                                                                                                                                                                                                                  |      |       |      |      |    |   | 2 | TPC[330]KGGIR                         | 1 |
|                                                                                                                                                                                                                  |      |       |      |      |    |   | 3 | AKPYEGSILEADC[330]DILIPAASEK          | 1 |
|                                                                                                                                                                                                                  |      |       |      |      |    |   | 2 | IHKPC[339]NHVLSLSFPIR                 | 1 |
|                                                                                                                                                                                                                  |      |       |      |      |    |   | 2 | IHKPC[330]NHVLSLSFPIR                 | 1 |
|                                                                                                                                                                                                                  |      |       |      |      |    |   | 2 | AGPAALGSASADSAALLGWAR                 | 1 |
|                                                                                                                                                                                                                  |      |       |      |      |    |   | 2 | C[339]AVVDVPPFGGAK                    | 1 |
|                                                                                                                                                                                                                  |      |       |      |      |    |   | 1 | C[339]AVVDVPPFGGAK                    | 1 |

|                                                                                                                                                                            |      |       |      |      |   |   |   |                                                                                                                                                                |                            |
|----------------------------------------------------------------------------------------------------------------------------------------------------------------------------|------|-------|------|------|---|---|---|----------------------------------------------------------------------------------------------------------------------------------------------------------------|----------------------------|
| DHPR_HUMAN (P09417) Dihydropteridine reductase (EC 1.5.1.34) (HDHPR) (Quinoid dihydropteridine reductase) [MASS=25803]                                                     | 0.56 | 15.57 | 0.25 | 0.00 | 1 | 2 | 2 | GAVHQLC[330]QSLAGK<br>LLGEEKVDAILC[339]VAGGWAGGNAKSK                                                                                                           | 1<br>1                     |
| DHSA_HUMAN (P31040) Succinate dehydrogenase [ubiquinone] flavoprotein subunit, mitochondrial precursor (EC 1.3.5.1) (Fp) (Flavoprotein subunit of complex II) [MASS=72691] | 1.00 | 9.04  | 1.39 | 0.12 | 3 | 3 | 2 | AAFGLSEAGFNTAC[330]VTK<br>AC[339]ALSIEESC[339]RPGDK<br>HVNGQDQIVPGLYAC[339]GEAAC[330]ASVHGANR<br>HVNGQDQIVPGLYAC[330]GEAAC[330]ASVHGANR                        | 1<br>1<br>1<br>1           |
| DHSB_HUMAN (P21912) Succinate dehydrogenase [ubiquinone] iron-sulfur protein, mitochondrial precursor (EC 1.3.5.1) (Ip) (Iron-sulfur subunit of complex II) [MASS=31630]   | 1.00 | 9.29  | 1.95 | 0.04 | 6 | 3 | 1 | KFAIYR<br>C[330]HTIM[147]NC[330]TR<br>C[330]HTIMNC[330]TR<br>C[339]HTIMNC[339]TR<br>GAQTAAATAPR<br>C[339]HTIM[147]NC[339]TR                                    | 1<br>1<br>1<br>1<br>1<br>3 |
| DHX30_HUMAN (Q7L2E3) Putative ATP-dependent RNA helicase DHX30 (EC 3.6.1.-) (DEAH box protein 30) [MASS=133937]                                                            | *    | 3.43  | *    | *    | * | 2 | 3 | ATISLSDSDLLRLEGDSR<br>DTILNAIEQHPVVVISGDTGC[339]GK                                                                                                             | 1<br>1                     |
| DHX57_HUMAN (Q6P158) Putative ATP-dependent RNA helicase DHX57 (EC 3.6.1.-) (DEAH box protein 57) [MASS=155603]                                                            | *    | 3.46  | *    | *    | * | 3 | 3 | TTQIPQFILDSDLNGPPEKVANIIC[330]TQPRR<br>EGLRAREIEK<br>GGGKGSSR                                                                                                  | 1<br>1<br>1                |
| DHX8_HUMAN (Q14562) ATP-dependent RNA helicase DHX8 (EC 3.6.1.-) (DEAH box protein 8) (RNA helicase HRH1) [MASS=139314]                                                    | 0.00 | 5.49  | 2.87 | 0.00 | 1 | 3 | 3 | FHQTEGDHLLAVYNSWKNNK<br>FSNPWC[339]YENFIQARSLRR<br>AYRDEM[147]LTTNVPEIQRTNLASTVLSLK                                                                            | 1<br>1<br>1                |
| DHX9_HUMAN (Q08211) ATP-dependent RNA helicase A (EC 3.6.1.-) (Nuclear DNA helicase II) (NDH II) (DEAH box protein 9) [MASS=140880]                                        | 0.00 | 8.98  | 0.93 | 0.00 | 1 | 6 | 3 | VILSTNIAETSITINDVVYVIDSC[339]K<br>AIEPPPLDAVIEAEHTLR<br>IRTRISAK<br>QKFM[147]C[330]EVQVEGYNYTGMGNSTNKK<br>M[147]ARYDNGSGYRR<br>KFESEILEAISQNSVVIIRGATGC[339]GK | 1<br>1<br>1<br>1<br>1<br>1 |
| DIAP3_HUMAN (Q9NSV4) Protein diaphanous homolog 3 (Diaphanous-related formin-3) (DRF3) [MASS=127594]                                                                       | *    | 5.86  | *    | *    | * | 4 | 2 | M[147]M[147]EDM[147]NLNEDKKAPLR<br>PEISMRR<br>M[147]MILEVDETRLAESMIQNLIK<br>SFSKLELVLLM[147]GNYMNAGSR                                                          | 1<br>1<br>1<br>1           |
| DJBP_HUMAN (Q5THR3) DJ-1-binding protein (CAP-binding protein complex-interacting protein 1) [MASS=172929]                                                                 | *    | 5.66  | *    | *    | * | 3 | 3 | ELMQM[147]LDPGDTGVVNTSMFIDLIEENC[339]RM[147]R<br>M[147]QEVLEEC[330]GC[339]SLTEGELTHLLNSWGVSR<br>YPDFLSRFSSSETAATPMATGDSAVAQR                                   | 1<br>1<br>1                |



|                                                                                                                                                                                                        |      |      |      |      |   |   |   |                                             |   |
|--------------------------------------------------------------------------------------------------------------------------------------------------------------------------------------------------------|------|------|------|------|---|---|---|---------------------------------------------|---|
| DLDH_HUMAN (P09622) Dihydrolipoyl dehydrogenase, mitochondrial precursor (EC 1.8.1.4) (Dihydrolipoamide dehydrogenase) (Glycine cleavage system L protein) [MASS=54150]                                | 1.00 | 9.04 | 1.22 | 0.01 | 3 | 2 | 2 | VC[330]HAHPTLSEAFR                          | 1 |
|                                                                                                                                                                                                        |      |      |      |      |   |   | 3 | VLGAHILGPGAGEM[147]VNEAALALEYGASC[339]EDIAR | 1 |
|                                                                                                                                                                                                        |      |      |      |      |   |   | 2 | VC[339]HAHPTLSEAFR                          | 1 |
| DLL1_HUMAN (O00548) Delta-like protein 1 precursor (Drosophila Delta homolog 1) (Delta1) (H-Delta-1) [MASS=77956]                                                                                      | 0.00 | 1.11 | 0.98 | 0.00 | 1 | 1 | 2 | NC[330]SAPVSR                               | 1 |
| DMBT1_HUMAN (Q9UGM3) Deleted in malignant brain tumors 1 protein precursor (Glycoprotein 340) (Gp-340) (Surfactant pulmonary-associated D-binding protein) [MASS=260734]                               | 0.00 | 4.19 | 5.26 | 0.00 | 1 | 4 | 2 | VC[330]DGARGSFSSSNFM[147]SIRFISDHSITR       | 1 |
|                                                                                                                                                                                                        |      |      |      |      |   |   | 3 | C[339]VWDIEVQNNYR                           | 1 |
|                                                                                                                                                                                                        |      |      |      |      |   |   | 3 | PTPSPDTWPTSHASTAGSESSLALRLVNGGDR            | 1 |
|                                                                                                                                                                                                        |      |      |      |      |   |   | 3 | GRVEVLYRGSWGTVC[330]DDYWDTNDANVVC[339]R     | 1 |
| DMXL1_HUMAN (Q9Y485) Protein DmX-like 1 (X-like 1 protein) [MASS=337852]                                                                                                                               | *    | 2.97 | *    | *    | * | 4 | 3 | M[147]EQMSLM[147]ALADTIATTSTDIGESRDR        | 1 |
|                                                                                                                                                                                                        |      |      |      |      |   |   | 3 | QSIFRNIGTGVMQIETGPANHIFSC[330]GADGTMKMR     | 1 |
|                                                                                                                                                                                                        |      |      |      |      |   |   | 3 | AVIWGLYRAEK                                 | 1 |
|                                                                                                                                                                                                        |      |      |      |      |   |   | 3 | AGC[339]PM[147]LALEVLKMPKVIK                | 1 |
| DMXL2_HUMAN (Q8TDJ6) Protein DmX-like 2 (Rabconnectin-3) [MASS=339755]                                                                                                                                 | 0.00 | 0.63 | 2.00 | 0.00 | 1 | 1 | 2 | C[339]IAGEVAIVRDPDAGEGTK                    | 1 |
| DNJA2_HUMAN (O60884) DnaJ homolog subfamily A member 2 (HIRA-interacting protein 4) (Cell cycle progression restoration gene 3 protein) (Dnj3) (NY-REN-14 antigen) [MASS=45745]                        | 0.93 | 6.07 | 1.95 | 0.00 | 1 | 2 | 2 | IGLVEALC[339]GFQFTFK                        | 1 |
|                                                                                                                                                                                                        |      |      |      |      |   |   | 2 | DGNDLHM[147]TYK                             | 1 |
| DNL4_HUMAN (P49917) DNA ligase 4 (EC 6.5.1.1) (DNA ligase IV) (Polydeoxyribonucleotide synthase [ATP] 4) [MASS=103970]                                                                                 | 0.00 | 3.84 | 0.14 | 0.00 | 1 | 2 | 2 | PEYVSGLM[147]DELDILIVGGYWGK                 | 1 |
|                                                                                                                                                                                                        |      |      |      |      |   |   | 2 | KAPPSSILC[330]GTEK                          | 2 |
| DNM3L_HUMAN (Q9UJW3) DNA (cytosine-5)-methyltransferase 3-like [MASS=43670]                                                                                                                            | 0.91 | 5.94 | *    | *    | * | 1 | 3 | VHAM[147]SNWVC[339]YLC[330]LPSSRSGLLQR      | 1 |
| DNS2B_HUMAN (Q8WZ79) Deoxyribonuclease-2-beta precursor (EC 3.1.22.1) (Deoxyribonuclease II beta) (DNase II beta) (DNase2-like acid DNase) (DNase II-like acid DNase) (Endonuclease DLAD) [MASS=41712] | *    | 2.49 | *    | *    | * | 1 | 2 | QKMM[147]ARLLR                              | 1 |
| DOC10_HUMAN (Q96BY6) Deducator of cytokinesis protein 10 (Protein zizimin 3) [MASS=249311]                                                                                                             | 0.00 | 3.11 | 6.00 | 0.00 | 1 | 3 | 3 | EHEKDPEMLVDLQYSLANSYASTPELRR                | 1 |
|                                                                                                                                                                                                        |      |      |      |      |   |   | 2 | KVSELNQLC[339]TM[147]EEVDM[147]IR           | 1 |
|                                                                                                                                                                                                        |      |      |      |      |   |   | 3 | DM[147]SQSPTSNFIRSC[339]KNLLNVEK            | 1 |

|                                                                                                                                                                                                                      |      |      |      |      |   |   |   |                                           |   |
|----------------------------------------------------------------------------------------------------------------------------------------------------------------------------------------------------------------------|------|------|------|------|---|---|---|-------------------------------------------|---|
| DOCK1_HUMAN (Q14185) Deducator of cytokinesis protein 1 (180 kDa protein downstream of CRK) (DOCK180) [MASS=215374]                                                                                                  | *    | 4.56 | *    | *    | * | 4 | 2 | LLPGDIHQIR                                | 1 |
|                                                                                                                                                                                                                      |      |      |      |      |   |   | 3 | IGEDAEVLSLYDPVESKFISENYLVRWSSSGLPK        | 1 |
|                                                                                                                                                                                                                      |      |      |      |      |   |   | 2 | QHFIFQPVAGENDFLQTVINKVIAAK                | 1 |
|                                                                                                                                                                                                                      |      |      |      |      |   |   | 3 | NSKHQEIFEKEFK                             | 1 |
| DOCK4_HUMAN (Q8N110) Deducator of cytokinesis protein 4 [MASS=225147]                                                                                                                                                | *    | 5.04 | *    | *    | * | 6 | 2 | TELNKEEMYIRYIHK                           | 1 |
|                                                                                                                                                                                                                      |      |      |      |      |   |   | 2 | DWTVM[147]RLVANNVIITTVLYLSDALRK           | 1 |
|                                                                                                                                                                                                                      |      |      |      |      |   |   | 3 | DIYITVHIIRIGR                             | 1 |
|                                                                                                                                                                                                                      |      |      |      |      |   |   | 3 | DTPVQASSHHLFVQM[147]K                     | 2 |
| DOCK8_HUMAN (Q8NF50) Deducator of cytokinesis protein 8 [MASS=230819]                                                                                                                                                | *    | 4.38 | *    | *    | * | 5 | 2 | LVANNVIITTVLYLSDALRK                      | 1 |
|                                                                                                                                                                                                                      |      |      |      |      |   |   | 2 | IGRMGAGEK                                 | 1 |
|                                                                                                                                                                                                                      |      |      |      |      |   |   | 3 | TRISVIQKEEFVLTPIEVAIEDM[147]K             | 1 |
|                                                                                                                                                                                                                      |      |      |      |      |   |   | 2 | ARLEEALLRGEGAR                            | 1 |
| DOCK8_HUMAN (Q8NF50) Deducator of cytokinesis protein 8 [MASS=230819]                                                                                                                                                | *    | 4.38 | *    | *    | * | 5 | 3 | KAVSAIHSSLLSSHDLDPRC[339]VK               | 1 |
|                                                                                                                                                                                                                      |      |      |      |      |   |   | 2 | LPPNYSM[147]HSAEKVPLQNPPIK                | 1 |
|                                                                                                                                                                                                                      |      |      |      |      |   |   | 2 | FPLNENLR                                  | 1 |
|                                                                                                                                                                                                                      |      |      |      |      |   |   | 2 | FPLNENLR                                  | 1 |
| DOK1_HUMAN (Q99704) Docking protein 1 (Downstream of tyrosine kinase 1) (p62(dok)) (pp62) [MASS=52391]                                                                                                               | *    | 6.44 | *    | *    | * | 1 | 3 | LDC[330]KVIRLAEC[330]VSVAPVTVETPPEPGATAFR | 1 |
| DPP6_HUMAN (P42658) Dipeptidyl aminopeptidase-like protein 6 (Dipeptidylpeptidase VI) (Dipeptidylpeptidase 6) (Dipeptidyl peptidase IV-like protein) (Dipeptidyl aminopeptidase-related protein) (DPPX) [MASS=97587] | 0.49 | 6.94 | 0.37 | 0.00 | 1 | 3 | 3 | MREYYITM[147]VKWATSTK                     | 1 |
|                                                                                                                                                                                                                      |      |      |      |      |   |   | 2 | FTGKINTSR                                 | 1 |
|                                                                                                                                                                                                                      |      |      |      |      |   |   | 3 | DYGGYLSTYILPAKGENQGQFTFC[330]GSALSPITDFK  | 1 |
| DPYL2_HUMAN (Q16555) Dihydropyrimidinase-related protein 2 (DRP-2) (Collapsin response mediator protein 2) (CRMP-2) (N2A3) [MASS=62293]                                                                              | 1.00 | 5.77 | 0.62 | 0.23 | 3 | 2 | 3 | THNSSLEYNIFEGM[147]EC[330]R               | 1 |
|                                                                                                                                                                                                                      |      |      |      |      |   |   | 2 | FQLTDC[330]QIYEVLVIR                      | 1 |
|                                                                                                                                                                                                                      |      |      |      |      |   |   | 2 | THNSSLEYNIFEGM[147]EC[330]R               | 1 |
| DRP2_HUMAN (Q13474) Dystrophin-related protein 2 [MASS=107673]                                                                                                                                                       | *    | 1.68 | *    | *    | * | 2 | 2 | LKQLQDAHR                                 | 1 |
|                                                                                                                                                                                                                      |      |      |      |      |   |   | 1 | HAFPSVR                                   | 1 |
| DSC1_HUMAN (Q08554) Desmocollin-1 precursor (Desmosomal glycoprotein 2/3) (DG2/DG3) [MASS=100044]                                                                                                                    | 0.00 | 2.35 | 0.50 | 0.00 | 1 | 1 | 2 | VNLEEC[330]LKSASLIRSSDPAFR                | 1 |
| DSG4_HUMAN (Q86SJ6) Desmoglein-4 precursor [MASS=113824]                                                                                                                                                             | 0.00 | 1.35 | 0.27 | 0.00 | 1 | 1 | 3 | DGAADGLSSEC[330]DC[330]R                  | 1 |

|                                                                                                                                                                                                  |      |       |      |      |   |    |   |                                                   |   |
|--------------------------------------------------------------------------------------------------------------------------------------------------------------------------------------------------|------|-------|------|------|---|----|---|---------------------------------------------------|---|
| DUET_HUMAN (Q9Y2A5) Serine/threonine-protein kinase Duet (EC 2.7.11.1) (Serine/threonine kinase with Dbl- and pleckstrin homology domain) [MASS=144412]                                          | *    | 2.02  | *    | *    | * | 1  | 3 | PYSSVPAGSEKPPKGSYNPLPLK                           | 1 |
| DUS23_HUMAN (Q9BVJ7) Dual specificity protein phosphatase 23 (EC 3.1.3.48) (EC 3.1.3.16) (Low molecular mass dual specificity phosphatase 3) (LDP-3) (VH1-like phosphatase Z) [MASS=16588]       | 0.00 | 16.67 | 1.13 | 0.00 | 1 | 1  | 2 | TGTMLAC[339]YLVKERGLAAGDAIAEIR                    | 1 |
| DYH5_HUMAN (Q8TE73) Ciliary dynein heavy chain 5 (Axonemal beta dynein heavy chain 5) (HL1) [MASS=529002]                                                                                        | *    | 4.04  | *    | *    | * | 10 | 3 | RIANIEHMTYEVYKYAAR                                | 1 |
|                                                                                                                                                                                                  |      |       |      |      |   |    | 2 | EEYRPVATR                                         | 1 |
|                                                                                                                                                                                                  |      |       |      |      |   |    | 3 | GAGMDM[147]VFFADAM[147]VHLVKISR                   | 1 |
|                                                                                                                                                                                                  |      |       |      |      |   |    | 2 | RLWQMTK                                           | 1 |
|                                                                                                                                                                                                  |      |       |      |      |   |    | 3 | TIAQARKYIVDSM[147]GEEK                            | 1 |
|                                                                                                                                                                                                  |      |       |      |      |   |    | 3 | DLC[339]VNGAQILHFK                                | 1 |
|                                                                                                                                                                                                  |      |       |      |      |   |    | 2 | FMDVTFAKIQNTNQALRM[147]LK                         | 1 |
|                                                                                                                                                                                                  |      |       |      |      |   |    | 3 | C[339]YITLAQALGMSM[147]GGAPAGPAGTGKTETTKDM[147]GR | 1 |
|                                                                                                                                                                                                  |      |       |      |      |   |    | 2 | LVGDVLLATAFLSYSGPFNQEFR                           | 1 |
|                                                                                                                                                                                                  |      |       |      |      |   |    | 3 | ASVTLAIPNIVMAPALEDVQQTLNK                         | 1 |
| DYH9_HUMAN (Q9NYC9) Ciliary dynein heavy chain 9 (Axonemal beta dynein heavy chain 9) [MASS=511928]                                                                                              | *    | 2.67  | *    | *    | * | 7  | 2 | STWDLIRLYLHESNRVYR                                | 1 |
|                                                                                                                                                                                                  |      |       |      |      |   |    | 2 | LGKVEFSGVR                                        | 1 |
|                                                                                                                                                                                                  |      |       |      |      |   |    | 2 | NLPFNYYTTSAMLQAVLEK                               | 1 |
|                                                                                                                                                                                                  |      |       |      |      |   |    | 3 | AM[147]ADEEEQKVAVIM[147]LEVKQK                    | 1 |
|                                                                                                                                                                                                  |      |       |      |      |   |    | 2 | SIQDAIRDK                                         | 1 |
|                                                                                                                                                                                                  |      |       |      |      |   |    | 2 | KLIYFIDDM[147]NM[147]PEVDAYGTVQPHTIIR             | 1 |
| DYHC_HUMAN (Q14204) Dynein heavy chain, cytosolic (DYHC) (Cytoplasmic dynein heavy chain 1) (DHC1) (Dynein heavy chain 1, cytoplasmic 1) [MASS=532404]                                           | *    | 2.20  | *    | *    | * | 6  | 2 | PLVLC[339]GPPGSGKTMTLFSALR                        | 1 |
|                                                                                                                                                                                                  |      |       |      |      |   |    | 3 | NEKIAFIM[147]DESNVLDSGFLER                        | 1 |
|                                                                                                                                                                                                  |      |       |      |      |   |    | 2 | RSELEEQQM[147]HLNVGLRK                            | 1 |
|                                                                                                                                                                                                  |      |       |      |      |   |    | 2 | EFGPVVIDYGK                                       | 1 |
|                                                                                                                                                                                                  |      |       |      |      |   |    | 3 | EVDGLDVSKEGTEAWAAM[147]KR                         | 1 |
|                                                                                                                                                                                                  |      |       |      |      |   |    | 2 | LAETVFNFQEK                                       | 1 |
| DYL1_HUMAN (P63167) Dynein light chain 1, cytoplasmic (Dynein light chain LC8-type 1) (8 kDa dynein light chain) (DLC8) (Protein inhibitor of neuronal nitric oxide synthase) (PIN) [MASS=10366] | 1.00 | 41.57 | 0.79 | 0.00 | 2 | 2  | 2 | YNPTWHC[330]IVGR                                  | 1 |
|                                                                                                                                                                                                  |      |       |      |      |   |    | 2 | AVIKNADMSEEM[147]QQDSVEC[339]ATQALEK              | 1 |
|                                                                                                                                                                                                  |      |       |      |      |   |    | 2 | YNPTWHC[339]IVGR                                  | 1 |
| DYN1_HUMAN (Q05193) Dynamin-1 (EC 3.6.5.5) [MASS=97407]                                                                                                                                          | 0.65 | 5.09  | 0.59 | 0.19 | 2 | 3  | 3 | RPLVLQLVNATTEYAFLHC[330]K                         | 1 |
|                                                                                                                                                                                                  |      |       |      |      |   |    | 3 | DLMPKTIM[147]HLM[147]INNNTK                       | 1 |
|                                                                                                                                                                                                  |      |       |      |      |   |    | 2 | IREPC[330]LK                                      | 1 |

|                                                                                                                                                                                                                                                              |      |       |      |      |   |   |   |                                              |   |
|--------------------------------------------------------------------------------------------------------------------------------------------------------------------------------------------------------------------------------------------------------------|------|-------|------|------|---|---|---|----------------------------------------------|---|
| DYRL1_HUMAN (Q86XF0) Dihydrofolate reductase-like protein 1 [MASS=21620]                                                                                                                                                                                     | *    | 26.20 | *    | *    | * | 2 | 3 | VDM[147]IWIVGGSSVYKEAM[147]NHLGHLK           | 1 |
|                                                                                                                                                                                                                                                              |      |       |      |      |   |   | 3 | M[147]FLLNC[339]IVAVSQNMGIGKNGDLPR           | 1 |
|                                                                                                                                                                                                                                                              |      |       |      |      |   |   | 1 | C[330]LEENLGIDKR                             | 1 |
|                                                                                                                                                                                                                                                              |      |       |      |      |   |   | 2 | C[330]LEENLGIDKR                             | 2 |
| EAA2_HUMAN (P43004) Excitatory amino acid transporter 2 (Sodium-dependent glutamate/aspartate transporter 2) [MASS=62104]                                                                                                                                    | 1.00 | 9.06  | 0.53 | 0.36 | 7 | 3 | 2 | NLFPENLVQAC[330]FQQIQTVTK                    | 2 |
|                                                                                                                                                                                                                                                              |      |       |      |      |   |   | 2 | NLFPENLVQAC[330]FQQIQTVTKK                   | 1 |
|                                                                                                                                                                                                                                                              |      |       |      |      |   |   | 2 | NLFPENLVQAC[339]FQQIQTVTK                    | 1 |
|                                                                                                                                                                                                                                                              |      |       |      |      |   |   | 2 | C[339]LEENLGIDKR                             | 1 |
| ECHA_HUMAN (P40939) Trifunctional enzyme subunit alpha, mitochondrial precursor (TP-alpha) (78 kDa gastrin-binding protein) [Includes: Long-chain enoyl-CoA hydratase (EC 4.2.1.17); Long chain 3-hydroxyacyl-CoA dehydrogenase (EC 1.1.1.211)] [MASS=82999] | 1.00 | 16.38 | 1.32 | 0.06 | 4 | 6 | 3 | EVEAIPDHC[339]IFASNTSALPISEIAAVSK            | 1 |
|                                                                                                                                                                                                                                                              |      |       |      |      |   |   | 3 | SAVLISSKPGC[339]FIAGADINM[147]LAAC[339]K     | 1 |
|                                                                                                                                                                                                                                                              |      |       |      |      |   |   | 2 | M[147]VGVPAALDM[147]M[147]LTGRSIR            | 1 |
|                                                                                                                                                                                                                                                              |      |       |      |      |   |   | 2 | ALM[147]GLYHGQVLC[339]K                      | 1 |
|                                                                                                                                                                                                                                                              |      |       |      |      |   |   | 2 | GLVEKLTAYAM[147]TIPFVRQQVYK                  | 1 |
|                                                                                                                                                                                                                                                              |      |       |      |      |   |   | 3 | QFTPC[339]QLLADHANS PNKK                     | 1 |
| ECHM_HUMAN (P30084) Enoyl-CoA hydratase, mitochondrial precursor (EC 4.2.1.17) (Short chain enoyl-CoA hydratase) (SCEH) (Enoyl-CoA hydratase 1) [MASS=31387]                                                                                                 | *    | 10.34 | *    | *    | * | 1 | 3 | KPVIAAVNGYAFGGGC[339]ELAM[147]MC[339]DIYAGEK | 1 |
| ECHP_HUMAN (Q08426) Peroxisomal bifunctional enzyme (PBE) (PBE) [Includes: Enoyl-CoA hydratase (EC 4.2.1.17); 3,2-trans-enoyl-CoA isomerase (EC 5.3.3.8); 3-hydroxyacyl-CoA dehydrogenase (EC 1.1.1.35)] [MASS=79208]                                        | 0.00 | 5.26  | 1.02 | 0.00 | 1 | 2 | 3 | RLC[330]NKPIQSLPNMDSIFSEALLK                 | 1 |
|                                                                                                                                                                                                                                                              |      |       |      |      |   |   | 3 | PVSSVGVVGLGTM[147]GR                         | 1 |
| EDD1_HUMAN (O95071) Ubiquitin-protein ligase EDD1 (EC 6.3.2.-) (Hyperplastic discs protein homolog) (hHYD) (Progesterin-induced protein) [MASS=309350]                                                                                                       | *    | 2.79  | *    | *    | * | 3 | 3 | TTNSSHANGAAQAPRSMQWAVRNTQHQR                 | 1 |
|                                                                                                                                                                                                                                                              |      |       |      |      |   |   | 3 | QDLVYFWTSSPSLPASEEGFQPMPSITIR                | 1 |
|                                                                                                                                                                                                                                                              |      |       |      |      |   |   | 3 | LPNLEC[339]IQNANKGTHHTSLMQR                  | 1 |
| EF1A1_HUMAN (P68104) Elongation factor 1-alpha 1 (EF-1-alpha-1) (Elongation factor 1 A-1) (eEF1A-1) (Elongation factor Tu) (EF-Tu) [MASS=50141]                                                                                                              | 0.00 | 6.28  | *    | *    | * | 2 | 2 | C[330]GGIDKR                                 | 1 |
|                                                                                                                                                                                                                                                              |      |       |      |      |   |   | 2 | C[339]GGIDKR                                 | 1 |
|                                                                                                                                                                                                                                                              |      |       |      |      |   |   | 2 | PLRLPLQDVYKIGGIGTVPVGR                       | 1 |
| EF1A2_HUMAN (Q05639) Elongation factor 1-alpha 2 (EF-1-alpha-2) (Elongation factor 1 A-2) (eEF1A-2) (Statin S1) [MASS=50470]                                                                                                                                 | 1.00 | 1.94  | 0.76 | 0.04 | 3 | 1 | 2 | RGNVC[330]GDSK                               | 1 |

|                                                                                                                                                                   |                        |       |      |      |    |   |   |                                                 |   |
|-------------------------------------------------------------------------------------------------------------------------------------------------------------------|------------------------|-------|------|------|----|---|---|-------------------------------------------------|---|
| EF1G_HUMAN (P26641) Elongation factor 1-gamma (EF-1-gamma) (eEF-1B gamma) [MASS=49987]                                                                            | *                      | 2.52  | *    | *    | *  | 1 | 3 | DGWSLWYSEYR                                     | 1 |
| EF2_HUMAN (P13639) Elongation factor 2 (EF-2) [MASS=95206]                                                                                                        | 0.64                   | 4.08  | 3.81 | 0.00 | 1  | 3 | 3 | ARFPDGLAEDIDK                                   | 1 |
|                                                                                                                                                                   |                        |       |      |      |    |   | 2 | TFC[339]QLILDPIFK                               | 1 |
|                                                                                                                                                                   |                        |       |      |      |    |   | 1 | YEWDVAEAR                                       | 1 |
| EFNB3_HUMAN (Q15768) Ephrin-B3 precursor (EPH-related receptor tyrosine kinase ligand 8) (LERK-8) (EPH-related receptor transmembrane ligand ELK-L3) [MASS=35835] | *                      | 11.18 | *    | *    | *  | 2 | 3 | EGLESLQGGVC[339]LTRGMK                          | 1 |
|                                                                                                                                                                   |                        |       |      |      |    |   | 3 | C[339]EAPPAPNLLTTC[330]DRPDLDLR                 | 1 |
| EFTS_HUMAN (P43897) Elongation factor Ts, mitochondrial precursor (EF-Ts) (EF-TsMt) [MASS=35390]                                                                  | 0.00                   | 27.69 | 0.85 | 0.00 | 1  | 4 | 3 | GFLNSSELSGLPAGPDR                               | 1 |
|                                                                                                                                                                   |                        |       |      |      |    |   | 3 | DQLALAI GK LG ENM[147]ILK                       | 1 |
|                                                                                                                                                                   |                        |       |      |      |    |   | 2 | FQLLVQQVALGTMMHC[330]QTLK                       | 1 |
|                                                                                                                                                                   |                        |       |      |      |    |   | 3 | TNLEDVGRRLGQHVVM[147]APLSVGS LDDEPGGEAETK       | 1 |
|                                                                                                                                                                   |                        |       |      |      |    |   | 3 | HYAHTDC[330]PGHADYVK                            | 1 |
|                                                                                                                                                                   |                        |       |      |      |    |   | 2 | KGDEC[330]ELLGHSK                               | 2 |
| EFTU_HUMAN (P49411) Elongation factor Tu, mitochondrial precursor (EF-Tu) (P43) [MASS=49541]                                                                      | 1.00                   | 24.34 | 1.45 | 0.05 | 10 | 6 | 2 | KGDEC[339]ELLGHSK                               | 2 |
|                                                                                                                                                                   |                        |       |      |      |    |   | 3 | HYAHTDC[339]PGHADYVK                            | 1 |
|                                                                                                                                                                   |                        |       |      |      |    |   | 3 | LLDAVDTYIPV PAR                                 | 1 |
|                                                                                                                                                                   |                        |       |      |      |    |   | 2 | HYAHTDC[339]PGHADYVK                            | 2 |
|                                                                                                                                                                   |                        |       |      |      |    |   | 2 | HYAHTDC[330]PGHADYVK                            | 1 |
|                                                                                                                                                                   |                        |       |      |      |    |   | 3 | ELLTEFGYKGEETPVVGSALC[330]ALEGRDPELGLK          | 1 |
|                                                                                                                                                                   |                        |       |      |      |    |   | 3 | GTVVVTGLTERGILKK                                | 1 |
| 2                                                                                                                                                                 | TTLTAAITKILAE G G AKFK | 1     |      |      |    |   |   |                                                 |   |
| EGLN_HUMAN (P17813) Endoglin precursor (CD105 antigen) [MASS=70578]                                                                                               | 0.00                   | 4.86  | 0.97 | 0.00 | 1  | 1 | 3 | SAYSSC[339]GM[147]QVSASM[147]ISNEAVVNILSSSSPQRK | 1 |
| ELAV2_HUMAN (Q12926) ELAV-like protein 2 (Hu-antigen B) (HuB) (ELAV-like neuronal protein 1) (Nervous system-specific RNA-binding protein Hel-N1) [MASS=39504]    | 0.40                   | 8.64  | 2.54 | 0.00 | 1  | 2 | 2 | PSSASIRDANLYV SGLPK                             | 1 |
|                                                                                                                                                                   |                        |       |      |      |    |   | 2 | SLFGSIGEIESC[339]K                              | 1 |
| ELF2_HUMAN (Q15723) ETS-related transcription factor Elf-2 (E74-like factor 2) (New ETS-related factor) [MASS=63966]                                              | *                      | 4.55  | *    | *    | *  | 1 | 3 | LSM[147]PTQQASGQTPPRVISAVIKGPEVK                | 1 |

|                                                                                                                                                                                                                                                                               |      |      |       |      |   |   |        |                                                            |        |
|-------------------------------------------------------------------------------------------------------------------------------------------------------------------------------------------------------------------------------------------------------------------------------|------|------|-------|------|---|---|--------|------------------------------------------------------------|--------|
| ENC1_HUMAN (O14682) Ectoderm-neural cortex 1 protein (ENC-1) (p53-induced protein 10) (Nuclear matrix protein NRP/B) [MASS=66129]                                                                                                                                             | 0.00 | 6.62 | 1.02  | 0.00 | 1 | 2 | 3      | NLHPTNC[330]LGM[147]LLLSDAHQC[330]TK<br>LKLFAFGGTSVSHDKLPK | 1<br>1 |
| ENK9_HUMAN (Q9UKH7) HERV-K_5q13.3 provirus ancestral Env polyprotein precursor (Envelope polyprotein) (HERV-K104 envelope protein) [Includes: Truncated surface protein (SU)] [MASS=31420]                                                                                    | 0.46 | 6.86 | 1.27  | 0.00 | 1 | 1 | 2      | C[339]PAKPEEEGM[147]M[147]INISTGYR                         | 1      |
| ENOA_HUMAN (P06733) Alpha-enolase (EC 4.2.1.11) (2-phospho-D-glycerate hydro-lyase) (Non-neural enolase) (NNE) (Enolase 1) (Phosphopyruvate hydratase) (C-myc promoter-binding protein) (MBP-1) (MPB-1) (Plasminogen-binding protein) [MASS=47037]                            | 0.00 | 5.08 | *     | *    | * | 1 | 2      | SGETEDTFIADLVVGLC[330]TGQIK                                | 1      |
| ENOB_HUMAN (P13929) Beta-enolase (EC 4.2.1.11) (2-phospho-D-glycerate hydro-lyase) (Muscle-specific enolase) (MSE) (Skeletal muscle enolase) (Enolase 3) [MASS=46855]                                                                                                         | 1.00 | 5.31 | *     | *    | * | 2 | 2<br>3 | AC[330]NC[330]LLLK<br>GNPTVEVDLHTAKGR                      | 1<br>1 |
| ENOG_HUMAN (P09104) Gamma-enolase (EC 4.2.1.11) (2-phospho-D-glycerate hydro-lyase) (Neural enolase) (Neuron-specific enolase) (NSE) (Enolase 2) [MASS=47137]                                                                                                                 | 1.00 | 8.55 | 0.58  | 0.25 | 2 | 1 | 3      | DATNVGDEGGFAPNILENSEALELVKEAIDKAGYTEK                      | 1      |
|                                                                                                                                                                                                                                                                               |      |      |       |      |   |   | 3      | VSLSGSSDPHLC[339]R                                         | 6      |
| ENP2_HUMAN (Q9Y5L3) Ectonucleoside triphosphate diphosphohydrolase 2 (EC 3.6.1.-) (NTPDase2) (Ecto-ATPase) (CD39 antigen-like 1) [MASS=53665]                                                                                                                                 | 0.00 | 8.28 | 53.44 | 0.00 | 1 | 2 | 3      | AADTAVGWALGYM[147]LNLTLNLPADPPGLR                          | 1      |
| ENPP1_HUMAN (P22413) Ectonucleotide pyrophosphatase/phosphodiesterase 1 (E-NPP 1) (Phosphodiesterase I/nucleotide pyrophosphatase 1) (Plasma-cell membrane glycoprotein PC-1) [Includes: Alkaline phosphodiesterase I (EC 3.1.4.1); Nucleotide pyrophosphatase] [MASS=104924] | 0.00 | 2.70 | 0.10  | 2.69 | 2 | 2 | 2<br>2 | KC[330]GTYTK<br>C[330]LNLILISDHGMEQGSC[330]JK              | 1<br>1 |

|                                                                                                                                                                                                                                                                            |      |      |      |      |   |   |                       |                                                                                                                 |                       |
|----------------------------------------------------------------------------------------------------------------------------------------------------------------------------------------------------------------------------------------------------------------------------|------|------|------|------|---|---|-----------------------|-----------------------------------------------------------------------------------------------------------------|-----------------------|
| ENPP2_HUMAN (Q13822) Ectonucleotide pyrophosphatase/phosphodiesterase 2 (E-NPP2) (Phosphodiesterase I/nucleotide pyrophosphatase 2) (Phosphodiesterase I alpha) (PD-lalpha) (Autotaxin) [Includes: Alkaline phosphodiesterase I (EC 3.1.4.1); Nucleotide pyro [MASS=99003] | *    | 1.51 | *    | *    | * | 1 | 2                     | C[339]FELQEAGPPDC[330]R                                                                                         | 1                     |
| EPHA4_HUMAN (P54764) Ephrin type-A receptor 4 precursor (EC 2.7.10.1) (Tyrosine-protein kinase receptor SEK) (Receptor protein-tyrosine kinase HEK8) [MASS=109859]                                                                                                         | 0.00 | 1.93 | 0.56 | 0.00 | 1 | 1 | 3                     | C[330]PPHSYSVWEGATSC[330]TC[330]DR                                                                              | 1                     |
| EPHA5_HUMAN (P54756) Ephrin type-A receptor 5 precursor (EC 2.7.10.1) (Tyrosine-protein kinase receptor EHK-1) (EPH homology kinase 1) (Receptor protein-tyrosine kinase HEK7) [MASS=114784]                                                                               | 0.21 | 7.62 | *    | *    | * | 5 | 2<br>2<br>2<br>3<br>2 | M[147]HFHNGHIK<br>VSNLLAEHSPLGSGAYRSVGEWLEAIK<br>IM[147]NSLQEMKVQLVNGMVPL<br>VIGAGEFGVEVC[330]SGR<br>SVGEWLEAIK | 1<br>1<br>1<br>1<br>1 |
| EPHA6_HUMAN (Q9UF33) Ephrin type-A receptor 6 precursor (EC 2.7.10.1) (Tyrosine-protein kinase receptor EHK-2) (EPH homology kinase 2) [MASS=116116]                                                                                                                       | 0.21 | 1.84 | 0.15 | 0.00 | 1 | 1 | 2                     | DTPKLYC[330]GADGDWLVP LGR                                                                                       | 1                     |
| EPHA7_HUMAN (Q15375) Ephrin type-A receptor 7 precursor (EC 2.7.10.1) (Tyrosine-protein kinase receptor EHK-3) (EPH homology kinase 3) (Receptor protein-tyrosine kinase HEK11) [MASS=112082]                                                                              | 0.21 | 2.71 | *    | *    | * | 1 | 3                     | RDFLC[330]EASIM[147]GQFDHPNVVHLEGVVTR                                                                           | 1                     |
| EPM2A_HUMAN (O95278) Laforin (EC 3.1.3.48) (EC 3.1.3.16) (Lafora PTPase) (LAFPTPase) [MASS=37157]                                                                                                                                                                          | 0.00 | 5.74 | 0.59 | 0.00 | 1 | 2 | 1<br>2                | FGKVR<br>GHIVYVHC[330]NAGVGR                                                                                    | 1<br>1                |
| ERAL_HUMAN (O75616) GTP-binding protein era homolog (hERA) (ERA-W) (Conserved ERA-like GTPase) (CEGA) [MASS=48350]                                                                                                                                                         | *    | 3.43 | *    | *    | * | 1 | 2                     | ERVIPFSSLLGFQRR                                                                                                 | 1                     |
| ERBB3_HUMAN (P21860) Receptor tyrosine-protein kinase erbB-3 precursor (EC 2.7.10.1) (c-erbB3) (Tyrosine kinase-type cell surface receptor HER3) [MASS=148097]                                                                                                             | *    | 2.16 | *    | *    | * | 2 | 3<br>3                | M[147]ARDPPRYLVIK<br>DGPHC[339]VSSC[339]PHGVLGAK                                                                | 1<br>1                |

|                                                                                                                                                                                                                                                                              |      |      |      |      |   |   |   |                                        |   |
|------------------------------------------------------------------------------------------------------------------------------------------------------------------------------------------------------------------------------------------------------------------------------|------|------|------|------|---|---|---|----------------------------------------|---|
| ERCC3_HUMAN (P19447) TFIIH basal transcription factor complex helicase XPB subunit (EC 3.6.1.-) (Basic transcription factor 2 89 kDa subunit) (BTF2-p89) (TFIIH 89 kDa subunit) (DNA-repair protein complementing XP-B cells) (Xeroderma pigmentosum group B-c [MASS=89277]) | *    | 2.30 | *    | *    | * | 1 | 2 | TQEWGLM[147]ILDEVHTIPAK                | 1 |
| ERO1A_HUMAN (Q96HE7) ERO1-like protein alpha precursor (EC 1.8.4.-) (ERO1-Lalpha) (Oxidoreductin-1-Lalpha) (Endoplasmic oxidoreductin-1-like protein) (ERO1-L) [MASS=54392]                                                                                                  | 0.00 | 6.41 | 0.88 | 0.00 | 1 | 1 | 3 | HDDSSDNFC[330]EADDIQSPEAEYVDLLLNP      | 1 |
| ESCO1_HUMAN (Q5FWF5) N-acetyltransferase ESCO1 (EC 2.3.1.-) (Establishment of cohesion 1 homolog 1) (ECO1 homolog 1) (ESO1 homolog 1) (Establishment factor-like protein 1) (EFO1p) (hEFO1) (CTF7 homolog 1) [MASS=95008]                                                    | *    | 3.33 | *    | *    | * | 1 | 2 | LGLLRFSFPPALEM[147]HHPVTQSTFLGTK       | 1 |
| ESPL1_HUMAN (Q14674) Separin (EC 3.4.22.49) (Separase) (Caspase-like protein ESPL1) (Extra spindle poles-like 1 protein) [MASS=233112]                                                                                                                                       | *    | 3.49 | *    | *    | * | 4 | 3 | GLLLPSSEEPGPAQEASRLQELLQDC[330]GWKYPDR | 1 |
|                                                                                                                                                                                                                                                                              |      |      |      |      |   |   | 1 | AISAVEK                                | 1 |
|                                                                                                                                                                                                                                                                              |      |      |      |      |   |   | 2 | PGTYPEVPPEKLRHC[330]FR                 | 1 |
|                                                                                                                                                                                                                                                                              |      |      |      |      |   |   | 2 | M[147]EVLIASLEKSVLGC[330]WK            | 1 |
| ETFD_HUMAN (Q16134) Electron transfer flavoprotein-ubiquinone oxidoreductase, mitochondrial precursor (EC 1.5.5.1) (ETF-QO) (ETF-ubiquinone oxidoreductase) (ETF dehydrogenase) (Electron-transferring-flavoprotein dehydrogenase) [MASS=68507]                              | 0.86 | 8.27 | 1.77 | 0.05 | 2 | 3 | 1 | HKGSDFER                               | 1 |
|                                                                                                                                                                                                                                                                              |      |      |      |      |   |   | 2 | RWEGVNM[147]ERFAEEADVIVGAGPAGLSAAVR    | 1 |
|                                                                                                                                                                                                                                                                              |      |      |      |      |   |   | 2 | LQINAQNC[339]VHC[339]K                 | 2 |
| ETV7_HUMAN (Q9Y603) Transcription factor ETV7 (Transcription factor Tel-2) (ETS-related protein Tel2) (Tel-related Ets factor) [MASS=38998]                                                                                                                                  | *    | 4.40 | *    | *    | * | 1 | 2 | C[330]EAQINLLGEGGIC[339]K              | 1 |
| EXO1_HUMAN (Q9UQ84) Exonuclease 1 (EC 3.1.-.-) (hExo1) (Exonuclease I) (hExol) [MASS=94103]                                                                                                                                                                                  | *    | 3.19 | *    | *    | * | 2 | 3 | EC[330]FTRSINITHAM[147]AHK             | 1 |
|                                                                                                                                                                                                                                                                              |      |      |      |      |   |   | 2 | TISPPTLGLR                             | 1 |
| EXOC2_HUMAN (Q96KP1) Exocyst complex component 2 (Exocyst complex component Sec5) [MASS=104066]                                                                                                                                                                              | 0.00 | 5.95 | 2.70 | 0.00 | 1 | 3 | 3 | NDKGDIIVTTKSGGR                        | 1 |
|                                                                                                                                                                                                                                                                              |      |      |      |      |   |   | 3 | WILQLMHSC[339]KEGYVKDLK                | 1 |
|                                                                                                                                                                                                                                                                              |      |      |      |      |   |   | 3 | FKSSMHLQLTC[339]FQAASSTM[147]M[147]KT  | 1 |



|                                                                                                                                                                                                                                                                             |      |       |      |      |   |   |   |                                |   |
|-----------------------------------------------------------------------------------------------------------------------------------------------------------------------------------------------------------------------------------------------------------------------------|------|-------|------|------|---|---|---|--------------------------------|---|
| EXT1_HUMAN (Q16394) Exostosin-1 (EC 2.4.1.224) (EC 2.4.1.225) (Glucuronosyl-N-acetylglucosaminyl-proteoglycan/N-acetylglucosaminyl-proteoglycan 4-alpha-N-acetylglucosaminyltransferase) (Putative tumor suppressor protein EXT1) (Multiple exostoses protein [MASS=86254]) | 0.00 | 2.82  | 1.11 | 0.00 | 1 | 1 | 2 | FYTSDPSQAC[330]LFVLSLDTLDR     | 1 |
| EXTL1_HUMAN (Q92935) Exostosin-like 1 (EC 2.4.1.224) (Glucuronosyl-N-acetylglucosaminyl-proteoglycan 4-alpha-N-acetylglucosaminyltransferase) (Exostosin-L) (Multiple exostosis-like protein) [MASS=74696]                                                                  | 0.00 | 3.11  | *    | *    | * | 1 | 3 | WELPFSEVIDWTKAAIVADER          | 1 |
|                                                                                                                                                                                                                                                                             |      |       |      |      |   |   | 2 | PALM[147]TAIDGR                | 8 |
| FA35A_HUMAN (Q86V20) Protein FAM35A [MASS=93704]                                                                                                                                                                                                                            | *    | 3.95  | *    | *    | * | 3 |   |                                |   |
|                                                                                                                                                                                                                                                                             |      |       |      |      |   |   | 2 | VLQVAKKMK                      | 1 |
|                                                                                                                                                                                                                                                                             |      |       |      |      |   |   | 2 | C[330]GLELETDENRIYK            | 1 |
| FA38A_HUMAN (Q92508) Protein FAM38A [MASS=233040]                                                                                                                                                                                                                           | 0.00 | 0.74  | 3.14 | 0.00 | 1 | 1 | 2 | C[339]GYPTRILGNFLTKK           | 1 |
| FA47A_HUMAN (Q5JRC9) Protein FAM47A [MASS=89095]                                                                                                                                                                                                                            | *    | 1.80  | *    | *    | * | 1 | 3 | APESHQFSEPPKIR                 | 1 |
| FABPE_HUMAN (Q01469) Fatty acid-binding protein, epidermal (E-FABP) (Psoriasis-associated fatty acid-binding protein homolog) (PA-FABP) [MASS=15033]                                                                                                                        | *    | 12.69 | *    | *    | * | 1 | 2 | DGKLVVEC[330]VMNNVTC[330]TR    | 1 |
| FACD2_HUMAN (Q9BXW9) Fanconi anemia group D2 protein (Protein FACD2) [MASS=166461]                                                                                                                                                                                          | 0.00 | 4.42  | 1.31 | 0.00 | 1 | 3 | 3 | GRASSSGNQESSGQSC[339]IILLFDVIK | 1 |
|                                                                                                                                                                                                                                                                             |      |       |      |      |   |   | 3 | EIVNAFC[330]QETSPEMK           | 1 |
|                                                                                                                                                                                                                                                                             |      |       |      |      |   |   | 3 | LPEYFFENKNSDEINIPRLIVSQLK      | 1 |

|                                                                                                                                                                                                                                                                               |      |       |      |      |   |   |   |                                     |   |
|-------------------------------------------------------------------------------------------------------------------------------------------------------------------------------------------------------------------------------------------------------------------------------|------|-------|------|------|---|---|---|-------------------------------------|---|
| FACE1_HUMAN (O75844) CAAX prenyl protease 1 homolog (EC 3.4.24.84) (Prenyl protein-specific endoprotease 1) (Farnesylated proteins-converting enzyme 1) (FACE-1) (Zinc metalloproteinase Ste24 homolog) [MASS=54812]                                                          | 0.00 | 11.16 | 1.75 | 0.00 | 1 | 3 | 3 | NIIISQMNSFLC[339]FFLFAVLIGRK        | 1 |
|                                                                                                                                                                                                                                                                               |      |       |      |      |   |   | 2 | NEEVLAVLGHELGHWK                    | 1 |
|                                                                                                                                                                                                                                                                               |      |       |      |      |   |   | 3 | FEFQADAFAKKLGK                      | 1 |
| FAK1_HUMAN (Q05397) Focal adhesion kinase 1 (EC 2.7.10.2) (FADK 1) (pp125FAK) (Protein-tyrosine kinase 2) [MASS=119232]                                                                                                                                                       | 0.00 | 2.38  | 2.66 | 0.00 | 1 | 1 | 2 | SDYMLEIADQVDQEIALKLGK[339]LEIR      | 1 |
| FAK2_HUMAN (Q14289) Protein tyrosine kinase 2 beta (EC 2.7.10.2) (Focal adhesion kinase 2) (FADK 2) (Proline-rich tyrosine kinase 2) (Cell adhesion kinase beta) (CAK beta) (Calcium-dependent tyrosine kinase) (CADTK) (Related adhesion focal tyrosine kinas) [MASS=115874] | 0.00 | 2.48  | 0.69 | 0.00 | 1 | 1 | 2 | C[330]LPLEEGQAVLQLGIEGAPQALSIIK     | 1 |
| FAM3B_HUMAN (P58499) Protein FAM3B precursor (Cytokine-like protein 2-21) [MASS=25982]                                                                                                                                                                                        | 0.00 | 6.38  | 1.01 | 0.00 | 1 | 1 | 2 | C[330]FDMYEGDNSGPM[147]JTK          | 1 |
| FAM5C_HUMAN (Q76B58) Protein FAM5C precursor (DBCCR1-like protein 1) [MASS=88445]                                                                                                                                                                                             | 0.00 | 4.57  | 0.27 | 0.00 | 1 | 2 | 2 | FPEC[330]NC[330]PSM[147]DIQAMEENLLR | 1 |
|                                                                                                                                                                                                                                                                               |      |       |      |      |   |   | 2 | TFFETVHIYLRRIK                      | 1 |
| FAM9B_HUMAN (Q8IZU0) Protein FAM9B [MASS=22438]                                                                                                                                                                                                                               | 0.00 | 6.45  | 0.41 | 0.00 | 1 | 1 | 2 | DPVRDEC[330]EERNR                   | 1 |
| FANCC_HUMAN (Q00597) Fanconi anemia group C protein (Protein FACC) [MASS=63428]                                                                                                                                                                                               | *    | 2.87  | *    | *    | * | 1 | 2 | MYEALKEM[147]DSNTVIER               | 1 |
| FANCM_HUMAN (Q8IYD8) Fanconi anemia group M protein (EC 3.6.1.-) (ATP-dependent RNA helicase FANCM) (Protein FACM) (Fanconi anemia-associated polypeptide of 250 kDa) (FAAP250) (Protein Hef ortholog) [MASS=232190]                                                          | 0.00 | 2.83  | 1.91 | 0.00 | 1 | 3 | 3 | QQDHC[339]LNSVPSGSSAQSKVRSTPR       | 1 |
|                                                                                                                                                                                                                                                                               |      |       |      |      |   |   | 2 | SLIQRNVLMR                          | 1 |
|                                                                                                                                                                                                                                                                               |      |       |      |      |   |   | 3 | SC[339]HSVEDGQLLTSNESEDDEIFRR       | 1 |
| FARP1_HUMAN (Q9Y4F1) FERM, RhoGEF and pleckstrin domain-containing protein 1 (Chondrocyte-derived ezrin-like protein) [MASS=118632]                                                                                                                                           | 0.00 | 5.26  | 0.19 | 0.00 | 1 | 2 | 2 | VLLDAVC[330]NHLNLVEGDYFGLEFPDHK     | 1 |
|                                                                                                                                                                                                                                                                               |      |       |      |      |   |   | 2 | SHQDNHPLASLPLLGYSLTIPSESENIQK       | 1 |

|                                                                                                                                                                                                                                                                              |      |      |      |      |   |   |   |                                           |   |
|------------------------------------------------------------------------------------------------------------------------------------------------------------------------------------------------------------------------------------------------------------------------------|------|------|------|------|---|---|---|-------------------------------------------|---|
| FAS_HUMAN (P49327) Fatty acid synthase (EC 2.3.1.85) [Includes: [Acyl-carrier-protein] S-acetyltransferase (EC 2.3.1.38); [Acyl-carrier-protein] S-malonyltransferase (EC 2.3.1.39); 3-oxoacyl-[acyl-carrier-protein] synthase (EC 2.3.1.41); 3-oxoacyl-[acyl- [MASS=273398] | *    | 2.47 | *    | *    | * | 4 | 2 | AQVADVVS                                  | 1 |
|                                                                                                                                                                                                                                                                              |      |      |      |      |   |   | 2 | DPETLVGYSM[147]VGC[330]QRAM[147]M[147]ANR | 1 |
|                                                                                                                                                                                                                                                                              |      |      |      |      |   |   | 2 | SNM[147]GHPEPASGLAALAK                    | 1 |
|                                                                                                                                                                                                                                                                              |      |      |      |      |   |   | 3 | AC[339]LDTAVENM[147]PSLK                  | 1 |
| FBN1_HUMAN (P35555) Fibrillin-1 precursor [MASS=312312]                                                                                                                                                                                                                      | *    | 1.60 | *    | *    | * | 3 | 2 | STC[330]YGGYKRGQC[339]JK                  | 1 |
|                                                                                                                                                                                                                                                                              |      |      |      |      |   |   | 3 | PFFKDINEC[330]KM[147]IPSLC[339]THGK       | 1 |
|                                                                                                                                                                                                                                                                              |      |      |      |      |   |   | 3 | C[330]PTGYLNEEDTR                         | 1 |
| FBN2_HUMAN (P35556) Fibrillin-2 precursor [MASS=314347]                                                                                                                                                                                                                      | *    | 0.79 | *    | *    | * | 1 | 2 | TGMC[339]FSGLVNGRC[339]AQELPGRM[147]TK    | 1 |
| FBN3_HUMAN (Q75N90) Fibrillin-3 precursor [MASS=300370]                                                                                                                                                                                                                      | 0.72 | 1.46 | 2.21 | 0.00 | 1 | 2 | 2 | C[339]WAAGPVPELC[339]PPR                  | 1 |
|                                                                                                                                                                                                                                                                              |      |      |      |      |   |   | 3 | LEVVSHMAGPWGVQPEGQPGPWGQALR               | 1 |
| FBX39_HUMAN (Q8N4B4) F-box only protein 39 [MASS=52646]                                                                                                                                                                                                                      | *    | 5.20 | *    | *    | * | 2 | 3 | VHASEVESAVWYVKK                           | 1 |
|                                                                                                                                                                                                                                                                              |      |      |      |      |   |   | 1 | YLEHLEVK                                  | 1 |
| FBX40_HUMAN (Q9UH90) F-box only protein 40 (Muscle disease-related protein) [MASS=79663]                                                                                                                                                                                     | 0.00 | 7.33 | 0.83 | 0.00 | 1 | 2 | 3 | SC[339]PFNIVEHKTDPIILLTSMC[330]QPREQAR    | 1 |
|                                                                                                                                                                                                                                                                              |      |      |      |      |   |   | 3 | DYNMYLVHNGRM[147]LIHFGQMPAC[330]TPK       | 1 |
| FBX46_HUMAN (Q6PJ61) F-box only protein 46 (F-box only protein 34-like) [MASS=69030]                                                                                                                                                                                         | 0.00 | 5.26 | 0.91 | 0.00 | 1 | 2 | 2 | VAFFVAHQ[330]GGGRASSM[147]K               | 1 |
|                                                                                                                                                                                                                                                                              |      |      |      |      |   |   | 3 | VLLDTWYVIKPGNTK                           | 1 |
| FBXL4_HUMAN (Q9UKA2) F-box/LRR-repeat protein 4 (F-box and leucine-rich repeat protein 4) (F-box protein FBL4/FBL5) [MASS=70096]                                                                                                                                             | 0.00 | 5.64 | 1.59 | 0.00 | 1 | 2 | 2 | QFKPC[339]JK                              | 1 |
|                                                                                                                                                                                                                                                                              |      |      |      |      |   |   | 3 | C[330]TLVQWLNLNLSWTGNRGFISVAGFSRFLK       | 1 |
| FBXL6_HUMAN (Q8N531) F-box/LRR-repeat protein 6 (F-box and leucine-rich repeat protein 6) (F-box protein FBL6) (FBL6A) [MASS=58588]                                                                                                                                          | 0.00 | 7.61 | 0.44 | 0.00 | 1 | 2 | 2 | GC[330]ARITPAGLQDLPC[330]R                | 1 |
|                                                                                                                                                                                                                                                                              |      |      |      |      |   |   | 3 | GSGYHLLQSDSM[147]LLVLSEPGPARPR            | 1 |
| FGD1_HUMAN (P98174) FYVE, RhoGEF and PH domain-containing protein 1 (Faciogenital dysplasia 1 protein) (Zinc finger FYVE domain-containing protein 3) (Rho/Rac guanine nucleotide exchange factor FGD1) (Rho/Rac GEF) [MASS=106560]                                          | 0.00 | 9.16 | 0.59 | 0.00 | 1 | 4 | 2 | PGSQEVSDLEEDDEEEEEKDR                     | 1 |
|                                                                                                                                                                                                                                                                              |      |      |      |      |   |   | 2 | C[330]LFLAPGPRDGEKVPNR                    | 1 |
|                                                                                                                                                                                                                                                                              |      |      |      |      |   |   | 3 | VLPC[330]GPSPQHHRALRFSYHLEGSQPR           | 1 |
|                                                                                                                                                                                                                                                                              |      |      |      |      |   |   | 2 | QASVAAENSVIC[330]SFLHYM[147]EK            | 1 |
| FGD5_HUMAN (Q6ZNL6) FYVE, RhoGEF and PH domain-containing protein 5 (Zinc finger FYVE domain-containing protein 23) [MASS=159906]                                                                                                                                            | *    | 2.46 | *    | *    | * | 3 | 1 | VEGQSR                                    | 1 |
|                                                                                                                                                                                                                                                                              |      |      |      |      |   |   | 3 | EFLKEGTLMKVTGK                            | 1 |
|                                                                                                                                                                                                                                                                              |      |      |      |      |   |   | 2 | EQGFDHHATHILQFDR                          | 1 |

|                                                                                                                                                                                                                                           |      |      |      |      |   |   |                                      |                                                                                                                                                                                                                     |                                      |
|-------------------------------------------------------------------------------------------------------------------------------------------------------------------------------------------------------------------------------------------|------|------|------|------|---|---|--------------------------------------|---------------------------------------------------------------------------------------------------------------------------------------------------------------------------------------------------------------------|--------------------------------------|
| FGFR3_HUMAN (P22607) Fibroblast growth factor receptor 3 precursor (EC 2.7.10.1) (FGFR-3) (CD333 antigen) [MASS=87709]                                                                                                                    | 0.00 | 3.10 | 0.76 | 0.00 | 1 | 1 | 3                                    | LTLGKPLGEGC[330]FGQVVM[147]AEIIGIDK                                                                                                                                                                                 | 1                                    |
| FILA_HUMAN (P20930) Filaggrin [MASS=435166]                                                                                                                                                                                               | *    | 0.47 | *    | *    | * | 1 | 2                                    | DTASHVQSSPVQSDSSTAK                                                                                                                                                                                                 | 1                                    |
| FKBP2_HUMAN (P26885) FK506-binding protein 2 precursor (EC 5.2.1.8) (Peptidyl-prolyl cis-trans isomerase) (PPlase) (Rotamase) (13 kDa FKBP) (FKBP-13) [MASS=15649]                                                                        | 0.74 | 5.63 | 1.21 | 0.00 | 1 | 1 | 2                                    | RVDHC[339]PIK                                                                                                                                                                                                       | 1                                    |
| FLNA_HUMAN (P21333) Filamin-A (Alpha-filamin) (Filamin-1) (Endothelial actin-binding protein) (Actin-binding protein 280) (ABP-280) (Nonmuscle filamin) [MASS=280628]                                                                     | *    | 0.34 | *    | *    | * | 1 | 2                                    | LSPFMADIR                                                                                                                                                                                                           | 1                                    |
| FLNB_HUMAN (O75369) Filamin-B (FLN-B) (Beta-filamin) (Actin-binding-like protein) (Thyroid autoantigen) (Truncated actin-binding protein) (Truncated ABP) (ABP-280 homolog) (ABP-278) (Filamin 3) (Filamin homolog 1) (Fh1) [MASS=278193] | *    | 4.04 | *    | *    | * | 5 | 2<br>3<br>2<br>3<br>2                | TGRYM[147]IGVTYGGDDIPLSPYR<br>DGTAVTYVPLTAGMYTLTMK<br>IPEINSSDM[147]SAHVTSPSGR<br>VTGLHKVTVLFAGQHISKSPFEVSVDK<br>HIPGSPFTAKITDSSRR                                                                                  | 1<br>1<br>1<br>1<br>1                |
| FMNL_HUMAN (O95466) Formin-like 1 protein (Formin-like protein) (Leukocyte formin) (CLL-associated antigen KW-13) [MASS=121827]                                                                                                           | 0.00 | 8.45 | 0.97 | 0.00 | 1 | 4 | 3<br>3<br>3<br>3                     | AIM[147]NYQSGFSLVMNHPAC[330]VNEIALSLNNK<br>ELETSLRTHIGWVQEFLEENR<br>KEAAAQEAGADTPGKGEPPAPK<br>RGAAYGFRLQSLDALLEM[147]K                                                                                              | 1<br>1<br>1<br>1                     |
| FOG1_HUMAN (Q8IX07) Zinc finger protein ZFPM1 (Zinc finger protein multitype 1) (Friend of GATA protein 1) (Friend of GATA-1) (FOG-1) [MASS=104546]                                                                                       | *    | 4.98 | *    | *    | * | 2 | 3<br>3                               | SLGDM[147]EAGEEVQLVGASHMEQK<br>GATC[339]FEC[330]EITFSNVNYYVHKRLYC[330]SGR                                                                                                                                           | 1<br>1                               |
| FOXN2_HUMAN (P32314) Human T-cell leukemia virus enhancer factor (Forkhead box protein N2) [MASS=37734]                                                                                                                                   | *    | 2.05 | *    | *    | * | 1 | 2                                    | C[330]FQKVER                                                                                                                                                                                                        | 1                                    |
| FRAP_HUMAN (P42345) FKBP12-rapamycin complex-associated protein (FK506-binding protein 12-rapamycin complex-associated protein 1) (Rapamycin target protein) (RAPT1) (Mammalian target of rapamycin) (mTOR) [MASS=288890]                 | *    | 6.00 | *    | *    | * | 8 | 3<br>3<br>3<br>2<br>2<br>3<br>3<br>2 | LLM[147]C[339]RDLELAVPGTYDPNQPIIR<br>YPTLLEVLLNFLK<br>PQWYRHTFEEAEK<br>MLSLVLMHKPLRHPGMPK<br>IMLRMAPDYDHLTLMQK<br>LTRMLTNAMEVTGLDGNYRITC[339]HTVMEVLR<br>C[330]VQFLPQVM[147]PTFLNVIR<br>FANYLRNLLPSNDPVVM[147]EMASK | 1<br>1<br>1<br>1<br>1<br>1<br>1<br>1 |

|                                                                                                                                                                                                   |      |      |      |      |   |   |   |                                |   |
|---------------------------------------------------------------------------------------------------------------------------------------------------------------------------------------------------|------|------|------|------|---|---|---|--------------------------------|---|
| FREM1_HUMAN (Q5H8C1) FRAS1-related extracellular matrix protein 1 precursor (Protein QBRICK) [MASS=244122]                                                                                        | 0.00 | 2.52 | 0.56 | 0.00 | 1 | 4 | 3 | ILKTISVEVIPVNDEK               | 1 |
|                                                                                                                                                                                                   |      |      |      |      |   |   | 2 | PLVVSCKGDR                     | 1 |
|                                                                                                                                                                                                   |      |      |      |      |   |   | 3 | C[330]TQEEVDLNLRR              | 1 |
|                                                                                                                                                                                                   |      |      |      |      |   |   | 3 | LPAHQQM[147]VLGEPRPEEPR        | 1 |
| FRM4A_HUMAN (Q9P2Q2) FERM domain-containing protein 4A [MASS=113964]                                                                                                                              | *    | 3.32 | *    | *    | * | 2 | 2 | LPALPTQALKEHPSLAYC[339]JEDR    | 3 |
|                                                                                                                                                                                                   |      |      |      |      |   |   | 2 | DNATIELFFLNAK                  | 1 |
| FSCN1_HUMAN (Q16658) Fascin (Singed-like protein) (55 kDa actin-bundling protein) (p55) [MASS=54398]                                                                                              | 0.41 | 8.94 | 0.93 | 0.00 | 1 | 2 | 3 | VGKDELFALEQSC[330]AQVVLQAANER  | 1 |
|                                                                                                                                                                                                   |      |      |      |      |   |   | 3 | NGQLAASVETAGDSEFLM[147]K       | 1 |
| FSTL5_HUMAN (Q8N475) Follistatin-related protein 5 precursor (Follistatin-like 5) [MASS=95750]                                                                                                    | *    | 6.14 | *    | *    | * | 3 | 2 | VYPESQAREPGVTASLRG[339]HAEGIPK | 1 |
|                                                                                                                                                                                                   |      |      |      |      |   |   | 2 | FGFILHKDEAALQK                 | 1 |
|                                                                                                                                                                                                   |      |      |      |      |   |   | 2 | EPLKAEWPWNRK                   | 1 |
| FTHFD_HUMAN (O75891) 10-formyltetrahydrofolate dehydrogenase (EC 1.5.1.6) (10-FTHFDH) (Aldehyde dehydrogenase 1 family member L1) [MASS=98829]                                                    | *    | 1.55 | *    | *    | * | 1 | 3 | TAAC[339]LAAGNTVVIK            | 1 |
|                                                                                                                                                                                                   |      |      |      |      |   |   |   |                                |   |
| FUK_HUMAN (Q8N0W3) L-fucose kinase (EC 2.7.1.52) (Fucokinase) [MASS=117622]                                                                                                                       | 0.00 | 4.89 | 0.46 | 0.00 | 1 | 3 | 2 | LM[147]APGC[330]EPLTVRR        | 1 |
|                                                                                                                                                                                                   |      |      |      |      |   |   | 3 | AAFIC[330]AGIVHVHSELQLSEQLLR   | 1 |
|                                                                                                                                                                                                   |      |      |      |      |   |   | 2 | LNDHLLLVTGKTRLAR               | 1 |
| FXL13_HUMAN (Q8NEE6) F-box/LRR-repeat protein 13 (F-box and leucine-rich repeat protein 13) [MASS=83941]                                                                                          | 0.00 | 1.50 | 0.14 | 0.00 | 1 | 1 | 2 | AC[330]SFYTGHLVK               | 1 |
| FZD4_HUMAN (Q9ULV1) Frizzled-4 precursor (Fz-4) (hFz4) (FzE4) [MASS=59881]                                                                                                                        | *    | 4.47 | *    | *    | * | 2 | 3 | YSADDSNMAVEMLK                 | 1 |
|                                                                                                                                                                                                   |      |      |      |      |   |   | 2 | C[330]GYDAGLYSR                | 1 |
|                                                                                                                                                                                                   |      |      |      |      |   |   | 2 | VPTANVSVDLTC[330]R             | 2 |
| G3P_HUMAN (P04406) Glyceraldehyde-3-phosphate dehydrogenase (EC 1.2.1.12) (GAPDH) [MASS=35922]                                                                                                    | 1.00 | 9.28 | 0.68 | 0.07 | 5 | 2 | 2 | IISNASC[330]TTNC[330]LAPLAK    | 2 |
|                                                                                                                                                                                                   |      |      |      |      |   |   | 2 | IISNASC[339]TTNC[339]LAPLAK    | 1 |
|                                                                                                                                                                                                   |      |      |      |      |   |   |   |                                |   |
| G6PI_HUMAN (P06744) Glucose-6-phosphate isomerase (EC 5.3.1.9) (GPI) (Phosphoglucose isomerase) (PGI) (Phosphohexose isomerase) (PHI) (Neuroleukin) (NLK) (Sperm antigen 36) (SA-36) [MASS=63015] | 0.35 | 3.05 | 0.71 | 0.00 | 1 | 1 | 2 | MIPC[339]DFLIPVQTQHPIR         | 1 |

|                                                                                                                                                                                                                                                                             |      |       |      |      |    |   |   |                                            |   |
|-----------------------------------------------------------------------------------------------------------------------------------------------------------------------------------------------------------------------------------------------------------------------------|------|-------|------|------|----|---|---|--------------------------------------------|---|
| GA2L2_HUMAN (Q8NHY3) GAS2-like protein 2 (Growth arrest-specific 2-like 2) (GAS2-related protein on chromosome 17) (GAR17 protein) [MASS=96519]                                                                                                                             | *    | 6.82  | *    | *    | *  | 2 | 3 | EPAAPLESSPQPPEGLQPHWLNQAPLPPEEESWV         | 1 |
|                                                                                                                                                                                                                                                                             |      |       |      |      |    |   | 2 | IPTSWVHEETDSWGTDAGNPTPQRLR                 | 1 |
| GABR1_HUMAN (Q9UBS5) Gamma-aminobutyric acid type B receptor, subunit 1 precursor (GABA-B receptor 1) (GABA-B-R1) (Gb1) [MASS=108320]                                                                                                                                       | 0.00 | 1.56  | 1.17 | 0.00 | 1  | 1 | 2 | C[339]LANGSWTDMDTPSR                       | 1 |
| GABT_HUMAN (P80404) 4-aminobutyrate aminotransferase, mitochondrial precursor (EC 2.6.1.19) ((S)-3-amino-2-methylpropionate transaminase) (EC 2.6.1.22) (Gamma-amino-N-butyrate transaminase) (GABA transaminase) (GABA aminotransferase) (GABA-AT) (GABA-T) ( [MASS=56439] | 1.00 | 12.00 | 1.25 | 0.07 | 5  | 4 | 2 | TM[147]GC[330]LATTHSK                      | 1 |
|                                                                                                                                                                                                                                                                             |      |       |      |      |    |   | 3 | KHGC[339]AFLVDEVQTGGGC[339]TGK             | 1 |
|                                                                                                                                                                                                                                                                             |      |       |      |      |    |   | 2 | GVVLGGC[339]GDK                            | 1 |
|                                                                                                                                                                                                                                                                             |      |       |      |      |    |   | 2 | MMTGGFFHKEEFRPNAPYR                        | 1 |
|                                                                                                                                                                                                                                                                             |      |       |      |      |    |   | 2 | TM[147]GC[339]LATTHSK                      | 2 |
| GBB1_HUMAN (P62873) Guanine nucleotide-binding protein G(I)/G(S)/G(T) subunit beta 1 (Transducin beta chain 1) [MASS=37246]                                                                                                                                                 | 1.00 | 29.79 | 0.53 | 0.26 | 10 | 5 | 2 | LFVSGAC[330]DASAK                          | 1 |
|                                                                                                                                                                                                                                                                             |      |       |      |      |    |   | 3 | ADQELM[147]TYSHDNIIC[330]GITSVSFSK         | 1 |
|                                                                                                                                                                                                                                                                             |      |       |      |      |    |   | 3 | QTFTGHESDINAIC[339]FFPNGNAFATGSDDATC[339]R | 1 |
|                                                                                                                                                                                                                                                                             |      |       |      |      |    |   | 2 | KAC[330]ADATLSQITNNIDPVGR                  | 1 |
|                                                                                                                                                                                                                                                                             |      |       |      |      |    |   | 2 | LFVSGAC[339]DASAK                          | 1 |
|                                                                                                                                                                                                                                                                             |      |       |      |      |    |   | 2 | ELAGHTGYLSC[339]C[339]R                    | 1 |
|                                                                                                                                                                                                                                                                             |      |       |      |      |    |   | 2 | KAC[339]ADATLSQITNNIDPVGR                  | 1 |
|                                                                                                                                                                                                                                                                             |      |       |      |      |    |   | 2 | ELAGHTGYLSC[330]C[330]R                    | 3 |
| GBB2_HUMAN (P62879) Guanine nucleotide-binding protein G(I)/G(S)/G(T) subunit beta 2 (Transducin beta chain 2) (G protein beta 2 subunit) [MASS=37200]                                                                                                                      | 0.00 | 7.08  | 1.07 | 0.00 | 1  | 1 | 3 | ADQELLM[147]YSHDNIIC[339]GITSVAFSR         | 1 |
| GBB3_HUMAN (P16520) Guanine nucleotide-binding protein G(I)/G(S)/G(T) subunit beta 3 (Transducin beta chain 3) [MASS=37221]                                                                                                                                                 | 0.00 | 14.41 | 1.66 | 0.00 | 1  | 3 | 2 | SREGNVKVS                                  | 1 |
|                                                                                                                                                                                                                                                                             |      |       |      |      |    |   | 3 | VSC[339]LGVTDAGM[147]AVATGSWDSFLKIWN       | 1 |
|                                                                                                                                                                                                                                                                             |      |       |      |      |    |   | 2 | ELSAHTGYLSC[330]C[330]R                    | 1 |
| GBB4_HUMAN (Q9HAV0) Guanine nucleotide-binding protein subunit beta 4 (Transducin beta chain 4) [MASS=37436]                                                                                                                                                                | *    | 7.08  | *    | *    | *  | 1 | 3 | KAC[330]NDATLVQITSNMDSVGRIQM[147]R         | 1 |
| GBG12_HUMAN (Q9UBI6) Guanine nucleotide-binding protein G(I)/G(S)/G(O) gamma-12 subunit precursor [MASS=7875]                                                                                                                                                               | 0.94 | 19.72 | 0.77 | 0.00 | 1  | 1 | 2 | ASADLM[147]SYC[330]EEHAR                   | 1 |

|                                                                                                                                                                         |      |       |       |      |   |   |   |                                          |   |
|-------------------------------------------------------------------------------------------------------------------------------------------------------------------------|------|-------|-------|------|---|---|---|------------------------------------------|---|
| GBG2_HUMAN (P59768) Guanine nucleotide-binding protein G(I)/G(S)/G(O) gamma-2 subunit precursor (G gamma-I) [MASS=7719]                                                 | 1.00 | 20.00 | 0.52  | 0.09 | 2 | 1 | 2 | AAADLMAYC[330]EAHAK                      | 1 |
|                                                                                                                                                                         |      |       |       |      |   |   | 2 | AAADLM[147]AYC[330]EAHAK                 | 1 |
| GBG3_HUMAN (P63215) Guanine nucleotide-binding protein G(I)/G(S)/G(O) gamma-3 subunit precursor [MASS=8305]                                                             | 0.99 | 40.00 | 1.19  | 0.00 | 1 | 1 | 3 | AAADLMTYC[339]DAHAC[339]EDPLITPVPTSENPFR | 1 |
| GBG7_HUMAN (O60262) Guanine nucleotide-binding protein G(I)/G(S)/G(O) gamma-7 subunit precursor [MASS=7522]                                                             | 0.97 | 20.59 | 0.77  | 0.00 | 1 | 1 | 2 | AASDLMSYC[330]EQHAR                      | 1 |
| GCM2_HUMAN (O75603) Chorion-specific transcription factor GCMb (Glial cells missing homolog 2) (GCM motif protein 2) (hGCMb) [MASS=56609]                               | 0.00 | 4.55  | 0.20  | 0.00 | 1 | 1 | 3 | TDEAETWDVC[330]LSGLGSAVSYSR              | 1 |
| GDIA_HUMAN (P31150) Rab GDP dissociation inhibitor alpha (Rab GDI alpha) (Guanosine diphosphate dissociation inhibitor 1) (GDI-1) (XAP-4) (Oligophrenin-2) [MASS=50582] | *    | 5.37  | *     | *    | * | 1 | 3 | FLM[147]ANGQLVKM[147]LLYTEVTRYLDFK       | 1 |
| GDIB_HUMAN (P50395) Rab GDP dissociation inhibitor beta (Rab GDI beta) (Guanosine diphosphate dissociation inhibitor 2) (GDI-2) [MASS=50663]                            | 0.00 | 10.56 | 37.09 | 0.00 | 1 | 2 | 2 | VEKVGQVIRVIC[330]ILSHPIK                 | 1 |
|                                                                                                                                                                         |      |       |       |      |   |   | 2 | MNEEYDVIVLGTGLTEC[339]ILSGIM[147]SVNGK   | 1 |
| GFRA3_HUMAN (O60609) GDNF family receptor alpha-3 precursor (GFR-alpha-3) [MASS=44511]                                                                                  | *    | 4.25  | *     | *    | * | 1 | 2 | RMKNQVAC[330]LDIYWTVHR                   | 1 |
| GHC1_HUMAN (Q9H936) Mitochondrial glutamate carrier 1 (GC-1) (Glutamate/H(+)-symporter 1) (Solute carrier family 25 member 22) [MASS=34470]                             | 1.00 | 6.81  | 0.72  | 0.02 | 3 | 1 | 2 | LINGGIAGLIGVTC[339]VFPIDLAK              | 1 |
|                                                                                                                                                                         |      |       |       |      |   |   | 2 | LINGGIAGLIGVTC[330]VFPIDLAK              | 2 |
| GLNA_HUMAN (P15104) Glutamine synthetase (EC 6.3.1.2) (Glutamate--ammonia ligase) (GS) [MASS=41933]                                                                     | 0.85 | 4.57  | 0.74  | 0.00 | 1 | 1 | 2 | RPSANC[330]DPFSVTEALIR                   | 1 |
| GLPK2_HUMAN (Q14410) Glycerol kinase, testis specific 2 (EC 2.7.1.30) (ATP:glycerol 3-phosphotransferase) (Glycerokinase) (GK) [MASS=60610]                             | 0.00 | 2.89  | 1.62  | 0.00 | 1 | 1 | 2 | KC[339]VFSEHGLLTTVAYK                    | 1 |
| GLRX1_HUMAN (P35754) Glutaredoxin-1 (Thioltransferase-1) (TTase-1) [MASS=11644]                                                                                         | 0.59 | 12.38 | 0.40  | 0.00 | 1 | 1 | 2 | VVFIKPTC[330]PYC[330]R                   | 1 |

|                                                                                                                                                                                                                                                                             |      |       |       |      |   |   |   |                                     |   |
|-----------------------------------------------------------------------------------------------------------------------------------------------------------------------------------------------------------------------------------------------------------------------------|------|-------|-------|------|---|---|---|-------------------------------------|---|
| GLSK_HUMAN (O94925) Glutaminase kidney isoform, mitochondrial precursor (EC 3.5.1.2) (GLS) (L-glutamine amidohydrolase) (K-glutaminase) [MASS=73461]                                                                                                                        | 1.00 | 7.03  | 1.41  | 0.13 | 7 | 4 | 2 | LKEC[339]MDM[147]LR                 | 1 |
|                                                                                                                                                                                                                                                                             |      |       |       |      |   |   | 2 | C[339]VQSNIVLLTQAFR                 | 1 |
|                                                                                                                                                                                                                                                                             |      |       |       |      |   |   | 2 | LKEC[330]M[147]DM[147]LR            | 1 |
|                                                                                                                                                                                                                                                                             |      |       |       |      |   |   | 2 | LKEC[339]M[147]DM[147]LR            | 1 |
|                                                                                                                                                                                                                                                                             |      |       |       |      |   |   | 2 | C[330]VQSNIVLLTQAFR                 | 1 |
|                                                                                                                                                                                                                                                                             |      |       |       |      |   |   | 2 | VPFC[330]LQSC[330]VKPLK             | 1 |
|                                                                                                                                                                                                                                                                             |      |       |       |      |   |   | 3 | M[147]M[147]RLRGSGM[147]LR          | 1 |
|                                                                                                                                                                                                                                                                             |      |       |       |      |   |   | 2 | VPFC[339]LQSC[339]VKPLK             | 1 |
| GLSL_HUMAN (Q9UI32) Glutaminase liver isoform, mitochondrial precursor (EC 3.5.1.2) (GLS) (L-glutamine amidohydrolase) (L-glutaminase) [MASS=66309]                                                                                                                         | *    | 2.49  | *     | *    | * | 1 | 2 | FVIPDFEFTGHVDR                      | 1 |
| GLT14_HUMAN (Q96FL9) Polypeptide N-acetylgalactosaminyltransferase 14 (EC 2.4.1.41) (Protein-UDP acetylgalactosaminyltransferase 14) (UDP-GalNAc:polypeptide N-acetylgalactosaminyltransferase 14) (Polypeptide GalNAc transferase 14) (GalNAc-T14) (pp-GaNTas [MASS=64320] | *    | 3.99  | *     | *    | * | 1 | 2 | RLDPTEPIRTPIIAGGLFVIDK              | 1 |
| GLTP_HUMAN (Q9NZD2) Glycolipid transfer protein (GLTP) [MASS=23718]                                                                                                                                                                                                         | 0.00 | 6.73  | 15.85 | 0.00 | 1 | 1 | 2 | FIQVFLQSIC[339]DGER                 | 1 |
| GMFG_HUMAN (O60234) Glia maturation factor gamma (GMF-gamma) [MASS=16801]                                                                                                                                                                                                   | 0.00 | 13.38 | 0.73  | 0.00 | 1 | 1 | 3 | MSDSLVC[330]EVDPELTKLR              | 1 |
| GNAI1_HUMAN (P63096) Guanine nucleotide-binding protein G(i), alpha-1 subunit (Adenylate cyclase-inhibiting G alpha protein) [MASS=40230]                                                                                                                                   | 1.00 | 12.75 | 1.00  | 0.23 | 2 | 3 | 2 | EIYTHFTC[330]ATDTK                  | 1 |
|                                                                                                                                                                                                                                                                             |      |       |       |      |   |   | 3 | IIHEAGYSEEEEC[330]KQYK              | 1 |
|                                                                                                                                                                                                                                                                             |      |       |       |      |   |   | 3 | DLHFKMFDVGGQRSER                    | 1 |
| GNAL_HUMAN (P38405) Guanine nucleotide-binding protein G(olf) subunit alpha (Adenylate cyclase-stimulating G alpha protein, olfactory type) [MASS=44308]                                                                                                                    | *    | 5.51  | *     | *    | * | 1 | 2 | AC[330]FERSNEYQLIDC[330]AQYFLER     | 1 |
| GNAO1_HUMAN (P09471) Guanine nucleotide-binding protein G(o) subunit alpha 1 [MASS=39919]                                                                                                                                                                                   | 1.00 | 25.21 | 0.52  | 0.25 | 4 | 4 | 2 | SPLTIC[330]FPEYTGPNYEDAAAYIQAQFESK  | 1 |
|                                                                                                                                                                                                                                                                             |      |       |       |      |   |   | 2 | M[147]VC[330]DVVSR                  | 2 |
|                                                                                                                                                                                                                                                                             |      |       |       |      |   |   | 3 | KSPLTIC[339]FPEYTGPNYEDAAAYIQAQFESK | 1 |
|                                                                                                                                                                                                                                                                             |      |       |       |      |   |   | 3 | FFIDTSIILFLNKKDLFGEK                | 1 |



|                                                                                                                                                                                                                    |      |      |      |      |   |   |   |                                     |   |
|--------------------------------------------------------------------------------------------------------------------------------------------------------------------------------------------------------------------|------|------|------|------|---|---|---|-------------------------------------|---|
| GNAO2_HUMAN (P29777) Guanine nucleotide-binding protein G(o) subunit alpha 2 [MASS=39955]                                                                                                                          | 0.86 | 8.50 | 1.09 | 0.00 | 1 | 1 | 3 | SPLTIC[339]FPEYTGPSAFTEAVAYIQAQYESK | 1 |
| GNAZ_HUMAN (P19086) Guanine nucleotide-binding protein G(z) subunit alpha (G(x) alpha chain) (Gz-alpha) [MASS=40792]                                                                                               | *    | 8.47 | *    | *    | * | 2 | 2 | QFEDLNRNK                           | 1 |
|                                                                                                                                                                                                                    |      |      |      |      |   |   | 3 | STIVKQMKIIHSGGFNLEAC[339]K          | 1 |
| GNB1L_HUMAN (Q9BYB4) Guanine nucleotide-binding protein subunit beta-like protein 1 (G protein subunit beta-like protein 1) (WD40 repeat-containing protein deleted in VCFS) (Protein WDVCF) (DGCRK3) [MASS=35618] | *    | 5.81 | *    | *    | * | 1 | 3 | IAC[330]HEEPVMDLDFDSQKAR            | 1 |
| GGOB1_HUMAN (Q14789) Golgin subfamily B member 1 (Giantin) (Macrogolgin) (372 kDa Golgi complex-associated protein) (GCP372) [MASS=376075]                                                                         | *    | 0.58 | *    | *    | * | 2 | 2 | KLQEALTSR                           | 1 |
|                                                                                                                                                                                                                    |      |      |      |      |   |   | 2 | EFSQTLNEK                           | 1 |
| GP115_HUMAN (Q8IZF3) Probable G-protein coupled receptor 115 (G-protein coupled receptor PGR18) [MASS=83830]                                                                                                       | *    | 2.39 | *    | *    | * | 1 | 3 | GKSRAAENASLGPTNGSK                  | 1 |
| GP132_HUMAN (Q9UNW8) Probable G-protein coupled receptor 132 (G2 accumulation protein) [MASS=42499]                                                                                                                | *    | 4.47 | *    | *    | * | 2 | 3 | GDRNAM[147]C[330]GLEER              | 1 |
|                                                                                                                                                                                                                    |      |      |      |      |   |   | 1 | QEVSR                               | 1 |
| GP144_HUMAN (Q7Z7M1) Probable G-protein coupled receptor 144 (G-protein coupled receptor PGR24) [MASS=104087]                                                                                                      | 0.00 | 1.25 | 0.63 | 0.00 | 1 | 1 | 2 | AC[330]APPSEGLLFR                   | 1 |
| GP158_HUMAN (Q5T848) Probable G-protein coupled receptor 158 precursor [MASS=135488]                                                                                                                               | *    | 2.30 | *    | *    | * | 2 | 2 | TLGLAGKTQTAGVEERTK                  | 1 |
|                                                                                                                                                                                                                    |      |      |      |      |   |   | 2 | ITEIPETVSR                          | 1 |
| GPC4_HUMAN (O75487) Glypican-4 precursor (K-glypican) [MASS=62412]                                                                                                                                                 | 0.00 | 3.78 | 2.30 | 0.00 | 1 | 1 | 3 | MFRLVNSQYHFTDEYLEC[339]VSK          | 1 |
| GPDM_HUMAN (P43304) Glycerol-3-phosphate dehydrogenase, mitochondrial precursor (EC 1.1.99.5) (GPD-M) (GPDH-M) (mtGPD) [MASS=80833]                                                                                | 0.99 | 1.79 | 1.06 | 0.00 | 1 | 1 | 2 | C[339]KDVLTGQEFDVR                  | 1 |
| GPM6A_HUMAN (P51674) Neuronal membrane glycoprotein M6-a (M6a) [MASS=31209]                                                                                                                                        | 1.00 | 7.55 | 0.62 | 0.15 | 3 | 2 | 2 | KIC[339]TVSENFLR                    | 1 |
|                                                                                                                                                                                                                    |      |      |      |      |   |   | 2 | KIC[330]TVSENFLR                    | 1 |
|                                                                                                                                                                                                                    |      |      |      |      |   |   | 2 | IC[330]TVSENFLR                     | 1 |

|                                                                                                                                                                             |      |      |      |      |   |   |   |                                         |   |
|-----------------------------------------------------------------------------------------------------------------------------------------------------------------------------|------|------|------|------|---|---|---|-----------------------------------------|---|
| GPNMB_HUMAN (Q14956) Transmembrane glycoprotein NMB precursor (Transmembrane glycoprotein HGFIN) [MASS=63922]                                                               | 0.00 | 5.59 | 1.21 | 0.00 | 1 | 1 | 3 | TFNGSGTYC[339]VNLTLDGDDTSLALTSTLISVPDR  | 1 |
| GPR56_HUMAN (Q9Y653) G-protein coupled receptor 56 precursor (TM7XN1 protein) [MASS=77737]                                                                                  | 0.00 | 3.17 | 0.96 | 0.00 | 1 | 1 | 3 | GLYHFC[330]LYWNRHAGRLHLLYGK             | 1 |
| GPR83_HUMAN (Q9NYM4) Probable G-protein coupled receptor 83 precursor (G-protein coupled receptor 72) [MASS=48271]                                                          | 0.00 | 4.73 | 2.88 | 0.00 | 1 | 1 | 3 | LWLC[339]NMIGDVTTEQYFALRR               | 1 |
| GPR97_HUMAN (Q86Y34) Probable G-protein coupled receptor 97 precursor (G-protein coupled receptor PGR26) [MASS=60860]                                                       | 0.00 | 8.20 | 0.40 | 0.00 | 1 | 2 | 3 | ISQAGC[330]GVSM[147]IFLAFTIILYAFLRLSRER | 1 |
|                                                                                                                                                                             |      |      |      |      |   |   | 3 | C[330]RQSGSDSC[339]NVENLQR              | 1 |
| GPSN2_HUMAN (Q9NZ01) Synaptic glycoprotein SC2 [MASS=36034]                                                                                                                 | *    | 2.92 | *    | *    | * | 1 | 2 | FSHGTM[147]PLR                          | 1 |
| GPVI_HUMAN (Q9HCN6) Platelet glycoprotein VI precursor [MASS=36923]                                                                                                         | 0.00 | 4.13 | 1.75 | 0.05 | 2 | 1 | 3 | C[339]QGPPGVDLYRLEK                     | 3 |
| GRHL3_HUMAN (Q8TE85) Grainyhead-like protein 3 homolog (Sister of mammalian grainyhead) (Transcription factor CP2-like 4) [MASS=70318]                                      | 0.00 | 6.39 | 0.86 | 0.00 | 1 | 2 | 3 | TC[339]SPFTEEFELPSKQAKEGDLQR            | 1 |
|                                                                                                                                                                             |      |      |      |      |   |   | 2 | GC[330]LLSGFRGNETTYLR                   | 1 |
| GRIA1_HUMAN (P42261) Glutamate receptor 1 precursor (GluR-1) (GluR-A) (GluR-K1) (Glutamate receptor ionotropic, AMPA 1) (AMPA-selective glutamate receptor 1) [MASS=101535] | *    | 2.54 | *    | *    | * | 1 | 3 | NGIGYHYILANLGFMDIDLNFKK                 | 1 |
| GRIA4_HUMAN (P48058) Glutamate receptor 4 precursor (GluR-4) (GluR4) (GluR-D) (Glutamate receptor ionotropic, AMPA 4) (AMPA-selective glutamate receptor 4) [MASS=100809]   | *    | 7.21 | *    | *    | * | 3 | 2 | YTSALTYDGLVMAETFR                       | 1 |
|                                                                                                                                                                             |      |      |      |      |   |   | 3 | TVVVTTIMESPVVMYKK                       | 1 |
|                                                                                                                                                                             |      |      |      |      |   |   | 3 | AGQNGWHVSAIC[339]VENFNDVSYRQLLEELDR     | 1 |
| GRIK3_HUMAN (Q13003) Glutamate receptor, ionotropic kainate 3 precursor (Glutamate receptor 7) (GluR-7) (GluR7) (Excitatory amino acid receptor 5) (EAA5) [MASS=104031]     | 0.29 | 5.88 | 1.33 | 0.00 | 2 | 2 | 2 | GPNVDSLTLNRSLIVTTVLEEPFVMFR             | 1 |
|                                                                                                                                                                             |      |      |      |      |   |   | 3 | NC[330]NLTQIGGLIDSKGYGIGTPMGSPYR        | 2 |

|                                                                                                                                                                                                                                                                             |      |      |      |      |   |   |   |                                                    |   |
|-----------------------------------------------------------------------------------------------------------------------------------------------------------------------------------------------------------------------------------------------------------------------------|------|------|------|------|---|---|---|----------------------------------------------------|---|
| GRK4_HUMAN (Q16099) Glutamate receptor, ionotropic kainate 4 precursor (Glutamate receptor KA-1) (KA1) (Excitatory amino acid receptor 1) (EAA1) [MASS=107229]                                                                                                              | 0.00 | 1.67 | 0.54 | 0.00 | 1 | 1 | 2 | QRNC[330]NLTQIGLLDTK                               | 1 |
| GRIN1_HUMAN (Q7Z2K8) G protein-regulated inducer of neurite outgrowth 1 (GRIN1) [MASS=102371]                                                                                                                                                                               | *    | 7.84 | *    | *    | * | 4 | 2 | GSPVTTTKADPRASGK                                   | 1 |
|                                                                                                                                                                                                                                                                             |      |      |      |      |   |   | 3 | MDPASSGEGRPVSGHTDTTASAKTDLTSLK                     | 1 |
|                                                                                                                                                                                                                                                                             |      |      |      |      |   |   | 2 | HRSPSGAGEGASC[339]SDGPR                            | 1 |
|                                                                                                                                                                                                                                                                             |      |      |      |      |   |   | 3 | DYC[330]PSQQKASPAPPR                               | 1 |
| GRK4_HUMAN (P32298) G protein-coupled receptor kinase 4 (EC 2.7.11.16) (G protein-coupled receptor kinase GRK4) (IT11) [MASS=66555]                                                                                                                                         | 0.00 | 8.82 | 2.02 | 0.00 | 1 | 3 | 2 | LFRRGGC[330]LTMVPSEK                               | 1 |
|                                                                                                                                                                                                                                                                             |      |      |      |      |   |   | 2 | AVFYAAELC[339]C[339]GLEDLQR                        | 1 |
|                                                                                                                                                                                                                                                                             |      |      |      |      |   |   | 2 | AVFYAAELC[330]C[339]GLEDLQRER                      | 1 |
| GRK7_HUMAN (Q8WTQ7) G protein-coupled receptor kinase 7 precursor (EC 2.7.11.16) (G protein-coupled receptor kinase GRK7) [MASS=62211]                                                                                                                                      | *    | 5.97 | *    | *    | * | 2 | 2 | C[330]QAATTEEERVAAVTLAK                            | 1 |
|                                                                                                                                                                                                                                                                             |      |      |      |      |   |   | 2 | AGTNGYM[147]APEILM[147]JEK                         | 1 |
| GRN_HUMAN (P28799) Granulins precursor (Proepithelin) (PEPI) [Contains: Acrogranin; Paragranulin; Granulin-1 (Granulin G); Granulin-2 (Granulin F); Granulin-3 (Granulin B); Granulin-4 (Granulin A); Granulin-5 (Granulin C); Granulin-6 (Granulin D); Granul [MASS=63544] | 0.78 | 4.55 | 1.50 | 0.00 | 1 | 2 | 3 | QHC[339]C[339]PAGYTC[330]NVKARSC[330]JEK           | 1 |
|                                                                                                                                                                                                                                                                             |      |      |      |      |   |   | 2 | HC[339]C[339]PAGFR                                 | 1 |
| GRP75_HUMAN (P38646) Stress-70 protein, mitochondrial precursor (75 kDa glucose-regulated protein) (GRP 75) (Peptide-binding protein 74) (PBP74) (Mortalin) (MOT) [MASS=73680]                                                                                              | 0.99 | 2.21 | 0.49 | 1.15 | 2 | 2 | 2 | RTIAPC[330]QK                                      | 1 |
|                                                                                                                                                                                                                                                                             |      |      |      |      |   |   | 2 | TIAPC[339]QK                                       | 1 |
| GSHR_HUMAN (P00390) Glutathione reductase, mitochondrial precursor (EC 1.8.1.7) (GR) (GRase) [MASS=56257]                                                                                                                                                                   | 0.00 | 4.21 | 0.15 | 0.00 | 1 | 2 | 2 | GIYAVGDVC[330]GK                                   | 1 |
|                                                                                                                                                                                                                                                                             |      |      |      |      |   |   | 2 | VPNTKDLNLSLNK                                      | 1 |
| GSLG1_HUMAN (Q92896) Golgi apparatus protein 1 precursor (Golgi sialoglycoprotein MG-160) (E-selectin ligand 1) (ESL-1) (Cysteine-rich fibroblast growth factor receptor) (CFR-1) [MASS=134592]                                                                             | 0.00 | 5.09 | 0.85 | 0.00 | 1 | 2 | 3 | RMLMEDFSLSPEIILSC[339]RGEIEHHC[339]SGLHR           | 1 |
|                                                                                                                                                                                                                                                                             |      |      |      |      |   |   | 3 | LSYLLM[147]C[339]LESAVHRGRQVSSEC[330]QGEM[147]LDYR | 1 |

|                                                                                                                                                                                                                        |      |       |      |      |   |   |   |                                          |   |
|------------------------------------------------------------------------------------------------------------------------------------------------------------------------------------------------------------------------|------|-------|------|------|---|---|---|------------------------------------------|---|
| GSTM3_HUMAN (P21266) Glutathione S-transferase Mu 3 (EC 2.5.1.18) (GSTM3-3) (GST class-mu 3) (hGSTM3-3) [MASS=26428]                                                                                                   | 0.00 | 11.61 | 1.75 | 0.00 | 1 | 2 | 2 | M[147]AQWGNKPVC[339]                     | 1 |
|                                                                                                                                                                                                                        |      |       |      |      |   |   | 2 | M[147]PINNKM[147]AQWGNKPVC[330]          | 1 |
| GTR3_HUMAN (P11169) Solute carrier family 2, facilitated glucose transporter member 3 (Glucose transporter type 3, brain) [MASS=53924]                                                                                 | *    | 5.04  | *    | *    | * | 1 | 2 | QILQRLWGTQDVSQDIQEMKDESAR                | 1 |
| GTR8_HUMAN (Q9NY64) Solute carrier family 2, facilitated glucose transporter member 8 (Glucose transporter type 8) (Glucose transporter type X1) [MASS=50793]                                                          | 0.00 | 8.18  | 0.36 | 0.00 | 1 | 2 | 2 | RQEAM[147]AALR                           | 1 |
|                                                                                                                                                                                                                        |      |       |      |      |   |   | 3 | LSLLLC[339]SVPFVAGFAVITAAQDVWM[147]LLGGR | 1 |
| GUAA_HUMAN (P49915) GMP synthase [glutamine-hydrolyzing] (EC 6.3.5.2) (Glutamine amidotransferase) (GMP synthetase) [MASS=76715]                                                                                       | *    | 10.25 | *    | *    | * | 3 | 2 | QADFEAHNILRESGYAGK                       | 1 |
|                                                                                                                                                                                                                        |      |       |      |      |   |   | 3 | ISQM[147]PVILTPLHFDRDPLQKQPSC[339]QR     | 1 |
|                                                                                                                                                                                                                        |      |       |      |      |   |   | 3 | ERVGTSKVLVLLSGGVDSTVC[339]TALLNR         | 1 |
| GUAD_HUMAN (Q9Y2T3) Guanine deaminase (EC 3.5.4.3) (Guanase) (Guanine aminase) (Guanine aminohydrolase) (GAH) (p51-nedasin) [MASS=51003]                                                                               | *    | 11.23 | *    | *    | * | 2 | 3 | MC[339]AAQMPPLAHIFRGTFVHSTWTC[339]PMEVLR | 1 |
|                                                                                                                                                                                                                        |      |       |      |      |   |   | 3 | IGLGTDVAGGYSYSM[147]LDAIRR               | 1 |
| GUC2F_HUMAN (P51841) Retinal guanylyl cyclase 2 precursor (EC 4.6.1.2) (Guanylate cyclase 2F, retinal) (RETGC-2) (Rod outer segment membrane guanylate cyclase 2) (ROS-GC2) (Guanylate cyclase F) (GC-F) [MASS=124821] | *    | 2.35  | *    | *    | * | 1 | 2 | NGSRHAAEIANMSLDILSSVGTFKMR               | 1 |
| H33_HUMAN (P84243) Histone H3.3 [MASS=15197]                                                                                                                                                                           | 0.99 | 23.70 | 1.71 | 0.00 | 1 | 1 | 3 | FQSAAIGALQEASEAYLVGLFEDTNLC[339]AIHAK    | 1 |
| HBB_HUMAN (P68871) Hemoglobin subunit beta (Hemoglobin beta chain) (Beta-globin) [MASS=15867]                                                                                                                          | 0.94 | 8.90  | 0.53 | 0.00 | 1 | 1 | 2 | GTFATLSELHC[330]DK                       | 1 |
| HCDH_HUMAN (Q16836) Short chain 3-hydroxyacyl-CoA dehydrogenase, mitochondrial precursor (EC 1.1.1.35) (HCDH) (Medium and short chain L-3-hydroxyacyl-coenzyme A dehydrogenase) [MASS=34277]                           | 0.00 | 1.91  | 1.24 | 0.00 | 1 | 1 | 2 | HPVSC[339]K                              | 1 |

|                                                                                                                                                                                                                                                                          |      |      |      |      |   |   |   |                                                   |   |
|--------------------------------------------------------------------------------------------------------------------------------------------------------------------------------------------------------------------------------------------------------------------------|------|------|------|------|---|---|---|---------------------------------------------------|---|
| HD_HUMAN (P42858) Huntingtin (Huntington disease protein) (HD protein) [MASS=347857]                                                                                                                                                                                     | 0.00 | 2.19 | 1.01 | 0.00 | 1 | 4 | 2 | SDGC[339]GGSFYTLDSLNLRL                           | 1 |
|                                                                                                                                                                                                                                                                          |      |      |      |      |   |   | 2 | YLVPLLQQQVK                                       | 1 |
|                                                                                                                                                                                                                                                                          |      |      |      |      |   |   | 3 | AALWRFAELAHVLRPQK                                 | 1 |
|                                                                                                                                                                                                                                                                          |      |      |      |      |   |   | 2 | AVTHAIPALQPIVHDLFVLRGTNK                          | 1 |
| HEAT1_HUMAN (Q9H583) HEAT repeat-containing protein 1 (Protein BAP28) [MASS=242369]                                                                                                                                                                                      | 0.00 | 2.99 | 1.08 | 0.00 | 1 | 4 | 3 | QTALYTLKLLC[339]KNFGAENPDPFVPLNTAVK               | 1 |
|                                                                                                                                                                                                                                                                          |      |      |      |      |   |   | 3 | DGLSC[339]LIVLLQR                                 | 1 |
|                                                                                                                                                                                                                                                                          |      |      |      |      |   |   | 2 | EGVDESEFIK                                        | 1 |
|                                                                                                                                                                                                                                                                          |      |      |      |      |   |   | 3 | TSKEGVDESEFIK                                     | 1 |
| HEAT2_HUMAN (Q86Y56) HEAT repeat-containing protein 2 [MASS=93533]                                                                                                                                                                                                       | *    | 2.22 | *    | *    | * | 1 | 2 | SATYC[339]EQLLQHVQAVPATQ                          | 1 |
| HECD1_HUMAN (Q9ULT8) E3 ubiquitin-protein ligase HECTD1 (HECT domain-containing protein 1) (E3 ligase for inhibin receptor) (EULIR) [MASS=289593]                                                                                                                        | *    | 2.91 | *    | *    | * | 4 | 3 | IWEPTYTIMYREMKDSDK                                | 1 |
|                                                                                                                                                                                                                                                                          |      |      |      |      |   |   | 3 | MEPQDSSLEIC[339]VESLSSLLKHEDHQVSDGALR             | 1 |
|                                                                                                                                                                                                                                                                          |      |      |      |      |   |   | 2 | SEFLEKLQR                                         | 1 |
|                                                                                                                                                                                                                                                                          |      |      |      |      |   |   | 2 | HVDLGGGLKPPGYVQR                                  | 1 |
| HELI_HUMAN (Q9UKS7) Zinc finger protein Helios [MASS=59559]                                                                                                                                                                                                              | 0.00 | 5.32 | 0.28 | 0.00 | 1 | 1 | 3 | C[330]HNYLQNVSMEEAAGQVM[147]SHHVPPM[147]EDC[330]K | 1 |
| HELZ_HUMAN (P42694) Probable helicase with zinc-finger domain (EC 3.6.1.-) [MASS=218970]                                                                                                                                                                                 | *    | 3.09 | *    | *    | * | 3 | 2 | KRLSDVNVER                                        | 2 |
|                                                                                                                                                                                                                                                                          |      |      |      |      |   |   | 2 | YQIPLSADQLFTQSVLDKSLTK                            | 1 |
|                                                                                                                                                                                                                                                                          |      |      |      |      |   |   | 3 | QIAESANSSSPQSSAGGKPAMSYASALR                      | 1 |
| HEM1_HUMAN (P13196) 5-aminolevulinate synthase, nonspecific, mitochondrial precursor (EC 2.3.1.37) (5-aminolevulinic acid synthase) (Delta-aminolevulinate synthase) (Delta-ALA synthetase) (ALAS-H) [MASS=70580]                                                        | *    | 2.66 | *    | *    | * | 1 | 2 | PAPRALSTAAVHYQGIK                                 | 1 |
| HGFL_HUMAN (P26927) Hepatocyte growth factor-like protein precursor (Macrophage stimulatory protein) (MSP) (Macrophage-stimulating protein) [Contains: Hepatocyte growth factor-like protein alpha chain; Hepatocyte growth factor-like protein beta chain] [MASS=80380] | *    | 2.81 | *    | *    | * | 1 | 3 | WPAVFTRVSVFVDWIHKVMR                              | 1 |
| HGF_HUMAN (P14210) Hepatocyte growth factor precursor (Scatter factor) (SF) (Hepatopoeitin A) [Contains: Hepatocyte growth factor alpha chain; Hepatocyte growth factor beta chain] [MASS=83133]                                                                         | 0.00 | 3.57 | 2.72 | 0.00 | 1 | 1 | 3 | C[339]EGDTPPTIVNLDHPVISC[339]AKTKQLR              | 1 |

|                                                                                                                                                                                                    |      |       |      |      |   |   |                  |                                                                                               |                  |
|----------------------------------------------------------------------------------------------------------------------------------------------------------------------------------------------------|------|-------|------|------|---|---|------------------|-----------------------------------------------------------------------------------------------|------------------|
| HIC1_HUMAN (Q14526) Hypermethylated in cancer 1 protein (Hic-1) (Zinc finger and BTB domain-containing protein 29) [MASS=76467]                                                                    | *    | 1.77  | *    | *    | * | 1 | 2                | LTAEQLSLKQQDK                                                                                 | 1                |
| HINT1_HUMAN (P49773) Histidine triad nucleotide-binding protein 1 (Adenosine 5'-monophosphoramidase) (Protein kinase C inhibitor 1) (Protein kinase C-interacting protein 1) (PKCI-1) [MASS=13671] | 0.89 | 27.20 | 1.77 | 0.00 | 1 | 1 | 3                | HISQISVAEDDDESLLGHLM[147]IVGKKC[339]AADLGLNK                                                  | 1                |
| HIP1_HUMAN (O00291) Huntingtin-interacting protein 1 (HIP-1) [MASS=115442]                                                                                                                         | *    | 5.24  | *    | *    | * | 3 | 3<br>2<br>2      | AGDTGVKLEVNERILGC[330]C[330]TSLMQAIQVLIVASK<br>DHLIERLYR<br>NAEVTKQVSM[147]AR                 | 1<br>1<br>1      |
| HMCN1_HUMAN (Q96RW7) Hemicentin-1 precursor (Fibulin-6) (FIBL-6) [MASS=613386]                                                                                                                     | 0.00 | 0.39  | *    | *    | * | 2 | 2<br>2           | EFEVTVHVPPTIK<br>GVDIEISHR                                                                    | 1<br>1           |
| HMCS1_HUMAN (Q01581) Hydroxymethylglutaryl-CoA synthase, cytoplasmic (EC 2.3.3.10) (HMG-CoA synthase) (3-hydroxy-3-methylglutaryl coenzyme A synthase) [MASS=57293]                                | *    | 4.23  | *    | *    | * | 1 | 3                | NSIYSGLEAFGDVKLEDTYFDR                                                                        | 1                |
| HPLN2_HUMAN (Q9GZV7) Hyaluronan and proteoglycan link protein 2 precursor (Brain link protein 1) [MASS=37775]                                                                                      | 0.27 | 3.24  | 0.38 | 0.30 | 2 | 1 | 2                | LTLSEAHAAC[330]JR                                                                             | 2                |
| HPRT_HUMAN (P00492) Hypoxanthine-guanine phosphoribosyltransferase (EC 2.4.2.8) (HGPRT) (HGPRTase) [MASS=24448]                                                                                    | 1.00 | 19.82 | 1.09 | 0.01 | 2 | 2 | 2<br>3           | DLNHVC[330]VISETGK<br>SPGVVISDDEPGYDLDFC[330]IPNHYAEDLER                                      | 1<br>1           |
| HRX_HUMAN (Q03164) Zinc finger protein HRX (ALL-1) (Trithorax-like protein) [MASS=431748]                                                                                                          | 0.00 | 1.64  | 1.91 | 0.00 | 1 | 4 | 3<br>2<br>2<br>2 | TLC[339]LSTPSSSTVK<br>GWDAQWSHDFSLC[330]HDC[339]AK<br>IFESVTLPSNRTSAGTSSSGVSNR<br>FKTGKQLQIGR | 1<br>1<br>1<br>1 |
| HS105_HUMAN (Q92598) Heat-shock protein 105 kDa (Heat shock 110 kDa protein) (Antigen NY-CO-25) [MASS=96864]                                                                                       | *    | 3.15  | *    | *    | * | 1 | 3                | ETAENSLKPKVTDC[339]VISVPSFFTDAER                                                              | 1                |
| HS90A_HUMAN (P07900) Heat shock protein HSP 90-alpha (HSP 86) (NY-REN-38 antigen) [MASS=84528]                                                                                                     | *    | 1.92  | *    | *    | * | 1 | 2                | PEIEDVGSDEEEEK                                                                                | 1                |
| HSF2B_HUMAN (O75031) Heat shock factor 2-binding protein [MASS=37644]                                                                                                                              | 0.00 | 3.59  | 0.91 | 0.00 | 1 | 1 | 2                | MGEAGAAEEAC[339]JR                                                                            | 1                |

|                                                                                                                                                                                                         |      |       |      |      |   |   |   |                                        |   |
|---------------------------------------------------------------------------------------------------------------------------------------------------------------------------------------------------------|------|-------|------|------|---|---|---|----------------------------------------|---|
| HSP71_HUMAN (P08107) Heat shock 70 kDa protein 1 (HSP70.1) (HSP70-1/HSP70-2) [MASS=70052]                                                                                                               | *    | 5.15  | *    | *    | * | 2 | 3 | FEELC[339]SDLFRSTLEPVEK                | 1 |
|                                                                                                                                                                                                         |      |       |      |      |   |   | 2 | LSKEEIERMVQEAEK                        | 1 |
| HSPB6_HUMAN (O14558) Heat-shock protein beta-6 (HspB6) (Heat-shock 20 kDa-like protein p20) [MASS=17135]                                                                                                | 0.00 | 15.00 | 6.42 | 0.00 | 1 | 1 | 2 | FGEGLLAEELAALC[339]PTTLAPYYLR          | 1 |
| HSPB9_HUMAN (Q9BQS6) Heat-shock protein beta-9 (HspB9) [MASS=17486]                                                                                                                                     | 0.00 | 17.61 | 1.27 | 0.00 | 1 | 1 | 3 | VHRKMLPSNLSPTAMTC[339]C[339]LTPSGQLWVR | 1 |
|                                                                                                                                                                                                         |      |       |      |      |   |   | 2 | HTEKHASGGSTVHIHPQAAPVVC[339]R          | 1 |
|                                                                                                                                                                                                         |      |       |      |      |   |   | 3 | VLQEGLLQLDSILSSLEPLHRPIESPGGSVLLR      | 1 |
| HUWE1_HUMAN (Q7Z6Z7) HECT, UBA and WWE domain-containing protein 1 (EC 6.3.2.-) (E3 ubiquitin protein ligase URE-B1) (Mcl-1 ubiquitin ligase E3) (Mule) (ARF-binding protein 1) (ARF-BP1) [MASS=481888] | *    | 4.05  | *    | *    | * | 7 | 3 | TVSEWISQM[147]ATLPQASNLATRILLTLLFEELK  | 1 |
|                                                                                                                                                                                                         |      |       |      |      |   |   | 3 | REESPM[147]DVDQPSPSAQDTQSIASDGTPQGEK   | 1 |
|                                                                                                                                                                                                         |      |       |      |      |   |   | 2 | EVIYDMLNALAAYHAPEEADK                  | 1 |
|                                                                                                                                                                                                         |      |       |      |      |   |   | 2 | LFKVLLSPDYLPAMR                        | 1 |
|                                                                                                                                                                                                         |      |       |      |      |   |   | 2 | M[147]LLLAVLNFTALLIEYSFSR              | 1 |
| HV3G_HUMAN (P01768) Ig heavy chain V-III region CAM [MASS=13668]                                                                                                                                        | 0.00 | 15.57 | 0.36 | 0.00 | 1 | 1 | 2 | LSC[339]AASGFTFSNYAM[147]HWVR          | 1 |
| HXB3_HUMAN (P14651) Homeobox protein Hox-B3 (Hox-2G) (Hox-2.7) [MASS=44344]                                                                                                                             | 0.00 | 8.58  | 0.51 | 0.00 | 1 | 3 | 2 | AHQNAYALPSNYQPPLK                      | 1 |
|                                                                                                                                                                                                         |      |       |      |      |   |   | 2 | GC[330]GAPQK                           | 1 |
|                                                                                                                                                                                                         |      |       |      |      |   |   | 3 | RVEMANLLNLSER                          | 1 |
| HXB6_HUMAN (P17509) Homeobox protein Hox-B6 (Hox-2B) (Hox-2.2) (HU-2) [MASS=25427]                                                                                                                      | 0.00 | 6.70  | 1.69 | 0.00 | 1 | 1 | 3 | MNSC[339]NSSSFGPSGRR                   | 1 |
| HXD12_HUMAN (P35452) Homeobox protein Hox-D12 (Hox-4H) [MASS=29535]                                                                                                                                     | 0.00 | 14.91 | 0.94 | 0.00 | 1 | 2 | 2 | C[330]PC[330]SPGRPAVGGGPGEAR           | 1 |
|                                                                                                                                                                                                         |      |       |      |      |   |   | 2 | DDTKGPLNLM[147]TVQAAGVASC[330]LR       | 1 |

|                                                                                                                                                                        |      |       |      |      |    |    |  |   |                                     |   |
|------------------------------------------------------------------------------------------------------------------------------------------------------------------------|------|-------|------|------|----|----|--|---|-------------------------------------|---|
|                                                                                                                                                                        |      |       |      |      |    |    |  | 2 | AAQLC[330]GAGM[147]AAVVDK           | 1 |
|                                                                                                                                                                        |      |       |      |      |    |    |  | 2 | AAQLC[339]GAGM[147]AAVVDKIR         | 1 |
|                                                                                                                                                                        |      |       |      |      |    |    |  | 2 | MISGMYLGEIVR                        | 1 |
|                                                                                                                                                                        |      |       |      |      |    |    |  | 3 | LGVEPSDDDC[339]VSVQHVC[330]TIVSFR   | 1 |
|                                                                                                                                                                        |      |       |      |      |    |    |  | 3 | LGVEPSDDDC[330]VSVQHVC[330]TIVSFR   | 1 |
|                                                                                                                                                                        |      |       |      |      |    |    |  | 2 | C[339]NVSFLLEDGSGK                  | 2 |
|                                                                                                                                                                        |      |       |      |      |    |    |  | 2 | LPVGFTFSFPC[330]QQSK                | 1 |
|                                                                                                                                                                        |      |       |      |      |    |    |  | 2 | MIAAQLLAYFTELKDDQVK                 | 1 |
|                                                                                                                                                                        |      |       |      |      |    |    |  | 3 | ATDC[339]VGHDVVTLLR                 | 1 |
|                                                                                                                                                                        |      |       |      |      |    |    |  | 3 | LGVEPSDDDC[339]VSVQHVC[339]TIVSFR   | 1 |
|                                                                                                                                                                        |      |       |      |      |    |    |  | 2 | AILQQLGLNSTC[339]DDSILVK            | 1 |
|                                                                                                                                                                        |      |       |      |      |    |    |  | 2 | ATDC[339]VGHDVVTLLR                 | 2 |
| HXK1_HUMAN (P19367) Hexokinase-1 (EC 2.7.1.1) (Hexokinase type I) (HK I) (Brain form hexokinase) [MASS=102484]                                                         | 1.00 | 18.87 | 1.31 | 0.06 | 22 | 11 |  | 2 | AAQLC[339]GAGM[147]AAVVDK           | 2 |
|                                                                                                                                                                        |      |       |      |      |    |    |  | 2 | KLPVGFTFSFPC[339]QQSK               | 2 |
|                                                                                                                                                                        |      |       |      |      |    |    |  | 2 | KLPVGFTFSFPC[330]QQSK               | 2 |
|                                                                                                                                                                        |      |       |      |      |    |    |  | 2 | C[330]NVSFLLEDGSGK                  | 1 |
|                                                                                                                                                                        |      |       |      |      |    |    |  | 2 | ATDC[330]VGHDVVTLLR                 | 1 |
|                                                                                                                                                                        |      |       |      |      |    |    |  | 2 | LPVGFTFSFPC[339]QQSK                | 2 |
|                                                                                                                                                                        |      |       |      |      |    |    |  | 2 | TVC[330]GVVSR                       | 1 |
|                                                                                                                                                                        |      |       |      |      |    |    |  | 2 | DGLAQLM[147]C[339]ELK               | 1 |
|                                                                                                                                                                        |      |       |      |      |    |    |  | 3 | GHIEDC[330]GHWTQMDKPTEVNQILIKWLDSAR | 1 |
| HYES_HUMAN (P34913) Epoxide hydrolase 2 (EC 3.3.2.3) (Soluble epoxide hydrolase) (SEH) (Epoxide hydratase) (Cytosolic epoxide hydrolase) (CEH) [MASS=62615]            | 0.00 | 7.57  | 1.31 | 0.00 | 1  | 2  |  | 3 | QDEEKPLHALLHGRGVC[339]LNEK          | 1 |
|                                                                                                                                                                        |      |       |      |      |    |    |  | 2 | KLTQSKFVGAENTAHPR                   | 1 |
|                                                                                                                                                                        |      |       |      |      |    |    |  | 2 | PLHALLHGR                           | 1 |
| IBP5_HUMAN (P24593) Insulin-like growth factor-binding protein 5 precursor (IGFBP-5) (IBP-5) (IGF-binding protein 5) [MASS=30570]                                      | 0.00 | 17.65 | 2.11 | 0.00 | 1  | 3  |  | 3 | EDAGTYHC[330]VATNAHGTDSCR           | 1 |
|                                                                                                                                                                        |      |       |      |      |    |    |  | 2 | GNPEPSVHC[330]AR                    | 1 |
| ICAM5_HUMAN (Q9UMF0) Intercellular adhesion molecule 5 precursor (ICAM-5) (Telencephalin) [MASS=97330]                                                                 | 1.00 | 3.25  | 0.53 | 0.08 | 2  | 2  |  | 2 | EVAESC[339]KDIK                     | 1 |
|                                                                                                                                                                        |      |       |      |      |    |    |  | 2 | C[339]REVAESC[339]K                 | 1 |
|                                                                                                                                                                        |      |       |      |      |    |    |  | 2 | C[330]REVAESC[330]K                 | 1 |
| IDH3A_HUMAN (P50213) Isocitrate dehydrogenase [NAD] subunit alpha, mitochondrial precursor (EC 1.1.1.41) (Isocitric dehydrogenase) (NAD(+)-specific ICDH) [MASS=39591] | 0.44 | 5.19  | 1.37 | 0.05 | 3  | 2  |  |   |                                     |   |



|                                                                                                                                                                                                     |      |       |      |      |   |   |                                                                                                                                                                 |                            |   |
|-----------------------------------------------------------------------------------------------------------------------------------------------------------------------------------------------------|------|-------|------|------|---|---|-----------------------------------------------------------------------------------------------------------------------------------------------------------------|----------------------------|---|
| IDH3G_HUMAN (P51553) Isocitrate dehydrogenase [NAD] subunit gamma, mitochondrial precursor (EC 1.1.1.41) (Isocitric dehydrogenase) (NAD(+)-specific ICDH) [MASS=42794]                              | 0.95 | 3.31  | 1.37 | 0.00 | 1 | 1 | 2                                                                                                                                                               | TSLDLYANVIHC[330]JK        | 1 |
| IDHP_HUMAN (P48735) Isocitrate dehydrogenase [NADP], mitochondrial precursor (EC 1.1.1.42) (Oxalosuccinate decarboxylase) (IDH) (NADP(+)-specific ICDH) (IDP) (ICD-M) [MASS=50909]                  | 1.00 | 12.61 | 1.32 | 0.05 | 2 | 4 | 2 C[339]ATITPDEARVEEFK<br>2 C[330]ATITPDEAR<br>2 DLAGC[330]IHGLSNVK<br>2 ATDFVADRAGTFKM[147]VFTPK                                                               | 1<br>1<br>1<br>1           |   |
| IDLC_HUMAN (O14645) Axonemal dynein light intermediate polypeptide 1 (Inner dynein arm light chain, axonemal) (hp28) [MASS=29662]                                                                   | *    | 3.49  | *    | *    | * | 1 | 2                                                                                                                                                               | YDTPVLVSR                  | 1 |
| IF140_HUMAN (Q96RY7) Intraflagellar transport 140 homolog (WD and tetratricopeptide repeats protein 2) [MASS=165192]                                                                                | *    | 2.39  | *    | *    | * | 2 | 3 LGVLLLWRLDQRGR<br>3 WALQTPTELQGNITQIQWGSR                                                                                                                     | 1<br>1                     |   |
| IF1AH_HUMAN (O75642) Putative eukaryotic translation initiation factor 1A (eIF-1A) (eIF-4C) [MASS=16329]                                                                                            | 0.31 | 7.69  | 4.48 | 0.00 | 1 | 1 | 2                                                                                                                                                               | LEAMC[339]FDGVKR           | 1 |
| IF4G1_HUMAN (Q04637) Eukaryotic translation initiation factor 4 gamma 1 (eIF-4-gamma 1) (eIF-4G1) (eIF-4G 1) (p220) [MASS=175534]                                                                   | 0.00 | 1.88  | 0.23 | 0.00 | 1 | 2 | 3 M[147]LTEAIMHDC[330]VVK<br>3 FMLQDVLDLRGSNWVPR                                                                                                                | 1<br>2                     |   |
| IF4G3_HUMAN (O43432) Eukaryotic translation initiation factor 4 gamma 3 (eIF-4-gamma 3) (eIF-4G 3) (eIF4G 3) (eIF-4-gamma II) (eIF4GII) [MASS=176651]                                               | 0.00 | 2.97  | *    | *    | * | 3 | 2 PGNTVNFR<br>2 RSIGNIKFIGELFK<br>3 GVIDLVFEKAIDEPSFSVAYANM[147]C[339]R                                                                                         | 1<br>1<br>1                |   |
| IGS4B_HUMAN (Q8N126) Immunoglobulin superfamily member 4B precursor (Nectin-like protein 1) (TSLC1-like protein 1) (Synaptic cell adhesion molecule 3) (Brain immunoglobulin receptor) [MASS=43300] | 1.00 | 16.08 | 0.42 | 0.59 | 5 | 4 | 2 DHEDSSLQWSNPAQQTLYFGEK<br>2 EKDTATLNC[330]QSSGSKPAAR<br>3 EKDTATLNC[339]QSSGSKPAAR<br>2 EKDTATLNC[330]QSSGSK<br>2 LLLHC[339]EGR<br>3 EKDTATLNC[330]QSSGSKPAAR | 1<br>2<br>1<br>1<br>1<br>1 |   |

|                                                                                                                                                                                                                                                                              |      |       |      |      |   |   |   |                                      |   |
|------------------------------------------------------------------------------------------------------------------------------------------------------------------------------------------------------------------------------------------------------------------------------|------|-------|------|------|---|---|---|--------------------------------------|---|
| IKKA_HUMAN (O15111) Inhibitor of nuclear factor kappa-B kinase alpha subunit (EC 2.7.11.10) (I kappa-B kinase alpha) (IκBKA) (IKK-alpha) (IKK-A) (IκappaB kinase) (I-kappa-B kinase 1) (IKK1) (Conserved helix-loop-helix ubiquitous kinase) (Nuclear factor N [MASS=84653]) | 0.00 | 4.03  | 3.30 | 0.00 | 1 | 2 | 2 | IAIKSC[339]R                         | 1 |
|                                                                                                                                                                                                                                                                              |      |       |      |      |   |   | 3 | C[339]FVLM DHILNLKIVHILNMTSAK        | 1 |
|                                                                                                                                                                                                                                                                              |      |       |      |      |   |   |   |                                      |   |
| IL1R1_HUMAN (P14778) Interleukin-1 receptor type I precursor (IL-1R-1) (IL-1RT1) (IL-1R-alpha) (p80) (CD121a antigen) [MASS=65402]                                                                                                                                           | 0.00 | 7.56  | 1.92 | 0.00 | 1 | 2 | 2 | LPVAGDGGLVC[339]PYM[147]EFFK         | 1 |
|                                                                                                                                                                                                                                                                              |      |       |      |      |   |   | 3 | DSC[339]YDFLPIKASDGKTYDAYILYPK       | 1 |
|                                                                                                                                                                                                                                                                              |      |       |      |      |   |   |   |                                      |   |
| IL8_HUMAN (P10145) Interleukin-8 precursor (IL-8) (CXCL8) (Monocyte-derived neutrophil chemotactic factor) (MDNCF) (T-cell chemotactic factor) (Neutrophil-activating protein 1) (NAP-1) (Protein 3-10C) (Granulocyte chemotactic protein 1) (GCP-1) (Monocyte [MASS=11098]) | 0.00 | 27.27 | 1.11 | 0.00 | 1 | 1 | 3 | MTSKLAVALLAFLISAALC[339]EGAVLPR      | 1 |
|                                                                                                                                                                                                                                                                              |      |       |      |      |   |   |   |                                      |   |
|                                                                                                                                                                                                                                                                              |      |       |      |      |   |   |   |                                      |   |
| IMA7_HUMAN (O60684) Importin alpha-7 subunit (Karyopherin alpha-6) [MASS=60029]                                                                                                                                                                                              | 0.99 | 3.36  | 0.66 | 0.00 | 1 | 1 | 2 | DYVLNC[330]SILNPLLLTLTK              | 1 |
|                                                                                                                                                                                                                                                                              |      |       |      |      |   |   |   |                                      |   |
|                                                                                                                                                                                                                                                                              |      |       |      |      |   |   |   |                                      |   |
| IMB1_HUMAN (Q14974) Importin beta-1 subunit (Karyopherin beta-1 subunit) (Nuclear factor P97) (Importin 90) [MASS=97170]                                                                                                                                                     | *    | 2.97  | *    | *    | * | 1 | 3 | IM[147]SLYYQYMETYMGPALFAITIEAM[147]K | 1 |
|                                                                                                                                                                                                                                                                              |      |       |      |      |   |   | 3 | IMSLYYQYMETYMGPALFAITIEAM[147]K      | 1 |
|                                                                                                                                                                                                                                                                              |      |       |      |      |   |   |   |                                      |   |
| IMB3_HUMAN (O00410) Importin beta-3 (Karyopherin beta-3) (Ran-binding protein 5) (RanBP5) [MASS=123498]                                                                                                                                                                      | 0.00 | 1.46  | 0.98 | 0.00 | 1 | 1 | 2 | TIEC[339]ISLIGLAVGKEK                | 1 |
|                                                                                                                                                                                                                                                                              |      |       |      |      |   |   |   |                                      |   |
|                                                                                                                                                                                                                                                                              |      |       |      |      |   |   |   |                                      |   |
| IMMT_HUMAN (Q16891) Mitochondrial inner membrane protein (Mitofilin) (p87/89) (Proliferation-inducing gene 4 protein) [MASS=83677]                                                                                                                                           | 1.00 | 2.51  | 0.60 | 0.03 | 2 | 1 | 2 | LLSYASYC[330]IEHGDLELAAK             | 1 |
|                                                                                                                                                                                                                                                                              |      |       |      |      |   |   | 2 | LLSYASYC[339]IEHGDLELAAK             | 1 |
|                                                                                                                                                                                                                                                                              |      |       |      |      |   |   |   |                                      |   |
| INADL_HUMAN (Q8NI35) InaD-like protein (Inadl protein) (hINADL) (Pals1-associated tight junction protein) (Protein associated to tight junctions) [MASS=196385]                                                                                                              | *    | 7.16  | *    | *    | * | 6 | 3 | LWAGDQILEVNGVDLRNSSHEEAITALRQTPQK    | 1 |
|                                                                                                                                                                                                                                                                              |      |       |      |      |   |   | 2 | TSSSTSPLEPPSDRGTVVEPLK               | 1 |
|                                                                                                                                                                                                                                                                              |      |       |      |      |   |   | 2 | REAVSFLKEVPPPFTLVC[330]C[330]R       | 1 |
|                                                                                                                                                                                                                                                                              |      |       |      |      |   |   | 2 | NSGTDM[147]EPRTVEINR                 | 1 |
|                                                                                                                                                                                                                                                                              |      |       |      |      |   |   | 2 | NC[330]GNSVRMLVAR                    | 1 |
|                                                                                                                                                                                                                                                                              |      |       |      |      |   |   | 3 | TSLDLGMIPNDVQGPSLLIDL PVVAQR         | 1 |

|                                                                                                                                                                                                                     |      |       |      |      |   |   |   |                                              |   |
|---------------------------------------------------------------------------------------------------------------------------------------------------------------------------------------------------------------------|------|-------|------|------|---|---|---|----------------------------------------------|---|
| IP3KA_HUMAN (P23677) Inositol-trisphosphate 3-kinase A (EC 2.7.1.127) (Inositol 1,4,5-trisphosphate 3-kinase A) (IP3K A) (IP3 3-kinase A) [MASS=51008]                                                              | *    | 11.28 | *    | *    | * | 3 | 2 | KMLAVDPEAPTEEEHAQR                           | 1 |
|                                                                                                                                                                                                                     |      |       |      |      |   |   | 2 | TM[147]VNLPVISPFKK                           | 1 |
|                                                                                                                                                                                                                     |      |       |      |      |   |   | 2 | SREQVLRVFEEFVQGDEEVLR                        | 1 |
| IP3KB_HUMAN (P27987) Inositol-trisphosphate 3-kinase B (EC 2.7.1.127) (Inositol 1,4,5-trisphosphate 3-kinase B) (IP3K B) (IP3 3-kinase B) (IP3K-B) [MASS=102376]                                                    | *    | 4.76  | *    | *    | * | 3 | 2 | SGGGPGPSGSETPPPPRR                           | 1 |
|                                                                                                                                                                                                                     |      |       |      |      |   |   | 2 | IKNMVHWSPFVMSFKK                             | 1 |
|                                                                                                                                                                                                                     |      |       |      |      |   |   | 2 | HC[339]ESEQRC[339]LDR                        | 1 |
| IP6K3_HUMAN (Q96PC2) Inositol hexaphosphate kinase 3 (EC 2.7.4.21) (InsP6 kinase 3) (Inositol hexakisphosphate kinase 3) [MASS=46431]                                                                               | 0.00 | 5.85  | 2.92 | 0.00 | 1 | 1 | 3 | C[339]AQSTSAC[339]LGVRIC[339]GM[147]QVYQTDKK | 1 |
| IPO7_HUMAN (O95373) Importin-7 (Imp7) (Ran-binding protein 7) (RanBP7) [MASS=119516]                                                                                                                                | 0.00 | 1.64  | 1.71 | 0.00 | 1 | 1 | 2 | KVLTGVAGEDAEC[339]HAAK                       | 1 |
| IQEC2_HUMAN (Q5JU85) IQ motif and Sec7 domain-containing protein 2 [MASS=161735]                                                                                                                                    | 0.00 | 2.17  | 1.07 | 0.00 | 1 | 2 | 2 | PASLDEGAM[147]AGARSHR                        | 1 |
|                                                                                                                                                                                                                     |      |       |      |      |   |   | 3 | DVAQC[330]HLHHENPALGR                        | 1 |
| IQEC3_HUMAN (Q9UYP2) IQ motif and Sec7 domain-containing protein 3 [MASS=127596]                                                                                                                                    | *    | 1.95  | *    | *    | * | 2 | 2 | YGGHLVSRR                                    | 1 |
|                                                                                                                                                                                                                     |      |       |      |      |   |   | 3 | GPGSRAHTPQSPHK                               | 1 |
| IRAK2_HUMAN (O43187) Interleukin-1 receptor-associated kinase-like 2 (IRAK-2) [MASS=65270]                                                                                                                          | *    | 2.37  | *    | *    | * | 1 | 3 | LAHPM[147]AHLC[339]PVNKR                     | 1 |
| ISK4_HUMAN (O60575) Serine protease inhibitor Kazal-type 4 precursor (Peptide PEC-60 homolog) [MASS=9454]                                                                                                           | 0.00 | 18.60 | *    | *    | * | 1 | 2 | QWVIALALAALLVVDR                             | 1 |
| ITA1_HUMAN (P56199) Integrin alpha-1 (Laminin and collagen receptor) (VLA-1) (CD49a antigen) [MASS=127837]                                                                                                          | 0.27 | 1.65  | 0.19 | 0.00 | 1 | 1 | 3 | DSC[330]ESNHNITC[330]KVGYPFLR                | 1 |
| ITA5_HUMAN (P08648) Integrin alpha-5 precursor (Fibronectin receptor subunit alpha) (Integrin alpha-F) (VLA-5) (CD49e antigen) [Contains: Integrin alpha-5 heavy chain; Integrin alpha-5 light chain] [MASS=114536] | *    | 1.62  | *    | *    | * | 1 | 3 | RPPLLPLLLLLPPPPR                             | 1 |

|                                                                                                                                                                                                                                                                 |      |       |      |      |   |   |   |                                                |   |
|-----------------------------------------------------------------------------------------------------------------------------------------------------------------------------------------------------------------------------------------------------------------|------|-------|------|------|---|---|---|------------------------------------------------|---|
| ITAX_HUMAN (P20702) Integrin alpha-X precursor (Leukocyte adhesion glycoprotein p150,95 alpha chain) (Leukocyte adhesion receptor p150,95) (Leu M5) (CD11c antigen) [MASS=127886]                                                                               | *    | 3.70  | *    | *    | * | 2 | 3 | EQVWSEQTLVQSNIC[339]LYIDKRSK                   | 1 |
|                                                                                                                                                                                                                                                                 |      |       |      |      |   |   | 2 | DLQSSVTLDLALDPGRLSR                            | 1 |
| ITB7_HUMAN (P26010) Integrin beta-7 precursor [MASS=86903]                                                                                                                                                                                                      | 0.28 | 4.14  | 0.49 | 0.00 | 1 | 2 | 2 | GQC[339]NHVR                                   | 1 |
|                                                                                                                                                                                                                                                                 |      |       |      |      |   |   | 3 | AEGYPVDLYYLM[147]DLSYSM[147]KDDLVR             | 1 |
| ITB8_HUMAN (P26012) Integrin beta-8 precursor [MASS=85632]                                                                                                                                                                                                      | *    | 5.85  | *    | *    | * | 3 | 2 | DFRLGFGSYVDK                                   | 1 |
|                                                                                                                                                                                                                                                                 |      |       |      |      |   |   | 3 | KPGMEGC[339]RNVTSNDEVLFNVTVMK                  | 1 |
|                                                                                                                                                                                                                                                                 |      |       |      |      |   |   | 2 | KC[339]DVTGGK                                  | 1 |
| ITBP1_HUMAN (O14713) Integrin beta-1-binding protein 1 (Integrin cytoplasmic domain-associated protein 1) (ICAP-1) [MASS=21782]                                                                                                                                 | 0.00 | 16.00 | 0.24 | 0.00 | 1 | 1 | 3 | VSTSDQYDVLHRHALYLIIRMVC[330]YDDGLGAGK          | 1 |
| ITIH1_HUMAN (P19827) Inter-alpha-trypsin inhibitor heavy chain H1 precursor (ITI heavy chain H1) (Inter-alpha-inhibitor heavy chain 1) (Inter-alpha-trypsin inhibitor complex component III) (Serum-derived hyaluronan-associated protein) (SHAP) [MASS=101388] | *    | 3.51  | *    | *    | * | 2 | 3 | PSEDSPPLEM[147]LGPR                            | 1 |
|                                                                                                                                                                                                                                                                 |      |       |      |      |   |   | 2 | QYYEGSEIVVAGRIADNK                             | 1 |
|                                                                                                                                                                                                                                                                 |      |       |      |      |   |   | 2 | PSEDSPPLEM[147]LGPR                            | 1 |
| ITLN2_HUMAN (Q8WWU7) Intelectin-2 precursor (Endothelial lectin HL-2) [MASS=36211]                                                                                                                                                                              | *    | 9.54  | *    | *    | * | 1 | 3 | TMTRLC[330]FLLFFSVATSGC[330]SAAAASSLEM[147]LSR | 1 |
| IVD_HUMAN (P26440) Isovaleryl-CoA dehydrogenase, mitochondrial precursor (EC 1.3.99.10) (IVD) [MASS=46319]                                                                                                                                                      | 0.84 | 2.36  | 2.36 | 0.00 | 1 | 1 | 2 | AC[339]DEGHC[339]TAK                           | 1 |
| JAD1A_HUMAN (P29375) Jumonji/ARID domain-containing protein 1A (Retinoblastoma-binding protein 2) (RBBP-2) [MASS=195815]                                                                                                                                        | *    | 5.46  | *    | *    | * | 5 | 2 | VC[330]VGVSPEMAENEDYIC[330]INC[339]AK          | 1 |
|                                                                                                                                                                                                                                                                 |      |       |      |      |   |   | 2 | WLDEVRLTSLDPQQVTLDMK                           | 1 |
|                                                                                                                                                                                                                                                                 |      |       |      |      |   |   | 3 | SC[339]SQVFFGKGSSTPRK                          | 1 |
|                                                                                                                                                                                                                                                                 |      |       |      |      |   |   | 2 | LQMLIDM[147]GSSLYVELPELPRLK                    | 1 |
|                                                                                                                                                                                                                                                                 |      |       |      |      |   |   | 2 | SSSQKKGSSWQAK                                  | 1 |
| JAG1_HUMAN (P78504) Jagged-1 precursor (Jagged1) (hJ1) (CD339 antigen) [MASS=133798]                                                                                                                                                                            | 0.00 | 2.63  | *    | *    | * | 2 | 2 | TC[339]M[147]EGWMGPEC[339]NRAIC[339]R          | 1 |
|                                                                                                                                                                                                                                                                 |      |       |      |      |   |   | 2 | RDGNSSLIAAAVEVR                                | 1 |
| JHD1A_HUMAN (Q9Y2K7) JmjC domain-containing histone demethylation protein 1A (EC 1.14.11.-) (F-box/LRR-repeat protein 11) (F-box and leucine-rich repeat protein 11) (F-box protein FBL7) (F-box protein Lilina) [MASS=132792]                                  | *    | 4.13  | *    | *    | * | 2 | 3 | LENMVQRPSTVDFIDWVDNMWPR                        | 1 |
|                                                                                                                                                                                                                                                                 |      |       |      |      |   |   | 3 | YNANFVTFMEGKDFNVEYIQRGGLR                      | 1 |

|                                                                                                                                                                                                                           |      |      |      |      |   |   |   |                                         |   |
|---------------------------------------------------------------------------------------------------------------------------------------------------------------------------------------------------------------------------|------|------|------|------|---|---|---|-----------------------------------------|---|
| K0056_HUMAN (P42695) Protein KIAA0056<br>[MASS=168890]                                                                                                                                                                    | *    | 1.34 | *    | *    | * | 1 | 2 | EKIEGRSQGNDILC[330]LSLPDK               | 1 |
|                                                                                                                                                                                                                           |      |      |      |      |   |   | 2 | NLGMVC[339]R                            | 7 |
| K0196_HUMAN (Q12768) Protein KIAA0196<br>[MASS=134286]                                                                                                                                                                    | 0.00 | 1.47 | 2.66 | 0.00 | 1 | 2 |   |                                         |   |
|                                                                                                                                                                                                                           |      |      |      |      |   |   | 2 | EEM[147]VLDNIPK                         | 1 |
| K0232_HUMAN (Q92628) Protein KIAA0232<br>(Fragment) [MASS=155619]                                                                                                                                                         | *    | 1.36 | *    | *    | * | 1 | 3 | C[339]SDLTLEEM[147]KKQAAVQC[330]LR      | 2 |
| K0427_HUMAN (O43310) Protein KIAA0427<br>[MASS=67586]                                                                                                                                                                     | 0.00 | 5.35 | 1.87 | 0.00 | 1 | 2 | 2 | GRAPPQQNGSK                             | 1 |
|                                                                                                                                                                                                                           |      |      |      |      |   |   | 2 | EGC[339]GKGGLEDDGGINLNDIEK              | 1 |
| K0552_HUMAN (O60299) Protein KIAA0552<br>[MASS=71790]                                                                                                                                                                     | *    | 2.67 | *    | *    | * | 1 | 3 | SLEQSEAAVAQVLEERQK                      | 1 |
| K0690_HUMAN (Q5JTH9) Protein KIAA0690<br>[MASS=143701]                                                                                                                                                                    | *    | 1.23 | *    | *    | * | 1 | 3 | VAQRVLATQPGPGRGR                        | 1 |
| K1024_HUMAN (Q9UPX6) UPF0258 protein<br>KIAA1024 [MASS=102992]                                                                                                                                                            | *    | 4.48 | *    | *    | * | 2 | 2 | HSDDDSEIVSDDISDIFR                      | 1 |
|                                                                                                                                                                                                                           |      |      |      |      |   |   | 2 | VSVQIDLNSLTSEGPSDDASPR                  | 1 |
| K1196_HUMAN (Q96KM6) Zinc finger protein<br>KIAA1196 [MASS=97263]                                                                                                                                                         | *    | 4.48 | *    | *    | * | 2 | 1 | TPSGRVR                                 | 1 |
|                                                                                                                                                                                                                           |      |      |      |      |   |   | 3 | MGMPVVRGGQTVPGQAPLC[330]FDPGSPASDKTEGK  | 1 |
| K2C5_HUMAN (P13647) Keratin, type II<br>cytoskeletal 5 (Cytokeratin-5) (CK-5) (Keratin-5)<br>(K5) (58 kDa cytokeratin) [MASS=62447]                                                                                       | 0.00 | 5.76 | 2.16 | 0.00 | 1 | 1 | 3 | TSFTSVSRSGGGGGGGFGRVSLAGAC[339]GVGGYGSR | 1 |
| K6PF_HUMAN (P08237) 6-<br>phosphofructokinase, muscle type (EC<br>2.7.1.11) (Phosphofructokinase 1)<br>(Phosphohexokinase) (Phosphofructo-1-kinase<br>isozyme A) (PFK-A) (Phosphofructokinase-M)<br>[MASS=85051]          | *    | 1.03 | *    | *    | * | 1 | 2 | KRSGEAAV                                | 1 |
| K6PP_HUMAN (Q01813) 6-<br>phosphofructokinase type C (EC 2.7.1.11)<br>(Phosphofructokinase 1) (Phosphohexokinase)<br>(Phosphofructo-1-kinase isozyme C) (PFK-C)<br>(6-phosphofructokinase, platelet type)<br>[MASS=85596] | 0.00 | 2.81 | 3.95 | 0.00 | 1 | 1 | 2 | GITNLC[339]VIGGDGSLTGANLFRK             | 1 |

|                                                                                                                                                                                                    |      |       |      |      |   |   |   |                                          |   |
|----------------------------------------------------------------------------------------------------------------------------------------------------------------------------------------------------|------|-------|------|------|---|---|---|------------------------------------------|---|
| KBL_HUMAN (O75600) 2-amino-3-ketobutyrate coenzyme A ligase, mitochondrial precursor (EC 2.3.1.29) (AKB ligase) (Glycine acetyltransferase) [MASS=45285]                                           | *    | 6.68  | *    | *    | * | 1 | 3 | FRSKMEAAGFTISGASHPIC[339]PVMLGDAR        | 1 |
|                                                                                                                                                                                                    |      |       |      |      |   |   | 3 | M[147]C[330]DPGM[147]TAFEPEALGNLVEGLDFHR | 1 |
|                                                                                                                                                                                                    |      |       |      |      |   |   | 2 | QETVDC[330]LKK                           | 2 |
| KCC2A_HUMAN (Q9UQM7) Calcium/calmodulin-dependent protein kinase type II alpha chain (EC 2.7.11.17) (CaM-kinase II alpha chain) (CaM kinase II alpha subunit) (CaMK-II subunit alpha) [MASS=54029] | 1.00 | 9.00  | 0.70 | 0.10 | 8 | 3 | 2 | STVASC[339]M[147]HR                      | 1 |
|                                                                                                                                                                                                    |      |       |      |      |   |   | 2 | QETVDC[339]LKK                           | 1 |
|                                                                                                                                                                                                    |      |       |      |      |   |   | 2 | STVASC[339]MHR                           | 2 |
|                                                                                                                                                                                                    |      |       |      |      |   |   | 3 | M[147]C[339]DPGMTAFEPEALGNLVEGLDFHR      | 1 |
|                                                                                                                                                                                                    |      |       |      |      |   |   | 2 | STVASC[330]M[147]HR                      | 3 |
| KCC2B_HUMAN (Q13554) Calcium/calmodulin-dependent protein kinase type II beta chain (EC 2.7.11.17) (CaM-kinase II beta chain) (CaM kinase II subunit beta) (CaMK-II subunit beta) [MASS=72726]     | 1.00 | 12.05 | 0.84 | 0.06 | 5 | 4 | 2 | WQNVHFHC[330]SGAPVAPLQ                   | 1 |
|                                                                                                                                                                                                    |      |       |      |      |   |   | 2 | LC[339]TGHEYAAK                          | 2 |
|                                                                                                                                                                                                    |      |       |      |      |   |   | 2 | LC[330]TGHEYAAK                          | 2 |
|                                                                                                                                                                                                    |      |       |      |      |   |   | 3 | NSKPIHTTILNPHVHVIGEDAAC[330]IAYIR        | 1 |
|                                                                                                                                                                                                    |      |       |      |      |   |   | 3 | IC[330]DPGLTSFEPEALGNLVEGM[147]DFHR      | 1 |
| KCC2D_HUMAN (Q13557) Calcium/calmodulin-dependent protein kinase type II delta chain (EC 2.7.11.17) (CaM-kinase II delta chain) (CaM kinase II subunit delta) (CaMK-II subunit delta) [MASS=56297] | 1.00 | 5.01  | 1.62 | 0.02 | 2 | 1 | 3 | IC[339]DPGLTAFEPEALGNLVEGMDFHR           | 1 |
|                                                                                                                                                                                                    |      |       |      |      |   |   | 3 | IC[330]DPGLTAFEPEALGNLVEGMDFHR           | 1 |
| KCC2G_HUMAN (Q13555) Calcium/calmodulin-dependent protein kinase type II gamma chain (EC 2.7.11.17) (CaM-kinase II gamma chain) (CaM kinase II gamma subunit) (CaMK-II subunit gamma) [MASS=62609] | 1.00 | 4.48  | 1.20 | 0.00 | 1 | 1 | 3 | IC[330]DPGLTSFEPEALGNLVEGMDFHK           | 1 |
| KCNB2_HUMAN (Q92953) Potassium voltage-gated channel subfamily B member 2 (Voltage-gated potassium channel subunit Kv2.2) [MASS=102562]                                                            | 0.00 | 3.62  | 1.01 | 0.00 | 1 | 3 | 2 | EREGEEFDNTC[339]C[339]PDKR               | 1 |
|                                                                                                                                                                                                    |      |       |      |      |   |   | 1 | GSNPLK                                   | 1 |
|                                                                                                                                                                                                    |      |       |      |      |   |   | 1 | RNGSIVSMNLK                              | 1 |

|                                                                                                                                                                 |      |       |      |      |    |   |   |                                       |   |
|-----------------------------------------------------------------------------------------------------------------------------------------------------------------|------|-------|------|------|----|---|---|---------------------------------------|---|
| KCND2_HUMAN (Q9NZV8) Potassium voltage-gated channel subfamily D member 2 (Voltage-gated potassium channel subunit Kv4.2) [MASS=70536]                          | 0.00 | 4.76  | 2.96 | 0.00 | 1  | 2 | 3 | TPLSNSRSSLNAKMEEEC[330]VK             | 1 |
|                                                                                                                                                                 |      |       |      |      |    |   | 3 | C[339]VERTPLSNSR                      | 1 |
| KCNG4_HUMAN (Q8TDN1) Potassium voltage-gated channel subfamily G member 4 (Voltage-gated potassium channel subunit Kv6.4) [MASS=58979]                          | *    | 1.93  | *    | *    | *  | 1 | 2 | FPLSRLSKLR                            | 1 |
|                                                                                                                                                                 |      |       |      |      |    |   | 3 | SKDYEFM[147]WNPHLGYILTC[339]PSNLGTGLR | 1 |
| KCRB_HUMAN (P12277) Creatine kinase B-type (EC 2.7.3.2) (Creatine kinase B chain) (B-CK) [MASS=42644]                                                           | 1.00 | 13.12 | 0.71 | 0.47 | 6  | 3 | 2 | FC[339]TGLTQIETLFK                    | 1 |
|                                                                                                                                                                 |      |       |      |      |    |   | 2 | FC[330]TGLTQIETLFK                    | 1 |
|                                                                                                                                                                 |      |       |      |      |    |   | 2 | GFC[330]LPPHC[330]SR                  | 2 |
|                                                                                                                                                                 |      |       |      |      |    |   | 2 | GFC[339]LPPHC[339]SR                  | 2 |
| KCRS_HUMAN (P17540) Creatine kinase, sarcomeric mitochondrial precursor (EC 2.7.3.2) (S-MtCK) (Mib-CK) (Basic-type mitochondrial creatine kinase) [MASS=47520]  | 0.00 | 21.00 | *    | *    | *  | 5 | 3 | LGYILTC[339]PSNLGTGLRAGVHVRIPK        | 1 |
|                                                                                                                                                                 |      |       |      |      |    |   | 2 | LGYILTC[330]PSNLGTGLR                 | 2 |
|                                                                                                                                                                 |      |       |      |      |    |   | 2 | LGYILTC[339]PSNLGTGLR                 | 1 |
|                                                                                                                                                                 |      |       |      |      |    |   | 3 | PVSPLLTC[330]AGMAR                    | 1 |
|                                                                                                                                                                 |      |       |      |      |    |   | 2 | GLSLPPAC[339]TR                       | 1 |
|                                                                                                                                                                 |      |       |      |      |    |   | 3 | TVGMVAGDEESYEVFADLFDPVIK              | 1 |
| KCRU_HUMAN (P12532) Creatine kinase, ubiquitous mitochondrial precursor (EC 2.7.3.2) (U-MtCK) (Mia-CK) (Acidic-type mitochondrial creatine kinase) [MASS=47036] | 1.00 | 8.87  | 1.22 | 0.07 | 17 | 2 | 2 | HNNC[330]M[147]ASHLTPAVYAR            | 1 |
|                                                                                                                                                                 |      |       |      |      |    |   | 2 | SEVELVQLVIDGVNYLIDC[330]ER            | 3 |
|                                                                                                                                                                 |      |       |      |      |    |   | 3 | HNNC[339]M[147]ASHLTPAVYAR            | 1 |
|                                                                                                                                                                 |      |       |      |      |    |   | 2 | HNNC[330]MASHLTPAVYAR                 | 1 |
|                                                                                                                                                                 |      |       |      |      |    |   | 2 | HNNC[339]MASHLTPAVYAR                 | 1 |
|                                                                                                                                                                 |      |       |      |      |    |   | 3 | SEVELVQLVIDGVNYLIDC[330]ER            | 1 |
| KGP1A_HUMAN (Q13976) cGMP-dependent protein kinase 1, alpha isozyme (EC 2.7.11.12) (CGK 1 alpha) (cGKI-alpha) [MASS=76233]                                      | *    | 4.18  | *    | *    | *  | 2 | 2 | TYNIILRGIDM[147]IEFPKK                | 1 |
|                                                                                                                                                                 |      |       |      |      |    |   | 2 | TLGKGDWFGEK                           | 1 |
|                                                                                                                                                                 |      |       |      |      |    |   | 3 | SEVELVQLVIDGVNYLIDC[339]ER            | 1 |
|                                                                                                                                                                 |      |       |      |      |    |   | 2 | HNNC[339]M[147]ASHLTPAVYAR            | 1 |

|                                                                                                                                                                                                                 |      |      |      |      |   |    |   |                                         |   |
|-----------------------------------------------------------------------------------------------------------------------------------------------------------------------------------------------------------------|------|------|------|------|---|----|---|-----------------------------------------|---|
| KI13A_HUMAN (Q9H1H9) Kinesin-like protein KIF13A (Kinesin-like protein RBKIN) [MASS=202258]                                                                                                                     | *    | 0.72 | *    | *    | * | 1  | 2 | RGAIVSEPAIQVR                           | 1 |
|                                                                                                                                                                                                                 |      |      |      |      |   |    | 2 | LFLIVRVTVQLSHPADMQLVLR                  | 1 |
|                                                                                                                                                                                                                 |      |      |      |      |   |    | 3 | LSGDVGERIAGGDEVAEVPFEKETQENK            | 1 |
| KI13B_HUMAN (Q9NQT8) Kinesin-like protein KIF13B (Kinesin-like protein GAKIN) [MASS=202665]                                                                                                                     | 0.00 | 6.52 | 5.70 | 0.00 | 1 | 5  | 3 | YVGPADFQEGTWVGVLDLPSGKNDGSIGGKQYFR      | 1 |
|                                                                                                                                                                                                                 |      |      |      |      |   |    | 3 | SYTM[147]M[147]GTADQPGLIPRLC[339]SGLFER | 1 |
|                                                                                                                                                                                                                 |      |      |      |      |   |    | 2 | VAVRIRPMNR                              | 1 |
| KI21A_HUMAN (Q7Z4S6) Kinesin family member 21A (Kinesin-like protein KIF2) (NY-REN-62 antigen) [MASS=187178]                                                                                                    | 0.99 | 2.69 | 0.45 | 0.00 | 1 | 2  | 3 | LIEGC[339]FEGYNATVFAYGQTGAGK            | 1 |
|                                                                                                                                                                                                                 |      |      |      |      |   |    | 2 | EGISINC[330]GLLALGNVISALGDK             | 1 |
|                                                                                                                                                                                                                 |      |      |      |      |   |    | 2 | AM[147]HTPKPAVSGEKNIYAFM[147]GTPVQK     | 1 |
|                                                                                                                                                                                                                 |      |      |      |      |   |    | 2 | VSFGGHLR                                | 1 |
|                                                                                                                                                                                                                 |      |      |      |      |   |    | 2 | PAVSGEKNIYAFM[147]GTPVQK                | 1 |
|                                                                                                                                                                                                                 |      |      |      |      |   |    | 3 | ELFSAPGHTEESM[147]TIDKNTKIPC[330]K      | 1 |
| KI67_HUMAN (P46013) Antigen KI-67 [MASS=358743]                                                                                                                                                                 | *    | 5.19 | *    | *    | * | 10 | 2 | AQSLVISPPAPSPR                          | 1 |
|                                                                                                                                                                                                                 |      |      |      |      |   |    | 2 | DGSVTGTKR                               | 1 |
|                                                                                                                                                                                                                 |      |      |      |      |   |    | 3 | QDKTEAEQQITEVFVLAERIEINR                | 1 |
|                                                                                                                                                                                                                 |      |      |      |      |   |    | 2 | HLRTRVQK                                | 1 |
|                                                                                                                                                                                                                 |      |      |      |      |   |    | 2 | RVSISRSQHDILQMIC[330]SK                 | 1 |
|                                                                                                                                                                                                                 |      |      |      |      |   |    | 2 | AFMESPKQILDSAASLTGSK                    | 1 |
| KIF11_HUMAN (P52732) Kinesin-like protein KIF11 (Kinesin-related motor protein Eg5) (Kinesin-like spindle protein HKSP) (Thyroid receptor-interacting protein 5) (TRIP5) (Kinesin-like protein 1) [MASS=119273] | 0.00 | 2.65 | 0.57 | 0.00 | 1 | 2  | 2 | TPHVPYRESKLTR                           | 1 |
|                                                                                                                                                                                                                 |      |      |      |      |   |    | 2 | QPELLMMLNC[330]SENNK                    | 1 |
| KLD7B_HUMAN (Q96G42) Kelch domain-containing protein 7B [MASS=53295]                                                                                                                                            | 0.00 | 6.67 | 0.29 | 0.00 | 1 | 1  | 2 | C[339]EIAPSSSEQEVRPAASGDPQGEAPGEGGSPAGR | 1 |
| KLF17_HUMAN (Q5JT82) Krueppel-like factor 17 (Zinc finger protein 393) [MASS=42577]                                                                                                                             | 0.00 | 5.91 | 1.33 | 0.00 | 1 | 2  | 2 | GM[147]SYC[339]PQATLTPSR                | 1 |
|                                                                                                                                                                                                                 |      |      |      |      |   |    | 3 | HM[147]RVHTRYR                          | 1 |
| KLH12_HUMAN (Q53G59) Kelch-like protein 12 (CUL3-interacting protein 1) [MASS=63277]                                                                                                                            | 0.00 | 5.99 | 2.37 | 0.00 | 1 | 2  | 2 | PELRSQMGGPRTR                           | 1 |
|                                                                                                                                                                                                                 |      |      |      |      |   |    | 3 | SILNSMNSLRKSNTLC[339]DVTLR              | 1 |
| KLK3_HUMAN (P07288) Prostate-specific antigen precursor (EC 3.4.21.77) (PSA) (Kallikrein-3) (Semenogelase) (Gamma-seminoprotein) (Seminin) (P-30 antigen) [MASS=28741]                                          | 0.00 | 8.05 | 2.58 | 0.00 | 1 | 1  | 3 | LQC[339]VDLHVISNDVC[339]AQVHPQK         | 1 |



|                                                                                                                                                                                                                       |      |       |      |      |   |   |   |                                               |   |
|-----------------------------------------------------------------------------------------------------------------------------------------------------------------------------------------------------------------------|------|-------|------|------|---|---|---|-----------------------------------------------|---|
| KNTC1_HUMAN (P50748) Kinetochore-associated protein 1 (Rough deal homolog) (hRod) (HsROD) (Rod) [MASS=250747]                                                                                                         | *    | 2.35  | *    | *    | * | 2 | 2 | TALIYSDGLKEVLRHAHAK                           | 1 |
|                                                                                                                                                                                                                       |      |       |      |      |   |   | 3 | LIDKAWQNYDKILAI SLVGS ELASLYQEIEM[147]GLK     | 1 |
| KPCA_HUMAN (P17252) Protein kinase C alpha type (EC 2.7.11.13) (PKC-alpha) (PKC-A) [MASS=76632]                                                                                                                       | 0.93 | 12.37 | 0.68 | 0.00 | 1 | 5 | 3 | QC[330]VINVPSLC[339]GMDHTEK                   | 1 |
|                                                                                                                                                                                                                       |      |       |      |      |   |   | 2 | LTDFNFLMVLGKGSFGKVM[147]LADR                  | 1 |
|                                                                                                                                                                                                                       |      |       |      |      |   |   | 3 | TTRNDFM[147]GSLSFGVSELM[147]K                 | 1 |
|                                                                                                                                                                                                                       |      |       |      |      |   |   | 3 | HPAKRLGC[330]GPEGER                           | 1 |
|                                                                                                                                                                                                                       |      |       |      |      |   |   | 2 | C[330]DTC[330]DM[147]NVHK                     | 1 |
| KPCE_HUMAN (Q02156) Protein kinase C epsilon type (EC 2.7.11.13) (nPKC-epsilon) [MASS=83673]                                                                                                                          | *    | 1.36  | *    | *    | * | 1 | 2 | DNEERVFRER                                    | 1 |
| KPCG_HUMAN (P05129) Protein kinase C gamma type (EC 2.7.11.13) (PKC-gamma) [MASS=78447]                                                                                                                               | *    | 3.30  | *    | *    | * | 1 | 2 | C[339]FFGASPGR LHISDFSFLMVLGK                 | 1 |
| KPYM_HUMAN (P14618) Pyruvate kinase isozymes M1/M2 (EC 2.7.1.40) (Pyruvate kinase muscle isozyme) (Cytosolic thyroid hormone-binding protein) (CTHBP) (THBP1) [MASS=57805]                                            | 0.90 | 3.77  | 0.55 | 0.00 | 1 | 2 | 2 | NTGIIC[330]TIGPASR                            | 1 |
|                                                                                                                                                                                                                       |      |       |      |      |   |   | 1 | VVEVGSK                                       | 1 |
| KR108_HUMAN (P60410) Keratin-associated protein 10-8 (Keratin-associated protein 10.8) (High sulfur keratin-associated protein 10.8) (Keratin-associated protein 18-8) (Keratin-associated protein 18.8) [MASS=26318] | 0.00 | 9.65  | *    | *    | * | 1 | 3 | VSSPSTC[330]TGSSWQVDNC[339]QESC[339]C[339]EPR | 1 |
| KREM2_HUMAN (Q8NCW0) Kremen protein 2 precursor (Kringle-containing protein marking the eye and the nose) (Kringle domain-containing transmembrane protein 2) (Dickkopf receptor 2) [MASS=48849]                      | *    | 1.08  | *    | *    | * | 1 | 1 | GHQNR                                         | 1 |
| KRIT1_HUMAN (O00522) Krev interaction trapped protein 1 (Krev interaction trapped 1) (Cerebral cavernous malformations 1 protein) [MASS=84347]                                                                        | 0.00 | 5.57  | *    | *    | * | 3 | 1 | MLIALDK                                       | 1 |
|                                                                                                                                                                                                                       |      |       |      |      |   |   | 2 | M[147]LIALDKW LDER                            | 1 |
|                                                                                                                                                                                                                       |      |       |      |      |   |   | 2 | VC[339]SESSTHFATLTARM[147]LIALDK              | 1 |
| KSR2_HUMAN (Q6VAB6) Kinase suppressor of ras-2 (hKSR2) [MASS=93585]                                                                                                                                                   | *    | 2.41  | *    | *    | * | 2 | 2 | PNLSQIGMGK                                    | 1 |
|                                                                                                                                                                                                                       |      |       |      |      |   |   | 2 | QRHAVRTPPR                                    | 1 |
| L1CAM_HUMAN (P32004) Neural cell adhesion molecule L1 precursor (N-CAM L1) (CD171 antigen) [MASS=140002]                                                                                                              | *    | 0.48  | *    | *    | * | 1 | 1 | HQMAVK                                        | 1 |

|                                                                                                                                                                                                                                                        |      |       |      |      |   |   |   |                                   |   |
|--------------------------------------------------------------------------------------------------------------------------------------------------------------------------------------------------------------------------------------------------------|------|-------|------|------|---|---|---|-----------------------------------|---|
| LAMA2_HUMAN (P24043) Laminin alpha-2 chain precursor (Laminin M chain) (Merosin heavy chain) [MASS=342769]                                                                                                                                             | *    | 2.15  | *    | *    | * | 3 | 2 | GENEEMEKDLREK                     | 1 |
|                                                                                                                                                                                                                                                        |      |       |      |      |   |   | 3 | KADAVRVITFTGC[330]MGETYFDNK       | 1 |
|                                                                                                                                                                                                                                                        |      |       |      |      |   |   | 3 | NGLPYFSYDLGSGDTHMIPTKINDGQWHKIK   | 1 |
| LAMP1_HUMAN (P11279) Lysosome-associated membrane glycoprotein 1 precursor (LAMP-1) (CD107a antigen) [MASS=44773]                                                                                                                                      | 1.00 | 6.97  | 0.68 | 0.02 | 2 | 2 | 2 | NM[147]TFDLPSDATVVLNRSSC[339]GK   | 1 |
|                                                                                                                                                                                                                                                        |      |       |      |      |   |   | 2 | C[339]NAEEHVR                     | 1 |
|                                                                                                                                                                                                                                                        |      |       |      |      |   |   | 2 | C[330]NAEEHVR                     | 1 |
| LANC2_HUMAN (Q9NS86) LanC-like protein 2 (Testis-specific adriamycin sensitivity protein) [MASS=50854]                                                                                                                                                 | 0.00 | 5.56  | 2.42 | 0.00 | 1 | 1 | 3 | TADPHDC[339]SAYTGWTGIALLYLQLYR    | 1 |
| LASS4_HUMAN (Q9HA82) LAG1 longevity assurance homolog 4 [MASS=46399]                                                                                                                                                                                   | 0.48 | 5.08  | 0.70 | 0.00 | 1 | 1 | 2 | IGSLVLLLDSSDYLLLEAC[330]K         | 1 |
| LASS6_HUMAN (Q6ZMG9) LAG1 longevity assurance homolog 6 [MASS=44890]                                                                                                                                                                                   | *    | 2.86  | *    | *    | * | 1 | 2 | RNQEKPSTLTR                       | 1 |
| LBC_HUMAN (Q12802) LBC oncogene (P47) (Lymphoid blast crisis oncogene) [MASS=49052]                                                                                                                                                                    | 0.00 | 6.13  | 0.20 | 0.00 | 1 | 2 | 2 | LGIPEC[330]ILLVTQR                | 1 |
|                                                                                                                                                                                                                                                        |      |       |      |      |   |   | 3 | SIM[147]RM[147]KSGQM[147]FAK      | 1 |
| LCMT2_HUMAN (O60294) Leucine carboxyl methyltransferase 2 (EC 2.1.1.-) (p21WAF1/CIP1 promoter-interacting protein) [MASS=75601]                                                                                                                        | *    | 7.43  | *    | *    | * | 3 | 2 | DC[330]DSEWKGSQIGSC[330]GTGVQWDGR | 1 |
|                                                                                                                                                                                                                                                        |      |       |      |      |   |   | 3 | AVRHC[339]VRAFLEQIGAPQAALR        | 1 |
|                                                                                                                                                                                                                                                        |      |       |      |      |   |   | 1 | LYHTM[147]TR                      | 1 |
| LDH6A_HUMAN (Q6ZMR3) L-lactate dehydrogenase A-like 6A (EC 1.1.1.27) [MASS=36507]                                                                                                                                                                      | 0.00 | 3.61  | *    | *    | * | 1 | 2 | VIGSGC[339]NLDSAR                 | 1 |
| LDHB_HUMAN (P07195) L-lactate dehydrogenase B chain (EC 1.1.1.27) (LDH-B) (LDH heart subunit) (LDH-H) (NY-REN-46 antigen) [MASS=36507]                                                                                                                 | 1.00 | 6.01  | 0.57 | 0.36 | 3 | 1 | 2 | GM[147]YGIENEVFLSLPC[339]ILNAR    | 1 |
|                                                                                                                                                                                                                                                        |      |       |      |      |   |   | 2 | GM[147]YGIENEVFLSLPC[330]ILNAR    | 1 |
| LDHC_HUMAN (P07864) L-lactate dehydrogenase C chain (EC 1.1.1.27) (LDH-C) (LDH testis subunit) (LDH-X) [MASS=36180]                                                                                                                                    | 0.00 | 6.65  | *    | *    | * | 1 | 3 | LKGYTSWAIGLSVM[147]DLVGSILK       | 1 |
|                                                                                                                                                                                                                                                        |      |       |      |      |   |   | 2 | LKGYTSWAIGLSVMDLVGSILK            | 1 |
| LEG1_HUMAN (P09382) Galectin-1 (Lectin galactoside-binding soluble 1) (Beta-galactoside-binding lectin L-14-I) (Lactose-binding lectin 1) (S-Lac lectin 1) (Galaptin) (14 kDa lectin) (HPL) (HBL) (Putative MAPK-activating protein MP12) [MASS=14584] | 1.00 | 20.15 | 0.82 | 0.15 | 3 | 2 | 2 | DSNNLC[330]LHFNPR                 | 1 |
|                                                                                                                                                                                                                                                        |      |       |      |      |   |   | 2 | FNAHGDANTIVC[330]NSK              | 1 |
|                                                                                                                                                                                                                                                        |      |       |      |      |   |   | 2 | DSNNLC[339]LHFNPR                 | 1 |

|                                                                                                                                                                                                 |      |       |       |      |   |   |   |                                                                                                                                                       |                  |
|-------------------------------------------------------------------------------------------------------------------------------------------------------------------------------------------------|------|-------|-------|------|---|---|---|-------------------------------------------------------------------------------------------------------------------------------------------------------|------------------|
| LETM1_HUMAN (O95202) Leucine zipper-EF-hand-containing transmembrane protein 1, mitochondrial precursor [MASS=83354]                                                                            | 0.00 | 5.41  | 0.82  | 0.00 | 1 | 2 | 2 | LELAKFLQDTIEEM[147]ALKNK<br>APWTSTSVGFVAVGPQC[330]LPVR                                                                                                | 1<br>1           |
| LNK2_HUMAN (Q8N448) Ligand of Numb-protein X 2 (Numb-binding protein 2) (PDZ domain-containing RING finger protein 1) [MASS=76004]                                                              | 0.00 | 13.48 | 0.93  | 0.00 | 1 | 4 | 3 | YGTPELAAQIIQASGERVNLTARPGK<br>C[330]GDM[147]IVAVNGLSTVGM[147]SHSALVPM[147]LKEQR<br>C[330]GDM[147]IVAVNGLSTVGM[147]SHSALVPM[147]LK<br>LC[330]JKSSILVHK | 1<br>1<br>1<br>1 |
| LPP1_HUMAN (O14494) Lipid phosphate phosphohydrolase 1 (EC 3.1.3.4) (Phosphatidic acid phosphatase 2a) (Phosphatidate phosphohydrolase type 2a) (PAP2a) (PAP-2a) (PAP2-alpha) [MASS=32156]      | 0.00 | 10.56 | 11.01 | 0.00 | 1 | 1 | 3 | MFDKTRLPYVALDVLG[339]VLLAGLPFAILTSR                                                                                                                   | 1                |
| LPP_HUMAN (Q93052) Lipoma-preferred partner (LIM domain-containing preferred translocation partner in lipoma) [MASS=65746]                                                                      | 0.00 | 6.37  | 3.73  | 0.00 | 1 | 2 | 2 | KM[147]LYDMENPPADEYFGRC[330]JAR<br>C[339]SVC[339]KEPIMPAPGQEETVR                                                                                      | 1<br>1           |
| LRC27_HUMAN (Q9C0I9) Leucine-rich repeat-containing protein 27 [MASS=60089]                                                                                                                     | *    | 1.70  | *     | *    | * | 1 | 2 | LGLTLNKDR                                                                                                                                             | 3                |
| LRC47_HUMAN (Q8N1G4) Leucine-rich repeat-containing protein 47 [MASS=63472]                                                                                                                     | *    | 3.26  | *     | *    | * | 1 | 2 | GM[147]DLQPGNALKRFLTSQTK                                                                                                                              | 1                |
| LRC57_HUMAN (Q8N9N7) Leucine-rich repeat-containing protein 57 [MASS=26754]                                                                                                                     | *    | 5.44  | *     | *    | * | 1 | 3 | HLDVM[147]DLSKNQIR                                                                                                                                    | 1                |
| LRC59_HUMAN (Q96AG4) Leucine-rich repeat-containing protein 59 [MASS=34930]                                                                                                                     | *    | 10.42 | *     | *    | * | 2 | 3 | WLDLKDNPDPVLAKVAGDC[339]LDEK<br>SKSGSRPR                                                                                                              | 1<br>1           |
| LRC8C_HUMAN (Q8TDW0) Leucine-rich repeat-containing protein 8C (Protein AD158) [MASS=92391]                                                                                                     | *    | 2.74  | *     | *    | * | 1 | 3 | YFPYLVIHTLVFM[147]LC[339]SNFWFK                                                                                                                       | 1                |
| LRMP_HUMAN (Q12912) Lymphoid-restricted membrane protein (Protein Jaw1) [MASS=62092]                                                                                                            | *    | 1.62  | *     | *    | * | 1 | 2 | TRKPSLSEK                                                                                                                                             | 1                |
| LRP1_HUMAN (Q07954) Low-density lipoprotein receptor-related protein 1 precursor (LRP) (Alpha-2-macroglobulin receptor) (A2MR) (Apolipoprotein E receptor) (APOER) (CD91 antigen) [MASS=504573] | 0.00 | 1.14  | 0.52  | 0.00 | 1 | 3 | 3 | C[330]VRTEKAAYC[330]AC[339]R<br>DC[330]ADGADESIAAGC[330]LYNSTC[330]DDR<br>IERC[330]EYDGSRYVILK                                                        | 1<br>1<br>1      |

1 STSLKVK 11

|                                                                                                                                                                                                               |      |      |      |      |   |   |   |                                        |   |
|---------------------------------------------------------------------------------------------------------------------------------------------------------------------------------------------------------------|------|------|------|------|---|---|---|----------------------------------------|---|
| LRRN3_HUMAN (Q9H3W5) Leucine-rich repeats neuronal protein 3 precursor (Neuronal leucine-rich repeat protein 3) (NLRR-3) [MASS=79424]                                                                         | *    | 0.99 | *    | *    | * | 1 |   |                                        |   |
| LY6H_HUMAN (O94772) Lymphocyte antigen Ly-6H precursor [MASS=14669]                                                                                                                                           | 0.99 | 9.29 | 0.59 | 0.00 | 1 | 1 | 2 | QC[330]QPSDTV[C330]ASVR                | 1 |
| LYPA2_HUMAN (O95372) Acyl-protein thioesterase 2 (EC 3.1.2.-) (Lysophospholipase II) (LPL-I) [MASS=24737]                                                                                                     | 0.87 | 7.79 | 1.17 | 0.00 | 1 | 2 | 2 | YIC[330]PHAPR                          | 1 |
|                                                                                                                                                                                                               |      |      |      |      |   |   | 2 | FGALTAEKLR                             | 1 |
| M2GD_HUMAN (Q9U117) Dimethylglycine dehydrogenase, mitochondrial precursor (EC 1.5.99.2) (ME2GLYDH) [MASS=96806]                                                                                              | 0.00 | 1.39 | 0.18 | 0.00 | 1 | 1 | 2 | SC[330]PLQGSPGRPR                      | 1 |
| M3K4_HUMAN (Q9Y6R4) Mitogen-activated protein kinase kinase kinase 4 (EC 2.7.11.25) (MAPK/ERK kinase kinase 4) (MEK kinase 4) (MEKK 4) (MAP three kinase 1) [MASS=181550]                                     | *    | 2.05 | *    | *    | * | 2 | 2 | TLISQSKDTASK                           | 1 |
|                                                                                                                                                                                                               |      |      |      |      |   |   | 3 | PHSPVTGLYLAIHRNSPRPMK                  | 1 |
|                                                                                                                                                                                                               |      |      |      |      |   |   | 1 | HGHLSEK                                | 1 |
|                                                                                                                                                                                                               |      |      |      |      |   |   | 2 | ALLELVWRAREGLDK                        | 1 |
| MACF1_HUMAN (Q9UPN3) Microtubule-actin crosslinking factor 1, isoforms 1/2/3/5 (Actin cross-linking family protein 7) (Macrophin-1) (Trabeculin-alpha) (620 kDa actin-binding protein) (ABP620) [MASS=620414] | *    | 3.09 | *    | *    | * | 9 | 3 | LEEEKVVVEEKQEHVEK                      | 1 |
|                                                                                                                                                                                                               |      |      |      |      |   |   | 2 | DGHNLSLLEVLGKLPREK                     | 1 |
|                                                                                                                                                                                                               |      |      |      |      |   |   | 2 | ATHSSSTSWFRKPM[147]TR                  | 1 |
|                                                                                                                                                                                                               |      |      |      |      |   |   | 3 | C[330]DSFLHQSPSSSVPTLRSELNLLVEK        | 1 |
|                                                                                                                                                                                                               |      |      |      |      |   |   | 2 | ELMMGVLGPLSIDPNM[147]LNAQKQVQFM[147]LK | 1 |
|                                                                                                                                                                                                               |      |      |      |      |   |   | 2 | FLDVLELAEKFWYDMAALLTTIK                | 1 |
|                                                                                                                                                                                                               |      |      |      |      |   |   | 2 | NQTKLDQC[339]QK                        | 1 |
| MACF4_HUMAN (Q96PK2) Microtubule-actin crosslinking factor 1, isoform 4 [MASS=670146]                                                                                                                         | *    | 0.86 | *    | *    | * | 3 | 3 | QIQPLELNLAELQDLLC[339]QAKVLER          | 1 |
|                                                                                                                                                                                                               |      |      |      |      |   |   | 3 | LLPVKQLAGGM[147]VSLKSGR                | 1 |
|                                                                                                                                                                                                               |      |      |      |      |   |   | 1 | IISSETVGLK                             | 1 |
| MAGAB_HUMAN (P43364) Melanoma-associated antigen 11 (MAGE-11 antigen) [MASS=48129]                                                                                                                            | 0.00 | 2.56 | 7.08 | 0.00 | 1 | 1 | 2 | GGLGC[339]SPASIK                       | 1 |

|                                                                                                                                                                                                                                                                              |      |      |      |      |   |   |   |                                                                                                               |                       |
|------------------------------------------------------------------------------------------------------------------------------------------------------------------------------------------------------------------------------------------------------------------------------|------|------|------|------|---|---|---|---------------------------------------------------------------------------------------------------------------|-----------------------|
| MAON_HUMAN (Q16798) NADP-dependent malic enzyme, mitochondrial precursor (EC 1.1.1.40) (NADP-ME) (Malic enzyme 3) [MASS=67054]                                                                                                                                               | 0.99 | 6.46 | 2.69 | 0.00 | 1 | 2 | 3 | YC[339]M[147]FNDDIQGTASVAVAGILAALR<br>3 NEKLFYRVLTSDEK                                                        | 1<br>1                |
| MAOX_HUMAN (P48163) NADP-dependent malic enzyme (EC 1.1.1.40) (NADP-ME) (Malic enzyme 1) [MASS=64149]                                                                                                                                                                        | 0.00 | 6.82 | 0.69 | 0.00 | 1 | 2 | 2 | ILGLGDLGC[330]NGM[147]GIPVVK<br>3 EKFAHEHEEM[147]KNLEAIVQEIK                                                  | 1<br>1                |
| MAP1A_HUMAN (P78559) Microtubule-associated protein 1A (MAP 1A) (Proliferation-related protein p80) [Contains: MAP1 light chain LC2] [MASS=306529]                                                                                                                           | 0.24 | 2.50 | 0.77 | 0.00 | 1 | 5 | 3 | SEPQDFQEADSWGDTK<br>2 LEALLEKTK<br>2 RSIEEAC[339]LTLQHLNR<br>2 LSKPC[330]C[330]YIFPGGR<br>2 SVEHKAPEDTVAEMKDR | 1<br>1<br>1<br>1<br>1 |
| MAP1B_HUMAN (P46821) Microtubule-associated protein 1B (MAP 1B) [Contains: MAP1 light chain LC1] [MASS=270618]                                                                                                                                                               | 0.24 | 1.54 | *    | *    | * | 2 | 2 | SDISPLTPRESSPLYSPTFSDSTSAVK<br>2 M[147]SISEGTVSDK                                                             | 1<br>1                |
| MASP2_HUMAN (O00187) Mannan-binding lectin serine protease 2 precursor (EC 3.4.21.104) (Mannose-binding protein-associated serine protease 2) (MASP-2) (MBL-associated serine protease 2) [Contains: Mannan-binding lectin serine protease 2 A chain; Mannan-b] [MASS=75685] | *    | 1.31 | *    | *    | * | 1 | 2 | HDASALDIR                                                                                                     | 2                     |
| MAST3_HUMAN (O60307) Microtubule-associated serine/threonine-protein kinase 3 (EC 2.7.11.1) [MASS=143136]                                                                                                                                                                    | *    | 1.22 | *    | *    | * | 1 | 3 | SRASSSGGSGGGSGGR                                                                                              | 1                     |
| MATR3_HUMAN (P43243) Matrin-3 [MASS=94623]                                                                                                                                                                                                                                   | 0.00 | 4.84 | 0.52 | 0.00 | 1 | 2 | 2 | C[330]VKVDLSEK<br>3 DLSAAGIGLLAAATQSLSM[147]PASLGRMNQGTAR                                                     | 1<br>1                |
| MCE1_HUMAN (O60942) mRNA capping enzyme (HCE) (HCAP1) [Includes: Polynucleotide 5'-triphosphatase (EC 3.1.3.33) (mRNA 5'-triphosphatase) (TPase); mRNA guanylyltransferase (EC 2.7.7.50) (GTP--RNA guanylyltransferase) (GTase)] [MASS=68556]                                | *    | 8.21 | *    | *    | * | 3 | 3 | ESEPGSSASFGKRR<br>2 FHPSMLSNYLKSLKVK<br>2 DLRM[147]HLSNTLLDGEM[147]IIDR                                       | 1<br>1<br>1           |

|                                                                                                                                                                                                                    |                                    |       |      |      |   |   |   |                                                  |   |
|--------------------------------------------------------------------------------------------------------------------------------------------------------------------------------------------------------------------|------------------------------------|-------|------|------|---|---|---|--------------------------------------------------|---|
| MDGA1_HUMAN (Q8NFP4) MAM domain-containing glycosylphosphatidylinositol anchor protein 1 precursor (MAM domain-containing protein 3) (GPI and MAM protein) (Glycosylphosphatidylinositol-MAM) (GPIM) [MASS=105790] | *                                  | 1.15  | *    | *    | * | 1 | 2 | WTKTAGSASDK                                      | 1 |
| MDHC_HUMAN (P40925) Malate dehydrogenase, cytoplasmic (EC 1.1.1.37) (Cytosolic malate dehydrogenase) [MASS=36295]                                                                                                  | 0.47                               | 2.10  | 0.48 | 0.00 | 1 | 1 | 1 | AIC[330]DHVR                                     | 1 |
|                                                                                                                                                                                                                    |                                    |       |      |      |   |   | 2 | AIC[330]DHVR                                     | 1 |
|                                                                                                                                                                                                                    |                                    |       |      |      |   |   | 2 | TIIP LISQC[339]TPK                               | 2 |
| MDHM_HUMAN (P40926) Malate dehydrogenase, mitochondrial precursor (EC 1.1.1.37) [MASS=35531]                                                                                                                       | 1.00                               | 16.27 | 1.41 | 0.08 | 8 | 4 | 2 | SQETEC[339]TYFSTPLLLGK                           | 1 |
|                                                                                                                                                                                                                    |                                    |       |      |      |   |   | 2 | GYLGPEQLPDC[339]LK                               | 1 |
|                                                                                                                                                                                                                    |                                    |       |      |      |   |   | 2 | TIIP LISQC[330]TPK                               | 1 |
|                                                                                                                                                                                                                    |                                    |       |      |      |   |   | 2 | GC[330]DVVVIPAGVPR                               | 1 |
|                                                                                                                                                                                                                    |                                    |       |      |      |   |   | 3 | GC[339]DVVVIPAGVPR                               | 1 |
| 2                                                                                                                                                                                                                  | GC[339]DVVVIPAGVPR                 | 2     |      |      |   |   |   |                                                  |   |
| MEGF8_HUMAN (Q7Z7M0) Multiple epidermal growth factor-like domains 8 (EGF-like domain-containing protein 4) (Multiple EGF-like domain protein 4) [MASS=254572]                                                     | 0.00                               | 2.51  | 0.62 | 0.00 | 1 | 2 | 3 | EVFWAGNC[330]SEAAC[339]GAADC[339]EQC[339]TR      | 1 |
|                                                                                                                                                                                                                    |                                    |       |      |      |   |   | 3 | SEPFLAPLLLTGAGGPWGP MGGGC[330]C[330]PPAIPATTAGLR | 1 |
| MERL_HUMAN (P35240) Merlin (Moesin-ezrin-radixin-like protein) (Neurofibromin-2) (Schwannomin) (Schwannomerlin) [MASS=69690]                                                                                       | *                                  | 11.76 | *    | *    | * | 4 | 2 | EEATMANEALMR                                     | 1 |
|                                                                                                                                                                                                                    |                                    |       |      |      |   |   | 2 | VNKLILQLC[339]IGNHDLFMRR                         | 1 |
|                                                                                                                                                                                                                    |                                    |       |      |      |   |   | 3 | QPKTFTVRIVTMDAEMFN C[330]EM[147]K                | 1 |
|                                                                                                                                                                                                                    |                                    |       |      |      |   |   | 2 | ERETALDILHNENSDR                                 | 1 |
| MFN2_HUMAN (O95140) Transmembrane GTPase MFN2 (EC 3.6.5.-) (Mitofusin-2) [MASS=86402]                                                                                                                              | *                                  | 3.30  | *    | *    | * | 1 | 3 | LLRNKAGWLDSELNMFTHQYLQPSR                        | 1 |
| MGR2_HUMAN (Q14416) Metabotropic glutamate receptor 2 precursor (mGluR2) [MASS=95567]                                                                                                                              | 0.00                               | 2.75  | 2.81 | 0.00 | 1 | 2 | 3 | C[339]SEPC[339]LQNEVK                            | 1 |
|                                                                                                                                                                                                                    |                                    |       |      |      |   |   | 2 | DFVLNVKFDAPFR                                    | 1 |
| MGST3_HUMAN (O14880) Microsomal glutathione S-transferase 3 (EC 2.5.1.18) (Microsomal GST-3) (Microsomal GST-III) [MASS=16516]                                                                                     | 1.00                               | 48.03 | 0.99 | 0.33 | 7 | 3 | 3 | GALGSIALLGLVGTTCV[330]SAFQHLGWVK                 | 1 |
|                                                                                                                                                                                                                    |                                    |       |      |      |   |   | 3 | VEYPIM[147]YSTDPENGHIFNC[330]IQR                 | 1 |
|                                                                                                                                                                                                                    |                                    |       |      |      |   |   | 3 | VEYPIMYSTDPENGHIFNC[339]IQR                      | 1 |
|                                                                                                                                                                                                                    |                                    |       |      |      |   |   | 3 | YKVEYPIMYSTDPENGHIFNC[330]IQR                    | 1 |
|                                                                                                                                                                                                                    |                                    |       |      |      |   |   | 2 | VEYPIM[147]YSTDPENGHIFNC[330]IQR                 | 1 |
| 3                                                                                                                                                                                                                  | YKVEYPIM[147]YSTDPENGHIFNC[339]IQR | 2     |      |      |   |   |   |                                                  |   |

|                                                                                                                                                                                                                                                       |      |       |      |      |   |   |   |                                            |   |
|-------------------------------------------------------------------------------------------------------------------------------------------------------------------------------------------------------------------------------------------------------|------|-------|------|------|---|---|---|--------------------------------------------|---|
| MICA2_HUMAN (O94851) Protein MICAL-2 [MASS=126688]                                                                                                                                                                                                    | 0.00 | 4.72  | 0.86 | 0.00 | 1 | 3 | 3 | KFYGKFC[330]AGSIDHISIR                     | 1 |
|                                                                                                                                                                                                                                                       |      |       |      |      |   |   | 3 | DCJ[330]THYFVMTAKKQSLDDK                   | 1 |
|                                                                                                                                                                                                                                                       |      |       |      |      |   |   | 2 | SDLQLGGTENFATLPSTR                         | 1 |
| MINK1_HUMAN (Q8N4C8) Misshapen-like kinase 1 (EC 2.7.11.1) (Mitogen-activated protein kinase kinase kinase kinase 6) (MAPK/ERK kinase kinase 6) (MEK kinase kinase 6) (MEKKK 6) (Misshapen/NIK-related kinase) (GCK family kinase MiNK) [MASS=149808] | *    | 2.63  | *    | *    | * | 2 | 2 | QRRIEEQK                                   | 1 |
|                                                                                                                                                                                                                                                       |      |       |      |      |   |   | 3 | SDIWSLGITAIEM[147]AEGAPPLC[330]DM[147]HMPR | 1 |
| MKNK2_HUMAN (Q9HBH9) MAP kinase-interacting serine/threonine-protein kinase 2 (EC 2.7.11.1) (MAP kinase signal-integrating kinase 2) (Mnk2) [MASS=51875]                                                                                              | 0.00 | 2.37  | 6.01 | 0.00 | 1 | 1 | 2 | C[339]LQLSPPSQSK                           | 1 |
| MLL2_HUMAN (O14686) Myeloid/lymphoid or mixed-lineage leukemia protein 2 (ALL1-related protein) [MASS=564181]                                                                                                                                         | *    | 1.20  | *    | *    | * | 4 | 3 | PGTPGEGM[147]LSSDLDR                       | 1 |
|                                                                                                                                                                                                                                                       |      |       |      |      |   |   | 2 | AKNVQLSTGQGSEGLR                           | 1 |
|                                                                                                                                                                                                                                                       |      |       |      |      |   |   | 2 | PDKVPRDMR                                  | 1 |
|                                                                                                                                                                                                                                                       |      |       |      |      |   |   | 3 | REANGEPIGAPGTSNHLLLAGPR                    | 1 |
|                                                                                                                                                                                                                                                       |      |       |      |      |   |   | 1 | TFPGIPK                                    | 6 |
| MMP3_HUMAN (P08254) Stromelysin-1 precursor (EC 3.4.24.17) (Matrix metalloproteinase-3) (MMP-3) (Transin-1) (SL-1) [MASS=53977]                                                                                                                       | *    | 1.47  | *    | *    | * | 1 |   |                                            |   |
| MMSA_HUMAN (Q02252) Methylmalonate-semialdehyde dehydrogenase [acylating], mitochondrial precursor (EC 1.2.1.27) (MMSDH) (Malonate-semialdehyde dehydrogenase [acylating]) (EC 1.2.1.18) [MASS=57839]                                                 | 0.91 | 10.28 | 0.98 | 0.00 | 1 | 2 | 3 | LLQDSGAPDGTLNIIHGQHEAVNFIC[339]DHPDIK      | 1 |
|                                                                                                                                                                                                                                                       |      |       |      |      |   |   | 2 | NLRVNAGDQPGADLGPLITPQAK                    | 1 |
| MOG_HUMAN (Q16653) Myelin-oligodendrocyte glycoprotein precursor [MASS=28179]                                                                                                                                                                         | 0.83 | 4.86  | 1.93 | 0.00 | 1 | 1 | 2 | FSDEGGFTC[339]FFR                          | 1 |
| MOK_HUMAN (Q9UQ07) MAPK/MAK/MRK overlapping kinase (EC 2.7.11.22) (MOK protein kinase) (Renal tumor antigen 1) (RAGE-1) [MASS=48013]                                                                                                                  | 0.00 | 5.49  | 1.37 | 0.00 | 1 | 2 | 3 | AIGKIGEGTFSEVMK                            | 1 |
|                                                                                                                                                                                                                                                       |      |       |      |      |   |   | 2 | DGNYYAC[339]K                              | 1 |

|                                                                                                                                                                                                                                                                               |      |       |      |      |   |   |   |                                                    |   |
|-------------------------------------------------------------------------------------------------------------------------------------------------------------------------------------------------------------------------------------------------------------------------------|------|-------|------|------|---|---|---|----------------------------------------------------|---|
| MORC3_HUMAN (Q14149) MORC family CW-type zinc finger 3 (Zinc finger CW-type coiled-coil domain protein 3) [MASS=107112]                                                                                                                                                       | 0.00 | 9.58  | 1.34 | 0.00 | 1 | 4 | 3 | ESVPRRHLSEGTNSYATR                                 | 1 |
|                                                                                                                                                                                                                                                                               |      |       |      |      |   |   | 3 | AEC[339]SQC[339]SNNESKSEM[147]DEM[147]AVQLDDVFR    | 1 |
|                                                                                                                                                                                                                                                                               |      |       |      |      |   |   | 3 | SEVELLEMEKSQLRSQC[339]EELK                         | 1 |
|                                                                                                                                                                                                                                                                               |      |       |      |      |   |   | 2 | VGC[339]QLRANNM[147]GVGVVGIIEC[330]NFLK            | 1 |
|                                                                                                                                                                                                                                                                               |      |       |      |      |   |   | 3 | AEC[339]SQC[330]SNNESKSEM[147]DEM[147]AVQLDDVFR    | 1 |
| MORC4_HUMAN (Q8TE76) MORC family CW-type zinc finger 4 (Zinc finger CW-type coiled-coil domain protein 2) [MASS=106347]                                                                                                                                                       | 0.00 | 2.35  | 0.98 | 0.00 | 1 | 1 | 3 | ITFGFSC[330]KNSNQFGIM[147]M[147]YHNNR              | 1 |
| MOS1B_HUMAN (Q9NZB8) Molybdenum cofactor biosynthesis protein 1 B (MOCS1B) (Molybdenum cofactor synthesis-step 1 protein A-B) (Molybdenum cofactor biosynthesis protein C) [MASS=70105]                                                                                       | 0.00 | 3.93  | 0.49 | 0.00 | 1 | 1 | 2 | GPTGVEM[147]EALTSAAVAALTYDM[147]C[330]K            | 1 |
| MPRI_HUMAN (P11717) Cation-independent mannose-6-phosphate receptor precursor (CI Man-6-P receptor) (CI-MPR) (M6PR) (Insulin-like growth factor 2 receptor) (Insulin-like growth factor II receptor) (IGF-II receptor) (M6P/IGF2 receptor) (M6P/IGF2R) (300 kD) [MASS=274274] | *    | 4.98  | *    | *    | * | 6 | 3 | INIC[330]GSVDIVQC[330]GPSSAVC[339]MHDLKTR          | 1 |
|                                                                                                                                                                                                                                                                               |      |       |      |      |   |   | 3 | TWNLGLSNAKLSYYDGM[147]IQLNYRGGTPYNNER              | 1 |
|                                                                                                                                                                                                                                                                               |      |       |      |      |   |   | 2 | DGIIVLKYVDGDLG[330]PDGIRK                          | 1 |
|                                                                                                                                                                                                                                                                               |      |       |      |      |   |   | 2 | PQEVQMVNGTITNPINGKSFSLGDIYFK                       | 1 |
|                                                                                                                                                                                                                                                                               |      |       |      |      |   |   | 2 | FISSPMKEK                                          | 1 |
|                                                                                                                                                                                                                                                                               |      |       |      |      |   |   | 2 | LTYENGLLK                                          | 1 |
| MRC2_HUMAN (Q9UBG0) Macrophage mannose receptor 2 precursor (Urokinase receptor-associated protein) (Endocytic receptor 180) (CD280 antigen) [MASS=166654]                                                                                                                    | *    | 2.03  | *    | *    | * | 1 | 3 | LFNLGTM[147]QC[339]LGTGWPGTNTTASLGM[147]YEC[330]DR | 1 |
| MSAP_HUMAN (Q9Y2B0) MIR-interacting saposin-like protein precursor (Transmembrane protein 4) (Putative secreted protein ZSIG9) [MASS=20652]                                                                                                                                   | 0.45 | 5.49  | 2.12 | 0.00 | 1 | 1 | 2 | SQDLHC[339]GAC[339]JR                              | 1 |
| MTA3_HUMAN (Q9BTC8) Metastasis-associated protein MTA3 [MASS=67503]                                                                                                                                                                                                           | 0.00 | 3.54  | 0.37 | 0.00 | 1 | 1 | 3 | IEELNKTASGNVEAKVVC[330]FYR                         | 1 |
| MTMR6_HUMAN (Q9Y217) Myotubularin-related protein 6 (EC 3.1.3.-) [MASS=71953]                                                                                                                                                                                                 | 0.00 | 3.06  | 0.28 | 0.00 | 1 | 1 | 3 | AITVENASVLVHC[330]SDGWDR                           | 1 |
| MTMRD_HUMAN (Q86WG5) Myotubularin-related protein 13 (SET-binding factor 2) [MASS=208463]                                                                                                                                                                                     | 0.00 | 2.54  | 0.13 | 0.00 | 1 | 2 | 2 | SLHC[330]MIPGIVAM[147]HIETLEAVHR                   | 1 |
|                                                                                                                                                                                                                                                                               |      |       |      |      |   |   | 3 | VTTVFNSAQRLEVVRNC[330]ISFIFENK                     | 1 |
| MTPN_HUMAN (P58546) Myotrophin (Protein V-1) [MASS=12764]                                                                                                                                                                                                                     | 0.00 | 16.24 | 0.22 | 0.00 | 1 | 1 | 3 | HHITPLLSAVYEGHVSC[330]VK                           | 1 |



|                                                                                                                                                                                                                             |      |      |      |      |   |   |   |                                           |   |
|-----------------------------------------------------------------------------------------------------------------------------------------------------------------------------------------------------------------------------|------|------|------|------|---|---|---|-------------------------------------------|---|
| MX2_HUMAN (P20592) Interferon-induced GTP-binding protein Mx2 (Interferon-regulated resistance GTP-binding protein MxB) (p78-related protein) [MASS=82088]                                                                  | 0.00 | 2.52 | 0.62 | 0.00 | 1 | 1 | 3 | M[147]EQM[147]VFC[330]QDQIYSVVLKK         | 1 |
|                                                                                                                                                                                                                             |      |      |      |      |   |   | 2 | FSMVM[147]SLDFNATGR                       | 1 |
|                                                                                                                                                                                                                             |      |      |      |      |   |   | 2 | TQFSSC[330]ESLLESRPSMGR                   | 1 |
| MY18B_HUMAN (Q8IUG5) Myosin-18B (Myosin XVIIIb) [MASS=285183]                                                                                                                                                               | 0.61 | 4.17 | 1.07 | 0.00 | 1 | 6 | 3 | IADLTSDLADERFK                            | 1 |
|                                                                                                                                                                                                                             |      |      |      |      |   |   | 2 | EGVLLSKAEK                                | 1 |
|                                                                                                                                                                                                                             |      |      |      |      |   |   | 2 | QNTDLLESKIADLTSDLADER                     | 1 |
|                                                                                                                                                                                                                             |      |      |      |      |   |   | 3 | SFSSHLSM[147]ASIM[147]VVDSPGFQNP RHQ GKDR | 1 |
| MYCN_HUMAN (P04198) N-myc proto-oncogene protein [MASS=49561]                                                                                                                                                               | 0.00 | 3.23 | 1.43 | 0.00 | 1 | 1 | 2 | MPSC[339]STSTM[147]PGMIC[339]K            | 1 |
| MYH9_HUMAN (P35579) Myosin-9 (Myosin heavy chain, nonmuscle IIa) (Nonmuscle myosin heavy chain IIa) (NMMHC II-a) (NMMHC-IIA) (Cellular myosin heavy chain, type A) (Nonmuscle myosin heavy chain-A) (NMMHC-A) [MASS=226400] | *    | 2.14 | *    | *    | * | 2 | 2 | LEGDSTDLSQIAELQAQIAELKM[147]QLAK          | 1 |
|                                                                                                                                                                                                                             |      |      |      |      |   |   | 2 | NLPIYSEEIVEMYK                            | 1 |
| MYO5A_HUMAN (Q9Y411) Myosin-5A (Myosin Va) (Dilute myosin heavy chain, non-muscle) (Myosin heavy chain 12) (Myosin) [MASS=215420]                                                                                           | 0.00 | 2.96 | 1.20 | 0.00 | 1 | 3 | 3 | NPDILVGENDLTALSYLHEPAVLHNLR               | 1 |
|                                                                                                                                                                                                                             |      |      |      |      |   |   | 2 | C[339]IKPNDFK                             | 1 |
|                                                                                                                                                                                                                             |      |      |      |      |   |   | 2 | QLNSFHSVMC[339]QHGM DP ELIK               | 1 |
| MYO7A_HUMAN (Q13402) Myosin-7A (Myosin VIIa) [MASS=254404]                                                                                                                                                                  | *    | 2.75 | *    | *    | * | 3 | 3 | TKQRGDFPTDC[330]VYVMPVTM[147]PPR          | 1 |
|                                                                                                                                                                                                                             |      |      |      |      |   |   | 2 | VSSLGSGSDHVM DAISQC[339]EQYAK             | 1 |
|                                                                                                                                                                                                                             |      |      |      |      |   |   | 2 | KPIMLPVTFM[147]DGTTK                      | 1 |
|                                                                                                                                                                                                                             |      |      |      |      |   |   | 2 | ELIGMDPVAVFRWAVLRAAIR                     | 1 |
| MYO9B_HUMAN (Q13459) Myosin-9B (Myosin IXb) (Unconventional myosin-9b) [MASS=243556]                                                                                                                                        | 0.00 | 3.80 | 0.58 | 0.00 | 1 | 5 | 2 | MSPGALAIIFAPC[330]LLR                     | 1 |
|                                                                                                                                                                                                                             |      |      |      |      |   |   | 3 | PDSPGGSTQIQR                              | 1 |
|                                                                                                                                                                                                                             |      |      |      |      |   |   | 2 | VQEKPDSPGGSTQIQR YLDAER                   | 1 |
|                                                                                                                                                                                                                             |      |      |      |      |   |   | 3 | YTG MLETVRIR                              | 2 |
| MYPN_HUMAN (Q86TC9) Myopalladin (145 kDa sarcomeric protein) [MASS=145256]                                                                                                                                                  | 0.00 | 3.79 | 0.75 | 0.00 | 1 | 3 | 2 | MLQNLSASEGQLVVFEC[339]R                   | 1 |
|                                                                                                                                                                                                                             |      |      |      |      |   |   | 2 | LKHFRVTEGSPVFTFC[339]K                    | 1 |
|                                                                                                                                                                                                                             |      |      |      |      |   |   | 2 | HFRVTEGSPVFTFC[330]K                      | 1 |

|                                                                                                                                                                                                                                                                              |      |       |      |      |    |   |   |                               |   |
|------------------------------------------------------------------------------------------------------------------------------------------------------------------------------------------------------------------------------------------------------------------------------|------|-------|------|------|----|---|---|-------------------------------|---|
|                                                                                                                                                                                                                                                                              |      |       |      |      |    |   | 2 | VC[330]GSNLLSIC[330]K         | 2 |
|                                                                                                                                                                                                                                                                              |      |       |      |      |    |   | 2 | VC[339]GSNLLSIC[339]K         | 2 |
| MYPR_HUMAN (P60201) Myelin proteolipid protein (PLP) (Lipophilin) [MASS=29946]                                                                                                                                                                                               | 1.00 | 13.41 | 1.51 | 0.13 | 11 | 4 | 1 | TSASIGSLC[339]ADAR            | 2 |
|                                                                                                                                                                                                                                                                              |      |       |      |      |    |   | 2 | VC[339]HC[339]LGK             | 1 |
|                                                                                                                                                                                                                                                                              |      |       |      |      |    |   | 2 | TTIC[339]GK                   | 1 |
|                                                                                                                                                                                                                                                                              |      |       |      |      |    |   | 2 | TSASIGSLC[330]ADAR            | 1 |
|                                                                                                                                                                                                                                                                              |      |       |      |      |    |   | 2 | VC[330]HC[330]LGK             | 1 |
|                                                                                                                                                                                                                                                                              |      |       |      |      |    |   | 2 | TSASIGSLC[339]ADAR            | 2 |
| MYST4_HUMAN (Q8WYB5) Histone acetyltransferase MYST4 (EC 2.3.1.48) (EC 2.3.1.-) (MYST protein 4) (MOZ, YBF2/SAS3, SAS2 and TIP60 protein 4) (Histone acetyltransferase MOZ2) (Monocytic leukemia zinc finger protein-related factor) (Histone acetyltransferas [MASS=231343] | *    | 3.52  | *    | *    | *  | 6 | 2 | QAQELSWEK                     | 1 |
|                                                                                                                                                                                                                                                                              |      |       |      |      |    |   | 3 | INIKQESADVNVIGNK              | 1 |
|                                                                                                                                                                                                                                                                              |      |       |      |      |    |   | 2 | REKLILSHM[147]JEK             | 1 |
|                                                                                                                                                                                                                                                                              |      |       |      |      |    |   | 2 | QSC[330]TSHVLATGTTQKLK        | 1 |
|                                                                                                                                                                                                                                                                              |      |       |      |      |    |   | 3 | LQTQIASKGHISMR                | 1 |
|                                                                                                                                                                                                                                                                              |      |       |      |      |    |   | 1 | TTFLKK                        | 1 |
| N4BM_HUMAN (O95298) NADH-ubiquinone oxidoreductase subunit B14.5b (EC 1.6.5.3) (EC 1.6.99.3) (Complex I-B14.5b) (CI-B14.5b) [MASS=14187]                                                                                                                                     | 0.30 | 15.97 | 0.81 | 0.00 | 1  | 1 | 2 | LLYIGFLGYC[339]SGLIDNLIR      | 1 |
| NADE1_HUMAN (Q6IA69) Glutamine-dependent NAD(+) synthetase (EC 6.3.5.1) (NAD(+) synthase [glutamine-hydrolyzing]) (NAD(+) synthetase 1) [MASS=79293]                                                                                                                         | *    | 2.83  | *    | *    | *  | 1 | 3 | ELAQQIGSHHISLNIDPAVK          | 1 |
| NAL14_HUMAN (Q86W24) NACHT, LRR and PYD-containing protein 14 (Nucleotide-binding oligomerization domain protein 5) [MASS=124732]                                                                                                                                            | *    | 2.74  | *    | *    | *  | 2 | 2 | RLIKM[147]NLTQNTLGYEGIVK      | 1 |
|                                                                                                                                                                                                                                                                              |      |       |      |      |    |   | 2 | C[330]FLFGLLNEDR              | 1 |
| NALP6_HUMAN (P59044) NACHT, LRR and PYD-containing protein 6 (PYRIN-containing APAF1-like protein 5) [MASS=98733]                                                                                                                                                            | *    | 3.70  | *    | *    | *  | 2 | 3 | RLQRLGLGSGTLLSVSEYK           | 1 |
|                                                                                                                                                                                                                                                                              |      |       |      |      |    |   | 3 | C[330]C[330]PAGQALRLISC[330]R | 1 |

|                                                                                                                                                                                                                                                           |      |      |      |      |   |   |   |                                           |   |
|-----------------------------------------------------------------------------------------------------------------------------------------------------------------------------------------------------------------------------------------------------------|------|------|------|------|---|---|---|-------------------------------------------|---|
| NBEAL_HUMAN (Q6ZS30) Neurobeachin-like 1 (Amyotrophic lateral sclerosis 2 chromosomal region candidate gene 17 protein) [MASS=150732]                                                                                                                     | 0.00 | 6.01 | 0.85 | 0.00 | 1 | 5 | 3 | VEPFTTLHIQLQSGRFDC[330]ADR                | 1 |
|                                                                                                                                                                                                                                                           |      |      |      |      |   |   | 2 | DC[339]YEALMVNM[147]HK                    | 1 |
|                                                                                                                                                                                                                                                           |      |      |      |      |   |   | 3 | EEQDQKEKLVLM[147]EDC[339]ELITIIDVIPGR     | 1 |
|                                                                                                                                                                                                                                                           |      |      |      |      |   |   | 3 | YENFEDPMGTIDK                             | 1 |
|                                                                                                                                                                                                                                                           |      |      |      |      |   |   | 1 | NAKAMR                                    | 1 |
|                                                                                                                                                                                                                                                           |      |      |      |      |   |   | 2 | FFLC[330]QVAGDAK                          | 3 |
| NCA11_HUMAN (P13591) Neural cell adhesion molecule 1, 140 kDa isoform precursor (N-CAM 140) (NCAM-140) (CD56 antigen) [MASS=93360]                                                                                                                        | 1.00 | 8.49 | 0.51 | 0.31 | 9 | 4 | 2 | KVDKNDEAEYIC[330]IAENK                    | 2 |
|                                                                                                                                                                                                                                                           |      |      |      |      |   |   | 2 | FFLC[339]QVAGDAK                          | 1 |
|                                                                                                                                                                                                                                                           |      |      |      |      |   |   | 3 | KVDKNDEAEYIC[330]IAENK                    | 1 |
|                                                                                                                                                                                                                                                           |      |      |      |      |   |   | 3 | GPVEAKPEC[330]QETETKPAPAEVK               | 1 |
|                                                                                                                                                                                                                                                           |      |      |      |      |   |   | 3 | PAPAEVKTVPNDATQTKENESK                    | 1 |
|                                                                                                                                                                                                                                                           |      |      |      |      |   |   | 2 | KVDKNDEAEYIC[339]IAENK                    | 1 |
| NCAM2_HUMAN (O15394) Neural cell adhesion molecule 2 precursor (N-CAM 2) [MASS=92932]                                                                                                                                                                     | 0.99 | 7.05 | 0.89 | 0.00 | 1 | 3 | 3 | GSNTELTVRNIINSDGGPYVC[339]RATNK           | 1 |
|                                                                                                                                                                                                                                                           |      |      |      |      |   |   | 2 | LIEENEKYILKGSNTELTVR                      | 1 |
|                                                                                                                                                                                                                                                           |      |      |      |      |   |   | 2 | NIINSDGGPYVC[330]R                        | 1 |
| NCKX5_HUMAN (Q71RS6) Sodium/potassium/calcium exchanger 5 precursor (Na(+)/K(+)/Ca(2+)-exchange protein 5) (Solute carrier family 24 member 5) [MASS=54888]                                                                                               | 0.00 | 5.20 | 1.80 | 0.00 | 1 | 1 | 2 | GDMAM[147]SNIVGSNVFDM[147]LC[339]LGIPWFIK | 1 |
|                                                                                                                                                                                                                                                           |      |      |      |      |   |   |   |                                           |   |
| NCOA5_HUMAN (Q9HCD5) Nuclear receptor coactivator 5 (NCoA-5) (Coactivator independent of AF-2) (CIA) [MASS=65536]                                                                                                                                         | 0.00 | 9.67 | 0.54 | 0.00 | 1 | 3 | 2 | NM[147]PQADAMVLVARNYERYK                  | 1 |
|                                                                                                                                                                                                                                                           |      |      |      |      |   |   | 1 | YLTAETEDK                                 | 1 |
|                                                                                                                                                                                                                                                           |      |      |      |      |   |   | 3 | SC[330]TVNIMFGTPEHRNMPQADAMVLVAR          | 1 |
| NDRG1_HUMAN (Q92597) Protein NDRG1 (N-myc downstream-regulated gene 1 protein) (Differentiation-related gene 1 protein) (DRG-1) (Reducing agents and tunicamycin-responsive protein) (RTP) (Nickel-specific induction protein Cap43) (Rit42) [MASS=42835] | 0.00 | 5.08 | 3.32 | 0.00 | 1 | 1 | 3 | TTLLKM[147]ADC[339]GGLPQISQPAK            | 1 |
| NDRG2_HUMAN (Q9UN36) Protein NDRG2 (Protein Syld709613) [MASS=40798]                                                                                                                                                                                      | 0.69 | 8.89 | *    | *    | * | 2 | 2 | LDPTQTSFLK                                | 1 |
|                                                                                                                                                                                                                                                           |      |      |      |      |   |   | 3 | C[339]PVMLVVGDAQPHEDAVVEC[330]NSK         | 1 |
| NDUA2_HUMAN (O43678) NADH dehydrogenase [ubiquinone] 1 alpha subcomplex subunit 2 (EC 1.6.5.3) (EC 1.6.99.3) (NADH-ubiquinone oxidoreductase B8 subunit) (Complex I-B8) (CI-B8) [MASS=10790]                                                              | 1.00 | 6.12 | 1.42 | 0.06 | 4 | 1 | 2 | IHLC[339]QR                               | 2 |
|                                                                                                                                                                                                                                                           |      |      |      |      |   |   | 2 | IHLC[330]QR                               | 2 |

|                                                                                                                                                                                                                                 |      |       |      |      |   |   |                                                                         |             |   |
|---------------------------------------------------------------------------------------------------------------------------------------------------------------------------------------------------------------------------------|------|-------|------|------|---|---|-------------------------------------------------------------------------|-------------|---|
| NDUA8_HUMAN (P51970) NADH dehydrogenase [ubiquinone] 1 alpha subcomplex subunit 8 (EC 1.6.5.3) (EC 1.6.99.3) (NADH-ubiquinone oxidoreductase 19 kDa subunit) (Complex I-19KD) (CI-19KD) (Complex I-PGIV) (CI-PGIV) [MASS=19974] | *    | 3.51  | *    | *    | * | 1 | 1                                                                       | C[339]LEEGK | 1 |
| NDUAA_HUMAN (O95299) NADH dehydrogenase [ubiquinone] 1 alpha subcomplex subunit 10, mitochondrial precursor (EC 1.6.5.3) (EC 1.6.99.3) (NADH-ubiquinone oxidoreductase 42 kDa subunit) (Complex I-42KD) (CI-42KD) [MASS=40750]  | 1.00 | 11.83 | 1.27 | 0.01 | 2 | 3 | 2 KQC[330]VDHYNEVK<br>2 QC[330]VDHYNEVK<br>2 GDPHEM[147]KITSAYLQDIENAYK | 1<br>1<br>1 |   |
| NDUB7_HUMAN (P17568) NADH dehydrogenase [ubiquinone] 1 beta subcomplex subunit 7 (EC 1.6.5.3) (EC 1.6.99.3) (NADH-ubiquinone oxidoreductase B18 subunit) (Complex I-B18) (CI-B18) (Cell adhesion protein SQM1) [MASS=16271]     | 1.00 | 14.71 | 1.12 | 0.05 | 5 | 2 | 2 DYC[330]AHHLIR<br>2 DYC[339]AHHLIR<br>2 RDSFPNFLAC[339]K              | 2<br>2<br>1 |   |
| NDUBA_HUMAN (O96000) NADH dehydrogenase [ubiquinone] 1 beta subcomplex subunit 10 (EC 1.6.5.3) (EC 1.6.99.3) (NADH-ubiquinone oxidoreductase PDSW subunit) (Complex I-PDSW) (CI-PDSW) [MASS=20645]                              | 0.21 | 12.87 | 1.41 | 0.00 | 1 | 2 | 2 KAAKEAAAATS<br>2 EGQNYQQNC[339]IK                                     | 1<br>1      |   |

|                                                                                                                                                                                                               |      |      |      |      |   |    |  |   |                                        |   |
|---------------------------------------------------------------------------------------------------------------------------------------------------------------------------------------------------------------|------|------|------|------|---|----|--|---|----------------------------------------|---|
|                                                                                                                                                                                                               |      |      |      |      |   |    |  | 3 | DKTQIHMPDTPPEIMLAR                     | 1 |
|                                                                                                                                                                                                               |      |      |      |      |   |    |  | 3 | YKQSAEMEKANFTSVVDTPEIIHAQVVK           | 1 |
|                                                                                                                                                                                                               |      |      |      |      |   |    |  | 3 | DKTTIHVMPDTPDILLSR                     | 1 |
|                                                                                                                                                                                                               |      |      |      |      |   |    |  | 1 | M[147]VGFR                             | 1 |
|                                                                                                                                                                                                               |      |      |      |      |   |    |  | 3 | IMWSLHIAKVQSDREYK                      | 1 |
|                                                                                                                                                                                                               |      |      |      |      |   |    |  | 3 | YNTPHDMFNVVAAKKAQDVVSNVNYK             | 1 |
|                                                                                                                                                                                                               |      |      |      |      |   |    |  | 2 | TIHVMPDTPPEIM[147]LAKLNR               | 1 |
|                                                                                                                                                                                                               |      |      |      |      |   |    |  | 3 | GKPM[147]LDFETPTYITAKESQQMQSGK         | 1 |
|                                                                                                                                                                                                               |      |      |      |      |   |    |  | 3 | NYLHQWTC[330]MPDQNDVIQAKKAYELQSDNVYK   | 1 |
|                                                                                                                                                                                                               |      |      |      |      |   |    |  | 2 | SLQDDPKLVLSMNVAK                       | 3 |
| NEBU_HUMAN (P20929) Nebulin<br>[MASS=773208]                                                                                                                                                                  | 0.00 | 5.43 | 0.52 | 0.00 | 1 | 19 |  |   |                                        |   |
|                                                                                                                                                                                                               |      |      |      |      |   |    |  | 2 | RASEIIEK                               | 1 |
|                                                                                                                                                                                                               |      |      |      |      |   |    |  | 2 | GAWEGTKAYGYTLDERYIPIVGAK               | 1 |
|                                                                                                                                                                                                               |      |      |      |      |   |    |  | 2 | EDYENKIK                               | 1 |
|                                                                                                                                                                                                               |      |      |      |      |   |    |  | 3 | QHPDTPVFTSVPDSMGMLLAQHNTK              | 1 |
|                                                                                                                                                                                                               |      |      |      |      |   |    |  | 3 | TSYHTPGDM[147]VTITAAKM[147]AQDVATNVNYK | 1 |
|                                                                                                                                                                                                               |      |      |      |      |   |    |  | 2 | ADLKDSLK                               | 1 |
|                                                                                                                                                                                                               |      |      |      |      |   |    |  | 2 | GYDLPVDAISVQLAKASRDIASDYK              | 1 |
|                                                                                                                                                                                                               |      |      |      |      |   |    |  | 3 | MQDLFSPNKYKEK                          | 1 |
|                                                                                                                                                                                                               |      |      |      |      |   |    |  | 3 | FMPYIAHSQKM[147]QDLFSPNK               | 1 |
| NEGR1_HUMAN (Q7Z3B1) Neuronal growth<br>regulator 1 precursor [MASS=38719]                                                                                                                                    | 0.00 | 5.93 | 0.83 | 0.00 | 1 | 1  |  | 2 | DQAGEYEC[339]SAENDVSFPDVRK             | 1 |
| NEK4_HUMAN (P51957) Serine/threonine-<br>protein kinase Nek4 (EC 2.7.11.1) (NimA-<br>related protein kinase 4) (Serine/threonine-<br>protein kinase 2) (Serine/threonine-protein<br>kinase NRK2) [MASS=94571] | *    | 2.02 | *    | *    | * | 1  |  | 2 | LPAM[147]PRDYSPELAELIR                 | 1 |
| NELL2_HUMAN (Q99435) Protein kinase C-<br>binding protein NELL2 precursor (NEL-like<br>protein 2) (Nel-related protein 2)<br>[MASS=91346]                                                                     | *    | 3.06 | *    | *    | * | 2  |  | 2 | M[147]ESRVLLR                          | 1 |
|                                                                                                                                                                                                               |      |      |      |      |   |    |  | 2 | IMELQDILAKTSAKLSR                      | 1 |
| NF1_HUMAN (P21359) Neurofibromin<br>(Neurofibromatosis-related protein NF-1)<br>[Contains: Neurofibromin truncated]<br>[MASS=319370]                                                                          | 0.00 | 3.10 | 0.53 | 0.00 | 1 | 6  |  | 3 | YFTLFMNLND[330]SEVEDESAQTGGRK          | 1 |
|                                                                                                                                                                                                               |      |      |      |      |   |    |  | 3 | ALKKVAQLAVINSLEK                       | 1 |
|                                                                                                                                                                                                               |      |      |      |      |   |    |  | 3 | FMDRLLSLMVC[339]NHEKVGLQIR             | 1 |
|                                                                                                                                                                                                               |      |      |      |      |   |    |  | 2 | SYKYLKLSMVK                            | 1 |
|                                                                                                                                                                                                               |      |      |      |      |   |    |  | 2 | AVGRRPFDK                              | 1 |
|                                                                                                                                                                                                               |      |      |      |      |   |    |  | 1 | GMSRR                                  | 1 |

|                                                                                                                                                                                      |      |       |      |      |   |   |   |                                           |   |
|--------------------------------------------------------------------------------------------------------------------------------------------------------------------------------------|------|-------|------|------|---|---|---|-------------------------------------------|---|
| NF2L2_HUMAN (Q16236) Nuclear factor erythroid 2-related factor 2 (NF-E2-related factor 2) (NFE2-related factor 2) (Nuclear factor, erythroid derived 2, like 2) (HEBP1) [MASS=67826] | *    | 4.46  | *    | *    | * | 1 | 3 | IINLPVVDNFNEMM[147]SKEQFNEAQLALIR         | 1 |
| NFASC_HUMAN (O94856) Neurofascin precursor [MASS=150026]                                                                                                                             | 1.00 | 7.28  | 0.61 | 0.28 | 2 | 5 | 3 | VRVMNSTAISLQWNRVYSDTVQGQLR                | 1 |
|                                                                                                                                                                                      |      |       |      |      |   |   | 2 | VRVMNSTAISLQWNR                           | 1 |
|                                                                                                                                                                                      |      |       |      |      |   |   | 3 | TRLDC[330]PFFGSPIPTLR                     | 1 |
|                                                                                                                                                                                      |      |       |      |      |   |   | 2 | KEDQGIYTC[330]VATNILGK                    | 1 |
|                                                                                                                                                                                      |      |       |      |      |   |   | 2 | GPEPESVIGYSGEDYPRAAPTEVK                  | 1 |
| NFIB_HUMAN (O00712) Nuclear factor 1 B-type (Nuclear factor 1/B) (NF1-B) (NFI-B) (NF-I/B) (CCAAT-box-binding transcription factor) (CTF) (TGGCA-binding protein) [MASS=47442]        | *    | 10.48 | *    | *    | * | 3 | 2 | HPC[339]C[339]VLSNPDQK GK                 | 2 |
|                                                                                                                                                                                      |      |       |      |      |   |   | 2 | TWHERDQDM[147]SSPTTMK                     | 1 |
|                                                                                                                                                                                      |      |       |      |      |   |   | 3 | GIPLESTDGERLMK                            | 1 |
| NIFUN_HUMAN (Q9H1K1) NifU-like N-terminal domain-containing protein, mitochondrial precursor (NifU-like protein) (Iron-sulfur cluster assembly enzyme ISCU) [MASS=17937]             | *    | 13.77 | *    | *    | * | 1 | 3 | TVEEALTIKNTDIAKELC[330]LPPVK              | 1 |
| NIPM_HUMAN (O43920) NADH-ubiquinone oxidoreductase 15 kDa subunit (EC 1.6.5.3) (EC 1.6.99.3) (Complex I-15 kDa) (CI-15 kDa) [MASS=12386]                                             | 0.94 | 5.71  | 1.25 | 0.00 | 1 | 1 | 2 | C[339]HAFEK                               | 1 |
| NIPS1_HUMAN (Q9BPW8) Protein NipSnap1 [MASS=33310]                                                                                                                                   | *    | 3.17  | *    | *    | * | 1 | 2 | MGPNIYELR                                 | 1 |
| NIPS2_HUMAN (O75323) Protein NipSnap2 (Glioblastoma amplified sequence) [MASS=33742]                                                                                                 | 0.96 | 5.59  | 1.21 | 0.00 | 1 | 1 | 2 | LQFHNVKPEC[339]LEAYNK                     | 1 |
| NKRF_HUMAN (O15226) NF-kappa-B-repressing factor (NFKB-repressing factor) (Transcription factor NRF) (ITBA4 protein) [MASS=77672]                                                    | 0.00 | 8.84  | 0.14 | 0.00 | 1 | 4 | 3 | SSQC[330]HTGSSPR                          | 1 |
|                                                                                                                                                                                      |      |       |      |      |   |   | 2 | KM[147]GWTGGGLGKSGEGIR                    | 1 |
|                                                                                                                                                                                      |      |       |      |      |   |   | 2 | TVKYEAAGEAVKTLK                           | 1 |
|                                                                                                                                                                                      |      |       |      |      |   |   | 2 | C[330]QNIYLTG YAGSKNGSR                   | 1 |
| NKTR_HUMAN (P30414) NK-tumor recognition protein (Natural-killer cells cyclophilin-related protein) (NK-TR protein) [MASS=165675]                                                    | 0.00 | 1.98  | 1.00 | 0.04 | 2 | 2 | 3 | SDSYHRGRSYNR                              | 2 |
|                                                                                                                                                                                      |      |       |      |      |   |   | 2 | EPVGRIMFQLFSDIC[330]PK                    | 2 |
| NKX32_HUMAN (P78367) Homeobox protein Nkx-3.2 (Bagpipe homeobox protein homolog 1) [MASS=34814]                                                                                      | 0.00 | 41.44 | 0.74 | 0.00 | 1 | 5 | 3 | GAHVSALC[330]SGAGGGGGSGPAGVAEEEEPAAPKPRK  | 1 |
|                                                                                                                                                                                      |      |       |      |      |   |   | 2 | DAGALGGAEDSLLASPAGTR                      | 1 |
|                                                                                                                                                                                      |      |       |      |      |   |   | 3 | GAHVSALC[330]SGAGGGGGSGPAGVAEEEEPAAPKPR   | 1 |
|                                                                                                                                                                                      |      |       |      |      |   |   | 2 | RQMAADLLASAPAAK                           | 1 |
|                                                                                                                                                                                      |      |       |      |      |   |   | 3 | EERGGLAPEGRPAPGGTAASVAAAPAVC[339]C[330]WR | 1 |

|                                                                                                                                                                                                                      |      |      |      |      |   |   |   |                                         |    |
|----------------------------------------------------------------------------------------------------------------------------------------------------------------------------------------------------------------------|------|------|------|------|---|---|---|-----------------------------------------|----|
| NLGN1_HUMAN (Q8N2Q7) Neuroligin-1 precursor [MASS=93835]                                                                                                                                                             | 0.00 | 2.86 | 1.34 | 0.00 | 1 | 1 | 3 | GLGAPLTLC[339]M[147]LGC[339]LLQAGHVLSQK | 1  |
| NLTP_HUMAN (P22307) Nonspecific lipid-transfer protein (EC 2.3.1.176) (Propanoyl-CoA C-acyltransferase) (NSL-TP) (Sterol carrier protein 2) (SCP-2) (Sterol carrier protein X) (SCP-X) (SCP-chi) (SCPX) [MASS=58993] | *    | 2.38 | *    | *    | * | 1 | 2 | M[147]VGFDMSCAARK                       | 1  |
| NNTM_HUMAN (Q13423) NAD(P) transhydrogenase, mitochondrial precursor (EC 1.6.1.2) (Pyridine nucleotide transhydrogenase) (Nicotinamide nucleotide transhydrogenase) [MASS=113895]                                    | 1.00 | 5.43 | 1.21 | 0.02 | 3 | 4 | 2 | ILIVGGGVAGLASAGAAK                      | 1  |
|                                                                                                                                                                                                                      |      |      |      |      |   |   | 2 | KTC[339]DALQAK                          | 1  |
|                                                                                                                                                                                                                      |      |      |      |      |   |   | 2 | EANSIIITPGYGLC[339]AAK                  | 1  |
|                                                                                                                                                                                                                      |      |      |      |      |   |   | 3 | EFIEAEMKLFAQQC[339]K                    | 1  |
| NOP14_HUMAN (P78316) Probable nucleolar complex protein 14 [MASS=97668]                                                                                                                                              | *    | 3.97 | *    | *    | * | 2 | 3 | PDAYDMM[147]VRELGFMKAQPSNR              | 1  |
|                                                                                                                                                                                                                      |      |      |      |      |   |   | 2 | VLEFGRKQGSSK                            | 1  |
| NOP5_HUMAN (Q9Y2X3) Nucleolar protein NOP5 (Nucleolar protein 5) (NOP58) [MASS=59578]                                                                                                                                | 0.00 | 6.81 | 1.14 | 0.00 | 1 | 2 | 2 | EEPLSEEEPC[330]TSTAIASPEK               | 1  |
|                                                                                                                                                                                                                      |      |      |      |      |   |   | 3 | YGLIYHASLVGQTSPK                        | 1  |
|                                                                                                                                                                                                                      |      |      |      |      |   |   | 3 | SSPC[330]ANGGQC[339]QDQPGAFHC[330]K     | 1  |
|                                                                                                                                                                                                                      |      |      |      |      |   |   | 3 | C[339]SC[330]PHSSPGPR                   | 12 |
| NOTC4_HUMAN (Q99466) Neurogenic locus notch homolog protein 4 precursor (Notch 4) (hNotch4) [Contains: Notch 4 extracellular truncation; Notch 4 intracellular domain] [MASS=209621]                                 | *    | 1.55 | *    | *    | * | 2 |   |                                         |    |
| NOV_HUMAN (P48745) Protein NOV homolog precursor (NovH) (Nephroblastoma overexpressed gene protein homolog) [MASS=39162]                                                                                             | *    | 3.36 | *    | *    | * | 1 | 2 | FQPSC[330]KFQC[339]TC[339]R             | 1  |
| NOX3_HUMAN (Q9HBY0) NADPH oxidase 3 (EC 1.6.3.-) (gp91phox homolog 3) (GP91-3) (Mitogenic oxidase 2) [MASS=64934]                                                                                                    | 0.00 | 7.39 | 0.35 | 0.00 | 1 | 2 | 3 | TLQKM[147]C[330]HLYSSADPRGVHFYFNK       | 1  |
|                                                                                                                                                                                                                      |      |      |      |      |   |   | 2 | QIAYNHPSSSIGVFFC[330]GPK                | 1  |

|                                                                                                                                                                                                                                                    |      |       |      |      |   |   |   |                                                                                                           |                  |
|----------------------------------------------------------------------------------------------------------------------------------------------------------------------------------------------------------------------------------------------------|------|-------|------|------|---|---|---|-----------------------------------------------------------------------------------------------------------|------------------|
| NPC1_HUMAN (O15118) Niemann-Pick C1 protein precursor [MASS=142166]                                                                                                                                                                                | 0.00 | 3.13  | 0.58 | 0.00 | 1 | 2 | 2 | QRPQGGDFMRFLPMFLSDNPNPK<br>GAEDGTSVQASESC[330]LFR                                                         | 1<br>1           |
| NPHP1_HUMAN (O15259) Nephrocystin-1 (Juvenile nephronophthisis 1 protein) [MASS=83299]                                                                                                                                                             | 0.00 | 5.60  | 1.62 | 0.00 | 1 | 2 | 2 | M[147]IPLPGM[147]SIQVLSRHVR<br>NVLSELLPETLIGNM[147]C[339]SIHLLIFYR                                        | 1<br>1           |
| NPTN_HUMAN (Q9Y639) Neuroplastin precursor (Stromal cell-derived receptor 1) (SDR-1) [MASS=31291]                                                                                                                                                  | 1.00 | 11.70 | 0.52 | 0.09 | 3 | 2 | 2 | SENKNEGQDATM[147]YC[330]K<br>AEDSGEYHC[339]VYHFVSAPK<br>AEDSGEYHC[330]VYHFVSAPK                           | 1<br>1<br>1      |
| NRBP_HUMAN (Q9UHY1) Nuclear receptor-binding protein [MASS=59844]                                                                                                                                                                                  | *    | 4.30  | *    | *    | * | 1 | 3 | LQEEKVRAVFDNLIQLEHLNIVK                                                                                   | 1                |
| NRG2_HUMAN (O14511) Pro-neuregulin-2, membrane-bound isoform precursor (Pro-NRG2) [Contains: Neuregulin-2 (NRG-2) (Neural- and thymus-derived activator for ERBB kinases) (NTAK) (Divergent of neuregulin-1) (DON-1)] [MASS=91678]                 | *    | 9.06  | *    | *    | * | 3 | 3 | RDPAPGFSMLLFGVSLAC[339]YSPSLKSVQDQAYK<br>VALVKVLDKWPLR<br>AAAAGGM[147]RRDPAPGFSM[147]LLFGVSLAC[330]YSPSLK | 1<br>2<br>1      |
| NRX1A_HUMAN (Q9ULB1) Neurexin-1-alpha precursor (Neurexin I-alpha) [MASS=161882]                                                                                                                                                                   | *    | 2.17  | *    | *    | * | 2 | 2 | NYISNSAQSNQAVVK<br>FPKWNAC[330]C[330]ESEM[147]SFQLK                                                       | 1<br>1           |
| NRX3A_HUMAN (Q9Y4C0) Neurexin-3-alpha precursor (Neurexin III-alpha) [MASS=169922]                                                                                                                                                                 | *    | 2.40  | *    | *    | * | 2 | 2 | DSADTLRLELDGGRVK<br>QLAEMQNAAGVKSSC[339]SRM[147]SAK                                                       | 1<br>1           |
| NSF_HUMAN (P46459) Vesicle-fusing ATPase (EC 3.6.4.6) (Vesicular-fusion protein NSF) (N-ethylmaleimide sensitive fusion protein) (NEM-sensitive fusion protein) [MASS=82654]                                                                       | 0.97 | 4.30  | 0.37 | 0.00 | 1 | 2 | 2 | SQLSC[339]VVVDDIER<br>RQKIEVGLVVGNSQVAFEK                                                                 | 1<br>1           |
| NTAL_HUMAN (Q9GZY6) Linker for activation of T-cells family member 2 (Non-T-cell activation linker) (Linker for activation of B-cells) (Membrane-associated adapter molecule) (Williams-Beuren syndrome chromosome region 15 protein) [MASS=26550] | 0.00 | 27.98 | 2.85 | 0.00 | 1 | 2 | 3 | TGPTSGLC[339]PSASPEEDEESEDYQNSASIQWR<br>VMGQLQREASPGVGPDEEDGEPDYVNGEVAATEA                                | 1<br>1           |
| NU160_HUMAN (Q12769) Nuclear pore complex protein Nup160 (Nucleoporin Nup160) (160 kDa nucleoporin) [MASS=149000]                                                                                                                                  | 0.00 | 1.29  | 1.36 | 0.00 | 1 | 1 | 2 | EQMC[339]LM[147]VADM[147]LEYVPVK                                                                          | 1                |
| NU214_HUMAN (P35658) Nuclear pore complex protein Nup214 (Nucleoporin Nup214) (214 kDa nucleoporin) (CAN protein) [MASS=213765]                                                                                                                    | 0.00 | 2.92  | 3.42 | 0.00 | 1 | 4 | 2 | VC[339]ATLPSTVAVTSVC[339]WSPK<br>AC[339]FQVGTSEEMK<br>HGAPSPSHPIAPQQLAAAAALRR<br>RPFAYHK                  | 1<br>1<br>1<br>1 |



|                                                                                                                                                                                                   |                      |       |      |      |   |   |   |                                                 |   |
|---------------------------------------------------------------------------------------------------------------------------------------------------------------------------------------------------|----------------------|-------|------|------|---|---|---|-------------------------------------------------|---|
| NU3M_HUMAN (P03897) NADH-ubiquinone oxidoreductase chain 3 (EC 1.6.5.3) (NADH dehydrogenase subunit 3) [MASS=13186]                                                                               | 0.96                 | 13.04 | 0.80 | 0.00 | 1 | 1 | 2 | STPYEC[330]GFDPM[147]SPAR                       | 1 |
| NUAM_HUMAN (P28331) NADH-ubiquinone oxidoreductase 75 kDa subunit, mitochondrial precursor (EC 1.6.5.3) (EC 1.6.99.3) (Complex I-75Kd) (CI-75Kd) [MASS=79467]                                     | 1.00                 | 4.95  | 1.45 | 0.05 | 4 | 3 | 2 | VVAAC[339]AM[147]PVMK                           | 1 |
|                                                                                                                                                                                                   |                      |       |      |      |   |   | 3 | IRM[147]TSGVTGDWKVM[147]NILHR                   | 1 |
|                                                                                                                                                                                                   |                      |       |      |      |   |   | 2 | FC[339]YHER                                     | 1 |
|                                                                                                                                                                                                   |                      |       |      |      |   |   | 2 | VVAAC[339]AM[147]PVM[147]K                      | 1 |
|                                                                                                                                                                                                   |                      |       |      |      |   |   | 2 | FC[330]YHER                                     | 1 |
| NUBM_HUMAN (P49821) NADH-ubiquinone oxidoreductase 51 kDa subunit, mitochondrial precursor (EC 1.6.5.3) (EC 1.6.99.3) (Complex I-51KD) (CI-51KD) (NADH dehydrogenase flavoprotein 1) [MASS=50817] | 1.00                 | 18.32 | 1.77 | 0.09 | 5 | 6 | 2 | LLEGC[339]LVGGR                                 | 1 |
|                                                                                                                                                                                                   |                      |       |      |      |   |   | 2 | HESC[339]GQC[339]TPC[339]R                      | 1 |
|                                                                                                                                                                                                   |                      |       |      |      |   |   | 2 | NAC[339]GSGYDFDFVVR                             | 1 |
|                                                                                                                                                                                                   |                      |       |      |      |   |   | 2 | YLVVNADEGEGP[339]K                              | 1 |
|                                                                                                                                                                                                   |                      |       |      |      |   |   | 3 | FSGDTTAPKTSFGSLK                                | 1 |
| 2                                                                                                                                                                                                 | YLVVNADEGEGP[339]KDR | 1     |      |      |   |   |   |                                                 |   |
| NUHM_HUMAN (P19404) NADH-ubiquinone oxidoreductase 24 kDa subunit, mitochondrial precursor (EC 1.6.5.3) (EC 1.6.99.3) [MASS=27391]                                                                | 1.00                 | 5.62  | 1.78 | 0.04 | 3 | 1 | 2 | YHIQVC[339]TTTPC[339]M[147]LR                   | 2 |
|                                                                                                                                                                                                   |                      |       |      |      |   |   | 2 | YHIQVC[339]TTTPC[339]MLR                        | 1 |
| NUKM_HUMAN (O75251) NADH-ubiquinone oxidoreductase 20 kDa subunit, mitochondrial precursor (EC 1.6.5.3) (EC 1.6.99.3) (Complex I-20KD) (CI-20KD) (PSST subunit) [MASS=23563]                      | 0.94                 | 23.94 | 1.26 | 0.00 | 1 | 2 | 3 | SSLWPMTFGLAC[339]C[339]AVEMM[147]HMAAPR         | 1 |
|                                                                                                                                                                                                   |                      |       |      |      |   |   | 3 | IPVDIYIPGC[330]PPTAEALLYGILQLQR                 | 1 |
| NUMM_HUMAN (O75380) NADH-ubiquinone oxidoreductase 13 kDa-A subunit, mitochondrial precursor (EC 1.6.5.3) (EC 1.6.99.3) (Complex I-13KD-A) (CI-13KD-A) [MASS=13712]                               | 1.00                 | 21.77 | 1.39 | 0.15 | 6 | 2 | 3 | VIAC[339]DGGGGALGHPK                            | 2 |
|                                                                                                                                                                                                   |                      |       |      |      |   |   | 2 | VIAC[330]DGGGGALGHPK                            | 2 |
|                                                                                                                                                                                                   |                      |       |      |      |   |   | 2 | VIAC[339]DGGGGALGHPK                            | 1 |
|                                                                                                                                                                                                   |                      |       |      |      |   |   | 2 | TGTC[339]GYC[339]GLQFR                          | 1 |
| O51F1_HUMAN (Q8NH61) Olfactory receptor 51F2 [MASS=37205]                                                                                                                                         | 0.00                 | 9.70  | 0.87 | 0.00 | 1 | 1 | 3 | EINLNAC[330]IAQMFFLHGFTFM[147]ESGVLLAM[147]AFDR | 1 |
| O51Q1_HUMAN (Q8NH59) Olfactory receptor 51Q1 [MASS=35747]                                                                                                                                         | *                    | 6.31  | *    | *    | * | 1 | 3 | NKQIQWGM[147]LNFLSLKNM[147]HSR                  | 1 |
| O52P1_HUMAN (Q8NH57) Olfactory receptor 52P1 [MASS=34889]                                                                                                                                         | 0.00                 | 10.59 | 1.40 | 0.00 | 1 | 1 | 3 | YATILTDTIIAHIGVAAVVRGSLMLPC[339]PFLIGR          | 1 |
| OAT4_HUMAN (Q9NSA0) Solute carrier family 22 member 11 (Organic anion transporter 4) [MASS=59971]                                                                                                 | 0.00                 | 4.91  | 1.25 | 0.00 | 1 | 1 | 3 | RAVTMTVVC[330]AFSAGQAALGGLAFALR                 | 1 |
| OAT5_HUMAN (Q63ZE4) Solute carrier family 22 member 10 (Organic anion transporter 5) [MASS=59033]                                                                                                 | *                    | 4.71  | *    | *    | * | 2 | 3 | C[330]LALLTLNHMGR                               | 1 |
|                                                                                                                                                                                                   |                      |       |      |      |   |   | 3 | C[339]LALLTLNHMGR                               | 1 |

|                                                                                                                                                                                                                        |      |      |      |      |   |    |   |                                       |   |
|------------------------------------------------------------------------------------------------------------------------------------------------------------------------------------------------------------------------|------|------|------|------|---|----|---|---------------------------------------|---|
|                                                                                                                                                                                                                        |      |      |      |      |   |    | 2 | KPGLASFRLSGLK                         | 1 |
|                                                                                                                                                                                                                        |      |      |      |      |   |    | 2 | MDQPQFSGAPR                           | 1 |
|                                                                                                                                                                                                                        |      |      |      |      |   |    | 2 | GSETLRDGDR                            | 1 |
|                                                                                                                                                                                                                        |      |      |      |      |   |    | 2 | VEAVGC[330]TR                         | 1 |
|                                                                                                                                                                                                                        |      |      |      |      |   |    | 3 | PSAAQC[330]LSHPWFLKSMPAEEAHFINTK      | 1 |
|                                                                                                                                                                                                                        |      |      |      |      |   |    | 3 | KEM[147]KQQEGPM[147]FSHTFGDTEAQVGDALR | 1 |
|                                                                                                                                                                                                                        |      |      |      |      |   |    | 2 | FKM[147]SLEGQM[147]AELR               | 1 |
|                                                                                                                                                                                                                        |      |      |      |      |   |    | 2 | LM[147]LRRTC[339]STM[147]TGPVHFTVGK   | 1 |
|                                                                                                                                                                                                                        |      |      |      |      |   |    | 3 | C[339]YAGLSGGAVAFLRSTLC[339]AQPWGR    | 1 |
|                                                                                                                                                                                                                        |      |      |      |      |   |    | 3 | C[330]EFADQGVYVC[339]DAHDAQSSASVKVQGR | 1 |
|                                                                                                                                                                                                                        |      |      |      |      |   |    | 2 | PMPAHFIGRLRHQESIEGATATLR              | 1 |
|                                                                                                                                                                                                                        |      |      |      |      |   |    | 2 | MAPVEWWK                              | 1 |
|                                                                                                                                                                                                                        |      |      |      |      |   |    | 2 | LEVRVKPVVFLK                          | 1 |
|                                                                                                                                                                                                                        |      |      |      |      |   |    | 2 | GGYIAGALPGLR                          | 1 |
|                                                                                                                                                                                                                        |      |      |      |      |   |    | 3 | WLKDGVELTDGR                          | 1 |
|                                                                                                                                                                                                                        |      |      |      |      |   |    | 2 | SLTVLGLRAEDAGEYVC[339]ESR             | 1 |
|                                                                                                                                                                                                                        |      |      |      |      |   |    |   |                                       |   |
| OBSCN_HUMAN (Q5VST9) Obscurin<br>(Obscurin-myosin light chain kinase) (Obscurin-<br>MLCK) (Obscurin-RhoGEF) [MASS=868479]                                                                                              | 0.00 | 3.36 | 0.61 | 0.00 | 1 | 16 |   |                                       |   |
|                                                                                                                                                                                                                        |      |      |      |      |   |    | 3 | DIATETVGTGIMGKM[147]GNK               | 1 |
|                                                                                                                                                                                                                        |      |      |      |      |   |    | 2 | AIQFLLGFLLGSEED                       | 1 |
|                                                                                                                                                                                                                        |      |      |      |      |   |    |   |                                       |   |
| OCRL_HUMAN (Q01968) Inositol<br>polyphosphate 5-phosphatase OCRL-1 (EC<br>3.1.3.36) (Lowe oculocerebrorenal syndrome<br>protein) [MASS=104204]                                                                         | *    | 3.66 | *    | *    | * | 2  |   |                                       |   |
|                                                                                                                                                                                                                        |      |      |      |      |   |    | 2 | C[330]HSEPDGPGIAALTSEER               | 1 |
|                                                                                                                                                                                                                        |      |      |      |      |   |    | 3 | GFDRHLLGLLLIAK                        | 1 |
|                                                                                                                                                                                                                        |      |      |      |      |   |    |   |                                       |   |
| OCTC_HUMAN (Q9UKG9) Peroxisomal<br>carnitine O-octanoyltransferase (EC 2.3.1.137)<br>(COT) [MASS=70178]                                                                                                                | 0.00 | 5.23 | 0.87 | 0.00 | 1 | 2  |   |                                       |   |
|                                                                                                                                                                                                                        |      |      |      |      |   |    | 2 | C[339]TVGLR                           | 1 |
|                                                                                                                                                                                                                        |      |      |      |      |   |    |   |                                       |   |
| ODDB_HUMAN (P21953) 2-oxoisovalerate<br>dehydrogenase subunit beta, mitochondrial<br>precursor (EC 1.2.4.4) (Branched-chain alpha-<br>keto acid dehydrogenase E1 component beta<br>chain) (BCKDH E1-beta) [MASS=43122] | 0.00 | 1.53 | 1.44 | 0.00 | 1 | 1  |   |                                       |   |
|                                                                                                                                                                                                                        |      |      |      |      |   |    | 2 | NGHNEMDEPM[147]FTQPLM[147]YKQIR       | 1 |
|                                                                                                                                                                                                                        |      |      |      |      |   |    |   |                                       |   |
| ODO1_HUMAN (Q02218) 2-oxoglutarate<br>dehydrogenase E1 component, mitochondrial<br>precursor (EC 1.2.4.2) (Alpha-ketoglutarate<br>dehydrogenase) [MASS=113475]                                                         | *    | 2.10 | *    | *    | * | 1  |   |                                       |   |

|                                                                                                                                                                                                                                                                             |      |       |      |      |   |   |   |                                    |   |
|-----------------------------------------------------------------------------------------------------------------------------------------------------------------------------------------------------------------------------------------------------------------------------|------|-------|------|------|---|---|---|------------------------------------|---|
| ODP2_HUMAN (P10515) Dihydrolipoalysine-residue acetyltransferase component of pyruvate dehydrogenase complex, mitochondrial precursor (EC 2.3.1.12) (Pyruvate dehydrogenase complex E2 subunit) (PDCE2) (E2) (Dihydrolipoamide S-acetyltransferase component [MASS=65781])  | 0.62 | 4.89  | 0.99 | 0.00 | 1 | 2 | 1 | ASALAC[339]LK                      | 1 |
|                                                                                                                                                                                                                                                                             |      |       |      |      |   |   | 2 | DVPIGAIIC[339]ITVGKPEDIEAFK        | 1 |
| ODPA_HUMAN (P08559) Pyruvate dehydrogenase E1 component alpha subunit, somatic form, mitochondrial precursor (EC 1.2.4.1) (PDHE1-A type I) [MASS=43295]                                                                                                                     | 1.00 | 2.82  | 1.60 | 0.02 | 5 | 2 | 2 | KC[339]DLHR                        | 2 |
|                                                                                                                                                                                                                                                                             |      |       |      |      |   |   | 2 | C[339]DLHR                         | 2 |
|                                                                                                                                                                                                                                                                             |      |       |      |      |   |   | 1 | C[339]DLHR                         | 1 |
| ODPB_HUMAN (P11177) Pyruvate dehydrogenase E1 component subunit beta, mitochondrial precursor (EC 1.2.4.1) (PDHE1-B) [MASS=39219]                                                                                                                                           | 0.00 | 7.24  | 1.05 | 0.00 | 1 | 2 | 3 | QGTHITVVSHSR                       | 1 |
|                                                                                                                                                                                                                                                                             |      |       |      |      |   |   | 2 | PVGHC[339]LEAAAVLSK                | 1 |
| ODPX_HUMAN (O00330) Pyruvate dehydrogenase protein X component, mitochondrial precursor (Dihydrolipoamide dehydrogenase-binding protein of pyruvate dehydrogenase complex) (Lipoyl-containing pyruvate dehydrogenase complex component X) (E3-binding protein) [MASS=54122] | 0.99 | 8.18  | 1.78 | 0.00 | 1 | 2 | 2 | STVPHAYATADC[339]DLGAVLK           | 1 |
|                                                                                                                                                                                                                                                                             |      |       |      |      |   |   | 2 | GDIPIKILM[147]PSLSPTMEEGNIVK       | 1 |
| OMGP_HUMAN (P23515) Oligodendrocyte-myelin glycoprotein precursor [MASS=49608]                                                                                                                                                                                              | 0.93 | 10.45 | 1.00 | 0.00 | 1 | 2 | 2 | AHVIGTPC[330]STQISSLK              | 1 |
|                                                                                                                                                                                                                                                                             |      |       |      |      |   |   | 3 | FTFIPDQSFDFLQLQEITLYNNRWSC[330]DHK | 1 |
|                                                                                                                                                                                                                                                                             |      |       |      |      |   |   | 2 | TQEQC[339]VHNETKNELEK              | 1 |
| OPA1_HUMAN (O60313) Dynamin-like 120 kDa protein, mitochondrial precursor (Optic atrophy 1 gene protein) [MASS=111657]                                                                                                                                                      | 1.00 | 6.04  | 1.22 | 0.04 | 4 | 4 | 2 | TALNHC[339]NLC[339]R               | 1 |
|                                                                                                                                                                                                                                                                             |      |       |      |      |   |   | 3 | TQEQC[339]VHNETKNELEK              | 2 |
|                                                                                                                                                                                                                                                                             |      |       |      |      |   |   | 2 | LDAFIEALHQEK                       | 1 |
|                                                                                                                                                                                                                                                                             |      |       |      |      |   |   | 3 | EFDLTKEEDLAALRHEIELR               | 1 |
|                                                                                                                                                                                                                                                                             |      |       |      |      |   |   | 2 | TQEQC[330]VHNETKNELEK              | 1 |
| OPCM_HUMAN (Q14982) Opioid-binding protein/cell adhesion molecule precursor (OBCAM) (Opioid-binding cell adhesion molecule) (OPCML) [MASS=38007]                                                                                                                            | 0.98 | 13.62 | 1.48 | 0.00 | 1 | 2 | 2 | DQSGEYEC[339]SALNDVAAPDVRK         | 1 |
|                                                                                                                                                                                                                                                                             |      |       |      |      |   |   | 3 | GRMSTLTFNVSEKDYGNITC[339]VATNK     | 1 |

|                                                                                                                                                                                                                                                                             |      |       |      |      |   |   |                                 |                                                                                                                                                                                                                              |                                      |
|-----------------------------------------------------------------------------------------------------------------------------------------------------------------------------------------------------------------------------------------------------------------------------|------|-------|------|------|---|---|---------------------------------|------------------------------------------------------------------------------------------------------------------------------------------------------------------------------------------------------------------------------|--------------------------------------|
| OR2G3_HUMAN (Q8NGZ4) Olfactory receptor 2G3 (Olfactory receptor OR1-33) [MASS=34506]                                                                                                                                                                                        | 0.00 | 5.50  | 0.21 | 0.00 | 1 | 1 | 3                               | YIAVC[330]KPLHYVIM[147]NPR                                                                                                                                                                                                   | 1                                    |
| OR4N4_HUMAN (Q8N0Y3) Olfactory receptor 4N4 [MASS=35822]                                                                                                                                                                                                                    | 0.00 | 5.38  | 1.08 | 0.00 | 1 | 1 | 2                               | YIAIC[330]RPLHC[330]STVMNPR                                                                                                                                                                                                  | 1                                    |
| OR6A2_HUMAN (O95222) Olfactory receptor 6A2 (Olfactory receptor 11-55) (OR11-55) (hP2 olfactory receptor) [MASS=36154]                                                                                                                                                      | 0.00 | 5.20  | 0.82 | 0.00 | 1 | 1 | 3                               | YM[147]AIC[339]YPLHYPVIVSGR                                                                                                                                                                                                  | 1                                    |
| ORAV1_HUMAN (Q8WV07) Oral cancer overexpressed protein 1 (Tumor amplified and overexpressed sequence 1) [MASS=15354]                                                                                                                                                        | *    | 24.82 | *    | *    | * | 2 | 3<br>2                          | VLESLIGM[147]IQKFPYDDPTYDK<br>C[330]LLHSC[330]TTEKDSR                                                                                                                                                                        | 1<br>1                               |
| ORCT2_HUMAN (Q96B11) Organic cation transporter-like protein 2 (Imprinted multi-membrane spanning polyspecific transporter-related protein 1) (Efflux transporter-like protein) (Tumor-suppressing subchromosomal transferable fragment candidate gene 5 prote [MASS=43123] | 0.00 | 7.35  | 0.80 | 0.00 | 1 | 1 | 3                               | SSVILLTYVLAATELTC[330]LFMQFSIVPYLSR                                                                                                                                                                                          | 1                                    |
| ORNT1_HUMAN (Q9Y619) Mitochondrial ornithine transporter 1 (Solute carrier family 25 member 15) [MASS=32736]                                                                                                                                                                | *    | 4.65  | *    | *    | * | 1 | 2                               | C[339]RLQTM[147]YEMETSGK                                                                                                                                                                                                     | 1                                    |
| OSBP1_HUMAN (P22059) Oxysterol-binding protein 1 [MASS=89420]                                                                                                                                                                                                               | *    | 7.81  | *    | *    | * | 3 | 2<br>3<br>3<br>3<br>2<br>3<br>1 | EKQDWSSC[330]PDIF<br>M[147]AATELRGVVGPAAIAALGGGGAGPPVGGGGGR<br>VQPVIGENGGDARQR<br>WFEVDLPENELLHPPLNIR<br>QLVGLNM[147]DPVVC[330]VEVGDDK<br>ANETDEDDIEGNLLLPEGVPPER<br>LVPEHVETR<br>M[147]ADEAYC[339]PPRFPPQLEYQIYR<br>RHTVRDK | 1<br>1<br>1<br>1<br>1<br>1<br>1<br>2 |
| OTOF_HUMAN (Q9HC10) Otoferlin (Fer-1-like protein 2) [MASS=226735]                                                                                                                                                                                                          | 0.00 | 6.06  | 0.93 | 0.00 | 1 | 8 | 3<br>1<br><br>2<br>2            | M[147]ADEAYC[339]PPRFPPQLEYQIYR<br>RHTVRDK<br><br>DGKVDGPHFGPPGR<br>YFLWHTYR                                                                                                                                                 | 1<br>2<br><br>1<br>1                 |
| OVOL2_HUMAN (Q9BRP0) Transcription factor Ovo-like 2 (hOvo2) (Zinc finger protein 339) [MASS=30438]                                                                                                                                                                         | 0.00 | 3.64  | 2.55 | 0.00 | 1 | 1 | 3                               | LLHDPPEDC[339]R                                                                                                                                                                                                              | 1                                    |

|                                                                                                                                                                                                                                                                             |      |       |      |      |   |   |                                                                                                                    |                                      |   |
|-----------------------------------------------------------------------------------------------------------------------------------------------------------------------------------------------------------------------------------------------------------------------------|------|-------|------|------|---|---|--------------------------------------------------------------------------------------------------------------------|--------------------------------------|---|
| P2RY5_HUMAN (P43657) P2Y purinoceptor 5 (P2Y5) (Purinergic receptor 5) (RB intron encoded G-protein coupled receptor) [MASS=39391]                                                                                                                                          | 0.00 | 7.56  | 0.61 | 0.00 | 1 | 1 | 3                                                                                                                  | IVIFIEIVGFFIPLILNVTC[330]SSM[147]VLK | 1 |
| PA2G6_HUMAN (O60733) 85 kDa calcium-independent phospholipase A2 (EC 3.1.1.4) (iPLA2) (CaI-PLA2) (Group VI phospholipase A2) (GVI PLA2) [MASS=89902]                                                                                                                        | *    | 3.23  | *    | *    | * | 1 | 2                                                                                                                  | MLLKRGCG[330]NVNSTSSAGNTALHVAVMR     | 1 |
| PACN1_HUMAN (Q9BY11) Protein kinase C and casein kinase substrate in neurons protein 1 [MASS=50965]                                                                                                                                                                         | 1.00 | 12.39 | 0.49 | 0.15 | 2 | 4 | 2 LAM[147]TREM[147]NSKTEQSVTPEQQK<br>3 LC[330]NDLM[147]NC[339]VQERAKIEK<br>2 AYHLAC[330]KEEK<br>2 AYHLAC[330]K     | 1<br>1<br>1<br>1                     |   |
| PADI3_HUMAN (Q9ULW8) Protein-arginine deiminase type-3 (EC 3.5.3.15) (Protein-arginine deiminase type III) (Peptidylarginine deiminase III) [MASS=74743]                                                                                                                    | 0.00 | 1.66  | 0.47 | 0.00 | 1 | 1 | 2                                                                                                                  | MLLASPGAC[330]FK                     | 1 |
| PANK3_HUMAN (Q9H999) Pantothenate kinase 3 (EC 2.7.1.33) (Pantothenic acid kinase 3) (hPanK3) [MASS=41094]                                                                                                                                                                  | 0.00 | 14.05 | 1.02 | 0.00 | 1 | 2 | 3 EDLARATLVITINNIGSVARMCG[339]AVNEK<br>3 ATLVITINNIGSVARMCG[339]AVNEKINR                                           | 1<br>1                               |   |
| PANK4_HUMAN (Q9NVE7) Pantothenate kinase 4 (EC 2.7.1.33) (Pantothenic acid kinase 4) (hPanK4) [MASS=85990]                                                                                                                                                                  | 0.00 | 2.46  | 3.11 | 0.01 | 2 | 1 | 3                                                                                                                  | SLLHMISNDIGQLAC[339]LHAR             | 2 |
| PAPS1_HUMAN (O43252) Bifunctional 3'-phosphoadenosine 5'-phosphosulfate synthetase 1 (PAPS synthetase 1) (PAPSS 1) (Sulfurylase kinase 1) (SK1) (SK 1) [Includes: Sulfate adenylyltransferase (EC 2.7.7.4) (Sulfate adenylyl transferase) (SAT) (ATP-sulfuryl) [MASS=70833] | *    | 4.81  | *    | *    | * | 3 | 2 DPAGMPHPETGK<br>1 M[147]EIPGSLC[330]K<br>2 NLGFSPEDR                                                             | 1<br>1<br>1                          |   |
| PARK7_HUMAN (Q99497) Protein DJ-1 (Oncogene DJ1) [MASS=19891]                                                                                                                                                                                                               | 1.00 | 26.98 | 0.66 | 0.19 | 3 | 3 | 2 MM[147]NGGHYTYSENK<br>3 GLIAAIC[330]AGPTALLAHEIGFGSK<br>2 GLIAAIC[330]AGPTALLAHEIGFGSK<br>2 DVVIC[330]PDASLEDAKK | 1<br>1<br>1<br>1                     |   |
| PARP2_HUMAN (Q9UGN5) Poly [ADP-ribose] polymerase 2 (EC 2.4.2.30) (PARP-2) (NAD(+) ADP-ribosyltransferase 2) (Poly[ADP-ribose] synthetase 2) (pADPRT-2) (hPARP-2) [MASS=66205]                                                                                              | 0.00 | 6.17  | 0.52 | 0.00 | 1 | 2 | 2 M[147]GQHSLVAC[330]SGNLNKAK<br>3 YDMLQM[147]DYATNTQDEEETK                                                        | 1<br>1                               |   |

|                                                                                                                                                                                      |      |      |      |      |   |   |   |                                        |   |
|--------------------------------------------------------------------------------------------------------------------------------------------------------------------------------------|------|------|------|------|---|---|---|----------------------------------------|---|
| PAX3_HUMAN (P23760) Paired box protein Pax-3 (HUP2) [MASS=52967]                                                                                                                     | 0.00 | 3.13 | *    | *    | * | 1 | 2 | QLRVSHGC[330]VSKILC[339]R              | 1 |
|                                                                                                                                                                                      |      |      |      |      |   |   | 2 | QLRVSHGC[339]VSKILC[339]R              | 1 |
| PAX7_HUMAN                                                                                                                                                                           | 0.00 | 4.62 | 3.01 | 0.00 | 1 | 1 | 3 | ASC[339]LFMESYKVVSGWGM[147]SISQMEK     | 1 |
| PAX8_HUMAN (Q06710) Paired box protein Pax-8 [MASS=48118]                                                                                                                            | 0.00 | 4.00 | 0.99 | 0.00 | 1 | 1 | 2 | QRIVDLAHQGVRPC[339]DISR                | 1 |
|                                                                                                                                                                                      |      |      |      |      |   |   | 3 | AYC[339]RKDYFDMFAPK                    | 1 |
| PAXI_HUMAN (P49023) Paxillin [MASS=64533]                                                                                                                                            | 0.00 | 5.75 | 2.37 | 0.00 | 1 | 3 | 3 | C[339]WAAGWPRDGGR                      | 1 |
|                                                                                                                                                                                      |      |      |      |      |   |   | 2 | AGPLTKEK                               | 1 |
| PCCB_HUMAN (P05166) Propionyl-CoA carboxylase beta chain, mitochondrial precursor (EC 6.4.1.3) (PCCase subunit beta) (Propanoyl-CoA:carbon dioxide ligase subunit beta) [MASS=58205] | *    | 2.97 | *    | *    | * | 1 | 2 | VASGC[330]LDINSSVKGAR                  | 1 |
| PCD18_HUMAN (Q9HCL0) Protocadherin-18 precursor [MASS=125307]                                                                                                                        | 0.00 | 0.44 | 1.35 | 0.00 | 1 | 1 | 2 | SYNC[339]R                             | 1 |
| PCD19_HUMAN (Q8TAB3) Protocadherin-19 precursor [MASS=126252]                                                                                                                        | 0.00 | 0.96 | 5.31 | 0.00 | 1 | 1 | 2 | EEC[339]RILGHSDR                       | 1 |
| PCDA1_HUMAN (Q9Y513) Protocadherin alpha 1 precursor (PCDH-alpha1) [MASS=102951]                                                                                                     | 0.00 | 2.21 | 0.54 | 0.00 | 1 | 1 | 2 | SYEIQVKAVDKGSPPMNSHC[339]K             | 1 |
| PCDLK_HUMAN (Q9BYE9) Protocadherin LKC precursor (PC-LKC) [MASS=141574]                                                                                                              | *    | 1.07 | *    | *    | * | 1 | 2 | DM[147]GSAGMVVYSIEK                    | 1 |
|                                                                                                                                                                                      |      |      |      |      |   |   | 3 | RSDIRGSNGPTINATTC[330]FETTSVM[147]GEIK | 1 |
|                                                                                                                                                                                      |      |      |      |      |   |   | 3 | GSHVHSGPTSAGSSSVSPGQPGSPSVSKKK         | 1 |
|                                                                                                                                                                                      |      |      |      |      |   |   | 3 | GQYDDMGENMTDDPRSFKK                    | 1 |
|                                                                                                                                                                                      |      |      |      |      |   |   | 1 | TKALQTYK                               | 1 |
| PCLO_HUMAN (Q9Y6V0) Protein piccolo (Aczonin) [MASS=566653]                                                                                                                          | 0.00 | 3.49 | *    | *    | * | 9 | 2 | LKTAPVTTTSAVSK                         | 1 |
|                                                                                                                                                                                      |      |      |      |      |   |   | 2 | PPSQQPGSTKPPPQQPGPAKPSPPQPGSTK         | 1 |
|                                                                                                                                                                                      |      |      |      |      |   |   | 3 | ERAYLQGVAEDRDYMSDSEVSSTR               | 1 |
|                                                                                                                                                                                      |      |      |      |      |   |   | 3 | TLIGEAC[330]IWLDKVDLRK                 | 1 |
|                                                                                                                                                                                      |      |      |      |      |   |   | 1 | AIPRPASDSK                             | 2 |
|                                                                                                                                                                                      |      |      |      |      |   |   | 2 | KTALHEK                                | 1 |
| PCNT_HUMAN (O95613) Pericentrin (Pericentrin B) (Kendrin) [MASS=378079]                                                                                                              | 0.00 | 1.62 | 0.89 | 0.00 | 1 | 4 | 3 | VAELQTKHAADLGALETR                     | 1 |
|                                                                                                                                                                                      |      |      |      |      |   |   | 2 | TQEAC[330]VHQDTQAHHALLQK               | 1 |
|                                                                                                                                                                                      |      |      |      |      |   |   | 2 | C[339]LEDLEFKFK                        | 1 |

|                                                                                                                                                                                                                                                                              |      |       |      |      |   |   |   |                                            |   |
|------------------------------------------------------------------------------------------------------------------------------------------------------------------------------------------------------------------------------------------------------------------------------|------|-------|------|------|---|---|---|--------------------------------------------|---|
| PCSK6_HUMAN (P29122) Proprotein convertase subtilisin/kexin type 6 precursor (EC 3.4.21.-) (Paired basic amino acid cleaving enzyme 4) (Subtilisin/kexin-like protease PACE4) (Subtilisin-like proprotein convertase 4) (SPC4) [MASS=106420]                                 | 0.00 | 6.19  | 1.47 | 0.00 | 1 | 3 | 2 | PPPRAAAATDTAAGAGGAGGAGGAGGPGFR             | 1 |
|                                                                                                                                                                                                                                                                              |      |       |      |      |   |   | 2 | NC[339]LKC[330]HPSC[330]KK                 | 1 |
|                                                                                                                                                                                                                                                                              |      |       |      |      |   |   | 2 | GSC[339]IPDC[339]EPGTYFDSELIR              | 1 |
| PCYOX_HUMAN (Q9UHG3) Prenylcysteine oxidase precursor (EC 1.8.3.5) (PCL1) [MASS=56611]                                                                                                                                                                                       | 0.00 | 3.96  | 0.88 | 0.00 | 1 | 2 | 2 | C[339]PSIILHDR                             | 1 |
|                                                                                                                                                                                                                                                                              |      |       |      |      |   |   | 3 | FLNEMIAPVMR                                | 1 |
| PDCD8_HUMAN (O95831) Programmed cell death protein 8, mitochondrial precursor (EC 1.-.-.) (Apoptosis-inducing factor) [MASS=66900]                                                                                                                                           | *    | 3.10  | *    | *    | * | 1 | 2 | LPGNLFQRWHVPLELQM[147]TR                   | 1 |
| PDIA3_HUMAN (P30101) Protein disulfide-isomerase A3 precursor (EC 5.3.4.1) (Disulfide isomerase ER-60) (ERp60) (58 kDa microsomal protein) (p58) (ERp57) (58 kDa glucose-regulated protein) [MASS=56782]                                                                     | *    | 5.94  | *    | *    | * | 1 | 3 | TFSHELSDFGLESTAGEIPVVAIRTAKGEK             | 1 |
| PDZK3_HUMAN (O15018) PDZ domain-containing protein 3 (PDZ domain-containing protein 2) (Activated in prostate cancer protein) [MASS=301609]                                                                                                                                  | *    | 2.64  | *    | *    | * | 3 | 3 | MESNLSRGDQILEVNSVNR                        | 1 |
|                                                                                                                                                                                                                                                                              |      |       |      |      |   |   | 3 | AM[147]PGTDEPQDVC[339]GAEESKGNLESPK        | 1 |
|                                                                                                                                                                                                                                                                              |      |       |      |      |   |   | 3 | LQELRALSMPLDKLC[339]SEDYSAGPSAVLFK         | 1 |
| PDZK6_HUMAN (Q9ULD6) PDZ domain-containing protein 6 [MASS=105647]                                                                                                                                                                                                           | 0.00 | 2.44  | *    | *    | * | 1 | 2 | TGKQGDGERLVVHGLLPGGSAM[147]K               | 1 |
| PEA15_HUMAN (Q15121) Astrocytic phosphoprotein PEA-15 (Phosphoprotein enriched in diabetes) (PED) [MASS=15040]                                                                                                                                                               | 0.32 | 8.46  | 1.60 | 0.00 | 1 | 1 | 2 | SAC[339]KEDIPSEK                           | 1 |
| PECI_HUMAN (O75521) Peroxisomal 3,2-trans-enoyl-CoA isomerase (EC 5.3.3.8) (Dodecenoyl-CoA isomerase) (Delta(3),delta(2)-enoyl-CoA isomerase) (D3,D2-enoyl-CoA isomerase) (DBI-related protein 1) (DRS-1) (Hepatocellular carcinoma-associated antigen 88) (NY [MASS=39609]) | *    | 8.08  | *    | *    | * | 1 | 3 | PLIAVVNGPAVGISVTLGLFDVAYASDR               | 1 |
| PEX19_HUMAN (P40855) Peroxisomal biogenesis factor 19 (Peroxin-19) (Peroxisomal farnesylated protein) (33 kDa housekeeping protein) [MASS=32806]                                                                                                                             | *    | 11.04 | *    | *    | * | 1 | 3 | M[147]AAAEEGC[339]SVGAEADRELELLESALDDFDKAK | 1 |

|                                                                                                                                                                                                                                                                              |      |       |      |      |   |   |   |                                          |   |
|------------------------------------------------------------------------------------------------------------------------------------------------------------------------------------------------------------------------------------------------------------------------------|------|-------|------|------|---|---|---|------------------------------------------|---|
| PF4V_HUMAN (P10720) Platelet factor 4 variant precursor (PF4var1) (PF4alt) (CXCL4L1) [Contains: Platelet factor 4 variant(4-74); Platelet factor 4 variant(5-74); Platelet factor 4 variant(6-74)] [MASS=11553]                                                              | 0.00 | 14.42 | *    | *    | * | 1 | 2 | AEAEEDGDLQC[330]LC[330]VK                | 1 |
| PGBM_HUMAN (P98160) Basement membrane-specific heparan sulfate proteoglycan core protein precursor (HSPG) (Perlecan) (PLC) [MASS=468822]                                                                                                                                     | 0.00 | 1.82  | 0.70 | 0.00 | 1 | 4 | 3 | GQTVTFTC[330]VAIGVPTPIINWR               | 1 |
|                                                                                                                                                                                                                                                                              |      |       |      |      |   |   | 2 | AVTLEC[330]VSAGEPR                       | 1 |
|                                                                                                                                                                                                                                                                              |      |       |      |      |   |   | 2 | C[330]APGYGNPSQGQPC[330]QR               | 1 |
|                                                                                                                                                                                                                                                                              |      |       |      |      |   |   | 2 | ATFSSVPLVASISAVSLEVAQPGPSNRPR            | 1 |
| PGCB_HUMAN (Q96GW7) Brevican core protein precursor (Brain-enriched hyaluronan-binding protein) (Protein BEHAB) [MASS=99117]                                                                                                                                                 | *    | 1.76  | *    | *    | * | 1 | 3 | HFSTRRSWEEAETQC[339]R                    | 1 |
| PGK1_HUMAN (P00558) Phosphoglycerate kinase 1 (EC 2.7.2.3) (Primer recognition protein 2) (PRP 2) [MASS=44483]                                                                                                                                                               | 1.00 | 19.47 | 1.08 | 0.29 | 2 | 4 | 2 | VLNNM[147]EIGTSLFDEEGAK                  | 1 |
|                                                                                                                                                                                                                                                                              |      |       |      |      |   |   | 2 | AC[339]ANPAAGSVILLENLR                   | 1 |
|                                                                                                                                                                                                                                                                              |      |       |      |      |   |   | 3 | FDENAKTGQATVASGIPAGWM[147]GLDC[339]GPESK | 1 |
|                                                                                                                                                                                                                                                                              |      |       |      |      |   |   | 2 | DVLFKDC[330]VGPEVEK                      | 1 |
| PGM2L_HUMAN (Q6PCE3) Phosphoglucomutase-2-like 1 (EC 5.4.2.2) (PMMLP) [MASS=70455]                                                                                                                                                                                           | 0.88 | 3.70  | 0.53 | 0.28 | 2 | 1 | 3 | YYAEMC[330]ASPDQSDTALLEELKK              | 2 |
| PGTB_HUMAN (P53611) Geranylgeranyl transferase type-2 subunit beta (EC 2.5.1.60) (Geranylgeranyl transferase type II subunit beta) (Rab geranylgeranyltransferase subunit beta) (Rab geranyl-geranyltransferase subunit beta) (Rab GG transferase beta) (Rab G) [MASS=36924] | *    | 13.29 | *    | *    | * | 2 | 3 | PGDMVDPFHFTLFGIAGLSLLGEEQIK              | 1 |
|                                                                                                                                                                                                                                                                              |      |       |      |      |   |   | 3 | AIEFVLSG[339]M[147]NFDGGFGC[339]R        | 1 |
|                                                                                                                                                                                                                                                                              |      |       |      |      |   |   |   |                                          |   |
| PHAR3_HUMAN (Q96KR7) Phosphatase and actin regulator 3 (Scapinin) (Scaffold-associated PP1-inhibiting protein) [MASS=62552]                                                                                                                                                  | 0.00 | 1.61  | 0.52 | 0.00 | 1 | 1 | 2 | TC[339]NPDGGPR                           | 1 |
| PHLD1_HUMAN (P80108) Phosphatidylinositol-glycan-specific phospholipase D 1 precursor (EC 3.1.4.50) (PI-G PLD) (Glycoprotein phospholipase D) (Glycosyl-phosphatidylinositol-specific phospholipase D) [MASS=92374]                                                          | *    | 2.98  | *    | *    | * | 1 | 3 | C[339]KSWITPC[330]PEEKAQYVLISPEASSR      | 1 |



|                                                                                                                                                                                                                                                                              |   |      |      |      |      |   |             |                                                                        |             |
|------------------------------------------------------------------------------------------------------------------------------------------------------------------------------------------------------------------------------------------------------------------------------|---|------|------|------|------|---|-------------|------------------------------------------------------------------------|-------------|
| PHLPP_HUMAN (O60346) PH domain leucine-rich repeat-containing protein phosphatase (EC 3.1.3.16) (PH domain leucine-rich repeat protein phosphatase) (Pleckstrin homology domain-containing family E protein 1) (Suprachiasmatic nucleus circadian oscillatory [MASS=184671]) | * | 3.26 | *    | *    | *    | 2 | 3<br>2      | ISSVDLSC[330]C[339]SLEHLPANLFYSQDLTHLNLK<br>ASPAPSDSSSPGEPFVGGPVSPPRPR | 1<br>1      |
| PHLP_HUMAN (Q13371) Phosducin-like protein (PHLP) [MASS=34281]                                                                                                                                                                                                               |   | 0.00 | 8.64 | 0.88 | 0.00 | 1 | 1           | 2 C[330]APASSSVPAEAEELAGEGISVNTGPK                                     | 1           |
| PI3R4_HUMAN (Q99570) Phosphoinositide 3-kinase regulatory subunit 4 (EC 2.7.11.1) (PI3-kinase regulatory subunit 4) (PI3-kinase p150 subunit) (Phosphoinositide 3-kinase adaptor protein) [MASS=152971]                                                                      | * | 1.84 | *    | *    | *    | 2 | 3<br>2      | LNSAQNC[330]LPFQKASEK<br>ELVTQM[147]IHR                                | 1<br>1      |
| PI52B_HUMAN (P78356) Phosphatidylinositol-4-phosphate 5-kinase type-2 beta (EC 2.7.1.68) (Phosphatidylinositol-4-phosphate 5-kinase type II beta) (1-phosphatidylinositol-4-phosphate 5-kinase 2-beta) (PtdIns(4)P-5-kinase isoform 2-beta) (PIP5KII-beta) (Di [MASS=47378]) |   | 0.00 | 2.88 | *    | *    | * | 1           | 2 FKFKEYC[330]PMVFR                                                    | 1           |
| PIGT_HUMAN (Q969N2) GPI transamidase component PIG-T precursor (Phosphatidylinositol-glycan biosynthesis, class T protein) [MASS=65699]                                                                                                                                      |   | 0.00 | 4.50 | 1.12 | 0.00 | 1 | 2<br>2      | LFHTSYHSQAVHIRPVC[339]R<br>RLANLIRR                                    | 1<br>1      |
| PITM2_HUMAN (Q9BZ72) Membrane-associated phosphatidylinositol transfer protein 2 (Phosphatidylinositol transfer protein, membrane-associated 2) (Pyk2 N-terminal domain-interacting receptor 3) (NIR-3) [MASS=148932]                                                        |   | 0.00 | 3.34 | 0.47 | 0.00 | 1 | 3<br>3<br>2 | KQVFPIMC[330]AYK<br>NQLTIDFIDIVKDPVPHNEYK<br>APDALSHTPSVRR             | 1<br>1<br>1 |
| PK3CG_HUMAN (P48736) Phosphatidylinositol-4,5-bisphosphate 3-kinase catalytic subunit gamma isoform (EC 2.7.1.153) (PI3-kinase p110 subunit gamma) (PtdIns-3-kinase subunit p110) (PI3K) (PI3Kgamma) (p120-PI3K) [MASS=126453]                                               | * | 1.81 | *    | *    | *    | 1 | 2           | GQWYEIYDKYQVQTLDC[339]LR                                               | 1           |

|                                                                                                                                                                                                                                                     |                              |       |       |      |   |    |   |                                              |   |
|-----------------------------------------------------------------------------------------------------------------------------------------------------------------------------------------------------------------------------------------------------|------------------------------|-------|-------|------|---|----|---|----------------------------------------------|---|
| PKDRE_HUMAN (Q9NTG1) Polycystic kidney disease and receptor for egg jelly-related protein precursor (PKD and REJ homolog) [MASS=255447]                                                                                                             | *                            | 1.29  | *     | *    | * | 1  | 3 | VM[147]LQAVNSSSHRAVESSVSC[330]QINAC[339]VIQR | 1 |
| PKHA5_HUMAN (Q9HAU0) Pleckstrin homology domain-containing family A member 5 (Phosphoinositol 3-phosphate-binding protein 2) (PEPP-2) [MASS=127463]                                                                                                 | *                            | 9.95  | *     | *    | * | 6  | 3 | AQIMARYPEGYRTLPR                             | 1 |
|                                                                                                                                                                                                                                                     |                              |       |       |      |   |    | 2 | TNSMQQLEQWIK                                 | 1 |
|                                                                                                                                                                                                                                                     |                              |       |       |      |   |    | 3 | KTENISYEM[147]LFEPEPNGVNSVEMMDK              | 1 |
|                                                                                                                                                                                                                                                     |                              |       |       |      |   |    | 3 | TENISYEM[147]LFEPEPNGVNSVEM[147]M[147]DKERNK | 1 |
|                                                                                                                                                                                                                                                     |                              |       |       |      |   |    | 2 | TYYFC[330]TDTGKEM[147]ELWM[147]K             | 1 |
|                                                                                                                                                                                                                                                     |                              |       |       |      |   |    | 2 | YAFKAAHPNMR                                  | 1 |
| PKHD1_HUMAN (Q8TCZ9) Polycystic kidney and hepatic disease 1 precursor (Fibrocystin) (Polyductin) (Tigmin) [MASS=446699]                                                                                                                            | 0.00                         | 2.87  | 0.71  | 0.00 | 1 | 6  | 3 | VNQVKDINLHGNVVGASER                          | 1 |
|                                                                                                                                                                                                                                                     |                              |       |       |      |   |    | 2 | TPKRWELM[147]VSNTTFVNFDLINC[339]VAIR         | 1 |
|                                                                                                                                                                                                                                                     |                              |       |       |      |   |    | 3 | NGTSLHGSLEPEVIVTC[330]LR                     | 1 |
|                                                                                                                                                                                                                                                     |                              |       |       |      |   |    | 2 | DSC[330]TFKFSK                               | 1 |
|                                                                                                                                                                                                                                                     |                              |       |       |      |   |    | 2 | MKVMLGKVNQC[339]PHQLMNGVSR                   | 1 |
| 3                                                                                                                                                                                                                                                   | RWELMVSNTTFVNFDLINC[339]VAIR | 1     |       |      |   |    |   |                                              |   |
| PKP1_HUMAN (Q13835) Plakophilin-1 (Band-6 protein) (B6P) [MASS=82860]                                                                                                                                                                               | 0.00                         | 1.47  | 11.83 | 0.00 | 1 | 1  | 2 | C[339]PVRPPSC[339]ASK                        | 1 |
| PLCB2_HUMAN (Q00722) 1-phosphatidylinositol-4,5-bisphosphate phosphodiesterase beta 2 (EC 3.1.4.11) (Phosphoinositide phospholipase C) (Phospholipase C-beta-2) (PLC-beta-2) [MASS=133679]                                                          | *                            | 1.35  | *     | *    | * | 1  | 2 | REINNSHIQEVVQVIK                             | 1 |
| PLCB_HUMAN (O15120) 1-acyl-sn-glycerol-3-phosphate acyltransferase beta (EC 2.3.1.51) (1-AGP acyltransferase 2) (1-AGPAT 2) (Lysophosphatidic acid acyltransferase-beta) (LPAAT-beta) (1-acylglycerol-3-phosphate O-acyltransferase 2) [MASS=30914] | 0.00                         | 24.46 | 0.43  | 0.00 | 1 | 3  | 2 | MELWPC[330]LAAALLLLLLLVLQSLR                 | 1 |
|                                                                                                                                                                                                                                                     |                              |       |       |      |   |    | 3 | QRSSTAM[147]TVMADLGER                        | 1 |
|                                                                                                                                                                                                                                                     |                              |       |       |      |   |    | 3 | RLQEARPC[339]VIVSNHQSILDM[147]GLM[147]EVLPER | 1 |
| PLEC1_HUMAN (Q15149) Plectin-1 (PLTN) (PCN) (Hemidesmosomal protein 1) (HD1) [MASS=531733]                                                                                                                                                          | 0.00                         | 3.63  | 0.68  | 0.00 | 1 | 10 | 3 | C[330]VEDPETGLC[330]LLPLTDKAAKGGELVYTDSEAR   | 1 |
|                                                                                                                                                                                                                                                     |                              |       |       |      |   |    | 2 | WQLKANEALR                                   | 1 |
|                                                                                                                                                                                                                                                     |                              |       |       |      |   |    | 2 | LLAAGKVPQR                                   | 1 |
|                                                                                                                                                                                                                                                     |                              |       |       |      |   |    | 3 | ERMIIIIIEIEK                                 | 1 |
|                                                                                                                                                                                                                                                     |                              |       |       |      |   |    | 3 | PGTAFELLEQAATGYVIDPIKGLKLTVEEAVR             | 1 |
|                                                                                                                                                                                                                                                     |                              |       |       |      |   |    | 2 | LRAETEQQEQQR                                 | 1 |
|                                                                                                                                                                                                                                                     |                              |       |       |      |   |    | 2 | INLAQKAF[330]GFEDPR                          | 1 |
|                                                                                                                                                                                                                                                     |                              |       |       |      |   |    | 2 | HGERDVEVER                                   | 1 |
| 2                                                                                                                                                                                                                                                   | LISLFQAM[147]KKGLILK         | 1     |       |      |   |    |   |                                              |   |
| 2                                                                                                                                                                                                                                                   | PDQLTGLSLLPLSEKAARAR         | 1     |       |      |   |    |   |                                              |   |

|                                                                                                                                                                                                   |      |       |      |      |   |   |   |                                            |   |
|---------------------------------------------------------------------------------------------------------------------------------------------------------------------------------------------------|------|-------|------|------|---|---|---|--------------------------------------------|---|
| PLMN_HUMAN (P00747) Plasminogen precursor (EC 3.4.21.7) [Contains: Plasmin heavy chain A; Activation peptide; Angiostatin; Plasmin heavy chain A, short form; Plasmin light chain B] [MASS=90569] | 0.00 | 5.56  | 0.86 | 0.00 | 1 | 2 | 2 | AFQYHSKEQQC[330]VIM[147]AENR               | 1 |
|                                                                                                                                                                                                   |      |       |      |      |   |   | 3 | ISKTM[147]SGLEEC[339]QAWDSQSPHAHGYIPSK     | 1 |
| PLOD3_HUMAN (O60568) Procollagen-lysine,2-oxoglutarate 5-dioxygenase 3 precursor (EC 1.14.11.4) (Lysyl hydroxylase 3) (LH3) [MASS=84785]                                                          | 0.00 | 3.79  | 0.23 | 0.00 | 1 | 1 | 3 | LQLNYLGNYPNGWTPPEGGC[330]GFC[330]NQDRR     | 1 |
| PLP2_HUMAN (Q04941) Proteolipid protein 2 (Intestinal membrane A4 protein) (Differentiation-dependent protein A4) (Proteolipid protein 2) [MASS=16691]                                            | 0.00 | 16.45 | 0.70 | 0.00 | 1 | 1 | 3 | IVAGVLGLIATC[330]LFGYDAYVTFPVR             | 1 |
| PLSB_HUMAN (Q9HCL2) Glycerol-3-phosphate acyltransferase, mitochondrial precursor (EC 2.3.1.15) (GPAT) [MASS=93794]                                                                               | 0.00 | 2.90  | *    | *    | * | 1 | 3 | RILQEM[147]VATVSPAM[147]IRLTGWVLLK         | 1 |
| PLXA1_HUMAN (Q9UIW2) Plexin-A1 precursor (Semaphorin receptor NOV) [MASS=211086]                                                                                                                  | 0.00 | 1.79  | 0.74 | 0.00 | 1 | 2 | 3 | IRKILVDLSNPGGR                             | 2 |
|                                                                                                                                                                                                   |      |       |      |      |   |   | 2 | C[330]LTPPGQSPGSAPIIININR                  | 1 |
|                                                                                                                                                                                                   |      |       |      |      |   |   | 2 | TLVLSC[330]VSPDNANSPEVPVK                  | 1 |
| PLXA4_HUMAN (Q9HCM2) Plexin-A4 precursor [MASS=212454]                                                                                                                                            | 0.00 | 5.07  | 0.90 | 0.00 | 1 | 4 | 2 | AMPWNWTC[330]LLSHLLM[147]VGM[147]GSSTLLTR  | 1 |
|                                                                                                                                                                                                   |      |       |      |      |   |   | 3 | GEPAEGFNHLVVDERTGHIYLGAVNRIYK              | 1 |
|                                                                                                                                                                                                   |      |       |      |      |   |   | 3 | MHM[147]NEFNTMSALSEIFSIVGK                 | 1 |
| PLXB3_HUMAN (Q9ULL4) Plexin-B3 precursor [MASS=206846]                                                                                                                                            | *    | 2.72  | *    | *    | * | 2 | 3 | GLAGKLSAGVPPLAIRQLAGSQPFSEGLGR             | 1 |
|                                                                                                                                                                                                   |      |       |      |      |   |   | 3 | C[339]HWC[339]PQSSHHC[339]VYGEHC[330]PEGER | 1 |
|                                                                                                                                                                                                   |      |       |      |      |   |   | 3 | AAAASPPPFQTPPRC[339]PVPLLLLLLLGAAR         | 1 |
| PLXD1_HUMAN (Q9Y4D7) Plexin-D1 precursor [MASS=212094]                                                                                                                                            | 0.00 | 4.47  | 0.97 | 0.00 | 1 | 4 | 2 | ELLVDLIDASAAKNPKLM[147]LR                  | 1 |
|                                                                                                                                                                                                   |      |       |      |      |   |   | 2 | PQIMAALANPTARRTQLQHK                       | 1 |
|                                                                                                                                                                                                   |      |       |      |      |   |   | 3 | YQNEFNTNVAM[147]AEIYK                      | 1 |
| PMS2_HUMAN (P54278) PMS1 protein homolog 2 (DNA mismatch repair protein PMS2) [MASS=95797]                                                                                                        | *    | 2.55  | *    | *    | * | 2 | 3 | PSRVKQM[147]FASR                           | 1 |
|                                                                                                                                                                                                   |      |       |      |      |   |   | 2 | LVNEVYHMYNR                                | 1 |
| PO4F1_HUMAN (Q01851) POU domain, class 4, transcription factor 1 (Brain-specific homeobox/POU domain protein 3A) (Brn-3A) (Oct-T1) (Homeobox/POU domain protein RDC-1) [MASS=42939]               | 0.00 | 6.15  | 1.71 | 0.00 | 1 | 2 | 2 | M[147]NKPELFNGGEK                          | 1 |
|                                                                                                                                                                                                   |      |       |      |      |   |   | 2 | IPGVGSLSQSTIC[339]R                        | 1 |

|                                                                                                                                                                                                                                             |      |       |      |      |   |   |                                                                                                                              |                         |   |
|---------------------------------------------------------------------------------------------------------------------------------------------------------------------------------------------------------------------------------------------|------|-------|------|------|---|---|------------------------------------------------------------------------------------------------------------------------------|-------------------------|---|
| PO5F1_HUMAN (Q01860) POU domain, class 5, transcription factor 1 (Octamer-binding transcription factor 3) (Oct-3) (Oct-4) [MASS=38570]                                                                                                      | 0.32 | 5.00  | 8.03 | 0.00 | 1 | 1 | 2                                                                                                                            | VFSQTTIC[339]RFEALQLSFK | 1 |
| POK10_HUMAN (P10266) HERV-K_5q33.3 provirus ancestral Pol protein (HERV-K10 Pol protein) (HERV-K107 Pol protein) [Includes: Reverse transcriptase (RT) (EC 2.7.7.49); Ribonuclease H (EC 3.1.26.4) (RNase H); Integrase (IN)] [MASS=114826] | 0.00 | 2.76  | 0.91 | 0.00 | 1 | 2 | 2 KHLISC[339]FAVM[147]GVPEK<br>3 ERVIKTPYQSAQR                                                                               | 1<br>1                  |   |
| POPD1_HUMAN (Q8NE79) Blood vessel epicardial substance (hBVES) (Popeye domain-containing protein 1) (Popeye protein 1) [MASS=41451]                                                                                                         | *    | 3.61  | *    | *    | * | 1 | 3 PVKIEKELSGM[147]YR                                                                                                         | 1                       |   |
| PP1A_HUMAN (P62136) Serine/threonine-protein phosphatase PP1-alpha catalytic subunit (EC 3.1.3.16) (PP-1A) [MASS=37512]                                                                                                                     | 0.96 | 3.03  | 1.19 | 0.00 | 1 | 1 | 2 GNHEC[339]ASINR                                                                                                            | 1                       |   |
| PP1B_HUMAN                                                                                                                                                                                                                                  | 0.96 | 7.67  | *    | *    | * | 1 | 3 FNIKLWKFTDC[339]FNC[330]LPAAIVDEK                                                                                          | 1                       |   |
| PP2AA_HUMAN (P67775) Serine/threonine-protein phosphatase 2A catalytic subunit alpha isoform (EC 3.1.3.16) (PP2A-alpha) (Replication protein C) (RP-C) [MASS=35594]                                                                         | 1.00 | 12.94 | 0.59 | 0.28 | 2 | 2 | 3 IGGKSPDTNYLFM[147]GDYVDR<br>2 C[330]PVTVC[330]GDVHGQFHDLMELFR<br>3 C[330]PVTVC[330]GDVHGQFHDLMELFR                         | 1<br>1<br>1             |   |
| PP2BA_HUMAN (Q08209) Serine/threonine-protein phosphatase 2B catalytic subunit alpha isoform (EC 3.1.3.16) (Calmodulin-dependent calcineurin A subunit alpha isoform) (CAM-PRP catalytic subunit) [MASS=58687]                              | *    | 5.76  | *    | *    | * | 2 | 3 GLTPTGM[147]LPSGVLSGGK<br>3 VDILKAHLM[147]KEGR                                                                             | 1<br>1                  |   |
| PPARB_HUMAN (Q03181) Peroxisome proliferator-activated receptor delta (PPAR-delta) (PPAR-beta) (Nuclear hormone receptor 1) (NUC1) (NUCI) [MASS=49903]                                                                                      | *    | 14.74 | *    | *    | * | 3 | 3 SSSPPSLLDQLQMGCC[339]DGASC[339]GSLNM[147]EC[339]R<br>3 M[147]EQPQEEAPEVREEEK<br>3 C[339]QYC[330]RFQKC[330]LALGM[147]SHNAIR | 1<br>1<br>1             |   |
| PPB1_HUMAN (P05187) Alkaline phosphatase, placental type precursor (EC 3.1.3.1) (PLAP-1) (Regan isozyme) [MASS=57953]                                                                                                                       | 0.00 | 8.04  | 0.27 | 0.00 | 1 | 2 | 3 QEGC[330]QDIATQLISNMDIDVILGGGR<br>2 DGARPDVTESESGSPEYR                                                                     | 1<br>1                  |   |
| PPBN_HUMAN                                                                                                                                                                                                                                  | 0.00 | 4.89  | *    | *    | * | 1 | 3 YMFPMGTPDPEYPPDYSQGGTRLGDK                                                                                                 | 1                       |   |

|                                                                                                                                                                                                                                           |      |       |      |      |   |   |             |                                                                                                    |             |
|-------------------------------------------------------------------------------------------------------------------------------------------------------------------------------------------------------------------------------------------|------|-------|------|------|---|---|-------------|----------------------------------------------------------------------------------------------------|-------------|
| PPCKC_HUMAN (P35558)<br>Phosphoenolpyruvate carboxykinase, cytosolic [GTP] (EC 4.1.1.32) (Phosphoenolpyruvate carboxylase) (PEPCK-C) [MASS=69194]                                                                                         | 0.00 | 4.66  | 0.90 | 0.00 | 1 | 1 | 3           | EVEDIEKYLEQVNDLPC[330]EIEREILALK                                                                   | 1           |
| PPCT_HUMAN (Q9UKL6) Phosphatidylcholine transfer protein (PC-TP) (StAR-related lipid transfer protein 2) (StARD2) (START domain-containing protein 2) [MASS=24843]                                                                        | 0.00 | 11.21 | 0.73 | 0.00 | 1 | 1 | 2           | VFGVLEDC[330]SPTLLADIYMDSYRK                                                                       | 1           |
| PPIA_HUMAN (P62937) Peptidyl-prolyl cis-trans isomerase A (EC 5.2.1.8) (PPIase A) (Rotamase A) (Cyclophilin A) (Cyclosporin A-binding protein) [MASS=17881]                                                                               | *    | 16.46 | *    | *    | * | 1 | 3           | HTGPGILSM[147]ANAGPNTNGSQFFIC[339]TAK                                                              | 1           |
| PPID_HUMAN (Q08752) 40 kDa peptidyl-prolyl cis-trans isomerase (EC 5.2.1.8) (PPIase) (Rotamase) (Cyclophilin-40) (CYP-40) (Cyclophilin-related protein) [MASS=40632]                                                                      | 0.00 | 9.21  | 1.12 | 0.00 | 1 | 2 | 2<br>2      | IVLELFADIVPKTAENFRALC[339]TGEK<br>GC[330]PFHRIIK                                                   | 1<br>1      |
| PPIH_HUMAN (O43447) Peptidyl-prolyl cis-trans isomerase H (EC 5.2.1.8) (PPIase H) (Rotamase H) (U-snRNP-associated cyclophilin SnuCyp-20) (USA-CYP) (Small nuclear ribonucleoprotein particle-specific cyclophilin H) (CypH) [MASS=19208] | 0.00 | 38.98 | 0.78 | 0.00 | 1 | 3 | 2<br>3<br>2 | HVVFVKIIDGLLVM[147]RK<br>LRHSAPGLLSMANS GPSTNGC[339]QFFITC[330]SK<br>IENVPTGPNNKPKLPVVISQC[330]GEM | 1<br>1<br>1 |
| PIIP1_HUMAN (O43586) Proline-serine-threonine phosphatase-interacting protein 1 (PEST phosphatase-interacting protein 1) (CD2-binding protein 1) (H-PIP) [MASS=47591]                                                                     | 0.00 | 4.81  | 0.86 | 0.00 | 1 | 1 | 2           | EVTPLTSSPGIQPSC[339]GMIKR                                                                          | 1           |
| PPT1_HUMAN (P50897) Palmitoyl-protein thioesterase 1 precursor (EC 3.1.2.22) (Palmitoyl-protein hydrolase 1) [MASS=34193]                                                                                                                 | 0.99 | 4.25  | 0.49 | 0.00 | 1 | 1 | 2           | C[339]PGESSHIC[339]DFIR                                                                            | 1           |
| PRA10_HUMAN (O60809) PRAME family member 10 (Fragment) [MASS=53385]                                                                                                                                                                       | 0.00 | 6.10  | 1.14 | 0.00 | 1 | 2 | 3<br>2      | ISNIKEHLEHLLR<br>DM[147]EC[330]LSQYPSLSQLK                                                         | 1<br>1      |
| PRA12_HUMAN (O95522) PRAME family member DJ1198H6.2 [MASS=54663]                                                                                                                                                                          | 0.00 | 4.76  | 0.67 | 0.00 | 1 | 1 | 3           | TAGNC[330]PRPGGQQPLM[147]VILDLC[330]FK                                                             | 1           |
| PRAM4_HUMAN (O60810) PRAME family member 4 [MASS=55466]                                                                                                                                                                                   | *    | 5.86  | *    | *    | * | 1 | 3           | DQALAM[147]STLEELPTLFPPLFM[147]EAFSRR                                                              | 1           |

|                                                                                                                                                                                                                                                                    |      |       |      |      |   |   |   |                                          |   |
|--------------------------------------------------------------------------------------------------------------------------------------------------------------------------------------------------------------------------------------------------------------------|------|-------|------|------|---|---|---|------------------------------------------|---|
| PRC1_HUMAN (O43663) Protein regulator of cytokinesis 1 [MASS=71664]                                                                                                                                                                                                | 0.47 | 6.29  | 0.89 | 0.08 | 2 | 2 | 2 | LPPSGSKPVAASTC[330]SGKK                  | 1 |
|                                                                                                                                                                                                                                                                    |      |       |      |      |   |   | 3 | RSEVLAEESIVC[339]LQKALNHLR               | 2 |
| PRD13_HUMAN (Q9H4Q3) PR domain zinc finger protein 13 (PR domain-containing protein 13) [MASS=75059]                                                                                                                                                               | *    | 3.21  | *    | *    | * | 1 | 2 | PAGLARAAAAAHGDPYREESSK                   | 1 |
| PRD15_HUMAN (P57071) PR domain zinc finger protein 15 (PR domain-containing protein 15) (Zinc finger protein 298) [MASS=169203]                                                                                                                                    | *    | 2.06  | *    | *    | * | 2 | 2 | HKLIHTGVKSHAC[330]EQC[339]GK             | 1 |
|                                                                                                                                                                                                                                                                    |      |       |      |      |   |   | 2 | EYLVKHM[147]EVHKEK                       | 1 |
| PRDM1_HUMAN (O75626) PR domain zinc finger protein 1 (PR domain-containing protein 1) (Beta-interferon gene positive-regulatory domain I-binding factor) (BLIMP-1) (Positive regulatory domain I-binding factor 1) (PRDI-binding factor 1) (PRDI-BF1) [MASS=87991] | 0.00 | 6.84  | 1.28 | 0.00 | 1 | 2 | 2 | LLQPEHPREVLVPAPHSAFSFTGAAASM[147]KDK     | 1 |
|                                                                                                                                                                                                                                                                    |      |       |      |      |   |   | 3 | NM[147]GNLLSSGC[330]SLYESSDLPLM[147]K    | 1 |
| PRDX3_HUMAN (P30048) Thioredoxin-dependent peroxide reductase, mitochondrial precursor (EC 1.11.1.15) (Peroxiredoxin-3) (PRX III) (Antioxidant protein 1) (AOP-1) (Protein MER5 homolog) (HBC189) [MASS=27692]                                                     | 0.99 | 17.97 | 1.64 | 0.00 | 1 | 2 | 2 | YLVVFFYPLDFTFVC[339]PTEIVAFSDK           | 1 |
|                                                                                                                                                                                                                                                                    |      |       |      |      |   |   | 2 | NGGLGHMNIALLSDLTKQISR                    | 1 |
| PRI2_HUMAN (P49643) DNA primase large subunit (EC 2.7.7.-) (DNA primase 58 kDa subunit) (p58) [MASS=58806]                                                                                                                                                         | 0.00 | 10.61 | 1.12 | 0.00 | 1 | 2 | 2 | ISLDQIDLLSTKSFPPC[330]M[147]R            | 1 |
|                                                                                                                                                                                                                                                                    |      |       |      |      |   |   | 3 | PSVQKTKDASSALASLNSSLEM[147]DMEGLEDYFSEDS | 1 |
| PRND_HUMAN (Q9UKY0) Prion-like protein doppel precursor (PrPLP) (Prion protein 2) [MASS=20293]                                                                                                                                                                     | 0.25 | 9.66  | 0.64 | 0.00 | 1 | 1 | 3 | LHQVWLWRLVQELC[339]SLK                   | 1 |
| PRP31_HUMAN (Q8WWY3) U4/U6 small nuclear ribonucleoprotein Prp31 (Pre-mRNA-processing factor 31) (U4/U6 snRNP 61 kDa protein) (hPrp31) (Protein 61K) (Serologically defined breast cancer antigen NY-BR-99) [MASS=55456]                                           | *    | 7.62  | *    | *    | * | 2 | 3 | YSKRFPELESVLPNALDYIR                     | 1 |
|                                                                                                                                                                                                                                                                    |      |       |      |      |   |   | 2 | M[147]FAEIM[147]M[147]KIEEYISKQAK        | 1 |
| PRP4B_HUMAN (Q13523) Serine/threonine-protein kinase PRP4 homolog (EC 2.7.11.1) (PRP4 pre-mRNA-processing factor 4 homolog) (PRP4 kinase) [MASS=116972]                                                                                                            | *    | 3.48  | *    | *    | * | 2 | 3 | YKYLAEDSNMSVPSEPSSPQSSTRTR               | 1 |
|                                                                                                                                                                                                                                                                    |      |       |      |      |   |   | 2 | IQRQAIVQK                                | 1 |

|                                                                                                                                                                                                                                                                        |      |       |      |      |   |   |   |                                    |   |
|------------------------------------------------------------------------------------------------------------------------------------------------------------------------------------------------------------------------------------------------------------------------|------|-------|------|------|---|---|---|------------------------------------|---|
| PSB5_HUMAN (P28074) Proteasome subunit beta type 5 precursor (EC 3.4.25.1) (Proteasome epsilon chain) (Macropain epsilon chain) (Multicatalytic endopeptidase complex epsilon chain) (Proteasome subunit X) (Proteasome chain 6) (Proteasome subunit MB1) [MASS=22897] | 0.00 | 11.54 | 2.13 | 0.00 | 1 | 1 | 3 | VEINPYLLGTMAGGAADC[339]SFWER       | 1 |
| PSD12_HUMAN (O00232) 26S proteasome non-ATPase regulatory subunit 12 (26S proteasome regulatory subunit p55) [MASS=52773]                                                                                                                                              | *    | 6.15  | *    | *    | * | 1 | 3 | MAQLLDLSVDESEAFSLNLVVKTIK          | 1 |
| PTC1_HUMAN (Q13635) Protein patched homolog 1 (PTC1) (PTC) [MASS=160560]                                                                                                                                                                                               | *    | 0.76  | *    | *    | * | 1 | 2 | DGLDLTDIVPR                        | 1 |
| PTN14_HUMAN (Q15678) Tyrosine-protein phosphatase non-receptor type 14 (EC 3.1.3.48) (Protein-tyrosine phosphatase pez) [MASS=135238]                                                                                                                                  | 0.00 | 5.14  | 0.58 | 0.00 | 1 | 4 | 2 | DNHGNC[339]VHLGIFFMGIFVR           | 1 |
|                                                                                                                                                                                                                                                                        |      |       |      |      |   |   | 2 | HGPAKAISMSR                        | 1 |
|                                                                                                                                                                                                                                                                        |      |       |      |      |   |   | 1 | M[147]PFGLKLR                      | 1 |
|                                                                                                                                                                                                                                                                        |      |       |      |      |   |   | 2 | ERPVSSEMFSLDSIIEREMM[147]IR        | 1 |
| PTN6_HUMAN (P29350) Tyrosine-protein phosphatase non-receptor type 6 (EC 3.1.3.48) (Protein-tyrosine phosphatase 1C) (PTP-1C) (Hematopoietic cell protein-tyrosine phosphatase) (SH-PTP1) (Protein-tyrosine phosphatase SHP-1) [MASS=67561]                            | 0.00 | 6.39  | 0.93 | 0.00 | 1 | 2 | 2 | AYGPYSVTNC[339]GEHDTTEYK           | 1 |
|                                                                                                                                                                                                                                                                        |      |       |      |      |   |   | 3 | ESLSQPGDFVLSVLSQPK                 | 1 |
|                                                                                                                                                                                                                                                                        |      |       |      |      |   |   |   |                                    |   |
| PTPR2_HUMAN (Q92932) Receptor-type tyrosine-protein phosphatase N2 precursor (EC 3.1.3.48) (R-PTP-N2) (Islet cell autoantigen-related protein) (ICAAR) (IAR) (Phogrin) [MASS=111281]                                                                                   | 0.00 | 3.25  | 0.43 | 0.00 | 1 | 2 | 2 | LSGLGGDPGADATAAAYQELC[330]R        | 2 |
|                                                                                                                                                                                                                                                                        |      |       |      |      |   |   | 2 | YEVSPVALQRLR                       | 1 |
| PTPRK_HUMAN (Q15262) Receptor-type tyrosine-protein phosphatase kappa precursor (EC 3.1.3.48) (Protein-tyrosine phosphatase kappa) (R-PTP-kappa) [MASS=162087]                                                                                                         | *    | 1.95  | *    | *    | * | 2 | 1 | DAMGNTR                            | 1 |
|                                                                                                                                                                                                                                                                        |      |       |      |      |   |   | 3 | VLLTRPGEGETGLPGPLITR               | 1 |
| PTPRM_HUMAN (P28827) Receptor-type tyrosine-protein phosphatase mu precursor (EC 3.1.3.48) (Protein-tyrosine phosphatase mu) (R-PTP-mu) [MASS=163632]                                                                                                                  | 0.00 | 5.23  | 0.20 | 0.00 | 1 | 3 | 3 | PTSDPWMPGSLMLVNASGRPEGQR           | 1 |
|                                                                                                                                                                                                                                                                        |      |       |      |      |   |   | 3 | YRC[330]MIRTEGGVGISNYAELVVK        | 1 |
|                                                                                                                                                                                                                                                                        |      |       |      |      |   |   | 3 | ENDTHC[330]IDFHVFVSSKSNPPGLLNIVYVK | 1 |

|                                                                                                                                                                                                                |      |      |      |      |   |   |   |                                       |   |
|----------------------------------------------------------------------------------------------------------------------------------------------------------------------------------------------------------------|------|------|------|------|---|---|---|---------------------------------------|---|
| PTPRT_HUMAN (O14522) Receptor-type tyrosine-protein phosphatase T precursor (EC 3.1.3.48) (R-PTP-T) (RPTP-rho) [MASS=164371]                                                                                   | *    | 4.99 | *    | *    | * | 3 | 2 | LLVLDGDPHSDYINANYIDGYHRPR             | 1 |
|                                                                                                                                                                                                                |      |      |      |      |   |   | 3 | PMLDQAVPTGSFMMVNSSGRASGQKAHLLPLTK     | 1 |
|                                                                                                                                                                                                                |      |      |      |      |   |   | 2 | ASTAKGFPPVTR                          | 1 |
| PTPRZ_HUMAN (P23471) Receptor-type tyrosine-protein phosphatase zeta precursor (EC 3.1.3.48) (R-PTP-zeta) [MASS=254528]                                                                                        | *    | 1.21 | *    | *    | * | 1 | 3 | VTSVSSDSQTGMDRSPGKSPSANGLSQK          | 1 |
| PUR4_HUMAN (O15067) Phosphoribosylformylglycinamide synthase (EC 6.3.5.3) (FGAM synthase) (FGAMS) (Formylglycinamide ribotide amidotransferase) (FGARAT) (Formylglycinamide ribotide synthetase) [MASS=144663] | *    | 4.63 | *    | *    | * | 3 | 2 | LNFSTPTSTNIVSVC[330]RATGLGPVDR        | 1 |
|                                                                                                                                                                                                                |      |      |      |      |   |   | 1 | EC[339]PVR                            | 1 |
|                                                                                                                                                                                                                |      |      |      |      |   |   | 3 | VGTTTVRAPGSLVISAYAVC[339]PDITATVTPDLK | 1 |
| PURA_HUMAN (Q00577) Transcriptional activator protein Pur-alpha (Purine-rich single-stranded DNA-binding protein alpha) [MASS=34911]                                                                           | 0.87 | 2.17 | 1.52 | 0.00 | 2 | 1 | 2 | FGHTFC[339]K                          | 1 |
|                                                                                                                                                                                                                |      |      |      |      |   |   | 2 | FGHTFC[330]K                          | 1 |
| PYGB_HUMAN (P11216) Glycogen phosphorylase, brain form (EC 2.4.1.1) [MASS=96564]                                                                                                                               | 0.00 | 4.16 | *    | *    | * | 2 | 3 | INMAHLC[330]VIGSHAVNGVAR              | 1 |
|                                                                                                                                                                                                                |      |      |      |      |   |   | 2 | TC[330]AYTNHTVLPEALER                 | 1 |
| PYGM_HUMAN (P11217) Glycogen phosphorylase, muscle form (EC 2.4.1.1) (Myophosphorylase) [MASS=96960]                                                                                                           | 0.00 | 3.69 | 0.62 | 0.00 | 1 | 2 | 3 | VIPAADLSEQISTAGTEASGTGNM[147]K        | 1 |
|                                                                                                                                                                                                                |      |      |      |      |   |   | 1 | VEDVDK                                | 1 |
| PYR1_HUMAN (P27708) CAD protein [Includes: Glutamine-dependent carbamoyl-phosphate synthase (EC 6.3.5.5); Aspartate carbamoyltransferase (EC 2.1.3.2); Dihydroorotase (EC 3.5.2.3)] [MASS=242982]              | 0.00 | 2.61 | 1.08 | 0.00 | 1 | 3 | 2 | IFVVAALWAGYSVDRLYELTR                 | 1 |
|                                                                                                                                                                                                                |      |      |      |      |   |   | 3 | C[339]DFALFLGASSENAGTLGTVAGSAAGLK     | 1 |
|                                                                                                                                                                                                                |      |      |      |      |   |   | 2 | IDRWFLHR                              | 1 |
| PZRN4_HUMAN (Q6ZMN7) PDZ domain-containing RING finger protein 4 (Ligand of Numb-protein X 4) (SEMACAP3-like protein) [MASS=117072]                                                                            | 0.00 | 4.54 | 0.34 | 0.00 | 1 | 2 | 2 | GGC[330]ASGLGGGEVPAR                  | 1 |
|                                                                                                                                                                                                                |      |      |      |      |   |   | 3 | NEFLEELNLEM[147]LEEEHNEAMQPTANEVEQPKK | 1 |
| R4RL2_HUMAN (Q86UN3) Reticulon-4 receptor-like 2 precursor (Nogo-66 receptor homolog 1) (Nogo-66 receptor-related protein 2) (NgR2) (Nogo receptor-like 3) [MASS=46105]                                        | 0.00 | 2.86 | 1.16 | 0.00 | 1 | 1 | 2 | C[330]QLSSLPGNIFR                     | 1 |



|                                                                                                                                                                                   |      |       |      |      |   |   |             |                                                                                     |             |
|-----------------------------------------------------------------------------------------------------------------------------------------------------------------------------------|------|-------|------|------|---|---|-------------|-------------------------------------------------------------------------------------|-------------|
| RAB38_HUMAN (P57729) Ras-related protein Rab-38 (Antigen NY-MEL-1) [MASS=23712]                                                                                                   | *    | 9.48  | *    | *    | * | 1 | 3           | C[339]DQGKDVLM[147]NNGLKMDQFC[330]K                                                 | 1           |
| RABE2_HUMAN (Q9H5N1) Rab GTPase-binding effector protein 2 (Rabaptin-5beta) [MASS=63542]                                                                                          | *    | 6.15  | *    | *    | * | 2 | 2<br>2      | PGAALEDSRSQEGANGEAESGELSR<br>LQAQEHGAER                                             | 1<br>1      |
| RAC1_HUMAN (P63000) Ras-related C3 botulinum toxin substrate 1 precursor (p21-Rac1) (Ras-like protein TC25) [MASS=21450]                                                          | 0.70 | 5.21  | 0.72 | 0.00 | 1 | 1 | 2           | AVLC[330]PPPVKK                                                                     | 1           |
| RAG1_HUMAN (P15918) V(D)J recombination-activating protein 1 (RAG-1) (RING finger protein 74) [MASS=119115]                                                                       | 0.00 | 3.74  | 1.18 | 0.00 | 1 | 2 | 3<br>3      | VC[330]ILRC[330]LKVMSYSC[330]PSC[330]R<br>C[339]YEMEDVLKHHWLYTSKYLQK                | 1<br>1      |
| RAI14_HUMAN (Q9P0K7) Ankyrin repeat and coiled-coil structure-containing protein (Retinoic acid-induced protein 14) (Novel retinal pigment epithelial cell protein) [MASS=110041] | 0.80 | 3.67  | 1.95 | 0.00 | 1 | 2 | 3<br>3      | QLLEEKAAMTDAM[147]VPR<br>TALMLAC[330]EIGSSNAVEALIK                                  | 1<br>1      |
| RAI1_HUMAN (Q7Z5J4) Retinoic acid-induced protein 1 [MASS=203351]                                                                                                                 | 0.00 | 3.15  | 0.95 | 0.00 | 1 | 3 | 3<br>3<br>2 | GPEC[330]AAAATAGKPPR<br>KLSSTDC[339]FKTEAFTSPEALQPGGTALAPK<br>VRPEGTC[330]EEASLPLER | 1<br>1<br>1 |
| RAP2C_HUMAN (Q9Y3L5) Ras-related protein Rap-2c precursor [MASS=20745]                                                                                                            | 0.00 | 25.14 | 0.82 | 0.00 | 1 | 2 | 2<br>3      | VDLEPEREVM[147]SSEGR<br>VDLEPEREVMSEGRALAQEWGC[339]PFMETSAC                         | 1<br>1      |
| RASF4_HUMAN (Q9H2L5) Ras association domain-containing protein 4 [MASS=36748]                                                                                                     | *    | 5.30  | *    | *    | * | 1 | 3           | DC[339]EYPLISRILHGPC[330]JEK                                                        | 1           |
| RBBP8_HUMAN (Q99708) Retinoblastoma-binding protein 8 (RBBP-8) (CtBP-interacting protein) (CtIP) (Retinoblastoma-interacting protein and myosin-like) (RIM) [MASS=101967]         | 0.00 | 6.24  | 1.52 | 0.00 | 1 | 3 | 2<br>2<br>3 | KMNSLEDMFDR<br>ETSLQNFPHIEVVRK<br>ENAFPPMDNQFSM[147]NGDC[339]VM[147]DKPLDLSDR       | 1<br>1<br>1 |
| RBM4B_HUMAN (Q9BQ04) RNA-binding protein 4B (RNA-binding motif protein 4B) (RNA-binding protein 30) (RNA-binding motif protein 30) [MASS=40149]                                   | *    | 5.01  | *    | *    | * | 1 | 3           | NYGFVHIEDKTAEDAIR                                                                   | 1           |
| RBP17_HUMAN (Q9H2T7) Ran-binding protein 17 [MASS=124375]                                                                                                                         | 0.00 | 4.41  | 1.81 | 0.00 | 1 | 2 | 3<br>3      | LIANFTITSLQHWEFAPNSVHYLLTLWQR<br>IEAEKALLELIDSPEC[339]LSK                           | 1<br>1      |

|                                                                                                                                                                                                                                 |      |      |      |      |   |   |   |                                          |   |
|---------------------------------------------------------------------------------------------------------------------------------------------------------------------------------------------------------------------------------|------|------|------|------|---|---|---|------------------------------------------|---|
| RBP2_HUMAN (P49792) Ran-binding protein 2 (RanBP2) (Nuclear pore complex protein Nup358) (Nucleoporin Nup358) (358 kDa nucleoporin) (P270) [MASS=358197]                                                                        | *    | 1.46 | *    | *    | * | 2 | 3 | C[339]IAC[339]QNPQKQNTTSAVSTPASSETSK     | 1 |
|                                                                                                                                                                                                                                 |      |      |      |      |   |   | 2 | DVQESRELLQSFDSALQSVK                     | 1 |
| RBPSL_HUMAN (Q9UBG7) Recombining binding protein suppressor of hairless-like protein (Transcription factor RBP-L) [MASS=56594]                                                                                                  | *    | 3.10 | *    | *    | * | 1 | 2 | QC[339]ALLDVDEPISQLHK                    | 1 |
| RBY1A_HUMAN (Q15414) RNA-binding motif protein, Y chromosome, family 1 member A1 (RNA-binding motif protein 1) [MASS=55783]                                                                                                     | 0.00 | 9.88 | 0.54 | 0.00 | 1 | 3 | 3 | MSYGGSTC[330]HAYSNTR                     | 1 |
|                                                                                                                                                                                                                                 |      |      |      |      |   |   | 3 | SWESYSSC[339]GDFHYC[330]DREHVC[330]R     | 1 |
|                                                                                                                                                                                                                                 |      |      |      |      |   |   | 2 | MSYGGSTC[339]HAYSNTR                     | 1 |
|                                                                                                                                                                                                                                 |      |      |      |      |   |   | 2 | RGPSSRSGGPPPK                            | 1 |
| RCBT2_HUMAN (O95199) RCC1 and BTB domain-containing protein 2 (Regulator of chromosome condensation and BTB domain-containing protein 2) (Chromosome condensation 1-like) (CHC1-L) (RCC1-like G exchanging factor) [MASS=60315] | 0.00 | 3.99 | 0.92 | 0.00 | 1 | 1 | 3 | M[147]LDVGKWPISLFC[330]SEEELQLIR         | 1 |
| RCC2_HUMAN (Q9P258) Protein RCC2 (Telophase disk protein of 60 kDa) (RCC1-like protein TD-60) [MASS=56084]                                                                                                                      | 0.00 | 4.98 | 1.44 | 0.00 | 1 | 2 | 2 | DEMVPRLVKLDFDFPGR                        | 1 |
|                                                                                                                                                                                                                                 |      |      |      |      |   |   | 2 | IEYDC[339]ELVPR                          | 1 |
| RECQ1_HUMAN (P46063) ATP-dependent DNA helicase Q1 (EC 3.6.1.-) (DNA-dependent ATPase Q1) [MASS=73456]                                                                                                                          | 0.00 | 7.09 | 1.18 | 0.04 | 2 | 2 | 2 | LINGRYKQSGIYC[339]FSQK                   | 1 |
|                                                                                                                                                                                                                                 |      |      |      |      |   |   | 3 | IAVDEVHC[330]C[330]SQWGHDFRPDYKALGILK    | 1 |
| RECQ5_HUMAN (O94762) ATP-dependent DNA helicase Q5 (EC 3.6.1.-) (RecQ protein-like 5) (RecQ5) [MASS=108858]                                                                                                                     | 0.00 | 3.23 | 1.60 | 0.00 | 1 | 2 | 2 | TREAC[339]EQLAIELSC[339]R                | 1 |
|                                                                                                                                                                                                                                 |      |      |      |      |   |   | 3 | ELFKGFARHLSHLLTQK                        | 1 |
| RED2_HUMAN (Q9NS39) Double-stranded RNA-specific editase B2 (EC 3.5.-.-) (dsRNA adenosine deaminase B2) (RNA-dependent adenosine deaminase 3) (RNA-editing deaminase 2) (RNA-editing enzyme 2) [MASS=80621]                     | *    | 4.74 | *    | *    | * | 2 | 2 | PLLSGVSDAEAR                             | 1 |
|                                                                                                                                                                                                                                 |      |      |      |      |   |   | 3 | GQAAQAALQELFDIQMPGHAPGR                  | 1 |
| RENT2_HUMAN (Q9HAU5) Regulator of nonsense transcripts 2 (Nonsense mRNA reducing factor 2) (Up-frameshift suppressor 2 homolog) (hUpf2) [MASS=147809]                                                                           | 0.00 | 4.56 | 6.05 | 0.00 | 1 | 3 | 3 | LVATLHPC[339]M[147]SDVAEDLC[339]SMLRGDFR | 1 |
|                                                                                                                                                                                                                                 |      |      |      |      |   |   | 3 | AAMDFC[339]M[147]NMNTKANRK               | 1 |
|                                                                                                                                                                                                                                 |      |      |      |      |   |   | 2 | SPESHLRTSVLLEQMMR                        | 1 |

|                                                                                                                                                                                                                                                                   |      |       |       |      |   |   |   |                                       |   |
|-------------------------------------------------------------------------------------------------------------------------------------------------------------------------------------------------------------------------------------------------------------------|------|-------|-------|------|---|---|---|---------------------------------------|---|
| RETBP_HUMAN (P02753) Plasma retinol-binding protein precursor (PRBP) (RBP)<br>[Contains: Plasma retinol-binding protein(1-182); Plasma retinol-binding protein(1-181); Plasma retinol-binding protein(1-179); Plasma retinol-binding protein(1-176)] [MASS=23010] | 0.00 | 10.95 | 0.86  | 0.00 | 1 | 1 | 3 | GNDDHWIVDTDYDTYAVQYSC[330]R           | 1 |
| RF1M_HUMAN (O75570) Peptide chain release factor 1, mitochondrial precursor (MRF-1) [MASS=52305]                                                                                                                                                                  | 0.00 | 3.60  | 0.16  | 0.00 | 1 | 1 | 3 | LVHIPTGLVVEC[330]QQER                 | 1 |
| RGS14_HUMAN (O43566) Regulator of G-protein signaling 14 (RGS14) [MASS=64600]                                                                                                                                                                                     | 0.00 | 3.54  | 10.75 | 0.00 | 1 | 1 | 3 | ALVLDQDC[339]TVLADQEVRLNR             | 1 |
| RGS3_HUMAN (P49796) Regulator of G-protein signaling 3 (RGS3) (RGP3) [MASS=132335]                                                                                                                                                                                | *    | 4.26  | *     | *    | * | 2 | 2 | RSSMIETGQGAEGGLSLRVQNSLR              | 1 |
|                                                                                                                                                                                                                                                                   |      |       |       |      |   |   | 3 | HSC[330]HLVC[330]DSSDGLLLGGWERYTEVAKR | 1 |
|                                                                                                                                                                                                                                                                   |      |       |       |      |   |   | 3 | RSSM[147]IETGQGAEGGLSLRVQNSLR         | 1 |
| RHOA_HUMAN (P61586) Transforming protein RhoA precursor (H12) [MASS=21768]                                                                                                                                                                                        | 0.98 | 14.51 | 0.68  | 0.00 | 1 | 2 | 2 | TKDGVREVFEMATR                        | 1 |
|                                                                                                                                                                                                                                                                   |      |       |       |      |   |   | 2 | HFC[339]PNVPIILVGNK                   | 1 |
| RHOB_HUMAN (P62745) Rho-related GTP-binding protein RhoB precursor (H6) [MASS=22123]                                                                                                                                                                              | 0.94 | 6.12  | 0.27  | 0.00 | 1 | 1 | 2 | IQAYDYLEC[330]SAK                     | 1 |
| RHPN1_HUMAN (Q8TCX5) Rhophilin-1 (GTP-Rho-binding protein 1) [MASS=76292]                                                                                                                                                                                         | *    | 2.45  | *     | *    | * | 1 | 2 | GSVLFNIGALHTQIGAR                     | 1 |
| RIMB1_HUMAN (O95153) Peripheral-type benzodiazepine receptor-associated protein 1 (PRAX-1) (Peripheral benzodiazepine receptor-interacting protein) (PBR-IP) (RIM-binding protein 1) (RIM-BP1) [MASS=200149]                                                      | 0.00 | 2.64  | 0.48  | 0.00 | 1 | 3 | 2 | AKLNM[147]SFGDRPNLELLR                | 1 |
|                                                                                                                                                                                                                                                                   |      |       |       |      |   |   | 2 | C[339]TPKSSEPAPATLTGVPRR              | 1 |
|                                                                                                                                                                                                                                                                   |      |       |       |      |   |   | 2 | ALEPGLASC[330]LSPK                    | 1 |
| RINI_HUMAN (P13489) Ribonuclease inhibitor (Ribonuclease/angiogenin inhibitor 1) (RAI) (Placental ribonuclease inhibitor) (RNase inhibitor) (RI) [MASS=49842]                                                                                                     | 0.00 | 1.96  | 0.75  | 0.00 | 1 | 1 | 2 | C[330]KDISSALR                        | 1 |
| RIOK1_HUMAN (Q9BRS2) Serine/threonine-protein kinase RIO1 (EC 2.7.11.1) (RIO kinase 1) [MASS=65583]                                                                                                                                                               | *    | 3.87  | *     | *    | * | 1 | 2 | LLMSRVVPGQFDDADSSDSENK                | 1 |

|                                                                                                                                                                                 |      |       |      |      |   |   |   |                                                     |   |
|---------------------------------------------------------------------------------------------------------------------------------------------------------------------------------|------|-------|------|------|---|---|---|-----------------------------------------------------|---|
| RIPK4_HUMAN (P57078) Receptor-interacting serine/threonine-protein kinase 4 (EC 2.7.11.1) (Ankyrin repeat domain protein 3) (PKC-delta-interacting protein kinase) [MASS=91610] | 0.00 | 2.76  | 4.09 | 0.00 | 1 | 1 | 3 | C[339]WQGDPRVRPTFQGNGLNGELIR                        | 1 |
| RKHD1_HUMAN (Q86XN8) RING finger and KH domain-containing protein 1 [MASS=49802]                                                                                                | *    | 9.90  | *    | *    | * | 2 | 3 | HSPTLPEPGGLR                                        | 1 |
|                                                                                                                                                                                 |      |       |      |      |   |   | 3 | AGGLPGAAQGPNNLPGQTTIQVRVPYRVVGLVVGPK                | 1 |
| RL14_HUMAN (P50914) 60S ribosomal protein L14 (CAG-ISL 7) [MASS=23158]                                                                                                          | *    | 7.55  | *    | *    | * | 1 | 3 | VPAQKATGQKAAPAPK                                    | 1 |
| RL18A_HUMAN (Q02543) 60S ribosomal protein L18a [MASS=20762]                                                                                                                    | 1.00 | 9.66  | 1.19 | 0.01 | 3 | 2 | 3 | FWYFVSQLK                                           | 1 |
|                                                                                                                                                                                 |      |       |      |      |   |   | 2 | C[339]HTPPLYR                                       | 1 |
|                                                                                                                                                                                 |      |       |      |      |   |   | 2 | C[330]HTPPLYR                                       | 2 |
| RL3_HUMAN (P39023) 60S ribosomal protein L3 (HIV-1 TAR RNA-binding protein B) (TARBP-B) [MASS=45977]                                                                            | *    | 3.73  | *    | *    | * | 1 | 3 | ALEKIDLKFIDTTSK                                     | 1 |
| RL4_HUMAN (P36578) 60S ribosomal protein L4 (L1) [MASS=47566]                                                                                                                   | *    | 4.23  | *    | *    | * | 1 | 2 | VDKAAAAAALQAKSDEK                                   | 1 |
| RL7_HUMAN (P18124) 60S ribosomal protein L7 [MASS=29226]                                                                                                                        | 0.90 | 7.26  | 2.95 | 0.00 | 1 | 1 | 2 | YGIIC[339]MEDLIHEIYTVGK                             | 1 |
| RLA0_HUMAN (P05388) 60S acidic ribosomal protein P0 (L10E) [MASS=34273]                                                                                                         | 0.00 | 3.79  | 3.22 | 0.00 | 1 | 1 | 2 | C[339]FIVGADNVGSK                                   | 1 |
| RM27_HUMAN (Q9P0M9) Mitochondrial 39S ribosomal protein L27 (L27mt) (MRP-L27) [MASS=16073]                                                                                      | 0.00 | 10.81 | 0.16 | 0.00 | 1 | 1 | 2 | NKC[330]LYALEEGIVRYTK                               | 1 |
| RNF17_HUMAN (Q9BXT8) RING finger protein 17 [MASS=73736]                                                                                                                        | *    | 2.60  | *    | *    | * | 1 | 3 | LSVNC[330]SEIIC[339]M[147]FNNMGK                    | 1 |
| RNF4_HUMAN (P78317) RING finger protein 4 [MASS=21319]                                                                                                                          | 0.00 | 21.58 | 0.19 | 0.00 | 1 | 2 | 3 | LPQDHADSC[330]VVSSDDEELSR                           | 1 |
|                                                                                                                                                                                 |      |       |      |      |   |   | 3 | LIVSTEC[330]GHVFC[330]SQC[339]LRDSLK                | 1 |
| RP1_HUMAN (P56715) Oxygen-regulated protein 1 (Retinitis pigmentosa RP1 protein) (Retinitis pigmentosa 1 protein) [MASS=240660]                                                 | 0.00 | 2.78  | 3.25 | 0.00 | 1 | 4 | 3 | SEM[147]SFPGRTER                                    | 1 |
|                                                                                                                                                                                 |      |       |      |      |   |   | 3 | EYNIGFVKRAIEK                                       | 1 |
|                                                                                                                                                                                 |      |       |      |      |   |   | 2 | RLATPPSLDFC[339]YDSK                                | 1 |
|                                                                                                                                                                                 |      |       |      |      |   |   | 3 | KRQSVEAAIQVDPIEETPK                                 | 1 |
| RPC1_HUMAN (O14802) DNA-directed RNA polymerase III largest subunit (EC 2.7.7.6) (RPC155) (RPC1) [MASS=155748]                                                                  | 0.00 | 5.82  | 4.49 | 0.00 | 1 | 3 | 3 | LQQQPGC[330]TAEETLEALILKELSVIR                      | 1 |
|                                                                                                                                                                                 |      |       |      |      |   |   | 3 | GEDLC[339]ANDSYVTIQNSELM[147]SGSM[147]DK            | 1 |
|                                                                                                                                                                                 |      |       |      |      |   |   | 3 | DSVC[330]GVSEC[330]IIM[147]GIPM[147]NIGTGLFKLLHKADR | 1 |

|                                                                                                                                                                                                      |      |       |      |      |   |   |   |                                  |   |
|------------------------------------------------------------------------------------------------------------------------------------------------------------------------------------------------------|------|-------|------|------|---|---|---|----------------------------------|---|
| RPC2_HUMAN (Q9NW08) DNA-directed RNA polymerase III subunit 127.6 kDa polypeptide (EC 2.7.7.6) (RNA polymerase III subunit 2) (RPC2) [MASS=127784]                                                   | 0.00 | 6.18  | 0.76 | 0.00 | 1 | 4 | 2 | GLVKQHIDSFNYFINVEIKK             | 1 |
|                                                                                                                                                                                                      |      |       |      |      |   |   | 3 | LGEM[147]ERDC[330]LIGYGASMLLLER  | 1 |
|                                                                                                                                                                                                      |      |       |      |      |   |   | 2 | KGAVGASVTSSTHEKK                 | 1 |
|                                                                                                                                                                                                      |      |       |      |      |   |   | 2 | FHYGTAFGGSKVK                    | 1 |
| RPC5_HUMAN (Q9NVU0) DNA-directed RNA polymerases III 80 kDa polypeptide (EC 2.7.7.6) (RNA polymerase III subunit 5) (RPC5) [MASS=79898]                                                              | *    | 0.71  | *    | *    | * | 1 | 1 | FTQSR                            | 1 |
| RPTN_HUMAN (Q6XPR3) Repetin [MASS=90730]                                                                                                                                                             | 0.00 | 2.55  | 1.39 | 0.00 | 1 | 1 | 2 | SHGGRTSQQERQEGAQDC[339]K         | 1 |
| RS16_HUMAN (P62249) 40S ribosomal protein S16 [MASS=16314]                                                                                                                                           | 1.00 | 6.21  | 1.06 | 0.00 | 2 | 1 | 2 | TATAVAHC[330]K                   | 1 |
|                                                                                                                                                                                                      |      |       |      |      |   |   | 2 | TATAVAHC[339]K                   | 1 |
| RS2_HUMAN (P15880) 40S ribosomal protein S2 (S4) (LLRep3 protein) [MASS=31324]                                                                                                                       | *    | 14.33 | *    | *    | * | 2 | 3 | ESEIIDFFLGASLKDEVLKIM[147]PVQK   | 1 |
|                                                                                                                                                                                                      |      |       |      |      |   |   | 3 | AFVAIGDYNGHVGLGVK                | 1 |
| RS3A_HUMAN (P61247) 40S ribosomal protein S3a [MASS=29814]                                                                                                                                           | *    | 14.83 | *    | *    | * | 2 | 2 | APAM[147]FNIRNIGKTLVTR           | 1 |
|                                                                                                                                                                                                      |      |       |      |      |   |   | 2 | LM[147]ELHGEGSSSGKATGDETGAK      | 1 |
| RS4X_HUMAN (P62701) 40S ribosomal protein S4, X isoform (Single copy abundant mRNA protein) (SCR10) [MASS=29466]                                                                                     | *    | 9.16  | *    | *    | * | 1 | 3 | FDTGNLC[330]MVTGGANLGRIGVITNR    | 1 |
| RSF1_HUMAN (Q96T23) Remodeling and spacing factor 1 (Rsf-1) (Hepatitis B virus X-associated protein) (HBV pX-associated protein 8) (p325 subunit of RSF chromatin remodelling complex) [MASS=163004] | *    | 4.05  | *    | *    | * | 4 | 2 | VGSPLDYSLVDLPSTNGQSPGK           | 1 |
|                                                                                                                                                                                                      |      |       |      |      |   |   | 1 | RHPSR                            | 1 |
|                                                                                                                                                                                                      |      |       |      |      |   |   | 2 | AQIEEPDPPPEMETSLEDSSEMAK         | 1 |
|                                                                                                                                                                                                      |      |       |      |      |   |   | 2 | KSKANLLER                        | 1 |
| RT22_HUMAN (P82650) Mitochondrial 28S ribosomal protein S22 (S22mt) (MRP-S22) [MASS=41280]                                                                                                           | 0.00 | 5.83  | 0.89 | 0.00 | 1 | 1 | 3 | HVDVLNLC[330]FAQFEPDSTEYIK       | 1 |
| RTN1_HUMAN (Q16799) Reticulon-1 (Neuroendocrine-specific protein) [MASS=83617]                                                                                                                       | 0.89 | 3.99  | 1.85 | 0.00 | 1 | 2 | 2 | REQDSPPMKPSALDAIR                | 1 |
|                                                                                                                                                                                                      |      |       |      |      |   |   | 2 | YTDC[330]LQFYVNSTLK              | 1 |
| RUSC2_HUMAN (Q8N2Y8) RUN and SH3 domain-containing protein 2 [MASS=161194]                                                                                                                           | *    | 1.45  | *    | *    | * | 1 | 3 | EGGYGC[330]PHASSPELDANC[330]NSYR | 1 |

|                                                                                                                                                                                                 |      |      |      |      |   |    |                                                |   |
|-------------------------------------------------------------------------------------------------------------------------------------------------------------------------------------------------|------|------|------|------|---|----|------------------------------------------------|---|
| RYR1_HUMAN (P21817) Ryanodine receptor 1<br>(Skeletal muscle-type ryanodine receptor)<br>(RyR1) (RyR-1) (Skeletal muscle calcium<br>release channel) [MASS=565172]                              | 0.00 | 4.90 | 1.99 | 0.00 | 1 | 11 | 3 SHNFKREEQNFVVQNEINNMSFLTADNK                 | 1 |
|                                                                                                                                                                                                 |      |      |      |      |   |    | 2 VAMM[147]TQPPATPTLPR                         | 1 |
|                                                                                                                                                                                                 |      |      |      |      |   |    | 3 VHLGHAIM[147]SFYAALIDLLGRC[330]APEMHLIQAGK   | 1 |
|                                                                                                                                                                                                 |      |      |      |      |   |    | 3 VLGSGGHASNKEKEMITSLFC[339]K                  | 1 |
|                                                                                                                                                                                                 |      |      |      |      |   |    | 2 WYFEFEAVTTGEM[147]RVGWARPELR                 | 1 |
|                                                                                                                                                                                                 |      |      |      |      |   |    | 2 AQWEM[147]PQVKESKR                           | 1 |
|                                                                                                                                                                                                 |      |      |      |      |   |    | 2 KQAPPSPPPK                                   | 1 |
|                                                                                                                                                                                                 |      |      |      |      |   |    | 2 FAVFVNGESVEENANVVVRLIR                       | 1 |
|                                                                                                                                                                                                 |      |      |      |      |   |    | 3 GETGAM[147]VSSTLKLGISILNGGNAEVQKM[147]LDYLK  | 1 |
|                                                                                                                                                                                                 |      |      |      |      |   |    | 3 VESLAFAERYVDKLANQR                           | 1 |
|                                                                                                                                                                                                 |      |      |      |      |   |    | 3 C[330]APLFAGTEHRAIMVDSM[147]LHTVYRLSR        | 1 |
| RYR2_HUMAN (Q92736) Ryanodine receptor<br>2 (Cardiac muscle-type ryanodine receptor)<br>(RyR2) (RyR-2) (Cardiac muscle ryanodine<br>receptor-calcium release channel) (hRYR-2)<br>[MASS=564495] | 0.00 | 3.62 | 0.92 | 0.00 | 1 | 12 | 2 SILNSLYELLAALIR                              | 1 |
|                                                                                                                                                                                                 |      |      |      |      |   |    | 1 GETGPM[147]VAATLK                            | 1 |
|                                                                                                                                                                                                 |      |      |      |      |   |    | 3 SFGSQNSNTDIM[147]FYRLSM[147]PIEC[330]AEVFSK  | 1 |
|                                                                                                                                                                                                 |      |      |      |      |   |    | 2 GKVHESIKR                                    | 1 |
|                                                                                                                                                                                                 |      |      |      |      |   |    | 2 YNILTLMR                                     | 1 |
|                                                                                                                                                                                                 |      |      |      |      |   |    | 3 WPIKESLKTMLAR                                | 1 |
|                                                                                                                                                                                                 |      |      |      |      |   |    | 2 DMVVMLLSM[147]LEGNVVNGTIGK                   | 1 |
|                                                                                                                                                                                                 |      |      |      |      |   |    | 3 SSENAKVTSLDSSSHR                             | 1 |
|                                                                                                                                                                                                 |      |      |      |      |   |    | 2 VTQKSFSGSQNSNTDIM[147]FYR                    | 1 |
|                                                                                                                                                                                                 |      |      |      |      |   |    | 3 EKAQDILKFLQINGYAVSR                          | 1 |
|                                                                                                                                                                                                 |      |      |      |      |   |    | 2 LVNHVSSMR                                    | 1 |
| 2 EYKQERTYTR                                                                                                                                                                                    | 1    |      |      |      |   |    |                                                |   |
| RYR3_HUMAN (Q15413) Ryanodine receptor<br>3 (Brain-type ryanodine receptor) (RyR3) (RyR-<br>3) (Brain ryanodine receptor-calcium release<br>channel) [MASS=551928]                              | 0.00 | 4.64 | 0.70 | 0.15 | 2 | 11 | 3 IDGTMDSPPC[330]LKVTHKTFGTQNSNADMIYC[339]R    | 2 |
|                                                                                                                                                                                                 |      |      |      |      |   |    | 2 RFAYKFLK                                     | 1 |
|                                                                                                                                                                                                 |      |      |      |      |   |    | 3 SILGM[147]PDTVEDMC[330]PDIPQLEGLMK           | 1 |
|                                                                                                                                                                                                 |      |      |      |      |   |    | 3 M[147]ELFVNFC[330]EDTIFEM[147]QLASQISESDSADR | 1 |
|                                                                                                                                                                                                 |      |      |      |      |   |    | 3 NALDFSPVEETKAEASLVSWLSSIDMK                  | 1 |
|                                                                                                                                                                                                 |      |      |      |      |   |    | 2 GSTPLDVAASSVM[147]DNNELALSLEEPDLEK           | 1 |
|                                                                                                                                                                                                 |      |      |      |      |   |    | 2 SLVPTEDLVGIISPLK                             | 2 |
|                                                                                                                                                                                                 |      |      |      |      |   |    | 3 LPTFVNVPKDHPHIEVM[147]RIDGTMDSPPC[339]LK     | 1 |
|                                                                                                                                                                                                 |      |      |      |      |   |    | 2 TSRLGPLKR                                    | 1 |
|                                                                                                                                                                                                 |      |      |      |      |   |    | 2 APMVLFLLDR                                   | 1 |
|                                                                                                                                                                                                 |      |      |      |      |   |    | 3 NYNLQM[147]STETLK                            | 1 |
| S12A2_HUMAN (P55011) Solute carrier family<br>12 member 2 (Bumetanide-sensitive sodium-<br>(potassium)-chloride cotransporter 1)<br>(Basolateral Na-K-Cl symporter)<br>[MASS=131446]            | *    | 1.24 | *    | *    | * | 1  | 3 DAVVITYAESKGVVK                              | 1 |

|                                                                                                                                                                                                                                                                             |      |      |      |      |   |   |   |                                               |   |
|-----------------------------------------------------------------------------------------------------------------------------------------------------------------------------------------------------------------------------------------------------------------------------|------|------|------|------|---|---|---|-----------------------------------------------|---|
| S12A3_HUMAN (P55017) Solute carrier family 12 member 3 (Thiazide-sensitive sodium-chloride cotransporter) (Na-Cl symporter) [MASS=113138]                                                                                                                                   | *    | 7.44 | *    | *    | * | 4 | 2 | NLSLM[147]IC[339]GHVLI GPHKQR                 | 1 |
|                                                                                                                                                                                                                                                                             |      |      |      |      |   |   | 3 | KIKAFYSDVIAEDLR                               | 1 |
|                                                                                                                                                                                                                                                                             |      |      |      |      |   |   | 3 | C[330]PSSLYM[147]AWLETLSQDLRPPVILIR           | 1 |
|                                                                                                                                                                                                                                                                             |      |      |      |      |   |   | 2 | C[339]PSSLYMAWLETLSQDLR                       | 1 |
| S12A4_HUMAN (Q9UP95) Solute carrier family 12 member 4 (Electroneutral potassium-chloride cotransporter 1) (Erythroid K-Cl cotransporter 1) (hKCC1) [MASS=120649]                                                                                                           | 0.00 | 5.44 | 0.90 | 0.00 | 1 | 3 | 3 | RAAEAPSM[147]GTLMGVYLPC[330]LQNIFGVILFLR      | 1 |
|                                                                                                                                                                                                                                                                             |      |      |      |      |   |   | 3 | GFC[339]QVVVASKVR                             | 1 |
|                                                                                                                                                                                                                                                                             |      |      |      |      |   |   | 3 | MRIFTVAQMDDNSIQM[147]K                        | 1 |
| S27A1_HUMAN (Q6PCB7) Long-chain fatty acid transport protein 1 (EC 6.2.1.-) (Fatty acid transport protein 1) (FATP-1) (Solute carrier family 27 member 1) [MASS=71108]                                                                                                      | *    | 3.41 | *    | *    | * | 1 | 2 | YNC[330]TVVQYIGEIC[330]RYLLKQPVR              | 1 |
| S27A4_HUMAN (Q6P1M0) Long-chain fatty acid transport protein 4 (EC 6.2.1.-) (Fatty acid transport protein 4) (FATP-4) (Solute carrier family 27 member 4) [MASS=72064]                                                                                                      | 0.00 | 4.20 | 1.00 | 0.00 | 1 | 2 | 2 | M[147]LLGASLVGVLLFSKLVLK                      | 1 |
|                                                                                                                                                                                                                                                                             |      |      |      |      |   |   | 2 | HLPSC[339]PDK                                 | 1 |
| S3TC2_HUMAN (Q8TF17) SH3 domain and tetratricopeptide repeats-containing protein 2 [MASS=144776]                                                                                                                                                                            | 0.00 | 4.04 | 0.76 | 0.00 | 1 | 3 | 2 | LWALENEDQEV R                                 | 1 |
|                                                                                                                                                                                                                                                                             |      |      |      |      |   |   | 3 | KSHMTWAHARLC[330]FLLGR                        | 1 |
|                                                                                                                                                                                                                                                                             |      |      |      |      |   |   | 2 | LTELQISLEGYEKALEFATLAAR                       | 1 |
| SAM50_HUMAN (Q9Y512) Sorting and assembly machinery component 50 homolog [MASS=51962]                                                                                                                                                                                       | 1.00 | 7.89 | 1.07 | 0.05 | 3 | 3 | 2 | THFFLNAGNLC[330]NLNYGEGPK                     | 1 |
|                                                                                                                                                                                                                                                                             |      |      |      |      |   |   | 2 | THFFLNAGNLC[339]NLNYGEGPK                     | 1 |
|                                                                                                                                                                                                                                                                             |      |      |      |      |   |   | 2 | KLAEC[339]IIR                                 | 1 |
|                                                                                                                                                                                                                                                                             |      |      |      |      |   |   | 2 | EKLLRLGIFR                                    | 1 |
| SAMD4_HUMAN (Q9UPU9) Sterile alpha motif domain-containing protein 4 [MASS=58610]                                                                                                                                                                                           | *    | 4.54 | *    | *    | * | 1 | 2 | QNLWFANPGGSNSMPSRTHSSVQR                      | 1 |
| SAP_HUMAN (P07602) Proactivator polypeptide precursor [Contains: Saposin A (Protein A); Saposin B-Val; Saposin B (Sphingolipid activator protein 1) (SAP-1) (Cerebroside sulfate activator) (CSAct) (Dispersin) (Sulfatide/GM1 activator); Saposin C (Co-beta- [MASS=58112] | 1.00 | 7.63 | 2.22 | 0.06 | 3 | 2 | 3 | QC[339]DQFVAEYEPV LIEILVEVM[147]DPSFVC[339]LK | 1 |
|                                                                                                                                                                                                                                                                             |      |      |      |      |   |   | 2 | GC[339]SFLPDPYQK                              | 2 |
| SATB2_HUMAN (Q9UPW6) DNA-binding protein SATB2 (Special AT-rich sequence-binding protein 2) [MASS=82555]                                                                                                                                                                    | *    | 4.37 | *    | *    | * | 1 | 3 | PNGAVAKAVGGLMIPVFC[339]VVEQLDGSLEYDNR         | 1 |

|                                                                                                                                                                                                                                                                 |      |       |      |      |   |   |   |                                               |   |
|-----------------------------------------------------------------------------------------------------------------------------------------------------------------------------------------------------------------------------------------------------------------|------|-------|------|------|---|---|---|-----------------------------------------------|---|
| SATT_HUMAN (P43007) Neutral amino acid transporter A (SATT) (Alanine/serine/cysteine/threonine transporter) (ASCT1) [MASS=55723]                                                                                                                                | 1.00 | 2.07  | 0.42 | 0.08 | 3 | 1 | 2 | C[339]IEENNGVDKR                              | 2 |
|                                                                                                                                                                                                                                                                 |      |       |      |      |   |   | 2 | C[330]IEENNGVDKR                              | 1 |
| SC11A_HUMAN (Q9UI33) Sodium channel protein type 11 subunit alpha (Sodium channel protein type XI subunit alpha) (Voltage-gated sodium channel subunit alpha Nav1.9) (Sensory neuron sodium channel 2) (Peripheral nerve sodium channel 5) (hNaN) [MASS=204947] | *    | 1.17  | *    | *    | * | 1 | 2 | NVAAEIEAKEKMFQEAQQLK                          | 1 |
| SC5A1_HUMAN (P13866) Sodium/glucose cotransporter 1 (Na <sup>+</sup> )/glucose cotransporter 1) (High affinity sodium-glucose cotransporter) [MASS=73498]                                                                                                       | *    | 3.16  | *    | *    | * | 1 | 2 | VGC[330]TNIAYPTLVVELM[147]PNGLR               | 1 |
| SC5A3_HUMAN (P53794) Sodium/myo-inositol cotransporter (Na <sup>+</sup> )/myo-inositol cotransporter) [MASS=79693]                                                                                                                                              | *    | 6.13  | *    | *    | * | 2 | 3 | M[147]RAVLDTADIAIVALYFILVM[147]C[339]IGFFAMWK | 1 |
|                                                                                                                                                                                                                                                                 |      |       |      |      |   |   | 2 | AGC[330]SNIAYPRLVM[147]K                      | 1 |
| SC6A5_HUMAN (Q9Y345) Sodium- and chloride-dependent glycine transporter 2 (GlyT2) (GlyT-2) (Solute carrier family 6 member 5) [MASS=87359]                                                                                                                      | 0.00 | 1.63  | 2.34 | 0.00 | 1 | 1 | 3 | AC[339]EAERPGVGSC[339]K                       | 1 |
| SCAR3_HUMAN (Q6AZY7) Scavenger receptor class A member 3 (Cellular stress response gene protein) [MASS=65136]                                                                                                                                                   | 0.00 | 5.12  | 1.02 | 0.00 | 1 | 1 | 3 | SAGGDGDALC[339]VTEEDLAGDDEDMPFPC[339]TQK      | 1 |
| SCN8A_HUMAN (Q9UQD0) Sodium channel protein type 8 subunit alpha (Sodium channel protein type VIII subunit alpha) (Voltage-gated sodium channel subunit alpha Nav1.6) [MASS=225279]                                                                             | *    | 0.91  | *    | *    | * | 1 | 3 | C[339]C[339]QVNIEEGLGKSWWILR                  | 1 |
| SCOT2_HUMAN (Q9BYC2) Succinyl-CoA:3-ketoacid-coenzyme A transferase 2, mitochondrial precursor (EC 2.8.3.5) (Testis-specific succinyl CoA:3-oxoacid CoA-transferase) (SCOT-t) [MASS=56140]                                                                      | 0.00 | 14.12 | 0.35 | 0.00 | 1 | 3 | 3 | IRAGGAGVPAFYTPTGYGTLVQEGGAPIR                 | 1 |
|                                                                                                                                                                                                                                                                 |      |       |      |      |   |   | 2 | C[330]VDRIITEKAVFDVHR                         | 1 |
|                                                                                                                                                                                                                                                                 |      |       |      |      |   |   | 3 | GGHIQLTM[147]LGAMQVSKYGDLANWM[147]IPGK        | 1 |



|                                                                                                                                                                                                                                                                             |      |       |      |      |   |   |   |                                         |   |
|-----------------------------------------------------------------------------------------------------------------------------------------------------------------------------------------------------------------------------------------------------------------------------|------|-------|------|------|---|---|---|-----------------------------------------|---|
| SCOT_HUMAN (P55809) Succinyl-CoA:3-ketoacid-coenzyme A transferase 1, mitochondrial precursor (EC 2.8.3.5) (Somatic-type succinyl CoA:3-oxoacid CoA-transferase) (Scot-S) [MASS=56157]                                                                                      | 1.00 | 12.31 | 1.42 | 0.04 | 6 | 4 | 3 | DIPDGATVLVGGFGLC[339]GIPENLIDALLK       | 2 |
|                                                                                                                                                                                                                                                                             |      |       |      |      |   |   | 1 | GEKYEK                                  | 1 |
|                                                                                                                                                                                                                                                                             |      |       |      |      |   |   | 2 | DIPDGATVLVGGFGLC[330]GIPENLIDALLK       | 1 |
|                                                                                                                                                                                                                                                                             |      |       |      |      |   |   | 3 | ETVTILPGASFFSSEDEFAM[147]IR             | 1 |
|                                                                                                                                                                                                                                                                             |      |       |      |      |   |   | 2 | DIPDGATVLVGGFGLC[339]GIPENLIDALLK       | 2 |
|                                                                                                                                                                                                                                                                             |      |       |      |      |   |   | 2 | NFNLPM[147]C[339]K                      | 1 |
| SCRB1_HUMAN (Q8WTV0) Scavenger receptor class B member 1 (SRB1) (SR-BI) (CD36 antigen-like 1) (CD36 and LIMPII analogous 1) (CLA-1) (Collagen type I receptor, thrombospondin receptor-like 1) [MASS=60878]                                                                 | *    | 5.62  | *    | *    | * | 1 | 3 | ARWAAGALGVAGLLC[339]AVLGAVMIVMVP SLIK   | 1 |
| SCYB7_HUMAN (P02775) Platelet basic protein precursor (PBP) (Small inducible cytokine B7) (CXCL7) (Leukocyte-derived growth factor) (LDGF) (Macrophage-derived growth factor) (MDGF) [Contains: Connective tissue-activating peptide III (CTAP-III) (Low-affin [MASS=13894] | 0.00 | 17.97 | 1.67 | 0.00 | 1 | 1 | 3 | C[339]M[147]C[339]IKTTSGIHPKNIQSLEVIGK  | 1 |
| SELO_HUMAN (Q9BVL4) Selenoprotein O [MASS=73442]                                                                                                                                                                                                                            | 0.00 | 1.20  | 1.11 | 0.00 | 1 | 1 | 2 | C[330]SPSPAPR                           | 1 |
|                                                                                                                                                                                                                                                                             |      |       |      |      |   |   | 2 | C[339]SPSPAPR                           | 1 |
| SEM4G_HUMAN (Q9NTN9) Semaphorin-4G precursor [MASS=91496]                                                                                                                                                                                                                   | 0.00 | 4.53  | 2.20 | 0.00 | 1 | 2 | 2 | GDDVLLPC[339]DQPSNLAR                   | 1 |
|                                                                                                                                                                                                                                                                             |      |       |      |      |   |   | 2 | PSRELDATPRM[147]TIPYEELSGTR             | 1 |
| SEM5B_HUMAN (Q9P283) Semaphorin-5B precursor [MASS=119866]                                                                                                                                                                                                                  | *    | 0.73  | *    | *    | * | 1 | 2 | REPLRSLR                                | 1 |
| SEPT5_HUMAN (Q99719) Septin-5 (Peanut-like protein 1) (Cell division control-related protein 1) (CDCrel-1) [MASS=42777]                                                                                                                                                     | 0.61 | 2.98  | 0.72 | 0.00 | 1 | 1 | 2 | ADC[330]LVPSEIRK                        | 1 |
|                                                                                                                                                                                                                                                                             |      |       |      |      |   |   | 2 | ADTLTPEEC[330]QQFKK                     | 1 |
| SEPT7_HUMAN (Q16181) Septin-7 (CDC10 protein homolog) [MASS=50680]                                                                                                                                                                                                          | 1.00 | 11.44 | 0.79 | 0.07 | 3 | 3 | 3 | M[147]EMEMEQVFEM[147]K                  | 1 |
|                                                                                                                                                                                                                                                                             |      |       |      |      |   |   | 2 | ADTLTPEEC[339]QQFKK                     | 1 |
|                                                                                                                                                                                                                                                                             |      |       |      |      |   |   | 2 | VQC[330]C[330]LYFIAPSGHGLKPLDIEFM[147]K | 1 |
| SERA_HUMAN (O43175) D-3-phosphoglycerate dehydrogenase (EC 1.1.1.95) (3-PGDH) [MASS=56519]                                                                                                                                                                                  | *    | 3.95  | *    | *    | * | 1 | 2 | LQVVGRAGTGVNDVDLEAATR                   | 1 |
| SETBP_HUMAN (Q9Y6X0) SET-binding protein (SEB) [MASS=169631]                                                                                                                                                                                                                | *    | 2.98  | *    | *    | * | 3 | 3 | TMPNLQPISALPTKTQK                       | 1 |
|                                                                                                                                                                                                                                                                             |      |       |      |      |   |   | 3 | EKQKQHSEAGHK                            | 1 |
|                                                                                                                                                                                                                                                                             |      |       |      |      |   |   | 2 | KGSAGNTWSQLSNNNK                        | 1 |

|                                                                                                                                                                                                                                                                              |      |       |      |      |   |   |   |                                       |   |
|------------------------------------------------------------------------------------------------------------------------------------------------------------------------------------------------------------------------------------------------------------------------------|------|-------|------|------|---|---|---|---------------------------------------|---|
| SETX_HUMAN (Q7Z333) Probable helicase senataxin (EC 3.6.1.-) (SEN1 homolog) [MASS=302951]                                                                                                                                                                                    | 0.00 | 5.53  | 0.68 | 0.00 | 1 | 7 | 3 | YPYLLLHERVNELC[339]VEALC[339]R        | 1 |
|                                                                                                                                                                                                                                                                              |      |       |      |      |   |   | 2 | NDIQDLHEYHSGYVHK                      | 1 |
|                                                                                                                                                                                                                                                                              |      |       |      |      |   |   | 3 | MEQANC[339]SFQVFDKHPGIYFLVHPNEMVR     | 1 |
|                                                                                                                                                                                                                                                                              |      |       |      |      |   |   | 2 | SDYNC[339]TGGTEVLANSNRK               | 1 |
|                                                                                                                                                                                                                                                                              |      |       |      |      |   |   | 2 | ENDLVFLAPERINEEK                      | 1 |
|                                                                                                                                                                                                                                                                              |      |       |      |      |   |   | 3 | C[330]LAPIANTTNGQGC[339]TDYVSEVVK     | 1 |
| SFR14_HUMAN (Q8IX01) Putative splicing factor, arginine/serine-rich 14 (Arginine/serine-rich-splicing factor 14) [MASS=120236]                                                                                                                                               | 0.00 | 2.40  | 1.22 | 0.00 | 1 | 2 | 2 | MLASFKC[330]SLK                       | 1 |
|                                                                                                                                                                                                                                                                              |      |       |      |      |   |   | 2 | C[339]SLKPEHRDFC[339]FFTIK            | 1 |
|                                                                                                                                                                                                                                                                              |      |       |      |      |   |   |   |                                       |   |
| SFRP2_HUMAN (Q96HF1) Secreted frizzled-related protein 2 precursor (sFRP-2) (Secreted apoptosis-related protein 1) (SARP-1) (Frizzled-related protein 2) (FRP-2) [MASS=33490]                                                                                                | 0.00 | 7.46  | 1.16 | 0.00 | 1 | 1 | 3 | SNC[330]KPIPANLQLC[330]HGIEYQNM[147]R | 1 |
| SFXN1_HUMAN (Q9H9B4) Sideroflexin-1 (Tricarboxylate carrier protein) (TCC) [MASS=35488]                                                                                                                                                                                      | 0.67 | 10.59 | 1.11 | 0.00 | 1 | 2 | 2 | FVPFAAVAAANC[330]INIPLM[147]R         | 1 |
|                                                                                                                                                                                                                                                                              |      |       |      |      |   |   | 3 | QGIVPPGLTENELWR                       | 1 |
| SGOL2_HUMAN (Q562F6) Shugoshin-like 2 (Tripin) [MASS=144738]                                                                                                                                                                                                                 | *    | 1.66  | *    | *    | * | 2 | 2 | LNVSLASKIK                            | 1 |
|                                                                                                                                                                                                                                                                              |      |       |      |      |   |   | 2 | TQKQSTTTLNK                           | 1 |
| SHPS1_HUMAN (P78324) Tyrosine-protein phosphatase non-receptor type substrate 1 precursor (SHP substrate 1) (SHPS-1) (Inhibitory receptor SHPS-1) (Signal-regulatory protein alpha-1) (Sirp-alpha-1) (Sirp-alpha-2) (Sirp-alpha-3) (MyD-1 antigen) (Brain Ig-I) [MASS=54812] | 1.00 | 6.76  | 0.45 | 0.59 | 8 | 2 | 3 | ATPQHTVSFTC[330]ESHGFSPR              | 2 |
|                                                                                                                                                                                                                                                                              |      |       |      |      |   |   | 2 | ATPQHTVSFTC[339]ESHGFSPR              | 1 |
|                                                                                                                                                                                                                                                                              |      |       |      |      |   |   | 3 | LTC[330]QVEHDGQPAVSK                  | 1 |
|                                                                                                                                                                                                                                                                              |      |       |      |      |   |   | 2 | LTC[339]QVEHDGQPAVSK                  | 2 |
|                                                                                                                                                                                                                                                                              |      |       |      |      |   |   | 2 | LTC[330]QVEHDGQPAVSK                  | 2 |
| SI1L1_HUMAN (O43166) Signal-induced proliferation-associated 1-like protein 1 (High-risk human papilloma viruses E6 oncoproteins targeted protein 1) (E6-targeted protein 1) [MASS=199940]                                                                                   | 0.00 | 2.77  | 0.64 | 0.00 | 1 | 3 | 2 | VVIIPPHDDC[330]TPRR                   | 1 |
|                                                                                                                                                                                                                                                                              |      |       |      |      |   |   | 3 | AANIPRSISSDGRPLER                     | 1 |
|                                                                                                                                                                                                                                                                              |      |       |      |      |   |   | 3 | TLSDESIYNSQREHFFTSR                   | 1 |
| SIM2_HUMAN (Q14190) Single-minded homolog 2 [MASS=73218]                                                                                                                                                                                                                     | 0.00 | 3.00  | 2.57 | 0.00 | 1 | 1 | 2 | SSRPHC[339]IVSVNYVLTEIEYK             | 1 |
| SIRB1_HUMAN (O00241) Signal-regulatory protein beta-1 precursor (SIRP-beta-1) (CD172b antigen) [MASS=43255]                                                                                                                                                                  | 0.00 | 8.29  | 0.37 | 0.00 | 1 | 2 | 3 | GLQLTWLENGNVS                         | 3 |
|                                                                                                                                                                                                                                                                              |      |       |      |      |   |   | 2 | ATPEHTVSFTC[330]ESHGFSPR              | 1 |

|                                                                                                                                                                                                                                                                              |      |      |      |      |   |   |             |                                                                  |             |
|------------------------------------------------------------------------------------------------------------------------------------------------------------------------------------------------------------------------------------------------------------------------------|------|------|------|------|---|---|-------------|------------------------------------------------------------------|-------------|
| SLIT1_HUMAN (O75093) Slit homolog 1 protein precursor (Slit-1) (Multiple epidermal growth factor-like domains 4) [MASS=167924]                                                                                                                                               | *    | 3.00 | *    | *    | * | 3 | 1<br>3<br>2 | C[339]EEGQEEGGC[339]LPR<br>LTKIPERIPQSTAELR<br>SLNSLVLYGNKITDLPR | 1<br>1<br>1 |
| SLIT3_HUMAN (O75094) Slit homolog 3 protein precursor (Slit-3) (Multiple epidermal growth factor-like domains 5) [MASS=167685]                                                                                                                                               | 0.00 | 0.85 | 0.38 | 0.00 | 1 | 1 | 2           | LC[330]ETDNDDC[330]VAHK                                          | 1           |
| SMCA1_HUMAN (P28370) Probable global transcription activator SNF2L1 (EC 3.6.1.-) (ATP-dependent helicase SMARCA1) (SWI/SNF-related matrix-associated actin-dependent regulator of chromatin subfamily A member 1) [MASS=114731]                                              | 0.00 | 1.95 | 9.78 | 0.00 | 1 | 2 | 3<br>2      | FLIC[330]MLHKM[147]GFDR<br>GYEYC[339]R                           | 1<br>2      |
| SMCE1_HUMAN (Q969G3) SWI/SNF-related matrix-associated actin-dependent regulator of chromatin subfamily E member 1 (BRG1-associated factor 57) [MASS=46649]                                                                                                                  | 0.00 | 3.16 | 0.12 | 0.48 | 4 | 1 | 2           | RLC[330]GLKVEVDM[147]EK                                          | 6           |
| SMOC1_HUMAN (Q9H4F8) SPARC-related modular calcium-binding protein 1 precursor (Secreted modular calcium-binding protein 1) (SMOC-1) [MASS=48162]                                                                                                                            | 0.45 | 2.30 | 0.75 | 0.00 | 1 | 1 | 2           | SYESM[147]C[330]EYQR                                             | 1           |
| SMOO_HUMAN (P53814) Smoothelin [MASS=99516]                                                                                                                                                                                                                                  | 0.00 | 3.71 | 0.83 | 0.00 | 1 | 1 | 3           | LQDGTPQAALSPLTPRKAPGPLPHQHHPG[339]VLLQR                          | 1           |
| SMRA3_HUMAN (Q14527) SWI/SNF-related matrix-associated actin-dependent regulator of chromatin subfamily A member 3 (EC 3.6.1.-) (Sucrose nonfermenting protein 2-like 3) (DNA-binding protein/plasminogen activator inhibitor 1 regulator) (Helicase-like tran [MASS=113928] | *    | 2.58 | *    | *    | * | 1 | 3           | AGPSYSM[147]PVHAAVQM[147]TTEQLKTEFDK                             | 1           |
| SMRC1_HUMAN (Q92922) SWI/SNF-related matrix-associated actin-dependent regulator of chromatin subfamily C member 1 (SWI/SNF complex 155 kDa subunit) (BRG1-associated factor 155) [MASS=122752]                                                                              | *    | 1.27 | *    | *    | * | 1 | 3           | QNFHMEQLKYAELR                                                   | 1           |

|                                                                                                                                                                                                                  |      |       |      |      |   |   |   |                                                                                            |             |
|------------------------------------------------------------------------------------------------------------------------------------------------------------------------------------------------------------------|------|-------|------|------|---|---|---|--------------------------------------------------------------------------------------------|-------------|
| SMYD3_HUMAN (Q9H7B4) SET and MYND domain-containing protein 3 (EC 2.1.1.43) (Zinc finger MYND domain-containing protein 1) [MASS=49083]                                                                          | *    | 8.64  | *    | *    | * | 2 | 2 | MEPLKVEKFATANR<br>DIEVGEELTIC[330]YLDM[147]LM[147]TSEERR                                   | 1<br>1      |
| SMYD4_HUMAN (Q8IYR2) SET and MYND domain-containing protein 4 [MASS=89122]                                                                                                                                       | *    | 5.10  | *    | *    | * | 2 | 2 | FQEKDYTGAAVLYSK<br>M[147]AAGPRWEAFC[339]C[339]NSC[339]GAPMQGDDVLR                          | 1<br>1      |
| SNAB_HUMAN (Q9H115) Beta-soluble NSF attachment protein (SNAP-beta) (N-ethylmaleimide-sensitive factor attachment protein, beta) [MASS=33557]                                                                    | 1.00 | 7.72  | 1.03 | 0.00 | 2 | 2 | 2 | AALC[339]HFIVDELNAK<br>VKASHSFLR<br>AALC[330]HFIVDELNAK                                    | 1<br>1<br>1 |
| SNTB2_HUMAN (Q13425) Beta-2-syntrophin (59 kDa dystrophin-associated protein A1 basic component 2) (Syntrophin 3) (SNT3) (Syntrophin-like) (SNTL) [MASS=57949]                                                   | 0.00 | 8.33  | 0.29 | 0.00 | 1 | 3 | 3 | M[147]RVAATAAAGAGPAMAVWTRATK<br>DLLLYDC[330]MPWTR<br>AGLVELLR                              | 1<br>1<br>1 |
| SNX23_HUMAN (Q96L93) Kinesin-like motor protein C20orf23 (Sorting nexin-23) [MASS=152010]                                                                                                                        | *    | 3.49  | *    | *    | * | 3 | 2 | GEVQWVEEEK<br>RQEEETFLRVQEELQR<br>LQDLHRVISEGC[330]STSADTMK                                | 1<br>1<br>1 |
| SO5A1_HUMAN (Q9H2Y9) Solute carrier organic anion transporter family member 5A1 (Solute carrier family 21 member 15) (Organic anion transporter polypeptide-related protein 4) (OATP-RP4) (OATPRP4) [MASS=91878] | 0.00 | 3.30  | 0.76 | 0.00 | 1 | 1 | 3 | SSEGLLVSC[330]FDIGNLVVVVFSYFGGR                                                            | 1           |
| SODC_HUMAN (P00441) Superoxide dismutase [Cu-Zn] (EC 1.15.1.1) [MASS=15804]                                                                                                                                      | 1.00 | 25.49 | 0.78 | 0.00 | 2 | 2 | 3 | GLTEGLHGFHVHEFGDNTAGC[330]TSAGPHFNPLSR<br>GLTEGLHGFHVHEFGDNTAGC[339]TSAGPHFNPLSR<br>VWGSIK | 1<br>1<br>2 |
| SOM2_HUMAN (P01242) Growth hormone variant precursor (GH-V) (Placenta-specific growth hormone) (Growth hormone 2) [MASS=24999]                                                                                   | 0.00 | 11.06 | *    | *    | * | 1 | 3 | TGQIFNQSYSKFDTKSHNDALLK<br>TGQIFNQSYSKFDTKSHNDALLK                                         | 1<br>1      |
| SON_HUMAN (P18583) SON protein (SON3) (Negative regulatory element-binding protein) (NRE-binding protein) (DBP-5) (Bax antagonist selected in saccharomyces 1) (BASS1) [MASS=263845]                             | *    | 0.33  | *    | *    | * | 1 | 2 | DDYEIVFK                                                                                   | 1           |
| SORCN_HUMAN (P30626) Sorcin (22 kDa protein) (CP-22) (V19) [MASS=21676]                                                                                                                                          | 0.00 | 20.20 | 0.69 | 0.00 | 1 | 2 | 3 | PFNLETC[339]RLM[147]VSMLDRDMSGTMGFNEFK<br>ITFDDYIAC[330]C[330]VK                           | 1<br>1      |

|                                                                                                                                                                                                                     |      |       |      |      |   |   |                            |                                                                                                                                              |                            |
|---------------------------------------------------------------------------------------------------------------------------------------------------------------------------------------------------------------------|------|-------|------|------|---|---|----------------------------|----------------------------------------------------------------------------------------------------------------------------------------------|----------------------------|
| SORT_HUMAN (Q99523) Sortilin precursor (Neurotensin receptor 3) (NTR3) (NT3) (Glycoprotein 95) (Gp95) (100 kDa NT receptor) [MASS=92067]                                                                            | 0.48 | 1.08  | 1.03 | 0.00 | 1 | 1 | 2                          | C[330]QGGVNPVR                                                                                                                               | 1                          |
| SPAG1_HUMAN (Q07617) Sperm-associated antigen 1 (Infertility-related sperm protein Spag-1) (HSD-3.8) [MASS=103600]                                                                                                  | 0.00 | 1.40  | 0.13 | 0.00 | 1 | 1 | 2                          | AAQPC[330]VMGNIQKK                                                                                                                           | 1                          |
| SPAG6_HUMAN (O75602) Sperm-associated antigen 6 (PF16 protein homolog) (Sperm flagellar protein) (Repro-SA-1) [MASS=55476]                                                                                          | 0.00 | 9.04  | 1.92 | 0.00 | 1 | 2 | 3<br>2                     | HNAELSQAVVDAGAVPLLVLVC[339]IQEPEIALKR<br>MSQRQLVQVFEQYQK                                                                                     | 1<br>1                     |
| SPAG8_HUMAN (Q99932) Sperm-associated antigen 8 (Sperm membrane protein 1) (SMP-1) (HSD-1) (Sperm membrane protein BS-84) [MASS=44818]                                                                              | *    | 4.93  | *    | *    | * | 1 | 2                          | ATNHLDQVPSMQDGSSEFFFR                                                                                                                        | 1                          |
| SPAST_HUMAN (Q9UBP0) Spastin [MASS=67197]                                                                                                                                                                           | 0.00 | 10.71 | 2.02 | 0.00 | 1 | 3 | 2<br>2<br>2                | ELQPSIIFIDEVDSLLC[339]JER<br>MTDGYSGLDATALAKDAALGPIR<br>GIEELEKGIIVITGQGEQC[339]ERAR                                                         | 1<br>1<br>1                |
| SPP24_HUMAN (Q13103) Secreted phosphoprotein 24 precursor (Spp-24) (Secreted phosphoprotein 2) [MASS=24338]                                                                                                         | 0.80 | 12.32 | 0.40 | 0.00 | 1 | 1 | 3                          | DYYVSTAVC[330]RSTVKVSAQQVQGVHAR                                                                                                              | 1                          |
| SPSY_HUMAN (P52788) Spermine synthase (EC 2.5.1.22) (Spermidine aminopropyltransferase) (SPMSY) [MASS=41268]                                                                                                        | 0.00 | 8.74  | *    | *    | * | 2 | 2<br>3                     | LKPKM[147]VTM[147]VEIDQM[147]VIDGC[330]K<br>LPPIVRGGIDR                                                                                      | 1<br>1                     |
| SPT5H_HUMAN (O00267) Transcription elongation factor SPT5 (hSPT5) (DRB sensitivity-inducing factor large subunit) (DSIF large subunit) (DSIF p160) (Tat-cotransactivator 1 protein) (Tat-CT1 protein) [MASS=120999] | 0.00 | 5.43  | 0.10 | 0.00 | 1 | 3 | 2<br>3<br>3                | LQNLWRDQREEELGEYYMK<br>ISSPMHPSAGGQRGGFGSPGGGSGGM[147]SR<br>KLVENGGM[147]FVC[330]K                                                           | 1<br>1<br>1                |
| SPTA2_HUMAN (Q13813) Spectrin alpha chain, brain (Spectrin, non-erythroid alpha chain) (Alpha-II spectrin) (Fodrin alpha chain) [MASS=284537]                                                                       | 0.00 | 4.45  | 0.59 | 0.00 | 1 | 6 | 3<br>3<br>3<br>3<br>2<br>2 | RLEAELAAHEPAIQGVLDTGKK<br>LQQSHPLSATQIQVKR<br>EANKQQNFNTGIK<br>REELITNWEQIR<br>TYLLDGSC[330]M[147]VEESGTLESQLEATK<br>EKEPIVGSTDYGKDEDSAEALLK | 1<br>1<br>1<br>1<br>1<br>1 |

|                                                                                                                                                                              |      |       |      |      |   |   |   |                                                    |   |
|------------------------------------------------------------------------------------------------------------------------------------------------------------------------------|------|-------|------|------|---|---|---|----------------------------------------------------|---|
| SPTA3_HUMAN (Q8NHX4) Spermatogenesis-associated protein 3 (Testis spermatocyte apoptosis-related protein 1) (Testis and spermatogenesis cell-related protein 1) [MASS=19949] | 0.00 | 10.93 | 2.43 | 0.00 | 1 | 1 | 2 | RSSC[339]C[339]LLSPDANVKAAPQSR                     | 1 |
| SPTB1_HUMAN (P11277) Spectrin beta chain, erythrocyte (Beta-I spectrin) [MASS=246189]                                                                                        | *    | 4.54  | *    | *    | * | 5 | 3 | LQTAYAGEKAEAIQNKEQEVSAAWQALLDAC[339]AGR            | 1 |
|                                                                                                                                                                              |      |       |      |      |   |   | 1 | SDDPGK                                             | 1 |
|                                                                                                                                                                              |      |       |      |      |   |   | 3 | AWLQDAHRLLSGEDVVGQDEGATR                           | 1 |
|                                                                                                                                                                              |      |       |      |      |   |   | 2 | VLSPVDSGNKLVAEGNLYSDK                              | 1 |
|                                                                                                                                                                              |      |       |      |      |   |   | 2 | GKM[147]RIHC[339]LENVDK                            | 1 |
| SPTB2_HUMAN (Q01082) Spectrin beta chain, brain 1 (Spectrin, non-erythroid beta chain 1) (Beta-II spectrin) (Fodrin beta chain) [MASS=274629]                                | *    | 1.78  | *    | *    | * | 2 | 3 | IEKEGM[147]QLISEKPETEAVVK                          | 1 |
|                                                                                                                                                                              |      |       |      |      |   |   | 2 | DVSSVELLMNNHQGIKAEIDAR                             | 1 |
| SPTN2_HUMAN (O15020) Spectrin beta chain, brain 2 (Spectrin, non-erythroid beta chain 2) (Beta-III spectrin) [MASS=271293]                                                   | *    | 5.40  | *    | *    | * | 6 | 2 | QLVSEGNIHADK                                       | 1 |
|                                                                                                                                                                              |      |       |      |      |   |   | 3 | LEDALRAQQFYRDAAEAEAWMGEQELHMM[147]GQEK             | 1 |
|                                                                                                                                                                              |      |       |      |      |   |   | 2 | LWIDEKMLTAQDVSYDEAR                                | 1 |
|                                                                                                                                                                              |      |       |      |      |   |   | 3 | ADRFSSC[339]IDMGK                                  | 1 |
|                                                                                                                                                                              |      |       |      |      |   |   | 3 | AVRELMLWMDEVNLMQ[147]DAQERPR                       | 1 |
|                                                                                                                                                                              |      |       |      |      |   |   | 3 | VVNAAIATASSASGEPEEPVVPSTTRGM[147]TR                | 1 |
| SPYA_HUMAN (P21549) Serine--pyruvate aminotransferase (EC 2.6.1.51) (SPT) (Alanine-glyoxylate aminotransferase) (EC 2.6.1.44) (AGT) [MASS=43010]                             | 0.00 | 5.10  | 0.98 | 0.00 | 1 | 1 | 2 | C[339]LLLLVDSVASLGGTPLYMDR                         | 1 |
| SQRD_HUMAN (Q9Y6N5) Sulfide:quinone oxidoreductase, mitochondrial precursor (EC 1.-.-) [MASS=49960]                                                                          | *    | 3.11  | *    | *    | * | 1 | 3 | ADLMPFLYWNMM[147]LR                                | 1 |
| SRC_HUMAN (P12931) Proto-oncogene tyrosine-protein kinase Src (EC 2.7.10.2) (p60-Src) (c-Src) (pp60c-src) [MASS=59703]                                                       | *    | 4.49  | *    | *    | * | 1 | 3 | GYRMPC[330]PPEC[339]PESLHDLML[147]C[339]QC[339]WRK | 1 |
| SSDH_HUMAN (P51649) Succinate semialdehyde dehydrogenase, mitochondrial precursor (EC 1.2.1.24) (NAD(+)-dependent succinic semialdehyde dehydrogenase) [MASS=57214]          | 1.00 | 5.79  | 1.46 | 0.05 | 3 | 1 | 3 | NFFEPTLLC[339]NVTQDMLC[339]THEETFGPLAPVIK          | 2 |
|                                                                                                                                                                              |      |       |      |      |   |   | 3 | NFFEPTLLC[339]NVTQDMLC[330]THEETFGPLAPVIK          | 1 |
|                                                                                                                                                                              |      |       |      |      |   |   | 3 | NFFEPTLLC[339]NVTQDM[147]LC[339]THEETFGPLAPVIK     | 1 |
| ST18_HUMAN (O60284) Suppression of tumorigenicity protein 18 (Zinc finger protein 387) [MASS=115154]                                                                         | 0.00 | 2.10  | 0.93 | 0.00 | 1 | 2 | 2 | GC[339]VFHNTYK                                     | 1 |
|                                                                                                                                                                              |      |       |      |      |   |   | 3 | TASGC[339]PLAAKRQK                                 | 1 |

|                                                                                                                                                                                                                                                                            |      |       |      |      |   |   |   |                                    |   |
|----------------------------------------------------------------------------------------------------------------------------------------------------------------------------------------------------------------------------------------------------------------------------|------|-------|------|------|---|---|---|------------------------------------|---|
| ST1B1_HUMAN (O43704) Sulfotransferase family cytosolic 1B member 1 (EC 2.8.2.-) (Sulfotransferase 1B2) (Thyroid hormone sulfotransferase) [MASS=34899]                                                                                                                     | 0.00 | 12.50 | 0.77 | 0.00 | 1 | 2 | 3 | THLPTDLLPKSFWENNC[330]K            | 1 |
|                                                                                                                                                                                                                                                                            |      |       |      |      |   |   | 2 | RGFITEKVPM[147]LEM[147]TLPGLR      | 1 |
| STAB2_HUMAN (Q8WWQ8) Stabilin-2 precursor (FEEL-2 protein) (Fasciclin EGF-like laminin-type EGF-like and link domain-containing scavenger receptor 1) (FAS1 EGF-like and X-link domain-containing adhesion molecule 2) (Hyaluronan receptor for endocytosis) [MASS=277027] | *    | 1.25  | *    | *    | * | 2 | 3 | SDNPC[330]HRNANC[339]TTVAPGR       | 1 |
|                                                                                                                                                                                                                                                                            |      |       |      |      |   |   | 2 | TYSLSLPGC[339]RHIC[339]R           | 1 |
| STAG2_HUMAN (Q8N3U4) Cohesin subunit SA-2 (Stromal antigen 2) (SCC3 homolog 2) [MASS=141326]                                                                                                                                                                               | 0.00 | 14.05 | 1.80 | 0.00 | 1 | 9 | 3 | RDPEEDGM[147]M[147]K               | 1 |
|                                                                                                                                                                                                                                                                            |      |       |      |      |   |   | 3 | LMTALVNVALNLSINMDNTQR              | 1 |
|                                                                                                                                                                                                                                                                            |      |       |      |      |   |   | 2 | YYNDYGDIIKETM[147]SK               | 1 |
|                                                                                                                                                                                                                                                                            |      |       |      |      |   |   | 2 | TQLDDRTKITELFAVALPQLLAK            | 1 |
|                                                                                                                                                                                                                                                                            |      |       |      |      |   |   | 2 | YVGWTMHDKQGEVRLK                   | 1 |
|                                                                                                                                                                                                                                                                            |      |       |      |      |   |   | 3 | M[147]NGHHQQNGVENMMLFEVVKMGK       | 1 |
|                                                                                                                                                                                                                                                                            |      |       |      |      |   |   | 3 | ITELFAVALPQLLAKYSVDAEK             | 1 |
|                                                                                                                                                                                                                                                                            |      |       |      |      |   |   | 3 | LIVYTVVEMNTAADIFKQYMKYYNDYGDIIK    | 1 |
|                                                                                                                                                                                                                                                                            |      |       |      |      |   |   | 2 | SSFC[339]JFIGVLVR                  | 1 |
| STAR8_HUMAN (Q92502) StAR-related lipid transfer protein 8 (StARD8) (START domain-containing protein 8) [MASS=112600]                                                                                                                                                      | *    | 2.35  | *    | *    | * | 2 | 2 | ERRDSGVGASLTR                      | 1 |
|                                                                                                                                                                                                                                                                            |      |       |      |      |   |   | 3 | APDGHPLRLWK                        | 1 |
| STEA2_HUMAN (Q8NFT2) Six-transmembrane epithelial antigen of prostate 2 (SixTransMembrane protein of prostate 1) (Prostate cancer-associated protein 1) [MASS=55993]                                                                                                       | 0.00 | 9.59  | 3.39 | 0.00 | 1 | 3 | 3 | QLGLLSFFFAMVHVAYS LC[339]LPM[147]R | 1 |
|                                                                                                                                                                                                                                                                            |      |       |      |      |   |   | 3 | SLSETC[339]LPNGINGIKDARK           | 1 |
|                                                                                                                                                                                                                                                                            |      |       |      |      |   |   | 1 | KGWEK                              | 1 |
| STK4_HUMAN (Q13043) Serine/threonine-protein kinase 4 (EC 2.7.11.1) (STE20-like kinase MST1) (MST-1) (Mammalian STE20-like protein kinase 1) (Serine/threonine-protein kinase Krs-2) [MASS=55630]                                                                          | 0.00 | 3.08  | 0.75 | 0.00 | 1 | 1 | 2 | EISIMQQC[330]DSPHVVK               | 1 |
| STRN3_HUMAN (Q13033) Striatin-3 (Cell-cycle autoantigen SG2NA) (S/G2 antigen) [MASS=87133]                                                                                                                                                                                 | 0.00 | 1.63  | 0.31 | 0.00 | 1 | 1 | 2 | NQLLSC[330]SADGTVR                 | 1 |
| STRN_HUMAN (O43815) Striatin [MASS=86144]                                                                                                                                                                                                                                  | 0.00 | 3.72  | 0.66 | 0.00 | 1 | 2 | 2 | KALPDSGEDR                         | 1 |
|                                                                                                                                                                                                                                                                            |      |       |      |      |   |   | 2 | EDQC[330]LM[147]PEAWNVDQGVIK       | 1 |

|                                                                                                                                                                                                                                                 |      |       |      |      |   |   |   |                                                      |   |
|-------------------------------------------------------------------------------------------------------------------------------------------------------------------------------------------------------------------------------------------------|------|-------|------|------|---|---|---|------------------------------------------------------|---|
| STS2_HUMAN (P57075) Suppressor of T-cell receptor signaling 2 (STS-2) (Cbl-interacting protein 4) (CLIP4) (T-cell ubiquitin ligand) (TULA) [MASS=74122]                                                                                         | 0.00 | 1.82  | 1.49 | 0.00 | 1 | 1 | 3 | AWLQQC[339]STPDGK                                    | 1 |
| STS_HUMAN (P08842) Steryl-sulfatase precursor (EC 3.1.6.2) (Steroid sulfatase) (Steryl-sulfate sulfohydrolase) (Arylsulfatase C) (ASC) [MASS=65492]                                                                                             | 0.66 | 2.57  | 0.52 | 0.00 | 1 | 1 | 2 | DC[330]KPGEGSVFTTGFK                                 | 1 |
| STX11_HUMAN (O75558) Syntaxin-11 [MASS=33196]                                                                                                                                                                                                   | *    | 5.92  | *    | *    | * | 1 | 2 | AMHDYNQAEM[147]KQRDNC[339]K                          | 1 |
|                                                                                                                                                                                                                                                 |      |       |      |      |   |   | 2 | YSTHLHLAEDC[330]M[147]K                              | 2 |
|                                                                                                                                                                                                                                                 |      |       |      |      |   |   | 2 | VEQDLAMGTDAEGEK                                      | 1 |
|                                                                                                                                                                                                                                                 |      |       |      |      |   |   | 3 | YSTHLHLAEDC[330]M[147]K                              | 1 |
| STXB1_HUMAN (P61764) Syntaxin-binding protein 1 (Unc-18 homolog) (Unc-18A) (Unc-18-1) (N-Sec1) (p67) [MASS=67568]                                                                                                                               | 1.00 | 9.76  | 0.52 | 0.17 | 7 | 4 | 2 | YSTHLHLAEDC[330]MK                                   | 1 |
|                                                                                                                                                                                                                                                 |      |       |      |      |   |   | 2 | YSTHLHLAEDC[339]M[147]K                              | 2 |
|                                                                                                                                                                                                                                                 |      |       |      |      |   |   | 2 | HYQGTVDKLC[330]R                                     | 1 |
|                                                                                                                                                                                                                                                 |      |       |      |      |   |   | 2 | M[147]TDIM[147]TEGITIVEDINKRR                        | 1 |
| SUCA_HUMAN (P53597) Succinyl-CoA ligase [GDP-forming] alpha-chain, mitochondrial precursor (EC 6.2.1.4) (Succinyl-CoA synthetase, alpha chain) (SCS-alpha) [MASS=35047]                                                                         | 0.47 | 15.62 | 1.48 | 0.00 | 1 | 3 | 2 | LIGPNC[339]PGVINPGEC[339]K                           | 1 |
|                                                                                                                                                                                                                                                 |      |       |      |      |   |   | 3 | LIGPNC[330]PGVINPGEC[339]KIGIM[147]PGHIHK            | 1 |
|                                                                                                                                                                                                                                                 |      |       |      |      |   |   | 2 | IGIMPGHIHK                                           | 1 |
| SUCB1_HUMAN (Q9P2R7) Succinyl-CoA ligase [ADP-forming] beta-chain, mitochondrial precursor (EC 6.2.1.5) (Succinyl-CoA synthetase, betaA chain) (SCS-betaA) (ATP-specific succinyl-CoA synthetase subunit beta) (NY-REN-39 antigen) [MASS=50317] | 0.95 | 15.55 | 3.12 | 0.00 | 1 | 3 | 2 | MAASM[147]FYGR                                       | 1 |
|                                                                                                                                                                                                                                                 |      |       |      |      |   |   | 3 | LHGGTPANFLDVGGGATVHQQVTEAFKLITSDKK                   | 1 |
|                                                                                                                                                                                                                                                 |      |       |      |      |   |   | 3 | ANLNYIGLDGNIGC[330]LVNGAGLAM[147]ATM[147]DIIK        | 1 |
| SURF4_HUMAN (O15260) Surfeit locus protein 4 [MASS=30394]                                                                                                                                                                                       | *    | 8.18  | *    | *    | * | 1 | 3 | LC[330]LISTFLEDGIRM[147]WFQWSEQR                     | 1 |
| SV2A_HUMAN (Q7L0J3) Synaptic vesicle glycoprotein 2A [MASS=82695]                                                                                                                                                                               | *    | 4.45  | *    | *    | * | 1 | 3 | DM[147]C[330]LSDSNKGMLGLIVYLG M[147]M[147]VGAFWGLADR | 1 |



|                                                                                                                                                                                                                   |      |       |      |      |   |   |   |                                             |   |
|-------------------------------------------------------------------------------------------------------------------------------------------------------------------------------------------------------------------|------|-------|------|------|---|---|---|---------------------------------------------|---|
|                                                                                                                                                                                                                   |      |       |      |      |   |   | 3 | SPVEMDEDVDFVDPYAPKLTSSVAEHK                 | 1 |
|                                                                                                                                                                                                                   |      |       |      |      |   |   | 3 | SQAWQPLVEGSENKGLREYGETESK                   | 1 |
|                                                                                                                                                                                                                   |      |       |      |      |   |   | 2 | REEEENVQSEWRLYC[339]VR                      | 1 |
|                                                                                                                                                                                                                   |      |       |      |      |   |   | 3 | VQASKNPLKM[147]LAAR                         | 6 |
| SVIL_HUMAN (O95425) Supervillin (Archvillin) (p205/p250) [MASS=247705]                                                                                                                                            | 0.00 | 4.70  | 1.22 | 0.00 | 1 | 5 |   |                                             |   |
|                                                                                                                                                                                                                   |      |       |      |      |   |   | 2 | SRVERSAEGPGLPTGVER                          | 1 |
| SYA_HUMAN (P49588) Alanyl-tRNA synthetase (EC 6.1.1.7) (Alanine--tRNA ligase) (AlaRS) (NY-REN-42 antigen) [MASS=106801]                                                                                           | *    | 3.00  | *    | *    | * | 2 | 3 | MHSPQTSAM[147]LFTVDNEAGK                    | 1 |
|                                                                                                                                                                                                                   |      |       |      |      |   |   | 2 | GLEVTDDSPK                                  | 1 |
| SYEP_HUMAN (P07814) Bifunctional aminoacyl-tRNA synthetase [Includes: Glutamyl-tRNA synthetase (EC 6.1.1.17) (Glutamate--tRNA ligase); Prolyl-tRNA synthetase (EC 6.1.1.15) (Proline--tRNA ligase)] [MASS=163025] | 1.00 | 11.04 | 1.47 | 0.00 | 1 | 7 | 3 | ASEDLKTHM[147]VVANTMEDFQKILDSGK             | 1 |
|                                                                                                                                                                                                                   |      |       |      |      |   |   | 3 | VFIEGADAETFSEGEMVTFINWGNLNITKIHK            | 1 |
|                                                                                                                                                                                                                   |      |       |      |      |   |   | 3 | EAPC[330]VLIYIPDGHTKEMPTSGSK                | 1 |
|                                                                                                                                                                                                                   |      |       |      |      |   |   | 3 | MFEIVFEDPKIPGEKQFAYQNSWGLTTR                | 1 |
|                                                                                                                                                                                                                   |      |       |      |      |   |   | 3 | NQGGGLSSSGGEGQGPK                           | 1 |
|                                                                                                                                                                                                                   |      |       |      |      |   |   | 3 | YNVYPTYDFAC[339]PIVDSIEGVTHALR              | 1 |
|                                                                                                                                                                                                                   |      |       |      |      |   |   | 2 | SLC[339]IPFK                                | 1 |
| SYFB_HUMAN (Q9NSD9) Phenylalanyl-tRNA synthetase beta chain (EC 6.1.1.20) (Phenylalanine--tRNA ligase beta chain) (PheRS) [MASS=66129]                                                                            | 1.00 | 10.19 | 1.19 | 0.23 | 2 | 4 | 2 | LHQNIC[339]R                                | 1 |
|                                                                                                                                                                                                                   |      |       |      |      |   |   | 2 | TIAANRKM[147]PLPLK                          | 1 |
|                                                                                                                                                                                                                   |      |       |      |      |   |   | 2 | VMPDGKIQK                                   | 1 |
|                                                                                                                                                                                                                   |      |       |      |      |   |   | 3 | IVLDIIVTMFSEYC[330]ENQFTVEAAEVVFPNGK        | 1 |
| SYGP1_HUMAN (Q96PV0) Ras GTPase-activating protein SynGAP (Synaptic Ras-GTPase-activating protein 1) (Synaptic Ras-GAP 1) (Neuronal RasGAP) [MASS=146675]                                                         | 0.97 | 6.17  | 1.04 | 0.00 | 1 | 4 | 1 | GLNSSMDM[147]AR                             | 1 |
|                                                                                                                                                                                                                   |      |       |      |      |   |   | 3 | PQPVVLRGPSAEMQGYMM[147]RDLNSSIDLQSFM[147]AR | 1 |
|                                                                                                                                                                                                                   |      |       |      |      |   |   | 2 | VVNSHC[330]VFPR                             | 1 |
|                                                                                                                                                                                                                   |      |       |      |      |   |   | 3 | PGWNPRFC[330]IISGNQLLMLDEDEIHPLLIR          | 1 |
| SYHH_HUMAN (P49590) Histidyl-tRNA synthetase homolog (EC 6.1.1.21) (Histidine--tRNA ligase homolog) (HisRS) [MASS=56888]                                                                                          | 0.00 | 14.43 | 1.09 | 0.00 | 1 | 3 | 2 | GM[147]DTPAFELKETLTEKYGEDSGLMYDLK           | 1 |
|                                                                                                                                                                                                                   |      |       |      |      |   |   | 3 | LLTQLHYC[339]ESTGIPLVVIIGEQLKEGVK           | 1 |
|                                                                                                                                                                                                                   |      |       |      |      |   |   | 2 | YDLTVPFARYLAMNK                             | 1 |
| SYM_HUMAN (P56192) Methionyl-tRNA synthetase (EC 6.1.1.10) (Methionine--tRNA ligase) (MetRS) [MASS=101115]                                                                                                        | *    | 4.78  | *    | *    | * | 2 | 3 | PQQIQALMDEVTKQGNIVR                         | 1 |
|                                                                                                                                                                                                                   |      |       |      |      |   |   | 3 | ITQDIFQQLLKRGFVLQDTVEQLR                    | 1 |

|                                                                                                                                                                                                   |      |      |      |      |   |    |   |                                      |   |
|---------------------------------------------------------------------------------------------------------------------------------------------------------------------------------------------------|------|------|------|------|---|----|---|--------------------------------------|---|
| SYNE1_HUMAN (Q8NF91) Nesprin-1 (Nuclear envelope spectrin repeat protein 1) (Synaptic nuclear envelope protein 1) (Syne-1) (Myocyte nuclear envelope protein 1) (Myne-1) (Enaptin) [MASS=1011035] | *    | 1.74 | *    | *    | * | 10 | 3 | AFQQEISLNHNK                         | 1 |
|                                                                                                                                                                                                   |      |      |      |      |   |    | 2 | ELFMEVKQYQAQADEMDR                   | 1 |
|                                                                                                                                                                                                   |      |      |      |      |   |    | 3 | QADIVTFPEINLMNESSELHTQLAK            | 1 |
|                                                                                                                                                                                                   |      |      |      |      |   |    | 2 | HSELELNIAQNM[147]VSQVK               | 1 |
|                                                                                                                                                                                                   |      |      |      |      |   |    | 3 | HFSESMQEFQEWFLGAK                    | 1 |
|                                                                                                                                                                                                   |      |      |      |      |   |    | 3 | LLDPEDVDVDK                          | 1 |
|                                                                                                                                                                                                   |      |      |      |      |   |    | 2 | TAAFSSSGVIYTVAKEELK                  | 1 |
|                                                                                                                                                                                                   |      |      |      |      |   |    | 2 | QWQRYREM[147]AEK                     | 1 |
|                                                                                                                                                                                                   |      |      |      |      |   |    | 2 | DKTTMLGK                             | 1 |
|                                                                                                                                                                                                   |      |      |      |      |   |    | 3 | GQM[147]LKFSSM[147]APDLDR            | 1 |
| SYPH_HUMAN (P08247) Synaptophysin (Major synaptic vesicle protein p38) [MASS=33845]                                                                                                               | 1.00 | 5.75 | 0.57 | 0.14 | 7 | 2  | 2 | LHQVYFDAPTC[339]R                    | 2 |
|                                                                                                                                                                                                   |      |      |      |      |   |    | 3 | LHQVYFDAPTC[330]R                    | 1 |
|                                                                                                                                                                                                   |      |      |      |      |   |    | 1 | LHQVYFDAPTC[339]R                    | 1 |
| SYT11_HUMAN (Q9BT88) Synaptotagmin-11 (Synaptotagmin XI) (SytXI) [MASS=48306]                                                                                                                     | 0.00 | 3.25 | 0.73 | 0.00 | 1 | 1  | 2 | LHQVYFDAPTC[330]R                    | 2 |
|                                                                                                                                                                                                   |      |      |      |      |   |    | 2 | EM[147]PVC[330]R                     | 1 |
| SYT1_HUMAN (P21579) Synaptotagmin-1 (Synaptotagmin I) (SytI) (p65) [MASS=47573]                                                                                                                   | *    | 2.61 | *    | *    | * | 1  | 2 | GPSSGSC[330]IDQLPIK                  | 1 |
| SYT7_HUMAN (O43581) Synaptotagmin-7 (Synaptotagmin VII) (SytVII) [MASS=45567]                                                                                                                     | 0.27 | 9.95 | 0.55 | 0.00 | 1 | 3  | 3 | FSKHDIIGFEK                          | 1 |
|                                                                                                                                                                                                   |      |      |      |      |   |    | 2 | NLKAM[147]DIGGTSDPYVK                | 1 |
|                                                                                                                                                                                                   |      |      |      |      |   |    | 2 | NDVIGKIYLSWK                         | 1 |
| SYV_HUMAN (P26640) Valyl-tRNA synthetase (EC 6.1.1.9) (Valine--tRNA ligase) (ValRS) (Protein G7a) [MASS=140475]                                                                                   | *    | 1.27 | *    | *    | * | 1  | 3 | DLKPC[330]SDGSGSR                    | 1 |
|                                                                                                                                                                                                   |      |      |      |      |   |    | 3 | DPGVITYDLPTPPGEK                     | 1 |
| TAAR8_HUMAN (Q969N4) Trace amine-associated receptor 8 (Trace amine receptor 5) (TaR-5) (G-protein coupled receptor 102) [MASS=38029]                                                             | 0.40 | 9.06 | 0.88 | 0.00 | 1 | 1  | 3 | QLHSPTNFLIASLAC[330]ADFLVGVTVMLFSMVR | 1 |
| TAB3_HUMAN (Q8N5C8) Mitogen-activated protein kinase kinase kinase 7-interacting protein 3 (TAK1-binding protein 3) (NF-kappa-B-activating protein 1) [MASS=78652]                                | *    | 2.53 | *    | *    | * | 1  | 3 | NQHSLYTATTPSSSPSR                    | 1 |
| TAD2L_HUMAN (O75478) Transcriptional adapter 2-like (ADA2-like protein) [MASS=51496]                                                                                                              | 0.00 | 5.42 | 2.03 | 0.00 | 1 | 1  | 3 | LVPGAYLEYKSALLNEC[339]NKQGGLR        | 1 |

|                                                                                                                                                                                                                                              |      |       |      |      |   |   |   |                                           |   |
|----------------------------------------------------------------------------------------------------------------------------------------------------------------------------------------------------------------------------------------------|------|-------|------|------|---|---|---|-------------------------------------------|---|
| TAF3_HUMAN (Q5VWG9) Transcription initiation factor TFIID subunit 3 (TBP-associated factor 3) (Transcription initiation factor TFIID 140 kDa subunit) (140 kDa TATA box-binding protein-associated factor) (TAF140) (TAFII140) [MASS=103581] | *    | 4.74  | *    | *    | * | 2 | 3 | LLSTKGDTLDVVLEAREPLSSINTQK                | 1 |
|                                                                                                                                                                                                                                              |      |       |      |      |   |   | 2 | SQM[147]PTAKPLETKSFTPK                    | 1 |
| TATD2_HUMAN (Q93075) TatD DNase domain-containing deoxyribonuclease 2 (EC 3.1.21.-) [MASS=85039]                                                                                                                                             | *    | 2.63  | *    | *    | * | 1 | 2 | LRDQGSTMIYLKAIQGILGK                      | 1 |
| TAU_HUMAN (P10636) Microtubule-associated protein tau (Neurofibrillary tangle protein) (Paired helical filament-tau) (PHF-tau) [MASS=78746]                                                                                                  | *    | 7.13  | *    | *    | * | 3 | 2 | TDHGAEIVYKSPVVSAGDTSPR                    | 1 |
|                                                                                                                                                                                                                                              |      |       |      |      |   |   | 2 | QEFQVM[147]EDHAGTYGLGDR                   | 1 |
|                                                                                                                                                                                                                                              |      |       |      |      |   |   | 3 | VAVVRTPPKSPSSAK                           | 1 |
|                                                                                                                                                                                                                                              |      |       |      |      |   |   | 2 | AYHEQLSVAEITNAC[330]FEPANQM[147]VK        | 2 |
|                                                                                                                                                                                                                                              |      |       |      |      |   |   | 2 | YMAC[339]C[339]LLYR                       | 1 |
|                                                                                                                                                                                                                                              |      |       |      |      |   |   | 3 | LSDQC[330]TGLQGFLVFHSGGGTSGGFTSLLMER      | 1 |
|                                                                                                                                                                                                                                              |      |       |      |      |   |   | 2 | YM[147]AC[339]C[339]LLYR                  | 3 |
| TBA1_HUMAN (P68366) Tubulin alpha-1 chain (Alpha-tubulin 1) (Testis-specific alpha-tubulin) (Tubulin H2-alpha) [MASS=49924]                                                                                                                  | 1.00 | 14.51 | 0.82 | 0.06 | 5 | 3 | 2 | AYHEQLSVAEITNAC[330]FEPANQMVK             | 1 |
|                                                                                                                                                                                                                                              |      |       |      |      |   |   | 3 | AYHEQLSVAEITNAC[330]FEPANQM[147]VK        | 2 |
|                                                                                                                                                                                                                                              |      |       |      |      |   |   | 2 | YM[147]AC[330]C[330]LLYR                  | 2 |
|                                                                                                                                                                                                                                              |      |       |      |      |   |   | 3 | LSDQC[330]TGLQGFLVFHSGGGTSGGFTSLLM[147]ER | 4 |
| TBA2_HUMAN (Q13748) Tubulin alpha-2 chain (Alpha-tubulin 2) [MASS=49959]                                                                                                                                                                     | 1.00 | 4.00  | *    | *    | * | 1 | 3 | GDVVPKDVNAAIATIKTK                        | 1 |
|                                                                                                                                                                                                                                              |      |       |      |      |   |   | 3 | LADQC[330]TGLQGFLVFHSGGGTSGGFTSLLMER      | 3 |
| TBA3_HUMAN (Q71U36) Tubulin alpha-3 chain (Alpha-tubulin 3) (Tubulin B-alpha-1) [MASS=50135]                                                                                                                                                 | 1.00 | 7.10  | 1.02 | 0.06 | 8 | 1 | 3 | LADQC[339]TGLQGFLVFHSGGGTSGGFTSLLM[147]ER | 4 |
|                                                                                                                                                                                                                                              |      |       |      |      |   |   | 3 | LADQC[330]TGLQGFLVFHSGGGTSGGFTSLLM[147]ER | 2 |

|                                                                                                                                |      |       |      |      |   |    |   |   |                                                  |   |
|--------------------------------------------------------------------------------------------------------------------------------|------|-------|------|------|---|----|---|---|--------------------------------------------------|---|
|                                                                                                                                |      |       |      |      |   |    |   | 3 | LTTPTYGDLNHLVSATM[147]SGVTTC[330]LR              | 1 |
|                                                                                                                                |      |       |      |      |   |    |   | 2 | NM[147]MAAC[330]DPR                              | 1 |
|                                                                                                                                |      |       |      |      |   |    |   | 2 | LTTPTYGDLNHLVSATMSGVTTC[330]LR                   | 1 |
|                                                                                                                                |      |       |      |      |   |    |   | 3 | KEAESC[339]DC[339]LQGFQLTHSLGGGTGSGMGTLISK       | 1 |
|                                                                                                                                |      |       |      |      |   |    |   | 2 | NMM[147]AAC[330]DPR                              | 1 |
|                                                                                                                                |      |       |      |      |   |    |   | 2 | LTTPTYGDLNHLVSATM[147]SGVTTC[330]LR              | 2 |
|                                                                                                                                |      |       |      |      |   |    |   | 2 | NM[147]M[147]AAC[330]DPR                         | 4 |
|                                                                                                                                |      |       |      |      |   |    |   | 2 | NMM[147]AAC[339]DPR                              | 1 |
| TBB2C_HUMAN (P68371) Tubulin beta-2C chain (Tubulin beta-2 chain) [MASS=49831]                                                 | 1.00 | 24.27 | *    | *    | * |    | 5 | 2 | TAVC[330]DIPPR                                   | 3 |
|                                                                                                                                |      |       |      |      |   |    |   | 3 | EAESC[339]DC[330]LQGFQLTHSLGGGTGSGM[147]GTLLISK  | 1 |
|                                                                                                                                |      |       |      |      |   |    |   | 3 | LTTPTYGDLNHLVSATM[147]SGVTTC[339]LR              | 2 |
|                                                                                                                                |      |       |      |      |   |    |   | 2 | TAVC[339]DIPPR                                   | 3 |
|                                                                                                                                |      |       |      |      |   |    |   | 2 | NM[147]M[147]AAC[339]DPR                         | 3 |
|                                                                                                                                |      |       |      |      |   |    |   | 3 | KEAESC[339]DC[339]LQGFQLTHSLGGGTGSGM[147]GTLLISK | 2 |
|                                                                                                                                |      |       |      |      |   |    |   | 2 | EIVHIQAGQC[339]GNQIGAK                           | 3 |
|                                                                                                                                |      |       |      |      |   |    |   | 2 | EIVHIQAGQC[330]GNQIGAK                           | 4 |
| TBB2_HUMAN (P07437) Tubulin beta-2 chain [MASS=49671]                                                                          | 1.00 | 8.11  | 0.86 | 0.19 |   | 35 | 2 |   |                                                  |   |
|                                                                                                                                |      |       |      |      |   |    |   | 3 | EIVHIQAGQC[339]GNQIGAK                           | 1 |
|                                                                                                                                |      |       |      |      |   |    |   | 3 | M[147]REIVHIQAGQC[330]GNQIGAK                    | 1 |
|                                                                                                                                |      |       |      |      |   |    |   | 3 | EIVHIQAGQC[330]GNQIGAK                           | 1 |
|                                                                                                                                |      |       |      |      |   |    |   | 2 | MREIVHIQAGQC[330]GNQIGAK                         | 1 |
| TBCD2_HUMAN (Q9BYX2) TBC1 domain family member 2 (Prostate antigen recognized and identified by SEREX) (PARIS-1) [MASS=104165] | *    | 1.85  | *    | *    | * |    | 1 | 3 | AKRQNNTFPFFSEGITR                                | 1 |

|                                                                                                                                                                       |      |      |      |      |   |   |   |                                           |   |
|-----------------------------------------------------------------------------------------------------------------------------------------------------------------------|------|------|------|------|---|---|---|-------------------------------------------|---|
| TBCD4_HUMAN (O60343) TBC1 domain family member 4 (Akt substrate of 160 kDa) (AS160) [MASS=146562]                                                                     | 0.00 | 4.01 | 1.10 | 0.00 | 1 | 3 | 3 | C[339]SSVTGVQRR                           | 1 |
|                                                                                                                                                                       |      |      |      |      |   |   | 3 | LWYVGGSC[339]LDHRTTLPMLPWLM[147]AEIRR     | 1 |
|                                                                                                                                                                       |      |      |      |      |   |   | 3 | ATDPSQVPDVISSIR                           | 1 |
| TBCD5_HUMAN (Q92609) TBC1 domain family member 5 [MASS=89004]                                                                                                         | 0.00 | 1.51 | 1.01 | 0.00 | 1 | 1 | 2 | QASSETPGC[330]TDR                         | 1 |
| TBCD8_HUMAN (O95759) TBC1 domain family member 8 (Vascular Rab-GAP/TBC-containing protein) (AD 3) [MASS=102676]                                                       | *    | 1.34 | *    | *    | * | 1 | 2 | EHMM[147]SC[330]YWEQPR                    | 1 |
| TCF20_HUMAN (Q9UGU0) Transcription factor 20 (Stromelysin 1 PDGF-responsive element-binding protein) (SPRE-binding protein) (Nuclear factor SPBP) (AR1) [MASS=211770] | 0.00 | 6.43 | 0.26 | 0.00 | 1 | 5 | 3 | HKSASNGSKTDTEEEEEQQQQK                    | 1 |
|                                                                                                                                                                       |      |      |      |      |   |   | 3 | ILQLM[147]PQLSPTSPMMPSPNSHAAGFKGFGLEGVPEK | 1 |
|                                                                                                                                                                       |      |      |      |      |   |   | 2 | RHRSEDC[339]GGGPR                         | 1 |
|                                                                                                                                                                       |      |      |      |      |   |   | 2 | KQQQPPPPPPQPPQIPEGSADGEPK                 | 1 |
|                                                                                                                                                                       |      |      |      |      |   |   | 3 | FEIEPQSSAHEPGGSLERRSVIC[330]DISPLR        | 1 |
| TCGAP_HUMAN (O14559) TC10/CDC42 GTPase-activating protein (Sorting nexin-26) [MASS=137212]                                                                            | 0.25 | 2.41 | 0.88 | 0.00 | 1 | 2 | 3 | C[330]IFDRRFSC[330]LPELPPPPEGAR           | 1 |
|                                                                                                                                                                       |      |      |      |      |   |   | 2 | SLAGSC[330]PSTR                           | 1 |
| TCPH_HUMAN (Q99832) T-complex protein 1 subunit eta (TCP-1-eta) (CCT-eta) (HIV-1 Nef-interacting protein) [MASS=59366]                                                | 0.72 | 8.66 | 1.74 | 0.19 | 2 | 2 | 2 | INALTAASEAAC[339]LIVSVDETIK               | 1 |
|                                                                                                                                                                       |      |      |      |      |   |   | 3 | INALTAASEAAC[330]LIVSVDETIKNPR            | 1 |
| TCPQ_HUMAN (P50990) T-complex protein 1 subunit theta (TCP-1-theta) (CCT-theta) (NY-REN-15 antigen) [MASS=59489]                                                      | *    | 3.47 | *    | *    | * | 1 | 2 | VDQIIM[147]AKPAGGPKPPSGK                  | 1 |
| TDG_HUMAN (Q13569) G/T mismatch-specific thymine DNA glycosylase (EC 3.2.2.-) [MASS=46053]                                                                            | 0.59 | 5.61 | 0.65 | 0.00 | 1 | 1 | 2 | C[330]LFMSGLSEVQLNHMDDHTLPGK              | 1 |
| TDRD6_HUMAN (O60522) Tudor domain-containing protein 6 (Aantigen NY-CO-45) (Fragment) [MASS=85665]                                                                    | *    | 1.99 | *    | *    | * | 1 | 2 | NRDAISALMPFSLRK                           | 1 |
| TDRKH_HUMAN (Q9Y2W6) Tudor and KH domain-containing protein [MASS=67024]                                                                                              | 0.00 | 2.15 | 1.18 | 0.00 | 1 | 1 | 2 | VLLISGFVPQVC[339]K                        | 1 |
| TENR_HUMAN (Q92752) Tenascin-R precursor (TN-R) (Restrictin) (Janusin) [MASS=149547]                                                                                  | 0.00 | 1.40 | 0.57 | 0.00 | 1 | 2 | 2 | ITSQGRYELR                                | 1 |
|                                                                                                                                                                       |      |      |      |      |   |   | 2 | QC[330]LNAC[330]SGR                       | 1 |

|                                                                                                                                                            |      |       |      |      |   |   |   |                                          |   |
|------------------------------------------------------------------------------------------------------------------------------------------------------------|------|-------|------|------|---|---|---|------------------------------------------|---|
|                                                                                                                                                            |      |       |      |      |   |   | 2 | TVLVYLTDANADR                            | 1 |
|                                                                                                                                                            |      |       |      |      |   |   | 2 | NQALPFPSNITLM[147]R                      | 1 |
|                                                                                                                                                            |      |       |      |      |   |   | 1 | VGISSR                                   | 6 |
| TEP1_HUMAN (Q99973) Telomerase protein component 1 (Telomerase-associated protein 1) (Telomerase protein 1) (p240) (p80 telomerase homolog) [MASS=290413]  | *    | 4.00  | *    | *    | * | 6 |   |                                          |   |
|                                                                                                                                                            |      |       |      |      |   |   | 3 | LHGHVSAHPDILSLENRC[339]LAM[147]LPDLQPLEK | 1 |
|                                                                                                                                                            |      |       |      |      |   |   | 3 | EPGALPSTYRSLVWELQQRLLPK                  | 1 |
|                                                                                                                                                            |      |       |      |      |   |   | 3 | FIAEHGASHLLEHVGM[147]DK                  | 1 |
| TESK2_HUMAN (Q96S53) Dual specificity testis-specific protein kinase 2 (EC 2.7.12.1) (Testicular protein kinase 2) [MASS=63639]                            | *    | 3.85  | *    | *    | * | 1 | 2 | ASGQVMALKMNTLSSNRANM[147]LK              | 1 |
|                                                                                                                                                            |      |       |      |      |   |   | 3 | SM[147]TEGSTVNTEYKNQKNQISEESC[339]LNEK   | 1 |
| TEX15_HUMAN (Q9BXT5) Testis-expressed sequence 15 protein [MASS=315360]                                                                                    | *    | 2.47  | *    | *    | * | 4 | 1 | MAHIR                                    | 1 |
|                                                                                                                                                            |      |       |      |      |   |   | 3 | ATFKHPRTTGSHPK                           | 1 |
|                                                                                                                                                            |      |       |      |      |   |   | 3 | NYHNIEILSSEEFSTKFNLIC[339]R              | 1 |
| TEX9_HUMAN (Q8N6V9) Testis-expressed sequence 9 protein [MASS=44826]                                                                                       | *    | 5.88  | *    | *    | * | 2 | 3 | QAASSQSATEVRLNR                          | 1 |
|                                                                                                                                                            |      |       |      |      |   |   | 1 | GELM[147]JGFK                            | 1 |
| TF7L1_HUMAN (Q9HCS4) Transcription factor 7-like 1 (HMG box transcription factor 3) (TCF-3) [MASS=62630]                                                   | *    | 3.40  | *    | *    | * | 1 | 2 | VVAEC[339]TLKESAAINQILGRK                | 1 |
| TF7L2_HUMAN (Q9NQB0) Transcription factor 7-like 2 (HMG box transcription factor 4) (T-cell-specific transcription factor 4) (TCF-4) (hTCF-4) [MASS=67918] | *    | 4.52  | *    | *    | * | 2 | 1 | RQDGGLFK                                 | 1 |
|                                                                                                                                                            |      |       |      |      |   |   | 3 | QESSQSDVGSLSHSSKHQDSK                    | 1 |
| TGT_HUMAN (Q9BXR0) Queuine tRNA-ribosyltransferase (EC 2.4.2.29) (tRNA-guanine transglycosylase) (Guanine insertion enzyme) [MASS=42492]                   | 0.00 | 3.36  | 2.55 | 0.00 | 1 | 1 | 3 | GITTEQLDALGC[339]R                       | 3 |
| THAP7_HUMAN (Q9BT49) THAP domain-containing protein 7 [MASS=34440]                                                                                         | 0.00 | 6.80  | 0.32 | 0.00 | 1 | 1 | 3 | LDPSGQGLWDPASEYIYFC[330]SK               | 1 |
|                                                                                                                                                            |      |       |      |      |   |   | 2 | MASGLEFKSVADSVLFLR                       | 1 |
| THAS_HUMAN (P24557) Thromboxane-A synthase (EC 5.3.99.5) (TXA synthase) (TXS) (Cytochrome P450 5A1) [MASS=60544]                                           | 0.00 | 20.45 | 0.17 | 0.00 | 1 | 5 | 3 | HSASPM[147]GVQDFDIVRDFVSSSTGC[339]K      | 1 |
|                                                                                                                                                            |      |       |      |      |   |   | 3 | QVLVENFSNFTNR                            | 1 |
|                                                                                                                                                            |      |       |      |      |   |   | 3 | HM[147]APEFC[339]SLEEGLPYLDMVIAETLR      | 1 |
|                                                                                                                                                            |      |       |      |      |   |   | 3 | MEALGFLKLEVNGPM[147]VTVALSVALLALLK       | 1 |

|                                                                                                                                                                                  |      |       |      |      |   |   |   |                                                      |   |
|----------------------------------------------------------------------------------------------------------------------------------------------------------------------------------|------|-------|------|------|---|---|---|------------------------------------------------------|---|
| THIL_HUMAN (P24752) Acetyl-CoA acetyltransferase, mitochondrial precursor (EC 2.3.1.9) (Acetoacetyl-CoA thiolase) (T2) [MASS=45199]                                              | 1.00 | 4.92  | 1.67 | 0.00 | 3 | 2 | 2 | IHM[147]GSC[339]AENTAK                               | 1 |
|                                                                                                                                                                                  |      |       |      |      |   |   | 2 | IHM[147]GSC[339]AENTAK                               | 1 |
|                                                                                                                                                                                  |      |       |      |      |   |   | 2 | IHM[147]GSC[330]AENTAK                               | 1 |
|                                                                                                                                                                                  |      |       |      |      |   |   | 2 | EVVIVSATR                                            | 1 |
| THY1_HUMAN (P04216) Thy-1 membrane glycoprotein precursor (Thy-1 antigen) (CD90 antigen) (CDw90 antigen) [MASS=17935]                                                            | 0.99 | 18.63 | 0.48 | 0.13 | 2 | 2 | 3 | KHVLFGTVGVPEHTYR                                     | 1 |
|                                                                                                                                                                                  |      |       |      |      |   |   | 2 | VTSLTAC[330]LVDQSLR                                  | 2 |
| TIM10_HUMAN (P62072) Mitochondrial import inner membrane translocase subunit Tim10 [MASS=10333]                                                                                  | 0.50 | 7.78  | 1.13 | 0.00 | 1 | 1 | 2 | MTSAC[339]JHR                                        | 1 |
| TIM9_HUMAN (Q9Y5J7) Mitochondrial import inner membrane translocase subunit Tim9 [MASS=10378]                                                                                    | 0.00 | 17.98 | 1.51 | 0.00 | 1 | 1 | 3 | EVKPEETTC[330]SEHC[330]LQK                           | 1 |
| TKT_HUMAN (P29401) Transketolase (EC 2.2.1.1) (TK) [MASS=67877]                                                                                                                  | *    | 6.90  | *    | *    | * | 2 | 3 | RC[339]EAFGWHAIIVDGHVSVEELC[330]K                    | 1 |
|                                                                                                                                                                                  |      |       |      |      |   |   | 2 | C[339]EAFGWHAIIVDGHVSVEELC[330]K                     | 1 |
|                                                                                                                                                                                  |      |       |      |      |   |   | 2 | M[147]VALSLKIC[339]VRHC[330]NVVK                     | 1 |
|                                                                                                                                                                                  |      |       |      |      |   |   | 2 | LLAALM[147]DDEVGSGEDLLR                              | 1 |
| TLN2_HUMAN (Q9Y4G6) Talin-2 [MASS=271553]                                                                                                                                        | *    | 4.41  | *    | *    | * | 5 | 3 | DVAKALSDLISATKGAASK                                  | 1 |
|                                                                                                                                                                                  |      |       |      |      |   |   | 3 | SASAAQRELV AQGKVGSI PANAAADDGQWSQGLISAAR             | 1 |
|                                                                                                                                                                                  |      |       |      |      |   |   | 2 | GVKLLAALM[147]DDEVGSGEDLLR                           | 1 |
| TLR4_HUMAN (O00206) Toll-like receptor 4 precursor (hToll) (CD284 antigen) [MASS=95679]                                                                                          | *    | 2.62  | *    | *    | * | 1 | 2 | MM[147]SASRLAGTLIPAMAFLSC[339]VR                     | 1 |
| TMED9_HUMAN (Q9BVK6) Transmembrane emp24 domain-containing protein 9 precursor (Glycoprotein 25L2) [MASS=25105]                                                                  | 0.34 | 16.36 | 2.71 | 0.15 | 2 | 2 | 3 | EEYQPATPGLGMFVEVK                                    | 1 |
|                                                                                                                                                                                  |      |       |      |      |   |   | 2 | KC[339]FIEEIPDETM[147]VIGNYR                         | 2 |
| TMEM8_HUMAN (Q9HCN3) Transmembrane protein 8 precursor (M83 protein) [MASS=84716]                                                                                                | *    | 3.50  | *    | *    | * | 1 | 3 | GM[147]WNMLGPC[339]LFAFVIMASM[147]WAYRC[339]GHR      | 1 |
|                                                                                                                                                                                  |      |       |      |      |   |   | 3 | GM[147]WNMLGPC[339]LFAFVIM[147]ASM[147]WAYRC[339]GHR | 1 |
| TMM27_HUMAN (Q9HBJ8) Collectrin precursor (Transmembrane protein 27) [MASS=25235]                                                                                                | 0.00 | 14.41 | 0.60 | 0.00 | 1 | 1 | 3 | NKEPSEVDDAEDKC[330]ENM[147]ITIENGIPSDPLDMK           | 1 |
| TMM51_HUMAN (Q9NW97) Transmembrane protein 51 [MASS=27759]                                                                                                                       | 0.00 | 9.88  | 0.65 | 0.00 | 1 | 1 | 3 | TFSVAYVLVAGVM[147]LLLLSIC[339]LSIR                   | 1 |
| TMPS9_HUMAN (Q7Z410) Transmembrane protease, serine 9 (EC 3.4.21.-) (Polyserase-1) (Polyserase-I) (Polyserine protease 1) [Contains: Serase-1; Serase-2; Serase-3] [MASS=114020] | *    | 6.70  | *    | *    | * | 4 | 3 | LKGWILEIMSSQPLPMSPPSTTRMLATTSR                       | 1 |
|                                                                                                                                                                                  |      |       |      |      |   |   | 2 | C[339]VITGWGVSREGGSM[147]AR                          | 1 |
|                                                                                                                                                                                  |      |       |      |      |   |   | 3 | PGVYTRITRLK                                          | 1 |
|                                                                                                                                                                                  |      |       |      |      |   |   | 2 | EDFLVKPEVLQK                                         | 1 |

|                                                                                                                                                                                                                                                           |      |       |      |      |   |   |   |                                             |   |
|-----------------------------------------------------------------------------------------------------------------------------------------------------------------------------------------------------------------------------------------------------------|------|-------|------|------|---|---|---|---------------------------------------------|---|
| TNI3K_HUMAN (Q59H18) Serine/threonine-protein kinase TNNI3K (EC 2.7.11.1) (TNNI3-interacting kinase) (Cardiac ankyrin repeat kinase) [MASS=104178]                                                                                                        | 0.48 | 5.98  | 1.42 | 0.06 | 2 | 3 | 3 | FLQSLDEDNMTKQPGNLR                          | 1 |
|                                                                                                                                                                                                                                                           |      |       |      |      |   |   | 2 | YGYVSDPMSSMHFHSC[339]JR                     | 1 |
|                                                                                                                                                                                                                                                           |      |       |      |      |   |   | 2 | LVQFLLDNGADMNLVAC[339]DPSR                  | 1 |
| TNK1_HUMAN (Q13470) Non-receptor tyrosine protein kinase TNK1 (EC 2.7.10.2) (CD38 negative kinase 1) [MASS=72499]                                                                                                                                         | 0.00 | 11.11 | 0.25 | 0.00 | 1 | 3 | 2 | SLRVGPEGPM[147]GTELGDFLR                    | 1 |
|                                                                                                                                                                                                                                                           |      |       |      |      |   |   | 3 | KIMEM[147]ELSVHGVTHQEC[330]QTALGATGGDVVSAIR | 1 |
|                                                                                                                                                                                                                                                           |      |       |      |      |   |   | 3 | PSFSHLEGLLQEAGPSEAC[330]C[330]VR            | 1 |
| TOM40_HUMAN (O96008) Probable mitochondrial import receptor subunit TOM40 homolog (Translocase of outer membrane 40 kDa subunit homolog) (Haymaker protein) (p38.5) [MASS=37893]                                                                          | *    | 5.54  | *    | *    | * | 1 | 2 | LPPLPLTLALGAFLNHRKNK                        | 1 |
| TOM70_HUMAN (O94826) Mitochondrial precursor proteins import receptor (Translocase of outer membrane TOM70) [MASS=67454]                                                                                                                                  | *    | 0.99  | *    | *    | * | 1 | 2 | C[339]FALYR                                 | 1 |
| TOP3B_HUMAN (O95985) DNA topoisomerase 3-beta-1 (EC 5.99.1.2) (DNA topoisomerase III beta-1) [MASS=96661]                                                                                                                                                 | 0.00 | 2.20  | 0.67 | 0.00 | 1 | 2 | 2 | FM[147]KYIQAK                               | 1 |
|                                                                                                                                                                                                                                                           |      |       |      |      |   |   | 2 | HFIATVSHDC[339]K                            | 1 |
| TP53B_HUMAN (Q12888) Tumor suppressor p53-binding protein 1 (p53-binding protein 1) (p53BP1) (53BP1) [MASS=213573]                                                                                                                                        | 0.00 | 4.77  | 0.40 | 0.00 | 1 | 5 | 3 | MVIQGPSSPQGEAMVTDVLEDQKEGRSTNK              | 1 |
|                                                                                                                                                                                                                                                           |      |       |      |      |   |   | 2 | QDATVQTER                                   | 1 |
|                                                                                                                                                                                                                                                           |      |       |      |      |   |   | 2 | DIALGVFDVVVTDVPC[330]PASVLK                 | 1 |
|                                                                                                                                                                                                                                                           |      |       |      |      |   |   | 3 | RRSNVSSPATPTASSSSSTTPTR                     | 1 |
|                                                                                                                                                                                                                                                           |      |       |      |      |   |   | 2 | TDVGAGALRR                                  | 1 |
| TPA_HUMAN (P00750) Tissue-type plasminogen activator precursor (EC 3.4.21.68) (tPA) (t-PA) (t-plasminogen activator) (Alteplase) (Retelase) [Contains: Tissue-type plasminogen activator chain A; Tissue-type plasminogen activator chain B] [MASS=62917] | 0.00 | 7.65  | 1.64 | 0.00 | 1 | 3 | 2 | AQC[339]HSVPVKSC[339]SEPR                   | 1 |
|                                                                                                                                                                                                                                                           |      |       |      |      |   |   | 3 | LTWEYC[339]DVPSC[339]STC[339]GLR            | 1 |
|                                                                                                                                                                                                                                                           |      |       |      |      |   |   | 3 | RGARSYQVIC[339]R                            | 2 |
| TPP2_HUMAN (P29144) Tripeptidyl-peptidase 2 (EC 3.4.14.10) (Tripeptidyl-peptidase II) (TPP-II) (Tripeptidyl aminopeptidase) [MASS=138218]                                                                                                                 | *    | 3.04  | *    | *    | * | 2 | 1 | KSSNLTLPK                                   | 1 |
|                                                                                                                                                                                                                                                           |      |       |      |      |   |   | 3 | EEEGESPLDSLAEFTWETTKWTDLFDNK                | 1 |



|                                                                                                                                                                                                                                                                             |      |       |      |      |   |   |  |   |                                        |   |
|-----------------------------------------------------------------------------------------------------------------------------------------------------------------------------------------------------------------------------------------------------------------------------|------|-------|------|------|---|---|--|---|----------------------------------------|---|
|                                                                                                                                                                                                                                                                             |      |       |      |      |   |   |  | 2 | SNQDC[339]IINKHHRNR                    | 1 |
|                                                                                                                                                                                                                                                                             |      |       |      |      |   |   |  | 2 | EKPSNC[330]AASTEK                      | 1 |
|                                                                                                                                                                                                                                                                             |      |       |      |      |   |   |  | 2 | LLGKTDVQR                              | 6 |
| TR4_HUMAN (P49116) Orphan nuclear receptor TR4 (Orphan nuclear receptor TAK1) [MASS=65414]                                                                                                                                                                                  | 0.00 | 14.26 | 0.88 | 0.00 | 1 | 5 |  |   |                                        |   |
|                                                                                                                                                                                                                                                                             |      |       |      |      |   |   |  | 3 | MTSPSPRIQIISTDSAVASPQR                 | 1 |
|                                                                                                                                                                                                                                                                             |      |       |      |      |   |   |  | 3 | LLFLSM[147]HWARSIPAFQALGQDC[339]NTSLVR | 1 |
| TRABD_HUMAN (Q9UGI0) Protein TRABID (Zinc finger Ran-binding domain-containing protein 1) [MASS=80907]                                                                                                                                                                      | 0.00 | 5.51  | *    | *    | * | 2 |  | 3 | KLLHVHFLSAQELGNEEQQEKLLR               | 2 |
|                                                                                                                                                                                                                                                                             |      |       |      |      |   |   |  | 3 | MDFQRIELAGAVGSK                        | 1 |
| TRBP2_HUMAN (Q15633) TAR RNA-binding protein 2 (Trans-activation-responsive RNA-binding protein) [MASS=39073]                                                                                                                                                               | 0.00 | 10.11 | 0.93 | 0.00 | 1 | 2 |  | 2 | ILSLRSC[330]SLGSLGALGPAC[339]C[339]R   | 1 |
|                                                                                                                                                                                                                                                                             |      |       |      |      |   |   |  | 2 | SC[339]SLGSLGALGPAC[339]C[339]R        | 1 |
| TRI55_HUMAN (Q9BYV6) Tripartite motif-containing protein 55 (Muscle-specific RING finger protein 2) (MuRF2) (MURF-2) (RING finger protein 29) [MASS=60465]                                                                                                                  | 0.00 | 2.92  | 1.14 | 0.00 | 1 | 1 |  | 2 | C[339]ASDIFQASNPYLPTR                  | 1 |
| TRIO_HUMAN (O75962) Triple functional domain protein (PTPRF-interacting protein) [MASS=341614]                                                                                                                                                                              | *    | 1.25  | *    | *    | * | 3 |  | 3 | VASHWQQLMLKM[147]EDRLK                 | 1 |
|                                                                                                                                                                                                                                                                             |      |       |      |      |   |   |  | 2 | VASHWQQLMLKMEDRLK                      | 1 |
|                                                                                                                                                                                                                                                                             |      |       |      |      |   |   |  | 2 | DFSLRMEK                               | 1 |
|                                                                                                                                                                                                                                                                             |      |       |      |      |   |   |  | 2 | MKAM[147]DVLPIKKEK                     | 1 |
| TRPM7_HUMAN (Q96QT4) Transient receptor potential cation channel subfamily M member 7 (EC 2.7.11.1) (Long transient receptor potential channel 7) (LTrpC7) (Channel-kinase 1) [MASS=212696]                                                                                 | *    | 1.50  | *    | *    | * | 2 |  | 3 | QDETMAMKLLTYELK                        | 1 |
|                                                                                                                                                                                                                                                                             |      |       |      |      |   |   |  | 2 | NFRAKHHC[330]NSC[339]C[339]R           | 1 |
| TRPV4_HUMAN (Q9HBA0) Transient receptor potential cation channel subfamily V member 4 (TrpV4) (osm-9-like TRP channel 4) (OTRPC4) (Vanilloid receptor-like channel 2) (Vanilloid receptor-like protein 2) (VRL-2) (Vanilloid receptor-related osmotically-acti [MASS=98281] | 0.00 | 4.59  | 0.67 | 0.00 | 1 | 2 |  | 3 | NSNPDEVVVPLDSMGNPRC[339]DGHQQGYPRK     | 1 |
|                                                                                                                                                                                                                                                                             |      |       |      |      |   |   |  | 2 | MYDLLLLKC[339]AR                       | 1 |

|                                                                                                                                                                                                                          |      |      |      |      |   |   |                                                                                                  |                     |   |
|--------------------------------------------------------------------------------------------------------------------------------------------------------------------------------------------------------------------------|------|------|------|------|---|---|--------------------------------------------------------------------------------------------------|---------------------|---|
| TRXR2_HUMAN (Q9NNW7) Thioredoxin reductase 2, mitochondrial precursor (EC 1.8.1.9) (TR3) (TR-beta) (Selenoprotein Z) (SeiZ) [MASS=56459]                                                                                 | 0.88 | 2.67 | 0.54 | 0.00 | 1 | 1 | 2                                                                                                | ASFVDEHTVC[330]GVAK | 1 |
| TSC2_HUMAN (P49815) Tuberin (Tuberous sclerosis 2 protein) [MASS=200748]                                                                                                                                                 | 0.00 | 1.88 | 1.12 | 0.00 | 1 | 2 | 2 M[147]IGQIC[330]EVAKTK<br>3 NLLGTHLGHSIAYNMC[339]HLM[147]EDR                                   | 1<br>1              |   |
| TSH3_HUMAN (Q63HK5) Teashirt homolog 3 (Zinc finger protein 537) [MASS=118565]                                                                                                                                           | *    | 2.22 | *    | *    | * | 1 | 3 MEASSDGGFRSQENSPSPPRDGC[330]K                                                                  | 1                   |   |
| TSP2_HUMAN (P35442) Thrombospondin-2 precursor [MASS=129955]                                                                                                                                                             | *    | 3.75 | *    | *    | * | 3 | 2 AC[330]VGDVQERQM[147]C[339]NKR<br>3 GNQPVGVGLEAAK<br>3 GTTQIDPNWVIRHQGK                        | 1<br>1<br>1         |   |
| TSSP_HUMAN (Q9NQE7) Thymus-specific serine protease precursor (EC 3.4.-.-) [MASS=55049]                                                                                                                                  | *    | 9.34 | *    | *    | * | 2 | 2 RAVQIVLHSLGQKC[339]LSFSR<br>3 LGEHIQQFQESSAQGLGLSLGPGAAALPK                                    | 1<br>1              |   |
| TTC3_HUMAN (P53804) Tetratricopeptide repeat protein 3 (TPR repeat protein 3) (TPR repeat protein D) [MASS=229890]                                                                                                       | *    | 3.06 | *    | *    | * | 3 | 2 PENYLLYGNRALC[339]FLR<br>2 DKFPALHSALDEFFDIMDSR<br>3 NLEFDIC[339]SIWC[339]SKPISVLQDYC[339]DAIK | 1<br>1<br>1         |   |
| TTLL2_HUMAN (Q9BWW7) Tubulin--tyrosine ligase-like protein 2 (Testis-specific protein NYD-TSPG) [MASS=67237]                                                                                                             | *    | 8.11 | *    | *    | * | 3 | 2 QM[147]LGTKHSYWIC[339]K<br>3 GGLDAPDC[330]LPYDSLSTSR<br>2 M[147]YNEDDSVVEKAVSVR                | 1<br>1<br>1         |   |
| TULP1_HUMAN (O00294) Tubby-related protein 1 (Tubby-like protein 1) [MASS=60650]                                                                                                                                         | *    | 6.27 | *    | *    | * | 2 | 3 AKEERAPSPPEVDEPR<br>3 GSGEADKDPSPASAR                                                          | 1<br>1              |   |
| TXND3_HUMAN (Q8N427) Thioredoxin domain-containing protein 3 (Spermatid-specific thioredoxin-2) (Sptrx-2) (NM23-H8) [MASS=67269]                                                                                         | 0.00 | 5.61 | 1.00 | 0.00 | 1 | 2 | 2 LLSPDSIRAQFGISKLK<br>2 GLTVIDVYQAWC[339]GPC[339]R                                              | 1<br>1              |   |
| TYRO3_HUMAN (Q06418) Tyrosine-protein kinase receptor TYRO3 precursor (EC 2.7.10.1) (Tyrosine-protein kinase RSE) (Tyrosine-protein kinase SKY) (Tyrosine-protein kinase DTK) (Protein-tyrosine kinase byk) [MASS=96905] | 0.41 | 4.61 | 4.06 | 0.00 | 1 | 2 | 2 IYSGDYRQGC[339]ASKLPVK<br>3 M[147]LKADIIASSDIEEFLREAAC[339]M[147]K                             | 1<br>2              |   |
| UBE1_HUMAN (P22314) Ubiquitin-activating enzyme E1 (A1S9 protein) [MASS=117848]                                                                                                                                          | *    | 3.02 | *    | *    | * | 2 | 3 LEITMLSQGVSM[147]LYSFFMPAAKLKER<br>1 SLVLQR                                                    | 1<br>1              |   |
| UBE3C_HUMAN (Q15386) Ubiquitin-protein ligase E3C (EC 6.3.2.-) [MASS=123922]                                                                                                                                             | 0.00 | 5.63 | 0.27 | 0.00 | 1 | 2 | 3 VPIAKILLENVLKPLHFTYNSC[339]PEGAR<br>3 TTNEGLLYPNPAAQMLVGDSEFARHYFLGRM[147]LGK                  | 1<br>1              |   |

|                                                                                                                                                                                                                                |      |      |      |      |   |   |   |                                              |   |
|--------------------------------------------------------------------------------------------------------------------------------------------------------------------------------------------------------------------------------|------|------|------|------|---|---|---|----------------------------------------------|---|
| UBE4B_HUMAN (O95155) Ubiquitin conjugation factor E4 B (Ubiquitin-fusion degradation protein 2) (Homozygously deleted in neuroblastoma 1) [MASS=146184]                                                                        | *    | 1.15 | *    | *    | * | 1 | 2 | M[147]C[339]SQPAVSQLLSNIR                    | 1 |
| UBP28_HUMAN (Q96RU2) Ubiquitin carboxyl-terminal hydrolase 28 (EC 3.1.2.15) (Ubiquitin thioesterase 28) (Ubiquitin-specific-processing protease 28) (Deubiquitinating enzyme 28) [MASS=122490]                                 | 0.00 | 4.64 | 0.83 | 0.00 | 1 | 3 | 2 | PLTSSRSSMEMPSQPAPR                           | 1 |
|                                                                                                                                                                                                                                |      |      |      |      |   |   | 2 | FPLPDM[147]LKYYVIEFASTK                      | 1 |
|                                                                                                                                                                                                                                |      |      |      |      |   |   | 2 | C[330]EVWGENPNPDWRR                          | 1 |
| UBP38_HUMAN (Q8NB14) Ubiquitin carboxyl-terminal hydrolase 38 (EC 3.1.2.15) (Ubiquitin thioesterase 38) (Ubiquitin-specific-processing protease 38) (Deubiquitinating enzyme 38) (HP43.8KD) [MASS=116545]                      | 0.00 | 5.09 | 0.59 | 0.49 | 2 | 2 | 2 | TGLINLGNTC[330]YM[147]NSVIQALFMATDFRR        | 1 |
|                                                                                                                                                                                                                                |      |      |      |      |   |   | 3 | TGLINLGNTC[330]YM[147]NSVIQALFM[147]ATDFR    | 1 |
| UBP4_HUMAN (Q13107) Ubiquitin carboxyl-terminal hydrolase 4 (EC 3.1.2.15) (Ubiquitin thioesterase 4) (Ubiquitin-specific-processing protease 4) (Deubiquitinating enzyme 4) (Ubiquitous nuclear protein homolog) [MASS=108564] | *    | 2.80 | *    | *    | * | 2 | 2 | LFNIPAERETRLWNK                              | 1 |
|                                                                                                                                                                                                                                |      |      |      |      |   |   | 3 | VVEHGLFVKHC[330]K                            | 1 |
| UBP5_HUMAN (P45974) Ubiquitin carboxyl-terminal hydrolase 5 (EC 3.1.2.15) (Ubiquitin thioesterase 5) (Ubiquitin-specific-processing protease 5) (Deubiquitinating enzyme 5) (Isopeptidase T) [MASS=95786]                      | 1.00 | 9.79 | 0.69 | 0.00 | 1 | 3 | 3 | ATNNSLERAVDWIFSHIDDLDAEAM[147]DISEGR         | 1 |
|                                                                                                                                                                                                                                |      |      |      |      |   |   | 2 | NLGNSC[330]YLNNSVQVLFSPDFQR                  | 1 |
|                                                                                                                                                                                                                                |      |      |      |      |   |   | 3 | DGPGKYQLFAFISHM[147]GTSTMC[330]GHYVC[339]HIK | 1 |
| UBR1_HUMAN (Q8I WV7) Ubiquitin-protein ligase E3 component N-recognin-1 (EC 6.-.-) (Ubiquitin-protein ligase E3-alpha-1) (Ubiquitin-protein ligase E3-alpha-I) [MASS=200209]                                                   | 0.00 | 2.52 | 6.86 | 0.00 | 1 | 3 | 2 | C[339]PLNEEVIVQAR                            | 1 |
|                                                                                                                                                                                                                                |      |      |      |      |   |   | 2 | QHNGLKALMQFAVAQRITC[330]PQVLIQK              | 1 |
|                                                                                                                                                                                                                                |      |      |      |      |   |   | 1 | VPPDER                                       | 1 |
| UBR2_HUMAN (Q8I WV8) Ubiquitin-protein ligase E3 component N-recognin-2 (EC 6.-.-) (Ubiquitin-protein ligase E3-alpha-2) (Ubiquitin-protein ligase E3-alpha-II) [MASS=200537]                                                  | 0.00 | 2.96 | 0.86 | 0.00 | 1 | 3 | 3 | YRMTTSGGGGFC[339]DC[330]GDTEAWKEGPYC[330]QK  | 1 |
|                                                                                                                                                                                                                                |      |      |      |      |   |   | 2 | RNGFSLVNQIYYYYHNVK                           | 1 |
|                                                                                                                                                                                                                                |      |      |      |      |   |   | 2 | YC[330]VSQEK                                 | 1 |

|                                                                                                                                                                                                                                  |                                  |       |      |      |   |   |   |                                       |   |
|----------------------------------------------------------------------------------------------------------------------------------------------------------------------------------------------------------------------------------|----------------------------------|-------|------|------|---|---|---|---------------------------------------|---|
| UCHL1_HUMAN (P09936) Ubiquitin carboxyl-terminal hydrolase isozyme L1 (EC 3.4.19.12) (EC 6.-.-.-) (UCH-L1) (Ubiquitin thioesterase L1) (Neuron cytoplasmic protein 9.5) (PGP 9.5) (PGP9.5) [MASS=24824]                          | 1.00                             | 47.53 | 1.02 | 0.11 | 4 | 5 | 3 | C[339]FEKNEAIQAAHDAVAQEGQC[339]R      | 1 |
|                                                                                                                                                                                                                                  |                                  |       |      |      |   |   | 2 | QTIGNSC[330]GTIGLIHAVANNQDK           | 1 |
|                                                                                                                                                                                                                                  |                                  |       |      |      |   |   | 3 | NEAIQAAHDAVAQEGQC[339]R               | 1 |
|                                                                                                                                                                                                                                  |                                  |       |      |      |   |   | 3 | QTIGNSC[339]GTIGLIHAVANNQDKLGFEDGSVLK | 1 |
|                                                                                                                                                                                                                                  |                                  |       |      |      |   |   | 2 | VLSRLGVAGQWR                          | 1 |
| 3                                                                                                                                                                                                                                | C[330]FEKNEAIQAAHDAVAQEGQC[330]R | 1     |      |      |   |   |   |                                       |   |
| UCP4_HUMAN (O95847) Mitochondrial uncoupling protein 4 (UCP 4) (Solute carrier family 25 member 27) [MASS=36064]                                                                                                                 | 0.99                             | 6.81  | 0.85 | 0.00 | 1 | 1 | 2 | FLLSGC[330]AATVAELATFPLDLTK           | 1 |
| UCRH_HUMAN (P07919) Ubiquinol-cytochrome c reductase complex 11 kDa protein, mitochondrial precursor (EC 1.10.2.2) (Mitochondrial hinge protein) (Cytochrome C1, nonheme 11 kDa protein) (Complex III subunit VIII) [MASS=10739] | 1.00                             | 26.37 | 1.57 | 0.04 | 8 | 3 | 2 | EQC[330]EQLEK                         | 1 |
|                                                                                                                                                                                                                                  |                                  |       |      |      |   |   | 2 | EQC[339]EQLEK                         | 1 |
|                                                                                                                                                                                                                                  |                                  |       |      |      |   |   | 2 | ERLELC[330]DER                        | 1 |
|                                                                                                                                                                                                                                  |                                  |       |      |      |   |   | 2 | DHC[330]VAHK                          | 1 |
|                                                                                                                                                                                                                                  |                                  |       |      |      |   |   | 2 | ERLELC[339]DER                        | 2 |
|                                                                                                                                                                                                                                  |                                  |       |      |      |   |   | 2 | DHC[339]VAHK                          | 1 |
| 1                                                                                                                                                                                                                                | EQC[339]EQLEK                    | 1     |      |      |   |   |   |                                       |   |
| UCRQ_HUMAN (O14949) Ubiquinol-cytochrome c reductase complex ubiquinone-binding protein QP-C (EC 1.10.2.2) (Ubiquinol-cytochrome c reductase complex 9.5 kDa protein) (Complex III subunit VII) [MASS=9775]                      | *                                | 9.88  | *    | *    | * | 1 | 2 | RIRESFFR                              | 1 |
| UGGG1_HUMAN (Q9NYU2) UDP-glucose:glycoprotein glucosyltransferase 1 precursor (EC 2.4.1.-) (UDP-glucose ceramide glucosyltransferase-like 1) (UDP--Glc:glycoprotein glucosyltransferase) (HUGT1) [MASS=174976]                   | 0.00                             | 5.16  | *    | *    | * | 3 | 3 | KEARGYYEQTGVGPLPVVLFNGM[147]PFER      | 1 |
|                                                                                                                                                                                                                                  |                                  |       |      |      |   |   | 3 | GTEVNTTVIGENDPIDEVQGFLFGKLR           | 1 |
|                                                                                                                                                                                                                                  |                                  |       |      |      |   |   | 3 | EIYDSSFIRPVTFWIVGDFDSPSGR             | 1 |
|                                                                                                                                                                                                                                  |                                  |       |      |      |   |   |   |                                       |   |
| ULK1_HUMAN (O75385) Serine/threonine-protein kinase ULK1 (EC 2.7.11.1) (Unc-51-like kinase 1) [MASS=112601]                                                                                                                      | 0.00                             | 4.95  | 2.48 | 0.00 | 1 | 2 | 2 | LFLQQIAGAM[147]RLLHSKGIHR             | 1 |
|                                                                                                                                                                                                                                  |                                  |       |      |      |   |   | 3 | LPKPPTDPLGAVFSPQASPPQPSHGLQSC[339]R   | 1 |
| UN13C_HUMAN (Q8NB66) Unc-13 homolog C (Munc13-3) (Fragment) [MASS=135621]                                                                                                                                                        | 0.00                             | 5.55  | 0.79 | 0.00 | 1 | 4 | 3 | TLPIVRDVAMTLAARK                      | 1 |
|                                                                                                                                                                                                                                  |                                  |       |      |      |   |   | 3 | YALSLYTQTTDALIK                       | 1 |
|                                                                                                                                                                                                                                  |                                  |       |      |      |   |   | 2 | KTLPIVRDVAM[147]TLAAR                 | 1 |
|                                                                                                                                                                                                                                  |                                  |       |      |      |   |   | 2 | YGIESIQAM[147]THFSC[330]LSSK          | 1 |

|                                                                                                                                                                                                                                   |      |       |      |      |   |   |  |   |                                             |   |
|-----------------------------------------------------------------------------------------------------------------------------------------------------------------------------------------------------------------------------------|------|-------|------|------|---|---|--|---|---------------------------------------------|---|
|                                                                                                                                                                                                                                   |      |       |      |      |   |   |  | 3 | NALVSHLDGTTTPVC[339]EDIGR                   | 3 |
| UQCR1_HUMAN (P31930) Ubiquinol-cytochrome-c reductase complex core protein I, mitochondrial precursor (EC 1.10.2.2) [MASS=52645]                                                                                                  | 1.00 | 17.29 | 1.45 | 0.02 | 4 | 4 |  | 2 | NALVSHLDGTTTPVC[339]EDIGR                   | 2 |
|                                                                                                                                                                                                                                   |      |       |      |      |   |   |  | 2 | LC[339]TSATESEVAR                           | 1 |
|                                                                                                                                                                                                                                   |      |       |      |      |   |   |  | 3 | IPLAEWESRIAEVDASVVREIC[339]SK               | 1 |
|                                                                                                                                                                                                                                   |      |       |      |      |   |   |  | 3 | MKIDDM[147]MFVLQGQWM[147]RLC[330]TSATESEVAR | 1 |
| UQCR2_HUMAN (P22695) Ubiquinol-cytochrome-c reductase complex core protein 2, mitochondrial precursor (EC 1.10.2.2) (Complex III subunit II) [MASS=48443]                                                                         | 1.00 | 2.87  | 1.24 | 0.07 | 3 | 1 |  | 2 | NALANPLYC[330]PDYR                          | 2 |
|                                                                                                                                                                                                                                   |      |       |      |      |   |   |  | 2 | NALANPLYC[339]PDYR                          | 1 |
| VA0D_HUMAN (P61421) Vacuolar ATP synthase subunit d (EC 3.6.3.14) (V-ATPase d subunit) (Vacuolar proton pump d subunit) (V-ATPase AC39 subunit) (V-ATPase 40 kDa accessory protein) (P39) (32 kDa accessory protein) [MASS=40329] | 0.69 | 1.99  | 0.71 | 0.15 | 4 | 1 |  | 2 | LFPHC[339]GR                                | 2 |
|                                                                                                                                                                                                                                   |      |       |      |      |   |   |  | 2 | LFPHC[330]GR                                | 2 |
| VAPA_HUMAN (Q9P0L0) Vesicle-associated membrane protein-associated protein A (VAMP-associated protein A) (VAMP-A) (VAP-A) (33 kDa Vamp-associated protein) (VAP-33) [MASS=27317]                                                  | 0.00 | 17.36 | 0.30 | 1.51 | 2 | 2 |  | 3 | C[339]VFEM[147]PNENDKLNDM[147]EPSK          | 1 |
|                                                                                                                                                                                                                                   |      |       |      |      |   |   |  | 2 | FM[147]VQTIFAPPNTSDMEAVWKEAK                | 1 |
|                                                                                                                                                                                                                                   |      |       |      |      |   |   |  | 2 | C[330]VFEM[147]PNENDKLNDM[147]EPSK          | 1 |
| VATA1_HUMAN (P38606) Vacuolar ATP synthase catalytic subunit A, ubiquitous isoform (EC 3.6.3.14) (V-ATPase subunit A 1) (Vacuolar proton pump alpha subunit 1) (V-ATPase 69 kDa subunit 1) (Isoform VA68) [MASS=68304]            | 0.00 | 6.81  | 4.71 | 0.00 | 1 | 3 |  | 3 | FC[330]PFYKTVGMLSNMIAFYDMARR                | 1 |
|                                                                                                                                                                                                                                   |      |       |      |      |   |   |  | 2 | C[339]LGNPER                                | 1 |
|                                                                                                                                                                                                                                   |      |       |      |      |   |   |  | 2 | AGRVKC[339]LGNPER                           | 1 |
| VATB1_HUMAN (P15313) Vacuolar ATP synthase subunit B, kidney isoform (EC 3.6.3.14) (V-ATPase B1 subunit) (Vacuolar proton pump B isoform 1) (Endomembrane proton pump 58 kDa subunit) [MASS=56980]                                | 0.00 | 5.26  | 0.88 | 0.00 | 1 | 2 |  | 2 | PGGLPGSSC[330]NLGAAR                        | 1 |
|                                                                                                                                                                                                                                   |      |       |      |      |   |   |  | 2 | KTTC[339]EFTGDILR                           | 1 |

|                                                                                                                                                                                                                                              |      |       |      |      |   |   |                                                                                                             |                             |   |
|----------------------------------------------------------------------------------------------------------------------------------------------------------------------------------------------------------------------------------------------|------|-------|------|------|---|---|-------------------------------------------------------------------------------------------------------------|-----------------------------|---|
| VATB2_HUMAN (P21281) Vacuolar ATP synthase subunit B, brain isoform (EC 3.6.3.14) (V-ATPase B2 subunit) (Vacuolar proton pump B isoform 2) (Endomembrane proton pump 58 kDa subunit) (HO57) [MASS=56500]                                     | 0.99 | 3.52  | 0.79 | 0.00 | 1 | 1 | 2                                                                                                           | KDHADVSNQLYAC[330]YAIGK     | 1 |
| VATH_HUMAN (Q9UI12) Vacuolar ATP synthase subunit H (EC 3.6.3.14) (V-ATPase H subunit) (Vacuolar proton pump H subunit) (V-ATPase 50/57 kDa subunits) (Vacuolar proton pump subunit SFD) (VMA13) (Nef-binding protein 1) (NBP1) [MASS=55883] | *    | 4.35  | *    | *    | * | 1 | 3                                                                                                           | QDPFTVHM[147]JAARIIAKLAAWGK | 1 |
| VAV2_HUMAN (P52735) Protein vav-2 [MASS=101256]                                                                                                                                                                                              | 0.00 | 5.24  | 0.68 | 0.00 | 1 | 3 | 2 KSGYFPSSSVK<br>2 YMQKMGM[147]TEDDKR<br>3 MWSYGFYLIHLQKGQGFQFFC[330]K                                      | 1<br>1<br>1                 |   |
| VCAM1_HUMAN (P19320) Vascular cell adhesion protein 1 precursor (V-CAM 1) (CD106 antigen) (INCAM-100) [MASS=81276]                                                                                                                           | *    | 1.76  | *    | *    | * | 1 | 2 LHIDDM[147]EFEPKQR                                                                                        | 1                           |   |
| VDAC1_HUMAN (P21796) Voltage-dependent anion-selective channel protein 1 (VDAC-1) (hVDAC1) (Outer mitochondrial membrane protein porin 1) (Plasmalemmal porin) (Porin 31HL) (Porin 31HM) [MASS=30641]                                        | 1.00 | 10.99 | 0.99 | 0.05 | 7 | 2 | 2 YQIDPDAC[339]FSAK<br>2 EHINLGC[339]DMDFDIAGPSIR<br>2 EHINLGC[339]DM[147]DFDIAGPSIR<br>2 YQIDPDAC[330]FSAK | 3<br>1<br>1<br>2            |   |
| VDAC2_HUMAN (P45880) Voltage-dependent anion-selective channel protein 2 (VDAC-2) (hVDAC2) (Outer mitochondrial membrane protein porin 2) [MASS=38092]                                                                                       | 1.00 | 8.65  | 1.08 | 0.02 | 3 | 2 | 2 SC[330]SGVEFSTSGSSNTDTGK<br>2 WC[339]EYGLTFTEK<br>2 WC[330]EYGLTFTEK                                      | 1<br>1<br>1                 |   |
| VDAC3_HUMAN (Q9Y277) Voltage-dependent anion-selective channel protein 3 (VDAC-3) (hVDAC3) (Outer mitochondrial membrane protein porin 3) [MASS=30658]                                                                                       | 0.87 | 3.89  | 1.05 | 0.00 | 1 | 1 | 2 VC[339]NYGLTFTQK                                                                                          | 1                           |   |
| VDP_HUMAN (O60763) General vesicular transport factor p115 (Transcytosis-associated protein) (TAP) (Vesicle docking protein) [MASS=107907]                                                                                                   | *    | 1.35  | *    | *    | * | 1 | 3 RNQELLQSQLTEK                                                                                             | 1                           |   |

|                                                                                                                                                                                                                                                                             |      |       |      |      |   |   |   |                                                 |   |
|-----------------------------------------------------------------------------------------------------------------------------------------------------------------------------------------------------------------------------------------------------------------------------|------|-------|------|------|---|---|---|-------------------------------------------------|---|
| VGFR3_HUMAN (P35916) Vascular endothelial growth factor receptor 3 precursor (EC 2.7.10.1) (VEGFR-3) (Tyrosine-protein kinase receptor FLT4) [MASS=145598]                                                                                                                  | 0.00 | 2.47  | 1.16 | 0.00 | 1 | 1 | 3 | ARPAFSELVEILGDLLQGRGLQEEEEVC[330]MAPR           | 1 |
| VISL1_HUMAN (P62760) Visinin-like protein 1 (VILIP) (Hippocalcin-like protein 3) (HLP3) [MASS=22011]                                                                                                                                                                        | 0.00 | 12.63 | 0.82 | 0.00 | 1 | 1 | 3 | TFDKNGDGTIDFREFIC[339]ALSITSR                   | 1 |
| VP13B_HUMAN (Q7Z7G8) Vacuolar protein sorting 13B (Cohen syndrome protein 1) [MASS=448732]                                                                                                                                                                                  | *    | 2.21  | *    | *    | * | 5 | 2 | QVLPM[147]QVTQ HARALVNPVKLR                     | 1 |
|                                                                                                                                                                                                                                                                             |      |       |      |      |   |   | 2 | AM[147]C[330]LKGIMGVKDFEENMNR                   | 1 |
|                                                                                                                                                                                                                                                                             |      |       |      |      |   |   | 3 | KDIYQRALNLGILR                                  | 1 |
|                                                                                                                                                                                                                                                                             |      |       |      |      |   |   | 2 | SPENNGTR                                        | 1 |
|                                                                                                                                                                                                                                                                             |      |       |      |      |   |   | 2 | PIGGAAELVSQTGYGILHGAGLSQLPK                     | 1 |
| VP33B_HUMAN (Q9H267) Vacuolar protein sorting 33B (hVPS33B) [MASS=70615]                                                                                                                                                                                                    | *    | 3.73  | *    | *    | * | 1 | 2 | RAGLLTEQAPGDTLTAVESKVS                          | 1 |
| VPP1_HUMAN (Q93050) Vacuolar proton translocating ATPase 116 kDa subunit a isoform 1 (V-ATPase 116 kDa isoform a1) (Clathrin-coated vesicle/synaptic vesicle proton pump 116 kDa subunit) (Vacuolar proton pump subunit 1) (Vacuolar adenosine triphosphatase [MASS=96412]) | 1.00 | 4.54  | 1.06 | 0.07 | 2 | 3 | 2 | EM[147]ASGVNTRIDDLQM[147]VLNQTEDHR              | 1 |
|                                                                                                                                                                                                                                                                             |      |       |      |      |   |   | 2 | KIC[330]EGFR                                    | 1 |
|                                                                                                                                                                                                                                                                             |      |       |      |      |   |   | 2 | RC[330]EEMDR                                    | 1 |
| VPS28_HUMAN (Q9UK41) VPS28 protein homolog [MASS=25425]                                                                                                                                                                                                                     | *    | 10.41 | *    | *    | * | 1 | 3 | YDNMAELFAVVKTM[147]QALEKAYIK                    | 1 |
| VPS29_HUMAN (Q9UBQ0) Vacuolar protein sorting 29 (Vesicle protein sorting 29) (hVPS29) (PEP11) [MASS=20506]                                                                                                                                                                 | 0.00 | 7.14  | 0.91 | 0.00 | 1 | 1 | 2 | IQHILC[339]TGNL C[339]TK                        | 1 |
| VPS35_HUMAN (Q96QK1) Vacuolar protein sorting 35 (Vesicle protein sorting 35) (hVPS35) (Maternal-embryonic 3) [MASS=91706]                                                                                                                                                  | 0.00 | 6.41  | 1.88 | 0.00 | 1 | 3 | 2 | AC[339]AELHQNVNVK                               | 1 |
|                                                                                                                                                                                                                                                                             |      |       |      |      |   |   | 3 | LLKIPVDTYNNILTVLK                               | 1 |
|                                                                                                                                                                                                                                                                             |      |       |      |      |   |   | 2 | PDQGRAVSTC[339]AHLFWSGRNTDK                     | 1 |
| VPS4A_HUMAN (Q9UN37) Vacuolar sorting protein 4a (SKD2 protein) (hVPS4) (VPS4-1) [MASS=48898]                                                                                                                                                                               | 0.00 | 14.87 | 0.70 | 0.00 | 1 | 3 | 3 | TNPSMMIDLLTPC[330]SPGDPGAM[147]EMTWM[147]DVPGDK | 1 |
|                                                                                                                                                                                                                                                                             |      |       |      |      |   |   | 3 | KLQEQLM[147]GAVVMEKPNIR                         | 1 |
|                                                                                                                                                                                                                                                                             |      |       |      |      |   |   | 3 | KLQEQLMGAVVM[147]JEK                            | 1 |
| VPS54_HUMAN (Q9P1Q0) Vacuolar protein sorting protein 54 (Tumor antigen SLP-8p) (Hepatocellular carcinoma protein 8) [MASS=110588]                                                                                                                                          | *    | 2.25  | *    | *    | * | 2 | 2 | LVAIM[147]DSLFDKLLSK                            | 1 |
|                                                                                                                                                                                                                                                                             |      |       |      |      |   |   | 2 | FTIFLQR                                         | 1 |
| VWF_HUMAN (P04275) Von Willebrand factor precursor (vWF) [Contains: Von Willebrand antigen II] [MASS=309298]                                                                                                                                                                | *    | 2.35  | *    | *    | * | 3 | 3 | EIRYQGGNRTNTGLALR                               | 1 |
|                                                                                                                                                                                                                                                                             |      |       |      |      |   |   | 3 | PC[330]EDSC[330]RSGFTYVLHEGEC[330]C[339]GR      | 1 |
|                                                                                                                                                                                                                                                                             |      |       |      |      |   |   | 3 | ASPPSSSC[330]NISSGEMQKGLWEQC[330]QLLK           | 1 |

|                                                                                                                                                                                                                                 |      |       |      |      |   |   |   |                                            |   |
|---------------------------------------------------------------------------------------------------------------------------------------------------------------------------------------------------------------------------------|------|-------|------|------|---|---|---|--------------------------------------------|---|
| WDFY3_HUMAN (Q8IZQ1) WD repeat and FYVE domain-containing protein 3 (Autophagy-linked FYVE protein) (Alfy) [MASS=395256]                                                                                                        | 0.00 | 1.33  | 0.96 | 0.00 | 1 | 3 | 2 | WM[147]LEM[147]TEGPC[330]RMR               | 1 |
|                                                                                                                                                                                                                                 |      |       |      |      |   |   | 3 | ELIPEFFYLPEFLFNSNNFDLGC[330]K              | 1 |
|                                                                                                                                                                                                                                 |      |       |      |      |   |   | 2 | HM[147]TQKEQEEK                            | 1 |
| WDR13_HUMAN (Q9H1Z4) WD repeat protein 13 [MASS=53715]                                                                                                                                                                          | 0.00 | 5.36  | 0.14 | 0.00 | 1 | 2 | 2 | VLALSFDAPGR                                | 1 |
|                                                                                                                                                                                                                                 |      |       |      |      |   |   | 3 | EARDPSLLINAC[330]LNK                       | 2 |
| WDR20_HUMAN (Q8TBZ3) WD repeat protein 20 (DMR protein) [MASS=62933]                                                                                                                                                            | 0.00 | 2.46  | 1.45 | 0.00 | 1 | 1 | 3 | MEDVPLLEPLIC[339]KK                        | 1 |
| WDR22_HUMAN (Q96JK2) WD repeat protein 22 (Breakpoint cluster region protein 2) (BCRP2) [MASS=103963]                                                                                                                           | *    | 1.91  | *    | *    | * | 1 | 3 | LPVFQFDNQGYFNCS[330]TM[147]K               | 1 |
| WDR24_HUMAN (Q96S15) WD repeat protein 24 [MASS=101989]                                                                                                                                                                         | *    | 1.09  | *    | *    | * | 1 | 2 | GWLATGGRDK                                 | 1 |
| WDR33_HUMAN (Q9C0J8) WD repeat protein 33 (WD repeat protein WDC146) [MASS=145920]                                                                                                                                              | 0.00 | 4.49  | *    | *    | * | 2 | 3 | MFQAHKEAIREASFSPTDNK                       | 1 |
|                                                                                                                                                                                                                                 |      |       |      |      |   |   | 3 | PPGPQGMGPQGPPHQQGGGPPQGM[147]GPQGPQPPQGLPR | 1 |
| WDR43_HUMAN (Q15061) WD repeat protein 43 [MASS=79118]                                                                                                                                                                          | 0.00 | 3.47  | 2.18 | 0.00 | 1 | 2 | 2 | LLNVWQVRSENK                               | 1 |
|                                                                                                                                                                                                                                 |      |       |      |      |   |   | 3 | DC[330]AC[330]VGEGAAPPR                    | 1 |
| WDR65_HUMAN (Q96MR6) WD repeat protein 65 [MASS=78164]                                                                                                                                                                          | *    | 2.29  | *    | *    | * | 2 | 1 | GHTGKIR                                    | 1 |
|                                                                                                                                                                                                                                 |      |       |      |      |   |   | 2 | EIADSLILR                                  | 1 |
| WDR6_HUMAN (Q9NNW5) WD repeat protein 6 [MASS=121724]                                                                                                                                                                           | *    | 1.69  | *    | *    | * | 1 | 3 | AEMHC[330]FSIMVTPDPSTPSR                   | 1 |
| WDR72_HUMAN (Q3MJ13) WD repeat protein 72 [MASS=123408]                                                                                                                                                                         | *    | 2.36  | *    | *    | * | 1 | 3 | QPYIVSAAENGEMC[330]VWVNTNGQC[339]VEK       | 1 |
| WNT9B_HUMAN (O14905) Protein Wnt-9b precursor (Wnt-15) (Wnt-14b) [MASS=38971]                                                                                                                                                   | 0.00 | 15.97 | 0.23 | 0.00 | 1 | 3 | 3 | SGDLVYMEDSPSFC[330]RPSK                    | 1 |
|                                                                                                                                                                                                                                 |      |       |      |      |   |   | 2 | LRYDSAVKVSSATNEALGR                        | 1 |
|                                                                                                                                                                                                                                 |      |       |      |      |   |   | 2 | GLAPRSGDLVYMEDSPSFC[339]R                  | 1 |
| XAB2_HUMAN (Q9HCS7) XPA-binding protein 2 (HCNP protein) [MASS=100009]                                                                                                                                                          | 0.00 | 1.40  | 1.18 | 0.00 | 1 | 1 | 2 | EM[147]C[339]LRFADMEC[339]K                | 1 |
| XPO5_HUMAN (Q9HAV4) Exportin-5 (Exp5) (Ran-binding protein 21) [MASS=136310]                                                                                                                                                    | 0.00 | 8.31  | 0.89 | 0.00 | 1 | 5 | 3 | ALDM[147]LDAEKSAILGLPQPLELNDSPVFK          | 1 |
|                                                                                                                                                                                                                                 |      |       |      |      |   |   | 2 | DSLQDFDC[330]KLLNPSLQKVADK                 | 1 |
|                                                                                                                                                                                                                                 |      |       |      |      |   |   | 2 | C[330]ALM[147]EALVLISNQFKNYER              | 1 |
|                                                                                                                                                                                                                                 |      |       |      |      |   |   | 2 | EKC[330]PIC[339]VPC[330]GLRLAEK            | 1 |
|                                                                                                                                                                                                                                 |      |       |      |      |   |   | 2 | MAM[147]DQVNALC[330]EQLVK                  | 1 |
| XPP2_HUMAN (O43895) Xaa-Pro aminopeptidase 2 precursor (EC 3.4.11.9) (X-Pro aminopeptidase 2) (Membrane-bound aminopeptidase P) (Membrane-bound APP) (Membrane-bound AmP) (mAmP) (Aminoacylproline aminopeptidase) [MASS=75624] | 0.00 | 3.56  | 0.69 | 0.00 | 1 | 1 | 3 | NC[330]STNPPYLPVTVVNTTM[147]SLTALR         | 1 |



|                                                                                                                                                                                          |      |       |      |      |   |   |                       |                                                                                                                             |                       |
|------------------------------------------------------------------------------------------------------------------------------------------------------------------------------------------|------|-------|------|------|---|---|-----------------------|-----------------------------------------------------------------------------------------------------------------------------|-----------------------|
| XYLT2_HUMAN (Q9H1B5) Xylosyltransferase 2 (EC 2.4.2.26) (Xylosyltransferase II) (xylT-II) (XT-II) (Peptide O-xylosyltransferase 1) [MASS=96711]                                          | 0.00 | 3.35  | 0.46 | 0.00 | 1 | 1 | 3                     | HC[330]QLTGKMSPGIQWDESQAQQPMDGPPVR                                                                                          | 1                     |
| YTHD3_HUMAN (Q7Z739) YTH domain protein 3 [MASS=63861]                                                                                                                                   | 0.00 | 3.76  | 1.71 | 0.00 | 1 | 1 | 3                     | GPLYLLFSVNGSGHFC[339]GVAEMK                                                                                                 | 1                     |
| YYAP1_HUMAN (Q9H869) YY1-associated protein 1 (Hepatocellular carcinoma susceptibility protein) (Hepatocellular carcinoma-associated protein 2) [MASS=87915]                             | 0.00 | 2.51  | 2.18 | 0.00 | 1 | 1 | 3                     | SLAATPSSSLPC[339]TLIALGLR                                                                                                   | 1                     |
| ZAN_HUMAN (Q9Y493) Zonadhesin precursor [MASS=305571]                                                                                                                                    | *    | 2.24  | *    | *    | * | 4 | 2<br>3<br>1<br>2      | C[339]VEAC[339]EC[330]NPGFVLSGLEC[339]IPR<br>FPRAIPAEEEGQGAELGLR<br>TEDALLR<br>GSTAYLDIALDALSIR                             | 1<br>1<br>1<br>1      |
| ZBT11_HUMAN (O95625) Zinc finger and BTB domain-containing protein 11 [MASS=119382]                                                                                                      | 0.00 | 7.79  | 1.30 | 0.00 | 1 | 5 | 2<br>2<br>3<br>2<br>2 | KQFQYSASLR<br>KGEVQTVASTQDLR<br>RHM[147]NNHEGVKPFEC[339]LTC[339]GVAWADAR<br>HTGVKPHAC[339]QVC[339]GK<br>RRDLIEAAHLGPGGTHHTR | 1<br>1<br>1<br>1<br>1 |
| ZBT39_HUMAN (O15060) Zinc finger and BTB domain-containing protein 39 [MASS=79001]                                                                                                       | 0.23 | 2.81  | 0.96 | 0.00 | 1 | 1 | 2                     | C[330]NSGLDARPGFGLQHPALQK                                                                                                   | 1                     |
| ZBT40_HUMAN (Q9NUA8) Zinc finger and BTB domain-containing protein 40 [MASS=138118]                                                                                                      | *    | 1.69  | *    | *    | * | 2 | 3<br>2                | C[330]RMSFPTLQDHR<br>GPQKEM[147]IVK                                                                                         | 1<br>1                |
| ZCH11_HUMAN (Q5TAX3) Zinc finger CCHC domain-containing protein 11 [MASS=185132]                                                                                                         | 0.00 | 3.41  | 0.68 | 0.00 | 1 | 5 | 2<br>2<br>2<br>3<br>2 | VPVVVC[339]R<br>AVQVIGNQTLKARNDK<br>LGLKQAEER<br>C[330]FDELSPPC[339]SEQHNR<br>RC[330]DIGDASR                                | 1<br>1<br>1<br>1<br>1 |
| ZCHC6_HUMAN (Q5VYS8) Zinc finger CCHC domain-containing protein 6 [MASS=171228]                                                                                                          | 0.00 | 1.81  | 1.14 | 0.00 | 1 | 3 | 1<br>2<br>3           | QRSRPR<br>TVRRLFHK<br>GPC[339]AVSSNPYAFK                                                                                    | 1<br>1<br>1           |
| ZDH14_HUMAN (Q8IZN3) Probable palmitoyltransferase ZDHHC14 (EC 2.3.1.-) (Zinc finger DHHC domain-containing protein 14) (DHHC-14) (NEW1 domain-containing protein) (NEW1CP) [MASS=53388] | 0.00 | 12.50 | 0.50 | 0.00 | 1 | 3 | 1<br>3<br>2           | MPPGGGGPMK<br>M[147]PPGGGGPMKDC[339]EYSQISTHSSSPMESPHK<br>DC[330]EYSQISTHSSSPM[147]ESPHKK                                   | 1<br>1<br>1           |

|                                                                                                                                                                          |      |      |      |      |   |   |                                                                                                                                                 |                                |   |
|--------------------------------------------------------------------------------------------------------------------------------------------------------------------------|------|------|------|------|---|---|-------------------------------------------------------------------------------------------------------------------------------------------------|--------------------------------|---|
| ZDHC7_HUMAN (Q9NXF8)<br>Palmitoyltransferase ZDHHC7 (EC 2.3.1.-)<br>(Zinc finger DHHC domain-containing protein 7)<br>(DHHC-7) (Zinc finger protein 370)<br>[MASS=35141] | 0.00 | 4.87 | *    | *    | * | 1 | 3                                                                                                                                               | M[147]DHHC[339]PWWNNC[330]VGEK | 1 |
| ZFHx2_HUMAN (Q9C0A1) Zinc finger<br>homeobox protein 2 [MASS=152100]                                                                                                     | 0.00 | 6.17 | 1.07 | 0.00 | 1 | 4 | 3 PFKC[339]TVC[339]RVSYNQSSTLEIHMR<br>3 KNAC[339]EGGSM[147]PTGGGTGGASGC[339]R<br>2 NAC[339]EGGSMPTGGGTGGASGC[339]RR<br>2 TAAKALLENFGFELVIQYNEGK | 1<br>1<br>1<br>1               |   |
| ZFP62_HUMAN (Q8NB50) Zinc finger protein<br>62 homolog (Zfp-62) [MASS=79143]                                                                                             | 0.00 | 7.78 | 0.64 | 0.00 | 1 | 4 | 2 NHKGIHLGEK<br>2 SSLKNHKGIHLGEK<br>3 SIHPGKKAHEC[339]K<br>3 C[330]DEC[330]EKSFNYSSLLIQHK                                                       | 1<br>1<br>1<br>1               |   |
| ZMYM3_HUMAN (Q14202) Zinc finger MYM-<br>type protein 3 (Zinc finger protein 261)<br>(DXS6673E protein) [MASS=152378]                                                    | *    | 1.39 | *    | *    | * | 2 | 3 GVVSQC[330]EHC[330]R<br>2 GVSC[330]KVEM[147]K                                                                                                 | 1<br>1                         |   |
| ZN133_HUMAN (P52736) Zinc finger protein<br>133 [MASS=73402]                                                                                                             | 0.00 | 7.95 | 1.51 | 0.00 | 1 | 3 | 2 SALITHKRAHSEEK<br>2 SHLTLHQM[147]THTGEKPYVC[339]K<br>2 SNLIIHQRTSHSGEKPYVC[330]R                                                              | 1<br>1<br>1                    |   |
| ZN217_HUMAN (O75362) Zinc finger protein<br>217 [MASS=115271]                                                                                                            | 0.00 | 8.87 | 1.51 | 0.00 | 1 | 4 | 2 TKADVTPPPDGGSTTHNLEVSPKEK<br>2 EKQTETAADC[339]R<br>3 PQQNVGVQGAATRQQQSEMFPKTSVSPAPDK<br>3 NC[330]KENEFSK[339]EVC[330]GQTFRVAFDVEIHM[147]R     | 1<br>1<br>1<br>1               |   |
| ZN256_HUMAN (Q9Y2P7) Zinc finger protein<br>256 (Bone marrow zinc finger 3) (BMZF-3)<br>[MASS=54872]                                                                     | *    | 1.90 | *    | *    | * | 1 | 2 PYM[147]C[330]SEC[339]GK                                                                                                                      | 1                              |   |
| ZN294_HUMAN (O94822) Zinc finger protein<br>294 [MASS=200534]                                                                                                            | *    | 2.77 | *    | *    | * | 2 | 3 LSEAESSDSSVSFIC[330]DVAYNYFSSAK<br>2 TAHNLENVLIHFWERLSEIC[330]VAK<br>3 VHC[339]EGEGGNAGDGGGVVPHR                                              | 1<br>1<br>3                    |   |
| ZN407_HUMAN (Q9C0G0) Zinc finger protein<br>407 (Fragment) [MASS=126979]                                                                                                 | 0.00 | 6.52 | 3.18 | 0.07 | 2 | 4 | 3 IRC[339]DDC[339]GFLADGLSGLNVHIAM[147]K<br>2 HLC[330]PVTLDGERSAESPVLVVTR<br>2 ERKFTC[339]HLC[339]DR                                            | 1<br>1<br>1                    |   |
| ZN441_HUMAN (Q8N8Z8) Zinc finger protein<br>441 [MASS=72193]                                                                                                             | 0.00 | 8.31 | 0.86 | 0.00 | 1 | 3 | 2 RHM[147]ITHTGNGPHK<br>2 DNSQC[330]GGPFTQTQDSIVNEK<br>3 AFDSPSLC[330]RRHETAHTGEK                                                               | 1<br>1<br>1                    |   |
| ZN473_HUMAN (Q8WTR7) Zinc finger protein<br>473 (Zinc finger protein 100 homolog) (Zfp-100)<br>[MASS=100182]                                                             | *    | 2.18 | *    | *    | * | 1 | 2 C[330]GEC[339]GKAFAQKANLTQHQR                                                                                                                 | 1                              |   |

|                                                                                                                                                                                                      |      |       |      |      |   |   |   |                                        |    |
|------------------------------------------------------------------------------------------------------------------------------------------------------------------------------------------------------|------|-------|------|------|---|---|---|----------------------------------------|----|
| ZN479_HUMAN (Q96JC4) Zinc finger protein 479 (Zinc finger protein Kr19) (HKr19) [MASS=60598]                                                                                                         | *    | 8.21  | *    | *    | * | 2 | 3 | YGKSF3[339]M[147]LSHLNQHQVIHTREK       | 1  |
|                                                                                                                                                                                                      |      |       |      |      |   |   | 3 | PYTC[339]JEEC[339]GKAFNC[330]SSTLMQHK  | 1  |
| ZN483_HUMAN (Q8TF39) Zinc finger protein 483 [MASS=85097]                                                                                                                                            | *    | 1.08  | *    | *    | * | 1 | 2 | LDESALDK                               | 1  |
| ZN510_HUMAN (Q9Y2H8) Zinc finger protein 510 [MASS=79142]                                                                                                                                            | 0.00 | 3.07  | 1.38 | 0.00 | 1 | 2 | 2 | SNLRIHQ                                | 1  |
|                                                                                                                                                                                                      |      |       |      |      |   |   | 2 | IGKAFNDKANC[339]VK                     | 1  |
| ZN511_HUMAN (Q8NB15) Zinc finger protein 511 [MASS=29428]                                                                                                                                            | 0.00 | 8.78  | 0.86 | 0.00 | 1 | 1 | 3 | SEGEAM[147]EIC[339]SEPVAASPAPAGER      | 1  |
| ZN559_HUMAN (Q9BR84) Zinc finger protein 559 [MASS=62317]                                                                                                                                            | 0.00 | 3.53  | 1.93 | 0.00 | 1 | 2 | 2 | AFTDSSGLIK                             | 1  |
|                                                                                                                                                                                                      |      |       |      |      |   |   | 3 | HYVC[339]NEC[339]GK                    | 1  |
| ZN561_HUMAN (Q8N587) Zinc finger protein 561 [MASS=55197]                                                                                                                                            | 0.00 | 14.81 | 1.76 | 0.00 | 1 | 4 | 2 | NC[339]GEVFREQFC[339]LKTHMR            | 1  |
|                                                                                                                                                                                                      |      |       |      |      |   |   | 3 | VQNGGNTSEGNC[339]YGK                   | 1  |
|                                                                                                                                                                                                      |      |       |      |      |   |   | 2 | EC[330]GKAFTTSTSLIQHTR                 | 1  |
|                                                                                                                                                                                                      |      |       |      |      |   |   | 2 | EC[339]GKGFKYFASLDNHM[147]GIHTDEK      | 1  |
| ZN563_HUMAN (Q8TA94) Zinc finger protein 563 [MASS=55434]                                                                                                                                            | *    | 6.09  | *    | *    | * | 2 | 3 | NLYRYVM[147]QETIR                      | 1  |
|                                                                                                                                                                                                      |      |       |      |      |   |   | 3 | PHEYQEYGEKPHTHKQR                      | 1  |
| ZN575_HUMAN (Q86XF7) Zinc finger protein 575 [MASS=26763]                                                                                                                                            | *    | 24.90 | *    | *    | * | 3 | 3 | PSQSAPGPTASAGSPRPR                     | 1  |
|                                                                                                                                                                                                      |      |       |      |      |   |   | 3 | PSQSAPGPTASAGSPR                       | 1  |
|                                                                                                                                                                                                      |      |       |      |      |   |   | 2 | MLERGAESAAGATDPSPTGKEPVTK              | 1  |
|                                                                                                                                                                                                      |      |       |      |      |   |   | 3 | VFSC[339]GSTLETHK                      | 11 |
| ZN600_HUMAN (Q6ZNG1) Zinc finger protein 600 [MASS=83157]                                                                                                                                            | 0.00 | 1.66  | 6.13 | 0.00 | 1 | 1 |   |                                        |    |
| ZN638_HUMAN (Q14966) Zinc finger protein 638 (Nuclear protein 220) (Zinc-finger matrix-like protein) (Cutaneous T-cell lymphoma-associated antigen se33-1) (CTCL tumor antigen se33-1) [MASS=220623] | 0.64 | 2.78  | 0.96 | 0.00 | 1 | 2 | 3 | GIPHRFAGHESYQNM[147]GPQRM[147]NVQVTQHR | 1  |
|                                                                                                                                                                                                      |      |       |      |      |   |   | 3 | KEQSLHYGSVLLITELPEDGC[330]TEEDVR       | 1  |
| ZN639_HUMAN (Q9UID6) Zinc finger protein 639 (Zinc finger protein ZASC1) (Zinc finger protein ANC_2H01) [MASS=56054]                                                                                 | *    | 4.54  | *    | *    | * | 1 | 2 | DDSDTETSNDLPKFADGIKAR                  | 1  |

|                                                                                                                                                   |      |      |      |      |   |   |                                                                                                                                           |                        |   |
|---------------------------------------------------------------------------------------------------------------------------------------------------|------|------|------|------|---|---|-------------------------------------------------------------------------------------------------------------------------------------------|------------------------|---|
| ZN655_HUMAN (Q8N720) Zinc finger protein 655 (Vav-interacting Krueppel-like protein) [MASS=57393]                                                 | *    | 3.46 | *    | *    | * | 1 | 3                                                                                                                                         | SVHLTQHQQIHKEMPC[330]K | 1 |
| ZN690_HUMAN (Q8IWY8) Zinc finger protein 690 [MASS=96587]                                                                                         | 0.00 | 5.76 | 1.28 | 0.00 | 1 | 2 | 3 VAAPPNDGQEETASC[339]PVVQGTSEAEAQK<br>2 APVLFQSPRGFEAGFENEDNSK                                                                           | 1<br>1                 |   |
| ZN708_HUMAN (P17019) Zinc finger protein 708 (Zinc finger protein 15-like 1) (Zinc finger protein KOX8) [MASS=64779]                              | *    | 2.49 | *    | *    | * | 1 | 2 EC[330]GKAFNQSSTLM[147]K                                                                                                                | 1                      |   |
| ZNF18_HUMAN (P17022) Zinc finger protein 18 (Zinc finger protein KOX11) (Heart development-specific gene 1 protein) [MASS=62288]                  | *    | 2.73 | *    | *    | * | 1 | 3 QFRYQVMSSGPHETLK                                                                                                                        | 1                      |   |
| ZNF20_HUMAN (P17024) Zinc finger protein 20 (Zinc finger protein KOX13) [MASS=61567]                                                              | *    | 7.14 | *    | *    | * | 2 | 3 C[339]ASQLQIHERTHSGEKPHEC[339]K<br>3 PYEC[339]KHC[339]GKAFISNYIR                                                                        | 1<br>1                 |   |
| ZNF30_HUMAN (P17039) Zinc finger protein 30 (Zinc finger protein KOX28) [MASS=62123]                                                              | *    | 3.87 | *    | *    | * | 1 | 2 LSSFLHAHQRIHAEIKPYGC[330]K                                                                                                              | 1                      |   |
| ZNF38_HUMAN (P17036) Zinc finger protein 38 (Zinc finger protein KOX25) (Zinc finger protein HF.12) (Zinc finger protein 3) (HZF3.1) [MASS=50916] | 0.00 | 2.69 | 0.61 | 0.00 | 1 | 1 | 3 TFSC[330]SSALILHR                                                                                                                       | 1                      |   |
| ZNF6_HUMAN (Q9Y462) Zinc finger protein 6 [MASS=87209]                                                                                            | 0.59 | 4.93 | 1.12 | 0.00 | 1 | 3 | 3 KVSFHNHLESHK<br>2 YC[339]DYETAEQGLLNR<br>3 HM[147]KNHPDHLMRK                                                                            | 1<br>1<br>1            |   |
| ZNF85_HUMAN (Q03923) Zinc finger protein 85 (Zinc finger protein HPF4) (HTF1) [MASS=68718]                                                        | *    | 2.02 | *    | *    | * | 1 | 2 IHTGEKPYEC[330]JEK                                                                                                                      | 1                      |   |
| ZNF92_HUMAN (Q03936) Zinc finger protein 92 (Zinc finger protein HTF12) [MASS=68486]                                                              | 0.00 | 6.31 | 9.09 | 0.00 | 1 | 3 | 3 AFNQSSTLTKHKR<br>3 C[339]GNAFNQSSNLTR<br>2 RNHM[147]EDKPYK                                                                              | 1<br>1<br>1            |   |
| ZNFX1_HUMAN (Q9P2E3) NFX1-type zinc finger-containing protein 1 [MASS=220225]                                                                     | 0.00 | 5.42 | 1.59 | 0.00 | 1 | 5 | 2 SNQEGKVGFLQISNR<br>2 FLESLQKDPSEVVITLATSGLK<br>2 PSANVYDLAKNFNLEVSLFER<br>3 EPRYLLM[147]GGRYDFTPLIENPSATGEFLR<br>2 NGHIVIGDC[330]GGAMER | 1<br>1<br>1<br>1<br>1  |   |
| ZNT1_HUMAN (Q9Y6M5) Zinc transporter 1 (ZnT-1) (Solute carrier family 30 member 1) [MASS=55328]                                                   | 0.00 | 4.54 | 1.78 | 0.00 | 1 | 1 | 3 TQC[330]ALKQC[330]C[330]GTLQPAPSGKDAEK                                                                                                  | 1                      |   |

|                                                                                                 |      |       |      |      |   |   |   |                                             |   |
|-------------------------------------------------------------------------------------------------|------|-------|------|------|---|---|---|---------------------------------------------|---|
| ZNT3_HUMAN (Q99726) Zinc transporter 3 (ZnT-3) (Solute carrier family 30 member 3) [MASS=41944] | 1.00 | 15.46 | 0.69 | 0.09 | 3 | 3 | 2 | DTLLSVPGVR                                  | 1 |
|                                                                                                 |      |       |      |      |   |   | 2 | AADPISTFLFSIC[330]ALGSTAPTLR                | 2 |
|                                                                                                 |      |       |      |      |   |   | 3 | AADPISTFLFSIC[330]ALGSTAPTLRDVLR            | 1 |
| ZSWM2_HUMAN (Q8NEG5) Zinc finger SWIM domain-containing protein 2 [MASS=72720]                  | 0.00 | 15.32 | 1.07 | 0.43 | 2 | 6 | 2 | SLEKRADEVVK                                 | 1 |
|                                                                                                 |      |       |      |      |   |   | 2 | HIC[339]WVLLKKFELPR                         | 1 |
|                                                                                                 |      |       |      |      |   |   | 2 | RADEVVKYIDTK                                | 1 |
|                                                                                                 |      |       |      |      |   |   | 2 | RYSNC[330]MGEITR                            | 1 |
|                                                                                                 |      |       |      |      |   |   | 3 | C[330]IDNWL FHKC[330]NSC[339]PIGGQVIYNPLTWK | 1 |
|                                                                                                 |      |       |      |      |   |   | 3 | LGILPSIPQC[339]NFDELNTPQSPK                 | 1 |
| ZXDA_HUMAN (P98168) Zinc finger X-linked protein ZXDA [MASS=84770]                              | *    | 7.63  | *    | *    | * | 3 | 3 | IHLRSHTGERPFLC[339]DFDGC[330]GWNFTSMSK      | 1 |
|                                                                                                 |      |       |      |      |   |   | 3 | HDDDRRFM[147]C[339]PVEGC[330]GK             | 1 |
|                                                                                                 |      |       |      |      |   |   | 2 | HQLKM[147]HLLTHSSSQGQR                      | 1 |
| ZXDB_HUMAN (P98169) Zinc finger X-linked protein ZXDB [MASS=84792]                              | *    | 3.36  | *    | *    | * | 1 | 3 | EEAEEGGLQGEGGANPAGPTALGPR                   | 1 |

**Table 6. EAD Mitochondrial Study  
Protein Summary**

| Description                                                                                                                                                                                                                    | Experiment1   |                  | Experiment2   |                  | Experiment3   |                  | Count | Mean | SEM  |
|--------------------------------------------------------------------------------------------------------------------------------------------------------------------------------------------------------------------------------|---------------|------------------|---------------|------------------|---------------|------------------|-------|------|------|
|                                                                                                                                                                                                                                | Protein Score | XPress H2L Ratio | Protein Score | XPress H2L Ratio | Protein Score | XPress H2L Ratio |       |      |      |
| 1433G_HUMAN (P61981) 14-3-3 protein gamma (Protein kinase C inhibitor protein 1) (KCIP-1) [MASS=28171]                                                                                                                         | 1.00          | 1.07             | 1.00          | 1.04             | 1.00          | 0.89             | 3.00  | 1.00 | 0.06 |
| AATM_HUMAN (P00505) Aspartate aminotransferase, mitochondrial precursor (EC 2.6.1.1) (Transaminase A) (Glutamate oxaloacetate transaminase 2) [MASS=47475]                                                                     | 1.00          | 1.55             | 1.00          | 1.69             | 1.00          | 1.85             | 3.00  | 1.70 | 0.09 |
| ACTB_HUMAN (P60709) Actin, cytoplasmic 1 (Beta-actin) [MASS=41736]                                                                                                                                                             | 1.00          | 0.61             | 0.00          | 0.92             | 1.00          | 0.73             | 3.00  | 0.75 | 0.09 |
| ADT1_HUMAN (P12235) ADP/ATP translocase 1 (Adenine nucleotide translocator 1) (ANT 1) (ADP,ATP carrier protein 1) (Solute carrier family 25 member 4) (ADP,ATP carrier protein, heart/skeletal muscle isoform T1) [MASS=32933] | 1.00          | 1.86             | 1.00          | 1.83             | 1.00          | 1.69             | 3.00  | 1.79 | 0.05 |
| ADT2_HUMAN (P05141) ADP/ATP translocase 2 (Adenine nucleotide translocator 2) (ANT 2) (ADP,ATP carrier protein 2) (Solute carrier family 25 member 5) (ADP,ATP carrier protein, fibroblast isoform) [MASS=32764]               | 1.00          | 0.05             | 0.33          | 2.60             | 1.00          | 0.44             | 3.00  | 1.03 | 0.79 |
| ALDH2_HUMAN (P05091) Aldehyde dehydrogenase, mitochondrial precursor (EC 1.2.1.3) (ALDH class 2) (ALDH1) (ALDH-E2) [MASS=56381]                                                                                                | 1.00          | 1.49             | 0.89          | 1.81             | 1.00          | 1.31             | 3.00  | 1.54 | 0.15 |
| AT131_HUMAN (Q9HD20) Probable cation-transporting ATPase 13A1 (EC 3.6.3.-) [MASS=132954]                                                                                                                                       | 0.00          | 1.61             | 0.00          | 0.42             | 0.00          | 1.08             | 3.00  | 1.04 | 0.34 |
| AT1A3_HUMAN (P13637) Sodium/potassium-transporting ATPase alpha-3 chain (EC 3.6.3.9) (Sodium pump 3) (Na+/K+ ATPase 3) (Alpha(III)) [MASS=111734]                                                                              | 1.00          | 0.54             | 1.00          | 0.59             | 1.00          | 0.51             | 3.00  | 0.55 | 0.02 |
| AT1B1_HUMAN (P05026) Sodium/potassium-transporting ATPase subunit beta-1 (Sodium/potassium-dependent ATPase beta-1 subunit) [MASS=35061]                                                                                       | 1.00          | 0.53             | 0.45          | 0.54             | 1.00          | 0.53             | 3.00  | 0.53 | 0.00 |
| ATPG_HUMAN (P36542) ATP synthase gamma chain, mitochondrial precursor (EC 3.6.3.14) [MASS=32996]                                                                                                                               | 1.00          | 1.87             | 1.00          | 2.09             | 1.00          | 1.88             | 3.00  | 1.95 | 0.07 |

|                                                                                                                                                                                                                                                                              |      |      |      |      |      |      |             |             |             |
|------------------------------------------------------------------------------------------------------------------------------------------------------------------------------------------------------------------------------------------------------------------------------|------|------|------|------|------|------|-------------|-------------|-------------|
| C560_HUMAN (Q99643) Succinate dehydrogenase cytochrome b560 subunit, mitochondrial precursor (Integral membrane protein CII-3) (QPs1) (QPs-1) (Succinate dehydrogenase complex subunit C) (Succinate-ubiquinone oxidoreductase cytochrome B large subunit) (CY [MASS=18610]) | 1.00 | 1.31 | 0.75 | 1.45 | 1.00 | 1.58 | <b>3.00</b> | <b>1.45</b> | <b>0.08</b> |
| CD81_HUMAN (P60033) CD81 antigen (26 kDa cell surface protein TAPA-1) (Target of the antiproliferative antibody 1) (Tetraspanin-28) (Tspan-28) [MASS=25809]                                                                                                                  | 0.99 | 0.56 | 0.76 | 0.55 | 1.00 | 0.46 | <b>3.00</b> | <b>0.52</b> | <b>0.03</b> |
| CH60_HUMAN (P10809) 60 kDa heat shock protein, mitochondrial precursor (Hsp60) (60 kDa chaperonin) (CPN60) (Heat shock protein 60) (HSP-60) (Mitochondrial matrix protein P1) (P60 lymphocyte protein) (HuCHA60) [MASS=61054]                                                | 1.00 | 1.72 | 1.00 | 1.48 | 1.00 | 1.82 | <b>3.00</b> | <b>1.67</b> | <b>0.10</b> |
| CISY_HUMAN (O75390) Citrate synthase, mitochondrial precursor (EC 2.3.3.1) [MASS=51712]                                                                                                                                                                                      | 1.00 | 1.46 | 0.00 | 2.06 | 1.00 | 1.56 | <b>3.00</b> | <b>1.69</b> | <b>0.19</b> |
| CJ070_HUMAN (Q9NZ45) Protein C10orf70 [MASS=12199]                                                                                                                                                                                                                           | 1.00 | 1.63 | 0.62 | 1.38 | 1.00 | 1.81 | <b>3.00</b> | <b>1.61</b> | <b>0.12</b> |
| CMC1_HUMAN (O75746) Calcium-binding mitochondrial carrier protein Aralar1 (Mitochondrial aspartate glutamate carrier 1) (Solute carrier family 25 member 12) [MASS=74755]                                                                                                    | 1.00 | 1.15 | 1.00 | 1.48 | 1.00 | 1.66 | <b>3.00</b> | <b>1.43</b> | <b>0.15</b> |
| CN37_HUMAN (P09543) 2',3'-cyclic-nucleotide 3'-phosphodiesterase (EC 3.1.4.37) (CNP) (CNPase) [MASS=47578]                                                                                                                                                                   | 1.00 | 0.92 | 1.00 | 0.97 | 1.00 | 1.03 | <b>3.00</b> | <b>0.97</b> | <b>0.03</b> |
| CRTC_HUMAN (P27797) Calreticulin precursor (CRP55) (Calregulin) (HACBP) (ERp60) (grp60) [MASS=48141]                                                                                                                                                                         | 1.00 | 1.36 | 0.41 | 1.79 | 1.00 | 1.07 | <b>3.00</b> | <b>1.41</b> | <b>0.21</b> |
| CY1_HUMAN (P08574) Cytochrome c1, heme protein, mitochondrial precursor (Cytochrome c-1) [MASS=35390]                                                                                                                                                                        | 1.00 | 2.16 | 1.00 | 1.58 | 1.00 | 1.69 | <b>3.00</b> | <b>1.81</b> | <b>0.18</b> |
| DHE3_HUMAN (P00367) Glutamate dehydrogenase 1, mitochondrial precursor (EC 1.4.1.3) (GDH) [MASS=61397]                                                                                                                                                                       | 1.00 | 1.72 | 1.00 | 1.44 | 1.00 | 1.67 | <b>3.00</b> | <b>1.61</b> | <b>0.09</b> |
| DHSA_HUMAN (P31040) Succinate dehydrogenase [ubiquinone] flavoprotein subunit, mitochondrial precursor (EC 1.3.5.1) (Fp) (Flavoprotein subunit of complex II) [MASS=72691]                                                                                                   | 1.00 | 1.57 | 1.00 | 1.20 | 1.00 | 1.34 | <b>3.00</b> | <b>1.37</b> | <b>0.11</b> |
| DHSB_HUMAN (P21912) Succinate dehydrogenase [ubiquinone] iron-sulfur protein, mitochondrial precursor (EC 1.3.5.1) (Ip) (Iron-sulfur subunit of complex II) [MASS=31630]                                                                                                     | 1.00 | 1.92 | 0.66 | 1.75 | 1.00 | 1.70 | <b>3.00</b> | <b>1.79</b> | <b>0.07</b> |
| DLDH_HUMAN (P09622) Dihydrolipoyl dehydrogenase, mitochondrial precursor (EC 1.8.1.4) (Dihydrolipoamide dehydrogenase) (Glycine cleavage system L protein) [MASS=54150]                                                                                                      | 1.00 | 1.55 | 1.00 | 1.16 | 1.00 | 1.77 | <b>3.00</b> | <b>1.49</b> | <b>0.18</b> |
| DPYL2_HUMAN (Q16555) Dihydropyrimidinase-related protein 2 (DRP-2) (Collapsin response mediator protein 2) (CRMP-2) (N2A3) [MASS=62293]                                                                                                                                      | 1.00 | 0.65 | 1.00 | 0.58 | 1.00 | 0.60 | <b>3.00</b> | <b>0.61</b> | <b>0.02</b> |

|                                                                                                                                                                                                                                                                             |      |       |      |       |      |       |             |              |             |
|-----------------------------------------------------------------------------------------------------------------------------------------------------------------------------------------------------------------------------------------------------------------------------|------|-------|------|-------|------|-------|-------------|--------------|-------------|
| ECHM_HUMAN (P30084) Enoyl-CoA hydratase, mitochondrial precursor (EC 4.2.1.17) (Short chain enoyl-CoA hydratase) (SCEH) (Enoyl-CoA hydratase 1) [MASS=31387]                                                                                                                | 0.94 | 1.76  | 1.00 | 1.88  | 1.00 | 2.22  | <b>3.00</b> | <b>1.95</b>  | <b>0.14</b> |
| EF1A1_HUMAN (P68104) Elongation factor 1-alpha 1 (EF-1-alpha-1) (Elongation factor 1 A-1) (eEF1A-1) (Elongation factor Tu) (EF-Tu) [MASS=50141]                                                                                                                             | 0.99 | 2.50  | 0.66 | 1.04  | 1.00 | 0.65  | <b>3.00</b> | <b>1.40</b>  | <b>0.56</b> |
| ETFD_HUMAN (Q16134) Electron transfer flavoprotein-ubiquinone oxidoreductase, mitochondrial precursor (EC 1.5.5.1) (ETF-QO) (ETF-ubiquinone oxidoreductase) (ETF dehydrogenase) (Electron-transferring-flavoprotein dehydrogenase) [MASS=68507]                             | 0.94 | 2.29  | 0.00 | 1.66  | 0.91 | 1.94  | <b>3.00</b> | <b>1.96</b>  | <b>0.18</b> |
| G3P_HUMAN (P04406) Glyceraldehyde-3-phosphate dehydrogenase (EC 1.2.1.12) (GAPDH) [MASS=35922]                                                                                                                                                                              | 1.00 | 0.68  | 0.33 | 0.84  | 1.00 | 0.72  | <b>3.00</b> | <b>0.75</b>  | <b>0.05</b> |
| GABT_HUMAN (P80404) 4-aminobutyrate aminotransferase, mitochondrial precursor (EC 2.6.1.19) ((S)-3-amino-2-methylpropionate transaminase) (EC 2.6.1.22) (Gamma-amino-N-butyrate transaminase) (GABA transaminase) (GABA aminotransferase) (GABA-AT) (GABA-T) ( [MASS=56439] | 0.99 | 1.31  | 0.95 | 1.62  | 1.00 | 0.89  | <b>3.00</b> | <b>1.27</b>  | <b>0.21</b> |
| GBB1_HUMAN (P62873) Guanine nucleotide-binding protein G(I)/G(S)/G(T) subunit beta 1 (Transducin beta chain 1) [MASS=37246]                                                                                                                                                 | 1.00 | 0.60  | 1.00 | 0.55  | 1.00 | 0.58  | <b>3.00</b> | <b>0.58</b>  | <b>0.01</b> |
| GBG3_HUMAN (P63215) Guanine nucleotide-binding protein G(I)/G(S)/G(O) gamma-3 subunit precursor [MASS=8305]                                                                                                                                                                 | 1.00 | 0.80  | 0.67 | 0.90  | 1.00 | 0.60  | <b>3.00</b> | <b>0.77</b>  | <b>0.09</b> |
| GHC1_HUMAN (Q9H936) Mitochondrial glutamate carrier 1 (GC-1) (Glutamate/H(+) symporter 1) (Solute carrier family 25 member 22) [MASS=34470]                                                                                                                                 | 1.00 | 1.24  | 1.00 | 1.22  | 1.00 | 1.30  | <b>3.00</b> | <b>1.25</b>  | <b>0.02</b> |
| GLSK_HUMAN (O94925) Glutaminase kidney isoform, mitochondrial precursor (EC 3.5.1.2) (GLS) (L-glutamine amidohydrolase) (K-glutaminase) [MASS=73461]                                                                                                                        | 1.00 | 1.45  | 1.00 | 1.56  | 1.00 | 1.83  | <b>3.00</b> | <b>1.61</b>  | <b>0.11</b> |
| HXK1_HUMAN (P19367) Hexokinase-1 (EC 2.7.1.1) (Hexokinase type I) (HK I) (Brain form hexokinase) [MASS=102484]                                                                                                                                                              | 1.00 | 1.40  | 1.00 | 1.69  | 1.00 | 1.74  | <b>3.00</b> | <b>1.61</b>  | <b>0.11</b> |
| IDH3A_HUMAN (P50213) Isocitrate dehydrogenase [NAD] subunit alpha, mitochondrial precursor (EC 1.1.1.41) (Isocitric dehydrogenase) (NAD(+)-specific ICDH) [MASS=39591]                                                                                                      | 0.27 | 1.31  | 1.00 | 0.93  | 1.00 | 1.55  | <b>3.00</b> | <b>1.26</b>  | <b>0.18</b> |
| IDHP_HUMAN (P48735) Isocitrate dehydrogenase [NADP], mitochondrial precursor (EC 1.1.1.42) (Oxalosuccinate decarboxylase) (IDH) (NADP(+)-specific ICDH) (IDP) (ICD-M) [MASS=50909]                                                                                          | 1.00 | 1.36  | 1.00 | 1.58  | 1.00 | 1.38  | <b>3.00</b> | <b>1.44</b>  | <b>0.07</b> |
| INT10_HUMAN (Q9NVR2) Integrator complex subunit 10 (Int10) [MASS=82235]                                                                                                                                                                                                     | 0.00 | 0.57  | 0.00 | 1.95  | 0.00 | 1.08  | <b>3.00</b> | <b>1.20</b>  | <b>0.40</b> |
| K0196_HUMAN (Q12768) Protein KIAA0196 [MASS=134286]                                                                                                                                                                                                                         | 0.00 | 32.92 | 0.00 | 24.57 | 0.00 | 37.41 | <b>3.00</b> | <b>31.63</b> | <b>3.76</b> |



|                                                                                                                                                                                                                                                        |      |      |      |      |      |      |             |             |             |
|--------------------------------------------------------------------------------------------------------------------------------------------------------------------------------------------------------------------------------------------------------|------|------|------|------|------|------|-------------|-------------|-------------|
| KCC2B_HUMAN (Q13554) Calcium/calmodulin-dependent protein kinase type II beta chain (EC 2.7.11.17) (CaM-kinase II beta chain) (CaM kinase II subunit beta) (CaMK-II subunit beta) [MASS=72726]                                                         | 1.00 | 1.02 | 1.00 | 0.82 | 1.00 | 0.89 | <b>3.00</b> | <b>0.91</b> | <b>0.06</b> |
| KCRB_HUMAN (P12277) Creatine kinase B-type (EC 2.7.3.2) (Creatine kinase B chain) (B-CK) [MASS=42644]                                                                                                                                                  | 1.00 | 0.73 | 1.00 | 0.75 | 1.00 | 0.76 | <b>3.00</b> | <b>0.75</b> | <b>0.01</b> |
| KCRU_HUMAN (P12532) Creatine kinase, ubiquitous mitochondrial precursor (EC 2.7.3.2) (U-MtCK) (Mia-CK) (Acidic-type mitochondrial creatine kinase) [MASS=47036]                                                                                        | 1.00 | 1.58 | 0.99 | 1.14 | 1.00 | 1.82 | <b>3.00</b> | <b>1.51</b> | <b>0.20</b> |
| KPYM_HUMAN (P14618) Pyruvate kinase isozymes M1/M2 (EC 2.7.1.40) (Pyruvate kinase muscle isozyme) (Cytosolic thyroid hormone-binding protein) (CTHBP) (THBP1) [MASS=57805]                                                                             | 1.00 | 0.70 | 0.63 | 0.57 | 1.00 | 0.74 | <b>3.00</b> | <b>0.67</b> | <b>0.05</b> |
| LEG1_HUMAN (P09382) Galectin-1 (Lectin galactoside-binding soluble 1) (Beta-galactoside-binding lectin L-14-I) (Lactose-binding lectin 1) (S-Lac lectin 1) (Galaptin) (14 kDa lectin) (HPL) (HBL) (Putative MAPK-activating protein MP12) [MASS=14584] | 1.00 | 0.86 | 0.92 | 0.69 | 0.98 | 0.68 | <b>3.00</b> | <b>0.74</b> | <b>0.06</b> |
| LPPRC_HUMAN (P42704) 130 kDa leucine-rich protein (LRP 130) (GP130) (Leucine-rich PPR motif-containing protein) [MASS=145200]                                                                                                                          | 0.00 | 1.41 | 0.98 | 1.51 | 0.99 | 1.05 | <b>3.00</b> | <b>1.32</b> | <b>0.14</b> |
| MDHC_HUMAN (P40925) Malate dehydrogenase, cytoplasmic (EC 1.1.1.37) (Cytosolic malate dehydrogenase) [MASS=36295]                                                                                                                                      | 0.65 | 0.53 | 0.85 | 0.91 | 1.00 | 0.74 | <b>3.00</b> | <b>0.73</b> | <b>0.11</b> |
| MDHM_HUMAN (P40926) Malate dehydrogenase, mitochondrial precursor (EC 1.1.1.37) [MASS=35531]                                                                                                                                                           | 1.00 | 1.62 | 1.00 | 1.94 | 1.00 | 1.82 | <b>3.00</b> | <b>1.79</b> | <b>0.09</b> |
| MGST3_HUMAN (O14880) Microsomal glutathione S-transferase 3 (EC 2.5.1.18) (Microsomal GST-3) (Microsomal GST-III) [MASS=16516]                                                                                                                         | 1.00 | 1.56 | 1.00 | 1.75 | 1.00 | 1.81 | <b>3.00</b> | <b>1.71</b> | <b>0.08</b> |
| MYPR_HUMAN (P60201) Myelin proteolipid protein (PLP) (Lipophilin) [MASS=29946]                                                                                                                                                                         | 1.00 | 1.35 | 1.00 | 1.77 | 1.00 | 1.34 | <b>3.00</b> | <b>1.49</b> | <b>0.14</b> |
| NDRG2_HUMAN (Q9UN36) Protein NDRG2 (Protein Syld709613) [MASS=40798]                                                                                                                                                                                   | 1.00 | 0.64 | 1.00 | 0.51 | 1.00 | 0.78 | <b>3.00</b> | <b>0.64</b> | <b>0.08</b> |
| NDUA8_HUMAN (P51970) NADH dehydrogenase [ubiquinone] 1 alpha subcomplex subunit 8 (EC 1.6.5.3) (EC 1.6.99.3) (NADH-ubiquinone oxidoreductase 19 kDa subunit) (Complex I-19KD) (CI-19KD) (Complex I-PGIV) (CI-PGIV) [MASS=19974]                        | 1.00 | 1.82 | 1.00 | 2.40 | 1.00 | 1.66 | <b>3.00</b> | <b>1.96</b> | <b>0.22</b> |
| NDUAA_HUMAN (O95299) NADH dehydrogenase [ubiquinone] 1 alpha subcomplex subunit 10, mitochondrial precursor (EC 1.6.5.3) (EC 1.6.99.3) (NADH-ubiquinone oxidoreductase 42 kDa subunit) (Complex I-42KD) (CI-42KD) [MASS=40750]                         | 1.00 | 1.12 | 0.71 | 1.43 | 1.00 | 1.64 | <b>3.00</b> | <b>1.40</b> | <b>0.15</b> |

|                                                                                                                                                                                                                                                                             |      |      |      |      |      |      |             |             |             |
|-----------------------------------------------------------------------------------------------------------------------------------------------------------------------------------------------------------------------------------------------------------------------------|------|------|------|------|------|------|-------------|-------------|-------------|
| NDUBA_HUMAN (O96000) NADH dehydrogenase [ubiquinone] 1 beta subcomplex subunit 10 (EC 1.6.5.3) (EC 1.6.99.3) (NADH-ubiquinone oxidoreductase PDSW subunit) (Complex I-PDSW) (CI-PDSW) [MASS=20645]                                                                          | 0.99 | 1.85 | 0.83 | 1.68 | 1.00 | 1.72 | <b>3.00</b> | <b>1.75</b> | <b>0.05</b> |
| NIP51_HUMAN (Q9BPW8) Protein NipSnap1 [MASS=33310]                                                                                                                                                                                                                          | 0.94 | 1.63 | 0.23 | 1.24 | 0.41 | 0.70 | <b>3.00</b> | <b>1.19</b> | <b>0.27</b> |
| NUAM_HUMAN (P28331) NADH-ubiquinone oxidoreductase 75 kDa subunit, mitochondrial precursor (EC 1.6.5.3) (EC 1.6.99.3) (Complex I-75Kd) (CI-75Kd) [MASS=79467]                                                                                                               | 1.00 | 1.23 | 1.00 | 1.39 | 1.00 | 1.73 | <b>3.00</b> | <b>1.45</b> | <b>0.15</b> |
| NUBM_HUMAN (P49821) NADH-ubiquinone oxidoreductase 51 kDa subunit, mitochondrial precursor (EC 1.6.5.3) (EC 1.6.99.3) (Complex I-51KD) (CI-51KD) (NADH dehydrogenase flavoprotein 1) [MASS=50817]                                                                           | 1.00 | 1.54 | 1.00 | 1.64 | 1.00 | 1.17 | <b>3.00</b> | <b>1.45</b> | <b>0.14</b> |
| NUMM_HUMAN (O75380) NADH-ubiquinone oxidoreductase 13 kDa-A subunit, mitochondrial precursor (EC 1.6.5.3) (EC 1.6.99.3) (Complex I-13KD-A) (CI-13KD-A) [MASS=13712]                                                                                                         | 1.00 | 1.31 | 0.91 | 1.59 | 1.00 | 1.44 | <b>3.00</b> | <b>1.45</b> | <b>0.08</b> |
| ODP2_HUMAN (P10515) Dihydrolipoalysine-residue acetyltransferase component of pyruvate dehydrogenase complex, mitochondrial precursor (EC 2.3.1.12) (Pyruvate dehydrogenase complex E2 subunit) (PDCE2) (E2) (Dihydrolipoamide S-acetyltransferase component) [MASS=65781]  | 0.60 | 1.45 | 0.00 | 1.05 | 1.00 | 1.50 | <b>3.00</b> | <b>1.33</b> | <b>0.14</b> |
| ODPA_HUMAN (P08559) Pyruvate dehydrogenase E1 component alpha subunit, somatic form, mitochondrial precursor (EC 1.2.4.1) (PDHE1-A type I) [MASS=43295]                                                                                                                     | 1.00 | 1.54 | 0.00 | 1.45 | 1.00 | 1.77 | <b>3.00</b> | <b>1.59</b> | <b>0.10</b> |
| OPA1_HUMAN (O60313) Dynamin-like 120 kDa protein, mitochondrial precursor (Optic atrophy 1 gene protein) [MASS=111657]                                                                                                                                                      | 1.00 | 1.31 | 0.00 | 1.06 | 1.00 | 1.68 | <b>3.00</b> | <b>1.35</b> | <b>0.18</b> |
| RHOB_HUMAN (P62745) Rho-related GTP-binding protein RhoB precursor (H6) [MASS=22123]                                                                                                                                                                                        | 0.96 | 0.71 | 0.60 | 0.62 | 1.00 | 0.61 | <b>3.00</b> | <b>0.65</b> | <b>0.03</b> |
| SAP_HUMAN (P07602) Proactivator polypeptide precursor [Contains: Saposin A (Protein A); Saposin B-Val; Saposin B (Sphingolipid activator protein 1) (SAP-1) (Cerebroside sulfate activator) (CSAct) (Dispersin) (Sulfatide/GM1 activator); Saposin C (Co-beta- [MASS=58112] | 1.00 | 1.02 | 1.00 | 2.26 | 1.00 | 1.72 | <b>3.00</b> | <b>1.67</b> | <b>0.36</b> |
| SCOT_HUMAN (P55809) Succinyl-CoA:3-ketoacid-coenzyme A transferase 1, mitochondrial precursor (EC 2.8.3.5) (Somatic-type succinyl CoA:3-oxoacid CoA-transferase) (Scot-S) [MASS=56157]                                                                                      | 1.00 | 1.34 | 0.36 | 2.02 | 1.00 | 1.63 | <b>3.00</b> | <b>1.66</b> | <b>0.20</b> |

|                                                                                                                                                                                                                                                                             |      |      |      |      |      |      |             |             |             |
|-----------------------------------------------------------------------------------------------------------------------------------------------------------------------------------------------------------------------------------------------------------------------------|------|------|------|------|------|------|-------------|-------------|-------------|
| SHPS1_HUMAN (P78324) Tyrosine-protein phosphatase non-receptor type substrate 1 precursor (SHP substrate 1) (SHPS-1) (Inhibitory receptor SHPS-1) (Signal-regulatory protein alpha-1) (Sirp-alpha-1) (Sirp-alpha-2) (Sirp-alpha-3) (MyD-1 antigen) (Brain Ig-I [MASS=54812] | 1.00 | 0.45 | 1.00 | 0.51 | 1.00 | 0.35 | <b>3.00</b> | <b>0.44</b> | <b>0.05</b> |
| STXB1_HUMAN (P61764) Syntaxin-binding protein 1 (Unc-18 homolog) (Unc-18A) (Unc-18-1) (N-Sec1) (p67) [MASS=67568]                                                                                                                                                           | 1.00 | 0.62 | 0.97 | 0.60 | 1.00 | 0.66 | <b>3.00</b> | <b>0.63</b> | <b>0.02</b> |
| SYPH_HUMAN (P08247) Synaptophysin (Major synaptic vesicle protein p38) [MASS=33845]                                                                                                                                                                                         | 1.00 | 0.62 | 0.97 | 0.69 | 1.00 | 0.54 | <b>3.00</b> | <b>0.62</b> | <b>0.04</b> |
| TBA1_HUMAN (P68366) Tubulin alpha-1 chain (Alpha-tubulin 1) (Testis-specific alpha-tubulin) (Tubulin H2-alpha) [MASS=49924]                                                                                                                                                 | 1.00 | 0.95 | 1.00 | 0.95 | 1.00 | 0.91 | <b>3.00</b> | <b>0.94</b> | <b>0.01</b> |
| TBB2_HUMAN (P07437) Tubulin beta-2 chain [MASS=49671]                                                                                                                                                                                                                       | 1.00 | 0.93 | 1.00 | 1.05 | 1.00 | 0.80 | <b>3.00</b> | <b>0.93</b> | <b>0.07</b> |
| THIL_HUMAN (P24752) Acetyl-CoA acetyltransferase, mitochondrial precursor (EC 2.3.1.9) (Acetoacetyl-CoA thiolase) (T2) [MASS=45199]                                                                                                                                         | 1.00 | 1.21 | 0.00 | 2.15 | 1.00 | 1.64 | <b>3.00</b> | <b>1.67</b> | <b>0.27</b> |
| TOM70_HUMAN (O94826) Mitochondrial precursor proteins import receptor (Translocase of outer membrane TOM70) [MASS=67454]                                                                                                                                                    | 1.00 | 1.12 | 0.92 | 1.67 | 1.00 | 1.39 | <b>3.00</b> | <b>1.39</b> | <b>0.16</b> |
| UQCR1_HUMAN (P31930) Ubiquinol-cytochrome-c reductase complex core protein I, mitochondrial precursor (EC 1.10.2.2) [MASS=52645]                                                                                                                                            | 1.00 | 1.42 | 1.00 | 2.10 | 1.00 | 1.77 | <b>3.00</b> | <b>1.76</b> | <b>0.20</b> |
| UQCR2_HUMAN (P22695) Ubiquinol-cytochrome-c reductase complex core protein 2, mitochondrial precursor (EC 1.10.2.2) (Complex III subunit II) [MASS=48443]                                                                                                                   | 1.00 | 1.85 | 1.00 | 0.82 | 1.00 | 1.62 | <b>3.00</b> | <b>1.43</b> | <b>0.31</b> |
| VATA1_HUMAN (P38606) Vacuolar ATP synthase catalytic subunit A, ubiquitous isoform (EC 3.6.3.14) (V-ATPase subunit A 1) (Vacuolar proton pump alpha subunit 1) (V-ATPase 69 kDa subunit 1) (Isoform VA68) [MASS=68304]                                                      | 0.00 | 0.17 | 0.00 | 0.06 | 1.00 | 0.64 | <b>3.00</b> | <b>0.29</b> | <b>0.18</b> |
| VDAC1_HUMAN (P21796) Voltage-dependent anion-selective channel protein 1 (VDAC-1) (hVDAC1) (Outer mitochondrial membrane protein porin 1) (Plasmalemmal porin) (Porin 31HL) (Porin 31HM) [MASS=30641]                                                                       | 1.00 | 2.12 | 1.00 | 1.99 | 1.00 | 1.51 | <b>3.00</b> | <b>1.87</b> | <b>0.19</b> |
| VDAC2_HUMAN (P45880) Voltage-dependent anion-selective channel protein 2 (VDAC-2) (hVDAC2) (Outer mitochondrial membrane protein porin 2) [MASS=38092]                                                                                                                      | 0.99 | 1.41 | 1.00 | 1.90 | 1.00 | 1.61 | <b>3.00</b> | <b>1.64</b> | <b>0.14</b> |
| 1433E_HUMAN (P62258) 14-3-3 protein epsilon (14-3-3E) [MASS=29174]                                                                                                                                                                                                          | *    | *    | 0.00 | 0.64 | 1.00 | 0.81 | <b>2.00</b> | <b>0.73</b> | <b>0.08</b> |
| 1433Z_HUMAN (P63104) 14-3-3 protein zeta/delta (Protein kinase C inhibitor protein 1) (KCIP-1) [MASS=27745]                                                                                                                                                                 | 1.00 | 0.75 | *    | *    | 1.00 | 0.60 | <b>2.00</b> | <b>0.68</b> | <b>0.07</b> |
| ACON_HUMAN (Q99798) Aconitate hydratase, mitochondrial precursor (EC 4.2.1.3) (Citrate hydro-lyase) (Aconitase) [MASS=85425]                                                                                                                                                | 1.00 | 1.44 | *    | *    | 1.00 | 1.77 | <b>2.00</b> | <b>1.61</b> | <b>0.17</b> |

|                                                                                                                                                                                                                                                                                         |      |      |      |      |      |      |             |             |             |
|-----------------------------------------------------------------------------------------------------------------------------------------------------------------------------------------------------------------------------------------------------------------------------------------|------|------|------|------|------|------|-------------|-------------|-------------|
| ACOT9_HUMAN (Q9Y305) Acyl-coenzyme A thioesterase 9 (EC 3.1.2.-) (Acyl-CoA thioesterase 9) (Acyl-CoA thioester hydrolase 9) [MASS=46354]                                                                                                                                                | 0.00 | 2.03 | *    | *    | 1.00 | 1.13 | <b>2.00</b> | <b>1.58</b> | <b>0.45</b> |
| ACPM_HUMAN (O14561) Acyl carrier protein, mitochondrial precursor (ACP) (NADH-ubiquinone oxidoreductase 9.6 kDa subunit) (CI-SDAP) [MASS=17417]                                                                                                                                         | 1.00 | 1.61 | *    | *    | 1.00 | 1.39 | <b>2.00</b> | <b>1.50</b> | <b>0.11</b> |
| ADCY5_HUMAN (O95622) Adenylate cyclase type 5 (EC 4.6.1.1) (Adenylate cyclase type V) (ATP pyrophosphate-lyase 5) (Adenylyl cyclase 5) (Fragment) [MASS=100876]                                                                                                                         | 0.00 | 3.54 | *    | *    | 0.00 | 0.96 | <b>2.00</b> | <b>2.25</b> | <b>1.29</b> |
| ALBU_HUMAN (P02768) Serum albumin precursor [MASS=69366]                                                                                                                                                                                                                                | 1.00 | 0.67 | *    | *    | 1.00 | 0.73 | <b>2.00</b> | <b>0.70</b> | <b>0.03</b> |
| ALDOA_HUMAN (P04075) Fructose-bisphosphate aldolase A (EC 4.1.2.13) (Muscle-type aldolase) (Lung cancer antigen NY-LU-1) [MASS=39289]                                                                                                                                                   | 1.00 | 0.67 | 0.32 | *    | 1.00 | 0.80 | <b>2.00</b> | <b>0.74</b> | <b>0.06</b> |
| ANXA2_HUMAN (P07355) Annexin A2 (Annexin II) (Lipocortin II) (Calpactin I heavy chain) (Chromobindin-8) (p36) (Protein I) (Placental anticoagulant protein IV) (PAP-IV) [MASS=38473]                                                                                                    | 0.93 | 1.63 | *    | *    | 1.00 | 1.64 | <b>2.00</b> | <b>1.64</b> | <b>0.01</b> |
| ANXA6_HUMAN (P08133) Annexin A6 (Annexin VI) (Lipocortin VI) (P68) (P70) (Protein III) (Chromobindin-20) (67 kDa calelectrin) (Calphobindin-II) (CPB-II) [MASS=75742]                                                                                                                   | 0.00 | 1.38 | *    | *    | 1.00 | 0.99 | <b>2.00</b> | <b>1.19</b> | <b>0.19</b> |
| AOFA_HUMAN (P21397) Amine oxidase [flavin-containing] A (EC 1.4.3.4) (Monoamine oxidase type A) (MAO-A) [MASS=59681]                                                                                                                                                                    | *    | *    | 0.21 | 2.32 | 0.72 | 1.64 | <b>2.00</b> | <b>1.98</b> | <b>0.34</b> |
| AP2A2_HUMAN (O94973) AP-2 complex subunit alpha-2 (Adapter-related protein complex 2 alpha-2 subunit) (Alpha-adaptin C) (Adaptor protein complex AP-2 alpha-2 subunit) (Clathrin assembly protein complex 2 alpha-C large chain) (100 kDa coated vesicle prote [MASS=103960]            | *    | *    | 0.63 | 0.70 | 0.25 | 1.77 | <b>2.00</b> | <b>1.24</b> | <b>0.54</b> |
| AT1A1_HUMAN (P05023) Sodium/potassium-transporting ATPase alpha-1 chain precursor (EC 3.6.3.9) (Sodium pump 1) (Na <sup>+</sup> /K <sup>+</sup> ATPase 1) [MASS=112895]                                                                                                                 | 1.00 | 0.79 | *    | *    | 1.00 | 0.54 | <b>2.00</b> | <b>0.67</b> | <b>0.13</b> |
| AT2A2_HUMAN (P16615) Sarcoplasmic/endoplasmic reticulum calcium ATPase 2 (EC 3.6.3.8) (Calcium pump 2) (SERCA2) (SR Ca <sup>2+</sup> -ATPase 2) (Calcium-transporting ATPase sarcoplasmic reticulum type, slow twitch skeletal muscle isoform) (Endoplasmic reticulum cla [MASS=114756] | 0.82 | 0.90 | *    | *    | 1.00 | 1.05 | <b>2.00</b> | <b>0.98</b> | <b>0.07</b> |
| AT2B1_HUMAN (P20020) Plasma membrane calcium-transporting ATPase 1 (EC 3.6.3.8) (PMCA1) (Plasma membrane calcium pump isoform 1) (Plasma membrane calcium ATPase isoform 1) [MASS=138754]                                                                                               | 1.00 | *    | 0.42 | 0.77 | 0.99 | 0.48 | <b>2.00</b> | <b>0.63</b> | <b>0.15</b> |

|                                                                                                                                                                                                                                                                             |      |      |      |      |      |      |             |             |             |
|-----------------------------------------------------------------------------------------------------------------------------------------------------------------------------------------------------------------------------------------------------------------------------|------|------|------|------|------|------|-------------|-------------|-------------|
| AT5F1_HUMAN (P24539) ATP synthase B chain, mitochondrial precursor (EC 3.6.3.14) [MASS=28908]                                                                                                                                                                               | 0.00 | 1.77 | *    | *    | 0.77 | 1.94 | <b>2.00</b> | <b>1.86</b> | <b>0.09</b> |
| ATF6B_HUMAN (Q99941) Cyclic AMP-dependent transcription factor ATF-6 beta (Activating transcription factor 6 beta) (ATF6-beta) (cAMP-responsive element-binding protein-like 1) (cAMP response element-binding protein-related protein) (Creb-rp) (Protein G13 [MASS=76709] | 0.00 | 0.52 | *    | *    | 0.24 | 1.31 | <b>2.00</b> | <b>0.92</b> | <b>0.40</b> |
| ATP5E_HUMAN (P56381) ATP synthase epsilon chain, mitochondrial (EC 3.6.3.14) [MASS=5649]                                                                                                                                                                                    | 0.00 | 1.39 | *    | *    | 1.00 | 1.78 | <b>2.00</b> | <b>1.59</b> | <b>0.20</b> |
| ATP8_HUMAN (P03928) ATP synthase protein 8 (EC 3.6.3.14) (ATPase subunit 8) (A6L) [MASS=7992]                                                                                                                                                                               | 1.00 | 1.82 | *    | *    | 1.00 | 1.94 | <b>2.00</b> | <b>1.88</b> | <b>0.06</b> |
| C1QBP_HUMAN (Q07021) Complement component 1 Q subcomponent-binding protein, mitochondrial precursor (Glycoprotein gC1qBP) (C1qBP) (GC1q-R protein) (Hyaluronan-binding protein 1) (Mitochondrial matrix protein p32) (p33) [MASS=31362]                                     | 1.00 | 1.46 | *    | *    | 1.00 | 1.65 | <b>2.00</b> | <b>1.56</b> | <b>0.09</b> |
| CAC2D_HUMAN (P54289) Dihydropyridine-sensitive L-type calcium channel subunits alpha-2/delta precursor [Contains: L-type calcium channel subunit alpha-2; L-type calcium channel subunit delta] [MASS=123183]                                                               | 0.82 | 1.10 | *    | *    | 0.97 | 0.79 | <b>2.00</b> | <b>0.95</b> | <b>0.16</b> |
| CD59_HUMAN (P13987) CD59 glycoprotein precursor (Membrane attack complex inhibition factor) (MACIF) (MAC-inhibitory protein) (MAC-IP) (Protectin) (MEM43 antigen) (Membrane inhibitor of reactive lysis) (MIRL) (20 kDa homologous restriction factor) (HRF-20 [MASS=14177] | 1.00 | 0.57 | *    | *    | 1.00 | 0.60 | <b>2.00</b> | <b>0.59</b> | <b>0.02</b> |
| CD9_HUMAN (P21926) CD9 antigen (p24) (Leukocyte antigen MIC3) (Motility-related protein) (MRP-1) (Tetraspanin-29) (Tspan-29) [MASS=25285]                                                                                                                                   | 1.00 | 0.96 | *    | *    | 1.00 | 0.92 | <b>2.00</b> | <b>0.94</b> | <b>0.02</b> |
| CENB2_HUMAN (Q15057) Centaurin-beta 2 (Cnt-b2) [MASS=88028]                                                                                                                                                                                                                 | 0.00 | 0.73 | 0.00 | 0.66 | *    | *    | <b>2.00</b> | <b>0.70</b> | <b>0.03</b> |
| CHCH3_HUMAN (Q9NX63) Coiled-coil-helix-coiled-coil-helix domain-containing protein 3 [MASS=26152]                                                                                                                                                                           | 0.99 | 1.32 | *    | *    | 1.00 | 1.50 | <b>2.00</b> | <b>1.41</b> | <b>0.09</b> |
| CHCH6_HUMAN (Q9BRQ6) Coiled-coil-helix-coiled-coil-helix domain-containing protein 6 [MASS=26458]                                                                                                                                                                           | 1.00 | 1.17 | *    | *    | 1.00 | 1.31 | <b>2.00</b> | <b>1.24</b> | <b>0.07</b> |
| CLH1_HUMAN (Q00610) Clathrin heavy chain 1 (CLH-17) [MASS=191482]                                                                                                                                                                                                           | 0.99 | 0.53 | *    | *    | 1.00 | 0.56 | <b>2.00</b> | <b>0.55</b> | <b>0.02</b> |
| CNTN1_HUMAN (Q12860) Contactin-1 precursor (Neural cell surface protein F3) (Glycoprotein gp135) [MASS=113320]                                                                                                                                                              | 0.99 | 0.60 | *    | *    | 0.54 | 0.44 | <b>2.00</b> | <b>0.52</b> | <b>0.08</b> |
| CNTP1_HUMAN (P78357) Contactin-associated protein 1 precursor (Caspr) (Caspr1) (Neurexin 4) (Neurexin IV) (p190) [MASS=156266]                                                                                                                                              | 0.31 | 0.90 | *    | *    | 0.62 | 1.81 | <b>2.00</b> | <b>1.36</b> | <b>0.46</b> |
| CO039_HUMAN (Q6ZRI6) Uncharacterized protein C15orf39 [MASS=110788]                                                                                                                                                                                                         | 0.00 | 1.12 | 0.37 | 1.02 | *    | *    | <b>2.00</b> | <b>1.07</b> | <b>0.05</b> |

|                                                                                                                                                                                                                                                              |      |      |      |      |      |      |             |             |             |
|--------------------------------------------------------------------------------------------------------------------------------------------------------------------------------------------------------------------------------------------------------------|------|------|------|------|------|------|-------------|-------------|-------------|
| COF1_HUMAN (P23528) Cofilin-1 (Cofilin, non-muscle isoform) (18 kDa phosphoprotein) (p18) [MASS=18371]                                                                                                                                                       | 0.74 | 0.61 | *    | *    | 1.00 | 0.61 | <b>2.00</b> | <b>0.61</b> | <b>0.00</b> |
| COX5B_HUMAN (P10606) Cytochrome c oxidase polypeptide Vb, mitochondrial precursor (EC 1.9.3.1) [MASS=13696]                                                                                                                                                  | 0.48 | 1.46 | *    | *    | 1.00 | 2.27 | <b>2.00</b> | <b>1.87</b> | <b>0.41</b> |
| COX7C_HUMAN (P15954) Cytochrome c oxidase polypeptide VIIc, mitochondrial precursor (EC 1.9.3.1) [MASS=7245]                                                                                                                                                 | *    | *    | 0.74 | 1.26 | 1.00 | 1.72 | <b>2.00</b> | <b>1.49</b> | <b>0.23</b> |
| CRYM_HUMAN (Q14894) Mu-crystallin homolog (NADP-regulated thyroid-hormone-binding protein) [MASS=33775]                                                                                                                                                      | 0.24 | 0.86 | *    | *    | 0.92 | 0.89 | <b>2.00</b> | <b>0.88</b> | <b>0.02</b> |
| CSMD3_HUMAN (Q7Z407) CUB and sushi domain-containing protein 3 precursor (CUB and sushi multiple domains protein 3) [MASS=401695]                                                                                                                            | 0.00 | 2.02 | 0.00 | 0.31 | *    | *    | <b>2.00</b> | <b>1.17</b> | <b>0.86</b> |
| CSPG2_HUMAN (P13611) Versican core protein precursor (Large fibroblast proteoglycan) (Chondroitin sulfate proteoglycan core protein 2) (PG-M) (Glial hyaluronate-binding protein) (GHAP) [MASS=372817]                                                       | 1.00 | 0.48 | *    | *    | 1.00 | 0.40 | <b>2.00</b> | <b>0.44</b> | <b>0.04</b> |
| CTL2_HUMAN (Q8IWA5) Choline transporter-like protein 2 (Solute carrier family 44 member 2) [MASS=80151]                                                                                                                                                      | 0.00 | 0.80 | *    | *    | 1.00 | 1.07 | <b>2.00</b> | <b>0.94</b> | <b>0.14</b> |
| CYTC_HUMAN (P01034) Cystatin C precursor (Neuroendocrine basic polypeptide) (Gamma-trace) (Post-gamma-globulin) [MASS=15799]                                                                                                                                 | 0.85 | 0.63 | *    | *    | 0.00 | 0.15 | <b>2.00</b> | <b>0.39</b> | <b>0.24</b> |
| DCX_HUMAN (O43602) Neuronal migration protein doublecortin (Lissencephalin-X) (Lis-X) (Doublin) [MASS=44925]                                                                                                                                                 | *    | *    | 0.00 | 1.25 | 0.00 | 1.20 | <b>2.00</b> | <b>1.23</b> | <b>0.02</b> |
| DPOD1_HUMAN (P28340) DNA polymerase delta catalytic subunit (EC 2.7.7.7) (DNA polymerase subunit delta p125) [MASS=123630]                                                                                                                                   | 0.00 | 0.54 | 0.00 | 4.99 | *    | *    | <b>2.00</b> | <b>2.77</b> | <b>2.23</b> |
| DYN1_HUMAN (Q05193) Dynamin-1 (EC 3.6.5.5) [MASS=97407]                                                                                                                                                                                                      | *    | *    | 0.96 | 0.84 | 1.00 | 0.61 | <b>2.00</b> | <b>0.73</b> | <b>0.12</b> |
| EAA2_HUMAN (P43004) Excitatory amino acid transporter 2 (Sodium-dependent glutamate/aspartate transporter 2) [MASS=62104]                                                                                                                                    | 1.00 | 0.45 | *    | *    | 1.00 | 0.54 | <b>2.00</b> | <b>0.50</b> | <b>0.05</b> |
| ECHA_HUMAN (P40939) Trifunctional enzyme subunit alpha, mitochondrial precursor (TP-alpha) (78 kDa gastrin-binding protein) [Includes: Long-chain enoyl-CoA hydratase (EC 4.2.1.17); Long chain 3-hydroxyacyl-CoA dehydrogenase (EC 1.1.1.211)] [MASS=82999] | 0.98 | 1.30 | *    | *    | 1.00 | 1.43 | <b>2.00</b> | <b>1.37</b> | <b>0.06</b> |
| EFTU_HUMAN (P49411) Elongation factor Tu, mitochondrial precursor (EF-Tu) (P43) [MASS=49541]                                                                                                                                                                 | 1.00 | 1.78 | *    | *    | 1.00 | 1.35 | <b>2.00</b> | <b>1.57</b> | <b>0.22</b> |
| ENOG_HUMAN (P09104) Gamma-enolase (EC 4.2.1.11) (2-phospho-D-glycerate hydro-lyase) (Neural enolase) (Neuron-specific enolase) (NSE) (Enolase 2) [MASS=47137]                                                                                                | *    | *    | 0.99 | 0.64 | 1.00 | 0.59 | <b>2.00</b> | <b>0.62</b> | <b>0.03</b> |
| EPHB1_HUMAN (P54762) Ephrin type-B receptor 1 precursor (EC 2.7.10.1) (Tyrosine-protein kinase receptor EPH-2) (NET) (HEK6) (ELK) [MASS=109885]                                                                                                              | *    | *    | 0.00 | 1.28 | 0.00 | 1.12 | <b>2.00</b> | <b>1.20</b> | <b>0.08</b> |

|                                                                                                                                                                                                                                                  |      |      |      |      |      |       |             |             |             |
|--------------------------------------------------------------------------------------------------------------------------------------------------------------------------------------------------------------------------------------------------|------|------|------|------|------|-------|-------------|-------------|-------------|
| ERR2_HUMAN (O95718) Steroid hormone receptor ERR2 (Estrogen-related receptor, beta) (ERR-beta) (Estrogen receptor-like 2) (ERR beta-2) [MASS=55619]                                                                                              | 0.00 | 0.58 | *    | *    | 0.00 | 0.41  | <b>2.00</b> | <b>0.50</b> | <b>0.08</b> |
| ES1_HUMAN (P30042) ES1 protein homolog, mitochondrial precursor (Protein KNP-I) (Protein GT335) [MASS=28142]                                                                                                                                     | 0.95 | 1.41 | *    | *    | 1.00 | 1.44  | <b>2.00</b> | <b>1.43</b> | <b>0.02</b> |
| FARP2_HUMAN (O94887) FERM, RhoGEF and pleckstrin domain-containing protein 2 (FERM domain including RhoGEF) (FIR) [MASS=119888]                                                                                                                  | 0.00 | 6.03 | *    | *    | 0.00 | 10.14 | <b>2.00</b> | <b>8.09</b> | <b>2.05</b> |
| FHL2_HUMAN (Q14192) Four and a half LIM domains protein 2 (FHL-2) (Skeletal muscle LIM-protein 3) (SLIM 3) (LIM-domain protein DRAL) [MASS=32196]                                                                                                | *    | *    | 0.00 | 0.18 | 0.00 | 0.19  | <b>2.00</b> | <b>0.19</b> | <b>0.01</b> |
| FYV1_HUMAN (Q9Y2I7) FYVE finger-containing phosphoinositide kinase (EC 2.7.1.68) (1-phosphatidylinositol-4-phosphate 5-kinase) (Phosphatidylinositol-3-phosphate 5-kinase type III) (PIP5K) (PtdIns(4)P-5-kinase) (PIKfyve) (p235) [MASS=237107] | 0.00 | 0.02 | *    | *    | 0.00 | 9.10  | <b>2.00</b> | <b>4.56</b> | <b>4.54</b> |
| GBB3_HUMAN (P16520) Guanine nucleotide-binding protein G(I)/G(S)/G(T) subunit beta 3 (Transducin beta chain 3) [MASS=37221]                                                                                                                      | 0.00 | 0.68 | *    | *    | 0.81 | 1.81  | <b>2.00</b> | <b>1.25</b> | <b>0.57</b> |
| GBG2_HUMAN (P59768) Guanine nucleotide-binding protein G(I)/G(S)/G(O) gamma-2 subunit precursor (G gamma-1) [MASS=7719]                                                                                                                          | 1.00 | 0.54 | *    | *    | 1.00 | 0.61  | <b>2.00</b> | <b>0.58</b> | <b>0.04</b> |
| GNAI2_HUMAN (P04899) Guanine nucleotide-binding protein G(i), alpha-2 subunit (Adenylate cyclase-inhibiting G alpha protein) [MASS=40319]                                                                                                        | 0.99 | 1.08 | *    | *    | 1.00 | 0.51  | <b>2.00</b> | <b>0.80</b> | <b>0.29</b> |
| GNAO1_HUMAN (P09471) Guanine nucleotide-binding protein G(o) subunit alpha 1 [MASS=39919]                                                                                                                                                        | 1.00 | 0.58 | *    | *    | 1.00 | 0.49  | <b>2.00</b> | <b>0.54</b> | <b>0.05</b> |
| GPDM_HUMAN (P43304) Glycerol-3-phosphate dehydrogenase, mitochondrial precursor (EC 1.1.99.5) (GPD-M) (GPDH-M) (mtGPD) [MASS=80833]                                                                                                              | 1.00 | 1.27 | *    | *    | 1.00 | 1.50  | <b>2.00</b> | <b>1.39</b> | <b>0.11</b> |
| GPM6A_HUMAN (P51674) Neuronal membrane glycoprotein M6-a (M6a) [MASS=31209]                                                                                                                                                                      | 0.40 | 0.98 | *    | *    | 1.00 | 0.48  | <b>2.00</b> | <b>0.73</b> | <b>0.25</b> |
| GPVI_HUMAN (Q9HCN6) Platelet glycoprotein VI precursor [MASS=36923]                                                                                                                                                                              | 0.00 | 3.04 | *    | *    | 0.00 | 3.20  | <b>2.00</b> | <b>3.12</b> | <b>0.08</b> |
| GRP75_HUMAN (P38646) Stress-70 protein, mitochondrial precursor (75 kDa glucose-regulated protein) (GRP 75) (Peptide-binding protein 74) (PBP74) (Mortalin) (MOT) [MASS=73680]                                                                   | 1.00 | 0.22 | *    | *    | 1.00 | 0.83  | <b>2.00</b> | <b>0.53</b> | <b>0.31</b> |
| HBB_HUMAN (P68871) Hemoglobin subunit beta (Hemoglobin beta chain) (Beta-globin) [MASS=15867]                                                                                                                                                    | 1.00 | 0.83 | *    | *    | 1.00 | 0.85  | <b>2.00</b> | <b>0.84</b> | <b>0.01</b> |

|                                                                                                                                                                                                               |      |      |      |      |      |      |             |             |             |
|---------------------------------------------------------------------------------------------------------------------------------------------------------------------------------------------------------------|------|------|------|------|------|------|-------------|-------------|-------------|
| HS74L_HUMAN (O95757) Heat shock 70 kDa protein 4L (Osmotic stress protein 94) (Heat shock 70-related protein APG-1) [MASS=94486]                                                                              | 0.00 | 0.97 | *    | *    | 0.51 | 0.85 | <b>2.00</b> | <b>0.91</b> | <b>0.06</b> |
| I2C1_HUMAN (Q9UL18) Eukaryotic translation initiation factor 2C 1 (eIF2C 1) (eIF-2C 1) (Argonaute-1) (Putative RNA-binding protein Q99) [MASS=97214]                                                          | *    | *    | 0.00 | 3.76 | 0.00 | 1.40 | <b>2.00</b> | <b>2.58</b> | <b>1.18</b> |
| IDH3G_HUMAN (P51553) Isocitrate dehydrogenase [NAD] subunit gamma, mitochondrial precursor (EC 1.1.1.41) (Isocitric dehydrogenase) (NAD(+)-specific ICDH) [MASS=42794]                                        | 0.99 | 1.53 | *    | *    | 1.00 | 1.51 | <b>2.00</b> | <b>1.52</b> | <b>0.01</b> |
| IGS4B_HUMAN (Q8N126) Immunoglobulin superfamily member 4B precursor (Nectin-like protein 1) (TSLC1-like protein 1) (Synaptic cell adhesion molecule 3) (Brain immunoglobulin receptor) [MASS=43300]           | 1.00 | 0.69 | *    | *    | 1.00 | 0.54 | <b>2.00</b> | <b>0.62</b> | <b>0.07</b> |
| IVD_HUMAN (P26440) Isovaleryl-CoA dehydrogenase, mitochondrial precursor (EC 1.3.99.10) (IVD) [MASS=46319]                                                                                                    | *    | *    | 0.00 | 2.38 | 0.96 | 1.54 | <b>2.00</b> | <b>1.96</b> | <b>0.42</b> |
| KCC2A_HUMAN (Q9UQM7) Calcium/calmodulin-dependent protein kinase type II alpha chain (EC 2.7.11.17) (CaM-kinase II alpha chain) (CaM kinase II alpha subunit) (CaMK-II subunit alpha) [MASS=54029]            | 1.00 | 0.82 | *    | *    | 1.00 | 0.90 | <b>2.00</b> | <b>0.86</b> | <b>0.04</b> |
| KCC2D_HUMAN (Q13557) Calcium/calmodulin-dependent protein kinase type II delta chain (EC 2.7.11.17) (CaM-kinase II delta chain) (CaM kinase II subunit delta) (CaMK-II subunit delta) [MASS=56297]            | 1.00 | 0.83 | *    | *    | 1.00 | 0.81 | <b>2.00</b> | <b>0.82</b> | <b>0.01</b> |
| L1CAM_HUMAN (P32004) Neural cell adhesion molecule L1 precursor (N-CAM L1) (CD171 antigen) [MASS=140002]                                                                                                      | 1.00 | 0.67 | *    | *    | 1.00 | 0.72 | <b>2.00</b> | <b>0.70</b> | <b>0.02</b> |
| LAC_HUMAN (P01842) Ig lambda chain C regions [MASS=11236]                                                                                                                                                     | 0.30 | 1.57 | *    | *    | 0.89 | 1.16 | <b>2.00</b> | <b>1.37</b> | <b>0.21</b> |
| LDHB_HUMAN (P07195) L-lactate dehydrogenase B chain (EC 1.1.1.27) (LDH-B) (LDH heart subunit) (LDH-H) (NY-REN-46 antigen) [MASS=36507]                                                                        | 1.00 | 0.68 | *    | *    | 1.00 | 0.61 | <b>2.00</b> | <b>0.65</b> | <b>0.03</b> |
| LETM1_HUMAN (O95202) Leucine zipper-EF-hand-containing transmembrane protein 1, mitochondrial precursor [MASS=83354]                                                                                          | *    | *    | 1.00 | 1.33 | 0.99 | 1.40 | <b>2.00</b> | <b>1.37</b> | <b>0.04</b> |
| M2OM_HUMAN (Q02978) Mitochondrial 2-oxoglutarate/malate carrier protein (OGCP) (Solute carrier family 25 member 11) [MASS=33930]                                                                              | 0.65 | 1.57 | *    | *    | 0.97 | 1.79 | <b>2.00</b> | <b>1.68</b> | <b>0.11</b> |
| MACF1_HUMAN (Q9UPN3) Microtubule-actin crosslinking factor 1, isoforms 1/2/3/5 (Actin cross-linking family protein 7) (Macrophin-1) (Trabeculin-alpha) (620 kDa actin-binding protein) (ABP620) [MASS=620414] | 0.00 | 0.82 | *    | *    | 0.00 | 1.16 | <b>2.00</b> | <b>0.99</b> | <b>0.17</b> |
| MAON_HUMAN (Q16798) NADP-dependent malic enzyme, mitochondrial precursor (EC 1.1.1.40) (NADP-ME) (Malic enzyme 3) [MASS=67054]                                                                                | *    | *    | 0.95 | 1.33 | 1.00 | 1.71 | <b>2.00</b> | <b>1.52</b> | <b>0.19</b> |
| MCLN3_HUMAN (Q8TDD5) Mucolipin-3 [MASS=64247]                                                                                                                                                                 | 0.00 | 5.74 | 0.30 | 0.76 | *    | *    | <b>2.00</b> | <b>3.25</b> | <b>2.49</b> |



|                                                                                                                                                                                                                                                                      |      |      |      |      |      |      |             |             |             |
|----------------------------------------------------------------------------------------------------------------------------------------------------------------------------------------------------------------------------------------------------------------------|------|------|------|------|------|------|-------------|-------------|-------------|
| MFN2_HUMAN (O95140) Transmembrane GTPase MFN2 (EC 3.6.5.-) (Mitofusin-2) [MASS=86402]                                                                                                                                                                                | 0.00 | 0.46 | *    | *    | 1.00 | 1.43 | <b>2.00</b> | <b>0.95</b> | <b>0.49</b> |
| MK03_HUMAN (P27361) Mitogen-activated protein kinase 3 (EC 2.7.11.24) (Extracellular signal-regulated kinase 1) (ERK-1) (Insulin-stimulated MAP2 kinase) (MAP kinase 1) (MAPK 1) (p44-ERK1) (ERT2) (p44-MAPK) (Microtubule-associated protein 2 kinase) [MASS=43135] | 0.81 | 0.49 | *    | *    | 0.98 | 1.00 | <b>2.00</b> | <b>0.75</b> | <b>0.26</b> |
| MMSA_HUMAN (Q02252) Methylmalonate-semialdehyde dehydrogenase [acylating], mitochondrial precursor (EC 1.2.1.27) (MMSDH) (Malonate-semialdehyde dehydrogenase [acylating]) (EC 1.2.1.18) [MASS=57839]                                                                | 1.00 | 1.26 | *    | *    | 1.00 | 1.56 | <b>2.00</b> | <b>1.41</b> | <b>0.15</b> |
| MOG_HUMAN (Q16653) Myelin-oligodendrocyte glycoprotein precursor [MASS=28179]                                                                                                                                                                                        | *    | *    | 0.79 | 0.94 | 1.00 | 0.84 | <b>2.00</b> | <b>0.89</b> | <b>0.05</b> |
| MSRA_HUMAN (Q9UJ68) Peptide methionine sulfoxide reductase (EC 1.8.4.6) (Protein-methionine-S-oxide reductase) (PMSR) (Peptide Met(O) reductase) [MASS=26132]                                                                                                        | 0.00 | 0.58 | 0.00 | 0.78 | *    | *    | <b>2.00</b> | <b>0.68</b> | <b>0.10</b> |
| MTCH2_HUMAN (Q9Y6C9) Mitochondrial carrier homolog 2 (Met-induced mitochondrial protein) [MASS=33331]                                                                                                                                                                | 0.96 | 1.28 | *    | *    | 1.00 | 1.58 | <b>2.00</b> | <b>1.43</b> | <b>0.15</b> |
| NCA11_HUMAN (P13591) Neural cell adhesion molecule 1, 140 kDa isoform precursor (N-CAM 140) (NCAM-140) (CD56 antigen) [MASS=93360]                                                                                                                                   | 1.00 | 0.47 | *    | *    | 1.00 | 0.43 | <b>2.00</b> | <b>0.45</b> | <b>0.02</b> |
| NDUA2_HUMAN (O43678) NADH dehydrogenase [ubiquinone] 1 alpha subcomplex subunit 2 (EC 1.6.5.3) (EC 1.6.99.3) (NADH-ubiquinone oxidoreductase B8 subunit) (Complex I-B8) (CI-B8) [MASS=10790]                                                                         | 1.00 | 1.88 | *    | *    | 1.00 | 1.68 | <b>2.00</b> | <b>1.78</b> | <b>0.10</b> |
| NDUA5_HUMAN (Q16718) NADH dehydrogenase [ubiquinone] 1 alpha subcomplex subunit 5 (EC 1.6.5.3) (EC 1.6.99.3) (NADH-ubiquinone oxidoreductase 13 kDa-B subunit) (Complex I-13Kd-B) (CI-13Kd-B) (Complex I subunit B13) [MASS=13327]                                   | 1.00 | 1.31 | *    | *    | 1.00 | 1.62 | <b>2.00</b> | <b>1.47</b> | <b>0.16</b> |
| NDUA7_HUMAN (O95182) NADH dehydrogenase [ubiquinone] 1 alpha subcomplex subunit 7 (EC 1.6.5.3) (EC 1.6.99.3) (NADH-ubiquinone oxidoreductase subunit B14.5a) (Complex I-B14.5a) (CI-B14.5a) [MASS=12420]                                                             | *    | *    | 0.00 | 2.43 | 0.99 | 2.68 | <b>2.00</b> | <b>2.56</b> | <b>0.13</b> |
| NDUAB_HUMAN (Q86Y39) NADH dehydrogenase [ubiquinone] 1 alpha subcomplex subunit 11 (EC 1.6.5.3) (EC 1.6.99.3) (NADH-ubiquinone oxidoreductase subunit B14.7) (Complex I-B14.7) (CI-B14.7) [MASS=14721]                                                               | 0.99 | 1.18 | *    | *    | 0.38 | 1.06 | <b>2.00</b> | <b>1.12</b> | <b>0.06</b> |

|                                                                                                                                                                                                                             |      |      |      |      |      |      |             |             |             |
|-----------------------------------------------------------------------------------------------------------------------------------------------------------------------------------------------------------------------------|------|------|------|------|------|------|-------------|-------------|-------------|
| NDUB7_HUMAN (P17568) NADH dehydrogenase [ubiquinone] 1 beta subcomplex subunit 7 (EC 1.6.5.3) (EC 1.6.99.3) (NADH-ubiquinone oxidoreductase B18 subunit) (Complex I-B18) (CI-B18) (Cell adhesion protein SQM1) [MASS=16271] | 1.00 | 1.56 | *    | *    | 1.00 | 1.72 | <b>2.00</b> | <b>1.64</b> | <b>0.08</b> |
| NFASC_HUMAN (O94856) Neurofascin precursor [MASS=150026]                                                                                                                                                                    | *    | *    | 0.55 | 0.73 | 1.00 | 1.18 | <b>2.00</b> | <b>0.96</b> | <b>0.23</b> |
| NIPS2_HUMAN (O75323) Protein NipSnap2 (Glioblastoma amplified sequence) [MASS=33742]                                                                                                                                        | 1.00 | 1.49 | *    | *    | 1.00 | 1.68 | <b>2.00</b> | <b>1.59</b> | <b>0.09</b> |
| NNTM_HUMAN (Q13423) NAD(P) transhydrogenase, mitochondrial precursor (EC 1.6.1.2) (Pyridine nucleotide transhydrogenase) (Nicotinamide nucleotide transhydrogenase) [MASS=113895]                                           | 1.00 | 0.98 | *    | *    | 1.00 | 1.41 | <b>2.00</b> | <b>1.20</b> | <b>0.22</b> |
| NPTN_HUMAN (Q9Y639) Neuroplastin precursor (Stromal cell-derived receptor 1) (SDR-1) [MASS=31291]                                                                                                                           | 1.00 | 0.63 | *    | *    | 1.00 | 0.44 | <b>2.00</b> | <b>0.54</b> | <b>0.10</b> |
| NSF_HUMAN (P46459) Vesicle-fusing ATPase (EC 3.6.4.6) (Vesicular-fusion protein NSF) (N-ethylmaleimide sensitive fusion protein) (NEM-sensitive fusion protein) [MASS=82654]                                                | 1.00 | 0.86 | *    | *    | 1.00 | 0.89 | <b>2.00</b> | <b>0.88</b> | <b>0.02</b> |
| NU3M_HUMAN (P03897) NADH-ubiquinone oxidoreductase chain 3 (EC 1.6.5.3) (NADH dehydrogenase subunit 3) [MASS=13186]                                                                                                         | 0.99 | 1.26 | 0.94 | 1.72 | *    | *    | <b>2.00</b> | <b>1.49</b> | <b>0.23</b> |
| NUCM_HUMAN (O75306) NADH-ubiquinone oxidoreductase 49 kDa subunit, mitochondrial precursor (EC 1.6.5.3) (EC 1.6.99.3) (Complex I-49KD) (CI-49KD) [MASS=52545]                                                               | 0.97 | 1.06 | *    | *    | 0.98 | 1.70 | <b>2.00</b> | <b>1.38</b> | <b>0.32</b> |
| NUHM_HUMAN (P19404) NADH-ubiquinone oxidoreductase 24 kDa subunit, mitochondrial precursor (EC 1.6.5.3) (EC 1.6.99.3) [MASS=27391]                                                                                          | 1.00 | 1.53 | *    | *    | 1.00 | 1.79 | <b>2.00</b> | <b>1.66</b> | <b>0.13</b> |
| NUIM_HUMAN (O00217) NADH-ubiquinone oxidoreductase 23 kDa subunit, mitochondrial precursor (EC 1.6.5.3) (EC 1.6.99.3) (Complex I-23KD) (CI-23KD) (TYKY subunit) [MASS=23705]                                                | 0.00 | 2.73 | *    | *    | 1.00 | 2.05 | <b>2.00</b> | <b>2.39</b> | <b>0.34</b> |
| NUKM_HUMAN (O75251) NADH-ubiquinone oxidoreductase 20 kDa subunit, mitochondrial precursor (EC 1.6.5.3) (EC 1.6.99.3) (Complex I-20KD) (CI-20KD) (PSST subunit) [MASS=23563]                                                | 0.95 | 1.25 | *    | *    | 1.00 | 1.88 | <b>2.00</b> | <b>1.57</b> | <b>0.32</b> |
| PARK7_HUMAN (Q99497) Protein DJ-1 (Oncogene DJ1) [MASS=19891]                                                                                                                                                               | 0.00 | 0.96 | *    | *    | 1.00 | 0.92 | <b>2.00</b> | <b>0.94</b> | <b>0.02</b> |
| PGAM1_HUMAN (P18669) Phosphoglycerate mutase 1 (EC 5.4.2.1) (EC 5.4.2.4) (EC 3.1.3.13) (Phosphoglycerate mutase isozyme B) (PGAM-B) (BPG-dependent PGAM 1) [MASS=28673]                                                     | 0.00 | 0.80 | *    | *    | 1.00 | 0.66 | <b>2.00</b> | <b>0.73</b> | <b>0.07</b> |
| PIAS3_HUMAN (Q9Y6X2) Protein inhibitor of activated STAT protein 3 [MASS=68017]                                                                                                                                             | 0.00 | 0.28 | *    | *    | 0.54 | 0.18 | <b>2.00</b> | <b>0.23</b> | <b>0.05</b> |
| PP1A_HUMAN (P62136) Serine/threonine-protein phosphatase PP1-alpha catalytic subunit (EC 3.1.3.16) (PP-1A) [MASS=37512]                                                                                                     | 0.82 | 0.85 | *    | *    | 0.60 | 0.75 | <b>2.00</b> | <b>0.80</b> | <b>0.05</b> |

|                                                                                                                                                                                               |      |      |      |      |      |      |             |             |             |
|-----------------------------------------------------------------------------------------------------------------------------------------------------------------------------------------------|------|------|------|------|------|------|-------------|-------------|-------------|
| PPIA_HUMAN (P62937) Peptidyl-prolyl cis-trans isomerase A (EC 5.2.1.8) (PPIase A) (Rotamase A) (Cyclophilin A) (Cyclosporin A-binding protein) [MASS=17881]                                   | 1.00 | 1.02 | *    | *    | 1.00 | 0.72 | <b>2.00</b> | <b>0.87</b> | <b>0.15</b> |
| PRDM8_HUMAN (Q9NQV8) PR domain zinc finger protein 8 (PR domain-containing protein 8) [MASS=71709]                                                                                            | 0.00 | 1.85 | 0.00 | 0.10 | *    | *    | <b>2.00</b> | <b>0.98</b> | <b>0.88</b> |
| RAC1_HUMAN (P63000) Ras-related C3 botulinum toxin substrate 1 precursor (p21-Rac1) (Ras-like protein TC25) [MASS=21450]                                                                      | 1.00 | 0.66 | *    | *    | 1.00 | 0.69 | <b>2.00</b> | <b>0.68</b> | <b>0.02</b> |
| RANB9_HUMAN (Q96S59) Ran-binding protein 9 (RanBP9) (RanBP7) (Ran-binding protein M) (RanBPM) (BPM90) (BPM-L) [MASS=77847]                                                                    | *    | *    | 0.00 | 0.24 | 0.00 | 1.82 | <b>2.00</b> | <b>1.03</b> | <b>0.79</b> |
| RELN_HUMAN (P78509) Reelin precursor (EC 3.4.21.-) [MASS=388399]                                                                                                                              | *    | *    | 0.00 | 0.29 | 0.00 | 2.54 | <b>2.00</b> | <b>1.42</b> | <b>1.13</b> |
| RHOA_HUMAN (P61586) Transforming protein RhoA precursor (H12) [MASS=21768]                                                                                                                    | 1.00 | 0.75 | *    | *    | 1.00 | 0.79 | <b>2.00</b> | <b>0.77</b> | <b>0.02</b> |
| SACS_HUMAN (Q9NZJ4) Sacsin [MASS=436973]                                                                                                                                                      | 0.00 | 0.27 | 0.00 | 1.49 | *    | *    | <b>2.00</b> | <b>0.88</b> | <b>0.61</b> |
| SAM50_HUMAN (Q9Y512) Sorting and assembly machinery component 50 homolog [MASS=51962]                                                                                                         | 0.97 | 1.99 | *    | *    | 1.00 | 1.55 | <b>2.00</b> | <b>1.77</b> | <b>0.22</b> |
| SATT_HUMAN (P43007) Neutral amino acid transporter A (SATT) (Alanine/serine/cysteine/ threonine transporter) (ASCT1) [MASS=55723]                                                             | 1.00 | 0.57 | *    | *    | 1.00 | 0.42 | <b>2.00</b> | <b>0.50</b> | <b>0.07</b> |
| SBP1_HUMAN (Q13228) Selenium-binding protein 1 [MASS=52313]                                                                                                                                   | *    | *    | 0.25 | 0.18 | 0.92 | 1.21 | <b>2.00</b> | <b>0.70</b> | <b>0.52</b> |
| SCPDH_HUMAN (Q8NBX0) Probable saccharopine dehydrogenase (EC 1.5.1.9) [MASS=47151]                                                                                                            | 1.00 | 1.01 | *    | *    | 0.98 | 1.68 | <b>2.00</b> | <b>1.35</b> | <b>0.34</b> |
| SEPT5_HUMAN (Q99719) Septin-5 (Peanut-like protein 1) (Cell division control-related protein 1) (CDCrel-1) [MASS=42777]                                                                       | 0.97 | 1.16 | *    | *    | 1.00 | 1.56 | <b>2.00</b> | <b>1.36</b> | <b>0.20</b> |
| SEPT7_HUMAN (Q16181) Septin-7 (CDC10 protein homolog) [MASS=50680]                                                                                                                            | 1.00 | 0.93 | *    | *    | 0.99 | 1.06 | <b>2.00</b> | <b>1.00</b> | <b>0.06</b> |
| SF01_HUMAN (Q15637) Splicing factor 1 (Zinc finger protein 162) (Transcription factor ZFM1) (Zinc finger gene in MEN1 locus) (Mammalian branch point-binding protein mBBP) (BBP) [MASS=68198] | 0.27 | 1.47 | *    | *    | 0.00 | 1.46 | <b>2.00</b> | <b>1.47</b> | <b>0.01</b> |
| SFXN1_HUMAN (Q9H9B4) Sideroflexin-1 (Tricarboxylate carrier protein) (TCC) [MASS=35488]                                                                                                       | *    | *    | 0.65 | 1.41 | 0.00 | 1.50 | <b>2.00</b> | <b>1.46</b> | <b>0.04</b> |
| SIRB1_HUMAN (O00241) Signal-regulatory protein beta-1 precursor (SIRP-beta-1) (CD172b antigen) [MASS=43255]                                                                                   | 0.00 | 0.50 | 0.00 | *    | 0.99 | 0.34 | <b>2.00</b> | <b>0.42</b> | <b>0.08</b> |
| SIRT2_HUMAN (Q81XJ6) NAD-dependent deacetylase sirtuin-2 (EC 3.5.1.-) (SIR2-like) (SIR2-like protein 2) [MASS=43182]                                                                          | 0.31 | 1.66 | *    | *    | 0.99 | 0.85 | <b>2.00</b> | <b>1.26</b> | <b>0.41</b> |
| SNG3_HUMAN (O43761) Synaptogyrin-3 [MASS=24555]                                                                                                                                               | 0.00 | 0.90 | *    | *    | 0.98 | 0.68 | <b>2.00</b> | <b>0.79</b> | <b>0.11</b> |
| SODC_HUMAN (P00441) Superoxide dismutase [Cu-Zn] (EC 1.15.1.1) [MASS=15804]                                                                                                                   | 1.00 | 0.70 | *    | *    | 0.99 | 0.70 | <b>2.00</b> | <b>0.70</b> | <b>0.00</b> |

|                                                                                                                                                                                                                                                 |      |      |      |      |      |      |             |             |             |
|-------------------------------------------------------------------------------------------------------------------------------------------------------------------------------------------------------------------------------------------------|------|------|------|------|------|------|-------------|-------------|-------------|
| SSDH_HUMAN (P51649) Succinate semialdehyde dehydrogenase, mitochondrial precursor (EC 1.2.1.24) (NAD(+)-dependent succinic semialdehyde dehydrogenase) [MASS=57214]                                                                             | 0.55 | 1.60 | *    | *    | 1.00 | 1.50 | <b>2.00</b> | <b>1.55</b> | <b>0.05</b> |
| SUCA_HUMAN (P53597) Succinyl-CoA ligase [GDP-forming] alpha-chain, mitochondrial precursor (EC 6.2.1.4) (Succinyl-CoA synthetase, alpha chain) (SCS-alpha) [MASS=35047]                                                                         | 1.00 | 1.20 | *    | *    | 1.00 | 1.16 | <b>2.00</b> | <b>1.18</b> | <b>0.02</b> |
| SUCB1_HUMAN (Q9P2R7) Succinyl-CoA ligase [ADP-forming] beta-chain, mitochondrial precursor (EC 6.2.1.5) (Succinyl-CoA synthetase, betaA chain) (SCS-betaA) (ATP-specific succinyl-CoA synthetase subunit beta) (NY-REN-39 antigen) [MASS=50317] | 0.99 | 1.44 | *    | *    | 1.00 | 1.57 | <b>2.00</b> | <b>1.51</b> | <b>0.07</b> |
| SYIM_HUMAN (Q9NSE4) Isoleucyl-tRNA synthetase, mitochondrial precursor (EC 6.1.1.5) (Isoleucine--tRNA ligase) (IleRS) [MASS=113791]                                                                                                             | *    | *    | 0.95 | 1.40 | 0.00 | 3.31 | <b>2.00</b> | <b>2.36</b> | <b>0.96</b> |
| TERA_HUMAN (P55072) Transitional endoplasmic reticulum ATPase (TER ATPase) (15S Mg(2+)-ATPase p97 subunit) (Valosin-containing protein) (VCP) [MASS=89190]                                                                                      | *    | *    | 0.55 | 0.58 | 0.97 | 0.53 | <b>2.00</b> | <b>0.56</b> | <b>0.03</b> |
| TGT_HUMAN (Q9BXR0) Queuine tRNA-ribosyltransferase (EC 2.4.2.29) (tRNA-guanine transglycosylase) (Guanine insertion enzyme) [MASS=42492]                                                                                                        | 0.00 | 9.90 | *    | *    | 0.00 | 5.12 | <b>2.00</b> | <b>7.51</b> | <b>2.39</b> |
| THY1_HUMAN (P04216) Thy-1 membrane glycoprotein precursor (Thy-1 antigen) (CD90 antigen) (CDw90 antigen) [MASS=17935]                                                                                                                           | *    | *    | 0.91 | 0.55 | 1.00 | 0.55 | <b>2.00</b> | <b>0.55</b> | <b>0.00</b> |
| TIM9_HUMAN (Q9Y5J7) Mitochondrial import inner membrane translocase subunit Tim9 [MASS=10378]                                                                                                                                                   | 0.44 | 1.33 | *    | *    | 1.00 | 1.69 | <b>2.00</b> | <b>1.51</b> | <b>0.18</b> |
| TOM40_HUMAN (O96008) Probable mitochondrial import receptor subunit TOM40 homolog (Translocase of outer membrane 40 kDa subunit homolog) (Haymaker protein) (p38.5) [MASS=37893]                                                                | 0.97 | 1.55 | *    | *    | 0.73 | 1.25 | <b>2.00</b> | <b>1.40</b> | <b>0.15</b> |
| TP53B_HUMAN (Q12888) Tumor suppressor p53-binding protein 1 (p53-binding protein 1) (p53BP1) (53BP1) [MASS=213573]                                                                                                                              | 0.00 | 1.17 | *    | *    | 0.00 | 0.65 | <b>2.00</b> | <b>0.91</b> | <b>0.26</b> |
| TSKS_HUMAN (Q9UJT2) Testis-specific serine kinase substrate (Testis-specific kinase substrate) (STK22 substrate 1) [MASS=65050]                                                                                                                 | 0.22 | 0.76 | *    | *    | 0.00 | 1.33 | <b>2.00</b> | <b>1.05</b> | <b>0.29</b> |
| TXND5_HUMAN (Q8NBS9) Thioredoxin domain-containing protein 5 precursor (Thioredoxin-like protein p46) (Endoplasmic reticulum protein ERp46) [MASS=47629]                                                                                        | 0.75 | 1.31 | *    | *    | 0.98 | 0.82 | <b>2.00</b> | <b>1.07</b> | <b>0.25</b> |
| UCHL1_HUMAN (P09936) Ubiquitin carboxyl-terminal hydrolase isozyme L1 (EC 3.4.19.12) (EC 6.-.-.-) (UCH-L1) (Ubiquitin thioesterase L1) (Neuron cytoplasmic protein 9.5) (PGP 9.5) (PGP9.5) [MASS=24824]                                         | 1.00 | 0.84 | *    | *    | 1.00 | 0.71 | <b>2.00</b> | <b>0.78</b> | <b>0.07</b> |

|                                                                                                                                                                                                                                   |      |      |      |      |      |      |             |             |             |
|-----------------------------------------------------------------------------------------------------------------------------------------------------------------------------------------------------------------------------------|------|------|------|------|------|------|-------------|-------------|-------------|
| UCRH_HUMAN (P07919) Ubiquinol-cytochrome c reductase complex 11 kDa protein, mitochondrial precursor (EC 1.10.2.2) (Mitochondrial hinge protein) (Cytochrome C1, nonheme 11 kDa protein) (Complex III subunit VIII) [MASS=10739]  | 1.00 | 1.75 | *    | *    | 1.00 | 1.62 | <b>2.00</b> | <b>1.69</b> | <b>0.06</b> |
| VA0D_HUMAN (P61421) Vacuolar ATP synthase subunit d (EC 3.6.3.14) (V-ATPase d subunit) (Vacuolar proton pump d subunit) (V-ATPase AC39 subunit) (V-ATPase 40 kDa accessory protein) (P39) (32 kDa accessory protein) [MASS=40329] | 0.67 | 0.69 | *    | *    | 1.00 | 0.53 | <b>2.00</b> | <b>0.61</b> | <b>0.08</b> |
| VATB2_HUMAN (P21281) Vacuolar ATP synthase subunit B, brain isoform (EC 3.6.3.14) (V-ATPase B2 subunit) (Vacuolar proton pump B isoform 2) (Endomembrane proton pump 58 kDa subunit) (HO57) [MASS=56500]                          | 1.00 | 0.96 | *    | *    | 1.00 | 0.92 | <b>2.00</b> | <b>0.94</b> | <b>0.02</b> |
| VDAC3_HUMAN (Q9Y277) Voltage-dependent anion-selective channel protein 3 (VDAC-3) (hVDAC3) (Outer mitochondrial membrane protein porin 3) [MASS=30658]                                                                            | 0.99 | 1.51 | *    | *    | 1.00 | 1.69 | <b>2.00</b> | <b>1.60</b> | <b>0.09</b> |
| VISL1_HUMAN (P62760) Visinin-like protein 1 (VILIP) (Hippocalcin-like protein 3) (HLP3) [MASS=22011]                                                                                                                              | *    | *    | 0.30 | 1.13 | 0.95 | 1.05 | <b>2.00</b> | <b>1.09</b> | <b>0.04</b> |
| ZN142_HUMAN (P52746) Zinc finger protein 142 (HA4654) [MASS=187865]                                                                                                                                                               | 0.00 | 1.48 | *    | *    | 0.00 | 3.16 | <b>2.00</b> | <b>2.32</b> | <b>0.84</b> |

## Table 7. EAD Mitochondrial Study

### Experiment 1

A = Protein Score  
B = Percent Coverage  
C = XPress H2L Ratio  
D = XPress Std. Dev.

E = XPress Peptides  
F = Unique Peptides  
G = Charge  
H = Instances

| Description                                                                                                                                                                                                                                                         | A    | B     | C    | D    | E | F | G | Peptide Sequence                | H |
|---------------------------------------------------------------------------------------------------------------------------------------------------------------------------------------------------------------------------------------------------------------------|------|-------|------|------|---|---|---|---------------------------------|---|
| 1433G_HUMAN (P61981) 14-3-3 protein gamma (Protein kinase C inhibitor protein 1) (KCIP-1) [MASS=28171]                                                                                                                                                              | 1.00 | 7.72  | 1.07 | 0.00 | 2 | 1 | 2 | ELEAVC[339]QDVLSLLDNYLIK        | 1 |
|                                                                                                                                                                                                                                                                     |      |       |      |      |   |   | 2 | ELEAVC[330]QDVLSLLDNYLIK        | 1 |
| 1433T_HUMAN (P27348) 14-3-3 protein theta (14-3-3 protein tau) (14-3-3 protein T-cell) (HS1 protein) [MASS=27764]                                                                                                                                                   | *    | 15.51 | *    | *    | * | 2 | 3 | SIC[330]TTVLELLDKYLIANATNPESK   | 1 |
|                                                                                                                                                                                                                                                                     |      |       |      |      |   |   | 2 | NLLSVAYKNVVGGR                  | 1 |
| 1433Z_HUMAN (P63104) 14-3-3 protein zeta/delta (Protein kinase C inhibitor protein 1) (KCIP-1) [MASS=27745]                                                                                                                                                         | 1.00 | 13.88 | 0.75 | 0.28 | 2 | 2 | 2 | IETELRDIC[330]NDVLSLLEK         | 1 |
|                                                                                                                                                                                                                                                                     |      |       |      |      |   |   | 3 | LAEQAERYDDM[147]AAC[330]M[147]K | 1 |
|                                                                                                                                                                                                                                                                     |      |       |      |      |   |   | 2 | LAEQAERYDDM[147]AAC[330]M[147]K | 1 |
| 2A5A_HUMAN (Q15172) Serine/threonine-protein phosphatase 2A 56 kDa regulatory subunit alpha isoform (PP2A, B subunit, B' alpha isoform) (PP2A, B subunit, B56 alpha isoform) (PP2A, B subunit, PR61 alpha isoform) (PP2A, B subunit, R5 alpha isoform) [MASS=56193] | 0.00 | 6.58  | 2.22 | 0.00 | 1 | 2 | 2 | QFLM[147]KVLIPMHTAK             | 1 |
|                                                                                                                                                                                                                                                                     |      |       |      |      |   |   | 2 | LQQC[339]C[339]ILDFMDSVSDLK     | 1 |
| 2AAA_HUMAN (P30153) Serine/threonine-protein phosphatase 2A 65 kDa regulatory subunit A alpha isoform (PP2A, subunit A, PR65-alpha isoform) (PP2A, subunit A, R1-alpha isoform) (Medium tumor antigen-associated 61 kDa protein) [MASS=65092]                       | *    | 1.87  | *    | *    | * | 1 | 2 | RLAGGDWFTSR                     | 1 |
| 2AAB_HUMAN (P30154) Serine/threonine-protein phosphatase 2A 65 kDa regulatory subunit A beta isoform (PP2A, subunit A, PR65-beta isoform) (PP2A, subunit A, R1-beta isoform) [MASS=66201]                                                                           | *    | 4.33  | *    | *    | * | 1 | 2 | FGTEWAQNTIVPKVLVMANDPNYLHR      | 1 |

|                                                                                                                                                                                                                                                                               |      |       |      |      |    |   |   |                                                  |   |
|-------------------------------------------------------------------------------------------------------------------------------------------------------------------------------------------------------------------------------------------------------------------------------|------|-------|------|------|----|---|---|--------------------------------------------------|---|
| 2ABB_HUMAN (Q00005) Serine/threonine-protein phosphatase 2A 55 kDa regulatory subunit B beta isoform (PP2A, subunit B, B-beta isoform) (PP2A, subunit B, B55-beta isoform) (PP2A, subunit B, PR55-beta isoform) (PP2A, subunit B, R2-beta isoform) [MASS=51710]               | *    | 3.39  | *    | *    | *  | 1 | 2 | DYLTVKVWDLNM[147]ENR                             | 1 |
| 3BP1_HUMAN (Q9Y3L3) SH3 domain-binding protein 1 (3BP-1) [MASS=75713]                                                                                                                                                                                                         | *    | 1.43  | *    | *    | *  | 1 | 1 | ERTESEVPPR                                       | 1 |
| 41_HUMAN (P11171) Protein 4.1 (Band 4.1) (P4.1) (EPB4.1) (4.1R) [MASS=97016]                                                                                                                                                                                                  | 0.00 | 2.66  | 0.62 | 0.00 | 1  | 1 | 3 | FYPDPAQLTEDITRYLVC[330]LQLR                      | 1 |
| 5HT7R_HUMAN (P34969) 5-hydroxytryptamine 7 receptor (5-HT-7) (Serotonin receptor 7) (5-HT-X) (5HT7) [MASS=53555]                                                                                                                                                              | *    | 3.34  | *    | *    | *  | 1 | 2 | EVEEC[339]ANLSRLLKHER                            | 1 |
| A4_HUMAN (P05067) Amyloid beta A4 protein precursor (APP) (ABPP) (Alzheimer disease amyloid protein) (Cerebral vascular amyloid peptide) (CVAP) (Protease nexin-II) (PN-II) (APPI) (PreA4) [Contains: Soluble APP-alpha (S-APP-alpha); Soluble APP-beta (S-APP)] [MASS=86943] | 0.00 | 8.05  | 0.14 | 0.00 | 1  | 2 | 3 | LVFFAEDVGSNKGAIIGLM[147]VGGVVIATVIVITLVM[147]LKK | 1 |
|                                                                                                                                                                                                                                                                               |      |       |      |      |    |   | 2 | ALEVPTDGNAGLLAEPQIAMFC[330]GR                    | 1 |
|                                                                                                                                                                                                                                                                               |      |       |      |      |    |   | 2 | NLDKEYLPIGGLAEFC[339]K                           | 5 |
| AATM_HUMAN (P00505) Aspartate aminotransferase, mitochondrial precursor (EC 2.6.1.1) (Transaminase A) (Glutamate oxaloacetate transaminase 2) [MASS=47475]                                                                                                                    | 1.00 | 13.95 | 1.55 | 0.04 | 12 | 4 | 2 | NLDKEYLPIGGLAEFC[330]K                           | 3 |
|                                                                                                                                                                                                                                                                               |      |       |      |      |    |   | 2 | VGAFTM[147]VC[339]K                              | 2 |
|                                                                                                                                                                                                                                                                               |      |       |      |      |    |   | 2 | HFIEQGIVNC[339]LC[339]QSYAK                      | 2 |
|                                                                                                                                                                                                                                                                               |      |       |      |      |    |   | 2 | SGRFVTVQTISGTGALR                                | 1 |
| ABCA3_HUMAN (Q99758) ATP-binding cassette sub-family A member 3 (ATP-binding cassette transporter 3) (ATP-binding cassette 3) (ABC-C transporter) [MASS=191361]                                                                                                               | *    | 3.52  | *    | *    | *  | 2 | 3 | LSIGIALIAGSKVLILDEPTSGMDAISR                     | 1 |
|                                                                                                                                                                                                                                                                               |      |       |      |      |    |   | 3 | EVLGDLEEFILIFRASVEGGGFNERC[339]LVAASFR           | 1 |

|                                                                                                                                                                                                                                                                              |      |       |      |      |   |   |   |                                 |   |
|------------------------------------------------------------------------------------------------------------------------------------------------------------------------------------------------------------------------------------------------------------------------------|------|-------|------|------|---|---|---|---------------------------------|---|
| ABCAC_HUMAN (Q86UK0) ATP-binding cassette sub-family A member 12 (ATP-binding cassette transporter 12) (ATP-binding cassette 12) [MASS=293249]                                                                                                                               | *    | 2.97  | *    | *    | * | 4 | 2 | TIILSTHHLDEAEVLSDR              | 1 |
|                                                                                                                                                                                                                                                                              |      |       |      |      |   |   | 3 | M[147]LTGDIIPSSGNILIR           | 1 |
|                                                                                                                                                                                                                                                                              |      |       |      |      |   |   | 3 | EQIASKYGIPINTTFFC[339]FSLYK     | 1 |
|                                                                                                                                                                                                                                                                              |      |       |      |      |   |   | 3 | EILNQM[147]ASGTHPLLDKMRSLK      | 1 |
| ACL6B_HUMAN (O94805) Actin-like protein 6B (53 kDa BRG1-associated factor B) (Actin-related protein Baf53b) (ArpNalpha) [MASS=46877]                                                                                                                                         | 0.00 | 4.93  | 1.03 | 0.00 | 1 | 1 | 2 | DGAEVMSPLKNGM[147]IEDWEC[330]FR | 1 |
|                                                                                                                                                                                                                                                                              |      |       |      |      |   |   | 2 | VGLIGSC[339]TNSSYEDM[147]GR     | 1 |
|                                                                                                                                                                                                                                                                              |      |       |      |      |   |   | 3 | VAVPSTIHC[339]DHLIEAQVGGEK      | 2 |
| ACON_HUMAN (Q99798) Aconitate hydratase, mitochondrial precursor (EC 4.2.1.3) (Citrate hydro-lyase) (Aconitase) [MASS=85425]                                                                                                                                                 | 1.00 | 8.85  | 1.44 | 0.08 | 7 | 4 | 2 | WVIGDENYEGSSREHAALPR            | 1 |
|                                                                                                                                                                                                                                                                              |      |       |      |      |   |   | 2 | VAVPSTIHC[330]DHLIEAQVGGEK      | 1 |
|                                                                                                                                                                                                                                                                              |      |       |      |      |   |   | 1 | VAGILTVK                        | 1 |
|                                                                                                                                                                                                                                                                              |      |       |      |      |   |   | 2 | VAVPSTIHC[339]DHLIEAQVGGEK      | 3 |
| ACOT1_HUMAN (Q86TX2) Acyl-coenzyme A thioesterase 1 (EC 3.1.2.2) (Acyl-CoA thioesterase 1) (Inducible cytosolic acyl-coenzyme A thioester hydrolase) (Long chain acyl-CoA thioester hydrolase) (Long chain acyl-CoA hydrolase) (CTE-I) (CTE-Ib) [MASS=46277]                 | 0.00 | 8.55  | 1.43 | 0.00 | 1 | 2 | 3 | IKVTKDGYADIVDLNSPLEGPDQK        | 1 |
|                                                                                                                                                                                                                                                                              |      |       |      |      |   |   | 2 | SEFYANEAC[339]KR                | 1 |
| ACOT9_HUMAN (Q9Y305) Acyl-coenzyme A thioesterase 9 (EC 3.1.2.-) (Acyl-CoA thioesterase 9) (Acyl-CoA thioester hydrolase 9) [MASS=46354]                                                                                                                                     | 0.00 | 13.30 | 2.03 | 0.00 | 1 | 3 | 2 | VLPSNAVWMENSKLKSLEIC[339]HPQER  | 1 |
|                                                                                                                                                                                                                                                                              |      |       |      |      |   |   | 3 | M[147]KDSYIEVLLPLGSEPELR        | 1 |
|                                                                                                                                                                                                                                                                              |      |       |      |      |   |   | 2 | SLEIC[339]HPQER                 | 1 |
| ACOX2_HUMAN (Q99424) Acyl-coenzyme A oxidase 2, peroxisomal (EC 1.17.99.3) (3-alpha,7-alpha,12-alpha-trihydroxy-5-beta-cholestanoyl-CoA 24-hydroxylase) (3-alpha,7-alpha,12-alpha-trihydroxy-5-beta-cholestanoyl-CoA oxidase) (Trihydroxycoprostanoyl-CoA oxid) [MASS=76826] | *    | 1.32  | *    | *    | * | 1 | 3 | VHC[330]YYVTVK                  | 1 |
| ACPM_HUMAN (O14561) Acyl carrier protein, mitochondrial precursor (ACP) (NADH-ubiquinone oxidoreductase 9.6 kDa subunit) (Cl-SDAP) [MASS=17417]                                                                                                                              | 1.00 | 12.18 | 1.61 | 0.05 | 2 | 1 | 3 | LM[147]C[330]PQEIVDYIADKKDVYE   | 1 |
|                                                                                                                                                                                                                                                                              |      |       |      |      |   |   | 2 | LM[147]C[339]PQEIVDYIADKKDVYE   | 1 |



|                                                                                                                                                                                                                                                                 |      |       |      |      |    |   |   |                                                  |   |
|-----------------------------------------------------------------------------------------------------------------------------------------------------------------------------------------------------------------------------------------------------------------|------|-------|------|------|----|---|---|--------------------------------------------------|---|
| ACSL4_HUMAN (O60488) Long-chain-fatty-acid--CoA ligase 4 (EC 6.2.1.3) (Long-chain acyl-CoA synthetase 4) (LACS 4) [MASS=79188]                                                                                                                                  | *    | 7.31  | *    | *    | *  | 2 | 3 | PKGVM[147]M[147]HHSNLIAGMTGQC[339]ERIPGLGPK      | 1 |
|                                                                                                                                                                                                                                                                 |      |       |      |      |    |   | 3 | GVEGTWVDIC[330]NNPAMEAEILKEIR                    | 1 |
|                                                                                                                                                                                                                                                                 |      |       |      |      |    |   | 3 | C[330]PEALFQPSFLGM[147]ESC[330]GIHETTFNSIM[147]K | 3 |
|                                                                                                                                                                                                                                                                 |      |       |      |      |    |   | 2 | C[330]DVIDIRK                                    | 3 |
| ACTB_HUMAN (P60709) Actin, cytoplasmic 1 (Beta-actin) [MASS=41736]                                                                                                                                                                                              | 1.00 | 15.47 | 0.61 | 0.15 | 12 | 3 | 2 | C[339]DVIDIRK                                    | 2 |
|                                                                                                                                                                                                                                                                 |      |       |      |      |    |   | 2 | LC[330]YVALDFEQEM[147]ATAASSSSLEK                | 1 |
|                                                                                                                                                                                                                                                                 |      |       |      |      |    |   | 3 | C[330]PEALFQPSFLGM[147]ESC[330]GIHETTFNSIMK      | 1 |
|                                                                                                                                                                                                                                                                 |      |       |      |      |    |   | 3 | C[339]PEALFQPSFLGM[147]ESC[339]GIHETTFNSIM[147]K | 1 |
|                                                                                                                                                                                                                                                                 |      |       |      |      |    |   | 3 | LC[330]YVALDFEQEM[147]ATAASSSSLEK                | 1 |
| ACTY_HUMAN (P42025) Beta-centractin (Actin-related protein 1B) (ARP1B) [MASS=42293]                                                                                                                                                                             | *    | 10.90 | *    | *    | *  | 2 | 2 | ERAC[339]YLSINPQK                                | 1 |
|                                                                                                                                                                                                                                                                 |      |       |      |      |    |   | 3 | AAEVFFETFNVPALFISMQAVLSLYATGR                    | 1 |
| ACTZ_HUMAN (P61163) Alpha-centractin (Centractin) (Centrosome-associated actin homolog) (Actin-RPV) (ARP1) [MASS=42613]                                                                                                                                         | *    | 18.62 | *    | *    | *  | 3 | 3 | PDLIGEESEGIHEVLVFAIQKSDM[147]DLR                 | 1 |
|                                                                                                                                                                                                                                                                 |      |       |      |      |    |   | 2 | HVRVM[147]AGALEGDIFIGPKAEEHR                     | 1 |
|                                                                                                                                                                                                                                                                 |      |       |      |      |    |   | 2 | ERAC[330]YLSINPQKDELTETEK                        | 1 |
| ACVR1_HUMAN (Q04771) Activin receptor type-1 precursor (EC 2.7.11.30) (Activin receptor type I) (ACTR-I) (Serine/threonine-protein kinase receptor R1) (SKR1) (Activin receptor-like kinase 2) (ALK-2) (TGF-B superfamily receptor type I) (TSR-I) [MASS=57153] | 0.00 | 6.29  | 2.15 | 0.00 | 1  | 2 | 3 | QITLLEC[330]VGKGR                                | 1 |
|                                                                                                                                                                                                                                                                 |      |       |      |      |    |   | 3 | YM[147]APEVLDETIQVDC[339]FDSYK                   | 1 |
| ADA12_HUMAN (O43184) ADAM 12 precursor (EC 3.4.24.-) (A disintegrin and metalloproteinase domain 12) (Meltrin alpha) [MASS=99641]                                                                                                                               | *    | 3.30  | *    | *    | *  | 1 | 2 | SVRGSC[339]GSHHNTPNLAAKNVFPPTSQTWAR              | 1 |
| ADA18_HUMAN (Q9Y3Q7) ADAM 18 precursor (A disintegrin and metalloproteinase domain 18) (Transmembrane metalloproteinase-like, disintegrin-like, and cysteine-rich protein III) (tMDC III) [MASS=82856]                                                          | *    | 5.82  | *    | *    | *  | 2 | 2 | IVQVIGLVNTMFTQFK                                 | 1 |
|                                                                                                                                                                                                                                                                 |      |       |      |      |    |   | 3 | SDGTDNAYVADGTMC[339]GPPEM[147]YC[339]VNKTC[339]R | 1 |

|                                                                                                                                                                                                                                                                              |      |       |      |      |   |   |             |                                                                                      |             |
|------------------------------------------------------------------------------------------------------------------------------------------------------------------------------------------------------------------------------------------------------------------------------|------|-------|------|------|---|---|-------------|--------------------------------------------------------------------------------------|-------------|
| ADA23_HUMAN (O75077) ADAM 23 precursor (A disintegrin and metalloproteinase domain 23) (Metalloproteinase-like, disintegrin-like, and cysteine-rich protein 3) (MDC-3) [MASS=91926]                                                                                          | *    | 3.85  | *    | *    | * | 2 | 3<br>2      | C[330]LQIQALNM[147]SSC[330]PLDSK<br>RSSLSYFGGVC[339]SRTR                             | 1<br>1      |
| ADAM2_HUMAN (Q99965) ADAM 2 precursor (A disintegrin and metalloproteinase domain 2) (Fertilin subunit beta) (PH-30) (PH30) [MASS=82457]                                                                                                                                     | *    | 4.35  | *    | *    | * | 1 | 3           | VFQLIGLTNAIFVSFNITILSSLELWIDENK                                                      | 1           |
| ADAM8_HUMAN (P78325) ADAM 8 precursor (EC 3.4.24.-) (A disintegrin and metalloproteinase domain 8) (Cell surface antigen MS2) (CD156a antigen) (CD156) [MASS=88673]                                                                                                          | *    | 1.70  | *    | *    | * | 1 | 2           | VC[330]WKGRC[330]QDLHVYR                                                             | 1           |
| ADCY5_HUMAN (O95622) Adenylate cyclase type 5 (EC 4.6.1.1) (Adenylate cyclase type V) (ATP pyrophosphate-lyase 5) (Adenylyl cyclase 5) (Fragment) [MASS=100876]                                                                                                              | 0.00 | 5.15  | 3.54 | 0.00 | 1 | 2 | 2<br>2      | MNSTLVGVFTITLVFLAAFVNM[147]FTC[339]NSR<br>THIKALADFAMKLMQMK                          | 1<br>1      |
| ADCY6_HUMAN (O43306) Adenylate cyclase type 6 (EC 4.6.1.1) (Adenylate cyclase type VI) (ATP pyrophosphate-lyase 6) (Ca(2+)-inhibitable adenylyl cyclase) [MASS=130615]                                                                                                       | *    | 1.37  | *    | *    | * | 1 | 3           | IGLNM[147]GPVVAGVIGAR                                                                | 1           |
| ADDA_HUMAN (P35611) Alpha-adducin (Erythrocyte adducin subunit alpha) [MASS=80955]                                                                                                                                                                                           | *    | 8.41  | *    | *    | * | 3 | 2<br>3<br>3 | GSEENLDEAREQKEK<br>VSM[147]ILQSPAFC[330]EELESMIQEQFKK<br>M[147]NGDSRAAVVTSPPTTAPHKER | 1<br>1<br>1 |
| ADDB_HUMAN (P35612) Beta-adducin (Erythrocyte adducin subunit beta) [MASS=80722]                                                                                                                                                                                             | 0.33 | 5.52  | 1.24 | 0.00 | 1 | 2 | 2<br>2      | C[330]IHLHTPATAAVSAM[147]K<br>DKTESVTSGPM[147]SPEGSPSKSPSK                           | 1<br>1      |
| ADIPO_HUMAN (Q15848) Adiponectin precursor (Adipocyte, C1q and collagen domain-containing protein) (30 kDa adipocyte complement-related protein) (Adipocyte complement-related 30 kDa protein) (ACRP30) (Adipose most abundant gene transcript 1) (apM-1) (Gel [MASS=26413]) | *    | 11.89 | *    | *    | * | 2 | 1<br>3      | DGTPGEK<br>GAC[339]TGWM[147]AGIPGHPGHNGAPGR                                          | 3<br>1      |

|                                                                                                                                                                                                                                |      |       |      |      |    |   |   |                                            |   |
|--------------------------------------------------------------------------------------------------------------------------------------------------------------------------------------------------------------------------------|------|-------|------|------|----|---|---|--------------------------------------------|---|
| ADO_HUMAN (Q06278) Aldehyde oxidase (EC 1.2.3.1) [MASS=147930]                                                                                                                                                                 | *    | 5.83  | *    | *    | *  | 5 | 2 | YIQDIVASTLKL PANKVMC[330]HVR               | 1 |
|                                                                                                                                                                                                                                |      |       |      |      |    |   | 2 | QAQRQENALAI VNSGM[147]R                    | 1 |
|                                                                                                                                                                                                                                |      |       |      |      |    |   | 2 | VMC[339]HVRR                               | 1 |
|                                                                                                                                                                                                                                |      |       |      |      |    |   | 2 | PERKLEYGNVDEAFK                            | 1 |
|                                                                                                                                                                                                                                |      |       |      |      |    |   | 3 | C[330]RGWAC[339]RTNLPSNTAFR                | 1 |
| ADRO_HUMAN (P22570) NADPH:adrenodoxin oxidoreductase, mitochondrial precursor (EC 1.18.1.2) (Adrenodoxin reductase) (AR) (Ferredoxin reductase) (Ferredoxin--NADP(+) reductase) [MASS=53836]                                   | 0.00 | 6.11  | 0.57 | 0.00 | 1  | 1 | 3 | WWGWSAWPRTLPPAGSTPSFC[330]HHFSTQEK         | 1 |
|                                                                                                                                                                                                                                |      |       |      |      |    |   | 2 | EFHGLGDC[339]IIK                           | 4 |
|                                                                                                                                                                                                                                |      |       |      |      |    |   | 1 | EFHGLGDC[339]IIK                           | 3 |
|                                                                                                                                                                                                                                |      |       |      |      |    |   | 2 | M[147]M[147]M[147]QSGRKGADIMYTGTVDC[330]WR | 1 |
|                                                                                                                                                                                                                                |      |       |      |      |    |   | 2 | YFAGNLASGGAAGATSLC[339]FVYPLDFAR           | 5 |
| ADT1_HUMAN (P12235) ADP/ATP translocase 1 (Adenine nucleotide translocator 1) (ANT 1) (ADP,ATP carrier protein 1) (Solute carrier family 25 member 4) (ADP,ATP carrier protein, heart/skeletal muscle isoform T1) [MASS=32933] | 1.00 | 20.20 | 1.86 | 0.04 | 11 | 3 | 2 | EFHGLGDC[330]IIK                           | 3 |
|                                                                                                                                                                                                                                |      |       |      |      |    |   | 1 | EFHGLGDC[330]IIK                           | 2 |
|                                                                                                                                                                                                                                |      |       |      |      |    |   | 3 | YFAGNLASGGAAGATSLC[339]FVYPLDFAR           | 5 |
|                                                                                                                                                                                                                                |      |       |      |      |    |   | 3 | YFAGNLASGGAAGATSLC[330]FVYPLDFAR           | 1 |
|                                                                                                                                                                                                                                |      |       |      |      |    |   | 1 | GLGDC[330]LVK                              | 1 |
| ADT2_HUMAN (P05141) ADP/ATP translocase 2 (Adenine nucleotide translocator 2) (ANT 2) (ADP,ATP carrier protein 2) (Solute carrier family 25 member 5) (ADP,ATP carrier protein, fibroblast isoform) [MASS=32764]               | 1.00 | 2.69  | 0.05 | 0.00 | 1  | 1 | 2 | GLGDC[339]LVK                              | 1 |
|                                                                                                                                                                                                                                |      |       |      |      |    |   | 1 | GLGDC[330]LVK                              | 1 |

|                                                                                                                                                                                                                                                                               |      |      |      |      |   |    |   |                                       |   |
|-------------------------------------------------------------------------------------------------------------------------------------------------------------------------------------------------------------------------------------------------------------------------------|------|------|------|------|---|----|---|---------------------------------------|---|
| AKA11_HUMAN (Q9UKA4) A-kinase anchor protein 11 (Protein kinase A-anchoring protein 11) (PRKA11) (A kinase anchor protein 220 kDa) (AKAP 220) (hAKAP220) [MASS=210511]                                                                                                        | 0.00 | 2.95 | 1.12 | 0.00 | 1 | 3  | 3 | LRIDFIFLLSKYATGIR                     | 1 |
|                                                                                                                                                                                                                                                                               |      |      |      |      |   |    | 2 | SGYEEDNEC[339]HVTPELPK                | 1 |
|                                                                                                                                                                                                                                                                               |      |      |      |      |   |    | 2 | MFPVPSSQVKTNKELLMFSNK                 | 1 |
| AKAP9_HUMAN (Q99996) A-kinase anchor protein 9 (Protein kinase A-anchoring protein 9) (PRKA9) (A-kinase anchor protein 450 kDa) (AKAP 450) (A-kinase anchor protein 350 kDa) (AKAP 350) (hgAKAP 350) (AKAP 120-like protein) (Protein hyperion) (Protein yotia) [MASS=453664] | *    | 4.70 | *    | *    | * | 10 | 3 | KVENSNKEEIQEK                         | 1 |
|                                                                                                                                                                                                                                                                               |      |      |      |      |   |    | 3 | ELEIIHNHRAENVQSC[330]DTQVSSLLDGVTMTSR | 1 |
|                                                                                                                                                                                                                                                                               |      |      |      |      |   |    | 2 | NDSLLQTLSPDSEHVTLKR                   | 1 |
|                                                                                                                                                                                                                                                                               |      |      |      |      |   |    | 1 | PTNLLR                                | 2 |
|                                                                                                                                                                                                                                                                               |      |      |      |      |   |    | 2 | DLETQIEC[330]LMSDQEC[339]VKR          | 1 |
|                                                                                                                                                                                                                                                                               |      |      |      |      |   |    | 3 | LLEAISETSSQLEHAKVTQTELMRESFR          | 1 |
|                                                                                                                                                                                                                                                                               |      |      |      |      |   |    | 2 | NTELM[147]DLRQQNQALEKQLEK             | 1 |
|                                                                                                                                                                                                                                                                               |      |      |      |      |   |    | 2 | EETEFLSIHSQM[147]TNLEDIDVNHK          | 1 |
|                                                                                                                                                                                                                                                                               |      |      |      |      |   |    | 2 | AVIQC[330]LR                          | 1 |
|                                                                                                                                                                                                                                                                               |      |      |      |      |   |    | 2 | SLLSEIQALHAQM[147]NGR                 | 1 |
| AKT1_HUMAN (P31749) RAC-alpha serine/threonine-protein kinase (EC 2.7.11.1) (RAC-PK-alpha) (Protein kinase B) (PKB) (C-AKT) [MASS=55686]                                                                                                                                      | 0.64 | 3.75 | *    | *    | * | 1  | 2 | AVDWWGLGVVMYEMMC[330]GR               | 1 |
| AKT2_HUMAN (P31751) RAC-beta serine/threonine-protein kinase (EC 2.7.11.1) (RAC-PK-beta) (Protein kinase Akt-2) (Protein kinase B, beta) (PKB beta) [MASS=55768]                                                                                                              | 0.64 | 1.87 | 0.50 | 0.00 | 1 | 1  | 2 | PRPNTFVIR                             | 1 |
| AKT3_HUMAN                                                                                                                                                                                                                                                                    | 0.64 | 5.01 | *    | *    | * | 1  | 3 | EKPQDVDLPYPLNNFSVAKC[339]QLMK         | 1 |
| AL7A1_HUMAN (P49419) Aldehyde dehydrogenase family 7 member A1 (EC 1.2.1.3) (Antiquitin-1) [MASS=55235]                                                                                                                                                                       | *    | 1.76 | *    | *    | * | 1  | 2 | IWADIPAPK                             | 1 |
| ALBU_HUMAN (P02768) Serum albumin precursor [MASS=69366]                                                                                                                                                                                                                      | 1.00 | 8.21 | 0.67 | 0.06 | 3 | 3  | 3 | LVRPEVDVM[147]C[330]TAFHDNEETFLKK     | 1 |
|                                                                                                                                                                                                                                                                               |      |      |      |      |   |    | 2 | AVM[147]DDFAAFVEKC[339]C[339]K        | 1 |
|                                                                                                                                                                                                                                                                               |      |      |      |      |   |    | 2 | LKEC[330]C[330]EKPLLEK                | 2 |
| ALDH2_HUMAN (P05091) Aldehyde dehydrogenase, mitochondrial precursor (EC 1.2.1.3) (ALDH class 2) (ALDH1) (ALDH-E2) [MASS=56381]                                                                                                                                               | 1.00 | 7.35 | 1.49 | 0.10 | 2 | 2  | 3 | KTFPTVNPSTGEVIC[339]QVAEGDKEDVDK      | 1 |
|                                                                                                                                                                                                                                                                               |      |      |      |      |   |    | 2 | LLC[339]GGGIAADR                      | 1 |

|                                                                                                                                                                                                                                |      |       |      |      |   |   |  |   |                                                    |   |
|--------------------------------------------------------------------------------------------------------------------------------------------------------------------------------------------------------------------------------|------|-------|------|------|---|---|--|---|----------------------------------------------------|---|
|                                                                                                                                                                                                                                |      |       |      |      |   |   |  | 3 | ALSDHHIYLEGTLTKPNM[147]VTPGHAC[330]TQK             | 1 |
|                                                                                                                                                                                                                                |      |       |      |      |   |   |  | 3 | YASIC[330]QQNGIVPIVEPEILPDGDHDLKR                  | 2 |
| ALDOA_HUMAN (P04075) Fructose-bisphosphate aldolase A (EC 4.1.2.13) (Muscle-type aldolase) (Lung cancer antigen NY-LU-1) [MASS=39289]                                                                                          | 1.00 | 25.90 | 0.67 | 0.15 | 7 | 4 |  | 3 | YASIC[330]QQNGIVPIVEPEILPDGDHDLK                   | 2 |
|                                                                                                                                                                                                                                |      |       |      |      |   |   |  | 2 | ALANSLAC[330]QGK                                   | 2 |
|                                                                                                                                                                                                                                |      |       |      |      |   |   |  | 3 | YASIC[339]QQNGIVPIVEPEILPDGDHDLK                   | 1 |
|                                                                                                                                                                                                                                |      |       |      |      |   |   |  | 2 | SLSINVLGNKEVMDTTK                                  | 1 |
|                                                                                                                                                                                                                                |      |       |      |      |   |   |  | 2 | EKPGIFYQQTLPESHLPK                                 | 1 |
| ALMS1_HUMAN (Q8TCU4) Alstrom syndrome protein 1 [MASS=460933]                                                                                                                                                                  | *    | 2.45  | *    | *    | * | 5 |  | 3 | EIQISDNHTLISMGRPSSTLGVNRSSSR                       | 1 |
|                                                                                                                                                                                                                                |      |       |      |      |   |   |  | 2 | VSMALLETLRQYQAAKSVM[147]R                          | 1 |
|                                                                                                                                                                                                                                |      |       |      |      |   |   |  | 2 | IPKDC[330]DRYDDL[339]SYM[147]SWK                   | 1 |
|                                                                                                                                                                                                                                |      |       |      |      |   |   |  | 3 | PXXXFFXDGVS[330]R                                  | 1 |
| ALU8_HUMAN (P39195) Alu subfamily SX sequence contamination warning entry [MASS=64492]                                                                                                                                         | *    | 4.57  | *    | *    | * | 2 |  | 3 | AC[330]NPSYSGGXGRR                                 | 1 |
|                                                                                                                                                                                                                                |      |       |      |      |   |   |  | 3 | AC[339]NPSYSGGXGRR                                 | 1 |
| AMOL1_HUMAN (Q8IY63) Angiotensin-like protein 1 [MASS=106573]                                                                                                                                                                  | 0.00 | 3.24  | 1.99 | 0.00 | 1 | 2 |  | 3 | LSTTPAHSPVLKHPAAK                                  | 1 |
|                                                                                                                                                                                                                                |      |       |      |      |   |   |  | 2 | LQALTQLQSAC[339]EK                                 | 1 |
| AMPB_HUMAN (Q9H4A4) Aminopeptidase B (EC 3.4.11.6) (Ap-B) (Arginyl aminopeptidase) (Arginine aminopeptidase) [MASS=72595]                                                                                                      | *    | 6.15  | *    | *    | * | 2 |  | 3 | RPLHSAQAVDVASASNFR                                 | 1 |
|                                                                                                                                                                                                                                |      |       |      |      |   |   |  | 2 | WLNTPGWPPYLPDLSPGD[147]K                           | 1 |
| AMPD1_HUMAN (P23109) AMP deaminase 1 (EC 3.5.4.6) (Myoadenylate deaminase) (AMP deaminase isoform M) [MASS=86489]                                                                                                              | 0.00 | 2.01  | 0.14 | 0.00 | 1 | 1 |  | 2 | NSVLQC[330]GISHEEKVK                               | 1 |
| AMYC_HUMAN (P19961) Alpha-amylase 2B precursor (EC 3.2.1.1) (1,4-alpha-D-glucan glucanohydrolase) (Alpha-amylase carcinoid) [MASS=57709]                                                                                       | 0.00 | 3.52  | 1.60 | 0.00 | 1 | 1 |  | 2 | DFPAVPYSGWDFNDGK[339]K                             | 1 |
| ANAG_HUMAN (P54802) Alpha-N-acetylglucosaminidase precursor (EC 3.2.1.50) (N-acetyl-alpha-glucosaminidase) (NAG) [Contains: Alpha-N-acetylglucosaminidase 82 kDa form; Alpha-N-acetylglucosaminidase 77 kDa form] [MASS=82166] | 0.00 | 10.77 | 1.77 | 0.00 | 1 | 3 |  | 2 | YYQNV[339]TQSYFVWWDWAR                             | 1 |
|                                                                                                                                                                                                                                |      |       |      |      |   |   |  | 3 | M[147]EAVAVAAA[V]GVL[147]LAGAGGAAGDEAREAAV[R]ALVAR | 1 |
|                                                                                                                                                                                                                                |      |       |      |      |   |   |  | 3 | LFLEALVDSVAQGIPFQHQFDK                             | 1 |
| ANFY1_HUMAN (Q9P2R3) Ankyrin repeat and FYVE domain-containing protein 1 (Ankyrin repeats hooked to a zinc finger motif) [MASS=128398]                                                                                         | *    | 2.57  | *    | *    | * | 2 |  | 3 | ENAAAIFDLFLEC[339]MPGYPLDK                         | 1 |
|                                                                                                                                                                                                                                |      |       |      |      |   |   |  | 3 | KHHC[330]RHC[330]GR                                | 1 |

|                                                                                                                                                                                                                                                                              |      |      |      |      |   |   |   |                                       |   |
|------------------------------------------------------------------------------------------------------------------------------------------------------------------------------------------------------------------------------------------------------------------------------|------|------|------|------|---|---|---|---------------------------------------|---|
| ANK2_HUMAN (Q01484) Ankyrin-2 (Brain ankyrin) (Ankyrin-B) (Ankyrin, nonerythroid) [MASS=430341]                                                                                                                                                                              | *    | 2.96 | *    | *    | * | 6 | 2 | AEEEEPGEPFEIVERVKEDLEK                | 1 |
|                                                                                                                                                                                                                                                                              |      |      |      |      |   |   | 3 | NGYTPLHIAAKK                          | 1 |
|                                                                                                                                                                                                                                                                              |      |      |      |      |   |   | 2 | GETALHM[147]AARAGQVEVRC[339]LLR       | 1 |
|                                                                                                                                                                                                                                                                              |      |      |      |      |   |   | 3 | QGVTPLHLASQEGHTDMVTLKDKGANIHMSTK      | 1 |
|                                                                                                                                                                                                                                                                              |      |      |      |      |   |   | 2 | EDAAGGKEK                             | 1 |
|                                                                                                                                                                                                                                                                              |      |      |      |      |   |   | 3 | GGTSPTKESKEHFFDL YR                   | 1 |
| ANKR5_HUMAN (Q9NU02) Ankyrin repeat domain-containing protein 5 [MASS=86664]                                                                                                                                                                                                 | *    | 8.89 | *    | *    | * | 4 | 2 | DVC[339]LTFLEKGANPNAINSSTGR           | 1 |
|                                                                                                                                                                                                                                                                              |      |      |      |      |   |   | 2 | FTHEVDFDDFM[147]MPFQKNITEKAR          | 1 |
|                                                                                                                                                                                                                                                                              |      |      |      |      |   |   | 2 | YLLDIGAKFQLENR                        | 1 |
|                                                                                                                                                                                                                                                                              |      |      |      |      |   |   | 2 | ARALEAALKT                            | 1 |
| ANR11_HUMAN (Q6UB99) Ankyrin repeat domain-containing protein 11 (Ankyrin repeat-containing cofactor 1) [MASS=298068]                                                                                                                                                        | *    | 2.21 | *    | *    | * | 4 | 2 | FC[330]SSESESESESGEDDRSLGSSGC[339]LK  | 1 |
|                                                                                                                                                                                                                                                                              |      |      |      |      |   |   | 2 | VFEKHKEK                              | 1 |
|                                                                                                                                                                                                                                                                              |      |      |      |      |   |   | 2 | APQQEELPLSSDMVEK                      | 1 |
|                                                                                                                                                                                                                                                                              |      |      |      |      |   |   | 1 | HADGLLR                               | 1 |
| ANR33_HUMAN (Q7Z3H0) Ankyrin repeat domain-containing protein 33 [MASS=29083]                                                                                                                                                                                                | 0.00 | 7.72 | 0.69 | 0.00 | 1 | 1 | 2 | C[330]EC[330]VATLLM[147]AGADLTA VDPVR | 1 |
| ANXA2_HUMAN (P07355) Annexin A2 (Annexin II) (Lipocortin II) (Calpactin I heavy chain) (Chromobindin-8) (p36) (Protein I) (Placental anticoagulant protein IV) (PAP-IV) [MASS=38473]                                                                                         | 0.93 | 7.10 | 1.63 | 0.00 | 1 | 1 | 3 | GDLENAFLNLVQC[339]IQNKPLYFADR         | 1 |
| ANXA6_HUMAN (P08133) Annexin A6 (Annexin VI) (Lipocortin VI) (P68) (P70) (Protein III) (Chromobindin-20) (67 kDa calelectrin) (Calphobindin-II) (CPB-II) [MASS=75742]                                                                                                        | 0.00 | 3.57 | 1.38 | 0.00 | 1 | 2 | 2 | LIVGLM[147]RPPAYC[339]DAK             | 1 |
|                                                                                                                                                                                                                                                                              |      |      |      |      |   |   | 1 | NKPLFFADK                             | 1 |
| AOFA_HUMAN (P21397) Amine oxidase [flavin-containing] A (EC 1.4.3.4) (Monoamine oxidase type A) (MAO-A) [MASS=59681]                                                                                                                                                         | *    | 7.78 | *    | *    | * | 3 | 3 | KFVGGSGQVSERIM[147]DLLGDQVK           | 1 |
|                                                                                                                                                                                                                                                                              |      |      |      |      |   |   | 1 | IC[339]ELYAK                          | 1 |
|                                                                                                                                                                                                                                                                              |      |      |      |      |   |   | 3 | IFSVTNGGQERK                          | 1 |
| AOFB_HUMAN (P27338) Amine oxidase [flavin-containing] B (EC 1.4.3.4) (Monoamine oxidase type B) (MAO-B) [MASS=58631]                                                                                                                                                         | 0.21 | 1.16 | 1.33 | 0.00 | 1 | 1 | 1 | C[339]IVYYK                           | 1 |
| AP1B1_HUMAN (Q10567) AP-1 complex subunit beta-1 (Adapter-related protein complex 1 beta-1 subunit) (Beta-adaptin 1) (Adaptor protein complex AP-1 beta-1 subunit) (Golgi adaptor HA1/AP1 adaptin beta subunit) (Clathrin assembly protein complex 1 beta larg [MASS=104606] | *    | 4.11 | *    | *    | * | 2 | 3 | DIPNENEAQFQIRDC[330]PLNAEAASSK        | 1 |
|                                                                                                                                                                                                                                                                              |      |      |      |      |   |   | 3 | GEIFELKAELNSDK                        | 1 |

|                                                                                                                                                                                                                                                                              |      |      |      |      |   |   |   |                                             |   |
|------------------------------------------------------------------------------------------------------------------------------------------------------------------------------------------------------------------------------------------------------------------------------|------|------|------|------|---|---|---|---------------------------------------------|---|
| AP2A1_HUMAN (O95782) AP-2 complex subunit alpha-1 (Adapter-related protein complex 2 alpha-1 subunit) (Alpha-adaptin A) (Adaptor protein complex AP-2 alpha-1 subunit) (Clathrin assembly protein complex 2 alpha-A large chain) (100 kDa coated vesicle prote [MASS=107554] | *    | 1.94 | *    | *    | * | 1 | 2 | LVEC[339]LETVLNKAQEPPKSK                    | 1 |
| AP2A2_HUMAN (O94973) AP-2 complex subunit alpha-2 (Adapter-related protein complex 2 alpha-2 subunit) (Alpha-adaptin C) (Adaptor protein complex AP-2 alpha-2 subunit) (Clathrin assembly protein complex 2 alpha-C large chain) (100 kDa coated vesicle prote [MASS=103960] | *    | 2.98 | *    | *    | * | 1 | 2 | SNAPQIVAEMLSYLETADYSIREEIVLK                | 1 |
| APCD1_HUMAN (Q8J025) Protein APCDD1 precursor (Adenomatosis polyposis coli down-regulated 1 protein) [MASS=58796]                                                                                                                                                            | 0.00 | 5.45 | 1.80 | 0.00 | 1 | 1 | 3 | HLHNGARITVQM[147]PPTIEGHWWSTGC[339]EVR      | 1 |
| APMAP_HUMAN (Q9HDC9) Adipocyte plasma membrane-associated protein (BSCv protein) [MASS=46480]                                                                                                                                                                                | *    | 9.86 | *    | *    | * | 2 | 1 | VYVSGLM[147]K                               | 1 |
|                                                                                                                                                                                                                                                                              |      |      |      |      |   |   | 2 | GGADLFVENM[147]PGFDPNIRPSSSGGYWVGM[147]STIR | 1 |
| APOH_HUMAN (P02749) Beta-2-glycoprotein 1 precursor (Beta-2-glycoprotein I) (Apolipoprotein H) (Apo-H) (B2GPI) (Beta(2)GPI) (Activated protein C-binding protein) (APC inhibitor) (Anticardiolipin cofactor) [MASS=38298]                                                    | 0.00 | 4.06 | 0.85 | 0.00 | 1 | 1 | 2 | VC[339]PFAGILENGAVR                         | 3 |
| ARHG2_HUMAN (Q92974) Rho/Rac guanine nucleotide exchange factor 2 (GEF-H1 protein) (Proliferating cell nucleolar antigen p40) [MASS=101173]                                                                                                                                  | *    | 6.27 | *    | *    | * | 3 | 3 | DARYTNGHLFTTISVSGM[147]TMC[330]YAC[330]NK   | 1 |
|                                                                                                                                                                                                                                                                              |      |      |      |      |   |   | 2 | HGVQEC[330]ILLVTQR                          | 1 |
|                                                                                                                                                                                                                                                                              |      |      |      |      |   |   | 2 | MDPRAQTPVPGKGPFR                            | 1 |
| ARI1B_HUMAN (Q8NFD5) AT-rich interactive domain-containing protein 1B (ARID domain-containing protein 1B) (Osa homolog 2) (hOsa2) (p250R) (BRG1-binding protein hELD/OSA1) (BRG1-associated factor 250b) (BAF250B) [MASS=236122]                                             | 0.00 | 5.86 | 7.38 | 0.00 | 1 | 8 | 3 | NSM[147]TPNAPYQQGMSMPDVM[147]GRM[147]PYEPNK | 1 |
|                                                                                                                                                                                                                                                                              |      |      |      |      |   |   | 2 | C[330]IC[330]VSNIVR                         | 1 |
|                                                                                                                                                                                                                                                                              |      |      |      |      |   |   | 3 | HMDGMYGPPAKR                                | 1 |
|                                                                                                                                                                                                                                                                              |      |      |      |      |   |   | 3 | KC[339]LIDIFGILMEYEVGDPSQK                  | 1 |
|                                                                                                                                                                                                                                                                              |      |      |      |      |   |   | 2 | SGGSEAALK                                   | 1 |
|                                                                                                                                                                                                                                                                              |      |      |      |      |   |   | 3 | RHM[147]DGM[147]YGPPAKR                     | 1 |
|                                                                                                                                                                                                                                                                              |      |      |      |      |   |   | 3 | EQEGKGDSEEQEK                               | 1 |
|                                                                                                                                                                                                                                                                              |      |      |      |      |   |   | 3 | M[147]QKVMPTVPTSQVTGPPPQPPIRR               | 1 |

|                                                                                                                                                                                                                                                                              |      |       |      |      |   |   |   |                                            |   |
|------------------------------------------------------------------------------------------------------------------------------------------------------------------------------------------------------------------------------------------------------------------------------|------|-------|------|------|---|---|---|--------------------------------------------|---|
| ARI4A_HUMAN (P29374) AT-rich interactive domain-containing protein 4A (ARID domain-containing protein 4A) (Retinoblastoma-binding protein 1) (RBBP-1) [MASS=142666]                                                                                                          | 0.00 | 4.61  | 2.37 | 0.00 | 1 | 3 | 3 | EETESKC[330]DSEGEDEEDM[147]EPC[330]LTGTKVK | 1 |
|                                                                                                                                                                                                                                                                              |      |       |      |      |   |   | 3 | LVYHQGGC[339]DNIDSGAVWK                    | 1 |
|                                                                                                                                                                                                                                                                              |      |       |      |      |   |   | 2 | ISFLQEKLQEIR                               | 1 |
| ARID2_HUMAN (Q68CP9) AT-rich interactive domain-containing protein 2 (ARID domain-containing protein 2) (BRG1-associated factor 200) (BAF200) [MASS=197390]                                                                                                                  | *    | 2.13  | *    | *    | * | 2 | 3 | VEDSSSNGQAHHVVGKVR                         | 1 |
|                                                                                                                                                                                                                                                                              |      |       |      |      |   |   | 3 | NLSFEEGNVKLLAANRTC[330]LR                  | 1 |
| ARMX2_HUMAN (Q7L311) Armadillo repeat-containing X-linked protein 2 (Protein ALEX2) (ARM protein lost in epithelial cancers on chromosome X 2) [MASS=65683]                                                                                                                  | 0.00 | 7.44  | 0.14 | 0.00 | 1 | 2 | 2 | EKALM[147]AM[147]NNLSENYENQGR              | 1 |
|                                                                                                                                                                                                                                                                              |      |       |      |      |   |   | 3 | SDDPFIQQVALLTSLNNANYSVC[330]NQETIR         | 1 |
| ARMX3_HUMAN (Q9UH62) Armadillo repeat-containing X-linked protein 3 (Protein ALEX3) (ARM protein lost in epithelial cancers on chromosome X 3) [MASS=42500]                                                                                                                  | *    | 4.49  | *    | *    | * | 1 | 3 | RLKVYMNQVC[339]DDTITSR                     | 3 |
| ARTS1_HUMAN (Q9NZ08) Adipocyte-derived leucine aminopeptidase precursor (EC 3.4.11.-) (A-LAP) (ARTS-1) (Aminopeptidase PILS) (Puromycin-insensitive leucyl-specific aminopeptidase) (PILS-AP) (Type 1 tumor necrosis factor receptor shedding aminopeptidase r [MASS=105846] | 0.00 | 5.27  | 2.12 | 0.00 | 1 | 2 | 2 | EM[147]FDDVSYDKGAC[339]ILNM[147]LR         | 1 |
|                                                                                                                                                                                                                                                                              |      |       |      |      |   |   | 3 | EGELRILASTQFEPTAARM[147]AFPC[339]FDEPAFK   | 1 |
| ARX_HUMAN (Q96QS3) Homeobox protein ARX (Aristaless-related homeobox) [MASS=58160]                                                                                                                                                                                           | 0.00 | 10.14 | 1.15 | 0.00 | 1 | 3 | 2 | EELAMRLDLTEAR                              | 1 |
|                                                                                                                                                                                                                                                                              |      |       |      |      |   |   | 2 | RC[330]PVAATGAVAAAAAAVATEGGELSPK           | 1 |
|                                                                                                                                                                                                                                                                              |      |       |      |      |   |   | 2 | ISQAPQVSISRKSYR                            | 1 |
| ASM_HUMAN (P17405) Sphingomyelin phosphodiesterase precursor (EC 3.1.4.12) (Acid sphingomyelinase) (aSMase) [MASS=69851]                                                                                                                                                     | 0.00 | 5.09  | 0.87 | 0.00 | 1 | 2 | 2 | VHIIHGIPPGH[C330]LKSWSWNYR                 | 1 |
|                                                                                                                                                                                                                                                                              |      |       |      |      |   |   | 2 | ALTTVTALVR                                 | 1 |
| AT12A_HUMAN (P54707) Potassium-transporting ATPase alpha chain 2 (EC 3.6.3.10) (Proton pump) (Non-gastric H(+)/K(+) ATPase subunit alpha) [MASS=115898]                                                                                                                      | 0.00 | 4.41  | *    | *    | * | 3 | 2 | LIIVEGC[339]QR                             | 1 |
|                                                                                                                                                                                                                                                                              |      |       |      |      |   |   | 3 | SAGIKVIM[147]VTGDHPITAKIAK                 | 1 |
|                                                                                                                                                                                                                                                                              |      |       |      |      |   |   | 2 | LIIVEGC[330]QR                             | 1 |
|                                                                                                                                                                                                                                                                              |      |       |      |      |   |   | 2 | FLM[147]VM[147]KGAPERILEK                  | 1 |



|                                                                                                                                                   |                             |      |      |      |    |   |   |                                       |   |
|---------------------------------------------------------------------------------------------------------------------------------------------------|-----------------------------|------|------|------|----|---|---|---------------------------------------|---|
| AT131_HUMAN (Q9HD20) Probable cation-transporting ATPase 13A1 (EC 3.6.3.-) [MASS=132954]                                                          | 0.00                        | 3.82 | 1.61 | 0.00 | 1  | 2 | 3 | C[339]IVDEAMLTGESVPQM[147]KEPIEDLSPDR | 1 |
|                                                                                                                                                   |                             |      |      |      |    |   | 2 | GRC[330]IVDEAMLTGESVPQMK              | 1 |
| AT1A1_HUMAN (P05023) Sodium/potassium-transporting ATPase alpha-1 chain precursor (EC 3.6.3.9) (Sodium pump 1) (Na+/K+ ATPase 1) [MASS=112895]    | 1.00                        | 5.57 | 0.79 | 0.19 | 6  | 5 | 1 | AC[330]VVHGSDLK                       | 1 |
|                                                                                                                                                   |                             |      |      |      |    |   | 2 | NIAFFSTNC[330]VEGTAR                  | 1 |
|                                                                                                                                                   |                             |      |      |      |    |   | 2 | C[339]SSILLHGK                        | 1 |
|                                                                                                                                                   |                             |      |      |      |    |   | 2 | AC[330]VVHGSDLK                       | 1 |
|                                                                                                                                                   |                             |      |      |      |    |   | 2 | C[330]SSILLHGK                        | 1 |
|                                                                                                                                                   |                             |      |      |      |    |   | 2 | C[330]IELC[339]C[330]GSVKEM[147]RER   | 1 |
| AT1A2_HUMAN (P50993) Sodium/potassium-transporting ATPase alpha-2 chain precursor (EC 3.6.3.9) (Sodium pump 2) (Na+/K+ ATPase 2) [MASS=112265]    | 0.00                        | 1.18 | *    | *    | *  | 1 | 3 | EDSPQSHVLVMK                          | 1 |
|                                                                                                                                                   |                             |      |      |      |    |   | 2 | KYNTDC[330]VQGLTHSK                   | 2 |
| AT1A3_HUMAN (P13637) Sodium/potassium-transporting ATPase alpha-3 chain (EC 3.6.3.9) (Sodium pump 3) (Na+/K+ ATPase 3) (Alpha(III)) [MASS=111734] | 1.00                        | 9.28 | 0.54 | 0.42 | 24 | 7 | 3 | SPDC[330]THDNPLETR                    | 1 |
|                                                                                                                                                   |                             |      |      |      |    |   | 2 | VLGFC[330]HYLPEEQFPK                  | 4 |
|                                                                                                                                                   |                             |      |      |      |    |   | 2 | IISAHGC[330]K                         | 3 |
|                                                                                                                                                   |                             |      |      |      |    |   | 2 | M[147]SVEEVC[330]R                    | 1 |
|                                                                                                                                                   |                             |      |      |      |    |   | 2 | SPDC[339]THDNPLETR                    | 2 |
|                                                                                                                                                   |                             |      |      |      |    |   | 1 | SPDC[330]THDNPLETR                    | 1 |
| 2                                                                                                                                                 | VLGFC[339]HYLPEEQFPK        | 1    |      |      |    |   |   |                                       |   |
| 3                                                                                                                                                 | ILDRC[339]STILLQGKEQPLDEEMK | 1    |      |      |    |   |   |                                       |   |
| 1                                                                                                                                                 | IISAHGC[330]K               | 1    |      |      |    |   |   |                                       |   |
| 2                                                                                                                                                 | YNTDC[330]VQGLTHSK          | 1    |      |      |    |   |   |                                       |   |
| 2                                                                                                                                                 | KYNTDC[339]VQGLTHSK         | 2    |      |      |    |   |   |                                       |   |
| 2                                                                                                                                                 | SPDC[330]THDNPLETR          | 5    |      |      |    |   |   |                                       |   |
| AT1A4_HUMAN                                                                                                                                       | 0.00                        | 2.14 | *    | *    | *  | 1 | 2 | VDASAAKIVVHGAELKDIQSK                 | 1 |

|                                                                                                                                                                                                                                                                              |                                          |       |      |      |   |   |   |                                     |   |
|------------------------------------------------------------------------------------------------------------------------------------------------------------------------------------------------------------------------------------------------------------------------------|------------------------------------------|-------|------|------|---|---|---|-------------------------------------|---|
| AT1B1_HUMAN (P05026) Sodium/potassium-transporting ATPase subunit beta-1 (Sodium/potassium-dependent ATPase beta-1 subunit) [MASS=35061]                                                                                                                                     | 1.00                                     | 16.50 | 0.53 | 0.10 | 7 | 4 | 2 | YNPNVLPVQC[330]TGKR                 | 1 |
|                                                                                                                                                                                                                                                                              |                                          |       |      |      |   |   | 2 | EGKPC[330]IIIK                      | 1 |
|                                                                                                                                                                                                                                                                              |                                          |       |      |      |   |   | 2 | YNPNVLPVQC[330]TGK                  | 4 |
|                                                                                                                                                                                                                                                                              |                                          |       |      |      |   |   | 1 | VAPPGLTQIPQIQK                      | 1 |
|                                                                                                                                                                                                                                                                              |                                          |       |      |      |   |   | 2 | YNPNVLPVQC[339]TGK                  | 1 |
| AT1B2_HUMAN (P14415) Sodium/potassium-transporting ATPase subunit beta-2 (Sodium/potassium-dependent ATPase beta-2 subunit) [MASS=33326]                                                                                                                                     | 0.00                                     | 8.28  | 4.06 | 0.00 | 1 | 1 | 3 | SC[339]GQVVEEWKEFVWNPRT HQFM[147]GR | 1 |
| AT2A2_HUMAN (P16615) Sarcoplasmic/endoplasmic reticulum calcium ATPase 2 (EC 3.6.3.8) (Calcium pump 2) (SERCA2) (SR Ca(2+)-ATPase 2) (Calcium-transporting ATPase sarcoplasmic reticulum type, slow twitch skeletal muscle isoform) (Endoplasmic reticulum cla [MASS=114756] | 0.82                                     | 1.25  | 0.90 | 0.00 | 1 | 1 | 2 | SM[147]SVYC[330]TPNKPSR             | 1 |
| AT2A3_HUMAN (Q93084) Sarcoplasmic/endoplasmic reticulum calcium ATPase 3 (EC 3.6.3.8) (Calcium pump 3) (SERCA3) (SR Ca(2+)-ATPase 3) [MASS=113977]                                                                                                                           | *                                        | 1.92  | *    | *    | * | 1 | 3 | AVNQDKKNMLFSGTNITSGK                | 1 |
| AT2B1_HUMAN (P20020) Plasma membrane calcium-transporting ATPase 1 (EC 3.6.3.8) (PMCA1) (Plasma membrane calcium pump isoform 1) (Plasma membrane calcium ATPase isoform 1) [MASS=138754]                                                                                    | 1.00                                     | 5.17  | *    | *    | * | 3 | 3 | HLDAC[330]ETM[147]GNATAIC[330]SDK   | 1 |
|                                                                                                                                                                                                                                                                              |                                          |       |      |      |   |   | 2 | HLDAC[330]ETM[147]GNATAIC[330]SDK   | 1 |
|                                                                                                                                                                                                                                                                              |                                          |       |      |      |   |   | 3 | TGTLTM[147]NRM[147]TVVQAYINEKHYYK   | 1 |
|                                                                                                                                                                                                                                                                              |                                          |       |      |      |   |   | 2 | AKAQDGAAMEM[147]QPLKSEEGGDGDEK      | 1 |
| AT2B2_HUMAN (Q01814) Plasma membrane calcium-transporting ATPase 2 (EC 3.6.3.8) (PMCA2) (Plasma membrane calcium pump isoform 2) (Plasma membrane calcium ATPase isoform 2) [MASS=136875]                                                                                    | 1.00                                     | 11.02 | *    | *    | * | 5 | 2 | QVGNKTEC[330]GLLGFVLDLK             | 1 |
|                                                                                                                                                                                                                                                                              |                                          |       |      |      |   |   | 3 | YGDLLPADGLFIQGNLKDIDESSLTGESDQVR    | 1 |
|                                                                                                                                                                                                                                                                              |                                          |       |      |      |   |   | 2 | IEDSQPHIPLIDDTDLEEDAALK             | 1 |
|                                                                                                                                                                                                                                                                              |                                          |       |      |      |   |   | 3 | GVKKG DGLQLPAADGAAASNAADSANASLVNGK  | 1 |
|                                                                                                                                                                                                                                                                              |                                          |       |      |      |   |   | 2 | QVGNKTEC[339]GLLGFVLDLK             | 1 |
| 3                                                                                                                                                                                                                                                                            | PLISRTM[147]M[147]KNILGHAVYQLALIFTLFVGEK | 1     |      |      |   |   |   |                                     |   |
| AT2B3_HUMAN                                                                                                                                                                                                                                                                  | 1.00                                     | 0.98  | 0.72 | 0.00 | 2 | 1 | 2 | KIIEPMAC[330]DGLR                   | 1 |

|                                                                                                                                                                                                                                                                              |      |       |      |      |   |   |                                                                                                              |                  |
|------------------------------------------------------------------------------------------------------------------------------------------------------------------------------------------------------------------------------------------------------------------------------|------|-------|------|------|---|---|--------------------------------------------------------------------------------------------------------------|------------------|
| AT2C1_HUMAN (P98194) Calcium-transporting ATPase type 2C member 1 (EC 3.6.3.8) (ATPase 2C1) (ATP-dependent Ca(2+) pump PMR1) [MASS=100577]                                                                                                                                   | 0.00 | 6.75  | 1.61 | 0.00 | 1 | 3 | 2 DSILTKNLILKILVSSIIIVC[330]GTLFVFWR<br>2 SNIAFM[147]GTLVRC[330]GKAK<br>3 SLEELSKLVPPEC[339]HC[339]VR        | 1<br>1<br>1      |
| AT5F1_HUMAN (P24539) ATP synthase B chain, mitochondrial precursor (EC 3.6.3.14) [MASS=28908]                                                                                                                                                                                | 0.00 | 2.34  | 1.77 | 0.00 | 2 | 1 | 1 C[339]IADLK                                                                                                | 3                |
| AT8A1_HUMAN (Q9Y2Q0) Probable phospholipid-transporting ATPase IA (EC 3.6.3.1) (Chromaffin granule ATPase II) (ATPase class I type 8A member 1) [MASS=131368]                                                                                                                | *    | 3.61  | *    | *    | * | 2 | 2 NMGMIVINEGSLDGTRETLR<br>2 TSLADQEEVRTIFINQPQLTK                                                            | 1<br>1           |
| ATD3A_HUMAN (Q9NVI7) ATPase family AAA domain-containing protein 3A [MASS=71369]                                                                                                                                                                                             | *    | 12.15 | *    | *    | * | 4 | 3 INEMVHFDLPGQEERER<br>2 ATVEREM[147]ELRHK<br>3 EGV TAMHKLFDWANTSRR<br>3 LALHSGMDYAIMTGGDVAPM[147]GREGVTAMHK | 1<br>1<br>1<br>1 |
| ATD3B_HUMAN (Q5T9A4) ATPase family AAA domain-containing protein 3B [MASS=72572]                                                                                                                                                                                             | *    | 6.94  | *    | *    | * | 2 | 3 IDVM[147]VHFDLPQEEERERLVR<br>3 DGVLTEAMM[147]DAC[330]VQDAVQQYRQKMR                                         | 1<br>1           |
| ATF6B_HUMAN (Q99941) Cyclic AMP-dependent transcription factor ATF-6 beta (Activating transcription factor 6 beta) (ATF6-beta) (cAMP-responsive element-binding protein-like 1) (cAMP response element-binding protein-related protein) (Creb-rp) (Protein G13) [MASS=76709] | 0.00 | 2.84  | 0.52 | 0.00 | 1 | 1 | 2 GAPGDYEEMM[147]QIEC[330]EVM[147]DTR                                                                        | 1                |
| ATF7_HUMAN (P17544) Cyclic AMP-dependent transcription factor ATF-7 (Activating transcription factor 7) (Transcription factor ATF-A) [MASS=52967]                                                                                                                            | *    | 6.48  | *    | *    | * | 1 | 3 MRLKATLTHQVSSINGGC[330]GMVVG TASTM[147]VTAR                                                                | 1                |
| ATG4C_HUMAN (Q96DT6) Cysteine protease ATG4C (EC 3.4.22.-) (Autophagy-related protein 4 homolog C) (Autophagin-3) (Autophagy-related cysteine endopeptidase 3) (AUT-like 3 cysteine endopeptidase) [MASS=52497]                                                              | 0.00 | 5.24  | 0.48 | 0.00 | 1 | 1 | 2 TLPAESGC[330]TIEDHVIAGNVEEFRK                                                                              | 1                |
| ATP5E_HUMAN (P56381) ATP synthase epsilon chain, mitochondrial (EC 3.6.3.14) [MASS=5649]                                                                                                                                                                                     | 0.00 | 14.00 | 1.39 | 0.00 | 1 | 1 | 2 YSQIC[339]AK<br>1 YSQIC[330]AK<br>1 YSQIC[339]AK                                                           | 1<br>1<br>1      |

|                                                                                                                                                                                                                                                                             |      |       |      |      |   |   |   |                                                    |   |
|-----------------------------------------------------------------------------------------------------------------------------------------------------------------------------------------------------------------------------------------------------------------------------|------|-------|------|------|---|---|---|----------------------------------------------------|---|
| ATP8_HUMAN (P03928) ATP synthase protein 8 (EC 3.6.3.14) (ATPase subunit 8) (A6L) [MASS=7992]                                                                                                                                                                               | 1.00 | 16.18 | 1.82 | 0.08 | 5 | 1 | 2 | IC[339]SLHSLPPQS                                   | 4 |
| ATPG_HUMAN (P36542) ATP synthase gamma chain, mitochondrial precursor (EC 3.6.3.14) [MASS=32996]                                                                                                                                                                            | 1.00 | 4.03  | 1.87 | 0.04 | 4 | 1 | 2 | IC[330]SLHSLPPQS                                   | 1 |
|                                                                                                                                                                                                                                                                             |      |       |      |      |   |   | 2 | GLC[339]GAIHSSIAK                                  | 2 |
|                                                                                                                                                                                                                                                                             |      |       |      |      |   |   | 2 | GLC[330]GAIHSSIAK                                  | 2 |
| ATRN_HUMAN (O75882) Attractin precursor (Mahogany homolog) (DPPT-L) [MASS=158536]                                                                                                                                                                                           | 0.00 | 4.62  | 1.06 | 0.00 | 1 | 3 | 3 | DKIYM[147]YGGKIDSTGNVTNELR                         | 1 |
|                                                                                                                                                                                                                                                                             |      |       |      |      |   |   | 2 | MPSQAPTGNFYQPQLLNSSM[147]C[330]LEDSR               | 1 |
|                                                                                                                                                                                                                                                                             |      |       |      |      |   |   | 2 | SVNNVVVRYGHSLALYKDK                                | 1 |
| ATS16_HUMAN (Q8TE57) ADAMTS-16 precursor (EC 3.4.24.-) (A disintegrin and metalloproteinase with thrombospondin motifs 16) (ADAM-TS 16) (ADAM-TS16) [MASS=136187]                                                                                                           | *    | 4.90  | *    | *    | * | 3 | 3 | AQLLPDAVC[330]TSEPKPRM[147]HEAC[339]LLQR           | 1 |
|                                                                                                                                                                                                                                                                             |      |       |      |      |   |   | 3 | C[330]ETKFM[147]PAAEGTIC[330]GHDM[147]WC[339]R     | 1 |
|                                                                                                                                                                                                                                                                             |      |       |      |      |   |   | 3 | PRM[147]HEAC[339]LLQRC[330]HK                      | 1 |
| ATS17_HUMAN (Q8TE56) ADAMTS-17 precursor (EC 3.4.24.-) (A disintegrin and metalloproteinase with thrombospondin motifs 17) (ADAM-TS 17) (ADAM-TS17) [MASS=121099]                                                                                                           | *    | 1.37  | *    | *    | * | 1 | 2 | WVAGPWSPC[339]SATC[330]JEK                         | 1 |
| ATX7_HUMAN (O15265) Ataxin-7 (Spinocerebellar ataxia type 7 protein) [MASS=95451]                                                                                                                                                                                           | *    | 5.16  | *    | *    | * | 3 | 2 | LDC[330]HYSGHHPQPASFC[330]TFGSRQIGR                | 1 |
|                                                                                                                                                                                                                                                                             |      |       |      |      |   |   | 3 | IM[147]TPSVKVEKIHPK                                | 1 |
|                                                                                                                                                                                                                                                                             |      |       |      |      |   |   | 2 | THSLTQR                                            | 1 |
| B3A4_HUMAN (Q96Q91) Anion exchange protein 4 (Anion exchanger 4) (Solute carrier family 4 member 9) (Sodium bicarbonate cotransporter 5) [MASS=108247]                                                                                                                      | *    | 2.44  | *    | *    | * | 2 | 2 | WDPTARIPPPKC[330]LPSQHK                            | 1 |
|                                                                                                                                                                                                                                                                             |      |       |      |      |   |   | 1 | HVPLTR                                             | 1 |
| B4GT7_HUMAN (Q9UBV7) Beta-1,4-galactosyltransferase 7 (EC 2.4.1.-) (Beta-1,4-GalTase 7) (Beta4Gal-T7) (b4Gal-T7) (UDP-galactose:beta-N-acetylglucosamine beta-1,4-galactosyltransferase 7) (UDP-Gal:beta-GlcNAc beta-1,4-galactosyltransferase 7) [Includes: X [MASS=37406] | *    | 9.17  | *    | *    | * | 1 | 3 | TALSVGGAPC[330]TVLNIM[147]LDC[330]DKTATPWC[330]TFS | 1 |

|                                                                                                                                                                                                                    |      |      |      |      |   |   |   |                                                                                                                                                  |                       |
|--------------------------------------------------------------------------------------------------------------------------------------------------------------------------------------------------------------------|------|------|------|------|---|---|---|--------------------------------------------------------------------------------------------------------------------------------------------------|-----------------------|
| BAZ2A_HUMAN (Q9UIF9) Bromodomain adjacent to zinc finger domain 2A (Transcription termination factor I-interacting protein 5) (TTF-I-interacting protein 5) (Tip5) (hWALp3) [MASS=208360]                          | 0.00 | 2.29 | 1.78 | 0.00 | 1 | 2 | 3 | QQM[147]ILEEM[147]KKPTEDM[147]C[330]LTDHQPLPDFSR<br>SEVEM[147]EGPEEC[330]LGRR                                                                    | 1<br>1                |
| BBS10_HUMAN (Q8TAM1) Bardet-Biedl syndrome 10 protein [MASS=80837]                                                                                                                                                 | 0.34 | 4.70 | 0.99 | 0.00 | 1 | 2 | 2 | NRLTDYYEPLLK                                                                                                                                     | 1                     |
| BBS2_HUMAN (Q9BXC9) Bardet-Biedl syndrome 2 protein [MASS=79870]                                                                                                                                                   | *    | 2.22 | *    | *    | * | 1 | 2 | C[339]HQSEETM[147]VSM[147]IIANALLGIPK<br>DAIRSNININTLFKIMR                                                                                       | 1<br>1                |
| BC11B_HUMAN (Q9C0K0) B-cell lymphoma/leukemia 11B (B-cell CLL/lymphoma 11B) (Radiation-induced tumor suppressor gene 1 protein) (hRit1) (COUP-TF-interacting protein 2) [MASS=95519]                               | *    | 9.96 | *    | *    | * | 4 | 3 | QC[339]GGSLGAC[330]YDKALDK<br>VSEPVEIGIQVTPDEDDHLLSPTK<br>ENGGGVPGVPGAGGGAALKALADEK<br>LRELAGNSSTPPPSPGRGNPMHR                                   | 1<br>1<br>1<br>1      |
| BCAR1_HUMAN (P56945) Breast cancer anti-estrogen resistance protein 1 (CRK-associated substrate) (p130cas) [MASS=93361]                                                                                            | 0.00 | 5.52 | 0.86 | 0.00 | 1 | 2 | 2 | GDIMTVLEQDTQGLDGWWLC[330]SLHGR<br>QAKAADVRSQVTHYSNLLC[339]DLLR                                                                                   | 1<br>1                |
| BIRC4_HUMAN (P98170) Baculoviral IAP repeat-containing protein 4 (Inhibitor of apoptosis protein 3) (X-linked inhibitor of apoptosis protein) (X-linked IAP) (IAP-like protein) (HILP) [MASS=56685]                | 0.00 | 3.42 | 0.19 | 0.00 | 1 | 2 | 1 | VSPNC[339]R<br>C[330]PMC[330]YTVITFK                                                                                                             | 1<br>1                |
| BNC2_HUMAN (Q6ZN30) Zinc finger protein basoenuclin-2 [MASS=122329]                                                                                                                                                | *    | 1.27 | *    | *    | * | 1 | 3 | ATSGAATPVIASK                                                                                                                                    | 1                     |
| BPA1_HUMAN (Q03001) Bullous pemphigoid antigen 1 isoforms 1/2/3/4/5/8 (230 kDa bullous pemphigoid antigen) (BPA) (Hemidesmosomal plaque protein) (Dystonia musculorum protein) (Dystonin) (Fragment) [MASS=372207] | *    | 3.70 | *    | *    | * | 5 | 2 | QHVIDVQILIDGKYYQADQLVQR<br>HHVTTMSERTFPNNPVELK<br>LESGVQFQNEAEIAGYILEC[339]ENLLR<br>LKTVNLVLKNTQAAEALVK<br>WKVISPTGNEAMVPSVC[339]FTVPPPKEAVDLANR | 1<br>1<br>1<br>1<br>1 |
| BPAEB_HUMAN (Q8W XK8) Bullous pemphigoid antigen 1, isoform 7 (Bullous pemphigoid antigen) (BPA) (Hemidesmosomal plaque protein) (Dystonia musculorum protein) (Dystonin) (Fragment) [MASS=344987]                 | *    | 1.14 | *    | *    | * | 1 | 3 | ELSKAKEIISAASPTTIPVLDALAQSMITESMAIK                                                                                                              | 1                     |

|                                                                                                                                                                                            |                         |      |      |      |   |   |   |                                              |   |
|--------------------------------------------------------------------------------------------------------------------------------------------------------------------------------------------|-------------------------|------|------|------|---|---|---|----------------------------------------------|---|
| BPIL1_HUMAN (Q8N4F0)<br>Bactericidal/permeability-increasing protein-like<br>1 precursor (Long palate, lung and nasal<br>epithelium carcinoma-associated protein 2)<br>(RYSR) [MASS=49172] | *                       | 2.84 | *    | *    | * | 1 | 2 | QFPEPM[147]PVVLKVR                           | 2 |
| BRAP_HUMAN (Q7Z569) BRCA1-associated<br>protein (EC 6.3.2.-) (BRAP2) (Impedes<br>mitogenic signal propagation) (IMP) (RING<br>finger protein 52) (NY-REN-63 antigen)<br>[MASS=67290]       | *                       | 4.05 | *    | *    | * | 1 | 2 | EM[147]TDVIETM[147]KSNPDELKTTVEER            | 1 |
| BRCA1_HUMAN (P38398) Breast cancer type<br>1 susceptibility protein (RING finger protein 53)<br>[MASS=207720]                                                                              | *                       | 3.33 | *    | *    | * | 3 | 2 | GDVVNGRNHQGPK                                | 1 |
| BRD1_HUMAN (O95696) Bromodomain-<br>containing protein 1 (BR140-like protein)<br>[MASS=119519]                                                                                             | 0.00                    | 8.03 | 2.09 | 0.26 | 3 | 4 | 2 | TPEMINQGTNQTEQNGQVM[147]NITNSGHENK           | 1 |
|                                                                                                                                                                                            |                         |      |      |      |   |   | 3 | C[339]SNTSELKEFVNPSLPREEK                    | 1 |
|                                                                                                                                                                                            |                         |      |      |      |   |   | 3 | ANC[339]YTAHVTC[339]AQKAGLYM[147]KM[147]EPVK | 1 |
|                                                                                                                                                                                            |                         |      |      |      |   |   | 3 | KGDC[339]VPAVSQSMFEFLM[147]DR                | 1 |
|                                                                                                                                                                                            |                         |      |      |      |   |   | 3 | ISIFDPLEIILEDLTAQEMSEC[339]NSNK              | 1 |
| 2                                                                                                                                                                                          | ANC[330]YTAHVTC[330]AQK | 1    |      |      |   |   |   |                                              |   |
| BRSK1_HUMAN (Q8TDC3) BR<br>serine/threonine-protein kinase 1 (EC 2.7.11.1)<br>(SAD1 kinase) (SAD1A) [MASS=86753]                                                                           | 0.00                    | 4.53 | 1.20 | 0.00 | 1 | 2 | 2 | HEPDPC[330]LEPAPGR                           | 1 |
|                                                                                                                                                                                            |                         |      |      |      |   |   | 2 | SLPSNGELDPDVLES MASLGC[339]FR                | 1 |
| BRSK2_HUMAN (Q8IWQ3) BR<br>serine/threonine-protein kinase 2 (EC 2.7.11.1)<br>(Serine/threonine-protein kinase 29) (SAD1B)<br>[MASS=81607]                                                 | *                       | 3.12 | *    | *    | * | 1 | 2 | LSKC[330]GSPLSNFFDVIKQLFSDEK                 | 1 |
| BRWD1_HUMAN (Q9NSI6) Bromodomain and<br>WD repeat domain-containing protein 1 (WD<br>repeat protein 9) [MASS=262918]                                                                       | *                       | 4.01 | *    | *    | * | 4 | 3 | YM[147]VSTGADGTVC[330]FWQWDLES LKFSRPLK      | 1 |
|                                                                                                                                                                                            |                         |      |      |      |   |   | 2 | LKAESISEEADSEPRSGGR                          | 1 |
|                                                                                                                                                                                            |                         |      |      |      |   |   | 3 | SPESSILDGMIRQLQQQQDQR                        | 1 |
|                                                                                                                                                                                            |                         |      |      |      |   |   | 3 | VTMIAWNQNDSIVVTAVNDHVLK                      | 1 |
| BSN_HUMAN (Q9UPA5) Bassoon protein<br>(Zinc-finger protein 231) [MASS=416365]                                                                                                              | 0.00                    | 1.78 | 1.71 | 0.00 | 1 | 4 | 2 | DAC[339]ELESGETPC[339]VVR                    | 1 |
|                                                                                                                                                                                            |                         |      |      |      |   |   | 2 | HGARVEKYGPGPM[147]GPK                        | 1 |
|                                                                                                                                                                                            |                         |      |      |      |   |   | 2 | AAREKPLSASDGEGGTPQPSR                        | 1 |
| 3                                                                                                                                                                                          | PPSAPAGGGQLPAAGAAR      | 1    |      |      |   |   |   |                                              |   |
| BSPRY_HUMAN (Q5W0U4) B box and SPRY<br>domain-containing protein [MASS=44381]                                                                                                              | *                       | 8.46 | *    | *    | * | 2 | 2 | TGLVGMLTHLDDLQLIQEKEIFER                     | 1 |
|                                                                                                                                                                                            |                         |      |      |      |   |   | 1 | AVMASAAR                                     | 1 |

|                                                                                                                                                                                                                                                                              |      |      |      |      |   |   |   |                                     |   |
|------------------------------------------------------------------------------------------------------------------------------------------------------------------------------------------------------------------------------------------------------------------------------|------|------|------|------|---|---|---|-------------------------------------|---|
| C163A_HUMAN (Q86VB7) Scavenger receptor cysteine-rich type 1 protein M130 precursor (CD163 antigen) (Hemoglobin scavenger receptor) [Contains: Soluble CD163 (sCD163)] [MASS=125436]                                                                                         | 0.00 | 5.10 | 0.81 | 0.00 | 1 | 3 | 2 | DVGVVC[330]SRYTEIRLVNGK             | 1 |
|                                                                                                                                                                                                                                                                              |      |      |      |      |   |   | 2 | VC[330]DRGWGLKEADVVC[339]R          | 1 |
|                                                                                                                                                                                                                                                                              |      |      |      |      |   |   | 3 | IWMDHVSC[330]RGNESALWDC[339]KHDGWGK | 1 |
| C1QBP_HUMAN (Q07021) Complement component 1 Q subcomponent-binding protein, mitochondrial precursor (Glycoprotein gC1qBP) (C1qBP) (GC1q-R protein) (Hyaluronan-binding protein 1) (Mitochondrial matrix protein p32) (p33) [MASS=31362]                                      | 1.00 | 9.57 | 1.46 | 0.04 | 4 | 1 | 2 | ALVLDC[339]HYPEDEVGQEDEAESDIFSIR    | 2 |
|                                                                                                                                                                                                                                                                              |      |      |      |      |   |   | 3 | ALVLDC[339]HYPEDEVGQEDEAESDIFSIR    | 2 |
| C2TA_HUMAN (P33076) MHC class II transactivator (CIITA) [MASS=123456]                                                                                                                                                                                                        | *    | 2.12 | *    | *    | * | 1 | 3 | HIGPDEVIGESM[147]EMPAEVGQKSQK       | 1 |
| C560_HUMAN (Q99643) Succinate dehydrogenase cytochrome b560 subunit, mitochondrial precursor (Integral membrane protein CII-3) (QPs1) (QPs-1) (Succinate dehydrogenase complex subunit C) (Succinate-ubiquinone oxidoreductase cytochrome B large subunit) (CY [MASS=18610]) | 1.00 | 7.69 | 1.31 | 0.04 | 4 | 1 | 2 | SLC[330]LGPALIHTAK                  | 2 |
|                                                                                                                                                                                                                                                                              |      |      |      |      |   |   | 2 | SLC[339]LGPALIHTAK                  | 2 |
| C8AP2_HUMAN (Q9UUKL3) CASP8-associated protein 2 (FLICE-associated huge protein) [MASS=222656]                                                                                                                                                                               | *    | 4.14 | *    | *    | * | 5 | 2 | FEPSVIVTPLVESK                      | 1 |
|                                                                                                                                                                                                                                                                              |      |      |      |      |   |   | 1 | KNISALIK                            | 1 |
|                                                                                                                                                                                                                                                                              |      |      |      |      |   |   | 2 | IVPII AVPSSEQEIMHMLRMIRK            | 1 |
|                                                                                                                                                                                                                                                                              |      |      |      |      |   |   | 3 | C[330]PSSLSNSRTHK                   | 6 |
|                                                                                                                                                                                                                                                                              |      |      |      |      |   |   | 3 | AAAPVMDVLQTDVSNFGLLEDTK             | 1 |
| CAC2D_HUMAN (P54289) Dihydropyridine-sensitive L-type calcium channel subunits alpha-2/delta precursor [Contains: L-type calcium channel subunit alpha-2; L-type calcium channel subunit delta] [MASS=123183]                                                                | 0.82 | 4.12 | 1.10 | 0.00 | 1 | 2 | 2 | NQLILGVM[147]GVDVSLEDIK             | 1 |
|                                                                                                                                                                                                                                                                              |      |      |      |      |   |   | 3 | FTLC[330]PNGYYFAIDPNGYVLLHPNLQPK    | 1 |

|                                                                                                                                                                                                                                                                              |      |      |      |      |   |   |        |                                                             |        |
|------------------------------------------------------------------------------------------------------------------------------------------------------------------------------------------------------------------------------------------------------------------------------|------|------|------|------|---|---|--------|-------------------------------------------------------------|--------|
| CACP_HUMAN (P43155) Carnitine O-acetyltransferase (EC 2.3.1.7) (Carnitine acetylase) (CAT) (Carnitine acetyltransferase) (CrAT) [MASS=70925]                                                                                                                                 | *    | 0.80 | *    | *    | * | 1 | 1      | GYTDR                                                       | 1      |
| CAD13_HUMAN (P55290) Cadherin-13 precursor (Truncated-cadherin) (T-cadherin) (T-cad) (Heart-cadherin) (H-cadherin) (P105) [MASS=78286]                                                                                                                                       | *    | 2.52 | *    | *    | * | 1 | 2      | VNSDGGLVALRNITAVGK                                          | 1      |
| CAD23_HUMAN (Q9H251) Cadherin-23 precursor (Otocadherin) [MASS=369522]                                                                                                                                                                                                       | 0.00 | 0.92 | 2.21 | 0.00 | 1 | 2 | 2      | VVASDAGTPTK<br>FDFTSDSAVSIPEDC[339]PVGQR                    | 1<br>1 |
| CALD1_HUMAN (Q05682) Caldesmon (CDM) [MASS=93249]                                                                                                                                                                                                                            | *    | 4.41 | *    | *    | * | 2 | 3<br>2 | AEFLNKSVQKSSGVK<br>MQNDAENETTEKEEKSESR                      | 1<br>1 |
| CALU_HUMAN (O43852) Calumenin precursor (Crocabin) (IEF SSP 9302) [MASS=37107]                                                                                                                                                                                               | *    | 6.03 | *    | *    | * | 1 | 3      | QWKGHDLNEDGLVSWEELYK                                        | 1      |
| CAN11_HUMAN (Q9UMQ6) Calpain-11 (EC 3.4.22.-) (Calcium-activated neutral proteinase 11) (CANP 11) [MASS=80582]                                                                                                                                                               | *    | 3.13 | *    | *    | * | 1 | 3      | SSLM[147]GC[339]SIEVTS DSELESM[147]TDK                      | 1      |
| CAN3_HUMAN (P20807) Calpain-3 (EC 3.4.22.-) (Calpain L3) (Calpain p94) (Calcium-activated neutral proteinase 3) (CANP 3) (Muscle-specific calcium-activated neutral protease 3) (nCL-1) [MASS=94253]                                                                         | *    | 2.80 | *    | *    | * | 1 | 3      | THGFTLESC[339]RSMIALM[147]DTDGSGK                           | 1      |
| CASL_HUMAN (Q14511) Enhancer of filamentation 1 (HEF1) (CRK-associated substrate-related protein) (CAS-L) (CasL) (p105) (Protein NEDD9) (NY-REN-12 antigen) [MASS=92860]                                                                                                     | 0.00 | 5.40 | 1.07 | 0.00 | 1 | 2 | 3<br>2 | LQRLQQALEMGVSSLMALVTTDWRC[330]YGYMER<br>YNC[330]DIPGAAEPVAR | 1<br>1 |
| CASPA_HUMAN (Q92851) Caspase-10 precursor (EC 3.4.22.-) (CASP-10) (ICE-like apoptotic protease 4) (Apoptotic protease Mch-4) (FAS-associated death domain protein interleukin-1B-converting enzyme 2) (FLICE2) [Contains: Caspase-10 subunit p23/17; Caspase-1] [MASS=58950] | *    | 6.53 | *    | *    | * | 2 | 3<br>2 | DAEILSHVFQWLGFTVHIHNNVTK<br>PPMRRWSSVS                      | 1<br>1 |
| CASR_HUMAN (P41180) Extracellular calcium-sensing receptor precursor (CaSR) (Parathyroid Cell calcium-sensing receptor) [MASS=120673]                                                                                                                                        | *    | 2.60 | *    | *    | * | 1 | 3      | M[147]AFYSC[339]C[339]WVLLALTWHTSAYGPDQRAQK                 | 1      |



|                                                                                                                                                                                                                                                                              |      |       |      |      |   |   |   |   |                                                      |        |
|------------------------------------------------------------------------------------------------------------------------------------------------------------------------------------------------------------------------------------------------------------------------------|------|-------|------|------|---|---|---|---|------------------------------------------------------|--------|
| CATD_HUMAN (P07339) Cathepsin D precursor (EC 3.4.23.5) [Contains: Cathepsin D light chain; Cathepsin D heavy chain] [MASS=44552]                                                                                                                                            | *    | 7.52  | *    | *    | * | 2 | 2 | 2 | QPGITFIAAK<br>VERQVFGEATKQPGITFIAAK                  | 1<br>1 |
| CC026_HUMAN (Q9BQ75) Protein C3orf26 [MASS=31812]                                                                                                                                                                                                                            | *    | 12.19 | *    | *    | * | 2 | 2 | 2 | MM[147]DIPEIRKEVFELLEMGVLSLC[339]K<br>LM[147]KDYSSRR | 1<br>1 |
| CCAR1_HUMAN (Q8IX12) Cell division cycle and apoptosis regulator protein 1 (Cell cycle and apoptosis regulatory protein 1) (CARP-1) (Death inducer with SAP domain) [MASS=132820]                                                                                            | *    | 2.61  | *    | *    | * | 1 | 2 | 2 | GKDEAM[147]AIGGHWSPSLDGPDPKDPVSLIK                   | 1      |
| CCD44_HUMAN (Q9BSH4) Coiled-coil domain-containing protein 44 [MASS=32477]                                                                                                                                                                                                   | *    | 8.08  | *    | *    | * | 1 | 2 | 2 | ETEDDEERNVFKFIC[339]DASSLHQVR                        | 1      |
| CCD45_HUMAN (Q96GE4) Coiled-coil domain-containing protein 45 [MASS=95296]                                                                                                                                                                                                   | 0.00 | 1.83  | 5.45 | 0.00 | 1 | 1 | 2 | 2 | YYDDYRVQLC[339]AKM[147]JMR                           | 1      |
| CCND1_HUMAN (P24385) G1/S-specific cyclin-D1 (PRAD1 oncogene) (BCL-1 oncogene) [MASS=33729]                                                                                                                                                                                  | *    | 5.08  | *    | *    | * | 1 | 2 | 2 | C[330]EEEVFPLAM[147]NYLDR                            | 1      |
| CCNH_HUMAN (P51946) Cyclin-H (MO15-associated protein) (p37) (p34) [MASS=37643]                                                                                                                                                                                              | 0.00 | 4.33  | 0.17 | 0.00 | 1 | 1 | 2 | 2 | TC[330]LSQLLDIM[147]KSM[147]R                        | 1      |
| CD2L5_HUMAN (Q14004) Cell division cycle 2-like protein kinase 5 (EC 2.7.11.22) (CDC2-related protein kinase 5) (Cholinesterase-related cell division controller) [MASS=164922]                                                                                              | 0.00 | 0.73  | 8.57 | 0.00 | 1 | 1 | 2 | 2 | QLMEGLDYC[339]HK                                     | 1      |
| CD59_HUMAN (P13987) CD59 glycoprotein precursor (Membrane attack complex inhibition factor) (MACIF) (MAC-inhibitory protein) (MAC-IP) (Protectin) (MEM43 antigen) (Membrane inhibitor of reactive lysis) (MIRL) (20 kDa homologous restriction factor) (HRF-20) [MASS=14177] | 1.00 | 18.75 | 0.57 | 0.02 | 2 | 2 | 2 | 2 | LRENELTYYC[330]C[330]K<br>FEHC[330]NFNDVTTR          | 1<br>1 |
| CD81_HUMAN (P60033) CD81 antigen (26 kDa cell surface protein TAPA-1) (Target of the antiproliferative antibody 1) (Tetraspanin-28) (Tspan-28) [MASS=25809]                                                                                                                  | 0.99 | 6.78  | 0.56 | 0.00 | 1 | 1 | 2 | 2 | NNLC[330]PSGSNIISNLFK                                | 1      |

|                                                                                                                                                                     |      |       |      |      |   |   |   |                                          |   |
|---------------------------------------------------------------------------------------------------------------------------------------------------------------------|------|-------|------|------|---|---|---|------------------------------------------|---|
| CD9_HUMAN (P21926) CD9 antigen (p24) (Leukocyte antigen MIC3) (Motility-related protein) (MRP-1) (Tetraspanin-29) (Tspan-29) [MASS=25285]                           | 1.00 | 27.31 | 0.96 | 0.03 | 4 | 3 | 3 | EVQEFYKDTYNK                             | 1 |
|                                                                                                                                                                     |      |       |      |      |   |   | 3 | AIHYALNC[339]C[339]GLAGGVEQFISDIC[339]PK | 2 |
|                                                                                                                                                                     |      |       |      |      |   |   | 3 | YLLFGFNFIWLAGIAVLAIGLWLR                 | 1 |
|                                                                                                                                                                     |      |       |      |      |   |   | 3 | AIHYALNC[330]C[330]GLAGGVEQFISDIC[330]PK | 2 |
| CDAN1_HUMAN (Q8IWY9) Codanin-1 [MASS=133996]                                                                                                                        | *    | 2.04  | *    | *    | * | 1 | 3 | QFAVLLSLRLLAKFLGFVAFLPYR                 | 1 |
| CDC42_HUMAN (P60953) Cell division control protein 42 homolog precursor (G25K GTP-binding protein) [MASS=21310]                                                     | *    | 8.38  | *    | *    | * | 1 | 2 | MQTIKC[330]VVVGDGAVGK                    | 1 |
| CE152_HUMAN (O94986) Centrosomal protein of 152 kDa (Cep152 protein) [MASS=147344]                                                                                  | *    | 4.16  | *    | *    | * | 2 | 2 | EKQEEIHRIQEIQNEQDYR                      | 1 |
|                                                                                                                                                                     |      |       |      |      |   |   | 3 | DSASQGTGQGDGPAAGHHAQPLALQATEAEADKK       | 1 |
| CEA20_HUMAN (Q6UY09) Carcinoembryonic antigen-related cell adhesion molecule 20 precursor [MASS=64502]                                                              | *    | 1.20  | *    | *    | * | 1 | 1 | LVSTVPK                                  | 1 |
| CENB2_HUMAN (Q15057) Centaurin-beta 2 (Cnt-b2) [MASS=88028]                                                                                                         | 0.00 | 9.38  | 0.73 | 0.00 | 1 | 4 | 2 | SC[339]M[147]LQADSEKLRQAWIK              | 1 |
|                                                                                                                                                                     |      |       |      |      |   |   | 3 | LM[147]C[330]ELGNDVINRVYEANVEKM[147]GIK  | 1 |
|                                                                                                                                                                     |      |       |      |      |   |   | 3 | M[147]KMTVDFEEC[330]LK                   | 2 |
|                                                                                                                                                                     |      |       |      |      |   |   | 3 | LM[147]C[330]ELGNDVINRVYEANVEK           | 1 |
| CEND1_HUMAN (Q8WZ64) Centaurin-delta 1 (Cnt-d1) (Arf-GAP, Rho-GAP, ankyrin repeat and pleckstrin homology domain-containing protein 2) (PARX protein) [MASS=193422] | *    | 3.05  | *    | *    | * | 3 | 3 | NEQDFKSGLGITIIPM[147]NVANVKQVDR          | 1 |
|                                                                                                                                                                     |      |       |      |      |   |   | 3 | IKEEPSKILSGNK                            | 2 |
|                                                                                                                                                                     |      |       |      |      |   |   | 2 | DEELHMDSPVEKR                            | 1 |
| CENPE_HUMAN (Q02224) Centromeric protein E (CENP-E protein) [MASS=312088]                                                                                           | 0.00 | 1.84  | 0.23 | 0.00 | 1 | 2 | 2 | PLNSREESLGETAQVYWK                       | 1 |
|                                                                                                                                                                     |      |       |      |      |   |   | 3 | IC[330]QVNNFFNRIAIMNESTEFEEERSATISK      | 1 |
| CENPF_HUMAN (P49454) CENP-F kinetochore protein (Centromere protein F) (Mitosin) (AH antigen) [MASS=367592]                                                         | *    | 2.34  | *    | *    | * | 5 | 2 | KAVM[147]SGIHPAEDTEGTEFEPEGLPEVVKK       | 1 |
|                                                                                                                                                                     |      |       |      |      |   |   | 3 | ATEQSLDPPIEEEHQLR                        | 1 |
|                                                                                                                                                                     |      |       |      |      |   |   | 2 | LALSPLSLGK                               | 1 |
|                                                                                                                                                                     |      |       |      |      |   |   | 1 | SM[147]EEMK                              | 1 |
|                                                                                                                                                                     |      |       |      |      |   |   | 2 | EDLTNELQKEQER                            | 1 |
| CEP35_HUMAN (Q5VT06) Centrosome-associated protein 350 (Centrosome-associated protein of 350 kDa) [MASS=350928]                                                     | *    | 2.92  | *    | *    | * | 5 | 3 | VAQLSSTEC[339]RTGSSHLISTSSWR             | 1 |
|                                                                                                                                                                     |      |       |      |      |   |   | 2 | VLIGNVQPGILRFKGETSFAK                    | 1 |
|                                                                                                                                                                     |      |       |      |      |   |   | 2 | PEGNNNGTYDGIAYFEC[330]K                  | 1 |
|                                                                                                                                                                     |      |       |      |      |   |   | 2 | GHHDSDEEASPEK                            | 1 |
|                                                                                                                                                                     |      |       |      |      |   |   | 3 | SQKTPTSPLSPSSQK                          | 1 |

|                                                                                                                                                                                                                                                  |      |       |      |      |   |   |   |                                               |   |
|--------------------------------------------------------------------------------------------------------------------------------------------------------------------------------------------------------------------------------------------------|------|-------|------|------|---|---|---|-----------------------------------------------|---|
| CEZ2_HUMAN (Q8TE49) Zinc finger A20 domain-containing protein ? (EC 3.-.-.) (Zinc finger protein Cezanne 2) (OTU domain-containing protein 7) [MASS=100676]                                                                                      | 0.00 | 5.51  | 0.13 | 0.00 | 1 | 3 | 3 | SPPAPARQSVIHVQASGARDEAC[330]APAVGALR          | 1 |
|                                                                                                                                                                                                                                                  |      |       |      |      |   |   | 2 | ENC[330]AFYGR                                 | 1 |
|                                                                                                                                                                                                                                                  |      |       |      |      |   |   | 2 | DEAC[339]APAVGALR                             | 1 |
| CF049_HUMAN (Q2TBC4) Protein C6orf49 [MASS=37551]                                                                                                                                                                                                | 0.00 | 2.33  | 0.45 | 0.00 | 1 | 1 | 2 | LEGHTC[330]EK                                 | 1 |
| CF170_HUMAN (Q96NH3) Protein C6orf170 [MASS=143651]                                                                                                                                                                                              | *    | 5.69  | *    | *    | * | 4 | 2 | M[147]TVRYGKFLSLLK                            | 1 |
|                                                                                                                                                                                                                                                  |      |       |      |      |   |   | 3 | EVPTC[339]VIDIIDRLIILNSEAKIR                  | 1 |
|                                                                                                                                                                                                                                                  |      |       |      |      |   |   | 2 | QTEWIENC[339]QRQFC[330]KMMK                   | 1 |
|                                                                                                                                                                                                                                                  |      |       |      |      |   |   | 2 | ILKFC[339]AQTFLLSPLHMTK                       | 1 |
| CFAB_HUMAN (P00751) Complement factor B precursor (EC 3.4.21.47) (C3/C5 convertase) (Properdin factor B) (Glycine-rich beta glycoprotein) (GBG) (PBF2) [Contains: Complement factor B Ba fragment; Complement factor B Bb fragment] [MASS=85532] | 0.00 | 3.93  | 0.53 | 0.00 | 1 | 1 | 3 | DM[147]ENLEDVFYQM[147]IDESQSLSLC[330]GMVWEHRK | 1 |
| CFTR_HUMAN (P13569) Cystic fibrosis transmembrane conductance regulator (CFTR) (cAMP-dependent chloride channel) (ATP-binding cassette transporter sub-family C member 7) [MASS=168172]                                                          | *    | 3.99  | *    | *    | * | 3 | 3 | M[147]AVTRQFPWAVQTWYDSLGAINK                  | 2 |
|                                                                                                                                                                                                                                                  |      |       |      |      |   |   | 3 | RLSQETGLEISEEINEEDLK                          | 1 |
|                                                                                                                                                                                                                                                  |      |       |      |      |   |   | 2 | ISFC[330]SQFSWIM[147]PGTIK                    | 1 |
| CG028_HUMAN (O95766) Protein C7orf28 [MASS=55866]                                                                                                                                                                                                | 0.00 | 3.11  | 1.83 | 0.00 | 1 | 1 | 2 | QC[339]YSMYKLFNGTFLK                          | 1 |
|                                                                                                                                                                                                                                                  |      |       |      |      |   |   | 2 | C[339]EFQDAYVLLSEK                            | 3 |
| CH60_HUMAN (P10809) 60 kDa heat shock protein, mitochondrial precursor (Hsp60) (60 kDa chaperonin) (CPN60) (Heat shock protein 60) (HSP-60) (Mitochondrial matrix protein P1) (P60 lymphocyte protein) (HuCHA60) [MASS=61054]                    | 1.00 | 19.72 | 1.72 | 0.00 | 3 | 6 | 3 | KISSIQSIVPALEIANAHR                           | 1 |
|                                                                                                                                                                                                                                                  |      |       |      |      |   |   | 3 | MLRLPTVFRQM[147]R                             | 1 |
|                                                                                                                                                                                                                                                  |      |       |      |      |   |   | 3 | TLKIPAMTIAKNAGVEGSLIVEK                       | 2 |
|                                                                                                                                                                                                                                                  |      |       |      |      |   |   | 2 | EEKDPGM[147]GAMGGMGGGMGGGMF                   | 1 |
|                                                                                                                                                                                                                                                  |      |       |      |      |   |   | 3 | KQSKPVTTPEEIAQVATISANGDK                      | 1 |
|                                                                                                                                                                                                                                                  |      |       |      |      |   |   | 2 | C[330]EFQDAYVLLSEK                            | 1 |
| CHCH3_HUMAN (Q9NX63) Coiled-coil-helix-coiled-coil-helix domain-containing protein 3 [MASS=26152]                                                                                                                                                | 0.99 | 12.33 | 1.32 | 0.00 | 1 | 3 | 2 | YESHPVC[339]ADLQAK                            | 1 |
|                                                                                                                                                                                                                                                  |      |       |      |      |   |   | 2 | ILQC[339]YR                                   | 1 |
|                                                                                                                                                                                                                                                  |      |       |      |      |   |   | 2 | AAANEQLTR                                     | 1 |

|                                                                                                                                                                                                                                                                                                   |      |       |      |      |   |   |   |                                    |   |
|---------------------------------------------------------------------------------------------------------------------------------------------------------------------------------------------------------------------------------------------------------------------------------------------------|------|-------|------|------|---|---|---|------------------------------------|---|
| CHCH6_HUMAN (Q9BRQ6) Coiled-coil-helix-coiled-coil-helix domain-containing protein 6 [MASS=26458]                                                                                                                                                                                                 | 1.00 | 31.06 | 1.17 | 0.16 | 3 | 5 | 1 | YEQEHAAIQDK                        | 1 |
|                                                                                                                                                                                                                                                                                                   |      |       |      |      |   |   | 3 | ESTLPRSGSSGGQQPSGM[147]KEGVK       | 2 |
|                                                                                                                                                                                                                                                                                                   |      |       |      |      |   |   | 2 | C[339]VSAAHKG                      | 1 |
|                                                                                                                                                                                                                                                                                                   |      |       |      |      |   |   | 2 | VEPVC[339]SGLQAQILHC[339]YR        | 1 |
|                                                                                                                                                                                                                                                                                                   |      |       |      |      |   |   | 2 | DRPHEVLLC[339]SDLVK                | 1 |
| CHD9_HUMAN (Q3L8U1) Chromodomain-helicase-DNA-binding protein 9 (EC 3.6.1.-) (ATP-dependent helicase CHD9) (CHD-9) (Chromatin-related mesenchymal modulator) (Chromatin remodeling factor (Chromatin remodeling factor CHROM1) (Peroxisomal proliferator-activated receptor A-inter [MASS=326004] | 0.00 | 1.69  | 1.54 | 0.00 | 1 | 2 | 3 | FQAIITTFEM[147]ILGGC[339]GELNAIEWR | 1 |
|                                                                                                                                                                                                                                                                                                   |      |       |      |      |   |   | 2 | LLDSPGAATEYSEPSVPTPPGAGVK          | 1 |
| CHST5_HUMAN (Q9GZS9) Carbohydrate sulfotransferase 5 (EC 2.8.2.-) (N-acetylglucosamine 6-O-sulfotransferase 3) (GlcNAc6ST-3) (Intestinal GlcNAc-6-sulfotransferase) (Intestinal N-acetylglucosamine-6-O-sulfotransferase) (I-GlcNAc6ST) (hIGn6ST) (Galactose/N [MASS=43832]                       | *    | 3.33  | *    | *    | * | 1 | 3 | ALC[339]SPPAC[330]SAFPR            | 1 |
| CI004_HUMAN (Q9P0K9) Protein C9orf4 (Brain protein CG-6) [MASS=37270]                                                                                                                                                                                                                             | *    | 4.07  | *    | *    | * | 1 | 2 | AGGLGGGSVPARAR                     | 1 |
|                                                                                                                                                                                                                                                                                                   |      |       |      |      |   |   | 3 | MGNLVIPLGKGRAGR                    | 3 |
| CI079_HUMAN (Q6ZUB1) Protein C9orf79 [MASS=157135]                                                                                                                                                                                                                                                | *    | 1.80  | *    | *    | * | 2 |   |                                    |   |
|                                                                                                                                                                                                                                                                                                   |      |       |      |      |   |   | 2 | TVLESGKPKPR                        | 1 |
| CI114_HUMAN (Q5T280) Protein C9orf114 [MASS=41996]                                                                                                                                                                                                                                                | 0.00 | 3.99  | 1.14 | 0.00 | 1 | 1 | 2 | LNQQQHPDC[339]KTYHGK               | 1 |
| CI121_HUMAN (Q5VZ03) Thioredoxin domain-containing protein C9orf121 [MASS=17614]                                                                                                                                                                                                                  | 0.00 | 9.62  | 1.09 | 0.00 | 1 | 1 | 2 | VVALYFAAARC[339]APSR               | 1 |
| CIC_HUMAN (Q96RK0) Protein capicua homolog [MASS=163789]                                                                                                                                                                                                                                          | *    | 1.24  | *    | *    | * | 2 | 3 | RPMNAFMIFSKR                       | 1 |
|                                                                                                                                                                                                                                                                                                   |      |       |      |      |   |   | 2 | FAELPEFR                           | 1 |
| CISY_HUMAN (O75390) Citrate synthase, mitochondrial precursor (EC 2.3.3.1) [MASS=51712]                                                                                                                                                                                                           | 1.00 | 8.37  | 1.46 | 0.06 | 2 | 4 | 1 | LPC[339]VAAK                       | 1 |
|                                                                                                                                                                                                                                                                                                   |      |       |      |      |   |   | 2 | PKSM[147]STEGLM[147]KFVDSK         | 1 |
|                                                                                                                                                                                                                                                                                                   |      |       |      |      |   |   | 2 | YTC[339]QR                         | 1 |
|                                                                                                                                                                                                                                                                                                   |      |       |      |      |   |   | 3 | PKSMSTEGLM[147]K                   | 1 |

|                                                                                                                                                                                                    |      |       |      |      |    |   |  |   |                              |   |
|----------------------------------------------------------------------------------------------------------------------------------------------------------------------------------------------------|------|-------|------|------|----|---|--|---|------------------------------|---|
|                                                                                                                                                                                                    |      |       |      |      |    |   |  | 2 | IVHAFDM[147]EDLGDKAVYC[339]R | 3 |
|                                                                                                                                                                                                    |      |       |      |      |    |   |  | 2 | IVHAFDM[147]EDLGDKAVYC[330]R | 2 |
|                                                                                                                                                                                                    |      |       |      |      |    |   |  | 2 | KFPFC[330]DGAHTK             | 3 |
| CJ070_HUMAN (Q9NZ45) Protein C10orf70 [MASS=12199]                                                                                                                                                 | 1.00 | 36.11 | 1.63 | 0.04 | 18 | 3 |  | 2 | FPFC[339]DGAHTK              | 4 |
|                                                                                                                                                                                                    |      |       |      |      |    |   |  | 2 | KFPFC[339]DGAHTK             | 4 |
|                                                                                                                                                                                                    |      |       |      |      |    |   |  | 1 | FPFC[339]DGAHTK              | 1 |
|                                                                                                                                                                                                    |      |       |      |      |    |   |  | 3 | IVHAFDM[147]EDLGDKAVYC[339]R | 2 |
| CK5P2_HUMAN (Q96SN8) CDK5 regulatory subunit-associated protein 2 (CDK5 activator-binding protein C48) (Centrosome-associated protein 215) [MASS=215036]                                           | *    | 0.48  | *    | *    | *  | 1 |  | 2 | KARGNLELR                    | 1 |
| CLAT_HUMAN (P28329) Choline O-acetyltransferase (EC 2.3.1.6) (CHOACTase) (Choline acetylase) (ChAT) [MASS=82567]                                                                                   | 0.00 | 2.01  | 1.24 | 0.00 | 1  | 1 |  | 2 | C[330]SPEIQGHLASSAEK         | 1 |
| CLC4C_HUMAN (Q8WTT0) C-type lectin domain family 4 member C (C-type lectin superfamily member 7) (Blood dendritic cell antigen 2 protein) (BDCA-2) (Dendritic lectin) (CD303 antigen) [MASS=25037] | 0.00 | 7.04  | 1.08 | 0.00 | 1  | 1 |  | 2 | NC[339]SVMGADLVVINTR         | 2 |
| CLH1_HUMAN (Q00610) Clathrin heavy chain 1 (CLH-17) [MASS=191482]                                                                                                                                  | 0.99 | 3.41  | 0.53 | 0.08 | 2  | 3 |  | 2 | IHEGC[330]EEPATHNALAK        | 2 |
|                                                                                                                                                                                                    |      |       |      |      |    |   |  | 2 | VLRAAEQAHLWAEFLVFLYDK        | 1 |
|                                                                                                                                                                                                    |      |       |      |      |    |   |  | 2 | C[330]NEPAVWSQLAKAQLQKGMVK   | 1 |
| CLK2_HUMAN (P49760) Dual specificity protein kinase CLK2 (EC 2.7.12.1) (CDC-like kinase 2) [MASS=60090]                                                                                            | 0.00 | 6.01  | 0.84 | 0.00 | 1  | 2 |  | 2 | EHLAMMERILGPIPSRM[147]IR     | 1 |
|                                                                                                                                                                                                    |      |       |      |      |    |   |  | 2 | HM[147]AFQLC[330]QAVK        | 1 |

|                                                                                                                                                                           |                                |       |      |      |    |   |                                                                                                                |                                         |      |
|---------------------------------------------------------------------------------------------------------------------------------------------------------------------------|--------------------------------|-------|------|------|----|---|----------------------------------------------------------------------------------------------------------------|-----------------------------------------|------|
| CMC1_HUMAN (O75746) Calcium-binding mitochondrial carrier protein Aralar1 (Mitochondrial aspartate glutamate carrier 1) (Solute carrier family 25 member 12) [MASS=74755] | 1.00                           | 2.36  | 1.15 | 0.03 | 2  | 1 | 2                                                                                                              | DIPFSAIYFPVYAHC[339]K                   | 1    |
|                                                                                                                                                                           |                                |       |      |      |    |   | 2                                                                                                              | DIPFSAIYFPVYAHC[330]K                   | 1    |
| CN159_HUMAN (Q7Z3D6) Protein C14orf159, mitochondrial precursor [MASS=66436]                                                                                              | 0.98                           | 16.40 | 1.39 | 0.00 | 1  | 4 | 3                                                                                                              | APPGC[339]LTPERIVEVHHISQDPLHYSIASVSASQK | 1    |
|                                                                                                                                                                           |                                |       |      |      |    |   | 3                                                                                                              | IPGISSTGVGDGGNELGMGK                    | 1    |
|                                                                                                                                                                           |                                |       |      |      |    |   | 3                                                                                                              | IRELESM[147]IGIDPGNRGIGHLLC[339]K       | 1    |
|                                                                                                                                                                           |                                |       |      |      |    |   | 3                                                                                                              | AC[339]C[339]SLGGEQGQPVHM[147]GDPELLGIK | 1    |
|                                                                                                                                                                           |                                |       |      |      |    |   | 2                                                                                                              | RPPGVLHC[339]TTK                        | 2    |
|                                                                                                                                                                           |                                |       |      |      |    |   | 3                                                                                                              | AHITLGC[339]AADVEAVQTGLDLEILR           | 1    |
|                                                                                                                                                                           |                                |       |      |      |    |   | 1                                                                                                              | RPPGVLHC[330]TTK                        | 1    |
|                                                                                                                                                                           |                                |       |      |      |    |   | 3                                                                                                              | DKPELQFPFLQDEDTVATLLEC[330]K            | 1    |
|                                                                                                                                                                           |                                |       |      |      |    |   | 3                                                                                                              | DKPELQFPFLQDEDTVATLLEC[339]K            | 2    |
|                                                                                                                                                                           |                                |       |      |      |    |   | 2                                                                                                              | FC[330]DYGKAPGAE EYAQQDVLK              | 1    |
| CN37_HUMAN (P09543) 2',3'-cyclic-nucleotide 3'-phosphodiesterase (EC 3.1.4.37) (CNP) (CNPase) [MASS=47578]                                                                | 1.00                           | 24.47 | 0.92 | 0.11 | 16 | 7 | 2                                                                                                              | RLDEDLAAYC[330]R                        | 1    |
|                                                                                                                                                                           |                                |       |      |      |    |   | 1                                                                                                              | FC[330]DYGK                             | 1    |
|                                                                                                                                                                           |                                |       |      |      |    |   | 2                                                                                                              | LDC[330]AQLK                            | 1    |
|                                                                                                                                                                           |                                |       |      |      |    |   | 2                                                                                                              | RLDEDLAAYC[339]R                        | 1    |
|                                                                                                                                                                           |                                |       |      |      |    |   | 2                                                                                                              | RPPGVLHC[330]TTK                        | 1    |
|                                                                                                                                                                           |                                |       |      |      |    |   | 2                                                                                                              | DKPELQFPFLQDEDTVATLLEC[330]K            | 2    |
|                                                                                                                                                                           |                                |       |      |      |    |   | 2                                                                                                              | AHITLGC[339]AADVEAVQTGLDLEILR           | 1    |
|                                                                                                                                                                           |                                |       |      |      |    |   | 1                                                                                                              | FC[339]DYGK                             | 1    |
|                                                                                                                                                                           |                                |       |      |      |    |   | 2                                                                                                              | KDLNEILVHYPESQK                         | 1    |
|                                                                                                                                                                           |                                |       |      |      |    |   | CNTN1_HUMAN (Q12860) Contactin-1 precursor (Neural cell surface protein F3) (Glycoprotein gp135) [MASS=113320] | 0.99                                    | 2.65 |
| 2                                                                                                                                                                         | GM[147]VLLC[330]DPPYHFPDDL SYR | 1     |      |      |    |   |                                                                                                                |                                         |      |
| CNTP1_HUMAN (P78357) Contactin-associated protein 1 precursor (Caspr) (Caspr1) (Neurexin 4) (Neurexin IV) (p190) [MASS=156266]                                            | 0.31                           | 5.42  | 0.90 | 0.00 | 1  | 5 | 3                                                                                                              | LNLDTEMFIGGLVGAARKNLAYR                 | 1    |
|                                                                                                                                                                           |                                |       |      |      |    |   | 1                                                                                                              | ITFEGK                                  | 1    |
|                                                                                                                                                                           |                                |       |      |      |    |   | 1                                                                                                              | FPRGVSR                                 | 1    |
|                                                                                                                                                                           |                                |       |      |      |    |   | 2                                                                                                              | VQGELSESNC[339]GAM[147]PR               | 1    |
|                                                                                                                                                                           |                                |       |      |      |    |   | 2                                                                                                              | AVATQGSFN SWD WVTRYMLLYGDR              | 1    |
| CNGB1_HUMAN (Q14028) Cyclic nucleotide-gated cation channel 4 (CNG channel 4) (CNG-4) (CNG4) (Cyclic nucleotide-gated cation channel modulatory subunit) [MASS=102284]    | 0.00                           | 1.65  | *    | *    | *  | 1 | 2                                                                                                              | KDLNEILVHYPESQK                         | 1    |

|                                                                                                                                                          |      |       |      |      |   |   |   |                                                   |   |
|----------------------------------------------------------------------------------------------------------------------------------------------------------|------|-------|------|------|---|---|---|---------------------------------------------------|---|
| CNTP2_HUMAN (Q9UHC6) Contactin-associated protein-like 2 precursor (Cell recognition molecule Caspr2) [MASS=148166]                                      | 0.00 | 12.40 | 1.09 | 0.00 | 1 | 6 | 3 | C[330]TC[330]DETGYSGATC[330]HNSIYEPSC[330]EAYK    | 1 |
|                                                                                                                                                          |      |       |      |      |   |   | 3 | VTSGFISGC[339]SGHC[330]TSYGTNC[330]ENGGKC[330]LER | 1 |
|                                                                                                                                                          |      |       |      |      |   |   | 3 | M[147]QAAPRAGC[330]GAALLLWIVSSC[339]LC[339]R      | 1 |
|                                                                                                                                                          |      |       |      |      |   |   | 2 | APC[339]ILLYISSFTTDFLAVLVKPTGSLQIR                | 1 |
|                                                                                                                                                          |      |       |      |      |   |   | 3 | GTYHTNEAKGAESAESAADAAIMNNDPNFTETIDESKK            | 1 |
|                                                                                                                                                          |      |       |      |      |   |   | 3 | YHGYSY[339]DC[339]SNTAYDGTFC[330]NK               | 1 |
| CO039_HUMAN (Q6ZRI6) Uncharacterized protein C15orf39 [MASS=110788]                                                                                      | 0.00 | 2.01  | 1.12 | 0.00 | 1 | 1 | 2 | SSRPDQPSPC[339]PQLLDSQSHHL                        | 1 |
| CO2A1_HUMAN (P02458) Collagen alpha-1(II) chain precursor [Contains: Chondrocalcin] [MASS=134491]                                                        | *    | 5.08  | *    | *    | * | 2 | 3 | GRTGPAGAAGARGNDGQPGPAGPPGVPAGGPGFPGAPGAK          | 1 |
|                                                                                                                                                          |      |       |      |      |   |   | 3 | PGPPGPGQARGQPGVMGFPGPKGANGEPGK                    | 1 |
| CO4A4_HUMAN (P53420) Collagen alpha-4(IV) chain precursor [MASS=164095]                                                                                  | *    | 4.85  | *    | *    | * | 3 | 2 | GHPGPPGVLVTPPLPLKGGPDGPFGR                        | 1 |
|                                                                                                                                                          |      |       |      |      |   |   | 2 | GIPGMVGLPGPPGRKGESGIGAK                           | 1 |
|                                                                                                                                                          |      |       |      |      |   |   | 3 | IPGLPGAPGMRGPEGAMGLPGM[147]RGPPGPGC[330]K         | 1 |
| CO6A1_HUMAN (P12109) Collagen alpha-1(VI) chain precursor [MASS=108547]                                                                                  | *    | 1.56  | *    | *    | * | 1 | 2 | M[147]PGRDALKSSVDAVK                              | 1 |
| COA2_HUMAN (O00763) Acetyl-CoA carboxylase 2 (EC 6.4.1.2) (ACC-beta) [Includes: Biotin carboxylase (EC 6.3.4.14)] [MASS=279692]                          | *    | 1.69  | *    | *    | * | 2 | 2 | TFVQSKKNILVDYGLR                                  | 1 |
|                                                                                                                                                          |      |       |      |      |   |   | 2 | IGSFGPGEDLLYLRASEM[147]ARAEAIK                    | 1 |
| COAC_HUMAN (Q96CD2) Phosphopantothencysteine decarboxylase (EC 4.1.1.36) (PPC-DC) (CoaC) [MASS=22413]                                                    | *    | 7.84  | *    | *    | * | 1 | 2 | MEPKASC[339]PAAAPLMER                             | 1 |
| COF1_HUMAN (P23528) Cofilin-1 (Cofilin, non-muscle isoform) (18 kDa phosphoprotein) (p18) [MASS=18371]                                                   | 0.74 | 8.48  | 0.61 | 0.07 | 2 | 2 | 1 | C[330]TLAEK                                       | 1 |
|                                                                                                                                                          |      |       |      |      |   |   | 2 | M[147]LPDKDC[330]R                                | 2 |
| COG3_HUMAN (Q96JB2) Conserved oligomeric Golgi complex component 3 (Vesicle docking protein SEC34 homolog) (p94) [MASS=93964]                            | *    | 6.41  | *    | *    | * | 2 | 3 | SGSTESLNPRPQTTISPADLHGM[147]WYPTVRR               | 1 |
|                                                                                                                                                          |      |       |      |      |   |   | 3 | PAPGDLAYPDKLVMMEQIAQSLK                           | 1 |
| COPB_HUMAN (P53618) Coatomer subunit beta (Beta-coat protein) (Beta-COP) [MASS=107139]                                                                   | *    | 6.61  | *    | *    | * | 3 | 2 | EDQFQLSLLAAM[147]GNTQRK                           | 1 |
|                                                                                                                                                          |      |       |      |      |   |   | 3 | LVTEM[147]GTYATQSALSSSRPTK                        | 1 |
|                                                                                                                                                          |      |       |      |      |   |   | 3 | ISLC[339]LKVLSLSEC[330]SPLM[147]NDIFNKEC[339]R    | 1 |
| COQ7_HUMAN (Q99807) Ubiquinone biosynthesis protein COQ7 homolog (Coenzyme Q biosynthesis protein 7 homolog) (Timing protein clk-1 homolog) [MASS=24307] | 0.00 | 12.44 | 0.88 | 0.00 | 1 | 2 | 2 | TLMEEDPEKYEELLQLIKK                               | 1 |
|                                                                                                                                                          |      |       |      |      |   |   | 2 | SIIQAGC[339]R                                     | 1 |

|                                                                                                                                                                                                                                                                             |      |       |      |      |   |   |                       |                                                                                                      |                       |
|-----------------------------------------------------------------------------------------------------------------------------------------------------------------------------------------------------------------------------------------------------------------------------|------|-------|------|------|---|---|-----------------------|------------------------------------------------------------------------------------------------------|-----------------------|
| COX5B_HUMAN (P10606) Cytochrome c oxidase polypeptide Vb, mitochondrial precursor (EC 1.9.3.1) [MASS=13696]                                                                                                                                                                 | 0.48 | 40.31 | 1.46 | 0.09 | 3 | 3 | 3<br>2<br>1<br>3<br>1 | GLDPYNVLAPKGASGTR<br>C[339]GAHYK<br>C[330]GAHYK<br>GPSGAAAM[147]RSMASGGGVPTDEEQATGLER<br>C[339]GAHYK | 1<br>1<br>1<br>1<br>4 |
| CP045_HUMAN (Q96MC5) Uncharacterized protein C16orf45 [MASS=23732]                                                                                                                                                                                                          | *    | 5.88  | *    | *    | * | 1 | 2                     | QELQNLVAIPEK                                                                                         | 1                     |
| CP135_HUMAN (Q66GS9) Centrosomal protein of 135 kDa (Cep135 protein) (Centrosomal protein 4) [MASS=133503]                                                                                                                                                                  | *    | 3.33  | *    | *    | * | 2 | 3<br>3                | KESTQTTAPHNIVSLMEK<br>KESTQTTAPHNIVSLMEKEK                                                           | 1<br>1                |
| CP26A_HUMAN (O43174) Cytochrome P450 26A1 (EC 1.14.-.-) (Retinoic acid-metabolizing cytochrome) (P450 retinoic acid-inactivating 1) (P450RAI) (hP450RAI) (Retinoic acid 4-hydroxylase) [MASS=56162]                                                                         | 0.00 | 2.21  | 2.47 | 0.00 | 1 | 1 | 3                     | EELKSKGLLC[339]K                                                                                     | 1                     |
| CP27B_HUMAN (O15528) 25-hydroxyvitamin D-1 alpha hydroxylase, mitochondrial precursor (EC 1.14.13.13) (Cytochrome P450 subfamily XXVIIb polypeptide 1) (Cytochrome p450 27B1) (Calcidiol 1-monooxygenase) (25-OHD-1 alpha-hydroxylase) (25-hydroxyvitamin D(3) [MASS=56504] | *    | 3.94  | *    | *    | * | 1 | 2                     | VRWAPELGASLGYREYHSAR                                                                                 | 1                     |
| CP2A7_HUMAN (P20853) Cytochrome P450 2A7 (EC 1.14.14.1) (CYPIIA7) (P450-IIA4) [MASS=56408]                                                                                                                                                                                  | *    | 5.06  | *    | *    | * | 1 | 3                     | RYC[339]FGEGLARM[147]ELFLFFTTVMQNFR                                                                  | 1                     |
| CP2B6_HUMAN (P20813) Cytochrome P450 2B6 (EC 1.14.14.1) (CYPIIB6) (P450 IIB1) [MASS=56278]                                                                                                                                                                                  | *    | 2.44  | *    | *    | * | 1 | 3                     | PVVMLC[330]GVEAIR                                                                                    | 1                     |
| CQ10B_HUMAN (Q9H8M1) Protein COQ10 B, mitochondrial precursor [MASS=27070]                                                                                                                                                                                                  | *    | 12.61 | *    | *    | * | 1 | 3                     | TC[339]TLDFSISFEFRSLLHSQLATLFFDEVVK                                                                  | 1                     |
| CR2_HUMAN (P20023) Complement receptor type 2 precursor (Cr2) (Complement C3d receptor) (Epstein-Barr virus receptor) (EBV receptor) (CD21 antigen) [MASS=112973]                                                                                                           | *    | 1.55  | *    | *    | * | 1 | 2                     | C[330]NAQGTWEPSAPVC[339]EK                                                                           | 1                     |



|                                                                                                                                                                                                        |      |       |      |      |   |   |   |                                                        |   |
|--------------------------------------------------------------------------------------------------------------------------------------------------------------------------------------------------------|------|-------|------|------|---|---|---|--------------------------------------------------------|---|
| CRTC_HUMAN (P27797) Calreticulin precursor (CRP55) (Calregulin) (HACBP) (ERp60) (grp60) [MASS=48141]                                                                                                   | 1.00 | 6.47  | 1.36 | 0.00 | 2 | 2 | 3 | FVLSSGKFGDEEK                                          | 1 |
|                                                                                                                                                                                                        |      |       |      |      |   |   | 2 | HEQNIDC[339]GGGYVK                                     | 1 |
|                                                                                                                                                                                                        |      |       |      |      |   |   | 2 | HEQNIDC[330]GGGYVK                                     | 1 |
| CRYM_HUMAN (Q14894) Mu-crystallin homolog (NADP-regulated thyroid-hormone-binding protein) [MASS=33775]                                                                                                | 0.24 | 2.87  | 0.86 | 0.00 | 1 | 1 | 2 | GVKPAHC[330]JEK                                        | 1 |
| CSMD3_HUMAN (Q7Z407) CUB and sushi domain-containing protein 3 precursor (CUB and sushi multiple domains protein 3) [MASS=401695]                                                                      | 0.00 | 3.02  | 2.02 | 0.00 | 1 | 5 | 2 | DVLRFEFC[339]QFGFELIGEK                                | 1 |
|                                                                                                                                                                                                        |      |       |      |      |   |   | 3 | IYDGKDKTTHLLGAFTGASM[147]R                             | 1 |
|                                                                                                                                                                                                        |      |       |      |      |   |   | 3 | SGFAIQFSSSVATAC[330]RDPGVPM[147]NGTRNGDGR              | 1 |
|                                                                                                                                                                                                        |      |       |      |      |   |   | 2 | TFHLAQGDVVK                                            | 1 |
|                                                                                                                                                                                                        |      |       |      |      |   |   | 3 | KM[147]KEENWAMDGFVSAEPDGATYVFQGFIQGK                   | 1 |
| CSPG2_HUMAN (P13611) Versican core protein precursor (Large fibroblast proteoglycan) (Chondroitin sulfate proteoglycan core protein 2) (PG-M) (Glial hyaluronate-binding protein) (GHAP) [MASS=372817] | 1.00 | 2.39  | 0.48 | 0.20 | 4 | 4 | 3 | SPQETYDVYC[330]YVDHLDGDVHFLTVPK                        | 1 |
|                                                                                                                                                                                                        |      |       |      |      |   |   | 3 | SILWM[147]C[330]STLIVTHALHK                            | 1 |
|                                                                                                                                                                                                        |      |       |      |      |   |   | 2 | FTFEEAAKEC[330]ENQDAR                                  | 3 |
|                                                                                                                                                                                                        |      |       |      |      |   |   | 2 | ETTVLVAQNGNIKIGQDYKGR                                  | 1 |
| CSPG3_HUMAN (O14594) Neurocan core protein precursor (Chondroitin sulfate proteoglycan 3) [MASS=142972]                                                                                                | *    | 1.67  | *    | *    | * | 2 | 1 | GLHMQK                                                 | 1 |
|                                                                                                                                                                                                        |      |       |      |      |   |   | 2 | GWHKFQGHG[339]YRYFAHR                                  | 1 |
| CT032_HUMAN (Q9NQ75) HEF-like protein [MASS=87144]                                                                                                                                                     | *    | 6.74  | *    | *    | * | 2 | 2 | KAGLHPPDSQASGQGVPLISVTTLRR                             | 1 |
|                                                                                                                                                                                                        |      |       |      |      |   |   | 3 | PC[339]PPFLRGLLEEAPASSEETYQVPTLPR                      | 3 |
| CT2NL_HUMAN (Q9P2B4) CTTNBP2 N-terminal-like protein [MASS=70158]                                                                                                                                      | *    | 8.14  | *    | *    | * | 3 | 3 | M[147]NLEKLSKPELLTLFSILEGELEAR                         | 1 |
|                                                                                                                                                                                                        |      |       |      |      |   |   | 2 | GNPPPIPPKK                                             | 1 |
|                                                                                                                                                                                                        |      |       |      |      |   |   | 2 | NDGEKQPVC[330]TNPLSILK                                 | 1 |
| CTL2_HUMAN (Q8IWA5) Choline transporter-like protein 2 (Solute carrier family 44 member 2) [MASS=80151]                                                                                                | 0.00 | 10.34 | 0.80 | 0.00 | 1 | 4 | 2 | DGDC[339]PAVLIPSKPLAR                                  | 1 |
|                                                                                                                                                                                                        |      |       |      |      |   |   | 3 | TC[339]NPETFPSSNESRQC[339]PNAR                         | 1 |
|                                                                                                                                                                                                        |      |       |      |      |   |   | 2 | QFC[330]VPGFKNNKGVAEVLK                                | 1 |
|                                                                                                                                                                                                        |      |       |      |      |   |   | 2 | KPDDLPAFPLFSAFGRALR                                    | 1 |
| CTNB1_HUMAN (P35222) Beta-catenin [MASS=85496]                                                                                                                                                         | 1.00 | 5.12  | 0.64 | 0.00 | 2 | 3 | 2 | NEGVATYAAAVLFR                                         | 1 |
|                                                                                                                                                                                                        |      |       |      |      |   |   | 2 | NLALC[330]PANHAPLR                                     | 1 |
|                                                                                                                                                                                                        |      |       |      |      |   |   | 2 | C[330]TAGTLHNLSSHRR                                    | 1 |
| CTRB1_HUMAN (P17538) Chymotrypsinogen B precursor (EC 3.4.21.1) [Contains: Chymotrypsin B chain A; Chymotrypsin B chain B; Chymotrypsin B chain C] [MASS=27870]                                        | 0.00 | 11.03 | 0.63 | 0.00 | 1 | 1 | 3 | RITDVM[147]IC[339]AGASGVSSC[339]M[147]GDSGGPLVC[339]QK | 1 |

|                                                                                                                                                     |      |       |      |      |   |   |   |                               |   |
|-----------------------------------------------------------------------------------------------------------------------------------------------------|------|-------|------|------|---|---|---|-------------------------------|---|
| CTRO_HUMAN (O14578) Citron Rho-interacting kinase (EC 2.7.11.1) (CRIK) (Rho-interacting, serine/threonine-protein kinase 21) [MASS=231430]          | *    | 5.33  | *    | *    | * | 6 | 2 | MNSPGLQTKEPSSSLHLEGWM[147]K   | 1 |
|                                                                                                                                                     |      |       |      |      |   |   | 2 | KLVEAEELEEKHR                 | 2 |
|                                                                                                                                                     |      |       |      |      |   |   | 2 | KHAM[147]LEM[147]NARSLQQK     | 1 |
|                                                                                                                                                     |      |       |      |      |   |   | 2 | IVELSEANKLAANSSLFTQRNMK       | 1 |
|                                                                                                                                                     |      |       |      |      |   |   | 3 | KLQEIKEQEYQAQVEEMR            | 1 |
|                                                                                                                                                     |      |       |      |      |   |   | 3 | ETLENMM[147]QRHEEEAHEK        | 1 |
| CU005_HUMAN (Q9Y3R5) Protein C21orf5 [MASS=258222]                                                                                                  | *    | 3.31  | *    | *    | * | 5 | 1 | LSLVVGK                       | 2 |
|                                                                                                                                                     |      |       |      |      |   |   | 3 | PFRVLISLLDKPEIGPQVVGNIFFLEVIR | 1 |
|                                                                                                                                                     |      |       |      |      |   |   | 2 | NVEFIHSLLRQC[330]K            | 1 |
|                                                                                                                                                     |      |       |      |      |   |   | 2 | LQMVTVPPIAPGILK               | 1 |
| CU063_HUMAN (P58658) Protein C21orf63 precursor (SUE21) [MASS=49483]                                                                                | *    | 4.31  | *    | *    | * | 1 | 2 | VFGPDLC[330]PGSSKYLLVSFK      | 1 |
|                                                                                                                                                     |      |       |      |      |   |   | 2 | QIFHSKESIVATTKSK              | 1 |
| CV106_HUMAN (Q6P0N0) Protein C14orf106 (P243) [MASS=129085]                                                                                         | *    | 4.68  | *    | *    | * | 3 | 2 | YMAINQKKAYILVTPLK             | 1 |
|                                                                                                                                                     |      |       |      |      |   |   | 3 | GMIDQISM[147]KEAGYPNYLIRK     | 1 |
|                                                                                                                                                     |      |       |      |      |   |   | 2 | NC[339]WQNYLDFHR              | 1 |
| CX6B1_HUMAN (P14854) Cytochrome c oxidase subunit VIb isoform 1 (EC 1.9.3.1) (COX VIb-1) [MASS=10061]                                               | 0.99 | 12.94 | 1.59 | 0.00 | 1 | 1 | 2 | HGGEDYVFSLLTGYC[339]EPPTGVSLR | 3 |
|                                                                                                                                                     |      |       |      |      |   |   | 2 | HLVGVC[339]YTEDEAK            | 1 |
| CY1_HUMAN (P08574) Cytochrome c1, heme protein, mitochondrial precursor (Cytochrome c-1) [MASS=35390]                                               | 1.00 | 20.92 | 2.16 | 0.05 | 5 | 4 | 3 | GLLC[330]SARPGQLPLR           | 1 |
|                                                                                                                                                     |      |       |      |      |   |   | 2 | MLMMALLVPLVYTIKR              | 1 |
|                                                                                                                                                     |      |       |      |      |   |   | 3 | TQPNLDNC[330]PFHDQPHLK        | 2 |
| CYTC_HUMAN (P01034) Cystatin C precursor (Neuroendocrine basic polypeptide) (Gamma-trace) (Post-gamma-globulin) [MASS=15799]                        | 0.85 | 11.64 | 0.63 | 0.76 | 2 | 1 | 2 | TQPNLDNC[339]PFHDQPHLK        | 1 |
|                                                                                                                                                     |      |       |      |      |   |   | 3 | KQLC[339]SFEIYVWPWENR         | 1 |
| CYTN_HUMAN (P01037) Cystatin SN precursor (Salivary cystatin SA-1) (Cystatin SA-1) [MASS=16362]                                                     | 0.00 | 11.35 | 0.44 | 0.00 | 1 | 1 | 3 | M[147]KIPPEKMR                | 2 |
| DC1L2_HUMAN (O43237) Cytoplasmic dynein 1 light intermediate chain 2 (Dynein light intermediate chain 2, cytosolic) (LIC53/55) (LIC-2) [MASS=54099] | *    | 1.83  | *    | *    | * | 1 | 2 |                               |   |

|                                                                                                                                                                          |      |       |      |      |    |   |   |                                   |   |
|--------------------------------------------------------------------------------------------------------------------------------------------------------------------------|------|-------|------|------|----|---|---|-----------------------------------|---|
| DDC_HUMAN (P20711) Aromatic-L-amino-acid decarboxylase (EC 4.1.1.28) (AADC) (DOPA decarboxylase) (DDC) [MASS=53894]                                                      | 0.00 | 4.58  | 0.11 | 0.00 | 1  | 1 | 2 | EDIWLHVDAAYAGSAFIC[330]PEFR       | 1 |
|                                                                                                                                                                          |      |       |      |      |    |   | 3 | ILPQDVILKFR                       | 3 |
| DDX27_HUMAN (Q96GQ7) Probable ATP-dependent RNA helicase DDX27 (EC 3.6.1.-) (DEAD box protein 27) [MASS=89835]                                                           | *    | 11.31 | *    | *    | *  | 6 | 2 | ARILPQDVILK                       | 1 |
|                                                                                                                                                                          |      |       |      |      |    |   | 3 | DIC[330]AC[330]AATGTGK            | 1 |
|                                                                                                                                                                          |      |       |      |      |    |   | 2 | M[147]HILLGLM[147]GLQVGLHGNLSQTQR | 1 |
|                                                                                                                                                                          |      |       |      |      |    |   | 2 | SQEAALRAAPDILIATPGR               | 1 |
|                                                                                                                                                                          |      |       |      |      |    |   | 3 | TFTDHVM[147]LFTQTK                | 1 |
| DDX58_HUMAN (O95786) Probable ATP-dependent RNA helicase DDX58 (EC 3.6.1.-) (DEAD-box protein 58) (Retinoic acid-inducible gene 1 protein) (RIG-1) (RIG-I) [MASS=106599] | *    | 1.84  | *    | *    | *  | 1 | 3 | DLENLSQIQNREFGTQK                 | 1 |
| DEST_HUMAN (P60981) Destrin (Actin-depolymerizing factor) (ADF) [MASS=18374]                                                                                             | 0.00 | 10.98 | 0.73 | 0.00 | 1  | 1 | 3 | FQGIKHEC[330]QANGPEDLNR           | 1 |
| DGAT1_HUMAN (O75907) Diacylglycerol O-acyltransferase 1 (EC 2.3.1.20) (Diglyceride acyltransferase) (ACAT-related gene product 1) [MASS=55278]                           | *    | 2.46  | *    | *    | *  | 1 | 2 | WC[330]IRHFYKPM[147]LR            | 1 |
| DGKQ_HUMAN (P52824) Diacylglycerol kinase theta (EC 2.7.1.107) (Diglyceride kinase theta) (DGK-theta) (DAG kinase theta) [MASS=101403]                                   | *    | 5.20  | *    | *    | *  | 3 | 2 | QVSQTRFYVAESR                     | 1 |
|                                                                                                                                                                          |      |       |      |      |    |   | 3 | LYMLLKDMAVRGR                     | 1 |
|                                                                                                                                                                          |      |       |      |      |    |   | 2 | VLVC[330]GGDGTGWVWLGAEETRYR       | 1 |
|                                                                                                                                                                          |      |       |      |      |    |   | 3 | AKPYEGSILEADC[339]DILIPAASEK      | 2 |
|                                                                                                                                                                          |      |       |      |      |    |   | 2 | AKPYEGSILEADC[339]DILIPAASEK      | 2 |
| DHE3_HUMAN (P00367) Glutamate dehydrogenase 1, mitochondrial precursor (EC 1.4.1.3) (GDH) [MASS=61397]                                                                   | 1.00 | 13.80 | 1.72 | 0.05 | 11 | 4 | 3 | AKPYEGSILEADC[330]DILIPAASEK      | 1 |
|                                                                                                                                                                          |      |       |      |      |    |   | 2 | IIKPC[339]NHVLSLSFPIR             | 2 |
|                                                                                                                                                                          |      |       |      |      |    |   | 2 | IIKPC[330]NHVLSLSFPIR             | 1 |
|                                                                                                                                                                          |      |       |      |      |    |   | 2 | C[339]AVVDVPFGGAK                 | 3 |
|                                                                                                                                                                          |      |       |      |      |    |   | 2 | AKPYEGSILEADC[330]DILIPAASEK      | 1 |
|                                                                                                                                                                          |      |       |      |      |    |   | 3 | PC[339]NHVLSLSFPIRRDDGSWEVIEGYR   | 1 |

|                                                                                                                                                                            |                          |       |      |      |    |   |   |                                               |   |
|----------------------------------------------------------------------------------------------------------------------------------------------------------------------------|--------------------------|-------|------|------|----|---|---|-----------------------------------------------|---|
| DHSA_HUMAN (P31040) Succinate dehydrogenase [ubiquinone] flavoprotein subunit, mitochondrial precursor (EC 1.3.5.1) (Fp) (Flavoprotein subunit of complex II) [MASS=72691] | 1.00                     | 19.13 | 1.57 | 0.03 | 12 | 6 | 3 | GC[339]GPEKDHVYLQLHHLPEQLATR                  | 1 |
|                                                                                                                                                                            |                          |       |      |      |    |   | 2 | LSMQKSMQNHAAVFR                               | 1 |
|                                                                                                                                                                            |                          |       |      |      |    |   | 3 | AGLPC[339]QDLEFVQFHPTGIYGAGC[339]LITEGC[339]R | 1 |
|                                                                                                                                                                            |                          |       |      |      |    |   | 2 | AC[339]ALSIEESC[339]RPGDK                     | 1 |
|                                                                                                                                                                            |                          |       |      |      |    |   | 3 | HVNGQDQIVPGLYAC[339]GEAAC[339]ASVHGANK        | 3 |
|                                                                                                                                                                            |                          |       |      |      |    |   | 3 | AGLPC[330]QDLEFVQFHPTGIYGAGC[330]LITEGC[330]R | 2 |
| DHSD_HUMAN (P21912) Succinate dehydrogenase [ubiquinone] iron-sulfur protein, mitochondrial precursor (EC 1.3.5.1) (Ip) (Iron-sulfur subunit of complex II) [MASS=31630]   | 1.00                     | 11.79 | 1.92 | 0.06 | 9  | 3 | 3 | GC[330]GPEKDHVYLQLHHLPEQLATR                  | 1 |
|                                                                                                                                                                            |                          |       |      |      |    |   | 2 | TLNEADC[339]ATVPPAIR                          | 1 |
|                                                                                                                                                                            |                          |       |      |      |    |   | 3 | HVNGQDQIVPGLYAC[330]GEAAC[330]ASVHGANK        | 2 |
|                                                                                                                                                                            |                          |       |      |      |    |   | 2 | C[330]HTIM[147]NC[330]TR                      | 1 |
|                                                                                                                                                                            |                          |       |      |      |    |   | 2 | C[339]HTIMNC[339]TR                           | 1 |
|                                                                                                                                                                            |                          |       |      |      |    |   | 2 | C[339]GPM[147]VLDALIK                         | 1 |
| 2                                                                                                                                                                          | C[339]HTIM[147]NC[339]TR | 6     |      |      |    |   |   |                                               |   |
| DIDO1_HUMAN (Q9BTC0) Death-inducer obliterator 1 (DIO-1) (Death-associated transcription factor 1) (DATF-1) (hDido1) [MASS=243871]                                         | *                        | 6.07  | *    | *    | *  | 7 | 2 | C[330]HTIM[147]NC[330]TRTC[330]PK             | 1 |
|                                                                                                                                                                            |                          |       |      |      |    |   | 3 | RLATETGEGEGEPLSRLSAR                          | 1 |
|                                                                                                                                                                            |                          |       |      |      |    |   | 1 | ASDAGTASQA                                    | 1 |
|                                                                                                                                                                            |                          |       |      |      |    |   | 2 | FHPATEEEVAYISLYSFSSRGR                        | 1 |
|                                                                                                                                                                            |                          |       |      |      |    |   | 2 | REQEPTER                                      | 1 |
|                                                                                                                                                                            |                          |       |      |      |    |   | 3 | DASRGLVQAPMPVPEEKEPASSPWASGEK                 | 1 |
| DJBP_HUMAN (Q5THR3) DJ-1-binding protein (CAP-binding protein complex-interacting protein 1) [MASS=172929]                                                                 | 0.00                     | 3.86  | 1.36 | 0.00 | 1  | 3 | 3 | TAPSSSC[330]TAVASAASRPDSTHMVEARQDVPK          | 1 |
|                                                                                                                                                                            |                          |       |      |      |    |   | 2 | GGAPFQFGGQRR                                  | 1 |
|                                                                                                                                                                            |                          |       |      |      |    |   | 2 | YFLQNFSC[330]FLEETADEWAEK                     | 1 |
|                                                                                                                                                                            |                          |       |      |      |    |   | 3 | ERLLGSASSEDIWRNYSLDEIER                       | 2 |
|                                                                                                                                                                            |                          |       |      |      |    |   | 2 | PC[339]AEDYFNFM[147]GHFTK                     | 1 |

|                                                                                                                                                                         |      |       |      |      |    |   |   |                                             |   |
|-------------------------------------------------------------------------------------------------------------------------------------------------------------------------|------|-------|------|------|----|---|---|---------------------------------------------|---|
| DLDH_HUMAN (P09622) Dihydrolipoyl dehydrogenase, mitochondrial precursor (EC 1.8.1.4) (Dihydrolipoamide dehydrogenase) (Glycine cleavage system L protein) [MASS=54150] | 1.00 | 19.84 | 1.55 | 0.04 | 13 | 4 | 3 | STDRVLGAHILGPGAGEMVNEAALALEYGASC[339]EDIAR  | 1 |
|                                                                                                                                                                         |      |       |      |      |    |   | 2 | VC[330]HAHPTLSEAFR                          | 2 |
|                                                                                                                                                                         |      |       |      |      |    |   | 2 | VLGAHILGPGAGEM[147]VNEAALALEYGASC[339]EDIAR | 1 |
|                                                                                                                                                                         |      |       |      |      |    |   | 3 | VLGAHILGPGAGEMVNEAALALEYGASC[339]EDIAR      | 1 |
|                                                                                                                                                                         |      |       |      |      |    |   | 3 | EEGIEYKVGKFFAANSR                           | 1 |
|                                                                                                                                                                         |      |       |      |      |    |   | 3 | VLGAHILGPGAGEM[147]VNEAALALEYGASC[339]EDIAR | 4 |
|                                                                                                                                                                         |      |       |      |      |    |   | 2 | VC[339]HAHPTLSEAFR                          | 5 |
| DLG1_HUMAN (Q12959) Disks large homolog 1 (Synapse-associated protein 97) (SAP-97) (hDlg) [MASS=100354]                                                                 | *    | 1.66  | *    | *    | *  | 1 | 2 | RLQIAQLYPISEFIK                             | 1 |
| DLG2_HUMAN (Q15700) Discs large homolog 2 (Postsynaptic density protein PSD-93) (Channel-associated protein of synapse-110) (Chapsyn-110) [MASS=97542]                  | *    | 3.22  | *    | *    | *  | 2 | 3 | LC[330]DKPASPRHYSPVEC[339]DK                | 1 |
|                                                                                                                                                                         |      |       |      |      |    |   | 3 | HMLVDDDYTR                                  | 1 |
|                                                                                                                                                                         |      |       |      |      |    |   | 3 | IIPGGAAMDGRLGVNDC[339]VLR                   | 4 |
| DLG3_HUMAN (Q92796) Discs large homolog 3 (Synapse-associated protein 102) (SAP102) (Neuroendocrine-DLG) (XLMR) [MASS=90343]                                            | *    | 6.36  | *    | *    | *  | 3 | 3 | HQHC[330]C[330]KC[330]PEC[330]YEVTR         | 1 |
|                                                                                                                                                                         |      |       |      |      |    |   | 2 | RDNEVDGQDYHFVVS                             | 1 |
| DLG5_HUMAN (Q8TDM6) Discs large homolog 5 (Placenta and prostate DLG) (Discs large protein P-dlg) [MASS=202085]                                                         | *    | 3.21  | *    | *    | *  | 3 | 3 | PLLPFETEVGPC[330]GVGEASLDKADSEGSNSGGTWP     | 1 |
|                                                                                                                                                                         |      |       |      |      |    |   | 3 | RLAFATHGTAFDKR                              | 1 |
|                                                                                                                                                                         |      |       |      |      |    |   | 2 | RPKSAPSFR                                   | 2 |
| DMXL2_HUMAN (Q8TDJ6) Protein DmX-like 2 (Rabconnectin-3) [MASS=339755]                                                                                                  | 0.00 | 2.83  | 2.24 | 0.00 | 1  | 4 | 2 | VESDLLDQEEMVDPKDIGSYER                      | 1 |
|                                                                                                                                                                         |      |       |      |      |    |   | 2 | C[339]IAGEVAIVRDPDAGEGTK                    | 3 |
|                                                                                                                                                                         |      |       |      |      |    |   | 3 | EDGSHILTVGVGANIFM[147]YGRLSGIVTEQTN         | 1 |
|                                                                                                                                                                         |      |       |      |      |    |   | 3 | LFSC[330]GADGTLKTR                          | 1 |

|                                                                                                                                                                              |                 |       |      |      |   |   |                                                                                                                            |                                          |      |   |   |   |   |   |                          |   |
|------------------------------------------------------------------------------------------------------------------------------------------------------------------------------|-----------------|-------|------|------|---|---|----------------------------------------------------------------------------------------------------------------------------|------------------------------------------|------|---|---|---|---|---|--------------------------|---|
| DNJA1_HUMAN (P31689) DnaJ homolog subfamily A member 1 (Heat shock 40 kDa protein 4) (DnaJ protein homolog 2) (HSJ-2) (HSDJ) [MASS=44868]                                    | *               | 3.02  | *    | *    | * | 1 | 2                                                                                                                          | C[330]VLNEGMPYRR                         | 1    |   |   |   |   |   |                          |   |
| DNL3_HUMAN (P49916) DNA ligase 3 (EC 6.5.1.1) (DNA ligase III) (Polydeoxyribonucleotide synthase [ATP] 3) [MASS=102690]                                                      | 0.00            | 9.44  | 0.25 | 0.00 | 1 | 5 | 2                                                                                                                          | IFNC[330]NPDDM[147]AR                    | 1    |   |   |   |   |   |                          |   |
|                                                                                                                                                                              |                 |       |      |      |   |   | 2                                                                                                                          | KFSGFSAK                                 | 1    |   |   |   |   |   |                          |   |
|                                                                                                                                                                              |                 |       |      |      |   |   | 2                                                                                                                          | VVPNPFSESGGDM[147]KEWYHIKC[339]M[147]FEK | 1    |   |   |   |   |   |                          |   |
|                                                                                                                                                                              |                 |       |      |      |   |   | 2                                                                                                                          | GGMMSIFLM[147]GC[330]YDPGSQKWC[339]TVTK  | 1    |   |   |   |   |   |                          |   |
|                                                                                                                                                                              |                 |       |      |      |   |   | 3                                                                                                                          | NGDHFSYFSRSLKPVLPKH                      | 1    |   |   |   |   |   |                          |   |
|                                                                                                                                                                              |                 |       |      |      |   |   | 2                                                                                                                          | QNTPLETPVGYTWIPM[147]LQNGRLK             | 1    |   |   |   |   |   |                          |   |
| DOCK7_HUMAN (Q96N67) Dedicator of cytokinesis protein 7 [MASS=174363]                                                                                                        | *               | 11.28 | *    | *    | * | 8 | 2                                                                                                                          | LPNTYPNSSSPGPGGLGGSVHYATMARS AVR         | 1    |   |   |   |   |   |                          |   |
|                                                                                                                                                                              |                 |       |      |      |   |   | 3                                                                                                                          | IVHQSTGWERM[147]FGTYFRVGFYGTK            | 1    |   |   |   |   |   |                          |   |
|                                                                                                                                                                              |                 |       |      |      |   |   | 2                                                                                                                          | QVSSKLYSLPNPSVLVSLRLDFLR                 | 1    |   |   |   |   |   |                          |   |
| DOCK8_HUMAN (Q8NF50) Dedicator of cytokinesis protein 8 [MASS=230819]                                                                                                        | *               | 1.23  | *    | *    | * | 1 | 2                                                                                                                          | ALSLEENGVGSNFKTSTLSVSSFFK                | 1    |   |   |   |   |   |                          |   |
|                                                                                                                                                                              |                 |       |      |      |   |   | DOCK9_HUMAN (Q9BZ29) Dedicator of cytokinesis protein 9 (Cdc42 guanine nucleotide exchange factor zizimin 1) [MASS=236444] | *                                        | 3.04 | * | * | * | 4 | 3 | LGQYRMPFAWAAR            | 1 |
|                                                                                                                                                                              |                 |       |      |      |   |   |                                                                                                                            |                                          |      |   |   |   |   | 2 | EAVQWEPPLPHSHSAC[330]LRR | 1 |
|                                                                                                                                                                              |                 |       |      |      |   |   |                                                                                                                            |                                          |      |   |   |   |   | 3 | GNMNSAISVTM[147]RSFK     | 1 |
| 3                                                                                                                                                                            | NQLLADHGHNPLMKK | 1     |      |      |   |   |                                                                                                                            |                                          |      |   |   |   |   |   |                          |   |
| DPCA2_HUMAN (Q86SG4) Dresden prostate carcinoma 2 protein (D-PCa-2) [MASS=20403]                                                                                             | *               | 6.40  | *    | *    | * | 1 | 2                                                                                                                          | GITLQKM[147]EMPK                         | 1    |   |   |   |   |   |                          |   |
| DPOD1_HUMAN (P28340) DNA polymerase delta catalytic subunit (EC 2.7.7.7) (DNA polymerase subunit delta p125) [MASS=123630]                                                   | 0.00            | 4.25  | 0.54 | 0.00 | 1 | 3 | 2                                                                                                                          | IAPLRVLSFDIEC[330]AGR                    | 1    |   |   |   |   |   |                          |   |
|                                                                                                                                                                              |                 |       |      |      |   |   | 3                                                                                                                          | FMVDTDIVGC[339]NWLELPAGKYALRLK           | 1    |   |   |   |   |   |                          |   |
|                                                                                                                                                                              |                 |       |      |      |   |   | 1                                                                                                                          | VQSYEK                                   | 1    |   |   |   |   |   |                          |   |
| DPYL2_HUMAN (Q16555) Dihydropyrimidinase-related protein 2 (DRP-2) (Collapsin response mediator protein 2) (CRMP-2) (N2A3) [MASS=62293]                                      | 1.00            | 5.59  | 0.65 | 0.12 | 4 | 2 | 2                                                                                                                          | THNSSLEYNIFEGM[147]EC[339]R              | 2    |   |   |   |   |   |                          |   |
|                                                                                                                                                                              |                 |       |      |      |   |   | 2                                                                                                                          | THNSSLEYNIFEGM[147]EC[330]R              | 1    |   |   |   |   |   |                          |   |
|                                                                                                                                                                              |                 |       |      |      |   |   | 2                                                                                                                          | GLYDGPVC[330]EVSVTPK                     | 1    |   |   |   |   |   |                          |   |
| DPYL3_HUMAN (Q14195) Dihydropyrimidinase-related protein 3 (DRP-3) (Unc-33-like phosphoprotein) (ULIP protein) (Collapsin response mediator protein 4) (CRMP-4) [MASS=61963] | *               | 4.74  | *    | *    | * | 1 | 3                                                                                                                          | WREWADGKSC[330]C[330]DYALHVDITHWNDSVK    | 1    |   |   |   |   |   |                          |   |

|                                                                                                                                                                   |      |       |      |      |   |   |                       |                                                                                                                                          |                       |
|-------------------------------------------------------------------------------------------------------------------------------------------------------------------|------|-------|------|------|---|---|-----------------------|------------------------------------------------------------------------------------------------------------------------------------------|-----------------------|
| DSCAM_HUMAN (O60469) Down syndrome cell adhesion molecule precursor (CHD2) [MASS=222258]                                                                          | *    | 3.83  | *    | *    | * | 4 | 3<br>2<br>2<br>3      | DNMPLELSGRFQKTVTGLLIENIR<br>TLGKEPQFSKEQELFASINTTR<br>KEM[147]SC[330]TAHGEKPIIVR<br>DAKSLAEMLM[147]SKNTR                                 | 1<br>1<br>1<br>1      |
| DYH11_HUMAN (Q96DT5) Ciliary dynein heavy chain 11 (Axonemal beta dynein heavy chain 11) [MASS=520977]                                                            | 0.00 | 1.81  | 1.85 | 0.00 | 1 | 4 | 2<br>3<br>2<br>2      | LERLEFGGTTKGAILNGQVHEMSEELMELC[330]K<br>GLVQTGAWGC[339]FDEFNR<br>SLIQKLILLRAMR<br>FHNVSLGQQQETVAEVALEKASK                                | 1<br>1<br>1<br>1      |
| DYHC_HUMAN (Q14204) Dynein heavy chain, cytosolic (DYHC) (Cytoplasmic dynein heavy chain 1) (DHC1) (Dynein heavy chain 1, cytoplasmic 1) [MASS=532404]            | *    | 1.57  | *    | *    | * | 4 | 1<br>2<br>3<br>3      | QDGDSEFRMK<br>LVQTPLTDR<br>C[330]YLTMTQALEARLGGSPFGPAGTGK<br>AM[147]LRLIPSLRITYAEPLTAAM[147]VEFYTM[147]SQER                              | 1<br>1<br>1<br>1      |
| DYN1_HUMAN (Q05193) Dynamin-1 (EC 3.6.5.5) [MASS=97407]                                                                                                           | *    | 7.06  | *    | *    | * | 3 | 2<br>3<br>2           | IEGSGDQIDTYELSGGARINR<br>NIHGIRTGLFTPDMAFETIVK<br>VYSPHVLNLTVDLPGM[147]TK                                                                | 1<br>1<br>1           |
| DYRL1_HUMAN (Q86XF0) Dihydrofolate reductase-like protein 1 [MASS=21620]                                                                                          | *    | 10.70 | *    | *    | * | 1 | 2                     | PELANKVDM[147]IWIVGGSSVYK                                                                                                                | 1                     |
| DYSF_HUMAN (O75923) Dysferlin (Dystrophy-associated fer-1-like protein) (Fer-1-like protein 1) [MASS=237293]                                                      | 0.00 | 4.47  | 0.24 | 0.00 | 1 | 5 | 2<br>3<br>2<br>2<br>3 | TSLC[330]VLGPGDEAPLER<br>ILEKTANPQWNQNITLPAFPSPMC[339]EK<br>HRQAEAEEGEGWEYASLFGWK<br>LGHSELPAALEQAEDWLLR<br>C[330]DPYIKISIGKK            | 1<br>1<br>1<br>1<br>1 |
| E2F5_HUMAN (Q15329) Transcription factor E2F5 (E2F-5) [MASS=37610]                                                                                                | 0.00 | 6.36  | *    | *    | * | 2 | 2<br>1                | SSM[147]ATQNLPEQHVSER<br>ESSSSK                                                                                                          | 1<br>1                |
| E41L1_HUMAN (Q9H4G0) Band 4.1-like protein 1 (Neuronal protein 4.1) (4.1N) [MASS=98502]                                                                           | 0.00 | 1.82  | *    | *    | * | 1 | 2                     | IRPGEYEQFESTIGFK                                                                                                                         | 1                     |
| E41L3_HUMAN (Q9Y2J2) Band 4.1-like protein 3 (4.1B) (Differentially expressed in adenocarcinoma of the lung protein 1) (DAL-1) [MASS=120677]                      | *    | 1.93  | *    | *    | * | 1 | 3                     | SMQC[330]KVILLDGSEYTC[330]DVEKR                                                                                                          | 1                     |
| EAA1_HUMAN (P43003) Excitatory amino acid transporter 1 (Sodium-dependent glutamate/aspartate transporter 1) (Glial glutamate transporter) (GLAST-1) [MASS=59572] | 0.99 | 16.79 | 0.81 | 0.10 | 2 | 4 | 2<br>2<br>2<br>3      | MLQMLVPLIISLVTGM[147]AALDSKASGKM[147]GM[147]R<br>NM[147]FPPNLVEAC[330]FK<br>VQNITKEDVKSYLFR<br>M[147]GMRAVVYYM[147]TTTTIAVVIGIIIVIIIHPGK | 1<br>2<br>1<br>1      |
| EAA2_HUMAN (P43004) Excitatory amino acid transporter 2 (Sodium-dependent glutamate/aspartate transporter 2) [MASS=62104]                                         | 1.00 | 5.40  | 0.45 | 0.11 | 5 | 2 | 2<br>2<br>2<br>2      | C[330]LEENLGIDKR<br>NLFPENLVQAC[330]FQQIQTVTK<br>NLFPENLVQAC[339]FQQIQTVTK<br>C[339]LEENLGIDKR                                           | 1<br>2<br>1<br>1      |

|                                                                                                                                                                                                                                                              |      |       |      |      |   |   |        |                                                                                   |        |
|--------------------------------------------------------------------------------------------------------------------------------------------------------------------------------------------------------------------------------------------------------------|------|-------|------|------|---|---|--------|-----------------------------------------------------------------------------------|--------|
| EBI2_HUMAN (P32249) EBV-induced G-protein coupled receptor 2 (EBI2) [MASS=41224]                                                                                                                                                                             | 0.00 | 16.34 | 1.03 | 0.00 | 1 | 2 | 3      | IEHAKGVC[339]IFVWILVFAQTLPLLINPM[147]SK<br>ALNTIILIVVFVLC[339]FTPYHVAIQHM[147]IKK | 1<br>1 |
| ECHA_HUMAN (P40939) Trifunctional enzyme subunit alpha, mitochondrial precursor (TP-alpha) (78 kDa gastrin-binding protein) [Includes: Long-chain enoyl-CoA hydratase (EC 4.2.1.17); Long chain 3-hydroxyacyl-CoA dehydrogenase (EC 1.1.1.211)] [MASS=82999] | 0.98 | 2.36  | 1.30 | 0.00 | 1 | 2 | 1<br>2 | FSAFR<br>ALM[147]GLYHGQVLC[339]K                                                  | 1<br>1 |
| ECHM_HUMAN (P30084) Enoyl-CoA hydratase, mitochondrial precursor (EC 4.2.1.17) (Short chain enoyl-CoA hydratase) (SCEH) (Enoyl-CoA hydratase 1) [MASS=31387]                                                                                                 | 0.94 | 13.10 | 1.76 | 0.00 | 1 | 2 | 2<br>2 | ALNALC[339]DGLIDELNQALK<br>C[339]PAWRPFASGANFEYIIAEK                              | 1<br>1 |
| ECHP_HUMAN (Q08426) Peroxisomal bifunctional enzyme (PBE) (PBFE) [Includes: Enoyl-CoA hydratase (EC 4.2.1.17); 3,2-trans-enoyl-CoA isomerase (EC 5.3.3.8); 3-hydroxyacyl-CoA dehydrogenase (EC 1.1.1.35)] [MASS=79208]                                       | *    | 4.29  | *    | *    | * | 2 | 3<br>3 | C[339]LYSLINEAFR<br>ELGGVDLVIEAVFEEM[147]SLKK                                     | 1<br>1 |
| EDN1_HUMAN (P05305) Endothelin-1 precursor (Preproendothelin-1) (PPET1) [Contains: Endothelin-1 (ET-1); Big endothelin-1] [MASS=24425]                                                                                                                       | *    | 3.77  | *    | *    | * | 1 | 2      | PTPSPWR                                                                           | 1      |
| EF1A1_HUMAN (P68104) Elongation factor 1-alpha 1 (EF-1-alpha-1) (Elongation factor 1 A-1) (eEF1A-1) (Elongation factor Tu) (EF-Tu) [MASS=50141]                                                                                                              | 0.99 | 6.28  | 2.50 | 0.00 | 1 | 1 | 2      | NM[147]ITGTSQADC[339]AVLIVAAGVGEFEAGISK                                           | 1      |
| EF1A2_HUMAN (Q05639) Elongation factor 1-alpha 2 (EF-1-alpha-2) (Elongation factor 1 A-2) (eEF1A-2) (Statin S1) [MASS=50470]                                                                                                                                 | 0.99 | 4.54  | *    | *    | * | 1 | 2      | EGNASGVSLLEALDILPPTR                                                              | 1      |



|                                                                                                                                                                                                                                                    |      |       |      |      |    |   |  |   |                                             |   |
|----------------------------------------------------------------------------------------------------------------------------------------------------------------------------------------------------------------------------------------------------|------|-------|------|------|----|---|--|---|---------------------------------------------|---|
|                                                                                                                                                                                                                                                    |      |       |      |      |    |   |  | 2 | KGDEC[330]ELLGHSK                           | 2 |
|                                                                                                                                                                                                                                                    |      |       |      |      |    |   |  | 3 | ELLTEFGYKGEETPVIVGSALC[339]ALEGRDPELGLK     | 1 |
|                                                                                                                                                                                                                                                    |      |       |      |      |    |   |  | 2 | KGDEC[339]ELLGHSK                           | 2 |
| EFTU_HUMAN (P49411) Elongation factor Tu, mitochondrial precursor (EF-Tu) (P43) [MASS=49541]                                                                                                                                                       | 1.00 | 31.86 | 1.78 | 0.08 | 12 | 6 |  | 3 | PFVSHFM[147]PVM[147]FSLTWDM[147]AC[339]R    | 1 |
|                                                                                                                                                                                                                                                    |      |       |      |      |    |   |  | 3 | HKPFVSHFMPVMFSLTWDM[147]AC[339]RIILPPEK     | 1 |
|                                                                                                                                                                                                                                                    |      |       |      |      |    |   |  | 2 | HYAHTDC[339]PGHADYVK                        | 3 |
|                                                                                                                                                                                                                                                    |      |       |      |      |    |   |  | 3 | HYAHTDC[339]PGHADYVK                        | 2 |
|                                                                                                                                                                                                                                                    |      |       |      |      |    |   |  | 2 | HYAHTDC[330]PGHADYVK                        | 1 |
|                                                                                                                                                                                                                                                    |      |       |      |      |    |   |  | 3 | NM[147]ITGTAPLDGC[339]ILVVAANDGPMPQTREHLLAR | 1 |
|                                                                                                                                                                                                                                                    |      |       |      |      |    |   |  | 3 | KGDEC[339]ELLGHSK                           | 1 |
| ENC1_HUMAN (O14682) Ectoderm-neural cortex 1 protein (ENC-1) (p53-induced protein 10) (Nuclear matrix protein NRP/B) [MASS=66129]                                                                                                                  | 0.00 | 2.21  | 2.83 | 0.00 | 1  | 1 |  | 2 | RYC[339]YLPPELLQTVR                         | 1 |
| ENOA_HUMAN (P06733) Alpha-enolase (EC 4.2.1.11) (2-phospho-D-glycerate hydro-lyase) (Non-neural enolase) (NNE) (Enolase 1) (Phosphopyruvate hydratase) (C-myc promoter-binding protein) (MBP-1) (MPB-1) (Plasminogen-binding protein) [MASS=47037] | *    | 3.23  | *    | *    | *  | 1 |  | 2 | SILKIHAREIFDSR                              | 1 |
| ENP2_HUMAN (Q9Y5L3) Ectonucleoside triphosphate diphosphohydrolase 2 (EC 3.6.1.-) (NTPDase2) (Ecto-ATPase) (CD39 antigen-like 1) [MASS=53665]                                                                                                      | *    | 8.08  | *    | *    | *  | 2 |  | 3 | VSLSGSSDPHLC[339]R                          | 4 |
|                                                                                                                                                                                                                                                    |      |       |      |      |    |   |  | 3 | DVREPPALKYGIVLDAGSSHTSMFIYK                 | 1 |
| EPHA1_HUMAN (P21709) Ephrin type-A receptor 1 precursor (EC 2.7.10.1) (Tyrosine-protein kinase receptor EPH) [MASS=108066]                                                                                                                         | *    | 4.51  | *    | *    | *  | 2 |  | 2 | PIM[147]IITEFMENGALDAFLRER                  | 1 |
|                                                                                                                                                                                                                                                    |      |       |      |      |    |   |  | 2 | RWPLGLGLVLLLC[339]APLPPGARAK                | 1 |
| EPHB1_HUMAN (P54762) Ephrin type-B receptor 1 precursor (EC 2.7.10.1) (Tyrosine-protein kinase receptor EPH-2) (NET) (HEK6) (ELK) [MASS=109885]                                                                                                    | *    | 2.34  | *    | *    | *  | 1 |  | 2 | LPPPMDC[339]PAALHQLMLDC[330]WQKDR           | 1 |

|                                                                                                                                                                                                                                                                              |      |       |      |      |   |   |   |                                                 |   |
|------------------------------------------------------------------------------------------------------------------------------------------------------------------------------------------------------------------------------------------------------------------------------|------|-------|------|------|---|---|---|-------------------------------------------------|---|
| EPHB3_HUMAN (P54753) Ephrin type-B receptor 3 precursor (EC 2.7.10.1) (Tyrosine-protein kinase receptor HEK-2) [MASS=110329]                                                                                                                                                 | *    | 7.41  | *    | *    | * | 3 | 3 | LYC[330]NGDGEWM[147]VPVGAC[330]TC[339]ATGHEPAAK | 1 |
|                                                                                                                                                                                                                                                                              |      |       |      |      |   |   | 3 | ESFVSAGFASF DLVAQM[147]TAEDLLR                  | 1 |
|                                                                                                                                                                                                                                                                              |      |       |      |      |   |   | 2 | LPPPM[147]DC[339]PTALHQLMLDC[339]WVRDR          | 1 |
| ERCC3_HUMAN (P19447) TFIIH basal transcription factor complex helicase XPB subunit (EC 3.6.1.-) (Basic transcription factor 2 89 kDa subunit) (BTF2-p89) (TFIIH 89 kDa subunit) (DNA-repair protein complementing XP-B cells) (Xeroderma pigmentosum group B-c) [MASS=89277] | *    | 3.96  | *    | *    | * | 2 | 2 | LAGM[147]EEEDLAFSTKEEQQLLQK                     | 1 |
|                                                                                                                                                                                                                                                                              |      |       |      |      |   |   | 2 | FHERRNDK                                        | 1 |
| ERF_HUMAN (P50548) ETS domain-containing transcription factor ERF (Ets2 repressor factor) [MASS=58703]                                                                                                                                                                       | 0.40 | 12.77 | 2.26 | 0.00 | 1 | 3 | 3 | LEGGGGPAGGFEDEGEDK                              | 1 |
|                                                                                                                                                                                                                                                                              |      |       |      |      |   |   | 2 | C[339]PLPPMAPETPPVPSSASSSSSSSSSPFK              | 1 |
|                                                                                                                                                                                                                                                                              |      |       |      |      |   |   | 2 | TPADTGFAFPDWAYKPESPPGSR                         | 1 |
| ERR2_HUMAN (O95718) Steroid hormone receptor ERR2 (Estrogen-related receptor, beta) (ERR-beta) (Estrogen receptor-like 2) (ERR beta-2) [MASS=55619]                                                                                                                          | 0.00 | 2.00  | 0.58 | 0.00 | 1 | 1 | 2 | C[330]EYM[147]LNAIPK                            | 1 |
| ES1_HUMAN (P30042) ES1 protein homolog, mitochondrial precursor (Protein KNP-I) (Protein GT335) [MASS=28142]                                                                                                                                                                 | 0.95 | 7.84  | 1.41 | 0.00 | 1 | 1 | 2 | EFHQAGKPIGLC[339]C[339]IAPVLAAK                 | 1 |
| ETFA_HUMAN (P13804) Electron transfer flavoprotein subunit alpha, mitochondrial precursor (Alpha-ETF) [MASS=35079]                                                                                                                                                           | *    | 4.80  | *    | *    | * | 1 | 2 | C[339]DKVAQDLC[330]KVAGIAK                      | 1 |
| ETFD_HUMAN (Q16134) Electron transfer flavoprotein-ubiquinone oxidoreductase, mitochondrial precursor (EC 1.5.5.1) (ETF-QO) (ETF-ubiquinone oxidoreductase) (ETF dehydrogenase) (Electron-transferring-flavoprotein dehydrogenase) [MASS=68507]                              | 0.94 | 3.24  | 2.29 | 0.00 | 1 | 2 | 1 | HKGSDFER                                        | 1 |
|                                                                                                                                                                                                                                                                              |      |       |      |      |   |   | 2 | LQINAQNC[339]VHC[339]K                          | 1 |
| EVX1_HUMAN (P49640) Homeobox even-skipped homolog protein 1 (EVX-1) [MASS=42439]                                                                                                                                                                                             | 0.00 | 5.90  | 0.41 | 0.00 | 1 | 1 | 2 | SNGGSGGGGSQGLAC[330]SASDQMRR                    | 1 |
| EYA3_HUMAN (Q99504) Eyes absent homolog 3 (EC 3.1.3.48) [MASS=62557]                                                                                                                                                                                                         | 0.00 | 3.32  | 1.06 | 0.00 | 1 | 1 | 2 | KNC[339]VNVLITTTQLVPALAK                        | 1 |
| F102B_HUMAN (Q5T8I3) Protein FAM102B [MASS=35629]                                                                                                                                                                                                                            | *    | 14.59 | *    | *    | * | 2 | 3 | FSFM[147]C[330]KMSASAATGILDPC[339]IYRVSVR       | 1 |
|                                                                                                                                                                                                                                                                              |      |       |      |      |   |   | 2 | QDNSILKVLISMQLMSGDPC[330]FK                     | 1 |

|                                                                                                                                                                                                                                                                        |      |      |      |      |   |   |        |                                                                   |        |
|------------------------------------------------------------------------------------------------------------------------------------------------------------------------------------------------------------------------------------------------------------------------|------|------|------|------|---|---|--------|-------------------------------------------------------------------|--------|
| F263_HUMAN (Q16875) 6-phosphofructo-2-kinase/fructose-2,6-biphosphatase 3 (6PF-2-K/Fru-2,6-P2ASE brain/placenta-type isozyme) (iPFK-2) (NY-REN-56 antigen) [Includes: 6-phosphofructo-2-kinase (EC 2.7.1.105); Fructose-2,6-bisphosphatase (EC 3.1.3.46)] [MASS=59609] | *    | 2.69 | *    | *    | * | 1 | 2      | RHMILHFAKENDFK                                                    | 1      |
| F264_HUMAN (Q16877) 6-phosphofructo-2-kinase/fructose-2,6-biphosphatase 4 (6PF-2-K/Fru-2,6-P2ASE testis-type isozyme) [Includes: 6-phosphofructo-2-kinase (EC 2.7.1.105); Fructose-2,6-bisphosphatase (EC 3.1.3.46)] [MASS=53908]                                      | *    | 7.05 | *    | *    | * | 2 | 3<br>2 | DLSYIKIMDVGQSYVVNR<br>SLAQFISDQNIKDLK                             | 1<br>1 |
| FA43B_HUMAN (Q6ZT52) Protein FAM43B [MASS=36776]                                                                                                                                                                                                                       | 0.52 | 4.86 | 0.74 | 0.00 | 1 | 1 | 2      | AVVLRC[330]HAVLLARAHK                                             | 1      |
| FA50B_HUMAN (Q9Y247) Protein FAM50B (XAP-5-like protein) [MASS=38708]                                                                                                                                                                                                  | *    | 3.69 | *    | *    | * | 1 | 2      | WEAYDPEKKWDK                                                      | 1      |
| FA54A_HUMAN (Q6P444) Protein FAM54A (DUF729 domain-containing protein 1) [MASS=43384]                                                                                                                                                                                  | 0.00 | 2.08 | 1.25 | 0.00 | 1 | 1 | 2      | MLPLEPC[330]R                                                     | 1      |
| FAAA_HUMAN (P16930) Fumarylacetoacetase (EC 3.7.1.2) (Fumarylacetoacetate hydrolase) (Beta-diketonase) (FAA) [MASS=46374]                                                                                                                                              | *    | 3.10 | *    | *    | * | 1 | 2      | PDDSKPPVYGAC[330]K                                                | 1      |
| FAM3C_HUMAN (Q92520) Protein FAM3C precursor (Protein GS3786) [MASS=24680]                                                                                                                                                                                             | *    | 8.37 | *    | *    | * | 1 | 2      | MDASLG NFLFARSALDTAAR                                             | 1      |
| FANCM_HUMAN (Q8IYD8) Fanconi anemia group M protein (EC 3.6.1.-) (ATP-dependent RNA helicase FANCM) (Protein FACM) (Fanconi anemia-associated polypeptide of 250 kDa) (FAAP250) (Protein Hef ortholog) [MASS=232190]                                                   | *    | 1.66 | *    | *    | * | 2 | 3<br>2 | SC[330]LYDIPNDNISDEPSLC[330]DC[330]DVHK<br>STPRVNPLAK             | 1<br>1 |
| FARP1_HUMAN (Q9Y4F1) FERM, RhoGEF and pleckstrin domain-containing protein 1 (Chondrocyte-derived ezrin-like protein) [MASS=118632]                                                                                                                                    | 0.00 | 4.88 | 1.41 | 0.00 | 1 | 2 | 2<br>3 | DC[339]RAALAEITEM[147]VAQLHGTMIK<br>PPPTPSGKLVSIKIQMLDDTQEAFEVPQR | 1<br>1 |

|                                                                                                                                                                                                                          |      |      |      |      |   |   |   |                                                      |   |
|--------------------------------------------------------------------------------------------------------------------------------------------------------------------------------------------------------------------------|------|------|------|------|---|---|---|------------------------------------------------------|---|
| FARP2_HUMAN (O94887) FERM, RhoGEF and pleckstrin domain-containing protein 2 (FERM domain including RhoGEF) (FIR) [MASS=119888]                                                                                          | 0.00 | 5.79 | 6.03 | 0.00 | 1 | 3 | 3 | EDAM[147]PATLM[147]TLLFSNIDPIYEFHRGFLREVEQR          | 1 |
|                                                                                                                                                                                                                          |      |      |      |      |   |   | 2 | IC[339]VEYHTFFR                                      | 1 |
|                                                                                                                                                                                                                          |      |      |      |      |   |   | 3 | LEMYGIRFHMASDREGTK                                   | 1 |
|                                                                                                                                                                                                                          |      |      |      |      |   |   | 2 | INGYPKRGR                                            | 1 |
| FBN1_HUMAN (P35555) Fibrillin-1 precursor [MASS=312312]                                                                                                                                                                  | 0.44 | 3.66 | *    | *    | * | 6 | 2 | TLPGGNQC[330]IVPIC[330]R                             | 1 |
|                                                                                                                                                                                                                          |      |      |      |      |   |   | 3 | NSPGSFIC[330]EC[339]SSESTLDPTKTIC[330]IETIK          | 1 |
|                                                                                                                                                                                                                          |      |      |      |      |   |   | 2 | C[339]LC[339]YDGFMD[147]ASEDM[147]K                  | 1 |
|                                                                                                                                                                                                                          |      |      |      |      |   |   | 3 | SIQHC[339]NIRC[330]MNGGSC[339]SDDHC[330]LC[339]QK    | 1 |
|                                                                                                                                                                                                                          |      |      |      |      |   |   | 3 | NM[147]C[339]LNGM[147]C[330]INEDGSFK                 | 1 |
| FBN2_HUMAN (P35556) Fibrillin-2 precursor [MASS=314347]                                                                                                                                                                  | 0.44 | 3.30 | 0.36 | 0.00 | 1 | 4 | 2 | LC[339]M[147]DGLPMGGIPGSAGSR                         | 1 |
|                                                                                                                                                                                                                          |      |      |      |      |   |   | 2 | GMMC[339]KNLIGTFMC[339]IC[339]PPGM[147]AR            | 1 |
|                                                                                                                                                                                                                          |      |      |      |      |   |   | 3 | PC[330]EPC[330]PTPGTADFKTIC[339]GNIPGFTFDIHTGK       | 1 |
|                                                                                                                                                                                                                          |      |      |      |      |   |   | 3 | C[339]M[147]NTFGSYEC[330]TC[330]PIGYALREDQKMC[330]JK | 1 |
| FBW1A_HUMAN (Q9Y297) F-box/WD repeat protein 1A (F-box and WD repeats protein beta-TrCP) (E3RSI $\kappa$ B) (p $\kappa$ B $\alpha$ -E3 receptor subunit) [MASS=68866]                                                    | *    | 2.81 | *    | *    | * | 1 | 3 | VLVGHRAAVNVDFDDK                                     | 1 |
| FBX25_HUMAN (Q8TCJ0) F-box only protein 25 [MASS=43312]                                                                                                                                                                  | 0.00 | 7.63 | 1.56 | 0.00 | 1 | 1 | 3 | C[339]NISHSIILNSEDGEIFNNEEHEYASKK                    | 1 |
| FBX5_HUMAN (Q9UKT4) F-box only protein 5 (Early mitotic inhibitor 1) [MASS=50146]                                                                                                                                        | *    | 4.92 | *    | *    | * | 1 | 2 | C[339]DFNC[330]NHVHSGGLKLVKPDIDGR                    | 1 |
| FBXL4_HUMAN (Q9UKA2) F-box/LRR-repeat protein 4 (F-box and leucine-rich repeat protein 4) (F-box protein FBL4/FBL5) [MASS=70096]                                                                                         | 0.00 | 8.70 | 1.06 | 0.00 | 1 | 3 | 1 | PVLSLK                                               | 1 |
|                                                                                                                                                                                                                          |      |      |      |      |   |   | 2 | TSLIDM[147]NDIEDDAYAEKDGC[339]GMDSLNNK               | 1 |
|                                                                                                                                                                                                                          |      |      |      |      |   |   | 3 | MSPVFPM[147]LTVLTMFYIIC[339]LR                       | 1 |
| FCN3_HUMAN (O75636) Ficolin-3 precursor (Collagen/fibrinogen domain-containing protein 3) (Collagen/fibrinogen domain-containing lectin 3 p35) (Hakata antigen) [MASS=32903]                                             | 0.00 | 6.69 | 0.36 | 0.00 | 1 | 1 | 2 | GEPGDPVNULLRC[330]QEGPRNC[330]R                      | 1 |
| FCRL2_HUMAN (Q96LA5) Fc receptor-like protein 2 precursor (SH2 domain-containing phosphatase anchor protein 1) (Fc receptor homolog 2) (FcRH2) (Immunoglobulin receptor translocation-associated 4 protein) [MASS=55541] | 0.00 | 3.94 | 0.25 | 0.00 | 1 | 1 | 2 | SPGAQAAVGDILLELHC[330]EALR                           | 1 |

|                                                                                                                                                                                           |      |       |      |      |   |   |   |                                                |   |
|-------------------------------------------------------------------------------------------------------------------------------------------------------------------------------------------|------|-------|------|------|---|---|---|------------------------------------------------|---|
| FCRL_HUMAN (Q7L513) Fc receptor-like and mucin-like 1 precursor (Fc receptor homolog expressed in B-cells) (Fc receptor-related protein X) (FcRX) (Fc receptor-like protein) [MASS=38927] | *    | 6.96  | *    | *    | * | 1 | 3 | AVPSAEPQAGSPMTLSC[330]QTKLPLQR                 | 1 |
| FGD2_HUMAN (Q7Z6J4) FYVE, RhoGEF and PH domain-containing protein 2 (Zinc finger FYVE domain-containing protein 4) [MASS=74892]                                                           | *    | 9.62  | *    | *    | * | 3 | 3 | IGDVIQKLAPFLKM[147]YSEYVK                      | 1 |
|                                                                                                                                                                                           |      |       |      |      |   |   | 2 | TARSSKAFPEDVVR                                 | 1 |
|                                                                                                                                                                                           |      |       |      |      |   |   | 3 | AAAQGPEGDIQEELQSEELGLRAPQWVR                   | 2 |
| FGD3_HUMAN (Q5JSP0) FYVE, RhoGEF and PH domain-containing protein 3 (Zinc finger FYVE domain-containing protein 5) [MASS=79400]                                                           | *    | 2.48  | *    | *    | * | 1 | 3 | SLELISTAANHSNAAIRK                             | 1 |
| FGD5_HUMAN (Q6ZNL6) FYVE, RhoGEF and PH domain-containing protein 5 (Zinc finger FYVE domain-containing protein 23) [MASS=159906]                                                         | *    | 5.47  | *    | *    | * | 4 | 2 | NTLAVANM[147]KVSRPVMEK                         | 1 |
|                                                                                                                                                                                           |      |       |      |      |   |   | 2 | LRASESPSSLIFYR                                 | 1 |
|                                                                                                                                                                                           |      |       |      |      |   |   | 2 | VPSALTEVAASGEGSAISGYLSR                        | 1 |
|                                                                                                                                                                                           |      |       |      |      |   |   | 3 | PPTLVPVTHVMM[147]C[339]MNC[330]GC[330]DFSLTLRR | 1 |
| FGF22_HUMAN (Q9HCT0) Fibroblast growth factor 22 precursor (FGF-22) [MASS=19662]                                                                                                          | 0.00 | 4.12  | 0.78 | 0.00 | 1 | 1 | 2 | LYTVDC[339]R                                   | 1 |
| FHL2_HUMAN (Q14192) Four and a half LIM domains protein 2 (FHL-2) (Skeletal muscle LIM-protein 3) (SLIM 3) (LIM-domain protein DRAL) [MASS=32196]                                         | *    | 11.11 | *    | *    | * | 2 | 2 | C[330]SLSLVGR                                  | 2 |
|                                                                                                                                                                                           |      |       |      |      |   |   | 3 | EESPYC[330]VVC[330]FETLFANTC[339]EEC[339]GK    | 1 |
| FIBB_HUMAN (P02675) Fibrinogen beta chain precursor [Contains: Fibrinopeptide B] [MASS=55928]                                                                                             | *    | 12.83 | *    | *    | * | 3 | 2 | MGPTELLIEMEDWK                                 | 1 |
|                                                                                                                                                                                           |      |       |      |      |   |   | 2 | SQGVNDNEEGFFSARGHRPLDK                         | 1 |
|                                                                                                                                                                                           |      |       |      |      |   |   | 3 | VYC[339]DMNTENGGWTVIQNRQDGSVDFGR               | 1 |
| FIP1_HUMAN (Q6UN15) Pre-mRNA 3'-end-processing factor FIP1 (FIP1-like 1) (Factor interacting with PAP) (hFip1) (Rearranged in hypereosinophilia) [MASS=66526]                             | 0.00 | 3.37  | 1.44 | 0.00 | 1 | 1 | 2 | ITAEDC[339]TMEVTPGAEIQDGR                      | 1 |
| FKBP2_HUMAN (P26885) FK506-binding protein 2 precursor (EC 5.2.1.8) (Peptidyl-prolyl cis-trans isomerase) (PPlase) (Rotamase) (13 kDa FKBP) (FKBP-13) [MASS=15649]                        | *    | 7.04  | *    | *    | * | 1 | 2 | RVDHC[330]PIKSR                                | 1 |
| FLIP1_HUMAN (Q7Z7B0) Filamin-A-interacting protein 1 (FILIP) [MASS=138108]                                                                                                                | *    | 1.57  | *    | *    | * | 1 | 2 | GTQSVSGQDGSSQRPTPTR                            | 1 |

|                                                                                                                                                                                                                           |      |       |      |      |   |   |   |                                               |   |
|---------------------------------------------------------------------------------------------------------------------------------------------------------------------------------------------------------------------------|------|-------|------|------|---|---|---|-----------------------------------------------|---|
| FLNC_HUMAN (Q14315) Filamin-C (Gamma-filamin) (Filamin-2) (Protein FLNc) (Actin-binding-like protein) (ABP-L) (ABP-280-like protein) [MASS=290957]                                                                        | *    | 3.12  | *    | *    | * | 4 | 3 | SSHTYTRTER                                    | 1 |
|                                                                                                                                                                                                                           |      |       |      |      |   |   | 3 | DAGEGGLSLAVEGPSKAEITC[339]KDNK                | 1 |
|                                                                                                                                                                                                                           |      |       |      |      |   |   | 2 | AAGKGDCLKLYAQDADGC[339]PIDIK                  | 1 |
|                                                                                                                                                                                                                           |      |       |      |      |   |   | 3 | FIPHENGVHSIDVKFNAGAHIPGSPFKIR                 | 1 |
| FMO2_HUMAN (Q99518) Dimethylaniline monooxygenase [N-oxide-forming] 2 (EC 1.14.13.8) (Pulmonary flavin-containing monooxygenase 2) (FMO 2) (Dimethylaniline oxidase 2) (FMO 1B1) [MASS=60776]                             | 0.00 | 2.43  | 1.55 | 0.00 | 1 | 1 | 2 | LLC[339]GAIKVKSTVK                            | 1 |
| FOLC_HUMAN (Q05932) Folylpolyglutamate synthase, mitochondrial precursor (EC 6.3.2.17) (Folylpoly-gamma-glutamate synthetase) (FPGS) (Tetrahydrofolate synthase) (Tetrahydrofolylpolyglutamate synthase) [MASS=64609]     | *    | 1.19  | *    | *    | * | 1 | 1 | DPAALLK                                       | 2 |
| FRAP_HUMAN (P42345) FKBP12-rapamycin complex-associated protein (FK506-binding protein 12-rapamycin complex-associated protein 1) (Rapamycin target protein) (RAPT1) (Mammalian target of rapamycin) (mTOR) [MASS=288890] | *    | 4.47  | *    | *    | * | 5 | 3 | M[147]LTNAMEVTGLDGNRYITC[339]HTVMEVLRHK       | 1 |
|                                                                                                                                                                                                                           |      |       |      |      |   |   | 3 | ILKNM[147]C[330]EHSNTLVQQAM[147]M[147]VSEELIR | 1 |
|                                                                                                                                                                                                                           |      |       |      |      |   |   | 2 | TGTTVPESIHSFIGDGLVK                           | 1 |
|                                                                                                                                                                                                                           |      |       |      |      |   |   | 3 | SLVVSPHEDM[147]RTWLKYASLC[330]GK              | 1 |
|                                                                                                                                                                                                                           |      |       |      |      |   |   | 2 | NVKGM[147]FEVLEPLHAMMER                       | 1 |
| FREM1_HUMAN (Q5H8C1) FRAS1-related extracellular matrix protein 1 precursor (Protein QBRICK) [MASS=244122]                                                                                                                | *    | 2.71  | *    | *    | * | 3 | 3 | WSHIEWSQTEYEVVC[330]ENVGLLPLEIIR              | 1 |
|                                                                                                                                                                                                                           |      |       |      |      |   |   | 2 | TISVEVIPVNDKPM[147]LSKK                       | 1 |
|                                                                                                                                                                                                                           |      |       |      |      |   |   | 2 | LKC[339]PGGSC[339]TPGLKK                      | 1 |
| FRS3_HUMAN (O43559) Fibroblast growth factor receptor substrate 3 (FGFR substrate 3) (Suc1-associated neurotrophic factor target 2) (SNT-2) (FGFR signaling adaptor SNT2) [MASS=54330]                                    | *    | 6.11  | *    | *    | * | 1 | 2 | APQPPNALGYTVSSFSNGC[330]PGEGPRFSAPR           | 1 |
| FXL16_HUMAN (Q8N461) F-box/LRR-repeat protein 16 (F-box and leucine-rich repeat protein 16) [MASS=51641]                                                                                                                  | 0.00 | 5.01  | *    | *    | * | 1 | 3 | C[330]VRITDTGLSYLSTMSLRSLYLR                  | 1 |
| FXL18_HUMAN (Q96ME1) F-box/LRR-repeat protein 18 (F-box and leucine-rich repeat protein 18) [MASS=88341]                                                                                                                  | *    | 3.73  | *    | *    | * | 1 | 3 | SLSLPVC[330]SVADSAPRADRAPAQPAMHAVPR           | 1 |
| FXVD6_HUMAN (Q9H0Q3) FXVD domain-containing ion transport regulator 6 precursor [MASS=10542]                                                                                                                              | *    | 24.21 | *    | *    | * | 1 | 2 | M[147]ELVLVFLC[330]SLLAPMVLASAAEK             | 1 |

|                                                                                                                                                                                                                                                                             |      |       |      |      |   |   |                  |                                                                                                                  |                  |
|-----------------------------------------------------------------------------------------------------------------------------------------------------------------------------------------------------------------------------------------------------------------------------|------|-------|------|------|---|---|------------------|------------------------------------------------------------------------------------------------------------------|------------------|
| FXD8_HUMAN (P58550) FXD domain-containing ion transport regulator 8 precursor [MASS=10590]                                                                                                                                                                                  | 0.00 | 13.83 | 0.95 | 0.00 | 1 | 1 | 2                | C[339]SFNQKQDPGDK                                                                                                | 1                |
| FYV1_HUMAN (Q9Y2I7) FYVE finger-containing phosphoinositide kinase (EC 2.7.1.68) (1-phosphatidylinositol-4-phosphate 5-kinase) (Phosphatidylinositol-3-phosphate 5-kinase type III) (PIP5K) (PtdIns(4)P-5-kinase) (PIKfyve) (p235) [MASS=237107]                            | 0.00 | 3.57  | 0.02 | 0.00 | 1 | 4 | 2<br>3<br>3<br>2 | AFRDPLQDDTGLYVTEEVTSSEDK<br>SIQVLPSHELVSTR<br>C[330]C[339]NQEIPGKFMGYTGDLRAC[339]TYC[339]R<br>EPSSIIAFALSC[330]K | 1<br>1<br>1<br>1 |
| FZD4_HUMAN (Q9ULV1) Frizzled-4 precursor (Fz-4) (hFz4) (FzE4) [MASS=59881]                                                                                                                                                                                                  | 0.00 | 5.59  | 0.61 | 0.00 | 1 | 1 | 3                | IFM[147]SLLVGITSGM[147]WIWSAKTLHTWQKC[330]SNR                                                                    | 1                |
| G109A_HUMAN (Q8TDS4) Nicotinic acid receptor 1 (G-protein coupled receptor 109A) (G-protein coupled receptor HM74A) [MASS=41849]                                                                                                                                            | 0.00 | 14.88 | 1.83 | 0.00 | 1 | 2 | 2<br>3           | AITFIMVVAIVVIC[330]FLPSVVVR<br>FGDIPC[330]RLMLFM[147]LAM[147]NRQGSIIFLTVAVDR                                     | 1<br>1           |
| G3P_HUMAN (P04406) Glyceraldehyde-3-phosphate dehydrogenase (EC 1.2.1.12) (GAPDH) [MASS=35922]                                                                                                                                                                              | 1.00 | 9.28  | 0.68 | 0.11 | 4 | 2 | 2<br>2           | VPTANVSVVDLTC[330]R<br>IISNASC[330]TTNC[330]LAPLAK                                                               | 2<br>2           |
| GABT_HUMAN (P80404) 4-aminobutyrate aminotransferase, mitochondrial precursor (EC 2.6.1.19) ((S)-3-amino-2-methylpropionate transaminase) (EC 2.6.1.22) (Gamma-amino-N-butyrate transaminase) (GABA transaminase) (GABA aminotransferase) (GABA-AT) (GABA-T) ( [MASS=56439] | 0.99 | 2.20  | 1.31 | 0.09 | 3 | 1 | 2<br>2           | TM[147]GC[330]LATTHSK<br>TM[147]GC[339]LATTHSK                                                                   | 1<br>2           |
| GAH2_HUMAN (P63118) HERV-H_3q26 provirus ancestral Gag polyprotein (Gag polyprotein) [MASS=23279]                                                                                                                                                                           | 0.00 | 14.95 | 0.52 | 0.00 | 1 | 2 | 2<br>3           | KMGKWSEVPYVQAFFTLR<br>C[330]LIFFC[330]NTAWPQYK                                                                   | 1<br>2           |
| GATM_HUMAN (P50440) Glycine amidinotransferase, mitochondrial precursor (EC 2.1.4.1) (L-arginine:glycine amidinotransferase) (Transamidinase) (AT) [MASS=48455]                                                                                                             | *    | 9.22  | *    | *    | * | 2 | 2<br>2           | YKTPDFESTGLYSAM[147]PR<br>GAEAVHYIGSRLGRTLGTGWVQR                                                                | 1<br>1           |

|                                                                                                                                                        |      |       |      |      |    |   |  |   |                                                |   |
|--------------------------------------------------------------------------------------------------------------------------------------------------------|------|-------|------|------|----|---|--|---|------------------------------------------------|---|
|                                                                                                                                                        |      |       |      |      |    |   |  | 2 | LFVSGAC[330]DASAK                              | 1 |
|                                                                                                                                                        |      |       |      |      |    |   |  | 3 | QTFTGHESDINAIC[330]FFPNGNAFATGSDDATC[330]R     | 2 |
|                                                                                                                                                        |      |       |      |      |    |   |  | 2 | KAC[330]ADATLSQITNNIDPVGR                      | 2 |
| GBB1_HUMAN (P62873) Guanine nucleotide-binding protein G(I)/G(S)/G(T) subunit beta 1 (Transducin beta chain 1) [MASS=37246]                            | 1.00 | 22.71 | 0.60 | 0.38 | 15 | 4 |  | 2 | LFVSGAC[339]DASAK                              | 1 |
|                                                                                                                                                        |      |       |      |      |    |   |  | 2 | KAC[339]ADATLSQITNNIDPVGR                      | 1 |
|                                                                                                                                                        |      |       |      |      |    |   |  | 2 | ELAGHTGYLSC[339]C[339]R                        | 2 |
|                                                                                                                                                        |      |       |      |      |    |   |  | 2 | ELAGHTGYLSC[330]C[330]R                        | 6 |
|                                                                                                                                                        |      |       |      |      |    |   |  | 2 | ELPGHTGYLSC[339]C[339]R                        | 3 |
| GBB2_HUMAN (P62879) Guanine nucleotide-binding protein G(I)/G(S)/G(T) subunit beta 2 (Transducin beta chain 2) (G protein beta 2 subunit) [MASS=37200] | 1.00 | 3.83  | *    | *    | *  | 1 |  | 2 | ELPGHTGYLSC[330]C[330]R                        | 6 |
|                                                                                                                                                        |      |       |      |      |    |   |  |   |                                                |   |
| GBB3_HUMAN (P16520) Guanine nucleotide-binding protein G(I)/G(S)/G(T) subunit beta 3 (Transducin beta chain 3) [MASS=37221]                            | 0.00 | 14.41 | 0.68 | 0.00 | 1  | 2 |  | 3 | SERVGILSGHDNRVSC[330]LGVTADGM[147]AVATGSWDSFLK | 1 |
|                                                                                                                                                        |      |       |      |      |    |   |  | 2 | ELSAHTGYLSC[330]C[330]R                        | 2 |
| GBB4_HUMAN (Q9HAV0) Guanine nucleotide-binding protein subunit beta 4 (Transducin beta chain 4) [MASS=37436]                                           | 1.00 | 5.90  | 0.62 | 0.11 | 9  | 1 |  | 2 | KAC[339]NDATLVQITSNM[147]DSVGR                 | 1 |
|                                                                                                                                                        |      |       |      |      |    |   |  | 3 | AAADLM[147]AYC[339]EAHAKEDPLLTPVPAENPFR        | 2 |
| GBG2_HUMAN (P59768) Guanine nucleotide-binding protein G(I)/G(S)/G(O) gamma-2 subunit precursor (G gamma-I) [MASS=7719]                                | 1.00 | 62.86 | 0.54 | 0.21 | 7  | 2 |  | 2 | AAADLM[147]AYC[339]EAHAKEDPLLTPVPAENPFR        | 1 |
|                                                                                                                                                        |      |       |      |      |    |   |  | 3 | AAADLM[147]AYC[330]EAHAKEDPLLTPVPAENPFR        | 2 |
|                                                                                                                                                        |      |       |      |      |    |   |  | 2 | AAADLM[147]AYC[330]EAHAK                       | 2 |
| GBG3_HUMAN (P63215) Guanine nucleotide-binding protein G(I)/G(S)/G(O) gamma-3 subunit precursor [MASS=8305]                                            | 1.00 | 40.00 | 0.80 | 0.22 | 3  | 1 |  | 3 | AAADLM[147]TYC[339]DAHAC[339]EDPLITPVPTSENPFRR | 1 |
|                                                                                                                                                        |      |       |      |      |    |   |  | 3 | AAADLMTYC[339]DAHAC[339]EDPLITPVPTSENPFRR      | 1 |
|                                                                                                                                                        |      |       |      |      |    |   |  | 3 | AAADLM[147]TYC[330]DAHAC[339]EDPLITPVPTSENPFRR | 1 |
|                                                                                                                                                        |      |       |      |      |    |   |  | 3 | AAADLM[147]TYC[330]DAHAC[330]EDPLITPVPTSENPFRR | 1 |



|                                                                                                                                                |      |       |      |      |   |   |   |                                       |   |
|------------------------------------------------------------------------------------------------------------------------------------------------|------|-------|------|------|---|---|---|---------------------------------------|---|
| GBG7_HUMAN (O60262) Guanine nucleotide-binding protein G(I)/G(S)/G(O) gamma-7 subunit precursor [MASS=7522]                                    | *    | 69.12 | *    | *    | * | 2 | 2 | LVEQLRIEAGIERIK                       | 1 |
|                                                                                                                                                |      |       |      |      |   |   | 2 | AASDLMSYC[339]EQHARNDPLLVGVPASENPFKDK | 1 |
| GBRT_HUMAN (Q9UN88) Gamma-aminobutyric-acid receptor theta subunit precursor (GABA(A) receptor) [MASS=72021]                                   | 0.00 | 6.96  | 0.98 | 0.00 | 1 | 2 | 3 | WSRFLFPLAFGLFNIVYVYHMY                | 1 |
|                                                                                                                                                |      |       |      |      |   |   | 2 | C[330]DTNSTWGLNDDELMAHGQEK            | 1 |
| GCF_HUMAN (P16383) GC-rich sequence DNA-binding factor (GCF) (Transcription factor 9) (TCF-9) [MASS=91001]                                     | *    | 1.53  | *    | *    | * | 1 | 3 | APGVPPKRLPAR                          | 1 |
| GCM2_HUMAN (O75603) Chorion-specific transcription factor GCMb (Glial cells missing homolog 2) (GCM motif protein 2) (hGCMb) [MASS=56609]      | 0.00 | 5.53  | 6.02 | 0.00 | 1 | 2 | 3 | TNHGQFQAM[147]ATRPYYNPELPC[339]R      | 1 |
|                                                                                                                                                |      |       |      |      |   |   | 1 | PSLVER                                | 1 |
| GCP2_HUMAN (Q9BSJ2) Gamma-tubulin complex component 2 (GCP-2) (Spindle pole body protein Spc97 homolog) (hSpc97) (hGCP2) (h103p) [MASS=102533] | 0.00 | 6.32  | *    | *    | * | 3 |   |                                       |   |

|                                                                                                                                                |      |      |   |   |   |   |
|------------------------------------------------------------------------------------------------------------------------------------------------|------|------|---|---|---|---|
| GCP2_HUMAN (Q9BSJ2) Gamma-tubulin complex component 2 (GCP-2) (Spindle pole body protein Spc97 homolog) (hSpc97) (hGCP2) (h103p) [MASS=102533] | 0.00 | 6.32 | * | * | * | 3 |
|------------------------------------------------------------------------------------------------------------------------------------------------|------|------|---|---|---|---|

|                                                                                                                                                |      |      |   |   |   |   |                                                |   |
|------------------------------------------------------------------------------------------------------------------------------------------------|------|------|---|---|---|---|------------------------------------------------|---|
| GCP2_HUMAN (Q9BSJ2) Gamma-tubulin complex component 2 (GCP-2) (Spindle pole body protein Spc97 homolog) (hSpc97) (hGCP2) (h103p) [MASS=102533] | 0.00 | 6.32 | * | * | * | 3 | 3 VFSKLM[147]SVC[330]VMFTNC[330]M[147]QKFTQSMK | 1 |
|                                                                                                                                                |      |      |   |   |   |   | 3 RYFLMDQGDFVHFM[147]DLAEEELR                  | 1 |
| GCP_HUMAN (Q9NPF4) Probable O-sialoglycoprotein endopeptidase (EC 3.4.24.57) (hOSGEP) [MASS=36427]                                             | *    | 5.37 | * | * | * | 1 | 3 FC[330]IDNGAM[147]IAQAGWEM[147]FR            | 1 |

|                                                                                                                                                                      |      |       |      |      |    |   |   |                                           |   |
|----------------------------------------------------------------------------------------------------------------------------------------------------------------------|------|-------|------|------|----|---|---|-------------------------------------------|---|
| GCST_HUMAN (P48728)<br>Aminomethyltransferase, mitochondrial precursor (EC 2.1.2.10) (Glycine cleavage system T protein) (GCVT) [MASS=43946]                         | 0.00 | 7.69  | 1.29 | 0.00 | 1  | 1 | 3 | LEAGLC[339]LYGNDIDEHTTPVEGSLSWTLGKRR      | 1 |
| GDS1_HUMAN (P52306) Rap1 GTPase-GDP dissociation stimulator 1 (SMG P21 stimulatory GDP/GTP exchange protein) (SMG GDS protein) (Exchange factor smgGDS) [MASS=66403] | 0.98 | 3.46  | 1.19 | 0.00 | 1  | 1 | 2 | IQASGILQLFASLLTPQSSC[330]K                | 1 |
| GHC1_HUMAN (Q9H936) Mitochondrial glutamate carrier 1 (GC-1) (Glutamate/H(+)-symporter 1) (Solute carrier family 25 member 22) [MASS=34470]                          | 1.00 | 11.46 | 1.24 | 0.09 | 3  | 2 | 2 | LINGGIAGLIGVTC[339]VFPIDLAK               | 1 |
|                                                                                                                                                                      |      |       |      |      |    |   | 2 | GVNEDTYSGLDC[339]AR                       | 2 |
| GLRB_HUMAN (P48167) Glycine receptor beta chain precursor (Glycine receptor 58 kDa subunit) [MASS=56122]                                                             | *    | 3.42  | *    | *    | *  | 1 | 3 | GSDALTVDPTMYKC[330]LWK                    | 1 |
|                                                                                                                                                                      |      |       |      |      |    |   | 3 | GIHFC[330]HDLVSLC[330]NFHNYDNLR           | 1 |
|                                                                                                                                                                      |      |       |      |      |    |   | 2 | C[330]VQSNIVLLTQAFR                       | 1 |
|                                                                                                                                                                      |      |       |      |      |    |   | 3 | VPFC[339]LQSC[339]VKPLK                   | 1 |
|                                                                                                                                                                      |      |       |      |      |    |   | 3 | LKEC[339]MDM[147]LR                       | 1 |
|                                                                                                                                                                      |      |       |      |      |    |   | 2 | VPFC[339]LQSC[339]VKPLK                   | 5 |
|                                                                                                                                                                      |      |       |      |      |    |   | 2 | LKEC[339]MDM[147]LR                       | 2 |
| GLSK_HUMAN (O94925) Glutaminase kidney isoform, mitochondrial precursor (EC 3.5.1.2) (GLS) (L-glutamine amidohydrolase) (K-glutaminase) [MASS=73461]                 | 1.00 | 13.30 | 1.45 | 0.06 | 21 | 5 | 3 | FALSAM[147]DM[147]EQRDYDSRTALHVAEEGHVEVVK | 1 |
|                                                                                                                                                                      |      |       |      |      |    |   | 2 | LKEC[330]M[147]DM[147]LR                  | 3 |
|                                                                                                                                                                      |      |       |      |      |    |   | 2 | GIHFC[339]HDLVSLC[339]NFHNYDNLR           | 1 |
|                                                                                                                                                                      |      |       |      |      |    |   | 2 | LKEC[339]M[147]DM[147]LR                  | 2 |
|                                                                                                                                                                      |      |       |      |      |    |   | 2 | VPFC[330]LQSC[330]VKPLK                   | 4 |
|                                                                                                                                                                      |      |       |      |      |    |   | 3 | VPFC[330]LQSC[330]VKPLK                   | 1 |
|                                                                                                                                                                      |      |       |      |      |    |   | 3 | GIHFC[339]HDLVSLC[339]NFHNYDNLR           | 1 |

|                                                                                                                                                                                  |      |       |      |      |   |   |   |                                        |   |
|----------------------------------------------------------------------------------------------------------------------------------------------------------------------------------|------|-------|------|------|---|---|---|----------------------------------------|---|
| GLSL_HUMAN (Q9UI32) Glutaminase liver isoform, mitochondrial precursor (EC 3.5.1.2) (GLS) (L-glutamine amidohydrolase) (L-glutaminase) [MASS=66309]                              | 0.00 | 8.80  | 0.06 | 0.00 | 1 | 3 | 2 | EPGLRYNK                               | 2 |
|                                                                                                                                                                                  |      |       |      |      |   |   | 2 | M[147]DC[330]NKA EKFDVFLQYLNK          | 1 |
|                                                                                                                                                                                  |      |       |      |      |   |   | 2 | SAVSGAILLVV PNV MGM[147]MC[330]LSPPLDK | 1 |
| GMCLL_HUMAN (Q8NEA9) Germ cell-less protein-like 1-like [MASS=60201]                                                                                                             | *    | 5.13  | *    | *    | * | 1 | 2 | C[339]LEWLLNNLMTHQNVKLFKELGINVMK       | 1 |
| GNAI2_HUMAN (P04899) Guanine nucleotide-binding protein G(i), alpha-2 subunit (Adenylate cyclase-inhibiting G alpha protein) [MASS=40319]                                        | 0.99 | 3.67  | 1.08 | 0.00 | 1 | 1 | 2 | IIHEDGYSEEEEC[330]R                    | 1 |
| GNAO1_HUMAN (P09471) Guanine nucleotide-binding protein G(o) subunit alpha 1 [MASS=39919]                                                                                        | 1.00 | 11.05 | 0.58 | 0.16 | 5 | 2 | 2 | M[147]VC[330]DVVSR                     | 1 |
|                                                                                                                                                                                  |      |       |      |      |   |   | 2 | M[147]VC[339]DVVSR                     | 2 |
|                                                                                                                                                                                  |      |       |      |      |   |   | 3 | KSPLTIC[330]FPEYTGPN TYEDAAAYIQAQFESK  | 1 |
|                                                                                                                                                                                  |      |       |      |      |   |   | 2 | MVC[330]DVVSR                          | 1 |
| GNAS_HUMAN (P63092) Guanine nucleotide-binding protein G(s) subunit alpha (Adenylate cyclase-stimulating G alpha protein) [MASS=45664]                                           | *    | 3.30  | *    | *    | * | 1 | 2 | QADYVPSDQDLLR                          | 1 |
| GNAZ_HUMAN (P19086) Guanine nucleotide-binding protein G(z) subunit alpha (G(x) alpha chain) (Gz-alpha) [MASS=40792]                                                             | *    | 8.19  | *    | *    | * | 1 | 3 | AYDAVQLFALTGPAESKGEITPELLGV MR         | 1 |
| GNRP_HUMAN (Q13972) Guanine nucleotide-releasing protein (GNRP) (Ras-specific nucleotide exchange factor CDC25) (Ras-specific guanine nucleotide-releasing factor) [MASS=145382] | *    | 0.63  | *    | *    | * | 1 | 1 | TSSPSRRR                               | 1 |
|                                                                                                                                                                                  |      |       |      |      |   |   | 3 | QMSIHMEELKINISR                        | 1 |
|                                                                                                                                                                                  |      |       |      |      |   |   | 2 | LSALFSSSQKRIAELEEEELVC[330]VQK         | 1 |
|                                                                                                                                                                                  |      |       |      |      |   |   | 3 | M[147]KEQYLM AISDKDQQLSHLQNLIR         | 1 |
|                                                                                                                                                                                  |      |       |      |      |   |   | 3 | DDLEERLMNQLAELNGSIGNYC[330]QDVTDAQIK   | 1 |
|                                                                                                                                                                                  |      |       |      |      |   |   | 3 | TGQELQSAC[330]DALK                     | 1 |
|                                                                                                                                                                                  |      |       |      |      |   |   | 3 | EQASTE HQSRTSEEISLNDAGVELKSTK          | 1 |
|                                                                                                                                                                                  |      |       |      |      |   |   | 3 | ALHTQLEMQA KEHDER                      | 1 |
|                                                                                                                                                                                  |      |       |      |      |   |   | 2 | LKESE E ANEDLR                         | 1 |
| GGOB1_HUMAN (Q14789) Golgin subfamily B member 1 (Giantin) (Macro golgin) (372 kDa Golgi complex-associated protein) (GCP372) [MASS=376075]                                      | 0.00 | 5.00  | 1.04 | 0.00 | 1 | 8 | 3 | YDDV TLMGAEVASGGC[339]M[147]K          | 1 |
|                                                                                                                                                                                  |      |       |      |      |   |   | 2 | KVEIVVLETSASYC[330]PAERVANNR           | 1 |
|                                                                                                                                                                                  |      |       |      |      |   |   | 2 | ELVEVMVDMASNLMLVDEHLLWLAQR             | 1 |
|                                                                                                                                                                                  |      |       |      |      |   |   | 2 | YDDV TLMGAEVASGGC[339]M[147]K          | 1 |
| GP124_HUMAN (Q96PE1) Probable G-protein coupled receptor 124 precursor (Tumor endothelial marker 5) [MASS=141961]                                                                | 0.00 | 5.03  | 2.04 | 0.00 | 1 | 3 |   |                                        |   |

|                                                                                                                                                                           |      |       |      |      |   |   |   |                                     |   |
|---------------------------------------------------------------------------------------------------------------------------------------------------------------------------|------|-------|------|------|---|---|---|-------------------------------------|---|
| GPDM_HUMAN (P43304) Glycerol-3-phosphate dehydrogenase, mitochondrial precursor (EC 1.1.99.5) (GPD-M) (GPDH-M) (mtGPD) [MASS=80833]                                       | 1.00 | 5.78  | 1.27 | 0.05 | 2 | 3 | 2 | C[339]KDVLTGQEFDVR                  | 1 |
|                                                                                                                                                                           |      |       |      |      |   |   | 2 | FHKFDADQKGFITIVDVQR                 | 1 |
|                                                                                                                                                                           |      |       |      |      |   |   | 2 | NYLSC[339]DVEVR                     | 1 |
| GPM6A_HUMAN (P51674) Neuronal membrane glycoprotein M6-a (M6a) [MASS=31209]                                                                                               | 0.40 | 3.96  | 0.98 | 0.00 | 1 | 1 | 2 | KIC[339]TVSENFLR                    | 1 |
| GPM6B_HUMAN (Q13491) Neuronal membrane glycoprotein M6-b (M6b) [MASS=28989]                                                                                               | 0.58 | 10.57 | 0.45 | 0.00 | 1 | 2 | 2 | M[147]KPAM[147]ETAAEENTEQSQER       | 1 |
|                                                                                                                                                                           |      |       |      |      |   |   | 2 | SREDC[330]C[330]TKF                 | 1 |
|                                                                                                                                                                           |      |       |      |      |   |   | 3 | C[339]QGPPGVLDYRLEK                 | 6 |
| GPVI_HUMAN (Q9HCN6) Platelet glycoprotein VI precursor [MASS=36923]                                                                                                       | 0.00 | 20.06 | 3.04 | 0.02 | 3 | 3 |   |                                     |   |
|                                                                                                                                                                           |      |       |      |      |   |   | 3 | LPTEPPSSVAEFSEATAELTVSFTNKVFTTETSR  | 1 |
|                                                                                                                                                                           |      |       |      |      |   |   | 2 | WYRASFPITVTAHSGTYR                  | 1 |
| GRIA4_HUMAN (P48058) Glutamate receptor 4 precursor (GluR-4) (GluR4) (GluR-D) (Glutamate receptor ionotropic, AMPA 4) (AMPA-selective glutamate receptor 4) [MASS=100809] | 0.00 | 7.21  | 0.97 | 0.00 | 1 | 3 | 2 | KFVIDC[339]EIERLQNIQIVSVGK          | 1 |
|                                                                                                                                                                           |      |       |      |      |   |   | 3 | LSITGSGVGENGRVLPDC[339]PK           | 1 |
|                                                                                                                                                                           |      |       |      |      |   |   | 2 | AGQNGWHVSAIC[330]VENFNDVSYR         | 1 |
| GRIK4_HUMAN (Q16099) Glutamate receptor, ionotropic kainate 4 precursor (Glutamate receptor KA-1) (KA1) (Excitatory amino acid receptor 1) (EAA1) [MASS=107229]           | *    | 6.59  | *    | *    | * | 3 | 3 | MDVPIESVDDLADQTAIEYGTIHGGSSMTFFQNSR | 1 |
|                                                                                                                                                                           |      |       |      |      |   |   | 2 | DTLSVRM[147]LDDTR                   | 1 |
|                                                                                                                                                                           |      |       |      |      |   |   | 2 | MLDDTRDPTPLLKEIR                    | 1 |
| GRIK5_HUMAN (Q16478) Glutamate receptor, ionotropic kainate 5 precursor (Glutamate receptor KA-2) (KA2) (Excitatory amino acid receptor 2) (EAA2) [MASS=109047]           | 0.00 | 6.43  | 1.72 | 0.00 | 1 | 3 | 2 | DSQYETDTM[147]C[339]QILPK           | 1 |
|                                                                                                                                                                           |      |       |      |      |   |   | 3 | SFNYPASALIC[339]AKAEC[330]LLR       | 1 |
|                                                                                                                                                                           |      |       |      |      |   |   | 2 | LRLVEDGLYGAPEPNGSWTGMVVELINR        | 1 |
| GRIP2_HUMAN (Q9C0E4) Glutamate receptor-interacting protein 2 (GRIP2 protein) [MASS=112501]                                                                               | 0.00 | 3.55  | 4.28 | 0.00 | 1 | 2 | 2 | VVLEVEFDVAESVIPSSGTFHVK             | 1 |
|                                                                                                                                                                           |      |       |      |      |   |   | 2 | LDNC[339]PMEDAVQILR                 | 1 |
| GRIPE_HUMAN (Q6GYQ0) GTPase-activating Rap/Ran-GAP domain-like 1 (GAP-related-interacting partner to E12) (GRIPE) (Tuberin-like protein 1) [MASS=229830]                  | 0.00 | 4.17  | 0.86 | 0.00 | 1 | 4 | 3 | TVAHVAC[330]NMLHMLVHYVPRLQIYQPDSPLK | 1 |
|                                                                                                                                                                           |      |       |      |      |   |   | 2 | RGIIPTFEFGDVLIVIPM[147]K            | 1 |
|                                                                                                                                                                           |      |       |      |      |   |   | 2 | RILNIYRYMVVQVSMKD                   | 1 |
|                                                                                                                                                                           |      |       |      |      |   |   | 2 | TVAHVAC[330]NMLHMLVHYVPR            | 1 |

|                                                                                                                                                                                              |      |       |      |      |   |   |   |                                                                                                                                    |                  |
|----------------------------------------------------------------------------------------------------------------------------------------------------------------------------------------------|------|-------|------|------|---|---|---|------------------------------------------------------------------------------------------------------------------------------------|------------------|
| GRLF1_HUMAN (Q9NRY4) Glucocorticoid receptor DNA-binding factor 1 (Glucocorticoid receptor repression factor 1) (GRF-1) (Rho GAP p190A) (p190-A) [MASS=172228]                               | 0.00 | 5.22  | 1.21 | 0.00 | 1 | 3 | 3 | LYLAALPLAFEALIPNLDEIDHLSC[330]IK<br>DHSKLSM[147]ELEGNDGLSFIMSNFESK<br>SVSSSPWLPQDGFDPDSDYAEPMDAVVK                                 | 1<br>1<br>1      |
| GRP75_HUMAN (P38646) Stress-70 protein, mitochondrial precursor (75 kDa glucose-regulated protein) (GRP 75) (Peptide-binding protein 74) (PBP74) (Mortalin) (MOT) [MASS=73680]               | 1.00 | 7.95  | 0.22 | 3.34 | 2 | 3 | 2 | RTIAPC[330]QK<br>M[147]EEFKDQLPADEC[339]NK<br>AKC[330]ELSSSVQTDINLPYLTMDSGPKHLNM[147]K                                             | 1<br>1<br>1      |
| GUC1A_HUMAN (P43080) Guanylyl cyclase-activating protein 1 (GCAP 1) (Guanylate cyclase activator 1A) [MASS=22788]                                                                            | *    | 11.00 | *    | *    | * | 1 | 3 | FM[147]TEC[339]PSGQLTLYEFRQFFGLK                                                                                                   | 1                |
| GUC2D_HUMAN (Q02846) Retinal guanylyl cyclase 1 precursor (EC 4.6.1.2) (Guanylate cyclase 2D, retinal) (RETGC-1) (Rod outer segment membrane guanylate cyclase) (ROSGC) [MASS=120058]        | 0.00 | 8.70  | 0.41 | 0.00 | 1 | 4 | 3 | HIRDAQVPGFC[330]GDLGGDEEPPFVLLDTDAAGDR<br>HAAEIANMSLDILSAVGTFRMR<br>DPALERRGTLAGDVFSLAIIIM[147]QEVVC[330]R<br>VSGLVGPVNPAAAC[330]R | 1<br>1<br>1<br>1 |
| H2AW_HUMAN (Q9P0M6) Core histone macro-H2A.2 (Histone macroH2A2) (mH2A2) [MASS=39927]                                                                                                        | 0.00 | 3.23  | 0.39 | 0.00 | 1 | 1 | 2 | NC[330]LSAAEDKCLK                                                                                                                  | 1                |
| HAIIP_HUMAN (O60229) Huntingtin-associated protein-interacting protein (Protein Duo) [MASS=192228]                                                                                           | 0.00 | 1.08  | 1.33 | 0.00 | 1 | 1 | 2 | LKLDQC[339]FQLRLEQDAEK                                                                                                             | 1                |
| HBB_HUMAN (P68871) Hemoglobin subunit beta (Hemoglobin beta chain) (Beta-globin) [MASS=15867]                                                                                                | 1.00 | 15.07 | 0.83 | 0.05 | 4 | 1 | 3 | GTFATLSELHC[339]DKLHVDPENFR<br>GTFATLSELHC[330]DKLHVDPENFR                                                                         | 1<br>3           |
| HCDH_HUMAN (Q16836) Short chain 3-hydroxyacyl-CoA dehydrogenase, mitochondrial precursor (EC 1.1.1.35) (HCDH) (Medium and short chain L-3-hydroxyacyl-coenzyme A dehydrogenase) [MASS=34277] | *    | 4.78  | *    | *    | * | 1 | 2 | LLVPYLMEAIRLYER                                                                                                                    | 1                |

|                                                                                                                                                                                                                                                                             |      |       |      |      |   |   |   |                                           |   |
|-----------------------------------------------------------------------------------------------------------------------------------------------------------------------------------------------------------------------------------------------------------------------------|------|-------|------|------|---|---|---|-------------------------------------------|---|
| HCFC1_HUMAN (P51610) Host cell factor (HCF) (HCF-1) (C1 factor) (VP16 accessory protein) (VCAF) (CFF) [Contains: HCF N-terminal chain 1; HCF N-terminal chain 2; HCF N-terminal chain 3; HCF N-terminal chain 4; HCF N-terminal chain 5; HCF N-terminal chain [MASS=208840] | *    | 3.73  | *    | *    | * | 3 | 2 | APMKKENQWFDVGVIK                          | 1 |
|                                                                                                                                                                                                                                                                             |      |       |      |      |   |   | 2 | VQLVRANTNSLEVSWGAVATADSYLLQLQK            | 1 |
|                                                                                                                                                                                                                                                                             |      |       |      |      |   |   | 3 | TMAVTPGTTTTLPATVKVASSPVM[147]VSNPATR      | 1 |
| HCN4_HUMAN (Q9Y3Q4) Potassium/sodium hyperpolarization-activated cyclic nucleotide-gated channel 4 [MASS=129041]                                                                                                                                                            | *    | 4.32  | *    | *    | * | 2 | 3 | RASPHSSGESM[147]AAFPLFPRAGGGSGGSSGGLGPPGR | 1 |
|                                                                                                                                                                                                                                                                             |      |       |      |      |   |   | 2 | PYGAIPGQHVTLPR                            | 1 |
| HDA10_HUMAN (Q969S8) Histone deacetylase 10 (HD10) [MASS=71444]                                                                                                                                                                                                             | *    | 4.63  | *    | *    | * | 1 | 3 | LSAREASEEELGLVHSPEYVSLVRETQVLGK           | 1 |
|                                                                                                                                                                                                                                                                             |      |       |      |      |   |   | 3 | LPLVNSYTRVPPLVWKLGWSPK                    | 1 |
|                                                                                                                                                                                                                                                                             |      |       |      |      |   |   | 2 | DGDSTSTLEEHSSEKQIKNLPEETFSSR              | 1 |
| HD_HUMAN (P42858) Huntingtin (Huntington disease protein) (HD protein) [MASS=347857]                                                                                                                                                                                        | 0.00 | 3.24  | 2.45 | 0.00 | 1 | 5 | 2 | AENLHRGAHHYTGLLK                          | 1 |
|                                                                                                                                                                                                                                                                             |      |       |      |      |   |   | 2 | WWAEVQQTPKRHLSSTK                         | 1 |
|                                                                                                                                                                                                                                                                             |      |       |      |      |   |   | 2 | NSSMALQQAHLKKNM[147]SHC[339]R             | 1 |
| HEAT3_HUMAN (Q7Z4Q2) HEAT repeat-containing protein 3 [MASS=74582]                                                                                                                                                                                                          | 0.00 | 8.24  | 1.45 | 0.00 | 1 | 2 | 2 | DIMTPLVALLKEC[339]SAGLDSNEMSLQEK          | 1 |
|                                                                                                                                                                                                                                                                             |      |       |      |      |   |   | 2 | SQAEIINALLKILSEVLGM[147]DAGEM[147]VIQMK   | 1 |
|                                                                                                                                                                                                                                                                             |      |       |      |      |   |   | 3 | GILEPHGGRSDMDR                            | 3 |
| HEPH_HUMAN (Q9BQS7) Hephaestin precursor (EC 1.-.-.-) [MASS=130448]                                                                                                                                                                                                         | *    | 1.21  | *    | *    | * | 1 |   |                                           |   |
| HEPS_HUMAN (P05981) Serine protease hepsin (EC 3.4.21.-) (Transmembrane protease, serine 1) [Contains: Serine protease hepsin non-catalytic chain; Serine protease hepsin catalytic chain] [MASS=45011]                                                                     | 0.00 | 2.88  | 1.83 | 0.00 | 1 | 1 | 2 | FLAaic[339]QDC[339]GRR                    | 1 |
| HESX1_HUMAN (Q9UBX0) Homeobox expressed in ES cells 1 (Homeobox protein ANF) (hAnf) [MASS=21409]                                                                                                                                                                            | 0.00 | 17.30 | 1.36 | 0.00 | 1 | 1 | 3 | DGNLC[339]LHVPNPPSGISFSPVVDHPMPEERASK     | 1 |
| HHCM_HUMAN (Q05877) Hepatocellular carcinoma protein HHCM (HHC(M)) [MASS=52150]                                                                                                                                                                                             | *    | 6.42  | *    | *    | * | 1 | 2 | VGIINIFKVIISILQQVMANTLEINGKIR             | 1 |
| HINT2_HUMAN (Q9BX68) Histidine triad nucleotide-binding protein 2 (EC 3.-.-.-) (HINT-2) (HINT-3) (HIT-17kDa) (PKCI-1-related HIT protein) [MASS=17162]                                                                                                                      | *    | 12.27 | *    | *    | * | 1 | 2 | DVAPQAPVHFLVIPKKPIPR                      | 1 |

|                                                                                                                                             |      |       |      |      |   |   |                            |                                                                                                                                                                                       |                            |
|---------------------------------------------------------------------------------------------------------------------------------------------|------|-------|------|------|---|---|----------------------------|---------------------------------------------------------------------------------------------------------------------------------------------------------------------------------------|----------------------------|
| HIP1R_HUMAN (O75146) Huntingtin-interacting protein 1-related protein (Hip1-related) (Hip 12) [MASS=119387]                                 | 0.00 | 7.12  | 2.30 | 0.00 | 1 | 4 | 3<br>2<br>2<br>3           | ALELM[147]GQLQDQQALR<br>LQEC[330]SRTVNERAANVVASTK<br>RIEDM[147]M[147]NQARHASSGVK<br>LSESVFRQLNTAIAVSMSSGQC[339]R                                                                      | 1<br>1<br>1<br>1           |
| HNRH1_HUMAN (P31943) Heterogeneous nuclear ribonucleoprotein H (hnRNP H) [MASS=49098]                                                       | *    | 4.46  | *    | *    | * | 1 | 2                          | FFSDC[330]KIQNGAQQGIRFIYTR                                                                                                                                                            | 1                          |
| HNRLH_HUMAN (Q8WVV9) Heterogeneous nuclear ribonucleoprotein L-like (Stromal RNA-regulating factor) (BLOCK24 protein) [MASS=60083]          | *    | 6.46  | *    | *    | * | 2 | 3<br>2                     | AVTHLNNVKLFGK<br>TEEGEIDYSAEEGENRREATPR                                                                                                                                               | 1<br>1                     |
| HNRPK_HUMAN (P61978) Heterogeneous nuclear ribonucleoprotein K (hnRNP K) (Transformation up-regulated nuclear protein) (TUNP) [MASS=50976]  | 0.99 | 6.26  | 0.75 | 0.00 | 1 | 2 | 2<br>2                     | LFQEC[330]C[330]PHSTDR<br>GGSRRARNLPLPPPPPPR                                                                                                                                          | 1<br>1                     |
| HNRPU_HUMAN (Q00839) Heterogeneous nuclear ribonucleoprotein U (hnRNP U) (Scaffold attachment factor A) (SAF-A) (p120) (pp120) [MASS=90348] | 0.00 | 15.67 | 0.33 | 0.00 | 1 | 6 | 2<br>2<br>3<br>3<br>3<br>3 | KDC[339]EVVM[147]MIGLPGAGKTTWVTK<br>KQM[147]ADTGKLNLLQR<br>RGNM[147]PQRGGGGGGSGGIGYPYPR<br>EVLAGRPLFPVLC[330]HNC[330]AVEFNFGQK<br>GGM[147]PNRGNYNQNFGR<br>IGWSLTTSGMILLGEEEFSGYSLKGIK | 1<br>1<br>1<br>1<br>1<br>1 |
| HOK2_HUMAN (Q96ED9) Hook homolog 2 (h-hook2) (hHK2) [MASS=83163]                                                                            | 0.00 | 0.97  | 0.16 | 0.00 | 1 | 1 | 2                          | C[330]AQLQPR                                                                                                                                                                          | 1                          |
| HS105_HUMAN (Q92598) Heat-shock protein 105 kDa (Heat shock 110 kDa protein) (Antigen NY-CO-25) [MASS=96864]                                | *    | 3.38  | *    | *    | * | 1 | 3                          | VPTEENEMSSEADMEC[339]LNQRPPENPDTDK                                                                                                                                                    | 1                          |
| HS12A_HUMAN (O43301) Heat shock 70 kDa protein 12A [MASS=74978]                                                                             | *    | 3.70  | *    | *    | * | 2 | 1<br>2                     | RAAAPDR<br>WVITVPAIWKQPAKQFM[147]R                                                                                                                                                    | 1<br>1                     |
| HS12B_HUMAN (Q96MM6) Heat shock 70 kDa protein 12B [MASS=75687]                                                                             | *    | 3.21  | *    | *    | * | 1 | 3                          | TQLEAVNGKTM[147]PALEVFAHALR                                                                                                                                                           | 1                          |
| HS74L_HUMAN (O95757) Heat shock 70 kDa protein 4L (Osmotic stress protein 94) (Heat shock 70-related protein APG-1) [MASS=94486]            | 0.00 | 1.91  | 0.97 | 0.00 | 1 | 1 | 2                          | GKVKSIDLPIQSSLC[339]R                                                                                                                                                                 | 1                          |
| HS90A_HUMAN (P07900) Heat shock protein HSP 90-alpha (HSP 86) (NY-REN-38 antigen) [MASS=84528]                                              | *    | 6.02  | *    | *    | * | 3 | 2<br>3<br>2                | YYTSASGDEM[147]VSLKDYC[330]TRM[147]K<br>ADLNNLGTIAK<br>KFYEQFSKNIK                                                                                                                    | 1<br>1<br>1                |
| HS90B_HUMAN (P08238) Heat shock protein HSP 90-beta (HSP 84) (HSP 90) [MASS=83132]                                                          | 0.00 | 3.87  | 0.68 | 0.00 | 1 | 2 | 2<br>2                     | GFEVYMTPEIDEYC[339]VQQLK<br>AKFENLC[330]K                                                                                                                                             | 1<br>1                     |



|                                                                                                                |      |       |      |      |    |    |   |                                              |   |
|----------------------------------------------------------------------------------------------------------------|------|-------|------|------|----|----|---|----------------------------------------------|---|
| HUTH_HUMAN (P42357) Histidine ammonia-lyase (EC 4.3.1.3) (Histidase) [MASS=72697]                              | 0.00 | 1.83  | 0.50 | 0.00 | 1  | 1  | 2 | C[330]KGLGLLDNEDR                            | 1 |
| HV3P_HUMAN (P01777) Ig heavy chain V-III region TEI [MASS=12802]                                               | 0.00 | 18.49 | 0.49 | 0.00 | 1  | 1  | 2 | NTRYLQMLSLEPZBTAVYYC[339]JAR                 | 1 |
| HXA13_HUMAN (P31271) Homeobox protein Hox-A13 (Hox-1J) [MASS=39753]                                            | 0.00 | 8.76  | 0.77 | 0.00 | 1  | 1  | 3 | SC[330]PQPPSAAAAAAFADKYM[147]DTAGPAAEEFSSRAK | 1 |
|                                                                                                                |      |       |      |      |    |    | 2 | AAQLC[330]GAGM[147]AAVVDK                    | 2 |
|                                                                                                                |      |       |      |      |    |    | 2 | AAQLC[339]GAGM[147]AAVVDKIR                  | 3 |
|                                                                                                                |      |       |      |      |    |    | 3 | LGVEPSDDDC[330]VSVQHVC[330]TIVSFR            | 1 |
|                                                                                                                |      |       |      |      |    |    | 2 | C[339]NVSFLLSEDGSGK                          | 2 |
|                                                                                                                |      |       |      |      |    |    | 2 | MIAAQLLAYYFTELKDDQVK                         | 1 |
|                                                                                                                |      |       |      |      |    |    | 2 | LPVGFTFSFPC[330]QQSK                         | 1 |
|                                                                                                                |      |       |      |      |    |    | 3 | LGVEPSDDDC[339]VSVQHVC[339]TIVSFR            | 1 |
|                                                                                                                |      |       |      |      |    |    | 2 | AILQQLGLNSTC[339]DDSILVK                     | 1 |
| HXK1_HUMAN (P19367) Hexokinase-1 (EC 2.7.1.1) (Hexokinase type I) (HK I) (Brain form hexokinase) [MASS=102484] | 1.00 | 23.12 | 1.40 | 0.06 | 28 | 13 | 2 | MISGM[147]YLGEIVRNILIDFTKK                   | 1 |
|                                                                                                                |      |       |      |      |    |    | 2 | ATDC[339]VGHDVVTLLR                          | 3 |
|                                                                                                                |      |       |      |      |    |    | 2 | RAAQLC[339]GAGM[147]AAVVDK                   | 2 |
|                                                                                                                |      |       |      |      |    |    | 2 | AAQLC[339]GAGM[147]AAVVDK                    | 2 |
|                                                                                                                |      |       |      |      |    |    | 2 | KLPVGFTFSFPC[339]QQSK                        | 3 |
|                                                                                                                |      |       |      |      |    |    | 2 | C[330]NVSFLLSEDGSGK                          | 1 |
|                                                                                                                |      |       |      |      |    |    | 2 | ATDC[330]VGHDVVTLLR                          | 1 |
|                                                                                                                |      |       |      |      |    |    | 1 | TVC[339]GVVSR                                | 1 |
|                                                                                                                |      |       |      |      |    |    | 3 | NILIDFTKKGFLFR                               | 1 |
|                                                                                                                |      |       |      |      |    |    | 2 | LPVGFTFSFPC[339]QQSK                         | 4 |
| HXK1_HUMAN (P19367) Hexokinase-1 (EC 2.7.1.1) (Hexokinase type I) (HK I) (Brain form hexokinase) [MASS=102484] | 1.00 | 23.12 | 1.40 | 0.06 | 28 | 13 | 2 | TVC[330]GVVSR                                | 1 |

|                                                                                                                                                                                                                                                                             |      |       |      |      |   |   |   |                                         |   |
|-----------------------------------------------------------------------------------------------------------------------------------------------------------------------------------------------------------------------------------------------------------------------------|------|-------|------|------|---|---|---|-----------------------------------------|---|
| I12R2_HUMAN (Q99665) Interleukin-12 receptor beta-2 chain precursor (IL-12 receptor beta-2) (IL-12R-beta2) [MASS=97135]                                                                                                                                                     | *    | 3.36  | *    | *    | * | 1 | 3 | SYIC[330]YEIRVYALSGDQGGC[330]SSILGNSKHK | 1 |
| I28RA_HUMAN (Q8IU57) Interleukin-28 receptor alpha chain precursor (IL-28R-alpha) (IL-28RA) (Cytokine receptor family 2 member 12) (Cytokine receptor class-II member 12) (CRF2-12) (Interferon lambda receptor 1) (IFN-lambda R1) (Likely interleukin or cyto [MASS=57652] | 0.00 | 3.85  | 1.62 | 0.00 | 1 | 1 | 2 | EVEEC[339]AGTKELLC[339]SMMC[339]LKK     | 1 |
| I2C1_HUMAN (Q9UL18) Eukaryotic translation initiation factor 2C 1 (eIF2C 1) (eIF-2C 1) (Argonaute-1) (Putative RNA-binding protein Q99) [MASS=97214]                                                                                                                        | *    | 3.27  | *    | *    | * | 1 | 3 | PASHQTFPLQLESGQTVVEC[339]TVAQYFKQK      | 1 |
| I2C3_HUMAN (Q9H9G7) Eukaryotic translation initiation factor 2C 3 (eIF2C 3) (eIF-2C 3) (Argonaute-3) [MASS=97360]                                                                                                                                                           | *    | 5.12  | *    | *    | * | 2 | 2 | DEM[147]AHVTGRVLPAPM[147]LQYGGR         | 1 |
|                                                                                                                                                                                                                                                                             |      |       |      |      |   |   | 3 | QFHTGVEIKM[147]WAIAC[330]FATQRQC[339]R  | 1 |
| I2C4_HUMAN (Q9HCK5) Eukaryotic translation initiation factor 2C 4 (eIF2C 4) (eIF-2C 4) (Argonaute-4) [MASS=97096]                                                                                                                                                           | *    | 1.86  | *    | *    | * | 2 | 3 | KAC[339]ISLEEDYR                        | 2 |
|                                                                                                                                                                                                                                                                             |      |       |      |      |   |   | 1 | IIYYR                                   | 2 |
| ICAM5_HUMAN (Q9UMF0) Intercellular adhesion molecule 5 precursor (ICAM-5) (Telencephalin) [MASS=97330]                                                                                                                                                                      | *    | 2.16  | *    | *    | * | 1 | 2 | VAFVERGGSLWLNC[330]STNC[330]PR          | 1 |
| IDH3A_HUMAN (P50213) Isocitrate dehydrogenase [NAD] subunit alpha, mitochondrial precursor (EC 1.1.1.41) (Isocitric dehydrogenase) (NAD(+)-specific ICDH) [MASS=39591]                                                                                                      | 0.27 | 13.93 | 1.31 | 0.00 | 1 | 2 | 2 | TFDLYANVRPC[339]VSIEGYK                 | 1 |
|                                                                                                                                                                                                                                                                             |      |       |      |      |   |   | 3 | GFTGGVQTVTLIPGDGIGPEISAAVM[147]KIFDAAK  | 1 |
| IDH3G_HUMAN (P51553) Isocitrate dehydrogenase [NAD] subunit gamma, mitochondrial precursor (EC 1.1.1.41) (Isocitric dehydrogenase) (NAD(+)-specific ICDH) [MASS=42794]                                                                                                      | 0.99 | 7.12  | 1.53 | 0.00 | 1 | 2 | 1 | KKVTAVHK                                | 2 |
|                                                                                                                                                                                                                                                                             |      |       |      |      |   |   | 2 | NIANPTATLLASC[339]M[147]M[147]LDHLK     | 1 |

|                                                                                                                                                                                                                                           |      |       |      |      |   |   |   |                                               |   |
|-------------------------------------------------------------------------------------------------------------------------------------------------------------------------------------------------------------------------------------------|------|-------|------|------|---|---|---|-----------------------------------------------|---|
| IDHP_HUMAN (P48735) Isocitrate dehydrogenase [NADP], mitochondrial precursor (EC 1.1.1.42) (Oxalosuccinate decarboxylase) (IDH) (NADP(+)-specific ICDH) (IDP) (ICD-M) [MASS=50909]                                                        | 1.00 | 11.28 | 1.36 | 0.15 | 8 | 4 | 2 | NILGGTVFREPIIC[339]K                          | 1 |
|                                                                                                                                                                                                                                           |      |       |      |      |   |   | 2 | VC[330]VETVESGAM[147]TK                       | 1 |
|                                                                                                                                                                                                                                           |      |       |      |      |   |   | 2 | DLAGC[339]IHGLSNVK                            | 2 |
| IF4G2_HUMAN (P78344) Eukaryotic translation initiation factor 4 gamma 2 (eIF-4-gamma 2) (eIF-4G 2) (eIF4G 2) (p97) (Death-associated protein 5) (DAP-5) [MASS=102361]                                                                     | *    | 2.98  | *    | *    | * | 2 | 3 | AKSLMDQYFARM[147]C[339]SLM[147]LSK            | 1 |
|                                                                                                                                                                                                                                           |      |       |      |      |   |   | 2 | ERHDAIFR                                      | 1 |
|                                                                                                                                                                                                                                           |      |       |      |      |   |   |   |                                               |   |
| IF5A1_HUMAN (P63241) Eukaryotic translation initiation factor 5A-1 (eIF-5A-1) (eIF-5A1) (Eukaryotic initiation factor 5A isoform 1) (eIF-5A) (eIF-4D) (Rev-binding factor) [MASS=16701]                                                   | *    | 27.45 | *    | *    | * | 2 | 3 | YDC[339]GEEILITVLSAM[147]TEEA AVAIK           | 1 |
|                                                                                                                                                                                                                                           |      |       |      |      |   |   | 2 | HGHAKVHLVGIDIFTGKK                            | 1 |
| IF5A2_HUMAN (Q9GZV4) Eukaryotic translation initiation factor 5A-2 (eIF-5A-2) (eIF-5A2) (Eukaryotic initiation factor 5A isoform 2) [MASS=16662]                                                                                          | *    | 19.08 | *    | *    | * | 1 | 3 | EIEGKYNAGEDVQVSVM[147]C[330]AM[147]SEEY AVAIK | 1 |
| IGLL1_HUMAN (P15814) Immunoglobulin lambda-like polypeptide 1 precursor (Immunoglobulin-related protein 14.1) (Immunoglobulin omega polypeptide) (Ig lambda-5) (CD179b antigen) [MASS=22963]                                              | 0.00 | 17.37 | 1.83 | 0.00 | 1 | 2 | 2 | SYSC[339]QVM[147]HEGSTVEK                     | 1 |
|                                                                                                                                                                                                                                           |      |       |      |      |   |   | 2 | QSNKYAASSYLSLTPEQWRSR                         | 1 |
| IGS4B_HUMAN (Q8N126) Immunoglobulin superfamily member 4B precursor (Nectin-like protein 1) (TSLC1-like protein 1) (Synaptic cell adhesion molecule 3) (Brain immunoglobulin receptor) [MASS=43300]                                       | 1.00 | 11.06 | 0.69 | 0.18 | 3 | 3 | 2 | EDDGASIVC[330]SVNHESLK                        | 1 |
|                                                                                                                                                                                                                                           |      |       |      |      |   |   | 2 | LLLHC[330]EGR                                 | 1 |
|                                                                                                                                                                                                                                           |      |       |      |      |   |   | 3 | EKDTATLNC[330]QSSGSKPAAR                      | 1 |
| IGSF8_HUMAN (Q969P0) Immunoglobulin superfamily member 8 precursor (CD81 partner 3) (Glu-Trp-Ile EWI motif-containing protein 2) (EWI-2) (Keratinocytes-associated transmembrane protein 4) (KCT-4) (LIR-D1) (CD316 antigen) [MASS=65034] | *    | 4.73  | *    | *    | * | 1 | 2 | QAPTSPRMTVHEGQELALGC[330]LARTSTQK             | 1 |

|                                                                                                                                                                                  |      |      |      |      |   |   |   |                                     |    |
|----------------------------------------------------------------------------------------------------------------------------------------------------------------------------------|------|------|------|------|---|---|---|-------------------------------------|----|
| IL18R_HUMAN (Q13478) Interleukin-18 receptor 1 precursor (IL1 receptor-related protein) (IL-1Rrp) (CDw218a antigen) [MASS=62304]                                                 | 0.00 | 9.98 | 1.08 | 0.00 | 1 | 3 | 2 | VLEKHFQYKLC[339]IFER                | 1  |
|                                                                                                                                                                                  |      |      |      |      |   |   | 3 | MNC[339]RELPLTLWVLISVSTAESC[330]TSR | 1  |
|                                                                                                                                                                                  |      |      |      |      |   |   | 2 | KADM[147]ADIPGHVFTR                 | 1  |
| IL18_HUMAN (Q14116) Interleukin-18 precursor (IL-18) (Interferon-gamma-inducing factor) (IFN-gamma-inducing factor) (Interleukin-1 gamma) (IL-1 gamma) (Ibocadakin) [MASS=22326] | 0.00 | 8.81 | 0.37 | 0.00 | 1 | 1 | 3 | M[147]AAEPVEDNC[330]INFVAMK         | 1  |
|                                                                                                                                                                                  |      |      |      |      |   |   | 3 | KWKSSFQHHHLR                        | 12 |
| IL1F8_HUMAN (Q9NZH7) Interleukin-1 family member 8 (IL-1F8) (Interleukin-1 eta) (IL-1 eta) (FIL1 eta) (Interleukin-1 homolog 2) (IL-1H2) [MASS=18521]                            | *    | 7.32 | *    | *    | * | 1 |   |                                     |    |
| IMMT_HUMAN (Q16891) Mitochondrial inner membrane protein (Mitofilin) (p87/89) (Proliferation-inducing gene 4 protein) [MASS=83677]                                               | *    | 3.03 | *    | *    | * | 1 | 2 | YSMTSSAETPTIPLGSAVEAIK              | 2  |
| INADL_HUMAN (Q8NI35) InaD-like protein (Inadl protein) (hINADL) (Pals1-associated tight junction protein) (Protein associated to tight junctions) [MASS=196385]                  | 0.00 | 2.55 | 1.81 | 0.00 | 1 | 2 | 2 | TETSLPETEVDHNMVDNTEEDDDGELALWSPEVK  | 1  |
|                                                                                                                                                                                  |      |      |      |      |   |   | 2 | NC[330]GNSVRMLVAR                   | 2  |
| INSR_HUMAN (P06213) Insulin receptor precursor (EC 2.7.10.1) (IR) (CD220 antigen) [Contains: Insulin receptor subunit alpha; Insulin receptor subunit beta] [MASS=156306]        | 0.00 | 0.72 | 0.07 | 0.00 | 1 | 1 | 2 | KHFALERGC[330]R                     | 1  |
| INT10_HUMAN (Q9NVR2) Integrator complex subunit 10 (Int10) [MASS=82235]                                                                                                          | 0.00 | 5.63 | 0.57 | 0.00 | 1 | 2 | 2 | LRAFTDNRDDM[147]ALGHVIVLLQQEWPR     | 1  |
|                                                                                                                                                                                  |      |      |      |      |   |   | 2 | SYGDILHRMKDLC[339]R                 | 1  |
| INVS_HUMAN (Q9Y283) Inversin (Inversion of embryo turning homolog) (Nephrocystin-2) [MASS=117826]                                                                                | *    | 2.91 | *    | *    | * | 2 | 2 | LDC[339]ADALLKAGADVNKTDHSQR         | 1  |
|                                                                                                                                                                                  |      |      |      |      |   |   | 1 | GTSGTKSTK                           | 1  |

|                                                                                                                                                                                                                        |                            |       |      |      |   |   |   |                                          |   |
|------------------------------------------------------------------------------------------------------------------------------------------------------------------------------------------------------------------------|----------------------------|-------|------|------|---|---|---|------------------------------------------|---|
| IP6K1_HUMAN (Q92551) Inositol hexaphosphate kinase 1 (EC 2.7.4.21) (InsP6 kinase 1) (Inositol hexakisphosphate kinase 1) [MASS=50235]                                                                                  | *                          | 2.95  | *    | *    | * | 1 | 2 | KC[330]EQSTSATLGVR                       | 1 |
| IPO7_HUMAN (O95373) Importin-7 (Imp7) (Ran-binding protein 7) (RanBP7) [MASS=119516]                                                                                                                                   | *                          | 1.06  | *    | *    | * | 1 | 2 | C[339]LIDDEREM[147]PVK                   | 1 |
| IQGA2_HUMAN (Q13576) Ras GTPase-activating-like protein IQGAP2 [MASS=180480]                                                                                                                                           | *                          | 7.31  | *    | *    | * | 5 | 2 | PVIYISIEEIISTHSLLEHQDAIAPEK              | 1 |
|                                                                                                                                                                                                                        |                            |       |      |      |   |   | 2 | GGEMEILNNTDNQGIKSLSK                     | 1 |
|                                                                                                                                                                                                                        |                            |       |      |      |   |   | 3 | SKFLGVEMEKVQLNIQDLLQM[147]QYEGVAVM[147]K | 1 |
|                                                                                                                                                                                                                        |                            |       |      |      |   |   | 2 | PRYGSI VDDERLSAEEMDER                    | 1 |
|                                                                                                                                                                                                                        |                            |       |      |      |   |   | 2 | QWVTLVVDVNQC[330]LEGKK                   | 1 |
| 2                                                                                                                                                                                                                      | PRYGSI VDDERLSAEEM[147]DER | 1     |      |      |   |   |   |                                          |   |
| IRAK3_HUMAN (Q9Y616) Interleukin-1 receptor-associated kinase 3 (EC 2.7.11.1) (IRAK-3) (IL-1 receptor-associated kinase M) (IRAK-M) [MASS=67752]                                                                       | *                          | 5.70  | *    | *    | * | 2 | 3 | LSIKTDVYSFGIVIMEVLTGC[339]R              | 1 |
| 3                                                                                                                                                                                                                      | FSWDEYEQYKKE               | 1     |      |      |   |   |   |                                          |   |
| IRK13_HUMAN (O60928) Inward rectifier potassium channel 13 (Potassium channel, inwardly rectifying subfamily J member 13) (Inward rectifier K(+) channel Kir7.1) [MASS=40529]                                          | 0.00                       | 5.83  | 0.95 | 0.00 | 1 | 1 | 2 | RTSYLPSEIMLHHC[330]FASLLTR               | 1 |
| IRK6_HUMAN (P48051) G protein-activated inward rectifier potassium channel 2 (GIRK2) (Potassium channel, inwardly rectifying subfamily J member 6) (Inward rectifier K(+) channel Kir3.2) (KATP-2) (BIR1) [MASS=48451] | *                          | 5.44  | *    | *    | * | 1 | 2 | EELEIVVILEGMVEATGMTC[330]QAR             | 1 |
| IRS2_HUMAN (Q9Y4H2) Insulin receptor substrate 2 (IRS-2) [MASS=137333]                                                                                                                                                 | *                          | 2.77  | *    | *    | * | 2 | 2 | C[339]SSC[330]RVRTASEGDGGAAGAAAAGAR      | 1 |
|                                                                                                                                                                                                                        |                            |       |      |      |   |   | 3 | TYSLTTPARQR                              | 1 |
| ISK5_HUMAN (Q9NQ38) Serine protease inhibitor Kazal-type 5 precursor (Lympho-epithelial Kazal-type-related inhibitor) (LEKTI) [Contains: Hemofiltrate peptide HF6478; Hemofiltrate peptide HF7665] [MASS=120758]       | *                          | 1.60  | *    | *    | * | 1 | 3 | DADGKSYNNQC[339]TM[147]C[330]KAK         | 1 |
| ISK6_HUMAN (Q6UWN8) Serine protease inhibitor Kazal-type 6 precursor [MASS=8585]                                                                                                                                       | *                          | 10.00 | *    | *    | * | 1 | 1 | AIVKSGGK                                 | 1 |

|                                                                                                                                                                                                                                                                              |      |       |      |      |   |   |   |                                         |   |
|------------------------------------------------------------------------------------------------------------------------------------------------------------------------------------------------------------------------------------------------------------------------------|------|-------|------|------|---|---|---|-----------------------------------------|---|
| ITA11_HUMAN (Q9UKX5) Integrin alpha-11 precursor [MASS=133609]                                                                                                                                                                                                               | 0.00 | 1.43  | 1.43 | 0.00 | 1 | 1 | 2 | FTNRAVLLSSGQELC[339]ER                  | 1 |
| ITA6_HUMAN (P23229) Integrin alpha-6 precursor (VLA-6) (CD49f antigen) [Contains: Integrin alpha-6 heavy chain; Integrin alpha-6 light chain] [MASS=126618]                                                                                                                  | *    | 1.15  | *    | *    | * | 1 | 3 | NPTKDGDDAHEAK                           | 1 |
| ITAD_HUMAN (Q13349) Integrin alpha-D precursor (Leukointegrin alpha D) (ADB2) (CD11d antigen) [MASS=126885]                                                                                                                                                                  | *    | 2.93  | *    | *    | * | 1 | 3 | LQYFGQALSGGQDLTQDGLM[147]DLAVGARGQVLLLR | 1 |
| JAD1C_HUMAN (P41229) Jumonji/ARID domain-containing protein 1C (SmcX protein) (Xe169 protein) [MASS=175804]                                                                                                                                                                  | *    | 3.21  | *    | *    | * | 3 | 2 | EELSHSPEPC[339]TKMTMR                   | 1 |
|                                                                                                                                                                                                                                                                              |      |       |      |      |   |   | 3 | VAQRLNYPGK                              | 1 |
|                                                                                                                                                                                                                                                                              |      |       |      |      |   |   | 3 | LLSSPRNPNTSSPLLAWEWDTK                  | 1 |
| JAG2_HUMAN (Q9Y219) Jagged-2 precursor (Jagged2) (HJ2) [MASS=133365]                                                                                                                                                                                                         | *    | 2.75  | *    | *    | * | 2 | 2 | WKSLEHFGHVAHLELQIR                      | 1 |
|                                                                                                                                                                                                                                                                              |      |       |      |      |   |   | 2 | RADEALPGPAGHA AVR                       | 1 |
| JARD2_HUMAN (Q92833) Jumonji protein (Jumonji/ARID domain-containing protein 2) [MASS=138734]                                                                                                                                                                                | 0.00 | 1.28  | 4.08 | 0.00 | 1 | 1 | 2 | YDEEQIISLVNQC[339]GK                    | 1 |
| JHD1B_HUMAN (Q8NHM5) JmjC domain-containing histone demethylation protein 1B (EC 1.14.11.-) (F-box/LRR-repeat protein 10) (F-box and leucine-rich repeat protein 10) (F-box protein FBL10) (Protein JEMMA) (Jumonji domain-containing EMSY-interactor methyltr [MASS=152614] | *    | 1.65  | *    | *    | * | 1 | 2 | RPTVVDLVDWVDNMWPQHLKEK                  | 1 |
| JHD2C_HUMAN (Q15652) Probable JmjC domain-containing histone demethylation protein 2C (EC 1.14.11.-) (Jumonji domain-containing protein 1C) (Thyroid receptor-interacting protein 8) (TRIP-8) [MASS=284523]                                                                  | 0.00 | 3.74  | 1.46 | 0.00 | 1 | 4 | 2 | NFQAVSQGSPSSVM[147]SAVNTMC[330]NTK      | 1 |
|                                                                                                                                                                                                                                                                              |      |       |      |      |   |   | 3 | LFKEC[330]WKQGQPAVVSGVHK                | 1 |
|                                                                                                                                                                                                                                                                              |      |       |      |      |   |   | 3 | HLMPTQIIPGSVLTDLDDAMHTLREKYGIK          | 1 |
|                                                                                                                                                                                                                                                                              |      |       |      |      |   |   | 3 | HLMPTQIIPGSVLTDLDDAM[147]HTLREKYGIK     | 1 |
|                                                                                                                                                                                                                                                                              |      |       |      |      |   |   | 3 | YVSYISPLSAVSVM[147]EDKLHKR              | 1 |
| JUN_HUMAN (P05412) Transcription factor AP-1 (Activator protein 1) (AP1) (Proto-oncogene c-jun) (V-jun avian sarcoma virus 17 oncogene homolog) (p39) [MASS=35675]                                                                                                           | 0.00 | 15.71 | 0.32 | 0.00 | 1 | 2 | 3 | MTAKMETTFYDDALNASFLPSESGPYGYSNPK        | 1 |
|                                                                                                                                                                                                                                                                              |      |       |      |      |   |   | 2 | VMNHVNSGC[330]QLM[147]LTQQLQTF          | 1 |
| K0152_HUMAN (Q14165) Protein KIAA0152 precursor [MASS=32234]                                                                                                                                                                                                                 | 0.00 | 10.27 | 1.19 | 0.00 | 1 | 1 | 3 | LYIEFVKGYDNPVKVC[339]ALYIMAGTVDDVPK     | 1 |

2 NLGMVC[339]R 11

K0196\_HUMAN (Q12768) Protein KIAA0196  
[MASS=134286] 0.00 1.38 32.92 0.02 3 2

2 PSELMPKLK 1

K0310\_HUMAN (O15027) Protein KIAA0310  
[MASS=233516] \* 0.92 \* \* \* 1 2

2 ADSGPTQPPLSLSPAPETKR 1

K0889\_HUMAN (O94964) Protein KIAA0889  
[MASS=55760] \* 5.41 \* \* \* 1 2

2 TKSVMSSM[147]SEFESLLDC[330]SPYLAGGDARGK 1

K1024\_HUMAN (Q9UPX6) UPF0258 protein  
KIAA1024 [MASS=102992] \* 2.40 \* \* \* 1 3

3 SDC[339]DSSPEHNLTKIANGVPNSK 1

K1219\_HUMAN (Q86X10) Protein KIAA1219  
[MASS=166797] \* 0.94 \* \* \* 1 3

3 YSVKHRPFPEEVDK 1

K1267\_HUMAN (Q7Z3B3) Protein KIAA1267  
[MASS=120965] 0.00 3.71 0.88 0.00 1 2

2 C[330]SEQAFDSDVTDSSSGGESDIEEELTR 1  
2 KAIAAEDPSLDFR 1

K6PP\_HUMAN (Q01813) 6-  
phosphofructokinase type C (EC 2.7.1.11)  
(Phosphofructokinase 1) (Phosphohexokinase)  
(Phosphofructo-1-kinase isozyme C) (PFK-C)  
(6-phosphofructokinase, platelet type)  
[MASS=85596] \* 6.38 \* \* \* 2

3 EIGWTDVGGWTGQGGSSILGTRVLP GK 1  
3 VTILGHVQRGGTPSAFDRILASR 2

KAP2\_HUMAN (P13861) cAMP-dependent  
protein kinase type II-alpha regulatory subunit  
[MASS=45387] 0.00 2.48 1.48 0.00 1 1

2 LLGPC[339]M[147]DIM[147]K 1

|                                                                   |      |       |      |      |    |   |  |   |                                          |   |
|-------------------------------------------------------------------|------|-------|------|------|----|---|--|---|------------------------------------------|---|
|                                                                   |      |       |      |      |    |   |  | 3 | MC[339]DPGM[147]TAFEPEALGNLVEGLDFHR      | 3 |
|                                                                   |      |       |      |      |    |   |  | 3 | MC[330]DPGM[147]TAFEPEALGNLVEGLDFHR      | 3 |
|                                                                   |      |       |      |      |    |   |  | 2 | QETVDC[330]LKK                           | 1 |
|                                                                   |      |       |      |      |    |   |  | 3 | NSKPVHTTILNPHIHLM[147]GDESAC[330]IAYIR   | 1 |
|                                                                   |      |       |      |      |    |   |  | 2 | STVASC[339]M[147]HR                      | 3 |
| KCC2A_HUMAN (Q9UQM7)                                              |      |       |      |      |    |   |  | 3 | M[147]C[330]DPGMTAFEPEALGNLVEGLDFHR      | 1 |
| Calcium/calmodulin-dependent protein kinase                       |      |       |      |      |    |   |  | 2 | QETVDC[339]LKK                           | 1 |
| type II alpha chain (EC 2.7.11.17) (CaM-kinase                    | 1.00 | 19.04 | 0.82 | 0.14 | 29 | 5 |  | 3 | M[147]C[339]DPGMTAFEPEALGNLVEGLDFHR      | 1 |
| II alpha chain) (CaM kinase II alpha subunit)                     |      |       |      |      |    |   |  | 3 | M[147]C[339]DPGM[147]TAFEPEALGNLVEGLDFHR | 5 |
| (CaMK-II subunit alpha) [MASS=54029]                              |      |       |      |      |    |   |  |   |                                          |   |
|                                                                   |      |       |      |      |    |   |  | 2 | STVASC[330]M[147]HR                      | 3 |
|                                                                   |      |       |      |      |    |   |  | 2 | DGKWQIVHFHRSVLP                          | 1 |
|                                                                   |      |       |      |      |    |   |  | 3 | M[147]C[330]DPGM[147]TAFEPEALGNLVEGLDFHR | 3 |
|                                                                   |      |       |      |      |    |   |  | 3 | NSKPVHTTILNPHIHLM[147]GDESAC[339]IAYIR   | 1 |
|                                                                   |      |       |      |      |    |   |  | 2 | MC[330]DPGMTAFEPEALGNLVEGLDFHR           | 1 |
| KCC2A_HUMAN (Q9UQM7)                                              |      |       |      |      |    |   |  | 2 | M[147]C[339]DPGM[147]TAFEPEALGNLVEGLDFHR | 3 |
| Calcium/calmodulin-dependent protein kinase                       | 1.00 | 19.04 | 0.82 | 0.14 | 29 | 5 |  |   |                                          |   |
| type II alpha chain (EC 2.7.11.17) (CaM-kinase                    |      |       |      |      |    |   |  | 3 | MC[330]DPGMTAFEPEALGNLVEGLDFHR           | 1 |
| II alpha chain) (CaM kinase II alpha subunit)                     |      |       |      |      |    |   |  |   |                                          |   |
| (CaMK-II subunit alpha) [MASS=54029]                              |      |       |      |      |    |   |  |   |                                          |   |
| KCC2B_HUMAN (Q13554)                                              |      |       |      |      |    |   |  | 3 | NSKPIHTTILNPHVHVIGEDAAC[339]IAYIR        | 1 |
| Calcium/calmodulin-dependent protein kinase                       |      |       |      |      |    |   |  | 3 | SRGAPAC[339]PSPAPFSPSPAPSPRISDILNSVR     | 1 |
| type II beta chain (EC 2.7.11.17) (CaM-kinase II beta chain) (CaM | 1.00 | 14.16 | 1.02 | 0.14 | 4  | 4 |  | 3 | IC[339]DPGLTSFEPEALGNLVEGM[147]DFHR      | 2 |
| kinase II subunit beta) (CaMK-II subunit beta)                    |      |       |      |      |    |   |  | 2 | LC[339]TGHEYAAK                          | 1 |
| [MASS=72726]                                                      |      |       |      |      |    |   |  | 3 | IC[330]DPGLTSFEPEALGNLVEGM[147]DFHR      | 1 |



|                                                                                                                                                                                                                                                                             |      |       |      |      |   |   |   |                                              |   |
|-----------------------------------------------------------------------------------------------------------------------------------------------------------------------------------------------------------------------------------------------------------------------------|------|-------|------|------|---|---|---|----------------------------------------------|---|
| KCC2D_HUMAN (Q13557) Calcium/calmodulin-dependent protein kinase type II delta chain (EC 2.7.11.17) (CaM-kinase II delta chain) (CaM kinase II subunit delta) (CaMK-II subunit delta) [MASS=56297]                                                                          | 1.00 | 13.03 | 0.83 | 0.12 | 5 | 3 | 3 | IC[330]DPGLTAFEPEALGNLVEGM[147]DFHR          | 1 |
|                                                                                                                                                                                                                                                                             |      |       |      |      |   |   | 3 | IC[330]DPGLTAFEPEALGNLVEGMDFHR               | 1 |
|                                                                                                                                                                                                                                                                             |      |       |      |      |   |   | 3 | M[147]ASTTTC[339]TRFTDEYQLFEELGK             | 1 |
|                                                                                                                                                                                                                                                                             |      |       |      |      |   |   | 3 | IC[339]DPGLTAFEPEALGNLVEGM[147]DFHR          | 3 |
|                                                                                                                                                                                                                                                                             |      |       |      |      |   |   | 2 | STVASM[147]MHRQETVDC[339]LKK                 | 1 |
| KCC2G_HUMAN (Q13555) Calcium/calmodulin-dependent protein kinase type II gamma chain (EC 2.7.11.17) (CaM-kinase II gamma chain) (CaM kinase II gamma subunit) (CaMK-II subunit gamma) [MASS=62609]                                                                          | 0.99 | 8.06  | 1.06 | 0.23 | 2 | 2 | 3 | TAPSAGM[147]QPQPSLC[339]SSAM[147]RK          | 1 |
|                                                                                                                                                                                                                                                                             |      |       |      |      |   |   | 3 | IC[330]DPGLTSFEPEALGNLVEGM[147]DFHK          | 1 |
| KCMB3_HUMAN (Q9NPA1) Calcium-activated potassium channel subunit beta 3 (Calcium-activated potassium channel, subfamily M subunit beta 3) (Maxi K channel subunit beta 3) (BK channel subunit beta 3) (Slo-beta 3) (K(VCA)beta 3) (Charybdotoxin receptor subu [MASS=31603] | 0.00 | 5.38  | 0.30 | 0.00 | 1 | 1 | 2 | VPYIEQHQQFKLC[330]IM[147]R                   | 1 |
| KCND3_HUMAN (Q9UK17) Potassium voltage-gated channel subfamily D member 3 (Voltage-gated potassium channel subunit Kv4.3) [MASS=73451]                                                                                                                                      | 0.00 | 2.75  | 1.34 | 0.00 | 1 | 1 | 2 | SPSLSSHPLTTTC[339]C[339]SRR                  | 1 |
| KCNG2_HUMAN (Q9UJ96) Potassium voltage-gated channel subfamily G member 2 (Voltage-gated potassium channel subunit Kv6.2) (Cardiac potassium channel subunit) [MASS=51239]                                                                                                  | 0.00 | 6.65  | 2.78 | 0.00 | 1 | 1 | 3 | LFAC[339]VSVSFVAVTAVGLC[339]LSTMPDIRAEEER    | 1 |
| KCCKF_HUMAN (Q9H427) Potassium channel subfamily K member 15 (Acid-sensitive potassium channel protein TASK-5) (TWIK-related acid-sensitive K(+) channel 5) (Two pore potassium channel KT3.3) [MASS=36130]                                                                 | 0.00 | 14.85 | 0.81 | 0.10 | 2 | 2 | 3 | RPARSVGSASVFC[330]HVHK                       | 1 |
|                                                                                                                                                                                                                                                                             |      |       |      |      |   |   | 3 | AAGLVLC[330]TLC[330]YLLVGA AVFDAL ESEAESGRQR | 1 |

|                                                                                                                                                                 |      |       |      |      |    |   |  |   |                                       |   |
|-----------------------------------------------------------------------------------------------------------------------------------------------------------------|------|-------|------|------|----|---|--|---|---------------------------------------|---|
|                                                                                                                                                                 |      |       |      |      |    |   |  | 2 | FC[339]TGLTQIETLFK                    | 1 |
|                                                                                                                                                                 |      |       |      |      |    |   |  | 2 | FC[330]TGLTQIETLFK                    | 2 |
|                                                                                                                                                                 |      |       |      |      |    |   |  | 2 | GFC[330]LPPHC[330]SR                  | 6 |
| KCRB_HUMAN (P12277) Creatine kinase B-type (EC 2.7.3.2) (Creatine kinase B chain) (B-CK) [MASS=42644]                                                           | 1.00 | 23.62 | 0.73 | 0.12 | 14 | 5 |  | 3 | SKDYEFM[147]WNPHLGYILTC[330]PSNLGTGLR | 1 |
|                                                                                                                                                                 |      |       |      |      |    |   |  | 2 | LEQGQAIDDLM[147]PAQK                  | 1 |
|                                                                                                                                                                 |      |       |      |      |    |   |  | 3 | LGFEVELVQMVVDGVKLLIEMEQR              | 2 |
|                                                                                                                                                                 |      |       |      |      |    |   |  | 2 | GFC[339]LPPHC[339]SR                  | 4 |
| KCRS_HUMAN (P17540) Creatine kinase, sarcomeric mitochondrial precursor (EC 2.7.3.2) (S-MtCK) (Mib-CK) (Basic-type mitochondrial creatine kinase) [MASS=47520]  | 0.00 | 6.21  | *    | *    | *  | 2 |  | 2 | LGYILTC[339]PSNLGTGLR                 | 2 |
|                                                                                                                                                                 |      |       |      |      |    |   |  | 2 | GLSLPPAC[339]TR                       | 3 |
|                                                                                                                                                                 |      |       |      |      |    |   |  | 2 | GLSLPPAC[330]TR                       | 1 |
|                                                                                                                                                                 |      |       |      |      |    |   |  | 2 | HNNC[330]M[147]ASHLTPAVYAR            | 4 |
|                                                                                                                                                                 |      |       |      |      |    |   |  | 3 | HNNC[339]M[147]ASHLTPAVYAR            | 4 |
| KCRU_HUMAN (P12532) Creatine kinase, ubiquitous mitochondrial precursor (EC 2.7.3.2) (U-MtCK) (Mia-CK) (Acidic-type mitochondrial creatine kinase) [MASS=47036] | 1.00 | 6.47  | 1.58 | 0.05 | 19 | 2 |  | 3 | HTTDLASKIR                            | 1 |
|                                                                                                                                                                 |      |       |      |      |    |   |  | 3 | HNNC[330]M[147]ASHLTPAVYAR            | 3 |
|                                                                                                                                                                 |      |       |      |      |    |   |  | 2 | HNNC[339]M[147]ASHLTPAVYAR            | 4 |

|                                                                                                                                                                                                                     |      |      |       |      |   |    |   |                                          |   |
|---------------------------------------------------------------------------------------------------------------------------------------------------------------------------------------------------------------------|------|------|-------|------|---|----|---|------------------------------------------|---|
| KEAP1_HUMAN (Q14145) Kelch-like ECH-associated protein 1 (Cytosolic inhibitor of Nrf2) (Kelch-like protein 19) [MASS=69665]                                                                                         | 0.00 | 3.04 | 10.91 | 0.00 | 1 | 1  | 3 | M[147]TSGRSGVGVAVTMEPC[339]RK            | 1 |
| KGP2_HUMAN (Q13237) cGMP-dependent protein kinase 2 (EC 2.7.11.12) (CGK 2) (cGKII) (Type II cGMP-dependent protein kinase) [MASS=87432]                                                                             | 0.00 | 2.49 | 1.21  | 0.00 | 1 | 1  | 2 | YVYM[147]LLEAC[330]LGGELWSILR            | 1 |
| KI67_HUMAN (P46013) Antigen KI-67 [MASS=358743]                                                                                                                                                                     | 0.00 | 5.31 | 1.71  | 0.00 | 1 | 10 | 2 | ATLLQQRREGEMK                            | 1 |
|                                                                                                                                                                                                                     |      |      |       |      |   |    | 2 | TPSVGKAM[147]DTPK                        | 1 |
|                                                                                                                                                                                                                     |      |      |       |      |   |    | 2 | PELFDENLPPNTPLKRGEAPTK                   | 1 |
|                                                                                                                                                                                                                     |      |      |       |      |   |    | 2 | GQNLLQTQDHAKAPKSEK                       | 1 |
|                                                                                                                                                                                                                     |      |      |       |      |   |    | 2 | GKGEAGNSDSM[147]C[339]LRSR               | 1 |
|                                                                                                                                                                                                                     |      |      |       |      |   |    | 2 | QMLDPANYGTGMRWPR                         | 1 |
|                                                                                                                                                                                                                     |      |      |       |      |   |    | 2 | VLNNFISNQKMDFKEDLSGIAEMFK                | 1 |
|                                                                                                                                                                                                                     |      |      |       |      |   |    | 1 | RGGERVATC[339]LQK                        | 1 |
|                                                                                                                                                                                                                     |      |      |       |      |   |    | 2 | EEPSAVKFTQTSGETTDADKEPAGEDK              | 1 |
|                                                                                                                                                                                                                     |      |      |       |      |   |    | 2 | AQPLEDLAGWK                              | 1 |
| KIF1B_HUMAN (O60333) Kinesin-like protein KIF1B (Klp) [MASS=204431]                                                                                                                                                 | 0.00 | 1.32 | 0.98  | 0.00 | 1 | 1  | 2 | SFSFDYSYWSHTSPEDPC[339]FASQNR            | 1 |
| KIF1C_HUMAN (O43896) Kinesin-like protein KIF1C [MASS=123071]                                                                                                                                                       | 0.00 | 3.45 | 0.66  | 0.00 | 1 | 2  | 3 | C[339]HDQLTGLDSEKVKISLVDLAGSER           | 1 |
|                                                                                                                                                                                                                     |      |      |       |      |   |    | 2 | C[330]HDQLTGLDSEK                        | 1 |
| KIRR2_HUMAN (Q6UWL6) Kin of IRRE-like protein 2 precursor (Kin of irregular chiasm-like protein 2) (Nephrin-like protein 3) [MASS=75093]                                                                            | *    | 3.53 | *     | *    | * | 1  | 3 | LPC[339]ALGAYWGLVQWTKSGLALGGQR           | 1 |
| KKCC2_HUMAN (Q96RR4) Calcium/calmodulin-dependent protein kinase kinase 2 (EC 2.7.11.17) (Calcium/calmodulin-dependent protein kinase kinase beta) (CaM-kinase kinase beta) (CaM-KK beta) (CaMKK beta) [MASS=64731] | 0.96 | 2.21 | 0.31  | 0.00 | 1 | 1  | 2 | GTRPAPGGC[330]IQPR                       | 1 |
| KLDC5_HUMAN (Q9P2K6) Kelch domain-containing protein 5 [MASS=56867]                                                                                                                                                 | 0.00 | 4.75 | 0.31  | 0.00 | 1 | 1  | 2 | QQM[147]VSVEETIYIVGGC[330]LHELGPNR       | 1 |
| KLF11_HUMAN (O14901) Krueppel-like factor 11 (Transforming growth factor-beta-inducible early growth response protein 2) (TGFB-inducible early growth response protein 2) (TIEG-2) [MASS=55139]                     | 0.00 | 8.98 | 1.33  | 0.00 | 1 | 2  | 2 | AC[339]TATDVLQSSAVVAR                    | 1 |
|                                                                                                                                                                                                                     |      |      |       |      |   |    | 3 | GTSVIRHTGESPAAC[339]FPTIQTPDC[330]RLSDSR | 1 |

|                                                                                                                                                                                                                                                      |      |       |      |      |   |   |                  |                                                                                                                                 |                  |
|------------------------------------------------------------------------------------------------------------------------------------------------------------------------------------------------------------------------------------------------------|------|-------|------|------|---|---|------------------|---------------------------------------------------------------------------------------------------------------------------------|------------------|
| KLH17_HUMAN (Q6TDP4) Kelch-like protein 17 (Actinfilin) [MASS=69874]                                                                                                                                                                                 | 0.00 | 3.58  | 0.52 | 0.00 | 1 | 2 | 2                | HYHDAFVAMSRM[147]R<br>2 WVAASC[330]M[147]FTR                                                                                    | 1<br>1           |
| KLK13_HUMAN (Q9UKR3) Kallikrein-13 precursor (EC 3.4.21.-) (Kallikrein-like protein 4) (KLK-L4) [MASS=30570]                                                                                                                                         | *    | 2.53  | *    | *    | * | 1 | 2                | YETQQQK                                                                                                                         | 1                |
| KLKB1_HUMAN (P03952) Plasma kallikrein precursor (EC 3.4.21.34) (Plasma prekallikrein) (Kininogenin) (Fletcher factor) [Contains: Plasma kallikrein heavy chain; Plasma kallikrein light chain] [MASS=71369]                                         | *    | 4.23  | *    | *    | * | 1 | 2                | TSESGTPSSSTPQENTISGYSLLTLC[330]KR                                                                                               | 1                |
| KNTC1_HUMAN (P50748) Kinetochore-associated protein 1 (Rough deal homolog) (hRod) (HsROD) (Rod) [MASS=250747]                                                                                                                                        | *    | 1.86  | *    | *    | * | 3 | 1<br>3<br>2      | KLQGQIK<br>LMKFSLDTLYVSTAKHVFEK<br>TSVDILKILC[330]DIQK                                                                          | 1<br>1<br>1      |
| KPCA_HUMAN (P17252) Protein kinase C alpha type (EC 2.7.11.13) (PKC-alpha) (PKC-A) [MASS=76632]                                                                                                                                                      | *    | 5.37  | *    | *    | * | 2 | 2<br>3           | DAKNLIPMDPNGLSDPYVK<br>KDVVIQDDDDVEC[330]TM[147]VEK                                                                             | 1<br>1           |
| KPCT_HUMAN (Q04759) Protein kinase C theta type (EC 2.7.11.13) (nPKC-theta) [MASS=81864]                                                                                                                                                             | *    | 5.67  | *    | *    | * | 3 | 2<br>2<br>2      | C[330]DAC[330]GM[147]NVVHRC[339]QTK<br>IEDFILHKMLGKGSFGK<br>FKIDMPHR                                                            | 1<br>1<br>1      |
| KPYM_HUMAN (P14618) Pyruvate kinase isozymes M1/M2 (EC 2.7.1.40) (Pyruvate kinase muscle isozyme) (Cytosolic thyroid hormone-binding protein) (CTHBP) (THBP1) [MASS=57805]                                                                           | 1.00 | 11.51 | 0.70 | 0.03 | 3 | 4 | 1<br>2           | KVLGEK GK<br>NTGIIC[330]TIGPASR                                                                                                 | 1<br>2           |
| KRHB2_HUMAN (Q9NSB4) Keratin, type II cuticular Hb2 (Hair keratin, type II Hb2) [MASS=56683]                                                                                                                                                         | *    | 6.24  | *    | *    | * | 2 | 3<br>2           | ALGC[330]LGSRLC[339]NVGFGR<br>NKLLETKWVFM[147]QQQR                                                                              | 1<br>1           |
| KS6A2_HUMAN (Q15349) Ribosomal protein S6 kinase alpha-2 (EC 2.7.11.1) (S6K-alpha 2) (90 kDa ribosomal protein S6 kinase 2) (p90-RSK 2) (Ribosomal S6 kinase 3) (RSK-3) (pp90RSK3) (MAP kinase-activated protein kinase 1c) (MAPKAPK1C) [MASS=83238] | 0.00 | 4.09  | 1.67 | 0.00 | 1 | 2 | 3<br>3           | TMDYLHSQGVVHR<br>NPC[339]NRLGAGIDGVVEIK                                                                                         | 2<br>1           |
| KSR2_HUMAN (Q6VAB6) Kinase suppressor of ras-2 (hKSR2) [MASS=93585]                                                                                                                                                                                  | *    | 6.76  | *    | *    | * | 3 | 1<br>2<br>3<br>3 | HAVRTPPR<br>TQPAEAIWQM[147]GTGM[147]KPNLSQIGM[147]GK<br>EISDILLFC[339]WAFEQEERPTFTK<br>TQPAEAIWQM[147]GTGM[147]KPNLSQIGM[147]GK | 1<br>1<br>1<br>1 |

|                                                                                                                                                                            |      |       |      |      |   |   |   |                                             |   |
|----------------------------------------------------------------------------------------------------------------------------------------------------------------------------|------|-------|------|------|---|---|---|---------------------------------------------|---|
| L1CAM_HUMAN (P32004) Neural cell adhesion molecule L1 precursor (N-CAM L1) (CD171 antigen) [MASS=140002]                                                                   | 1.00 | 7.32  | 0.67 | 0.01 | 2 | 5 | 2 | HIHKDHVVVPANTTSVILSGLR                      | 1 |
|                                                                                                                                                                            |      |       |      |      |   |   | 2 | C[330]EASGKPEVQFR                           | 1 |
|                                                                                                                                                                            |      |       |      |      |   |   | 1 | DGVHFK                                      | 3 |
| LAC_HUMAN (P01842) Ig lambda chain C regions [MASS=11236]                                                                                                                  | 0.30 | 14.29 | 1.57 | 0.00 | 1 | 1 | 2 | C[339]FASNKLG TAM[147]SHEIRLM[147]AEGAPK    | 1 |
|                                                                                                                                                                            |      |       |      |      |   |   | 3 | ETVKPVEVEEGESVVLPC[330]NPPPSAEPLR           | 1 |
| LARP1_HUMAN (Q6PKG0) La-related protein 1 (La ribonucleoprotein domain family member 1) [MASS=123509]                                                                      | 0.00 | 7.85  | 1.23 | 0.00 | 1 | 4 | 3 | C[339]PSQSSSRPAAMISQPPTPTGQPVREDAK          | 1 |
|                                                                                                                                                                            |      |       |      |      |   |   | 2 | RDFVEAPPPK                                  | 1 |
|                                                                                                                                                                            |      |       |      |      |   |   | 2 | C[330]PSQSSSRPAAMISQPPTPTGQPV R             | 1 |
|                                                                                                                                                                            |      |       |      |      |   |   | 3 | GLSASLPDL DSENWIEVKKR                       | 1 |
| LATS1_HUMAN (O95835) Serine/threonine-protein kinase LATS1 (EC 2.7.11.1) (Large tumor suppressor homolog 1) (WARTS protein kinase) (h-warts) [MASS=126869]                 | 0.00 | 1.50  | 0.23 | 0.00 | 1 | 1 | 2 | QDSM[147]DFSNEWGDPSSC[330]R                 | 1 |
| LBC_HUMAN (Q12802) LBC oncogene (P47) (Lymphoid blast crisis oncogene) [MASS=49052]                                                                                        | *    | 5.42  | *    | *    | * | 1 | 2 | IM[147]SGVYSQGM MADLLFEQQM[147]VEK          | 1 |
| LCB2_HUMAN (O15270) Serine palmitoyltransferase 2 (EC 2.3.1.50) (Long chain base biosynthesis protein 2) (LCB 2) (Serine-palmitoyl-CoA transferase 2) (SPT 2) [MASS=62924] | *    | 10.68 | *    | *    | * | 2 | 3 | C[339]HHATEREEQKDFVSLYQDFENFYTR             | 1 |
|                                                                                                                                                                            |      |       |      |      |   |   | 3 | EMGFIIYGNEDSPVVLMLYM[147]PAKIGAFGREM[147]LK | 1 |
| LCMT2_HUMAN (O60294) Leucine carboxyl methyltransferase 2 (EC 2.1.1.-) (p21WAF1/CIP1 promoter-interacting protein) [MASS=75601]                                            | *    | 3.06  | *    | *    | * | 1 | 3 | AVRHC[339]VRAFLEQIGAPQAALR                  | 1 |
| LDB1_HUMAN (Q86U70) LIM domain-binding protein 1 (Carboxyl-terminal LIM domain-binding protein 2) (CLIM-2) (LIM domain-binding factor CLIM2) [MASS=42809]                  | *    | 13.33 | *    | *    | * | 2 | 2 | RKMSGGSTMSSGGGNTNNSNSK                      | 1 |
|                                                                                                                                                                            |      |       |      |      |   |   | 3 | C[339]GLSNSTLNLYRLC[330]VILEPM[147]QELMSRHK | 1 |
| LDH6A_HUMAN (Q6ZMR3) L-lactate dehydrogenase A-like 6A (EC 1.1.1.27) [MASS=36507]                                                                                          | 0.00 | 12.65 | *    | *    | * | 3 | 3 | LKGETM[147]DLQHGSPPFM[147]K                 | 1 |
|                                                                                                                                                                            |      |       |      |      |   |   | 2 | GETMDLQHGSPPFM[147]K                        | 1 |
|                                                                                                                                                                            |      |       |      |      |   |   | 2 | VIGSGC[330]NLDSAR                           | 1 |
| LDHB_HUMAN (P07195) L-lactate dehydrogenase B chain (EC 1.1.1.27) (LDH-B) (LDH heart subunit) (LDH-H) (NY-REN-46 antigen) [MASS=36507]                                     | 1.00 | 9.61  | 0.68 | 0.18 | 2 | 2 | 2 | LNLVQRNVNFK                                 | 1 |
|                                                                                                                                                                            |      |       |      |      |   |   | 2 | GM[147]YGIENEVFLSLPC[330]ILNAR              | 1 |

|                                                                                                                                                                                                                                                        |      |       |      |      |   |   |   |                                                    |   |
|--------------------------------------------------------------------------------------------------------------------------------------------------------------------------------------------------------------------------------------------------------|------|-------|------|------|---|---|---|----------------------------------------------------|---|
| LEF1_HUMAN (Q9UJU2) Lymphoid enhancer-binding factor 1 (LEF-1) (T cell-specific transcription factor 1-alpha) (TCF1-alpha) [MASS=44200]                                                                                                                | 0.00 | 9.02  | 0.23 | 0.00 | 1 | 1 | 3 | M[147]PQLSGGGGGGGDPELC[330]ATDEM[147]IPFKDEGDPQKEK | 1 |
| LEG1_HUMAN (P09382) Galectin-1 (Lectin galactoside-binding soluble 1) (Beta-galactoside-binding lectin L-14-I) (Lactose-binding lectin 1) (S-Lac lectin 1) (Galaptin) (14 kDa lectin) (HPL) (HBL) (Putative MAPK-activating protein MP12) [MASS=14584] | 1.00 | 20.15 | 0.86 | 0.09 | 4 | 2 | 2 | DSNNLC[330]LHFNPR                                  | 1 |
|                                                                                                                                                                                                                                                        |      |       |      |      |   |   | 2 | FNAHGDANTIVC[330]NSK                               | 1 |
|                                                                                                                                                                                                                                                        |      |       |      |      |   |   | 2 | DSNNLC[339]LHFNPR                                  | 2 |
| LEG4_HUMAN (P56470) Galectin-4 (Lactose-binding lectin 4) (L-36 lactose-binding protein) (L36LBP) (Antigen NY-CO-27) [MASS=35941]                                                                                                                      | *    | 4.02  | *    | *    | * | 1 | 3 | TIIIKGYVPPTGK                                      | 3 |
| LEPR_HUMAN (P48357) Leptin receptor precursor (LEP-R) (OB receptor) (OB-R) (HuB219) (CD295 antigen) [MASS=132449]                                                                                                                                      | 0.00 | 4.64  | 3.41 | 0.00 | 1 | 2 | 2 | HQSDAGLYVIVPVISSSILLLGLLLISHQRMK                   | 1 |
|                                                                                                                                                                                                                                                        |      |       |      |      |   |   | 3 | M[147]TC[330]RWSTSTIQSLAESTLQLR                    | 1 |
| LGI1_HUMAN (O95970) Leucine-rich glioma-inactivated protein 1 precursor (Epitempin-1) [MASS=63818]                                                                                                                                                     | *    | 3.23  | *    | *    | * | 1 | 2 | C[339]PAVC[330]JTC[339]TKDNALC[339]ENAR            | 1 |
| LGI3_HUMAN (Q8N145) Leucine-rich repeat LGI family member 3 precursor (Leucine-rich glioma-inactivated protein 3) (LGI1-like protein 4) [MASS=61704]                                                                                                   | *    | 4.74  | *    | *    | * | 1 | 3 | ARGGPGPGLLALSALGFC[330]LM[147]LQVSAK               | 1 |
| LGI4_HUMAN (Q8N135) Leucine-rich repeat LGI family member 4 precursor (Leucine-rich glioma-inactivated protein 4) (LGI1-like protein 3) [MASS=59141]                                                                                                   | *    | 3.54  | *    | *    | * | 1 | 2 | AFAHITMAGRRFLFAAC[330]FK                           | 1 |
| LHX3_HUMAN (Q9UBR4) LIM/homeobox protein Lhx3 [MASS=43358]                                                                                                                                                                                             | 0.00 | 8.06  | 3.74 | 0.00 | 1 | 3 | 2 | SAYNTSPK                                           | 1 |
|                                                                                                                                                                                                                                                        |      |       |      |      |   |   | 3 | WGQYFRNMK                                          | 1 |
|                                                                                                                                                                                                                                                        |      |       |      |      |   |   | 2 | EIPLC[339]AGC[339]DQHILDR                          | 1 |
| LIPA3_HUMAN (O75145) Liprin-alpha-3 (Protein tyrosine phosphatase receptor type f polypeptide-interacting protein alpha-3) (PTPRF-interacting protein alpha-3) [MASS=133495]                                                                           | 0.00 | 3.69  | 1.13 | 0.00 | 1 | 3 | 1 | ADGVSVR                                            | 1 |
|                                                                                                                                                                                                                                                        |      |       |      |      |   |   | 3 | M[147]TVVKRQAQSPGGVSSEVEVLK                        | 1 |
|                                                                                                                                                                                                                                                        |      |       |      |      |   |   | 2 | MM[147]C[330]EVM[147]PTISEDGRR                     | 1 |

|                                                                                                                                                                                                |      |       |      |      |   |   |   |                                        |   |
|------------------------------------------------------------------------------------------------------------------------------------------------------------------------------------------------|------|-------|------|------|---|---|---|----------------------------------------|---|
| LIPB2_HUMAN (Q8ND30) Liprin-beta-2 (Protein tyrosine phosphatase receptor type f polypeptide-interacting protein-binding protein 2) (PTPRF-interacting protein-binding protein 2) [MASS=98444] | 0.00 | 7.08  | 0.44 | 0.00 | 1 | 3 | 2 | M[147]ASDASHALEAALEQM[147]DGIIAGTK     | 1 |
|                                                                                                                                                                                                |      |       |      |      |   |   | 3 | KAEELLQELRHLK                          | 1 |
|                                                                                                                                                                                                |      |       |      |      |   |   | 2 | QEM[147]PPRC[330]SSPTVGPPLPQKSLETR     | 1 |
| LMO4_HUMAN (P61968) LIM domain transcription factor LMO4 (LIM domain only protein 4) (LMO-4) (Breast tumor autoantigen) [MASS=17994]                                                           | 0.00 | 12.12 | 0.57 | 0.00 | 1 | 1 | 2 | IADRFLLYAMDSYWHSRC[330]LK              | 1 |
| LOX15_HUMAN (P16050) Arachidonate 15-lipoxygenase (EC 1.13.11.33) (Arachidonate omega-6 lipoxygenase) (15-LOX) [MASS=74673]                                                                    | *    | 3.63  | *    | *    | * | 1 | 2 | RSAHLPARLVFPPGMEELQAQLEK               | 1 |
| LPP1_HUMAN (O14494) Lipid phosphate phosphohydrolase 1 (EC 3.1.3.4) (Phosphatidic acid phosphatase 2a) (Phosphatidate phosphohydrolase type 2a) (PAP2a) (PAP-2a) (PAP2-alpha) [MASS=32156]     | 0.00 | 10.56 | 0.90 | 0.00 | 1 | 1 | 3 | MFDKTRLPHYVALDVLC[330]VLLAGLPFAILTSR   | 1 |
| LPPRC_HUMAN (P42704) 130 kDa leucine-rich protein (LRP 130) (GP130) (Leucine-rich PPR motif-containing protein) [MASS=145200]                                                                  | 0.00 | 2.20  | 1.41 | 0.00 | 1 | 2 | 2 | AENQPIR                                | 1 |
|                                                                                                                                                                                                |      |       |      |      |   |   | 2 | EVQM[147]HSFPLQFTLHC[339]ALLANK        | 1 |
| LRC19_HUMAN (Q9H756) Leucine-rich repeat-containing protein 19 precursor [MASS=42334]                                                                                                          | 0.00 | 4.05  | 5.72 | 0.05 | 2 | 1 | 3 | C[339]PIWYNILLSYNHHR                   | 2 |
| LRC47_HUMAN (Q8N1G4) Leucine-rich repeat-containing protein 47 [MASS=63472]                                                                                                                    | 0.00 | 11.84 | 0.61 | 0.00 | 1 | 3 | 3 | VLDLSGNALEALPPGQGLGPAEPPGLPQLQSLNLSGNR | 1 |
|                                                                                                                                                                                                |      |       |      |      |   |   | 2 | GKGRAEGSEK                             | 1 |
|                                                                                                                                                                                                |      |       |      |      |   |   | 2 | TLDLSNNQLSEIPAELADC[330]PK             | 1 |
| LRC59_HUMAN (Q96AG4) Leucine-rich repeat-containing protein 59 [MASS=34930]                                                                                                                    | 0.00 | 5.86  | 2.47 | 0.00 | 1 | 1 | 2 | LLLLLLFGVAGGLVAC[339]R                 | 1 |
| LRC8E_HUMAN (Q6NSJ5) Leucine-rich repeat-containing protein 8E [MASS=90277]                                                                                                                    | 0.00 | 2.76  | 1.09 | 0.00 | 1 | 1 | 3 | FLAILVYNLVYVEKISFLVAC[339]R            | 1 |

|                                                                                                                                                                                     |      |       |      |      |   |   |   |                                                   |   |
|-------------------------------------------------------------------------------------------------------------------------------------------------------------------------------------|------|-------|------|------|---|---|---|---------------------------------------------------|---|
| LRP1B_HUMAN (Q9NZR2) Low-density lipoprotein receptor-related protein 1B precursor (Low-density lipoprotein receptor-related protein-deleted in tumor) (LRP-DIT) [MASS=515496]      | *    | 2.72  | *    | *    | * | 6 | 3 | NTHGSYTC[339]SC[330]VEGYLMQPDNRSC[330]K           | 1 |
|                                                                                                                                                                                     |      |       |      |      |   |   | 2 | LDGSLRRTLIAGAMEHPRAIALDPR                         | 1 |
|                                                                                                                                                                                     |      |       |      |      |   |   | 2 | TKSLSRAHK                                         | 3 |
| LRP2_HUMAN (P98164) Low-density lipoprotein receptor-related protein 2 precursor (Megalin) (Glycoprotein 330) (gp330) [MASS=521928]                                                 | 0.00 | 2.19  | 0.66 | 0.00 | 1 | 6 | 3 | PRDIAVDWVAGNIYWTDHSR                              | 1 |
|                                                                                                                                                                                     |      |       |      |      |   |   | 3 | YSINVGQLNGPNC[339]TRLLTNMAGEPYAIAVNP              | 1 |
|                                                                                                                                                                                     |      |       |      |      |   |   | 2 | C[339]DMDGM[147]NRTRIIDSK                         | 1 |
|                                                                                                                                                                                     |      |       |      |      |   |   | 3 | SMAMSEDFVM[147]EM[147]GK                          | 1 |
|                                                                                                                                                                                     |      |       |      |      |   |   | 3 | C[339]ISYKVC[330]DGILDC[330]PGR                   | 1 |
|                                                                                                                                                                                     |      |       |      |      |   |   | 3 | VGM[147]DGTNKSVIISTK                              | 1 |
| LRRC7_HUMAN (Q96NW7) Leucine-rich repeat-containing protein 7 (Protein LAP1) (Densin-180) [MASS=172580]                                                                             | *    | 4.03  | *    | *    | * | 3 | 2 | ESTEIPSPFSPGVPWEYHDSNPNR                          | 1 |
|                                                                                                                                                                                     |      |       |      |      |   |   | 3 | EIGSC[330]KNVTVMSLRSNK                            | 1 |
|                                                                                                                                                                                     |      |       |      |      |   |   | 3 | SM[147]C[339]TPLPVAQSTTLPSLSGR                    | 1 |
| LRSM1_HUMAN (Q6UWE0) Ubiquitin ligase protein LRSAM1 (EC 6.3.2.-) (Leucine-rich repeat and sterile alpha motif-containing protein 1) (Tsg101-associated ligase) (hTAL) [MASS=83593] | *    | 6.50  | *    | *    | * | 2 | 2 | NRLIQM[147]AYESQRQNLVQQAC[330]SSM[147]AEM[147]DER | 1 |
|                                                                                                                                                                                     |      |       |      |      |   |   | 2 | IRM[147]EQLMSITQEETESLR                           | 1 |
|                                                                                                                                                                                     |      |       |      |      |   |   | 3 | NRLIQM[147]AYESQRQNLVQQAC[339]SSM[147]AEMDER      | 1 |
| LRTM3_HUMAN (Q86VH5) Leucine-rich repeat transmembrane neuronal protein 3 precursor [MASS=65896]                                                                                    | *    | 9.47  | *    | *    | * | 2 | 3 | PTNTETSEMLLNGTGPC[330]TYNK                        | 1 |
|                                                                                                                                                                                     |      |       |      |      |   |   | 3 | SFETNAQEDTMETHLETELDLSTITTAGRISDHK                | 1 |
| LSAMP_HUMAN (Q13449) Limbic system-associated membrane protein precursor (LSAMP) [MASS=37308]                                                                                       | *    | 9.17  | *    | *    | * | 1 | 3 | HSLEYSRLRIQKVDVYDEGSYTC[339]SVQQTQHEPK            | 1 |
| LTBP3_HUMAN (Q9NS15) Latent-transforming growth factor beta-binding protein 3 precursor (LTBP-3) [MASS=139246]                                                                      | *    | 1.00  | *    | *    | * | 1 | 3 | QPC[330]GSNPLPGLTK                                | 1 |
| LTK_HUMAN (P29376) Leukocyte tyrosine kinase receptor precursor (EC 2.7.10.1) (Protein tyrosine kinase 1) [MASS=91653]                                                              | *    | 5.56  | *    | *    | * | 2 | 2 | GVQLWRVPGPGQYLISAYGAAGGKGAK                       | 1 |
|                                                                                                                                                                                     |      |       |      |      |   |   | 2 | GGAAGGGGGWTSRAPSPQAGR                             | 1 |
| LV1E_HUMAN (P01703) Ig lambda chain V-l region NEWM [MASS=10904]                                                                                                                    | 0.00 | 18.45 | 0.55 | 0.00 | 1 | 1 | 2 | VTISC[330]TGSSSNIGAGNHVK                          | 1 |
| LYST_HUMAN (Q99698) Lysosomal-trafficking regulator (Beige homolog) [MASS=429136]                                                                                                   | *    | 1.10  | *    | *    | * | 2 | 3 | GLKWGEYVGSAPSAPVAVVC[339]FSQPHGER                 | 1 |
|                                                                                                                                                                                     |      |       |      |      |   |   | 2 | WIYMLSSVFQKQFYR                                   | 2 |



|                                                                                                                                                                                                               |      |       |      |      |   |    |   |                                       |   |
|---------------------------------------------------------------------------------------------------------------------------------------------------------------------------------------------------------------|------|-------|------|------|---|----|---|---------------------------------------|---|
| LYZL4_HUMAN (Q96KX0) Lysozyme-like protein 4 precursor [MASS=16433]                                                                                                                                           | 0.00 | 26.71 | 0.16 | 0.00 | 1 | 2  | 2 | C[330]HMSC[330]SALLNPNEKTIK           | 1 |
|                                                                                                                                                                                                               |      |       |      |      |   |    | 3 | C[330]HMSC[339]SALLNPNEKTIKC[339]AK   | 1 |
| M2OM_HUMAN (Q02978) Mitochondrial 2-oxoglutarate/malate carrier protein (OGCP) (Solute carrier family 25 member 11) [MASS=33930]                                                                              | 0.65 | 12.78 | 1.57 | 0.09 | 2 | 2  | 2 | QATYTTTTRLGIYTVLFRERLTGADGTPPGFLLK    | 1 |
|                                                                                                                                                                                                               |      |       |      |      |   |    | 2 | GC[339]IPTM[147]AR                    | 2 |
| M3K13_HUMAN (O43283) Mitogen-activated protein kinase kinase kinase 13 (EC 2.7.11.25) (Mixed lineage kinase) (MLK) (Leucine zipper-bearing kinase) [MASS=108295]                                              | 0.00 | 5.18  | 0.88 | 0.00 | 1 | 3  | 1 | HYSSATW                               | 1 |
|                                                                                                                                                                                                               |      |       |      |      |   |    | 3 | ANNLYMELSAIMLQLEM[147]R               | 1 |
|                                                                                                                                                                                                               |      |       |      |      |   |    | 2 | SGSGSGGFLEGLFGC[339]LRPVVNIIGK        | 1 |
| M3K14_HUMAN (Q99558) Mitogen-activated protein kinase kinase kinase 14 (EC 2.7.11.25) (NF-kappa beta-inducing kinase) (Serine/threonine-protein kinase NIK) (HsNIK) [MASS=104041]                             | *    | 4.22  | *    | *    | * | 2  | 3 | LEVFRAEELMAC[339]AGLTSPRIVPLYGAVR     | 1 |
|                                                                                                                                                                                                               |      |       |      |      |   |    | 3 | SSSWNM[147]VLARGR                     | 1 |
|                                                                                                                                                                                                               |      |       |      |      |   |    | 2 | LVSDANEQYK                            | 1 |
|                                                                                                                                                                                                               |      |       |      |      |   |    | 2 | VIAQLEIRQSELESIQEVLGDYR               | 1 |
| MACF1_HUMAN (Q9UPN3) Microtubule-actin crosslinking factor 1, isoforms 1/2/3/5 (Actin cross-linking family protein 7) (Macrophin-1) (Trabeculin-alpha) (620 kDa actin-binding protein) (ABP620) [MASS=620414] | 0.00 | 3.48  | 0.82 | 0.00 | 1 | 10 | 2 | EM[147]FSQLADLDDELDDGMGAIGR           | 1 |
|                                                                                                                                                                                                               |      |       |      |      |   |    | 2 | SKAMLNEVEK                            | 1 |
|                                                                                                                                                                                                               |      |       |      |      |   |    | 3 | ERLEKLEDAMQAAVQYQDTLQAMFDWLDNTVIK     | 1 |
|                                                                                                                                                                                                               |      |       |      |      |   |    | 3 | NDEC[339]VLEDNSQR                     | 1 |
|                                                                                                                                                                                                               |      |       |      |      |   |    | 2 | EFQESFK                               | 1 |
|                                                                                                                                                                                                               |      |       |      |      |   |    | 2 | RVDVNSAVAMGEVILAVC[339]HPDC[330]ITTIK | 1 |
|                                                                                                                                                                                                               |      |       |      |      |   |    | 2 | LM[147]LLSRDDSGSGSKTEQSVALLEQK        | 1 |
|                                                                                                                                                                                                               |      |       |      |      |   |    | 2 | DSVLFVADRLRLEEEVEAC[339]K             | 1 |
| MACF4_HUMAN (Q96PK2) Microtubule-actin crosslinking factor 1, isoform 4 [MASS=670146]                                                                                                                         | *    | 1.01  | *    | *    | * | 3  | 2 | ELQDALALISRLTESR                      | 1 |
|                                                                                                                                                                                                               |      |       |      |      |   |    | 2 | RLISPELANMIQIDSSEFSDDR                | 1 |
|                                                                                                                                                                                                               |      |       |      |      |   |    | 2 | TTVETEDSSVENPEQDLFVEQK                | 1 |
| MAOM_HUMAN (P23368) NAD-dependent malic enzyme, mitochondrial precursor (EC 1.1.1.38) (NAD-ME) (Malic enzyme 2) [MASS=65443]                                                                                  | *    | 8.56  | *    | *    | * | 2  | 2 | EKYC[330]TFNDDIQGTAVALAGLLAAQKVISK    | 1 |
|                                                                                                                                                                                                               |      |       |      |      |   |    | 2 | PDRC[330]LPVC[339]IDVGTDNIALLK        | 1 |
| MAON_HUMAN (Q16798) NADP-dependent malic enzyme, mitochondrial precursor (EC 1.1.1.40) (NADP-ME) (Malic enzyme 3) [MASS=67054]                                                                                | *    | 4.47  | *    | *    | * | 1  | 3 | PRGLFITIHDKGHLATM[147]LNSWPEDNIK      | 1 |
| MAP1A_HUMAN (P78559) Microtubule-associated protein 1A (MAP 1A) (Proliferation-related protein p80) [Contains: MAP1 light chain LC2] [MASS=306529]                                                            | *    | 2.75  | *    | *    | * | 3  | 2 | ELVLSSPEDLTQDFEEM[147]KREER           | 1 |
|                                                                                                                                                                                                               |      |       |      |      |   |    | 2 | PDVC[330]M[147]ADPEGLSSESGRXER        | 1 |
|                                                                                                                                                                                                               |      |       |      |      |   |    | 3 | AIVFEIMEAGEPTGPILGAEALPGGLRTPQEPGK    | 1 |

|                                                                                                                                                                                                                                                                              |   |      |   |   |   |   |                                                                                                                |             |
|------------------------------------------------------------------------------------------------------------------------------------------------------------------------------------------------------------------------------------------------------------------------------|---|------|---|---|---|---|----------------------------------------------------------------------------------------------------------------|-------------|
| MAP2_HUMAN (P11137) Microtubule-associated protein 2 (MAP 2) (MAP-2) [MASS=199538]                                                                                                                                                                                           | * | 4.16 | * | * | * | 3 | 3 DQEPTTDM[147]LKQDSFPVSLEQAVTDSAM[147]TSKTLEK<br>2 VLEEEKEAINQETVQQR<br>3 ESVHESIDTM[147]SPM[147]HKNGDKEFQTGK | 1<br>1<br>1 |
| MARCO_HUMAN (Q9UEW3) Macrophage receptor MARCO (Macrophage receptor with collagenous structure) (Scavenger receptor class A member 2) [MASS=52658]                                                                                                                           | * | 9.23 | * | * | * | 2 | 2 GAMGM[147]PGAPGPPGPPAEK<br>2 DGATGSPSGPQGGPPGVKGEAGLQGGPQGAPGK<br>3 DGATGSPSGPQGGPPGVKGEAGLQGGPQGAPGK        | 1<br>1<br>1 |
| MARK4_HUMAN (Q96L34) MAP/microtubule affinity-regulating kinase 4 (EC 2.7.11.1) (MAP/microtubule affinity-regulating kinase-like 1) [MASS=82519]                                                                                                                             | * | 5.45 | * | * | * | 2 | 2 RKDSTSTPNLPPSM[147]MTR<br>3 VPPASPSHSLAPSGERSRLAR                                                            | 1<br>1      |
| MAST1_HUMAN (Q9Y2H9) Microtubule-associated serine/threonine-protein kinase 1 (EC 2.7.11.1) (Syntrophin-associated serine/threonine-protein kinase) [MASS=170676]                                                                                                            | * | 3.12 | * | * | * | 2 | 3 SRSLSPGRSPSSYDNEIVM[147]M[147]NHVYK<br>2 MYFAETVLALEYLHNYGIVHRDLK                                            | 1<br>1      |
| MAST3_HUMAN (O60307) Microtubule-associated serine/threonine-protein kinase 3 (EC 2.7.11.1) [MASS=143136]                                                                                                                                                                    | * | 5.35 | * | * | * | 3 | 2 ATGTFDNEIVMM[147]NHVYR                                                                                       | 4           |
| MATR3_HUMAN (P43243) Matrin-3 [MASS=94623]                                                                                                                                                                                                                                   | * | 2.60 | * | * | * | 2 | 2 VPKSASVSALSIIITADDGSGGPLMSPLSPR<br>3 LLQDAHERSDSEEVSFIVQLVR                                                  | 1<br>1      |
| MBD1_HUMAN (Q9UIS9) Methyl-CpG-binding domain protein 1 (Methyl-CpG-binding protein MBD1) (Protein containing methyl-CpG-binding domain 1) [MASS=66607]                                                                                                                      | * | 3.64 | * | * | * | 1 | 2 RLLPSVWSESEDGAGSPPPYRR                                                                                       | 1           |
| MCCC2_HUMAN (Q9HCC0) Methylcrotonoyl-CoA carboxylase beta chain, mitochondrial precursor (EC 6.4.1.4) (3-Methylcrotonyl-CoA carboxylase 2) (MCCase subunit beta) (3-methylcrotonyl-CoA:carbon dioxide ligase subunit beta) (3-Methylcrotonyl-CoA carboxylase n) [MASS=61333] | * | 7.82 | * | * | * | 2 | 2 AQEIAMQNR<br>3 DGAKMVAAVAC[330]AQVPKITLIIGGSYGAGNYGMC[339]GR                                                 | 1<br>1      |
| MCLN2_HUMAN (Q8IZK6) Mucolipin-2 [MASS=62684]                                                                                                                                                                                                                                | * | 2.04 | * | * | * | 1 | 3 IGLKVC[330]KQHYK                                                                                             | 3           |

|                                                                                                                                                                                                                                    |      |       |      |      |   |   |             |                                                                                    |             |
|------------------------------------------------------------------------------------------------------------------------------------------------------------------------------------------------------------------------------------|------|-------|------|------|---|---|-------------|------------------------------------------------------------------------------------|-------------|
| MCLN3_HUMAN (Q8TDD5) Mucolin-3<br>[MASS=64247]                                                                                                                                                                                     | 0.00 | 3.80  | 5.74 | 0.00 | 1 | 1 | 3           | C[339]NFNQQTSPSEELLLEDQMRR                                                         | 1           |
| MCM3_HUMAN (P25205) DNA replication<br>licensing factor MCM3 (DNA polymerase alpha<br>holoenzyme-associated protein P1) (RLF<br>subunit beta) (P102 protein) (P1-MCM3)<br>[MASS=90980]                                             | *    | 4.08  | *    | *    | * | 2 | 2<br>2      | EKMVSAAFMKK<br>MSDM[147]DRTAIHEVMEQGRVTIAK                                         | 1<br>1      |
| MCM5_HUMAN (P33992) DNA replication<br>licensing factor MCM5 (CDC46 homolog) (P1-<br>CDC46) [MASS=82285]                                                                                                                           | *    | 0.68  | *    | *    | * | 1 | 1           | YIIMR                                                                              | 1           |
| MCM7_HUMAN (P33993) DNA replication<br>licensing factor MCM7 (CDC47 homolog) (P1.1-<br>MCM3) [MASS=81307]                                                                                                                          | *    | 1.53  | *    | *    | * | 1 | 3           | GSRFIKFQEMK                                                                        | 1           |
| MCPT1_HUMAN (P23946) Chymase precursor<br>(EC 3.4.21.39) (Mast cell protease I)<br>[MASS=27325]                                                                                                                                    | 0.20 | 24.70 | 2.79 | 0.04 | 2 | 4 | 3<br>2<br>2 | LRLM[147]DPQAC[330]SHFR<br>GDSGGPLLC[339]AGVAQGIVSYGR<br>M[147]LLLPLLLLFLLC[339]SR | 1<br>1<br>3 |
| MCR_HUMAN (P08235) Mineralocorticoid<br>receptor (MR) [MASS=107067]                                                                                                                                                                | 0.00 | 2.13  | 0.23 | 0.00 | 1 | 1 | 2           | LMDPQAC[330]SHFR<br>LLDSM[147]HDLVSDLLEFC[330]FYTFR                                | 1<br>1      |
| MDC1_HUMAN (Q14676) Mediator of DNA<br>damage checkpoint protein 1 (Nuclear factor<br>with BRCT domains 1) [MASS=226665]                                                                                                           | *    | 2.44  | *    | *    | * | 2 | 3<br>2      | RGAGNGVVPAGVILER<br>TPEPVVPTAPELQPSTSTDQPVTSEPTSQVTRGRK                            | 1<br>1      |
| MDGA1_HUMAN (Q8NFP4) MAM domain-<br>containing glycosylphosphatidylinositol anchor<br>protein 1 precursor (MAM domain-containing<br>protein 3) (GPI and MAM protein)<br>(Glycosylphosphatidylinositol-MAM) (GPIM)<br>[MASS=105790] | *    | 1.78  | *    | *    | * | 1 | 2           | M[147]EVTC[330]LLLLALIPFHC[339]R                                                   | 1           |
| MDHC_HUMAN (P40925) Malate<br>dehydrogenase, cytoplasmic (EC 1.1.1.37)<br>(Cytosolic malate dehydrogenase)<br>[MASS=36295]                                                                                                         | 0.65 | 2.10  | 0.53 | 0.00 | 1 | 1 | 2           | AIC[330]DHVR                                                                       | 1           |

|                                                                                                                              |      |       |      |      |    |   |  |   |                                              |   |
|------------------------------------------------------------------------------------------------------------------------------|------|-------|------|------|----|---|--|---|----------------------------------------------|---|
|                                                                                                                              |      |       |      |      |    |   |  | 3 | GYLGPEQLPDC[339]LKGC[339]DVVVIPAGVPR         | 1 |
|                                                                                                                              |      |       |      |      |    |   |  | 1 | GYLGPEQLPDC[339]LK                           | 1 |
|                                                                                                                              |      |       |      |      |    |   |  | 2 | EGVVEC[339]SFVK                              | 1 |
|                                                                                                                              |      |       |      |      |    |   |  | 2 | TIIP LISQC[339]TPK                           | 2 |
|                                                                                                                              |      |       |      |      |    |   |  | 2 | SQETEC[339]TYFSTPLLLGK                       | 1 |
|                                                                                                                              |      |       |      |      |    |   |  | 2 | GYLGPEQLPDC[339]LK                           | 2 |
| MDHM_HUMAN (P40926) Malate dehydrogenase, mitochondrial precursor (EC 1.1.1.37) [MASS=35531]                                 | 1.00 | 26.92 | 1.62 | 0.05 | 15 | 6 |  | 2 | GYLGPEQLPDC[330]LK                           | 1 |
|                                                                                                                              |      |       |      |      |    |   |  | 2 | GC[330]DVVVIPAGVPR                           | 2 |
|                                                                                                                              |      |       |      |      |    |   |  | 2 | GC[339]DVVVIPAGVPR                           | 4 |
|                                                                                                                              |      |       |      |      |    |   |  | 1 | GELDQR                                       | 1 |
|                                                                                                                              |      |       |      |      |    |   |  | 3 | C[339]VVSIRDILSWVNF MNKM[147]GEEAALK         | 1 |
|                                                                                                                              |      |       |      |      |    |   |  | 3 | SHDTLVRWYTANC[339]LALVTC[330]MNEEHK          | 1 |
|                                                                                                                              |      |       |      |      |    |   |  | 2 | KM[147]C[330]LTFM[147]KESPLPR                | 1 |
| MDN1_HUMAN (Q9NU22) Midasin (MIDAS-containing protein) [MASS=632816]                                                         | *    | 2.13  | *    | *    | *  | 7 |  | 2 | WYTANC[330]LALVTC[330]MNEEHK                 | 1 |
|                                                                                                                              |      |       |      |      |    |   |  | 2 | SFPLSSPISK                                   | 4 |
|                                                                                                                              |      |       |      |      |    |   |  | 3 | DGQILVYC[339]LNRMSMKTSSWTR                   | 1 |
| MDR1_HUMAN (P08183) Multidrug resistance protein 1 (EC 3.6.3.44) (P-glycoprotein 1) (CD243 antigen) [MASS=141461]            | *    | 2.19  | *    | *    | *  | 2 |  | 3 | GQTLALVGSSGC[339]GK                          | 1 |
|                                                                                                                              |      |       |      |      |    |   |  | 2 | VKEHGTHQQLLAQK                               | 1 |
|                                                                                                                              |      |       |      |      |    |   |  | 3 | QPKTFTVRIVTMDAEM[147]EFNC[330]EMK            | 1 |
|                                                                                                                              |      |       |      |      |    |   |  | 3 | LLAQKAAEAEQEMQR                              | 1 |
| MERL_HUMAN (P35240) Merlin (Moesin-ezrin-radixin-like protein) (Neurofibromin-2) (Schwannomin) (Schwannomerlin) [MASS=69690] | *    | 15.29 | *    | *    | *  | 5 |  | 2 | MAGAIASRMSFSSLKR                             | 1 |
|                                                                                                                              |      |       |      |      |    |   |  | 2 | LLQMKEEATM[147]ANEALMR                       | 1 |
|                                                                                                                              |      |       |      |      |    |   |  | 3 | QPKTFTVRIVTMDAEMEFNC[330]EM[147]K            | 1 |
|                                                                                                                              |      |       |      |      |    |   |  | 2 | TFTVRIVTMDAEMEFNC[330]EM[147]K               | 1 |
| MFN2_HUMAN (O95140) Transmembrane GTPase MFN2 (EC 3.6.5.-) (Mitofusin-2) [MASS=86402]                                        | 0.00 | 5.28  | 0.46 | 0.00 | 1  | 2 |  | 2 | HM[147]AEVNASPLK                             | 1 |
|                                                                                                                              |      |       |      |      |    |   |  | 2 | C[330]STAITNSLQTM[147]QQDM[147]IDGLKPLLPVSVR | 1 |

|                                                                                                                                                                                                                                                                      |      |       |      |      |    |   |   |                                             |   |
|----------------------------------------------------------------------------------------------------------------------------------------------------------------------------------------------------------------------------------------------------------------------|------|-------|------|------|----|---|---|---------------------------------------------|---|
| MFRN1_HUMAN (Q9NYZ2) Mitoferrin-1 (Mitochondrial iron transporter 1) (Solute carrier family 25 member 37) (Mitochondrial solute carrier protein) [MASS=37828]                                                                                                        | 0.00 | 6.92  | 1.50 | 0.00 | 1  | 1 | 2 | GVNVM[147]IMGAGPAHAM[147]YFAC[339]YENMK     | 1 |
|                                                                                                                                                                                                                                                                      |      |       |      |      |    |   | 3 | VEYPIM[147]YSTDPENGHIFNC[330]IQR            | 1 |
|                                                                                                                                                                                                                                                                      |      |       |      |      |    |   | 2 | YKVEYPIM[147]YSTDPENGHIFNC[339]IQR          | 2 |
|                                                                                                                                                                                                                                                                      |      |       |      |      |    |   | 3 | VEYPIM[147]YSTDPENGHIFNC[339]IQR            | 2 |
| MGST3_HUMAN (O14880) Microsomal glutathione S-transferase 3 (EC 2.5.1.18) (Microsomal GST-3) (Microsomal GST-III) [MASS=16516]                                                                                                                                       | 1.00 | 30.26 | 1.56 | 0.04 | 11 | 2 | 2 | VEYPIM[147]YSTDPENGHIFNC[330]IQR            | 1 |
|                                                                                                                                                                                                                                                                      |      |       |      |      |    |   | 3 | YKVEYPIM[147]YSTDPENGHIFNC[330]IQR          | 2 |
|                                                                                                                                                                                                                                                                      |      |       |      |      |    |   | 2 | YKVEYPIM[147]YSTDPENGHIFNC[330]IQR          | 1 |
|                                                                                                                                                                                                                                                                      |      |       |      |      |    |   | 3 | YKVEYPIM[147]YSTDPENGHIFNC[339]IQR          | 3 |
| MIRO1_HUMAN (Q8IXI2) Mitochondrial Rho GTPase 1 (EC 3.6.5.-) (MIRO-1) (hMiro-1) (Ras homolog gene family member T1) (Rac-GTP-binding protein-like protein) [MASS=70784]                                                                                              | *    | 4.53  | *    | *    | *  | 1 | 2 | SSTFWLRASFGATVFAVLGFAM[147]YKALLK           | 1 |
| MK03_HUMAN (P27361) Mitogen-activated protein kinase 3 (EC 2.7.11.24) (Extracellular signal-regulated kinase 1) (ERK-1) (Insulin-stimulated MAP2 kinase) (MAP kinase 1) (MAPK 1) (p44-ERK1) (ERT2) (p44-MAPK) (Microtubule-associated protein 2 kinase) [MASS=43135] | 0.81 | 14.25 | 0.49 | 0.00 | 1  | 2 | 3 | ASTLEAMRDVYIVQDLMETDLYKLLK                  | 1 |
|                                                                                                                                                                                                                                                                      |      |       |      |      |    |   | 3 | HYLDQLNHILGILGSPSQEDLNC[330]IINMK           | 1 |
| MKKS_HUMAN (Q9NPJ1) McKusick-Kaufman/Bardet-Biedl syndromes putative chaperonin (Bardet-Biedl syndrome 6 protein) [MASS=62341]                                                                                                                                       | 0.00 | 10.70 | 1.37 | 0.00 | 1  | 2 | 3 | IGVTLM[147]EPLTKMTGTQPIGSLGSIC[330]PNSYGSVK | 1 |
|                                                                                                                                                                                                                                                                      |      |       |      |      |    |   | 3 | QLISDHVDLVLVC[330]QKVIHPSLKQFLNMHR          | 1 |
| MKLN1_HUMAN (Q9UL63) Muskelin [MASS=84767]                                                                                                                                                                                                                           | *    | 4.76  | *    | *    | *  | 2 | 2 | VFGGMNEENM[147]TELLSSGLKNDYNK               | 1 |
|                                                                                                                                                                                                                                                                      |      |       |      |      |    |   | 3 | LC[330]RPSKDYLLR                            | 2 |

|                                                                                                                                                                                                           |   |       |       |      |      |   |   |                                                 |   |
|-----------------------------------------------------------------------------------------------------------------------------------------------------------------------------------------------------------|---|-------|-------|------|------|---|---|-------------------------------------------------|---|
| MMAH_HUMAN (Q96EY8) Cob(I)yrinic acid a,c-diamide adenosyltransferase, mitochondrial precursor (EC 2.5.1.17) (Cob(I)alamin adenosyltransferase) (Methylmalonic aciduria type B protein) [MASS=27388]      | * | 16.00 | *     | *    | *    | 2 | 3 | AGPILELEQWIDKYTSQLPPLTAFILPSGGK                 | 1 |
|                                                                                                                                                                                                           |   |       |       |      |      |   | 2 | PQPSSKTPR                                       | 1 |
| MMP17_HUMAN (Q9ULZ9) Matrix metalloproteinase-17 precursor (EC 3.4.24.-) (MMP-17) (Membrane-type matrix metalloproteinase 4) (MT-MMP 4) (Membrane-type-4 matrix metalloproteinase) (MT4-MMP) [MASS=67006] |   | 0.00  | 5.28  | 1.78 | 0.00 | 1 | 2 | DWLVC[339]GDSQADGSVAAGVDAAEGPR                  | 1 |
|                                                                                                                                                                                                           |   |       |       |      |      |   | 1 | QAPAPTK                                         | 1 |
| MMSA_HUMAN (Q02252) Methylmalonate-semialdehyde dehydrogenase [acylating], mitochondrial precursor (EC 1.2.1.27) (MMSDH) (Malonate-semialdehyde dehydrogenase [acylating]) (EC 1.2.1.18) [MASS=57839]     |   | 1.00  | 12.34 | 1.26 | 0.06 | 3 | 3 | LLQDSGAPDGTLNIIHGQHEAVNFIC[330]DHPDIK           | 1 |
|                                                                                                                                                                                                           |   |       |       |      |      |   | 2 | AISFVGSNKAGEYIFERGSR                            | 1 |
|                                                                                                                                                                                                           |   |       |       |      |      |   | 3 | LLQDSGAPDGTLNIIHGQHEAVNFIC[339]DHPDIK           | 3 |
|                                                                                                                                                                                                           |   |       |       |      |      |   | 2 | RAFPAWADTSVLSR                                  | 1 |
| MOG_HUMAN (Q16653) Myelin-oligodendrocyte glycoprotein precursor [MASS=28179]                                                                                                                             | * | 17.41 | *     | *    | *    | 2 | 2 | NATGM[147]EVGWYRPPFSRVVHLYR                     | 1 |
|                                                                                                                                                                                                           |   |       |       |      |      |   | 2 | ISPGKNATGMEVGWYRPPFSR                           | 1 |
| MORC2_HUMAN (Q9Y6X9) MORC family CW-type zinc finger 2 (Zinc finger CW-type coiled-coil domain protein 1) [MASS=110724]                                                                                   | * | 3.92  | *     | *    | *    | 2 | 2 | PANTLVKTASR                                     | 1 |
|                                                                                                                                                                                                           |   |       |       |      |      |   | 3 | IEPDTTALSTNHETIDLLVQILRNC[339]LR                | 1 |
| MORC3_HUMAN (Q14149) MORC family CW-type zinc finger 3 (Zinc finger CW-type coiled-coil domain protein 3) [MASS=107112]                                                                                   | * | 5.54  | *     | *    | *    | 3 | 3 | ESVPRRHLESGTNSYATR                              | 1 |
|                                                                                                                                                                                                           |   |       |       |      |      |   | 2 | RQC[330]HM[147]FTDQIKVLQQR                      | 1 |
|                                                                                                                                                                                                           |   |       |       |      |      |   | 2 | ANNM[147]GVGVVGIIEC[330]NFLK                    | 1 |
|                                                                                                                                                                                                           |   |       |       |      |      |   | 2 | VTTQMIAKSLANVEYDTYK                             | 1 |
| MORC4_HUMAN (Q8TE76) MORC family CW-type zinc finger 4 (Zinc finger CW-type coiled-coil domain protein 2) [MASS=106347]                                                                                   | * | 13.23 | *     | *    | *    | 6 | 2 | KAVESWNPVPYVASAAIPAAAIGEK                       | 1 |
|                                                                                                                                                                                                           |   |       |       |      |      |   | 3 | RC[330]SVPEEQELTDEDLC[330]LSK                   | 1 |
|                                                                                                                                                                                                           |   |       |       |      |      |   | 2 | VQHELVIYSTQEAEGLYWSKK                           | 1 |
|                                                                                                                                                                                                           |   |       |       |      |      |   | 2 | YLSNSSSHTR                                      | 1 |
|                                                                                                                                                                                                           |   |       |       |      |      |   | 3 | SC[330]LFTDDGC[339]GM[147]TPHKLHRM[147]LSFGFTDK | 1 |
| MPIP1_HUMAN (P30304) M-phase inducer phosphatase 1 (EC 3.1.3.48) (Dual specificity phosphatase Cdc25A) [MASS=59086]                                                                                       | * | 5.92  | *     | *    | *    | 2 | 2 | IHSLPQKLLGC[330]SPALK                           | 1 |
|                                                                                                                                                                                                           |   |       |       |      |      |   | 3 | SM[147]SGASPKESTNPEK                            | 1 |

|                                                                                                                                                                                                                                                                               |      |      |      |      |   |   |   |                                              |   |
|-------------------------------------------------------------------------------------------------------------------------------------------------------------------------------------------------------------------------------------------------------------------------------|------|------|------|------|---|---|---|----------------------------------------------|---|
| MPRI_HUMAN (P11717) Cation-independent mannose-6-phosphate receptor precursor (CI Man-6-P receptor) (CI-MPR) (M6PR) (Insulin-like growth factor 2 receptor) (Insulin-like growth factor II receptor) (IGF-II receptor) (M6P/IGF2 receptor) (M6P/IGF2R) (300 kD [MASS=274274]) |      |      |      |      |   |   | 3 | DGSPC[339]PSKSGLSYK                          | 1 |
|                                                                                                                                                                                                                                                                               |      |      |      |      |   |   | 3 | TWNLGLSNAKLSYYDGMQLNYR                       | 1 |
|                                                                                                                                                                                                                                                                               |      |      |      |      |   |   | 2 | YASAC[330]QMK                                | 1 |
|                                                                                                                                                                                                                                                                               | *    | 3.41 | *    | *    | * | 7 | 2 | LTYENGLLK                                    | 1 |
|                                                                                                                                                                                                                                                                               |      |      |      |      |   |   | 2 | GTQRPVFLK                                    | 2 |
| MRCKG_HUMAN (Q6DT37) Serine/threonine-protein kinase MRCK gamma (EC 2.7.11.1) (CDC42-binding protein kinase gamma) (Myotonic dystrophy kinase-related CDC42-binding kinase gamma) (Myotonic dystrophy protein kinase-like alpha) (MRCK gamma) (DMPK-like gamma [MASS=172517]) |      |      |      |      |   |   | 3 | LALGTEEGLFVIHLRSNDIFQVGEC[339]R              | 1 |
|                                                                                                                                                                                                                                                                               |      |      |      |      |   |   | 2 | LGRGGLDDFR                                   | 1 |
|                                                                                                                                                                                                                                                                               | *    | 5.80 | *    | *    | * | 5 | 2 | NVGTQTLPAR                                   | 1 |
|                                                                                                                                                                                                                                                                               |      |      |      |      |   |   | 3 | RVQQLTLSPSAGLLVVLG[339]GRGPSVR               | 1 |
|                                                                                                                                                                                                                                                                               |      |      |      |      |   |   | 2 | QSQUALQELAMLREELRAR                          | 1 |
| MRIP_HUMAN (Q6WCQ1) Myosin phosphatase Rho-interacting protein (Rho-interacting protein 3) (M-RIP) (RIP3) (p116Rip) [MASS=116445]                                                                                                                                             | 0.00 | 6.84 | 1.04 | 0.00 | 1 | 3 | 3 | QC[339]QRENQELNAHNQELNNR                     | 1 |
|                                                                                                                                                                                                                                                                               |      |      |      |      |   |   | 3 | EIVSGWLEMLM[147]VYPRTNKQNK                   | 1 |
|                                                                                                                                                                                                                                                                               |      |      |      |      |   |   | 2 | YALDEM[147]PTTLPQGTINM[147]NQC[339]TDVVDGEGR | 1 |
| MSH2_HUMAN (P43246) DNA mismatch repair protein Msh2 (MutS protein homolog 2) [MASS=104742]                                                                                                                                                                                   | 0.00 | 5.14 | *    | *    | * | 2 | 2 | MAVQPKETLQLESAAEVGFVR                        | 1 |
|                                                                                                                                                                                                                                                                               |      |      |      |      |   |   | 3 | KGEMNSAVLPEM[147]ENQVAVSSLSAVIK              | 1 |
| MSRA_HUMAN (Q9UJ68) Peptide methionine sulfoxide reductase (EC 1.8.4.6) (Protein-methionine-S-oxide reductase) (PMSR) (Peptide Met(O) reductase) [MASS=26132]                                                                                                                 | 0.00 | 9.79 | 0.58 | 0.00 | 1 | 2 | 1 | HHVNGNR                                      | 1 |
|                                                                                                                                                                                                                                                                               |      |      |      |      |   |   | 2 | RAC[330]QLLLLHSLFPVPR                        | 1 |
| MTA3_HUMAN (Q9BTC8) Metastasis-associated protein MTA3 [MASS=67503]                                                                                                                                                                                                           | *    | 1.85 | *    | *    | * | 1 | 2 | VWDPNSPLTDR                                  | 1 |
| MTCH1_HUMAN (Q9NZJ7) Mitochondrial carrier homolog 1 (Presenilin-associated protein) [MASS=41544]                                                                                                                                                                             | 0.48 | 6.43 | 0.90 | 0.00 | 1 | 2 | 2 | C[330]M[147]VQFVGR                           | 1 |
|                                                                                                                                                                                                                                                                               |      |      |      |      |   |   | 2 | KVVKETSYEM[147]MM[147]QC[339]VSR             | 1 |
| MTCH2_HUMAN (Q9Y6C9) Mitochondrial carrier homolog 2 (Met-induced mitochondrial protein) [MASS=33331]                                                                                                                                                                         | 0.96 | 6.93 | 1.28 | 0.00 | 1 | 1 | 2 | QVC[339]QLPGLFSYAQHIASIDGR                   | 1 |

|                                                                                                                                                                                                             |      |       |       |      |   |    |   |                                           |                         |   |
|-------------------------------------------------------------------------------------------------------------------------------------------------------------------------------------------------------------|------|-------|-------|------|---|----|---|-------------------------------------------|-------------------------|---|
| MTMR3_HUMAN (Q13615) Myotubularin-related protein 3 (EC 3.1.3.48) (FYVE domain-containing dual specificity protein phosphatase 1) (FYVE-DSP1) (Zinc finger FYVE domain-containing protein 10) [MASS=133618] | 0.00 | 4.01  | 12.62 | 0.04 | 2 | 3  | 3 | VGYGTSQSC[339]SLLPSQVPFETR                | 1                       |   |
|                                                                                                                                                                                                             |      |       |       |      |   |    | 2 | LVQHTYSC[339]LFGTFLC[339]NNAK             | 1                       |   |
|                                                                                                                                                                                                             |      |       |       |      |   |    | 2 | SC[339]LVNSGK                             | 1                       |   |
| MTX2_HUMAN (O75431) Metaxin-2 [MASS=29763]                                                                                                                                                                  | *    | 12.93 | *     | *    | * |    | 2 | MKAIGWGK                                  | 1                       |   |
|                                                                                                                                                                                                             |      |       |       |      |   |    | 3 | AIGWGKTLTDQVLEDVDQC[330]C[330]QALSQR      | 1                       |   |
| MUTYH_HUMAN (Q9UIF7) A/G-specific adenine DNA glycosylase (EC 3.2.2.-) (MutY homolog) (hMYH) [MASS=60069]                                                                                                   | 0.00 | 9.16  | 1.04  | 0.00 | 1 | 3  | 3 | DVAEVTAFRGSLLSWYDQEKR                     | 1                       |   |
|                                                                                                                                                                                                             |      |       |       |      |   |    | 2 | KVFRVYQGQPGTC[339]MGSK                    | 1                       |   |
|                                                                                                                                                                                                             |      |       |       |      |   |    | 2 | KQAASQEGRQK                               | 1                       |   |
|                                                                                                                                                                                                             |      |       |       |      |   |    | 3 | DGLPAHIGSM[147]AQRAYWALLNQRR              | 1                       |   |
|                                                                                                                                                                                                             |      |       |       |      |   |    | 3 | AAAAFAQLQGAMEM[147]LGISESEQR              | 1                       |   |
|                                                                                                                                                                                                             |      |       |       |      |   |    | 3 | TPC[330]GSQASTEILAPKAEK                   | 1                       |   |
|                                                                                                                                                                                                             |      |       |       |      |   |    | 2 | SSIHFEETEEANRSFSLSGIKTILK                 | 1                       |   |
| MY18B_HUMAN (Q8IUG5) Myosin-18B (Myosin XVIIIb) [MASS=285183]                                                                                                                                               | 0.00 | 7.79  | 0.35  | 0.00 | 1 | 10 | 2 | TQFSSC[330]ESLLESRPSMGR                   | 1                       |   |
|                                                                                                                                                                                                             |      |       |       |      |   |    | 2 | FSM[147]VM[147]SLDFNATGR                  | 1                       |   |
|                                                                                                                                                                                                             |      |       |       |      |   |    | 3 | C[330]HHLTC[339]DLEDTC[339]VLLENQQRNHELEK | 1                       |   |
|                                                                                                                                                                                                             |      |       |       |      |   |    | 2 | GDVAC[330]QVLESEARAER                     | 1                       |   |
|                                                                                                                                                                                                             |      |       |       |      |   |    | 2 | TELNLHQMADSSSFMGVWSKPEDK                  | 1                       |   |
|                                                                                                                                                                                                             |      |       |       |      |   |    | 2 | SLFQARAKLPPVC[339]JR                      | 1                       |   |
| MYBB_HUMAN (P10244) Myb-related protein B (B-Myb) [MASS=78764]                                                                                                                                              | *    | 2.57  | *     | *    | * |    | 1 | 2                                         | TVAC[330]GGTRDQLFMQEKAR | 1 |
|                                                                                                                                                                                                             |      |       |       |      |   |    | 3 | SPVRC[339]IATTR                           | 7                       |   |
| MYCB2_HUMAN (O75592) Probable ubiquitin ligase protein MYCBP2 (EC 6.3.2.-) (Myc-binding protein 2) (Protein associated with Myc) (Pam/highwire/rpm-1 protein) [MASS=510165]                                 | *    | 2.15  | *     | *    | * |    | 6 | 2                                         | LISAHSSLSK              | 3 |
|                                                                                                                                                                                                             |      |       |       |      |   |    | 3 | EM[147]IPLDLLLAVPVPGVNIEEHLQLR            | 1                       |   |
|                                                                                                                                                                                                             |      |       |       |      |   |    | 2 | ALMRLEYEGLHK                              | 1                       |   |
|                                                                                                                                                                                                             |      |       |       |      |   |    | 2 | SNNGTDVNAGQIPQLLYR                        | 1                       |   |
|                                                                                                                                                                                                             |      |       |       |      |   |    | 2 | PAM[147]IGSLTDGSTETFWESGDEDKNK            | 1                       |   |



|                                                                                                                                                                                                                               |      |      |      |      |   |   |   |                                        |   |
|-------------------------------------------------------------------------------------------------------------------------------------------------------------------------------------------------------------------------------|------|------|------|------|---|---|---|----------------------------------------|---|
| MYH10_HUMAN (P35580) Myosin-10 (Myosin heavy chain, nonmuscle IIb) (Nonmuscle myosin heavy chain IIb) (NMMHC II-b) (NMMHC-IIb) (Cellular myosin heavy chain, type B) (Nonmuscle myosin heavy chain-B) (NMMHC-B) [MASS=228937] | *    | 2.83 | *    | *    | * | 4 | 2 | GDEVMVELAENGKK                         | 2 |
|                                                                                                                                                                                                                               |      |      |      |      |   |   | 1 | DRAEAEAR                               | 1 |
|                                                                                                                                                                                                                               |      |      |      |      |   |   | 2 | YLFVDRAVIYNPATQADWTAK                  | 1 |
|                                                                                                                                                                                                                               |      |      |      |      |   |   | 2 | LEEKALAYDKLEK                          | 1 |
| MYL4_HUMAN (P12829) Myosin light polypeptide 4 (Myosin light chain 1, embryonic muscle/atrial isoform) (Myosin light chain alkali, GT-1 isoform) [MASS=21433]                                                                 | *    | 9.18 | *    | *    | * | 1 | 3 | MLDFETFLPILQHISRNK                     | 1 |
| MYLK2_HUMAN (Q9H1R3) Myosin light chain kinase 2, skeletal/cardiac muscle (EC 2.7.11.18) (MLCK2) [MASS=64553]                                                                                                                 | *    | 1.85 | *    | *    | * | 1 | 3 | QIC[330]DGILFM[147]HK                  | 1 |
| MYO15_HUMAN (Q9UKN7) Myosin-15 (Myosin XV) (Unconventional myosin-15) [MASS=395172]                                                                                                                                           | *    | 2.41 | *    | *    | * | 3 | 3 | GGPKVVFVGNWSDSDMSTRPQPQEHM[147]PK      | 1 |
|                                                                                                                                                                                                                               |      |      |      |      |   |   | 3 | PDPHEEALMILKGQMTHLAAAPGTQVSREAVLVK     | 1 |
|                                                                                                                                                                                                                               |      |      |      |      |   |   | 2 | AHTVAAKFQQSLLDLVEKMER                  | 1 |
| MYO1C_HUMAN (O00159) Myosin Ic (Myosin I beta) (MMI-beta) (MMIb) [MASS=118038]                                                                                                                                                | *    | 1.95 | *    | *    | * | 1 | 2 | LEDTVKHHPHFLTHKLADQR                   | 1 |
|                                                                                                                                                                                                                               |      |      |      |      |   |   | 3 | FGKYIDIHFNKR                           | 2 |
| MYO7A_HUMAN (Q13402) Myosin-7A (Myosin VIIa) [MASS=254404]                                                                                                                                                                    | 0.00 | 4.11 | 0.74 | 0.00 | 1 | 5 | 2 | NYHVFYC[339]MLEGMSEDQKK                | 1 |
|                                                                                                                                                                                                                               |      |      |      |      |   |   | 2 | QRGDFPTDC[339]VYVM[147]PTVTM[147]PPR   | 1 |
|                                                                                                                                                                                                                               |      |      |      |      |   |   | 3 | PLKQPLLYHDDEGDQLAALAVWITILR            | 1 |
|                                                                                                                                                                                                                               |      |      |      |      |   |   | 3 | EEAKLAFKLIFK                           | 1 |
| MYOM2_HUMAN (P54296) Myomesin-2 (M-protein) (165 kDa titin-associated protein) (165 kDa connectin-associated protein) [MASS=164793]                                                                                           | *    | 3.21 | *    | *    | * | 2 | 2 | SPRYAVFDLM[147]EGKSYVFR                | 1 |
|                                                                                                                                                                                                                               |      |      |      |      |   |   | 3 | DGSLIC[339]QAAEPGKYRIESNYGVHTLEINR     | 1 |
| MYPC2_HUMAN (Q14324) Myosin-binding protein C, fast-type (Fast MyBP-C) (C-protein, skeletal muscle fast-isoform) [MASS=128142]                                                                                                | 0.00 | 5.25 | 0.60 | 0.00 | 1 | 3 | 2 | VYTENIC[339]GLSDSPGVSKNTARILK          | 1 |
|                                                                                                                                                                                                                               |      |      |      |      |   |   | 1 | EDSFK                                  | 1 |
|                                                                                                                                                                                                                               |      |      |      |      |   |   | 3 | ITSVGEDWAILVWEPPMYDGGKPVGTGYLVER       | 1 |
| MYPC3_HUMAN (Q14896) Myosin-binding protein C, cardiac-type (Cardiac MyBP-C) (C-protein, cardiac muscle isoform) [MASS=140761]                                                                                                | 0.00 | 5.02 | 0.72 | 0.00 | 1 | 2 | 3 | HHLIINEAMLEDAGHYALC[330]TSGGQALAEIVQEK | 1 |
|                                                                                                                                                                                                                               |      |      |      |      |   |   | 3 | PLEDQLVMVGQRVEFEC[330]EVSEEGAQVKWLK    | 1 |

|                                                                                                                                                                                                                                                                              |      |       |      |      |    |   |  |   |                                               |   |
|------------------------------------------------------------------------------------------------------------------------------------------------------------------------------------------------------------------------------------------------------------------------------|------|-------|------|------|----|---|--|---|-----------------------------------------------|---|
|                                                                                                                                                                                                                                                                              |      |       |      |      |    |   |  | 2 | VC[339]GSNLLSIC[339]JK                        | 2 |
|                                                                                                                                                                                                                                                                              |      |       |      |      |    |   |  | 2 | VC[330]GSNLLSIC[330]JK                        | 3 |
|                                                                                                                                                                                                                                                                              |      |       |      |      |    |   |  | 2 | TTIC[330]GK                                   | 1 |
|                                                                                                                                                                                                                                                                              |      |       |      |      |    |   |  | 2 | VC[339]HC[339]LGK                             | 2 |
| MYPR_HUMAN (P60201) Myelin proteolipid protein (PLP) (Lipophilin) [MASS=29946]                                                                                                                                                                                               | 1.00 | 22.10 | 1.35 | 0.08 | 13 | 5 |  | 2 | TSASIGSLC[330]ADAR                            | 2 |
|                                                                                                                                                                                                                                                                              |      |       |      |      |    |   |  | 2 | M[147]YGVLPWNAFPGKVC[330]GSNLLSIC[339]JK      | 1 |
|                                                                                                                                                                                                                                                                              |      |       |      |      |    |   |  | 2 | VC[330]HC[330]LGK                             | 1 |
|                                                                                                                                                                                                                                                                              |      |       |      |      |    |   |  | 2 | TSASIGSLC[339]ADAR                            | 3 |
| MYST3_HUMAN (Q92794) Histone acetyltransferase MYST3 (EC 2.3.1.48) (EC 2.3.1.-) (MYST protein 3) (MOZ, YBF2/SAS3, SAS2 and TIP60 protein 3) (Runt-related transcription factor-binding protein 2) (Monocytic leukemia zinc finger protein) (Zinc finger protei [MASS=225054] | 0.00 | 4.19  | 0.72 | 0.00 | 1  | 5 |  | 3 | GM[147]WIC[330]QIC[330]RPR                    | 1 |
|                                                                                                                                                                                                                                                                              |      |       |      |      |    |   |  | 2 | LSSQDVLRC[330]QSSSK                           | 1 |
|                                                                                                                                                                                                                                                                              |      |       |      |      |    |   |  | 3 | YEIHTWYSSYPQEYSRLPK                           | 1 |
|                                                                                                                                                                                                                                                                              |      |       |      |      |    |   |  | 2 | YTNPIGRPK                                     | 1 |
|                                                                                                                                                                                                                                                                              |      |       |      |      |    |   |  | 3 | PEELISC[339]ADC[330]GNSGHPSC[339]LKFSPELTVRVK | 1 |
| MZF1_HUMAN (P28698) Myeloid zinc finger 1 (MZF-1) (Zinc finger protein 42) (Zinc finger and SCAN domain-containing protein 6) [MASS=82036]                                                                                                                                   | 0.00 | 5.18  | 0.23 | 0.00 | 1  | 2 |  | 2 | RIHTGERPYAC[330]PEC[330]GK                    | 1 |
|                                                                                                                                                                                                                                                                              |      |       |      |      |    |   |  | 2 | LRFRC[339]FHYYEATGPQEALAQLR                   | 1 |
| N2DL4_HUMAN (Q8TD07) NKG2D ligand 4 precursor (NKG2D ligand 4) (NKG2DL4) (N2DL-4) (Retinoic acid early transcript 1E) (Lymphocyte effector toxicity activation ligand) (RAE-1-like transcript 4) (RL-4) [MASS=30122]                                                         | *    | 15.59 | *    | *    | *  | 2 |  | 2 | PQIKTSDPSTLQVEMFC[330]QREAER                  | 1 |
|                                                                                                                                                                                                                                                                              |      |       |      |      |    |   |  | 2 | SLSRPGQPWC[339]EAQVFLNK                       | 1 |
| N4BP3_HUMAN (O15049) NEDD4-binding protein 3 (N4BP3) [MASS=60441]                                                                                                                                                                                                            | 0.00 | 4.60  | 0.70 | 0.00 | 1  | 1 |  | 3 | APGTLPEADPSARPEEEARWEVC[330]QK                | 1 |
| NAB1_HUMAN (Q13506) NGFI-A-binding protein 1 (EGR-1-binding protein 1) (Transcriptional regulatory protein p54) [MASS=54401]                                                                                                                                                 | *    | 8.42  | *    | *    | *  | 2 |  | 2 | C[330]AATTC[330]VQSLGQGKSDVVGSLALQSVGESR      | 1 |
|                                                                                                                                                                                                                                                                              |      |       |      |      |    |   |  | 3 | SDLNEVKELLK                                   | 1 |
| NAC2_HUMAN (Q9UPR5) Sodium/calcium exchanger 2 precursor (Na(+)/Ca(2+)-exchange protein 2) [MASS=100367]                                                                                                                                                                     | *    | 1.09  | *    | *    | *  | 1 |  | 2 | LM[147]TGAGNVLR                               | 1 |

|                                                                                                                                                                                                                                                                              |      |      |      |      |   |   |   |                                         |   |
|------------------------------------------------------------------------------------------------------------------------------------------------------------------------------------------------------------------------------------------------------------------------------|------|------|------|------|---|---|---|-----------------------------------------|---|
| NAL12_HUMAN (P59046) NACHT, LRR and PYD-containing protein 12 (PYRIN-containing APAF1-like protein 7) (Monarch-1) (Regulated by nitric oxide) [MASS=120172]                                                                                                                  | *    | 1.23 | *    | *    | * | 1 | 2 | LRVLWLFGMDLNK                           | 1 |
| NALP2_HUMAN (Q9NX02) NACHT, LRR and PYD-containing protein 2 (PYRIN domain and NACHT domain-containing protein 1) (PYRIN-containing APAF1-like protein 2) (Nucleotide-binding site protein 1) [MASS=120515]                                                                  | *    | 1.60 | *    | *    | * | 1 | 3 | GEDPVPTC[330]LTRTGLFLR                  | 1 |
| NALP5_HUMAN (P59047) NACHT, LRR and PYD-containing protein 5 (Mater protein homolog) [MASS=134235]                                                                                                                                                                           | *    | 2.83 | *    | *    | * | 2 | 2 | NAQITPGVQHLWRIVM[147]ANRNLR             | 1 |
| NBN_HUMAN (O60934) Nibrin (Nijmegen breakage syndrome protein 1) (Cell cycle regulatory protein p95) [MASS=84958]                                                                                                                                                            | 0.58 | 7.03 | 0.63 | 0.00 | 1 | 4 | 2 | TSSNNNSM[147]VSNTLAKMR                  | 1 |
|                                                                                                                                                                                                                                                                              |      |      |      |      |   |   | 2 | DEENQEMSSC[330]K                        | 1 |
|                                                                                                                                                                                                                                                                              |      |      |      |      |   |   | 2 | IPNYQLSPTKLPKLSINKSK                    | 1 |
|                                                                                                                                                                                                                                                                              |      |      |      |      |   |   | 1 | KQIFKGG                                 | 1 |
|                                                                                                                                                                                                                                                                              |      |      |      |      |   |   | 2 | FFLC[330]QVAGDAK                        | 1 |
| NCA11_HUMAN (P13591) Neural cell adhesion molecule 1, 140 kDa isoform precursor (N-CAM 140) (NCAM-140) (CD56 antigen) [MASS=93360]                                                                                                                                           | 1.00 | 8.49 | 0.47 | 0.21 | 7 | 4 | 3 | GPVEAKPEC[339]QETETKPAPAEVK             | 1 |
|                                                                                                                                                                                                                                                                              |      |      |      |      |   |   | 2 | KVDKNDDEAEYIC[330]IAENK                 | 2 |
|                                                                                                                                                                                                                                                                              |      |      |      |      |   |   | 3 | C[339]VVTGEDGSESEATVNVKIFQK             | 1 |
|                                                                                                                                                                                                                                                                              |      |      |      |      |   |   | 3 | GPVEAKPEC[330]QETETKPAPAEVK             | 3 |
|                                                                                                                                                                                                                                                                              |      |      |      |      |   |   | 2 | DSTGSLPGSGSTHGTSLKEKHK                  | 1 |
| NCOA2_HUMAN (Q15596) Nuclear receptor coactivator 2 (NCoA-2) (Transcriptional intermediary factor 2) [MASS=159156]                                                                                                                                                           | 0.39 | 5.94 | 0.93 | 0.00 | 1 | 5 | 3 | ILHRLLDSSSPVDLAK                        | 1 |
|                                                                                                                                                                                                                                                                              |      |      |      |      |   |   | 3 | ETNDPNLPPAVSSER                         | 1 |
|                                                                                                                                                                                                                                                                              |      |      |      |      |   |   | 2 | EEGEDLQSC[330]LIC[330]VAR               | 1 |
|                                                                                                                                                                                                                                                                              |      |      |      |      |   |   | 2 | QRQMHQQQVQQRTLML[147]MR                 | 1 |
|                                                                                                                                                                                                                                                                              |      |      |      |      |   |   | 3 | SNSIPGARPVLQQQQM[147]LQM[147]R          | 1 |
| NCOA3_HUMAN (Q9Y6Q9) Nuclear receptor coactivator 3 (EC 2.3.1.48) (NCoA-3) (Thyroid hormone receptor activator molecule 1) (TRAM-1) (ACTR) (Receptor-associated coactivator 3) (RAC-3) (Amplified in breast cancer-1 protein) (AIB-1) (Steroid receptor coacti [MASS=155292] | 0.00 | 5.83 | 0.91 | 0.00 | 1 | 4 | 2 | AM[147]M[147]EEGEDLQSC[330]MIC[330]VARR | 1 |
|                                                                                                                                                                                                                                                                              |      |      |      |      |   |   | 2 | EQGKTISNDDDVQKADVSSSTGGVIDK             | 1 |
|                                                                                                                                                                                                                                                                              |      |      |      |      |   |   | 2 | LPC[330]DTPGQGLTC[330]SGEK              | 1 |

|                                                                                                                                                                                                                                                                               |      |       |      |      |   |   |   |                                        |   |
|-------------------------------------------------------------------------------------------------------------------------------------------------------------------------------------------------------------------------------------------------------------------------------|------|-------|------|------|---|---|---|----------------------------------------|---|
| NCOA6_HUMAN (Q14686) Nuclear receptor coactivator 6 (Amplified in breast cancer protein 3) (Cancer-amplified transcriptional coactivator ASC-2) (Activating signal cointegrator 2) (ASC-2) (Peroxisome proliferator-activated receptor-interacting protein) (P [MASS=219117]) | 0.00 | 0.73  | *    | *    | * | 1 | 3 | M[147]EAGFPM[147]ASGPGIIR              | 1 |
| NCOR1_HUMAN (O75376) Nuclear receptor corepressor 1 (N-CoR1) (N-CoR) [MASS=270208]                                                                                                                                                                                            | *    | 2.66  | *    | *    | * | 3 | 2 | GIIDLTM[147]PPTILVPHPGGTSTPPM[147]DR   | 1 |
|                                                                                                                                                                                                                                                                               |      |       |      |      |   |   | 3 | STLHEAPKAQLSPGIYDDTSAR                 | 1 |
|                                                                                                                                                                                                                                                                               |      |       |      |      |   |   | 1 | RVKFINM[147]NGLMEDPM[147]K             | 1 |
|                                                                                                                                                                                                                                                                               |      |       |      |      |   |   | 3 | C[339]PVM[147]LVVGDQAPHEDAVVEC[339]NSK | 2 |
| NDRG2_HUMAN (Q9UN36) Protein NDRG2 (Protein Syld709613) [MASS=40798]                                                                                                                                                                                                          | 1.00 | 11.86 | 0.64 | 0.25 | 4 | 2 | 2 | SC[330]FQPLFQFEDM[147]QEIIQNFVR        | 1 |
|                                                                                                                                                                                                                                                                               |      |       |      |      |   |   | 3 | C[330]PVM[147]LVVGDQAPHEDAVVEC[330]NSK | 1 |
|                                                                                                                                                                                                                                                                               |      |       |      |      |   |   | 2 | IHLC[339]QR                            | 3 |
| NDUA2_HUMAN (O43678) NADH dehydrogenase [ubiquinone] 1 alpha subcomplex subunit 2 (EC 1.6.5.3) (EC 1.6.99.3) (NADH-ubiquinone oxidoreductase B8 subunit) (Complex I-B8) (CI-B8) [MASS=10790]                                                                                  | 1.00 | 6.12  | 1.88 | 0.02 | 5 | 1 | 2 | IHLC[330]QR                            | 2 |
|                                                                                                                                                                                                                                                                               |      |       |      |      |   |   | 2 | TTGLVGLAVC[339]NTPHER                  | 1 |
| NDUA5_HUMAN (Q16718) NADH dehydrogenase [ubiquinone] 1 alpha subcomplex subunit 5 (EC 1.6.5.3) (EC 1.6.99.3) (NADH-ubiquinone oxidoreductase 13 kDa-B subunit) (Complex I-13Kd-B) (CI-13Kd-B) (Complex I subunit B13) [MASS=13327]                                            | 1.00 | 13.91 | 1.31 | 0.02 | 2 | 1 | 2 | TTGLVGLAVC[330]NTPHER                  | 1 |
|                                                                                                                                                                                                                                                                               |      |       |      |      |   |   | 2 | TTGLVGLAVC[339]NTPHER                  | 1 |
| NDUA7_HUMAN (O95182) NADH dehydrogenase [ubiquinone] 1 alpha subcomplex subunit 7 (EC 1.6.5.3) (EC 1.6.99.3) (NADH-ubiquinone oxidoreductase subunit B14.5a) (Complex I-B14.5a) (CI-B14.5a) [MASS=12420]                                                                      | *    | 13.39 | *    | *    | * | 1 | 2 | NWASGHDLQGKLQLR                        | 1 |
| NDUA8_HUMAN (P51970) NADH dehydrogenase [ubiquinone] 1 alpha subcomplex subunit 8 (EC 1.6.5.3) (EC 1.6.99.3) (NADH-ubiquinone oxidoreductase 19 kDa subunit) (Complex I-19KD) (CI-19KD) (Complex I-PGIV) (CI-PGIV) [MASS=19974]                                               | 1.00 | 24.56 | 1.82 | 0.05 | 5 | 3 | 2 | AAAHHYGAQC[330]DKPNK                   | 1 |
|                                                                                                                                                                                                                                                                               |      |       |      |      |   |   | 3 | AAAHHYGAQC[339]DKPNK                   | 1 |
|                                                                                                                                                                                                                                                                               |      |       |      |      |   |   | 2 | AAAHHYGAQC[339]DKPNK                   | 1 |
|                                                                                                                                                                                                                                                                               |      |       |      |      |   |   | 2 | C[339]LEEGK                            | 1 |
|                                                                                                                                                                                                                                                                               |      |       |      |      |   |   | 3 | AAAHHYGAQC[339]DKPNKEFM[147]LC[339]R   | 1 |

|                                                                                                                                                                                                                                |      |       |      |      |   |   |   |                                                                                                                                           |   |
|--------------------------------------------------------------------------------------------------------------------------------------------------------------------------------------------------------------------------------|------|-------|------|------|---|---|---|-------------------------------------------------------------------------------------------------------------------------------------------|---|
| NDUAA_HUMAN (O95299) NADH dehydrogenase [ubiquinone] 1 alpha subcomplex subunit 10, mitochondrial precursor (EC 1.6.5.3) (EC 1.6.99.3) (NADH-ubiquinone oxidoreductase 42 kDa subunit) (Complex I-42KD) (CI-42KD) [MASS=40750] | 1.00 | 9.01  | 1.12 | 0.10 | 4 | 1 | 3 | HFPEAGIHYPDSTTGDGKPLATDYNGNC[330]SLEK                                                                                                     | 1 |
|                                                                                                                                                                                                                                |      |       |      |      |   |   | 3 | HFPEAGIHYPDSTTGDGKPLATDYNGNC[339]SLEK                                                                                                     | 3 |
| NDUAB_HUMAN (Q86Y39) NADH dehydrogenase [ubiquinone] 1 alpha subcomplex subunit 11 (EC 1.6.5.3) (EC 1.6.99.3) (NADH-ubiquinone oxidoreductase subunit B14.7) (Complex I-B14.7) (CI-B14.7) [MASS=14721]                         | 0.99 | 16.43 | 1.18 | 0.00 | 1 | 1 | 3 | EKPDDPLNYFLGGC[339]AGGLTLGAR                                                                                                              | 1 |
|                                                                                                                                                                                                                                |      |       |      |      |   |   | 2 | DYC[330]AHLIR                                                                                                                             | 3 |
| NDUB7_HUMAN (P17568) NADH dehydrogenase [ubiquinone] 1 beta subcomplex subunit 7 (EC 1.6.5.3) (EC 1.6.99.3) (NADH-ubiquinone oxidoreductase B18 subunit) (Complex I-B18) (CI-B18) (Cell adhesion protein SQM1) [MASS=16271]    | 1.00 | 13.97 | 1.56 | 0.05 | 7 | 2 | 3 | DYC[339]AHLIR                                                                                                                             | 1 |
|                                                                                                                                                                                                                                |      |       |      |      |   |   | 2 | DYC[339]AHLIR                                                                                                                             | 2 |
|                                                                                                                                                                                                                                |      |       |      |      |   |   | 2 | DSFPNFLAC[330]K                                                                                                                           | 1 |
| NDUBA_HUMAN (O96000) NADH dehydrogenase [ubiquinone] 1 beta subcomplex subunit 10 (EC 1.6.5.3) (EC 1.6.99.3) (NADH-ubiquinone oxidoreductase PDSW subunit) (Complex I-PDSW) (CI-PDSW) [MASS=20645]                             | 0.99 | 6.43  | 1.85 | 0.00 | 1 | 1 | 2 | EGQNYQQNC[339]IK                                                                                                                          | 1 |
|                                                                                                                                                                                                                                |      |       |      |      |   |   | 1 | PRASGLLK                                                                                                                                  | 1 |
| NEK4_HUMAN (P51957) Serine/threonine-protein kinase Nek4 (EC 2.7.11.1) (NimA-related protein kinase 4) (Serine/threonine-protein kinase 2) (Serine/threonine-protein kinase NRK2) [MASS=94571]                                 | *    | 2.50  | *    | *    | * | 2 | 2 | PSVRSILRQPYIK                                                                                                                             | 1 |
|                                                                                                                                                                                                                                |      |       |      |      |   |   | 2 | M[147]HAC[339]TASS                                                                                                                        | 1 |
| NEK7_HUMAN (Q8TDX7) Serine/threonine-protein kinase Nek7 (EC 2.7.11.1) (NimA-related protein kinase 7) [MASS=34551]                                                                                                            | 0.00 | 2.65  | 3.22 | 0.00 | 1 | 1 | 3 | DAPTIQQSSPGSSLR                                                                                                                           | 8 |
|                                                                                                                                                                                                                                |      |       |      |      |   |   | 1 | NEUR3_HUMAN (Q9UQ49) Sialidase-3 (EC 3.2.1.18) (Membrane sialidase) (Ganglioside sialidase) (N-acetyl-alpha-neuraminidase 3) [MASS=48252] | * |

|                                                                                                                                                                               |      |      |      |      |   |   |   |                                      |    |
|-------------------------------------------------------------------------------------------------------------------------------------------------------------------------------|------|------|------|------|---|---|---|--------------------------------------|----|
| NFAC1_HUMAN (O95644) Nuclear factor of activated T-cells, cytoplasmic 1 (NFAT transcription complex cytosolic component) (NF-ATc1) (NF-ATc) [MASS=101242]                     | *    | 3.18 | *    | *    | * | 1 | 3 | VEPVGEDLGSPPPPADFAPEDYSSFQHIRK       | 1  |
| NFAC3_HUMAN (Q12968) Nuclear factor of activated T-cells, cytoplasmic 3 (NF-ATc3) (NFATc3) (T cell transcription factor NFAT4) (NF-AT4) (NFATx) [MASS=115593]                 | 0.00 | 5.02 | 0.72 | 0.00 | 1 | 2 | 3 | TSSLPPLDWPLPAHFGQC[330]ELKIEVQPKTHHR | 1  |
|                                                                                                                                                                               |      |      |      |      |   |   | 2 | VLEIPLL PENNM[147]SASIDC[339]AGILK   | 1  |
| NFASC_HUMAN (O94856) Neurofascin precursor [MASS=150026]                                                                                                                      | *    | 1.93 | *    | *    | * | 2 | 3 | QIVENFSPNQTK                         | 1  |
|                                                                                                                                                                               |      |      |      |      |   |   | 3 | GNPAPSFHWTRNSR                       | 1  |
| NFIB_HUMAN (O00712) Nuclear factor 1 B-type (Nuclear factor 1/B) (NF1-B) (NFI-B) (NF-1/B) (CCAAT-box-binding transcription factor) (CTF) (TGGCA-binding protein) [MASS=47442] | 0.22 | 3.33 | 4.27 | 0.00 | 1 | 1 | 2 | HPC[339]C[339]VLSNPDQK GK            | 1  |
|                                                                                                                                                                               |      |      |      |      |   |   | 3 | SYTLDSLGNPSAYR                       | 22 |
| NFM_HUMAN (P07197) Neurofilament triplet M protein (160 kDa neurofilament protein) (Neurofilament medium polypeptide) (NF-M) (Neurofilament 3) [MASS=102316]                  | *    | 1.53 | *    | *    | * | 1 |   |                                      |    |
| NGL1_HUMAN (Q9HCJ2) Netrin-G1 ligand precursor (NGL-1) (Leucine-rich repeat-containing protein 4C) [MASS=71949]                                                               | 0.00 | 4.38 | 3.89 | 0.00 | 1 | 2 | 3 | LSYISEGAFEGLSNLR                     | 1  |
|                                                                                                                                                                               |      |      |      |      |   |   | 2 | DMAPSNTAC[339]C[339]AR               | 1  |

|                                                                                                                                                                                               |      |       |      |      |   |   |   |                                         |   |
|-----------------------------------------------------------------------------------------------------------------------------------------------------------------------------------------------|------|-------|------|------|---|---|---|-----------------------------------------|---|
| NGN2_HUMAN (Q9H2A3) Neurogenin 2<br>[MASS=28621]                                                                                                                                              | 0.00 | 5.15  | 0.53 | 0.00 | 1 | 1 | 2 | GGVAAGAEGC[330]RPAR                     | 1 |
| NIPM_HUMAN (O43920) NADH-ubiquinone<br>oxidoreductase 15 kDa subunit (EC 1.6.5.3)<br>(EC 1.6.99.3) (Complex I-15 kDa) (CI-15 kDa)<br>[MASS=12386]                                             | 0.99 | 11.43 | 3.75 | 0.00 | 1 | 1 | 2 | IEYDDFVEC[339]LLR                       | 1 |
| NIPS1_HUMAN (Q9BPW8) Protein NipSnap1<br>[MASS=33310]                                                                                                                                         | 0.94 | 4.93  | 1.63 | 0.01 | 2 | 1 | 2 | FSGGYPALM[147]DC[339]M[147]NK           | 2 |
| NIPS2_HUMAN (O75323) Protein NipSnap2<br>(Glioblastoma amplified sequence)<br>[MASS=33742]                                                                                                    | 1.00 | 5.59  | 1.49 | 0.03 | 3 | 1 | 2 | LQFHNVKPEC[339]LEAYNK                   | 2 |
|                                                                                                                                                                                               |      |       |      |      |   |   | 3 | LQFHNVKPEC[339]LEAYNK                   | 1 |
|                                                                                                                                                                                               |      |       |      |      |   |   | 2 | PTTKSSTNTSLPDDNGAWKSSK                  | 1 |
|                                                                                                                                                                                               |      |       |      |      |   |   | 1 | SYNRRSR                                 | 1 |
| NKTR_HUMAN (P30414) NK-tumor recognition<br>protein (Natural-killer cells cyclophilin-related<br>protein) (NK-TR protein) [MASS=165675]                                                       | 0.00 | 5.27  | 0.90 | 0.00 | 1 | 5 | 1 | VLTTVPEMK                               | 1 |
|                                                                                                                                                                                               |      |       |      |      |   |   | 2 | EPVGRIMFQLFSDIC[330]PK                  | 2 |
|                                                                                                                                                                                               |      |       |      |      |   |   | 3 | TDAASRPYADVVRIDC[330]GVLATK             | 1 |
| NKX22_HUMAN (O95096) Homeobox protein<br>Nkx-2.2 (Homeobox protein NK-2 homolog B)<br>[MASS=30132]                                                                                            | *    | 4.03  | *    | *    | * | 1 | 1 | ETPGGGGDAGK                             | 2 |
|                                                                                                                                                                                               |      |       |      |      |   |   | 2 | KTC[339]DALQAK                          | 1 |
|                                                                                                                                                                                               |      |       |      |      |   |   | 2 | EANSIIITPGYGLC[339]AAK                  | 1 |
| NNTM_HUMAN (Q13423) NAD(P)<br>transhydrogenase, mitochondrial precursor (EC<br>1.6.1.2) (Pyridine nucleotide transhydrogenase)<br>(Nicotinamide nucleotide transhydrogenase)<br>[MASS=113895] | 1.00 | 6.17  | 0.98 | 0.16 | 5 | 4 | 3 | PNTAM[147]LLGDAKKTC[339]DALQAK          | 1 |
|                                                                                                                                                                                               |      |       |      |      |   |   | 2 | EANSIIITPGYGLC[330]AAK                  | 2 |
|                                                                                                                                                                                               |      |       |      |      |   |   | 2 | KTC[330]DALQAK                          | 1 |
|                                                                                                                                                                                               |      |       |      |      |   |   | 2 | LFAQQC[339]KEVDILISTALIPGK              | 1 |
| NOL11_HUMAN (Q9H8H0) Nucleolar protein<br>11 [MASS=81123]                                                                                                                                     | 0.00 | 4.59  | 0.67 | 0.00 | 1 | 1 | 3 | HSQDPGTHVVS HFVNWETPQGC[330]GLGFQNSEQSR | 1 |
|                                                                                                                                                                                               |      |       |      |      |   |   | 3 | EEGTPWNEDC[330]GK                       | 3 |
| NOL8_HUMAN (Q76FK4) Nucleolar protein 8<br>(Nucleolar protein Nop132) [MASS=131616]                                                                                                           | 0.00 | 6.60  | 0.11 | 0.00 | 1 | 4 | 2 | GRQC[330]IRPAEIVASLLEGEENTC[339]GK      | 1 |
|                                                                                                                                                                                               |      |       |      |      |   |   | 2 | EENLQRRTQPSINESESDPFVVRDDFK             | 1 |
|                                                                                                                                                                                               |      |       |      |      |   |   | 2 | LM[147]DLQSHFGTDDR                      | 1 |
| NOTC3_HUMAN (Q9UM47) Neurogenic locus<br>notch homolog protein 3 precursor (Notch 3)<br>[Contains: Notch 3 extracellular truncation;<br>Notch 3 intracellular domain] [MASS=243659]           | *    | 1.08  | *    | *    | * | 1 | 2 | LAVEGMVEELIASHADVNAVDELGK               | 1 |

|                                                                                                                                                                                                                                    |      |       |      |      |   |   |   |                                         |   |
|------------------------------------------------------------------------------------------------------------------------------------------------------------------------------------------------------------------------------------|------|-------|------|------|---|---|---|-----------------------------------------|---|
| NOTC4_HUMAN (Q99466) Neurogenic locus notch homolog protein 4 precursor (Notch 4) (hNotch4) [Contains: Notch 4 extracellular truncation; Notch 4 intracellular domain] [MASS=209621]                                               | *    | 0.55  | *    | *    | * | 1 |   |                                         |   |
| NPFF2_HUMAN (Q9Y5X5) Neuropeptide FF receptor 2 (Neuropeptide G-protein coupled receptor) (G-protein coupled receptor 74) (G-protein coupled receptor HLWAR77) [MASS=60270]                                                        | *    | 3.26  | *    | *    | * | 1 | 3 | TSPVYWC[330]REDWPNQEMR                  | 1 |
| NPTN_HUMAN (Q9Y639) Neuroplastin precursor (Stromal cell-derived receptor 1) (SDR-1) [MASS=31291]                                                                                                                                  | 1.00 | 11.70 | 0.63 | 0.19 | 6 | 2 | 2 | SENKNEGQDATM[147]YC[339]K               | 1 |
|                                                                                                                                                                                                                                    |      |       |      |      |   |   | 2 | AEDSGEYHC[339]VYHFVSAPK                 | 1 |
|                                                                                                                                                                                                                                    |      |       |      |      |   |   | 2 | AEDSGEYHC[330]VYHFVSAPK                 | 4 |
| NR1H4_HUMAN (Q96R11) Bile acid receptor (Farnesoid X-activated receptor) (Farnesol receptor HRR-1) (Retinoid X receptor-interacting protein 14) (RXR-interacting protein 14) [MASS=55914]                                          | 0.00 | 9.88  | 1.34 | 0.00 | 1 | 2 | 3 | C[339]KEMGMLAEC[330]MYTGLLTEIQC[339]KSK | 1 |
|                                                                                                                                                                                                                                    |      |       |      |      |   |   | 3 | LC[330]KIHQPENPQHAC[330]LLGRLTELR       | 1 |
|                                                                                                                                                                                                                                    |      |       |      |      |   |   | 3 | C[330]KEMGMLAEC[339]MYTGLLTEIQC[339]KSK | 1 |
| NRG2_HUMAN (O14511) Pro-neuregulin-2, membrane-bound isoform precursor (Pro-NRG2) [Contains: Neuregulin-2 (NRG-2) (Neural- and thymus-derived activator for ERBB kinases) (NTAK) (Divergent of neuregulin-1) (DON-1)] [MASS=91678] | *    | 7.18  | *    | *    | * | 4 | 3 | VALVKVLDKWPLR                           | 1 |
|                                                                                                                                                                                                                                    |      |       |      |      |   |   | 2 | MRQVC[330]C[339]SALPPPPLEK              | 1 |
|                                                                                                                                                                                                                                    |      |       |      |      |   |   | 2 | VLITIGIC[339]VALLVVGIVC[339]VVAYC[330]K | 1 |
|                                                                                                                                                                                                                                    |      |       |      |      |   |   | 1 | PQQQPQPR                                | 1 |
| NRIP1_HUMAN (P48552) Nuclear receptor-interacting protein 1 (Nuclear factor RIP140) (Receptor-interacting protein 140) [MASS=126941]                                                                                               | *    | 6.99  | *    | *    | * | 4 | 3 | TSVIESPSTNRTTPVSTPPLTSSK                | 1 |
|                                                                                                                                                                                                                                    |      |       |      |      |   |   | 3 | EALLAGMVDSVPKGGK                        | 1 |
|                                                                                                                                                                                                                                    |      |       |      |      |   |   | 2 | SAPFLGMAPAVQRSAPALPVSEDFK               | 1 |
|                                                                                                                                                                                                                                    |      |       |      |      |   |   | 1 | QSLKEQGYALSHDSLK                        | 1 |



|                                                                                                                                                                                        |      |       |      |      |   |   |   |                                               |   |
|----------------------------------------------------------------------------------------------------------------------------------------------------------------------------------------|------|-------|------|------|---|---|---|-----------------------------------------------|---|
| NRP2_HUMAN (O60462) Neuropilin-2 precursor (Vascular endothelial cell growth factor 165 receptor 2) [MASS=104830]                                                                      | *    | 3.01  | *    | *    | * | 1 | 2 | FLTMLTAIATQGAISRETQNGYVVKSYK                  | 1 |
| NSF_HUMAN (P46459) Vesicle-fusing ATPase (EC 3.6.4.6) (Vesicular-fusion protein NSF) (N-ethylmaleimide sensitive fusion protein) (NEM-sensitive fusion protein) [MASS=82654]           | 1.00 | 2.96  | 0.86 | 0.14 | 4 | 2 | 2 | GILLYGPPGC[330]GK                             | 1 |
|                                                                                                                                                                                        |      |       |      |      |   |   | 2 | GILLYGPPGC[339]GK                             | 3 |
|                                                                                                                                                                                        |      |       |      |      |   |   | 2 | LLIIGTTSRK                                    | 1 |
| NSG1_HUMAN (P42857) Neuron-specific protein family member 1 (Brain neuron cytoplasmic protein 1) (D4S234) [MASS=20913]                                                                 | 0.00 | 25.95 | 0.35 | 0.00 | 1 | 2 | 2 | SVSPWM[147]SVLSEEKLSAQETEAEEKSA               | 1 |
|                                                                                                                                                                                        |      |       |      |      |   |   | 2 | VSVLVLFALAF LTC[330]VVFLVVK                   | 1 |
| NTRK2_HUMAN (Q16620) BDNF/NT-3 growth factors receptor precursor (EC 2.7.10.1) (Neurotrophic tyrosine kinase receptor type 2) (TrkB tyrosine kinase) (GP145-TrkB) (Trk-B) [MASS=91998] | *    | 13.02 | *    | *    | * | 4 | 3 | EHL SVYAVVVIASVVGFC[339]LLVM[147]LFLLKLAR     | 1 |
|                                                                                                                                                                                        |      |       |      |      |   |   | 3 | HLDLSELILVGNPFTC[339]SC[330]DIM[147]WIKTLQEAK | 1 |
|                                                                                                                                                                                        |      |       |      |      |   |   | 3 | IPVIENPQYFGITNSQLKPDTFVQHIKR                  | 1 |
|                                                                                                                                                                                        |      |       |      |      |   |   | 2 | NC[330]LVGENLLVKIGDFGMSR                      | 1 |
| NU205_HUMAN (Q92621) Nuclear pore complex protein Nup205 (Nucleoporin Nup205) (205 kDa nucleoporin) [MASS=227919]                                                                      | 0.00 | 3.23  | 0.51 | 0.00 | 1 | 4 | 2 | MIHMSMQM[147]GNEPPISLR                        | 1 |
|                                                                                                                                                                                        |      |       |      |      |   |   | 2 | RVHNLITDFLALM[147]PM[147]K                    | 1 |
|                                                                                                                                                                                        |      |       |      |      |   |   | 2 | LQNVEQLPPDEIK                                 | 1 |
|                                                                                                                                                                                        |      |       |      |      |   |   | 2 | ENIAIIESYGAALM[147]EVVC[330]R                 | 1 |
| NU3M_HUMAN (P03897) NADH-ubiquinone oxidoreductase chain 3 (EC 1.6.5.3) (NADH dehydrogenase subunit 3) [MASS=13186]                                                                    | 0.99 | 13.04 | 1.26 | 0.00 | 1 | 1 | 2 | STPYEC[339]GFDPM[147]SPAR                     | 1 |

|                                                                                                                                                                                                   |      |       |      |      |    |   |  |   |                                            |   |
|---------------------------------------------------------------------------------------------------------------------------------------------------------------------------------------------------|------|-------|------|------|----|---|--|---|--------------------------------------------|---|
|                                                                                                                                                                                                   |      |       |      |      |    |   |  | 2 | C[330]IQC[330]TR                           | 1 |
|                                                                                                                                                                                                   |      |       |      |      |    |   |  | 2 | DC[339]FIIYQGHGHDVGAPIADVILPGAAYTEK        | 2 |
|                                                                                                                                                                                                   |      |       |      |      |    |   |  | 2 | VLFLLGADGGC[339]ITR                        | 1 |
|                                                                                                                                                                                                   |      |       |      |      |    |   |  | 2 | M[147]C[339]LVEIEKAPKVVAAC[330]AMPVM[147]K | 1 |
|                                                                                                                                                                                                   |      |       |      |      |    |   |  | 3 | DC[339]FIIYQGHGHDVGAPIADVILPGAAYTEK        | 5 |
| NUAM_HUMAN (P28331) NADH-ubiquinone oxidoreductase 75 kDa subunit, mitochondrial precursor (EC 1.6.5.3) (EC 1.6.99.3) (Complex I-75Kd) (CI-75Kd) [MASS=79467]                                     | 1.00 | 12.24 | 1.23 | 0.14 | 16 | 6 |  |   |                                            |   |
|                                                                                                                                                                                                   |      |       |      |      |    |   |  | 2 | FC[339]YHER                                | 2 |
|                                                                                                                                                                                                   |      |       |      |      |    |   |  | 2 | VVAAC[339]AM[147]PVM[147]K                 | 3 |
|                                                                                                                                                                                                   |      |       |      |      |    |   |  | 2 | VVAAC[330]AM[147]PVM[147]K                 | 2 |
|                                                                                                                                                                                                   |      |       |      |      |    |   |  | 2 | FC[330]YHER                                | 1 |
|                                                                                                                                                                                                   |      |       |      |      |    |   |  | 2 | HESC[339]GQC[339]TPC[339]R                 | 3 |
|                                                                                                                                                                                                   |      |       |      |      |    |   |  | 2 | GAGAYIC[339]GEETALIESIEGK                  | 1 |
|                                                                                                                                                                                                   |      |       |      |      |    |   |  | 2 | NAC[339]GSGYDFDFVVR                        | 2 |
| NUBM_HUMAN (P49821) NADH-ubiquinone oxidoreductase 51 kDa subunit, mitochondrial precursor (EC 1.6.5.3) (EC 1.6.99.3) (Complex I-51KD) (CI-51KD) (NADH dehydrogenase flavoprotein 1) [MASS=50817] | 1.00 | 33.62 | 1.54 | 0.05 | 14 | 9 |  |   |                                            |   |
|                                                                                                                                                                                                   |      |       |      |      |    |   |  | 2 | YLVVNADEGEPGTC[339]K                       | 1 |
|                                                                                                                                                                                                   |      |       |      |      |    |   |  | 3 | HESC[339]GQC[339]TPC[339]R                 | 1 |
|                                                                                                                                                                                                   |      |       |      |      |    |   |  | 3 | LFNISGHVNHPC[339]TVEEEM[147]SVPLK          | 1 |
|                                                                                                                                                                                                   |      |       |      |      |    |   |  | 3 | LIEFYKHESC[339]GQC[339]TPC[339]R           | 3 |
|                                                                                                                                                                                                   |      |       |      |      |    |   |  | 2 | EAYEAGLIGK                                 | 1 |
|                                                                                                                                                                                                   |      |       |      |      |    |   |  | 3 | LFNISGHVNHPC[339]TVEEEM[147]SVPLKELIEK     | 2 |
|                                                                                                                                                                                                   |      |       |      |      |    |   |  | 2 | NAC[330]GSGYDFDFVVR                        | 1 |
|                                                                                                                                                                                                   |      |       |      |      |    |   |  | 2 | YLVVNADEGEPGTC[339]KDR                     | 1 |
| NUCM_HUMAN (O75306) NADH-ubiquinone oxidoreductase 49 kDa subunit, mitochondrial precursor (EC 1.6.5.3) (EC 1.6.99.3) (Complex I-49KD) (CI-49KD) [MASS=52545]                                     | 0.97 | 1.73  | 1.06 | 0.00 | 1  | 1 |  |   |                                            |   |
|                                                                                                                                                                                                   |      |       |      |      |    |   |  | 2 | IIAQC[339]LNK                              | 1 |

|                                                                                                                                                                                                  |      |       |      |      |    |   |   |                                                     |   |
|--------------------------------------------------------------------------------------------------------------------------------------------------------------------------------------------------|------|-------|------|------|----|---|---|-----------------------------------------------------|---|
| NUD15_HUMAN (Q9NV35) Probable 7,8-dihydro-8-oxoguanine triphosphatase NUDT15 (EC 3.1.6.-) (8-oxo-dGTPase NUDT15) (Nucleoside diphosphate-linked moiety X motif 15) (Nudix motif 15) [MASS=18609] | *    | 7.93  | *    | *    | *  | 1 | 2 | PGVGVGVVVVTSK[339]K                                 | 1 |
| NUHM_HUMAN (P19404) NADH-ubiquinone oxidoreductase 24 kDa subunit, mitochondrial precursor (EC 1.6.5.3) (EC 1.6.99.3) [MASS=27391]                                                               | 1.00 | 5.62  | 1.53 | 0.05 | 4  | 1 | 2 | YHIQVC[339]TTTPC[339]M[147]LR                       | 3 |
|                                                                                                                                                                                                  |      |       |      |      |    |   | 3 | YHIQVC[339]TTTPC[339]M[147]LR                       | 1 |
| NUIM_HUMAN (O00217) NADH-ubiquinone oxidoreductase 23 kDa subunit, mitochondrial precursor (EC 1.6.5.3) (EC 1.6.99.3) (Complex I-23KD) (CI-23KD) (TYKY subunit) [MASS=23705]                     | 0.00 | 2.38  | 2.73 | 0.00 | 1  | 1 | 2 | C[339]IAC[339]K                                     | 1 |
| NUKM_HUMAN (O75251) NADH-ubiquinone oxidoreductase 20 kDa subunit, mitochondrial precursor (EC 1.6.5.3) (EC 1.6.99.3) (Complex I-20KD) (CI-20KD) (PSST subunit) [MASS=23563]                     | 0.95 | 26.76 | 1.25 | 0.00 | 1  | 2 | 3 | IVPVDIYIPGC[339]PPTAEALLYGILQLQR                    | 1 |
|                                                                                                                                                                                                  |      |       |      |      |    |   | 3 | RSSLWPMTFGLAC[339]C[339]AVEMMHM[147]AAPRYDM[147]DR  | 1 |
|                                                                                                                                                                                                  |      |       |      |      |    |   | 2 | VIAC[339]DGGGGALGHPK                                | 6 |
| NUMM_HUMAN (O75380) NADH-ubiquinone oxidoreductase 13 kDa-A subunit, mitochondrial precursor (EC 1.6.5.3) (EC 1.6.99.3) (Complex I-13KD-A) (CI-13KD-A) [MASS=13712]                              | 1.00 | 12.10 | 1.31 | 0.04 | 15 | 1 | 3 | VIAC[339]DGGGGALGHPK                                | 3 |
|                                                                                                                                                                                                  |      |       |      |      |    |   | 2 | VIAC[330]DGGGGALGHPK                                | 4 |
|                                                                                                                                                                                                  |      |       |      |      |    |   | 3 | VIAC[330]DGGGGALGHPK                                | 2 |
| O11G2_HUMAN (Q8NGC1) Olfactory receptor 11G2 [MASS=34933]                                                                                                                                        | 0.00 | 5.79  | 2.43 | 0.00 | 1  | 1 | 2 | IIDHFLC[339]DPAPLLTLTC[339]K                        | 1 |
| O2T35_HUMAN (Q8NGX2) Olfactory receptor 2T35 (Olfactory receptor OR1-66) [MASS=36101]                                                                                                            | 0.00 | 16.10 | 0.59 | 0.00 | 1  | 2 | 3 | VC[339]LFM[147]VGSWVGGSLDGFDM[147]LTPVTMSFPFC[339]R | 1 |
|                                                                                                                                                                                                  |      |       |      |      |    |   | 3 | VVSIFYTILTPM[147]LNPLIYSLR                          | 1 |

|                                                                                                                                                                                                                                                                             |                                 |      |       |      |      |   |   |                                                        |   |
|-----------------------------------------------------------------------------------------------------------------------------------------------------------------------------------------------------------------------------------------------------------------------------|---------------------------------|------|-------|------|------|---|---|--------------------------------------------------------|---|
| O51V1_HUMAN (Q9H2C8) Olfactory receptor 51V1 (Odorant receptor HOR3'beta1) (Olfactory receptor OR11-36) [MASS=36882]                                                                                                                                                        | *                               | 9.35 | *     | *    | *    | 1 | 3 | FNSYYALM[147]LVIC[339]ILLLDAILILFSYILILK               | 1 |
| ODP2_HUMAN (P10515) Dihydrolipoalysine-residue acetyltransferase component of pyruvate dehydrogenase complex, mitochondrial precursor (EC 2.3.1.12) (Pyruvate dehydrogenase complex E2 subunit) (PDCE2) (E2) (Dihydrolipoamide S-acetyltransferase component) [MASS=65781]  |                                 | 0.60 | 4.89  | 1.45 | 0.00 | 1 | 1 | 3 NFSAIINPPQAC[330]ILAIGASEDKLVPADNEK                  | 1 |
| ODPAT_HUMAN (P29803) Pyruvate dehydrogenase E1 component alpha subunit, testis-specific form, mitochondrial precursor (EC 1.2.4.1) (PDHE1-A type II) [MASS=42933]                                                                                                           | *                               | 3.61 | *     | *    | *    | 1 | 2 | YHGHSM[147]SDPGVSYR                                    | 1 |
| ODPA_HUMAN (P08559) Pyruvate dehydrogenase E1 component alpha subunit, somatic form, mitochondrial precursor (EC 1.2.4.1) (PDHE1-A type I) [MASS=43295]                                                                                                                     |                                 | 1.00 | 21.28 | 1.54 | 0.04 | 6 | 5 | 3 GGSM[147]HM[147]YAKNFYGGNGIVGAQVPLGAGIALAC[330]KYNGK | 1 |
|                                                                                                                                                                                                                                                                             | 2 KC[339]DLHR                   |      |       |      |      |   |   | 1                                                      |   |
|                                                                                                                                                                                                                                                                             | 2 C[339]DLHR                    |      |       |      |      |   |   | 2                                                      |   |
|                                                                                                                                                                                                                                                                             | 2 NFYGGNGIVGAQVPLGAGIALAC[339]K |      |       |      |      |   |   | 1                                                      |   |
|                                                                                                                                                                                                                                                                             | 2 C[330]DLHR                    |      |       |      |      |   |   | 1                                                      |   |
| 2 LPC[339]IFIC[339]ENNR                                                                                                                                                                                                                                                     | 1                               |      |       |      |      |   |   |                                                        |   |
| ODPB_HUMAN (P11177) Pyruvate dehydrogenase E1 component subunit beta, mitochondrial precursor (EC 1.2.4.1) (PDHE1-B) [MASS=39219]                                                                                                                                           | *                               | 7.52 | *     | *    | *    | 1 | 3 | EGVEC[339]EVINM[147]RTIRPMDMETIEASVMK                  | 1 |
| ODPX_HUMAN (O00330) Pyruvate dehydrogenase protein X component, mitochondrial precursor (Dihydrolipoamide dehydrogenase-binding protein of pyruvate dehydrogenase complex) (Lipoyl-containing pyruvate dehydrogenase complex component X) (E3-binding protein) [MASS=54122] | *                               | 5.59 | *     | *    | *    | 1 | 2 | PVIPPVSTPGQPNAVGTTFTEIPASNIRR                          | 1 |

|                                                                                                                                                                                                                                                                             |                         |      |      |      |    |   |   |                                                 |   |
|-----------------------------------------------------------------------------------------------------------------------------------------------------------------------------------------------------------------------------------------------------------------------------|-------------------------|------|------|------|----|---|---|-------------------------------------------------|---|
| OGT1_HUMAN (O15294) UDP-N-acetylglucosamine--peptide N-acetylglucosaminyltransferase 110 kDa subunit (EC 2.4.1.-) (O-GlcNAc transferase p110 subunit) [MASS=116924]                                                                                                         | 0.00                    | 6.98 | 0.31 | 0.00 | 1  | 4 | 2 | QYTMELERLYLQM[147]WEHYAAGNK                     | 1 |
|                                                                                                                                                                                                                                                                             |                         |      |      |      |    |   | 2 | IHQDGIHILVNM[147]NGYTKGARNELFALR                | 1 |
|                                                                                                                                                                                                                                                                             |                         |      |      |      |    |   | 2 | LC[330]PTHADSLNLANIKR                           | 1 |
|                                                                                                                                                                                                                                                                             |                         |      |      |      |    |   | 2 | KAVIDFK                                         | 1 |
| OMD_HUMAN (Q99983) Osteomodulin precursor (Osteoadherin) (OSAD) (Keratan sulfate proteoglycan osteomodulin) (KSPG osteomodulin) [MASS=49492]                                                                                                                                | *                       | 5.94 | *    | *    | *  | 1 | 3 | LKEPISSYIFFC[330]FPHIHTIYYGEQR                  | 1 |
|                                                                                                                                                                                                                                                                             |                         |      |      |      |    |   | 3 | TQEQC[330]VHNETKNELEK                           | 1 |
|                                                                                                                                                                                                                                                                             |                         |      |      |      |    |   | 2 | TQEQC[339]VHNETKNELEK                           | 2 |
| OPA1_HUMAN (O60313) Dynamin-like 120 kDa protein, mitochondrial precursor (Optic atrophy 1 gene protein) [MASS=111657]                                                                                                                                                      | 1.00                    | 9.58 | 1.31 | 0.03 | 10 | 5 | 2 | TALNHC[339]NLC[339]R                            | 3 |
|                                                                                                                                                                                                                                                                             |                         |      |      |      |    |   | 3 | TQEQC[339]VHNETKNELEK                           | 1 |
|                                                                                                                                                                                                                                                                             |                         |      |      |      |    |   | 3 | VVVVDQSAGKTSVLEMIAQARIFPR                       | 1 |
|                                                                                                                                                                                                                                                                             |                         |      |      |      |    |   | 3 | VVVVDQSAGKTSVLEMIAQAR                           | 1 |
|                                                                                                                                                                                                                                                                             |                         |      |      |      |    |   | 3 | C[339]NEEHPAYLASDEITTVR                         | 1 |
| 2                                                                                                                                                                                                                                                                           | C[339]NEEHPAYLASDEITTVR | 1    |      |      |    |   |   |                                                 |   |
| 2                                                                                                                                                                                                                                                                           | TALNHC[330]NLC[330]R    | 1    |      |      |    |   |   |                                                 |   |
| OPCM_HUMAN (Q14982) Opioid-binding protein/cell adhesion molecule precursor (OBCAM) (Opioid-binding cell adhesion molecule) (OPCML) [MASS=38007]                                                                                                                            | *                       | 7.54 | *    | *    | *  | 1 | 3 | GRMSTLTFNFVSEKDYGNITC[339]VATNK                 | 1 |
| OPHN1_HUMAN (O60890) Oligophrenin 1 [MASS=91640]                                                                                                                                                                                                                            | *                       | 4.99 | *    | *    | *  | 2 | 2 | RKTESIDK                                        | 1 |
|                                                                                                                                                                                                                                                                             |                         |      |      |      |    |   | 3 | ENLM[147]TPSNMGVIFGPTLMRAQEDTVAAM[147]M[147]NIK | 1 |
| OPSB_HUMAN (P03999) Blue-sensitive opsin (BOP) (Blue cone photoreceptor pigment) [MASS=39135]                                                                                                                                                                               | 0.00                    | 7.76 | 1.12 | 0.00 | 1  | 1 | 3 | M[147]VVVM[147]VGSFC[339]VC[339]YVPYAAFAMYMVNNR | 1 |
| P5CS_HUMAN (P54886) Delta 1-pyrroline-5-carboxylate synthetase (P5CS) (Aldehyde dehydrogenase 18 family member A1) [Includes: Glutamate 5-kinase (EC 2.7.2.11) (Gamma-glutamyl kinase) (GK); Gamma-glutamyl phosphate reductase (GPR) (EC 1.2.1.41) (Glutamate [MASS=87302] | *                       | 2.26 | *    | *    | *  | 1 | 2 | EMMLVTSGAVAFGKQRLR                              | 1 |

|                                                                                                                                                                                                                                               |      |      |      |      |   |   |   |                                           |   |
|-----------------------------------------------------------------------------------------------------------------------------------------------------------------------------------------------------------------------------------------------|------|------|------|------|---|---|---|-------------------------------------------|---|
| PACS1_HUMAN (Q6VY07) Phosphofurin acidic cluster sorting protein 1 (PACS-1) [MASS=104898]                                                                                                                                                     | 0.00 | 3.63 | 1.98 | 0.00 | 1 | 2 | 2 | RKLTSTSAITR                               | 1 |
|                                                                                                                                                                                                                                               |      |      |      |      |   |   | 2 | VMQYVNGAATTHQLPVAEAMLTC[339]R             | 1 |
| PANK4_HUMAN (Q9NVE7) Pantothenate kinase 4 (EC 2.7.1.33) (Pantothenic acid kinase 4) (hPanK4) [MASS=85990]                                                                                                                                    | *    | 6.21 | *    | *    | * | 3 | 2 | KFDELLHLASR                               | 1 |
|                                                                                                                                                                                                                                               |      |      |      |      |   |   | 2 | KLQERPWLVDSEWLQR                          | 1 |
|                                                                                                                                                                                                                                               |      |      |      |      |   |   | 3 | SLLHMISNDIGQLAC[339]LHAR                  | 2 |
| PAPPA_HUMAN (Q13219) Pappalysin-1 precursor (EC 3.4.24.79) (Pregnancy-associated plasma protein-A) (PAPP-A) (Insulin-like growth factor-dependent IGF-binding protein 4 protease) (IGF-dependent IGFBP-4 protease) (IGFBP-4ase) [MASS=181140] | *    | 3.50 | *    | *    | * | 4 | 3 | TKKVTPPFPM[147]SC[330]DLQGDC[339]AC[339]R | 1 |

PAPPA\_HUMAN (Q13219) Pappalysin-1 precursor (EC 3.4.24.79) (Pregnancy-associated plasma protein-A) (PAPP-A) (Insulin-like growth factor-dependent IGF-binding protein 4 protease) (IGF-dependent IGFBP-4 protease) (IGFBP-4ase) [MASS=181140] \* 3.50 \* \* \* 4

|                                                                                                                                                                                                                                               |   |      |      |      |      |   |             |                                                                                   |             |
|-----------------------------------------------------------------------------------------------------------------------------------------------------------------------------------------------------------------------------------------------|---|------|------|------|------|---|-------------|-----------------------------------------------------------------------------------|-------------|
| PAPPA_HUMAN (Q13219) Pappalysin-1 precursor (EC 3.4.24.79) (Pregnancy-associated plasma protein-A) (PAPP-A) (Insulin-like growth factor-dependent IGF-binding protein 4 protease) (IGF-dependent IGFBP-4 protease) (IGFBP-4ase) [MASS=181140] | * | 3.50 | *    | *    | *    | 4 | 2<br>1      | C[330]KVLMLGGSALNHNYR<br>HPAFVKK                                                  | 1<br>1      |
| PAR1_HUMAN (P25116) Proteinase-activated receptor 1 precursor (PAR-1) (Thrombin receptor) (Coagulation factor II receptor) [MASS=47440]                                                                                                       |   | 0.00 | 2.35 | 0.28 | 0.00 | 1 | 1           | 2 C[330]LSSSAVANR                                                                 | 1           |
| PAR4_HUMAN (Q96RI0) Proteinase-activated receptor 4 precursor (PAR-4) (Thrombin receptor-like 3) (Coagulation factor II receptor-like 3) [MASS=41163]                                                                                         | * | 8.05 | *    | *    | *    | 1 | 3           | LALGLC[330]M[147]AAWLM[147]AAALALPLTLQRQTFLRAR                                    | 1           |
| PARK7_HUMAN (Q99497) Protein DJ-1 (Oncogene DJ1) [MASS=19891]                                                                                                                                                                                 |   | 0.00 | 8.47 | 0.96 | 0.00 | 1 | 1           | 2 VTVAGLAGKDPVQC[339]SR                                                           | 1           |
| PC11Y_HUMAN (Q9BZA8) Protocadherin-11 Y-linked precursor (Protocadherin-11) (Protocadherin-22) (Protocadherin on the Y chromosome) (PCDH-Y) (Protocadherin prostate cancer) (Protocadherin-PC) [MASS=146774]                                  | * | 1.57 | *    | *    | *    | 1 | 2           | NM[147]QNSEWATPNPENRQM[147]IMM[147]K                                              | 1           |
| PCDA3_HUMAN (Q9Y5H8) Protocadherin alpha 3 precursor (PCDH-alpha3) [MASS=102428]                                                                                                                                                              | * | 1.47 | *    | *    | *    | 1 | 2           | C[330]SAPPTGDC[339]GPGK                                                           | 1           |
| PCDA4_HUMAN (Q9UN74) Protocadherin alpha 4 precursor (PCDH-alpha4) [MASS=102293]                                                                                                                                                              |   | 0.00 | 2.75 | *    | *    | * | 1           | 3 SAEC[330]SIHLEVIVDRPLQVFHVDVEVR                                                 | 1           |
| PCDA6_HUMAN (Q9UN73) Protocadherin alpha 6 precursor (PCDH-alpha6) [MASS=102715]                                                                                                                                                              |   | 0.00 | 2.42 | 0.74 | 0.00 | 1 | 1           | 3 DREDLLEVNLRNGILFVNSRIDR                                                         | 1           |
| PCDAC_HUMAN (Q9UN75) Protocadherin alpha 12 precursor (PCDH-alpha12) [MASS=101651]                                                                                                                                                            |   | 0.00 | 1.91 | 3.38 | 0.00 | 1 | 2           | 2 VC[339]SAESPPK<br>2 C[339]SAPPTVSR                                              | 1<br>1      |
| PCDGL_HUMAN (Q9Y5F7) Protocadherin gamma C4 precursor (PCDH-gamma-C4) [MASS=101213]                                                                                                                                                           |   | 0.00 | 5.12 | 0.59 | 0.00 | 1 | 2           | 3 GAAC[339]GVTC[330]FPAGTC[339]AC[339]LTRSRR<br>3 LTLYLAVSLVAIC[330]FVSFGSFWALLSK | 1<br>1      |
| PCF11_HUMAN (O94913) Pre-mRNA cleavage complex 2 protein Pcf11 (Pre-mRNA cleavage complex II protein Pcf11) (Fragment) [MASS=183979]                                                                                                          | * | 2.48 | *    | *    | *    | 3 | 2<br>2<br>2 | YDSVINRLYTGIQC[339]YSC[339]GMR<br>SPSPLKNK<br>FEGPLLQQGVGM[147]R                  | 1<br>1<br>1 |



|                                                                                                                                                                                                                                              |      |      |      |      |   |    |                                |                                          |   |
|----------------------------------------------------------------------------------------------------------------------------------------------------------------------------------------------------------------------------------------------|------|------|------|------|---|----|--------------------------------|------------------------------------------|---|
| PCLO_HUMAN (Q9Y6V0) Protein piccolo (Aczonin) [MASS=566653]                                                                                                                                                                                  | *    | 4.88 | *    | *    | * | 10 | 3                              | AAAGPLPPISADTRDQFGSSHSLPEVQQHM[147]REESR | 1 |
|                                                                                                                                                                                                                                              |      |      |      |      |   |    | 2                              | TTPPLKTDSAKPSQSFPTGEK                    | 1 |
|                                                                                                                                                                                                                                              |      |      |      |      |   |    | 2                              | PASQLPSGSPSVSSLPKPR                      | 1 |
|                                                                                                                                                                                                                                              |      |      |      |      |   |    | 3                              | GGSLGC[330]QTEADSDTQSPQYLSATSPPKDK       | 1 |
|                                                                                                                                                                                                                                              |      |      |      |      |   |    | 3                              | VYKLPTAVSLYSPTDEQSIMQK                   | 1 |
|                                                                                                                                                                                                                                              |      |      |      |      |   |    | 2                              | VKETLSM[147]EKIPPMVTTDQK                 | 1 |
|                                                                                                                                                                                                                                              |      |      |      |      |   |    | 2                              | KQIEM[147]SADEDASGEDEFIRNQLK             | 1 |
|                                                                                                                                                                                                                                              |      |      |      |      |   |    | 2                              | FM[147]KKTLLIGEAC[339]IWLDK              | 1 |
|                                                                                                                                                                                                                                              |      |      |      |      |   |    | 3                              | FMGSSLGTGLTGLNTIRSALQDEADKPYSSGSR        | 1 |
|                                                                                                                                                                                                                                              |      |      |      |      |   | 3  | SGPYGYRGIGGMKPSMSDTNLAEAGHFFYK | 1                                        |   |
| PCOC2_HUMAN (Q9UKZ9) Procollagen C-endopeptidase enhancer 2 precursor (Procollagen COOH-terminal proteinase enhancer 2) (Procollagen C-proteinase enhancer 2) (PCPE-2) [MASS=45716]                                                          | 0.00 | 6.99 | 6.62 | 0.00 | 1 | 1  | 2                              | LPTTTEQPVTTFPVTTLGLKPTVALC[339]QQK       | 1 |
| PCSK5_HUMAN (Q92824) Proprotein convertase subtilisin/kexin type 5 precursor (EC 3.4.21.-) (Proprotein convertase PC5) (Subtilisin/kexin-like protease PC5) (hPC6) [MASS=101775]                                                             | 0.00 | 3.07 | 0.21 | 0.00 | 1 | 1  | 3                              | ASGC[330]SDNPNRHVNYLEHVVVITITHPR         | 1 |
| PCSK6_HUMAN (P29122) Proprotein convertase subtilisin/kexin type 6 precursor (EC 3.4.21.-) (Paired basic amino acid cleaving enzyme 4) (Subtilisin/kexin-like protease PACE4) (Subtilisin-like proprotein convertase 4) (SPC4) [MASS=106420] | *    | 5.68 | *    | *    | * | 2  | 3                              | QVRSDPQALYFNDPIWSNMWYLHC[339]GDK         | 1 |
|                                                                                                                                                                                                                                              |      |      |      |      |   |    | 3                              | EGDYC[330]SC[339]DGYTNSIYTISVSSATENGYK   | 1 |
| PDCD7_HUMAN (Q8N8D1) Programmed cell death protein 7 (ES18) (HES18) [MASS=54700]                                                                                                                                                             | *    | 2.47 | *    | *    | * | 1  | 2                              | QWLEAVFGTPRR                             | 1 |
| PDE2A_HUMAN (O00408) cGMP-dependent 3',5'-cyclic phosphodiesterase (EC 3.1.4.17) (Cyclic GMP-stimulated phosphodiesterase) (CGS-PDE) (cGSPDE) [MASS=105716]                                                                                  | 0.00 | 2.23 | 1.34 | 0.00 | 1 | 1  | 2                              | VLGEEVSFPLTGC[339]LGQVVEDK               | 1 |
| PDE5A_HUMAN (O76074) cGMP-specific 3',5'-cyclic phosphodiesterase (EC 3.1.4.35) (CGB-PDE) (cGMP-binding cGMP-specific phosphodiesterase) [MASS=100012]                                                                                       | *    | 3.31 | *    | *    | * | 1  | 3                              | NQFNLEDPHQKELFLAMLMTAC[339]DLSAITK       | 1 |

|                                                                                                                                                                                                                                                  |      |       |      |      |   |   |   |                                    |   |
|--------------------------------------------------------------------------------------------------------------------------------------------------------------------------------------------------------------------------------------------------|------|-------|------|------|---|---|---|------------------------------------|---|
| PDE6C_HUMAN (P51160) Cone cGMP-specific 3',5'-cyclic phosphodiesterase alpha'-subunit (EC 3.1.4.35) (cGMP phosphodiesterase 6C) [MASS=99146]                                                                                                     | 0.00 | 2.10  | 1.23 | 0.00 | 1 | 1 | 2 | EIIMAMMMTAC[339]DLSAITK            | 1 |
| PDE8A_HUMAN (O60658) High-affinity cAMP-specific and IBMX-insensitive 3',5'-cyclic phosphodiesterase 8A (EC 3.1.4.17) [MASS=93303]                                                                                                               | 0.00 | 4.58  | 0.89 | 0.00 | 1 | 2 | 3 | AC[330]NSVFTALENSEDAIEITSEDR       | 1 |
|                                                                                                                                                                                                                                                  |      |       |      |      |   |   | 3 | ATEVSSQRRRHSSM[147]AR              | 1 |
| PDIA6_HUMAN (Q15084) Protein disulfide-isomerase A6 precursor (EC 5.3.4.1) (Protein disulfide isomerase P5) (Thioredoxin domain-containing protein 7) [MASS=48121]                                                                               | *    | 6.59  | *    | *    | * | 1 | 3 | ELSFGRGSTAPVGGGAFPTIVEREPWDGR      | 1 |
| PDK2_HUMAN (Q15119) [Pyruvate dehydrogenase [lipoamide]] kinase isozyme 2, mitochondrial precursor (EC 2.7.11.2) (Pyruvate dehydrogenase kinase isoform 2) [MASS=46154]                                                                          | 0.00 | 16.95 | 0.62 | 0.00 | 1 | 3 | 2 | HIGSIDPNC[339]NVSEVVK              | 1 |
|                                                                                                                                                                                                                                                  |      |       |      |      |   |   | 3 | LLC[339]DKYYMASPDLEIQEINAANSK      | 1 |
|                                                                                                                                                                                                                                                  |      |       |      |      |   |   | 3 | LPVYNKSAWRHYQTIQEAGDWC[330]VPSTEPK | 1 |
| PDZK6_HUMAN (Q9ULD6) PDZ domain-containing protein 6 [MASS=105647]                                                                                                                                                                               | 0.00 | 6.16  | 0.72 | 0.00 | 1 | 3 | 3 | HYMLC[330]VLLEAGGC[339]ASK         | 1 |
|                                                                                                                                                                                                                                                  |      |       |      |      |   |   | 3 | STLPNPFHLGNLKK                     | 1 |
|                                                                                                                                                                                                                                                  |      |       |      |      |   |   | 2 | GIFLTLC[330]DMLNVTGTQVTSSSLLNGK    | 1 |
|                                                                                                                                                                                                                                                  |      |       |      |      |   |   | 2 | FLQVHASSGHK                        | 3 |
| PELO_HUMAN (Q9BRX2) Protein pelota homolog [MASS=43377]                                                                                                                                                                                          | 0.00 | 8.57  | *    | *    | * | 2 | 3 | VRTTLTLC[330]VEAIDFDSQAC[330]QLR   | 1 |
|                                                                                                                                                                                                                                                  |      |       |      |      |   |   |   |                                    |   |
| PEO1_HUMAN (Q96RR1) Twinkle protein, mitochondrial precursor (EC 3.6.1.-) (T7 gp4-like protein with intramitochondrial nucleoid localization) (T7-like mitochondrial DNA helicase) (Progressive external ophthalmoplegia 1 protein) [MASS=77154] | 0.00 | 3.80  | 0.89 | 0.00 | 1 | 1 | 3 | KGATTQNSEIC[330]SGQAPTPDQPDTSKR    | 1 |
| PGAM1_HUMAN (P18669) Phosphoglycerate mutase 1 (EC 5.4.2.1) (EC 5.4.2.4) (EC 3.1.3.13) (Phosphoglycerate mutase isozyme B) (PGAM-B) (BPG-dependent PGAM 1) [MASS=28673]                                                                          | 0.00 | 8.30  | 0.80 | 0.00 | 1 | 1 | 2 | YADLTEDQLPSC[339]ESLKDTIAR         | 1 |
| PGCB_HUMAN (Q96GW7) Brevican core protein precursor (Brain-enriched hyaluronan-binding protein) (Protein BEHAB) [MASS=99117]                                                                                                                     | *    | 3.51  | *    | *    | * | 2 | 3 | C[339]QENGRWEAPQISC[330]VPR        | 1 |
|                                                                                                                                                                                                                                                  |      |       |      |      |   |   | 2 | FC[339]NPGWDAFQGAC[330]YK          | 1 |

|                                                                                                                                                                                                |      |       |      |      |   |   |   |                                        |   |
|------------------------------------------------------------------------------------------------------------------------------------------------------------------------------------------------|------|-------|------|------|---|---|---|----------------------------------------|---|
| PGDH_HUMAN (P15428) 15-hydroxyprostaglandin dehydrogenase [NAD+] (EC 1.1.1.141) (PGDH) (Prostaglandin dehydrogenase 1) [MASS=28977]                                                            | *    | 20.68 | *    | *    | * | 2 | 2 | VALVTGAAQIGRAFAEALLK                   | 1 |
|                                                                                                                                                                                                |      |       |      |      |   |   | 3 | DMIKYYGILDPPLIANGLITLIEDDALNGAIM[147]K | 1 |
| PGES2_HUMAN (Q9H7Z7) Prostaglandin E synthase 2 (EC 5.3.99.3) (Microsomal prostaglandin E synthase 2) (mPGES-2) [Contains: Prostaglandin E synthase 2 truncated form] [MASS=41943]             | *    | 9.55  | *    | *    | * | 2 | 2 | EDLYEAADKWVVAVGKDR                     | 1 |
|                                                                                                                                                                                                |      |       |      |      |   |   | 2 | AGFAGAAGGPPVAAARK                      | 5 |
| PGLB_HUMAN (Q99645) Dermatan sulfate proteoglycan 3 precursor (Epiphycan) (Small chondroitin/dermatan sulfate proteoglycan) (Proteoglycan-Lb) (PG-Lb) [MASS=36578]                             | 0.00 | 6.21  | 1.43 | 0.00 | 1 | 1 | 3 | LDGNPINLSKTPQAYMC[339]LPR              | 1 |
| PHAR1_HUMAN (Q9C0D0) Phosphatase and actin regulator 1 [MASS=66308]                                                                                                                            | *    | 5.00  | *    | *    | * | 2 | 2 | MIDELNKTLAM[147]TMQR                   | 1 |
|                                                                                                                                                                                                |      |       |      |      |   |   | 3 | PWTRLTAADKAAIR                         | 1 |
| PHLB1_HUMAN (Q86UU1) Pleckstrin homology-like domain family B member 1 (Protein LL5-alpha) [MASS=151161]                                                                                       | 0.00 | 8.21  | 1.04 | 0.00 | 1 | 6 | 3 | ADGGPEAGELPSIGEATAALALAGR              | 1 |
|                                                                                                                                                                                                |      |       |      |      |   |   | 3 | EAEALETETKLFEDLEFQQLER                 | 1 |
|                                                                                                                                                                                                |      |       |      |      |   |   | 2 | GQQVIEEQR                              | 1 |
|                                                                                                                                                                                                |      |       |      |      |   |   | 3 | EAEALETETKLFEDLEFQQLERESR              | 1 |
|                                                                                                                                                                                                |      |       |      |      |   |   | 3 | LFEDLEFQQLER                           | 1 |
|                                                                                                                                                                                                |      |       |      |      |   |   | 2 | EEC[339]SSTESTQQEHEDAPSTK              | 1 |
| PHYIP_HUMAN (Q92561) Phytanoyl-CoA hydroxylase-interacting protein (Phytanoyl-CoA hydroxylase-associated protein 1) (PAHXAP1) (PAHX-AP1) [MASS=37572]                                          | *    | 2.73  | *    | *    | * | 1 | 2 | ENKNSNKFK                              | 2 |
| PIAS3_HUMAN (Q9Y6X2) Protein inhibitor of activated STAT protein 3 [MASS=68017]                                                                                                                | 0.00 | 4.94  | 0.28 | 0.00 | 1 | 1 | 3 | EASEVC[330]PPPGYGLDGLQYSPVQGGDPSENKK   | 1 |
| PIGO_HUMAN (Q8TEQ8) Phosphatidylinositol-glycan biosynthesis, class O protein (PIG-O) [MASS=118698]                                                                                            | *    | 2.39  | *    | *    | * | 1 | 2 | C[339]PEETPVC[339]HSSPWLSPVLMVGGRAK    | 1 |
| PK3CA_HUMAN (P42336) Phosphatidylinositol-4,5-bisphosphate 3-kinase catalytic subunit alpha isoform (EC 2.7.1.153) (PI3-kinase p110 subunit alpha) (PtdIns-3-kinase p110) (PI3K) [MASS=124412] | *    | 2.53  | *    | *    | * | 1 | 2 | RPDFMDALQGLLSPLNPAHQLGNLRLK            | 1 |

|                                                                                                                                                                                                                                                        |      |       |      |      |   |   |   |                                                         |   |
|--------------------------------------------------------------------------------------------------------------------------------------------------------------------------------------------------------------------------------------------------------|------|-------|------|------|---|---|---|---------------------------------------------------------|---|
| PK3CG_HUMAN (P48736) Phosphatidylinositol-4,5-bisphosphate 3-kinase catalytic subunit gamma isoform (EC 2.7.1.153) (PI3-kinase p110 subunit gamma) (PtdIns-3-kinase subunit p110) (PI3K) (PI3Kgamma) (p120-PI3K) [MASS=126453]                         | *    | 2.81  | *    | *    | * | 2 | 3 | VC[339]GRDEYLVGETPIKNFQWVR                              | 1 |
|                                                                                                                                                                                                                                                        |      |       |      |      |   |   | 2 | YFLDQIEVC[339]R                                         | 1 |
| PKHA5_HUMAN (Q9HAU0) Pleckstrin homology domain-containing family A member 5 (Phosphoinositol 3-phosphate-binding protein 2) (PEPP-2) [MASS=127463]                                                                                                    | *    | 2.51  | *    | *    | * | 1 | 2 | KTENISYEMLFEPEPNGVNSVEMM[147]DKER                       | 1 |
| PKHB1_HUMAN (Q9UF11) Pleckstrin homology domain-containing family B member 1 (Pleckstrin homology domain retinal protein 1) (PH domain-containing protein in retina 1) (PHRET1) [MASS=27186]                                                           | 0.38 | 20.16 | 0.82 | 0.00 | 1 | 2 | 3 | EDPC[339]YSAGAPLAM[147]GM[147]LAGAATGAALGSLMWSPC[330]WF | 1 |
|                                                                                                                                                                                                                                                        |      |       |      |      |   |   | 3 | IGPEC[339]HDVQPPEGR                                     | 1 |
| PLCC_HUMAN (Q9NRZ7) 1-acyl-sn-glycerol-3-phosphate acyltransferase gamma (EC 2.3.1.51) (1-AGP acyltransferase 3) (1-AGPAT 3) (Lysophosphatidic acid acyltransferase-gamma) (LPAAT-gamma) (1-acylglycerol-3-phosphate O-acyltransferase 3) [MASS=43381] | 0.00 | 6.12  | 0.29 | 0.00 | 1 | 1 | 2 | KELLYVPLIGWTWYFLEIVFC[330]KR                            | 1 |

3 ILFC[330]DVLRAIR 15

PLCD1\_HUMAN (P51178) 1-phosphatidylinositol-4,5-bisphosphate phosphodiesterase delta 1 (EC 3.1.4.11) (Phosphoinositide phospholipase C) (PLC-delta-1) (Phospholipase C-delta-1) (PLC-III) [MASS=85763] \* 3.97 \* \* \* 2

3 VMRTPESQLFSIEDIQEVR 1  
1 ILFC[339]DVLRAIR 1

PO5F1\_HUMAN (Q01860) POU domain, class 5, transcription factor 1 (Octamer-binding transcription factor 3) (Oct-3) (Oct-4) [MASS=38570] 0.00 5.00 \* \* \* 1 2 VFSQTTIC[339]RFEALQLSFK 1

POLK\_HUMAN (Q9UBT6) DNA polymerase kappa (EC 2.7.7.7) (DINB protein) (DINP) [MASS=98808] \* 2.76 \* \* \* 2 2 FYGNELKK 1  
1 YFIKM[147]GSSVENDNPGK 1

PP1A\_HUMAN (P62136) Serine/threonine-protein phosphatase PP1-alpha catalytic subunit (EC 3.1.3.16) (PP-1A) [MASS=37512] 0.82 9.09 0.85 0.00 1 2 2 GNHEC[330]ASINR 1  
2 PTDVDPQGLLC[330]DLLWSDPK 1

PP1B\_HUMAN 0.82 7.67 \* \* \* 1 3 GVSFTFGADVSKFLNRHDLDLIC[339]R 1

PPARB\_HUMAN (Q03181) Peroxisome proliferator-activated receptor delta (PPAR-delta) (PPAR-beta) (Nuclear hormone receptor 1) (NUC1) (NUCI) [MASS=49903] 0.00 6.35 3.61 0.00 1 1 3 SSSPPSLDQLQM[147]GC[339]DGASC[339]GSLNM[147]EC[339]R 1

PPIA\_HUMAN (P62937) Peptidyl-prolyl cis-trans isomerase A (EC 5.2.1.8) (PPIase A) (Rotamase A) (Cyclophilin A) (Cyclosporin A-binding protein) [MASS=17881] 1.00 45.73 1.02 0.11 5 3 3 HTGPGILSM[147]ANAGPNTNGSQFFIC[339]TAKTEWLDGK 1  
2 IIPGFM[147]C[339]QGGDFTR 1  
2 IIPGFM[147]C[330]QGGDFTR 2  
2 IIPGFMC[330]QGGDFTR 1  
2 HTGPGILSM[147]ANAGPNTNGSQFFIC[330]TAK 1

|                                                                                                                                                                                                                                                                              |      |       |      |      |   |   |   |                                              |   |
|------------------------------------------------------------------------------------------------------------------------------------------------------------------------------------------------------------------------------------------------------------------------------|------|-------|------|------|---|---|---|----------------------------------------------|---|
| PPIB_HUMAN (P23284) Peptidyl-prolyl cis-trans isomerase B precursor (EC 5.2.1.8) (PPIase) (Rotamase) (Cyclophilin B) (S-cyclophilin) (SCYLP) (CYP-S1) [MASS=22742]                                                                                                           | *    | 20.19 | *    | *    | * | 2 | 3 | HYGPGWVSM[147]ANAGKDTNGSQFFITTVK             | 1 |
|                                                                                                                                                                                                                                                                              |      |       |      |      |   |   | 3 | SIYGERFPDENFKLK                              | 1 |
| PPP5_HUMAN (P53041) Serine/threonine-protein phosphatase 5 (EC 3.1.3.16) (PP5) (Protein phosphatase T) (PP-T) (PPT) [MASS=56878]                                                                                                                                             | *    | 5.81  | *    | *    | * | 1 | 2 | PQFHQFTAVPHPNVKPM[147]JAYANTLLQLGMM          | 1 |
| PR285_HUMAN (Q9BYK8) Peroxisomal proliferator-activated receptor A-interacting complex 285 kDa protein (EC 3.6.1.-) (ATP-dependent helicase PRIC285) (PPAR-alpha-interacting complex protein 285) (PPAR-gamma DBD-interacting protein 1) (PDIP1) [MASS=294533]               | *    | 1.93  | *    | *    | * | 4 | 3 | QAPNPYSSEIK                                  | 1 |
|                                                                                                                                                                                                                                                                              |      |       |      |      |   |   | 3 | VHLFVHHM[147]GM[147]EK                       | 1 |
|                                                                                                                                                                                                                                                                              |      |       |      |      |   |   | 1 | VPPHPR                                       | 1 |
|                                                                                                                                                                                                                                                                              |      |       |      |      |   |   | 2 | HSVC[339]PEGLSM[147]EQVEQGVQRRR              | 1 |
| PRDM7_HUMAN (Q9NQW5) PR domain zinc finger protein 7 (PR domain-containing protein 7) [MASS=45965]                                                                                                                                                                           | *    | 4.42  | *    | *    | * | 1 | 3 | AFSSPPKGQMGSSRVGER                           | 1 |
| PRDM8_HUMAN (Q9NQV8) PR domain zinc finger protein 8 (PR domain-containing protein 8) [MASS=71709]                                                                                                                                                                           | 0.00 | 5.66  | 1.85 | 0.00 | 1 | 1 | 2 | GGSSC[339]SPAQSLSSGSGSGGGGGHQEAELSPDGIATGGGK | 1 |
| PRDX3_HUMAN (P30048) Thioredoxin-dependent peroxide reductase, mitochondrial precursor (EC 1.11.1.15) (Peroxiredoxin-3) (PRX III) (Antioxidant protein 1) (AOP-1) (Protein MER5 homolog) (HBC189) [MASS=27692]                                                               | 1.00 | 21.88 | 0.96 | 0.15 | 4 | 2 | 2 | YLVFFFYPLDFTFVC[339]PTEIVAFSDK               | 1 |
|                                                                                                                                                                                                                                                                              |      |       |      |      |   |   | 3 | AFQYVETHGEVC[330]PANWTPDSPTIKPSAASK          | 1 |
|                                                                                                                                                                                                                                                                              |      |       |      |      |   |   | 3 | AFQYVETHGEVC[339]PANWTPDSPTIKPSAASK          | 3 |
| PRDX5_HUMAN (P30044) Peroxiredoxin-5, mitochondrial precursor (EC 1.11.1.15) (Prx-V) (Peroxisomal antioxidant enzyme) (PLP) (Thioredoxin reductase) (Thioredoxin peroxidase PMP20) (Antioxidant enzyme B166) (AOEB166) (TPx type VI) (Liver tissue 2D-page spo) [MASS=22026] | 0.80 | 7.48  | 1.72 | 0.00 | 1 | 1 | 2 | GVLFVPGAFTPGC[339]SK                         | 1 |
| PREX1_HUMAN (Q8TCU6) Phosphatidylinositol 3,4,5-trisphosphate-dependent Rac exchanger 1 protein (P-Rex1 protein) [MASS=186203]                                                                                                                                               | 0.00 | 4.52  | 1.14 | 0.00 | 1 | 4 | 3 | GAAPPYVYAVGRGSEAMAAGLC[339]AGQC[339]ILK      | 1 |
|                                                                                                                                                                                                                                                                              |      |       |      |      |   |   | 2 | RTKSINGSLYIFR                                | 1 |
|                                                                                                                                                                                                                                                                              |      |       |      |      |   |   | 3 | AFYLERSNLPTDASTTAVK                          | 1 |
|                                                                                                                                                                                                                                                                              |      |       |      |      |   |   | 2 | AFFLFDNLLVYC[339]KR                          | 1 |

|                                                                                                                                                                                                |      |       |      |      |   |   |   |                                              |   |
|------------------------------------------------------------------------------------------------------------------------------------------------------------------------------------------------|------|-------|------|------|---|---|---|----------------------------------------------|---|
| PRI2_HUMAN (P49643) DNA primase large subunit (EC 2.7.7.-) (DNA primase 58 kDa subunit) (p58) [MASS=58806]                                                                                     | 0.00 | 3.73  | 1.28 | 0.00 | 1 | 1 | 2 | ISLDQIDLLSTKSFPPC[330]M[147]R                | 1 |
| PRI0_HUMAN (P04156) Major prion protein precursor (PrP) (PrP27-30) (PrP33-35C) (ASCR) (CD230 antigen) [MASS=27661]                                                                             | *    | 10.28 | *    | *    | * | 1 | 3 | HM[147]AGAAAAGAVVGGGLGGYM[147]LGSAM[147]SR   | 1 |
|                                                                                                                                                                                                |      |       |      |      |   |   | 3 | HM[147]AGAAAAGAVVGGGLGGYM[147]LGSAMSR        | 1 |
| PROF1_HUMAN (P07737) Profilin-1 (Profilin I) [MASS=14923]                                                                                                                                      | 0.00 | 15.11 | 1.00 | 0.00 | 1 | 1 | 2 | C[330]SVIRDSELLQDGEFSMDLRTK                  | 1 |
| PROZ_HUMAN (P22891) Vitamin K-dependent protein Z precursor [MASS=44744]                                                                                                                       | *    | 9.25  | *    | *    | * | 2 | 1 | LGEDHK                                       | 2 |
|                                                                                                                                                                                                |      |       |      |      |   |   | 3 | EHRGSWFLTGVLGSQPVGGQAHM[147]VLVTKVSR         | 1 |
| PRP16_HUMAN (Q92620) Pre-mRNA-splicing factor ATP-dependent RNA helicase PRP16 (EC 3.6.1.-) (ATP-dependent RNA helicase DHX38) (DEAH box protein 38) [MASS=140502]                             | *    | 4.40  | *    | *    | * | 2 | 3 | DWEESKDDQKDAEEEGDQAGQNIR                     | 1 |
|                                                                                                                                                                                                |      |       |      |      |   |   | 3 | MLIVSC[339]DMGC[330]SSEILLIVSM[147]LSVPAIFYR | 1 |
| PRPS1_HUMAN (P60891) Ribose-phosphate pyrophosphokinase I (EC 2.7.6.1) (Phosphoribosyl pyrophosphate synthetase I) (PRS-I) (PPRibP) [MASS=34703]                                               | *    | 5.68  | *    | *    | * | 1 | 2 | RVTSIADRLNVDFAIHK                            | 1 |
| PRS23_HUMAN (O95084) Serine protease 23 precursor (EC 3.4.21.-) (Putative secreted protein ZSIG13) [MASS=43001]                                                                                | *    | 6.01  | *    | *    | * | 2 | 1 | IGVSPPAK                                     | 1 |
|                                                                                                                                                                                                |      |       |      |      |   |   | 2 | RQIYGYSRFSIFGK                               | 1 |
| PSA5_HUMAN (P28066) Proteasome subunit alpha type 5 (EC 3.4.25.1) (Proteasome zeta chain) (Macropain zeta chain) (Multicatalytic endopeptidase complex zeta chain) [MASS=26411]                | 0.00 | 8.71  | 0.76 | 0.00 | 1 | 1 | 2 | LGSTAIGIQTSEGVC[330]LAVEKR                   | 1 |
| PSD13_HUMAN (Q9UNM6) 26S proteasome non-ATPase regulatory subunit 13 (26S proteasome regulatory subunit S11) (26S proteasome regulatory subunit p40.5) [MASS=42918]                            | 0.00 | 9.57  | 0.90 | 0.00 | 1 | 2 | 3 | IQLLC[330]LMEM[147]TFTRPANHR                 | 1 |
|                                                                                                                                                                                                |      |       |      |      |   |   | 2 | QMTDPNVALTFLEKTREK                           | 1 |
| PSD1_HUMAN (Q99460) 26S proteasome non-ATPase regulatory subunit 1 (26S proteasome regulatory subunit RPN2) (26S proteasome regulatory subunit S1) (26S proteasome subunit p112) [MASS=105836] | *    | 2.83  | *    | *    | * | 1 | 3 | ILSGEM[147]AIELHLQFLIRNNNTDLM[147]JLK        | 1 |

|                                                                                                                                                                                                                                                               |      |       |      |      |   |   |   |                                      |   |
|---------------------------------------------------------------------------------------------------------------------------------------------------------------------------------------------------------------------------------------------------------------|------|-------|------|------|---|---|---|--------------------------------------|---|
| PSL1_HUMAN (Q8TCT7) Signal peptide peptidase-like 2B (EC 3.4.23.-) (Protein SPP-like 2B) (Protein SPPL2b) (Intramembrane protease 4) (IMP4) (Presenilin-like protein 1) [MASS=64643]                                                                          | *    | 4.56  | *    | *    | * | 1 | 2 | SGSSIMVEVATGPSDSATREKLPM[147]VLK     | 1 |
| PTN13_HUMAN (Q12923) Tyrosine-protein phosphatase non-receptor type 13 (EC 3.1.3.48) (Protein-tyrosine phosphatase 1E) (PTP-E1) (hPTPE1) (PTP-BAS) (Protein-tyrosine phosphatase PTPL1) (Fas-associated protein-tyrosine phosphatase 1) (FAP-1) [MASS=276904] | 0.00 | 3.30  | 0.18 | 0.00 | 1 | 4 | 2 | KVNIMLLNGQRLELTC[330]DTK             | 1 |
|                                                                                                                                                                                                                                                               |      |       |      |      |   |   | 2 | IGC[339]YVHDVIQDPAKSDGRLK            | 1 |
|                                                                                                                                                                                                                                                               |      |       |      |      |   |   | 3 | GLSQQEVISALRGTAPEVFLLLC[330]R        | 1 |
|                                                                                                                                                                                                                                                               |      |       |      |      |   |   | 2 | LHNTYVVGASEKETELEFLK                 | 1 |
| PTN18_HUMAN (Q99952) Tyrosine-protein phosphatase non-receptor type 18 (EC 3.1.3.48) (Brain-derived phosphatase) [MASS=50384]                                                                                                                                 | 0.00 | 1.53  | 0.06 | 0.00 | 1 | 1 | 2 | VILM[147]AC[330]R                    | 1 |
| PTPRO_HUMAN (Q16827) Receptor-type tyrosine-protein phosphatase O precursor (EC 3.1.3.48) (Glomerular epithelial protein 1) (Protein tyrosine phosphatase U2) (PTPase U2) (PTP-U2) [MASS=138281]                                                              | 0.00 | 1.97  | 1.01 | 0.00 | 1 | 1 | 2 | SKGPMIIHC[330]SAGVGRGTGFIALDR        | 1 |
| PTPRS_HUMAN (Q13332) Receptor-type tyrosine-protein phosphatase S precursor (EC 3.1.3.48) (R-PTP-S) (Protein-tyrosine phosphatase sigma) (R-PTP-sigma) [MASS=217093]                                                                                          | *    | 1.49  | *    | *    | * | 1 | 3 | FSVLPPTFHPGDQKQYGGFDNRGLEPGHR        | 1 |
| PUS3_HUMAN (Q9BZE2) tRNA pseudouridine synthase 3 (EC 5.4.99.-) (tRNA-uridine isomerase 3) (tRNA pseudouridylate synthase 3) [MASS=55615]                                                                                                                     | *    | 12.68 | *    | *    | * | 2 | 2 | M[147]DVANGVINFRQRTILSAQVQLVGQSPGEGR | 1 |
|                                                                                                                                                                                                                                                               |      |       |      |      |   |   | 3 | IAYMGWGYQGFASQENTNNTIEEKLFEALTK      | 1 |
| PX11C_HUMAN (Q96HA9) Peroxisomal membrane protein 11C (Peroxin-11C) (Peroxisomal biogenesis factor 11C) (PEX11gamma) (Pex11pgamma) [MASS=26636]                                                                                                               | *    | 4.98  | *    | *    | * | 1 | 3 | LLVSTQLSHC[339]R                     | 3 |



|                                                                                                                                                                                                      |      |      |       |      |   |   |   |                                              |   |
|------------------------------------------------------------------------------------------------------------------------------------------------------------------------------------------------------|------|------|-------|------|---|---|---|----------------------------------------------|---|
| PYR1_HUMAN (P27708) CAD protein<br>[Includes: Glutamine-dependent carbamoyl-phosphate synthase (EC 6.3.5.5); Aspartate carbamoyltransferase (EC 2.1.3.2); Dihydroorotase (EC 3.5.2.3)] [MASS=242982] | *    | 2.07 | *     | *    | * | 2 | 3 | GLPVTC[339]EVAPHHLFLSHDDLER                  | 1 |
|                                                                                                                                                                                                      |      |      |       |      |   |   | 2 | LGYPVLVRAAFALGGLGSGFASNR                     | 1 |
| RAB1A_HUMAN (P62820) Ras-related protein Rab-1A (YPT1-related protein) [MASS=22546]                                                                                                                  | *    | 3.43 | *     | *    | * | 1 | 2 | C[339]DLTTKK                                 | 1 |
| RAC1_HUMAN (P63000) Ras-related C3 botulinum toxin substrate 1 precursor (p21-Rac1) (Ras-like protein TC25) [MASS=21450]                                                                             | 1.00 | 7.29 | 0.66  | 0.01 | 2 | 1 | 2 | HHC[330]PNTPIILVGTK                          | 1 |
|                                                                                                                                                                                                      |      |      |       |      |   |   | 2 | HHC[339]PNTPIILVGTK                          | 1 |
| RAF1_HUMAN (P04049) RAF proto-oncogene serine/threonine-protein kinase (EC 2.7.11.1) (Raf-1) (C-RAF) (cRaf) [MASS=73051]                                                                             | 0.00 | 6.64 | 1.08  | 0.00 | 1 | 2 | 2 | TVVNVNRNGMSLHDC[330]LMK                      | 1 |
|                                                                                                                                                                                                      |      |      |       |      |   |   | 3 | SASEPSLHRAAHTEDINAC[330]TLTTSPR              | 1 |
| RAG1_HUMAN (P15918) V(D)J recombination-activating protein 1 (RAG-1) (RING finger protein 74) [MASS=119115]                                                                                          | 0.00 | 5.56 | 0.65  | 0.00 | 1 | 3 | 3 | VC[330]ILRC[339]LKVMGSSYC[339]PSC[330]R      | 1 |
|                                                                                                                                                                                                      |      |      |       |      |   |   | 2 | EC[330]NEEVSLEK                              | 1 |
|                                                                                                                                                                                                      |      |      |       |      |   |   | 3 | PLC[330]LM[147]LADESDHETLTAILSPLIAEREAMK     | 1 |
| RAI14_HUMAN (Q9P0K7) Ankyrin repeat and coiled-coil structure-containing protein) (Retinoic acid-induced protein 14) (Novel retinal pigment epithelial cell protein) [MASS=110041]                   | *    | 2.14 | *     | *    | * | 1 | 2 | LKDTLKSQMTQEASDEAEDM[147]K                   | 1 |
| RAI1_HUMAN (Q7Z5J4) Retinoic acid-induced protein 1 [MASS=203351]                                                                                                                                    | 0.00 | 2.36 | 11.99 | 0.00 | 1 | 2 | 3 | KEDLEAEEEEYSSLC[339]ELLGSPEQRPGM[147]QDPLSPK | 1 |
|                                                                                                                                                                                                      |      |      |       |      |   |   | 3 | RKSAFMAPVPTK                                 | 1 |
| RAS7_HUMAN (Q02833) Ras association domain-containing protein 7 (HRAS1-related cluster protein 1) [MASS=39945]                                                                                       | 0.00 | 8.04 | 1.18  | 0.00 | 1 | 1 | 3 | ERQLLPQEC[330]PVGAQATC[330]GQFASDVQFVLRR     | 1 |
|                                                                                                                                                                                                      |      |      |       |      |   |   | 3 | WC[339]C[339]FVM[147]LHADQDGEKLQALLRLVIELLER | 1 |
| RBCC1_HUMAN (Q8TDY2) RB1-inducible coiled-coil protein 1 [MASS=183060]                                                                                                                               | 0.00 | 9.60 | 1.02  | 0.00 | 1 | 6 | 3 | AELNKVTSLHNQAFEIEKNLK                        | 1 |
|                                                                                                                                                                                                      |      |      |       |      |   |   | 3 | GLEDRLYALDQM[147]IASC[339]GRLVNEQK           | 1 |
|                                                                                                                                                                                                      |      |      |       |      |   |   | 2 | VDSAMETSMMSVQENIHMLSEEK                      | 1 |
|                                                                                                                                                                                                      |      |      |       |      |   |   | 2 | TLMTIEKDQC[330]ISELISRHEEESNILK              | 1 |
|                                                                                                                                                                                                      |      |      |       |      |   |   | 3 | VEESLMMPAVFHTVASRTQLALEMYEVAKK               | 1 |
| RBL1_HUMAN (P28749) Retinoblastoma-like protein 1 (107 kDa retinoblastoma-associated protein) (PRB1) (P107) [MASS=120846]                                                                            | 0.00 | 1.40 | 1.68  | 0.00 | 1 | 1 | 2 | HLDQLLLC[339]AFYIM[147]AK                    | 1 |

|                                                                                                                                                                                       |      |       |      |      |   |   |   |                                             |   |
|---------------------------------------------------------------------------------------------------------------------------------------------------------------------------------------|------|-------|------|------|---|---|---|---------------------------------------------|---|
| RBL2_HUMAN (Q08999) Retinoblastoma-like protein 2 (130 kDa retinoblastoma-associated protein) (PRB2) (P130) (RBR-2) [MASS=128356]                                                     | *    | 2.90  | *    | *    | * | 1 | 3 | IFLGEDAEIIIIGTLCRC[339]LNAGSGTETAERVQMK     | 1 |
| RBM8A_HUMAN (Q9Y5S9) RNA-binding protein 8A (RNA-binding motif protein 8A) (Ribonucleoprotein RBM8A) (RNA-binding protein Y14) (Binder of OVCA1-1) (BOV-1) [MASS=19889]               | 0.00 | 27.59 | 6.01 | 0.00 | 1 | 2 | 2 | EAQAAMEGLNGQDLM[147]GQPISVDWC[339]FVR       | 1 |
|                                                                                                                                                                                       |      |       |      |      |   |   | 2 | ARMREDYDSVEQDGEDEPGPQR                      | 1 |
| RBP17_HUMAN (Q9H2T7) Ran-binding protein 17 [MASS=124375]                                                                                                                             | *    | 4.50  | *    | *    | * | 3 | 2 | TLQFLNDLSVGYILLKK                           | 1 |
|                                                                                                                                                                                       |      |       |      |      |   |   | 2 | ASLINSQPLPK                                 | 1 |
|                                                                                                                                                                                       |      |       |      |      |   |   | 2 | DVAEALRSDGNTEPC[339]SLDMM[147]S             | 1 |
| RDH13_HUMAN (Q8NBN7) Retinol dehydrogenase 13 (EC 1.1.1.-) [MASS=35932]                                                                                                               | 0.00 | 19.03 | 0.29 | 0.00 | 1 | 2 | 3 | DYVTGGAC[339]PSKATIPGKTVIVTGANTGIGK         | 1 |
|                                                                                                                                                                                       |      |       |      |      |   |   | 3 | M[147]SRYLLPLSALGTVAGAAVLLKDYVTGGAC[330]PSK | 1 |
| REC8L_HUMAN (O95072) Meiotic recombination protein REC8-like 1 (Cohesin Rec8p) [MASS=62613]                                                                                           | 0.00 | 4.57  | 0.36 | 0.00 | 1 | 1 | 3 | TPTLSGWLPELLGLWTHC[330]AQPPPK               | 1 |
| RELN_HUMAN (P78509) Reelin precursor (EC 3.4.21.-) [MASS=388399]                                                                                                                      | *    | 1.10  | *    | *    | * | 2 | 3 | ITLPLPPYTRSQATR                             | 1 |
|                                                                                                                                                                                       |      |       |      |      |   |   | 3 | C[339]GILSSGNLFFNEDGLRM[147]LMTR            | 1 |
| REM1_HUMAN (O75628) GTP-binding protein REM 1 (Rad and Gem-like GTP-binding protein 1) (GTPase-regulating endothelial cell sprouting) [MASS=32947]                                    | 0.00 | 7.72  | 6.26 | 0.00 | 1 | 1 | 2 | SWSQESC[339]LQGG SAYVIVYSIADR               | 1 |
| RFC5_HUMAN (P40937) Replication factor C subunit 5 (Replication factor C 36 kDa subunit) (RF-C 36 kDa subunit) (RFC36) (Activator 1 36 kDa subunit) (A1 36 kDa subunit) [MASS=38496]  | *    | 3.24  | *    | *    | * | 1 | 2 | ALVTLSSGDM[147]R                            | 1 |
| RFWD2_HUMAN (Q8NHY2) Ring finger and WD repeat domain protein 2 (EC 6.3.2.-) (Ubiquitin-protein ligase COP1) (Constitutive photomorphogenesis protein 1 homolog) (hCOP1) [MASS=80474] | *    | 3.42  | *    | *    | * | 1 | 3 | LTAHFEDLEQC[330]YFSTRMSRISDDSR              | 1 |
| RGS12_HUMAN (O14924) Regulator of G-protein signaling 12 (RGS12) [MASS=156356]                                                                                                        | *    | 4.77  | *    | *    | * | 3 | 2 | NHSATGEERTLGKSNSIK                          | 1 |
|                                                                                                                                                                                       |      |       |      |      |   |   | 3 | LSGEKEPLDLGAPISLDGQR                        | 1 |
|                                                                                                                                                                                       |      |       |      |      |   |   | 3 | SPLYQEC[330]ILAEVEGRALPDSQQVPSSPASK         | 1 |

|                                                                                                                                                                                                                                                            |      |       |      |      |   |   |   |                                            |   |
|------------------------------------------------------------------------------------------------------------------------------------------------------------------------------------------------------------------------------------------------------------|------|-------|------|------|---|---|---|--------------------------------------------|---|
| RHG07_HUMAN (Q96QB1) Rho-GTPase-activating protein 7 (Rho-type GTPase-activating protein 7) (Deleted in liver cancer 1 protein) (Dlc-1) (HP protein) (StAR-related lipid transfer protein 12) (StARD12) (START domain-containing protein 12) [MASS=122826] | *    | 5.41  | *    | *    | * | 2 | 3 | TNSVISVC[330]SSSNLAGNDDDFGSLPSPK           | 1 |
|                                                                                                                                                                                                                                                            |      |       |      |      |   |   | 3 | WHSFQSSHRPSLNSVSLQINC[330]QSVAQM[147]NLLQK | 1 |
| RHG12_HUMAN (Q8IWW6) Rho-GTPase-activating protein 12 [MASS=96254]                                                                                                                                                                                         | *    | 2.96  | *    | *    | * | 1 | 3 | GWSEELDERGHTLYTSDYTNEKWLK                  | 1 |
|                                                                                                                                                                                                                                                            |      |       |      |      |   |   | 2 | HFC[339]PNVPIILVGNK                        | 2 |
| RHOA_HUMAN (P61586) Transforming protein RhoA precursor (H12) [MASS=21768]                                                                                                                                                                                 | 1.00 | 13.47 | 0.75 | 0.13 | 7 | 2 | 2 | HFC[330]PNVPIILVGNK                        | 4 |
|                                                                                                                                                                                                                                                            |      |       |      |      |   |   | 2 | IGAFGYM[147]EC[339]SAK                     | 1 |
| RHOB_HUMAN (P62745) Rho-related GTP-binding protein RhoB precursor (H6) [MASS=22123]                                                                                                                                                                       | 0.96 | 7.14  | 0.71 | 0.03 | 2 | 1 | 2 | HFC[330]PNVPIILVANK                        | 2 |
| RHOC_HUMAN                                                                                                                                                                                                                                                 | 0.00 | 5.70  | *    | *    | * | 1 | 2 | ELAKMKQEPVR                                | 1 |
| RIC8A_HUMAN (Q9NPQ8) Synembryn-A (Protein Ric-8A) [MASS=59612]                                                                                                                                                                                             | *    | 3.21  | *    | *    | * | 1 | 2 | FIKYTYGYNAAGLLAAR                          | 1 |
| RIF1_HUMAN (Q5UIP0) Telomere-associated protein RIF1 (Rap1-interacting factor 1 homolog) [MASS=274464]                                                                                                                                                     | *    | 3.56  | *    | *    | * | 4 | 2 | SSLSNNEC[330]GSLDKTSPEMSNSNNDERK           | 1 |
|                                                                                                                                                                                                                                                            |      |       |      |      |   |   | 2 | M[147]ELSLENTVEGNAC[339]KVTESNLEK          | 1 |
|                                                                                                                                                                                                                                                            |      |       |      |      |   |   | 3 | SSLSNNEC[330]GSLDKTSPEM[147]SNSNNDER       | 1 |
|                                                                                                                                                                                                                                                            |      |       |      |      |   |   | 2 | EGTFSKSDSEK                                | 1 |
| RIMS1_HUMAN (Q86UR5) Regulating synaptic membrane exocytosis protein 1 (Rab3-interacting molecule 1) (RIM 1) [MASS=189071]                                                                                                                                 | *    | 3.72  | *    | *    | * | 3 | 2 | PPSPRIQIHASPENDRHSR                        | 1 |
|                                                                                                                                                                                                                                                            |      |       |      |      |   |   | 3 | DAPQVLPQGQSVKLWYDK                         | 1 |
|                                                                                                                                                                                                                                                            |      |       |      |      |   |   | 2 | TLC[330]SMHHLVPGGSAPPSPLLTRMHR             | 1 |
|                                                                                                                                                                                                                                                            |      |       |      |      |   |   | 2 | TLC[339]SM[147]HHLVPGGSAPPSPLLTRM[147]HR   | 1 |
| RL11_HUMAN (P62913) 60S ribosomal protein L11 (CLL-associated antigen KW-12) [MASS=20121]                                                                                                                                                                  | *    | 12.99 | *    | *    | * | 1 | 2 | KNNFSDTGNFGFGIQEHIDLGIK                    | 1 |
| RL18A_HUMAN (Q02543) 60S ribosomal protein L18a [MASS=20762]                                                                                                                                                                                               | *    | 9.09  | *    | *    | * | 1 | 2 | C[339]LPTPKC[330]HTPPLYRM[147]R            | 1 |
| RL1D1_HUMAN (O76021) Ribosomal L1 domain-containing protein 1 (Cellular senescence-inhibited gene protein) (Protein PBK1) (CATX-11) [MASS=54972]                                                                                                           | *    | 3.47  | *    | *    | * | 1 | 2 | HGIKTVSQIISLQTLKK                          | 1 |

|                                                                                                                                                                                         |      |       |      |      |   |   |   |                                                 |   |
|-----------------------------------------------------------------------------------------------------------------------------------------------------------------------------------------|------|-------|------|------|---|---|---|-------------------------------------------------|---|
| RLP24_HUMAN (Q9UHA3) Probable ribosome biogenesis protein RLP24 (Ribosomal protein L24-like) [MASS=19621]                                                                               | 0.00 | 11.04 | 1.73 | 0.00 | 1 | 1 | 2 | C[339]YFC[339]SGPIYPGHGM[147]M[147]FVR          | 1 |
| RN168_HUMAN (Q8IYW5) RING finger protein 168 [MASS=65020]                                                                                                                               | *    | 4.20  | *    | *    | * | 2 | 3 | TRPSNHGKELC[330]VLSHER                          | 2 |
| RNF37_HUMAN (O94941) RING finger protein 37 (Ubiquitin-conjugating enzyme 7-interacting protein 5) (U-box domain-containing protein 5) [MASS=58965]                                     | *    | 5.36  | *    | *    | * | 1 | 2 | GSRDKNR                                         | 1 |
| ROBO4_HUMAN (Q8WZ75) Roundabout homolog 4 precursor (Magic roundabout) [MASS=107457]                                                                                                    | 0.00 | 8.44  | 0.78 | 0.00 | 1 | 3 | 2 | GHAHDGQALSTDLGVYTC[339]EASNR                    | 1 |
| ROCK1_HUMAN (Q13464) Rho-associated protein kinase 1 (EC 2.7.11.1) (Rho-associated, coiled-coil-containing protein kinase 1) (p160 ROCK-1) (p160ROCK) (NY-REN-35 antigen) [MASS=158174] | 0.00 | 2.95  | 0.37 | 0.00 | 1 | 2 | 3 | PDWLEDM[147]EVSHTQRLGRGMPPWPPDSQISSQR           | 1 |
|                                                                                                                                                                                         |      |       |      |      |   |   | 3 | GHAHDGQALSTDLGVYTC[330]EASNRLGTAVSR             | 1 |
| ROCK1_HUMAN (Q13464) Rho-associated protein kinase 1 (EC 2.7.11.1) (Rho-associated, coiled-coil-containing protein kinase 1) (p160 ROCK-1) (p160ROCK) (NY-REN-35 antigen) [MASS=158174] | 0.00 | 2.95  | 0.37 | 0.00 | 1 | 2 | 2 | HQKELNDM[147]QAQLVEEC[339]AHR                   | 1 |
|                                                                                                                                                                                         |      |       |      |      |   |   | 2 | LLEFELAQLTKQYRGNQGM[147]R                       | 1 |
| RP1_HUMAN (P56715) Oxygen-regulated protein 1 (Retinitis pigmentosa RP1 protein) (Retinitis pigmentosa 1 protein) [MASS=240660]                                                         | *    | 0.70  | *    | *    | * | 1 | 3 | SSAISAGVIEITSQK                                 | 1 |
| RPC1_HUMAN (O14802) DNA-directed RNA polymerase III largest subunit (EC 2.7.7.6) (RPC155) (RPC1) [MASS=155748]                                                                          | 0.00 | 3.95  | 0.51 | 0.00 | 1 | 3 | 2 | SEFLC[330]C[330]QDSFLQEIKK                      | 1 |
|                                                                                                                                                                                         |      |       |      |      |   |   | 1 | FGLAKMK                                         | 1 |
|                                                                                                                                                                                         |      |       |      |      |   |   | 3 | DKYMRAQM[147]EPGSAVGALC[339]AQSIGEPGTQM[147]TLK | 1 |
| RPGF6_HUMAN (Q8TEU7) Rap guanine nucleotide exchange factor 6 (PDZ domain-containing guanine nucleotide exchange factor 2) (PDZ-GEF2) (RA-GEF-2) [MASS=179406]                          | *    | 2.81  | *    | *    | * | 2 | 2 | ASRESPLQFSLNGGSEK                               | 1 |
|                                                                                                                                                                                         |      |       |      |      |   |   | 3 | TRFSILPPKLFSDGGLSQQDDSIIVGTR                    | 1 |
| RPGR1_HUMAN (Q96KN7) X-linked retinitis pigmentosa GTPase regulator-interacting protein 1 (RPGR-interacting protein 1) [MASS=146679]                                                    | *    | 2.49  | *    | *    | * | 1 | 3 | VLETVEKVHGLATLIGAGGEEFGVLEYWM[147]RLR           | 1 |
| RS2_HUMAN (P15880) 40S ribosomal protein S2 (S4) (LLRep3 protein) [MASS=31324]                                                                                                          | 1.00 | 3.41  | 1.19 | 0.06 | 2 | 1 | 2 | IGKPHTVPC[339]K                                 | 1 |
|                                                                                                                                                                                         |      |       |      |      |   |   | 2 | IGKPHTVPC[330]K                                 | 1 |
| RS3A_HUMAN (P61247) 40S ribosomal protein S3a [MASS=29814]                                                                                                                              | *    | 9.89  | *    | *    | * | 2 | 1 | IASDGLK                                         | 1 |
|                                                                                                                                                                                         |      |       |      |      |   |   | 2 | M[147]C[330]SM[147]VKKWQTMIEAHVDVK              | 1 |

|                                                                                                                                                                                                                                                                                  |      |       |      |      |   |   |   |                                     |   |
|----------------------------------------------------------------------------------------------------------------------------------------------------------------------------------------------------------------------------------------------------------------------------------|------|-------|------|------|---|---|---|-------------------------------------|---|
| RS8_HUMAN (P62241) 40S ribosomal protein S8 [MASS=24074]                                                                                                                                                                                                                         | 0.00 | 5.80  | 0.91 | 0.00 | 1 | 1 | 3 | NC[330]IVLIDSTPYR                   | 1 |
|                                                                                                                                                                                                                                                                                  |      |       |      |      |   |   | 2 | NC[330]IVLIDSTPYR                   | 1 |
| RSF1_HUMAN (Q96T23) Remodeling and spacing factor 1 (Rsf-1) (Hepatitis B virus X-associated protein) (HBV pX-associated protein 8) (p325 subunit of RSF chromatin remodelling complex) [MASS=163004]                                                                             | *    | 3.56  | *    | *    | * | 2 | 2 | ISTITALGHEGKQLVNGEVSDER             | 1 |
|                                                                                                                                                                                                                                                                                  |      |       |      |      |   |   | 3 | EDSEFTKVEMDNLDNAQTSGIIEPSETK        | 1 |
| RTC1_HUMAN (O00442) RNA 3'-terminal phosphate cyclase (EC 6.5.1.4) (RNA-3'-phosphate cyclase) (RNA cyclase) [MASS=39337]                                                                                                                                                         | 0.00 | 7.10  | 0.19 | 0.00 | 1 | 1 | 2 | SEDEEDAADKDYIIEC[330]QGIGMTNPNL     | 1 |
| RTN1_HUMAN (Q16799) Reticulon-1 (Neuroendocrine-specific protein) [MASS=83617]                                                                                                                                                                                                   | *    | 2.71  | *    | *    | * | 1 | 2 | ILADPLDQM[147]KAEAYKYIDITR          | 1 |
| RTP2_HUMAN (Q5QGT7) Receptor-transporting protein 2 [MASS=26068]                                                                                                                                                                                                                 | 0.35 | 4.89  | 0.39 | 0.00 | 1 | 1 | 2 | M[147]C[330]TSLTTC[330]EWW          | 1 |
| RUVB1_HUMAN (Q9Y265) RuvB-like 1 (EC 3.6.1.-) (49 kDa TATA box-binding protein-interacting protein) (49 kDa TBP-interacting protein) (TIP49a) (Pontin 52) (Nuclear matrix protein 238) (NMP 238) (54 kDa erythrocyte cytosolic protein) (ECP-54) (TIP60-associated) [MASS=50228] | *    | 10.75 | *    | *    | * | 2 | 3 | YSVQLLTPANLLAKINGKDSIEK             | 1 |
|                                                                                                                                                                                                                                                                                  |      |       |      |      |   |   | 3 | AVLLAGPPGTGKTALALAIQELGSK           | 1 |
| S27A4_HUMAN (Q6P1M0) Long-chain fatty acid transport protein 4 (EC 6.2.1.-) (Fatty acid transport protein 4) (FATP-4) (Solute carrier family 27 member 4) [MASS=72064]                                                                                                           | *    | 3.58  | *    | *    | * | 1 | 3 | DPLFYLDAQKGRYVPLDQEAYSR             | 1 |
| S35B1_HUMAN (P78383) Solute carrier family 35 member B1 (UDP-galactose transporter-related protein 1) (UGTrel1) (hUGTrel1) [MASS=35759]                                                                                                                                          | 0.00 | 4.97  | 1.20 | 0.00 | 1 | 1 | 2 | SC[339]KPIPVMLLGVTLLK               | 1 |
|                                                                                                                                                                                                                                                                                  |      |       |      |      |   |   | 3 | WLYSNQIPASPNTPVPIHHSKNPSK           | 1 |
|                                                                                                                                                                                                                                                                                  |      |       |      |      |   |   | 2 | LRPRLSSILEEQLEETPK                  | 1 |
| SACS_HUMAN (Q9NZJ4) Sacsin [MASS=436973]                                                                                                                                                                                                                                         | 0.00 | 2.59  | 0.27 | 0.00 | 1 | 5 | 2 | ELLQNADDANATEC[330]SFLIDMR          | 1 |
|                                                                                                                                                                                                                                                                                  |      |       |      |      |   |   | 3 | NPSKLIIMKPIHEC[339]C[339]YC[339]DIK | 1 |
|                                                                                                                                                                                                                                                                                  |      |       |      |      |   |   | 3 | TILEEGQTC[330]VELIR                 | 1 |
| SAM50_HUMAN (Q9Y512) Sorting and assembly machinery component 50 homolog [MASS=51962]                                                                                                                                                                                            | 0.97 | 4.26  | 1.99 | 0.05 | 2 | 1 | 2 | THFFLNAGNLC[339]NLNYGEGPK           | 2 |

|                                                                                                                                                                                                                                                                             |      |       |       |      |   |   |   |                                           |   |
|-----------------------------------------------------------------------------------------------------------------------------------------------------------------------------------------------------------------------------------------------------------------------------|------|-------|-------|------|---|---|---|-------------------------------------------|---|
| SAPS2_HUMAN (O75170) SAPS domain family member 2 [MASS=101006]                                                                                                                                                                                                              | 0.00 | 2.05  | 13.52 | 0.00 | 1 | 1 | 2 | YPNTAC[339]ELLTC[339]DVPQISDR             | 1 |
| SAP_HUMAN (P07602) Proactivator polypeptide precursor [Contains: Saposin A (Protein A); Saposin B-Val; Saposin B (Sphingolipid activator protein 1) (SAP-1) (Cerebroside sulfate activator) (CSAct) (Dispersin) (Sulfatide/GM1 activator); Saposin C (Co-beta- [MASS=58112] | 1.00 | 2.10  | 1.02  | 0.22 | 5 | 1 | 2 | GC[339]SFLPDPYQK                          | 3 |
|                                                                                                                                                                                                                                                                             |      |       |       |      |   |   | 2 | GC[330]SFLPDPYQK                          | 2 |
| SAR1A_HUMAN (Q9NR31) GTP-binding protein SAR1a (COPII-associated small GTPase) [MASS=22367]                                                                                                                                                                                 | 0.00 | 16.16 | 0.61  | 0.00 | 1 | 2 | 2 | NYLPAINGIVFLVDC[330]ADHSR                 | 1 |
|                                                                                                                                                                                                                                                                             |      |       |       |      |   |   | 2 | PM[147]EVFMC[339]SVLKR                    | 1 |
| SATT_HUMAN (P43007) Neutral amino acid transporter A (SATT) (Alanine/serine/cysteine/threonine transporter) (ASCT1) [MASS=55723]                                                                                                                                            | 1.00 | 5.26  | 0.57  | 0.38 | 5 | 2 | 3 | C[330]IEENNGVDKR                          | 1 |
|                                                                                                                                                                                                                                                                             |      |       |       |      |   |   | 3 | GEQELAEVKVEAIPNC[330]K                    | 1 |
|                                                                                                                                                                                                                                                                             |      |       |       |      |   |   | 2 | C[339]IEENNGVDKR                          | 1 |
|                                                                                                                                                                                                                                                                             |      |       |       |      |   |   | 2 | C[330]IEENNGVDKR                          | 3 |
| SCN4A_HUMAN (P35499) Sodium channel protein type 4 subunit alpha (Sodium channel protein type IV subunit alpha) (Voltage-gated sodium channel subunit alpha Nav1.4) (Sodium channel protein, skeletal muscle subunit alpha) (SkM1) [MASS=208031]                            | *    | 0.44  | *     | *    | * | 1 | 1 | KHQEELEK                                  | 1 |
| SCN5A_HUMAN (Q14524) Sodium channel protein type 5 subunit alpha (Sodium channel protein type V subunit alpha) (Voltage-gated sodium channel subunit alpha Nav1.5) (Sodium channel protein, cardiac muscle alpha-subunit) (HH1) [MASS=227161]                               | *    | 3.97  | *     | *    | * | 4 | 3 | VLGESGEM[147]DALKIQM[147]EEKFM[147]AANPSK | 1 |
|                                                                                                                                                                                                                                                                             |      |       |       |      |   |   | 3 | PAALAAQQLPSC[330]IATPYSPPPPETEKVPPTTR     | 1 |
|                                                                                                                                                                                                                                                                             |      |       |       |      |   |   | 2 | PQLDLQASK                                 | 1 |
|                                                                                                                                                                                                                                                                             |      |       |       |      |   |   | 3 | RKHEEVSAM[147]VIQR                        | 1 |
| SCNND_HUMAN (P51172) Amiloride-sensitive sodium channel subunit delta (Epithelial Na <sup>+</sup> channel subunit delta) (Delta ENaC) (Nonvoltage-gated sodium channel 1 subunit delta) (SCNED) (Delta NaCH) [MASS=70274]                                                   | *    | 3.92  | *     | *    | * | 1 | 2 | TTSWGLLSLGALVALC[330]WQLGLLFFER           | 1 |

|                                                                                                                                                                                        |      |       |      |      |   |   |   |                                          |   |
|----------------------------------------------------------------------------------------------------------------------------------------------------------------------------------------|------|-------|------|------|---|---|---|------------------------------------------|---|
| SCOT_HUMAN (P55809) Succinyl-CoA:3-ketoacid-coenzyme A transferase 1, mitochondrial precursor (EC 2.8.3.5) (Somatic-type succinyl CoA:3-oxoacid CoA-transferase) (Scot-S) [MASS=56157] | 1.00 | 10.77 | 1.34 | 0.08 | 4 | 4 | 2 | STGC[339]DFAVSPK                         | 1 |
|                                                                                                                                                                                        |      |       |      |      |   |   | 3 | DIPDGATVLVGGFGLC[330]GIPENLIDALLK        | 1 |
|                                                                                                                                                                                        |      |       |      |      |   |   | 2 | STGC[330]DFAVSPK                         | 1 |
|                                                                                                                                                                                        |      |       |      |      |   |   | 2 | LMPMQQIAN                                | 1 |
|                                                                                                                                                                                        |      |       |      |      |   |   | 2 | NFNLPM[147]C[339]JK                      | 1 |
|                                                                                                                                                                                        |      |       |      |      |   |   | 3 | LGRPTLSSEVGIIIC[330]DIANPASLDEM[147]AK   | 1 |
| SCPDH_HUMAN (Q8NBX0) Probable saccharopine dehydrogenase (EC 1.5.1.9) [MASS=47151]                                                                                                     | 1.00 | 12.12 | 1.01 | 0.03 | 4 | 2 | 3 | LGRPTLSSEVGIIIC[339]DIANPASLDEM[147]AK   | 3 |
|                                                                                                                                                                                        |      |       |      |      |   |   | 2 | QIDAASFLLTFFGQGYSGTGTDK                  | 1 |
| SDC1_HUMAN (P18827) Syndecan-1 precursor (SYND1) (CD138 antigen) [MASS=32476]                                                                                                          | 0.00 | 8.71  | 1.23 | 0.00 | 1 | 1 | 3 | EVLGGVIAGGLVGLIFAVC[339]LVGFMLYR         | 2 |
| SDHL_HUMAN (P20132) L-serine dehydratase (EC 4.3.1.17) (L-serine deaminase) [MASS=34702]                                                                                               | *    | 6.71  | *    | *    | * | 1 | 2 | TPLPSLVVIVC[339]GGSNISLAQLR              | 1 |
| SEM3C_HUMAN (Q99985) Semaphorin-3C precursor (Semaphorin E) (Sema E) [MASS=85207]                                                                                                      | *    | 2.13  | *    | *    | * | 1 | 2 | TIC[330]VLGVFIC[339]SIC[330]VK           | 1 |
| SEM3D_HUMAN (O95025) Semaphorin-3D precursor [MASS=89651]                                                                                                                              | *    | 4.76  | *    | *    | * | 2 | 3 | THIYVC[330]GTGAFHPIC[339]GYIDLGVYKEDIIFK | 1 |
|                                                                                                                                                                                        |      |       |      |      |   |   | 2 | RHSVM[147]YK                             | 1 |
| SEM4F_HUMAN (O95754) Semaphorin-4F precursor (Semaphorin W) (Sema W) (Semaphorin M) (Sema M) [MASS=83511]                                                                              | *    | 4.81  | *    | *    | * | 1 | 3 | DKVGLDLGAPPSGTTSYSQDPPSPSPEDERLPLALAK    | 1 |
| SEM5B_HUMAN (Q9P283) Semaphorin-5B precursor [MASS=119866]                                                                                                                             | *    | 1.74  | *    | *    | * | 1 | 3 | VPLERC[330]AAYRSQGAC[339]LGAR            | 1 |
| SEPT5_HUMAN (Q99719) Septin-5 (Peanut-like protein 1) (Cell division control-related protein 1) (CDCrel-1) [MASS=42777]                                                                | 0.97 | 2.71  | 1.16 | 0.00 | 1 | 1 | 2 | AHC[330]IQQM[147]TSK                     | 1 |
| SEPT7_HUMAN (Q16181) Septin-7 (CDC10 protein homolog) [MASS=50680]                                                                                                                     | 1.00 | 3.20  | 0.93 | 0.02 | 3 | 1 | 2 | ADTLTPEEC[330]QQFKK                      | 1 |
|                                                                                                                                                                                        |      |       |      |      |   |   | 2 | ADTLTPEEC[339]QQFKK                      | 2 |
|                                                                                                                                                                                        |      |       |      |      |   |   | 3 | AVLNPNPM[147]DFC[339]TKDLLTTTTSER        | 1 |
|                                                                                                                                                                                        |      |       |      |      |   |   | 2 | VPQPVPLIAQKPVGEM[147]K                   | 1 |
|                                                                                                                                                                                        |      |       |      |      |   |   | 2 | C[330]GSETHHTRR                          | 1 |
| SETX_HUMAN (Q7Z333) Probable helicase senataxin (EC 3.6.1.-) (SEN1 homolog) [MASS=302951]                                                                                              | *    | 4.71  | *    | *    | * | 8 | 2 | DMHC[339]LEASSPTFSKEPMK                  | 1 |
|                                                                                                                                                                                        |      |       |      |      |   |   | 2 | AIETAYAMVK                               | 1 |
|                                                                                                                                                                                        |      |       |      |      |   |   | 2 | QRALC[330]RGGR                           | 1 |
|                                                                                                                                                                                        |      |       |      |      |   |   | 3 | VNELC[330]VEALC[339]RMEQANC[339]SFQVFDK  | 1 |
|                                                                                                                                                                                        |      |       |      |      |   |   | 2 | GPAEVDTVDAFQGRQK                         | 1 |

|                                                                                                                                                                                                                                                                              |      |       |      |      |   |   |   |                                                |   |
|------------------------------------------------------------------------------------------------------------------------------------------------------------------------------------------------------------------------------------------------------------------------------|------|-------|------|------|---|---|---|------------------------------------------------|---|
| SF01_HUMAN (Q15637) Splicing factor 1 (Zinc finger protein 162) (Transcription factor ZFM1) (Zinc finger gene in MEN1 locus) (Mammalian branch point-binding protein mBBP) (BBP) [MASS=68198]                                                                                | 0.27 | 1.88  | 1.47 | 0.00 | 1 | 1 | 2 | C[339]GGAGHIASDC[339]K                         | 1 |
| SFTPD_HUMAN (P35247) Pulmonary surfactant-associated protein D precursor (SP-D) (PSP-D) [MASS=37698]                                                                                                                                                                         | *    | 6.93  | *    | *    | * | 1 | 2 | GDTGPGSGPPGPPGVPGPAGREGPLGK                    | 1 |
| SFXN1_HUMAN (Q9H9B4) Sideroflexin-1 (Tricarboxylate carrier protein) (TCC) [MASS=35488]                                                                                                                                                                                      | *    | 6.54  | *    | *    | * | 1 | 2 | IVHDYRQGVIPPLTENELWR                           | 1 |
| SFXN3_HUMAN (Q9BWM7) Sideroflexin-3 [MASS=35503]                                                                                                                                                                                                                             | *    | 15.89 | *    | *    | * | 2 | 3 | QGIFQVVISRIC[330]M[147]AIPAMAIPPLIM[147]DTLEKK | 1 |
|                                                                                                                                                                                                                                                                              |      |       |      |      |   |   | 2 | IC[330]MAIPAMAIPPLIMDTLEK                      | 1 |
|                                                                                                                                                                                                                                                                              |      |       |      |      |   |   | 2 | LNVSLASKIK                                     | 1 |
| SGOL2_HUMAN (Q562F6) Shugoshin-like 2 (Tripin) [MASS=144738]                                                                                                                                                                                                                 | *    | 5.14  | *    | *    | * | 4 | 2 | EPSLRDKMR                                      | 1 |
|                                                                                                                                                                                                                                                                              |      |       |      |      |   |   | 2 | KTSIDPSPESHEVM[147]ERILDSVQGK                  | 1 |
|                                                                                                                                                                                                                                                                              |      |       |      |      |   |   | 2 | KTEIIEVNHLDNDKSIEYTVK                          | 1 |
| SH2D5_HUMAN (Q6ZV89) SH2 domain-containing protein 5 [MASS=37439]                                                                                                                                                                                                            | 0.00 | 6.78  | 3.61 | 0.00 | 1 | 1 | 2 | DVLGAFLLWPELGASGQWC[339]LSVR                   | 1 |
|                                                                                                                                                                                                                                                                              |      |       |      |      |   |   | 2 | ATPQHTVSFTC[330]ESHGFSPR                       | 2 |
|                                                                                                                                                                                                                                                                              |      |       |      |      |   |   | 3 | ATPQHTVSFTC[330]ESHGFSPR                       | 1 |
| SHPS1_HUMAN (P78324) Tyrosine-protein phosphatase non-receptor type substrate 1 precursor (SHP substrate 1) (SHPS-1) (Inhibitory receptor SHPS-1) (Signal-regulatory protein alpha-1) (Sirp-alpha-1) (Sirp-alpha-2) (Sirp-alpha-3) (MyD-1 antigen) (Brain Ig-I) [MASS=54812] | 1.00 | 16.10 | 0.45 | 0.21 | 9 | 4 | 3 | ATPQHTVSFTC[339]ESHGFSPR                       | 1 |
|                                                                                                                                                                                                                                                                              |      |       |      |      |   |   | 3 | NAREITQDTNDITYADLNLPKGK                        | 1 |
|                                                                                                                                                                                                                                                                              |      |       |      |      |   |   | 2 | ATPQHTVSFTC[339]ESHGFSPR                       | 1 |
|                                                                                                                                                                                                                                                                              |      |       |      |      |   |   | 3 | LTC[339]QVEHDGQPAVSK                           | 1 |
|                                                                                                                                                                                                                                                                              |      |       |      |      |   |   | 3 | ATPQHTVSFTC[330]ESHGFSPRDITLK                  | 1 |
|                                                                                                                                                                                                                                                                              |      |       |      |      |   |   | 3 | LTC[330]QVEHDGQPAVSK                           | 2 |
|                                                                                                                                                                                                                                                                              |      |       |      |      |   |   | 2 | LTC[339]QVEHDGQPAVSK                           | 1 |
|                                                                                                                                                                                                                                                                              |      |       |      |      |   |   | 2 | LTC[330]QVEHDGQPAVSK                           | 3 |
| SIDT1_HUMAN (Q9NXL6) SID1 transmembrane family member 1 precursor [MASS=93866]                                                                                                                                                                                               | 0.00 | 2.54  | 1.66 | 0.00 | 1 | 1 | 2 | LALLC[339]ALPWLLLAASPGHPAK                     | 1 |
| SIM2_HUMAN (Q14190) Single-minded homolog 2 [MASS=73218]                                                                                                                                                                                                                     | *    | 3.90  | *    | *    | * | 2 | 3 | FGEDTAPPSFPSC[330]GHYR                         | 1 |
|                                                                                                                                                                                                                                                                              |      |       |      |      |   |   | 3 | LYSNMFM[147]FR                                 | 1 |
| SIRB1_HUMAN (O00241) Signal-regulatory protein beta-1 precursor (SIRP-beta-1) (CD172b antigen) [MASS=43255]                                                                                                                                                                  | 0.00 | 8.29  | 0.50 | 0.31 | 2 | 2 | 3 | GLQLTWLENGVSR                                  | 1 |
|                                                                                                                                                                                                                                                                              |      |       |      |      |   |   | 3 | ATPEHTVSFTC[330]ESHGFSPR                       | 2 |
|                                                                                                                                                                                                                                                                              |      |       |      |      |   |   | 2 | ATPEHTVSFTC[330]ESHGFSPR                       | 1 |



|                                                                                                                                                                                                                                 |      |       |      |      |   |   |   |                                               |   |
|---------------------------------------------------------------------------------------------------------------------------------------------------------------------------------------------------------------------------------|------|-------|------|------|---|---|---|-----------------------------------------------|---|
| SIRT2_HUMAN (Q8IXJ6) NAD-dependent deacetylase sirtuin-2 (EC 3.5.1.-) (SIR2-like) (SIR2-like protein 2) [MASS=43182]                                                                                                            | 0.31 | 11.31 | 1.66 | 0.00 | 1 | 2 | 3 | C[339]EDC[339]QSLVKPDIVFFGESLPAR              | 1 |
|                                                                                                                                                                                                                                 |      |       |      |      |   |   | 2 | VDLLLVM[147]GTSLQVQPFASLISK                   | 1 |
| SIVA_HUMAN (O15304) Apoptosis regulatory protein Siva (CD27-binding protein) (CD27BP) [MASS=18695]                                                                                                                              | 0.00 | 15.43 | 1.89 | 0.00 | 1 | 2 | 2 | YSQEVFEK                                      | 1 |
|                                                                                                                                                                                                                                 |      |       |      |      |   |   | 2 | SC[330]PFADVAPLQLKVRVSQR                      | 1 |
| SIX4_HUMAN (Q9UIU6) Homeobox protein SIX4 (Sine oculis homeobox homolog 4) [MASS=80832]                                                                                                                                         | *    | 2.76  | *    | *    | * | 1 | 3 | ENFLSNSESKATSSLMMLDSK                         | 1 |
| SKIV2_HUMAN (Q15477) Helicase SKI2W (EC 3.6.1.-) (Helicase-like protein) (HLP) [MASS=137798]                                                                                                                                    | 0.00 | 7.30  | 0.50 | 0.00 | 1 | 4 | 2 | GRC[330]DEQASGLTSLDLTTSSEK                    | 1 |
|                                                                                                                                                                                                                                 |      |       |      |      |   |   | 2 | C[339]DEQASGLTSLDLTTSSEK                      | 1 |
|                                                                                                                                                                                                                                 |      |       |      |      |   |   | 3 | TDPWLLAVLGAPVPSDLQAQR                         | 1 |
|                                                                                                                                                                                                                                 |      |       |      |      |   |   | 3 | GLVKVLFATETFAMGVNM[147]PARTVVFDMSR            | 1 |
| SLIK2_HUMAN (Q9H156) SLIT and NTRK-like protein 2 precursor [MASS=95404]                                                                                                                                                        | 0.00 | 4.73  | 0.50 | 0.00 | 1 | 2 | 2 | ELPSAGLVHYNFC[330]TLPKR                       | 1 |
|                                                                                                                                                                                                                                 |      |       |      |      |   |   | 3 | MLSGVWFLSVLTVAGILQTESR                        | 1 |
| SLIT1_HUMAN (O75093) Slit homolog 1 protein precursor (Slit-1) (Multiple epidermal growth factor-like domains 4) [MASS=167924]                                                                                                  | 0.00 | 5.35  | 1.10 | 0.00 | 1 | 4 | 2 | AIQTLHLAQNPFC[339]DC[330]NLK                  | 1 |
|                                                                                                                                                                                                                                 |      |       |      |      |   |   | 2 | GLTAIPANLPETM[147]TEIRLELNGIK                 | 1 |
|                                                                                                                                                                                                                                 |      |       |      |      |   |   | 3 | QRPTIGLFTQC[330]SGPASLR                       | 1 |
|                                                                                                                                                                                                                                 |      |       |      |      |   |   | 3 | VLQLMENQIGAVERGAFDDM[147]K                    | 1 |
| SLUR1_HUMAN (P55000) Secreted Ly-6/uPAR-related protein 1 precursor (SLURP-1) (ARS component B) (ARS(Component B)-81/S) (Anti-neoplastic urinary protein) (ANUP) [MASS=11186]                                                   | 0.00 | 61.17 | 1.22 | 0.00 | 1 | 3 | 3 | SC[339]SSSC[330]VATDPDSIGAAHLIFC[330]C[330]FR | 1 |
|                                                                                                                                                                                                                                 |      |       |      |      |   |   | 2 | C[330]YTC[339]KEPM[147]TSASC[330]R            | 1 |
|                                                                                                                                                                                                                                 |      |       |      |      |   |   | 2 | M[147]ASRWAVQLLLVAAWSM[147]GC[339]GEALK       | 1 |
| SMBT2_HUMAN (Q5VUG0) Scm-like with four MBT domains protein 2 [MASS=100562]                                                                                                                                                     | 0.00 | 5.03  | 0.84 | 0.00 | 1 | 2 | 2 | KIAVVQPEKQLPPTVPVK                            | 1 |
|                                                                                                                                                                                                                                 |      |       |      |      |   |   | 2 | IFQEQDIDGQALLLTLPTVQEC[330]M[147]ELK          | 1 |
| SMCA1_HUMAN (P28370) Probable global transcription activator SNF2L1 (EC 3.6.1.-) (ATP-dependent helicase SMARCA1) (SWI/SNF-related matrix-associated actin-dependent regulator of chromatin subfamily A member 1) [MASS=114731] | *    | 0.61  | *    | *    | * | 1 | 2 | GYEYC[339]R                                   | 1 |
| SMCE1_HUMAN (Q969G3) SWI/SNF-related matrix-associated actin-dependent regulator of chromatin subfamily E member 1 (BRG1-associated factor 57) [MASS=46649]                                                                     | *    | 3.65  | *    | *    | * | 1 | 2 | KFLESTDSFNNELKR                               | 1 |

|                                                                                                                                                                                                                                                                              |      |       |      |      |   |   |   |                                              |   |
|------------------------------------------------------------------------------------------------------------------------------------------------------------------------------------------------------------------------------------------------------------------------------|------|-------|------|------|---|---|---|----------------------------------------------|---|
| SMOC1_HUMAN (Q9H4F8) SPARC-related modular calcium-binding protein 1 precursor (Secreted modular calcium-binding protein 1) (SMOC-1) [MASS=48162]                                                                                                                            | 0.00 | 11.52 | 0.45 | 0.00 | 1 | 2 | 3 | TPVC[330]SGSVTDKPLSQGNSGRK                   | 1 |
|                                                                                                                                                                                                                                                                              |      |       |      |      |   |   | 3 | M[147]EFITSLLDALTTDM[147]VQAINSAAPTGGGR      | 1 |
| SMRA3_HUMAN (Q14527) SWI/SNF-related matrix-associated actin-dependent regulator of chromatin subfamily A member 3 (EC 3.6.1.-) (Sucrose nonfermenting protein 2-like 3) (DNA-binding protein/plasminogen activator inhibitor 1 regulator) (Helicase-like tran [MASS=113928] | 0.00 | 7.04  | 0.84 | 0.00 | 1 | 4 | 2 | C[330]SEQPSISDIKEKSK                         | 1 |
|                                                                                                                                                                                                                                                                              |      |       |      |      |   |   | 1 | TSKIKGK                                      | 1 |
|                                                                                                                                                                                                                                                                              |      |       |      |      |   |   | 3 | RVESIQC[330]FQNTTEAGSPTIM[147]LLSLK          | 1 |
|                                                                                                                                                                                                                                                                              |      |       |      |      |   |   | 3 | EPALLSKQDIVLTTYNILTHDYGTK                    | 1 |
| SMRC2_HUMAN (Q8TAQ2) SWI/SNF-related matrix-associated actin-dependent regulator of chromatin subfamily C member 2 (SWI/SNF complex 170 kDa subunit) (BRG1-associated factor 170) [MASS=132878]                                                                              | 0.00 | 5.02  | 1.92 | 0.00 | 1 | 3 | 3 | DGGPNVKYEEAADTVTQFDNVR                       | 1 |
|                                                                                                                                                                                                                                                                              |      |       |      |      |   |   | 3 | EEEQEDLTKDMDEPSPVPNVVEEVTLPK                 | 1 |
|                                                                                                                                                                                                                                                                              |      |       |      |      |   |   | 2 | RNLAGDVC[339]AIMR                            | 1 |
| SMYD5_HUMAN (Q6GMV2) SET and MYND domain-containing protein 5 (Protein NN8-4AG) [MASS=47340]                                                                                                                                                                                 | *    | 3.35  | *    | *    | * | 1 | 3 | ARVSVEVRFVSSAK                               | 1 |
| SNAAL_HUMAN (P54920) Alpha-soluble NSF attachment protein (SNAP-alpha) (N-ethylmaleimide-sensitive factor attachment protein, alpha) [MASS=33247]                                                                                                                            | *    | 17.97 | *    | *    | * | 2 | 2 | NSQSFFSGLFGGSSKIEEAC[339]EIYAR               | 1 |
|                                                                                                                                                                                                                                                                              |      |       |      |      |   |   | 2 | HDAATC[330]FVDAGNAFKKADPQEAINC[330]LMR       | 1 |
| SNAB_HUMAN (Q9H115) Beta-soluble NSF attachment protein (SNAP-beta) (N-ethylmaleimide-sensitive factor attachment protein, beta) [MASS=33557]                                                                                                                                | *    | 7.72  | *    | *    | * | 2 | 2 | VKASHSFLR                                    | 1 |
|                                                                                                                                                                                                                                                                              |      |       |      |      |   |   | 1 | AALC[339]HFIVDELNAK                          | 1 |
| SNG3_HUMAN (O43761) Synaptogyrin-3 [MASS=24555]                                                                                                                                                                                                                              | 0.00 | 4.80  | 0.90 | 0.00 | 1 | 1 | 2 | C[339]VFNGNAGAC[339]JR                       | 1 |
| SNX17_HUMAN (Q15036) Sorting nexin-17 [MASS=52901]                                                                                                                                                                                                                           | *    | 11.91 | *    | *    | * | 2 | 3 | SYWDSAYDDDVMENRVGLNLLYAQTVSDIER              | 1 |
|                                                                                                                                                                                                                                                                              |      |       |      |      |   |   | 2 | SYWDSAYDDDVMENRVGLNLLYAQTVSDIER              | 1 |
|                                                                                                                                                                                                                                                                              |      |       |      |      |   |   | 2 | SDSQAVKSPPLLESPDATRESM[147]VK                | 1 |
| SNX27_HUMAN (Q96L92) Sorting nexin-27 [MASS=50880]                                                                                                                                                                                                                           | *    | 3.45  | *    | *    | * | 1 | 3 | VALPDGTTVTVRVKK                              | 1 |
| SOCS5_HUMAN (O75159) Suppressor of cytokine signaling 5 (SOCS-5) (Cytokine-inducible SH2-containing protein 5) (Cytokine-inducible SH2 protein 6) (CIS-6) [MASS=61246]                                                                                                       | 0.00 | 6.34  | 0.16 | 0.00 | 1 | 1 | 3 | LAPGMTEISGDSSAIPQANC[330]DSEEDTTTLC[330]LQSR | 1 |

|                                                                                                                                                                                                                                                                              |      |       |      |      |   |   |   |                                          |   |
|------------------------------------------------------------------------------------------------------------------------------------------------------------------------------------------------------------------------------------------------------------------------------|------|-------|------|------|---|---|---|------------------------------------------|---|
| SODC_HUMAN (P00441) Superoxide dismutase [Cu-Zn] (EC 1.15.1.1) [MASS=15804]                                                                                                                                                                                                  | 1.00 | 25.49 | 0.70 | 0.10 | 2 | 2 | 3 | GLTEGLHGFHVHEFGDNTAGC[330]TSAGPHFNPLSR   | 1 |
|                                                                                                                                                                                                                                                                              |      |       |      |      |   |   | 2 | GLTEGLHGFHVHEFGDNTAGC[330]TSAGPHFNPLSR   | 1 |
|                                                                                                                                                                                                                                                                              |      |       |      |      |   |   | 1 | VWGSIK                                   | 1 |
| SORL_HUMAN (Q92673) Sortilin-related receptor precursor (Sorting protein-related receptor containing LDLR class A repeats) (SorLA) (SorLA-1) (Low-density lipoprotein receptor relative with 11 ligand-binding repeats) (LDLR relative with 11 ligand-binding) [MASS=248440] | *    | 1.67  | *    | *    | * | 2 | 2 | QLWKSDDFGQTWIMIQEHVK                     | 1 |
|                                                                                                                                                                                                                                                                              |      |       |      |      |   |   | 3 | QQC[339]LFHSM[147]VC[330]DGIIQC[330]R    | 1 |
|                                                                                                                                                                                                                                                                              |      |       |      |      |   |   | 3 | PKSDTVDFHC[330]SK                        | 9 |
| SP110_HUMAN (Q9HB58) Sp110 nuclear body protein (Speckled 110 kDa) (Transcriptional coactivator Sp110) (Interferon-induced protein 41/75) [MASS=78504]                                                                                                                       | *    | 1.74  | *    | *    | * | 1 |   |                                          |   |
| SPAG8_HUMAN (Q99932) Sperm-associated antigen 8 (Sperm membrane protein 1) (SMP-1) (HSD-1) (Sperm membrane protein BS-84) [MASS=44818]                                                                                                                                       | 0.00 | 3.29  | 0.42 | 0.02 | 2 | 1 | 2 | EAM[147]LEMLLQHQC[330]K                  | 2 |
| SPAST_HUMAN (Q9UBP0) Spastin [MASS=67197]                                                                                                                                                                                                                                    | 0.45 | 16.07 | 0.93 | 0.00 | 1 | 4 | 3 | GSGGASNPVPPRPPPPC[330]LAPAPPAAGPAPPPEPHK | 1 |
|                                                                                                                                                                                                                                                                              |      |       |      |      |   |   | 2 | APSYSGLSMVSGVKQGSGPAPTTHKGTPK            | 1 |
|                                                                                                                                                                                                                                                                              |      |       |      |      |   |   | 3 | RSSGAAPAPASASAPAPVPGGEAERVR              | 1 |
|                                                                                                                                                                                                                                                                              |      |       |      |      |   |   | 1 | M[147]NSPGGR                             | 1 |
| SPG7_HUMAN (Q9UQ90) Paraplegin (EC 3.4.24.-) (Spastic paraplegia protein 7) [MASS=88135]                                                                                                                                                                                     | *    | 2.39  | *    | *    | * | 1 | 2 | VLQDNLDKLQALANALLEK                      | 1 |
| SPN90_HUMAN (Q9NZQ3) SH3 adapter protein SPIN90 (NCK-interacting protein with SH3 domain) (SH3 protein interacting with Nck, 90 kDa) (VacA-interacting protein, 54 kDa) (VIP54) (AF3p21) (Diaphanous protein-interacting protein) (Dia-interacting protein 1) [MASS=78960]   | 0.00 | 5.26  | 0.93 | 0.00 | 1 | 2 | 2 | RNEFESVLALVAYYQM[147]EHR                 | 1 |
|                                                                                                                                                                                                                                                                              |      |       |      |      |   |   | 2 | C[330]YLEELLHILTDADPEVC[330]K            | 1 |
| SPRC_HUMAN (P09486) SPARC precursor (Secreted protein acidic and rich in cysteine) (Osteonectin) (ON) (Basement-membrane protein 40) (BM-40) [MASS=34632]                                                                                                                    | *    | 3.63  | *    | *    | * | 1 | 3 | FFETC[339]DLNDNK                         | 1 |

|                                                                                                                                                                     |                        |       |      |      |   |   |   |                                               |   |
|---------------------------------------------------------------------------------------------------------------------------------------------------------------------|------------------------|-------|------|------|---|---|---|-----------------------------------------------|---|
| SPRE_HUMAN (P35270) Sepiapterin reductase (EC 1.1.1.153) (SPR) [MASS=28048]                                                                                         | 0.00                   | 11.88 | 1.47 | 0.00 | 1 | 1 | 3 | GFVDLSDSTQVNNYWALNLTSM[147]LC[339]LTSSVLK     | 1 |
| SPT6H_HUMAN (Q7KZ85) Transcription elongation factor SPT6 (hSPT6) (Tat-cotransactivator 2 protein) (Tat-CT2 protein) [MASS=199071]                                  | *                      | 2.90  | *    | *    | * | 3 | 2 | QGYGDKHITLYDIR                                | 1 |
|                                                                                                                                                                     |                        |       |      |      |   |   | 3 | IDIEKFSADLTC[330]RTSDLMDR                     | 1 |
|                                                                                                                                                                     |                        |       |      |      |   |   | 2 | GKPRIEYVTVTPEGFR                              | 1 |
| SPTA1_HUMAN (P02549) Spectrin alpha chain, erythrocyte (Erythroid alpha-spectrin) [MASS=279914]                                                                     | 0.00                   | 3.31  | 2.01 | 0.00 | 1 | 4 | 2 | QLLGSAAHAVEVFHREADDTK                         | 1 |
|                                                                                                                                                                     |                        |       |      |      |   |   | 3 | M[147]EENLSEPVHC[339]VSLNEIR                  | 1 |
|                                                                                                                                                                     |                        |       |      |      |   |   | 3 | EDM[147]KQALTPEQVSFC[339]ATHM[147]QQYMDPR     | 1 |
|                                                                                                                                                                     |                        |       |      |      |   |   | 2 | M[147]EQFPKETVVESSGPK                         | 1 |
|                                                                                                                                                                     |                        |       |      |      |   |   | 2 | M[147]EENLSEPVHC[330]VSLNEIR                  | 1 |
| SPTA2_HUMAN (Q13813) Spectrin alpha chain, brain (Spectrin, non-erythroid alpha chain) (Alpha-II spectrin) (Fodrin alpha chain) [MASS=284537]                       | *                      | 2.83  | *    | *    | * | 5 | 2 | RQQVLDTRYHR                                   | 1 |
|                                                                                                                                                                     |                        |       |      |      |   |   | 2 | HVQSKAIEARHASLM[147]K                         | 1 |
|                                                                                                                                                                     |                        |       |      |      |   |   | 1 | RNEVLDRWR                                     | 1 |
|                                                                                                                                                                     |                        |       |      |      |   |   | 2 | KHEALM[147]SDLSAYGSSIQALR                     | 1 |
|                                                                                                                                                                     |                        |       |      |      |   |   | 2 | DETDSKTASPWKSAR                               | 1 |
| SPTB1_HUMAN (P11277) Spectrin beta chain, erythrocyte (Beta-I spectrin) [MASS=246189]                                                                               | *                      | 2.90  | *    | *    | * | 2 | 3 | FDILDQEMKTLMTQIDGVNLAANSLVESGHPR              | 1 |
|                                                                                                                                                                     |                        |       |      |      |   |   | 3 | SAKDALLLWC[330]QMKTAGYPHVNVNFTSSWK            | 1 |
| SPTB2_HUMAN (Q01082) Spectrin beta chain, brain 1 (Spectrin, non-erythroid beta chain 1) (Beta-II spectrin) (Fodrin beta chain) [MASS=274629]                       | *                      | 2.96  | *    | *    | * | 4 | 2 | EGEDMIAEEHFGSEK                               | 1 |
|                                                                                                                                                                     |                        |       |      |      |   |   | 3 | DLVAIEAKLSDLQK                                | 1 |
|                                                                                                                                                                     |                        |       |      |      |   |   | 3 | M[147]AETVDTSEMVNGATEQR                       | 1 |
|                                                                                                                                                                     |                        |       |      |      |   |   | 3 | MRDM[147]GEM[147]VTQGQTDAQYMFLRQR             | 1 |
| SPTN2_HUMAN (O15020) Spectrin beta chain, brain 2 (Spectrin, non-erythroid beta chain 2) (Beta-III spectrin) [MASS=271293]                                          | 0.00                   | 3.68  | 0.57 | 0.00 | 1 | 4 | 3 | DEAEM[147]SSWLRVVNAAIATASSASGEPEEPVVPSTTR     | 1 |
|                                                                                                                                                                     |                        |       |      |      |   |   | 2 | RQETAEKWQEK                                   | 1 |
|                                                                                                                                                                     |                        |       |      |      |   |   | 2 | SIITYVATYYHYFSKM[147]KALAVEGK                 | 1 |
| 3                                                                                                                                                                   | KC[330]NAHYNLQNAFNLAEK | 1     |      |      |   |   |   |                                               |   |
| SPTN4_HUMAN (Q9H254) Spectrin beta chain, brain 3 (Spectrin, non-erythroid beta chain 3) (Beta-IV spectrin) [MASS=288983]                                           | *                      | 1.91  | *    | *    | * | 2 | 3 | M[147]QVAVQAAEGLLRQGNIGEQAEAVTR               | 1 |
|                                                                                                                                                                     |                        |       |      |      |   |   | 2 | KEEM[147]SAVLLVENHVLVAEVR                     | 1 |
| SSDH_HUMAN (P51649) Succinate semialdehyde dehydrogenase, mitochondrial precursor (EC 1.2.1.24) (NAD(+)-dependent succinic semialdehyde dehydrogenase) [MASS=57214] | 0.55                   | 5.79  | 1.60 | 0.00 | 1 | 1 | 3 | NFFEPTLLC[339]NVTQDM[147]LC[339]THEETFGLAPVIK | 1 |
| ST6B1_HUMAN (Q6IMI4) Sulfotransferase 6B1 (EC 2.8.2.-) [MASS=30511]                                                                                                 | *                      | 4.91  | *    | *    | * | 1 | 2 | EC[330]LAGTSLGAKLK                            | 1 |

|                                                                                                                                                                                                        |      |       |      |      |   |   |             |                                                                                   |             |
|--------------------------------------------------------------------------------------------------------------------------------------------------------------------------------------------------------|------|-------|------|------|---|---|-------------|-----------------------------------------------------------------------------------|-------------|
| STA13_HUMAN (Q9Y3M8) StAR-related lipid transfer protein 13 (StARD13) (START domain-containing protein 13) (46H23.2) (Deleted in liver cancer protein 2) (Rho GTPase-activating protein) [MASS=124967] | *    | 2.34  | *    | *    | * | 1 | 2           | VGDGNPLKLWKASVEVEAPPSVVLNR                                                        | 1           |
| STAR8_HUMAN (Q92502) StAR-related lipid transfer protein 8 (StARD8) (START domain-containing protein 8) [MASS=112600]                                                                                  | *    | 0.68  | *    | *    | * | 1 | 1           | SPDWYNK                                                                           | 1           |
| STF1_HUMAN (Q13285) Steroidogenic factor 1 (STF-1) (SF-1) (Adrenal 4-binding protein) (Steroid hormone receptor Ad4BP) (Fushi tarazu factor homolog 1) [MASS=51636]                                    | *    | 5.21  | *    | *    | * | 1 | 3           | DAQEKANAALLDYTLIC[339]HYPHC[330]GDK                                               | 1           |
| STIM2_HUMAN (Q9P246) Stromal interaction molecule 2 precursor [MASS=83971]                                                                                                                             | *    | 4.69  | *    | *    | * | 2 | 2<br>3      | MLVLGLLVAGAADGC[330]ELVPR<br>KM[147]MDEINYAKEEAC[339]R                            | 1<br>1      |
| STK35_HUMAN (Q8TDR2) Serine/threonine-protein kinase 35 (EC 2.7.11.1) (CLP-36-interacting kinase) (Clik1) (PDLIM1-interacting kinase 1) [MASS=44573]                                                   | *    | 5.24  | *    | *    | * | 1 | 2           | SFM[147]LQLTSAIAFLHKNHIVHR                                                        | 1           |
| STK39_HUMAN (Q9UEW8) STE20/SPS1-related proline-alanine-rich protein kinase (EC 2.7.11.1) (Ste-20-related kinase) (Serine/threonine-protein kinase 39) (DCHT) [MASS=59642]                             | 0.27 | 9.51  | 0.85 | 0.00 | 1 | 3 | 3<br>2<br>3 | DAYELQEVIGSGATAVVQAALC[330]K<br>KLLSLC[339]LQK<br>DELWLVLM[147]KLLSGGSM[147]LDIIK | 1<br>1<br>1 |
|                                                                                                                                                                                                        |      |       |      |      |   |   | 2           | YSTHLHLAEDC[330]M[147]K                                                           | 3           |
|                                                                                                                                                                                                        |      |       |      |      |   |   | 2<br>3      | C[330]AYEVTQANGK<br>YSTHLHLAEDC[330]MKHYQGTVDK                                    | 1<br>1      |
| STXB1_HUMAN (P61764) Syntaxin-binding protein 1 (Unc-18 homolog) (Unc-18A) (Unc-18-1) (N-Sec1) (p67) [MASS=67568]                                                                                      | 1.00 | 20.71 | 0.62 | 0.07 | 9 | 7 | 2           | YSTHLHLAEDC[339]M[147]K<br>AAHVFFTDSC[330]PDALFNLVK                               | 3<br>2      |
|                                                                                                                                                                                                        |      |       |      |      |   |   | 2<br>2<br>2 | MTDIMTEGITIVEDINK<br>YETSGIGEARVKEVLLDEDDDLWIALR<br>DIM[147]EDTIEDKLDTK           | 1<br>1<br>1 |

|                                                                                                                                                                                                                                                 |                              |       |      |      |   |   |   |                                             |   |
|-------------------------------------------------------------------------------------------------------------------------------------------------------------------------------------------------------------------------------------------------|------------------------------|-------|------|------|---|---|---|---------------------------------------------|---|
| SUCA_HUMAN (P53597) Succinyl-CoA ligase [GDP-forming] alpha-chain, mitochondrial precursor (EC 6.2.1.4) (Succinyl-CoA synthetase, alpha chain) (SCS-alpha) [MASS=35047]                                                                         | 1.00                         | 4.80  | 1.20 | 0.06 | 3 | 1 | 2 | LIGPNC[339]PGVINPGEC[339]K                  | 1 |
|                                                                                                                                                                                                                                                 |                              |       |      |      |   |   | 2 | LIGPNC[330]PGVINPGEC[330]K                  | 2 |
| SUCB1_HUMAN (Q9P2R7) Succinyl-CoA ligase [ADP-forming] beta-chain, mitochondrial precursor (EC 6.2.1.5) (Succinyl-CoA synthetase, betaA chain) (SCS-betaA) (ATP-specific succinyl-CoA synthetase subunit beta) (NY-REN-39 antigen) [MASS=50317] | 0.99                         | 4.97  | 1.44 | 0.01 | 2 | 2 | 2 | IC[330]NQVLVC[330]ER                        | 1 |
|                                                                                                                                                                                                                                                 |                              |       |      |      |   |   | 2 | C[339]DVIAQGIVM[147]JAVK                    | 1 |
| SULF1_HUMAN (Q8IWU6) Extracellular sulfatase Sulf-1 precursor (EC 3.1.6.-) (HSulf-1) [MASS=101026]                                                                                                                                              | *                            | 1.61  | *    | *    | * | 1 | 3 | SVLKLLDPEKPGNR                              | 1 |
| SURF4_HUMAN (O15260) Surfeit locus protein 4 [MASS=30394]                                                                                                                                                                                       | 0.72                         | 4.83  | 0.63 | 0.00 | 1 | 1 | 2 | LC[339]LISTFLEDGIR                          | 1 |
| SUZ12_HUMAN (Q15022) Polycomb protein SUZ12 (Suppressor of zeste 12 protein homolog) (Joined to JAZF1 protein) (Chromatin precipitated E2F target 9 protein) (ChET 9 protein) [MASS=83053]                                                      | 0.00                         | 10.42 | 0.21 | 0.00 | 1 | 3 | 2 | NLC[330]RNFMLHLVSMHDFNLISIMSIDK             | 1 |
|                                                                                                                                                                                                                                                 |                              |       |      |      |   |   | 2 | M[147]APQKHGGGGGGGSGPSAGSGGGGFGGSAVAATASGGK | 1 |
|                                                                                                                                                                                                                                                 |                              |       |      |      |   |   | 3 | RTPITHILVC[339]R                            | 3 |
| SVIL_HUMAN (O95425) Supervillin (Archvillin) (p205/p250) [MASS=247705]                                                                                                                                                                          | *                            | 2.98  | *    | *    | * | 4 | 2 | PPLDHNASATDYK                               | 1 |
|                                                                                                                                                                                                                                                 |                              |       |      |      |   |   | 2 | REEEENVQSEWRLYC[339]VR                      | 1 |
|                                                                                                                                                                                                                                                 |                              |       |      |      |   |   | 3 | VQASKNPLKM[147]LAAR                         | 5 |
| SYGP1_HUMAN (Q96PV0) Ras GTPase-activating protein SynGAP (Synaptic Ras-GTPase-activating protein 1) (Synaptic Ras-GAP 1) (Neuronal RasGAP) [MASS=146675]                                                                                       | *                            | 4.14  | *    | *    | * | 2 | 2 | KGLASPTAITPVASAIC[330]GKTR                  | 1 |
|                                                                                                                                                                                                                                                 |                              |       |      |      |   |   | 3 | LSQSGSSITAAGM[147]RLSQMGVTTDGVPAQQLR        | 1 |
|                                                                                                                                                                                                                                                 |                              |       |      |      |   |   | 2 | FC[339]IISGNQLLMLDEDEIHPLLIR                | 1 |
| 3                                                                                                                                                                                                                                               | FC[339]IISGNQLLMLDEDEIHPLLIR | 1     |      |      |   |   |   |                                             |   |
| SYIC_HUMAN (P41252) Isoleucyl-tRNA synthetase, cytoplasmic (EC 6.1.1.5) (Isoleucine--tRNA ligase) (IleRS) (IRS) [MASS=144958]                                                                                                                   | *                            | 1.82  | *    | *    | * | 1 | 2 | VENM[147]VDQLLRNNDLC[330]YWVPELVR           | 1 |

|                                                                                                                                                                                                   |                                                                |      |      |      |   |    |   |                                              |                          |
|---------------------------------------------------------------------------------------------------------------------------------------------------------------------------------------------------|----------------------------------------------------------------|------|------|------|---|----|---|----------------------------------------------|--------------------------|
| SYIM_HUMAN (Q9NSE4) Isoleucyl-tRNA synthetase, mitochondrial precursor (EC 6.1.1.5) (Isoleucine--tRNA ligase) (IleRS) [MASS=113791]                                                               | *                                                              | 4.94 | *    | *    | * | 2  | 2 | TGWISTSSIWKKPGLEEAVESAC[339]AMR              | 1                        |
|                                                                                                                                                                                                   |                                                                |      |      |      |   |    | 2 | PGLEEAVESAC[339]AM[147]RDSFLGSIPGK           | 1                        |
|                                                                                                                                                                                                   |                                                                |      |      |      |   |    | 2 | MYHSLAGSLQDSGIVLK                            | 1                        |
|                                                                                                                                                                                                   |                                                                |      |      |      |   |    | 3 | FINDITTWFTKVEESLM[147]NC[339]AQNETC[339]EALK | 1                        |
|                                                                                                                                                                                                   |                                                                |      |      |      |   |    | 2 | QLGKALDDSRFQIQQTENIIR                        | 1                        |
| SYNE1_HUMAN (Q8NF91) Nesprin-1 (Nuclear envelope spectrin repeat protein 1) (Synaptic nuclear envelope protein 1) (Syne-1) (Myocyte nuclear envelope protein 1) (Myne-1) (Enaptin) [MASS=1011035] | *                                                              | 2.41 | *    | *    | * | 12 | 1 | VQYEMK                                       | 1                        |
|                                                                                                                                                                                                   |                                                                |      |      |      |   |    | 2 | TQFNNAVVKLRML[147]EQK                        | 1                        |
|                                                                                                                                                                                                   |                                                                |      |      |      |   |    | 3 | HFSESMQEFQEWFLGAK                            | 1                        |
|                                                                                                                                                                                                   |                                                                |      |      |      |   |    | 2 | HSELELNIAQNMVSQVK                            | 3                        |
|                                                                                                                                                                                                   |                                                                |      |      |      |   |    | 3 | QTVEATNSM[147]NKNESDLIEKDLNDALQNAK           | 1                        |
|                                                                                                                                                                                                   |                                                                |      |      |      |   |    | 2 | LQDM[147]YDELMM[147]IIGSR                    | 1                        |
|                                                                                                                                                                                                   |                                                                |      |      |      |   |    | 2 | HFKEDFDK                                     | 2                        |
|                                                                                                                                                                                                   |                                                                |      |      |      |   |    | 2 | ALQDLADLLETGQEKM[147]AGDQKIIVSSK             | 1                        |
|                                                                                                                                                                                                   |                                                                |      |      |      |   |    | 2 | MLHLVTLYHR                                   | 1                        |
|                                                                                                                                                                                                   | SYP2L_HUMAN (Q9H987) Synaptopodin 2-like protein [MASS=102468] | *    | 1.94 | *    | * | *  | 1 | 3                                            | TKC[330]RTIASLLTAAPNPHSK |
|                                                                                                                                                                                                   |                                                                |      |      |      |   |    | 1 | LHQVYFDAPTC[330]R                            | 1                        |
|                                                                                                                                                                                                   |                                                                |      |      |      |   |    | 2 | LHQVYFDAPTC[339]R                            | 3                        |
| SYPH_HUMAN (P08247) Synaptophysin (Major synaptic vesicle protein p38) [MASS=33845]                                                                                                               | 1.00                                                           | 3.83 | 0.62 | 0.11 | 9 | 1  | 2 | LHQVYFDAPTC[330]R                            | 5                        |
|                                                                                                                                                                                                   |                                                                |      |      |      |   |    |   |                                              |                          |
| SYQ_HUMAN (P47897) Glutaminyl-tRNA synthetase (EC 6.1.1.18) (Glutamine--tRNA ligase) (GlnRS) [MASS=87798]                                                                                         | 0.00                                                           | 2.32 | 5.89 | 0.00 | 1 | 1  | 2 | FFTAIC[339]DM[147]VAWLGYTPYK                 | 1                        |
|                                                                                                                                                                                                   |                                                                |      |      |      |   |    |   |                                              |                          |
| TALAN_HUMAN (Q70YC4) Talanin [MASS=24006]                                                                                                                                                         | 0.00                                                           | 5.56 | 1.77 | 0.00 | 1 | 1  | 2 | NPC[339]LHGAYLQLR                            | 1                        |
| TAU_HUMAN (P10636) Microtubule-associated protein tau (Neurofibrillary tangle protein) (Paired helical filament-tau) (PHF-tau) [MASS=78746]                                                       | 0.99                                                           | 7.40 | 1.88 | 0.00 | 1 | 3  | 2 | LQTAPVPM[147]PDLKNVSK                        | 1                        |
|                                                                                                                                                                                                   |                                                                |      |      |      |   |    | 2 | HQLLDLHQEGPPLKGAGGK                          | 1                        |
|                                                                                                                                                                                                   |                                                                |      |      |      |   |    | 3 | C[330]GSLGNIHHKPGGGQVEVK                     | 1                        |

|                                                                                                                                   |      |       |      |      |    |   |  |   |                                    |   |
|-----------------------------------------------------------------------------------------------------------------------------------|------|-------|------|------|----|---|--|---|------------------------------------|---|
|                                                                                                                                   |      |       |      |      |    |   |  | 2 | AYHEQLSVAEITNAC[330]FEPANQM[147]VK | 2 |
|                                                                                                                                   |      |       |      |      |    |   |  | 3 | AYHEQLSVAEITNAC[339]FEPANQM[147]VK | 4 |
|                                                                                                                                   |      |       |      |      |    |   |  | 2 | YM[147]AC[339]C[339]LLYR           | 4 |
| TBA1_HUMAN (P68366) Tubulin alpha-1 chain<br>(Alpha-tubulin 1) (Testis-specific alpha-tubulin)<br>(Tubulin H2-alpha) [MASS=49924] | 1.00 | 10.27 | 0.95 | 0.08 | 19 | 3 |  | 2 | SIQFVDWC[339]PTGFK                 | 1 |
|                                                                                                                                   |      |       |      |      |    |   |  | 3 | AYHEQLSVAEITNAC[330]FEPANQM[147]VK | 2 |
|                                                                                                                                   |      |       |      |      |    |   |  | 2 | YM[147]AC[330]C[330]LLYR           | 4 |
|                                                                                                                                   |      |       |      |      |    |   |  | 2 | AYHEQLSVAEITNAC[339]FEPANQM[147]VK | 2 |
| TBB1_HUMAN (Q9H4B7) Tubulin beta-1 chain<br>[MASS=50327]                                                                          | 0.00 | 2.00  | *    | *    | *  | 1 |  | 2 | VAVC[339]DIPPR                     | 1 |



|                                                                                   |      |       |   |   |   |  |   |   |                                                 |   |
|-----------------------------------------------------------------------------------|------|-------|---|---|---|--|---|---|-------------------------------------------------|---|
|                                                                                   |      |       |   |   |   |  |   | 3 | LTTPTYGDLNHLVSATM[147]SGVTTC[330]LR             | 3 |
|                                                                                   |      |       |   |   |   |  |   | 2 | NM[147]MAAC[330]DPR                             | 1 |
|                                                                                   |      |       |   |   |   |  |   | 2 | NM[147]M[147]AAC[330]DPRHGR                     | 1 |
|                                                                                   |      |       |   |   |   |  |   | 3 | KEAESC[339]DC[339]LQGFQLTHSLGGGTGSGMGTLLISK     | 1 |
|                                                                                   |      |       |   |   |   |  |   | 2 | LTTPTYGDLNHLVSATM[147]SGVTTC[339]LR             | 3 |
|                                                                                   |      |       |   |   |   |  |   | 2 | NMM[147]AAC[330]DPR                             | 1 |
|                                                                                   |      |       |   |   |   |  |   | 2 | LTTPTYGDLNHLVSATM[147]SGVTTC[330]LR             | 4 |
| TBB2C_HUMAN (P68371) Tubulin beta-2C<br>chain (Tubulin beta-2 chain) [MASS=49831] | 1.00 | 26.97 | * | * | * |  | 6 |   |                                                 |   |
|                                                                                   |      |       |   |   |   |  |   | 2 | NMM[147]AAC[339]DPR                             | 1 |
|                                                                                   |      |       |   |   |   |  |   | 2 | NM[147]M[147]AAC[330]DPR                        | 2 |
|                                                                                   |      |       |   |   |   |  |   | 3 | EAESC[330]DC[330]LQGFQLTHSLGGGTGSGM[147]GTLLISK | 1 |
|                                                                                   |      |       |   |   |   |  |   | 2 | TAVC[330]DIPPR                                  | 7 |
|                                                                                   |      |       |   |   |   |  |   | 3 | LTTPTYGDLNHLVSATM[147]SGVTTC[339]LR             | 2 |

|                                                                                |      |       |   |   |   |   |   |                                                  |   |
|--------------------------------------------------------------------------------|------|-------|---|---|---|---|---|--------------------------------------------------|---|
|                                                                                |      |       |   |   |   |   | 2 | TAVC[339]DIPPR                                   | 5 |
|                                                                                |      |       |   |   |   |   | 2 | NM[147]M[147]AAC[339]DPR                         | 4 |
| TBB2C_HUMAN (P68371) Tubulin beta-2C chain (Tubulin beta-2 chain) [MASS=49831] | 1.00 | 26.97 | * | * | * | 6 | 3 | EAESC[339]DC[339]LQGFQLTHSLGGGTGSGM[147]GTLLISK  | 3 |
|                                                                                |      |       |   |   |   |   | 3 | KEAESC[339]DC[339]LQGFQLTHSLGGGTGSGM[147]GTLLISK | 4 |
|                                                                                |      |       |   |   |   |   | 3 | KEAESC[330]DC[330]LQGFQLTHSLGGGTGSGM[147]GTLLISK | 2 |

|                                                                                                  |      |      |      |      |    |   |   |   |                                   |   |
|--------------------------------------------------------------------------------------------------|------|------|------|------|----|---|---|---|-----------------------------------|---|
|                                                                                                  |      |      |      |      |    |   |   | 2 | EIVHIQAGQC[339]GNQIGAK            | 3 |
|                                                                                                  |      |      |      |      |    |   |   | 2 | EIVHIQAGQC[330]GNQIGAK            | 8 |
| TBB2_HUMAN (P07437) Tubulin beta-2 chain [MASS=49671]                                            | 1.00 | 8.11 | 0.93 | 0.13 | 67 |   | 2 | 2 | M[147]REIVHIQAGQC[339]GNQIGAK     | 1 |
|                                                                                                  |      |      |      |      |    |   |   | 3 | EIVHIQAGQC[339]GNQIGAK            | 2 |
|                                                                                                  |      |      |      |      |    |   |   | 3 | M[147]REIVHIQAGQC[339]GNQIGAK     | 4 |
|                                                                                                  |      |      |      |      |    |   |   | 3 | MREIVHIQAGQC[330]GNQIGAK          | 2 |
|                                                                                                  |      |      |      |      |    |   |   | 3 | M[147]REIVHIQAGQC[330]GNQIGAK     | 3 |
|                                                                                                  |      |      |      |      |    |   |   | 3 | MREIVHIQAGQC[339]GNQIGAK          | 1 |
|                                                                                                  |      |      |      |      |    |   |   | 3 | EIVHIQAGQC[330]GNQIGAK            | 3 |
| TBB2_HUMAN (P07437) Tubulin beta-2 chain [MASS=49671]                                            | 1.00 | 8.11 | 0.93 | 0.13 | 67 |   | 2 | 2 | M[147]REIVHIQAGQC[330]GNQIGAK     | 3 |
| TBB3_HUMAN                                                                                       | 1.00 | 6.00 | 1.41 | 0.00 | 1  | 1 | 3 | 3 | FWEVISDEHGIDPSGNYVGDSDLQLER       | 1 |
| TBB6_HUMAN (Q9BUF5) Tubulin beta-6 chain [MASS=49857]                                            | 1.00 | 5.38 | *    | *    | *  | 1 | 3 | 3 | AALVDLEPGTM[147]DSVRSRGPFGQLFR    | 1 |
| TBCC_HUMAN (Q15814) Tubulin-specific chaperone C (Tubulin-folding cofactor C) (CFC) [MASS=39220] | 0.00 | 6.07 | 1.69 | 0.00 | 1  | 1 | 2 | 2 | RASELHQRDVLLTELSNC[339]TVR        | 1 |
| TBCD1_HUMAN (Q86TI0) TBC1 domain family member 1 [MASS=133083]                                   | *    | 3.25 | *    | *    | *  | 2 | 2 | 2 | PDMIIQIQM[147]YQLSR               | 1 |
|                                                                                                  |      |      |      |      |    |   |   | 2 | NFKEISFC[339]SQGIRHVDHFGFIC[330]R | 1 |

|                                                                                                                                                                                                             |      |       |      |      |   |   |   |                                               |   |
|-------------------------------------------------------------------------------------------------------------------------------------------------------------------------------------------------------------|------|-------|------|------|---|---|---|-----------------------------------------------|---|
| TCF20_HUMAN (Q9UGU0) Transcription factor 20 (Stromelysin 1 PDGF-responsive element-binding protein) (SPRE-binding protein) (Nuclear factor SPBP) (AR1) [MASS=211770]                                       | 0.00 | 4.23  | 1.48 | 0.00 | 1 | 4 | 2 | NRILQLMPQLSPTPSMMPSPNSHAAGFK                  | 1 |
|                                                                                                                                                                                                             |      |       |      |      |   |   | 2 | C[339]LMSSDGLPNKGMELK                         | 1 |
|                                                                                                                                                                                                             |      |       |      |      |   |   | 2 | LNPTLSQSVILPGGLVSMETKLK                       | 1 |
|                                                                                                                                                                                                             |      |       |      |      |   |   | 2 | C[330]SHC[339]QEAGATLGC[330]YNK               | 1 |
| TDRD5_HUMAN (Q8NAT2) Tudor domain-containing protein 5 [MASS=76592]                                                                                                                                         | *    | 5.13  | *    | *    | * | 2 | 2 | DSSELLEDM[147]MIEMR                           | 1 |
|                                                                                                                                                                                                             |      |       |      |      |   |   | 3 | SELNLAMANHDIPDAVPNKK                          | 1 |
| TENX_HUMAN (P22105) Tenascin-X precursor (TN-X) (Hexabrachion-like protein) [MASS=464454]                                                                                                                   | *    | 2.19  | *    | *    | * | 5 | 2 | MC[330]PADC[330]RGRGR                         | 1 |
|                                                                                                                                                                                                             |      |       |      |      |   |   | 2 | MNM[147]YGLHDGQRM[147]GPLSVVIVTAPATEASK       | 1 |
|                                                                                                                                                                                                             |      |       |      |      |   |   | 2 | VRGEESEVTVGGLEPGC[339]K                       | 1 |
|                                                                                                                                                                                                             |      |       |      |      |   |   | 2 | C[339]VC[339]NPGFTGEDC[339]GSRR               | 1 |
|                                                                                                                                                                                                             |      |       |      |      |   |   | 2 | C[339]EGGRC[330]VC[330]DPGYTGDDC[339]GMR      | 1 |
|                                                                                                                                                                                                             |      |       |      |      |   |   | 2 | LSLVTGQSGQGKTAFLASLVSALQAPDGAK                | 1 |
| TEP1_HUMAN (Q99973) Telomerase protein component 1 (Telomerase-associated protein 1) (Telomerase protein 1) (p240) (p80 telomerase homolog) [MASS=290413]                                                   | 0.00 | 5.75  | 1.35 | 0.00 | 1 | 8 | 3 | TLPKGTKSWEEAVAAGNSGDPYPM[147]GPFAC[339]LVQSLR | 1 |
|                                                                                                                                                                                                             |      |       |      |      |   |   | 3 | VWDHQGVELTSIPAHSGPISHC[330]AAAMEPR            | 1 |
|                                                                                                                                                                                                             |      |       |      |      |   |   | 2 | FEKAGDTVSEK                                   | 1 |
|                                                                                                                                                                                                             |      |       |      |      |   |   | 2 | ASLYARQQLNVR                                  | 1 |
|                                                                                                                                                                                                             |      |       |      |      |   |   | 1 | VGISSR                                        | 3 |
|                                                                                                                                                                                                             |      |       |      |      |   |   | 3 | TC[339]DADASGTFR                              | 1 |
|                                                                                                                                                                                                             |      |       |      |      |   |   | 2 | TVLVYLTDANADRLC[330]PK                        | 1 |
|                                                                                                                                                                                                             |      |       |      |      |   |   |   |                                               |   |
| TF3C1_HUMAN (Q12789) General transcription factor 3C polypeptide 1 (Transcription factor IIIC-subunit alpha) (TF3C-alpha) (TFIIIC 220 kDa subunit) (TFIIIC220) (TFIIIC box B-binding subunit) [MASS=238294] | *    | 2.09  | *    | *    | * | 2 | 3 | GYYSPIVSTRNLNPNDISIVVNSC[339]QMK              | 2 |
|                                                                                                                                                                                                             |      |       |      |      |   |   | 2 | ALPFVPM[147]SYQLSQTYR                         | 1 |
| TGBR3_HUMAN (Q03167) TGF-beta receptor type III precursor (TGFR-3) (Transforming growth factor beta receptor III) (Betaglycan) [MASS=93428]                                                                 | 0.00 | 5.53  | 2.79 | 0.00 | 1 | 2 | 2 | C[339]NIGKNFLSLNYLAEYLQPK                     | 1 |
|                                                                                                                                                                                                             |      |       |      |      |   |   | 3 | SVVFLNLSPLVWHLKTERLATGVSR                     | 1 |
| TGIF_HUMAN (Q15583) 5'-TG-3'-interacting factor (Homeobox protein TGIF) [MASS=43043]                                                                                                                        | 0.00 | 12.72 | 1.10 | 0.00 | 1 | 2 | 3 | LLETMKGIVAASGSETEDEDSMDIPLDLSSSAGSGK          | 1 |
|                                                                                                                                                                                                             |      |       |      |      |   |   | 3 | NFTDTSMLYPEDTC[339]K                          | 1 |
| TGT_HUMAN (Q9BXR0) Queuine tRNA-ribosyltransferase (EC 2.4.2.29) (tRNA-guanine transglycosylase) (Guanine insertion enzyme) [MASS=42492]                                                                    | 0.00 | 11.11 | 9.90 | 0.00 | 1 | 2 | 3 | GITTEQLDALGC[339]R                            | 1 |
|                                                                                                                                                                                                             |      |       |      |      |   |   | 3 | SRARAGELWLPHGTVATPVFM[147]PVGQTQATM[147]JK    | 1 |

|                                                                                                                                                                                     |      |       |      |      |   |   |   |                                                |   |
|-------------------------------------------------------------------------------------------------------------------------------------------------------------------------------------|------|-------|------|------|---|---|---|------------------------------------------------|---|
| THIK_HUMAN (P09110) 3-ketoacyl-CoA thiolase, peroxisomal precursor (EC 2.3.1.16) (Beta-ketothiolase) (Acetyl-CoA acyltransferase) (Peroxisomal 3-oxoacyl-CoA thiolase) [MASS=44292] | 0.00 | 6.84  | 1.14 | 0.00 | 1 | 2 | 3 | EKQDTFALASQQK                                  | 1 |
|                                                                                                                                                                                     |      |       |      |      |   |   | 2 | DC[330]LIPM[147]GITSENVNER                     | 1 |
| THIL_HUMAN (P24752) Acetyl-CoA acetyltransferase, mitochondrial precursor (EC 2.3.1.9) (Acetoacetyl-CoA thiolase) (T2) [MASS=45199]                                                 | 1.00 | 2.81  | 1.21 | 0.02 | 4 | 1 | 2 | IHM[147]GSC[339]AENTAK                         | 3 |
|                                                                                                                                                                                     |      |       |      |      |   |   | 2 | IHM[147]GSC[330]AENTAK                         | 1 |
| THIM_HUMAN (P42765) 3-ketoacyl-CoA thiolase, mitochondrial (EC 2.3.1.16) (Beta-ketothiolase) (Acetyl-CoA acyltransferase) (Mitochondrial 3-oxoacyl-CoA thiolase) (T1) [MASS=41924]  | 0.40 | 12.59 | 1.46 | 0.00 | 1 | 2 | 3 | DGTVTAGNASGVADGAGAVIIASEDAVKKHNFTPLAR          | 1 |
|                                                                                                                                                                                     |      |       |      |      |   |   | 2 | EEC[339]DKYALQSQQR                             | 1 |
| TIAM1_HUMAN (Q13009) T-lymphoma invasion and metastasis-inducing protein 1 (TIAM-1 protein) [MASS=177637]                                                                           | *    | 3.52  | *    | *    | * | 3 | 2 | WKHYWVSLK                                      | 1 |
|                                                                                                                                                                                     |      |       |      |      |   |   | 3 | SLHEM[147]NPSDQNPSPQDSTGSQLATM[147]RQLSDADNVRK | 1 |
|                                                                                                                                                                                     |      |       |      |      |   |   | 2 | LSIYEDWDPFR                                    | 1 |
| TIM9_HUMAN (Q9Y5J7) Mitochondrial import inner membrane translocase subunit Tim9 [MASS=10378]                                                                                       | 0.44 | 17.98 | 1.33 | 0.00 | 1 | 1 | 3 | EVKPEETTC[339]SEHC[339]LQK                     | 2 |
| TLK2_HUMAN (Q86UE8) Serine/threonine-protein kinase tousled-like 2 (EC 2.7.11.1) (Tousled-like kinase 2) (PKU-alpha) [MASS=87660]                                                   | *    | 1.42  | *    | *    | * | 1 | 3 | MAC[339]RDKSM[147]QDR                          | 3 |
| TLN2_HUMAN (Q9Y4G6) Talin-2 [MASS=271553]                                                                                                                                           | *    | 1.18  | *    | *    | * | 1 | 2 | VLGESM[147]AGISQNAKTGDLPAFGEC[339]VGIASK       | 1 |
| TMM22_HUMAN (Q8TBE7) Transmembrane protein 22 [MASS=46449]                                                                                                                          | 0.00 | 8.01  | 0.43 | 0.00 | 1 | 2 | 3 | SVFQVLSVLVVC[339]YYQEAPFGPSGYR                 | 1 |
|                                                                                                                                                                                     |      |       |      |      |   |   | 2 | KLLSEM                                         | 1 |
| TMPS7_HUMAN (Q7R7Y8) Transmembrane protease, serine 7 precursor (EC 3.4.21.-) [MASS=64041]                                                                                          | *    | 3.50  | *    | *    | * | 1 | 3 | DC[339]ENGRDEQNC[339]TQSIPC[330]NNR            | 1 |
| TMPS9_HUMAN (Q7Z410) Transmembrane protease, serine 9 (EC 3.4.21.-) (Polyserase-1) (Polyserase-I) (Polyserine protease 1) [Contains: Serase-1; Serase-2; Serase-3] [MASS=114020]    | 0.00 | 3.31  | 1.07 | 0.00 | 1 | 3 | 2 | LLSEQTC[330]JR                                 | 1 |
|                                                                                                                                                                                     |      |       |      |      |   |   | 2 | M[147]EPTVADVHLVPR                             | 1 |
|                                                                                                                                                                                     |      |       |      |      |   |   | 3 | VAAVRGWIGQHIQE                                 | 1 |

|                                                                                                                                                                                                                                                             |      |       |      |      |   |   |                                                                                                                                                                        |                       |   |
|-------------------------------------------------------------------------------------------------------------------------------------------------------------------------------------------------------------------------------------------------------------|------|-------|------|------|---|---|------------------------------------------------------------------------------------------------------------------------------------------------------------------------|-----------------------|---|
| TNF13_HUMAN (O75888) Tumor necrosis factor ligand superfamily member 13 precursor (A proliferation-inducing ligand) (APRIL) (TNF- and APOL-related leukocyte expressed ligand 2) (TALL-2) (TNF-related death ligand 1) (TRDL1) (CD256 antigen) [MASS=27433] | *    | 3.60  | *    | *    | * | 1 | 2                                                                                                                                                                      | AVLTQKQKK             | 1 |
| TNMD_HUMAN (Q9H2S6) Tenomodulin (TeM) (hTeM) (Chondromodulin-I-like protein) (ChM1L) (hChM1L) (Myodulin) (Tendin) [MASS=37130]                                                                                                                              | 0.00 | 8.52  | 1.58 | 0.00 | 1 | 1 | 3 IC[339]KSLKIC[330]GLVFGILALTLIVLFWGSK<br>3 IC[339]KSLKIC[339]GLVFGILALTLIVLFWGSK                                                                                     | 1<br>3                |   |
| TNR8_HUMAN (P28908) Tumor necrosis factor receptor superfamily member 8 precursor (CD30L receptor) (Lymphocyte activation antigen CD30) (KI-1 antigen) [MASS=63747]                                                                                         | 0.00 | 9.92  | 1.48 | 0.00 | 1 | 2 | 3 EPSSGTIPQAKPTVPSPATSSASTM[147]PVR<br>2 APDSPSSVGRPSSDPGLSPTQPC[330]PEGSGDC[330]R                                                                                     | 1<br>1                |   |
| TOM40_HUMAN (O96008) Probable mitochondrial import receptor subunit TOM40 homolog (Translocase of outer membrane 40 kDa subunit homolog) (Haymaker protein) (p38.5) [MASS=37893]                                                                            | 0.97 | 8.86  | 1.55 | 0.00 | 1 | 1 | 3 TPGAATASASGAAEDGAC[339]GC[339]LPNPGTFEEC[339]HR                                                                                                                      | 1                     |   |
| TOM70_HUMAN (O94826) Mitochondrial precursor proteins import receptor (Translocase of outer membrane TOM70) [MASS=67454]                                                                                                                                    | 1.00 | 17.27 | 1.12 | 0.22 | 4 | 5 | 3 SEM[147]EM[147]AHLYSLC[339]DAAHAQTEVAK<br>2 ILLDQVEEAVADFDEC[339]IR<br>3 EC[330]LEDVTAVC[330]ILEGFQNNQSMMLADK<br>3 C[330]IDLEPDNATTYVHKGLLQLQWKQDLDR<br>2 PESALAAQAK | 1<br>2<br>1<br>1<br>1 |   |
| TOP1M_HUMAN (Q969P6) DNA topoisomerase I, mitochondrial precursor (EC 5.99.1.2) (TOP1mt) [MASS=69871]                                                                                                                                                       | *    | 4.83  | *    | *    | * | 1 | 2 SDNTVTWLAAWTESVQNSIKYIM[147]LNPC[330]SK                                                                                                                              | 1                     |   |
| TOP1_HUMAN (P11387) DNA topoisomerase 1 (EC 5.99.1.2) (DNA topoisomerase I) [MASS=90725]                                                                                                                                                                    | *    | 3.79  | *    | *    | * | 2 | 3 FLEHKGPVFAPPYEPLPENVK<br>1 LNDSHKHK                                                                                                                                  | 1<br>1                |   |
| TP53B_HUMAN (Q12888) Tumor suppressor p53-binding protein 1 (p53-binding protein 1) (p53BP1) (53BP1) [MASS=213573]                                                                                                                                          | 0.00 | 4.97  | 1.17 | 0.00 | 1 | 5 | 2 TSSGTSLSAMHSSGSSGKAGPLR<br>2 EC[339]SEAMEVETSVISIDSPQK<br>3 VVAKWSSNGYFYSGK<br>3 RRSNVSSPATPTASSSSSTTPTR<br>2 WYKRM[147]AVILSLEQGNR                                  | 1<br>1<br>1<br>1<br>1 |   |

|                                                                                                                                                                                                                                                            |      |      |      |      |   |   |        |                                                              |        |
|------------------------------------------------------------------------------------------------------------------------------------------------------------------------------------------------------------------------------------------------------------|------|------|------|------|---|---|--------|--------------------------------------------------------------|--------|
| TPA_HUMAN (P00750) Tissue-type plasminogen activator precursor (EC 3.4.21.68) (tPA) (t-PA) (t-plasminogen activator) (Alteplase) (Reteplase) [Contains: Tissue-type plasminogen activator chain A; Tissue-type plasminogen activator chain B] [MASS=62917] | *    | 1.96 | *    | *    | * | 1 | 3      | RGARSYQVIC[339]R                                             | 2      |
| TPM2_HUMAN (P07951) Tropomyosin beta chain (Tropomyosin 2) (Beta-tropomyosin) [MASS=32851]                                                                                                                                                                 | *    | 4.58 | *    | *    | * | 1 | 2      | TIDDLEDEVYAQK                                                | 1      |
| TR11B_HUMAN (O00300) Tumor necrosis factor receptor superfamily member 11B precursor (Osteoprotegerin) (Osteoclastogenesis inhibitory factor) [MASS=46040]                                                                                                 | *    | 5.24 | *    | *    | * | 1 | 2      | SC[330]PPGFGVVQAGTPERNVC[339]K                               | 1      |
| TR2_HUMAN (P13056) Orphan nuclear receptor TR2 (Testicular receptor 2) [MASS=53042]                                                                                                                                                                        | 0.00 | 3.11 | 1.58 | 0.00 | 1 | 1 | 2      | HYGAVTC[339]EGC[339]KGFFK                                    | 1      |
| TRABD_HUMAN (Q9UGI0) Protein TRABID (Zinc finger Ran-binding domain-containing protein 1) [MASS=80907]                                                                                                                                                     | *    | 1.13 | *    | *    | * | 1 | 1      | SGSSDVGR                                                     | 1      |
| TRFL_HUMAN (P02788) Lactotransferrin precursor (EC 3.4.21.-) (Lactoferrin) (Talaktoferroin alfa) [Contains: Kaliocin-1; Lactoferroxin A; Lactoferroxin B; Lactoferroxin C] [MASS=78181]                                                                    | 0.00 | 4.23 | 0.70 | 0.00 | 1 | 1 | 3      | KC[330]NQWSGLSEGSVTC[330]SSASTTEDC[330]IALVLK                | 1      |
| TRI11_HUMAN (Q96F44) Tripartite motif-containing protein 11 (EC 6.3.2.-) (RING finger protein 92) (Protein BIA1) [MASS=52774]                                                                                                                              | *    | 3.63 | *    | *    | * | 1 | 2      | C[330]QLPALGLLQDIKDALR                                       | 1      |
| TRI29_HUMAN (Q14134) Tripartite motif-containing protein 29 (Ataxia-telangiectasia group D-associated protein) [MASS=65806]                                                                                                                                | *    | 5.78 | *    | *    | * | 1 | 3      | VWEYSSSIQNSDNDLPVVQGSSSFSLKGYPSLMR                           | 1      |
| TRI37_HUMAN (O94972) Tripartite motif-containing protein 37 (Mulibrey nanism protein) [MASS=107905]                                                                                                                                                        | 0.00 | 4.05 | 2.99 | 0.00 | 1 | 2 | 2<br>3 | KSAC[339]SDMLLEGGPTTASVR<br>SELISKSSEILMMFQQVHRK             | 1<br>1 |
| TRIM1_HUMAN (Q9UJV3) Midline-2 (Midline defect 2) (Tripartite motif-containing protein 1) (Midin-2) (RING finger protein 60) [MASS=81264]                                                                                                                  | 0.00 | 5.03 | 1.56 | 0.00 | 1 | 2 | 3<br>2 | TYRPTTAMSSERIAC[339]QFC[330]EQDPPR<br>IAC[330]QFC[330]EQDPPR | 1<br>1 |

|                                                                                                                                                                                                                                                                             |      |       |      |      |   |   |   |                                           |   |
|-----------------------------------------------------------------------------------------------------------------------------------------------------------------------------------------------------------------------------------------------------------------------------|------|-------|------|------|---|---|---|-------------------------------------------|---|
| TRIM9_HUMAN (Q9C026) Tripartite motif-containing protein 9 (RING finger protein 91) [MASS=79177]                                                                                                                                                                            | 0.00 | 2.96  | *    | *    | * | 1 | 3 | APKEATVMC[330]EQC[330]DVFYC[330]DPC[339]R | 1 |
|                                                                                                                                                                                                                                                                             |      |       |      |      |   |   | 2 | GRRDGEDLDSQGDGSSQPDTISIASR                | 1 |
|                                                                                                                                                                                                                                                                             |      |       |      |      |   |   | 2 | APIEDLDLEGQKLLQR                          | 1 |
|                                                                                                                                                                                                                                                                             |      |       |      |      |   |   | 2 | EPFPPSSPLQKGGFWSSIPASPASR                 | 1 |
|                                                                                                                                                                                                                                                                             |      |       |      |      |   |   | 3 | SKLFTSELGVTEHVEGDPC[330]K                 | 1 |
| TRIO_HUMAN (O75962) Triple functional domain protein (PTPRF-interacting protein) [MASS=341614]                                                                                                                                                                              | 0.00 | 5.00  | *    | *    | * | 9 | 2 | DFSLRMEK                                  | 1 |
|                                                                                                                                                                                                                                                                             |      |       |      |      |   |   | 1 | IVAQ GK                                   | 1 |
|                                                                                                                                                                                                                                                                             |      |       |      |      |   |   | 3 | LVNASVAFYKTSEQVC[330]SVLESLEQEYKR         | 1 |
|                                                                                                                                                                                                                                                                             |      |       |      |      |   |   | 2 | MKAM[147]DVLPIKKEK                        | 2 |
|                                                                                                                                                                                                                                                                             |      |       |      |      |   |   | 2 | EAEPIPKMK                                 | 1 |
| TRPM3_HUMAN (Q9HCF6) Transient receptor potential cation channel subfamily M member 3 (Long transient receptor potential channel 3) (LTrpC3) (Melastatin-2) (MLSN2) [MASS=197529]                                                                                           | *    | 1.10  | *    | *    | * | 1 | 2 | VENMSM[147]RLEEVNEREHSMK                  | 1 |
| TRPV1_HUMAN (Q8NER1) Transient receptor potential cation channel subfamily V member 1 (TrpV1) (osm-9-like TRP channel 1) (OTRPC1) (Vanilloid receptor 1) (Capsaicin receptor) [MASS=94938]                                                                                  | *    | 1.91  | *    | *    | * | 1 | 3 | HDM[147]LLVEPLNRLQDK                      | 1 |
| TRPV4_HUMAN (Q9HBA0) Transient receptor potential cation channel subfamily V member 4 (TrpV4) (osm-9-like TRP channel 4) (OTRPC4) (Vanilloid receptor-like channel 2) (Vanilloid receptor-like protein 2) (VRL-2) (Vanilloid receptor-related osmotically-acti [MASS=98281] | *    | 1.26  | *    | *    | * | 1 | 2 | MYDLLLKKC[339]AR                          | 1 |
| TRXR2_HUMAN (Q9NNW7) Thioredoxin reductase 2, mitochondrial precursor (EC 1.8.1.9) (TR3) (TR-beta) (Selenoprotein Z) (SelZ) [MASS=56459]                                                                                                                                    | *    | 4.96  | *    | *    | * | 1 | 3 | C[330]GASYAQVM[147]RTVGIHPTC[330]SEEVVKLR | 1 |
| TSKS_HUMAN (Q9UJT2) Testis-specific serine kinase substrate (Testis-specific kinase substrate) (STK22 substrate 1) [MASS=65050]                                                                                                                                             | 0.22 | 19.09 | 0.76 | 0.00 | 1 | 5 | 2 | EIHEAGDPTGVESC[330]SQLVPEAPR              | 1 |
|                                                                                                                                                                                                                                                                             |      |       |      |      |   |   | 2 | M[147]KPEEKM[147]ATLDHLHLK                | 1 |
|                                                                                                                                                                                                                                                                             |      |       |      |      |   |   | 3 | RGPDLSMNDR                                | 1 |
|                                                                                                                                                                                                                                                                             |      |       |      |      |   |   | 3 | MC[339]SLHDHLSNLPLEGSTGTMTGGSSAGTPPK      | 1 |
|                                                                                                                                                                                                                                                                             |      |       |      |      |   |   | 3 | TIWQSKEIHEAGDPTGVESC[330]SQLVPEAPRR       | 1 |



|                                                                                                                                                                                                |      |       |      |      |   |   |   |                                           |    |
|------------------------------------------------------------------------------------------------------------------------------------------------------------------------------------------------|------|-------|------|------|---|---|---|-------------------------------------------|----|
| TSSK6_HUMAN (Q9BXA6) Testis-specific serine/threonine-protein kinase 6 (EC 2.7.11.1) (TSSK-6) (Small serine/threonine kinase) (Serine/threonine-protein kinase SSTK) [MASS=30331]              | 0.00 | 20.15 | 0.64 | 0.00 | 1 | 2 | 3 | YLHDHHLVHRDLKC[339]ENVLLSPDER             | 1  |
|                                                                                                                                                                                                |      |       |      |      |   |   | 3 | KYDVWSMGVVLYVM[147]VTGC[330]MPFDDSDIAGLPR | 1  |
| TTC15_HUMAN (Q8WVT3) Tetratricopeptide repeat protein 15 (TPR repeat protein 15) [MASS=79361]                                                                                                  | *    | 3.95  | *    | *    | * | 1 | 3 | IM[147]VLM[147]NSAFLHLGQNNFAEAHRFFTEILR   | 1  |
| TTC7A_HUMAN (Q9ULT0) Tetratricopeptide repeat protein 7A (TPR repeat protein 7) [MASS=96184]                                                                                                   | *    | 8.51  | *    | *    | * | 3 | 3 | EAGFC[330]IQEAAGLFPTSHSVLYMR              | 1  |
|                                                                                                                                                                                                |      |       |      |      |   |   | 3 | LHYVEGSYRDAISMYARAGIDDMMSM[147]JENK       | 1  |
|                                                                                                                                                                                                |      |       |      |      |   |   | 2 | EALTVNPDGVRIMHSLGLM[147]LSR               | 1  |
| TXND4_HUMAN (Q9BS26) Thioredoxin domain-containing protein 4 precursor (Endoplasmic reticulum resident protein ERp44) [MASS=46971]                                                             | 0.97 | 2.96  | 1.55 | 0.00 | 1 | 1 | 2 | VDC[339]DQHSDIAQR                         | 1  |
| TXND5_HUMAN (Q8NBS9) Thioredoxin domain-containing protein 5 precursor (Thioredoxin-like protein p46) (Endoplasmic reticulum protein ERp46) [MASS=47629]                                       | 0.75 | 3.70  | 1.31 | 0.00 | 1 | 1 | 2 | VDC[339]TAHSDVC[339]SAQGVR                | 1  |
| UBE1_HUMAN (P22314) Ubiquitin-activating enzyme E1 (A1S9 protein) [MASS=117848]                                                                                                                | *    | 8.22  | *    | *    | * | 4 | 2 | LIAGKIIPAIATTTAAVVGLVC[339]LELYK          | 1  |
|                                                                                                                                                                                                |      |       |      |      |   |   | 2 | QLLHNFPDQLTSSGAPFWSGPKR                   | 1  |
|                                                                                                                                                                                                |      |       |      |      |   |   | 1 | SLVLQR                                    | 1  |
|                                                                                                                                                                                                |      |       |      |      |   |   | 3 | VGPDTERIYDDDFQNLGVDANALDNVDAR             | 1  |
| UBE4A_HUMAN (Q14139) Ubiquitin conjugation factor E4 A [MASS=122560]                                                                                                                           | 0.00 | 3.56  | 1.04 | 0.00 | 1 | 2 | 3 | IISMLNYFLQHLVGPKM[147]GALK                | 1  |
|                                                                                                                                                                                                |      |       |      |      |   |   | 2 | VFC[330]NFQYAPQLAEALIK                    | 1  |
|                                                                                                                                                                                                |      |       |      |      |   |   | 3 | NDSVIVDTFHGLFK                            | 12 |
| UBP11_HUMAN (P51784) Ubiquitin carboxyl-terminal hydrolase 11 (EC 3.1.2.15) (Ubiquitin thioesterase 11) (Ubiquitin-specific-processing protease 11) (Deubiquitinating enzyme 11) [MASS=105030] | *    | 4.02  | *    | *    | * | 2 |   |                                           |    |
|                                                                                                                                                                                                |      |       |      |      |   |   | 2 | TTSPEEVHAQPPIAIDWEPEMKK                   | 1  |

|                                                                                                                                                                                                                                |      |       |      |      |   |   |   |                                      |   |
|--------------------------------------------------------------------------------------------------------------------------------------------------------------------------------------------------------------------------------|------|-------|------|------|---|---|---|--------------------------------------|---|
| UBP18_HUMAN (Q9UMW8) Ubl carboxyl-terminal hydrolase 18 (EC 3.1.2.-) (Ubl thioesterase 18) (ISG15-specific-processing protease) (43 kDa ISG15-specific protease) (hUBP43) [MASS=43011]                                         | 0.00 | 5.38  | 2.14 | 0.00 | 1 | 1 | 3 | QIC[339]QSILAESSQSPADLEEK            | 1 |
| UBP37_HUMAN (Q86T82) Ubiquitin carboxyl-terminal hydrolase 37 (EC 3.1.2.15) (Ubiquitin thioesterase 37) (Ubiquitin-specific-processing protease 37) (Deubiquitinating enzyme 37) [MASS=110100]                                 | 0.00 | 5.52  | 0.81 | 0.00 | 1 | 3 | 2 | LRC[339]NQDYTGWNKPR                  | 1 |
|                                                                                                                                                                                                                                |      |       |      |      |   |   | 3 | DAEEMRFLDAVHQNRLPAAMK                | 4 |
| UBP38_HUMAN (Q8NB14) Ubiquitin carboxyl-terminal hydrolase 38 (EC 3.1.2.15) (Ubiquitin thioesterase 38) (Ubiquitin-specific-processing protease 38) (Deubiquitinating enzyme 38) (HP43.8KD) [MASS=116545]                      | *    | 3.84  | *    | *    | * | 2 | 2 | RITSFSSLSWSVDVDFDLDLSENLAKK          | 1 |
|                                                                                                                                                                                                                                |      |       |      |      |   |   | 2 | QVGHQVLEAYAR                         | 1 |
| UBP4_HUMAN (Q13107) Ubiquitin carboxyl-terminal hydrolase 4 (EC 3.1.2.15) (Ubiquitin thioesterase 4) (Ubiquitin-specific-processing protease 4) (Deubiquitinating enzyme 4) (Ubiquitous nuclear protein homolog) [MASS=108564] | 0.00 | 10.59 | 0.12 | 0.67 | 3 | 5 | 3 | SRPSSTSSASALYGQPLLLSVPKHK            | 1 |
|                                                                                                                                                                                                                                |      |       |      |      |   |   | 2 | VEVYLLELKLC[339]ENSDPTNVLSC[330]HFSK | 1 |
|                                                                                                                                                                                                                                |      |       |      |      |   |   | 3 | WYYFDDSNVSLASEDQIVTKAAYVLFYQR        | 1 |
|                                                                                                                                                                                                                                |      |       |      |      |   |   | 2 | HKLTLESLYQAVC[330]DR                 | 3 |
|                                                                                                                                                                                                                                |      |       |      |      |   |   | 1 | HQQATKK                              | 1 |
| UCHL1_HUMAN (P09936) Ubiquitin carboxyl-terminal hydrolase isozyme L1 (EC 3.4.19.12) (EC 6.-.-.-) (UCH-L1) (Ubiquitin thioesterase L1) (Neuron cytoplasmic protein 9.5) (PGP 9.5) (PGP9.5) [MASS=24824]                        | 1.00 | 17.94 | 0.84 | 0.08 | 3 | 2 | 3 | C[339]FEKNEAIQAAHDAVAQEGQC[339]R     | 1 |
|                                                                                                                                                                                                                                |      |       |      |      |   |   | 2 | NEAIQAAHDAVAQEGQC[330]R              | 1 |
|                                                                                                                                                                                                                                |      |       |      |      |   |   | 3 | NEAIQAAHDAVAQEGQC[330]R              | 1 |

|                                                                                                                                                                                                                                  |      |       |      |      |    |   |  |   |                                                   |   |
|----------------------------------------------------------------------------------------------------------------------------------------------------------------------------------------------------------------------------------|------|-------|------|------|----|---|--|---|---------------------------------------------------|---|
|                                                                                                                                                                                                                                  |      |       |      |      |    |   |  | 2 | EQC[330]EQLEK                                     | 1 |
|                                                                                                                                                                                                                                  |      |       |      |      |    |   |  | 2 | SHTEEDC[339]TEELFDLHAR                            | 1 |
|                                                                                                                                                                                                                                  |      |       |      |      |    |   |  | 2 | SHTEEDC[330]TEELFDLHAR                            | 1 |
|                                                                                                                                                                                                                                  |      |       |      |      |    |   |  | 1 | DHC[339]VAHK                                      | 1 |
|                                                                                                                                                                                                                                  |      |       |      |      |    |   |  | 2 | EQC[339]EQLEK                                     | 3 |
| UCRH_HUMAN (P07919) Ubiquinol-cytochrome c reductase complex 11 kDa protein, mitochondrial precursor (EC 1.10.2.2) (Mitochondrial hinge protein) (Cytochrome C1, nonheme 11 kDa protein) (Complex III subunit VIII) [MASS=10739] | 1.00 | 46.15 | 1.75 | 0.06 | 18 | 4 |  | 2 | ERLELC[330]DER                                    | 1 |
|                                                                                                                                                                                                                                  |      |       |      |      |    |   |  | 2 | ERLELC[339]DER                                    | 3 |
|                                                                                                                                                                                                                                  |      |       |      |      |    |   |  | 2 | DHC[330]VAHK                                      | 3 |
|                                                                                                                                                                                                                                  |      |       |      |      |    |   |  | 2 | DHC[339]VAHK                                      | 5 |
| UD12_HUMAN (P36509) UDP-glucuronosyltransferase 1-2 precursor (EC 2.4.1.17) (UDP-glucuronosyltransferase 1A2) (UDPGT) (UGT1*2) (UGT1-02) (UGT1.2) (UGT-1B) (UGT1B) (HLUGP4) [MASS=60018]                                         | *    | 6.42  | *    | *    | *  | 1 |  | 3 | KALPM[147]EFEAYINASGEHGIVVFLGSM[147]VSEIPEK       | 1 |
| UFO_HUMAN (P30530) Tyrosine-protein kinase receptor UFO precursor (EC 2.7.10.1) (AXL oncogene) [MASS=97436]                                                                                                                      | *    | 4.85  | *    | *    | *  | 2 |  | 3 | IAIC[339]TRSELEDFLSEAVC[339]M[147]KEFDHPNVM[147]R | 1 |
|                                                                                                                                                                                                                                  |      |       |      |      |    |   |  | 3 | ESFPAPVVILPFM[147]K                               | 2 |
| UGTAP_HUMAN (Q9HD40) UGA suppressor tRNA-associated protein (tRNA(Ser/Sec)-associated antigenic protein) (SLA/LP autoantigen) (Soluble liver antigen) (SLA) (Liver-pancreas antigen) (LP) (SLA-p35) [MASS=55726]                 | 0.00 | 10.38 | 0.85 | 0.00 | 1  | 2 |  | 2 | QVSGARVVPLGSMQTVSGYTFR                            | 1 |
|                                                                                                                                                                                                                                  |      |       |      |      |    |   |  | 3 | IDQKSC[330]FKSMITAGFEPVVIENVLEGDEL                | 1 |
| ULK1_HUMAN (O75385) Serine/threonine-protein kinase ULK1 (EC 2.7.11.1) (Unc-51-like kinase 1) [MASS=112601]                                                                                                                      | *    | 7.43  | *    | *    | *  | 4 |  | 3 | ASVWSC[330]QGLSLRLQRFFLDK                         | 1 |
|                                                                                                                                                                                                                                  |      |       |      |      |    |   |  | 3 | TPSSQNLLALLARQGVVMTPPRNR                          | 1 |
|                                                                                                                                                                                                                                  |      |       |      |      |    |   |  | 2 | PQNILLSNPAGRRANPNSIR                              | 1 |
|                                                                                                                                                                                                                                  |      |       |      |      |    |   |  | 3 | QLLLALLQRNHKDR                                    | 1 |
| ULK2_HUMAN (Q8IYT8) Serine/threonine-protein kinase ULK2 (EC 2.7.11.1) (Unc-51-like kinase 2) [MASS=112726]                                                                                                                      | 0.00 | 4.92  | 0.89 | 0.00 | 1  | 2 |  | 2 | KSC[339]PVPVPM[147]YSGSVSGSSC[339]GSSPSC[339]R    | 1 |
|                                                                                                                                                                                                                                  |      |       |      |      |    |   |  | 2 | PGSC[330]SPVPADTAQTVGRRLLSTGSSR                   | 1 |

|                                                                                                                                                                                                                                   |                      |       |      |      |    |   |   |                                       |   |
|-----------------------------------------------------------------------------------------------------------------------------------------------------------------------------------------------------------------------------------|----------------------|-------|------|------|----|---|---|---------------------------------------|---|
| UN13B_HUMAN (O14795) Unc-13 homolog B (Munc13-2) (munc13) [MASS=180683]                                                                                                                                                           | *                    | 7.54  | *    | *    | *  | 6 | 2 | VSAEVMWHLFAQDMKYALEEHEK               | 1 |
|                                                                                                                                                                                                                                   |                      |       |      |      |    |   | 3 | IDEC[330]VRQM[147]ADILGQVR            | 1 |
|                                                                                                                                                                                                                                   |                      |       |      |      |    |   | 2 | WQTAGM[147]FRPFVEVTM[147]VGPHQSDK     | 1 |
|                                                                                                                                                                                                                                   |                      |       |      |      |    |   | 2 | LDLGLSVEVWNKGLIWDTMVGTVWIALK          | 1 |
|                                                                                                                                                                                                                                   |                      |       |      |      |    |   | 2 | VSAEVMWHLFAQDM[147]K                  | 1 |
| 2                                                                                                                                                                                                                                 | VLGLAVM[147]PLRDVTAK | 1     |      |      |    |   |   |                                       |   |
| UNC5C_HUMAN (O95185) Netrin receptor UNC5C precursor (Unc-5 homolog C) (Unc-5 homolog 3) [MASS=103101]                                                                                                                            | 0.00                 | 2.79  | 0.23 | 0.00 | 1  | 1 | 3 | NQAAQGQWEDVVVVGEENFTTPC[330]YIK       | 1 |
|                                                                                                                                                                                                                                   |                      |       |      |      |    |   | 3 | NALVSHLDGTTTPVC[339]JEDIGR            | 2 |
|                                                                                                                                                                                                                                   |                      |       |      |      |    |   | 2 | NALVSHLDGTTTPVC[339]JEDIGR            | 4 |
| UQCR1_HUMAN (P31930) Ubiquinol-cytochrome-c reductase complex core protein I, mitochondrial precursor (EC 1.10.2.2) [MASS=52645]                                                                                                  | 1.00                 | 16.04 | 1.42 | 0.12 | 11 | 4 | 2 | LC[339]TSATESEVAR                     | 1 |
|                                                                                                                                                                                                                                   |                      |       |      |      |    |   | 2 | NALVSHLDGTTTPVC[330]JEDIGR            | 1 |
|                                                                                                                                                                                                                                   |                      |       |      |      |    |   | 3 | YIYDQC[339]PAVAGYGPIQLPDYNR           | 1 |
|                                                                                                                                                                                                                                   |                      |       |      |      |    |   | 3 | YIYDQC[330]PAVAGYGPIQLPDYNR           | 1 |
|                                                                                                                                                                                                                                   |                      |       |      |      |    |   | 2 | AVELLGDIVQNC[339]SLEDSQIEKER          | 1 |
| UQCR2_HUMAN (P22695) Ubiquinol-cytochrome-c reductase complex core protein 2, mitochondrial precursor (EC 1.10.2.2) (Complex III subunit II) [MASS=48443]                                                                         | 1.00                 | 12.80 | 1.85 | 0.03 | 5  | 4 | 2 | ENM[147]AYTVEC[339]LR                 | 1 |
|                                                                                                                                                                                                                                   |                      |       |      |      |    |   | 2 | LLTRAGSFSR                            | 1 |
|                                                                                                                                                                                                                                   |                      |       |      |      |    |   | 2 | KFVSGQKSMAASGNLGHPTFVDEL              | 1 |
|                                                                                                                                                                                                                                   |                      |       |      |      |    |   | 2 | NALANPLYC[330]PDYR                    | 1 |
|                                                                                                                                                                                                                                   |                      |       |      |      |    |   | 2 | NALANPLYC[339]PDYR                    | 3 |
| USH2A_HUMAN (O75445) Usherin precursor (Usher syndrome type-2A protein) (Usher syndrome type IIa protein) [MASS=575597]                                                                                                           | *                    | 1.92  | *    | *    | *  | 4 | 3 | M[147]QKISSTELHVEWSPPAELNGIIIRYELYMR  | 1 |
|                                                                                                                                                                                                                                   |                      |       |      |      |    |   | 3 | QVGKGLIHTDITDR                        | 1 |
|                                                                                                                                                                                                                                   |                      |       |      |      |    |   | 2 | TPLIQYDTSTGLGLVLTTPGKKK               | 1 |
|                                                                                                                                                                                                                                   |                      |       |      |      |    |   | 3 | GKVVGYDINMLSEQSPQQSIPM[147]AFSQLLHTAK | 1 |
| VA0D_HUMAN (P61421) Vacuolar ATP synthase subunit d (EC 3.6.3.14) (V-ATPase d subunit) (Vacuolar proton pump d subunit) (V-ATPase AC39 subunit) (V-ATPase 40 kDa accessory protein) (P39) (32 kDa accessory protein) [MASS=40329] | 0.67                 | 1.99  | 0.69 | 0.14 | 3  | 1 | 2 | LFPHC[330]GR                          | 3 |

|                                                                                                                                                                                                                        |      |       |      |      |    |   |   |                                          |   |
|------------------------------------------------------------------------------------------------------------------------------------------------------------------------------------------------------------------------|------|-------|------|------|----|---|---|------------------------------------------|---|
| VATA1_HUMAN (P38606) Vacuolar ATP synthase catalytic subunit A, ubiquitous isoform (EC 3.6.3.14) (V-ATPase subunit A 1) (Vacuolar proton pump alpha subunit 1) (V-ATPase 69 kDa subunit 1) (Isoform VA68) [MASS=68304] | 0.00 | 11.51 | 0.17 | 1.44 | 3  | 3 | 3 | FC[330]PFYKTVGMLSNMIAFYDMARR             | 3 |
|                                                                                                                                                                                                                        |      |       |      |      |    |   | 3 | ESTFGYVHGVSGPVVTAC[330]DMAGAAM[147]YELVR | 1 |
|                                                                                                                                                                                                                        |      |       |      |      |    |   | 3 | FC[330]PFYKTVGMLSNM[147]IAFYDM[147]ARR   | 1 |
|                                                                                                                                                                                                                        |      |       |      |      |    |   | 3 | AVETTAQSDNKITWSIIR                       | 1 |
|                                                                                                                                                                                                                        |      |       |      |      |    |   | 2 | IPIFSAAGLPHNEIAAQIC[339]R                | 1 |
|                                                                                                                                                                                                                        |      |       |      |      |    |   | 1 | SAIGEGMTR                                | 1 |
|                                                                                                                                                                                                                        |      |       |      |      |    |   | 3 | KDHGDVSNQLYAC[330]YAIGKDVQAM[147]K       | 1 |
| VATB1_HUMAN (P15313) Vacuolar ATP synthase subunit B, kidney isoform (EC 3.6.3.14) (V-ATPase B1 subunit) (Vacuolar proton pump B isoform 1) (Endomembrane proton pump 58 kDa subunit) [MASS=56980]                     | 0.00 | 10.33 | *    | *    | *  | 3 | 2 | IPIFSAAGLPHNEIAAQIC[330]R                | 4 |
| VATB2_HUMAN (P21281) Vacuolar ATP synthase subunit B, brain isoform (EC 3.6.3.14) (V-ATPase B2 subunit) (Vacuolar proton pump B isoform 2) (Endomembrane proton pump 58 kDa subunit) (HO57) [MASS=56500]               | 1.00 | 7.83  | 0.96 | 0.13 | 7  | 2 | 3 | GPVVLAEDFLDIM[147]GQPINPQC[339]R         | 1 |
|                                                                                                                                                                                                                        |      |       |      |      |    |   | 2 | KDHADVSNQLYAC[330]YAIGK                  | 1 |
|                                                                                                                                                                                                                        |      |       |      |      |    |   | 2 | YQIDPDAC[339]FSAK                        | 3 |
| VDAC1_HUMAN (P21796) Voltage-dependent anion-selective channel protein 1 (VDAC-1) (hVDAC1) (Outer mitochondrial membrane protein porin 1) (Plasmalemmal porin) (Porin 31HL) (Porin 31HM) [MASS=30641]                  | 1.00 | 10.99 | 2.12 | 0.03 | 11 | 2 | 2 | EHINLGC[330]DM[147]DFDIAGPSIR            | 1 |
|                                                                                                                                                                                                                        |      |       |      |      |    |   | 1 | YQIDPDAC[339]FSAK                        | 2 |
|                                                                                                                                                                                                                        |      |       |      |      |    |   | 2 | YQIDPDAC[330]FSAK                        | 2 |
|                                                                                                                                                                                                                        |      |       |      |      |    |   | 2 | EHINLGC[339]DM[147]DFDIAGPSIR            | 2 |
|                                                                                                                                                                                                                        |      |       |      |      |    |   | 3 | EHINLGC[339]DM[147]DFDIAGPSIR            | 1 |
| VDAC2_HUMAN (P45880) Voltage-dependent anion-selective channel protein 2 (VDAC-2) (hVDAC2) (Outer mitochondrial membrane protein porin 2) [MASS=38092]                                                                 | 0.99 | 11.82 | 1.41 | 0.00 | 2  | 2 | 2 | SC[339]SGVEFSTSGSSNTDTGK                 | 2 |
|                                                                                                                                                                                                                        |      |       |      |      |    |   | 2 | SINAGGHKVGSPWSWRLNPAER                   | 1 |
| VDAC3_HUMAN (Q9Y277) Voltage-dependent anion-selective channel protein 3 (VDAC-3) (hVDAC3) (Outer mitochondrial membrane protein porin 3) [MASS=30658]                                                                 | 0.99 | 3.89  | 1.51 | 0.00 | 1  | 1 | 2 | VC[339]NYGLTFTQK                         | 1 |

|                                                                                                                                                                                                                                                      |      |       |      |      |   |   |   |                                                                                              |        |
|------------------------------------------------------------------------------------------------------------------------------------------------------------------------------------------------------------------------------------------------------|------|-------|------|------|---|---|---|----------------------------------------------------------------------------------------------|--------|
| VILI_HUMAN (P09327) Villin-1 [MASS=92563]                                                                                                                                                                                                            | *    | 7.63  | *    | *    | * | 3 | 3 | M[147]VDDGSGEVQVWR<br>TEKQVVVEGQEPANFWMALGGKAPYANTK                                          | 1<br>3 |
| VINC_HUMAN (P18206) Vinculin (Metavinculin) [MASS=123667]                                                                                                                                                                                            | *    | 3.71  | *    | *    | * | 2 | 2 | LQEENLVITPRLFEC[330]SNKTGR                                                                   | 1      |
| VIPR2_HUMAN (P41587) Vasoactive intestinal polypeptide receptor 2 precursor (VIP-R-2) (Pituitary adenylate cyclase-activating polypeptide type III receptor) (PACAP type III receptor) (PACAP-R-3) (Helodermin-preferring VIP receptor) [MASS=49478] | 0.64 | 11.87 | 3.09 | 0.00 | 1 | 2 | 2 | AIYTLGYSVLSMLATGSIILC[339]LFRK<br>M[147]RTLPPALLTC[330]WLLAPVNSIHPEC[339]JR                  | 1<br>1 |
| VN1R4_HUMAN (Q7Z5H5) Vomeronasal type-1 receptor 4 (V1r-like receptor 4) (hGPCR27) [MASS=33557]                                                                                                                                                      | 0.00 | 7.31  | 0.52 | 0.00 | 1 | 1 | 2 | GVSIGTTC[330]LLSVFQVITVSSRK                                                                  | 1      |
| VPS16_HUMAN (Q9H269) Vacuolar protein sorting 16 (hVPS16) [MASS=94693]                                                                                                                                                                               | 0.00 | 2.15  | *    | *    | * | 1 | 2 | STHEFLHEVPAASEEIFK                                                                           | 1      |
| VWF_HUMAN (P04275) Von Willebrand factor precursor (vWF) [Contains: Von Willebrand antigen II] [MASS=309298]                                                                                                                                         | *    | 2.67  | *    | *    | * | 3 | 2 | M[147]IPARFAGVLLALALILPGTLC[339]AEGTR                                                        | 1      |
| WDR69_HUMAN (Q8N136) WD repeat protein 69 [MASS=45777]                                                                                                                                                                                               | 0.00 | 6.75  | 0.41 | 0.00 | 1 | 1 | 3 | TVMIDVC[330]TTC[330]RC[339]M[147]VQVGVISGFK<br>VNC[330]TTQPC[330]PTAKAPTC[330]GLC[330]EVARLR | 1<br>1 |
| WDR7_HUMAN (Q9Y4E6) WD repeat protein 7 (TGF-beta resistance-associated protein TRAG) (Rabconnectin-3 beta) [MASS=163809]                                                                                                                            | 0.00 | 6.75  | 0.41 | 0.00 | 1 | 1 | 2 | GHTAEIVC[330]LSFNPQSTLVATGSM[147]DTTAK                                                       | 1      |
| WDR7_HUMAN (Q9Y4E6) WD repeat protein 7 (TGF-beta resistance-associated protein TRAG) (Rabconnectin-3 beta) [MASS=163809]                                                                                                                            | *    | 4.03  | *    | *    | * | 2 | 3 | MPTDVVDLLVEVMDIIMYC[330]LEGLVKKK<br>QLANITM[147]GLPLSPAADSARSARHALSLIATAR                    | 1<br>1 |
| WNK3_HUMAN (Q9BYP7) Serine/threonine-protein kinase WNK3 (EC 2.7.11.1) (Protein kinase with no lysine 3) (Protein kinase, lysine-deficient 3) [MASS=191788]                                                                                          | 0.00 | 4.48  | 0.86 | 0.00 | 1 | 4 | 2 | SEHKDVVVDGKISEC[339]ASVETK                                                                   | 1      |
| WSB1_HUMAN (Q9Y6I7) WD repeat and SOCS box-containing protein 1 (WSB-1) (SOCS box-containing WD protein SWiP-1) [MASS=47432]                                                                                                                         | *    | 4.75  | *    | *    | * | 1 | 2 | GVPKQGDNFLSFSAAC[330]ETDVSSVTPEK<br>C[339]KAM[147]SGSFQRGR                                   | 1<br>1 |
| WDR7_HUMAN (Q9Y4E6) WD repeat protein 7 (TGF-beta resistance-associated protein TRAG) (Rabconnectin-3 beta) [MASS=163809]                                                                                                                            | 0.00 | 4.48  | 0.86 | 0.00 | 1 | 4 | 3 | GGQEVKYEQC[330]SKSTSEISK                                                                     | 1      |
| WSB1_HUMAN (Q9Y6I7) WD repeat and SOCS box-containing protein 1 (WSB-1) (SOCS box-containing WD protein SWiP-1) [MASS=47432]                                                                                                                         | *    | 4.75  | *    | *    | * | 1 | 2 | EIVRLRTIGELLAPAAPFDK                                                                         | 1      |
| XKRY_HUMAN (O14609) Testis-specific XK-related protein, Y-linked [MASS=18083]                                                                                                                                                                        | 0.00 | 18.24 | 0.51 | 0.00 | 1 | 1 | 3 | M[147]FIFNSIADDIFPLISC[330]VGAIHC[330]NILAIR                                                 | 1      |

|                                                                                                                                                                                                                                                                             |      |      |      |      |   |   |   |                                                  |   |
|-----------------------------------------------------------------------------------------------------------------------------------------------------------------------------------------------------------------------------------------------------------------------------|------|------|------|------|---|---|---|--------------------------------------------------|---|
| XPO1_HUMAN (O14980) Exportin-1 (Exp1) (Chromosome region maintenance 1 protein homolog) [MASS=123385]                                                                                                                                                                       | 0.00 | 5.98 | 0.66 | 0.28 | 2 | 3 | 2 | DNKAIIASNIMYIVGQYPRFLR                           | 1 |
|                                                                                                                                                                                                                                                                             |      |      |      |      |   |   | 2 | LDINLLDNNVNC[330]LYHGEGAQQR                      | 1 |
|                                                                                                                                                                                                                                                                             |      |      |      |      |   |   | 2 | RQM[147]SVPGIFNPHEIPEEMC[330]D                   | 1 |
| YLPM1_HUMAN (P49750) YLP motif-containing protein 1 (Nuclear protein ZAP3) (ZAP113) [MASS=219984]                                                                                                                                                                           | 0.00 | 0.97 | 0.87 | 0.00 | 1 | 1 | 2 | GFEVYLAEM[147]SADNQTTC[339]GKR                   | 1 |
| Z3H7A_HUMAN (Q8IWR0) Zinc finger CCCH-type domain-containing protein 7A [MASS=110537]                                                                                                                                                                                       | *    | 4.43 | *    | *    | * | 2 | 2 | SGPKLM[147]DFTYHANIDHKC[330]K                    | 1 |
|                                                                                                                                                                                                                                                                             |      |      |      |      |   |   | 3 | FPTGYFSIC[339]DRYMNGTC[339]PEGNSC[339]K          | 1 |
| Z585A_HUMAN (Q6P3V2) Zinc finger protein 585A [MASS=87988]                                                                                                                                                                                                                  | *    | 2.34 | *    | *    | * | 1 | 2 | HQTTHTGDKPYKC[339]GIC[339]GK                     | 1 |
| ZBTB2_HUMAN (Q8N680) Zinc finger and BTB domain-containing protein 2 [MASS=57336]                                                                                                                                                                                           | 0.00 | 2.33 | 0.08 | 0.00 | 1 | 1 | 2 | MLFVHQTSEC[330]VR                                | 1 |
| ZBTB9_HUMAN (Q96C00) Zinc finger and BTB domain-containing protein 9 [MASS=50602]                                                                                                                                                                                           | *    | 7.19 | *    | *    | * | 2 | 2 | LKHHLTEHM[147]KTHAGALHAC[330]PHC[339]GR          | 1 |
|                                                                                                                                                                                                                                                                             |      |      |      |      |   |   | 2 | PFGC[330]GIC[330]NKR                             | 1 |
| ZCHC8_HUMAN (Q6NZY4) Zinc finger CCHC domain-containing protein 8 [MASS=78577]                                                                                                                                                                                              | *    | 8.35 | *    | *    | * | 2 | 2 | EYMDAC[339]GEANNQNFQQRYHAEEVEER                  | 1 |
|                                                                                                                                                                                                                                                                             |      |      |      |      |   |   | 3 | LNILTRPSGILVNDTKLDGPILQILFMNNAISK                | 1 |
| ZDH13_HUMAN (Q8IUH4) Probable palmitoyltransferase ZDHHC13 (EC 2.3.1.-) (Zinc finger DHHC domain-containing protein 13) (DHHC-13) (Huntingtin-interacting protein 14-related protein) (HIP14-related protein) (Huntingtin-interacting protein HIP3RP) (Putativ [MASS=70888] | 0.00 | 3.70 | 0.83 | 0.00 | 1 | 1 | 3 | SLHC[330]HVC[330]NC[330]C[330]VARYDQHC[330]LWTGR | 1 |
| ZEP1_HUMAN (P15822) Zinc finger protein 40 (Human immunodeficiency virus type I enhancer-binding protein 1) (HIV-EP1) (Major histocompatibility complex-binding protein 1) (MBP-1) (Positive regulatory domain II-binding factor 1) (PRDII-BF1) [MASS=297217]               | *    | 4.20 | *    | *    | * | 6 | 2 | SLGSTDSGYFSRSESADQTVSPPTPFARR                    | 1 |
|                                                                                                                                                                                                                                                                             |      |      |      |      |   |   | 3 | SSPAPSENTHLSPLK                                  | 1 |
|                                                                                                                                                                                                                                                                             |      |      |      |      |   |   | 2 | QNGETPGIIAEASK                                   | 1 |
|                                                                                                                                                                                                                                                                             |      |      |      |      |   |   | 1 | KSPGVK                                           | 1 |
|                                                                                                                                                                                                                                                                             |      |      |      |      |   |   | 2 | IDFLNKAEFLMIPAGLNTLNVPGC[330]HR                  | 1 |
|                                                                                                                                                                                                                                                                             |      |      |      |      |   |   | 3 | AEFLMIPAGLNTLNVPGC[339]HREM[147]RR               | 1 |
| ZFAN1_HUMAN (Q8TCF1) AN1-type zinc finger protein 1 [MASS=30787]                                                                                                                                                                                                            | 0.00 | 5.97 | 0.59 | 0.00 | 1 | 1 | 2 | SRESHGC[330]PEVTVINER                            | 1 |
| ZFP1_HUMAN (Q6P2D0) Zinc finger protein 1 homolog (Zfp-1) [MASS=47516]                                                                                                                                                                                                      | *    | 5.16 | *    | *    | * | 1 | 3 | SYAGKQTDEC[330]NEFGKALLYLK                       | 1 |
| ZFP28_HUMAN (Q8NHY6) Zinc finger protein 28 homolog (Zfp-28) (Krueppel-like zinc finger factor X6) [MASS=98704]                                                                                                                                                             | 0.00 | 5.41 | 0.99 | 0.00 | 1 | 2 | 2 | AHLAQHQKTHHTGEKPYEC[330]K                        | 1 |
|                                                                                                                                                                                                                                                                             |      |      |      |      |   |   | 3 | AFGDNSSC[339]TQHQRQLHTGQRPYEC[339]IEC[339]GK     | 1 |

|                                                                                                                                                                                                                                                                             |      |       |      |      |   |   |   |                                        |   |
|-----------------------------------------------------------------------------------------------------------------------------------------------------------------------------------------------------------------------------------------------------------------------------|------|-------|------|------|---|---|---|----------------------------------------|---|
| ZFY28_HUMAN (Q9HCC9) Zinc finger FYVE domain-containing protein 28 [MASS=96500]                                                                                                                                                                                             | *    | 2.37  | *    | *    | * | 1 | 3 | SPREYYVQQEVIVLFC[339]ETVER             | 1 |
| ZFYV9_HUMAN (O95405) Zinc finger FYVE domain-containing protein 9 (Mothers against decapentaplegic homolog-interacting protein) (Madh-interacting protein) (Smad anchor for receptor activation) (Receptor activation anchor) (hSARA) (Novel serine protease) [MASS=156402] | 0.00 | 1.47  | 3.53 | 0.00 | 1 | 1 | 2 | GM[147]HAVGQSEIVILLQC[339]LPDEK        | 1 |
| ZIMP7_HUMAN (Q8NF64) PIAS-like protein Zimp7 [MASS=96536]                                                                                                                                                                                                                   | 0.00 | 3.04  | 2.09 | 0.00 | 1 | 1 | 3 | SPFLPDLKPNLNSLHSSPSGSGPC[339]DELR      | 1 |
| ZMYM1_HUMAN (Q5SVZ6) Zinc finger MYM-type protein 1 [MASS=128716]                                                                                                                                                                                                           | 0.00 | 3.42  | 0.50 | 0.00 | 1 | 2 | 3 | KGSAQLFC[330]SIPC[330]ITEYISSASSPVPSK  | 1 |
| ZN141_HUMAN (Q15928) Zinc finger protein 141 [MASS=55249]                                                                                                                                                                                                                   | *    | 2.74  | *    | *    | * | 1 | 3 | EPYNVKIHKIVAR                          | 1 |
| ZN142_HUMAN (P52746) Zinc finger protein 142 (HA4654) [MASS=187865]                                                                                                                                                                                                         | 0.00 | 3.02  | 1.48 | 0.00 | 1 | 3 | 2 | WKHYLR                                 | 1 |
|                                                                                                                                                                                                                                                                             |      |       |      |      |   |   | 2 | KHC[339]FDPVPPAGNSSPTEAPK              | 1 |
|                                                                                                                                                                                                                                                                             |      |       |      |      |   |   | 3 | RHPEPAQPAPGSPAETTEGLHC[339]SR          | 1 |
| ZN148_HUMAN (Q9UQR1) Zinc finger protein 148 (Zinc finger DNA-binding protein 89) (Transcription factor ZBP-89) [MASS=88976]                                                                                                                                                | 0.00 | 4.79  | 0.41 | 0.00 | 1 | 3 | 2 | C[330]GGIDEMQSSR                       | 1 |
|                                                                                                                                                                                                                                                                             |      |       |      |      |   |   | 2 | PYQC[339]EYC[339]LQYFSRTDR             | 1 |
|                                                                                                                                                                                                                                                                             |      |       |      |      |   |   | 3 | HKRMC[330]HENHDK                       | 1 |
| ZN177_HUMAN (Q13360) Zinc finger protein 177 [MASS=36369]                                                                                                                                                                                                                   | *    | 11.84 | *    | *    | * | 2 | 2 | EC[330]GKAFTVPSSLQK                    | 1 |
|                                                                                                                                                                                                                                                                             |      |       |      |      |   |   | 2 | NLASVGYQLC[330]RHSLISKVDQEQLK          | 1 |
| ZN236_HUMAN (Q9UL36) Zinc finger protein 236 [MASS=203659]                                                                                                                                                                                                                  | 0.00 | 2.01  | 0.53 | 0.00 | 1 | 2 | 2 | HM[147]KTHR                            | 1 |
|                                                                                                                                                                                                                                                                             |      |       |      |      |   |   | 3 | RHQTVPSAVSATGETEGGDIC[330]MEEEEHSDR    | 1 |
| ZN257_HUMAN (Q9Y2Q1) Zinc finger protein 257 (Bone marrow zinc finger 4) (BMZF-4) [MASS=62348]                                                                                                                                                                              | *    | 2.43  | *    | *    | * | 1 | 2 | C[339]EHENLQLRKGC[339]K                | 1 |
| ZN273_HUMAN (Q14593) Zinc finger protein 273 (Zinc finger protein HZF9) [MASS=58045]                                                                                                                                                                                        | *    | 7.34  | *    | *    | * | 2 | 2 | GYNGLNQC[330]LTTTQSKIFQC[339]DK        | 1 |
|                                                                                                                                                                                                                                                                             |      |       |      |      |   |   | 3 | C[339]EEC[339]GKAFNQSSLTR              | 1 |
| ZN407_HUMAN (Q9C0G0) Zinc finger protein 407 (Fragment) [MASS=126979]                                                                                                                                                                                                       | *    | 7.12  | *    | *    | * | 4 | 2 | HLC[330]PVTLDGERSAESPVLVTRITR          | 1 |
|                                                                                                                                                                                                                                                                             |      |       |      |      |   |   | 2 | VRKPEEM[147]M[147]SLTMSSNYGSPSR        | 1 |
|                                                                                                                                                                                                                                                                             |      |       |      |      |   |   | 3 | IRC[330]DDC[330]GFLADGLSGLNVHIAM[147]K | 1 |
|                                                                                                                                                                                                                                                                             |      |       |      |      |   |   | 2 | SFLC[330]DLC[339]GFAGGTR               | 1 |
| ZN420_HUMAN (Q8TAQ5) Zinc finger protein 420 [MASS=80246]                                                                                                                                                                                                                   | 0.00 | 1.74  | 1.23 | 0.00 | 1 | 1 | 3 | LENC[330]DLEESNSR                      | 1 |
| ZN430_HUMAN (Q9H8G1) Zinc finger protein 430 [MASS=66346]                                                                                                                                                                                                                   | 0.00 | 7.54  | 0.43 | 0.00 | 1 | 2 | 2 | NLVFLAGIAVSKPDLITC[330]LEQ GK          | 1 |
|                                                                                                                                                                                                                                                                             |      |       |      |      |   |   | 2 | EASGC[330]PGADRNLLVYSFYEK              | 1 |



|                                                                                                          |      |      |      |      |   |   |   |                                       |   |
|----------------------------------------------------------------------------------------------------------|------|------|------|------|---|---|---|---------------------------------------|---|
| ZN443_HUMAN (Q9Y2A4) Zinc finger protein 443 (Krueppel-type zinc finger protein ZK1) [MASS=77547]        | *    | 4.77 | *    | *    | * | 2 | 3 | HM[147]AVQRGDGPYKC[339]JK             | 1 |
|                                                                                                          |      |      |      |      |   |   | 2 | DVMQETIRNLDC[339]VVMKWK               | 1 |
| ZN446_HUMAN (Q9NWS9) Zinc finger protein 446 [MASS=48957]                                                | *    | 4.67 | *    | *    | * | 1 | 2 | RSLTGPRSYPC[330]EEEC[339]GC[330]SFSWK | 1 |
| ZN462_HUMAN (Q96JM2) Zinc finger protein 462 [MASS=161529]                                               | 0.00 | 1.06 | 1.19 | 0.00 | 1 | 1 | 2 | KPASC[339]VLVSPSNLER                  | 1 |
| ZN502_HUMAN (Q8TBZ5) Zinc finger protein 502 [MASS=62920]                                                | 0.00 | 1.84 | 0.55 | 0.00 | 1 | 1 | 2 | RETC[330]PGWVNK                       | 1 |
| ZN519_HUMAN (Q8TB69) Zinc finger protein 519 [MASS=63021]                                                | *    | 3.52 | *    | *    | * | 1 | 2 | C[330]EEEC[330]GKAFNRGSYLTQHQR        | 1 |
| ZN555_HUMAN (Q8NEP9) Zinc finger protein 555 [MASS=73062]                                                | *    | 6.69 | *    | *    | * | 3 | 3 | WPSSLPIHMLHTGEK                       | 1 |
|                                                                                                          |      |      |      |      |   |   | 3 | VFKWPSSLPIHM[147]R                    | 1 |
|                                                                                                          |      |      |      |      |   |   | 2 | AFSHPSSFRGHM[147]R                    | 1 |
|                                                                                                          |      |      |      |      |   |   | 3 | VFSC[339]GSTLETHK                     | 8 |
| ZN600_HUMAN (Q6ZNG1) Zinc finger protein 600 [MASS=83157]                                                | *    | 1.66 | *    | *    | * | 1 |   |                                       |   |
| ZN645_HUMAN (Q8N7E2) Zinc finger protein 645 [MASS=48784]                                                | 0.00 | 2.12 | 0.30 | 0.00 | 1 | 1 | 2 | RLSPC[330]PPTR                        | 1 |
| ZN680_HUMAN (Q8NEM1) Zinc finger protein 680 [MASS=61741]                                                | *    | 3.21 | *    | *    | * | 1 | 2 | EC[339]GKSFC[330]MLSHLTQHIR           | 1 |
|                                                                                                          |      |      |      |      |   |   | 1 | NLTSVGK                               | 3 |
| ZNF20_HUMAN (P17024) Zinc finger protein 20 (Zinc finger protein KOX13) [MASS=61567]                     | *    | 8.27 | *    | *    | * | 4 | 2 | EC[339]GNAFSFPSEIRRHK                 | 2 |
|                                                                                                          |      |      |      |      |   |   | 2 | VM[147]HSGDGPYKC[339]JK               | 1 |
|                                                                                                          |      |      |      |      |   |   | 2 | RNLMLREK                              | 1 |
| ZNF43_HUMAN (P17038) Zinc finger protein 43 (Zinc protein HTF6) (Zinc finger protein KOX27) [MASS=93487] | 0.00 | 3.74 | 0.76 | 0.00 | 1 | 1 | 3 | NVMLENYRNLVFLGIAVSKPDLITC[330]LEQEK   | 1 |
| ZNT3_HUMAN (Q99726) Zinc transporter 3 (ZnT-3) (Solute carrier family 30 member 3) [MASS=41944]          | 0.24 | 6.96 | 1.59 | 0.00 | 1 | 1 | 3 | AADPISTFLFSIC[330]ALGSTAPTLRDVLR      | 2 |
| ZSWM4_HUMAN (Q9H7M6) Zinc finger SWIM domain-containing protein 4 [MASS=110167]                          | *    | 1.21 | *    | *    | * | 1 | 3 | GLHLLQSGAVDR                          | 1 |

## Table 8. EAD Mitochondrial Study

### Experiment 2

| Description                                                                                                                                                                                                                                                                   | A = Protein Score |      |      |      | E = XPress Peptides |   |                  | Peptide Sequence                                                                                | H                |
|-------------------------------------------------------------------------------------------------------------------------------------------------------------------------------------------------------------------------------------------------------------------------------|-------------------|------|------|------|---------------------|---|------------------|-------------------------------------------------------------------------------------------------|------------------|
|                                                                                                                                                                                                                                                                               | A                 | B    | C    | D    | E                   | F | G                |                                                                                                 |                  |
| 1433E_HUMAN (P62258) 14-3-3 protein epsilon (14-3-3E) [MASS=29174]                                                                                                                                                                                                            | 0.00              | 9.41 | 0.64 | 0.00 | 1                   | 1 | 3                | LIC[330]C[330]DILDVLDKHLIPAANTGESK                                                              | 1                |
| 1433G_HUMAN (P61981) 14-3-3 protein gamma (Protein kinase C inhibitor protein 1) (KCIP-1) [MASS=28171]                                                                                                                                                                        | 1.00              | 7.72 | 1.04 | 0.00 | 2                   | 1 | 2<br>2           | ELEAVC[339]QDVLSLLDNYLIK<br>ELEAVC[330]QDVLSLLDNYLIK                                            | 1<br>1           |
| 1433Z_HUMAN (P63104) 14-3-3 protein zeta/delta (Protein kinase C inhibitor protein 1) (KCIP-1) [MASS=27745]                                                                                                                                                                   | *                 | 6.53 | *    | *    | *                   | 1 | 3                | LAEQAERYDDM[147]AAC[339]M[147]K                                                                 | 1                |
| 2A5E_HUMAN (Q16537) Serine/threonine-protein phosphatase 2A 56 kDa regulatory subunit epsilon isoform (PP2A, B subunit, B' epsilon isoform) (PP2A, B subunit, B56 epsilon isoform) (PP2A, B subunit, PR61 epsilon isoform) (PP2A, B subunit, R5 epsilon isoform) [MASS=54699] | 0.00              | 8.78 | 0.58 | 0.00 | 1                   | 2 | 3<br>3           | DPSLTEPVIRGLMKFWPK<br>LQQC[330]C[330]VIFDFM[147]DTLSDLKMKKEYK                                   | 1<br>1           |
| 3BP1_HUMAN (Q9Y3L3) SH3 domain-binding protein 1 (3BP-1) [MASS=75713]                                                                                                                                                                                                         | *                 | 2.14 | *    | *    | *                   | 1 | 3                | SPPETAAPVEDM[147]ARR                                                                            | 1                |
| 5HT7R_HUMAN (P34969) 5-hydroxytryptamine 7 receptor (5-HT-7) (Serotonin receptor 7) (5-HT-X) (5HT7) [MASS=53555]                                                                                                                                                              | 0.00              | 2.09 | 0.32 | 0.00 | 1                   | 1 | 2                | EVEEC[330]ANLSR                                                                                 | 1                |
| AATM_HUMAN (P00505) Aspartate aminotransferase, mitochondrial precursor (EC 2.6.1.1) (Transaminase A) (Glutamate oxaloacetate transaminase 2) [MASS=47475]                                                                                                                    | 1.00              | 9.53 | 1.69 | 0.04 | 5                   | 3 | 2<br>2<br>1<br>2 | NLDKEYLPIGGLAEFC[339]K<br>NLDKEYLPIGGLAEFC[330]K<br>VGAFTM[147]VC[330]K<br>TC[339]GFDFTGAVEDISK | 2<br>1<br>1<br>1 |
| ACL7A_HUMAN (Q9Y615) Actin-like protein 7A (Actin-like-7-alpha) (Actin-like 7A) [MASS=48644]                                                                                                                                                                                  | 0.00              | 5.06 | 4.72 | 0.00 | 1                   | 1 | 3                | RDLMGNILLC[339]GGSTMLSGFPNR                                                                     | 1                |

A = Protein Score  
B = Percent Coverage  
C = XPress H2L Ratio  
D = XPress Std. Dev.

E = XPress Peptides  
F = Unique Peptides  
G = Charge  
H = Instances

|                                                                                                                                                                                                                                                              |      |       |       |      |   |   |   |                                                                           |        |
|--------------------------------------------------------------------------------------------------------------------------------------------------------------------------------------------------------------------------------------------------------------|------|-------|-------|------|---|---|---|---------------------------------------------------------------------------|--------|
| ACON_HUMAN (Q99798) Aconitate hydratase, mitochondrial precursor (EC 4.2.1.3) (Citrate hydro-lyase) (Aconitase) [MASS=85425]                                                                                                                                 | *    | 2.05  | *     | *    | * | 1 | 3 | AITKSFARIHETNLK                                                           | 1      |
| ACOT1_HUMAN (Q86TX2) Acyl-coenzyme A thioesterase 1 (EC 3.1.2.2) (Acyl-CoA thioesterase 1) (Inducible cytosolic acyl-coenzyme A thioester hydrolase) (Long chain acyl-CoA thioester hydrolase) (Long chain acyl-CoA hydrolase) (CTE-I) (CTE-Ib) [MASS=46277] | *    | 4.28  | *     | *    | * | 1 | 2 | GLAPEQPVTLRASLRDEK                                                        | 1      |
| ACSL4_HUMAN (O60488) Long-chain-fatty-acid--CoA ligase 4 (EC 6.2.1.3) (Long-chain acyl-CoA synthetase 4) (LACS 4) [MASS=79188]                                                                                                                               | 0.00 | 3.23  | 18.25 | 0.00 | 1 | 1 | 3 | GDC[339]TVLKPTLM[147]AAVPEIMDRIYK                                         | 1      |
| ACTB_HUMAN (P60709) Actin, cytoplasmic 1 (Beta-actin) [MASS=41736]                                                                                                                                                                                           | 0.00 | 13.07 | 0.92  | 0.00 | 1 | 2 | 3 | C[339]PEALFQPSFLGMESC[339]GIHETTFNSIM[147]K<br>DLYANTVLSGGTTM[147]YPGIADR | 1<br>1 |
| ACTZ_HUMAN (P61163) Alpha-centractin (Centractin) (Centrosome-associated actin homolog) (Actin-RPV) (ARP1) [MASS=42613]                                                                                                                                      | *    | 1.33  | *     | *    | * | 1 | 1 | PKHVR                                                                     | 1      |
| ADA18_HUMAN (Q9Y3Q7) ADAM 18 precursor (A disintegrin and metalloproteinase domain 18) (Transmembrane metalloproteinase-like, disintegrin-like, and cysteine-rich protein III) (tMDC III) [MASS=82856]                                                       | 0.00 | 3.38  | 0.38  | 0.00 | 1 | 2 | 2 | VHLMGYNC[339]NATTKC[339]K<br>RNEISKSC[330]NR                              | 1<br>1 |
| ADA22_HUMAN (Q9P0K1) ADAM 22 precursor (A disintegrin and metalloproteinase domain 22) (Metalloproteinase-like, disintegrin-like, and cysteine-rich protein 2) (Metalloproteinase-disintegrin ADAM22-3) [MASS=100432]                                        | *    | 2.98  | *     | *    | * | 1 | 3 | FTQC[339]NIEEYHDFLNSGGGAC[339]LFNKPSK                                     | 1      |
| ADCY5_HUMAN (O95622) Adenylate cyclase type 5 (EC 4.6.1.1) (Adenylate cyclase type V) (ATP pyrophosphate-lyase 5) (Adenylyl cyclase 5) (Fragment) [MASS=100876]                                                                                              | *    | 0.89  | *     | *    | * | 1 | 2 | YSKQVDDR                                                                  | 1      |

|                                                                                                                                                                                                                                                                              |      |       |      |      |   |   |   |                                      |   |
|------------------------------------------------------------------------------------------------------------------------------------------------------------------------------------------------------------------------------------------------------------------------------|------|-------|------|------|---|---|---|--------------------------------------|---|
| ADCY6_HUMAN (O43306) Adenylate cyclase type 6 (EC 4.6.1.1) (Adenylate cyclase type VI) (ATP pyrophosphate-lyase 6) (Ca(2+)-inhibitable adenyl cyclase) [MASS=130615]                                                                                                         | *    | 2.83  | *    | *    | * | 2 | 3 | IGLNM[147]GPVVAGVIGAR                | 1 |
|                                                                                                                                                                                                                                                                              |      |       |      |      |   |   | 2 | LLNEIADFDEIISEER                     | 1 |
| ADCY8_HUMAN (P40145) Adenylate cyclase type 8 (EC 4.6.1.1) (Adenylate cyclase type VIII) (ATP pyrophosphate-lyase 8) (Ca(2+)/calmodulin-activated adenyl cyclase) [MASS=140121]                                                                                              | 0.00 | 1.92  | 1.56 | 0.00 | 1 | 1 | 3 | IKTIGSTYMAVSGLSPEKQQC[339]EDK        | 1 |
| ADIPO_HUMAN (Q15848) Adiponectin precursor (Adipocyte, C1q and collagen domain-containing protein) (30 kDa adipocyte complement-related protein) (Adipocyte complement-related 30 kDa protein) (ACRP30) (Adipose most abundant gene transcript 1) (apM-1) (Gel [MASS=26413]) | *    | 2.87  | *    | *    | * | 1 | 1 | DGTPGEK                              | 1 |
| ADO_HUMAN (Q06278) Aldehyde oxidase (EC 1.2.3.1) [MASS=147930]                                                                                                                                                                                                               | 0.00 | 4.78  | 1.13 | 0.00 | 1 | 4 | 1 | VGGAFGGK                             | 1 |
|                                                                                                                                                                                                                                                                              |      |       |      |      |   |   | 3 | LIGRHWNEQMLDIAC[339]R                | 1 |
|                                                                                                                                                                                                                                                                              |      |       |      |      |   |   | 3 | HWNEQMLDIAC[330]RLILNEVSLLSAPGGKVEFK | 1 |
|                                                                                                                                                                                                                                                                              |      |       |      |      |   |   | 1 | DLLEFKFK                             | 1 |
| ADRO_HUMAN (P22570) NADPH:adrenodoxin oxidoreductase, mitochondrial precursor (EC 1.18.1.2) (Adrenodoxin reductase) (AR) (Ferredoxin reductase) (Ferredoxin--NADP(+) reductase) [MASS=53836]                                                                                 | *    | 2.24  | *    | *    | * | 1 | 2 | HPQAHVDIYEK                          | 1 |
|                                                                                                                                                                                                                                                                              |      |       |      |      |   |   | 2 | EFHGLGDC[339]IIK                     | 3 |
| ADT1_HUMAN (P12235) ADP/ATP translocase 1 (Adenine nucleotide translocator 1) (ANT 1) (ADP,ATP carrier protein 1) (Solute carrier family 25 member 4) (ADP,ATP carrier protein, heart/skeletal muscle isoform T1) [MASS=32933]                                               | 1.00 | 12.79 | 1.83 | 0.03 | 9 | 2 | 2 | YFAGNLASGGAAGATSLC[339]FVYPLDFAR     | 2 |
|                                                                                                                                                                                                                                                                              |      |       |      |      |   |   | 2 | EFHGLGDC[330]IIK                     | 1 |
|                                                                                                                                                                                                                                                                              |      |       |      |      |   |   | 1 | EFHGLGDC[330]IIK                     | 1 |
|                                                                                                                                                                                                                                                                              |      |       |      |      |   |   | 3 | YFAGNLASGGAAGATSLC[339]FVYPLDFAR     | 1 |
|                                                                                                                                                                                                                                                                              |      |       |      |      |   |   | 3 | YFAGNLASGGAAGATSLC[330]FVYPLDFAR     | 1 |

|                                                                                                                                                                                                                                                                               |      |      |      |      |   |   |   |                                   |   |
|-------------------------------------------------------------------------------------------------------------------------------------------------------------------------------------------------------------------------------------------------------------------------------|------|------|------|------|---|---|---|-----------------------------------|---|
| ADT2_HUMAN (P05141) ADP/ATP translocase 2 (Adenine nucleotide translocator 2) (ANT 2) (ADP,ATP carrier protein 2) (Solute carrier family 25 member 5) (ADP,ATP carrier protein, fibroblast isoform) [MASS=32764]                                                              | 0.33 | 2.69 | 2.60 | 0.00 | 1 | 1 | 1 | GLGDC[330]LVK                     | 1 |
|                                                                                                                                                                                                                                                                               |      |      |      |      |   |   | 2 | GLGDC[339]LVK                     | 1 |
| AKA11_HUMAN (Q9UKA4) A-kinase anchor protein 11 (Protein kinase A-anchoring protein 11) (PRKA11) (A kinase anchor protein 220 kDa) (AKAP 220) (hAKAP220) [MASS=210511]                                                                                                        | *    | 0.37 | *    | *    | * | 1 | 1 | QRAFSLK                           | 1 |
| AKAP9_HUMAN (Q99996) A-kinase anchor protein 9 (Protein kinase A-anchoring protein 9) (PRKA9) (A-kinase anchor protein 450 kDa) (AKAP 450) (A-kinase anchor protein 350 kDa) (AKAP 350) (hgAKAP 350) (AKAP 120-like protein) (Protein hyperion) (Protein yotia) [MASS=453664] | 0.00 | 1.36 | 0.29 | 0.00 | 1 | 4 | 3 | EHYVAVQLLKEEC[330]GTLK            | 1 |
|                                                                                                                                                                                                                                                                               |      |      |      |      |   |   | 3 | QHMAQMEEMKTRHK                    | 1 |
|                                                                                                                                                                                                                                                                               |      |      |      |      |   |   | 2 | ARQTIAEQESK                       | 1 |
|                                                                                                                                                                                                                                                                               |      |      |      |      |   |   | 3 | ELLSRQKEAMK                       | 1 |
| AKT1_HUMAN (P31749) RAC-alpha serine/threonine-protein kinase (EC 2.7.11.1) (RAC-PK-alpha) (Protein kinase B) (PKB) (C-AKT) [MASS=55686]                                                                                                                                      | *    | 1.25 | *    | *    | * | 1 | 1 | DGATM[147]K                       | 1 |
| ALDH2_HUMAN (P05091) Aldehyde dehydrogenase, mitochondrial precursor (EC 1.2.1.3) (ALDH class 2) (ALDHI) (ALDH-E2) [MASS=56381]                                                                                                                                               | 0.89 | 2.13 | 1.81 | 0.00 | 1 | 1 | 2 | LLC[339]GGGIAADR                  | 1 |
| ALDOA_HUMAN (P04075) Fructose-bisphosphate aldolase A (EC 4.1.2.13) (Muscle-type aldolase) (Lung cancer antigen NY-LU-1) [MASS=39289]                                                                                                                                         | 0.32 | 7.71 | *    | *    | * | 1 | 3 | YASIC[330]QQNGIVPIVEPEILPDGDHDLKR | 1 |
| ALDOC_HUMAN (P09972) Fructose-bisphosphate aldolase C (EC 4.1.2.13) (Brain-type aldolase) [MASS=39324]                                                                                                                                                                        | 0.32 | 3.03 | 0.84 | 0.00 | 1 | 1 | 2 | AEVNGLAAQGK                       | 1 |
| ALMS1_HUMAN (Q8TCU4) Alstrom syndrome protein 1 [MASS=460933]                                                                                                                                                                                                                 | 0.00 | 1.82 | 1.69 | 0.00 | 1 | 4 | 2 | AELFGHGR                          | 1 |
|                                                                                                                                                                                                                                                                               |      |      |      |      |   |   | 3 | SDTTVESSHSGSNDIAIPDFPAQVLGTR      | 1 |
|                                                                                                                                                                                                                                                                               |      |      |      |      |   |   | 3 | SEPEGC[339]SGTIGNKIIIPM[147]MTVIK | 1 |
|                                                                                                                                                                                                                                                                               |      |      |      |      |   |   | 3 | QSQKLPVDFERSFQEEK                 | 1 |
| ALU8_HUMAN (P39195) Alu subfamily SX sequence contamination warning entry [MASS=64492]                                                                                                                                                                                        | 0.49 | 2.03 | 0.80 | 0.00 | 1 | 1 | 2 | AC[339]NPSYSGGXGR                 | 1 |

|                                                                                                                                                                                                                                                                              |      |      |      |      |   |   |             |                                                         |             |
|------------------------------------------------------------------------------------------------------------------------------------------------------------------------------------------------------------------------------------------------------------------------------|------|------|------|------|---|---|-------------|---------------------------------------------------------|-------------|
| AMOL1_HUMAN (Q8IY63) Angiotenin-like protein 1 [MASS=106573]                                                                                                                                                                                                                 | *    | 1.05 | *    | *    | * | 1 | 1           | HPAAKGTAEK                                              | 1           |
| ANAG_HUMAN (P54802) Alpha-N-acetylglucosaminidase precursor (EC 3.2.1.50) (N-acetyl-alpha-glucosaminidase) (NAG) [Contains: Alpha-N-acetylglucosaminidase 82 kDa form; Alpha-N-acetylglucosaminidase 77 kDa form] [MASS=82166]                                               | *    | 1.21 | *    | *    | * | 1 | 1           | VFPQVNVTK                                               | 1           |
| ANFY1_HUMAN (Q9P2R3) Ankyrin repeat and FYVE domain-containing protein 1 (Ankyrin repeats hooked to a zinc finger motif) [MASS=128398]                                                                                                                                       | *    | 1.03 | *    | *    | * | 2 | 1<br>1      | HLMLLR<br>EIPIIK                                        | 1<br>1      |
| ANK2_HUMAN (Q01484) Ankyrin-2 (Brain ankyrin) (Ankyrin-B) (Ankyrin, nonerythroid) [MASS=430341]                                                                                                                                                                              | *    | 0.64 | *    | *    | * | 3 | 2<br>1<br>2 | GRSKLPIR<br>TFGSSAHK<br>HQPVSTAGK                       | 1<br>1<br>1 |
| ANR11_HUMAN (Q6UB99) Ankyrin repeat domain-containing protein 11 (Ankyrin repeat-containing cofactor 1) [MASS=298068]                                                                                                                                                        | 0.00 | 1.61 | 0.96 | 0.00 | 1 | 3 | 2<br>1<br>3 | EDSAFDEY[C330]NK<br>NNTIAPK<br>GLDDDTPLHDAANNGHYKVKLLLR | 1<br>1<br>1 |
| AOFA_HUMAN (P21397) Amine oxidase [flavin-containing] A (EC 1.4.3.4) (Monoamine oxidase type A) (MAO-A) [MASS=59681]                                                                                                                                                         | 0.21 | 1.33 | 2.32 | 0.00 | 1 | 1 | 1           | IC[339]ELYAK                                            | 1           |
| AP1B1_HUMAN (Q10567) AP-1 complex subunit beta-1 (Adapter-related protein complex 1 beta-1 subunit) (Beta-adaptin 1) (Adaptor protein complex AP-1 beta-1 subunit) (Golgi adaptor HA1/AP1 adaptin beta subunit) (Clathrin assembly protein complex 1 beta larg [MASS=104606] | *    | 1.16 | *    | *    | * | 1 | 2           | MDRQM[147]FLATWK                                        | 1           |
| AP2A1_HUMAN (O95782) AP-2 complex subunit alpha-1 (Adapter-related protein complex 2 alpha-1 subunit) (Alpha-adaptin A) (Adaptor protein complex AP-2 alpha-1 subunit) (Clathrin assembly protein complex 2 alpha-A large chain) (100 kDa coated vesicle prote [MASS=107554] | *    | 1.23 | *    | *    | * | 1 | 2           | FKGDKALDGYSK                                            | 1           |

|                                                                                                                                                                                                                                                                              |      |       |      |      |   |   |        |                                                |        |
|------------------------------------------------------------------------------------------------------------------------------------------------------------------------------------------------------------------------------------------------------------------------------|------|-------|------|------|---|---|--------|------------------------------------------------|--------|
| AP2A2_HUMAN (O94973) AP-2 complex subunit alpha-2 (Adapter-related protein complex 2 alpha-2 subunit) (Alpha-adaptin C) (Adaptor protein complex AP-2 alpha-2 subunit) (Clathrin assembly protein complex 2 alpha-C large chain) (100 kDa coated vesicle prote [MASS=103960] | 0.63 | 1.81  | 0.70 | 0.00 | 1 | 1 | 2      | TVFEALQAPAC[330]HENLVK                         | 1      |
| AP2M1_HUMAN (Q96CW1) AP-2 complex subunit mu-1 (Adaptin mu-1) (AP-2 mu-2 chain) (Clathrin coat assembly protein AP50) (Clathrin coat-associated protein AP50) (Plasma membrane adaptor AP-2 50 kDa protein) (HA2 50 kDa subunit) (Clathrin assembly protein co [MASS=49654]  | *    | 3.91  | *    | *    | * | 1 | 2      | ESQISAEIELLPTNDKK                              | 1      |
| APMAP_HUMAN (Q9HDC9) Adipocyte plasma membrane-associated protein (BSCv protein) [MASS=46480]                                                                                                                                                                                | *    | 6.49  | *    | *    | * | 1 | 3      | LFENQLVGPESIAHIGDVMFTGTADGR                    | 1      |
| AQP9_HUMAN (O43315) Aquaporin-9 (AQP-9) (Small solute channel 1) [MASS=31401]                                                                                                                                                                                                | 0.00 | 12.20 | 4.00 | 0.00 | 1 | 1 | 3      | NLGAPRGGLEPIAIGLLIIVIASLGLNSGC[339]AM[147]NPAR | 1      |
| ARF6_HUMAN (P62330) ADP-ribosylation factor 6 [MASS=19951]                                                                                                                                                                                                                   | 0.00 | 11.49 | *    | *    | * | 1 | 3      | QDLPDAMKPHEIQEKLGLTR                           | 1      |
| ARI1B_HUMAN (Q8NFD5) AT-rich interactive domain-containing protein 1B (ARID domain-containing protein 1B) (Osa homolog 2) (hOsa2) (p250R) (BRG1-binding protein hELD/OSA1) (BRG1-associated factor 250b) (BAF250B) [MASS=236122]                                             | *    | 0.45  | *    | *    | * | 1 | 2      | VYELGNEPER                                     | 1      |
| ARID2_HUMAN (Q68CP9) AT-rich interactive domain-containing protein 2 (ARID domain-containing protein 2) (BRG1-associated factor 200) (BAF200) [MASS=197390]                                                                                                                  | 0.22 | 1.31  | 0.69 | 0.00 | 1 | 2 | 2<br>2 | RGSRNLVFR<br>FLKMRGMEILGNLC[330]K              | 1<br>1 |
| ARMX2_HUMAN (Q7L311) Armadillo repeat-containing X-linked protein 2 (Protein ALEX2) (ARM protein lost in epithelial cancers on chromosome X 2) [MASS=65683]                                                                                                                  | *    | 2.69  | *    | *    | * | 1 | 3      | PPFYEIDEILGVRDLRK                              | 1      |

|                                                                                                                                                                                                                                                                              |      |      |      |      |   |   |                                                                                                                   |                                   |   |
|------------------------------------------------------------------------------------------------------------------------------------------------------------------------------------------------------------------------------------------------------------------------------|------|------|------|------|---|---|-------------------------------------------------------------------------------------------------------------------|-----------------------------------|---|
| ARMX3_HUMAN (Q9UH62) Armadillo repeat-containing X-linked protein 3 (Protein ALEX3) (ARM protein lost in epithelial cancers on chromosome X 3) [MASS=42500]                                                                                                                  | 0.00 | 4.49 | 1.77 | 0.00 | 1 | 1 | 3                                                                                                                 | RLKVYMNQVC[339]DDTISR             | 1 |
| ASB10_HUMAN (Q8WXI3) Ankyrin repeat and SOCS box protein 10 (ASB-10) [MASS=46609]                                                                                                                                                                                            | 0.00 | 5.36 | *    | *    | * | 1 | 3                                                                                                                 | RGAC[330]PDARNAEGWTPLLAAC[339]DVR | 1 |
| AT131_HUMAN (Q9HD20) Probable cation-transporting ATPase 13A1 (EC 3.6.3.-) [MASS=132954]                                                                                                                                                                                     | 0.00 | 3.90 | 0.42 | 0.00 | 1 | 3 | 1 DPSRNR<br>2 LIPHVQVFARVAPK<br>3 C[330]IVDEAMLTGESVPQM[147]KEPIEDLSPDR                                           | 1<br>1<br>1                       |   |
| AT1A3_HUMAN (P13637) Sodium/potassium-transporting ATPase alpha-3 chain (EC 3.6.3.9) (Sodium pump 3) (Na+/K+ ATPase 3) (Alpha(III)) [MASS=111734]                                                                                                                            | 1.00 | 4.74 | 0.59 | 0.14 | 6 | 4 | 2 VLGFC[339]HYLPEEQFPK<br>2 VLGFC[330]HYLPEEQFPK<br>1 C[330]IELSSGSVK<br>2 C[330]STILLQGK<br>2 SPDC[330]THDNPLETR | 1<br>1<br>1<br>1<br>2             |   |
| AT1B1_HUMAN (P05026) Sodium/potassium-transporting ATPase subunit beta-1 (Sodium/potassium-dependent ATPase beta-1 subunit) [MASS=35061]                                                                                                                                     | 0.45 | 4.29 | 0.54 | 0.00 | 1 | 1 | 2 YNPNVLPVQC[330]TGK                                                                                              | 1                                 |   |
| AT2A2_HUMAN (P16615) Sarcoplasmic/endoplasmic reticulum calcium ATPase 2 (EC 3.6.3.8) (Calcium pump 2) (SERCA2) (SR Ca(2+)-ATPase 2) (Calcium-transporting ATPase sarcoplasmic reticulum type, slow twitch skeletal muscle isoform) (Endoplasmic reticulum cla [MASS=114756] | *    | 1.34 | *    | *    | * | 1 | 2 KSM[147]SVYC[339]TPNKPSR                                                                                        | 1                                 |   |
| AT2A3_HUMAN (Q93084) Sarcoplasmic/endoplasmic reticulum calcium ATPase 3 (EC 3.6.3.8) (Calcium pump 3) (SERCA3) (SR Ca(2+)-ATPase 3) [MASS=113977]                                                                                                                           | 0.00 | 4.22 | 0.88 | 0.00 | 1 | 3 | 2 C[330]LALATRDAPPRK<br>1 VEPAHK<br>3 M[147]NVFDTDLQALSRVERAGAC[330]NTVIK                                         | 1<br>1<br>1                       |   |
| AT2B1_HUMAN (P20020) Plasma membrane calcium-transporting ATPase 1 (EC 3.6.3.8) (PMCA1) (Plasma membrane calcium pump isoform 1) (Plasma membrane calcium ATPase isoform 1) [MASS=138754]                                                                                    | 0.42 | 1.11 | 0.77 | 0.00 | 1 | 1 | 2 TEC[330]ALLGLLLDLKR                                                                                             | 1                                 |   |



|                                                                                                                                                                                                                                                                              |      |       |      |      |   |   |   |                                        |        |
|------------------------------------------------------------------------------------------------------------------------------------------------------------------------------------------------------------------------------------------------------------------------------|------|-------|------|------|---|---|---|----------------------------------------|--------|
| AT2C1_HUMAN (P98194) Calcium-transporting ATPase type 2C member 1 (EC 3.6.3.8) (ATPase 2C1) (ATP-dependent Ca(2+) pump PMR1) [MASS=100577]                                                                                                                                   | *    | 1.52  | *    | *    | * | 1 | 2 | MMQAEAEAPKTPLQK                        | 1      |
| AT5F1_HUMAN (P24539) ATP synthase B chain, mitochondrial precursor (EC 3.6.3.14) [MASS=28908]                                                                                                                                                                                | *    | 2.34  | *    | *    | * | 1 | 1 | C[339]IADLK                            | 1      |
| ATF6B_HUMAN (Q99941) Cyclic AMP-dependent transcription factor ATF-6 beta (Activating transcription factor 6 beta) (ATF6-beta) (cAMP-responsive element-binding protein-like 1) (cAMP response element-binding protein-related protein) (Creb-rp) (Protein G13) [MASS=76709] | *    | 1.00  | *    | *    | * | 1 | 1 | RENAALR                                | 1      |
| ATP5E_HUMAN (P56381) ATP synthase epsilon chain, mitochondrial (EC 3.6.3.14) [MASS=5649]                                                                                                                                                                                     | *    | 14.00 | *    | *    | * | 1 | 1 | YSQIC[339]AK                           | 1      |
| ATPG_HUMAN (P36542) ATP synthase gamma chain, mitochondrial precursor (EC 3.6.3.14) [MASS=32996]                                                                                                                                                                             | 1.00 | 4.03  | 2.09 | 0.00 | 2 | 1 | 2 | GLC[339]GAIHSSIAK<br>GLC[330]GAIHSSIAK | 1<br>1 |
| ATRIP_HUMAN (Q8WXE1) ATR-interacting protein (ATM and Rad3-related-interacting protein) [MASS=85837]                                                                                                                                                                         | *    | 1.52  | *    | *    | * | 1 | 3 | LAENTSC[330]DFLPR                      | 1      |
| ATS16_HUMAN (Q8TE57) ADAMTS-16 precursor (EC 3.4.24.-) (A disintegrin and metalloproteinase with thrombospondin motifs 16) (ADAM-TS 16) (ADAM-TS16) [MASS=136187]                                                                                                            | 0.00 | 0.90  | 6.65 | 0.00 | 1 | 1 | 3 | TRPVTGLVPC[339]K                       | 1      |
| B3A4_HUMAN (Q96Q91) Anion exchange protein 4 (Anion exchanger 4) (Solute carrier family 4 member 9) (Sodium bicarbonate cotransporter 5) [MASS=108247]                                                                                                                       | 0.00 | 1.42  | 1.46 | 0.00 | 1 | 1 | 2 | AC[330]APGERPNFLGIR                    | 1      |
| B4GT7_HUMAN (Q9UBV7) Beta-1,4-galactosyltransferase 7 (EC 2.4.1.-) (Beta-1,4-GalTase 7) (Beta4Gal-T7) (b4Gal-T7) (UDP-galactose:beta-N-acetylglucosamine beta-1,4-galactosyltransferase 7) (UDP-Gal:beta-GlcNAc beta-1,4-galactosyltransferase 7) [Includes: X [MASS=37406]  | 0.00 | 4.28  | 0.80 | 0.00 | 1 | 1 | 2 | LC[330]NGM[147]SNRFGWGR                | 1      |

|                                                                                                                                                                                                                    |      |      |       |      |   |   |   |                                                          |             |
|--------------------------------------------------------------------------------------------------------------------------------------------------------------------------------------------------------------------|------|------|-------|------|---|---|---|----------------------------------------------------------|-------------|
| BPA1_HUMAN (Q03001) Bullous pemphigoid antigen 1 isoforms 1/2/3/4/5/8 (230 kDa bullous pemphigoid antigen) (BPA) (Hemidesmosomal plaque protein) (Dystonia musculorum protein) (Dystonin) (Fragment) [MASS=372207] | *    | 0.31 | *     | *    | * | 1 | 3 | DYELQTM TYR                                              | 1           |
| BPAEB_HUMAN (Q8W XK8) Bullous pemphigoid antigen 1, isoform 7 (Bullous pemphigoid antigen) (BPA) (Hemidesmosomal plaque protein) (Dystonia musculorum protein) (Dystonin) (Fragment) [MASS=344987]                 | 0.00 | 0.78 | 0.45  | 0.00 | 1 | 1 | 3 | Q NMC[330]KDLIDPC[330]TSEK VSLIDMVQR                     | 1           |
| BPIL1_HUMAN (Q8N4F0) Bactericidal/permeability-increasing protein-like 1 precursor (Long palate, lung and nasal epithelium carcinoma-associated protein 2) (RYSR) [MASS=49172]                                     | 0.45 | 4.37 | *     | *    | * | 1 | 3 | LIPEVARQFPEPM[147]PVVLKVR                                | 1           |
| BRAP_HUMAN (Q7Z569) BRCA1-associated protein (EC 6.3.2.-) (BRAP2) (Impedes mitogenic signal propagation) (IMP) (RING finger protein 52) (NY-REN-63 antigen) [MASS=67290]                                           | 0.00 | 2.36 | 11.95 | 0.00 | 1 | 1 | 3 | C[339]LRANQVLLQNKLK                                      | 1           |
| BRCA1_HUMAN (P38398) Breast cancer type 1 susceptibility protein (RING finger protein 53) [MASS=207720]                                                                                                            | *    | 1.07 | *     | *    | * | 2 | 3 | GLIHGC[339]SKDNR<br>YFLGIAGGK                            | 1<br>1      |
| BRSK1_HUMAN (Q8TDC3) BR serine/threonine-protein kinase 1 (EC 2.7.11.1) (SAD1 kinase) (SAD1A) [MASS=86753]                                                                                                         | *    | 1.01 | *     | *    | * | 1 | 1 | NDVDP PRK                                                | 1           |
| BRWD1_HUMAN (Q9NSI6) Bromodomain and WD repeat domain-containing protein 1 (WD repeat protein 9) [MASS=262918]                                                                                                     | 0.23 | 2.24 | *     | *    | * | 2 | 3 | IMLSAGHDGSIFIWDITKGTK<br>TAYLGTHKTSAGISSGVTSGDSSDSAESSER | 1<br>1      |
| BRWD2_HUMAN (Q9BZH6) Bromodomain and WD repeat domain-containing protein 2 (WD repeat protein 11) [MASS=136684]                                                                                                    | *    | 0.57 | *     | *    | * | 1 | 1 | HKADVVK                                                  | 1           |
| BSN_HUMAN (Q9UPA5) Bassoon protein (Zinc-finger protein 231) [MASS=416365]                                                                                                                                         | *    | 0.97 | *     | *    | * | 3 | 3 | GYM[147]TPASPAGSER<br>PPSAPAGGGQLPAAGAAR<br>ATPAELR      | 2<br>1<br>1 |
| BUB3_HUMAN (O43684) Mitotic checkpoint protein BUB3 [MASS=37155]                                                                                                                                                   | 0.00 | 5.79 | *     | *    | * | 1 | 3 | FSPNTSQFLLVSSWDTSVR                                      | 1           |

|                                                                                                                                                                                                                                                                              |      |      |      |      |   |   |   |                        |   |
|------------------------------------------------------------------------------------------------------------------------------------------------------------------------------------------------------------------------------------------------------------------------------|------|------|------|------|---|---|---|------------------------|---|
| C163A_HUMAN (Q86VB7) Scavenger receptor cysteine-rich type 1 protein M130 precursor (CD163 antigen) (Hemoglobin scavenger receptor) [Contains: Soluble CD163 (sCD163)] [MASS=125436]                                                                                         | *    | 1.56 | *    | *    | * | 1 | 2 | LRGGGSR[330]AGTVEVEIQR | 1 |
| C560_HUMAN (Q99643) Succinate dehydrogenase cytochrome b560 subunit, mitochondrial precursor (Integral membrane protein CII-3) (QPs1) (QPs-1) (Succinate dehydrogenase complex subunit C) (Succinate-ubiquinone oxidoreductase cytochrome B large subunit) (CY [MASS=18610]) | 0.75 | 7.69 | 1.45 | 0.00 | 1 | 1 | 2 | SLC[339]LGPALIHTAK     | 1 |
|                                                                                                                                                                                                                                                                              |      |      |      |      |   |   | 3 | C[330]PSSLSNSRTHK      | 7 |
| C8AP2_HUMAN (Q9UKL3) CASP8-associated protein 2 (FLICE-associated huge protein) [MASS=222656]                                                                                                                                                                                | 0.00 | 0.96 | 0.07 | 4.29 | 2 | 2 |   |                        |   |
|                                                                                                                                                                                                                                                                              |      |      |      |      |   |   | 1 | TESKSSK                | 4 |
| CAC2D_HUMAN (P54289) Dihydropyridine-sensitive L-type calcium channel subunits alpha-2/delta precursor [Contains: L-type calcium channel subunit alpha-2; L-type calcium channel subunit delta] [MASS=123183]                                                                | *    | 0.92 | *    | *    | * | 1 | 1 | LLKPAVVGIK             | 1 |
| CAD23_HUMAN (Q9H251) Cadherin-23 precursor (Otocadherin) [MASS=369522]                                                                                                                                                                                                       | *    | 0.18 | *    | *    | * | 1 | 1 | STPLHK                 | 1 |
| CALD1_HUMAN (Q05682) Caldesmon (CDM) [MASS=93249]                                                                                                                                                                                                                            | 0.00 | 1.77 | *    | *    | * | 1 | 3 | PAASDLPVPAEGVR         | 1 |
| CAN3_HUMAN (P20807) Calpain-3 (EC 3.4.22.-) (Calpain L3) (Calpain p94) (Calcium-activated neutral proteinase 3) (CANP 3) (Muscle-specific calcium-activated neutral protease 3) (nCL-1) [MASS=94253]                                                                         | *    | 1.34 | *    | *    | * | 1 | 2 | DAPSDMYKIMK            | 1 |

|                                                                                                                                                                                                                           |      |      |      |      |   |   |        |                                 |        |
|---------------------------------------------------------------------------------------------------------------------------------------------------------------------------------------------------------------------------|------|------|------|------|---|---|--------|---------------------------------|--------|
| CASR_HUMAN (P41180) Extracellular calcium-sensing receptor precursor (CaSR) (Parathyroid Cell calcium-sensing receptor) [MASS=120673]                                                                                     | 0.00 | 2.32 | 1.19 | 0.00 | 1 | 1 | 3      | KSVHNGFAKEFWEEETFNC[339]HLQEGAK | 1      |
| CC038_HUMAN (Q5JPI3) Uncharacterized protein C3orf38 [MASS=37541]                                                                                                                                                         | *    | 4.56 | *    | *    | * | 1 | 3      | TEDIHLFQQQVKEDK                 | 1      |
| CCAR1_HUMAN (Q8IX12) Cell division cycle and apoptosis regulator protein 1 (Cell cycle and apoptosis regulatory protein 1) (CARP-1) (Death inducer with SAP domain) [MASS=132820]                                         | 0.00 | 2.00 | *    | *    | * | 1 | 3      | TDEDEKILNLENSNKSLSGELR          | 2      |
| CCND1_HUMAN (P24385) G1/S-specific cyclin-D1 (PRAD1 oncogene) (BCL-1 oncogene) [MASS=33729]                                                                                                                               | 0.00 | 4.75 | 1.11 | 0.00 | 1 | 1 | 2      | HAQTFVALC[339]ATDVK             | 1      |
| CCNL2_HUMAN (Q96S94) Cyclin-L2 (Paneth cell-enhanced expression protein) [MASS=58147]                                                                                                                                     | 0.00 | 2.88 | 0.77 | 0.00 | 1 | 1 | 2      | VVGC[330]ELIQAAGILLR            | 1      |
| CD2L5_HUMAN (Q14004) Cell division cycle 2-like protein kinase 5 (EC 2.7.11.22) (CDC2-related protein kinase 5) (Cholinesterase-related cell division controller) [MASS=164922]                                           | *    | 1.19 | *    | *    | * | 2 | 3<br>1 | QMGM[147]TDDVSTIK<br>RRAGGR     | 1<br>1 |
| CD38_HUMAN (P28907) ADP-ribosyl cyclase 1 (EC 3.2.2.5) (Cyclic ADP-ribose hydrolase 1) (cADPr hydrolase 1) (Lymphocyte differentiation antigen CD38) (T10) (Acute lymphoblastic leukemia cells antigen CD38) [MASS=34328] | 0.00 | 5.00 | 3.71 | 0.00 | 1 | 1 | 3      | HPC[339]NITEEDYQPLMK            | 1      |
| CD81_HUMAN (P60033) CD81 antigen (26 kDa cell surface protein TAPA-1) (Target of the antiproliferative antibody 1) (Tetraspanin-28) (Tspan-28) [MASS=25809]                                                               | 0.76 | 6.78 | 0.55 | 0.00 | 1 | 1 | 2      | NNLC[330]PSGSNIISNLFK           | 1      |
| CD9_HUMAN (P21926) CD9 antigen (p24) (Leukocyte antigen MIC3) (Motility-related protein) (MRP-1) (Tetraspanin-29) (Tspan-29) [MASS=25285]                                                                                 | *    | 3.08 | *    | *    | * | 1 | 1      | SC[330]PDAIK                    | 1      |
| CDAN1_HUMAN (Q8IWY9) Codanin-1 [MASS=133996]                                                                                                                                                                              | *    | 1.88 | *    | *    | * | 1 | 3      | WIARSTQGSEVTAGEAAVSSLR          | 1      |

|                                                                                                                                                                                         |      |      |      |      |   |   |   |                                 |                             |   |
|-----------------------------------------------------------------------------------------------------------------------------------------------------------------------------------------|------|------|------|------|---|---|---|---------------------------------|-----------------------------|---|
| CDC42_HUMAN (P60953) Cell division control protein 42 homolog precursor (G25K GTP-binding protein) [MASS=21310]                                                                         | 0.83 | 5.76 | 0.81 | 0.00 | 1 | 1 | 2 | C[339]VVVGDGAVGK                | 1                           |   |
| CE152_HUMAN (O94986) Centrosomal protein of 152 kDa (Cep152 protein) [MASS=147344]                                                                                                      | 0.00 | 1.65 | 2.27 | 0.00 | 1 | 1 | 3 | EMAIM[147]IEEQKC[339]TIQQNLEQEK | 1                           |   |
| CEA20_HUMAN (Q6UY09) Carcinoembryonic antigen-related cell adhesion molecule 20 precursor [MASS=64502]                                                                                  | 0.00 | 3.59 | *    | *    | * | 1 | 3 | ARSEPLELTINYGPDQVHITR           | 1                           |   |
| CENB2_HUMAN (Q15057) Centaurin-beta 2 (Cnt-b2) [MASS=88028]                                                                                                                             | 0.00 | 2.57 | 0.66 | 0.00 | 1 | 1 | 3 | LM[147]C[330]ELGNDVINRVYEANVEK  | 1                           |   |
| CEND1_HUMAN (Q8WZ64) Centaurin-delta 1 (Cnt-d1) (Arf-GAP, Rho-GAP, ankyrin repeat and pleckstrin homology domain-containing protein 2) (PARX protein) [MASS=193422]                     | 0.00 | 0.76 | *    | *    | * | 1 | 3 | IKEEPSKILSGNK                   | 5                           |   |
| CENPE_HUMAN (Q02224) Centromeric protein E (CENP-E protein) [MASS=312088]                                                                                                               | *    | 0.49 | *    | *    | * | 1 | 2 | DQFIATLREM[147]IAR              | 1                           |   |
| CENPF_HUMAN (P49454) CENP-F kinetochore protein (Centromere protein F) (Mitosin) (AH antigen) [MASS=367592]                                                                             | 0.00 | 1.09 | 0.65 | 0.00 | 1 | 2 | 2 | TNQEHAALAEANSK                  | 1                           |   |
| CEP35_HUMAN (Q5VT06) Centrosome-associated protein 350 (Centrosome-associated protein of 350 kDa) [MASS=350928]                                                                         | 0.00 | 1.51 | *    | *    | * | 4 | 3 | C[330]EETGNAYEDLSQKYKAAQEK      | 1                           |   |
| CEP41_HUMAN (Q9BYV8) Centrosomal protein of 41 kDa (Cep41 protein) (Testis-specific gene A14 protein) [MASS=41368]                                                                      | 0.00 | 4.56 | *    | *    | * | 1 | 1 | 1                               | KELEDQR                     | 1 |
| CFTR_HUMAN (P13569) Cystic fibrosis transmembrane conductance regulator (CFTR) (cAMP-dependent chloride channel) (ATP-binding cassette transporter sub-family C member 7) [MASS=168172] | 0.00 | 1.42 | *    | *    | * | 1 | 3 | 1                               | SYQLYGK                     | 1 |
| CG036_HUMAN (Q9NRH1) Protein C7orf36 [MASS=25299]                                                                                                                                       | 0.00 | 4.42 | 0.18 | 0.00 | 1 | 1 | 2 | 3                               | ELNATSRILDLM[147]SDGKVGESSK | 1 |
|                                                                                                                                                                                         |      |      |      |      |   |   |   | 2                               | DDFEVSSLLSLR                | 1 |
|                                                                                                                                                                                         |      |      |      |      |   |   |   | 3                               | SAQNLPGGGPASHSNPR           | 1 |
|                                                                                                                                                                                         |      |      |      |      |   |   |   | 3                               | RRQSVLNLM[147]THSVNQQQNIHR  | 1 |
|                                                                                                                                                                                         |      |      |      |      |   |   |   | 2                               | LC[330]ENNAEFNK             | 1 |

|                                                                                                                                                                                                                               |      |       |      |      |   |   |   |                                   |    |
|-------------------------------------------------------------------------------------------------------------------------------------------------------------------------------------------------------------------------------|------|-------|------|------|---|---|---|-----------------------------------|----|
| CH60_HUMAN (P10809) 60 kDa heat shock protein, mitochondrial precursor (Hsp60) (60 kDa chaperonin) (CPN60) (Heat shock protein 60) (HSP-60) (Mitochondrial matrix protein P1) (P60 lymphocyte protein) (HuCHA60) [MASS=61054] | 1.00 | 11.69 | 1.48 | 0.04 | 4 | 4 | 2 | C[339]EFQDAYVLLSEK                | 2  |
|                                                                                                                                                                                                                               |      |       |      |      |   |   | 3 | ALMLQGVDLLADAVAVTMGPK             | 1  |
|                                                                                                                                                                                                                               |      |       |      |      |   |   | 2 | AAVEEGIVLGGGC[339]ALLR            | 1  |
|                                                                                                                                                                                                                               |      |       |      |      |   |   | 2 | C[339]IPALDSLTPANEDQK             | 1  |
|                                                                                                                                                                                                                               |      |       |      |      |   |   | 3 | MGNLVIPLGKGRAGR                   | 10 |
| CI079_HUMAN (Q6ZUB1) Protein C9orf79 [MASS=157135]                                                                                                                                                                            | 0.00 | 1.04  | *    | *    | * | 1 |   |                                   |    |
| CIC_HUMAN (Q96RK0) Protein capicua homolog [MASS=163789]                                                                                                                                                                      | *    | 0.50  | *    | *    | * | 1 | 1 | FAELPEFR                          | 1  |
|                                                                                                                                                                                                                               |      |       |      |      |   |   | 1 | LPC[339]VAAK                      | 3  |
| CISY_HUMAN (O75390) Citrate synthase, mitochondrial precursor (EC 2.3.3.1) [MASS=51712]                                                                                                                                       | 0.00 | 6.87  | 2.06 | 0.00 | 1 | 3 | 2 | HLPNDPM[147]FKLVLAQLYK            | 1  |
|                                                                                                                                                                                                                               |      |       |      |      |   |   | 1 | GFSIPEC[339]QK                    | 1  |
|                                                                                                                                                                                                                               |      |       |      |      |   |   | 1 | LPC[330]VAAK                      | 1  |
| CJ070_HUMAN (Q9NZ45) Protein C10orf70 [MASS=12199]                                                                                                                                                                            | 0.62 | 10.19 | 1.38 | 0.00 | 1 | 1 | 2 | KFPFC[339]DGAHTK                  | 1  |
| CK5P2_HUMAN (Q96SN8) CDK5 regulatory subunit-associated protein 2 (CDK5 activator-binding protein C48) (Centrosome-associated protein 215) [MASS=215036]                                                                      | 0.00 | 2.48  | 2.83 | 0.00 | 1 | 3 | 3 | DGHGIC[339]VISRQHM[147]NTM[147]IK | 1  |
|                                                                                                                                                                                                                               |      |       |      |      |   |   | 3 | GNLELRPGGAHPGTC[330]SPSR          | 1  |
|                                                                                                                                                                                                                               |      |       |      |      |   |   | 2 | PSRSLGNM[147]YR                   | 1  |
| CLC11_HUMAN (Q9Y240) C-type lectin domain family 11 member A precursor (Stem cell growth factor) (Lymphocyte secreted C-type lectin) (p47) (C-type lectin superfamily member 3) [MASS=35694]                                  | 0.00 | 7.74  | 1.59 | 0.00 | 1 | 1 | 3 | DFEAQAAAQARC[339]TARGGSLAQPADR    | 1  |
| CLH2_HUMAN (P53675) Clathrin heavy chain 2 (CLH-22) [MASS=187029]                                                                                                                                                             | *    | 1.77  | *    | *    | * | 2 | 2 | FLQM[147]ARKK                     | 1  |
|                                                                                                                                                                                                                               |      |       |      |      |   |   | 3 | C[339]NEPAVWSQLAQAQLQKDLVK        | 1  |

|                                                                                                                                                                           |      |       |      |      |   |   |   |                                      |   |
|---------------------------------------------------------------------------------------------------------------------------------------------------------------------------|------|-------|------|------|---|---|---|--------------------------------------|---|
| CLK4_HUMAN (Q9HAZ1) Dual specificity protein kinase CLK4 (EC 2.7.12.1) (CDC-like kinase 4) [MASS=57492]                                                                   | 0.40 | 1.87  | 1.88 | 0.00 | 1 | 1 | 2 | THC[339]PDWDSR                       | 1 |
| CMC1_HUMAN (O75746) Calcium-binding mitochondrial carrier protein Aralar1 (Mitochondrial aspartate glutamate carrier 1) (Solute carrier family 25 member 12) [MASS=74755] | 1.00 | 4.42  | 1.48 | 0.07 | 5 | 2 | 2 | DIPFSAIYFPVYAHC[339]K                | 2 |
| CN159_HUMAN (Q7Z3D6) Protein C14orf159, mitochondrial precursor [MASS=66436]                                                                                              | *    | 1.62  | *    | *    | * | 1 | 3 | MPFTLHLRSR                           | 1 |
| CN37_HUMAN (P09543) 2',3'-cyclic-nucleotide 3'-phosphodiesterase (EC 3.1.4.37) (CNP) (CNPase) [MASS=47578]                                                                | 1.00 | 4.04  | 0.97 | 0.03 | 2 | 2 | 1 | FC[339]DYGK                          | 1 |
|                                                                                                                                                                           |      |       |      |      |   |   | 1 | FC[330]DYGK                          | 1 |
|                                                                                                                                                                           |      |       |      |      |   |   | 2 | RPPGVLHC[330]TTK                     | 1 |
| CNGB1_HUMAN (Q14028) Cyclic nucleotide-gated cation channel 4 (CNG channel 4) (CNG-4) (CNG4) (Cyclic nucleotide-gated cation channel modulatory subunit) [MASS=102284]    | *    | 1.54  | *    | *    | * | 1 | 3 | LIDPDVTSDEESPK                       | 1 |
| CNTP2_HUMAN (Q9UHC6) Contactin-associated protein-like 2 precursor (Cell recognition molecule Caspr2) [MASS=148166]                                                       | *    | 2.93  | *    | *    | * | 2 | 3 | NWKPYHQDGNIWAFPGNINSDGVVR            | 1 |
|                                                                                                                                                                           |      |       |      |      |   |   | 3 | TLTPWGVFLENMGK                       | 1 |
| CO039_HUMAN (Q6ZRI6) Uncharacterized protein C15orf39 [MASS=110788]                                                                                                       | 0.37 | 2.87  | 1.02 | 0.00 | 1 | 1 | 3 | AEEAAGEESC[339]GASPTPATASPPGPTLKAR   | 1 |
| CO2A1_HUMAN (P02458) Collagen alpha-1(II) chain precursor [Contains: Chondrocalcin] [MASS=134491]                                                                         | *    | 0.78  | *    | *    | * | 1 | 2 | GARGDSGPPGR                          | 1 |
| CO6A1_HUMAN (P12109) Collagen alpha-1(VI) chain precursor [MASS=108547]                                                                                                   | 0.00 | 5.25  | 1.37 | 0.00 | 1 | 2 | 3 | RLLLFSDGNSQGATPAAIEKAVQEAQR          | 1 |
|                                                                                                                                                                           |      |       |      |      |   |   | 3 | GEMGYPLPGC[339]KGSFGFDGIQGGPPGPK     | 1 |
| CO7_HUMAN (P10643) Complement component C7 precursor [MASS=93518]                                                                                                         | 0.00 | 2.61  | *    | *    | * | 1 | 3 | SFFRSSSSSSRSYSHTNEIHK                | 1 |
| COX7C_HUMAN (P15954) Cytochrome c oxidase polypeptide VIIc, mitochondrial precursor (EC 1.9.3.1) [MASS=7245]                                                              | 0.74 | 26.98 | 1.26 | 0.00 | 1 | 1 | 2 | M[147]C[339]LYFGSAFATPFLVVR          | 1 |
| CP045_HUMAN (Q96MC5) Uncharacterized protein C16orf45 [MASS=23732]                                                                                                        | *    | 7.84  | *    | *    | * | 1 | 3 | FM[147]M[147]DDIQLC[330]KDIM[147]DLK | 1 |
| CP135_HUMAN (Q66GS9) Centrosomal protein of 135 kDa (Cep135 protein) (Centrosomal protein 4) [MASS=133503]                                                                | 0.00 | 3.42  | 0.61 | 0.00 | 1 | 3 | 2 | GELESAQAQIKILEEK                     | 1 |
|                                                                                                                                                                           |      |       |      |      |   |   | 1 | SREIAFK                              | 1 |
|                                                                                                                                                                           |      |       |      |      |   |   | 2 | TIEHLTC[330]VNHQLESEK                | 1 |

|                                                                                                                                                                                                                                                                             |      |       |      |      |   |   |                                                                               |                                   |   |
|-----------------------------------------------------------------------------------------------------------------------------------------------------------------------------------------------------------------------------------------------------------------------------|------|-------|------|------|---|---|-------------------------------------------------------------------------------|-----------------------------------|---|
| CP27B_HUMAN (O15528) 25-hydroxyvitamin D-1 alpha hydroxylase, mitochondrial precursor (EC 1.14.13.13) (Cytochrome P450 subfamily XXVIIB polypeptide 1) (Cytochrome p450 27B1) (Calcidiol 1-monooxygenase) (25-OHD-1 alpha-hydroxylase) (25-hydroxyvitamin D(3) [MASS=56504] | *    | 2.56  | *    | *    | * | 1 | 3                                                                             | QRGRGTGPPALVR                     | 1 |
| CQ10B_HUMAN (Q9H8M1) Protein COQ10 B, mitochondrial precursor [MASS=27070]                                                                                                                                                                                                  | *    | 5.88  | *    | *    | * | 1 | 2                                                                             | TGHTALRRVMSGC[339]R               | 1 |
| CR2_HUMAN (P20023) Complement receptor type 2 precursor (Cr2) (Complement C3d receptor) (Epstein-Barr virus receptor) (EBV receptor) (CD21 antigen) [MASS=112973]                                                                                                           | 0.00 | 5.13  | 2.41 | 0.00 | 1 | 2 | 2 SDSKGGHGSWSGSPSPQC[330]LRSPVTR<br>3 TGTWSGPAPRC[339]ELSTSAVQC[339]PHPQILRGR | 1<br>1                            |   |
| CRTC_HUMAN (P27797) Calreticulin precursor (CRP55) (Calregulin) (HACBP) (ERp60) (grp60) [MASS=48141]                                                                                                                                                                        | 0.41 | 11.03 | 1.79 | 0.00 | 1 | 2 | 3 C[339]KDDEFTHLYTLIVRPDNTYEVK<br>3 PEDWDEEMDGEWEPPIQNPEYK                    | 1<br>1                            |   |
| CRYM_HUMAN (Q14894) Mu-crystallin homolog (NADP-regulated thyroid-hormone-binding protein) [MASS=33775]                                                                                                                                                                     | *    | 8.92  | *    | *    | * | 1 | 3                                                                             | TVVPVTKHRGYLGVMPAYSAEALTTK        | 1 |
| CS015_HUMAN (Q6ZRH7) Uncharacterized protein C19orf15 precursor [MASS=133043]                                                                                                                                                                                               | *    | 1.12  | *    | *    | * | 1 | 3                                                                             | AEPKEAVERQLM[147]T                | 1 |
| CSMD3_HUMAN (Q7Z407) CUB and sushi domain-containing protein 3 precursor (CUB and sushi multiple domains protein 3) [MASS=401695]                                                                                                                                           | 0.00 | 1.17  | 0.31 | 0.00 | 1 | 3 | 3 QPMTLTVTSFNASTGR<br>3 STVRYAC[330]DTGYILHGSEER<br>2 GFKLFPGK                | 1<br>1<br>2                       |   |
| CSN5_HUMAN (Q92905) COP9 signalosome complex subunit 5 (EC 3.4.-.-) (Signalosome subunit 5) (SGN5) (Jun activation domain-binding protein 1) [MASS=37447]                                                                                                                   | 0.00 | 12.61 | *    | *    | * | 2 | 3 M[147]VM[147]HARSGGNLEVMGLMLGK<br>3 LEQSEAQLGRGSFMLGLETHDR                  | 1<br>1                            |   |
| CSPG2_HUMAN (P13611) Versican core protein precursor (Large fibroblast proteoglycan) (Chondroitin sulfate proteoglycan core protein 2) (PG-M) (Glial hyaluronate-binding protein) (GHAP) [MASS=372817]                                                                      | *    | 0.38  | *    | *    | * | 1 | 3                                                                             | KSATVIPEIEGIK                     | 1 |
| CT032_HUMAN (Q9NQ75) HEF-like protein [MASS=87144]                                                                                                                                                                                                                          | 0.00 | 3.44  | 7.88 | 0.00 | 1 | 1 | 3                                                                             | PC[339]PPFLRGLLEEAPASSEETYQVPTLPR | 1 |



|                                                                                                                                                                                             |      |      |      |      |   |   |   |                                                |   |
|---------------------------------------------------------------------------------------------------------------------------------------------------------------------------------------------|------|------|------|------|---|---|---|------------------------------------------------|---|
| CT2NL_HUMAN (Q9P2B4) CTTNBP2 N-terminal-like protein [MASS=70158]                                                                                                                           | 0.00 | 1.25 | 2.53 | 0.00 | 1 | 1 | 3 | QC[339]KNM[147]QER                             | 1 |
| CTNB1_HUMAN (P35222) Beta-catenin [MASS=85496]                                                                                                                                              | *    | 1.28 | *    | *    | * | 1 | 2 | SPQMVSAIVR                                     | 1 |
| CTRO_HUMAN (O14578) Citron Rho-interacting kinase (EC 2.7.11.1) (CRIK) (Rho-interacting, serine/threonine-protein kinase 21) [MASS=231430]                                                  | *    | 1.78 | *    | *    | * | 3 | 2 | SLEQRIVELSEANK                                 | 1 |
|                                                                                                                                                                                             |      |      |      |      |   |   | 3 | LLGNSLLKLEGDDR                                 | 1 |
|                                                                                                                                                                                             |      |      |      |      |   |   | 2 | MHHNIPHR                                       | 1 |
| CU005_HUMAN (Q9Y3R5) Protein C21orf5 [MASS=258222]                                                                                                                                          | *    | 1.61 | *    | *    | * | 2 | 3 | PFRVLISLLDKPEIGPQVVGNIFFLEVIR                  | 1 |
|                                                                                                                                                                                             |      |      |      |      |   |   | 1 | PVDLLGATK                                      | 1 |
| CU063_HUMAN (P58658) Protein C21orf63 precursor (SUE21) [MASS=49483]                                                                                                                        | 0.25 | 7.03 | 2.54 | 0.00 | 1 | 1 | 3 | AALLFVSSVC[339]IGLALTLC[339]ALVIRESC[339]AKDFR | 1 |
| CUBN_HUMAN (O60494) Cubilin precursor (Intrinsic factor-cobalamin receptor) (Intrinsic factor-vitamin B12 receptor) (460 kDa receptor) (Intestinal intrinsic factor receptor) [MASS=398724] | *    | 0.22 | *    | *    | * | 1 | 1 | DGETLLGK                                       | 1 |
| CV106_HUMAN (Q6P0N0) Protein C14orf106 (P243) [MASS=129085]                                                                                                                                 | 0.00 | 1.50 | 0.27 | 0.00 | 1 | 1 | 2 | VIEQRC[330]MRYNLSAGTIK                         | 1 |
| CX038_HUMAN (Q8TB03) Protein CXorf38 [MASS=36670]                                                                                                                                           | 0.38 | 2.82 | 1.14 | 0.00 | 1 | 1 | 3 | LDSLCL[339]LHQB                                | 1 |
| CY1_HUMAN (P08574) Cytochrome c1, heme protein, mitochondrial precursor (Cytochrome c-1) [MASS=35390]                                                                                       | 1.00 | 6.15 | 1.58 | 0.06 | 2 | 2 | 1 | DVC[339]TFLR                                   | 1 |
|                                                                                                                                                                                             |      |      |      |      |   |   | 2 | HLVGVC[339]YTEDEAK                             | 1 |
| CYTN_HUMAN (P01037) Cystatin SN precursor (Salivary cystatin SA-1) (Cystatin SA-1) [MASS=16362]                                                                                             | *    | 4.26 | *    | *    | * | 1 | 1 | SLVKSR                                         | 1 |
| DCX_HUMAN (O43602) Neuronal migration protein doublecortin (Lissencephalin-X) (Lis-X) (Dublin) [MASS=44925]                                                                                 | 0.00 | 4.73 | 1.25 | 0.00 | 1 | 1 | 3 | FRYAQDDFSLDENEC[339]RVM[147]K                  | 1 |
|                                                                                                                                                                                             |      |      |      |      |   |   | 3 | ILPQDVILKFR                                    | 6 |
| DDX27_HUMAN (Q96GQ7) Probable ATP-dependent RNA helicase DDX27 (EC 3.6.1.-) (DEAD box protein 27) [MASS=89835]                                                                              | 0.00 | 1.38 | *    | *    | * | 1 |   |                                                |   |
| DGAT1_HUMAN (O75907) Diacylglycerol O-acyltransferase 1 (EC 2.3.1.20) (Diglyceride acyltransferase) (ACAT-related gene product 1) [MASS=55278]                                              | 0.00 | 7.38 | *    | *    | * | 2 | 3 | GSSKWM[147]ARTGVFLASAFFHEYLVSVPLR              | 1 |
|                                                                                                                                                                                             |      |      |      |      |   |   | 1 | AKAASAGK                                       | 2 |

|                                                                                                                                                                            |      |      |      |      |   |   |                                                                                  |                                      |   |
|----------------------------------------------------------------------------------------------------------------------------------------------------------------------------|------|------|------|------|---|---|----------------------------------------------------------------------------------|--------------------------------------|---|
| DGKB_HUMAN (Q9Y6T7) Diacylglycerol kinase beta (EC 2.7.1.107) (Diglyceride kinase beta) (DGK-beta) (DAG kinase beta) (90 kDa diacylglycerol kinase) [MASS=90595]           | 0.00 | 2.61 | 0.60 | 0.00 | 1 | 1 | 3                                                                                | RNTDVM[147]HHYWVEGNC[330]PTKC[330]DK | 1 |
| DGKQ_HUMAN (P52824) Diacylglycerol kinase theta (EC 2.7.1.107) (Diglyceride kinase theta) (DGK-theta) (DAG kinase theta) [MASS=101403]                                     | *    | 1.38 | *    | *    | * | 1 | 2                                                                                | QVSQTRFYVAESR                        | 1 |
| DHE3_HUMAN (P00367) Glutamate dehydrogenase 1, mitochondrial precursor (EC 1.4.1.3) (GDH) [MASS=61397]                                                                     | 1.00 | 5.02 | 1.44 | 0.07 | 3 | 2 | 2 IIKPC[339]NHVLSLSFPIR<br>2 C[339]AVVDVPPFGGAK                                  | 1<br>2                               |   |
| DHSA_HUMAN (P31040) Succinate dehydrogenase [ubiquinone] flavoprotein subunit, mitochondrial precursor (EC 1.3.5.1) (Fp) (Flavoprotein subunit of complex II) [MASS=72691] | 1.00 | 6.78 | 1.20 | 0.03 | 2 | 2 | 3 HVNGQDQIVPGLYAC[339]GEAAC[339]ASVHGANR<br>2 AAFGLSEAGFNTAC[339]VTK             | 1<br>1                               |   |
| DHSB_HUMAN (P21912) Succinate dehydrogenase [ubiquinone] iron-sulfur protein, mitochondrial precursor (EC 1.3.5.1) (Ip) (Iron-sulfur subunit of complex II) [MASS=31630]   | 0.66 | 3.93 | 1.75 | 0.00 | 1 | 1 | 2 C[339]GPM[147]VLDALIK                                                          | 1                                    |   |
| DIDO1_HUMAN (Q9BTC0) Death-inducer obliterator 1 (DIO-1) (Death-associated transcription factor 1) (DATF-1) (hDido1) [MASS=243871]                                         | *    | 2.19 | *    | *    | * | 5 | 1 NLVPPK<br>1 ISSVHK<br>2 TKLHNESK<br>2 SVMESRTKLHNESK<br>2 PNIILGLVIC[330]QKIKR | 1<br>1<br>1<br>1<br>1                |   |
| DJBP_HUMAN (Q5THR3) DJ-1-binding protein (CAP-binding protein complex-interacting protein 1) [MASS=172929]                                                                 | *    | 0.80 | *    | *    | * | 1 | 3 LLGSASSEDIWR                                                                   | 1                                    |   |
| DLDH_HUMAN (P09622) Dihydrolipoyl dehydrogenase, mitochondrial precursor (EC 1.8.1.4) (Dihydrolipoamide dehydrogenase) (Glycine cleavage system L protein) [MASS=54150]    | 1.00 | 4.91 | 1.16 | 0.05 | 2 | 2 | 2 VC[330]HAHPTLSEAFR<br>2 NFQRILQKQGFK<br>2 VC[339]HAHPTLSEAFR                   | 1<br>1<br>1                          |   |
| DLG2_HUMAN (Q15700) Discs large homolog 2 (Postsynaptic density protein PSD-93) (Channel-associated protein of synapse-110) (Chapsyn-110) [MASS=97542]                     | *    | 1.38 | *    | *    | * | 1 | 3 IIDGGAAQKDGR                                                                   | 1                                    |   |

|                                                                                                                                           |      |       |      |      |   |   |                                                                 |                            |   |
|-------------------------------------------------------------------------------------------------------------------------------------------|------|-------|------|------|---|---|-----------------------------------------------------------------|----------------------------|---|
| DLG3_HUMAN (Q92796) Discs large homolog 3 (Synapse-associated protein 102) (SAP102) (Neuroendocrine-DLG) (XLMR) [MASS=90343]              | 0.69 | 2.57  | 1.58 | 0.00 | 1 | 1 | 3                                                               | IIPGGAAAMDGRLGVNDC[339]VLR | 1 |
| DLG5_HUMAN (Q8TDM6) Discs large homolog 5 (Placenta and prostate DLG) (Discs large protein P-dlg) [MASS=202085]                           | 0.00 | 1.00  | 1.56 | 0.00 | 1 | 2 | 1 LIM[147]SER<br>2 SC[339]QDSLTLSELLK                           | 1<br>1                     |   |
| DMXL2_HUMAN (Q8TDJ6) Protein DmX-like 2 (Rabconnectin-3) [MASS=339755]                                                                    | *    | 0.26  | *    | *    | * | 1 | 1 SLAYWVMK                                                      | 1                          |   |
| DNL3_HUMAN (P49916) DNA ligase 3 (EC 6.5.1.1) (DNA ligase III) (Polydeoxyribonucleotide synthase [ATP] 3) [MASS=102690]                   | *    | 1.74  | *    | *    | * | 1 | 3 VLHNAQEVEKEPGQRR                                              | 1                          |   |
| DOCK7_HUMAN (Q96N67) Dedicator of cytokinesis protein 7 [MASS=174363]                                                                     | *    | 0.78  | *    | *    | * | 1 | 2 IANM[147]FELSVPFR                                             | 1                          |   |
| DOCK8_HUMAN (Q8NF50) Dedicator of cytokinesis protein 8 [MASS=230819]                                                                     | 0.00 | 0.54  | 0.95 | 0.00 | 1 | 1 | 2 LRLC[330]FKEFIMR                                              | 1                          |   |
| DOCK9_HUMAN (Q9BZ29) Dedicator of cytokinesis protein 9 (Cdc42 guanine nucleotide exchange factor zizimin 1) [MASS=236444]                | 0.00 | 2.17  | *    | *    | * | 2 | 3 GSVLLAKPKLIEPLDYENVIVQK<br>3 QM[147]LATTSPALM[147]NGSGQSPSVLK | 1<br>1                     |   |
| DPCA2_HUMAN (Q86SG4) Dresden prostate carcinoma 2 protein (D-PCa-2) [MASS=20403]                                                          | 0.00 | 13.37 | 1.80 | 0.00 | 1 | 2 | 2 M[147]EPWAMR<br>3 AEQC[339]EEEEAM[147]TPRPTK                  | 1<br>1                     |   |
| DPOD1_HUMAN (P28340) DNA polymerase delta catalytic subunit (EC 2.7.7.7) (DNA polymerase subunit delta p125) [MASS=123630]                | 0.00 | 3.07  | 4.99 | 0.00 | 1 | 2 | 2 LAVYC[339]LKDAYLPLRLLER<br>2 IAPLRVLSFDIEC[330]AGR            | 1<br>1                     |   |
| DPYL2_HUMAN (Q16555) Dihydropyrimidinase-related protein 2 (DRP-2) (Collapsin response mediator protein 2) (CRMP-2) (N2A3) [MASS=62293]   | 1.00 | 8.22  | 0.58 | 0.05 | 5 | 3 | 2 AITIANQTNC[330]PLYITK<br>2 FQLTDC[330]QIYEVLSVIR              | 1<br>2                     |   |
| DSCAM_HUMAN (O60469) Down syndrome cell adhesion molecule precursor (CHD2) [MASS=222258]                                                  | 1.00 | 1.49  | *    | *    | * | 2 | 2 FQLTDC[339]QIYEVLSVIR<br>2 GLYDGPVC[330]EVSVTPK               | 1<br>1                     |   |
| DSCL1_HUMAN (Q8TD84) Down syndrome cell adhesion molecule-like protein 1 precursor (Down syndrome cell adhesion molecule 2) [MASS=224461] | 0.00 | 1.51  | *    | *    | * | 2 | 3 GYQIGYRENSPGSNGQYSIVEM[147]K<br>2 NITAVAGR                    | 1<br>1                     |   |

|                                                                                                                                                                                                                                                                             |      |      |      |      |   |   |             |                                                         |             |
|-----------------------------------------------------------------------------------------------------------------------------------------------------------------------------------------------------------------------------------------------------------------------------|------|------|------|------|---|---|-------------|---------------------------------------------------------|-------------|
| DSCR2_HUMAN (O95456) Down syndrome critical region protein 2 (Leucine-rich protein C21-LRP) [MASS=32854]                                                                                                                                                                    | 0.39 | 3.47 | 2.57 | 0.00 | 1 | 1 | 2           | NM[147]QITILTC[330]R                                    | 1           |
| DYH11_HUMAN (Q96DT5) Ciliary dynein heavy chain 11 (Axonemal beta dynein heavy chain 11) [MASS=520977]                                                                                                                                                                      | *    | 0.40 | *    | *    | * | 2 | 2<br>2      | MSAQMNR<br>FFMARVRLQLK                                  | 1<br>1      |
| DYHC_HUMAN (Q14204) Dynein heavy chain, cytosolic (DYHC) (Cytoplasmic dynein heavy chain 1) (DHC1) (Dynein heavy chain 1, cytoplasmic 1) [MASS=532404]                                                                                                                      | *    | 0.69 | *    | *    | * | 3 | 3<br>1<br>3 | C[330]LGSLFSM[147]LHQAC[339]R<br>DQLGTAK<br>YGTQRVISFIR | 1<br>1<br>1 |
| DYN1_HUMAN (Q05193) Dynamamin-1 (EC 3.6.5.5) [MASS=97407]                                                                                                                                                                                                                   | 0.96 | 1.62 | 0.84 | 0.00 | 1 | 1 | 2           | C[330]VDM[147]VISELISTVR                                | 1           |
| DYSF_HUMAN (O75923) Dysferlin (Dystrophy-associated fer-1-like protein) (Fer-1-like protein 1) [MASS=237293]                                                                                                                                                                | *    | 0.58 | *    | *    | * | 1 | 3           | SLRTDALLGEFR                                            | 1           |
| E2AK1_HUMAN (Q9BQ13) Eukaryotic translation initiation factor 2-alpha kinase 1 (EC 2.7.11.1) (Heme-regulated eukaryotic initiation factor eIF-2-alpha kinase) (Heme-regulated inhibitor) (Heme-controlled repressor) (HCR) (Hemin-sensitive initiation factor) [MASS=71106] | 0.00 | 2.22 | 0.36 | 0.00 | 1 | 1 | 2           | IGDFGLAC[330]TDILQK                                     | 1           |
| E2F1_HUMAN (Q01094) Transcription factor E2F1 (E2F-1) (Retinoblastoma-binding protein 3) (RBBP-3) (PRB-binding protein E2F-1) (PBR3) (Retinoblastoma-associated protein 1) (RBAP-1) [MASS=46920]                                                                            | *    | 1.60 | *    | *    | * | 1 | 1           | SPGEKSR                                                 | 1           |
| E41L1_HUMAN (Q9H4G0) Band 4.1-like protein 1 (Neuronal protein 4.1) (4.1N) [MASS=98502]                                                                                                                                                                                     | *    | 2.04 | *    | *    | * | 1 | 3           | EAKLQHPDM[147]LVTKAVVYR                                 | 1           |
| E41L3_HUMAN (Q9Y2J2) Band 4.1-like protein 3 (4.1B) (Differentially expressed in adenocarcinoma of the lung protein 1) (DAL-1) [MASS=120677]                                                                                                                                | *    | 1.20 | *    | *    | * | 1 | 3           | AQELEKTQDDL[M][147]K                                    | 1           |
| EAA2_HUMAN (P43004) Excitatory amino acid transporter 2 (Sodium-dependent glutamate/aspartate transporter 2) [MASS=62104]                                                                                                                                                   | *    | 5.75 | *    | *    | * | 1 | 3           | VLVAPPPDEEANATSAVVSLNETVTEVPEETK                        | 1           |

|                                                                                                                                                                                                                                                              |      |       |      |      |   |   |   |                                    |   |
|--------------------------------------------------------------------------------------------------------------------------------------------------------------------------------------------------------------------------------------------------------------|------|-------|------|------|---|---|---|------------------------------------|---|
| ECHA_HUMAN (P40939) Trifunctional enzyme subunit alpha, mitochondrial precursor (TP-alpha) (78 kDa gastrin-binding protein) [Includes: Long-chain enoyl-CoA hydratase (EC 4.2.1.17); Long chain 3-hydroxyacyl-CoA dehydrogenase (EC 1.1.1.211)] [MASS=82999] | *    | 1.44  | *    | *    | * | 1 | 2 | C[339]LAPM[147]MSEVIR              | 1 |
| ECHM_HUMAN (P30084) Enoyl-CoA hydratase, mitochondrial precursor (EC 4.2.1.17) (Short chain enoyl-CoA hydratase) (SCEH) (Enoyl-CoA hydratase 1) [MASS=31387]                                                                                                 | 1.00 | 12.07 | 1.88 | 0.04 | 3 | 2 | 2 | ALNALC[339]DGLIDELNQALK            | 1 |
|                                                                                                                                                                                                                                                              |      |       |      |      |   |   | 2 | IC[339]PVETLVVEEAIQC[339]AEK       | 2 |
| ECHP_HUMAN (Q08426) Peroxisomal bifunctional enzyme (PBE) (PBFE) [Includes: Enoyl-CoA hydratase (EC 4.2.1.17); 3,2-trans-enoil-CoA isomerase (EC 5.3.3.8); 3-hydroxyacyl-CoA dehydrogenase (EC 1.1.1.35)] [MASS=79208]                                       | 0.00 | 4.16  | 0.26 | 0.00 | 1 | 2 | 3 | LC[330]NKPIQSLPNMDSIFSEALLKMR      | 1 |
|                                                                                                                                                                                                                                                              |      |       |      |      |   |   | 1 | GFSAPR                             | 4 |
| EDN1_HUMAN (P05305) Endothelin-1 precursor (Preproendothelin-1) (PPET1) [Contains: Endothelin-1 (ET-1); Big endothelin-1] [MASS=24425]                                                                                                                       | 0.00 | 4.25  | 1.96 | 0.00 | 1 | 1 | 3 | KC[330]IYQQLVR                     | 1 |
| EF1A1_HUMAN (P68104) Elongation factor 1-alpha 1 (EF-1-alpha-1) (Elongation factor 1 A-1) (eEF1A-1) (Elongation factor Tu) (EF-Tu) [MASS=50141]                                                                                                              | 0.66 | 8.66  | 1.04 | 0.00 | 1 | 2 | 3 | DGNASGTTLLEALDC[339]ILPPTTRPTDKPLR | 1 |
|                                                                                                                                                                                                                                                              |      |       |      |      |   |   | 2 | DM[147]RQTVAVGVK                   | 1 |
| EF1A2_HUMAN (Q05639) Elongation factor 1-alpha 2 (EF-1-alpha-2) (Elongation factor 1 A-2) (eEF1A-2) (Statin S1) [MASS=50470]                                                                                                                                 | *    | 1.51  | *    | *    | * | 1 | 1 | VETGILR                            | 1 |
| EFTU_HUMAN (P49411) Elongation factor Tu, mitochondrial precursor (EF-Tu) (P43) [MASS=49541]                                                                                                                                                                 | *    | 3.10  | *    | *    | * | 1 | 3 | LLDAVDTYIPVPAR                     | 1 |
| ENK8_HUMAN (Q9HDB8) HERV-K_3q12.3 provirus ancestral Env polyprotein (Envelope polyprotein) (HERV-K(II) envelope protein) [Includes: Truncated surface protein (SU)] [MASS=27904]                                                                            | 0.00 | 7.76  | 0.99 | 0.00 | 1 | 1 | 2 | C[339]PAKPEEEGM[147]M[147]INISIVYR | 1 |

|                                                                                                                                                                                                                                                                              |      |      |      |      |   |   |   |                                         |   |
|------------------------------------------------------------------------------------------------------------------------------------------------------------------------------------------------------------------------------------------------------------------------------|------|------|------|------|---|---|---|-----------------------------------------|---|
| ENOG_HUMAN (P09104) Gamma-enolase (EC 4.2.1.11) (2-phospho-D-glycerate hydrolyase) (Neural enolase) (Neuron-specific enolase) (NSE) (Enolase 2) [MASS=47137]                                                                                                                 | 0.99 | 4.85 | 0.64 | 0.00 | 1 | 2 | 1 | QRYLGK                                  | 1 |
|                                                                                                                                                                                                                                                                              |      |      |      |      |   |   | 2 | VNQIGSVTEAIQAC[330]K                    | 1 |
| ENP2_HUMAN (Q9Y5L3) Ectonucleoside triphosphate diphosphohydrolase 2 (EC 3.6.1.-) (NTPDase2) (Ecto-ATPase) (CD39 antigen-like 1) [MASS=53665]                                                                                                                                | 0.00 | 5.45 | *    | *    | * | 1 | 3 | DVREPPALKYGIVLDAGSSHTSM[147]FIYK        | 1 |
| ENP3_HUMAN (O75355) Ectonucleoside triphosphate diphosphohydrolase 3 (EC 3.6.1.5) (NTPDase3) (Ecto-ATP diphosphohydrolase) (ATPDase) (Ecto-apyrase) (CD39 antigen-like 3) (HB6) [MASS=59133]                                                                                 | *    | 2.46 | *    | *    | * | 1 | 3 | HSEHAFDHAVDSD                           | 1 |
| EPHA4_HUMAN (P54764) Ephrin type-A receptor 4 precursor (EC 2.7.10.1) (Tyrosine-protein kinase receptor SEK) (Receptor protein-tyrosine kinase HEK8) [MASS=109859]                                                                                                           | *    | 1.93 | *    | *    | * | 1 | 3 | C[339]PPHSYSVWEGATSC[330]TC[339]DR      | 1 |
| EPHB1_HUMAN (P54762) Ephrin type-B receptor 1 precursor (EC 2.7.10.1) (Tyrosine-protein kinase receptor EPH-2) (NET) (HEK6) (ELK) [MASS=109885]                                                                                                                              | 0.00 | 3.25 | 1.28 | 0.00 | 1 | 2 | 3 | ARTVAGYGFSGK                            | 1 |
|                                                                                                                                                                                                                                                                              |      |      |      |      |   |   | 3 | LYC[339]NGDGEWM[147]VPIGRC[339]TC[339]K | 1 |
| ERN2_HUMAN (Q76MJ5) Serine/threonine-protein kinase/endoribonuclease IRE2 precursor (Inositol-requiring protein 2) (hIRE2p) (IRE1b) (Ire1-beta) (Endoplasmic reticulum-to-nucleus signaling 2) [Includes: Serine/threonine-protein kinase (EC 2.7.11.1); Endor [MASS=102250] | 0.00 | 5.84 | 0.11 | 0.00 | 1 | 2 | 3 | SC[330]ASESLFLPYPPDSEAR                 | 1 |
|                                                                                                                                                                                                                                                                              |      |      |      |      |   |   | 3 | ALVHTGVALVPRGLTLAPTDGPTTDEVTLQVSGER     | 1 |
| ES1_HUMAN (P30042) ES1 protein homolog, mitochondrial precursor (Protein KNP-1) (Protein GT335) [MASS=28142]                                                                                                                                                                 | *    | 5.97 | *    | *    | * | 1 | 3 | WPYAGTAEAIKALGAK                        | 1 |
| ETFD_HUMAN (Q16134) Electron transfer flavoprotein-ubiquinone oxidoreductase, mitochondrial precursor (EC 1.5.5.1) (ETF-QO) (ETF-ubiquinone oxidoreductase) (ETF dehydrogenase) (Electron-transferring-flavoprotein dehydrogenase) [MASS=68507]                              | 0.00 | 5.67 | 1.66 | 0.00 | 1 | 3 | 1 | GSDFER                                  | 1 |
|                                                                                                                                                                                                                                                                              |      |      |      |      |   |   | 3 | FDLRANC[339]EPQTYGIGLK                  | 1 |
|                                                                                                                                                                                                                                                                              |      |      |      |      |   |   | 2 | LQINAQNC[339]VHC[339]K                  | 1 |

|                                                                                                                                                                                                                                   |      |       |      |      |   |   |   |                               |   |
|-----------------------------------------------------------------------------------------------------------------------------------------------------------------------------------------------------------------------------------|------|-------|------|------|---|---|---|-------------------------------|---|
| ETS1_HUMAN (P14921) C-ets-1 protein (p54) [MASS=50408]                                                                                                                                                                            | 0.00 | 3.63  | 1.71 | 0.00 | 1 | 1 | 2 | SC[339]QSFISWTGDGWEFK         | 1 |
| EVI2B_HUMAN (P34910) EVI2B protein precursor (Ecotropic viral integration site 2B protein) [MASS=48682]                                                                                                                           | 0.00 | 3.79  | 3.58 | 0.00 | 1 | 1 | 3 | SPFADGETPDIC[339]MDNIR        | 1 |
| F102B_HUMAN (Q5T8I3) Protein FAM102B [MASS=35629]                                                                                                                                                                                 | 0.00 | 14.29 | *    | *    | * | 3 | 3 | RC[339]LLEGYDTK               | 1 |
|                                                                                                                                                                                                                                   |      |       |      |      |   |   | 2 | VGSGAYEQVVIKR                 | 1 |
|                                                                                                                                                                                                                                   |      |       |      |      |   |   | 3 | AYAKLGFADLNLAEFAGSGNTTRR      | 1 |
| F13B_HUMAN (P05160) Coagulation factor XIII B chain precursor (Protein-glutamine gamma-glutamyltransferase B chain) (Transglutaminase B chain) (Fibrin-stabilizing factor B subunit) [MASS=75491]                                 | 0.00 | 2.42  | 1.50 | 0.00 | 1 | 1 | 3 | YEGKVLHGDLIDFVC[339]K         | 1 |
| F264_HUMAN (Q16877) 6-phosphofructo-2-kinase/fructose-2,6-biphosphatase 4 (6PF-2-K/Fru-2,6-P2ASE testis-type isozyme) [Includes: 6-phosphofructo-2-kinase (EC 2.7.1.105); Fructose-2,6-bisphosphatase (EC 3.1.3.46)] [MASS=53908] | 0.00 | 3.85  | 0.82 | 0.00 | 1 | 1 | 2 | C[330]LLAYFLDKAAEQLPYLK       | 1 |
| FA20A_HUMAN (Q96MK3) Protein FAM20A precursor [MASS=61404]                                                                                                                                                                        | 0.00 | 5.18  | *    | *    | * | 1 | 3 | ASSLARDSAAAASDPGTIVHNFSTRTEPR | 1 |
| FA5_HUMAN (P12259) Coagulation factor V precursor (Activated protein C cofactor) [Contains: Coagulation factor V heavy chain; Coagulation factor V light chain] [MASS=251670]                                                     | *    | 1.03  | *    | *    | * | 2 | 2 | PWEDLPSQDTGSPSR               | 1 |
|                                                                                                                                                                                                                                   |      |       |      |      |   |   | 2 | HTVNPNMK                      | 1 |
| FAAA_HUMAN (P16930) Fumarylacetoacetase (EC 3.7.1.2) (Fumarylacetoacetate hydrolase) (Beta-diketonase) (FAA) [MASS=46374]                                                                                                         | 0.00 | 6.21  | *    | *    | * | 1 | 3 | LLDMELEMAFFVGPNGNRLGEPISK     | 1 |
| FAAH_HUMAN (O00519) Fatty-acid amide hydrolase (EC 3.1.-.-) (Oleamide hydrolase) (Anandamide amidohydrolase) [MASS=63065]                                                                                                         | 0.00 | 4.32  | 0.77 | 0.00 | 1 | 2 | 2 | LSAFLSNM[147]K                | 2 |
|                                                                                                                                                                                                                                   |      |       |      |      |   |   | 2 | GDFVDPC[330]LGDLVSILK         | 1 |
| FANCM_HUMAN (Q8IYD8) Fanconi anemia group M protein (EC 3.6.1.-) (ATP-dependent RNA helicase FANCM) (Protein FACM) (Fanconi anemia-associated polypeptide of 250 kDa) (FAAP250) (Protein Hef ortholog) [MASS=232190]              | *    | 1.17  | *    | *    | * | 2 | 2 | NELGRNEDFM[147]K              | 1 |
|                                                                                                                                                                                                                                   |      |       |      |      |   |   | 2 | SKNELGRNEDFMK                 | 1 |

|                                                                                                                                                                              |      |       |      |      |   |   |   |                                              |   |
|------------------------------------------------------------------------------------------------------------------------------------------------------------------------------|------|-------|------|------|---|---|---|----------------------------------------------|---|
| FARP2_HUMAN (O94887) FERM, RhoGEF and pleckstrin domain-containing protein 2 (FERM domain including RhoGEF) (FIR) [MASS=119888]                                              | *    | 0.76  | *    | *    | * | 1 | 2 | LLDQPKPK                                     | 1 |
| FBLN2_HUMAN (P98095) Fibulin-2 precursor [MASS=126543]                                                                                                                       | *    | 0.51  | *    | *    | * | 1 | 1 | AVLEPR                                       | 3 |
| FBN1_HUMAN (P35555) Fibrillin-1 precursor [MASS=312312]                                                                                                                      | *    | 0.77  | *    | *    | * | 2 | 3 | HGQC[339]INTDGSYR                            | 1 |
|                                                                                                                                                                              |      |       |      |      |   |   | 3 | M[147]IPSLC[339]THGK                         | 2 |
| FBW1A_HUMAN (Q9Y297) F-box/WD repeat protein 1A (F-box and WD repeats protein beta-TrCP) (E3RSIkappaB) (pIkappaBalpha-E3 receptor subunit) [MASS=68866]                      | 0.00 | 8.10  | 0.44 | 0.00 | 1 | 3 | 3 | IIQDIETIESNWRC[330]GR                        | 1 |
|                                                                                                                                                                              |      |       |      |      |   |   | 1 | DFITALPAR                                    | 1 |
|                                                                                                                                                                              |      |       |      |      |   |   | 3 | FM[147]C[339]SM[147]PRSLWLGC[330]SSLADSMPSLR | 1 |
| FBX25_HUMAN (Q8TCJ0) F-box only protein 25 [MASS=43312]                                                                                                                      | *    | 1.91  | *    | *    | * | 1 | 1 | HLILSEK                                      | 1 |
| FBX5_HUMAN (Q9UKT4) F-box only protein 5 (Early mitotic inhibitor 1) [MASS=50146]                                                                                            | 0.00 | 3.36  | 1.88 | 0.00 | 1 | 1 | 2 | MKC[339]DFNC[339]NHVHSGLK                    | 1 |
| FCN3_HUMAN (O75636) Ficolin-3 precursor (Collagen/fibrinogen domain-containing protein 3) (Collagen/fibrinogen domain-containing lectin 3 p35) (Hakata antigen) [MASS=32903] | *    | 5.35  | *    | *    | * | 1 | 2 | SNLNTRYAVSEAAAHK                             | 1 |
| FGD2_HUMAN (Q7Z6J4) FYVE, RhoGEF and PH domain-containing protein 2 (Zinc finger FYVE domain-containing protein 4) [MASS=74892]                                              | 0.00 | 4.43  | *    | *    | * | 1 | 3 | AAAQGPEGDIQEELQSEELGLRAPQWVR                 | 1 |
| FGD3_HUMAN (Q5JSP0) FYVE, RhoGEF and PH domain-containing protein 3 (Zinc finger FYVE domain-containing protein 5) [MASS=79400]                                              | 0.00 | 2.34  | 6.82 | 0.00 | 1 | 1 | 3 | TIPLPSC[339]KLSVPDPEER                       | 1 |
| FGF19_HUMAN (O95750) Fibroblast growth factor 19 precursor (FGF-19) [MASS=24002]                                                                                             | 0.00 | 11.57 | *    | *    | * | 1 | 3 | NRGFLPLSHFLPMLPM[147]VPEEPEDLR               | 1 |
| FHL2_HUMAN (Q14192) Four and a half LIM domains protein 2 (FHL-2) (Skeletal muscle LIM-protein 3) (SLIM 3) (LIM-domain protein DRAL) [MASS=32196]                            | 0.00 | 2.87  | 0.18 | 0.00 | 1 | 1 | 2 | C[330]SLSLVGR                                | 1 |



|                                                                                                                                                                                                                           |      |      |      |      |   |   |        |                                                     |        |
|---------------------------------------------------------------------------------------------------------------------------------------------------------------------------------------------------------------------------|------|------|------|------|---|---|--------|-----------------------------------------------------|--------|
| FKB10_HUMAN (Q96AY3) FK506-binding protein 10 precursor (EC 5.2.1.8) (Peptidyl-prolyl cis-trans isomerase) (PPIase) (Rotamase) (65 kDa FK506-binding protein) (FKBP65) (Immunophilin FKBP65) [MASS=64245]                 | *    | 3.09 | *    | *    | * | 1 | 2      | AQVSEGGKRLMPGQDPEK                                  | 1      |
| FLNC_HUMAN (Q14315) Filamin-C (Gamma-filamin) (Filamin-2) (Protein FLNc) (Actin-binding-like protein) (ABP-L) (ABP-280-like protein) [MASS=290957]                                                                        | 0.00 | 1.50 | 2.50 | 0.00 | 1 | 2 | 3<br>3 | FTVETRAGAGTGGLGLAIEGPSEAKMSC[339]K<br>YGGPQHIVGSPFK | 1<br>1 |
| FOLC_HUMAN (Q05932) Folylpolyglutamate synthase, mitochondrial precursor (EC 6.3.2.17) (Folylpoly-gamma-glutamate synthetase) (FPGS) (Tetrahydrofolate synthase) (Tetrahydrofolylpolyglutamate synthase) [MASS=64609]     | 0.00 | 3.58 | 2.79 | 0.00 | 1 | 1 | 3      | LYHRLEETKDGSC[339]VSMPPYFR                          | 1      |
| FOXN4_HUMAN (Q96NZ1) Forkhead box protein N4 [MASS=55214]                                                                                                                                                                 | 0.00 | 2.90 | *    | *    | * | 1 | 3      | MIESDTSSIMSGIIR                                     | 1      |
| FRAP_HUMAN (P42345) FKBP12-rapamycin complex-associated protein (FK506-binding protein 12-rapamycin complex-associated protein 1) (Rapamycin target protein) (RAPT1) (Mammalian target of rapamycin) (mTOR) [MASS=288890] | *    | 0.71 | *    | *    | * | 1 | 2      | M[147]LSLVLMHKPLRHPGM[147]PK                        | 1      |
| FREM1_HUMAN (Q5H8C1) FRAS1-related extracellular matrix protein 1 precursor (Protein QBRICK) [MASS=244122]                                                                                                                | *    | 0.69 | *    | *    | * | 1 | 3      | GFLFTVADLQAGVVR                                     | 1      |
| FRS3_HUMAN (O43559) Fibroblast growth factor receptor substrate 3 (FGFR substrate 3) (Suc1-associated neurotrophic factor target 2) (SNT-2) (FGFR signaling adaptor SNT2) [MASS=54330]                                    | 0.00 | 1.63 | 0.17 | 0.00 | 1 | 1 | 3      | WPYLC[330]LRR                                       | 2      |
| FVT1_HUMAN (Q06136) 3-ketodihydrosphingosine reductase precursor (EC 1.1.1.102) (3-dehydrosphinganine reductase) (KDS reductase) (Follicular variant translocation protein 1) (FVT-1) [MASS=36187]                        | 0.00 | 5.42 | 2.02 | 0.00 | 1 | 1 | 2      | LGPVDMLVNC[339]AGMAVSGK                             | 1      |

|                                                                                                                                                                                                                                                                             |      |       |      |      |   |   |        |                                                    |        |
|-----------------------------------------------------------------------------------------------------------------------------------------------------------------------------------------------------------------------------------------------------------------------------|------|-------|------|------|---|---|--------|----------------------------------------------------|--------|
| FXL13_HUMAN (Q8NEE6) F-box/LRR-repeat protein 13 (F-box and leucine-rich repeat protein 13) [MASS=83941]                                                                                                                                                                    | *    | 1.63  | *    | *    | * | 1 | 1      | ITDSAMEMLSAK                                       | 1      |
| FXL16_HUMAN (Q8N461) F-box/LRR-repeat protein 16 (F-box and leucine-rich repeat protein 16) [MASS=51641]                                                                                                                                                                    | *    | 5.43  | *    | *    | * | 1 | 3      | AM[147]SLKRSTITDAGLEVMLEQM[147]QGVVR               | 1      |
| FYV1_HUMAN (Q9Y2I7) FYVE finger-containing phosphoinositide kinase (EC 2.7.1.68) (1-phosphatidylinositol-4-phosphate 5-kinase) (Phosphatidylinositol-3-phosphate 5-kinase type III) (PIP5K) (PtdIns(4)P-5-kinase) (PIKfyve) (p235) [MASS=237107]                            | *    | 0.38  | *    | *    | * | 1 | 2      | KTYSLAFK                                           | 1      |
| G3P_HUMAN (P04406) Glyceraldehyde-3-phosphate dehydrogenase (EC 1.2.1.12) (GAPDH) [MASS=35922]                                                                                                                                                                              | 0.33 | 8.68  | 0.84 | 0.00 | 1 | 2 | 2<br>3 | VPTANVSVVDLTC[330]R<br>VIPELNGKLTGM[147]AFR        | 1<br>1 |
| GABT_HUMAN (P80404) 4-aminobutyrate aminotransferase, mitochondrial precursor (EC 2.6.1.19) ((S)-3-amino-2-methylpropionate transaminase) (EC 2.6.1.22) (Gamma-amino-N-butyrate transaminase) (GABA transaminase) (GABA aminotransferase) (GABA-AT) (GABA-T) ( [MASS=56439] | 0.95 | 2.80  | 1.62 | 0.00 | 1 | 1 | 2      | GTFC[339]SFDTPPDDISIR                              | 1      |
| GBB1_HUMAN (P62873) Guanine nucleotide-binding protein G(I)/G(S)/G(T) subunit beta 1 (Transducin beta chain 1) [MASS=37246]                                                                                                                                                 | 1.00 | 3.83  | 0.55 | 0.09 | 5 | 1 | 2      | ELAGHTGYLSC[339]C[339]R<br>ELAGHTGYLSC[330]C[330]R | 2<br>3 |
| GBG3_HUMAN (P63215) Guanine nucleotide-binding protein G(I)/G(S)/G(O) gamma-3 subunit precursor [MASS=8305]                                                                                                                                                                 | 0.67 | 40.00 | 0.90 | 0.00 | 1 | 1 | 3      | AAADLM[147]TYC[330]DAHAC[330]EDPLITPVPTSENPFR      | 1      |
| GBP4_HUMAN (Q96PP9) Guanylate-binding protein 4 [MASS=73123]                                                                                                                                                                                                                | *    | 2.50  | *    | *    | * | 1 | 3      | ALTAGEKAIAAERAMK                                   | 1      |
| GBRT_HUMAN (Q9UN88) Gamma-aminobutyric-acid receptor theta subunit precursor (GABA(A) receptor) [MASS=72021]                                                                                                                                                                | *    | 2.85  | *    | *    | * | 2 | 1<br>2 | VIARYR<br>ILDRVLSRYDVR                             | 1<br>1 |
| GCF_HUMAN (P16383) GC-rich sequence DNA-binding factor (GCF) (Transcription factor 9) (TCF-9) [MASS=91001]                                                                                                                                                                  | *    | 1.15  | *    | *    | * | 1 | 1      | YVQDVKSSK                                          | 1      |

|                                                                                                                                                      |      |       |      |      |   |   |   |                                              |                             |    |
|------------------------------------------------------------------------------------------------------------------------------------------------------|------|-------|------|------|---|---|---|----------------------------------------------|-----------------------------|----|
| GCM2_HUMAN (O75603) Chorion-specific transcription factor GCMb (Glial cells missing homolog 2) (GCM motif protein 2) (hGCMb) [MASS=56609]            | *    | 3.56  | *    | *    | * | 1 | 2 | VSYQAYQPPAM[147]KYSDSVR                      | 1                           |    |
|                                                                                                                                                      |      |       |      |      |   |   |   | 2                                            | YVSAQPLAGR                  | 12 |
| GCP2_HUMAN (Q9BSJ2) Gamma-tubulin complex component 2 (GCP-2) (Spindle pole body protein Spc97 homolog) (hSpc97) (hGCP2) (h103p) [MASS=102533]       | *    | 3.77  | *    | *    | * | 2 | 3 | VFSKLMSVC[339]VM[147]FTNC[330]MQKFTQSM[147]K | 1                           |    |
|                                                                                                                                                      |      |       |      |      |   |   |   |                                              |                             |    |
| GCST_HUMAN (P48728) Aminomethyltransferase, mitochondrial precursor (EC 2.1.2.10) (Glycine cleavage system T protein) (GCVT) [MASS=43946]            | *    | 2.23  | *    | *    | * | 1 | 1 | AAMDFPGAK                                    | 1                           |    |
| GHC1_HUMAN (Q9H936) Mitochondrial glutamate carrier 1 (GC-1) (Glutamate/H(+)-symporter 1) (Solute carrier family 25 member 22) [MASS=34470]          | 1.00 | 11.46 | 1.22 | 0.02 | 2 | 2 | 2 | GVNEDTYSGILDC[339]AR                         | 1                           |    |
|                                                                                                                                                      |      |       |      |      |   |   |   | 2                                            | LINGGIAGLIGVTC[330]VFPIDLAK | 1  |
| GLPK3_HUMAN (Q14409) Glycerol kinase, testis specific 1 (EC 2.7.1.30) (ATP:glycerol 3-phosphotransferase) (Glycerokinase) (GK) [MASS=60569]          | 0.83 | 4.88  | 1.53 | 0.00 | 1 | 2 | 2 | C[339]VFSDHGLLTTVAYK                         | 1                           |    |
|                                                                                                                                                      |      |       |      |      |   |   |   | 3                                            | GIIC[330]GLTQFTNK           | 1  |
| GLRB_HUMAN (P48167) Glycine receptor beta chain precursor (Glycine receptor 58 kDa subunit) [MASS=56122]                                             | 0.00 | 4.43  | 1.66 | 0.00 | 1 | 1 | 3 | LSITLSC[339]PLDLTLFPMDTQRC[339]K             | 1                           |    |
| GLSK_HUMAN (O94925) Glutaminase kidney isoform, mitochondrial precursor (EC 3.5.1.2) (GLS) (L-glutamine amidohydrolase) (K-glutaminase) [MASS=73461] | 1.00 | 5.68  | 1.56 | 0.03 | 3 | 3 | 2 | C[339]VQSNIVLLTQAFR                          | 1                           |    |
|                                                                                                                                                      |      |       |      |      |   |   |   | 2                                            | C[330]VQSNIVLLTQAFR         | 1  |
|                                                                                                                                                      |      |       |      |      |   |   |   | 3                                            | M[147]M[147]RLRGSGM[147]LR  | 1  |
|                                                                                                                                                      |      |       |      |      |   |   |   | 2                                            | VPFC[339]LQSC[339]VKPLK     | 1  |

|                                                                                                                                                                                                         |      |      |      |      |   |   |   |                                   |   |
|---------------------------------------------------------------------------------------------------------------------------------------------------------------------------------------------------------|------|------|------|------|---|---|---|-----------------------------------|---|
| GNAI2_HUMAN (P04899) Guanine nucleotide-binding protein G(i), alpha-2 subunit (Adenylate cyclase-inhibiting G alpha protein) [MASS=40319]                                                               | *    | 5.37 | *    | *    | * | 1 | 3 | QMKEIHHEDGYSEEEEC[330]RQYR        | 1 |
| GNAO1_HUMAN (P09471) Guanine nucleotide-binding protein G(o) subunit alpha 1 [MASS=39919]                                                                                                               | *    | 2.27 | *    | *    | * | 1 | 1 | MVC[330]DVVSR                     | 1 |
| GNRP_HUMAN (Q13972) Guanine nucleotide-releasing protein (GNRP) (Ras-specific nucleotide exchange factor CDC25) (Ras-specific guanine nucleotide-releasing factor) [MASS=145382]                        | 0.00 | 2.98 | *    | *    | * | 2 | 3 | VIGFLEEVMHDPPELLTQER              | 1 |
|                                                                                                                                                                                                         |      |      |      |      |   |   | 3 | PSGLYLLEGC[330]VC[339]DRAPSPK     | 1 |
| GGOB1_HUMAN (Q14789) Golgin subfamily B member 1 (Giantin) (MacroGolgin) (372 kDa Golgi complex-associated protein) (GCP372) [MASS=376075]                                                              | *    | 0.68 | *    | *    | * | 2 | 3 | NGVHRKSDPEELR                     | 2 |
|                                                                                                                                                                                                         |      |      |      |      |   |   | 2 | KLQAALINR                         | 1 |
| GOPC_HUMAN (Q9HD26) Golgi-associated PDZ and coiled-coil motif-containing protein (PDZ protein interacting specifically with TC10) (PIST) (CFTR-associated ligand) (Fused in glioblastoma) [MASS=50520] | 0.00 | 6.93 | 2.97 | 0.00 | 1 | 2 | 2 | AKLSGSPVEELER                     | 1 |
|                                                                                                                                                                                                         |      |      |      |      |   |   | 3 | C[339]GGLHVGDAILAVNGVNLR          | 1 |
| GOR_HUMAN (Q8IX06) Exonuclease GOR (EC 3.1.-.-) (Antigen GOR) (RNA exonuclease 1 homolog-like) [MASS=35139]                                                                                             | 0.00 | 7.86 | 0.61 | 0.00 | 1 | 2 | 3 | C[339]VRDQLC[330]YYHWGR           | 1 |
|                                                                                                                                                                                                         |      |      |      |      |   |   | 3 | HRSVSPAALAC[330]P                 | 1 |
| GP124_HUMAN (Q96PE1) Probable G-protein coupled receptor 124 precursor (Tumor endothelial marker 5) [MASS=141961]                                                                                       | *    | 1.35 | *    | *    | * | 1 | 3 | YDDVTLM[147]GAEVASGGC[339]M[147]K | 1 |
| GP162_HUMAN (Q16538) Probable G-protein coupled receptor 162 (Gene-rich cluster gene A protein) [MASS=63930]                                                                                            | *    | 1.87 | *    | *    | * | 1 | 3 | MWMVRWPVNYR                       | 1 |
|                                                                                                                                                                                                         |      |      |      |      |   |   | 3 | QDVHSRGLC[339]S                   | 3 |
| GPVI_HUMAN (Q9HCN6) Platelet glycoprotein VI precursor [MASS=36923]                                                                                                                                     | *    | 2.95 | *    | *    | * | 1 |   |                                   |   |
| GPX1_HUMAN (P07203) Glutathione peroxidase 1 (EC 1.11.1.9) (GSHPx-1) (GPx-1) (Cellular glutathione peroxidase) [MASS=21899]                                                                             | 0.37 | 7.96 | 1.13 | 0.00 | 1 | 1 | 2 | C[339]EVNGAGAHPLFAFLR             | 1 |

|                                                                                                                                                                                                                                                               |      |      |      |      |   |   |        |                                                  |        |
|---------------------------------------------------------------------------------------------------------------------------------------------------------------------------------------------------------------------------------------------------------------|------|------|------|------|---|---|--------|--------------------------------------------------|--------|
| GRIK4_HUMAN (Q16099) Glutamate receptor, ionotropic kainate 4 precursor (Glutamate receptor KA-1) (KA1) (Excitatory amino acid receptor 1) (EAA1) [MASS=107229]                                                                                               | *    | 1.36 | *    | *    | * | 1 | 3      | GYGIGMPVGSVFR                                    | 2      |
| GRIPE_HUMAN (Q6GYQ0) GTPase-activating Rap/Ran-GAP domain-like 1 (GAP-related-interacting partner to E12) (GRIPE) (Tuberin-like protein 1) [MASS=229830]                                                                                                      | *    | 1.03 | *    | *    | * | 2 | 2<br>2 | IIVRDLSGK<br>LRSGNASTM[147]TRR                   | 1<br>1 |
| GRP75_HUMAN (P38646) Stress-70 protein, mitochondrial precursor (75 kDa glucose-regulated protein) (GRP 75) (Peptide-binding protein 74) (PBP74) (Mortalin) (MOT) [MASS=73680]                                                                                | *    | 5.15 | *    | *    | * | 2 | 3<br>1 | TIAPC[339]QKAM[147]QDAEVSKSDIGEVLVGGMTR<br>MEEFK | 1<br>1 |
| HBP1_HUMAN (O60381) HMG box-containing protein 1 (HMG box transcription factor 1) (High mobility group box transcription factor 1) [MASS=57645]                                                                                                               | *    | 3.11 | *    | *    | * | 1 | 2      | RASLSC[330]GGPGGQDFAR                            | 1      |
| HCFC1_HUMAN (P51610) Host cell factor (HCF) (HCF-1) (C1 factor) (VP16 accessory protein) (VCAF) (CFF) [Contains: HCF N-terminal chain 1; HCF N-terminal chain 2; HCF N-terminal chain 3; HCF N-terminal chain 4; HCF N-terminal chain 5; HCF N-terminal chain | 0.00 | 1.38 | *    | *    | * | 2 | 3<br>2 | M[147]ASAVSPANLPVLLQPRWK<br>PM[147]SSPEMK        | 1<br>2 |
| HCN4_HUMAN (Q9Y3Q4) Potassium/sodium hyperpolarization-activated cyclic nucleotide-gated channel 4 [MASS=129041]                                                                                                                                              | 0.00 | 1.91 | *    | *    | * | 1 | 3      | QEPPPSLVAGASGGASPVGFTPR                          | 1      |
| HDA10_HUMAN (Q969S8) Histone deacetylase 10 (HD10) [MASS=71444]                                                                                                                                                                                               | 0.00 | 3.59 | 1.11 | 0.00 | 1 | 1 | 3      | EELQALSGQFDAIYFHPSTFHC[339]AR                    | 1      |
| HD_HUMAN (P42858) Huntingtin (Huntington disease protein) (HD protein) [MASS=347857]                                                                                                                                                                          | *    | 0.35 | *    | *    | * | 1 | 3      | FHVGDWM[147]GTIR                                 | 1      |
| HEAT1_HUMAN (Q9H583) HEAT repeat-containing protein 1 (Protein BAP28) [MASS=242369]                                                                                                                                                                           | 0.00 | 1.07 | 0.66 | 0.00 | 1 | 1 | 3      | NSHC[330]AQTVSSVFKGISVNAEQVR                     | 1      |
| HEAT3_HUMAN (Q7Z4Q2) HEAT repeat-containing protein 3 [MASS=74582]                                                                                                                                                                                            | *    | 4.26 | *    | *    | * | 1 | 3      | SQAEIINALLKILSEVLGMDAGEM[147]VIQMK               | 1      |

|                                                                                                                                                                                                                                                                             |      |      |      |      |   |   |   |                                      |   |
|-----------------------------------------------------------------------------------------------------------------------------------------------------------------------------------------------------------------------------------------------------------------------------|------|------|------|------|---|---|---|--------------------------------------|---|
|                                                                                                                                                                                                                                                                             |      |      |      |      |   |   | 3 | GILEPHGGRSDMDR                       | 3 |
| HEPH_HUMAN (Q9BQS7) Hephaestin precursor (EC 1.-.-.-) [MASS=130448]                                                                                                                                                                                                         | 0.00 | 4.32 | 1.51 | 0.00 | 1 | 4 | 2 | QRYQAAR                              | 1 |
|                                                                                                                                                                                                                                                                             |      |      |      |      |   |   | 3 | SGPGPNDSAC[339]VSWIYYSAVDPIK         | 1 |
|                                                                                                                                                                                                                                                                             |      |      |      |      |   |   | 1 | IGGTYK                               | 1 |
| HEXB_HUMAN (P07686) Beta-hexosaminidase beta chain precursor (EC 3.2.1.52) (N-acetyl-beta-glucosaminidase) (Beta-N-acetylhexosaminidase) (Hexosaminidase B) (Cervical cancer proto-oncogene 7) (HCC-7) [Contains: Beta-hexosaminidase beta-B chain; Beta-hexos [MASS=63111] | 0.00 | 4.68 | 1.76 | 0.00 | 1 | 2 | 2 | AKLAPGTIVEVWK                        | 1 |
|                                                                                                                                                                                                                                                                             |      |      |      |      |   |   | 2 | C[339]WESNPKIQDFMR                   | 1 |
| HHAT_HUMAN (Q5VTY9) Protein-cysteine N-palmitoyltransferase HHAT (EC 2.3.1.-) (Hedgehog acyltransferase) (Skinny hedgehog protein 1) (Melanoma antigen recognized by T-cells 2) (MART-2) [MASS=57313]                                                                       | 0.00 | 2.23 | *    | *    | * | 1 | 3 | QM[147]QQQEHDLSK                     | 2 |
| HHCM_HUMAN (Q05877) Hepatocellular carcinoma protein HHCM (HHC(M)) [MASS=52150]                                                                                                                                                                                             | *    | 4.93 | *    | *    | * | 1 | 3 | EGGVKATGLFLSTSSHVMTPTEGR             | 1 |
| HINT2_HUMAN (Q9BX68) Histidine triad nucleotide-binding protein 2 (EC 3.-.-) (HINT-2) (HINT-3) (HIT-17kDa) (PKCI-1-related HIT protein) [MASS=17162]                                                                                                                        | *    | 7.98 | *    | *    | * | 1 | 3 | AVAATGVRGGQVR                        | 1 |
| HIP1R_HUMAN (O75146) Huntingtin-interacting protein 1-related protein (Hip1-related) (Hip 12) [MASS=119387]                                                                                                                                                                 | *    | 1.87 | *    | *    | * | 1 | 3 | YIAQLKSQVNALEGELEEQR                 | 1 |
| HNRLI_HUMAN (Q8WVV9) Heterogeneous nuclear ribonucleoprotein L-like (Stromal RNA-regulating factor) (BLOCK24 protein) [MASS=60083]                                                                                                                                          | 0.00 | 4.98 | 2.10 | 0.00 | 1 | 1 | 3 | FGTIC[339]YVMMMPFKRQALVEFENIDSAK     | 1 |
| HNRPK_HUMAN (P61978) Heterogeneous nuclear ribonucleoprotein K (hnRNP K) (Transformation up-regulated nuclear protein) (TUNP) [MASS=50976]                                                                                                                                  | *    | 2.16 | *    | *    | * | 1 | 2 | RGPPPPPPGR                           | 2 |
| HS105_HUMAN (Q92598) Heat-shock protein 105 kDa (Heat shock 110 kDa protein) (Antigen NY-CO-25) [MASS=96864]                                                                                                                                                                | 0.00 | 3.03 | 0.17 | 0.00 | 1 | 1 | 3 | KLM[147]SSNSTDLPLNIEC[330]FMNDKDVSGK | 1 |

|                                                                                                                                                      |      |       |      |      |    |   |   |                                        |   |
|------------------------------------------------------------------------------------------------------------------------------------------------------|------|-------|------|------|----|---|---|----------------------------------------|---|
| HS12B_HUMAN (Q96MM6) Heat shock 70 kDa protein 12B [MASS=75687]                                                                                      | *    | 1.75  | *    | *    | *  | 1 | 2 | QRGHNVETALRR                           | 1 |
| HS90A_HUMAN (P07900) Heat shock protein HSP 90-alpha (HSP 86) (NY-REN-38 antigen) [MASS=84528]                                                       | *    | 1.23  | *    | *    | *  | 1 | 2 | TDTGEPMGR                              | 1 |
| HSP71_HUMAN (P08107) Heat shock 70 kDa protein 1 (HSP70.1) (HSP70-1/HSP70-2) [MASS=70052]                                                            | *    | 1.87  | *    | *    | *  | 1 | 3 | KFGDPVVQSDM[147]JK                     | 1 |
| HV3T_HUMAN (P01781) Ig heavy chain V-III region GAL [MASS=12730]                                                                                     | 0.33 | 16.38 | 1.50 | 0.00 | 1  | 1 | 3 | LSC[330]AASGFBBBLGM[147]TWVR           | 1 |
| HXA13_HUMAN (P31271) Homeobox protein Hox-A13 (Hox-1J) [MASS=39753]                                                                                  | *    | 2.32  | *    | *    | *  | 1 | 2 | MGPPPNAIK                              | 1 |
|                                                                                                                                                      |      |       |      |      |    |   | 2 | AAQLC[339]GAGM[147]AAVVDK              | 1 |
|                                                                                                                                                      |      |       |      |      |    |   | 2 | C[330]NVSFLLSEDGSGK                    | 1 |
|                                                                                                                                                      |      |       |      |      |    |   | 2 | KLPVGFTFSFPC[339]QQSK                  | 1 |
|                                                                                                                                                      |      |       |      |      |    |   | 2 | ATDC[330]VGHDVVTLLR                    | 1 |
|                                                                                                                                                      |      |       |      |      |    |   | 2 | C[339]NVSFLLSEDGSGK                    | 2 |
| HXK1_HUMAN (P19367) Hexokinase-1 (EC 2.7.1.1) (Hexokinase type I) (HK I) (Brain form hexokinase) [MASS=102484]                                       | 1.00 | 14.83 | 1.69 | 0.06 | 15 | 8 | 2 | LPVGFTFSFPC[330]QQSK                   | 1 |
|                                                                                                                                                      |      |       |      |      |    |   | 3 | MIAAQLLAYFYFTELKDDQVK                  | 1 |
|                                                                                                                                                      |      |       |      |      |    |   | 2 | AILQQLGLNSTC[339]DDSILVK               | 1 |
|                                                                                                                                                      |      |       |      |      |    |   | 3 | LGVEPSDDDC[339]VSVQHVC[339]TIVSFR      | 1 |
|                                                                                                                                                      |      |       |      |      |    |   | 2 | ATDC[339]VGHDVVTLLR                    | 4 |
|                                                                                                                                                      |      |       |      |      |    |   | 2 | AAQLC[330]GAGMAAVVDK                   | 1 |
|                                                                                                                                                      |      |       |      |      |    |   | 2 | LPVGFTFSFPC[339]QQSK                   | 1 |
| I12R2_HUMAN (Q99665) Interleukin-12 receptor beta-2 chain precursor (IL-12 receptor beta-2) (IL-12R-beta2) [MASS=97135]                              | *    | 1.04  | *    | *    | *  | 1 | 2 | DEGLVLLNR                              | 1 |
| I2C1_HUMAN (Q9UL18) Eukaryotic translation initiation factor 2C 1 (eIF2C 1) (eIF-2C 1) (Argonaute-1) (Putative RNA-binding protein Q99) [MASS=97214] | 0.00 | 1.40  | 3.76 | 0.00 | 1  | 1 | 3 | TSPQTLNLC[339]LK                       | 1 |
| I2C3_HUMAN (Q9H9G7) Eukaryotic translation initiation factor 2C 3 (eIF2C 3) (eIF-2C 3) (Argonaute-3) [MASS=97360]                                    | 0.00 | 1.05  | *    | *    | *  | 1 | 1 | DRPFKVSİK                              | 1 |
| I5P1_HUMAN (Q14642) Type I inositol-1,4,5-trisphosphate 5-phosphatase (EC 3.1.3.56) (5PTase) [MASS=47819]                                            | 0.00 | 6.55  | 0.89 | 0.00 | 1  | 1 | 3 | EIYSDTLESTPM[147]LEKEKFPQDYFPEC[330]JK | 1 |

|                                                                                                                                                                                    |      |      |      |      |   |   |   |                                  |   |
|------------------------------------------------------------------------------------------------------------------------------------------------------------------------------------|------|------|------|------|---|---|---|----------------------------------|---|
| ICAM5_HUMAN (Q9UMF0) Intercellular adhesion molecule 5 precursor (ICAM-5) (Telencephalin) [MASS=97330]                                                                             | *    | 0.76 | *    | *    | * | 1 | 1 | NRSAELR                          | 1 |
| IDH3A_HUMAN (P50213) Isocitrate dehydrogenase [NAD] subunit alpha, mitochondrial precursor (EC 1.1.1.41) (Isocitric dehydrogenase) (NAD(+)-specific ICDH) [MASS=39591]             | 1.00 | 7.65 | 0.93 | 0.14 | 4 | 2 | 2 | TFDLYANVRPC[339]VSIEGYK          | 1 |
|                                                                                                                                                                                    |      |      |      |      |   |   | 2 | C[339]SDFTEEIC[339]R             | 2 |
|                                                                                                                                                                                    |      |      |      |      |   |   | 2 | C[330]SDFTEEIC[330]R             | 1 |
| IDH3G_HUMAN (P51553) Isocitrate dehydrogenase [NAD] subunit gamma, mitochondrial precursor (EC 1.1.1.41) (Isocitric dehydrogenase) (NAD(+)-specific ICDH) [MASS=42794]             | *    | 2.04 | *    | *    | * | 1 | 2 | KKVTAVHK                         | 1 |
| IDHP_HUMAN (P48735) Isocitrate dehydrogenase [NADP], mitochondrial precursor (EC 1.1.1.42) (Oxalosuccinate decarboxylase) (IDH) (NADP(+)-specific ICDH) (IDP) (ICD-M) [MASS=50909] | 1.00 | 9.07 | 1.58 | 0.00 | 2 | 3 | 2 | NILGGTVFREPIIC[339]K             | 1 |
|                                                                                                                                                                                    |      |      |      |      |   |   | 2 | VC[339]VETVESGAM[147]TK          | 1 |
|                                                                                                                                                                                    |      |      |      |      |   |   | 2 | DLAGC[339]IHGLSNVK               | 1 |
| IL1F8_HUMAN (Q9NZH7) Interleukin-1 family member 8 (IL-1F8) (Interleukin-1 eta) (IL-1 eta) (FIL1 eta) (Interleukin-1 homolog 2) (IL-1H2) [MASS=18521]                              | 0.00 | 7.32 | *    | *    | * | 1 | 3 | KWKSSFQHHHLR                     | 4 |
| IMMT_HUMAN (Q16891) Mitochondrial inner membrane protein (Mitofilin) (p87/89) (Proliferation-inducing gene 4 protein) [MASS=83677]                                                 | *    | 3.30 | *    | *    | * | 2 | 2 | SIQSGPLK                         | 1 |
|                                                                                                                                                                                    |      |      |      |      |   |   | 2 | PC[330]RRYSTSGSSGLTTGK           | 1 |
| INT10_HUMAN (Q9NVR2) Integrator complex subunit 10 (Int10) [MASS=82235]                                                                                                            | 0.00 | 2.11 | 1.95 | 0.00 | 1 | 1 | 3 | ILNVVGMRC[339]EWQMDK             | 1 |
| INVS_HUMAN (Q9Y283) Inversin (Inversion of embryo turning homolog) (Nephrocystin-2) [MASS=117826]                                                                                  | *    | 1.69 | *    | *    | * | 2 | 1 | HTPLFR                           | 1 |
|                                                                                                                                                                                    |      |      |      |      |   |   | 3 | YTPLDYALLGER                     | 1 |
| IP6K1_HUMAN (Q92551) Inositol hexaphosphate kinase 1 (EC 2.7.4.21) (InsP6 kinase 1) (Inositol hexakisphosphate kinase 1) [MASS=50235]                                              | 0.00 | 6.80 | *    | *    | * | 2 | 3 | VC[330]GM[147]QVYQLDTGHYLC[339]R | 1 |
|                                                                                                                                                                                    |      |      |      |      |   |   | 3 | M[147]IDFAHSTFKGFR               | 1 |
| IQGA2_HUMAN (Q13576) Ras GTPase-activating-like protein IQGAP2 [MASS=180480]                                                                                                       | *    | 1.72 | *    | *    | * | 2 | 3 | YDYYNTDSK                        | 1 |
|                                                                                                                                                                                    |      |      |      |      |   |   | 2 | LPYDVTEQALTYPEVK                 | 1 |



|                                                                                                                                                                                                                  |      |       |      |      |   |   |   |                                     |   |
|------------------------------------------------------------------------------------------------------------------------------------------------------------------------------------------------------------------|------|-------|------|------|---|---|---|-------------------------------------|---|
| IRAK3_HUMAN (Q9Y616) Interleukin-1 receptor-associated kinase 3 (EC 2.7.11.1) (IRAK-3) (IL-1 receptor-associated kinase M) (IRAK-M) [MASS=67752]                                                                 | 0.00 | 3.02  | *    | *    | * | 1 | 3 | VPPC[330]PRNFSAKLFC[339]LAGR        | 1 |
| IRS2_HUMAN (Q9Y4H2) Insulin receptor substrate 2 (IRS-2) [MASS=137333]                                                                                                                                           | 0.81 | 3.81  | 1.28 | 0.15 | 2 | 3 | 3 | C[339]SSC[339]RVR                   | 1 |
|                                                                                                                                                                                                                  |      |       |      |      |   |   | 3 | SHTLSGGC[330]GGRGSKVALLPAGGALQHSR   | 1 |
|                                                                                                                                                                                                                  |      |       |      |      |   |   | 2 | LNC[330]EQPSVTLQLM[147]NIR          | 1 |
| ISK5_HUMAN (Q9NQ38) Serine protease inhibitor Kazal-type 5 precursor (Lympho-epithelial Kazal-type-related inhibitor) (LEKTI) [Contains: Hemofiltrate peptide HF6478; Hemofiltrate peptide HF7665] [MASS=120758] | *    | 4.04  | *    | *    | * | 3 | 3 | C[330]AMC[339]ASVFKLEEEEEKK         | 1 |
|                                                                                                                                                                                                                  |      |       |      |      |   |   | 1 | REGETR                              | 1 |
|                                                                                                                                                                                                                  |      |       |      |      |   |   | 3 | MHGNC[330]SM[147]C[330]QAYFQAENEEKK | 1 |
|                                                                                                                                                                                                                  |      |       |      |      |   |   | 1 | AIVKSGGK                            | 6 |
| ISK6_HUMAN (Q6UWN8) Serine protease inhibitor Kazal-type 6 precursor [MASS=8585]                                                                                                                                 | *    | 10.00 | *    | *    | * | 1 |   |                                     |   |
| ITA2_HUMAN (P17301) Integrin alpha-2 precursor (Platelet membrane glycoprotein Ia) (GPIa) (Collagen receptor) (VLA-2 alpha chain) (CD49b antigen) [MASS=129295]                                                  | 0.00 | 0.51  | 9.25 | 0.00 | 1 | 1 | 2 | LC[339]FSAK                         | 1 |
| ITAD_HUMAN (Q13349) Integrin alpha-D precursor (Leukointegrin alpha D) (ADB2) (CD11d antigen) [MASS=126885]                                                                                                      | *    | 1.64  | *    | *    | * | 1 | 3 | DPLEYSDVIPQAEKAGIIR                 | 1 |
| ITLN2_HUMAN (Q8WWU7) Intelectin-2 precursor (Endothelial lectin HL-2) [MASS=36211]                                                                                                                               | 0.00 | 5.85  | 1.31 | 0.00 | 1 | 1 | 3 | C[339]WNDNGPAIPVVYDFGDAK            | 1 |
| IVD_HUMAN (P26440) Isovaleryl-CoA dehydrogenase, mitochondrial precursor (EC 1.3.99.10) (IVD) [MASS=46319]                                                                                                       | 0.00 | 2.36  | 2.38 | 0.00 | 1 | 1 | 2 | AC[339]DEGHC[339]TAK                | 1 |
| JAD1C_HUMAN (P41229) Jumonji/ARID domain-containing protein 1C (SmcX protein) (Xe169 protein) [MASS=175804]                                                                                                      | 0.00 | 1.03  | 0.93 | 0.00 | 1 | 1 | 2 | EELSHSPEPC[339]TKM[147]TMR          | 1 |

|                                                                                                                                                                                                                                                                              |      |      |       |      |   |   |                                             |                   |   |
|------------------------------------------------------------------------------------------------------------------------------------------------------------------------------------------------------------------------------------------------------------------------------|------|------|-------|------|---|---|---------------------------------------------|-------------------|---|
|                                                                                                                                                                                                                                                                              |      |      |       |      |   |   | 2                                           | NC[339]SVPR       | 5 |
| JAG2_HUMAN (Q9Y219) Jagged-2 precursor (Jagged2) (HJ2) [MASS=133365]                                                                                                                                                                                                         | 0.00 | 1.78 | 20.45 | 0.00 | 1 | 2 |                                             |                   |   |
|                                                                                                                                                                                                                                                                              |      |      |       |      |   |   | 2                                           | RADEALPGPAGHA AVR | 1 |
| JHD1B_HUMAN (Q8NHM5) JmjC domain-containing histone demethylation protein 1B (EC 1.14.11.-) (F-box/LRR-repeat protein 10) (F-box and leucine-rich repeat protein 10) (F-box protein FBL10) (Protein JEMMA) (Jumonji domain-containing EMSY-interactor methyltr [MASS=152614] | *    | 1.42 | *     | *    | * | 2 | 3 RPPGIC[330]ERPHR<br>2 SPPRVISR            | 1<br>1            |   |
| JHD2C_HUMAN (Q15652) Probable JmjC domain-containing histone demethylation protein 2C (EC 1.14.11.-) (Jumonji domain-containing protein 1C) (Thyroid receptor-interacting protein 8) (TRIP-8) [MASS=284523]                                                                  | *    | 1.18 | *     | *    | * | 2 | 2 KEGSYSSLSPPTLTPVM[147]PVNAGGK<br>1 RLSFSK | 1<br>1            |   |
| JPH2_HUMAN (Q9BR39) Junctophilin-2 (Junctophilin type 2) (JP-2) [MASS=74221]                                                                                                                                                                                                 | 0.00 | 3.02 | *     | *    | * | 2 | 1 QKAEIAASR<br>3 RAERTSVGSQR                | 1<br>1            |   |
|                                                                                                                                                                                                                                                                              |      |      |       |      |   |   | 1 PSELMPK<br>2 NLGMVC[339]R                 | 1<br>14           |   |
| K0196_HUMAN (Q12768) Protein KIAA0196 [MASS=134286]                                                                                                                                                                                                                          | 0.00 | 1.21 | 24.57 | 0.03 | 8 | 2 |                                             |                   |   |
|                                                                                                                                                                                                                                                                              |      |      |       |      |   |   | 3 LVLIGSNHSLPFLK                            | 4                 |   |
| K0310_HUMAN (O15027) Protein KIAA0310 [MASS=233516]                                                                                                                                                                                                                          | *    | 1.19 | *     | *    | * | 2 |                                             |                   |   |
|                                                                                                                                                                                                                                                                              |      |      |       |      |   |   | 3 NQSWREALVGDR                              | 1                 |   |

|                                                                                                                                                                                                           |      |      |      |      |   |   |   |                                                  |   |
|-----------------------------------------------------------------------------------------------------------------------------------------------------------------------------------------------------------|------|------|------|------|---|---|---|--------------------------------------------------|---|
| K0889_HUMAN (O94964) Protein KIAA0889 [MASS=55760]                                                                                                                                                        | 0.00 | 6.56 | 0.12 | 0.00 | 1 | 2 | 3 | SYTAPDKTGIRVYYSPVVAR                             | 1 |
|                                                                                                                                                                                                           |      |      |      |      |   |   | 2 | YGIVQEFFRNVVC[330]GR                             | 1 |
| K1024_HUMAN (Q9UPX6) UPF0258 protein KIAA1024 [MASS=102992]                                                                                                                                               | 0.00 | 4.04 | 1.13 | 0.00 | 1 | 2 | 2 | FDLSQLAK                                         | 1 |
|                                                                                                                                                                                                           |      |      |      |      |   |   | 3 | AKVC[339]KIAALIAAAAC[339]TVILVIVVIC[339]TM[147]K | 1 |
| K1045_HUMAN (Q9UPV7) Protein KIAA1045 [MASS=45191]                                                                                                                                                        | *    | 1.75 | *    | *    | * | 1 | 1 | MGVLM[147]SK                                     | 1 |
| K1219_HUMAN (Q86X10) Protein KIAA1219 [MASS=166797]                                                                                                                                                       | 0.00 | 1.27 | *    | *    | * | 2 | 2 | LESDSYSPPHVRR                                    | 1 |
|                                                                                                                                                                                                           |      |      |      |      |   |   | 1 | NVESSR                                           | 1 |
| K1267_HUMAN (Q7Z3B3) Protein KIAA1267 [MASS=120965]                                                                                                                                                       | *    | 1.27 | *    | *    | * | 1 | 2 | SQLMLTRKAEALR                                    | 1 |
| K6PP_HUMAN (Q01813) 6-phosphofructokinase type C (EC 2.7.1.11) (Phosphofructokinase 1) (Phosphohexokinase) (Phosphofructo-1-kinase isozyme C) (PFK-C) (6-phosphofructokinase, platelet type) [MASS=85596] | *    | 3.32 | *    | *    | * | 2 | 1 | TTIQR                                            | 1 |
|                                                                                                                                                                                                           |      |      |      |      |   |   | 3 | LPLMEC[339]VQM[147]TQDVQKAMDERR                  | 1 |
| KCC2B_HUMAN (Q13554) Calcium/calmodulin-dependent protein kinase type II beta chain (EC 2.7.11.17) (CaM-kinase II beta chain) (CaM kinase II subunit beta) (CaMK-II subunit beta) [MASS=72726]            | 1.00 | 3.77 | 0.82 | 0.00 | 1 | 1 | 3 | IC[330]DPGLTSFEPEALGNLVEGM[147]DFHR              | 1 |
|                                                                                                                                                                                                           |      |      |      |      |   |   | 2 | FC[339]TGLTQIETLFK                               | 3 |
| KCRB_HUMAN (P12277) Creatine kinase B-type (EC 2.7.3.2) (Creatine kinase B chain) (B-CK) [MASS=42644]                                                                                                     | 1.00 | 6.04 | 0.75 | 0.09 | 7 | 2 | 2 | FC[330]TGLTQIETLFK                               | 3 |
|                                                                                                                                                                                                           |      |      |      |      |   |   | 2 | GFC[330]LPPHC[330]SR                             | 1 |
| KCRS_HUMAN (P17540) Creatine kinase, sarcomeric mitochondrial precursor (EC 2.7.3.2) (S-MtCK) (Mib-CK) (Basic-type mitochondrial creatine kinase) [MASS=47520]                                            | 0.00 | 9.79 | 3.26 | 0.00 | 1 | 2 | 3 | LGYILTC[339]PSNLGTGLRAGVHVRIPK                   | 1 |
|                                                                                                                                                                                                           |      |      |      |      |   |   | 2 | LGYILTC[339]PSNLGTGLR                            | 1 |
| KCRU_HUMAN (P12532) Creatine kinase, ubiquitous mitochondrial precursor (EC 2.7.3.2) (U-MtCK) (Mia-CK) (Acidic-type mitochondrial creatine kinase) [MASS=47036]                                           | 0.99 | 5.04 | 1.14 | 0.00 | 1 | 1 | 2 | SEVELVQLVIDGVNYLIDC[339]ER                       | 1 |

|                                                                                                                                                                                                                     |      |      |      |      |   |   |   |                             |   |
|---------------------------------------------------------------------------------------------------------------------------------------------------------------------------------------------------------------------|------|------|------|------|---|---|---|-----------------------------|---|
| KEAP1_HUMAN (Q14145) Kelch-like ECH-associated protein 1 (Cytosolic inhibitor of Nrf2) (Kelch-like protein 19) [MASS=69665]                                                                                         | *    | 3.85 | *    | *    | * | 1 | 3 | YQDAPAAQFMAHKVVVLASSSPVFK   | 1 |
| KGUA_HUMAN (Q16774) Guanylate kinase (EC 2.7.4.8) (GMP kinase) [MASS=21594]                                                                                                                                         | 0.00 | 6.12 | 3.99 | 0.00 | 1 | 1 | 2 | IC[339]VLDVDLQGVR           | 1 |
| KI2S1_HUMAN (Q14954) Killer cell immunoglobulin-like receptor 2DS1 precursor (MHC class I NK cell receptor Eb6 Act1) (CD158h antigen) [MASS=33646]                                                                  | 0.00 | 6.91 | *    | *    | * | 1 | 3 | VNGTFQANFPLGPATHGGTYR       | 1 |
| KI67_HUMAN (P46013) Antigen KI-67 [MASS=358743]                                                                                                                                                                     | *    | 0.37 | *    | *    | * | 1 | 2 | SLVM[147]HTPPVLKK           | 1 |
| KIF1B_HUMAN (O60333) Kinesin-like protein KIF1B (Klp) [MASS=204431]                                                                                                                                                 | *    | 0.55 | *    | *    | * | 1 | 2 | AASTGAKGTR                  | 1 |
| KIF1C_HUMAN (O43896) Kinesin-like protein KIF1C [MASS=123071]                                                                                                                                                       | *    | 0.45 | *    | *    | * | 1 | 1 | GMLRK                       | 1 |
| KKCC2_HUMAN (Q96RR4) Calcium/calmodulin-dependent protein kinase kinase 2 (EC 2.7.11.17) (Calcium/calmodulin-dependent protein kinase kinase beta) (CaM-kinase kinase beta) (CaM-KK beta) (CaMKK beta) [MASS=64731] | *    | 2.38 | *    | *    | * | 2 | 1 | KIFSGK                      | 1 |
|                                                                                                                                                                                                                     |      |      |      |      |   |   | 2 | LDHPNVVK                    | 1 |
| KLH23_HUMAN (Q8NBE8) Kelch-like protein 23 [MASS=63923]                                                                                                                                                             | 0.00 | 7.71 | 0.22 | 0.00 | 1 | 2 | 3 | IEC[330]LYNLLSYINIDIPVYLK   | 1 |
|                                                                                                                                                                                                                     |      |      |      |      |   |   | 3 | LYLVGGQTTITEC[339]YDPEQNEWR | 1 |
| KLK13_HUMAN (Q9UKR3) Kallikrein-13 precursor (EC 3.4.21.-) (Kallikrein-like protein 4) (KLK-L4) [MASS=30570]                                                                                                        | 0.00 | 3.97 | 0.10 | 0.00 | 1 | 1 | 2 | ITDNM[147]LC[330]AGTK       | 1 |
| KNTC1_HUMAN (P50748) Kinetochore-associated protein 1 (Rough deal homolog) (hRod) (HsROD) (Rod) [MASS=250747]                                                                                                       | 0.00 | 0.32 | *    | *    | * | 1 | 1 | KLQGQIK                     | 1 |
| KPYM_HUMAN (P14618) Pyruvate kinase isozymes M1/M2 (EC 2.7.1.40) (Pyruvate kinase muscle isozyme) (Cytosolic thyroid hormone-binding protein) (CTHBP) (THBP1) [MASS=57805]                                          | 0.63 | 1.51 | 0.57 | 0.00 | 1 | 1 | 1 | GIFPVLC[330]K               | 1 |

|                                                                                                                                                                                                                                                      |   |      |      |   |   |   |   |                                     |                 |   |
|------------------------------------------------------------------------------------------------------------------------------------------------------------------------------------------------------------------------------------------------------|---|------|------|---|---|---|---|-------------------------------------|-----------------|---|
| KR106_HUMAN (P60371) Keratin-associated protein 10-6 (Keratin-associated protein 10.6) (High sulfur keratin-associated protein 10.6) (Keratin-associated protein 18-6) (Keratin-associated protein 18.6) [MASS=36782]                                | * | 4.93 | *    | * | * | 1 | 3 | M[147]AASTMSVC[339]SSDLSYGSR        | 1               |   |
| KRHB2_HUMAN (Q9NSB4) Keratin, type II cuticular Hb2 (Hair keratin, type II Hb2) [MASS=56683]                                                                                                                                                         |   | 0.00 | 2.92 | * | * | * | 1 | 3                                   | SSMTLGAGGSSPSHK | 1 |
| KS6A2_HUMAN (Q15349) Ribosomal protein S6 kinase alpha-2 (EC 2.7.11.1) (S6K-alpha 2) (90 kDa ribosomal protein S6 kinase 2) (p90-RSK 2) (Ribosomal S6 kinase 3) (RSK-3) (pp90RSK3) (MAP kinase-activated protein kinase 1c) (MAPKAPK1C) [MASS=83238] | * | 1.77 | *    | * | * | 1 | 3 | TMDYLHSQGVVHR                       | 1               |   |
| KSR2_HUMAN (Q6VAB6) Kinase suppressor of ras-2 (hKSR2) [MASS=93585]                                                                                                                                                                                  | * | 1.21 | *    | * | * | 1 | 2 | PNLSQIGM[147]GK                     | 1               |   |
| LAC_HUMAN (P01842) Ig lambda chain C regions [MASS=11236]                                                                                                                                                                                            | * | 6.67 | *    | * | * | 1 | 1 | ADSSPVK                             | 1               |   |
| LARP1_HUMAN (Q6PKG0) La-related protein 1 (La ribonucleoprotein domain family member 1) [MASS=123509]                                                                                                                                                | * | 1.82 | *    | * | * | 2 | 2 | FWAFLK                              | 1               |   |
|                                                                                                                                                                                                                                                      |   |      |      |   |   |   | 2 | LGIGQSQEMNTLFR                      | 1               |   |
| LATS1_HUMAN (O95835) Serine/threonine-protein kinase LATS1 (EC 2.7.11.1) (Large tumor suppressor homolog 1) (WARTS protein kinase) (h-warts) [MASS=126869]                                                                                           | * | 2.65 | *    | * | * | 1 | 3 | ASHSANSQPSATTVTAITPAPIQQPVKSM[147]R | 1               |   |
| LBC_HUMAN (Q12802) LBC oncogene (P47) (Lymphoid blast crisis oncogene) [MASS=49052]                                                                                                                                                                  | * | 1.42 | *    | * | * | 1 | 1 | SIMRM[147]JK                        | 1               |   |
| LBH2_HUMAN (P08910) Abhydrolase domain-containing protein 2 (Protein PHPS1-2) [MASS=48315]                                                                                                                                                           | * | 1.18 | *    | * | * | 1 | 1 | M[147]GRVR                          | 1               |   |
| LCMT2_HUMAN (O60294) Leucine carboxyl methyltransferase 2 (EC 2.1.1.-) (p21WAF1/CIP1 promoter-interacting protein) [MASS=75601]                                                                                                                      | * | 3.06 | *    | * | * | 3 | 1 | MGPRSRER                            | 1               |   |
|                                                                                                                                                                                                                                                      |   |      |      |   |   |   | 1 | APLIHR                              | 2               |   |
|                                                                                                                                                                                                                                                      |   |      |      |   |   |   | 1 | LYHTM[147]TR                        | 1               |   |
| LDH6A_HUMAN (Q6ZMR3) L-lactate dehydrogenase A-like 6A (EC 1.1.1.27) [MASS=36507]                                                                                                                                                                    | * | 3.01 | *    | * | * | 1 | 1 | DLNPDIGTDK                          | 1               |   |

|                                                                                                                                                                                                                                                        |      |       |      |      |   |   |   |                            |   |
|--------------------------------------------------------------------------------------------------------------------------------------------------------------------------------------------------------------------------------------------------------|------|-------|------|------|---|---|---|----------------------------|---|
| LDHA_HUMAN (P00338) L-lactate dehydrogenase A chain (EC 1.1.1.27) (LDH-A) (LDH muscle subunit) (LDH-M) (Proliferation-inducing gene 19 protein) (NY-REN-59 antigen) [MASS=36557]                                                                       | *    | 4.53  | *    | *    | * | 1 | 3 | DLADELALVDVIEDK            | 1 |
| LEG1_HUMAN (P09382) Galectin-1 (Lectin galactoside-binding soluble 1) (Beta-galactoside-binding lectin L-14-I) (Lactose-binding lectin 1) (S-Lac lectin 1) (Galaptin) (14 kDa lectin) (HPL) (HBL) (Putative MAPK-activating protein MP12) [MASS=14584] | 0.92 | 11.19 | 0.69 | 0.00 | 2 | 1 | 2 | FNAHGDANTIVC[330]NSK       | 2 |
|                                                                                                                                                                                                                                                        |      |       |      |      |   |   | 3 | TIIIKGYVPPTGK              | 8 |
| LEG4_HUMAN (P56470) Galectin-4 (Lactose-binding lectin 4) (L-36 lactose-binding protein) (L36LBP) (Antigen NY-CO-27) [MASS=35941]                                                                                                                      | 0.00 | 4.02  | *    | *    | * | 1 |   |                            |   |
| LETM1_HUMAN (O95202) Leucine zipper-EF-hand-containing transmembrane protein 1, mitochondrial precursor [MASS=83354]                                                                                                                                   | 1.00 | 2.84  | 1.33 | 0.00 | 1 | 1 | 3 | LFEDELTLDNLTRPQLVALC[339]K | 1 |
| LGI3_HUMAN (Q8N145) Leucine-rich repeat LGI family member 3 precursor (Leucine-rich glioma-inactivated protein 3) (LGI1-like protein 4) [MASS=61704]                                                                                                   | 0.00 | 2.37  | *    | *    | * | 1 | 3 | GSLALQPFLVGGR              | 1 |
| LGI4_HUMAN (Q8N135) Leucine-rich repeat LGI family member 4 precursor (Leucine-rich glioma-inactivated protein 4) (LGI1-like protein 3) [MASS=59141]                                                                                                   | 0.00 | 2.61  | 0.80 | 0.00 | 1 | 1 | 2 | HFQAGGDVFLC[330]LTR        | 1 |
| LHX3_HUMAN (Q9UBR4) LIM/homeobox protein Lhx3 [MASS=43358]                                                                                                                                                                                             | *    | 2.27  | *    | *    | * | 1 | 2 | SRGGSKSDK                  | 2 |
| LIPA3_HUMAN (O75145) Liprin-alpha-3 (Protein tyrosine phosphatase receptor type f polypeptide-interacting protein alpha-3) (PTPRF-interacting protein alpha-3) [MASS=133495]                                                                           | *    | 0.59  | *    | *    | * | 1 | 1 | ADGVSVR                    | 1 |

|                                                                                                                                                                                |      |      |      |      |   |   |                                                                      |                           |   |
|--------------------------------------------------------------------------------------------------------------------------------------------------------------------------------|------|------|------|------|---|---|----------------------------------------------------------------------|---------------------------|---|
| LOX15_HUMAN (P16050) Arachidonate 15-lipoxygenase (EC 1.13.11.33) (Arachidonate omega-6 lipoxygenase) (15-LOX) [MASS=74673]                                                    | 0.00 | 3.78 | *    | *    | * | 1 | 3                                                                    | WGNWKDGLILNMAGAKLYDLPVDER | 1 |
| LPPRC_HUMAN (P42704) 130 kDa leucine-rich protein (LRP 130) (GP130) (Leucine-rich PPR motif-containing protein) [MASS=145200]                                                  | 0.98 | 1.89 | 1.51 | 0.00 | 2 | 2 | 1 IPENIYR<br>2 C[339]GAIAEQTPILLFLLR<br>2 C[330]GAIAEQTPILLFLLR      | 1<br>1<br>1               |   |
| LRC47_HUMAN (Q8N1G4) Leucine-rich repeat-containing protein 47 [MASS=63472]                                                                                                    | 0.00 | 2.40 | *    | *    | * | 1 | 3 VLHVSENPVPLTVR                                                     | 1                         |   |
| LRC59_HUMAN (Q96AG4) Leucine-rich repeat-containing protein 59 [MASS=34930]                                                                                                    | *    | 3.26 | *    | *    | * | 1 | 2 PKKEANQAPK                                                         | 1                         |   |
| LRC8E_HUMAN (Q6NSJ5) Leucine-rich repeat-containing protein 8E [MASS=90277]                                                                                                    | *    | 5.53 | *    | *    | * | 2 | 2 EKVLAEPEKVVTEPPVVTLLDK<br>2 GPAATERAAATIVAMAGTGPGK                 | 1<br>1                    |   |
| LRP16_HUMAN (Q9BQ69) Protein LRP16 [MASS=35505]                                                                                                                                | *    | 5.54 | *    | *    | * | 2 | 1 DFVRLK<br>2 AKITGGYRLPAK                                           | 1<br>1                    |   |
| LRP1B_HUMAN (Q9NZR2) Low-density lipoprotein receptor-related protein 1B precursor (Low-density lipoprotein receptor-related protein-deleted in tumor) (LRP-DIT) [MASS=515496] | 0.00 | 0.91 | *    | *    | * | 3 | 3 LYWTDGNTINM[147]ANM[147]DGSNSKILFQNQK<br>2 PNGSRINR<br>1 SDHISTR   | 1<br>1<br>1               |   |
| LRP2_HUMAN (P98164) Low-density lipoprotein receptor-related protein 2 precursor (Megalin) (Glycoprotein 330) (gp330) [MASS=521928]                                            | *    | 0.15 | *    | *    | * | 1 | 2 PKPPSRR                                                            | 1                         |   |
| LRRC7_HUMAN (Q96NW7) Leucine-rich repeat-containing protein 7 (Protein LAP1) (Densin-180) [MASS=172580]                                                                        | 0.00 | 3.32 | *    | *    | * | 2 | 3 MLGPEHGM[147]SSM[147]SRSQSVPMDDDEMLTYGSSK<br>3 KAGSHIQTLMGSQLQHRSR | 1<br>1                    |   |
| LRRN3_HUMAN (Q9H3W5) Leucine-rich repeats neuronal protein 3 precursor (Neuronal leucine-rich repeat protein 3) (NLRR-3) [MASS=79424]                                          | 0.00 | 3.95 | 1.88 | 0.00 | 1 | 2 | 1 STSLKVK<br>3 FMEPDSLFC[339]VDPPEFQQQNV                             | 2<br>1                    |   |
| LSAMP_HUMAN (Q13449) Limbic system-associated membrane protein precursor (LSAMP) [MASS=37308]                                                                                  | *    | 2.07 | *    | *    | * | 1 | 1 HLTPTGR                                                            | 1                         |   |
| LTBP3_HUMAN (Q9NS15) Latent-transforming growth factor beta-binding protein 3 precursor (LTBP-3) [MASS=139246]                                                                 | 0.00 | 1.00 | 0.22 | 0.00 | 1 | 1 | 3 QPC[330]GSNPLPGLTK                                                 | 2                         |   |

|                                                                                                                                                                                   |      |      |      |      |   |   |   |                                   |   |
|-----------------------------------------------------------------------------------------------------------------------------------------------------------------------------------|------|------|------|------|---|---|---|-----------------------------------|---|
| LTK_HUMAN (P29376) Leukocyte tyrosine kinase receptor precursor (EC 2.7.10.1) (Protein tyrosine kinase 1) [MASS=91653]                                                            | 0.00 | 2.66 | 0.56 | 0.00 | 1 | 1 | 3 | TLPELC[330]SPQDELDFLM[147]EALIISK | 1 |
| LYAR_HUMAN (Q9NX58) Cell growth-regulating nucleolar protein [MASS=43614]                                                                                                         | 0.00 | 2.90 | 2.08 | 0.00 | 1 | 1 | 3 | IQVEKHVSVC[339]R                  | 1 |
| LYST_HUMAN (Q99698) Lysosomal-trafficking regulator (Beige homolog) [MASS=429136]                                                                                                 | 0.00 | 1.71 | 2.14 | 0.00 | 1 | 4 | 3 | SVIIPLLHAFK                       | 1 |
|                                                                                                                                                                                   |      |      |      |      |   |   | 2 | WIYMLSSVFQKQFYR                   | 1 |
|                                                                                                                                                                                   |      |      |      |      |   |   | 2 | TVLHLLSVDVSTAEM[147]M[147]PENLR   | 1 |
|                                                                                                                                                                                   |      |      |      |      |   |   | 3 | AQVVHHFLLTC[339]QVLQEYK           | 1 |
| M3K14_HUMAN (Q99558) Mitogen-activated protein kinase kinase kinase 14 (EC 2.7.11.25) (NF-kappa beta-inducing kinase) (Serine/threonine-protein kinase NIK) (HsNIK) [MASS=104041] | *    | 0.95 | *    | *    | * | 1 | 1 | VSAAELGGK                         | 1 |
| MACF4_HUMAN (Q96PK2) Microtubule-actin crosslinking factor 1, isoform 4 [MASS=670146]                                                                                             | *    | 0.64 | *    | *    | * | 2 | 2 | VLEAQANTGGIIDTATGKR               | 1 |
|                                                                                                                                                                                   |      |      |      |      |   |   | 2 | LRESPGSEQTPFMTAPEGK               | 1 |
| MAON_HUMAN (Q16798) NADP-dependent malic enzyme, mitochondrial precursor (EC 1.1.1.40) (NADP-ME) (Malic enzyme 3) [MASS=67054]                                                    | 0.95 | 3.15 | 1.33 | 0.00 | 2 | 1 | 2 | FGINC[339]LIQFEDFANANAFR          | 2 |
| MAP1A_HUMAN (P78559) Microtubule-associated protein 1A (MAP 1A) (Proliferation-related protein p80) [Contains: MAP1 light chain LC2] [MASS=306529]                                | *    | 1.18 | *    | *    | * | 3 | 3 | DSKEMQFLMQK                       | 1 |
|                                                                                                                                                                                   |      |      |      |      |   |   | 2 | ALEQKDTALEQK                      | 1 |
|                                                                                                                                                                                   |      |      |      |      |   |   | 2 | AVLDALLEGK                        | 1 |
| MARCO_HUMAN (Q9UEW3) Macrophage receptor MARCO (Macrophage receptor with collagenous structure) (Scavenger receptor class A member 2) [MASS=52658]                                | 0.00 | 9.81 | *    | *    | * | 2 | 3 | DGATGPSGPQPPGVKGEAGLQGPQGAPGK     | 1 |
|                                                                                                                                                                                   |      |      |      |      |   |   | 2 | GAM[147]GM[147]PGAPGPPGPPAEKGAK   | 1 |
| MAST1_HUMAN (Q9Y2H9) Microtubule-associated serine/threonine-protein kinase 1 (EC 2.7.11.1) (Syntrophin-associated serine/threonine-protein kinase) [MASS=170676]                 | *    | 3.57 | *    | *    | * | 4 | 2 | PSTLHGLSPKLHR                     | 1 |
|                                                                                                                                                                                   |      |      |      |      |   |   | 3 | LISNGAYGAVYLVRRHRDTR              | 1 |
|                                                                                                                                                                                   |      |      |      |      |   |   | 2 | GLQEPAPLAPSVPEAPRGR               | 1 |
|                                                                                                                                                                                   |      |      |      |      |   |   | 1 | HRDTR                             | 1 |
| MAST2_HUMAN (Q6P0Q8) Microtubule-associated serine/threonine-protein kinase 2 (EC 2.7.11.1) [MASS=196434]                                                                         | *    | 0.33 | *    | *    | * | 1 | 1 | MARRSK                            | 2 |



|                                                                                                                                                                                                                                                                              |      |       |      |      |   |   |        |                                                         |        |
|------------------------------------------------------------------------------------------------------------------------------------------------------------------------------------------------------------------------------------------------------------------------------|------|-------|------|------|---|---|--------|---------------------------------------------------------|--------|
| MAST3_HUMAN (O60307) Microtubule-associated serine/threonine-protein kinase 3 (EC 2.7.11.1) [MASS=143136]                                                                                                                                                                    | *    | 0.53  | *    | *    | * | 1 | 2      | SEVDYGR                                                 | 1      |
| MATR3_HUMAN (P43243) Matrin-3 [MASS=94623]                                                                                                                                                                                                                                   | *    | 2.01  | *    | *    | * | 2 | 1<br>1 | KDGSASAAK<br>SYSPDGK                                    | 1<br>1 |
| MBD1_HUMAN (Q9UIS9) Methyl-CpG-binding domain protein 1 (Methyl-CpG-binding protein MBD1) (Protein containing methyl-CpG-binding domain 1) [MASS=66607]                                                                                                                      | *    | 1.82  | *    | *    | * | 1 | 3      | RQVGPQSSEVR                                             | 1      |
| MCCC2_HUMAN (Q9HCC0) Methylcrotonoyl-CoA carboxylase beta chain, mitochondrial precursor (EC 6.4.1.4) (3-Methylcrotonyl-CoA carboxylase 2) (MCCase subunit beta) (3-methylcrotonyl-CoA:carbon dioxide ligase subunit beta) (3-Methylcrotonyl-CoA carboxylase n) [MASS=61333] | *    | 3.91  | *    | *    | * | 2 | 3<br>2 | KQLRAQEIAMQNR<br>AQEIAMQNR                              | 1<br>1 |
| MCLN2_HUMAN (Q8IZK6) Mucolipin-2 [MASS=62684]                                                                                                                                                                                                                                | 0.00 | 2.04  | 0.07 | 0.00 | 1 | 1 | 3      | IGLKVC[330]KQHVK                                        | 3      |
| MCLN3_HUMAN (Q8TDD5) Mucolipin-3 [MASS=64247]                                                                                                                                                                                                                                | 0.30 | 2.17  | 0.76 | 0.00 | 1 | 1 | 2      | KLKFFFMNPC[330]EK                                       | 1      |
| MCM5_HUMAN (P33992) DNA replication licensing factor MCM5 (CDC46 homolog) (P1-CDC46) [MASS=82285]                                                                                                                                                                            | *    | 0.82  | *    | *    | * | 1 | 1      | TGFTFK                                                  | 1      |
| MDC1_HUMAN (Q14676) Mediator of DNA damage checkpoint protein 1 (Nuclear factor with BRCT domains 1) [MASS=226665]                                                                                                                                                           | 0.00 | 0.86  | 3.33 | 0.00 | 1 | 1 | 3      | EC[330]DPAELEEKVPKVILER                                 | 1      |
| MDHC_HUMAN (P40925) Malate dehydrogenase, cytoplasmic (EC 1.1.1.37) (Cytosolic malate dehydrogenase) [MASS=36295]                                                                                                                                                            | 0.85 | 14.41 | 0.91 | 0.00 | 1 | 2 | 3<br>2 | LGVTANDVKNVWGNHSSTQYDPVNHAKVK<br>VIVVGNPANTNC[330]LTASK | 1<br>1 |

|                                                                                                                                                                                   |      |       |      |      |    |   |  |   |                                      |   |
|-----------------------------------------------------------------------------------------------------------------------------------------------------------------------------------|------|-------|------|------|----|---|--|---|--------------------------------------|---|
|                                                                                                                                                                                   |      |       |      |      |    |   |  | 1 | TIPLISQC[339]TPK                     | 1 |
|                                                                                                                                                                                   |      |       |      |      |    |   |  | 2 | TIPLISQC[339]TPK                     | 1 |
|                                                                                                                                                                                   |      |       |      |      |    |   |  | 2 | SQETEC[339]TYFSTPLLLGK               | 2 |
| MDHM_HUMAN (P40926) Malate dehydrogenase, mitochondrial precursor (EC 1.1.1.37) [MASS=35531]                                                                                      | 1.00 | 31.66 | 1.94 | 0.06 | 10 | 7 |  | 2 | GYLGPEQLPDC[339]LK                   | 1 |
|                                                                                                                                                                                   |      |       |      |      |    |   |  | 2 | SQETEC[339]TYFSTPLLLGKK              | 1 |
|                                                                                                                                                                                   |      |       |      |      |    |   |  | 1 | PVSAALRR                             | 1 |
|                                                                                                                                                                                   |      |       |      |      |    |   |  | 2 | SQETEC[330]TYFSTPLLLGK               | 2 |
|                                                                                                                                                                                   |      |       |      |      |    |   |  | 2 | GC[339]DVVVIPAGVPR                   | 1 |
|                                                                                                                                                                                   |      |       |      |      |    |   |  | 3 | GYLGPEQLPDC[330]LKGC[330]DVVVIPAGVPR | 1 |
| MDN1_HUMAN (Q9NU22) Midasin (MIDAS-containing protein) [MASS=632816]                                                                                                              | 0.33 | 1.16  | 0.95 | 0.00 | 1  | 5 |  | 3 | EFVKISKWNDVSFWSIK                    | 1 |
|                                                                                                                                                                                   |      |       |      |      |    |   |  | 3 | AC[330]PTREQLLM[147]NALLYLR          | 1 |
|                                                                                                                                                                                   |      |       |      |      |    |   |  | 2 | KELSPALR                             | 1 |
|                                                                                                                                                                                   |      |       |      |      |    |   |  | 2 | VM[147]LDLQSYR                       | 2 |
|                                                                                                                                                                                   |      |       |      |      |    |   |  | 2 | LLTEISSWDGC[330]QK                   | 1 |
| MDR1_HUMAN (P08183) Multidrug resistance protein 1 (EC 3.6.3.44) (P-glycoprotein 1) (CD243 antigen) [MASS=141461]                                                                 | 0.00 | 2.11  | *    | *    | *  | 1 |  | 3 | ILLLDEATSALDTESEAVVQVALDKAR          | 1 |
| MERL_HUMAN (P35240) Merlin (Moesin-ezrin-radixin-like protein) (Neurofibromin-2) (Schwannomin) (Schwannomerlin) [MASS=69690]                                                      | *    | 2.69  | *    | *    | *  | 1 |  | 2 | ISFPWNEIRNISYSK                      | 1 |
| MFA3L_HUMAN (O75121) Microfibrillar-associated protein 3-like precursor (Protein kinase NYD-SP9) [MASS=45379]                                                                     | 0.00 | 2.44  | 1.32 | 0.00 | 1  | 1 |  | 2 | LC[339]M[147]M[147]SSHLKK            | 1 |
| MGA_HUMAN (O43451) Maltase-glucoamylase, intestinal [Includes: Maltase (EC 3.2.1.20) (Alpha-glucosidase); Glucoamylase (EC 3.2.1.3) (Glucan 1,4-alpha-glucosidase)] [MASS=209721] | 0.00 | 1.45  | 0.29 | 0.00 | 1  | 1 |  | 3 | SLKFDGMWIDMNEPSSFVNGAVSPGC[330]R     | 1 |
| MGST3_HUMAN (O14880) Microsomal glutathione S-transferase 3 (EC 2.5.1.18) (Microsomal GST-3) (Microsomal GST-III) [MASS=16516]                                                    | 1.00 | 15.79 | 1.75 | 0.03 | 4  | 1 |  | 3 | YKVEYPIM[147]YSTDPENGHIFNC[339]IQR   | 4 |

|                                                                                                                                                                                                                                                                               |      |       |      |      |   |   |   |   |                                    |   |
|-------------------------------------------------------------------------------------------------------------------------------------------------------------------------------------------------------------------------------------------------------------------------------|------|-------|------|------|---|---|---|---|------------------------------------|---|
|                                                                                                                                                                                                                                                                               |      |       |      |      |   |   |   | 1 | SLIVPLK                            | 9 |
| MKKS_HUMAN (Q9NPJ1) McKusick-Kaufman/Bardet-Biedl syndromes putative chaperonin (Bardet-Biedl syndrome 6 protein) [MASS=62341]                                                                                                                                                | *    | 1.23  | *    | *    | * |   | 1 |   |                                    |   |
|                                                                                                                                                                                                                                                                               |      |       |      |      |   |   |   | 3 | SC[339]SPKMRLDDFWSLK               | 1 |
|                                                                                                                                                                                                                                                                               |      |       |      |      |   |   |   | 1 | YLDSSVR                            | 1 |
| MKLN1_HUMAN (Q9UL63) Muskelin [MASS=84767]                                                                                                                                                                                                                                    | 0.25 | 4.49  | 0.09 | 3.94 | 2 | 3 |   | 3 | LC[330]RPSKDYLRL                   | 3 |
| MOG_HUMAN (Q16653) Myelin-oligodendrocyte glycoprotein precursor [MASS=28179]                                                                                                                                                                                                 | 0.79 | 4.86  | 0.94 | 0.00 | 1 | 1 | 2 |   | FSDEGGFTC[339]FFR                  | 1 |
| MORC2_HUMAN (Q9Y6X9) MORC family CW-type zinc finger 2 (Zinc finger CW-type coiled-coil domain protein 1) [MASS=110724]                                                                                                                                                       | *    | 0.93  | *    | *    | * |   | 1 | 1 | YTSSRFKTR                          | 1 |
| MPRI_HUMAN (P11717) Cation-independent mannose-6-phosphate receptor precursor (CI Man-6-P receptor) (CI-MPR) (M6PR) (Insulin-like growth factor 2 receptor) (Insulin-like growth factor II receptor) (IGF-II receptor) (M6P/IGF2 receptor) (M6P/IGF2R) (300 kD) [MASS=274274] | *    | 0.60  | *    | *    | * |   | 2 | 1 | SGLSYK                             | 1 |
|                                                                                                                                                                                                                                                                               |      |       |      |      |   |   |   | 1 | GKSSSAQKQ                          | 3 |
| MRCKG_HUMAN (Q6DT37) Serine/threonine-protein kinase MRCK gamma (EC 2.7.11.1) (CDC42-binding protein kinase gamma) (Myotonic dystrophy kinase-related CDC42-binding kinase gamma) (Myotonic dystrophy protein kinase-like alpha) (MRCK gamma) (DMPK-like gamma) [MASS=172517] | *    | 0.52  | *    | *    | * |   | 1 | 2 | QQRREM[147]LK                      | 1 |
| MSRA_HUMAN (Q9UJ68) Peptide methionine sulfoxide reductase (EC 1.8.4.6) (Protein-methionine-S-oxide reductase) (PMSR) (Peptide Met(O) reductase) [MASS=26132]                                                                                                                 | 0.00 | 10.21 | 0.78 | 0.00 | 1 | 1 | 3 |   | TVEPFPEGTQM[147]AVFGMGC[330]FWGAER | 1 |

|                                                                                                                                                                                                                               |      |      |       |      |   |   |   |                           |   |
|-------------------------------------------------------------------------------------------------------------------------------------------------------------------------------------------------------------------------------|------|------|-------|------|---|---|---|---------------------------|---|
| MTA3_HUMAN (Q9BTC8) Metastasis-associated protein MTA3 [MASS=67503]                                                                                                                                                           | 0.00 | 1.85 | 0.05  | 0.00 | 1 | 1 | 2 | LC[330]AIC[330]WLYWKK     | 1 |
| MTMR3_HUMAN (Q13615) Myotubularin-related protein 3 (EC 3.1.3.48) (FYVE domain-containing dual specificity protein phosphatase 1) (FYVE-DSP1) (Zinc finger FYVE domain-containing protein 10) [MASS=133618]                   | *    | 1.92 | *     | *    | * | 1 | 2 | RKTPEASAIGLHQDPELGDAALR   | 1 |
| MUTYH_HUMAN (Q9UIF7) A/G-specific adenine DNA glycosylase (EC 3.2.2.-) (MutY homolog) (hMYH) [MASS=60069]                                                                                                                     | *    | 1.65 | *     | *    | * | 1 | 1 | DVAEVTAFR                 | 1 |
| MY18B_HUMAN (Q8IUG5) Myosin-18B (Myosin XVIIIb) [MASS=285183]                                                                                                                                                                 | 0.00 | 1.01 | *     | *    | * | 2 | 3 | TRTGGLGDPGQGTVALKK        | 1 |
| MYBB_HUMAN (P10244) Myb-related protein B (B-Myb) [MASS=78764]                                                                                                                                                                | *    | 1.14 | *     | *    | * | 1 | 2 | LMMSTLPK                  | 1 |
|                                                                                                                                                                                                                               |      |      |       |      |   |   | 3 | GESHWWM[147]KGSTPTQISEIIK | 1 |
|                                                                                                                                                                                                                               |      |      |       |      |   |   | 3 | SPVRC[339]IATTR           | 8 |
| MYCB2_HUMAN (O75592) Probable ubiquitin ligase protein MYCBP2 (EC 6.3.2.-) (Myc-binding protein 2) (Protein associated with Myc) (Pam/highwire/rpm-1 protein) [MASS=510165]                                                   | 0.00 | 1.25 | 17.06 | 0.00 | 2 | 5 |   |                           |   |
|                                                                                                                                                                                                                               |      |      |       |      |   |   | 1 | SSFLFK                    | 1 |
|                                                                                                                                                                                                                               |      |      |       |      |   |   | 3 | LDKVVPLKENVK              | 1 |
|                                                                                                                                                                                                                               |      |      |       |      |   |   | 2 | EISLAAASK                 | 1 |
| MYH10_HUMAN (P35580) Myosin-10 (Myosin heavy chain, nonmuscle IIb) (Nonmuscle myosin heavy chain IIb) (NMMHC II-b) (NMMHC-IIb) (Cellular myosin heavy chain, type B) (Nonmuscle myosin heavy chain-B) (NMMHC-B) [MASS=228937] | *    | 3.95 | *     | *    | * | 7 | 1 | KGMFR                     | 1 |
|                                                                                                                                                                                                                               |      |      |       |      |   |   | 2 | VLQQVKAESEHK              | 1 |
|                                                                                                                                                                                                                               |      |      |       |      |   |   | 2 | AKLQELEGA VKSK            | 1 |
|                                                                                                                                                                                                                               |      |      |       |      |   |   | 2 | LKSLEAEILQEQEELASSERAR    | 1 |
|                                                                                                                                                                                                                               |      |      |       |      |   |   | 2 | DEIFAQSKSEK               | 1 |
|                                                                                                                                                                                                                               |      |      |       |      |   |   | 1 | ANARMK                    | 1 |
|                                                                                                                                                                                                                               |      |      |       |      |   |   | 1 | AAANKLVR                  | 1 |
| MYH4_HUMAN (Q9Y623) Myosin-4 (Myosin heavy chain, skeletal muscle, fetal) (Myosin heavy chain IIb) (MyHC-IIb) [MASS=223012]                                                                                                   | 0.00 | 1.70 | *     | *    | * | 2 | 3 | LGEAEQLALKGGKK            | 1 |
|                                                                                                                                                                                                                               |      |      |       |      |   |   | 2 | RNHLRVVESHM[147]QSTLDAEIR | 1 |

|                                                                                                                                                               |      |       |      |      |   |   |   |                             |   |
|---------------------------------------------------------------------------------------------------------------------------------------------------------------|------|-------|------|------|---|---|---|-----------------------------|---|
| MYL4_HUMAN (P12829) Myosin light polypeptide 4 (Myosin light chain 1, embryonic muscle/atrial isoform) (Myosin light chain alkali, GT-1 isoform) [MASS=21433] | 0.00 | 22.96 | *    | *    | * | 2 | 3 | MLDFETFLPILQHISRNK          | 1 |
|                                                                                                                                                               |      |       |      |      |   |   | 3 | IDFTADQIEEFKEAFSLFDRTPTGEMK | 1 |
| MYLK2_HUMAN (Q9H1R3) Myosin light chain kinase 2, skeletal/cardiac muscle (EC 2.7.11.18) (MLCK2) [MASS=64553]                                                 | 0.00 | 3.87  | 2.83 | 0.00 | 1 | 1 | 3 | DQRARMNAAQC[339]LAHPWLNLAEK | 1 |
|                                                                                                                                                               |      |       |      |      |   |   | 2 | DGGKVFMK                    | 1 |
| MYO15_HUMAN (Q9UKN7) Myosin-15 (Myosin XV) (Unconventional myosin-15) [MASS=395172]                                                                           | *    | 0.57  | *    | *    | * | 3 | 1 | AM[147]LAGR                 | 3 |
|                                                                                                                                                               |      |       |      |      |   |   | 1 | APLEHR                      | 1 |
| MYO1C_HUMAN (O00159) Myosin Ic (Myosin I beta) (MMI-beta) (MMIb) [MASS=118038]                                                                                | *    | 1.17  | *    | *    | * | 1 | 2 | TLFATEDALEVR                | 1 |
| MYO7A_HUMAN (Q13402) Myosin-7A (Myosin VIIa) [MASS=254404]                                                                                                    | *    | 0.54  | *    | *    | * | 1 | 3 | FGKYIDIHFNKR                | 2 |
| MYOM2_HUMAN (P54296) Myomesin-2 (M-protein) (165 kDa titin-associated protein) (165 kDa connectin-associated protein) [MASS=164793]                           | 0.00 | 2.12  | *    | *    | * | 3 | 2 | KDHGEYK                     | 1 |
|                                                                                                                                                               |      |       |      |      |   |   | 3 | IESNYGVHTLEINR              | 1 |
|                                                                                                                                                               |      |       |      |      |   |   | 1 | YAVFDLM[147]EGK             | 1 |
| MYPC2_HUMAN (Q14324) Myosin-binding protein C, fast-type (Fast MyBP-C) (C-protein, skeletal muscle fast-isoform) [MASS=128142]                                | *    | 2.80  | *    | *    | * | 3 | 3 | DDDDLGPPEIWELLKGAKK         | 1 |
|                                                                                                                                                               |      |       |      |      |   |   | 1 | ELPDK                       | 1 |
|                                                                                                                                                               |      |       |      |      |   |   | 1 | SAAFTHK                     | 1 |
| MYPC3_HUMAN (Q14896) Myosin-binding protein C, cardiac-type (Cardiac MyBP-C) (C-protein, cardiac muscle isoform) [MASS=140761]                                | *    | 0.86  | *    | *    | * | 1 | 2 | KLLC[330]ETEGRVR            | 1 |
|                                                                                                                                                               |      |       |      |      |   |   | 2 | VC[330]GSNLLSIC[330]K       | 2 |
| MYPR_HUMAN (P60201) Myelin proteolipid protein (PLP) (Lipophilin) [MASS=29946]                                                                                | 1.00 | 8.70  | 1.77 | 0.04 | 8 | 2 | 2 | VC[339]GSNLLSIC[339]K       | 1 |
|                                                                                                                                                               |      |       |      |      |   |   | 1 | TSASIGSLC[339]ADAR          | 1 |
|                                                                                                                                                               |      |       |      |      |   |   | 2 | TSASIGSLC[330]ADAR          | 1 |
|                                                                                                                                                               |      |       |      |      |   |   | 2 | TSASIGSLC[339]ADAR          | 3 |

|                                                                                                                                                                                                                                                                              |      |      |      |      |   |   |   |                                         |   |
|------------------------------------------------------------------------------------------------------------------------------------------------------------------------------------------------------------------------------------------------------------------------------|------|------|------|------|---|---|---|-----------------------------------------|---|
| MYST3_HUMAN (Q92794) Histone acetyltransferase MYST3 (EC 2.3.1.48) (EC 2.3.1.-) (MYST protein 3) (MOZ, YBF2/SAS3, SAS2 and TIP60 protein 3) (Runt-related transcription factor-binding protein 2) (Monocytic leukemia zinc finger protein) (Zinc finger protei [MASS=225054] | *    | 0.35 | *    | *    | * | 1 | 1 | VRTGPGR                                 | 1 |
| N4BP3_HUMAN (O15049) NEDD4-binding protein 3 (N4BP3) [MASS=60441]                                                                                                                                                                                                            | *    | 2.57 | *    | *    | * | 1 | 3 | KELRAQQGLAPEPR                          | 1 |
| NAL12_HUMAN (P59046) NACHT, LRR and PYD-containing protein 12 (PYRIN-containing APAF1-like protein 7) (Monarch-1) (Regulated by nitric oxide) [MASS=120172]                                                                                                                  | *    | 1.23 | *    | *    | * | 2 | 2 | MLRTAGR                                 | 1 |
|                                                                                                                                                                                                                                                                              |      |      |      |      |   |   | 1 | VSPHIK                                  | 1 |
| NALP2_HUMAN (Q9NX02) NACHT, LRR and PYD-containing protein 2 (PYRIN domain and NACHT domain-containing protein 1) (PYRIN-containing APAF1-like protein 2) (Nucleotide-binding site protein 1) [MASS=120515]                                                                  | 0.00 | 2.73 | 0.55 | 0.00 | 1 | 1 | 3 | ADGKQLVEILTTHC[330]DSYWVEM[147]ASLQVFEK | 1 |
| NCOA6_HUMAN (Q14686) Nuclear receptor coactivator 6 (Amplified in breast cancer protein 3) (Cancer-amplified transcriptional coactivator ASC-2) (Activating signal cointegrator 2) (ASC-2) (Peroxisome proliferator-activated receptor-interacting protein) (P [MASS=219117] | *    | 1.21 | *    | *    | * | 2 | 2 | SQDVRMNGPM[147]GAGNSVR                  | 1 |
|                                                                                                                                                                                                                                                                              |      |      |      |      |   |   | 2 | AVPAQEVK                                | 1 |
| NCOR1_HUMAN (O75376) Nuclear receptor corepressor 1 (N-CoR1) (N-CoR) [MASS=270208]                                                                                                                                                                                           | 0.00 | 1.07 | *    | *    | * | 1 | 3 | SPERSHVSSEPYEPISPPQVPVHEK               | 1 |
| NDRG2_HUMAN (Q9UN36) Protein NDRG2 (Protein Syld709613) [MASS=40798]                                                                                                                                                                                                         | 1.00 | 6.20 | 0.51 | 0.00 | 1 | 1 | 3 | C[339]PVM[147]LVVGDQAPHEDAVVEC[339]NSK  | 1 |
| NDUA7_HUMAN (O95182) NADH dehydrogenase [ubiquinone] 1 alpha subcomplex subunit 7 (EC 1.6.5.3) (EC 1.6.99.3) (NADH-ubiquinone oxidoreductase subunit B14.5a) (Complex I-B14.5a) (CI-B14.5a) [MASS=12420]                                                                     | 0.00 | 8.04 | 2.43 | 0.00 | 1 | 1 | 2 | LSNNYYC[339]TR                          | 1 |

|                                                                                                                                                                                                                                 |      |      |       |      |   |   |   |                                   |   |
|---------------------------------------------------------------------------------------------------------------------------------------------------------------------------------------------------------------------------------|------|------|-------|------|---|---|---|-----------------------------------|---|
| NDUA8_HUMAN (P51970) NADH dehydrogenase [ubiquinone] 1 alpha subcomplex subunit 8 (EC 1.6.5.3) (EC 1.6.99.3) (NADH-ubiquinone oxidoreductase 19 kDa subunit) (Complex I-19KD) (CI-19KD) (Complex I-PGIV) (CI-PGIV) [MASS=19974] | 1.00 | 7.60 | 2.40  | 0.01 | 3 | 2 | 2 | C[330]ALDFFR                      | 1 |
|                                                                                                                                                                                                                                 |      |      |       |      |   |   | 1 | C[339]ALDFFR                      | 1 |
|                                                                                                                                                                                                                                 |      |      |       |      |   |   | 1 | C[339]LEEGK                       | 1 |
|                                                                                                                                                                                                                                 |      |      |       |      |   |   | 2 | C[339]ALDFFR                      | 1 |
| NDUA9_HUMAN (Q16795) NADH dehydrogenase [ubiquinone] 1 alpha subcomplex subunit 9, mitochondrial precursor (EC 1.6.5.3) (EC 1.6.99.3) (NADH-ubiquinone oxidoreductase 39 kDa subunit) (Complex I-39KD) (CI-39KD) [MASS=42509]   | *    | 6.10 | *     | *    | * | 1 | 3 | VLSMSRSAITAIATSVC[339]HGPPC[330]R | 1 |
| NDUAA_HUMAN (O95299) NADH dehydrogenase [ubiquinone] 1 alpha subcomplex subunit 10, mitochondrial precursor (EC 1.6.5.3) (EC 1.6.99.3) (NADH-ubiquinone oxidoreductase 42 kDa subunit) (Complex I-42KD) (CI-42KD) [MASS=40750]  | 0.71 | 2.54 | 1.43  | 0.00 | 1 | 1 | 2 | C[339]EVLQYSAR                    | 1 |
| NDUBA_HUMAN (O96000) NADH dehydrogenase [ubiquinone] 1 beta subcomplex subunit 10 (EC 1.6.5.3) (EC 1.6.99.3) (NADH-ubiquinone oxidoreductase PDSW subunit) (Complex I-PDSW) (CI-PDSW) [MASS=20645]                              | 0.83 | 6.43 | 1.68  | 0.00 | 1 | 1 | 2 | EGQNYQQNC[339]JK                  | 1 |
| NEK4_HUMAN (P51957) Serine/threonine-protein kinase Nek4 (EC 2.7.11.1) (NimA-related protein kinase 4) (Serine/threonine-protein kinase 2) (Serine/threonine-protein kinase NRK2) [MASS=94571]                                  | *    | 1.43 | *     | *    | * | 1 | 3 | PQEEDQPLPARR                      | 1 |
| NELFB_HUMAN (Q8WX92) Negative elongation factor B (NELF-B) (Cofactor of BRCA1) [MASS=65697]                                                                                                                                     | 0.00 | 2.24 | 11.54 | 0.02 | 2 | 1 | 2 | MPSLQPVVM[147]C[339]VM[147]K      | 2 |
| NEUR3_HUMAN (Q9UQ49) Sialidase-3 (EC 3.2.1.18) (Membrane sialidase) (Ganglioside sialidase) (N-acetyl-alpha-neuraminidase 3) [MASS=48252]                                                                                       | 0.00 | 3.50 | *     | *    | * | 1 |   |                                   |   |

|                                                                                                                                                               |      |      |      |      |   |   |   |                      |   |
|---------------------------------------------------------------------------------------------------------------------------------------------------------------|------|------|------|------|---|---|---|----------------------|---|
| NEUR3_HUMAN (Q9UQ49) Sialidase-3 (EC 3.2.1.18) (Membrane sialidase) (Ganglioside sialidase) (N-acetyl-alpha-neuraminidase 3) [MASS=48252]                     | 0.00 | 3.50 | *    | *    | * | 1 |   |                      |   |
| NFAC3_HUMAN (Q12968) Nuclear factor of activated T-cells, cytoplasmic 3 (NF-ATc3) (NFATc3) (T cell transcription factor NFAT4) (NF-AT4) (NFATx) [MASS=115593] | *    | 0.65 | *    | *    | * | 1 | 1 | LLGYNEK              | 1 |
| NFASC_HUMAN (O94856) Neurofascin precursor [MASS=150026]                                                                                                      | 0.55 | 2.97 | 0.73 | 0.00 | 1 | 3 | 3 | EFTTPEGVPSAPR        | 1 |
|                                                                                                                                                               |      |      |      |      |   |   | 3 | SGTLVIDFRSGGR        | 1 |
|                                                                                                                                                               |      |      |      |      |   |   | 2 | LDC[330]PFFGSP IPTLR | 1 |



|   |                 |    |
|---|-----------------|----|
| 3 | SSFSRVSGSPSSGFR | 1  |
| 3 | SYTLDSLGNPSAYR  | 20 |

|                                                                                                                                                              |      |      |   |   |   |   |
|--------------------------------------------------------------------------------------------------------------------------------------------------------------|------|------|---|---|---|---|
| NFM_HUMAN (P07197) Neurofilament triplet M protein (160 kDa neurofilament protein) (Neurofilament medium polypeptide) (NF-M) (Neurofilament 3) [MASS=102316] | 0.00 | 3.17 | * | * | * | 2 |
|--------------------------------------------------------------------------------------------------------------------------------------------------------------|------|------|---|---|---|---|

|                                                                                              |      |      |      |      |   |   |   |                                           |   |
|----------------------------------------------------------------------------------------------|------|------|------|------|---|---|---|-------------------------------------------|---|
| NGN2_HUMAN (Q9H2A3) Neurogenin 2 [MASS=28621]                                                | *    | 4.04 | *    | *    | * | 1 | 3 | LLGLVHDC[339]KRR                          | 1 |
| NIPS1_HUMAN (Q9BPW8) Protein NipSnap1 [MASS=33310]                                           | 0.23 | 4.93 | 1.24 | 0.00 | 1 | 1 | 2 | FSGGYPALM[147]DC[339]M[147]NK             | 1 |
| NIT1_HUMAN (Q86X76) Nitrilase homolog 1 (EC 3.5.-.-) [MASS=35896]                            | 0.69 | 5.20 | 1.22 | 0.00 | 1 | 1 | 2 | LGAC[339]LAFLPEAFDFIAR                    | 1 |
| NKX22_HUMAN (O95096) Homeobox protein Nkx-2.2 (Homeobox protein NK-2 homolog B) [MASS=30132] | 0.00 | 8.06 | *    | *    | * | 1 | 3 | EHLASLIRLTPTQVKIWFQNHR                    | 1 |
| NOL11_HUMAN (Q9H8H0) Nucleolar protein 11 [MASS=81123]                                       | *    | 3.62 | *    | *    | * | 1 | 3 | KDVQLLQLC[330]LQQFPDIPESVTC[339]AC[339]LK | 1 |
| NOL8_HUMAN (Q76FK4) Nucleolar protein 8 (Nucleolar protein Nop132) [MASS=131616]             | *    | 1.03 | *    | *    | * | 1 | 3 | EEGTPWNEDC[330]GK                         | 1 |
| NOP5_HUMAN (Q9Y2X3) Nucleolar protein NOP5 (Nucleolar protein 5) (NOP58) [MASS=59578]        | 0.00 | 2.08 | *    | *    | * | 1 | 3 | TEKYEHKSEVK                               | 1 |

|                                                                                                                                                                                                                                    |      |       |      |      |   |   |   |                                   |                                      |   |
|------------------------------------------------------------------------------------------------------------------------------------------------------------------------------------------------------------------------------------|------|-------|------|------|---|---|---|-----------------------------------|--------------------------------------|---|
|                                                                                                                                                                                                                                    |      |       |      |      |   |   |   | 3                                 | C[339]SC[330]PHSSPGPR                | 8 |
| NOTC4_HUMAN (Q99466) Neurogenic locus notch homolog protein 4 precursor (Notch 4) (hNotch4) [Contains: Notch 4 extracellular truncation; Notch 4 intracellular domain] [MASS=209621]                                               | 0.00 | 1.00  | 2.92 | 0.00 | 1 | 2 |   |                                   |                                      |   |
|                                                                                                                                                                                                                                    |      |       |      |      |   |   |   | 2                                 | C[339]LPGFEGPR                       | 1 |
|                                                                                                                                                                                                                                    |      |       |      |      |   |   |   | 3                                 | C[330]SC[339]PHSSPGPR                | 2 |
| NR6A1_HUMAN (Q15406) Orphan nuclear receptor NR6A1 (Germ cell nuclear factor) (GCNF) (Retinoid receptor-related testis-specific receptor) (RTR) [MASS=54383]                                                                       | 0.00 | 1.88  | 0.14 | 0.00 | 1 | 1 | 3 | C[330]LQM[147]GM[147]NRK          | 1                                    |   |
|                                                                                                                                                                                                                                    |      |       |      |      |   |   |   | 3                                 | HESHTWSELSSESLTSDSQSGIM[147]LSSVGTSK | 1 |
|                                                                                                                                                                                                                                    |      |       |      |      |   |   |   | 2                                 | C[330]PNGFFGQR                       | 1 |
|                                                                                                                                                                                                                                    |      |       |      |      |   |   |   | 3                                 | VALVKVLDKWPLR                        | 5 |
| NRG2_HUMAN (O14511) Pro-neuregulin-2, membrane-bound isoform precursor (Pro-NRG2) [Contains: Neuregulin-2 (NRG-2) (Neural- and thymus-derived activator for ERBB kinases) (NTAK) (Divergent of neuregulin-1) (DON-1)] [MASS=91678] | 0.00 | 7.41  | 0.22 | 0.00 | 1 | 4 |   |                                   |                                      |   |
|                                                                                                                                                                                                                                    |      |       |      |      |   |   |   | 2                                 | QNM[147]C[330]PAHQNR                 | 3 |
| NSF_HUMAN (P46459) Vesicle-fusing ATPase (EC 3.6.4.6) (Vesicular-fusion protein NSF) (N-ethylmaleimide sensitive fusion protein) (NEM-sensitive fusion protein) [MASS=82654]                                                       | *    | 0.81  | *    | *    | * | 1 | 1 | IC[330]SPDK                       | 1                                    |   |
| NU3M_HUMAN (P03897) NADH-ubiquinone oxidoreductase chain 3 (EC 1.6.5.3) (NADH dehydrogenase subunit 3) [MASS=13186]                                                                                                                | 0.94 | 13.04 | 1.72 | 0.00 | 1 | 1 | 2 | STPYEC[339]GFDPM[147]SPAR         | 1                                    |   |
| NUAM_HUMAN (P28331) NADH-ubiquinone oxidoreductase 75 kDa subunit, mitochondrial precursor (EC 1.6.5.3) (EC 1.6.99.3) (Complex I-75Kd) (CI-75Kd) [MASS=79467]                                                                      | 1.00 | 6.05  | 1.39 | 0.02 | 2 | 2 | 2 | VLFLLGADGGC[339]ITR               | 1                                    |   |
|                                                                                                                                                                                                                                    |      |       |      |      |   |   | 3 | DC[339]FIYQGHGDVGAPIADVILPGAAYTEK | 1                                    |   |

|                                                                                                                                                                                                                                                                             |      |       |      |      |   |   |   |                               |   |
|-----------------------------------------------------------------------------------------------------------------------------------------------------------------------------------------------------------------------------------------------------------------------------|------|-------|------|------|---|---|---|-------------------------------|---|
| NUBM_HUMAN (P49821) NADH-ubiquinone oxidoreductase 51 kDa subunit, mitochondrial precursor (EC 1.6.5.3) (EC 1.6.99.3) (Complex I-51KD) (CI-51KD) (NADH dehydrogenase flavoprotein 1) [MASS=50817]                                                                           | 1.00 | 7.54  | 1.64 | 0.05 | 3 | 2 | 2 | GAGAYIC[339]GEETALIESIEGK     | 2 |
|                                                                                                                                                                                                                                                                             |      |       |      |      |   |   | 2 | NAC[339]GSGYDFDVFVVR          | 1 |
| NUCM_HUMAN (O75306) NADH-ubiquinone oxidoreductase 49 kDa subunit, mitochondrial precursor (EC 1.6.5.3) (EC 1.6.99.3) (Complex I-49KD) (CI-49KD) [MASS=52545]                                                                                                               | *    | 2.16  | *    | *    | * | 1 | 2 | VDDAKVSPPK                    | 1 |
| NUD15_HUMAN (Q9NV35) Probable 7,8-dihydro-8-oxoguanine triphosphatase NUDT15 (EC 3.1.6.-) (8-oxo-dGTPase NUDT15) (Nucleoside diphosphate-linked moiety X motif 15) (Nudix motif 15) [MASS=18609]                                                                            | 0.00 | 17.68 | *    | *    | * | 1 | 3 | NVEPEKNESWEWVPWEELPPLDQLFWGLR | 1 |
| NUIM_HUMAN (O00217) NADH-ubiquinone oxidoreductase 23 kDa subunit, mitochondrial precursor (EC 1.6.5.3) (EC 1.6.99.3) (Complex I-23KD) (CI-23KD) (TYKY subunit) [MASS=23705]                                                                                                | *    | 5.71  | *    | *    | * | 1 | 2 | YVNMQDPEMDMK                  | 1 |
|                                                                                                                                                                                                                                                                             |      |       |      |      |   |   | 2 | YVNM[147]QDPEMDM[147]K        | 1 |
| NUMM_HUMAN (O75380) NADH-ubiquinone oxidoreductase 13 kDa-A subunit, mitochondrial precursor (EC 1.6.5.3) (EC 1.6.99.3) (Complex I-13KD-A) (CI-13KD-A) [MASS=13712]                                                                                                         | 0.91 | 12.10 | 1.59 | 0.00 | 1 | 1 | 2 | VIAC[339]DGGGGALGHPK          | 1 |
| O10H5_HUMAN (Q8NGA6) Olfactory receptor 10H5 [MASS=34900]                                                                                                                                                                                                                   | *    | 3.17  | *    | *    | * | 1 | 3 | VAMKKTC[330]FTK               | 1 |
| ODB2_HUMAN (P11182) Lipoamide acyltransferase component of branched-chain alpha-keto acid dehydrogenase complex, mitochondrial precursor (EC 2.3.1.168) (Dihydrolipoyllysine-residue (2-methylpropanoyl)transferase) (E2) (Dihydrolipoamide branched chain tra [MASS=53487] | 0.00 | 3.32  | 1.42 | 0.00 | 1 | 1 | 2 | NVQIC[339]SIFDIATELNR         | 1 |

|                                                                                                                                                                                                                                                                             |      |      |      |      |   |   |   |                                            |   |
|-----------------------------------------------------------------------------------------------------------------------------------------------------------------------------------------------------------------------------------------------------------------------------|------|------|------|------|---|---|---|--------------------------------------------|---|
| ODP2_HUMAN (P10515) Dihydrolipoyllysine-residue acetyltransferase component of pyruvate dehydrogenase complex, mitochondrial precursor (EC 2.3.1.12) (Pyruvate dehydrogenase complex E2 subunit) (PDCE2) (E2) (Dihydrolipoamide S-acetyltransferase component [MASS=65781]) | 0.00 | 4.89 | 1.05 | 0.00 | 1 | 1 | 3 | NFSAIINPPQAC[339]ILAIGASEDKLVPADNEK        | 1 |
| ODPAT_HUMAN (P29803) Pyruvate dehydrogenase E1 component alpha subunit, testis-specific form, mitochondrial precursor (EC 1.2.4.1) (PDHE1-A type II) [MASS=42933]                                                                                                           | 0.00 | 2.84 | *    | *    | * | 1 | 3 | GPILMELQTYR                                | 1 |
| ODPA_HUMAN (P08559) Pyruvate dehydrogenase E1 component alpha subunit, somatic form, mitochondrial precursor (EC 1.2.4.1) (PDHE1-A type I) [MASS=43295]                                                                                                                     | 0.00 | 2.56 | 1.45 | 0.00 | 1 | 1 | 2 | VDGM[147]DILC[339]VR                       | 1 |
| OPA1_HUMAN (O60313) Dynamin-like 120 kDa protein, mitochondrial precursor (Optic atrophy 1 gene protein) [MASS=111657]                                                                                                                                                      | 0.00 | 1.35 | 1.06 | 0.00 | 1 | 1 | 2 | AAVAC[330]EVC[330]QSLVK                    | 1 |
| OPHN1_HUMAN (O60890) Oligophrenin 1 [MASS=91640]                                                                                                                                                                                                                            | 0.00 | 1.25 | 0.15 | 0.00 | 1 | 1 | 3 | RM[147]KEAPQTC[330]K                       | 2 |
| OR7C2_HUMAN (O60412) Olfactory receptor 7C2 (Olfactory receptor 19-18) (OR19-18) [MASS=35278]                                                                                                                                                                               | 0.00 | 8.12 | 0.40 | 0.00 | 1 | 1 | 3 | LC[330]GLLVLGSWC[330]ISMV[147]GSLLETILTILR | 1 |
| OTUD3_HUMAN (Q5T2D3) OTU domain-containing protein 3 [MASS=45124]                                                                                                                                                                                                           | 0.00 | 6.28 | 2.35 | 0.00 | 1 | 1 | 3 | QC[339]GPLWEEGGSGARIFGNQGLNEGR             | 1 |
| OX2G_HUMAN (P41217) OX-2 membrane glycoprotein precursor (CD200 antigen) [MASS=31264]                                                                                                                                                                                       | 0.96 | 5.76 | 0.65 | 0.00 | 1 | 1 | 2 | EVIC[330]QVLHLGTVTDFK                      | 1 |
| P2Y13_HUMAN (Q9BPV8) P2Y purinoceptor 13 (P2Y13) (G-protein coupled receptor 86) (G-protein coupled receptor 94) [MASS=38440]                                                                                                                                               | 0.00 | 7.21 | 0.15 | 0.00 | 1 | 1 | 3 | ETTLFLAATNIC[330]M[147]DPLIYIFLC[330]KK    | 1 |

|                                                                                                                                                                                                                                                                             |      |      |      |      |   |   |   |                            |    |
|-----------------------------------------------------------------------------------------------------------------------------------------------------------------------------------------------------------------------------------------------------------------------------|------|------|------|------|---|---|---|----------------------------|----|
| P5CS_HUMAN (P54886) Delta 1-pyrroline-5-carboxylate synthetase (P5CS) (Aldehyde dehydrogenase 18 family member A1) [Includes: Glutamate 5-kinase (EC 2.7.2.11) (Gamma-glutamyl kinase) (GK); Gamma-glutamyl phosphate reductase (GPR) (EC 1.2.1.41) (Glutamate [MASS=87302] | 0.00 | 2.64 | *    | *    | * | 1 | 3 | QALHSGQNQLKEM[147]AIPVLEAR | 1  |
| PA1B2_HUMAN (P68402) Platelet-activating factor acetylhydrolase IB subunit beta (EC 3.1.1.47) (PAF acetylhydrolase 30 kDa subunit) (PAF-AH 30 kDa subunit) (PAF-AH subunit beta) (PAFAH subunit beta) [MASS=25569]                                                          | 0.00 | 2.62 | 0.77 | 0.00 | 1 | 1 | 2 | FVLDC[330]K                | 1  |
|                                                                                                                                                                                                                                                                             |      |      |      |      |   |   | 3 | VLMLGGSALNHNYR             | 17 |
| PAPPA_HUMAN (Q13219) Pappalysin-1 precursor (EC 3.4.24.79) (Pregnancy-associated plasma protein-A) (PAPP-A) (Insulin-like growth factor-dependent IGF-binding protein 4 protease) (IGF-dependent IGFBP-4 protease) (IGFBP-4ase) [MASS=181140]                               | 0.00 | 0.86 | *    | *    | * | 1 |   |                            |    |
| PAR4_HUMAN (Q96RI0) Proteinase-activated receptor 4 precursor (PAR-4) (Thrombin receptor-like 3) (Coagulation factor II receptor-like 3) [MASS=41163]                                                                                                                       | 0.00 | 6.23 | *    | *    | * | 1 | 2 | LPSTMLLMNLATADLLLALALPPR   | 1  |
| PARP4_HUMAN (Q9UKK3) Poly [ADP-ribose] polymerase 4 (EC 2.4.2.30) (PARP-4) (Vault poly(ADP-ribose) polymerase) (VPARP) (193 kDa vault protein) (PARP-related/lalpal-related H5/proline-rich) (PH5P) [MASS=192587]                                                           | *    | 1.16 | *    | *    | * | 1 | 3 | DC[339]PFLISSHFLLDDGMETRR  | 1  |

|                                                                                                                                                                                                                                              |      |      |      |      |   |   |   |                                         |   |
|----------------------------------------------------------------------------------------------------------------------------------------------------------------------------------------------------------------------------------------------|------|------|------|------|---|---|---|-----------------------------------------|---|
| PAX3_HUMAN (P23760) Paired box protein Pax-3 (HUP2) [MASS=52967]                                                                                                                                                                             | *    | 2.71 | *    | *    | * | 1 | 2 | M[147]TTLGAVPRMMR                       | 1 |
| PC11X_HUMAN (Q9BZA7) Protocadherin-11 X-linked precursor (Protocadherin-11) (Protocadherin on the X chromosome) (PCDH-X) (Protocadherin-S) [MASS=147557]                                                                                     | 0.00 | 0.59 | *    | *    | * | 1 | 1 | YLFTILAK                                | 1 |
| PC11Y_HUMAN (Q9BZA8) Protocadherin-11 Y-linked precursor (Protocadherin-11) (Protocadherin-22) (Protocadherin on the Y chromosome) (PCDH-Y) (Protocadherin prostate cancer) (Protocadherin-PC) [MASS=146774]                                 | 0.00 | 1.42 | *    | *    | * | 1 | 2 | DLNLSLIPNKSLTTTM[147]QFK                | 1 |
| PCDA5_HUMAN (Q9Y5H7) Protocadherin alpha 5 precursor (PCDH-alpha5) [MASS=102047]                                                                                                                                                             | 0.00 | 2.99 | *    | *    | * | 1 | 3 | TDLM[147]AFSPSLPQGPTSTDNPRQPNPDWR       | 1 |
| PCDA6_HUMAN (Q9UN73) Protocadherin alpha 6 precursor (PCDH-alpha6) [MASS=102715]                                                                                                                                                             | *    | 2.42 | *    | *    | * | 1 | 3 | DREDLLEVNQLQNGILFVNSRIDR                | 1 |
| PCDGI_HUMAN (Q9Y5F9) Protocadherin gamma B6 precursor (PCDH-gamma-B6) [MASS=101043]                                                                                                                                                          | 0.00 | 3.23 | 1.47 | 0.00 | 1 | 1 | 3 | NNQSDFEDVERYTM[147]EVEAKDGGGLSTQC[339]K | 1 |
| PCDGL_HUMAN (Q9Y5F7) Protocadherin gamma C4 precursor (PCDH-gamma-C4) [MASS=101213]                                                                                                                                                          | *    | 1.81 | *    | *    | * | 1 | 2 | SAFRNQFSLVTAGPLDR                       | 1 |
| PCF11_HUMAN (O94913) Pre-mRNA cleavage complex 2 protein Pcf11 (Pre-mRNA cleavage complex II protein Pcf11) (Fragment) [MASS=183979]                                                                                                         | 0.00 | 1.27 | *    | *    | * | 1 | 3 | GQPVGGLRFEGGHGPGSAAIR                   | 1 |
| PCLO_HUMAN (Q9Y6V0) Protein piccolo (Aczonin) [MASS=566653]                                                                                                                                                                                  | 0.00 | 1.08 | *    | *    | * | 4 | 3 | SAEEMYEEM[147]M[147]HK                  | 1 |
|                                                                                                                                                                                                                                              |      |      |      |      |   |   | 3 | PLAQQPGLQSPAKAPGPTKTPAQTK               | 1 |
|                                                                                                                                                                                                                                              |      |      |      |      |   |   | 1 | PVSQTGFGK                               | 1 |
|                                                                                                                                                                                                                                              |      |      |      |      |   |   | 1 | AIPRPASDSK                              | 1 |
| PCSK6_HUMAN (P29122) Proprotein convertase subtilisin/kexin type 6 precursor (EC 3.4.21.-) (Paired basic amino acid cleaving enzyme 4) (Subtilisin/kexin-like protease PACE4) (Subtilisin-like proprotein convertase 4) (SPC4) [MASS=106420] | *    | 0.72 | *    | *    | * | 1 | 1 | VNGAGHK                                 | 1 |

|                                                                                                                                                                    |      |       |      |      |   |   |   |                                    |   |
|--------------------------------------------------------------------------------------------------------------------------------------------------------------------|------|-------|------|------|---|---|---|------------------------------------|---|
| PDCD7_HUMAN (Q8N8D1) Programmed cell death protein 7 (ES18) (HES18) [MASS=54700]                                                                                   | 0.22 | 4.33  | 1.54 | 0.00 | 1 | 1 | 3 | KGVC[330]PPASADETFTTHLQRLR         | 1 |
| PDE3A_HUMAN (Q14432) cGMP-inhibited 3',5' cyclic phosphodiesterase A (EC 3.1.4.17) (Cyclic GMP-inhibited phosphodiesterase A) (CGI-PDE A) [MASS=124979]            | 0.00 | 2.98  | 0.76 | 0.00 | 1 | 3 | 1 | M[147]AVPGDAAR                     | 1 |
|                                                                                                                                                                    |      |       |      |      |   |   | 1 | GGAPGGGAR                          | 1 |
|                                                                                                                                                                    |      |       |      |      |   |   | 2 | RSSSVVSAEM[147]SGC[330]SSK         | 1 |
| PDE5A_HUMAN (O76074) cGMP-specific 3',5'-cyclic phosphodiesterase (EC 3.1.4.35) (CGB-PDE) (cGMP-binding cGMP-specific phosphodiesterase) [MASS=100012]             | 0.25 | 1.26  | 1.28 | 0.00 | 1 | 1 | 2 | SLLC[339]TPIKNGK                   | 1 |
| PDE8A_HUMAN (O60658) High-affinity cAMP-specific and IBMX-insensitive 3',5'-cyclic phosphodiesterase 8A (EC 3.1.4.17) [MASS=93303]                                 | *    | 1.93  | *    | *    | * | 2 | 3 | VC[339]NGNNKAEK                    | 1 |
|                                                                                                                                                                    |      |       |      |      |   |   | 1 | GLDEM[147]K                        | 1 |
| PDIA6_HUMAN (Q15084) Protein disulfide-isomerase A6 precursor (EC 5.3.4.1) (Protein disulfide isomerase P5) (Thioredoxin domain-containing protein 7) [MASS=48121] | *    | 1.36  | *    | *    | * | 1 | 1 | EPWDGR                             | 1 |
| PDZK6_HUMAN (Q9ULD6) PDZ domain-containing protein 6 [MASS=105647]                                                                                                 | *    | 4.35  | *    | *    | * | 2 | 3 | GLNSGDHSDSAKSVSSLNPVK              | 1 |
|                                                                                                                                                                    |      |       |      |      |   |   | 2 | QGDGERLVVHGLLPGGSAM[147]K          | 1 |
| PEL11_HUMAN (Q96FA3) Protein pellino homolog 1 (Pellino-1) (Pellino-related intracellular signaling molecule) [MASS=46286]                                         | 0.00 | 11.24 | 5.23 | 0.00 | 1 | 2 | 3 | HLEALRQEINAARPQC[330]PVGFNFLAFPSMK | 1 |
| PGCB_HUMAN (Q96GW7) Brevican core protein precursor (Brain-enriched hyaluronan-binding protein) (Protein BEHAB) [MASS=99117]                                       | *    | 1.43  | *    | *    | * | 1 | 2 | EAEVLVARGVRVK                      | 1 |
|                                                                                                                                                                    |      |       |      |      |   |   | 1 | GIKQEAFK                           | 9 |
| PGLB_HUMAN (Q99645) Dermatan sulfate proteoglycan 3 precursor (Epiphycan) (Small chondroitin/dermatan sulfate proteoglycan) (Proteoglycan-Lb) (PG-Lb) [MASS=36578] | *    | 2.48  | *    | *    | * | 1 |   |                                    |   |

|                                                                                                                                                                                                                                                        |      |      |      |      |   |   |   |                         |   |
|--------------------------------------------------------------------------------------------------------------------------------------------------------------------------------------------------------------------------------------------------------|------|------|------|------|---|---|---|-------------------------|---|
| PHAR1_HUMAN (Q9C0D0) Phosphatase and actin regulator 1 [MASS=66308]                                                                                                                                                                                    | *    | 1.72 | *    | *    | * | 1 | 2 | LTAADKAAIR              | 1 |
| PHEX_HUMAN (P78562) Phosphate-regulating neutral endopeptidase (EC 3.4.24.-) (Metalloendopeptidase homolog PEX) (X-linked hypophosphatemia protein) (HYP) (Vitamin D-resistant hypophosphatemic rickets protein) [MASS=86473]                          | 0.31 | 1.74 | 0.85 | 0.00 | 1 | 1 | 2 | C[330]M[147]INQYSNYYWKK | 1 |
| PIGO_HUMAN (Q8TEQ8) Phosphatidylinositol-glycan biosynthesis, class O protein (PIG-O) [MASS=118698]                                                                                                                                                    | *    | 0.73 | *    | *    | * | 1 | 2 | QLTSAGRR                | 1 |
| PKHA5_HUMAN (Q9HAU0) Pleckstrin homology domain-containing family A member 5 (Phosphoinositol 3-phosphate-binding protein 2) (PEPP-2) [MASS=127463]                                                                                                    | *    | 1.08 | *    | *    | * | 1 | 3 | VHNFGKRSNSIK            | 1 |
| PLCC_HUMAN (Q9NRZ7) 1-acyl-sn-glycerol-3-phosphate acyltransferase gamma (EC 2.3.1.51) (1-AGP acyltransferase 3) (1-AGPAT 3) (Lysophosphatidic acid acyltransferase-gamma) (LPAAT-gamma) (1-acylglycerol-3-phosphate O-acyltransferase 3) [MASS=43381] | *    | 2.39 | *    | *    | * | 1 | 1 | VSM[147]EVAAAK          | 1 |



|                                                                                                                                                                                                        |      |      |      |      |   |   |   |                              |   |
|--------------------------------------------------------------------------------------------------------------------------------------------------------------------------------------------------------|------|------|------|------|---|---|---|------------------------------|---|
| PLCD1_HUMAN (P51178) 1-phosphatidylinositol-4,5-bisphosphate phosphodiesterase delta 1 (EC 3.1.4.11) (Phosphoinositide phospholipase C) (PLC-delta-1) (Phospholipase C-delta-1) (PLC-III) [MASS=85763] | 0.00 | 1.46 | 0.04 | 7.92 | 3 | 1 |   |                              |   |
| PLXA3_HUMAN (P51805) Plexin-A3 precursor (Plexin-4) (Semaphorin receptor SEX) [MASS=207664]                                                                                                            | *    | 0.48 | *    | *    | * | 1 | 1 | GHGATRTVR                    | 1 |
| POLK_HUMAN (Q9UBT6) DNA polymerase kappa (EC 2.7.7.7) (DINB protein) (DINP) [MASS=98808]                                                                                                               | 0.00 | 2.41 | *    | *    | * | 1 | 3 | DDLLLRMGLNDNKAGMEGLDK        | 1 |
| POTE8_HUMAN (Q6S8J7) Prostate, ovary, testis-expressed protein on chromosome 8 [MASS=56165]                                                                                                            | 0.00 | 4.62 | *    | *    | * | 1 | 3 | AAWWGEVPRADLIVMLRGPINK       | 1 |
| PP4C_HUMAN (P60510) Serine/threonine-protein phosphatase 4 catalytic subunit (EC 3.1.3.16) (PP4C) (Pp4) (Protein phosphatase X) (PP-X) [MASS=35080]                                                    | 0.00 | 7.49 | 0.07 | 0.00 | 1 | 1 | 3 | IFC[330]VHGGLSPSIQTLDQIRTIDR | 1 |
| PPARG_HUMAN (P37231) Peroxisome proliferator-activated receptor gamma (PPAR-gamma) [MASS=57620]                                                                                                        | *    | 0.99 | *    | *    | * | 1 | 1 | MTDLR                        | 1 |
| PPOX_HUMAN (P50336) Protoporphyrinogen oxidase (EC 1.3.3.4) (PPO) [MASS=50765]                                                                                                                         | 0.00 | 3.35 | 1.13 | 0.00 | 1 | 1 | 2 | RLGPEVASLAMDSLCL[339]R       | 1 |

|                                                                                                                                                                                                                                                                |      |       |      |      |   |   |   |                                          |   |
|----------------------------------------------------------------------------------------------------------------------------------------------------------------------------------------------------------------------------------------------------------------|------|-------|------|------|---|---|---|------------------------------------------|---|
| PR285_HUMAN (Q9BYK8) Peroxisomal proliferator-activated receptor A-interacting complex 285 kDa protein (EC 3.6.1.-) (ATP-dependent helicase PRIC285) (PPAR-alpha-interacting complex protein 285) (PPAR-gamma DBD-interacting protein 1) (PDIP1) [MASS=294533] | 0.00 | 0.91  | 1.42 | 0.00 | 1 | 2 | 2 | C[339]IC[339]VVSHGAQVSALR                | 1 |
|                                                                                                                                                                                                                                                                |      |       |      |      |   |   | 3 | VC[330]RRPTM[147]PS                      | 1 |
| PRDM7_HUMAN (Q9NQW5) PR domain zinc finger protein 7 (PR domain-containing protein 7) [MASS=45965]                                                                                                                                                             | *    | 3.19  | *    | *    | * | 1 | 2 | NHSSQNFPGPSAR                            | 1 |
| PRDM8_HUMAN (Q9NQV8) PR domain zinc finger protein 8 (PR domain-containing protein 8) [MASS=71709]                                                                                                                                                             | 0.00 | 3.34  | 0.10 | 0.00 | 1 | 1 | 3 | LQGAADLNGGC[330]GSLPSGGGGLPK             | 1 |
| PRDX3_HUMAN (P30048) Thioredoxin-dependent peroxide reductase, mitochondrial precursor (EC 1.11.1.15) (Peroxiredoxin-3) (PRX III) (Antioxidant protein 1) (AOP-1) (Protein MER5 homolog) (HBC189) [MASS=27692]                                                 | *    | 4.30  | *    | *    | * | 1 | 3 | HLSVNDLPVGR                              | 1 |
| PROZ_HUMAN (P22891) Vitamin K-dependent protein Z precursor [MASS=44744]                                                                                                                                                                                       | 0.00 | 4.50  | 1.33 | 0.00 | 1 | 1 | 3 | QC[330]VPHDQC[330]AC[330]GVLTSSEKR       | 1 |
| PRPS1_HUMAN (P60891) Ribose-phosphate pyrophosphokinase I (EC 2.7.6.1) (Phosphoribosyl pyrophosphate synthetase I) (PRS-I) (PPRibP) [MASS=34703]                                                                                                               | 0.00 | 11.99 | *    | *    | * | 2 | 2 | PNIKIFSGSSHQDLSQK                        | 1 |
|                                                                                                                                                                                                                                                                |      |       |      |      |   |   | 3 | PNIKIFSGSSHQDLSQKIADR                    | 1 |
| PRR11_HUMAN (Q96HE9) Proline-rich protein 11 [MASS=40085]                                                                                                                                                                                                      | 0.00 | 5.28  | *    | *    | * | 1 | 3 | ENM[147]ETGTGLTPVMTQALRR                 | 1 |
| PRS23_HUMAN (O95084) Serine protease 23 precursor (EC 3.4.21.-) (Putative secreted protein ZSIG13) [MASS=43001]                                                                                                                                                | 0.00 | 7.83  | *    | *    | * | 1 | 3 | LSTGC[330]JTGTLVAEKHVLTAHC[339]IHDGKTYVK | 1 |
| PSD1_HUMAN (Q99460) 26S proteasome non-ATPase regulatory subunit 1 (26S proteasome regulatory subunit RPN2) (26S proteasome regulatory subunit S1) (26S proteasome subunit p112) [MASS=105836]                                                                 | 0.00 | 1.26  | 0.34 | 0.00 | 1 | 1 | 3 | LC[330]MSLMQNKQFR                        | 1 |

|                                                                                                                                                                                                         |      |      |       |      |   |   |   |                                 |   |
|---------------------------------------------------------------------------------------------------------------------------------------------------------------------------------------------------------|------|------|-------|------|---|---|---|---------------------------------|---|
| PSL1_HUMAN (Q8TCT7) Signal peptide peptidase-like 2B (EC 3.4.23.-) (Protein SPP-like 2B) (Protein SPPL2b) (Intramembrane protease 4) (IMP4) (Presenilin-like protein 1) [MASS=64643]                    | 0.00 | 3.21 | 1.81  | 0.00 | 1 | 1 | 2 | M[147]LLLALFC[339]VAVSVVWGVFR   | 1 |
| PTPRO_HUMAN (Q16827) Receptor-type tyrosine-protein phosphatase O precursor (EC 3.1.3.48) (Glomerular epithelial protein 1) (Protein tyrosine phosphatase U2) (PTPase U2) (PTP-U2) [MASS=138281]        | *    | 1.64 | *     | *    | * | 1 | 3 | M[147]VLQKKSQIIVMLTQC[330]NEKR  | 1 |
| PTPRS_HUMAN (Q13332) Receptor-type tyrosine-protein phosphatase S precursor (EC 3.1.3.48) (R-PTP-S) (Protein-tyrosine phosphatase sigma) (R-PTP-sigma) [MASS=217093]                                    | 0.00 | 1.18 | 0.66  | 0.00 | 1 | 1 | 3 | DQIGVSGGVASFVC[330]QATGDPKPR    | 1 |
| PTPRU_HUMAN (Q92729) Receptor-type tyrosine-protein phosphatase U precursor (EC 3.1.3.48) (R-PTP-U) (Protein-tyrosine phosphatase J) (PTP-J) (Pancreatic carcinoma phosphatase 2) (PCP-2) [MASS=160227] | 0.00 | 1.47 | 0.46  | 0.00 | 1 | 1 | 3 | MVWQEHC[330]SSIVM[147]ITKLVEVGR | 1 |
| PUS3_HUMAN (Q9BZE2) tRNA pseudouridine synthase 3 (EC 5.4.99.-) (tRNA-uridine isomerase 3) (tRNA pseudouridylate synthase 3) [MASS=55615]                                                               | *    | 3.33 | *     | *    | * | 1 | 2 | M[147]ADNDTDRNQTEKLLK           | 1 |
| PX11C_HUMAN (Q96HA9) Peroxisomal membrane protein 11C (Peroxin-11C) (Peroxisomal biogenesis factor 11C) (PEX11gamma) (Pex11pgamma) [MASS=26636]                                                         | 0.00 | 4.98 | 27.08 | 0.00 | 1 | 1 | 3 | LLVVSTQLSHC[339]R               | 1 |
| PYR1_HUMAN (P27708) CAD protein [Includes: Glutamine-dependent carbamoyl-phosphate synthase (EC 6.3.5.5); Aspartate carbamoyltransferase (EC 2.1.3.2); Dihydroorotase (EC 3.5.2.3)] [MASS=242982]       | *    | 0.27 | *     | *    | * | 1 | 1 | LYELTR                          | 1 |
| R113A_HUMAN (O15541) RING finger protein 113A (Zinc finger protein 183) [MASS=38787]                                                                                                                    | *    | 1.75 | *     | *    | * | 1 | 1 | APEHLR                          | 1 |

|                                                                                                                                                                                                             |      |       |      |      |   |   |   |                                          |   |
|-------------------------------------------------------------------------------------------------------------------------------------------------------------------------------------------------------------|------|-------|------|------|---|---|---|------------------------------------------|---|
| R51A1_HUMAN (Q96B01) RAD51-associated protein 1 (RAD51-interacting protein) [MASS=38457]                                                                                                                    | 0.00 | 6.82  | 0.26 | 0.00 | 1 | 1 | 3 | C[330]NALVTSVDSAPAAVKSESQSLPK            | 1 |
| RAB1A_HUMAN (P62820) Ras-related protein Rab-1A (YPT1-related protein) [MASS=22546]                                                                                                                         | *    | 5.88  | *    | *    | * | 1 | 3 | LLVGNKC[339]DLTTK                        | 3 |
| RAB28_HUMAN (P51157) Ras-related protein Rab-28 (Rab-26) [MASS=24841]                                                                                                                                       | 0.00 | 8.14  | 1.84 | 0.00 | 1 | 1 | 3 | HLRFC[339]QENGFSSHVSAK                   | 1 |
| RAF1_HUMAN (P04049) RAF proto-oncogene serine/threonine-protein kinase (EC 2.7.11.1) (Raf-1) (C-RAF) (cRaf) [MASS=73051]                                                                                    | *    | 2.01  | *    | *    | * | 1 | 2 | HVNILLFMGYMTK                            | 1 |
| RANB9_HUMAN (Q96S59) Ran-binding protein 9 (RanBP9) (RanBP7) (Ran-binding protein M) (RanBPM) (BPM90) (BPM-L) [MASS=77847]                                                                                  | 0.00 | 4.94  | 0.24 | 0.00 | 1 | 2 | 3 | GSTAHFSGFESC[330]SNGVISNKAHQSYC[330]HSNK | 1 |
|                                                                                                                                                                                                             |      |       |      |      |   |   | 1 | MIHFGR                                   | 1 |
| RASN_HUMAN (P01111) GTPase NRas precursor (Transforming protein N-Ras) [MASS=21229]                                                                                                                         | 0.00 | 12.70 | 0.76 | 0.00 | 1 | 1 | 3 | TGEGFLC[330]VFAINNSKSFADINLYR            | 1 |
| RBL2_HUMAN (Q08999) Retinoblastoma-like protein 2 (130 kDa retinoblastoma-associated protein) (PRB2) (P130) (RBR-2) [MASS=128356]                                                                           | *    | 2.37  | *    | *    | * | 2 | 3 | C[339]LNAGSGTETAER                       | 1 |
|                                                                                                                                                                                                             |      |       |      |      |   |   | 2 | C[339]SEQSLIEFFNKM[147]K                 | 1 |
| RBP17_HUMAN (Q9H2T7) Ran-binding protein 17 [MASS=124375]                                                                                                                                                   | 0.00 | 2.11  | 1.32 | 0.00 | 1 | 2 | 1 | NQWSVSR                                  | 1 |
|                                                                                                                                                                                                             |      |       |      |      |   |   | 2 | DTSLKDVLVLAC[330]SLLK                    | 1 |
| RDH13_HUMAN (Q8NBN7) Retinol dehydrogenase 13 (EC 1.1.1.-) [MASS=35932]                                                                                                                                     | *    | 6.04  | *    | *    | * | 2 | 2 | APAPEAEDEEVAR                            | 1 |
|                                                                                                                                                                                                             |      |       |      |      |   |   | 1 | LWAESAR                                  | 1 |
| RED2_HUMAN (Q9NS39) Double-stranded RNA-specific editase B2 (EC 3.5.-.-) (dsRNA adenosine deaminase B2) (RNA-dependent adenosine deaminase 3) (RNA-editing deaminase 2) (RNA-editing enzyme 2) [MASS=80621] | 0.00 | 4.47  | 0.59 | 0.00 | 1 | 1 | 3 | ENILFHLYVSTSPC[330]GDARLHSPYEITDLHSSK    | 1 |
|                                                                                                                                                                                                             |      |       |      |      |   |   | 2 | HFYNRR                                   | 3 |
| RELN_HUMAN (P78509) Reelin precursor (EC 3.4.21.-) [MASS=388399]                                                                                                                                            | 0.00 | 1.13  | 0.29 | 0.00 | 1 | 2 | 3 | LSPLWYKITGAQVGTGC[330]GTLNDGKSLYFNGPGK   | 1 |
| RGS12_HUMAN (O14924) Regulator of G-protein signaling 12 (RGS12) [MASS=156356]                                                                                                                              | 0.00 | 1.11  | 0.92 | 0.00 | 1 | 1 | 2 | FESC[330]SSDEEGGLYEGK                    | 1 |

|                                                                                                                                                                                                                                                            |      |       |      |      |   |   |                                                               |                                |   |
|------------------------------------------------------------------------------------------------------------------------------------------------------------------------------------------------------------------------------------------------------------|------|-------|------|------|---|---|---------------------------------------------------------------|--------------------------------|---|
| RHG07_HUMAN (Q96QB1) Rho-GTPase-activating protein 7 (Rho-type GTPase-activating protein 7) (Deleted in liver cancer 1 protein) (Dlc-1) (HP protein) (StAR-related lipid transfer protein 12) (StARD12) (START domain-containing protein 12) [MASS=122826] | 0.00 | 1.83  | 0.17 | 0.00 | 1 | 1 | 3                                                             | KPDTM[147]ILTQIEAKEAC[330]DWLR | 1 |
| RHG12_HUMAN (Q8IWW6) Rho-GTPase-activating protein 12 [MASS=96254]                                                                                                                                                                                         | 0.00 | 1.54  | *    | *    | * | 1 | 3                                                             | SFKVSSIDSSEQK                  | 1 |
| RHOB_HUMAN (P62745) Rho-related GTP-binding protein RhoB precursor (H6) [MASS=22123]                                                                                                                                                                       | 0.60 | 13.78 | 0.62 | 0.00 | 1 | 2 | 3 RYGSQNGC[330]INC[330]C[330]K<br>2 HFC[330]PNVPPIILVANK      | 1<br>1                         |   |
| RIC8A_HUMAN (Q9NPQ8) Synembryn-A (Protein Ric-8A) [MASS=59612]                                                                                                                                                                                             | 0.00 | 4.91  | 0.64 | 0.00 | 1 | 1 | 3 C[330]LDVLLTLEPHGDSTEFMGVNMDVIR                             | 1                              |   |
| RIF1_HUMAN (Q5UIP0) Telomere-associated protein RIF1 (Rap1-interacting factor 1 homolog) [MASS=274464]                                                                                                                                                     | 0.00 | 1.78  | 1.02 | 0.42 | 2 | 2 | 3 LDEVPKVYSC[339]LNNKLEK<br>3 SSSLNNEC[330]GSLDKTSPMSNSNNDERK | 1<br>1                         |   |
| RIMS1_HUMAN (Q86UR5) Regulating synaptic membrane exocytosis protein 1 (Rab3-interacting molecule 1) (RIM 1) [MASS=189071]                                                                                                                                 | *    | 1.18  | *    | *    | * | 2 | 1 RAPAAAR<br>3 QSRLDPSSAVLMR                                  | 1<br>1                         |   |
| RINT1_HUMAN (Q6NUQ1) RAD50-interacting protein 1 (RAD50 interactor 1) (Protein RINT-1) (HsRINT-1) [MASS=90631]                                                                                                                                             | *    | 1.26  | *    | *    | * | 1 | 2 GNRQTNVLSK                                                  | 1                              |   |
| RL18A_HUMAN (Q02543) 60S ribosomal protein L18a [MASS=20762]                                                                                                                                                                                               | *    | 9.09  | *    | *    | * | 1 | 2 AHSIQIMKVEEIAASK                                            | 1                              |   |
| RNF37_HUMAN (O94941) RING finger protein 37 (Ubiquitin-conjugating enzyme 7-interacting protein 5) (U-box domain-containing protein 5) [MASS=58965]                                                                                                        | 0.00 | 4.99  | 0.43 | 0.00 | 1 | 1 | 3 GALSLSHVAHLRIC[330]ITHVTGGGIPC[330]IK                       | 1                              |   |
| RNT2_HUMAN (O00584) Ribonuclease T2 precursor (EC 3.1.27.-) (Ribonuclease 6) [MASS=29481]                                                                                                                                                                  | 0.84 | 5.86  | 0.91 | 0.20 | 2 | 1 | 2 HGTC[339]AAQVDALNSQK<br>2 HGTC[330]AAQVDALNSQK              | 1<br>1                         |   |
| ROBO4_HUMAN (Q8WZ75) Roundabout homolog 4 precursor (Magic roundabout) [MASS=107457]                                                                                                                                                                       | *    | 2.78  | *    | *    | * | 1 | 3 SPGVPLLPDTSTFYGSLIAELPSSTPAR                                | 1                              |   |
| RP1_HUMAN (P56715) Oxygen-regulated protein 1 (Retinitis pigmentosa RP1 protein) (Retinitis pigmentosa 1 protein) [MASS=240660]                                                                                                                            | *    | 1.62  | *    | *    | * | 3 | 1 ESGENK<br>3 QQAINSTRYQDGLATKGILNK<br>2 AIEKLYGK             | 1<br>1<br>2                    |   |

|                                                                                                                                                                                                                                                                             |              |      |      |      |   |   |   |                                               |   |
|-----------------------------------------------------------------------------------------------------------------------------------------------------------------------------------------------------------------------------------------------------------------------------|--------------|------|------|------|---|---|---|-----------------------------------------------|---|
| RPC1_HUMAN (O14802) DNA-directed RNA polymerase III largest subunit (EC 2.7.7.6) (RPC155) (RPC1) [MASS=155748]                                                                                                                                                              | *            | 0.58 | *    | *    | * | 1 | 2 | EVEPLLGR                                      | 1 |
| RPGF6_HUMAN (Q8TEU7) Rap guanine nucleotide exchange factor 6 (PDZ domain-containing guanine nucleotide exchange factor 2) (PDZ-GEF2) (RA-GEF-2) [MASS=179406]                                                                                                              | 0.00         | 1.56 | *    | *    | * | 1 | 3 | C[330]WYILLSGSLVKGSM[147]VLPPC[339]SFGK       | 1 |
| RSF1_HUMAN (Q96T23) Remodeling and spacing factor 1 (Rsf-1) (Hepatitis B virus X-associated protein) (HBV pX-associated protein 8) (p325 subunit of RSF chromatin remodelling complex) [MASS=163004]                                                                        | 0.00         | 1.05 | 1.03 | 0.00 | 1 | 1 | 3 | IC[339]QEFNSTWAWEMEK                          | 1 |
| SACS_HUMAN (Q9NZJ4) Sacsin [MASS=436973]                                                                                                                                                                                                                                    | 0.00         | 1.62 | 1.49 | 0.00 | 1 | 5 | 3 | LPLELGTFFHQLFK                                | 1 |
|                                                                                                                                                                                                                                                                             |              |      |      |      |   |   | 2 | YSNILLNC[339]K                                | 1 |
|                                                                                                                                                                                                                                                                             |              |      |      |      |   |   | 2 | RNLWRDDNGVGVGR                                | 1 |
|                                                                                                                                                                                                                                                                             |              |      |      |      |   |   | 3 | ALGIFTKPSLSAVLK                               | 1 |
| 3                                                                                                                                                                                                                                                                           | DVGSAAFKIFLK | 1    |      |      |   |   |   |                                               |   |
| SAM50_HUMAN (Q9Y512) Sorting and assembly machinery component 50 homolog [MASS=51962]                                                                                                                                                                                       | *            | 3.20 | *    | *    | * | 1 | 2 | TKDDIIC[339]EIGDVFK                           | 1 |
| SAPS3_HUMAN (Q5H9R7) SAPS domain family member 3 (Sporulation-induced transcript 4-associated protein SAPL) (Protein phosphatase 6 regulatory subunit 3) [MASS=97669]                                                                                                       | 0.00         | 1.95 | 0.16 | 0.00 | 1 | 1 | 3 | C[330]QLIERILEAWEM[147]NEKK                   | 1 |
| SAP_HUMAN (P07602) Proactivator polypeptide precursor [Contains: Saposin A (Protein A); Saposin B-Val; Saposin B (Sphingolipid activator protein 1) (SAP-1) (Cerebroside sulfate activator) (CSAct) (Dispersin) (Sulfatide/GM1 activator); Saposin C (Co-beta- [MASS=58112] | 1.00         | 7.63 | 2.26 | 0.00 | 2 | 2 | 3 | QC[339]DQFVAEYEPVLIIEILVEVM[147]DPSFVC[339]LK | 1 |
|                                                                                                                                                                                                                                                                             |              |      |      |      |   |   | 2 | GC[339]SFLPDPYQK                              | 1 |
|                                                                                                                                                                                                                                                                             |              |      |      |      |   |   | 2 | GC[330]SFLPDPYQK                              | 1 |
| SATB1_HUMAN (Q01826) DNA-binding protein SATB1 (Special AT-rich sequence-binding protein 1) [MASS=85956]                                                                                                                                                                    | *            | 1.31 | *    | *    | * | 1 | 2 | AKVSQALFAK                                    | 1 |
| SBP1_HUMAN (Q13228) Selenium-binding protein 1 [MASS=52313]                                                                                                                                                                                                                 | 0.25         | 2.33 | 0.18 | 0.00 | 1 | 1 | 2 | EEIVYLPC[330]IYR                              | 1 |

|                                                                                                                                                                                                                                               |      |       |      |      |   |   |   |                                   |   |
|-----------------------------------------------------------------------------------------------------------------------------------------------------------------------------------------------------------------------------------------------|------|-------|------|------|---|---|---|-----------------------------------|---|
| SCN5A_HUMAN (Q14524) Sodium channel protein type 5 subunit alpha (Sodium channel protein type V subunit alpha) (Voltage-gated sodium channel subunit alpha Nav1.5) (Sodium channel protein, cardiac muscle alpha-subunit) (HH1) [MASS=227161] | *    | 0.74  | *    | *    | * | 1 | 2 | WHMM[147]DFFHAFLIIFR              | 1 |
| SCNND_HUMAN (P51172) Amiloride-sensitive sodium channel subunit delta (Epithelial Na+ channel subunit delta) (Delta ENaC) (Nonvoltage-gated sodium channel 1 subunit delta) (SCNED) (Delta NaCH) [MASS=70274]                                 | 0.00 | 3.61  | *    | *    | * | 1 | 3 | VEQQPHLPLLSTLAGIRVM[147]VHGR      | 1 |
| SCOT_HUMAN (P55809) Succinyl-CoA:3-ketoacid-coenzyme A transferase 1, mitochondrial precursor (EC 2.8.3.5) (Somatic-type succinyl CoA:3-oxoacid CoA-transferase) (Scot-S) [MASS=56157]                                                        | 0.36 | 10.19 | 2.02 | 0.00 | 1 | 2 | 2 | DIPDGATVLVGGFGLC[339]GIPENLIDALLK | 1 |
|                                                                                                                                                                                                                                               |      |       |      |      |   |   | 3 | TGVKGLTAVSNAGVDNFGLGLLLR          | 1 |
| SCRN1_HUMAN (Q12765) Secernin-1 [MASS=46382]                                                                                                                                                                                                  | *    | 2.90  | *    | *    | * | 1 | 2 | YWAAEKVTEGVR                      | 1 |
| SDOS_HUMAN (Q9BRJ7) Protein syndesmos (NUDT16-like protein 1) [MASS=23338]                                                                                                                                                                    | 0.00 | 9.48  | 3.03 | 0.00 | 1 | 1 | 3 | FWSLEDGLNRVLGLGLGC[339]LR         | 1 |
| SEM3C_HUMAN (Q99985) Semaphorin-3C precursor (Semaphorin E) (Sema E) [MASS=85207]                                                                                                                                                             | *    | 1.20  | *    | *    | * | 1 | 1 | NHAPITTMK                         | 1 |
|                                                                                                                                                                                                                                               |      |       |      |      |   |   | 3 | IPYPRPGTC[330]PSK                 | 4 |
| SEM3D_HUMAN (O95025) Semaphorin-3D precursor [MASS=89651]                                                                                                                                                                                     | 0.00 | 2.83  | 0.10 | 0.16 | 2 | 2 | 3 | HHRDLDELPR                        | 1 |
|                                                                                                                                                                                                                                               |      |       |      |      |   |   | 3 | ADLLC[339]PGPEHGR                 | 1 |
| SEM4F_HUMAN (O95754) Semaphorin-4F precursor (Semaphorin W) (Sema W) (Semaphorin M) (Sema M) [MASS=83511]                                                                                                                                     | 0.00 | 1.56  | 4.87 | 0.00 | 1 | 1 | 3 | ADLLC[339]PGPEHGR                 | 1 |
| SEM5B_HUMAN (Q9P283) Semaphorin-5B precursor [MASS=119866]                                                                                                                                                                                    | *    | 2.01  | *    | *    | * | 1 | 3 | FC[339]NENTPC[330]PVPIFWASWGSWSK  | 1 |
| SERB_HUMAN (P78330) Phosphoserine phosphatase (EC 3.1.3.3) (PSP) (O-phosphoserine phosphohydrolase) (PSPase) (L-3-phosphoserine phosphatase) [MASS=25008]                                                                                     | *    | 5.78  | *    | *    | * | 1 | 3 | LALIQPSREQVQR                     | 1 |

|                                                                                                                                                                                                                                                                              |      |      |        |      |   |   |                  |                                                                    |                   |
|------------------------------------------------------------------------------------------------------------------------------------------------------------------------------------------------------------------------------------------------------------------------------|------|------|--------|------|---|---|------------------|--------------------------------------------------------------------|-------------------|
| SERC3_HUMAN (Q13530) Serine incorporator 3 (Tumor differentially expressed protein 1) [MASS=52580]                                                                                                                                                                           | 0.00 | 2.33 | 0.93   | 0.00 | 1 | 1 | 2                | KIPGFC[330]EGGFK                                                   | 1                 |
| SETX_HUMAN (Q7Z333) Probable helicase senataxin (EC 3.6.1.-) (SEN1 homolog) [MASS=302951]                                                                                                                                                                                    | 0.00 | 0.45 | 133.12 | 0.00 | 1 | 1 | 3                | EGYQLGQQSLC[339]K                                                  | 2                 |
| SF3A1_HUMAN (Q15459) Splicing factor 3 subunit 1 (Spliceosome-associated protein 114) (SAP 114) (SF3a120) [MASS=88886]                                                                                                                                                       | 0.00 | 4.67 | *      | *    | * | 2 | 3<br>3           | M[147]QEHM[147]RIGLLDPR<br>VPPPPETPMPPPLPPTDQVIVRK                 | 1<br>1            |
| SFTPD_HUMAN (P35247) Pulmonary surfactant-associated protein D precursor (SP-D) (PSP-D) [MASS=37698]                                                                                                                                                                         | 0.00 | 8.53 | 1.05   | 0.00 | 1 | 2 | 1<br>3           | EGPLGK<br>TAGFVKPFTEAQLLC[339]TQAGGQLASPR                          | 1<br>1            |
| SFXN1_HUMAN (Q9H9B4) Sideroflexin-1 (Tricarboxylate carrier protein) (TCC) [MASS=35488]                                                                                                                                                                                      | 0.65 | 5.92 | 1.41   | 0.00 | 1 | 1 | 2                | FVPFAAVAAANC[339]INIPLM[147]R                                      | 1                 |
| SHPS1_HUMAN (P78324) Tyrosine-protein phosphatase non-receptor type substrate 1 precursor (SHP substrate 1) (SHPS-1) (Inhibitory receptor SHPS-1) (Signal-regulatory protein alpha-1) (Sirp-alpha-1) (Sirp-alpha-2) (Sirp-alpha-3) (MyD-1 antigen) (Brain Ig-I) [MASS=54812] | 1.00 | 6.76 | 0.51   | 0.18 | 2 | 2 | 2<br>2           | ATPQHTVSFTC[330]ESHGFSPR<br>LTC[330]QVEHDGQPAVSK                   | 1<br>1            |
| SIDT1_HUMAN (Q9NXL6) SID1 transmembrane family member 1 precursor [MASS=93866]                                                                                                                                                                                               | *    | 3.87 | *      | *    | * | 2 | 3<br>3<br>2<br>3 | KNLEVTIVPSIK<br>TNVAFHFTASPSQPQYFLYK<br>VTTVSELTK<br>GLQLTWLENGNVS | 2<br>1<br>1<br>11 |
| SIRB1_HUMAN (O00241) Signal-regulatory protein beta-1 precursor (SIRP-beta-1) (CD172b antigen) [MASS=43255]                                                                                                                                                                  | 0.00 | 5.78 | *      | *    | * | 2 |                  |                                                                    |                   |
| SIX4_HUMAN (Q9UIU6) Homeobox protein SIX4 (Sine oculis homeobox homolog 4) [MASS=80832]                                                                                                                                                                                      | 0.00 | 2.63 | 0.14   | 0.00 | 1 | 1 | 3                | SKYVLDGMVDTV[330]EDLETDK                                           | 1                 |



|                                                                                                                                                                                                                                                                              |      |      |      |      |   |   |   |                                                     |   |
|------------------------------------------------------------------------------------------------------------------------------------------------------------------------------------------------------------------------------------------------------------------------------|------|------|------|------|---|---|---|-----------------------------------------------------|---|
| SKIV2_HUMAN (Q15477) Helicase SKI2W (EC 3.6.1.-) (Helicase-like protein) (HLP) [MASS=137798]                                                                                                                                                                                 | *    | 0.96 | *    | *    | * | 1 | 3 | VNGEKILEDFSK                                        | 1 |
| SLIT1_HUMAN (O75093) Slit homolog 1 protein precursor (Slit-1) (Multiple epidermal growth factor-like domains 4) [MASS=167924]                                                                                                                                               | *    | 4.89 | *    | *    | * | 4 | 3 | TQM[147]KPGVVPGC[330]EPC[330]RK                     | 1 |
|                                                                                                                                                                                                                                                                              |      |      |      |      |   |   | 2 | GYAIC[339]QTTRPLSWVEC[339]R                         | 1 |
|                                                                                                                                                                                                                                                                              |      |      |      |      |   |   | 3 | VPTC[339]TLSSGSC[330]PAMC[330]JTC[339]SNGIVDC[339]R | 1 |
|                                                                                                                                                                                                                                                                              |      |      |      |      |   |   | 2 | LNNNEISILEATGM[147]FKK                              | 1 |
| SLIT2_HUMAN (O94813) Slit homolog 2 protein precursor (Slit-2) [Contains: Slit homolog 2 protein N-product; Slit homolog 2 protein C-product] [MASS=169869]                                                                                                                  | *    | 0.52 | *    | *    | * | 1 | 1 | SVPRNIPR                                            | 1 |
| SMCA1_HUMAN (P28370) Probable global transcription activator SNF2L1 (EC 3.6.1.-) (ATP-dependent helicase SMARCA1) (SWI/SNF-related matrix-associated actin-dependent regulator of chromatin subfamily A member 1) [MASS=114731]                                              | 0.00 | 0.61 | 6.97 | 0.00 | 1 | 1 | 2 | GYEYC[339]R                                         | 6 |
|                                                                                                                                                                                                                                                                              |      |      |      |      |   |   |   |                                                     |   |
| SMOC1_HUMAN (Q9H4F8) SPARC-related modular calcium-binding protein 1 precursor (Secreted modular calcium-binding protein 1) (SMOC-1) [MASS=48162]                                                                                                                            | *    | 2.76 | *    | *    | * | 1 | 2 | GC[339]LGVSKEGRLV                                   | 1 |
| SMRC1_HUMAN (Q92922) SWI/SNF-related matrix-associated actin-dependent regulator of chromatin subfamily C member 1 (SWI/SNF complex 155 kDa subunit) (BRG1-associated factor 155) [MASS=122752]                                                                              | *    | 1.27 | *    | *    | * | 1 | 2 | AGGALC[330]HILGAAYK                                 | 1 |
| SNX27_HUMAN (Q96L92) Sorting nexin-27 [MASS=50880]                                                                                                                                                                                                                           | 0.00 | 5.52 | 0.56 | 0.00 | 1 | 1 | 3 | WVKIFTPYFNYMHEC[339]FERVFC[339]ELK                  | 1 |
| SNX6_HUMAN (Q9UNH7) Sorting nexin-6 (TRAF4-associated factor 2) [MASS=46648]                                                                                                                                                                                                 | 0.00 | 7.88 | *    | *    | * | 2 | 3 | AINVDLQSDAALQVDISDALSERDK                           | 1 |
|                                                                                                                                                                                                                                                                              |      |      |      |      |   |   | 1 | VSELFDK                                             | 1 |
| SORL_HUMAN (Q92673) Sortilin-related receptor precursor (Sorting protein-related receptor containing LDLR class A repeats) (SorLA) (SorLA-1) (Low-density lipoprotein receptor relative with 11 ligand-binding repeats) (LDLR relative with 11 ligand-binding) [MASS=248440] | *    | 0.27 | *    | *    | * | 1 | 1 | TRGYRK                                              | 1 |

|                                                                                                                                                           |      |      |      |      |   |   |   |                                            |        |
|-----------------------------------------------------------------------------------------------------------------------------------------------------------|------|------|------|------|---|---|---|--------------------------------------------|--------|
| SP110_HUMAN (Q9HB58) Sp110 nuclear body protein (Speckled 110 kDa) (Transcriptional coactivator Sp110) (Interferon-induced protein 41/75) [MASS=78504]    | 0.00 | 1.74 | 0.51 | 0.00 | 1 | 1 | 3 | PKSDTVDFHC[330]SK                          | 1      |
| SPAST_HUMAN (Q9UBP0) Spastin [MASS=67197]                                                                                                                 | *    | 1.46 | *    | *    | * | 1 | 1 | M[147]NSPGGRGK                             | 1      |
| SPON1_HUMAN (Q9HCB6) Spondin-1 precursor (F-spondin) (Vascular smooth muscle cell growth-promoting factor) [MASS=90973]                                   | *    | 1.86 | *    | *    | * | 1 | 2 | LC[330]GGGIQERYM[147]TVKK                  | 1      |
| SPRC_HUMAN (P09486) SPARC precursor (Secreted protein acidic and rich in cysteine) (Osteonectin) (ON) (Basement-membrane protein 40) (BM-40) [MASS=34632] | 0.00 | 4.62 | 0.34 | 0.00 | 1 | 1 | 2 | MRAWIFLLC[330]LAGR                         | 1      |
| SPRE2_HUMAN (Q7Z698) Sprouty-related, EVH1 domain-containing protein 2 (Spred-2) [MASS=47498]                                                             | 0.00 | 7.89 | 0.29 | 0.00 | 1 | 2 | 3 | PC[330]RQVSFPDDDEEIVR<br>2 YDPSEDADSSYVRFK | 1<br>1 |
| SPT6H_HUMAN (Q7KZ85) Transcription elongation factor SPT6 (hSPT6) (Tat-cotransactivator 2 protein) (Tat-CT2 protein) [MASS=199071]                        | 0.00 | 1.62 | 0.34 | 0.00 | 1 | 2 | 2 | DIPKMQNAAKASR<br>3 FSADLTC[330]RTSDLMDR    | 1<br>1 |
| SPTA1_HUMAN (P02549) Spectrin alpha chain, erythrocyte (Erythroid alpha-spectrin) [MASS=279914]                                                           | *    | 0.50 | *    | *    | * | 1 | 1 | ALSNAANLQRFK                               | 1      |
| SPTA2_HUMAN (Q13813) Spectrin alpha chain, brain (Spectrin, non-erythroid alpha chain) (Alpha-II spectrin) (Fodrin alpha chain) [MASS=284537]             | *    | 3.20 | *    | *    | * | 5 | 1 | EFSMMFK                                    | 2      |
|                                                                                                                                                           |      |      |      |      |   |   | 1 | AIEARHASLMK                                | 1      |
|                                                                                                                                                           |      |      |      |      |   |   | 3 | FEFFQTDMAAHEERVNEVNQFAAK                   | 1      |
|                                                                                                                                                           |      |      |      |      |   |   | 2 | HQALQAEIAGHEPR                             | 1      |
|                                                                                                                                                           |      |      |      |      |   |   | 3 | HKRLEAELAAHEPAIQGVLDTGK                    | 1      |
| SPTB1_HUMAN (P11277) Spectrin beta chain, erythrocyte (Beta-I spectrin) [MASS=246189]                                                                     | *    | 0.47 | *    | *    | * | 1 | 1 | EVVQKKTFTK                                 | 1      |
| SPTB2_HUMAN (Q01082) Spectrin beta chain, brain 1 (Spectrin, non-erythroid beta chain 1) (Beta-II spectrin) (Fodrin beta chain) [MASS=274629]             | *    | 0.76 | *    | *    | * | 3 | 1 | EWLDK                                      | 1      |
|                                                                                                                                                           |      |      |      |      |   |   | 1 | HNLLASK                                    | 1      |
|                                                                                                                                                           |      |      |      |      |   |   | 1 | IQDKHK                                     | 1      |

|                                                                                                                                                                                                        |      |      |      |      |   |   |   |                                |   |
|--------------------------------------------------------------------------------------------------------------------------------------------------------------------------------------------------------|------|------|------|------|---|---|---|--------------------------------|---|
| SPTN2_HUMAN (O15020) Spectrin beta chain, brain 2 (Spectrin, non-erythroid beta chain 2) (Beta-III spectrin) [MASS=271293]                                                                             | *    | 1.51 | *    | *    | * | 2 | 2 | RQETAEKWQEK                    | 1 |
|                                                                                                                                                                                                        |      |      |      |      |   |   | 3 | AEEIGRHM[147]QAVAEAWAQLQGSSAAR | 1 |
| SPTN4_HUMAN (Q9H254) Spectrin beta chain, brain 3 (Spectrin, non-erythroid beta chain 3) (Beta-IV spectrin) [MASS=288983]                                                                              | *    | 0.51 | *    | *    | * | 1 | 3 | LQSM[147]ESQVEEWYR             | 1 |
| SSDH_HUMAN (P51649) Succinate semialdehyde dehydrogenase, mitochondrial precursor (EC 1.2.1.24) (NAD(+)-dependent succinic semialdehyde dehydrogenase) [MASS=57214]                                    | *    | 2.06 | *    | *    | * | 1 | 3 | VEKQVNDAVSK                    | 1 |
| ST6B1_HUMAN (Q6IMI4) Sulfotransferase 6B1 (EC 2.8.2.-) [MASS=30511]                                                                                                                                    | 0.00 | 6.42 | 3.99 | 0.00 | 1 | 1 | 3 | KYKYPEFPVLEC[339]GDSEK         | 1 |
| STA13_HUMAN (Q9Y3M8) StAR-related lipid transfer protein 13 (StARD13) (START domain-containing protein 13) (46H23.2) (Deleted in liver cancer protein 2) (Rho GTPase-activating protein) [MASS=124967] | 0.00 | 1.08 | *    | *    | * | 1 | 3 | METLRGKGAHGR                   | 1 |
| STIM2_HUMAN (Q9P246) Stromal interaction molecule 2 precursor [MASS=83971]                                                                                                                             | *    | 1.21 | *    | *    | * | 1 | 2 | HITIEDLWK                      | 1 |
| STON2_HUMAN (Q8WXE9) Stonin-2 (Stoned B) [MASS=101164]                                                                                                                                                 | *    | 1.77 | *    | *    | * | 1 | 3 | VILFNPLDAC[330]RFELM[147]R     | 1 |
| STXB1_HUMAN (P61764) Syntaxin-binding protein 1 (Unc-18 homolog) (Unc-18A) (Unc-18-1) (N-Sec1) (p67) [MASS=67568]                                                                                      | 0.97 | 3.37 | 0.60 | 0.05 | 2 | 1 | 2 | AAHVFFTDSC[330]PDALFNELVK      | 2 |
| STXB4_HUMAN (Q6ZWJ1) Syntaxin-binding protein 4 (Syntaxin 4-interacting protein) (Synip) [MASS=61761]                                                                                                  | 0.00 | 1.81 | 4.89 | 0.00 | 1 | 1 | 2 | SEENEEDC[339]SR                | 1 |
| SUZ12_HUMAN (Q15022) Polycomb protein SUZ12 (Suppressor of zeste 12 protein homolog) (Joined to JAZF1 protein) (Chromatin precipitated E2F target 9 protein) (ChET 9 protein) [MASS=83053]             | *    | 1.49 | *    | *    | * | 1 | 3 | RTPITHILVC[339]R               | 1 |

|   |                     |    |
|---|---------------------|----|
| 2 | VGMHETVLTVTGK       | 1  |
| 3 | RALTGRDSGMEK        | 1  |
| 3 | VQASKNPLKM[147]LAAR | 22 |

SVIL\_HUMAN (O95425) Supervillin (Archvillin)  
(p205/p250) [MASS=247705]    0.00   1.81   \*   \*   \*   3

SYIC\_HUMAN (P41252) Isoleucyl-tRNA  
synthetase, cytoplasmic (EC 6.1.1.5)  
(Isoleucine--tRNA ligase) (IleRS) (IRS)  
[MASS=144958]    0.00   1.66   \*   \*   \*   1   3   WILSFM[147]QSLIGFFETEMAAYR    1

SYIM\_HUMAN (Q9NSE4) Isoleucyl-tRNA  
synthetase, mitochondrial precursor (EC  
6.1.1.5) (Isoleucine--tRNA ligase) (IleRS)  
[MASS=113791]    0.95   3.26   1.40   0.00   1   2   2   SC[339]QTALVEILDVIVR    1  
3   C[339]PRC[330]WKYTAESSDTLC[339]PR    1

SYNE1\_HUMAN (Q8NF91) Nesprin-1 (Nuclear  
envelope spectrin repeat protein 1) (Synaptic  
nuclear envelope protein 1) (Syne-1) (Myocyte  
nuclear envelope protein 1) (Myne-1) (Enaptin)  
[MASS=1011035]    \*   1.46   \*   \*   \*   9   2   EHIC[339]LLPDDVSKQVK    1  
3   GAVALSGDHSALESQIRQLGKALDDSR    1  
2   EMFATM[147]SK    1  
1   FSSM[147]APDLDR    1  
3   QLRQTVEATNSM[147]NKNESDLIEK    1  
2   DKTTMLGK    1  
1   LNALPR    1  
3   ETQFHTELM[147]AQASAVLK    1  
3   KQIEHLIQPLHRDGGK    1

|                                                                                                                                   |      |       |      |      |    |   |   |                                                  |   |
|-----------------------------------------------------------------------------------------------------------------------------------|------|-------|------|------|----|---|---|--------------------------------------------------|---|
| SYPH_HUMAN (P08247) Synaptophysin<br>(Major synaptic vesicle protein p38)<br>[MASS=33845]                                         | 0.97 | 3.83  | 0.69 | 0.00 | 1  | 1 | 2 | LHQVYFDAPTC[330]R                                | 1 |
| T2R38_HUMAN (P59533) Taste receptor type<br>2 member 38 (T2R38) (T2R61) (PTC bitter<br>taste receptor) [MASS=37892]               | 0.00 | 3.30  | 0.85 | 0.00 | 1  | 1 | 2 | ADHKADSR TLC[339]                                | 1 |
|                                                                                                                                   |      |       |      |      |    |   | 2 | SIQFVDWC[330]PTGFK                               | 2 |
|                                                                                                                                   |      |       |      |      |    |   | 3 | TKRSIQFVDWC[339]PTGFK                            | 1 |
| TBA1_HUMAN (P68366) Tubulin alpha-1 chain<br>(Alpha-tubulin 1) (Testis-specific alpha-tubulin)<br>(Tubulin H2-alpha) [MASS=49924] | 1.00 | 13.84 | 0.95 | 0.10 | 11 | 4 | 2 | YMAC[339]C[339]LLYR                              | 1 |
|                                                                                                                                   |      |       |      |      |    |   | 3 | AYHEQLSVAEITNAC[339]FEPANQM[147]VK               | 1 |
|                                                                                                                                   |      |       |      |      |    |   | 2 | YMAC[330]C[330]LLYR                              | 1 |
|                                                                                                                                   |      |       |      |      |    |   | 2 | YM[147]AC[339]C[339]LLYR                         | 2 |
|                                                                                                                                   |      |       |      |      |    |   | 2 | YM[147]AC[330]C[330]LLYR                         | 2 |
| TBA3_HUMAN (Q71U36) Tubulin alpha-3<br>chain (Alpha-tubulin 3) (Tubulin B-alpha-1)<br>[MASS=50135]                                | 1.00 | 7.10  | *    | *    | *  | 1 | 3 | LADQC[330]TGLQGFLVFHSGGGTSGGFTSLLMER             | 1 |
|                                                                                                                                   |      |       |      |      |    |   | 3 | LADQC[339]TGLQGFLVFHSGGGTSGGFTSLLM[147]ER        | 1 |
|                                                                                                                                   |      |       |      |      |    |   | 3 | LTTPTYGDLNHLVSATM[147]SGVTTC[330]LR              | 1 |
|                                                                                                                                   |      |       |      |      |    |   | 2 | LTTPTYGDLNHLVSATM[147]SGVTTC[330]LR              | 1 |
|                                                                                                                                   |      |       |      |      |    |   | 3 | EAESC[330]DC[330]LQGFQLTHSLGGGTGSGM[147]GTLLISK  | 1 |
|                                                                                                                                   |      |       |      |      |    |   | 3 | LTTPTYGDLNHLVSATM[147]SGVTTC[339]LR              | 1 |
|                                                                                                                                   |      |       |      |      |    |   | 2 | TAVC[339]DIPPR                                   | 2 |
| TBB2C_HUMAN (P68371) Tubulin beta-2C<br>chain (Tubulin beta-2 chain) [MASS=49831]                                                 | 1.00 | 22.25 | *    | *    | *  | 4 | 2 | LTTPTYGDLNHLVSATM[147]SGVTTC[339]LR              | 2 |
|                                                                                                                                   |      |       |      |      |    |   | 3 | EAESC[339]DC[339]LQGFQLTHSLGGGTGSGM[147]GTLLISK  | 2 |
|                                                                                                                                   |      |       |      |      |    |   | 1 | TAVC[339]DIPPR                                   | 1 |
|                                                                                                                                   |      |       |      |      |    |   | 3 | KEAESC[339]DC[339]LQGFQLTHSLGGGTGSGM[147]GTLLISK | 1 |
|                                                                                                                                   |      |       |      |      |    |   | 2 | EIVHIQAGQC[339]GNQIGAK                           | 2 |
| TBB2_HUMAN (P07437) Tubulin beta-2 chain<br>[MASS=49671]                                                                          | 1.00 | 7.21  | 1.05 | 0.10 | 16 | 2 | 2 | EIVHIQAGQC[330]GNQIGAK                           | 2 |
|                                                                                                                                   |      |       |      |      |    |   | 2 | ALVPELTQQVFDK                                    | 1 |
|                                                                                                                                   |      |       |      |      |    |   | 1 | TSRELR                                           | 1 |
| TBCD1_HUMAN (Q86TI0) TBC1 domain family<br>member 1 [MASS=133083]                                                                 | 0.41 | 2.65  | 1.46 | 0.00 | 1  | 3 | 2 | HVDHFGFIC[339]R                                  | 1 |
|                                                                                                                                   |      |       |      |      |    |   | 2 | IEGM[147]NSSKTKLELQK                             | 1 |
| TBCD5_HUMAN (Q92609) TBC1 domain<br>family member 5 [MASS=89004]                                                                  | *    | 2.39  | *    | *    | *  | 1 | 3 | LEIAPQIYGLRWVRLLFGR                              | 1 |

|                                                                                                                                                                                     |      |      |      |      |   |   |             |                                                |             |
|-------------------------------------------------------------------------------------------------------------------------------------------------------------------------------------|------|------|------|------|---|---|-------------|------------------------------------------------|-------------|
| TCF20_HUMAN (Q9UGU0) Transcription factor 20 (Stromelysin 1 PDGF-responsive element-binding protein) (SPRE-binding protein) (Nuclear factor SPBP) (AR1) [MASS=211770]               | *    | 0.31 | *    | *    | * | 1 | 1           | VKVRHK                                         | 1           |
| TE2IP_HUMAN (Q9NYB0) Telomeric repeat-binding factor 2-interacting protein 1 (TRF2-interacting telomeric protein Rap1) (hRap1) [MASS=44260]                                         | *    | 3.26 | *    | *    | * | 1 | 2           | FGAQNVARRIEFR                                  | 1           |
| TENX_HUMAN (P22105) Tenascin-X precursor (TN-X) (Hexabrachion-like protein) [MASS=464454]                                                                                           | 0.62 | 0.72 | 0.36 | 0.00 | 1 | 2 | 3<br>3      | VRGEESEVTVGGLEPGC[330]KYK<br>M[147]NLYGLRGRQR  | 1<br>1      |
| TEP1_HUMAN (Q99973) Telomerase protein component 1 (Telomerase-associated protein 1) (Telomerase protein 1) (p240) (p80 telomerase homolog) [MASS=290413]                           | *    | 1.07 | *    | *    | * | 3 | 1<br>3<br>3 | VGISSR<br>TC[339]DADASGTFR<br>LEESPFNNQM[147]R | 1<br>1<br>1 |
| TERA_HUMAN (P55072) Transitional endoplasmic reticulum ATPase (TER ATPase) (15S Mg(2+)-ATPase p97 subunit) (Valosin-containing protein) (VCP) [MASS=89190]                          | 0.55 | 2.11 | 0.58 | 0.00 | 1 | 1 | 2           | QAAPC[330]VLFDELDLSIAK                         | 1           |
| THA_HUMAN (P10827) Thyroid hormone receptor alpha (C-erbA-alpha) (c-erbA-1) (EAR-7) (EAR7) [MASS=54815]                                                                             | 0.00 | 3.47 | 1.21 | 0.00 | 1 | 1 | 2           | KC[339]IAVGMAM[147]DLVLDDSK                    | 1           |
| THIK_HUMAN (P09110) 3-ketoacyl-CoA thiolase, peroxisomal precursor (EC 2.3.1.16) (Beta-ketothiolase) (Acetyl-CoA acyltransferase) (Peroxisomal 3-oxoacyl-CoA thiolase) [MASS=44292] | *    | 5.42 | *    | *    | * | 1 | 3           | DGSTTAGNSSQVSDGAAAILLAR                        | 1           |
| THIL_HUMAN (P24752) Acetyl-CoA acetyltransferase, mitochondrial precursor (EC 2.3.1.9) (Acetoacetyl-CoA thiolase) (T2) [MASS=45199]                                                 | 0.00 | 4.22 | 2.15 | 0.00 | 1 | 1 | 3           | IHMGC[339]AENTAKKLNAR                          | 1           |
| THY1_HUMAN (P04216) Thy-1 membrane glycoprotein precursor (Thy-1 antigen) (CD90 antigen) (CDw90 antigen) [MASS=17935]                                                               | 0.91 | 8.70 | 0.55 | 0.00 | 1 | 1 | 2           | VTSLTAC[330]LVDQSLR                            | 1           |
| THYG_HUMAN (P01266) Thyroglobulin precursor [MASS=304731]                                                                                                                           | 0.00 | 1.05 | *    | *    | * | 1 | 3           | AVLMGGSALSPAAVISHERAQQQAIALAK                  | 1           |

|                                                                                                                                                                                                                                                    |      |      |       |      |   |   |        |                                            |        |
|----------------------------------------------------------------------------------------------------------------------------------------------------------------------------------------------------------------------------------------------------|------|------|-------|------|---|---|--------|--------------------------------------------|--------|
| TIAM1_HUMAN (Q13009) T-lymphoma invasion and metastasis-inducing protein 1 (TIAM-1 protein) [MASS=177637]                                                                                                                                          | *    | 0.69 | *     | *    | * | 1 | 2      | LSIYEDWDPFR                                | 1      |
| TLK2_HUMAN (Q86UE8) Serine/threonine-protein kinase tousled-like 2 (EC 2.7.11.1) (Tousled-like kinase 2) (PKU-alpha) [MASS=87660]                                                                                                                  | 0.00 | 1.42 | 13.60 | 0.00 | 1 | 1 | 3      | MAC[339]RDKSM[147]QDR                      | 2      |
| TLN2_HUMAN (Q9Y4G6) Talin-2 [MASS=271553]                                                                                                                                                                                                          | 0.00 | 0.90 | 0.57  | 0.00 | 1 | 2 | 2<br>3 | AC[330]QAATTDSELLK<br>HTSALC[330]NAC[339]R | 1<br>1 |
| TM11D_HUMAN (O60235) Transmembrane protease, serine 11D precursor (EC 3.4.21.-) (Airway trypsin-like protease) [Contains: Transmembrane protease, serine 11D non-catalytic chain; Transmembrane protease, serine 11D catalytic chain] [MASS=46263] | 0.00 | 4.31 | *     | *    | * | 1 | 3      | DWIATSGISTTFPKLRM[147]R                    | 1      |
| TMPS7_HUMAN (Q7RTY8) Transmembrane protease, serine 7 precursor (EC 3.4.21.-) [MASS=64041]                                                                                                                                                         | 0.00 | 4.20 | 14.24 | 0.00 | 1 | 2 | 3<br>3 | M[147]LC[339]AGIM[147]SGKR<br>ISSPYPSYPPK  | 1<br>1 |
| TMPS9_HUMAN (Q7Z410) Transmembrane protease, serine 9 (EC 3.4.21.-) (Polyserase-1) (Polyserase-I) (Polyserine protease 1) [Contains: Serase-1; Serase-2; Serase-3] [MASS=114020]                                                                   | *    | 2.93 | *     | *    | * | 2 | 3<br>2 | WVAYVGATYLSGSEASTVR<br>EDFLVKPEVLQK        | 1<br>1 |
| TNR8_HUMAN (P28908) Tumor necrosis factor receptor superfamily member 8 precursor (CD30L receptor) (Lymphocyte activation antigen CD30) (KI-1 antigen) [MASS=63747]                                                                                | *    | 3.70 | *     | *    | * | 1 | 3      | AFPQDRPFEDTC[339]HGPNPSHYDK                | 1      |
| TOM70_HUMAN (O94826) Mitochondrial precursor proteins import receptor (Translocase of outer membrane TOM70) [MASS=67454]                                                                                                                           | 0.92 | 4.28 | 1.67  | 0.00 | 1 | 2 | 2<br>2 | ILLDQVEEAVADFDEC[330]IR<br>YGLKPPTL        | 1<br>1 |
| TOP1_HUMAN (P11387) DNA topoisomerase 1 (EC 5.99.1.2) (DNA topoisomerase I) [MASS=90725]                                                                                                                                                           | *    | 0.78 | *     | *    | * | 1 | 1      | HKEHKK                                     | 1      |
| TP53B_HUMAN (Q12888) Tumor suppressor p53-binding protein 1 (p53-binding protein 1) (p53BP1) (53BP1) [MASS=213573]                                                                                                                                 | *    | 0.35 | *     | *    | * | 1 | 1      | SPAKRGR                                    | 2      |

|                                                                                                                                                                                                                                                            |      |      |       |      |   |   |        |                                                  |        |
|------------------------------------------------------------------------------------------------------------------------------------------------------------------------------------------------------------------------------------------------------------|------|------|-------|------|---|---|--------|--------------------------------------------------|--------|
| TPA_HUMAN (P00750) Tissue-type plasminogen activator precursor (EC 3.4.21.68) (tPA) (t-PA) (t-plasminogen activator) (Alteplase) (Reteplase) [Contains: Tissue-type plasminogen activator chain A; Tissue-type plasminogen activator chain B] [MASS=62917] | 0.00 | 1.96 | 29.92 | 0.00 | 1 | 1 | 3      | RGARSYQVIC[339]R                                 | 6      |
| TR11B_HUMAN (O00300) Tumor necrosis factor receptor superfamily member 11B precursor (Osteoprotegerin) (Osteoclastogenesis inhibitory factor) [MASS=46040]                                                                                                 | 0.00 | 4.49 | 1.31  | 0.00 | 1 | 1 | 2      | GNATHDNIC[339]SGNSESTQK                          | 1      |
| TRABD_HUMAN (Q9UGI0) Protein TRABID (Zinc finger Ran-binding domain-containing protein 1) [MASS=80907]                                                                                                                                                     | *    | 1.13 | *     | *    | * | 1 | 1      | SGSSDVGR                                         | 1      |
| TREM2_HUMAN (Q9NZC2) Triggering receptor expressed on myeloid cells 2 precursor (Triggering receptor expressed on monocytes 2) (TREM-2) [MASS=25447]                                                                                                       | 0.00 | 8.70 | 0.90  | 0.00 | 1 | 1 | 3      | GPC[330]QRVVSTHNLWLLSFLRR                        | 1      |
| TREX2_HUMAN (Q9BQ50) Three prime repair exonuclease 2 (EC 3.1.11.2) (3'-5' exonuclease TREX2) [MASS=30621]                                                                                                                                                 | 0.00 | 6.81 | 3.43  | 0.00 | 1 | 1 | 3      | AGSPLPRSSWPRM[147]DDC[339]GSR                    | 1      |
| TRI11_HUMAN (Q96F44) Tripartite motif-containing protein 11 (EC 6.3.2.-) (RING finger protein 92) (Protein BIA1) [MASS=52774]                                                                                                                              | 0.00 | 4.27 | 1.33  | 0.00 | 1 | 1 | 3      | EPLAAFC[339]GDELRLLC[339]AAC[339]ER              | 1      |
| TRI29_HUMAN (Q14134) Tripartite motif-containing protein 29 (Ataxia-telangiectasia group D-associated protein) [MASS=65806]                                                                                                                                | 0.00 | 1.02 | 22.86 | 0.00 | 1 | 1 | 2      | C[339]PVHGK                                      | 2      |
| TRI37_HUMAN (O94972) Tripartite motif-containing protein 37 (Mulibrey nanism protein) [MASS=107905]                                                                                                                                                        | *    | 4.05 | *     | *    | * | 2 | 3<br>3 | ADPVYSPPLQVSGLC[330]WRLK<br>SELISKSSEILMMFQQVHRK | 1<br>1 |
| TRI54_HUMAN (Q9BYV2) Tripartite motif-containing protein 54 (Muscle-specific RING finger protein 3) (MuRF3) (MURF-3) (Muscle-specific RING finger protein) (MuRF) (RING finger protein 30) [MASS=40328]                                                    | 0.00 | 8.38 | *     | *    | * | 2 | 3<br>3 | NELSDGIAMLVAGNDR<br>PLLGDAHSMNLEK                | 1<br>1 |



|                                                                                                                                                                                                                                                                             |      |      |      |      |   |   |   |                                                  |   |
|-----------------------------------------------------------------------------------------------------------------------------------------------------------------------------------------------------------------------------------------------------------------------------|------|------|------|------|---|---|---|--------------------------------------------------|---|
| TRI56_HUMAN (Q9BRZ2) Tripartite motif-containing protein 56 (RING finger protein 109) [MASS=81487]                                                                                                                                                                          | *    | 0.79 | *    | *    | * | 1 | 1 | GGRPKNK                                          | 1 |
| TRIM3_HUMAN (O75382) Tripartite motif-containing protein 3 (RING finger protein 22) (Brain-expressed RING finger protein) (RING finger protein 97) [MASS=80836]                                                                                                             | 0.00 | 3.23 | 0.22 | 0.00 | 1 | 1 | 3 | EDSPGPEVQPMQKFLVC[330]SIC[330]LDR                | 1 |
| TRIM9_HUMAN (Q9C026) Tripartite motif-containing protein 9 (RING finger protein 91) [MASS=79177]                                                                                                                                                                            | 0.00 | 5.07 | 1.74 | 0.00 | 1 | 2 | 3 | SWFM[147]HNNSHTNR                                | 2 |
|                                                                                                                                                                                                                                                                             |      |      |      |      |   |   | 3 | EVYVGKETM[147]C[339]TVDGLHFNSTYNAR               | 1 |
| TRPM3_HUMAN (Q9HCF6) Transient receptor potential cation channel subfamily M member 3 (Long transient receptor potential channel 3) (LTrpC3) (Melastatin-2) (MLSN2) [MASS=197529]                                                                                           | 0.00 | 0.64 | *    | *    | * | 1 | 3 | LLGM[147]EDDIPLR                                 | 1 |
| TRPV4_HUMAN (Q9HBA0) Transient receptor potential cation channel subfamily V member 4 (TrpV4) (osm-9-like TRP channel 4) (OTRPC4) (Vanilloid receptor-like channel 2) (Vanilloid receptor-like protein 2) (VRL-2) (Vanilloid receptor-related osmotically-acti [MASS=98281] | 0.22 | 3.56 | 1.35 | 0.00 | 1 | 2 | 2 | AFRSGEM[147]VTVGKSSDGTDPDR                       | 1 |
|                                                                                                                                                                                                                                                                             |      |      |      |      |   |   | 2 | MYDLLLLKC[339]AR                                 | 1 |
| TSKS_HUMAN (Q9UJT2) Testis-specific serine kinase substrate (Testis-specific kinase substrate) (STK22 substrate 1) [MASS=65050]                                                                                                                                             | *    | 1.35 | *    | *    | * | 1 | 1 | LLGGLGGR                                         | 2 |
| TSSK3_HUMAN (Q96PN8) Testis-specific serine/threonine-protein kinase 3 (EC 2.7.11.1) (TSSK-3) (Testis-specific kinase 3) (TSK-3) (Serine/threonine-protein kinase 22C) [MASS=30102]                                                                                         | 0.00 | 7.46 | 2.61 | 0.00 | 1 | 1 | 3 | C[339]ENALLQGFNLKLTDFGFAK                        | 1 |
| TTC15_HUMAN (Q8WVT3) Tetratricopeptide repeat protein 15 (TPR repeat protein 15) [MASS=79361]                                                                                                                                                                               | 0.00 | 3.67 | 0.60 | 0.00 | 1 | 1 | 3 | VM[147]YSM[147]ANC[330]LLLM[147]KDYVLAVDAYHSHVIK | 1 |
| UB2Q2_HUMAN (Q8WVN8) Ubiquitin-conjugating enzyme E2 Q2 (EC 6.3.2.19) (Ubiquitin-protein ligase Q2) (Ubiquitin carrier protein Q2) [MASS=42818]                                                                                                                             | 0.00 | 7.47 | *    | *    | * | 1 | 3 | VQFGANKNQYNLARAQQSYNSIVQIHEK                     | 1 |
| UBN1_HUMAN (Q9NPG3) Ubinuclein (Ubiquitously expressed nuclear protein) (VT4) [MASS=121540]                                                                                                                                                                                 | 0.32 | 3.44 | 0.47 | 0.00 | 1 | 3 | 1 | KVM[147]APSKIK                                   | 1 |
|                                                                                                                                                                                                                                                                             |      |      |      |      |   |   | 3 | TPASSSSALSHPAK                                   | 1 |
|                                                                                                                                                                                                                                                                             |      |      |      |      |   |   | 3 | C[330]PEFFYPELVKNIRGK                            | 1 |

|                                                                                                                                                                                                                |      |      |      |      |   |   |             |                                                                   |             |
|----------------------------------------------------------------------------------------------------------------------------------------------------------------------------------------------------------------|------|------|------|------|---|---|-------------|-------------------------------------------------------------------|-------------|
| UBP11_HUMAN (P51784) Ubiquitin carboxyl-terminal hydrolase 11 (EC 3.1.2.15) (Ubiquitin thioesterase 11) (Ubiquitin-specific-processing protease 11) (Deubiquitinating enzyme 11) [MASS=105030]                 | *    | 2.83 | *    | *    | * | 2 | 3           | NDSVIVDTFHGLFK<br>PNSDDEDDGDEK                                    | 1<br>1      |
| UBP37_HUMAN (Q86T82) Ubiquitin carboxyl-terminal hydrolase 37 (EC 3.1.2.15) (Ubiquitin thioesterase 37) (Ubiquitin-specific-processing protease 37) (Deubiquitinating enzyme 37) [MASS=110100]                 | *    | 1.12 | *    | *    | * | 1 | 3           | QLSLKQSEENR                                                       | 1           |
| UBQL1_HUMAN (Q9UMX0) Ubiquilin-1 (Protein linking IAP with cytoskeleton 1) (PLIC-1) (hPLIC-1) [MASS=62519]                                                                                                     | 0.00 | 2.72 | *    | *    | * | 1 | 3           | SHTDQLVLIFAGKILK                                                  | 1           |
| UBXD6_HUMAN (O00124) UBX domain-containing protein 6 (Rep-8 protein) (Reproduction 8 protein) [MASS=30541]                                                                                                     | 0.26 | 2.96 | 1.64 | 0.00 | 1 | 1 | 2           | C[339]PSGNVLR                                                     | 1           |
| UGGG1_HUMAN (Q9NYU2) UDP-glucose:glycoprotein glucosyltransferase 1 precursor (EC 2.4.1.-) (UDP-glucose ceramide glucosyltransferase-like 1) (UDP--Glc:glycoprotein glucosyltransferase) (HUGT1) [MASS=174976] | *    | 1.70 | *    | *    | * | 1 | 3           | EARGYYEQTGVGPLPVVLFNGMPFER                                        | 1           |
| ULK1_HUMAN (O75385) Serine/threonine-protein kinase ULK1 (EC 2.7.11.1) (Unc-51-like kinase 1) [MASS=112601]                                                                                                    | 0.00 | 1.33 | *    | *    | * | 1 | 3           | NLAKSQTLGKEIK                                                     | 2           |
| UN13B_HUMAN (O14795) Unc-13 homolog B (Munc13-2) (munc13) [MASS=180683]                                                                                                                                        | *    | 0.38 | *    | *    | * | 1 | 1           | SHVYKK                                                            | 1           |
| UNC5C_HUMAN (O95185) Netrin receptor UNC5C precursor (Unc-5 homolog C) (Unc-5 homolog 3) [MASS=103101]                                                                                                         | *    | 0.97 | *    | *    | * | 1 | 3           | C[339]NSEVWHQK                                                    | 1           |
| UQCR1_HUMAN (P31930) Ubiquinol-cytochrome-c reductase complex core protein I, mitochondrial precursor (EC 1.10.2.2) [MASS=52645]                                                                               | 1.00 | 2.50 | 2.10 | 0.02 | 3 | 1 | 2<br>2      | LC[339]TSATESEVAR<br>LC[330]TSATESEVAR                            | 1<br>2      |
| UQCR2_HUMAN (P22695) Ubiquinol-cytochrome-c reductase complex core protein 2, mitochondrial precursor (EC 1.10.2.2) (Complex III subunit II) [MASS=48443]                                                      | 1.00 | 5.30 | 0.82 | 0.41 | 4 | 2 | 2<br>2<br>2 | ENM[147]AYTVEC[339]LR<br>NALANPLYC[330]PDYR<br>NALANPLYC[339]PDYR | 1<br>1<br>2 |

|                                                                                                                                                                                                                        |      |      |      |      |   |   |   |                                               |   |
|------------------------------------------------------------------------------------------------------------------------------------------------------------------------------------------------------------------------|------|------|------|------|---|---|---|-----------------------------------------------|---|
| USH2A_HUMAN (O75445) Usherin precursor (Usher syndrome type-2A protein) (Usher syndrome type IIa protein) [MASS=575597]                                                                                                | *    | 0.46 | *    | *    | * | 2 | 3 | QVGADPSAIDVC[339]K                            | 1 |
|                                                                                                                                                                                                                        |      |      |      |      |   |   | 2 | LVQDQSDELIC[339]K                             | 1 |
| V1AR_HUMAN (P37288) Vasopressin V1a receptor (V1aR) (Vascular/hepatic-type arginine vasopressin receptor) (Antidiuretic hormone receptor 1a) (AVPR V1a) [MASS=46799]                                                   | 0.00 | 7.18 | 1.01 | 0.00 | 1 | 1 | 3 | HLQVFGM[147]FASAYMLVVM[147]TADRYIAVC[330]HPLK | 1 |
| VATA1_HUMAN (P38606) Vacuolar ATP synthase catalytic subunit A, ubiquitous isoform (EC 3.6.3.14) (V-ATPase subunit A 1) (Vacuolar proton pump alpha subunit 1) (V-ATPase 69 kDa subunit 1) (Isoform VA68) [MASS=68304] | 0.00 | 3.73 | 0.06 | 0.00 | 1 | 1 | 3 | FC[330]PFYKTVGMLSNMIAFYDMARR                  | 1 |
| VATB1_HUMAN (P15313) Vacuolar ATP synthase subunit B, kidney isoform (EC 3.6.3.14) (V-ATPase B1 subunit) (Vacuolar proton pump B isoform 1) (Endomembrane proton pump 58 kDa subunit) [MASS=56980]                     | *    | 2.92 | *    | *    | * | 1 | 3 | PGGLPGSSC[339]NLGAAR                          | 1 |
| VATB2_HUMAN (P21281) Vacuolar ATP synthase subunit B, brain isoform (EC 3.6.3.14) (V-ATPase B2 subunit) (Vacuolar proton pump B isoform 2) (Endomembrane proton pump 58 kDa subunit) (HO57) [MASS=56500]               | *    | 2.94 | *    | *    | * | 1 | 3 | EQALAVSRNYLSQPR                               | 1 |
| VDAC1_HUMAN (P21796) Voltage-dependent anion-selective channel protein 1 (VDAC-1) (hVDAC1) (Outer mitochondrial membrane protein porin 1) (Plasmalemmal porin) (Porin 31HL) (Porin 31HM) [MASS=30641]                  | 1.00 | 4.26 | 1.99 | 0.03 | 3 | 1 | 2 | YQIDPDAC[339]FSAK                             | 2 |
|                                                                                                                                                                                                                        |      |      |      |      |   |   | 2 | YQIDPDAC[330]FSAK                             | 1 |
| VDAC2_HUMAN (P45880) Voltage-dependent anion-selective channel protein 2 (VDAC-2) (hVDAC2) (Outer mitochondrial membrane protein porin 2) [MASS=38092]                                                                 | 1.00 | 5.48 | 1.90 | 0.01 | 3 | 1 | 2 | SC[330]SGVEFSTSGSSNTDTGK                      | 1 |
|                                                                                                                                                                                                                        |      |      |      |      |   |   | 2 | SC[339]SGVEFSTSGSSNTDTGK                      | 2 |
| VILI_HUMAN (P09327) Villin-1 [MASS=92563]                                                                                                                                                                              | 0.00 | 3.51 | *    | *    | * | 1 | 3 | TEKQVVVEGQEPANFWMALGGKAPYANTK                 | 1 |

|                                                                                                                                                             |      |      |       |      |   |   |   |                                            |   |
|-------------------------------------------------------------------------------------------------------------------------------------------------------------|------|------|-------|------|---|---|---|--------------------------------------------|---|
| VINC_HUMAN (P18206) Vinculin (Metavinculin) [MASS=123667]                                                                                                   | 0.00 | 5.30 | *     | *    | * | 4 | 2 | IRTNLLQVC[330]ER                           | 1 |
|                                                                                                                                                             |      |      |       |      |   |   | 1 | ATM[147]LGR                                | 1 |
|                                                                                                                                                             |      |      |       |      |   |   | 3 | AVAGNISDPGLQKSFLDSGYRILGAVAK               | 1 |
|                                                                                                                                                             |      |      |       |      |   |   | 3 | NPGNQAAAYEHFETM[147]K                      | 1 |
| VISL1_HUMAN (P62760) Visinin-like protein 1 (VILIP) (Hippocalcin-like protein 3) (HLP3) [MASS=22011]                                                        | 0.30 | 7.89 | 1.13  | 0.00 | 1 | 1 | 2 | SDPSIVLLLQC[330]DIQK                       | 1 |
| VPS11_HUMAN (Q9H270) Vacuolar protein sorting 11 (hVPS11) (RING finger protein 108) [MASS=107836]                                                           | 0.00 | 1.17 | 13.05 | 0.00 | 1 | 1 | 3 | VELDTHGC[339]GLR                           | 1 |
| VWF_HUMAN (P04275) Von Willebrand factor precursor (vWF) [Contains: Von Willebrand antigen II] [MASS=309298]                                                | 0.00 | 2.28 | 0.86  | 0.00 | 1 | 3 | 3 | TEPMQVALHC[339]TNGSVVYHEVLNAM[147]EC[330]K | 1 |
|                                                                                                                                                             |      |      |       |      |   |   | 2 | GC[330]SHPSVKC[330]K                       | 1 |
|                                                                                                                                                             |      |      |       |      |   |   | 3 | M[147]IPARFAGVLLALALILPGTLC[330]AEGTR      | 1 |
| WDR69_HUMAN (Q8N136) WD repeat protein 69 [MASS=45777]                                                                                                      | *    | 2.41 | *     | *    | * | 1 | 2 | LEGHEGEISK                                 | 1 |
|                                                                                                                                                             |      |      |       |      |   |   | 2 | FFYGC[339]R                                | 6 |
| WDR7_HUMAN (Q9Y4E6) WD repeat protein 7 (TGF-beta resistance-associated protein TRAG) (Rabconnectin-3 beta) [MASS=163809]                                   | 0.32 | 0.40 | 27.22 | 0.01 | 3 | 1 |   |                                            |   |
| WFDC1_HUMAN (Q9HC57) WAP four-disulfide core domain protein 1 precursor (Prostate stromal protein ps20) (ps20 growth inhibitor) [MASS=23976]                | 0.00 | 4.09 | 0.47  | 0.00 | 1 | 1 | 2 | C[339]QADSEC[339]PR                        | 1 |
| WNK3_HUMAN (Q9BYP7) Serine/threonine-protein kinase WNK3 (EC 2.7.11.1) (Protein kinase with no lysine 3) (Protein kinase, lysine-deficient 3) [MASS=191788] | *    | 1.03 | *     | *    | * | 2 | 2 | VDKLPSNVLR                                 | 1 |
|                                                                                                                                                             |      |      |       |      |   |   | 1 | GAFKTVYK                                   | 1 |
| YLPM1_HUMAN (P49750) YLP motif-containing protein 1 (Nuclear protein ZAP3) (ZAP113) [MASS=219984]                                                           | *    | 0.36 | *     | *    | * | 1 | 1 | KGPVVAK                                    | 3 |
| YYY1_HUMAN (P49646) Very very hypothetical protein RMSA-1 [MASS=48240]                                                                                      | 0.23 | 5.02 | *     | *    | * | 1 | 3 | ERFTSLILLNNM[147]HQMIFPM[147]VK            | 1 |
| ZBT10_HUMAN (Q96DT7) Zinc finger and BTB domain-containing protein 10 (Zinc finger protein RIN ZF) [MASS=92444]                                             | 0.00 | 2.01 | 5.52  | 0.00 | 1 | 1 | 3 | LQC[339]SFQTSWLKDFPWLK                     | 1 |
| ZBTB9_HUMAN (Q96C00) Zinc finger and BTB domain-containing protein 9 [MASS=50602]                                                                           | 0.00 | 4.44 | 7.68  | 0.00 | 1 | 1 | 3 | METPTPLPPVPASPTC[339]NPAPR                 | 1 |

|                                                                                                                                                                                                                                                                             |      |      |      |      |   |   |                                                                                   |                          |   |
|-----------------------------------------------------------------------------------------------------------------------------------------------------------------------------------------------------------------------------------------------------------------------------|------|------|------|------|---|---|-----------------------------------------------------------------------------------|--------------------------|---|
| ZCHC8_HUMAN (Q6NZY4) Zinc finger CCHC domain-containing protein 8 [MASS=78577]                                                                                                                                                                                              | 0.00 | 2.69 | 0.59 | 0.00 | 1 | 1 | 3                                                                                 | SEAGHASSPDSEVTSLC[330]QK | 1 |
| ZEP1_HUMAN (P15822) Zinc finger protein 40 (Human immunodeficiency virus type I enhancer-binding protein 1) (HIV-EP1) (Major histocompatibility complex-binding protein 1) (MBP-1) (Positive regulatory domain II-binding factor 1) (PRDII-BF1) [MASS=297217]               | 0.00 | 2.28 | 3.35 | 0.00 | 1 | 3 | 3 KC[339]VDLGISVGLIDEQDTEESDEK<br>3 DLQVTNVQPLSANMSQGGVSRLETNENSHQK<br>2 KIPKSPLR | 1<br>1<br>1              |   |
| ZFP1_HUMAN (Q6P2D0) Zinc finger protein 1 homolog (Zfp-1) [MASS=47516]                                                                                                                                                                                                      | 0.00 | 5.16 | 0.31 | 0.00 | 1 | 1 | 3 SYAGKQTDEC[330]NEFGKALLYLK                                                      | 1                        |   |
| ZFY28_HUMAN (Q9HCC9) Zinc finger FYVE domain-containing protein 28 [MASS=96500]                                                                                                                                                                                             | *    | 0.79 | *    | *    | * | 1 | 1 MM[147]NRFRK                                                                    | 1                        |   |
| ZFYV9_HUMAN (O95405) Zinc finger FYVE domain-containing protein 9 (Mothers against decapentaplegic homolog-interacting protein) (Madh-interacting protein) (Smad anchor for receptor activation) (Receptor activation anchor) (hSARA) (Novel serine protease) [MASS=156402] | *    | 0.98 | *    | *    | * | 1 | 2 KQENYIPDEDLTGK                                                                  | 1                        |   |
| ZIMP7_HUMAN (Q8NF64) PIAS-like protein Zimp7 [MASS=96536]                                                                                                                                                                                                                   | *    | 3.37 | *    | *    | * | 1 | 3 GPSVPAGMNPTGIGGVM[147]GPSGLSPLAMNPTR                                            | 1                        |   |
| ZN141_HUMAN (Q15928) Zinc finger protein 141 [MASS=55249]                                                                                                                                                                                                                   | 0.00 | 4.43 | 0.27 | 0.00 | 1 | 2 | 3 C[330]LDPDQQNLYR<br>3 TRHTGEKHFK                                                | 1<br>1                   |   |
| ZN142_HUMAN (P52746) Zinc finger protein 142 (HA4654) [MASS=187865]                                                                                                                                                                                                         | *    | 0.47 | *    | *    | * | 1 | 2 THMC[339]PEC[339]K                                                              | 1                        |   |
| ZN177_HUMAN (Q13360) Zinc finger protein 177 [MASS=36369]                                                                                                                                                                                                                   | 0.00 | 9.35 | 1.32 | 0.00 | 1 | 3 | 3 THTGEKPYDC[330]KEC[330]GK<br>2 C[339]IQC[339]EK<br>2 HM[147]RSHTGEK             | 1<br>1<br>1              |   |
| ZN236_HUMAN (Q9UL36) Zinc finger protein 236 [MASS=203659]                                                                                                                                                                                                                  | *    | 1.25 | *    | *    | * | 2 | 1 HMATHM[147]SMK<br>3 KTHIASHFKHTELR<br>1 HM[147]ATHMSMK                          | 1<br>1<br>1              |   |
| ZN239_HUMAN (Q16600) Zinc finger protein 239 (Zinc finger protein MOK-2) (HOK-2) [MASS=51530]                                                                                                                                                                               | 0.00 | 3.28 | 1.25 | 0.00 | 1 | 1 | 2 KVIKGESC[339]SENLQVK                                                            | 1                        |   |
| ZN257_HUMAN (Q9Y2Q1) Zinc finger protein 257 (Bone marrow zinc finger 4) (BMZF-4) [MASS=62348]                                                                                                                                                                              | 0.00 | 3.93 | *    | *    | * | 1 | 3 YDEC[330]C[339]KAFKWSSALTTLTQHK                                                 | 1                        |   |

|                                                                                      |      |      |      |      |   |   |   |                                            |    |
|--------------------------------------------------------------------------------------|------|------|------|------|---|---|---|--------------------------------------------|----|
| ZN273_HUMAN (Q14593) Zinc finger protein 273 (Zinc finger protein HZF9) [MASS=58045] | 0.00 | 3.17 | 0.98 | 0.00 | 1 | 1 | 3 | C[339]EDC[339]GKVFSVFSVLTK                 | 1  |
| ZN407_HUMAN (Q9C0G0) Zinc finger protein 407 (Fragment) [MASS=126979]                | 0.00 | 1.55 | 0.06 | 0.00 | 1 | 1 | 3 | M[147]YNC[330]PKC[330]DYGTVNPVEFR          | 1  |
| ZN446_HUMAN (Q9NWS9) Zinc finger protein 446 [MASS=48957]                            | 0.00 | 9.56 | 0.51 | 0.00 | 1 | 2 | 2 | LRELC[339]C[330]QWLQPEAHSK                 | 1  |
|                                                                                      |      |      |      |      |   |   | 3 | SLTGPRSYPC[330]EEC[330]GC[330]SFSWKSQVLVHR | 1  |
| ZN462_HUMAN (Q96JM2) Zinc finger protein 462 [MASS=161529]                           | *    | 2.27 | *    | *    | * | 3 | 1 | QKYADGAFADFK                               | 1  |
|                                                                                      |      |      |      |      |   |   | 3 | IVSLLSSHSHSSQK                             | 1  |
|                                                                                      |      |      |      |      |   |   | 1 | HRDFK                                      | 1  |
| ZN497_HUMAN (Q6ZNH5) Zinc finger protein 497 [MASS=54712]                            | 0.00 | 2.21 | 0.77 | 0.00 | 1 | 1 | 2 | VHTGARPHAC[339]R                           | 1  |
| ZN570_HUMAN (Q96NI8) Zinc finger protein 570 [MASS=62330]                            | 0.00 | 4.29 | *    | *    | * | 1 | 3 | RELTKGLC[330]SGWEPIIC[339]ETEELTPK         | 1  |
| ZN596_HUMAN (Q8TC21) Zinc finger protein 596 [MASS=57907]                            | 0.00 | 3.61 | 0.85 | 0.00 | 1 | 1 | 3 | HERTHTGEKPYGC[330]HLC[330]GK               | 1  |
|                                                                                      |      |      |      |      |   |   | 3 | QYKC[330]DVC[339]GKLFNHK                   | 1  |
|                                                                                      |      |      |      |      |   |   | 3 | VFSC[339]GSTLETHK                          | 21 |
| ZN600_HUMAN (Q6ZNG1) Zinc finger protein 600 [MASS=83157]                            | 0.00 | 3.60 | 7.08 | 0.02 | 5 | 2 |   |                                            |    |
| ZN605_HUMAN (Q86T29) Zinc finger protein 605 [MASS=74376]                            | 0.00 | 2.18 | *    | *    | * | 1 | 3 | PQLLRHQRIHTGEK                             | 2  |

|                                                                                      |      |      |      |      |   |   |   |                       |   |
|--------------------------------------------------------------------------------------|------|------|------|------|---|---|---|-----------------------|---|
| ZNF20_HUMAN (P17024) Zinc finger protein 20 (Zinc finger protein KOX13) [MASS=61567] | 0.00 | 7.33 | 2.72 | 0.00 | 1 | 3 | 1 | NLTSVGK               | 2 |
|                                                                                      |      |      |      |      |   |   | 2 | EC[339]GNAFSFPSEIRRHK | 1 |
|                                                                                      |      |      |      |      |   |   | 3 | HC[339]GKAFISNYIRYHER | 1 |
| ZSWM4_HUMAN (Q9H7M6) Zinc finger SWIM domain-containing protein 4 [MASS=110167]      | 0.00 | 2.02 | *    | *    | * | 1 | 3 | DSNGARMLILMTEQFLQDTR  | 1 |

## Table 9. EAD Mitochondrial Study

### Experiment 3

A = Protein Score  
B = Percent Coverage  
C = XPress H2L Ratio  
D = XPress Std. Dev.

E = XPress Peptides  
F = Unique Peptides  
G = Charge  
H = Instances

| Description                                                                                                                                                                                                                                                         | A                           | B     | C    | D    | E | F | G | Peptide Sequence                    | H |
|---------------------------------------------------------------------------------------------------------------------------------------------------------------------------------------------------------------------------------------------------------------------|-----------------------------|-------|------|------|---|---|---|-------------------------------------|---|
| 1433E_HUMAN (P62258) 14-3-3 protein epsilon (14-3-3E) [MASS=29174]                                                                                                                                                                                                  | 1.00                        | 14.12 | 0.81 | 0.02 | 3 | 2 | 2 | LIC[330]C[330]DILDVLDK              | 1 |
|                                                                                                                                                                                                                                                                     |                             |       |      |      |   |   | 3 | LIC[339]C[339]DILDVLDKHLIPAANTGESK  | 1 |
|                                                                                                                                                                                                                                                                     |                             |       |      |      |   |   | 3 | LIC[330]C[330]DILDVLDKHLIPAANTGESK  | 1 |
|                                                                                                                                                                                                                                                                     |                             |       |      |      |   |   | 3 | LIC[330]C[339]DILDVLDKHLIPAANTGESK  | 1 |
| 1433F_HUMAN (Q04917) 14-3-3 protein eta (Protein AS1) [MASS=28087]                                                                                                                                                                                                  | 1.00                        | 7.76  | 0.80 | 0.03 | 3 | 1 | 3 | ELETVC[339]NDVLSLLDKFLIK            | 1 |
|                                                                                                                                                                                                                                                                     |                             |       |      |      |   |   | 3 | ELETVC[330]NDVLSLLDKFLIK            | 1 |
|                                                                                                                                                                                                                                                                     |                             |       |      |      |   |   | 2 | ELETVC[330]NDVLSLLDKFLIK            | 1 |
| 1433G_HUMAN (P61981) 14-3-3 protein gamma (Protein kinase C inhibitor protein 1) (KCIP-1) [MASS=28171]                                                                                                                                                              | 1.00                        | 24.80 | 0.89 | 0.15 | 5 | 4 | 3 | ELEAVC[330]QDVLSLLDNYLIK            | 1 |
|                                                                                                                                                                                                                                                                     |                             |       |      |      |   |   | 2 | NC[330]SETQYESK                     | 1 |
|                                                                                                                                                                                                                                                                     |                             |       |      |      |   |   | 2 | NC[330]SETQYESKVFYLK                | 1 |
|                                                                                                                                                                                                                                                                     |                             |       |      |      |   |   | 2 | NC[339]SETQYESK                     | 1 |
|                                                                                                                                                                                                                                                                     |                             |       |      |      |   |   | 2 | ELEAVC[339]QDVLSLLDNYLIK            | 1 |
|                                                                                                                                                                                                                                                                     |                             |       |      |      |   |   | 2 | ELEAVC[330]QDVLSLLDNYLIK            | 1 |
| 3                                                                                                                                                                                                                                                                   | NC[330]SETQYESKVFYLMK[147]K | 1     |      |      |   |   |   |                                     |   |
| 1433T_HUMAN (P27348) 14-3-3 protein theta (14-3-3 protein tau) (14-3-3 protein T-cell) (HS1 protein) [MASS=27764]                                                                                                                                                   | 1.00                        | 39.18 | 0.90 | 0.06 | 3 | 5 | 2 | SIC[330]TTVLELLDK                   | 1 |
|                                                                                                                                                                                                                                                                     |                             |       |      |      |   |   | 2 | YLAEVAC[330]GDDRK                   | 1 |
|                                                                                                                                                                                                                                                                     |                             |       |      |      |   |   | 3 | SIC[339]TTVLELLDKYLIANATNPESK       | 1 |
|                                                                                                                                                                                                                                                                     |                             |       |      |      |   |   | 3 | LAEQAERYDDMATC[330]MKAVTEQGAELSNEER | 1 |
| 1433Z_HUMAN (P63104) 14-3-3 protein zeta/delta (Protein kinase C inhibitor protein 1) (KCIP-1) [MASS=27745]                                                                                                                                                         | 1.00                        | 18.37 | 0.60 | 0.06 | 3 | 3 | 2 | IETELRDIC[330]NDVLSLLEK             | 1 |
|                                                                                                                                                                                                                                                                     |                             |       |      |      |   |   | 2 | NELVQKAKLAEQAER                     | 1 |
|                                                                                                                                                                                                                                                                     |                             |       |      |      |   |   | 3 | IETELRDIC[330]NDVLSLLEK             | 1 |
|                                                                                                                                                                                                                                                                     |                             |       |      |      |   |   | 2 | DIC[330]NDVLSLLEK                   | 1 |
| 2A5A_HUMAN (Q15172) Serine/threonine-protein phosphatase 2A 56 kDa regulatory subunit alpha isoform (PP2A, B subunit, B' alpha isoform) (PP2A, B subunit, B56 alpha isoform) (PP2A, B subunit, PR61 alpha isoform) (PP2A, B subunit, R5 alpha isoform) [MASS=56193] | *                           | 3.50  | *    | *    | * | 1 | 3 | QNSAYNM[147]HSILSNTSAE              | 1 |



|                                                                                                                                                                                                                                                                               |      |      |      |      |   |   |   |                                             |   |
|-------------------------------------------------------------------------------------------------------------------------------------------------------------------------------------------------------------------------------------------------------------------------------|------|------|------|------|---|---|---|---------------------------------------------|---|
| 2AAA_HUMAN (P30153) Serine/threonine-protein phosphatase 2A 65 kDa regulatory subunit A alpha isoform (PP2A, subunit A, PR65-alpha isoform) (PP2A, subunit A, R1-alpha isoform) (Medium tumor antigen-associated 61 kDa protein) [MASS=65092]                                 | 1.00 | 6.80 | 0.84 | 0.02 | 3 | 2 | 3 | DNTIEHLLPLFLAQLKDEC[330]PEVR                | 1 |
|                                                                                                                                                                                                                                                                               |      |      |      |      |   |   | 2 | LNIISNLDC[330]VNEVIGIR                      | 1 |
|                                                                                                                                                                                                                                                                               |      |      |      |      |   |   | 3 | DNTIEHLLPLFLAQLKDEC[339]PEVR                | 1 |
| 2AAB_HUMAN (P30154) Serine/threonine-protein phosphatase 2A 65 kDa regulatory subunit A beta isoform (PP2A, subunit A, PR65-beta isoform) (PP2A, subunit A, R1-beta isoform) [MASS=66201]                                                                                     | 0.00 | 5.66 | *    | *    | * | 1 | 3 | LLAVEAC[330]VSIAQLSQQDLETLVMPTLRQAAEDK      | 1 |
| 2ABB_HUMAN (Q00005) Serine/threonine-protein phosphatase 2A 55 kDa regulatory subunit B beta isoform (PP2A, subunit B, B-beta isoform) (PP2A, subunit B, B55-beta isoform) (PP2A, subunit B, PR55-beta isoform) (PP2A, subunit B, R2-beta isoform) [MASS=51710]               | 0.00 | 8.58 | 1.40 | 0.00 | 1 | 2 | 2 | LRDPATITTLRVPVLR                            | 1 |
|                                                                                                                                                                                                                                                                               |      |      |      |      |   |   | 3 | FEC[330]VWNGSDSVIMTGSYNNFFR                 | 1 |
| 2B17_HUMAN (P13761) HLA class II histocompatibility antigen, DRB1-7 beta chain precursor (MHC class I antigen DRB1*7) (DR-7) (DR7) [MASS=29822]                                                                                                                               | 0.00 | 8.65 | *    | *    | * | 1 | 2 | SGEVYTC[339]QVEHPSVMSPLTVEWR                | 1 |
| 3BP1_HUMAN (Q9Y3L3) SH3 domain-binding protein 1 (3BP-1) [MASS=75713]                                                                                                                                                                                                         | 0.44 | 6.42 | 0.55 | 0.00 | 1 | 3 | 2 | RPAPARPTM[147]PPPQVSGSR                     | 1 |
|                                                                                                                                                                                                                                                                               |      |      |      |      |   |   | 2 | ERTESEVPPR                                  | 1 |
|                                                                                                                                                                                                                                                                               |      |      |      |      |   |   | 2 | RLQAC[330]LQGQSGADM[147]DKR                 | 1 |
| 41_HUMAN (P11171) Protein 4.1 (Band 4.1) (P4.1) (EPB4.1) (4.1R) [MASS=97016]                                                                                                                                                                                                  | 0.99 | 3.82 | *    | *    | * | 2 | 2 | VC[330]VEHHTFFR                             | 1 |
|                                                                                                                                                                                                                                                                               |      |      |      |      |   |   | 3 | FYPDPQAQLTEDITRYLVC[330]LQLR                | 1 |
| 5HT2A_HUMAN (P28223) 5-hydroxytryptamine 2A receptor (5-HT-2A) (Serotonin receptor 2A) (5-HT-2) [MASS=52603]                                                                                                                                                                  | 0.00 | 2.55 | 0.54 | 0.00 | 1 | 1 | 2 | EATLC[330]VSDLGTR                           | 1 |
| A4_HUMAN (P05067) Amyloid beta A4 protein precursor (APP) (ABPP) (Alzheimer disease amyloid protein) (Cerebral vascular amyloid peptide) (CVAP) (Protease nexin-II) (PN-II) (APPI) (PreA4) [Contains: Soluble APP-alpha (S-APP-alpha); Soluble APP-beta (S-APP)] [MASS=86943] | *    | 4.94 | *    | *    | * | 1 | 3 | LVFFAEDVGSNKGAIIGLMVGGVVIATVIVITLVM[147]LKK | 1 |

|                                                                                                                                                                                                                                                                     |      |       |      |      |   |   |   |                                                  |   |
|---------------------------------------------------------------------------------------------------------------------------------------------------------------------------------------------------------------------------------------------------------------------|------|-------|------|------|---|---|---|--------------------------------------------------|---|
|                                                                                                                                                                                                                                                                     |      |       |      |      |   |   | 2 | VGAFTMVC[339]K                                   | 1 |
|                                                                                                                                                                                                                                                                     |      |       |      |      |   |   | 1 | DADEAK                                           | 1 |
|                                                                                                                                                                                                                                                                     |      |       |      |      |   |   | 2 | NLDKEYLPIGGLAEFC[339]K                           | 2 |
| AATM_HUMAN (P00505) Aspartate aminotransferase, mitochondrial precursor (EC 2.6.1.1) (Transaminase A) (Glutamate oxaloacetate transaminase 2) [MASS=47475]                                                                                                          | 1.00 | 19.53 | 1.85 | 0.08 | 8 | 6 | 2 | HFIEQGIVNC[330]LC[330]QSYAK                      | 1 |
|                                                                                                                                                                                                                                                                     |      |       |      |      |   |   | 2 | NLDKEYLPIGGLAEFC[330]K                           | 2 |
|                                                                                                                                                                                                                                                                     |      |       |      |      |   |   | 2 | TC[339]GFDFTGAVEDISK                             | 1 |
|                                                                                                                                                                                                                                                                     |      |       |      |      |   |   | 2 | HFIEQGIVNC[339]LC[339]QSYAK                      | 1 |
|                                                                                                                                                                                                                                                                     |      |       |      |      |   |   | 3 | NLFAFFDM[147]AYQGFASGDGDK                        | 1 |
| ABCA3_HUMAN (Q99758) ATP-binding cassette sub-family A member 3 (ATP-binding cassette transporter 3) (ATP-binding cassette 3) (ABC-C transporter) [MASS=191361]                                                                                                     | 0.00 | 9.15  | 1.05 | 0.00 | 1 | 6 | 3 | C[339]PEEVKQMLHIIGLEDKWNSR                       | 1 |
|                                                                                                                                                                                                                                                                     |      |       |      |      |   |   | 3 | EGFLAVQHAVDRAIMEYHADAATR                         | 1 |
|                                                                                                                                                                                                                                                                     |      |       |      |      |   |   | 3 | M[147]VAAQVLVPLTC[339]VTLALLAINYSSELFDDPM[147]LR | 1 |
|                                                                                                                                                                                                                                                                     |      |       |      |      |   |   | 2 | ANM[147]AAAFGGFLYFFTYIPYFFVAPR                   | 1 |
|                                                                                                                                                                                                                                                                     |      |       |      |      |   |   | 3 | VGKLVDSM[147]DIQAIQLPALQYQHERR                   | 1 |
|                                                                                                                                                                                                                                                                     |      |       |      |      |   |   | 3 | QRIGYC[330]PQFDALLDHMTGREM[147]LVMYAR            | 1 |
| ABCAC_HUMAN (Q86UK0) ATP-binding cassette sub-family A member 12 (ATP-binding cassette transporter 12) (ATP-binding cassette 12) [MASS=293249]                                                                                                                      | 0.00 | 3.35  | 0.37 | 0.00 | 1 | 4 | 2 | LGAM[147]FVALVSQGTMMFFSLRLLINESLIK               | 1 |
|                                                                                                                                                                                                                                                                     |      |       |      |      |   |   | 3 | IGNSNANGISTPDDLSVSSSNFTDRDDK                     | 1 |
|                                                                                                                                                                                                                                                                     |      |       |      |      |   |   | 2 | NMGVC[330]M[147]QHDVLFYSYLTTK                    | 1 |
|                                                                                                                                                                                                                                                                     |      |       |      |      |   |   | 2 | SVPLTQAMYRSNR                                    | 1 |
| ACET_HUMAN (P22966) Angiotensin-converting enzyme, testis-specific isoform precursor (EC 3.4.15.1) (EC 3.2.1.-) (ACE-T) (Dipeptidyl carboxypeptidase I) (Kininase II) [Contains: Angiotensin-converting enzyme, testis-specific isoform, soluble form] [MASS=83330] | 0.00 | 3.69  | 0.46 | 0.00 | 1 | 1 | 3 | QC[330]TTVNLEDLVVAHHEM[147]GHIQYFMQYK            | 1 |
| ACL6B_HUMAN (O94805) Actin-like protein 6B (53 kDa BRG1-associated factor B) (Actin-related protein Baf53b) (ArpNalpha) [MASS=46877]                                                                                                                                | *    | 10.33 | *    | *    | * | 2 | 2 | SEPNLHPVLMSEAPWNTRAK                             | 1 |
|                                                                                                                                                                                                                                                                     |      |       |      |      |   |   | 2 | MSGGVYGGDEVGALVFDIGSFSVR                         | 1 |
| ACL7A_HUMAN (Q9Y615) Actin-like protein 7A (Actin-like-7-alpha) (Actin-like 7A) [MASS=48644]                                                                                                                                                                        | *    | 2.76  | *    | *    | * | 1 | 2 | PYM[147]ETAKTGDNR                                | 1 |
|                                                                                                                                                                                                                                                                     |      |       |      |      |   |   | 3 | VAVPSTIHC[339]DHLIEAQVGGEK                       | 2 |
| ACON_HUMAN (Q99798) Aconitate hydratase, mitochondrial precursor (EC 4.2.1.3) (Citrate hydro-lyase) (Aconitase) [MASS=85425]                                                                                                                                        | 1.00 | 6.15  | 1.77 | 0.04 | 6 | 2 | 3 | VAVPSTIHC[330]DHLIEAQVGGEK                       | 1 |
|                                                                                                                                                                                                                                                                     |      |       |      |      |   |   | 2 | VAVPSTIHC[330]DHLIEAQVGGEK                       | 1 |
|                                                                                                                                                                                                                                                                     |      |       |      |      |   |   | 3 | HGIRWVVIKDENVYEGESSREHAALPR                      | 1 |
|                                                                                                                                                                                                                                                                     |      |       |      |      |   |   | 2 | VAVPSTIHC[339]DHLIEAQVGGEK                       | 2 |

|                                                                                                                                                                                                                                                                             |      |       |      |      |   |   |                                                                                                                                                           |                                         |   |
|-----------------------------------------------------------------------------------------------------------------------------------------------------------------------------------------------------------------------------------------------------------------------------|------|-------|------|------|---|---|-----------------------------------------------------------------------------------------------------------------------------------------------------------|-----------------------------------------|---|
| ACOT1_HUMAN (Q86TX2) Acyl-coenzyme A thioesterase 1 (EC 3.1.2.2) (Acyl-CoA thioesterase 1) (Inducible cytosolic acyl-coenzyme A thioester hydrolase) (Long chain acyl-CoA thioester hydrolase) (Long chain acyl-CoA hydrolase) (CTE-I) (CTE-Ib) [MASS=46277]                | *    | 8.08  | *    | *    | * | 1 | 3                                                                                                                                                         | AGRVRGTLFLPPEPGPFPGIVDM[147]FGTGGGLLEYR | 1 |
| ACOT9_HUMAN (Q9Y305) Acyl-coenzyme A thioesterase 9 (EC 3.1.2.-) (Acyl-CoA thioesterase 9) (Acyl-CoA thioester hydrolase 9) [MASS=46354]                                                                                                                                    | 1.00 | 8.13  | 1.13 | 0.00 | 2 | 3 | 2 MRRAPC[339]VR<br>2 SLEIC[339]HPQER<br>2 SLEIC[330]HPQER<br>3 VLPSNAVWMENSKLK                                                                            | 1<br>1<br>1<br>1                        |   |
| ACOX2_HUMAN (Q99424) Acyl-coenzyme A oxidase 2, peroxisomal (EC 1.17.99.3) (3-alpha,7-alpha,12-alpha-trihydroxy-5-beta-cholestanoyl-CoA 24-hydroxylase) (3-alpha,7-alpha,12-alpha-trihydroxy-5-beta-cholestanoyl-CoA oxidase) (Trihydroxycoprostanoyl-CoA oxid [MASS=76826] | 0.00 | 7.05  | 3.80 | 0.00 | 1 | 2 | 3 RLC[339]DLHAIHGILTNSGDFLHDAFLSGAQVDMAR<br>3 LTNILDGGAQNTALR                                                                                             | 1<br>1                                  |   |
| ACPM_HUMAN (O14561) Acyl carrier protein, mitochondrial precursor (ACP) (NADH-ubiquinone oxidoreductase 9.6 kDa subunit) (Cl-SDAP) [MASS=17417]                                                                                                                             | 1.00 | 30.77 | 1.39 | 0.11 | 5 | 3 | 2 LM[147]C[339]PQEIVDYIADKK<br>3 LM[147]C[339]PQEIVDYIADKKDVYE<br>2 LMC[339]PQEIVDYIADKK<br>2 LM[147]C[339]PQEIVDYIADK<br>2 LM[147]C[339]PQEIVDYIADKKDVYE | 1<br>1<br>1<br>1<br>1                   |   |
| ACSL4_HUMAN (O60488) Long-chain-fatty-acid-CoA ligase 4 (EC 6.2.1.3) (Long-chain acyl-CoA synthetase 4) (LACS 4) [MASS=79188]                                                                                                                                               | *    | 9.28  | *    | *    | * | 3 | 2 VKALLGGNVRM[147]M[147]LSGGAPLSPQTHR<br>3 PKGVMM[147]HHSNLIAGM[147]TGQC[339]ER<br>2 GDC[339]TVLKPTLMAAVPEIMDR                                            | 1<br>1<br>1                             |   |

|                                                                                                                                                                                                                                                                 |      |       |      |      |    |   |  |   |                                                  |   |
|-----------------------------------------------------------------------------------------------------------------------------------------------------------------------------------------------------------------------------------------------------------------|------|-------|------|------|----|---|--|---|--------------------------------------------------|---|
|                                                                                                                                                                                                                                                                 |      |       |      |      |    |   |  | 1 | C[339]DVIDIRK                                    | 2 |
|                                                                                                                                                                                                                                                                 |      |       |      |      |    |   |  | 2 | EKLC[330]YVALDFEQEM[147]ATAASSSSLEK              | 2 |
|                                                                                                                                                                                                                                                                 |      |       |      |      |    |   |  | 3 | EKLC[330]YVALDFEQEM[147]ATAASSSSLEK              | 1 |
|                                                                                                                                                                                                                                                                 |      |       |      |      |    |   |  | 3 | FRC[330]PEALFQPSFLGM[147]ESC[330]GIHETTFNSIMK    | 1 |
|                                                                                                                                                                                                                                                                 |      |       |      |      |    |   |  | 2 | IWHHTFYNELR                                      | 1 |
|                                                                                                                                                                                                                                                                 |      |       |      |      |    |   |  | 3 | C[330]PEALFQPSFLGM[147]ESC[330]GIHETTFNSIMK      | 1 |
|                                                                                                                                                                                                                                                                 |      |       |      |      |    |   |  | 3 | FRC[330]PEALFQPSFLGMESC[330]GIHETTFNSIMK         | 1 |
| ACTB_HUMAN (P60709) Actin, cytoplasmic 1 (Beta-actin) [MASS=41736]                                                                                                                                                                                              | 1.00 | 40.00 | 0.73 | 0.12 | 12 | 7 |  | 1 | C[330]DVIDIRK                                    | 1 |
|                                                                                                                                                                                                                                                                 |      |       |      |      |    |   |  | 3 | C[339]PEALFQPSFLGM[147]ESC[339]GIHETTFNSIM[147]K | 1 |
|                                                                                                                                                                                                                                                                 |      |       |      |      |    |   |  | 3 | C[330]PEALFQPSFLGM[147]ESC[330]GIHETTFNSIM[147]K | 3 |
|                                                                                                                                                                                                                                                                 |      |       |      |      |    |   |  | 2 | DLYANTVLSGGTTMYPGIADRMQK                         | 1 |
|                                                                                                                                                                                                                                                                 |      |       |      |      |    |   |  | 2 | C[339]DVIDIRK                                    | 2 |
|                                                                                                                                                                                                                                                                 |      |       |      |      |    |   |  | 2 | KDLYANTVLSGGTTM[147]YPGIADRMQK                   | 1 |
|                                                                                                                                                                                                                                                                 |      |       |      |      |    |   |  | 3 | C[339]PEALFQPSFLGMESC[339]GIHETTFNSIM[147]K      | 1 |
|                                                                                                                                                                                                                                                                 |      |       |      |      |    |   |  | 3 | C[330]PEALFQPSFLGMESC[330]GIHETTFNSIMK           | 1 |
| ACTY_HUMAN (P42025) Beta-centractin (Actin-related protein 1B) (ARP1B) [MASS=42293]                                                                                                                                                                             | 0.00 | 2.93  | *    | *    | *  | 1 |  | 2 | YC[339]FPNYVGRPK                                 | 1 |
| ACTZ_HUMAN (P61163) Alpha-centractin (Centractin) (Centrosome-associated actin homolog) (Actin-RPV) (ARP1) [MASS=42613]                                                                                                                                         | 0.00 | 5.32  | 0.09 | 0.00 | 1  | 1 |  | 2 | AEEHRGLLSIRYPMEHGIVK                             | 1 |
| ACVR1_HUMAN (Q04771) Activin receptor type-1 precursor (EC 2.7.11.30) (Activin receptor type I) (ACTR-I) (Serine/threonine-protein kinase receptor R1) (SKR1) (Activin receptor-like kinase 2) (ALK-2) (TGF-B superfamily receptor type I) (TSR-I) [MASS=57153] | *    | 2.36  | *    | *    | *  | 1 |  | 3 | QITLLEC[330]VGKGR                                | 1 |
| ACY2_HUMAN (P45381) Aspartoacylase (EC 3.5.1.15) (Aminoacylase-2) (ACY-2) [MASS=35735]                                                                                                                                                                          | 0.00 | 12.14 | 0.31 | 0.00 | 1  | 2 |  | 3 | TIPLGGDC[330]TVYPVVFVNEAAYYEKK                   | 1 |
|                                                                                                                                                                                                                                                                 |      |       |      |      |    |   |  | 2 | EAFAKTTKLTNAK                                    | 1 |
| ADA12_HUMAN (O43184) ADAM 12 precursor (EC 3.4.24.-) (A disintegrin and metalloproteinase domain 12) (Meltrin alpha) [MASS=99641]                                                                                                                               | 0.00 | 2.86  | 3.03 | 0.00 | 1  | 1 |  | 2 | LLQC[339]QNVDISRPLNGLNVPQPQSTQR                  | 1 |

|                                                                                                                                                                                                                       |      |      |      |      |   |   |   |                                                      |   |
|-----------------------------------------------------------------------------------------------------------------------------------------------------------------------------------------------------------------------|------|------|------|------|---|---|---|------------------------------------------------------|---|
| ADA18_HUMAN (Q9Y3Q7) ADAM 18 precursor (A disintegrin and metalloproteinase domain 18) (Transmembrane metalloproteinase-like, disintegrin-like, and cysteine-rich protein III) (tMDC III) [MASS=82856]                | *    | 3.65 | *    | *    | * | 1 | 3 | SDGTDNAYVADGTM[147]C[339]GPEM[147]YC[330]VNKTC[330]R | 1 |
|                                                                                                                                                                                                                       |      |      |      |      |   |   | 3 | SDGTDNAYVADGTM[147]C[330]GPEMYC[330]VNKTC[339]R      | 1 |
| ADA22_HUMAN (Q9P0K1) ADAM 22 precursor (A disintegrin and metalloproteinase domain 22) (Metalloproteinase-like, disintegrin-like, and cysteine-rich protein 2) (Metalloproteinase-disintegrin ADAM22-3) [MASS=100432] | 0.89 | 5.41 | 0.63 | 0.00 | 1 | 3 | 3 | DQLKTRIVLVAM[147]ETWATDNK                            | 1 |
|                                                                                                                                                                                                                       |      |      |      |      |   |   | 2 | HISDIC[330]ENGRPR                                    | 1 |
|                                                                                                                                                                                                                       |      |      |      |      |   |   | 2 | DVLC[330]GYLLC[330]TNIGNIPR                          | 1 |
| ADA23_HUMAN (O75077) ADAM 23 precursor (A disintegrin and metalloproteinase domain 23) (Metalloproteinase-like, disintegrin-like, and cysteine-rich protein 3) (MDC-3) [MASS=91926]                                   | 0.99 | 4.57 | 0.50 | 0.00 | 1 | 2 | 2 | RSSLSYFGGVC[330]SR                                   | 1 |
|                                                                                                                                                                                                                       |      |      |      |      |   |   | 3 | DAVNEC[330]DITEYC[330]TGDSGQC[330]PPNLHK             | 1 |
| ADAM2_HUMAN (Q99965) ADAM 2 precursor (A disintegrin and metalloproteinase domain 2) (Fertilin subunit beta) (PH-30) (PH30) [MASS=82457]                                                                              | 0.00 | 2.86 | 5.25 | 0.00 | 1 | 1 | 3 | C[339]QC[339]SGAVC[339]IM[147]NPEAIHFSGVK            | 1 |
| ADAM8_HUMAN (P78325) ADAM 8 precursor (EC 3.4.24.-) (A disintegrin and metalloproteinase domain 8) (Cell surface antigen MS2) (CD156a antigen) (CD156) [MASS=88673]                                                   | 0.00 | 4.13 | 0.55 | 0.00 | 1 | 2 | 2 | C[339]IM[147]AGSIGSSFPR                              | 1 |
|                                                                                                                                                                                                                       |      |      |      |      |   |   | 3 | PPPAPPVTVSSPPFPVPVYTR                                | 1 |
| ADCY5_HUMAN (O95622) Adenylate cyclase type 5 (EC 4.6.1.1) (Adenylate cyclase type V) (ATP pyrophosphate-lyase 5) (Adenylyl cyclase 5) (Fragment) [MASS=100876]                                                       | 0.00 | 5.93 | 0.96 | 0.00 | 1 | 4 | 2 | ADINAKQEDM[147]M[147]FHK                             | 1 |
|                                                                                                                                                                                                                       |      |      |      |      |   |   | 2 | M[147]DSTGVPDR                                       | 1 |
|                                                                                                                                                                                                                       |      |      |      |      |   |   | 2 | HVAMEMKADINAKQEDMM[147]FHK                           | 1 |
|                                                                                                                                                                                                                       |      |      |      |      |   |   | 2 | VHC[339]GVLGLR                                       | 1 |
| ADCY6_HUMAN (O43306) Adenylate cyclase type 6 (EC 4.6.1.1) (Adenylate cyclase type VI) (ATP pyrophosphate-lyase 6) (Ca(2+)-inhibitable adenylyl cyclase) [MASS=130615]                                                | 0.00 | 2.14 | *    | *    | * | 1 | 3 | KPQYDIWGNTVNVSSRMDSTGVPDR                            | 1 |
| ADDA_HUMAN (P35611) Alpha-adducin (Erythrocyte adducin subunit alpha) [MASS=80955]                                                                                                                                    | 0.00 | 2.31 | 0.71 | 0.00 | 1 | 1 | 2 | C[330]VVHIHTPAGAAVSAMK                               | 1 |

|                                                                                                                                                                                                                                                                              |      |       |      |      |   |   |                                                              |                                      |   |
|------------------------------------------------------------------------------------------------------------------------------------------------------------------------------------------------------------------------------------------------------------------------------|------|-------|------|------|---|---|--------------------------------------------------------------|--------------------------------------|---|
| ADDB_HUMAN (P35612) Beta-adducin (Erythrocyte adducin subunit beta) [MASS=80722]                                                                                                                                                                                             | *    | 3.59  | *    | *    | * | 1 | 3                                                            | GSSC[339]FPVDTTGFC[330]LHSAIYAARPDVR | 1 |
| ADIPO_HUMAN (Q15848) Adiponectin precursor (Adipocyte, C1q and collagen domain-containing protein) (30 kDa adipocyte complement-related protein) (Adipocyte complement-related 30 kDa protein) (ACRP30) (Adipose most abundant gene transcript 1) (apM-1) (Gel [MASS=26413]) | 0.22 | 15.98 | 0.80 | 0.00 | 1 | 2 | 1 DGTPGKEK<br>3 GAC[339]TGWM[147]AGIPGHPGHNGAPGRDGRDGTGPEK   | 1<br>1                               |   |
| ADMP_HUMAN (Q8NFR3) Protein ADMP [MASS=9198]                                                                                                                                                                                                                                 | 0.00 | 13.16 | 0.56 | 0.00 | 1 | 1 | 2 IC[339]GYHSTISN                                            | 1                                    |   |
| ADO_HUMAN (Q06278) Aldehyde oxidase (EC 1.2.3.1) [MASS=147930]                                                                                                                                                                                                               | *    | 0.97  | *    | *    | * | 1 | 2 VAVEKFNAENYWK                                              | 1                                    |   |
| ADRO_HUMAN (P22570) NADPH:adrenodoxin oxidoreductase, mitochondrial precursor (EC 1.18.1.2) (Adrenodoxin reductase) (AR) (Ferredoxin reductase) (Ferredoxin--NADP(+) reductase) [MASS=53836]                                                                                 | *    | 8.55  | *    | *    | * | 2 | 3 PVSFSDWEKLDAAEEVAR<br>2 GPTGVIATTM[147]TDSFLTGM[147]LLQDLK | 1<br>1                               |   |

|                                                                                                                                                                                                                                               |      |       |      |      |   |   |  |   |                                  |    |
|-----------------------------------------------------------------------------------------------------------------------------------------------------------------------------------------------------------------------------------------------|------|-------|------|------|---|---|--|---|----------------------------------|----|
|                                                                                                                                                                                                                                               |      |       |      |      |   |   |  | 2 | YFAGNLASGGAAGATSLC[330]FVYPLDFAR | 6  |
|                                                                                                                                                                                                                                               |      |       |      |      |   |   |  | 2 | EFHGLGDC[339]IIK                 | 1  |
|                                                                                                                                                                                                                                               |      |       |      |      |   |   |  | 1 | EFHGLGDC[339]IIK                 | 4  |
| ADT1_HUMAN (P12235) ADP/ATP translocase<br>1 (Adenine nucleotide translocator 1) (ANT 1)<br>(ADP,ATP carrier protein 1) (Solute carrier<br>family 25 member 4) (ADP,ATP carrier protein,<br>heart/skeletal muscle isoform T1)<br>[MASS=32933] | 1.00 | 12.79 | 1.69 | 0.02 | 7 | 2 |  | 2 | YFAGNLASGGAAGATSLC[339]FVYPLDFAR | 10 |
|                                                                                                                                                                                                                                               |      |       |      |      |   |   |  | 2 | EFHGLGDC[330]IIK                 | 1  |
|                                                                                                                                                                                                                                               |      |       |      |      |   |   |  | 1 | EFHGLGDC[330]IIK                 | 1  |
|                                                                                                                                                                                                                                               |      |       |      |      |   |   |  | 3 | YFAGNLASGGAAGATSLC[339]FVYPLDFAR | 4  |
|                                                                                                                                                                                                                                               |      |       |      |      |   |   |  | 3 | YFAGNLASGGAAGATSLC[330]FVYPLDFAR | 2  |
| ADT2_HUMAN (P05141) ADP/ATP translocase<br>2 (Adenine nucleotide translocator 2) (ANT 2)<br>(ADP,ATP carrier protein 2) (Solute carrier<br>family 25 member 5) (ADP,ATP carrier protein,<br>fibroblast isoform) [MASS=32764]                  | 1.00 | 2.69  | 0.44 | 0.00 | 1 | 1 |  | 1 | GLGDC[330]LVK                    | 1  |
|                                                                                                                                                                                                                                               |      |       |      |      |   |   |  | 2 | GLGDC[339]LVK                    | 1  |

|                                                                                                                                                                                                                                                                               |      |       |      |      |    |   |   |                                                 |   |
|-------------------------------------------------------------------------------------------------------------------------------------------------------------------------------------------------------------------------------------------------------------------------------|------|-------|------|------|----|---|---|-------------------------------------------------|---|
| AKAP9_HUMAN (Q99996) A-kinase anchor protein 9 (Protein kinase A-anchoring protein 9) (PRKA9) (A-kinase anchor protein 450 kDa) (AKAP 450) (A-kinase anchor protein 350 kDa) (AKAP 350) (hgAKAP 350) (AKAP 120-like protein) (Protein hyperion) (Protein yotia) [MASS=453664] | *    | 2.40  | *    | *    | *  | 4 | 3 | EHYVAVQLLKEEC[330]GTLKAVIQC[339]LR              | 1 |
|                                                                                                                                                                                                                                                                               |      |       |      |      |    |   | 2 | AENVQSC[339]DTQVSSLLDGVVTM[147]TSRGAEGSVSK      | 1 |
|                                                                                                                                                                                                                                                                               |      |       |      |      |    |   | 3 | EILLSNSDPHDIPESKDC[339]VLTISEEM[147]FSKDK       | 1 |
|                                                                                                                                                                                                                                                                               |      |       |      |      |    |   | 2 | AVIQC[330]LR                                    | 2 |
| AKT1_HUMAN (P31749) RAC-alpha serine/threonine-protein kinase (EC 2.7.11.1) (RAC-PK-alpha) (Protein kinase B) (PKB) (C-AKT) [MASS=55686]                                                                                                                                      | *    | 4.79  | *    | *    | *  | 2 | 2 | EGIKDGATM[147]K                                 | 1 |
|                                                                                                                                                                                                                                                                               |      |       |      |      |    |   | 3 | DGHIKITDFGLC[339]K                              | 1 |
| AKT2_HUMAN (P31751) RAC-beta serine/threonine-protein kinase (EC 2.7.11.1) (RAC-PK-beta) (Protein kinase Akt-2) (Protein kinase B, beta) (PKB beta) [MASS=55768]                                                                                                              | *    | 2.49  | *    | *    | *  | 1 | 3 | AIQMVANSLKQR                                    | 1 |
| AL2SF_HUMAN (Q6ZP36) Amyotrophic lateral sclerosis 2 chromosomal region candidate gene 16 protein [MASS=44221]                                                                                                                                                                | 0.00 | 12.07 | *    | *    | *  | 2 | 3 | C[339]C[330]LLHLFGAIVAGGQRNALQAISPATMEVLM[147]R | 1 |
|                                                                                                                                                                                                                                                                               |      |       |      |      |    |   | 3 | LLNSDHSALPNQRR                                  | 1 |
| AL7A1_HUMAN (P49419) Aldehyde dehydrogenase family 7 member A1 (EC 1.2.1.3) (Antiquitin-1) [MASS=55235]                                                                                                                                                                       | 0.95 | 6.47  | 1.23 | 0.00 | 1  | 2 | 2 | LPGAIC[339]SLTC[339]GGADIGTAM[147]AKDER         | 1 |
|                                                                                                                                                                                                                                                                               |      |       |      |      |    |   | 2 | STC[339]TINYSK                                  | 1 |
|                                                                                                                                                                                                                                                                               |      |       |      |      |    |   | 3 | VHTEC[339]C[339]HGDLLC[339]ADDRADLAK            | 1 |
|                                                                                                                                                                                                                                                                               |      |       |      |      |    |   | 2 | LKEC[339]C[339]EKPLLEK                          | 1 |
|                                                                                                                                                                                                                                                                               |      |       |      |      |    |   | 2 | ALVLIIFAQYLQQC[330]PFEDHVK                      | 1 |
|                                                                                                                                                                                                                                                                               |      |       |      |      |    |   | 2 | NEC[339]FLQHKDDNPRLVR                           | 1 |
|                                                                                                                                                                                                                                                                               |      |       |      |      |    |   | 2 | LKEC[330]C[330]EKPLLEK                          | 1 |
| ALBU_HUMAN (P02768) Serum albumin precursor [MASS=69366]                                                                                                                                                                                                                      | 1.00 | 25.12 | 0.73 | 0.07 | 10 | 9 | 2 | C[339]C[339]AAADPHEC[339]YAK                    | 1 |
|                                                                                                                                                                                                                                                                               |      |       |      |      |    |   | 2 | C[330]C[330]AAADPHEC[330]YAK                    | 1 |
|                                                                                                                                                                                                                                                                               |      |       |      |      |    |   | 3 | LKEC[330]C[330]EKPLLEK                          | 1 |
|                                                                                                                                                                                                                                                                               |      |       |      |      |    |   | 3 | QEPERNEC[339]FLQHKDDNPRLPR                      | 1 |
|                                                                                                                                                                                                                                                                               |      |       |      |      |    |   | 2 | ADDKETC[330]FAEEGKK                             | 1 |
|                                                                                                                                                                                                                                                                               |      |       |      |      |    |   | 3 | QEPERNEC[330]FLQHKDDNPRLPR                      | 1 |
|                                                                                                                                                                                                                                                                               |      |       |      |      |    |   | 1 | DVC[339]KNYAEAK                                 | 1 |
|                                                                                                                                                                                                                                                                               |      |       |      |      |    |   | 3 | M[147]PC[330]AEDYLSVVLNQLC[330]VLHEK            | 1 |
| ALDH2_HUMAN (P05091) Aldehyde dehydrogenase, mitochondrial precursor (EC 1.2.1.3) (ALDH class 2) (ALDH1) (ALDH-E2) [MASS=56381]                                                                                                                                               | 1.00 | 7.16  | 1.31 | 0.05 | 2  | 2 | 3 | TFPTVNPSTGEVIC[339]QVAEGDKEDVDK                 | 1 |
|                                                                                                                                                                                                                                                                               |      |       |      |      |    |   | 2 | LLC[339]GGGIAADR                                | 1 |



|                                                                                                                                                                                                                                |      |       |      |      |   |   |   |                                       |   |
|--------------------------------------------------------------------------------------------------------------------------------------------------------------------------------------------------------------------------------|------|-------|------|------|---|---|---|---------------------------------------|---|
| ALDOA_HUMAN (P04075) Fructose-bisphosphate aldolase A (EC 4.1.2.13) (Muscle-type aldolase) (Lung cancer antigen NY-LU-1) [MASS=39289]                                                                                          | 1.00 | 32.23 | 0.80 | 0.21 | 8 | 8 | 3 | QLLLTADDRVNPC[330]IGGVILFHETLYQK      | 1 |
|                                                                                                                                                                                                                                |      |       |      |      |   |   | 1 | C[330]AQYK                            | 1 |
|                                                                                                                                                                                                                                |      |       |      |      |   |   | 3 | ALSDHHIYLEGTLKPNM[147]VTPGHAC[330]TQK | 1 |
|                                                                                                                                                                                                                                |      |       |      |      |   |   | 2 | C[339]AQYKK                           | 1 |
|                                                                                                                                                                                                                                |      |       |      |      |   |   | 3 | QLLLTADDRVNPC[339]IGGVILFHETLYQK      | 1 |
|                                                                                                                                                                                                                                |      |       |      |      |   |   | 3 | ADDGRPFPPQVIKSK                       | 1 |
|                                                                                                                                                                                                                                |      |       |      |      |   |   | 2 | VNPC[330]IGGVILFHETLYQK               | 1 |
| ALDOB_HUMAN                                                                                                                                                                                                                    | 0.00 | 4.96  | *    | *    | * | 1 | 2 | GILAADESVGTM[147]GNRLQR               | 1 |
|                                                                                                                                                                                                                                |      |       |      |      |   |   |   |                                       |   |
| ALDOC_HUMAN (P09972) Fructose-bisphosphate aldolase C (EC 4.1.2.13) (Brain-type aldolase) [MASS=39324]                                                                                                                         | 0.00 | 7.71  | *    | *    | * | 1 | 2 | ALSDHHVYLEGTLKPNM[147]VTPGHAC[339]PIK | 1 |
| ALMS1_HUMAN (Q8TCU4) Alstrom syndrome protein 1 [MASS=460933]                                                                                                                                                                  | *    | 1.37  | *    | *    | * | 4 | 2 | DC[330]DRYDDLDC[330]SYM[147]SWK       | 1 |
|                                                                                                                                                                                                                                |      |       |      |      |   |   | 2 | EPSSTGVSNGLLHR                        | 1 |
|                                                                                                                                                                                                                                |      |       |      |      |   |   | 2 | PIVNYKQAFPDGHLPEEALK                  | 1 |
|                                                                                                                                                                                                                                |      |       |      |      |   |   | 2 | ERQRQQR                               | 1 |
| ALU8_HUMAN (P39195) Alu subfamily SX sequence contamination warning entry [MASS=64492]                                                                                                                                         | *    | 2.03  | *    | *    | * | 1 | 2 | AC[339]NPSYSGGXGR                     | 1 |
| AMOL1_HUMAN (Q8IY63) Angiotensin-like protein 1 [MASS=106573]                                                                                                                                                                  | *    | 1.88  | *    | *    | * | 1 | 2 | VEKLQQALTQLQSAC[330]EKR               | 1 |
| AMPB_HUMAN (Q9H4A4) Aminopeptidase B (EC 3.4.11.6) (Ap-B) (Arginyl aminopeptidase) (Arginine aminopeptidase) [MASS=72595]                                                                                                      | 0.00 | 3.08  | 0.35 | 0.00 | 1 | 1 | 3 | RISTILFGAAYTC[330]LEAATGR             | 1 |
| ANAG_HUMAN (P54802) Alpha-N-acetylglucosaminidase precursor (EC 3.2.1.50) (N-acetyl-alpha-glucosaminidase) (NAG) [Contains: Alpha-N-acetylglucosaminidase 82 kDa form; Alpha-N-acetylglucosaminidase 77 kDa form] [MASS=82166] | *    | 3.36  | *    | *    | * | 1 | 3 | M[147]GNLHTWDGGLPPSWHIKQLYLQHR        | 1 |
| ANFY1_HUMAN (Q9P2R3) Ankyrin repeat and FYVE domain-containing protein 1 (Ankyrin repeats hooked to a zinc finger motif) [MASS=128398]                                                                                         | 0.00 | 7.19  | 0.21 | 0.00 | 1 | 5 | 1 | EIPIIK                                | 1 |
|                                                                                                                                                                                                                                |      |       |      |      |   |   | 2 | EDDVFLTELM[147]KLANRFQLQLLR           | 1 |
|                                                                                                                                                                                                                                |      |       |      |      |   |   | 3 | ENAAAFDLFLEC[339]MPGYPLDK             | 1 |
|                                                                                                                                                                                                                                |      |       |      |      |   |   | 3 | KHHC[330]RHC[330]GR                   | 1 |
|                                                                                                                                                                                                                                |      |       |      |      |   |   | 3 | PDADGSTVLLLAYM[147]KGNANLC[339]RAIVR  | 1 |

|                                                                                                                                                                                                                                                                               |      |       |      |      |   |   |   |                                               |   |
|-------------------------------------------------------------------------------------------------------------------------------------------------------------------------------------------------------------------------------------------------------------------------------|------|-------|------|------|---|---|---|-----------------------------------------------|---|
| ANK2_HUMAN (Q01484) Ankyrin-2 (Brain ankyrin) (Ankyrin-B) (Ankyrin, nonerythroid) [MASS=430341]                                                                                                                                                                               | 0.99 | 2.68  | 0.91 | 0.04 | 2 | 7 | 3 | NGYTPLHIAAKK                                  | 1 |
|                                                                                                                                                                                                                                                                               |      |       |      |      |   |   | 2 | PNATTANGNTALAIK                               | 1 |
|                                                                                                                                                                                                                                                                               |      |       |      |      |   |   | 2 | GLVHQAIK[330]NLNITLPIYTK                      | 1 |
|                                                                                                                                                                                                                                                                               |      |       |      |      |   |   | 3 | C[339]LLRNGALVDAR                             | 1 |
|                                                                                                                                                                                                                                                                               |      |       |      |      |   |   | 3 | AESPQADC[330]PSEFSSSSSSLPHC[330]LVSEGK        | 1 |
|                                                                                                                                                                                                                                                                               |      |       |      |      |   |   | 1 | EDAAGGKEK                                     | 1 |
| ANKR5_HUMAN (Q9NU02) Ankyrin repeat domain-containing protein 5 [MASS=86664]                                                                                                                                                                                                  | 0.00 | 7.86  | 0.35 | 0.00 | 1 | 3 | 3 | KEEELLSSYGVPTTSEGKK                           | 1 |
|                                                                                                                                                                                                                                                                               |      |       |      |      |   |   | 3 | M[147]GC[330]TPTM[147]RAAELGHELMS[147]EILAKAK | 1 |
|                                                                                                                                                                                                                                                                               |      |       |      |      |   |   | 2 | MGC[330]TPTM[147]RAAELGHELSMEILAKAK           | 1 |
|                                                                                                                                                                                                                                                                               |      |       |      |      |   |   | 3 | KGHSAMDVAKAYADYR                              | 1 |
| ANR11_HUMAN (Q6UB99) Ankyrin repeat domain-containing protein 11 (Ankyrin repeat-containing cofactor 1) [MASS=298068]                                                                                                                                                         | *    | 2.44  | *    | *    | * | 4 | 2 | ELISEGADVNVK                                  | 1 |
|                                                                                                                                                                                                                                                                               |      |       |      |      |   |   | 2 | KDSGQYEKDFLEADAYGVSYNMK                       | 1 |
|                                                                                                                                                                                                                                                                               |      |       |      |      |   |   | 2 | GQEPGLTAFLEVSFTEPPGDDKPR                      | 1 |
|                                                                                                                                                                                                                                                                               |      |       |      |      |   |   | 1 | HAAEDK                                        | 2 |
| ANXA2_HUMAN (P07355) Annexin A2 (Annexin II) (Lipocortin II) (Calpactin I heavy chain) (Chromobindin-8) (p36) (Protein I) (Placental anticoagulant protein IV) (PAP-IV) [MASS=38473]                                                                                          | 1.00 | 15.09 | 1.64 | 0.00 | 2 | 3 | 3 | GDLENAFLNLVQC[339]IQNKPLYFADR                 | 1 |
|                                                                                                                                                                                                                                                                               |      |       |      |      |   |   | 2 | EM[147]YKTDLEK                                | 1 |
|                                                                                                                                                                                                                                                                               |      |       |      |      |   |   | 3 | GDLENAFLNLVQC[330]IQNKPLYFADR                 | 1 |
|                                                                                                                                                                                                                                                                               |      |       |      |      |   |   | 2 | RAEDGSVIDYELIDQDAR                            | 1 |
| ANXA6_HUMAN (P08133) Annexin A6 (Annexin VI) (Lipocortin VI) (P68) (P70) (Protein III) (Chromobindin-20) (67 kDa calelectrin) (Calphobindin-II) (CPB-II) [MASS=75742]                                                                                                         | 1.00 | 5.21  | 0.99 | 0.05 | 3 | 3 | 2 | LIVGLM[147]RPPAYC[339]DAK                     | 1 |
|                                                                                                                                                                                                                                                                               |      |       |      |      |   |   | 2 | QRQEVK[339]QSYK                               | 1 |
|                                                                                                                                                                                                                                                                               |      |       |      |      |   |   | 2 | QRQEVK[330]QSYK                               | 1 |
|                                                                                                                                                                                                                                                                               |      |       |      |      |   |   | 2 | M[147]LVVLLQGTR                               | 1 |
| AOFA_HUMAN (P21397) Amine oxidase [flavin-containing] A (EC 1.4.3.4) (Monoamine oxidase type A) (MAO-A) [MASS=59681]                                                                                                                                                          | 0.72 | 6.64  | 1.64 | 0.00 | 1 | 3 | 1 | KIC[339]ELYAK                                 | 1 |
|                                                                                                                                                                                                                                                                               |      |       |      |      |   |   | 2 | NQLIQRLPM[147]GAVIKC[330]MMYYK                | 1 |
|                                                                                                                                                                                                                                                                               |      |       |      |      |   |   | 1 | IC[339]ELYAK                                  | 2 |
| AOFB_HUMAN (P27338) Amine oxidase [flavin-containing] B (EC 1.4.3.4) (Monoamine oxidase type B) (MAO-B) [MASS=58631]                                                                                                                                                          | *    | 1.16  | *    | *    | * | 1 | 1 | C[330]IVYYK                                   | 1 |
| AP1B1_HUMAN (Q10567) AP-1 complex subunit beta-1 (Adapter-related protein complex 1 beta-1 subunit) (Beta-adaptin 1) (Adaptor protein complex AP-1 beta-1 subunit) (Golgi adaptor HA1/AP1 adaptin beta subunit) (Clathrin assembly protein complex 1 beta larg) [MASS=104606] | 1.00 | 3.06  | *    | *    | * | 3 | 2 | C[330]LKDEDPYVRK                              | 1 |
|                                                                                                                                                                                                                                                                               |      |       |      |      |   |   | 2 | C[330]VSTLLDLIQTK                             | 1 |
|                                                                                                                                                                                                                                                                               |      |       |      |      |   |   | 2 | TM[147]GC[330]JIR                             | 1 |

|                                                                                                                                                                                                                                                                               |      |       |      |      |   |   |   |                                           |   |
|-------------------------------------------------------------------------------------------------------------------------------------------------------------------------------------------------------------------------------------------------------------------------------|------|-------|------|------|---|---|---|-------------------------------------------|---|
| AP2A1_HUMAN (O95782) AP-2 complex subunit alpha-1 (Adapter-related protein complex 2 alpha-1 subunit) (Alpha-adaptin A) (Adaptor protein complex AP-2 alpha-1 subunit) (Clathrin assembly protein complex 2 alpha-A large chain) (100 kDa coated vesicle prote [MASS=107554]) | 1.00 | 10.95 | 0.83 | 0.13 | 6 | 7 | 3 | EM[147]GEAFAADIPR                         | 1 |
|                                                                                                                                                                                                                                                                               |      |       |      |      |   |   | 2 | AC[339]NQLGQFLQHR                         | 1 |
|                                                                                                                                                                                                                                                                               |      |       |      |      |   |   | 2 | AC[330]NQLGQFLQHR                         | 1 |
|                                                                                                                                                                                                                                                                               |      |       |      |      |   |   | 2 | TVFEALQAPAC[339]HENM[147]VK               | 1 |
|                                                                                                                                                                                                                                                                               |      |       |      |      |   |   | 2 | FHLC[330]SVATR                            | 2 |
|                                                                                                                                                                                                                                                                               |      |       |      |      |   |   | 1 | SKFKGDK                                   | 1 |
| AP2A2_HUMAN (O94973) AP-2 complex subunit alpha-2 (Adapter-related protein complex 2 alpha-2 subunit) (Alpha-adaptin C) (Adaptor protein complex AP-2 alpha-2 subunit) (Clathrin assembly protein complex 2 alpha-C large chain) (100 kDa coated vesicle prote [MASS=103960]) | 0.25 | 4.47  | 1.77 | 0.00 | 1 | 2 | 2 | AVDLLYAMC[339]DR                          | 1 |
|                                                                                                                                                                                                                                                                               |      |       |      |      |   |   | 3 | LSRIVTSASTDLQDYTYFVPAPWLSVKLLR            | 1 |
|                                                                                                                                                                                                                                                                               |      |       |      |      |   |   |   |                                           |   |
| AP2B1_HUMAN (P63010) AP-2 complex subunit beta-1 (Adapter-related protein complex 2 beta-1 subunit) (Beta-adaptin) (Plasma membrane adaptor HA2/AP2 adaptin beta subunit) (Clathrin assembly protein complex 2 beta large chain) (AP105B) [MASS=104552])                      | 1.00 | 5.12  | 0.77 | 0.16 | 3 | 2 | 3 | VIAAM[147]TVGKDVSSLFPDVVNC[330]MQTDNLELKK | 1 |
|                                                                                                                                                                                                                                                                               |      |       |      |      |   |   | 2 | FLELLPKDSDYNNM[147]LLK                    | 1 |
| AP2M1_HUMAN (Q96CW1) AP-2 complex subunit mu-1 (Adaptin mu-1) (AP-2 mu-2 chain) (Clathrin coat assembly protein AP50) (Clathrin coat-associated protein AP50) (Plasma membrane adaptor AP-2 50 kDa protein) (HA2 50 kDa subunit) (Clathrin assembly protein co [MASS=49654])  | 0.00 | 5.98  | 1.56 | 0.00 | 1 | 2 | 2 | QSI AIDDC[330]TFHQ C[330]VR               | 1 |
|                                                                                                                                                                                                                                                                               |      |       |      |      |   |   | 2 | MC[330]DVMAAYFGK                          | 1 |
| APCD1_HUMAN (Q8J025) Protein APCDD1 precursor (Adenomatosis polyposis coli down-regulated 1 protein) [MASS=58796])                                                                                                                                                            | *    | 6.42  | *    | *    | * | 2 | 1 | LGQQVNR                                   | 1 |
|                                                                                                                                                                                                                                                                               |      |       |      |      |   |   | 3 | MFYRPSSYQPPLQNAKNHDHAC[339]IAC[330]R      | 1 |
| APMAP_HUMAN (Q9HDC9) Adipocyte plasma membrane-associated protein (BSCv protein) [MASS=46480])                                                                                                                                                                                | 0.00 | 5.53  | 0.81 | 0.00 | 1 | 2 | 1 | VYVSGLM[147]K                             | 2 |
|                                                                                                                                                                                                                                                                               |      |       |      |      |   |   | 2 | TRDEPVC[330]GRPLGIR                       | 1 |
| APOD_HUMAN (P05090) Apolipoprotein D precursor (Apo-D) (ApoD) [MASS=21275])                                                                                                                                                                                                   | 1.00 | 6.35  | 1.58 | 0.00 | 2 | 1 | 2 | KM[147]TVTDQVNC[330]PK                    | 1 |
|                                                                                                                                                                                                                                                                               |      |       |      |      |   |   | 2 | KM[147]TVTDQVNC[339]PK                    | 1 |

|                                                                                                                                                                                                                                  |      |       |      |      |   |   |   |                                                                                                                       |             |
|----------------------------------------------------------------------------------------------------------------------------------------------------------------------------------------------------------------------------------|------|-------|------|------|---|---|---|-----------------------------------------------------------------------------------------------------------------------|-------------|
| AR6P1_HUMAN (Q15041) ARL-6-interacting protein 1 (ADP-ribosylation-like factor 6-interacting protein 1) (Aip-1) [MASS=23363]                                                                                                     | 0.00 | 11.33 | 1.19 | 0.00 | 1 | 2 | 2 | FHEIC[339]SNLVK<br>2 FHEIC[339]SNLVKTRR                                                                               | 1<br>1      |
| ARHG2_HUMAN (Q92974) Rho/Rac guanine nucleotide exchange factor 2 (GEF-H1 protein) (Proliferating cell nucleolar antigen p40) [MASS=101173]                                                                                      | 0.39 | 1.46  | 1.36 | 0.00 | 1 | 1 | 2 | HGVQEC[330]ILLVTQR                                                                                                    | 1           |
| ARI1B_HUMAN (Q8NFD5) AT-rich interactive domain-containing protein 1B (ARID domain-containing protein 1B) (Osa homolog 2) (hOsa2) (p250R) (BRG1-binding protein hELD/OSA1) (BRG1-associated factor 250b) (BAF250B) [MASS=236122] | *    | 3.35  | *    | *    | * | 3 | 2 | RC[330]IC[330]VSNIVRSLSFVPGNDAEM[147]SK<br>3 RNSM[147]TPNAPYQQGM[147]SM[147]PDVMGRMPYEPNK<br>3 RNSMTPNAPYQQGMSMPDVMGR | 1<br>1<br>1 |
| ARI4A_HUMAN (P29374) AT-rich interactive domain-containing protein 4A (ARID domain-containing protein 4A) (Retinoblastoma-binding protein 1) (RBBP-1) [MASS=142666]                                                              | *    | 2.47  | *    | *    | * | 2 | 2 | TSDC[339]IGSEGMKLNLFQHFER<br>2 RRLNDELLGK                                                                             | 1<br>1      |
| ARID2_HUMAN (Q68CP9) AT-rich interactive domain-containing protein 2 (ARID domain-containing protein 2) (BRG1-associated factor 200) (BAF200) [MASS=197390]                                                                      | *    | 2.45  | *    | *    | * | 2 | 3 | VGVRIVTISDPNAGC[330]SATMVAVPAGADPSTVAK<br>3 KIEVMENPSC[339]R                                                          | 1<br>1      |
| ARL4C_HUMAN (P56559) ADP-ribosylation factor-like protein 4C (ADP-ribosylation factor-like protein 7) (ADP-ribosylation factor-like protein LAK) [MASS=21487]                                                                    | 0.00 | 13.54 | 0.32 | 0.00 | 1 | 1 | 3 | C[330]TDGIIVVDSVDVDRLEEAKTELHK                                                                                        | 1           |
| ARMX3_HUMAN (Q9UH62) Armadillo repeat-containing X-linked protein 3 (Protein ALEX3) (ARM protein lost in epithelial cancers on chromosome X 3) [MASS=42500]                                                                      | *    | 10.55 | *    | *    | * | 2 | 3 | FM[147]AKLAEHM[147]FPKSQE<br>2 PYILEAALIALGNNAAYAFNRDIIR                                                              | 1<br>1      |

|                                                                                                                                                                                                                                                                               |      |      |      |      |   |   |                |                                      |   |
|-------------------------------------------------------------------------------------------------------------------------------------------------------------------------------------------------------------------------------------------------------------------------------|------|------|------|------|---|---|----------------|--------------------------------------|---|
| ARTS1_HUMAN (Q9NZ08) Adipocyte-derived leucine aminopeptidase precursor (EC 3.4.11.-) (A-LAP) (ARTS-1) (Aminopeptidase PILS) (Puromycin-insensitive leucyl-specific aminopeptidase) (PILS-AP) (Type 1 tumor necrosis factor receptor shedding aminopeptidase r [MASS=105846]) | *    | 4.63 | *    | *    | * | 2 | 2              | SGVKVSVYAVPDK                        | 1 |
|                                                                                                                                                                                                                                                                               |      |      |      |      |   |   | 3              | EGELRILASTQFEPTAARMAFPC[330]FDEPAFK  | 1 |
|                                                                                                                                                                                                                                                                               |      |      |      |      |   |   |                |                                      |   |
| ARX_HUMAN (Q96QS3) Homeobox protein ARX (Aristaless-related homeobox) [MASS=58160]                                                                                                                                                                                            | *    | 2.14 | *    | *    | * | 1 | 2              | ADPEKAVQGSPK                         | 4 |
|                                                                                                                                                                                                                                                                               |      |      |      |      |   |   |                |                                      |   |
| ASB10_HUMAN (Q8WXI3) Ankyrin repeat and SOCS box protein 10 (ASB-10) [MASS=46609]                                                                                                                                                                                             | *    | 2.10 | *    | *    | * | 1 | 1              | VWPGALPKK                            | 1 |
| AT12A_HUMAN (P54707) Potassium-transporting ATPase alpha chain 2 (EC 3.6.3.10) (Proton pump) (Non-gastric H(+)/K(+) ATPase subunit alpha) [MASS=115898]                                                                                                                       | 0.00 | 0.58 | *    | *    | * | 1 | 2              | KNC[330]LVK                          | 2 |
|                                                                                                                                                                                                                                                                               |      |      |      |      |   |   | 2              | KNC[339]LVK                          | 1 |
| AT131_HUMAN (Q9HD20) Probable cation-transporting ATPase 13A1 (EC 3.6.3.-) [MASS=132954]                                                                                                                                                                                      | 0.00 | 2.82 | 1.08 | 0.00 | 1 | 2 | 2              | SPQENLVPC[339]DVLLLR                 | 1 |
|                                                                                                                                                                                                                                                                               |      |      |      |      |   |   | 3              | KFGSNTAEMVVPDFSELFK                  | 1 |
| AT1A1_HUMAN (P05023) Sodium/potassium-transporting ATPase alpha-1 chain precursor (EC 3.6.3.9) (Sodium pump 1) (Na+/K+ ATPase 1) [MASS=112895]                                                                                                                                |      |      |      |      |   |   | 2              | NIAFFSTNC[330]VEGTAR                 | 1 |
|                                                                                                                                                                                                                                                                               |      |      |      |      |   |   | 2              | C[339]SSILLHGK                       | 1 |
|                                                                                                                                                                                                                                                                               |      |      |      |      |   |   | 2              | NLEAVETLGSTSTIC[330]SDKTGTLTQNR      | 1 |
|                                                                                                                                                                                                                                                                               |      |      |      |      |   |   | 2              | IAGLC[330]NR                         | 1 |
|                                                                                                                                                                                                                                                                               |      |      |      |      |   |   | 2              | NLEAVETLGSTSTIC[330]SDK              | 1 |
|                                                                                                                                                                                                                                                                               |      |      |      |      |   |   | 2              | ILDRC[339]SSILLHGK                   | 1 |
|                                                                                                                                                                                                                                                                               |      |      |      |      |   |   | 2              | IISANGC[339]K                        | 1 |
|                                                                                                                                                                                                                                                                               |      |      |      |      |   |   | 1              | IISANGC[330]K                        | 1 |
|                                                                                                                                                                                                                                                                               |      |      |      |      |   |   | 2              | AC[330]VVHGSDLK                      | 1 |
|                                                                                                                                                                                                                                                                               |      |      |      |      |   |   | 2              | C[330]SSILLHGK                       | 1 |
|                                                                                                                                                                                                                                                                               |      |      |      |      |   |   | 3              | IPADLR IISANGC[330]KVDNSSLTGSESEPQTR | 1 |
|                                                                                                                                                                                                                                                                               |      |      |      |      |   |   | 2              | AC[339]VVHGSDLK                      | 1 |
|                                                                                                                                                                                                                                                                               |      |      |      |      |   |   | 2              | IISANGC[330]K                        | 1 |
|                                                                                                                                                                                                                                                                               |      |      |      |      |   | 1 | C[330]SSILLHGK | 2                                    |   |
|                                                                                                                                                                                                                                                                               |      |      |      |      |   | 1 | C[339]SSILLHGK | 1                                    |   |

|                                                                                                                                                                            |      |       |      |      |    |    |   |                                      |   |
|----------------------------------------------------------------------------------------------------------------------------------------------------------------------------|------|-------|------|------|----|----|---|--------------------------------------|---|
| AT1A2_HUMAN (P50993) Sodium/potassium-transporting ATPase alpha-2 chain precursor (EC 3.6.3.9) (Sodium pump 2) (Na <sup>+</sup> /K <sup>+</sup> ATPase 2) [MASS=112265]    | 1.00 | 2.25  | 0.52 | 0.01 | 2  | 2  | 2 | IISSHGC[330]K                        | 1 |
|                                                                                                                                                                            |      |       |      |      |    |    | 2 | NIC[330]FFSTNC[330]VEGTAR            | 1 |
|                                                                                                                                                                            |      |       |      |      |    |    | 2 | YNTDC[339]VQGLTHSK                   | 1 |
|                                                                                                                                                                            |      |       |      |      |    |    | 2 | KYNTDC[330]VQGLTHSK                  | 2 |
|                                                                                                                                                                            |      |       |      |      |    |    | 2 | NITFFSTNC[330]VEGTAR                 | 2 |
|                                                                                                                                                                            |      |       |      |      |    |    | 2 | VLGFC[330]HYLPEEQFPK                 | 2 |
|                                                                                                                                                                            |      |       |      |      |    |    | 2 | AC[330]VIHGTDLK                      | 1 |
|                                                                                                                                                                            |      |       |      |      |    |    | 2 | M[147]SVEEVC[330]R                   | 1 |
|                                                                                                                                                                            |      |       |      |      |    |    | 1 | C[330]IELSSGSVK                      | 2 |
|                                                                                                                                                                            |      |       |      |      |    |    | 2 | C[330]IELSSGSVK                      | 1 |
| AT1A3_HUMAN (P13637) Sodium/potassium-transporting ATPase alpha-3 chain (EC 3.6.3.9) (Sodium pump 3) (Na <sup>+</sup> /K <sup>+</sup> ATPase 3) (Alpha(III)) [MASS=111734] | 1.00 | 15.40 | 0.51 | 0.30 | 29 | 12 | 1 | C[330]STILLQGK                       | 1 |
|                                                                                                                                                                            |      |       |      |      |    |    | 2 | SPDC[339]THDNPLETR                   | 2 |
|                                                                                                                                                                            |      |       |      |      |    |    | 3 | AC[330]VIHGTDLKDFTSEQIDEILQNHTEIVFAR | 1 |
|                                                                                                                                                                            |      |       |      |      |    |    | 1 | SPDC[330]THDNPLETR                   | 1 |
|                                                                                                                                                                            |      |       |      |      |    |    | 2 | VLGFC[339]HYLPEEQFPK                 | 2 |
|                                                                                                                                                                            |      |       |      |      |    |    | 2 | NITFFSTNC[339]VEGTAR                 | 1 |
|                                                                                                                                                                            |      |       |      |      |    |    | 1 | IISAHGC[330]K                        | 2 |
|                                                                                                                                                                            |      |       |      |      |    |    | 2 | YNTDC[330]VQGLTHSK                   | 1 |
|                                                                                                                                                                            |      |       |      |      |    |    | 2 | IISAHGC[339]K                        | 1 |
|                                                                                                                                                                            |      |       |      |      |    |    | 2 | KYNTDC[339]VQGLTHSK                  | 1 |
|                                                                                                                                                                            |      |       |      |      |    |    | 2 | M[147]SVEEVC[330]RK                  | 1 |
|                                                                                                                                                                            |      |       |      |      |    |    | 2 | SPDC[330]THDNPLETR                   | 2 |
|                                                                                                                                                                            |      |       |      |      |    |    | 2 | M[147]SVEEVC[339]R                   | 1 |

|                                                                                                                                                                                                                                                                              |      |       |      |      |    |   |  |   |                                     |   |
|------------------------------------------------------------------------------------------------------------------------------------------------------------------------------------------------------------------------------------------------------------------------------|------|-------|------|------|----|---|--|---|-------------------------------------|---|
|                                                                                                                                                                                                                                                                              |      |       |      |      |    |   |  | 2 | YNPNVLPVQC[330]TGKR                 | 2 |
|                                                                                                                                                                                                                                                                              |      |       |      |      |    |   |  | 3 | DSAQRDDM[147]IFEDC[330]GDVPSEPKER   | 1 |
|                                                                                                                                                                                                                                                                              |      |       |      |      |    |   |  | 3 | YKDSAQRDDM[147]IFEDC[339]GDVPSEPK   | 1 |
|                                                                                                                                                                                                                                                                              |      |       |      |      |    |   |  | 1 | YNPNVLPVQC[330]TGK                  | 2 |
| AT1B1_HUMAN (P05026) Sodium/potassium-transporting ATPase subunit beta-1 (Sodium/potassium-dependent ATPase beta-1 subunit) [MASS=35061]                                                                                                                                     | 1.00 | 36.96 | 0.53 | 0.22 | 10 | 6 |  | 2 | DSAQRDDM[147]IFEDC[330]GDVPSEPK     | 1 |
|                                                                                                                                                                                                                                                                              |      |       |      |      |    |   |  | 2 | YNPNVLPVQC[330]TGK                  | 2 |
|                                                                                                                                                                                                                                                                              |      |       |      |      |    |   |  | 2 | DDM[147]IFEDC[330]GDVPSEPKER        | 1 |
|                                                                                                                                                                                                                                                                              |      |       |      |      |    |   |  | 2 | YNPNVLPVQC[339]TGK                  | 1 |
| AT2A2_HUMAN (P16615) Sarcoplasmic/endoplasmic reticulum calcium ATPase 2 (EC 3.6.3.8) (Calcium pump 2) (SERCA2) (SR Ca(2+)-ATPase 2) (Calcium-transporting ATPase sarcoplasmic reticulum type, slow twitch skeletal muscle isoform) (Endoplasmic reticulum cla [MASS=114756] | 1.00 | 4.41  | 1.05 | 0.12 | 7  | 4 |  | 2 | C[339]THIR                          | 1 |
|                                                                                                                                                                                                                                                                              |      |       |      |      |    |   |  | 2 | VSFYQLSHFLQC[330]JK                 | 1 |
|                                                                                                                                                                                                                                                                              |      |       |      |      |    |   |  | 2 | NYLEPGKEC[330]VQPATK                | 1 |
|                                                                                                                                                                                                                                                                              |      |       |      |      |    |   |  | 2 | VSFYQLSHFLQC[339]JK                 | 1 |
|                                                                                                                                                                                                                                                                              |      |       |      |      |    |   |  | 2 | SMSVYC[339]TPNKPSR                  | 1 |
|                                                                                                                                                                                                                                                                              |      |       |      |      |    |   |  | 2 | SM[147]SVYC[339]TPNKPSR             | 1 |
|                                                                                                                                                                                                                                                                              |      |       |      |      |    |   |  | 2 | SM[147]SVYC[330]TPNKPSR             | 1 |
| AT2A3_HUMAN (Q93084) Sarcoplasmic/endoplasmic reticulum calcium ATPase 3 (EC 3.6.3.8) (Calcium pump 3) (SERCA3) (SR Ca(2+)-ATPase 3) [MASS=113977]                                                                                                                           | *    | 2.88  | *    | *    | *  | 1 |  | 3 | FPTTMALSVLVTIEMC[339]NALNSVSENQSLLR | 1 |
| AT2B1_HUMAN (P20020) Plasma membrane calcium-transporting ATPase 1 (EC 3.6.3.8) (PMCA1) (Plasma membrane calcium pump isoform 1) (Plasma membrane calcium ATPase isoform 1) [MASS=138754]                                                                                    | 0.99 | 6.76  | 0.48 | 0.21 | 2  | 5 |  | 2 | HLDAC[330]ETM[147]GNATAIC[330]SDK   | 1 |
|                                                                                                                                                                                                                                                                              |      |       |      |      |    |   |  | 2 | AGLLM[147]SAITVILVLYFVIDTFWWQKR     | 1 |
|                                                                                                                                                                                                                                                                              |      |       |      |      |    |   |  | 2 | KIQESYGDVYGIC[330]TK                | 1 |
|                                                                                                                                                                                                                                                                              |      |       |      |      |    |   |  | 2 | SSPTDKHTLVK                         | 1 |
|                                                                                                                                                                                                                                                                              |      |       |      |      |    |   |  | 3 | TEC[330]ALLGLLLDLKR                 | 1 |
| AT2B2_HUMAN (Q01814) Plasma membrane calcium-transporting ATPase 2 (EC 3.6.3.8) (PMCA2) (Plasma membrane calcium pump isoform 2) (Plasma membrane calcium ATPase isoform 2) [MASS=136875]                                                                                    | 1.00 | 10.62 | 0.64 | 0.09 | 4  | 7 |  | 2 | IKETYGDTEAIC[330]R                  | 1 |
|                                                                                                                                                                                                                                                                              |      |       |      |      |    |   |  | 2 | TEC[330]GLLGFVLDLKQDYEPVR           | 1 |
|                                                                                                                                                                                                                                                                              |      |       |      |      |    |   |  | 3 | TEC[330]GLLGFVLDLKQDYEPVR           | 1 |
|                                                                                                                                                                                                                                                                              |      |       |      |      |    |   |  | 3 | KQIFGQNFIPPK                        | 1 |
|                                                                                                                                                                                                                                                                              |      |       |      |      |    |   |  | 1 | MYSKGASEIVLKK                       | 1 |
|                                                                                                                                                                                                                                                                              |      |       |      |      |    |   |  | 2 | C[330]GIIHPGEDFLC[330]LEGK          | 1 |
|                                                                                                                                                                                                                                                                              |      |       |      |      |    |   |  | 2 | KSVDKDPM[147]LLSGTHVM[147]EGSGR     | 1 |
|                                                                                                                                                                                                                                                                              |      |       |      |      |    |   |  | 3 | LTKLAVQIGKAGLVMSAITVILVLYFTVDTFVVK  | 1 |

|                                                                                                                                                                                                                                                                              |      |      |      |      |   |   |   |                                          |   |
|------------------------------------------------------------------------------------------------------------------------------------------------------------------------------------------------------------------------------------------------------------------------------|------|------|------|------|---|---|---|------------------------------------------|---|
| AT2B4_HUMAN (P23634) Plasma membrane calcium-transporting ATPase 4 (EC 3.6.3.8) (PMCA4) (Plasma membrane calcium pump isoform 4) (Plasma membrane calcium ATPase isoform 4) [MASS=137919]                                                                                    | 1.00 | 3.14 | 0.59 | 0.11 | 4 | 2 | 3 | TEC[330]ALLGFVTDLKQDYQAVR                | 2 |
|                                                                                                                                                                                                                                                                              |      |      |      |      |   |   | 2 | TEC[330]ALLGFVTDLKQDYQAVR                | 1 |
|                                                                                                                                                                                                                                                                              |      |      |      |      |   |   | 2 | DALTQINVHYGGVQNLQ[330]SR                 | 1 |
| AT2C1_HUMAN (P98194) Calcium-transporting ATPase type 2C member 1 (EC 3.6.3.8) (ATPase 2C1) (ATP-dependent Ca(2+) pump PMR1) [MASS=100577]                                                                                                                                   | *    | 5.22 | *    | *    | * | 2 | 2 | C[339]GKAKGVVIGTGENSEFGEVFK              | 1 |
|                                                                                                                                                                                                                                                                              |      |      |      |      |   |   | 3 | GVVIGTGENSEFGEVFKM[147]M[147]QAEAPK      | 1 |
| AT5F1_HUMAN (P24539) ATP synthase B chain, mitochondrial precursor (EC 3.6.3.14) [MASS=28908]                                                                                                                                                                                | 0.77 | 2.34 | 1.94 | 0.00 | 1 | 1 | 1 | C[339]IADLK                              | 3 |
|                                                                                                                                                                                                                                                                              |      |      |      |      |   |   | 1 | C[330]IADLK                              | 1 |
| AT8A1_HUMAN (Q9Y2Q0) Probable phospholipid-transporting ATPase IA (EC 3.6.3.1) (Chromaffin granule ATPase II) (ATPase class I type 8A member 1) [MASS=131368]                                                                                                                | 0.99 | 4.81 | 0.79 | 0.00 | 1 | 3 | 3 | KNM[147]GM[147]IVINEGSLDGTR              | 2 |
|                                                                                                                                                                                                                                                                              |      |      |      |      |   |   | 2 | SESLQQLLHGAYAFSQDENGIVSQSEVIR            | 1 |
|                                                                                                                                                                                                                                                                              |      |      |      |      |   |   | 2 | FC[330]NNHVSTAK                          | 1 |
| ATD3A_HUMAN (Q9NVI7) ATPase family AAA domain-containing protein 3A [MASS=71369]                                                                                                                                                                                             | 0.00 | 5.84 | 1.55 | 0.00 | 1 | 2 | 2 | KC[339]SEVAR                             | 1 |
|                                                                                                                                                                                                                                                                              |      |      |      |      |   |   | 3 | LALHSGM[147]DYAIM[147]TGGDVAPMGREGVTAMHK | 1 |
| ATD3B_HUMAN (Q5T9A4) ATPase family AAA domain-containing protein 3B [MASS=72572]                                                                                                                                                                                             | 0.00 | 3.86 | *    | *    | * | 1 | 3 | DGVLTEAM[147]MDAC[339]VQDAVQQYRQKM[147]R | 1 |
| ATF6B_HUMAN (Q99941) Cyclic AMP-dependent transcription factor ATF-6 beta (Activating transcription factor 6 beta) (ATF6-beta) (cAMP-responsive element-binding protein-like 1) (cAMP response element-binding protein-related protein) (Creb-rp) (Protein G13) [MASS=76709] | 0.24 | 6.97 | 1.31 | 0.00 | 1 | 2 | 3 | VVC[339]IM[147]VLLFIAFNFGPVSISEPPSAPISPR | 1 |
|                                                                                                                                                                                                                                                                              |      |      |      |      |   |   | 3 | SEPSSPC[339]SSSSLSESSR                   | 1 |
| ATF7_HUMAN (P17544) Cyclic AMP-dependent transcription factor ATF-7 (Activating transcription factor 7) (Transcription factor ATF-A) [MASS=52967]                                                                                                                            | 0.00 | 4.25 | 0.77 | 0.00 | 1 | 1 | 2 | NC[330]EEVGLFNECLASSFEHEFKK              | 1 |



|                                                                                                                                                  |      |       |      |      |    |   |   |   |                                           |   |
|--------------------------------------------------------------------------------------------------------------------------------------------------|------|-------|------|------|----|---|---|---|-------------------------------------------|---|
|                                                                                                                                                  |      |       |      |      |    |   |   | 2 | YSQIC[339]AK                              | 2 |
| ATP5E_HUMAN (P56381) ATP synthase epsilon chain, mitochondrial (EC 3.6.3.14) [MASS=5649]                                                         | 1.00 | 14.00 | 1.78 | 0.01 | 6  | 1 | 1 | 1 | YSQIC[330]AK                              | 1 |
|                                                                                                                                                  |      |       |      |      |    |   | 1 | 1 | YSQIC[339]AK                              | 3 |
|                                                                                                                                                  |      |       |      |      |    |   |   | 2 | YSQIC[330]AK                              | 1 |
| ATP8_HUMAN (P03928) ATP synthase protein 8 (EC 3.6.3.14) (ATPase subunit 8) (A6L) [MASS=7992]                                                    | 1.00 | 16.18 | 1.94 | 0.04 | 3  | 1 | 2 | 2 | IC[339]SLHSLPPQS                          | 2 |
|                                                                                                                                                  |      |       |      |      |    |   | 1 | 1 | IC[339]SLHSLPPQS                          | 1 |
|                                                                                                                                                  |      |       |      |      |    |   |   | 2 | LYC[339]IYVAIGQK                          | 2 |
|                                                                                                                                                  |      |       |      |      |    |   | 1 | 1 | LYC[339]IYVAIGQK                          | 3 |
|                                                                                                                                                  |      |       |      |      |    |   |   | 2 | YTIVVSATASDAAPLQYLAPYSGC[339]SM[147]GEYFR | 1 |
| ATPA_HUMAN (P25705) ATP synthase alpha chain, mitochondrial precursor (EC 3.6.3.14) [MASS=59750]                                                 | 1.00 | 13.74 | 1.80 | 0.04 | 13 | 4 | 1 | 1 | LYC[330]IYVAIGQK                          | 3 |
|                                                                                                                                                  |      |       |      |      |    |   |   | 3 | YTIVVSATASDAAPLQYLAPYSGC[339]SM[147]GEYFR | 1 |
|                                                                                                                                                  |      |       |      |      |    |   | 1 | 1 | AVDSLVPPIGRGQR                            | 1 |
|                                                                                                                                                  |      |       |      |      |    |   | 2 | 2 | EPMQTGIKAVDSLVPPIGRGQR                    | 1 |
|                                                                                                                                                  |      |       |      |      |    |   | 3 | 3 | YTIVVSATASDAAPLQYLAPYSGC[339]SMGEYFR      | 1 |
|                                                                                                                                                  |      |       |      |      |    |   | 2 | 2 | LYC[330]IYVAIGQK                          | 2 |
|                                                                                                                                                  |      |       |      |      |    |   |   | 1 | GLC[339]GAIHSSIAK                         | 4 |
| ATPG_HUMAN (P36542) ATP synthase gamma chain, mitochondrial precursor (EC 3.6.3.14) [MASS=32996]                                                 | 1.00 | 4.03  | 1.88 | 0.01 | 10 | 1 | 1 | 1 | GLC[330]GAIHSSIAK                         | 2 |
|                                                                                                                                                  |      |       |      |      |    |   |   | 2 | GLC[330]GAIHSSIAK                         | 2 |
|                                                                                                                                                  |      |       |      |      |    |   |   | 2 | GLC[339]GAIHSSIAK                         | 2 |
| ATPO_HUMAN (P48047) ATP synthase O subunit, mitochondrial precursor (EC 3.6.3.14) (Oligomycin sensitivity conferral protein) (OSCP) [MASS=23277] | 0.00 | 17.84 | 2.12 | 0.00 | 1  | 2 | 2 | 2 | GEVPC[339]TVTSASPLEEATLSELK               | 1 |
|                                                                                                                                                  |      |       |      |      |    |   | 3 | 3 | LEAKTDPSILGGM[147]IVR                     | 1 |
| ATRIP_HUMAN (Q8WXE1) ATR-interacting protein (ATM and Rad3-related-interacting protein) [MASS=85837]                                             | 0.00 | 4.80  | 1.64 | 0.00 | 1  | 2 | 3 | 3 | MLLHLLAFSSAATGHLQASVLTQC[330]LK           | 1 |
|                                                                                                                                                  |      |       |      |      |    |   | 3 | 3 | RAGGPPRTDQQR                              | 1 |

|                                                                                                                                                                                           |      |      |      |      |   |   |   |                                              |   |
|-------------------------------------------------------------------------------------------------------------------------------------------------------------------------------------------|------|------|------|------|---|---|---|----------------------------------------------|---|
| ATRN_HUMAN (O75882) Attractin precursor (Mahogany homolog) (DPPT-L) [MASS=158536]                                                                                                         | *    | 3.43 | *    | *    | * | 2 | 3 | DKIYM[147]YGGKIDSTGNVTNELR                   | 1 |
|                                                                                                                                                                                           |      |      |      |      |   |   | 3 | PFASVNVVALETDEEPPDLIGGSIKTVPK                | 1 |
| ATS16_HUMAN (Q8TE57) ADAMTS-16 precursor (EC 3.4.24.-) (A disintegrin and metalloproteinase with thrombospondin motifs 16) (ADAM-TS 16) (ADAM-TS16) [MASS=136187]                         | *    | 4.33 | *    | *    | * | 3 | 3 | AVAC[339]KSTNPSAR                            | 2 |
|                                                                                                                                                                                           |      |      |      |      |   |   | 3 | RAVAVSEVESLHLR                               | 1 |
|                                                                                                                                                                                           |      |      |      |      |   |   | 3 | VSAC[330]PPSWSVGNWSAC[330]SRTC[339]GGGAQSR   | 1 |
| ATS17_HUMAN (Q8TE56) ADAMTS-17 precursor (EC 3.4.24.-) (A disintegrin and metalloproteinase with thrombospondin motifs 17) (ADAM-TS 17) (ADAM-TS17) [MASS=121099]                         | 0.00 | 5.48 | 0.18 | 0.00 | 1 | 3 | 2 | GLQSRVVQC[330]MHK                            | 1 |
|                                                                                                                                                                                           |      |      |      |      |   |   | 2 | WSLTPSPSAEAQRPEQLC[330]K                     | 1 |
|                                                                                                                                                                                           |      |      |      |      |   |   | 3 | TPIPEHVDGDWSPWGAWSM[147]C[330]SRTC[330]GTGAR | 1 |
| ATX7_HUMAN (O15265) Ataxin-7 (Spinocerebellar ataxia type 7 protein) [MASS=95451]                                                                                                         | 0.00 | 9.53 | 0.23 | 0.00 | 1 | 4 | 2 | C[330]ALNLMVEK                               | 1 |
|                                                                                                                                                                                           |      |      |      |      |   |   | 3 | VPAVNNVHMKHTGTIPGAQGLMNSSLLHQP KAR           | 1 |
|                                                                                                                                                                                           |      |      |      |      |   |   | 2 | GGASGNSRSSSGVLSASSSSSK                       | 1 |
|                                                                                                                                                                                           |      |      |      |      |   |   | 3 | PPLAVPPTSVFVFFP SLSK                         | 1 |
| B3A4_HUMAN (Q96Q91) Anion exchange protein 4 (Anion exchanger 4) (Solute carrier family 4 member 9) (Sodium bicarbonate cotransporter 5) [MASS=108247]                                    | *    | 1.83 | *    | *    | * | 1 | 2 | VKLLLM[147]PAKHQP DLLLLR                     | 1 |
| BAI1_HUMAN (O14514) Brain-specific angiogenesis inhibitor 1 precursor [MASS=173532]                                                                                                       | 0.00 | 2.59 | 0.09 | 0.00 | 1 | 2 | 3 | VTVSKSVFSTGLTEADEASV FVVGTVLYR               | 1 |
|                                                                                                                                                                                           |      |      |      |      |   |   | 3 | QC[330]NREAC[330]GPAGR                       | 1 |
| BAZ2A_HUMAN (Q9UIF9) Bromodomain adjacent to zinc finger domain 2A (Transcription termination factor I-interacting protein 5) (TTF-I-interacting protein 5) (Tip5) (hWALp3) [MASS=208360] | *    | 0.96 | *    | *    | * | 1 | 2 | KLLHSSQMLRAVSLGQDR                           | 1 |
| BBS2_HUMAN (Q9BXC9) Bardet-Biedl syndrome 2 protein [MASS=79870]                                                                                                                          | 0.00 | 3.33 | 0.49 | 0.00 | 1 | 1 | 3 | EDEIVAEMTETEIVTSLC[330]PMYGSR                | 1 |
| BC11B_HUMAN (Q9C0K0) B-cell lymphoma/leukemia 11B (B-cell CLL/lymphoma 11B) (Radiation-induced tumor suppressor gene 1 protein) (hRit1) (COUP-TF-interacting protein 2) [MASS=95519]      | 0.00 | 1.90 | 0.33 | 0.00 | 1 | 1 | 2 | KQC[330]GGSLGAC[330]YDKALDK                  | 1 |

|                                                                                                                                                                                                                                              |                        |       |      |      |   |   |   |                                          |   |
|----------------------------------------------------------------------------------------------------------------------------------------------------------------------------------------------------------------------------------------------|------------------------|-------|------|------|---|---|---|------------------------------------------|---|
| BCAR1_HUMAN (P56945) Breast cancer anti-estrogen resistance protein 1 (CRK-associated substrate) (p130cas) [MASS=93361]                                                                                                                      | *                      | 1.72  | *    | *    | * | 1 | 2 | DPLLEVYDVPPSVEK                          | 1 |
| BDH_HUMAN (Q02338) D-beta-hydroxybutyrate dehydrogenase, mitochondrial precursor (EC 1.1.1.30) (BDH) (3-hydroxybutyrate dehydrogenase) [MASS=38157]                                                                                          | 1.00                   | 23.91 | 1.59 | 0.08 | 5 | 5 | 3 | METYC[339]SSGSTDTSVIDAVTHALTATTPYTR      | 1 |
|                                                                                                                                                                                                                                              |                        |       |      |      |   |   | 1 | SPYC[330]ITK                             | 1 |
|                                                                                                                                                                                                                                              |                        |       |      |      |   |   | 3 | VVNISMLGRMANPAR                          | 1 |
|                                                                                                                                                                                                                                              |                        |       |      |      |   |   | 3 | M[147]ETYC[339]SSGSTDTSVIDAVTHALTATTPYTR | 1 |
|                                                                                                                                                                                                                                              |                        |       |      |      |   |   | 3 | M[147]ETYC[330]SSGSTDTSVIDAVTHALTATTPYTR | 1 |
|                                                                                                                                                                                                                                              |                        |       |      |      |   |   | 2 | FGVEAFSDC[339]LR                         | 1 |
| 2                                                                                                                                                                                                                                            | AVLVTGC[339]DSGFGFSLAK | 1     |      |      |   |   |   |                                          |   |
| BHLH2_HUMAN (O14503) Class B basic helix-loop-helix protein 2 (bHLHB2) (Differentially expressed in chondrocytes protein 1) (DEC1) (Enhancer-of-split and hairy-related protein 2) (SHARP-2) (Stimulated with retinoic acid 13) [MASS=45510] | 0.00                   | 8.25  | 0.87 | 0.00 | 1 | 1 | 3 | NC[330]VPVIQRTFAHSSGEQSGSDTDTDSGYGGESEK  | 1 |
| BIRC1_HUMAN (Q13075) Baculoviral IAP repeat-containing protein 1 (Neuronal apoptosis inhibitory protein) [MASS=159581]                                                                                                                       | 0.00                   | 1.35  | 1.52 | 0.00 | 1 | 1 | 3 | C[339]NFFSDFGSLMTM[147]LVSC[339]KK       | 1 |
| BNC2_HUMAN (Q6ZN30) Zinc finger protein basonuclin-2 [MASS=122329]                                                                                                                                                                           | 0.00                   | 2.55  | 0.03 | 0.00 | 1 | 3 | 2 | RMGSASRK                                 | 1 |
|                                                                                                                                                                                                                                              |                        |       |      |      |   |   | 1 | GTLRVHYK                                 | 1 |
|                                                                                                                                                                                                                                              |                        |       |      |      |   |   | 2 | VPGC[330]NM[147]MFSSVR                   | 1 |
| BPA1_HUMAN (Q03001) Bullous pemphigoid antigen 1 isoforms 1/2/3/4/5/8 (230 kDa bullous pemphigoid antigen) (BPA) (Hemidesmosomal plaque protein) (Dystonia musculorum protein) (Dystonin) (Fragment) [MASS=372207]                           | 0.00                   | 2.18  | 0.06 | 0.00 | 1 | 4 | 2 | TGSELTVYEAQR                             | 1 |
|                                                                                                                                                                                                                                              |                        |       |      |      |   |   | 2 | TLSVFQAMENRM[147]LDRQK                   | 1 |
|                                                                                                                                                                                                                                              |                        |       |      |      |   |   | 3 | NPVPSAEEWM[147]LEGC[330]RASGGLKK         | 1 |
|                                                                                                                                                                                                                                              |                        |       |      |      |   |   | 3 | LNEELEKSNEC[330]AEMLKQK                  | 1 |
| BPAEB_HUMAN (Q8W XK8) Bullous pemphigoid antigen 1, isoform 7 (Bullous pemphigoid antigen) (BPA) (Hemidesmosomal plaque protein) (Dystonia musculorum protein) (Dystonin) (Fragment) [MASS=344987]                                           | *                      | 2.88  | *    | *    | * | 5 | 1 | HC[339]AKNIK                             | 1 |
|                                                                                                                                                                                                                                              |                        |       |      |      |   |   | 2 | QLGIIDNNTASILKNITLPDK                    | 1 |
|                                                                                                                                                                                                                                              |                        |       |      |      |   |   | 2 | LLETQLM[147]ISGLISPELRKC[330]FDLK        | 1 |
|                                                                                                                                                                                                                                              |                        |       |      |      |   |   | 3 | AFQQNLVSSALFSK                           | 1 |
|                                                                                                                                                                                                                                              |                        |       |      |      |   |   | 3 | FQDQFLGIAAINISLPGEQYGQK                  | 1 |

|                                                                                                                                                                                                                                         |      |       |      |      |   |   |   |                                                   |   |
|-----------------------------------------------------------------------------------------------------------------------------------------------------------------------------------------------------------------------------------------|------|-------|------|------|---|---|---|---------------------------------------------------|---|
| BRCA1_HUMAN (P38398) Breast cancer type 1 susceptibility protein (RING finger protein 53) [MASS=207720]                                                                                                                                 | 0.00 | 6.12  | 0.06 | 0.00 | 1 | 6 | 2 | YFLGIAGGK                                         | 1 |
|                                                                                                                                                                                                                                         |      |       |      |      |   |   | 2 | MSMVVSGLTPEEFM[147]LVYK                           | 1 |
|                                                                                                                                                                                                                                         |      |       |      |      |   |   | 2 | VNNIPSQSTRHSTVATEC[339]LSK                        | 1 |
|                                                                                                                                                                                                                                         |      |       |      |      |   |   | 2 | KGPSQC[330]PLC[330]K                              | 1 |
|                                                                                                                                                                                                                                         |      |       |      |      |   |   | 3 | IIC[339]AFQLDTGLEAYANSYNFAKKENNSPEHLK             | 1 |
|                                                                                                                                                                                                                                         |      |       |      |      |   |   | 3 | VEEVQNVINAMQKILEC[339]PIC[339]LELIK               | 1 |
| BRSK1_HUMAN (Q8TDC3) BR serine/threonine-protein kinase 1 (EC 2.7.11.1) (SAD1 kinase) (SAD1A) [MASS=86753]                                                                                                                              | *    | 10.71 | *    | *    | * | 3 | 3 | ASPTGTPGTTPPSPGGGVGGAAWRSRLNSIR                   | 1 |
|                                                                                                                                                                                                                                         |      |       |      |      |   |   | 3 | MQVPTAEEMSSLTPESSPELAKRSWFGNFISLDK                | 1 |
|                                                                                                                                                                                                                                         |      |       |      |      |   |   | 3 | RGVFHMPHFIPPDC[330]QSLLR                          | 1 |
| BRSK2_HUMAN (Q8IWQ3) BR serine/threonine-protein kinase 2 (EC 2.7.11.1) (Serine/threonine-protein kinase 29) (SAD1B) [MASS=81607]                                                                                                       | 0.00 | 4.21  | 1.03 | 0.00 | 1 | 1 | 2 | YDGRKADVWSC[339]GVILFALLVGALPFDDNLR               | 1 |
|                                                                                                                                                                                                                                         |      |       |      |      |   |   |   |                                                   |   |
| BRWD1_HUMAN (Q9NSI6) Bromodomain and WD repeat domain-containing protein 1 (WD repeat protein 9) [MASS=262918]                                                                                                                          | *    | 3.79  | *    | *    | * | 4 | 3 | HETSC[330]DQSESGSGSSEDEWRSRDK                     | 1 |
|                                                                                                                                                                                                                                         |      |       |      |      |   |   | 2 | VLSQALNGDSDSEDM[147]LNSEHK                        | 1 |
|                                                                                                                                                                                                                                         |      |       |      |      |   |   | 3 | PRPGVQMLC[330]SSFVSGGM[147]FLATGSTDHVIR           | 1 |
|                                                                                                                                                                                                                                         |      |       |      |      |   |   | 2 | RKSSSVTSSGEDSK                                    | 1 |
| BRWD2_HUMAN (Q9BZH6) Bromodomain and WD repeat domain-containing protein 2 (WD repeat protein 11) [MASS=136684]                                                                                                                         | 0.00 | 3.43  | 3.39 | 0.00 | 1 | 2 | 2 | VILASDDGC[339]IRVLEM[147]SMKSAC[339]FR            | 1 |
|                                                                                                                                                                                                                                         |      |       |      |      |   |   | 2 | GERGNDESAIEM[147]IKVSHLK                          | 1 |
| BSN_HUMAN (Q9UPA5) Bassoon protein (Zinc-finger protein 231) [MASS=416365]                                                                                                                                                              | *    | 2.98  | *    | *    | * | 5 | 3 | PAGGPLPPGGDTC[330]PQFC[330]SSHSM[147]PDVQEHVKDGPR | 1 |
|                                                                                                                                                                                                                                         |      |       |      |      |   |   | 2 | SPQVLYSPVSPSPHPR                                  | 1 |
|                                                                                                                                                                                                                                         |      |       |      |      |   |   | 2 | PHSQPSSAPAM[147]PKKGQPGYPSSAEYSQPSR               | 1 |
|                                                                                                                                                                                                                                         |      |       |      |      |   |   | 2 | IGQLFQGPGRDSAMDLSLKL                              | 1 |
|                                                                                                                                                                                                                                         |      |       |      |      |   |   | 3 | VC[330]NQC[330]GFNPNPHLTQVK                       | 1 |
| BSPRY_HUMAN (Q5W0U4) B box and SPRY domain-containing protein [MASS=44381]                                                                                                                                                              | 0.00 | 4.48  | 1.21 | 0.00 | 1 | 1 | 2 | VGVASGHLPRKGGSDC[339]R                            | 1 |
| C163A_HUMAN (Q86VB7) Scavenger receptor cysteine-rich type 1 protein M130 precursor (CD163 antigen) (Hemoglobin scavenger receptor) [Contains: Soluble CD163 (sCD163)] [MASS=125436]                                                    | *    | 1.30  | *    | *    | * | 1 | 3 | LTRGGNM[147]C[339]SGRIEIK                         | 1 |
| C1QBP_HUMAN (Q07021) Complement component 1 Q subcomponent-binding protein, mitochondrial precursor (Glycoprotein gC1qBP) (C1qBP) (GC1q-R protein) (Hyaluronan-binding protein 1) (Mitochondrial matrix protein p32) (p33) [MASS=31362] | 1.00 | 16.67 | 1.65 | 0.01 | 2 | 2 | 2 | M[147]LPLLRC[339]VPRVLGSSVAGLR                    | 1 |
|                                                                                                                                                                                                                                         |      |       |      |      |   |   | 2 | ALVLDC[339]HYPEDEVGQEDEAESDIFSIR                  | 1 |
|                                                                                                                                                                                                                                         |      |       |      |      |   |   | 3 | ALVLDC[339]HYPEDEVGQEDEAESDIFSIR                  | 1 |

|                                                                                                                                                                                                                                                                              |      |      |      |      |   |   |   |                                                |   |
|------------------------------------------------------------------------------------------------------------------------------------------------------------------------------------------------------------------------------------------------------------------------------|------|------|------|------|---|---|---|------------------------------------------------|---|
| C2TA_HUMAN (P33076) MHC class II transactivator (CIITA) [MASS=123456]                                                                                                                                                                                                        | 0.00 | 1.50 | 0.63 | 0.00 | 1 | 1 | 2 | C[330]LGALLGPSAAASVDRK                         | 1 |
| C560_HUMAN (Q99643) Succinate dehydrogenase cytochrome b560 subunit, mitochondrial precursor (Integral membrane protein CII-3) (QPs1) (QPs-1) (Succinate dehydrogenase complex subunit C) (Succinate-ubiquinone oxidoreductase cytochrome B large subunit) (CY [MASS=18610]) | 1.00 | 7.69 | 1.58 | 0.02 | 4 | 1 | 2 | SLC[330]LGPALIHTAK                             | 2 |
|                                                                                                                                                                                                                                                                              |      |      |      |      |   |   | 2 | SLC[339]LGPALIHTAK                             | 2 |
|                                                                                                                                                                                                                                                                              |      |      |      |      |   |   | 2 | ELAMKAESGPNETKNK                               | 1 |
|                                                                                                                                                                                                                                                                              |      |      |      |      |   |   | 3 | C[330]PSSLSNSRTHK                              | 8 |
| C8AP2_HUMAN (Q9UKL3) CASP8-associated protein 2 (FLICE-associated huge protein) [MASS=222656]                                                                                                                                                                                | *    | 1.41 | *    | *    | * | 2 |   |                                                |   |
| CAC2D_HUMAN (P54289) Dihydropyridine-sensitive L-type calcium channel subunits alpha 2/delta precursor [Contains: L-type calcium channel subunit alpha-2; L-type calcium channel subunit delta] [MASS=123183]                                                                | 0.97 | 9.90 | 0.79 | 0.30 | 3 | 5 | 3 | VEIRNKM[147]IDGESGEK                           | 1 |
|                                                                                                                                                                                                                                                                              |      |      |      |      |   |   | 2 | RNSDVM[147]DC[330]VILDDGGFLLM[147]ANHDDYTNQIGR | 1 |
|                                                                                                                                                                                                                                                                              |      |      |      |      |   |   | 3 | SFSGVLDG[330]GNC[339]SRIFHGEK                  | 1 |
|                                                                                                                                                                                                                                                                              |      |      |      |      |   |   | 3 | TSIRDPC[339]AGPVC[339]DC[339]KR                | 1 |
|                                                                                                                                                                                                                                                                              |      |      |      |      |   |   | 3 | FTLC[330]PNGYYFAIDPNGYVLLHPNLQPK               | 1 |
| CACP_HUMAN (P43155) Carnitine O-acetyltransferase (EC 2.3.1.7) (Carnitine acetylase) (CAT) (Carnitine acetyltransferase) (CrAT) [MASS=70925]                                                                                                                                 | 0.99 | 4.15 | 1.37 | 0.00 | 1 | 2 | 2 | IYGQAC[339]ATYESASLR                           | 1 |
|                                                                                                                                                                                                                                                                              |      |      |      |      |   |   | 2 | QDTVSNFSKTK                                    | 1 |
| CAD13_HUMAN (P55290) Cadherin-13 precursor (Truncated-cadherin) (T-cadherin) (T-cad) (Heart-cadherin) (H-cadherin) (P105) [MASS=78286]                                                                                                                                       | 0.00 | 6.87 | 0.54 | 0.00 | 1 | 2 | 2 | QEDLSVGSVLLTVNATDPDSLQHQQTIRYSVYK              | 1 |
|                                                                                                                                                                                                                                                                              |      |      |      |      |   |   | 2 | FSLPSVLLLSLFLSLAC[330]L                        | 1 |
| CAD23_HUMAN (Q9H251) Cadherin-23 precursor (Otocadherin) [MASS=369522]                                                                                                                                                                                                       | *    | 1.61 | *    | *    | * | 3 | 3 | GLNGLVITYTLDDLVPVPGYVQLEDSSAGK                 | 1 |
|                                                                                                                                                                                                                                                                              |      |      |      |      |   |   | 2 | ERIAEYQLRVVASDAGTPTK                           | 1 |
|                                                                                                                                                                                                                                                                              |      |      |      |      |   |   | 1 | STPLHK                                         | 1 |
| CALU_HUMAN (O43852) Calumenin precursor (Crocabin) (IEF SSP 9302) [MASS=37107]                                                                                                                                                                                               | 0.00 | 6.67 | 0.07 | 0.00 | 1 | 1 | 3 | QFLMC[330]LSLC[330]TAFALSKPTEKK                | 1 |
| CAN11_HUMAN (Q9UMQ6) Calpain-11 (EC 3.4.22.-) (Calcium-activated neutral proteinase 11) (CANP 11) [MASS=80582]                                                                                                                                                               | 0.00 | 3.13 | 3.81 | 0.00 | 1 | 1 | 3 | SSLM[147]GC[339]SIEVTSSELESM[147]TDK           | 1 |

|                                                                                                                                                                                                                                                                             |      |       |      |      |   |   |   |                                   |   |
|-----------------------------------------------------------------------------------------------------------------------------------------------------------------------------------------------------------------------------------------------------------------------------|------|-------|------|------|---|---|---|-----------------------------------|---|
| CAN3_HUMAN (P20807) Calpain-3 (EC 3.4.22.-) (Calpain L3) (Calpain p94) (Calcium-activated neutral proteinase 3) (CANP 3) (Muscle-specific calcium-activated neutral protease 3) (nCL-1) [MASS=94253]                                                                        | 0.00 | 7.92  | 0.82 | 0.00 | 1 | 4 | 3 | QIAGDDMEIC[330]ADELK              | 1 |
|                                                                                                                                                                                                                                                                             |      |       |      |      |   |   | 2 | HKDLKTHGFTLESC[330]R              | 1 |
|                                                                                                                                                                                                                                                                             |      |       |      |      |   |   | 2 | RPPEIC[330]ENPR                   | 1 |
|                                                                                                                                                                                                                                                                             |      |       |      |      |   |   | 2 | SMIALMDTDGSGKLNQLQEFHHLWNK        | 1 |
| CASPA_HUMAN (Q92851) Caspase-10 precursor (EC 3.4.22.-) (CASP-10) (ICE-like apoptotic protease 4) (Apoptotic protease Mch-4) (FAS-associated death domain protein interleukin-1B-converting enzyme 2) (FLICE2) [Contains: Caspase-10 subunit p23/17; Caspase-1 [MASS=58950] | 0.00 | 6.53  | 0.41 | 0.00 | 1 | 2 | 2 | HVEEGSWYIQSLC[330]NHLK            | 1 |
|                                                                                                                                                                                                                                                                             |      |       |      |      |   |   | 3 | QGKIDEDNLTC[339]LEDLC[339]K       | 1 |
| CATD_HUMAN (P07339) Cathepsin D precursor (EC 3.4.23.5) [Contains: Cathepsin D light chain; Cathepsin D heavy chain] [MASS=44552]                                                                                                                                           | 0.99 | 9.22  | 1.02 | 0.00 | 1 | 2 | 2 | TMSEVGGSVEDLIAKGPVSK              | 1 |
|                                                                                                                                                                                                                                                                             |      |       |      |      |   |   | 2 | AIGAVPLIQGEYM[147]IPC[339]EK      | 1 |
| CB013_HUMAN (Q8IW19) Protein C2orf13 [MASS=56955]                                                                                                                                                                                                                           | 0.00 | 6.65  | 5.14 | 0.00 | 1 | 2 | 2 | ILSIPSEVEMQC[339]TLR              | 1 |
|                                                                                                                                                                                                                                                                             |      |       |      |      |   |   | 3 | PNLWC[339]YLNPGDSFSLVDK           | 1 |
| CC026_HUMAN (Q9BQ75) Protein C3orf26 [MASS=31812]                                                                                                                                                                                                                           | 0.00 | 4.66  | 1.14 | 0.00 | 1 | 1 | 2 | SVLM[147]LIIC[339]SSAVR           | 1 |
| CC038_HUMAN (Q5JPI3) Uncharacterized protein C3orf38 [MASS=37541]                                                                                                                                                                                                           | 0.00 | 13.07 | 0.96 | 0.01 | 2 | 2 | 3 | NLLGLLDNDEIMALC[330]DTVTNRLVQPQDR | 1 |
|                                                                                                                                                                                                                                                                             |      |       |      |      |   |   | 2 | MEMSGLSFSEMEGC[339]R              | 1 |
| CCAR1_HUMAN (Q8IX12) Cell division cycle and apoptosis regulator protein 1 (Cell cycle and apoptosis regulatory protein 1) (CARP-1) (Death inducer with SAP domain) [MASS=132820]                                                                                           | *    | 1.65  | *    | *    | * | 2 | 2 | KLLNKVVLR                         | 1 |
|                                                                                                                                                                                                                                                                             |      |       |      |      |   |   | 2 | TILNLENSNK                        | 1 |
| CCD44_HUMAN (Q9BSH4) Coiled-coil domain-containing protein 44 [MASS=32477]                                                                                                                                                                                                  | 0.93 | 10.77 | 1.86 | 0.00 | 1 | 2 | 2 | AVNLERALEMAIEAGAEDVK              | 1 |
|                                                                                                                                                                                                                                                                             |      |       |      |      |   |   | 2 | FIC[339]DASSLHQVR                 | 1 |
| CCD45_HUMAN (Q96GE4) Coiled-coil domain-containing protein 45 [MASS=95296]                                                                                                                                                                                                  | *    | 4.14  | *    | *    | * | 1 | 3 | PNKAVPMKVSEHSLPLMLEQFPFLYVSGPTLSK | 1 |
| CCD82_HUMAN (Q8N4S0) Coiled-coil domain-containing protein 82 [MASS=64002]                                                                                                                                                                                                  | 0.00 | 3.68  | 0.60 | 0.00 | 1 | 1 | 2 | LSSVMC[330]DSDESDDSDILVRK         | 1 |
| CCND1_HUMAN (P24385) G1/S-specific cyclin-D1 (PRAD1 oncogene) (BCL-1 oncogene) [MASS=33729]                                                                                                                                                                                 | *    | 8.14  | *    | *    | * | 1 | 3 | FISNPPSM[147]VAAGSVVAAVQGLNLR     | 1 |

|                                                                                                                                                                                                                                                                              |      |       |      |      |   |   |   |                                          |   |
|------------------------------------------------------------------------------------------------------------------------------------------------------------------------------------------------------------------------------------------------------------------------------|------|-------|------|------|---|---|---|------------------------------------------|---|
| CCNH_HUMAN (P51946) Cyclin-H (MO15-associated protein) (p37) (p34) [MASS=37643]                                                                                                                                                                                              | *    | 13.31 | *    | *    | * | 3 | 2 | YEPPRSEEVAVLKQK                          | 1 |
|                                                                                                                                                                                                                                                                              |      |       |      |      |   |   | 3 | RFYLNNSVMEYHPR                           | 1 |
|                                                                                                                                                                                                                                                                              |      |       |      |      |   |   | 2 | TC[330]LSQLLDIM[147]KSM[147]R            | 1 |
| CCNL2_HUMAN (Q96S94) Cyclin-L2 (Paneth cell-enhanced expression protein) [MASS=58147]                                                                                                                                                                                        | *    | 3.08  | *    | *    | * | 1 | 2 | KKPVPLLLDQDYVNLK                         | 1 |
| CCRL2_HUMAN (O00421) C-C chemokine receptor-like 2 (Putative MCP-1 chemokine receptor) (Chemokine receptor CCR11) (Chemokine receptor X) [MASS=39513]                                                                                                                        | 0.00 | 6.40  | 0.16 | 0.00 | 1 | 1 | 2 | EHFSLSDC[330]KSSYNLDKSVHITK              | 1 |
| CD2L5_HUMAN (Q14004) Cell division cycle 2-like protein kinase 5 (EC 2.7.11.22) (CDC2-related protein kinase 5) (Cholinesterase-related cell division controller) [MASS=164922]                                                                                              | *    | 3.77  | *    | *    | * | 3 | 3 | AALLQLLAQHQPQDDPK                        | 1 |
|                                                                                                                                                                                                                                                                              |      |       |      |      |   |   | 2 | DHRFEYSHGPIAVLANSSDPSTGPETHPLPAK         | 1 |
|                                                                                                                                                                                                                                                                              |      |       |      |      |   |   | 1 | HRLSRSR                                  | 1 |
| CD59_HUMAN (P13987) CD59 glycoprotein precursor (Membrane attack complex inhibition factor) (MACIF) (MAC-inhibitory protein) (MAC-IP) (Protectin) (MEM43 antigen) (Membrane inhibitor of reactive lysis) (MIRL) (20 kDa homologous restriction factor) (HRF-20) [MASS=14177] | 1.00 | 18.75 | 0.60 | 0.26 | 5 | 2 | 3 | LRENELTYYC[330]C[330]K                   | 1 |
|                                                                                                                                                                                                                                                                              |      |       |      |      |   |   | 2 | FEHC[339]NFNDVTTR                        | 1 |
|                                                                                                                                                                                                                                                                              |      |       |      |      |   |   | 2 | LRENELTYYC[330]C[330]K                   | 2 |
|                                                                                                                                                                                                                                                                              |      |       |      |      |   |   | 2 | FEHC[330]NFNDVTTR                        | 2 |
| CD81_HUMAN (P60033) CD81 antigen (26 kDa cell surface protein TAPA-1) (Target of the antiproliferative antibody 1) (Tetraspanin-28) (Tspan-28) [MASS=25809]                                                                                                                  | 1.00 | 25.85 | 0.46 | 0.37 | 9 | 3 | 3 | TFHETLDC[339]C[339]GSSTLTALTTSVLK        | 1 |
|                                                                                                                                                                                                                                                                              |      |       |      |      |   |   | 2 | TFHETLDC[339]C[339]GSSTLTALTTSVLK        | 1 |
|                                                                                                                                                                                                                                                                              |      |       |      |      |   |   | 2 | TFHETLDC[330]C[330]GSSTLTALTTSVLK        | 1 |
|                                                                                                                                                                                                                                                                              |      |       |      |      |   |   | 2 | NNLC[330]PSGSNIISNLFK                    | 2 |
|                                                                                                                                                                                                                                                                              |      |       |      |      |   |   | 2 | NNLC[330]PSGSNIISNLFKEDC[330]HQK         | 1 |
|                                                                                                                                                                                                                                                                              |      |       |      |      |   |   | 2 | NNLC[339]PSGSNIISNLFK                    | 2 |
|                                                                                                                                                                                                                                                                              |      |       |      |      |   |   | 1 | NNLC[330]PSGSNIISNLFK                    | 1 |
|                                                                                                                                                                                                                                                                              |      |       |      |      |   |   | 1 | SC[330]PDAIK                             | 1 |
|                                                                                                                                                                                                                                                                              |      |       |      |      |   |   | 3 | AIHYALNC[339]C[339]GLAGGVEQFISDIC[339]PK | 2 |
| CD9_HUMAN (P21926) CD9 antigen (p24) (Leukocyte antigen MIC3) (Motility-related protein) (MRP-1) (Tetraspanin-29) (Tspan-29) [MASS=25285]                                                                                                                                    | 1.00 | 14.10 | 0.92 | 0.08 | 5 | 2 | 2 | AIHYALNC[330]C[330]GLAGGVEQFISDIC[330]PK | 1 |
|                                                                                                                                                                                                                                                                              |      |       |      |      |   |   | 2 | AIHYALNC[339]C[339]GLAGGVEQFISDIC[339]PK | 1 |
|                                                                                                                                                                                                                                                                              |      |       |      |      |   |   | 3 | AIHYALNC[330]C[330]GLAGGVEQFISDIC[330]PK | 1 |
|                                                                                                                                                                                                                                                                              |      |       |      |      |   |   | 1 | SC[339]PDAIK                             | 1 |
| CDAN1_HUMAN (Q8IWY9) Codanin-1 [MASS=133996]                                                                                                                                                                                                                                 | 0.00 | 5.06  | 0.50 | 0.00 | 1 | 3 | 2 | IRAMMGQLSAAC[330]SHSHFVR                 | 1 |
|                                                                                                                                                                                                                                                                              |      |       |      |      |   |   | 2 | LLC[330]FSPALQGRLRAAYEGSVAK              | 1 |
|                                                                                                                                                                                                                                                                              |      |       |      |      |   |   | 3 | SLSKPKTC[339]FTSPPIISC[330]VPSSK         | 1 |

|                                                                                                                                                            |      |      |      |      |   |   |   |                                       |   |
|------------------------------------------------------------------------------------------------------------------------------------------------------------|------|------|------|------|---|---|---|---------------------------------------|---|
| CDC42_HUMAN (P60953) Cell division control protein 42 homolog precursor (G25K GTP-binding protein) [MASS=21310]                                            | *    | 7.33 | *    | *    | * | 1 | 3 | QKPITPETAEKLAR                        | 1 |
| CE152_HUMAN (O94986) Centrosomal protein of 152 kDa (Cep152 protein) [MASS=147344]                                                                         | *    | 2.90 | *    | *    | * | 3 | 3 | WM[147]SVQYFEKLGKGC[339]IQK           | 1 |
|                                                                                                                                                            |      |      |      |      |   |   | 2 | TTQSGM[147]JSK                        | 1 |
|                                                                                                                                                            |      |      |      |      |   |   | 3 | EGAEEKIMNAASK                         | 1 |
| CENB2_HUMAN (Q15057) Centaurin-beta 2 (Cnt-b2) [MASS=88028]                                                                                                | *    | 2.57 | *    | *    | * | 1 | 3 | LM[147]C[330]ELGNDVINRVYEANVEK        | 1 |
|                                                                                                                                                            |      |      |      |      |   |   | 2 | IQHLQQDC[330]DVPSRELK                 | 1 |
|                                                                                                                                                            |      |      |      |      |   |   | 2 | QNHQVKPEK                             | 1 |
| CENPE_HUMAN (Q02224) Centromeric protein E (CENP-E protein) [MASS=312088]                                                                                  | *    | 3.57 | *    | *    | * | 6 | 2 | MDLSYSLESIEDPK                        | 1 |
|                                                                                                                                                            |      |      |      |      |   |   | 2 | VHESNKC[339]LEK                       | 1 |
|                                                                                                                                                            |      |      |      |      |   |   | 3 | IQELKANEHQLITLK                       | 1 |
|                                                                                                                                                            |      |      |      |      |   |   | 3 | IC[330]QVNNFFNNRIIAIMNESTEFEEERSATISK | 3 |
|                                                                                                                                                            |      |      |      |      |   |   | 2 | M[147]QKEVNDLLQENEQLMKVM[147]K        | 1 |
| CENPF_HUMAN (P49454) CENP-F kinetochore protein (Centromere protein F) (Mitosis) (AH antigen) [MASS=367592]                                                | *    | 3.36 | *    | *    | * | 7 | 2 | LQEDTSAHQNVVAETLSALENKEK              | 1 |
|                                                                                                                                                            |      |      |      |      |   |   | 3 | C[339]EETGNAYEDLSQK                   | 1 |
|                                                                                                                                                            |      |      |      |      |   |   | 3 | ATEQSLDPPIEEEHQLR                     | 1 |
|                                                                                                                                                            |      |      |      |      |   |   | 3 | EKSSTAM[147]EMLQTQLK                  | 1 |
|                                                                                                                                                            |      |      |      |      |   |   | 1 | RTTM[147]ATR                          | 1 |
|                                                                                                                                                            |      |      |      |      |   |   | 1 | LQLLSNEIMDK                           | 1 |
| CEP35_HUMAN (Q5VT06) Centrosome-associated protein 350 (Centrosome-associated protein of 350 kDa) [MASS=350928]                                            | *    | 1.25 | *    | *    | * | 2 | 3 | ERQSDQDM[147]NHSPNIQSGK               | 1 |
|                                                                                                                                                            |      |      |      |      |   |   | 3 | VATAPPAPAYKGFNPSETKIR                 | 1 |
| CEP41_HUMAN (Q9BYV8) Centrosomal protein of 41 kDa (Cep41 protein) (Testis-specific gene A14 protein) [MASS=41368]                                         | *    | 4.02 | *    | *    | * | 1 | 3 | SSPKGPPPLPAENKWR                      | 1 |
| CEZ2_HUMAN (Q8TE49) Zinc finger A20 domain-containing protein ? (EC 3.-.-) (Zinc finger protein Cezanne 2) (OTU domain-containing protein 7) [MASS=100676] | *    | 3.46 | *    | *    | * | 2 | 3 | EESGASASTSPSEK                        | 1 |
|                                                                                                                                                            |      |      |      |      |   |   | 2 | QVHTANLPHVFNEGRGPK                    | 1 |
| CF049_HUMAN (Q2TBC4) Protein C6orf49 [MASS=37551]                                                                                                          | *    | 4.65 | *    | *    | * | 1 | 3 | GLPGSSPQQENRPGDK                      | 1 |
| CF170_HUMAN (Q96NH3) Protein C6orf170 [MASS=143651]                                                                                                        | 0.00 | 3.13 | 7.03 | 0.00 | 1 | 2 | 3 | QHIGNTLGSM[147]IEEEM[147]EKC[339]TSDR | 1 |
|                                                                                                                                                            |      |      |      |      |   |   | 2 | QDNDLDKLLLC[339]LKISDK                | 1 |



|                                                                                                                                                                                                                                                                               |      |       |      |      |   |   |   |                                      |   |
|-------------------------------------------------------------------------------------------------------------------------------------------------------------------------------------------------------------------------------------------------------------------------------|------|-------|------|------|---|---|---|--------------------------------------|---|
| CFTR_HUMAN (P13569) Cystic fibrosis transmembrane conductance regulator (CFTR) (cAMP-dependent chloride channel) (ATP-binding cassette transporter sub-family C member 7) [MASS=168172]                                                                                       | *    | 6.22  | *    | *    | * | 4 | 3 | TPLQM[147]NGIEEDSDEPLER              | 1 |
|                                                                                                                                                                                                                                                                               |      |       |      |      |   |   | 2 | VGIIITLAMNIMSTLQWAVNSSIDVDSLNR       | 1 |
|                                                                                                                                                                                                                                                                               |      |       |      |      |   |   | 3 | EERSIAIYLGIGLC[339]LLFIVR            | 1 |
|                                                                                                                                                                                                                                                                               |      |       |      |      |   |   | 3 | M[147]LHSVVLQAPM[147]STLNTLKAGGILNR  | 1 |
| CG036_HUMAN (Q9NRH1) Protein C7orf36 [MASS=25299]                                                                                                                                                                                                                             | *    | 7.52  | *    | *    | * | 1 | 3 | DERLC[330]ENNAEFNKNC[339]SK          | 2 |
| CH006_HUMAN (Q8WWP5) Uncharacterized protein C8orf6 [MASS=10269]                                                                                                                                                                                                              | 0.00 | 28.72 | 0.49 | 0.00 | 1 | 1 | 3 | RTSPC[330]C[330]LFLPEHWGDGYTAAVAWPSR | 1 |
|                                                                                                                                                                                                                                                                               |      |       |      |      |   |   | 2 | C[330]IPALDSLTPANEDQK                | 1 |
|                                                                                                                                                                                                                                                                               |      |       |      |      |   |   | 2 | EIGNIISDAMK                          | 1 |
|                                                                                                                                                                                                                                                                               |      |       |      |      |   |   | 3 | C[339]EFQDAYVLLSEKK                  | 1 |
|                                                                                                                                                                                                                                                                               |      |       |      |      |   |   | 1 | C[339]EFQDAYVLLSEK                   | 1 |
| CH60_HUMAN (P10809) 60 kDa heat shock protein, mitochondrial precursor (Hsp60) (60 kDa chaperonin) (CPN60) (Heat shock protein 60) (HSP-60) (Mitochondrial matrix protein P1) (P60 lymphocyte protein) (HuCHA60) [MASS=61054]                                                 | 1.00 | 13.61 | 1.82 | 0.05 | 9 | 6 | 2 | AAVEEGIVLGGGC[339]ALLR               | 2 |
|                                                                                                                                                                                                                                                                               |      |       |      |      |   |   | 2 | C[330]EFQDAYVLLSEKK                  | 1 |
|                                                                                                                                                                                                                                                                               |      |       |      |      |   |   | 1 | GIIDPTK                              | 1 |
|                                                                                                                                                                                                                                                                               |      |       |      |      |   |   | 3 | C[330]EFQDAYVLLSEKK                  | 1 |
|                                                                                                                                                                                                                                                                               |      |       |      |      |   |   | 2 | C[339]IPALDSLTPANEDQK                | 1 |
|                                                                                                                                                                                                                                                                               |      |       |      |      |   |   | 2 | C[330]EFQDAYVLLSEK                   | 1 |
|                                                                                                                                                                                                                                                                               |      |       |      |      |   |   | 2 | ERIC[330]SEEER                       | 1 |
|                                                                                                                                                                                                                                                                               |      |       |      |      |   |   | 2 | ERIC[339]SEEERAK                     | 1 |
|                                                                                                                                                                                                                                                                               |      |       |      |      |   |   | 2 | YESHPVC[339]ADLQAK                   | 1 |
| CHCH3_HUMAN (Q9NX63) Coiled-coil-helix-coiled-coil-helix domain-containing protein 3 [MASS=26152]                                                                                                                                                                             | 1.00 | 30.84 | 1.50 | 0.07 | 8 | 6 | 2 | C[339]SALATQYM[147]HC[339]VNHAK      | 1 |
|                                                                                                                                                                                                                                                                               |      |       |      |      |   |   | 2 | YESHPVC[330]ADLQAK                   | 1 |
|                                                                                                                                                                                                                                                                               |      |       |      |      |   |   | 2 | IC[339]SEEER                         | 1 |
|                                                                                                                                                                                                                                                                               |      |       |      |      |   |   | 2 | RYESHPVC[330]ADLQAK                  | 1 |
|                                                                                                                                                                                                                                                                               |      |       |      |      |   |   | 2 | ERIC[339]SEEER                       | 1 |
|                                                                                                                                                                                                                                                                               |      |       |      |      |   |   | 3 | VEPVC[339]SGLQAQILHC[339]YR          | 1 |
| CHCH6_HUMAN (Q9BRQ6) Coiled-coil-helix-coiled-coil-helix domain-containing protein 6 [MASS=26458]                                                                                                                                                                             | 1.00 | 16.60 | 1.31 | 0.20 | 4 | 3 | 2 | C[339]VSAAHKG                        | 1 |
|                                                                                                                                                                                                                                                                               |      |       |      |      |   |   | 2 | VEPVC[339]SGLQAQILHC[339]YR          | 1 |
|                                                                                                                                                                                                                                                                               |      |       |      |      |   |   | 2 | DRPHEVLLC[339]SDLVK                  | 1 |
|                                                                                                                                                                                                                                                                               |      |       |      |      |   |   | 2 | SDGSGTYTK                            | 1 |
| CHD9_HUMAN (Q3L8U1) Chromodomain-helicase-DNA-binding protein 9 (EC 3.6.1.-) (ATP-dependent helicase CHD9) (CHD-9) (Chromatin-related mesenchymal modulator) (CReMM) (Chromatin remodeling factor CHROM1) (Peroxisomal proliferator-activated receptor A-inter) [MASS=326004] | *    | 0.90  | *    | *    | * | 2 | 3 | RMVAARTEPLTPNPASK                    | 1 |

|                                                                                                                                                                                                                                                                              |      |       |      |      |   |   |   |                                     |   |
|------------------------------------------------------------------------------------------------------------------------------------------------------------------------------------------------------------------------------------------------------------------------------|------|-------|------|------|---|---|---|-------------------------------------|---|
| CHST5_HUMAN (Q9GZS9) Carbohydrate sulfotransferase 5 (EC 2.8.2.-) (N-acetylglucosamine 6-O-sulfotransferase 3) (GlcNAc6ST-3) (Intestinal GlcNAc-6-sulfotransferase) (Intestinal N-acetylglucosamine-6-O-sulfotransferase) (I-GlcNAc6ST) (hIGn6ST) (Galactose/N [MASS=43832]) | 0.00 | 12.05 | 0.48 | 0.00 | 1 | 2 | 3 | DLMRSIFLC[330]DMDVFDAYMPQSR         | 1 |
|                                                                                                                                                                                                                                                                              |      |       |      |      |   |   | 2 | NLSAFFNWATSRALC[330]SPPAC[339]SAFPR | 1 |
| CI004_HUMAN (Q9P0K9) Protein C9orf4 (Brain protein CG-6) [MASS=37270]                                                                                                                                                                                                        | 0.00 | 2.33  | 0.62 | 0.00 | 1 | 1 | 2 | IKVDDC[330]GK                       | 1 |
|                                                                                                                                                                                                                                                                              |      |       |      |      |   |   | 3 | MGNLVIPLGKGRAGR                     | 5 |
| CI079_HUMAN (Q6ZUB1) Protein C9orf79 [MASS=157135]                                                                                                                                                                                                                           | *    | 1.04  | *    | *    | * | 1 |   |                                     |   |
| CIC_HUMAN (Q96RK0) Protein capicua homolog [MASS=163789]                                                                                                                                                                                                                     | 0.00 | 2.74  | 2.74 | 0.00 | 1 | 3 | 2 | YADIFPSKVC[339]LQLK                 | 1 |
|                                                                                                                                                                                                                                                                              |      |       |      |      |   |   | 3 | APGSSSC[339]GAERLHTVGGPGSAR         | 1 |
|                                                                                                                                                                                                                                                                              |      |       |      |      |   |   | 2 | FAELPEFR                            | 1 |
|                                                                                                                                                                                                                                                                              |      |       |      |      |   |   | 1 | LPC[339]VAAK                        | 2 |
| CISY_HUMAN (O75390) Citrate synthase, mitochondrial precursor (EC 2.3.3.1) [MASS=51712]                                                                                                                                                                                      | 1.00 | 4.51  | 1.56 | 0.07 | 4 | 3 | 2 | YTC[339]QR                          | 2 |
|                                                                                                                                                                                                                                                                              |      |       |      |      |   |   | 1 | GFSIPEC[339]QK                      | 1 |
| CJ031_HUMAN (Q8N7Q2) Putative uncharacterized protein C10orf31 precursor [MASS=19176]                                                                                                                                                                                        | 0.00 | 5.20  | 0.02 | 0.00 | 1 | 1 | 2 | FWVC[330]LAAC[330]R                 | 1 |

|                                                                                                                                                          |      |       |      |      |    |   |  |   |                                           |   |
|----------------------------------------------------------------------------------------------------------------------------------------------------------|------|-------|------|------|----|---|--|---|-------------------------------------------|---|
|                                                                                                                                                          |      |       |      |      |    |   |  | 2 | IVHAFDM[147]EDLGDKAVYC[330]R              | 1 |
|                                                                                                                                                          |      |       |      |      |    |   |  | 2 | AVYC[339]R                                | 1 |
|                                                                                                                                                          |      |       |      |      |    |   |  | 2 | IVHAFDMEDLGDKAVYC[339]R                   | 1 |
|                                                                                                                                                          |      |       |      |      |    |   |  | 2 | FPFC[339]DGAHTK                           | 2 |
|                                                                                                                                                          |      |       |      |      |    |   |  | 1 | KFPFC[339]DGAHTK                          | 1 |
|                                                                                                                                                          |      |       |      |      |    |   |  | 3 | IVHAFDMEDLGDKAVYC[330]R                   | 1 |
|                                                                                                                                                          |      |       |      |      |    |   |  | 3 | IVHAFDM[147]EDLGDKAVYC[339]R              | 1 |
|                                                                                                                                                          |      |       |      |      |    |   |  | 2 | IVHAFDM[147]EDLGDKAVYC[339]R              | 1 |
|                                                                                                                                                          |      |       |      |      |    |   |  | 2 | KFPFC[330]DGAHTK                          | 2 |
| CJ070_HUMAN (Q9NZ45) Protein C10orf70 [MASS=12199]                                                                                                       | 1.00 | 40.74 | 1.81 | 0.05 | 19 | 4 |  | 2 | KFPFC[339]DGAHTK                          | 4 |
|                                                                                                                                                          |      |       |      |      |    |   |  | 1 | FPFC[339]DGAHTK                           | 2 |
|                                                                                                                                                          |      |       |      |      |    |   |  | 1 | FPFC[330]DGAHTK                           | 1 |
|                                                                                                                                                          |      |       |      |      |    |   |  | 2 | FPFC[330]DGAHTK                           | 2 |
| CK5P2_HUMAN (Q96SN8) CDK5 regulatory subunit-associated protein 2 (CDK5 activator-binding protein C48) (Centrosome-associated protein 215) [MASS=215036] | *    | 2.32  | *    | *    | *  | 3 |  | 2 | EREIATEKK                                 | 1 |
|                                                                                                                                                          |      |       |      |      |    |   |  | 2 | HLTESTNQK                                 | 2 |
|                                                                                                                                                          |      |       |      |      |    |   |  | 3 | LKLLWRVSLPEDGQC[339]PLHC[339]EQIGEM[147]K | 1 |
| CKLF3_HUMAN (Q96MX0) CKLF-like MARVEL transmembrane domain-containing protein 3 (Chemokine-like factor superfamily member 3) [MASS=19713]                | 0.00 | 7.14  | 1.98 | 0.00 | 1  | 1 |  | 2 | WQGLC[339]WPMMDFLR                        | 1 |
| CLAT_HUMAN (P28329) Choline O-acetyltransferase (EC 2.3.1.6) (CHOACTase) (Choline acetylase) (ChAT) [MASS=82567]                                         | *    | 4.68  | *    | *    | *  | 2 |  | 3 | ELARAM[147]C[330]KELPEMFM[147]DETYLMSNR   | 1 |
|                                                                                                                                                          |      |       |      |      |    |   |  | 2 | RFQEGRVDNIR                               | 1 |
| CLD10_HUMAN (P78369) Claudin-10 (OSP-like protein) [MASS=24488]                                                                                          | 0.00 | 7.02  | 1.95 | 0.00 | 1  | 1 |  | 2 | DFPSM[147]LALDGYIQAC[330]R                | 1 |

|                                                                                                                                                                           |      |       |      |      |    |   |   |                                          |   |
|---------------------------------------------------------------------------------------------------------------------------------------------------------------------------|------|-------|------|------|----|---|---|------------------------------------------|---|
| CLH1_HUMAN (Q00610) Clathrin heavy chain 1 (CLH-17) [MASS=191482]                                                                                                         | 1.00 | 3.88  | 0.56 | 0.14 | 11 | 5 | 2 | YESLELC[330]RPVLQQGR                     | 1 |
|                                                                                                                                                                           |      |       |      |      |    |   | 2 | RDPHLAC[330]VAYER                        | 1 |
|                                                                                                                                                                           |      |       |      |      |    |   | 2 | IHEGC[330]EEPATHNALAK                    | 1 |
|                                                                                                                                                                           |      |       |      |      |    |   | 2 | RDPHLAC[339]VAYER                        | 1 |
|                                                                                                                                                                           |      |       |      |      |    |   | 2 | IHEGC[339]EEPATHNALAK                    | 1 |
|                                                                                                                                                                           |      |       |      |      |    |   | 2 | HSSLAGC[330]QIINYS                       | 1 |
|                                                                                                                                                                           |      |       |      |      |    |   | 3 | IHEGC[330]EEPATHNALAK                    | 2 |
| CLH2_HUMAN (P53675) Clathrin heavy chain 2 (CLH-22) [MASS=187029]                                                                                                         | 0.00 | 2.44  | *    | *    | *  | 2 | 2 | AHIAQLC[339]EK                           | 1 |
|                                                                                                                                                                           |      |       |      |      |    |   | 3 | RDPHLAC[330]VAYER                        | 1 |
|                                                                                                                                                                           |      |       |      |      |    |   | 2 | AHIAQLC[330]EK                           | 1 |
| CLK2_HUMAN (P49760) Dual specificity protein kinase CLK2 (EC 2.7.12.1) (CDC-like kinase 2) [MASS=60090]                                                                   | *    | 1.60  | *    | *    | *  | 1 | 2 | REDSYHVR                                 | 1 |
|                                                                                                                                                                           |      |       |      |      |    |   | 3 | EC[330]FAAC[330]LFTC[330]YDLLR           | 1 |
| CLK4_HUMAN (Q9HAZ1) Dual specificity protein kinase CLK4 (EC 2.7.12.1) (CDC-like kinase 4) [MASS=57492]                                                                   | *    | 8.52  | *    | *    | *  | 3 | 3 | EC[339]FAAC[330]LFTC[339]YDLLRPDMVLELAWR | 1 |
|                                                                                                                                                                           |      |       |      |      |    |   | 2 | ILGPIQHMIIQKTR                           | 1 |
|                                                                                                                                                                           |      |       |      |      |    |   | 2 | SIEDDEEGHLIC[330]QSGDVLRR                | 1 |
| CMC1_HUMAN (O75746) Calcium-binding mitochondrial carrier protein Aralar1 (Mitochondrial aspartate glutamate carrier 1) (Solute carrier family 25 member 12) [MASS=74755] | 1.00 | 15.49 | 1.66 | 0.01 | 4  | 5 | 1 | RSSPKR                                   | 1 |
|                                                                                                                                                                           |      |       |      |      |    |   | 2 | MQNQRGSGSVVGLM[147]YK                    | 1 |
|                                                                                                                                                                           |      |       |      |      |    |   | 2 | DIPFSAIYFPVYAHC[339]K                    | 1 |
|                                                                                                                                                                           |      |       |      |      |    |   | 3 | DGLISYQEFLAFESVLC[330]APDSMFIVAFQLFDK    | 1 |
|                                                                                                                                                                           |      |       |      |      |    |   | 2 | AGQTTYSGVIDC[330]FRK                     | 1 |
|                                                                                                                                                                           |      |       |      |      |    |   | 2 | GTAARVFRSSPQFGVTLAHYEVLQR                | 1 |
| CMC2_HUMAN                                                                                                                                                                | 0.00 | 3.85  | *    | *    | *  | 1 | 2 | AGQTTYSGVIDC[339]FRK                     | 1 |
|                                                                                                                                                                           |      |       |      |      |    |   | 2 | DIPFSAIYFPVYAHC[330]K                    | 1 |
| CN159_HUMAN (Q7Z3D6) Protein C14orf159, mitochondrial precursor [MASS=66436]                                                                                              | *    | 2.27  | *    | *    | *  | 1 | 2 | MTLADIERIAPLEEGTLPFNLAEAQR               | 1 |
|                                                                                                                                                                           |      |       |      |      |    |   | 2 | SRLPSAIRSLILQK                           | 1 |

|                                                                                                                                                                        |      |       |      |      |    |   |  |   |                                |   |
|------------------------------------------------------------------------------------------------------------------------------------------------------------------------|------|-------|------|------|----|---|--|---|--------------------------------|---|
|                                                                                                                                                                        |      |       |      |      |    |   |  | 2 | RPPGVLHC[339]TTK               | 2 |
|                                                                                                                                                                        |      |       |      |      |    |   |  | 3 | AHITLGC[339]AADVEAVQTGLDLLEILR | 3 |
|                                                                                                                                                                        |      |       |      |      |    |   |  | 1 | RPPGVLHC[330]TTK               | 1 |
|                                                                                                                                                                        |      |       |      |      |    |   |  | 3 | DKPELQFPFLQDEDTVATLLEC[330]K   | 2 |
|                                                                                                                                                                        |      |       |      |      |    |   |  | 2 | AHITLGC[330]AADVEAVQTGLDLLEILR | 1 |
|                                                                                                                                                                        |      |       |      |      |    |   |  | 3 | DKPELQFPFLQDEDTVATLLEC[339]K   | 2 |
| CN37_HUMAN (P09543) 2',3'-cyclic-nucleotide 3'-phosphodiesterase (EC 3.1.4.37) (CNP) (CNPase) [MASS=47578]                                                             | 1.00 | 24.94 | 1.03 | 0.03 | 22 | 7 |  | 2 | GEEVGELSRGKLYSLGNGR            | 1 |
|                                                                                                                                                                        |      |       |      |      |    |   |  | 2 | RLDEDLAAYC[330]R               | 1 |
|                                                                                                                                                                        |      |       |      |      |    |   |  | 2 | DKPELQFPFLQDEDTVATLLEC[339]K   | 1 |
|                                                                                                                                                                        |      |       |      |      |    |   |  | 1 | FC[330]DYGK                    | 2 |
|                                                                                                                                                                        |      |       |      |      |    |   |  | 2 | RLDEDLAAYC[339]R               | 1 |
|                                                                                                                                                                        |      |       |      |      |    |   |  | 2 | DKPELQFPFLQDEDTVATLLEC[330]K   | 2 |
|                                                                                                                                                                        |      |       |      |      |    |   |  | 2 | RPPGVLHC[330]TTK               | 2 |
|                                                                                                                                                                        |      |       |      |      |    |   |  | 1 | FC[339]DYGK                    | 1 |
|                                                                                                                                                                        |      |       |      |      |    |   |  | 3 | AHITLGC[330]AADVEAVQTGLDLLEILR | 1 |
|                                                                                                                                                                        |      |       |      |      |    |   |  | 1 | LDEDLAAYC[330]R                | 1 |
| CNGB1_HUMAN (Q14028) Cyclic nucleotide-gated cation channel 4 (CNG channel 4) (CNG-4) (CNG4) (Cyclic nucleotide-gated cation channel modulatory subunit) [MASS=102284] | *    | 2.09  | *    | *    | *  | 1 |  | 2 | LIDPDVTSDEESPKPSPAK            | 1 |
| CNN2_HUMAN (Q99439) Calponin-2 (Calponin H2, smooth muscle) (Neutral calponin) [MASS=33566]                                                                            | 0.00 | 4.22  | 3.05 | 0.00 | 1  | 1 |  | 3 | C[339]ASQSGM[147]TAYGTR        | 1 |
| CNTN1_HUMAN (Q12860) Contactin-1 precursor (Neural cell surface protein F3) (Glycoprotein gp135) [MASS=113320]                                                         | 0.54 | 0.79  | 0.44 | 0.00 | 1  | 1 |  | 2 | VIIIEC[339]KPK                 | 1 |
| CNTP1_HUMAN (P78357) Contactin-associated protein 1 precursor (Caspr) (Caspr1) (Neurexin 4) (Neurexin IV) (p190) [MASS=156266]                                         | 0.62 | 2.46  | 1.81 | 0.00 | 1  | 2 |  | 2 | C[339]SPNM[147]C[339]EHDGR     | 1 |
|                                                                                                                                                                        |      |       |      |      |    |   |  | 2 | LNLDTEFIGGLVGAARKNLAYR         | 1 |

|                                                                                                                                 |      |       |      |      |   |   |   |                                            |   |
|---------------------------------------------------------------------------------------------------------------------------------|------|-------|------|------|---|---|---|--------------------------------------------|---|
| CNTP2_HUMAN (Q9UHC6) Contactin-associated protein-like 2 precursor (Cell recognition molecule Caspr2) [MASS=148166]             | *    | 4.51  | *    | *    | * | 3 | 2 | LLNTPDGSPYTWWWGK                           | 1 |
|                                                                                                                                 |      |       |      |      |   |   | 1 | VGVHINITQTK                                | 1 |
|                                                                                                                                 |      |       |      |      |   |   | 3 | NYWNAASFNPSSYLHFSTFQGETSADISFYFK           | 1 |
| CO039_HUMAN (Q6ZRI6) Uncharacterized protein C15orf39 [MASS=110788]                                                             | *    | 3.06  | *    | *    | * | 1 | 2 | AEEAAGEESC[339]GASPTPATSASPPGPTLKARFR      | 1 |
| CO2A1_HUMAN (P02458) Collagen alpha-1(II) chain precursor [Contains: Chondrocalcin] [MASS=134491]                               | 0.00 | 8.67  | 0.88 | 0.00 | 1 | 5 | 2 | VFC[339]NM[147]ETGETC[339]VYPNPANVPK       | 1 |
|                                                                                                                                 |      |       |      |      |   |   | 3 | GLPGTPGTDGPKGASGPAGPPGAQPPGLQGMPGER        | 1 |
|                                                                                                                                 |      |       |      |      |   |   | 3 | ADQAAGGLRQHDAEVDATLKSLNNQIESIR             | 1 |
|                                                                                                                                 |      |       |      |      |   |   | 2 | GEPGGVGPPIPPGERGAPGNR                      | 1 |
|                                                                                                                                 |      |       |      |      |   |   | 3 | GPPGPQGPAGEQGPR                            | 1 |
| CO4A4_HUMAN (P53420) Collagen alpha-4(IV) chain precursor [MASS=164095]                                                         | 0.00 | 7.51  | 0.23 | 0.00 | 1 | 5 | 3 | GEKGNEGLC[339]AC[339]EPGPM[147]GPPGPPGLPGR | 1 |
|                                                                                                                                 |      |       |      |      |   |   | 2 | GDKGPTGVPGFPLDGIPGHPGPPGPR                 | 1 |
|                                                                                                                                 |      |       |      |      |   |   | 3 | GFGPGYLGGFLLVLHSQTDQEPTC[330]PLGMMPR       | 1 |
|                                                                                                                                 |      |       |      |      |   |   | 2 | IPGLPGAPGMRGPEGAMGLPGM[147]R               | 1 |
|                                                                                                                                 |      |       |      |      |   |   | 3 | GPEGAMGLPGMRGPPGPGC[339]K                  | 1 |
| CO6A1_HUMAN (P12109) Collagen alpha-1(VI) chain precursor [MASS=108547]                                                         | *    | 1.17  | *    | *    | * | 1 | 2 | LSIIATDHTYRR                               | 1 |
| COA2_HUMAN (O00763) Acetyl-CoA carboxylase 2 (EC 6.4.1.2) (ACC-beta) [Includes: Biotin carboxylase (EC 6.3.4.14)] [MASS=279692] | 0.00 | 6.00  | 0.43 | 0.00 | 1 | 8 | 3 | YILKVTRQSLTMFVLIM[147]NGC[330]HIEIDAHR     | 1 |
|                                                                                                                                 |      |       |      |      |   |   | 2 | GFSGGM[147]KDMYDQVLK                       | 1 |
|                                                                                                                                 |      |       |      |      |   |   | 2 | AQVVHLLSTM[147]DSPAST                      | 1 |
|                                                                                                                                 |      |       |      |      |   |   | 2 | TSLYSEDDC[339]KSLR                         | 1 |
|                                                                                                                                 |      |       |      |      |   |   | 2 | KPNIM[147]LGVVC[330]GALER                  | 1 |
|                                                                                                                                 |      |       |      |      |   |   | 2 | DPPLFSEARTSLYSEDDC[330]KSLR                | 1 |
|                                                                                                                                 |      |       |      |      |   |   | 3 | TDC[330]NHIFLNFVPTVIMDPNK                  | 1 |
|                                                                                                                                 |      |       |      |      |   |   | 2 | YAEEMVMKMIMTLNVQERGR                       | 1 |
| COAC_HUMAN (Q96CD2) Phosphopantothencysteine decarboxylase (EC 4.1.1.36) (PPC-DC) (CoaC) [MASS=22413]                           | 0.00 | 10.29 | 0.84 | 0.00 | 1 | 1 | 2 | KLVC[339]GDEGLGAM[147]AEVGTIVDK            | 1 |
| COF1_HUMAN (P23528) Cofilin-1 (Cofilin, non-muscle isoform) (18 kDa phosphoprotein) (p18) [MASS=18371]                          | 1.00 | 15.15 | 0.61 | 0.27 | 4 | 3 | 2 | AVLFC[330]LSEDKK                           | 1 |
|                                                                                                                                 |      |       |      |      |   |   | 1 | C[330]TLAEK                                | 1 |
|                                                                                                                                 |      |       |      |      |   |   | 2 | M[147]LPDKDC[330]R                         | 1 |
|                                                                                                                                 |      |       |      |      |   |   | 2 | MLPDKDC[330]R                              | 1 |
|                                                                                                                                 |      |       |      |      |   |   | 2 | M[147]LPDKDC[339]R                         | 1 |
| COG3_HUMAN (Q96JB2) Conserved oligomeric Golgi complex component 3 (Vesicle docking protein SEC34 homolog) (p94) [MASS=93964]   | 0.00 | 6.65  | *    | *    | * | 3 | 1 | ALHLMK                                     | 1 |
|                                                                                                                                 |      |       |      |      |   |   | 3 | SGSTESLNPRPQTTISPADLHGM[147]WYPTVRR        | 2 |
|                                                                                                                                 |      |       |      |      |   |   | 2 | PDTTAPLTDRQTDSVLELK                        | 1 |

|                                                                                                                                                                                                                                                                                 |      |       |      |      |   |   |   |                                                   |   |
|---------------------------------------------------------------------------------------------------------------------------------------------------------------------------------------------------------------------------------------------------------------------------------|------|-------|------|------|---|---|---|---------------------------------------------------|---|
| COPB_HUMAN (P53618) Coatomer subunit beta (Beta-coat protein) (Beta-COP) [MASS=107139]                                                                                                                                                                                          | 0.00 | 10.60 | 0.81 | 0.00 | 1 | 4 | 2 | NVTVQPDDPISFMQLTAK                                | 1 |
|                                                                                                                                                                                                                                                                                 |      |       |      |      |   |   | 3 | LVTEM[147]GTYATQSALSSSRPTK                        | 1 |
|                                                                                                                                                                                                                                                                                 |      |       |      |      |   |   | 3 | VTVNTNM[147]VDLNDYLQHILKSTNMKC[330]LTPEK          | 1 |
|                                                                                                                                                                                                                                                                                 |      |       |      |      |   |   | 3 | MTAAENVC[330]YTLINVPM[147]DSEPPSEISLKNLDLEK       | 1 |
| COQ3_HUMAN (Q9NZJ6)<br>Hexaprenyldihydroxybenzoate methyltransferase, mitochondrial precursor (EC 2.1.1.114) (Dihydroxyhexaprenylbenzoate methyltransferase) (3,4-dihydroxy-5-hexaprenylbenzoate methyltransferase) (DHHB methyltransferase) (DHHB-MT) (DHHB-MTas) [MASS=40998] | 0.00 | 8.94  | 1.98 | 0.00 | 1 | 1 | 3 | ILDVGC[339]GGGLLLEPLGRLGASVIGIDPVDENIK            | 1 |
| COX5B_HUMAN (P10606) Cytochrome c oxidase polypeptide Vb, mitochondrial precursor (EC 1.9.3.1) [MASS=13696]                                                                                                                                                                     | 1.00 | 4.65  | 2.27 | 0.00 | 3 | 1 | 2 | C[339]GAHYK                                       | 1 |
|                                                                                                                                                                                                                                                                                 |      |       |      |      |   |   | 1 | C[339]GAHYK                                       | 2 |
| COX7C_HUMAN (P15954) Cytochrome c oxidase polypeptide VIIc, mitochondrial precursor (EC 1.9.3.1) [MASS=7245]                                                                                                                                                                    | 1.00 | 26.98 | 1.72 | 0.00 | 2 | 1 | 2 | M[147]C[330]LYFGSAFATPFLVVR                       | 2 |
|                                                                                                                                                                                                                                                                                 |      |       |      |      |   |   | 2 | M[147]C[339]LYFGSAFATPFLVVR                       | 1 |
| CP045_HUMAN (Q96MC5) Uncharacterized protein C16orf45 [MASS=23732]                                                                                                                                                                                                              | 0.00 | 7.84  | 2.60 | 0.00 | 1 | 1 | 2 | FMMDDIQLC[339]KDIM[147]DLK                        | 1 |
| CP135_HUMAN (Q66GS9) Centrosomal protein of 135 kDa (Cep135 protein) (Centrosomal protein 4) [MASS=133503]                                                                                                                                                                      | *    | 3.86  | *    | *    | * | 3 | 2 | ENTM[147]LRAKVAQLQTDYDALK                         | 1 |
|                                                                                                                                                                                                                                                                                 |      |       |      |      |   |   | 2 | YELKSKVLIM[147]K                                  | 1 |
|                                                                                                                                                                                                                                                                                 |      |       |      |      |   |   | 2 | ESANFDFVLEPYK                                     | 1 |
| CP27B_HUMAN (O15528) 25-hydroxyvitamin D-1 alpha hydroxylase, mitochondrial precursor (EC 1.14.13.13) (Cytochrome P450 subfamily XXVIIIB polypeptide 1) (Cytochrome p450 27B1) (Calcidiol 1-monooxygenase) (25-OHD-1 alpha-hydroxylase) (25-hydroxyvitamin D(3) [MASS=56504]    | 0.00 | 2.95  | 0.43 | 0.00 | 1 | 1 | 2 | YAGTLNNVVC[330]DLVRR                              | 1 |
| CP2A7_HUMAN (P20853) Cytochrome P450 2A7 (EC 1.14.14.1) (CYP11A7) (P450-IIA4) [MASS=56408]                                                                                                                                                                                      | 0.00 | 16.40 | 0.61 | 0.00 | 1 | 3 | 2 | M[147]LASGLLLVALLAC[330]LTVMLM[147]SVWQQR         | 1 |
|                                                                                                                                                                                                                                                                                 |      |       |      |      |   |   | 3 | TKM[147]PYM[147]EAVIHEIQRFGDVIPM[147]SLAR         | 1 |
|                                                                                                                                                                                                                                                                                 |      |       |      |      |   |   | 2 | M[147]LASGLLLVALLAC[330]LTVML[147]VLM[147]SVWQQRK | 1 |
| CP2B6_HUMAN (P20813) Cytochrome P450 2B6 (EC 1.14.14.1) (CYP11B6) (P450 IIB1) [MASS=56278]                                                                                                                                                                                      | 0.00 | 7.33  | 0.24 | 0.00 | 1 | 3 | 3 | PVVMMLC[330]GVEAIR                                | 1 |
|                                                                                                                                                                                                                                                                                 |      |       |      |      |   |   | 1 | WKVLR                                             | 1 |
|                                                                                                                                                                                                                                                                                 |      |       |      |      |   |   | 2 | YGFLM[147]LKYPHVAERVYR                            | 1 |

|                                                                                                                                                                                                                                    |      |       |      |      |   |   |   |                                                 |   |
|------------------------------------------------------------------------------------------------------------------------------------------------------------------------------------------------------------------------------------|------|-------|------|------|---|---|---|-------------------------------------------------|---|
| CP8B1_HUMAN (Q9UNU6) Cytochrome P450 8B1 (EC 1.14.13.95) (CYPVIII B1) (7-alpha-hydroxycholest-4-en-3-one 12-alpha-hydroxylase) (Sterol 12-alpha-hydroxylase) (7-alpha-hydroxy-4-cholesten-3-one 12-alpha-hydroxylase) [MASS=58078] | 0.00 | 16.17 | 0.37 | 0.00 | 1 | 3 | 2 | GDGLKDLNETM[147]LDSLSFVMLTSK                    | 1 |
|                                                                                                                                                                                                                                    |      |       |      |      |   |   | 2 | FNFM[147]MLWASQGNTGPTSFWALLYLLKHPEAIR           | 1 |
|                                                                                                                                                                                                                                    |      |       |      |      |   |   | 3 | MVLWGPVLGALLVVIAGYLC[330]LPGM[147]LR            | 1 |
| CPLX2_HUMAN (Q6PUV4) Complexin-2 (Complexin II) (CPX II) (Synaphin-1) [MASS=15394]                                                                                                                                                 | 0.84 | 11.19 | 0.58 | 0.00 | 1 | 1 | 2 | AALEQPC[330]EGSLTRPK                            | 1 |
| CPNE5_HUMAN (Q9HCH3) Copine-5 (Copine V) [MASS=65733]                                                                                                                                                                              | 0.00 | 11.13 | 0.71 | 0.00 | 1 | 3 | 3 | M[147]EQPEDM[147]ASLSEFDSLGSIPATKVEITVSC[339]R  | 1 |
|                                                                                                                                                                                                                                    |      |       |      |      |   |   | 2 | MFPALGFGAKLPPDGR                                | 1 |
|                                                                                                                                                                                                                                    |      |       |      |      |   |   | 2 | LARDVLAIEIPDQLVSYMK                             | 1 |
| CQ10B_HUMAN (Q9H8M1) Protein COQ10 B, mitochondrial precursor [MASS=27070]                                                                                                                                                         | 0.00 | 18.07 | 0.88 | 0.00 | 1 | 3 | 2 | LYGPETNIPR                                      | 1 |
|                                                                                                                                                                                                                                    |      |       |      |      |   |   | 2 | SDVISKRSGYC[330]K                               | 1 |
|                                                                                                                                                                                                                                    |      |       |      |      |   |   | 2 | RILGYSMQEM[147]YDVVSGVEDYK                      | 1 |
| CR2_HUMAN (P20023) Complement receptor type 2 precursor (Cr2) (Complement C3d receptor) (Epstein-Barr virus receptor) (EBV receptor) (CD21 antigen) [MASS=112973]                                                                  | *    | 3.58  | *    | *    | * | 2 | 2 | NYTDTSQK                                        | 1 |
|                                                                                                                                                                                                                                    |      |       |      |      |   |   | 2 | LNKTHSAYSHNDIVYVDC[339]NPGFIM[147]NGSR          | 1 |
| CRTC_HUMAN (P27797) Calreticulin precursor (CRP55) (Calregulin) (HACBP) (ERp60) (grp60) [MASS=48141]                                                                                                                               | 1.00 | 10.31 | 1.07 | 0.06 | 2 | 3 | 2 | C[330]KDDEFTHLYTLIVRPDNTYEVK                    | 1 |
|                                                                                                                                                                                                                                    |      |       |      |      |   |   | 2 | HEQNIDC[339]GGGYVK                              | 1 |
|                                                                                                                                                                                                                                    |      |       |      |      |   |   | 2 | WIESKHK                                         | 1 |
| CRYM_HUMAN (Q14894) Mu-crystallin homolog (NADP-regulated thyroid-hormone-binding protein) [MASS=33775]                                                                                                                            | 0.92 | 2.87  | 0.89 | 0.11 | 2 | 1 | 2 | GVKPAHC[330]EK                                  | 2 |
| CS015_HUMAN (Q6ZRH7) Uncharacterized protein C19orf15 precursor [MASS=133043]                                                                                                                                                      | 0.00 | 3.11  | 0.85 | 0.38 | 2 | 2 | 3 | LC[339]PVYFHSNGSEYIMALTTGK                      | 1 |
|                                                                                                                                                                                                                                    |      |       |      |      |   |   | 2 | MC[330]GPAMFPAGPPWPR                            | 1 |
| CSMD3_HUMAN (Q7Z407) CUB and sushi domain-containing protein 3 precursor (CUB and sushi multiple domains protein 3) [MASS=401695]                                                                                                  | *    | 4.85  | *    | *    | * | 7 | 3 | GFNITYNTFGHNEC[339]PDPGIPINAR                   | 1 |
|                                                                                                                                                                                                                                    |      |       |      |      |   |   | 2 | TPRC[339]VVVTC[339]PSINSFILEHGRWR               | 1 |
|                                                                                                                                                                                                                                    |      |       |      |      |   |   | 3 | IYDGKDKTTHLLGAFTGASM[147]R                      | 1 |
|                                                                                                                                                                                                                                    |      |       |      |      |   |   | 3 | YGDDYVVGQNVSYM C[330]QPGYTM[147]ELNGSR          | 1 |
|                                                                                                                                                                                                                                    |      |       |      |      |   |   | 3 | QC[339]TANGTWSGTL PNC[330]TIISC[339]GDPGIPANGLR | 1 |
|                                                                                                                                                                                                                                    |      |       |      |      |   |   | 3 | IESSNTMHLAFRSDGSVSYTG FHLEYKAK                  | 1 |
|                                                                                                                                                                                                                                    |      |       |      |      |   |   | 3 | LRESC[330]FDPGNIM[147]NGTRLGM[147]DYK           | 1 |
| CSN5_HUMAN (Q92905) COP9 signalosome complex subunit 5 (EC 3.4.-.-) (Signalosome subunit 5) (SGN5) (Jun activation domain-binding protein 1) [MASS=37447]                                                                          | *    | 8.11  | *    | *    | * | 2 | 3 | ISALALLKM[147]VM[147]HAR                        | 1 |
|                                                                                                                                                                                                                                    |      |       |      |      |   |   | 2 | GSFM[147]LGLETHDRK                              | 1 |



|                                                                                                                                                                                                        |                                  |       |      |      |   |    |   |                                             |   |
|--------------------------------------------------------------------------------------------------------------------------------------------------------------------------------------------------------|----------------------------------|-------|------|------|---|----|---|---------------------------------------------|---|
| CSN7A_HUMAN (Q9UBW8) COP9 signalosome complex subunit 7a (Signalosome subunit 7a) (SGN7a) (JAB1-containing signalosome subunit 7a) (Dermal papilla-derived protein 10) [MASS=30276]                    | 0.00                             | 13.09 | 0.45 | 0.00 | 1 | 2  | 3 | VTTAAAAAATSQDPEQHLTEL                       | 1 |
|                                                                                                                                                                                                        |                                  |       |      |      |   |    | 2 | C[330]IPYAVLLEALALR                         | 1 |
|                                                                                                                                                                                                        |                                  |       |      |      |   |    | 2 | FTFEEAAKEC[330]ENQDAR                       | 2 |
| CSPG2_HUMAN (P13611) Versican core protein precursor (Large fibroblast proteoglycan) (Chondroitin sulfate proteoglycan core protein 2) (PG-M) (Glial hyaluronate-binding protein) (GHAP) [MASS=372817] | 1.00                             | 5.57  | 0.40 | 0.37 | 6 | 10 | 2 | PSDLYEPPSGEGSGEVDIVDSFHTSATTQATR            | 1 |
|                                                                                                                                                                                                        |                                  |       |      |      |   |    | 2 | KGTVAC[330]GQPPVVENAK                       | 1 |
|                                                                                                                                                                                                        |                                  |       |      |      |   |    | 1 | VGC[330]YGDK                                | 1 |
|                                                                                                                                                                                                        |                                  |       |      |      |   |    | 3 | VGHDYQWIGLNDKM[147]FEHDFR                   | 1 |
|                                                                                                                                                                                                        |                                  |       |      |      |   |    | 3 | VSGTVSTNFPQTIEPAKLWSRQEVNPVR                | 1 |
|                                                                                                                                                                                                        |                                  |       |      |      |   |    | 2 | FDAYC[330]FKPK                              | 1 |
|                                                                                                                                                                                                        |                                  |       |      |      |   |    | 3 | EC[330]RLQGAHLTSILSHEEQMFVNR                | 1 |
| 2                                                                                                                                                                                                      | SPQETYDVYC[330]YVDHLDGDVFHLTVPSK | 1     |      |      |   |    |   |                                             |   |
| 2                                                                                                                                                                                                      | ERTETLIPEM[147]R                 | 1     |      |      |   |    |   |                                             |   |
| CSPG3_HUMAN (O14594) Neurocan core protein precursor (Chondroitin sulfate proteoglycan 3) [MASS=142972]                                                                                                | 0.53                             | 1.67  | 0.46 | 0.00 | 1 | 2  | 2 | C[330]GGPAPGVR                              | 1 |
|                                                                                                                                                                                                        |                                  |       |      |      |   |    | 3 | C[330]GGPAPGVRTVYR                          | 1 |
| CSPG5_HUMAN (O95196) Chondroitin sulfate proteoglycan 5 precursor (Neuroglycan C) (Acidic leucine-rich EGF-like domain-containing brain protein) [MASS=60058]                                          | 0.00                             | 3.36  | 0.60 | 0.00 | 1 | 1  | 2 | ALAHYDNNVIC[330]QDDPSAPHK                   | 1 |
| CT032_HUMAN (Q9NQ75) HEF-like protein [MASS=87144]                                                                                                                                                     | *                                | 1.53  | *    | *    | * | 1  | 2 | QQLYDIPASPKK                                | 1 |
| CT165_HUMAN (Q9BR10) Uncharacterized protein C20orf165 [MASS=23834]                                                                                                                                    | 0.00                             | 14.54 | 0.40 | 0.00 | 1 | 1  | 2 | AEQVAPAAQAWGPALAM[147]PQARGC[330]PGGTSWETLR | 1 |
| CT2NL_HUMAN (Q9P2B4) CTTNBP2 N-terminal-like protein [MASS=70158]                                                                                                                                      | *                                | 4.07  | *    | *    | * | 2  | 2 | NLANTANPRGDTSHSPTPGK                        | 1 |
|                                                                                                                                                                                                        |                                  |       |      |      |   |    | 1 | PVTVSK                                      | 1 |
| CTGF_HUMAN (P29279) Connective tissue growth factor precursor (Hypertrophic chondrocyte-specific protein 24) [MASS=38069]                                                                              | 0.00                             | 6.88  | 3.66 | 0.00 | 1 | 1  | 2 | VAFVLLALC[330]SRPAVGQNC[330]SGPC[330]R      | 1 |
| CTL2_HUMAN (Q8IWA5) Choline transporter-like protein 2 (Solute carrier family 44 member 2) [MASS=80151]                                                                                                | 1.00                             | 5.38  | 1.07 | 0.22 | 2 | 3  | 2 | C[330]QFAFYGGESGYHR                         | 1 |
|                                                                                                                                                                                                        |                                  |       |      |      |   |    | 2 | DGDC[330]PAVLIPSKPLARR                      | 1 |
|                                                                                                                                                                                                        |                                  |       |      |      |   |    | 3 | C[330]LMTC[339]LK                           | 1 |
| CTNB1_HUMAN (P35222) Beta-catenin [MASS=85496]                                                                                                                                                         | *                                | 2.30  | *    | *    | * | 1  | 2 | M[147]ATQADLM[147]ELDMAMEPDR                | 1 |
|                                                                                                                                                                                                        |                                  |       |      |      |   |    | 3 | MATQADLM[147]ELDM[147]AM[147]EPDR           | 1 |
|                                                                                                                                                                                                        |                                  |       |      |      |   |    | 2 | MATQADLMELDMAM[147]EPDR                     | 1 |

|                                                                                                                                                                                             |      |       |      |      |    |   |   |                                                        |   |
|---------------------------------------------------------------------------------------------------------------------------------------------------------------------------------------------|------|-------|------|------|----|---|---|--------------------------------------------------------|---|
| CTRB1_HUMAN (P17538) Chymotrypsinogen B precursor (EC 3.4.21.1) [Contains: Chymotrypsin B chain A; Chymotrypsin B chain B; Chymotrypsin B chain C] [MASS=27870]                             | *    | 11.03 | *    | *    | *  | 1 | 3 | RITDVM[147]IC[339]AGASGVSSC[339]M[147]GDSGGPLVC[339]QK | 1 |
| CTRO_HUMAN (O14578) Citron Rho-interacting kinase (EC 2.7.11.1) (CRIK) (Rho-interacting, serine/threonine-protein kinase 21) [MASS=231430]                                                  | 0.00 | 4.05  | 7.85 | 0.00 | 1  | 4 | 3 | EGILDALFVLFEEC[330]SQPALMKIK                           | 1 |
|                                                                                                                                                                                             |      |       |      |      |    |   | 2 | AESLSDKLNDLEK                                          | 1 |
|                                                                                                                                                                                             |      |       |      |      |    |   | 3 | TTC[339]TM[147]LEEQVMDLEALNDELLEK                      | 1 |
|                                                                                                                                                                                             |      |       |      |      |    |   | 2 | IVELSEANKLAANSSLFTQRNMK                                | 1 |
| CU005_HUMAN (Q9Y3R5) Protein C21orf5 [MASS=258222]                                                                                                                                          | 0.00 | 2.44  | 0.64 | 0.00 | 1  | 3 | 2 | ILEPVLLLLLQPKTQRTSIHC[330]LK                           | 1 |
|                                                                                                                                                                                             |      |       |      |      |    |   | 2 | NVEFIHSLLRQC[330]K                                     | 1 |
|                                                                                                                                                                                             |      |       |      |      |    |   | 3 | DAPGREQKYMLGTHQLTVK                                    | 1 |
| CU063_HUMAN (P58658) Protein C21orf63 precursor (SUE21) [MASS=49483]                                                                                                                        | *    | 5.67  | *    | *    | *  | 1 | 2 | EQIIQEIWMNSGLDTSLPRNMGQFY                              | 1 |
| CUBN_HUMAN (O60494) Cubilin precursor (Intrinsic factor-cobalamin receptor) (Intrinsic factor-vitamin B12 receptor) (460 kDa receptor) (Intestinal intrinsic factor receptor) [MASS=398724] | 0.00 | 3.26  | 1.26 | 0.00 | 1  | 5 | 3 | LATHPSC[339]NNEHVIVFNGIR                               | 1 |
|                                                                                                                                                                                             |      |       |      |      |    |   | 3 | C[339]GGNYTDPEGELFLPELSGPFTHTR                         | 1 |
|                                                                                                                                                                                             |      |       |      |      |    |   | 2 | FQFC[330]GRNASAVPVFYSSMSTAMVIFK                        | 1 |
|                                                                                                                                                                                             |      |       |      |      |    |   | 3 | REKGFQMWFVYGC[330]GGELSGATGSFSSPGFPNR                  | 1 |
|                                                                                                                                                                                             |      |       |      |      |    |   | 2 | NSRM[147]SFTYQIADC[330]NR                              | 1 |
| CUZD1_HUMAN (Q86UP6) CUB and zona pellucida-like domain-containing protein 1 precursor (Transmembrane protein UO-44) [MASS=68153]                                                           | 0.00 | 6.59  | 3.57 | 0.08 | 2  | 2 | 2 | DETC[339]KVYPLFGHYGRFQFNAFK                            | 1 |
|                                                                                                                                                                                             |      |       |      |      |    |   | 3 | VFDGTSSNGPLLQVVC[339]SK                                | 2 |
| CV106_HUMAN (Q6P0N0) Protein C14orf106 (P243) [MASS=129085]                                                                                                                                 | *    | 3.53  | *    | *    | *  | 2 | 2 | YMAINQKKAYILVTPLK                                      | 3 |
|                                                                                                                                                                                             |      |       |      |      |    |   | 2 | SNKHSESPGATELNM[147]C[339]HSNC[339]QNK                 | 1 |
| CX038_HUMAN (Q8TB03) Protein CXorf38 [MASS=36670]                                                                                                                                           | *    | 3.76  | *    | *    | *  | 1 | 3 | C[339]RNEIM[147]HSSEMK                                 | 1 |
|                                                                                                                                                                                             |      |       |      |      |    |   | 2 | M[147]AAAAASLRGVVLGPR                                  | 1 |
|                                                                                                                                                                                             |      |       |      |      |    |   | 3 | HLVGVC[339]YTEDEAK                                     | 1 |
|                                                                                                                                                                                             |      |       |      |      |    |   | 1 | DVC[330]TFLR                                           | 2 |
|                                                                                                                                                                                             |      |       |      |      |    |   | 2 | HGGEDYVFSLLTGYC[339]EPPTGVSLR                          | 3 |
| CY1_HUMAN (P08574) Cytochrome c1, heme protein, mitochondrial precursor (Cytochrome c-1) [MASS=35390]                                                                                       | 1.00 | 18.46 | 1.69 | 0.03 | 11 | 4 | 2 | HGGEDYVFSLLTGYC[339]EPPTGVSLR                          | 3 |
|                                                                                                                                                                                             |      |       |      |      |    |   | 1 | HLVGVC[339]YTEDEAK                                     | 1 |
|                                                                                                                                                                                             |      |       |      |      |    |   | 3 | HGGEDYVFSLLTGYC[339]EPPTGVSLR                          | 2 |
|                                                                                                                                                                                             |      |       |      |      |    |   | 2 | HLVGVC[339]YTEDEAK                                     | 1 |
|                                                                                                                                                                                             |      |       |      |      |    |   | 2 | HGGEDYVFSLLTGYC[330]EPPTGVSLR                          | 1 |

|                                                                                                                                                                                                       |      |       |      |      |   |   |   |                               |   |
|-------------------------------------------------------------------------------------------------------------------------------------------------------------------------------------------------------|------|-------|------|------|---|---|---|-------------------------------|---|
| CYTC_HUMAN (P01034) Cystatin C precursor (Neuroendocrine basic polypeptide) (Gamma-trace) (Post-gamma-globulin) [MASS=15799]                                                                          | 0.00 | 11.64 | 0.15 | 0.00 | 1 | 1 | 3 | TQPNLDNC[330]PFHDQPHLK        | 2 |
| CYTN_HUMAN (P01037) Cystatin SN precursor (Salivary cystatin SA-1) (Cystatin SA-I) [MASS=16362]                                                                                                       | *    | 17.02 | *    | *    | * | 1 | 2 | MAQHLSTLLLLLATALAVALAWSPK     | 1 |
| DB109_HUMAN (Q30KR1) Beta-defensin 109 precursor (Defensin, beta 109) [MASS=9886]                                                                                                                     | 0.00 | 20.69 | 9.00 | 0.00 | 1 | 1 | 3 | GGLGPAEGHC[339]LNLFQVC[339]JR | 1 |
| DC1L2_HUMAN (O43237) Cytoplasmic dynein 1 light intermediate chain 2 (Dynein light intermediate chain 2, cytosolic) (LIC53/55) (LIC-2) [MASS=54099]                                                   | 0.00 | 5.69  | 0.42 | 0.00 | 1 | 2 | 2 | M[147]KIPPEKMR                | 2 |
|                                                                                                                                                                                                       |      |       |      |      |   |   | 2 | DFQDYM[147]EPEEGC[330]QGSPQRR | 1 |
| DCMC_HUMAN (O95822) Malonyl-CoA decarboxylase, mitochondrial precursor (EC 4.1.1.9) (MCD) [MASS=55003]                                                                                                | 0.00 | 7.30  | 3.30 | 0.00 | 1 | 2 | 2 | EAAVLLQAEDR                   | 1 |
|                                                                                                                                                                                                       |      |       |      |      |   |   | 3 | TPAPAEGQC[339]ADFVSYGGLAETAQR | 1 |
| DCXR_HUMAN (Q7Z4W1) L-xylulose reductase (EC 1.1.1.10) (XR) (Dicarbonyl/L-xylulose reductase) (Kidney dicarbonyl reductase) (kiDCR) (Carbonyl reductase II) (Sperm surface protein P34H) [MASS=25913] | 0.97 | 4.92  | 1.74 | 0.00 | 1 | 1 | 2 | AVTNHSVYC[339]STK             | 1 |
| DCX_HUMAN (O43602) Neuronal migration protein doublecortin (Lissencephalin-X) (Lis-X) (Doublin) [MASS=44925]                                                                                          | 0.00 | 19.15 | 1.20 | 0.00 | 1 | 4 | 3 | APQSLASSNSAQARENKDFVR         | 1 |
|                                                                                                                                                                                                       |      |       |      |      |   |   | 2 | SKSPADSANGTSSSQLSTPK          | 1 |
|                                                                                                                                                                                                       |      |       |      |      |   |   | 3 | APQSLASSNSAQAR                | 1 |
|                                                                                                                                                                                                       |      |       |      |      |   |   | 2 | IGSMDELEEGESYVC[339]SSDNFFK   | 1 |
|                                                                                                                                                                                                       |      |       |      |      |   |   | 3 | ILPQDVILKFR                   | 2 |
| DDX27_HUMAN (Q96GQ7) Probable ATP-dependent RNA helicase DDX27 (EC 3.6.1.-) (DEAD box protein 27) [MASS=89835]                                                                                        | *    | 6.16  | *    | *    | * | 4 | 2 | AMPEEEPVR                     | 1 |
|                                                                                                                                                                                                       |      |       |      |      |   |   | 1 | SQEAALR                       | 1 |
|                                                                                                                                                                                                       |      |       |      |      |   |   | 2 | QTM[147]LFSATMTDEVKDLASVSLK   | 1 |
|                                                                                                                                                                                                       |      |       |      |      |   |   |   |                               |   |
| DDX58_HUMAN (O95786) Probable ATP-dependent RNA helicase DDX58 (EC 3.6.1.-) (DEAD-box protein 58) (Retinoic acid-inducible gene 1 protein) (RIG-1) (RIG-I) [MASS=106599]                              | 0.00 | 2.38  | 0.54 | 0.00 | 1 | 2 | 2 | WKDFHFKEK                     | 1 |
|                                                                                                                                                                                                       |      |       |      |      |   |   | 2 | LC[330]ASLDASVIATVK           | 1 |
| DECR_HUMAN (Q16698) 2,4-dienoyl-CoA reductase, mitochondrial precursor (EC 1.3.1.34) (2,4-dienoyl-CoA reductase [NADPH]) (4-enoyl-CoA reductase [NADPH]) [MASS=36067]                                 | 0.59 | 5.37  | 1.15 | 0.00 | 1 | 1 | 2 | GM[147]TLLSSLGAQC[339]VIASR   | 1 |

|                                                                                                                                                |      |       |      |      |    |   |   |                                               |   |
|------------------------------------------------------------------------------------------------------------------------------------------------|------|-------|------|------|----|---|---|-----------------------------------------------|---|
| DEST_HUMAN (P60981) Dextrin (Actin-depolymerizing factor) (ADF) [MASS=18374]                                                                   | *    | 10.98 | *    | *    | *  | 1 | 3 | ASGVQVADEVLC[330]RIFYDMK                      | 1 |
| DGAT1_HUMAN (O75907) Diacylglycerol O-acyltransferase 1 (EC 2.3.1.20) (Diglyceride acyltransferase) (ACAT-related gene product 1) [MASS=55278] | *    | 5.74  | *    | *    | *  | 1 | 3 | GSSKWM[147]ARTGVFLASAFFHEYLVSVPLR             | 2 |
| DGKQ_HUMAN (P52824) Diacylglycerol kinase theta (EC 2.7.1.107) (Diglyceride kinase theta) (DGK-theta) (DAG kinase theta) [MASS=101403]         | 0.00 | 8.92  | 1.17 | 0.00 | 1  | 5 | 2 | EGNLP SGARC[339]EVC[339]RK                    | 1 |
|                                                                                                                                                |      |       |      |      |    |   | 2 | QVSQTRFYVAESR                                 | 1 |
|                                                                                                                                                |      |       |      |      |    |   | 2 | C[330]EWC[330]GVQAHSLC[330]SAALAP EC[330]GFGR | 1 |
|                                                                                                                                                |      |       |      |      |    |   | 2 | QAESPESFQLVEVAM[147]GC[339]R                  | 1 |
|                                                                                                                                                |      |       |      |      |    |   | 2 | ETQATPESGKQTLK                                | 1 |
|                                                                                                                                                |      |       |      |      |    |   | 3 | ALASLMTYKC[339]AVVDVPPFGGAKAGVK               | 1 |
|                                                                                                                                                |      |       |      |      |    |   | 3 | AKPYEGSILEADC[339]DILIPAASEK                  | 2 |
|                                                                                                                                                |      |       |      |      |    |   | 2 | AKPYEGSILEADC[339]DILIPAASEK                  | 2 |
|                                                                                                                                                |      |       |      |      |    |   | 3 | TAAYVNAIEKVFK                                 | 1 |
|                                                                                                                                                |      |       |      |      |    |   | 3 | AKPYEGSILEADC[330]DILIPAASEK                  | 1 |
|                                                                                                                                                |      |       |      |      |    |   | 2 | IIKPC[339]NHVLSLSFPIR                         | 2 |
| DHE3_HUMAN (P00367) Glutamate dehydrogenase 1, mitochondrial precursor (EC 1.4.1.3) (GDH) [MASS=61397]                                         | 1.00 | 26.16 | 1.67 | 0.03 | 16 | 7 | 3 | HYSEAVADREDDPNFFKMVEGFFDR                     | 1 |
|                                                                                                                                                |      |       |      |      |    |   | 2 | C[339]AVVDVPPFGGAK                            | 2 |
|                                                                                                                                                |      |       |      |      |    |   | 3 | YSTDVSVDEVKALASLM[147]TYKC[330]AVVDVPPFGGAK   | 1 |
|                                                                                                                                                |      |       |      |      |    |   | 1 | C[339]AVVDVPPFGGAK                            | 2 |
|                                                                                                                                                |      |       |      |      |    |   | 2 | C[330]AVVDVPPFGGAK                            | 2 |
|                                                                                                                                                |      |       |      |      |    |   | 2 | AKPYEGSILEADC[330]DILIPAASEK                  | 3 |
| DHPR_HUMAN (P09417) Dihydropteridine reductase (EC 1.5.1.34) (HDHPR) (Quinoid dihydropteridine reductase) [MASS=25803]                         | 1.00 | 15.16 | 0.87 | 0.00 | 2  | 2 | 2 | GAVHQLC[339]QSLAGK                            | 1 |
|                                                                                                                                                |      |       |      |      |    |   | 2 | GAVHQLC[330]QSLAGK                            | 1 |
|                                                                                                                                                |      |       |      |      |    |   | 3 | ARNWWWASVDVVENEEASATIIVK                      | 1 |

|                                                                                                                                                                            |      |       |      |      |    |   |  |   |                                                  |   |
|----------------------------------------------------------------------------------------------------------------------------------------------------------------------------|------|-------|------|------|----|---|--|---|--------------------------------------------------|---|
|                                                                                                                                                                            |      |       |      |      |    |   |  | 3 | GC[339]GPEKDHVYLQLHHLPEQLATR                     | 1 |
|                                                                                                                                                                            |      |       |      |      |    |   |  | 2 | AAFGLSEAGFNTAC[330]VTK                           | 1 |
|                                                                                                                                                                            |      |       |      |      |    |   |  | 3 | AGLPC[339]QDLEFVQFHPTGIYGAGC[339]LITEGC[339]R    | 2 |
| DHSA_HUMAN (P31040) Succinate dehydrogenase [ubiquinone] flavoprotein subunit, mitochondrial precursor (EC 1.3.5.1) (Fp) (Flavoprotein subunit of complex II) [MASS=72691] | 1.00 | 23.49 | 1.34 | 0.10 | 12 | 7 |  | 2 | EPIPVLPVHYNMGGIPTNYK                             | 1 |
|                                                                                                                                                                            |      |       |      |      |    |   |  | 2 | TYFSC[330]TSAHTSTGDGTAM[147]ITR                  | 1 |
|                                                                                                                                                                            |      |       |      |      |    |   |  | 2 | AC[339]ALSIEESC[339]RPGDK                        | 1 |
|                                                                                                                                                                            |      |       |      |      |    |   |  | 3 | HVNGQDQIVPGLYAC[339]GEAAC[339]ASVHGANR           | 1 |
|                                                                                                                                                                            |      |       |      |      |    |   |  | 2 | AC[330]ALSIEESC[330]RPGDK                        | 1 |
|                                                                                                                                                                            |      |       |      |      |    |   |  | 3 | HVNGQDQIVPGLYAC[330]GEAAC[330]ASVHGANR           | 1 |
|                                                                                                                                                                            |      |       |      |      |    |   |  | 2 | AAFGLSEAGFNTAC[339]VTK                           | 1 |
|                                                                                                                                                                            |      |       |      |      |    |   |  | 2 | TYFSC[339]TSAHTSTGDGTAM[147]ITR                  | 1 |
|                                                                                                                                                                            |      |       |      |      |    |   |  | 2 | TYFSC[339]TSAHTSTGDGTAMITR                       | 1 |
|                                                                                                                                                                            |      |       |      |      |    |   |  | 2 | C[330]HTIM[147]NC[330]TR                         | 1 |
|                                                                                                                                                                            |      |       |      |      |    |   |  | 3 | AIAEIKKMMATYK                                    | 1 |
|                                                                                                                                                                            |      |       |      |      |    |   |  | 2 | KDESEQEK                                         | 1 |
| DHSB_HUMAN (P21912) Succinate dehydrogenase [ubiquinone] iron-sulfur protein, mitochondrial precursor (EC 1.3.5.1) (Ip) (Iron-sulfur subunit of complex II) [MASS=31630]   | 1.00 | 18.57 | 1.70 | 0.03 | 7  | 4 |  | 3 | EGIC[339]GSC[339]AMNINGGNTLAC[330]TRR            | 1 |
|                                                                                                                                                                            |      |       |      |      |    |   |  | 2 | C[330]HTIMNC[330]TR                              | 2 |
|                                                                                                                                                                            |      |       |      |      |    |   |  | 2 | C[339]HTIMNC[339]TR                              | 2 |
|                                                                                                                                                                            |      |       |      |      |    |   |  | 2 | C[339]HTIM[147]NC[339]TR                         | 2 |
| DIDO1_HUMAN (Q9BTC0) Death-inducer obliterator 1 (DIO-1) (Death-associated transcription factor 1) (DATF-1) (hDido1) [MASS=243871]                                         | 0.00 | 2.28  | 1.58 | 0.00 | 1  | 2 |  | 3 | ELC[339]LIRFHPATEEEEEVAYISLYSFSSR                | 1 |
|                                                                                                                                                                            |      |       |      |      |    |   |  | 3 | FM[147]IC[330]C[339]DRC[339]EEWFHGDC[339]VGISEAR | 1 |
| DJBP_HUMAN (Q5THR3) DJ-1-binding protein (CAP-binding protein complex-interacting protein 1) [MASS=172929]                                                                 | *    | 4.73  | *    | *    | *  | 4 |  | 1 | NSINSR                                           | 1 |
|                                                                                                                                                                            |      |       |      |      |    |   |  | 2 | QGDINASDFLALVEK                                  | 1 |
|                                                                                                                                                                            |      |       |      |      |    |   |  | 2 | YC[330]M[147]GNQEVSLNQQAKNSKK                    | 1 |
|                                                                                                                                                                            |      |       |      |      |    |   |  | 2 | NLSINNDLNLRYC[330]M[147]GNQEVSLNQQAKNSK          | 1 |
| DLDH_HUMAN (P09622) Dihydrolipoyl dehydrogenase, mitochondrial precursor (EC 1.8.1.4) (Dihydrolipoamide dehydrogenase) (Glycine cleavage system L protein) [MASS=54150]    | 1.00 | 10.41 | 1.77 | 0.05 | 5  | 3 |  | 3 | TVC[339]IEKNETLGGTC[339]LNVGC[339]IPSK           | 1 |
|                                                                                                                                                                            |      |       |      |      |    |   |  | 2 | VC[330]HAHPTLSEAFR                               | 1 |
|                                                                                                                                                                            |      |       |      |      |    |   |  | 2 | NETLGGTC[339]LNVGC[339]IPSK                      | 1 |
|                                                                                                                                                                            |      |       |      |      |    |   |  | 2 | VC[339]HAHPTLSEAFR                               | 2 |
| DLG1_HUMAN (Q12959) Disks large homolog 1 (Synapse-associated protein 97) (SAP-97) (hDlg) [MASS=100354]                                                                    | 0.00 | 1.33  | *    | *    | *  | 1 |  | 2 | FGSC[339]VPHTTRPK                                | 1 |

|                                                                                                                                                                                                        |      |      |      |      |   |   |   |                                                    |   |
|--------------------------------------------------------------------------------------------------------------------------------------------------------------------------------------------------------|------|------|------|------|---|---|---|----------------------------------------------------|---|
| DLG2_HUMAN (Q15700) Discs large homolog 2 (Postsynaptic density protein PSD-93) (Channel-associated protein of synapse-110) (Chapsyn-110) [MASS=97542]                                                 | 0.00 | 4.94 | 1.10 | 0.00 | 1 | 2 | 3 | LRVNDNC[330]ILRVNEVDVSEVSHSK                       | 1 |
|                                                                                                                                                                                                        |      |      |      |      |   |   | 3 | EQM[147]M[147]NHSM[147]SSGSGSLRTNQKR               | 1 |
|                                                                                                                                                                                                        |      |      |      |      |   |   | 2 | EQMMNHSMSSGSGSLRTNQKR                              | 1 |
| DLG3_HUMAN (Q92796) Discs large homolog 3 (Synapse-associated protein 102) (SAP102) (Neuroendocrine-DLG) (XLMR) [MASS=90343]                                                                           | *    | 2.57 | *    | *    | * | 1 | 3 | IIPGGAAAMDGRLGVND[339]VLR                          | 1 |
| DLG5_HUMAN (Q8TDM6) Discs large homolog 5 (Placenta and prostate DLG) (Discs large protein P-dlg) [MASS=202085]                                                                                        | *    | 4.04 | *    | *    | * | 4 | 3 | LEQLGEENQRLLKQTEM[147]LTQQR                        | 1 |
|                                                                                                                                                                                                        |      |      |      |      |   |   | 2 | QAIKALLNGEGAINMVVRR                                | 1 |
|                                                                                                                                                                                                        |      |      |      |      |   |   | 3 | ERDRAVSELAELR                                      | 1 |
|                                                                                                                                                                                                        |      |      |      |      |   |   | 3 | KSC[339]DEDLTSQKVDELGQK                            | 1 |
| DMXL2_HUMAN (Q8TDJ6) Protein DmX-like 2 (Rabconnectin-3) [MASS=339755]                                                                                                                                 | *    | 3.33 | *    | *    | * | 5 | 2 | EKFIPPELSMWDYFVAK                                  | 1 |
|                                                                                                                                                                                                        |      |      |      |      |   |   | 2 | LFSC[339]GADGTLKTRVLPNAFNIPNR                      | 1 |
|                                                                                                                                                                                                        |      |      |      |      |   |   | 2 | RLWHFLVKQEVQLQETFIR                                | 1 |
|                                                                                                                                                                                                        |      |      |      |      |   |   | 2 | C[339]IAGEVAIVRDPDAGEGTK                           | 1 |
|                                                                                                                                                                                                        |      |      |      |      |   |   | 2 | VAKASFQRNNDALDAALFYLSM[147]K                       | 1 |
| DNC_HUMAN (Q9HC21) Mitochondrial deoxynucleotide carrier (Solute carrier family 25 member 19) (Mitochondrial uncoupling protein 1) [MASS=35511]                                                        | 0.56 | 7.50 | 0.56 | 0.00 | 1 | 1 | 2 | GLAPTLIAIFPYAGLQFSC[330]YSSLK                      | 1 |
| DNJA1_HUMAN (P31689) DnaJ homolog subfamily A member 1 (Heat shock 40 kDa protein 4) (DnaJ protein homolog 2) (HSJ-2) (HSDJ) [MASS=44868]                                                              | 0.73 | 2.52 | 1.06 | 0.00 | 1 | 1 | 2 | NVIC[339]DKC[339]EGR                               | 1 |
| DNS2B_HUMAN (Q8WZ79) Deoxyribonuclease-2-beta precursor (EC 3.1.22.1) (Deoxyribonuclease II beta) (DNase II beta) (DNase2-like acid DNase) (DNase II-like acid DNase) (Endonuclease DLAD) [MASS=41712] | 0.00 | 3.32 | 2.97 | 0.00 | 1 | 1 | 2 | RNGQSGIC[339]ITFK                                  | 1 |
|                                                                                                                                                                                                        |      |      |      |      |   |   | 3 | PIC[330]IATDDYESESGSM[147]ISQTVAM[147]AIAGTSVPQLTR | 2 |
| DOCK7_HUMAN (Q96N67) Dedicator of cytokinesis protein 7 [MASS=174363]                                                                                                                                  | 0.00 | 9.79 | 0.20 | 0.00 | 1 | 6 | 2 | YFTESGLVGLLEQAAASFMSMAGMYEAVNEVYK                  | 1 |
|                                                                                                                                                                                                        |      |      |      |      |   |   | 3 | HC[330]SSSIGTIR                                    | 1 |
|                                                                                                                                                                                                        |      |      |      |      |   |   | 2 | IAKGYQTSPDLRLTWLQNMAGK                             | 1 |
|                                                                                                                                                                                                        |      |      |      |      |   |   | 2 | PPVIAGQIVNLGQASFEAM[147]ASIINR                     | 1 |
|                                                                                                                                                                                                        |      |      |      |      |   |   | 2 | MQVTM[147]SLSSLVGTSGNFNEEFLRRSLK                   | 1 |
| DOCK8_HUMAN (Q8NF50) Dedicator of cytokinesis protein 8 [MASS=230819]                                                                                                                                  | *    | 1.43 | *    | *    | * | 1 | 3 | LASARNITIKIQFMC[339]GEDASNAMPVIFGK                 | 1 |

|                                                                                                                                                                              |      |       |      |      |   |   |   |                                              |   |
|------------------------------------------------------------------------------------------------------------------------------------------------------------------------------|------|-------|------|------|---|---|---|----------------------------------------------|---|
| DOCK9_HUMAN (Q9BZ29) Dedicator of cytokinesis protein 9 (Cdc42 guanine nucleotide exchange factor zizimin 1) [MASS=236444]                                                   | *    | 3.24  | *    | *    | * | 3 | 3 | QLC[330]SSAEVDM[147]IKLQLKLGGSVSVQVNAGPLAYAR | 1 |
|                                                                                                                                                                              |      |       |      |      |   |   | 3 | ADMC[339]AALC[339]YEILKC[330]C[330]NSK       | 1 |
|                                                                                                                                                                              |      |       |      |      |   |   | 3 | GNMNSAISVTM[147]RSFK                         | 1 |
| DPOD1_HUMAN (P28340) DNA polymerase delta catalytic subunit (EC 2.7.7.7) (DNA polymerase subunit delta p125) [MASS=123630]                                                   | *    | 5.33  | *    | *    | * | 3 | 3 | VPYVIISAAKGVAAYMK                            | 1 |
|                                                                                                                                                                              |      |       |      |      |   |   | 3 | DPVIQIC[339]SLGLRWGEPEPFLR                   | 1 |
|                                                                                                                                                                              |      |       |      |      |   |   | 3 | DPGSAPSLGDRVPYVIISAAK                        | 1 |
|                                                                                                                                                                              |      |       |      |      |   |   | 2 | FQLTDC[330]QIYEVLSVIR                        | 2 |
| DPYL2_HUMAN (Q16555) Dihydropyrimidinase-related protein 2 (DRP-2) (Collapsin response mediator protein 2) (CRMP-2) (N2A3) [MASS=62293]                                      | 1.00 | 15.21 | 0.60 | 0.16 | 7 | 5 | 2 | DRFQLTDC[330]QIYEVLSVIR                      | 1 |
|                                                                                                                                                                              |      |       |      |      |   |   | 2 | THNSSLEYNIFEGM[147]EC[339]R                  | 1 |
|                                                                                                                                                                              |      |       |      |      |   |   | 2 | FQLTDC[339]QIYEVLSVIR                        | 1 |
|                                                                                                                                                                              |      |       |      |      |   |   | 2 | NLHQSGFSLSGAQIDDNIPRR                        | 1 |
|                                                                                                                                                                              |      |       |      |      |   |   | 2 | GLYDGPVC[330]EVSVTPK                         | 2 |
| DPYL3_HUMAN (Q14195) Dihydropyrimidinase-related protein 3 (DRP-3) (Unc-33-like phosphoprotein) (ULIP protein) (Collapsin response mediator protein 4) (CRMP-4) [MASS=61963] | 0.86 | 4.56  | 1.47 | 0.00 | 1 | 2 | 2 | GAPLVVIC[339]QGGK                            | 1 |
|                                                                                                                                                                              |      |       |      |      |   |   | 2 | IVAPPGGRSNITSLS                              | 1 |
| DRC1A_HUMAN (Q9BY13) Down-regulated by CTNNB1 protein A [MASS=57625]                                                                                                         | 0.00 | 13.82 | 1.13 | 0.00 | 1 | 3 | 2 | QTQRAQSENLELLSLK                             | 1 |
|                                                                                                                                                                              |      |       |      |      |   |   | 2 | NVHSSGC[330]IEALLLGYYNLEIVDKQGHTK            | 1 |
|                                                                                                                                                                              |      |       |      |      |   |   | 3 | SFEQVSGVTVPHNPSSAVGC[339]GAGTDANR            | 1 |
| DSCAM_HUMAN (O60469) Down syndrome cell adhesion molecule precursor (CHD2) [MASS=222258]                                                                                     | *    | 3.63  | *    | *    | * | 4 | 2 | FLITSTGALYIK                                 | 1 |
|                                                                                                                                                                              |      |       |      |      |   |   | 2 | TLKRPTVLEIPMEAAASSASSTR                      | 1 |
|                                                                                                                                                                              |      |       |      |      |   |   | 3 | ARSSMVSTESASSTYEELAR                         | 1 |
|                                                                                                                                                                              |      |       |      |      |   |   | 2 | VSNDVGADVSKSM[147]YLTVK                      | 1 |
| DSCL1_HUMAN (Q8TD84) Down syndrome cell adhesion molecule-like protein 1 precursor (Down syndrome cell adhesion molecule 2) [MASS=224461]                                    | *    | 3.51  | *    | *    | * | 3 | 2 | DSLLEM[147]STSGVGRSQKQGAGAYSK                | 1 |
|                                                                                                                                                                              |      |       |      |      |   |   | 3 | DAKSLAEM[147]LISKNNR                         | 1 |
|                                                                                                                                                                              |      |       |      |      |   |   | 3 | FVVPNNQDGIYGKAGVLNC[330]SVDGYPPPKVMWK        | 1 |
|                                                                                                                                                                              |      |       |      |      |   |   | 2 | DAKSLAEMLISKNNR                              | 1 |
| DSCR2_HUMAN (O95456) Down syndrome critical region protein 2 (Leucine-rich protein C21-LRP) [MASS=32854]                                                                     | *    | 10.07 | *    | *    | * | 1 | 3 | DSAC[330]C[339]PLLEQPNIHDLPAAVLSYC[339]QVWK  | 1 |
| DYH11_HUMAN (Q96DT5) Ciliary dynein heavy chain 11 (Axonemal beta dynein heavy chain 11) [MASS=520977]                                                                       | *    | 2.17  | *    | *    | * | 5 | 2 | QSTLELRQPPEESFILK                            | 1 |
|                                                                                                                                                                              |      |       |      |      |   |   | 3 | EIHNC[330]QYVAC[339]M[147]NPMVGSFTISPRLQR    | 1 |
|                                                                                                                                                                              |      |       |      |      |   |   | 2 | WVESEC[330]PEKEK                             | 1 |
|                                                                                                                                                                              |      |       |      |      |   |   | 2 | SIGNIYKGLVQTGAWGC[339]FDEFNR                 | 1 |
|                                                                                                                                                                              |      |       |      |      |   |   | 3 | QIEC[339]GHVVLNKNM[147]PFTSGNMK              | 1 |

|                                                                                                                                                                                                  |      |       |      |      |   |   |   |                                            |   |
|--------------------------------------------------------------------------------------------------------------------------------------------------------------------------------------------------|------|-------|------|------|---|---|---|--------------------------------------------|---|
| DYHC_HUMAN (Q14204) Dynein heavy chain, cytosolic (DYHC) (Cytoplasmic dynein heavy chain 1) (DHC1) (Dynein heavy chain 1, cytoplasmic 1) [MASS=532404]                                           | 0.59 | 4.48  | 1.11 | 0.00 | 1 | 9 | 2 | IRQALVAIFTHLR                              | 1 |
|                                                                                                                                                                                                  |      |       |      |      |   |   | 3 | M[147]NTLLANGEVPLGFEGDEYATLMTQC[330]KEGAQK | 1 |
|                                                                                                                                                                                                  |      |       |      |      |   |   | 3 | NLESALRFGNPLLVDVESYDPVLPVLPVLR             | 1 |
|                                                                                                                                                                                                  |      |       |      |      |   |   | 2 | TLMAQSIYGGKRVDFDQRLNLTFLER                 | 1 |
|                                                                                                                                                                                                  |      |       |      |      |   |   | 2 | QHLVEVRSM[147]ANPPAAVK                     | 1 |
|                                                                                                                                                                                                  |      |       |      |      |   |   | 3 | EVDGLDVSKEGTEAWAAM[147]KR                  | 1 |
|                                                                                                                                                                                                  |      |       |      |      |   |   | 2 | VAAPDVVVPTLDTVRHEALLYTWLAEHK               | 1 |
|                                                                                                                                                                                                  |      |       |      |      |   |   | 2 | NIHVC[330]LGGLFVPEAYITATR                  | 1 |
|                                                                                                                                                                                                  |      |       |      |      |   |   | 2 | LSLPPNVRIMFEVQDLK                          | 1 |
| DYL1_HUMAN (P63167) Dynein light chain 1, cytoplasmic (Dynein light chain LC8-type 1) (8 kDa dynein light chain) (DLC8) (Protein inhibitor of neuronal nitric oxide synthase) (PIN) [MASS=10366] | 0.81 | 12.36 | 0.71 | 0.00 | 1 | 1 | 2 | YNPTWHC[339]IVGR                           | 1 |
|                                                                                                                                                                                                  |      |       |      |      |   |   | 2 | C[330]VDM[147]VISELISTVR                   | 1 |
|                                                                                                                                                                                                  |      |       |      |      |   |   | 3 | EFIFSELLANLYSC[339]GDQNTLM[147]EESAEQAQR   | 1 |
| DYN1_HUMAN (Q05193) Dynammin-1 (EC 3.6.5.5) [MASS=97407]                                                                                                                                         | 1.00 | 9.38  | 0.61 | 0.06 | 6 | 4 | 3 | EFIFSELLANLYSC[330]GDQNTLM[147]EESAEQAQR   | 2 |
|                                                                                                                                                                                                  |      |       |      |      |   |   | 2 | C[330]VDMVISELISTVR                        | 1 |
|                                                                                                                                                                                                  |      |       |      |      |   |   | 1 | ELRREISYAIK                                | 1 |
|                                                                                                                                                                                                  |      |       |      |      |   |   | 3 | EFIFSELLANLYSC[330]GDQNTLM[EESAEQAQR       | 1 |
|                                                                                                                                                                                                  |      |       |      |      |   |   | 2 | PGSRGPAPGPPAGSALGGAPPVPSR                  | 1 |
| DYN3_HUMAN (Q9UQ16) Dynammin-3 (EC 3.6.5.5) (Dynammin, testicular) (T-dynammin) [MASS=96681]                                                                                                     | 0.00 | 0.81  | 0.26 | 0.00 | 1 | 1 | 2 | LC[330]EETER                               | 1 |
| DYRL1_HUMAN (Q86XF0) Dihydrofolate reductase-like protein 1 [MASS=21620]                                                                                                                         | 0.00 | 5.88  | 0.73 | 0.05 | 2 | 1 | 2 | HIKYKFEVC[330]JEK                          | 2 |
| DYSF_HUMAN (O75923) Dysferlin (Dystrophy-associated fer-1-like protein) (Fer-1-like protein 1) [MASS=237293]                                                                                     | *    | 2.31  | *    | *    | * | 3 | 2 | EFTGFDPDPYTELNTGK                          | 1 |
|                                                                                                                                                                                                  |      |       |      |      |   |   | 3 | GWM[147]IGFEEHKQK                          | 1 |
|                                                                                                                                                                                                  |      |       |      |      |   |   | 3 | LPGGQWIYMSDNYTDVNGEK                       | 1 |
| E2F1_HUMAN (Q01094) Transcription factor E2F1 (E2F-1) (Retinoblastoma-binding protein 3) (RBBP-3) (PRB-binding protein E2F-1) (PBR3) (Retinoblastoma-associated protein 1) (RBAP-1) [MASS=46920] | 0.00 | 10.53 | 0.92 | 0.00 | 1 | 2 | 2 | MALAGAPAGGPC[339]APALEALLGAGALR            | 1 |
|                                                                                                                                                                                                  |      |       |      |      |   |   | 2 | LLEDTDSQRLAYVTC[339]QDLR                   | 1 |
| E2F5_HUMAN (Q15329) Transcription factor E2F5 (E2F-5) [MASS=37610]                                                                                                                               | 0.00 | 8.67  | 1.03 | 0.00 | 1 | 1 | 3 | LSPTPADDYNFNLDDNEGVC[330]DLFDVQILNY        | 1 |
| E41L1_HUMAN (Q9H4G0) Band 4.1-like protein 1 (Neuronal protein 4.1) (4.1N) [MASS=98502]                                                                                                          | 0.00 | 4.65  | 0.65 | 0.00 | 1 | 2 | 3 | GAC[339]STPDM[147]PQFEPVKTTETMTVSSLAIR     | 1 |
|                                                                                                                                                                                                  |      |       |      |      |   |   | 2 | YTM[147]SRSLDGAEFR                         | 1 |



|                                                                                                                                                                                                                                                              |      |       |      |      |    |   |   |                                       |   |
|--------------------------------------------------------------------------------------------------------------------------------------------------------------------------------------------------------------------------------------------------------------|------|-------|------|------|----|---|---|---------------------------------------|---|
| E41L3_HUMAN (Q9Y2J2) Band 4.1-like protein 3 (4.1B) (Differentially expressed in adenocarcinoma of the lung protein 1) (DAL-1) [MASS=120677]                                                                                                                 | 0.99 | 7.54  | 1.01 | 0.00 | 1  | 3 | 3 | QVRSGAWHFSFNVKFYPPDPAQLSEDIR          | 1 |
|                                                                                                                                                                                                                                                              |      |       |      |      |    |   | 3 | IVITGDADIDHDQALAQAIKEAKEQHPDMSVTK     | 2 |
|                                                                                                                                                                                                                                                              |      |       |      |      |    |   | 2 | IVITGDADIDHDQALAQAIK                  | 1 |
| EAA1_HUMAN (P43003) Excitatory amino acid transporter 1 (Sodium-dependent glutamate/aspartate transporter 1) (Glial glutamate transporter) (GLAST-1) [MASS=59572]                                                                                            | *    | 6.27  | *    | *    | *  | 2 | 2 | HELKNRDVEM[147]GNSVIEENEM[147]K       | 1 |
|                                                                                                                                                                                                                                                              |      |       |      |      |    |   | 3 | NM[147]FPPNLVEAC[330]FK               | 1 |
|                                                                                                                                                                                                                                                              |      |       |      |      |    |   | 2 | DGM[147]NVLGLIGFFIAFGIAM[147]GK       | 1 |
|                                                                                                                                                                                                                                                              |      |       |      |      |    |   | 2 | C[330]LEENLGIDKR                      | 1 |
|                                                                                                                                                                                                                                                              |      |       |      |      |    |   | 3 | NLFPENLVQAC[330]FQQIQTVTKK            | 1 |
|                                                                                                                                                                                                                                                              |      |       |      |      |    |   | 2 | NLFPENLVQAC[330]FQQIQTVTK             | 4 |
| EAA2_HUMAN (P43004) Excitatory amino acid transporter 2 (Sodium-dependent glutamate/aspartate transporter 2) [MASS=62104]                                                                                                                                    | 1.00 | 16.38 | 0.54 | 0.24 | 11 | 5 | 2 | NLFPENLVQAC[330]FQQIQTVTKK            | 1 |
|                                                                                                                                                                                                                                                              |      |       |      |      |    |   | 3 | ESNSNQC[330]VYAAHNSVIVDEC[330]K       | 1 |
|                                                                                                                                                                                                                                                              |      |       |      |      |    |   | 2 | ESNSNQC[330]VYAAHNSVIVDEC[330]K       | 1 |
|                                                                                                                                                                                                                                                              |      |       |      |      |    |   | 2 | NLFPENLVQAC[339]FQQIQTVTK             | 1 |
|                                                                                                                                                                                                                                                              |      |       |      |      |    |   | 2 | C[339]LEENLGIDKR                      | 1 |
|                                                                                                                                                                                                                                                              |      |       |      |      |    |   | 3 | EVEAVIPDHC[339]IFASNTSALPISEIAAVSK    | 2 |
|                                                                                                                                                                                                                                                              |      |       |      |      |    |   | 2 | ALM[147]GLYHGQVLC[330]K               | 1 |
|                                                                                                                                                                                                                                                              |      |       |      |      |    |   | 2 | QFTPC[339]QLLADHANSFNKK               | 1 |
| ECHA_HUMAN (P40939) Trifunctional enzyme subunit alpha, mitochondrial precursor (TP-alpha) (78 kDa gastrin-binding protein) [Includes: Long-chain enoyl-CoA hydratase (EC 4.2.1.17); Long chain 3-hydroxyacyl-CoA dehydrogenase (EC 1.1.1.211)] [MASS=82999] | 1.00 | 7.86  | 1.43 | 0.05 | 7  | 3 | 2 | ALM[147]GLYHGQVLC[339]K               | 1 |
|                                                                                                                                                                                                                                                              |      |       |      |      |    |   | 2 | QFTPC[339]QLLADHANSFNKK               | 1 |
|                                                                                                                                                                                                                                                              |      |       |      |      |    |   | 2 | ALM[147]GLYHGQVLC[339]K               | 1 |
|                                                                                                                                                                                                                                                              |      |       |      |      |    |   | 3 | QFTPC[330]QLLADHANSFNKK               | 1 |
|                                                                                                                                                                                                                                                              |      |       |      |      |    |   | 3 | QFTPC[339]QLLADHANSFNKK               | 1 |
|                                                                                                                                                                                                                                                              |      |       |      |      |    |   | 3 | QFTPC[339]QLLADHANSFNKK               | 1 |
| ECHB_HUMAN (P55084) Trifunctional enzyme subunit beta, mitochondrial precursor (TP-beta) [Includes: 3-ketoacyl-CoA thiolase (EC 2.3.1.16) (Acetyl-CoA acyltransferase) (Beta-ketothiolase)] [MASS=51395]                                                     | 1.00 | 5.68  | 1.18 | 0.05 | 2  | 1 | 3 | EGGQYGLVAAC[339]AAGGQGHAM[147]IVEAYPK | 1 |
|                                                                                                                                                                                                                                                              |      |       |      |      |    |   | 3 | EGGQYGLVAAC[339]AAGGQGHAMIVEAYPK      | 1 |
|                                                                                                                                                                                                                                                              |      |       |      |      |    |   |   |                                       |   |

|                                                                                                                                                                                                                       |      |       |      |      |    |   |   |                                         |   |
|-----------------------------------------------------------------------------------------------------------------------------------------------------------------------------------------------------------------------|------|-------|------|------|----|---|---|-----------------------------------------|---|
| ECHM_HUMAN (P30084) Enoyl-CoA hydratase, mitochondrial precursor (EC 4.2.1.17) (Short chain enoyl-CoA hydratase) (SCEH) (Enoyl-CoA hydratase 1) [MASS=31387]                                                          | 1.00 | 22.41 | 2.22 | 0.04 | 9  | 3 | 2 | ALNALC[330]DGLIDELNQALK                 | 1 |
|                                                                                                                                                                                                                       |      |       |      |      |    |   | 3 | IC[330]PVETLVVEEAIQC[330]AEK            | 1 |
|                                                                                                                                                                                                                       |      |       |      |      |    |   | 2 | ALNALC[339]DGLIDELNQALK                 | 2 |
|                                                                                                                                                                                                                       |      |       |      |      |    |   | 3 | IC[339]PVETLVVEEAIQC[339]AEK            | 1 |
|                                                                                                                                                                                                                       |      |       |      |      |    |   | 2 | IC[330]PVETLVVEEAIQC[330]AEK            | 1 |
| ECHP_HUMAN (Q08426) Peroxisomal bifunctional enzyme (PBE) (PBE) [Includes: Enoyl-CoA hydratase (EC 4.2.1.17); 3,2-trans-enoil-CoA isomerase (EC 5.3.3.8); 3-hydroxyacyl-CoA dehydrogenase (EC 1.1.1.35)] [MASS=79208] | *    | 13.71 | *    | *    | *  | 4 | 3 | LC[339]NKPIQSLPNMDSIFSEALLK             | 1 |
|                                                                                                                                                                                                                       |      |       |      |      |    |   | 2 | LQKYRQNPDIQLEPSDYLK                     | 1 |
|                                                                                                                                                                                                                       |      |       |      |      |    |   | 2 | ILGEGIAASPEHIDVVYLHGYGC[339]JARHK       | 1 |
|                                                                                                                                                                                                                       |      |       |      |      |    |   | 3 | QHPGC[330]LAQEAC[339]VRAVQAAVQYPYEVGIKK | 1 |
|                                                                                                                                                                                                                       |      |       |      |      |    |   | 3 | QHPGC[330]LAQEAC[339]VRAVQAAVQYPYEVGIKK | 1 |
| EF1A1_HUMAN (P68104) Elongation factor 1-alpha 1 (EF-1-alpha-1) (Elongation factor 1 A-1) (eEF1A-1) (Elongation factor Tu) (EF-Tu) [MASS=50141]                                                                       | 1.00 | 9.09  | 0.65 | 0.00 | 2  | 2 | 3 | DGNASGTTLLEALDC[339]ILPPTRPTDKPLR       | 1 |
|                                                                                                                                                                                                                       |      |       |      |      |    |   | 2 | TIEKFEKEAAEMGK                          | 1 |
|                                                                                                                                                                                                                       |      |       |      |      |    |   | 3 | DGNASGTTLLEALDC[330]ILPPTRPTDKPLR       | 1 |
| EF1A2_HUMAN (Q05639) Elongation factor 1-alpha 2 (EF-1-alpha-2) (Elongation factor 1 A-2) (eEF1A-2) (Statin S1) [MASS=50470]                                                                                          | 0.00 | 1.94  | 0.56 | 0.00 | 1  | 1 | 2 | RGNVC[330]GDSK                          | 1 |
|                                                                                                                                                                                                                       |      |       |      |      |    |   | 3 | HYAHTDC[330]PGHADYVK                    | 2 |
|                                                                                                                                                                                                                       |      |       |      |      |    |   | 2 | KGDEC[339]ELLGHSK                       | 3 |
|                                                                                                                                                                                                                       |      |       |      |      |    |   | 1 | KGDEC[339]ELLGHSK                       | 1 |
|                                                                                                                                                                                                                       |      |       |      |      |    |   | 2 | HYAHTDC[339]PGHADYVK                    | 2 |
| EFTU_HUMAN (P49411) Elongation factor Tu, mitochondrial precursor (EF-Tu) (P43) [MASS=49541]                                                                                                                          | 1.00 | 11.95 | 1.35 | 0.11 | 12 | 3 | 1 | KGDEC[339]ELLGHSK                       | 1 |
|                                                                                                                                                                                                                       |      |       |      |      |    |   | 2 | HYAHTDC[339]PGHADYVK                    | 2 |
|                                                                                                                                                                                                                       |      |       |      |      |    |   | 3 | HYAHTDC[339]PGHADYVK                    | 1 |
|                                                                                                                                                                                                                       |      |       |      |      |    |   | 2 | HYAHTDC[330]PGHADYVK                    | 2 |
|                                                                                                                                                                                                                       |      |       |      |      |    |   | 3 | ELLTEFGYKGEETPVIVGSALC[339]ALEGR        | 1 |
| ENC1_HUMAN (O14682) Ectoderm-neural cortex 1 protein (ENC-1) (p53-induced protein 10) (Nuclear matrix protein NRP/B) [MASS=66129]                                                                                     | *    | 4.24  | *    | *    | *  | 2 | 2 | LKLFAFGGTSVSHDKLPK                      | 1 |
|                                                                                                                                                                                                                       |      |       |      |      |    |   | 1 | VYITGGR                                 | 1 |

|                                                                                                                                                                                                                                                    |      |      |      |      |   |   |   |                                         |   |
|----------------------------------------------------------------------------------------------------------------------------------------------------------------------------------------------------------------------------------------------------|------|------|------|------|---|---|---|-----------------------------------------|---|
| ENOA_HUMAN (P06733) Alpha-enolase (EC 4.2.1.11) (2-phospho-D-glycerate hydro-lyase) (Non-neural enolase) (NNE) (Enolase 1) (Phosphopyruvate hydratase) (C-myc promoter-binding protein) (MBP-1) (MPB-1) (Plasminogen-binding protein) [MASS=47037] | 0.00 | 6.47 | *    | *    | * | 2 | 2 | SGETEDTFIADLVVGLC[330]TGQIK             | 2 |
|                                                                                                                                                                                                                                                    |      |      |      |      |   |   | 2 | SGETEDTFIADLVVGLC[339]TGQIK             | 2 |
|                                                                                                                                                                                                                                                    |      |      |      |      |   |   | 2 | TGAPC[330]R                             | 2 |
|                                                                                                                                                                                                                                                    |      |      |      |      |   |   | 3 | SGETEDTFIADLVVGLC[330]TGQIK             | 1 |
| ENOG_HUMAN (P09104) Gamma-enolase (EC 4.2.1.11) (2-phospho-D-glycerate hydro-lyase) (Neural enolase) (Neuron-specific enolase) (NSE) (Enolase 2) [MASS=47137]                                                                                      | 1.00 | 3.46 | 0.59 | 0.07 | 8 | 1 | 2 | VNQIGSVTEAIQAC[330]K                    | 1 |
| ENP2_HUMAN (Q9Y5L3) Ectonucleoside triphosphate diphosphohydrolase 2 (EC 3.6.1.-) (NTPDase2) (Ecto-ATPase) (CD39 antigen-like 1) [MASS=53665]                                                                                                      | *    | 8.08 | *    | *    | * | 2 | 3 | VSLSGSSDPHLC[339]R                      | 2 |
|                                                                                                                                                                                                                                                    |      |      |      |      |   |   | 3 | DVREPPALKYGIVLDAGSSHTSMFIYK             | 1 |
| ENP3_HUMAN (O75355) Ectonucleoside triphosphate diphosphohydrolase 3 (EC 3.6.1.5) (NTPDase3) (Ecto-ATP diphosphohydrolase) (ATPDase) (Ecto-apyrase) (CD39 antigen-like 3) (HB6) [MASS=59133]                                                       | 0.26 | 7.56 | 2.03 | 0.00 | 1 | 2 | 2 | QEVLPPLKYGIVLDAGSSR                     | 1 |
|                                                                                                                                                                                                                                                    |      |      |      |      |   |   | 3 | C[339]SVKKGSGISSYGNPNQDVPR              | 1 |
| EPHA1_HUMAN (P21709) Ephrin type-A receptor 1 precursor (EC 2.7.10.1) (Tyrosine-protein kinase receptor EPH) [MASS=108066]                                                                                                                         | 0.00 | 3.18 | 0.61 | 0.00 | 1 | 1 | 3 | SFPGGAGPLGC[330]KETFNLLYMESDQDVGIQLR    | 1 |
| EPHA4_HUMAN (P54764) Ephrin type-A receptor 4 precursor (EC 2.7.10.1) (Tyrosine-protein kinase receptor SEK) (Receptor protein-tyrosine kinase HEK8) [MASS=109859]                                                                                 | 0.00 | 4.56 | 2.85 | 0.00 | 1 | 2 | 3 | C[339]KPVMIIITEYM[147]ENGSLDAFLRK       | 1 |
|                                                                                                                                                                                                                                                    |      |      |      |      |   |   | 2 | SGEC[330]QAC[330]KIGIYYKALSTDATC[330]AK | 1 |
| EPHB1_HUMAN (P54762) Ephrin type-B receptor 1 precursor (EC 2.7.10.1) (Tyrosine-protein kinase receptor EPH-2) (NET) (HEK6) (ELK) [MASS=109885]                                                                                                    | 0.00 | 9.15 | 1.12 | 0.00 | 1 | 5 | 3 | ARTVAGYGKFSGK                           | 1 |
|                                                                                                                                                                                                                                                    |      |      |      |      |   |   | 3 | C[339]DDNVEFVPR                         | 1 |
|                                                                                                                                                                                                                                                    |      |      |      |      |   |   | 3 | FAEIVNTLDKM[147]IRNPASLK                | 1 |
|                                                                                                                                                                                                                                                    |      |      |      |      |   |   | 3 | NVISIVNETSIILEWHPPR                     | 1 |
|                                                                                                                                                                                                                                                    |      |      |      |      |   |   | 3 | M[147]VQYRDSFLTAGFTSLQLVTQM[147]TSEDLLR | 1 |
| EPHB3_HUMAN (P54753) Ephrin type-B receptor 3 precursor (EC 2.7.10.1) (Tyrosine-protein kinase receptor HEK-2) [MASS=110329]                                                                                                                       | 0.00 | 7.21 | *    | *    | * | 4 | 3 | ESFVSAGFASFDLVAQM[147]TAEDLLR           | 1 |
|                                                                                                                                                                                                                                                    |      |      |      |      |   |   | 2 | TTSPAASIC[339]TC[339]HNNFYR             | 1 |
|                                                                                                                                                                                                                                                    |      |      |      |      |   |   | 2 | KQRHGSDSEYTEK                           | 1 |
|                                                                                                                                                                                                                                                    |      |      |      |      |   |   | 2 | FLEDDPSDPTYTSSLGGK                      | 1 |
| EPN2_HUMAN (O95208) Epsin-2 (EPS-15-interacting protein 2) [MASS=68553]                                                                                                                                                                            | 0.00 | 3.27 | 2.03 | 0.00 | 1 | 1 | 2 | AGGSPASYHGSPEASLC[339]PQHR              | 1 |

|                                                                                                                                                                                                                                                                               |      |       |       |      |   |   |   |                                  |   |
|-------------------------------------------------------------------------------------------------------------------------------------------------------------------------------------------------------------------------------------------------------------------------------|------|-------|-------|------|---|---|---|----------------------------------|---|
| ERBB3_HUMAN (P21860) Receptor tyrosine-protein kinase erbB-3 precursor (EC 2.7.10.1) (c-erbB3) (Tyrosine kinase-type cell surface receptor HER3) [MASS=148097]                                                                                                                | 0.00 | 4.62  | 0.44  | 0.00 | 1 | 3 | 2 | LAQPQIC[330]TIDVYM[147]VM[147]VK | 1 |
|                                                                                                                                                                                                                                                                               |      |       |       |      |   |   | 3 | IYISANRQLC[330]YHHSLNWTK         | 1 |
|                                                                                                                                                                                                                                                                               |      |       |       |      |   |   | 3 | NVLLKSPSQVQVADFGVADLLPPDDK       | 1 |
| ERCC3_HUMAN (P19447) TFIIH basal transcription factor complex helicase XPB subunit (EC 3.6.1.-) (Basic transcription factor 2 89 kDa subunit) (BTF2-p89) (TFIIH 89 kDa subunit) (DNA-repair protein complementing XP-B cells) (Xeroderma pigmentosum group B-c) [MASS=89277]  | 0.00 | 2.56  | 14.83 | 0.00 | 1 | 1 | 2 | RC[339]LVLGNSAVSVEQWKAQFK        | 1 |
| ERN2_HUMAN (Q76MJ5) Serine/threonine-protein kinase/endoribonuclease IRE2 precursor (Inositol-requiring protein 2) (hIRE2p) (IRE1b) (Ire1-beta) (Endoplasmic reticulum-to-nucleus signaling 2) [Includes: Serine/threonine-protein kinase (EC 2.7.11.1); Endor] [MASS=102250] | *    | 0.65  | *     | *    | * | 1 | 2 | KFRSYK                           | 1 |
| ERR2_HUMAN (O95718) Steroid hormone receptor ERR2 (Estrogen-related receptor, beta) (ERR-beta) (Estrogen receptor-like 2) (ERR beta-2) [MASS=55619]                                                                                                                           | 0.00 | 6.80  | 0.41  | 0.00 | 1 | 2 | 2 | SC[330]QAC[330]RFM[147]KC[330]LK | 1 |
|                                                                                                                                                                                                                                                                               |      |       |       |      |   |   | 3 | TIQGNIEYSC[339]PATNEC[330]EITKRR | 1 |
| ES1_HUMAN (P30042) ES1 protein homolog, mitochondrial precursor (Protein KNP-I) (Protein GT335) [MASS=28142]                                                                                                                                                                  | 1.00 | 12.69 | 1.44  | 0.02 | 2 | 2 | 2 | EFHQAGKPIGLC[339]C[339]IAPVLAAK  | 1 |
|                                                                                                                                                                                                                                                                               |      |       |       |      |   |   | 2 | NLSTFAVDGKDC[339]K               | 1 |
| ETF_A_HUMAN (P13804) Electron transfer flavoprotein subunit alpha, mitochondrial precursor (Alpha-ETF) [MASS=35079]                                                                                                                                                           | 0.71 | 4.80  | 1.80  | 0.00 | 1 | 1 | 2 | QFNYTHIC[339]AGASAFGK            | 1 |
| ETFD_HUMAN (Q16134) Electron transfer flavoprotein-ubiquinone oxidoreductase, mitochondrial precursor (EC 1.5.5.1) (ETF-QO) (ETF-ubiquinone oxidoreductase) (ETF dehydrogenase) (Electron-transferring-flavoprotein dehydrogenase) [MASS=68507]                               | 0.91 | 1.94  | 1.94  | 0.00 | 1 | 1 | 2 | LQINAQNC[339]VHC[339]K           | 1 |
| ETS1_HUMAN (P14921) C-ets-1 protein (p54) [MASS=50408]                                                                                                                                                                                                                        | *    | 2.95  | *     | *    | * | 1 | 2 | FC[330]MNGAALC[330]ALGK          | 1 |
| F102B_HUMAN (Q5T8I3) Protein FAM102B [MASS=35629]                                                                                                                                                                                                                             | *    | 6.99  | *     | *    | * | 1 | 3 | TPPSTSMSIPIAGESESLQEDRK          | 1 |

|                                                                                                                                                                                                                                                                        |      |       |       |      |   |   |   |                                        |   |
|------------------------------------------------------------------------------------------------------------------------------------------------------------------------------------------------------------------------------------------------------------------------|------|-------|-------|------|---|---|---|----------------------------------------|---|
| F263_HUMAN (Q16875) 6-phosphofructo-2-kinase/fructose-2,6-biphosphatase 3 (6PF-2-K/Fru-2,6-P2ASE brain/placenta-type isozyme) (iPFK-2) (NY-REN-56 antigen) [Includes: 6-phosphofructo-2-kinase (EC 2.7.1.105); Fructose-2,6-bisphosphatase (EC 3.1.3.46)] [MASS=59609] | 0.00 | 5.38  | 1.07  | 0.00 | 1 | 2 | 2 | VESIYLNVESVC[339]THR                   | 1 |
|                                                                                                                                                                                                                                                                        |      |       |       |      |   |   | 2 | DC[339]NSAEAM[147]DDFM[147]K           | 1 |
| FA20A_HUMAN (Q96MK3) Protein FAM20A precursor [MASS=61404]                                                                                                                                                                                                             | *    | 5.18  | *     | *    | * | 1 | 3 | ASSLARDSAAAASDPGTIVHNFSRTEPR           | 1 |
| FA43B_HUMAN (Q6ZT52) Protein FAM43B [MASS=36776]                                                                                                                                                                                                                       | *    | 4.86  | *     | *    | * | 1 | 2 | AVVLRRC[330]HAVLLARAHK                 | 2 |
| FA49A_HUMAN (Q9H0Q0) Protein FAM49A [MASS=37313]                                                                                                                                                                                                                       | 0.00 | 7.12  | 2.02  | 0.00 | 1 | 1 | 2 | VMVGVIIYDHSVHPVGAFC[339]KTSK           | 1 |
| FA50B_HUMAN (Q9Y247) Protein FAM50B (XAP-5-like protein) [MASS=38708]                                                                                                                                                                                                  | 0.00 | 7.08  | 1.50  | 0.00 | 1 | 1 | 2 | KISC[330]LSFALDDLDQADAAEARR            | 1 |
| FA5_HUMAN (P12259) Coagulation factor V precursor (Activated protein C cofactor) [Contains: Coagulation factor V heavy chain; Coagulation factor V light chain] [MASS=251670]                                                                                          | 0.00 | 3.87  | 12.91 | 0.00 | 1 | 3 | 3 | WNILEFDEPTENDAQC[339]LTRPYSDVDIMR      | 1 |
|                                                                                                                                                                                                                                                                        |      |       |       |      |   |   | 3 | HM[147]KRWEYFIAAEEVIWDYAPVIPANM[147]DK | 1 |
|                                                                                                                                                                                                                                                                        |      |       |       |      |   |   | 3 | C[339]IPDDEDSYEIFEPPESTMATRKMHDR       | 1 |
| FAAA_HUMAN (P16930) Fumarylacetoacetase (EC 3.7.1.2) (Fumarylacetoacetate hydrolase) (Beta-diketonase) (FAA) [MASS=46374]                                                                                                                                              | *    | 3.82  | *     | *    | * | 1 | 2 | DIQKWEYVPLGPFLGK                       | 1 |
| FAM3C_HUMAN (Q92520) Protein FAM3C precursor (Protein GS3786) [MASS=24680]                                                                                                                                                                                             | 0.00 | 12.33 | 1.11  | 0.00 | 1 | 1 | 3 | IC[339]LEDNVLM[147]SGVKNNVGRGINVALANGK | 1 |
|                                                                                                                                                                                                                                                                        |      |       |       |      |   |   | 2 | IVIILSEGREERIYNQSQSNK                  | 1 |
|                                                                                                                                                                                                                                                                        |      |       |       |      |   |   | 3 | YLEIKEISDANYVSNQALIPRDHSHK             | 1 |
| FANCM_HUMAN (Q8IYD8) Fanconi anemia group M protein (EC 3.6.1.-) (ATP-dependent RNA helicase FANCM) (Protein FACM) (Fanconi anemia-associated polypeptide of 250 kDa) (FAAP250) (Protein Hef ortholog) [MASS=232190]                                                   | 0.00 | 5.27  | 1.85  | 0.00 | 2 | 6 | 2 | VM[147]TFVGHASGK                       | 1 |
|                                                                                                                                                                                                                                                                        |      |       |       |      |   |   | 1 | VSKEIK                                 | 3 |
|                                                                                                                                                                                                                                                                        |      |       |       |      |   |   | 3 | SC[339]HSVEDGQLLTSNESEDEIFRR           | 2 |
|                                                                                                                                                                                                                                                                        |      |       |       |      |   |   | 3 | FIEQIHLQSM[147]FERIC[330]VIVEK         | 1 |
| FARP1_HUMAN (Q9Y4F1) FERM, RhoGEF and pleckstrin domain-containing protein 1 (Chondrocyte-derived ezrin-like protein) [MASS=118632]                                                                                                                                    | *    | 2.68  | *     | *    | * | 1 | 3 | DC[339]RAALAEITEMVAQLHGTMIKMENFQK      | 1 |

|                                                                                                                                                                                           |      |       |       |      |   |   |   |                                                                                                                                                                                                                                                                                                      |                                 |
|-------------------------------------------------------------------------------------------------------------------------------------------------------------------------------------------|------|-------|-------|------|---|---|---|------------------------------------------------------------------------------------------------------------------------------------------------------------------------------------------------------------------------------------------------------------------------------------------------------|---------------------------------|
| FARP2_HUMAN (O94887) FERM, RhoGEF and pleckstrin domain-containing protein 2 (FERM domain including RhoGEF) (FIR) [MASS=119888]                                                           | 0.00 | 2.47  | 10.14 | 0.00 | 1 | 2 | 2 | IC[339]VEYHTFFR<br>VKLLDNTM[147]EIFDIEPK                                                                                                                                                                                                                                                             | 1<br>1                          |
| FBLN2_HUMAN (P98095) Fibulin-2 precursor [MASS=126543]                                                                                                                                    | 0.00 | 2.03  | *     | *    | * | 1 | 3 | C[330]GEGQVC[330]HNLPGSYRC[330]DC[330]KAGFQR                                                                                                                                                                                                                                                         | 1                               |
| FBN1_HUMAN (P35555) Fibrillin-1 precursor [MASS=312312]                                                                                                                                   | *    | 5.33  | *     | *    | * | 8 | 2 | C[330]APGTC[330]QNLDGSYR<br>NMC[330]LNGM[147]C[330]INEDGSFK<br>C[339]PPGFYTSPDGTR<br>NC[339]TDIDEC[330]RISPDLC[330]GR<br>DLDEC[330]ATKQHNC[339]QFLC[330]VNTIGGFTC[330]K<br>C[339]VNTYGSYEC[330]KC[330]PVGYYLVR<br>DINEC[330]ETPGIC[330]MNGRC[330]VNTDGSYR<br>GSYTC[330]EC[330]NDGFTASPNQDEC[339]LDNR | 1<br>1<br>1<br>1<br>1<br>1<br>1 |
| FBN2_HUMAN (P35556) Fibrillin-2 precursor [MASS=314347]                                                                                                                                   | *    | 1.75  | *     | *    | * | 2 | 3 | FGPRGDGSLSC[330]NTEIGVGSRSSC[339]C[339]C[330]SLGK<br>GYIGTYC[330]GQPVC[330]JENGCC[330]QNGGR                                                                                                                                                                                                          | 1<br>1                          |
| FBW1A_HUMAN (Q9Y297) F-box/WD repeat protein 1A (F-box and WD repeats protein beta-TrCP) (E3RSIkappaB) (plkappaBalph-E3 receptor subunit) [MASS=68866]                                    | *    | 4.63  | *     | *    | * | 1 | 3 | NSLRQTYNSC[339]ARLC[339]LNQETVC[330]LASTAM[147]K                                                                                                                                                                                                                                                     | 1                               |
| FCRL_HUMAN (Q7L513) Fc receptor-like and mucin-like 1 precursor (Fc receptor homolog expressed in B-cells) (Fc receptor-related protein X) (FcRX) (Fc receptor-like protein) [MASS=38927] | 0.00 | 5.57  | 1.12  | 0.00 | 1 | 1 | 2 | AVPSAEPQAGSPM[147]TLSC[330]QTK                                                                                                                                                                                                                                                                       | 1                               |
| FGD3_HUMAN (Q5JSP0) FYVE, RhoGEF and PH domain-containing protein 3 (Zinc finger FYVE domain-containing protein 5) [MASS=79400]                                                           | *    | 4.00  | *     | *    | * | 1 | 2 | LLEVYEQLGGEEDIVNPANELIKEGQIQK                                                                                                                                                                                                                                                                        | 1                               |
| FGD5_HUMAN (Q6ZNL6) FYVE, RhoGEF and PH domain-containing protein 5 (Zinc finger FYVE domain-containing protein 23) [MASS=159906]                                                         | 0.00 | 3.42  | 1.34  | 0.00 | 1 | 5 | 2 | YLGLLSENC[330]LHSPR                                                                                                                                                                                                                                                                                  | 2                               |
| FGF19_HUMAN (O95750) Fibroblast growth factor 19 precursor (FGF-19) [MASS=24002]                                                                                                          | *    | 9.26  | *     | *    | * | 1 | 3 | VC[339]PISSAAPK<br>VEGQSR<br>TVSRVESFEDR<br>GRAVPGLMR                                                                                                                                                                                                                                                | 1<br>1<br>1<br>1                |
| FGF22_HUMAN (Q9HCT0) Fibroblast growth factor 22 precursor (FGF-22) [MASS=19662]                                                                                                          | *    | 13.53 | *     | *    | * | 1 | 2 | LRHLYTSGPHGLSSC[339]FLRIR<br>SVHVGVVVVIKAVSSGFYVAMNRR                                                                                                                                                                                                                                                | 1<br>1                          |

|                                                                                                                                                                                                                      |      |      |      |      |   |   |   |                                                   |   |
|----------------------------------------------------------------------------------------------------------------------------------------------------------------------------------------------------------------------|------|------|------|------|---|---|---|---------------------------------------------------|---|
| FHL2_HUMAN (Q14192) Four and a half LIM domains protein 2 (FHL-2) (Skeletal muscle LIM-protein 3) (SLIM 3) (LIM-domain protein DRAL) [MASS=32196]                                                                    | 0.00 | 2.87 | 0.19 | 0.00 | 1 | 1 | 2 | C[330]SLSLVGR                                     | 5 |
| FIBB_HUMAN (P02675) Fibrinogen beta chain precursor [Contains: Fibrinopeptide B] [MASS=55928]                                                                                                                        | 0.28 | 6.11 | 0.51 | 0.00 | 1 | 2 | 1 | C[330]HAANPNGR                                    | 1 |
|                                                                                                                                                                                                                      |      |      |      |      |   |   | 2 | HGTDDGVVWM[147]NWKGSWYSMRK                        | 1 |
| FKB10_HUMAN (Q96AY3) FK506-binding protein 10 precursor (EC 5.2.1.8) (Peptidyl-prolyl cis-trans isomerase) (PPlase) (Rotamase) (65 kDa FK506-binding protein) (FKBP65) (Immunophilin FKBP65) [MASS=64245]            | 0.00 | 4.98 | 0.48 | 0.00 | 1 | 1 | 3 | NTLVAIVVGVGRLITGM[147]DRGLM[147]GM[147]C[330]VNER | 1 |
| FKBP2_HUMAN (P26885) FK506-binding protein 2 precursor (EC 5.2.1.8) (Peptidyl-prolyl cis-trans isomerase) (PPlase) (Rotamase) (13 kDa FKBP) (FKBP-13) [MASS=15649]                                                   | 0.81 | 5.63 | 1.00 | 0.00 | 1 | 1 | 2 | RVDHC[330]PIK                                     | 1 |
| FLIP1_HUMAN (Q7Z7B0) Filamin-A-interacting protein 1 (FILIP) [MASS=138108]                                                                                                                                           | 0.00 | 2.31 | 0.41 | 0.00 | 1 | 2 | 2 | GEC[330]GNSSLMAEVENLR                             | 1 |
|                                                                                                                                                                                                                      |      |      |      |      |   |   | 2 | KLLEQEKAYQAR                                      | 1 |
| FLNC_HUMAN (Q14315) Filamin-C (Gamma-filamin) (Filamin-2) (Protein FLNc) (Actin-binding-like protein) (ABP-L) (ABP-280-like protein) [MASS=290957]                                                                   | *    | 6.09 | *    | *    | * | 7 | 3 | VTVLFAGQNIERSPFVNVGM[147]ALGDANKVSAR              | 1 |
|                                                                                                                                                                                                                      |      |      |      |      |   |   | 2 | SPFPVHVSEAC[330]NPNAC[330]RASGR                   | 1 |
|                                                                                                                                                                                                                      |      |      |      |      |   |   | 2 | VRASGPGLERGK                                      | 1 |
|                                                                                                                                                                                                                      |      |      |      |      |   |   | 3 | YVVTITWGGYAI PRSPFEVQVSPEAGVQK                    | 1 |
|                                                                                                                                                                                                                      |      |      |      |      |   |   | 3 | YTIM[147]VLFANQEIPASPFHIK                         | 1 |
|                                                                                                                                                                                                                      |      |      |      |      |   |   | 3 | PIPC[339]KLEPGGGAEQAQAVRYM[147]PPEEGPYK           | 1 |
|                                                                                                                                                                                                                      |      |      |      |      |   |   | 3 | SPFVVNVAPPLDLSKIKVQGLNSK                          | 1 |
| FOLC_HUMAN (Q05932) Folylpolyglutamate synthase, mitochondrial precursor (EC 6.3.2.17) (Folylpoly-gamma-glutamate synthetase) (FPGS) (Tetrahydrofolate synthase) (Tetrahydrofolypolyglutamate synthase) [MASS=64609] | *    | 1.19 | *    | *    | * | 1 | 1 | DPAALLK                                           | 2 |

|                                                                                                                                                                                                                                                  |                                   |      |      |      |   |   |   |                                      |   |
|--------------------------------------------------------------------------------------------------------------------------------------------------------------------------------------------------------------------------------------------------|-----------------------------------|------|------|------|---|---|---|--------------------------------------|---|
| FRAP_HUMAN (P42345) FKBP12-rapamycin complex-associated protein (FK506-binding protein 12-rapamycin complex-associated protein 1) (Rapamycin target protein) (RAPT1) (Mammalian target of rapamycin) (mTOR) [MASS=288890]                        | 0.00                              | 6.94 | 0.51 | 0.00 | 1 | 9 | 3 | QLPQLTSLELQYVSPKLLM[147]C[330]R      | 1 |
|                                                                                                                                                                                                                                                  |                                   |      |      |      |   |   | 3 | AIGRLAMAGDTFTAIEYVEFEVK              | 1 |
|                                                                                                                                                                                                                                                  |                                   |      |      |      |   |   | 3 | AYGAM[147]VSC[330]HM[147]LSELEEVIQYK | 1 |
|                                                                                                                                                                                                                                                  |                                   |      |      |      |   |   | 1 | YMKSGNVK                             | 1 |
|                                                                                                                                                                                                                                                  |                                   |      |      |      |   |   | 2 | TAAFQALGLLSVAVR                      | 1 |
|                                                                                                                                                                                                                                                  |                                   |      |      |      |   |   | 2 | M[147]LGHLVSNAPRLIRPYMEPIK           | 1 |
|                                                                                                                                                                                                                                                  |                                   |      |      |      |   |   | 2 | M[147]DTNKDDPELMLGRMR                | 1 |
|                                                                                                                                                                                                                                                  |                                   |      |      |      |   |   | 3 | TDSYSAGQSVEILDGVELGEPAHKK            | 1 |
| 2                                                                                                                                                                                                                                                | MLTNAMEVTGLDGNRYRITC[339]HTVMEVLR | 1    |      |      |   |   |   |                                      |   |
| FREM1_HUMAN (Q5H8C1) FRAS1-related extracellular matrix protein 1 precursor (Protein QBRICK) [MASS=244122]                                                                                                                                       | 0.00                              | 1.61 | 0.40 | 0.00 | 1 | 2 | 2 | YVHNGC[330]PILDEDTVK                 | 1 |
|                                                                                                                                                                                                                                                  |                                   |      |      |      |   |   | 2 | DLSDMQIAYQPPNSSHSERR                 | 1 |
| FRS3_HUMAN (O43559) Fibroblast growth factor receptor substrate 3 (FGFR substrate 3) (Suc1-associated neurotrophic factor target 2) (SNT-2) (FGFR signaling adaptor SNT2) [MASS=54330]                                                           | *                                 | 3.05 | *    | *    | * | 1 | 2 | VFNFDFRRPGPEPPR                      | 1 |
| FXL13_HUMAN (Q8NEE6) F-box/LRR-repeat protein 13 (F-box and leucine-rich repeat protein 13) [MASS=83941]                                                                                                                                         | 0.00                              | 2.86 | 1.10 | 0.00 | 1 | 1 | 2 | QFLDGPASM[147]RIRELNLSNC[339]VR      | 1 |
| FXL16_HUMAN (Q8N461) F-box/LRR-repeat protein 16 (F-box and leucine-rich repeat protein 16) [MASS=51641]                                                                                                                                         | 0.00                              | 4.38 | *    | *    | * | 1 | 3 | ITDTGLSYLSTMSLSRSLYLR                | 1 |
| FXL18_HUMAN (Q96ME1) F-box/LRR-repeat protein 18 (F-box and leucine-rich repeat protein 18) [MASS=88341]                                                                                                                                         | 0.00                              | 5.71 | 1.04 | 0.00 | 1 | 2 | 3 | DLRSLASLNLSGC[339]VHC[339]LSPDSLLRK  | 1 |
|                                                                                                                                                                                                                                                  |                                   |      |      |      |   |   | 2 | LC[339]LVSRSGTLQPDVAVLAFMAR          | 1 |
| FXVD6_HUMAN (Q9H0Q3) FXVD domain-containing ion transport regulator 6 precursor [MASS=10542]                                                                                                                                                     | 0.73                              | 8.42 | 0.92 | 0.00 | 1 | 1 | 2 | C[339]SFNQKPR                        | 1 |
|                                                                                                                                                                                                                                                  |                                   |      |      |      |   |   | 2 | C[330]SFNQKPR                        | 1 |
| FYV1_HUMAN (Q9Y2I7) FYVE finger-containing phosphoinositide kinase (EC 2.7.1.68) (1-phosphatidylinositol-4-phosphate 5-kinase) (Phosphatidylinositol-3-phosphate 5-kinase type III) (PIP5K) (PtdIns(4)P-5-kinase) (PIKfyve) (p235) [MASS=237107] | 0.00                              | 5.58 | 9.10 | 0.00 | 1 | 7 | 3 | NALEELSKATQWNSAEGLPTNSTSDSR          | 1 |
|                                                                                                                                                                                                                                                  |                                   |      |      |      |   |   | 2 | FM[147]GYTGDLRAC[330]TYC[339]R       | 1 |
|                                                                                                                                                                                                                                                  |                                   |      |      |      |   |   | 3 | KIC[339]HHSSGMEFQDHR                 | 1 |
|                                                                                                                                                                                                                                                  |                                   |      |      |      |   |   | 3 | QYWMPDSQC[330]KEC[330]YDC[330]SEK    | 1 |
|                                                                                                                                                                                                                                                  |                                   |      |      |      |   |   | 2 | ISRM[147]TQGDLMV[147]SMDQLLTK        | 1 |
|                                                                                                                                                                                                                                                  |                                   |      |      |      |   |   | 3 | FMGYTGDLRAC[339]TYC[339]RK           | 1 |
| 2                                                                                                                                                                                                                                                | EM[147]ENRR                       | 1    |      |      |   |   |   |                                      |   |
| G109A_HUMAN (Q8TDS4) Nicotinic acid receptor 1 (G-protein coupled receptor 109A) (G-protein coupled receptor HM74A) [MASS=41849]                                                                                                                 | *                                 | 7.16 | *    | *    | * | 1 | 3 | RAITFIM[147]VVAIVVIC[330]FLPSVVVRIR  | 1 |



|                                                                                                                                                                                                                                                                             |      |       |      |      |   |   |   |                                |   |
|-----------------------------------------------------------------------------------------------------------------------------------------------------------------------------------------------------------------------------------------------------------------------------|------|-------|------|------|---|---|---|--------------------------------|---|
| G109B_HUMAN (P49019) Nicotinic acid receptor 2 (G-protein coupled receptor 109B) (G-protein coupled receptor HM74) (G-protein coupled receptor HM74B) [MASS=44495]                                                                                                          | 0.00 | 3.10  | 0.77 | 0.00 | 1 | 1 | 2 | GHC[330]HQEPASLEK              | 1 |
|                                                                                                                                                                                                                                                                             |      |       |      |      |   |   | 2 | VPTANVSVVLDLTC[330]R           | 1 |
|                                                                                                                                                                                                                                                                             |      |       |      |      |   |   | 2 | IISNASC[330]TTNC[330]LAPLAK    | 2 |
| G3P_HUMAN (P04406) Glyceraldehyde-3-phosphate dehydrogenase (EC 1.2.1.12) (GAPDH) [MASS=35922]                                                                                                                                                                              | 1.00 | 9.28  | 0.72 | 0.10 | 6 | 2 | 1 | VPTANVSVVLDLTC[330]R           | 1 |
|                                                                                                                                                                                                                                                                             |      |       |      |      |   |   | 2 | VPTANVSVVLDLTC[339]R           | 1 |
|                                                                                                                                                                                                                                                                             |      |       |      |      |   |   | 2 | IISNASC[339]TTNC[339]LAPLAK    | 1 |
| GABT_HUMAN (P80404) 4-aminobutyrate aminotransferase, mitochondrial precursor (EC 2.6.1.19) ((S)-3-amino-2-methylpropionate transaminase) (EC 2.6.1.22) (Gamma-amino-N-butyrate transaminase) (GABA transaminase) (GABA aminotransferase) (GABA-AT) (GABA-T) ( [MASS=56439] | 1.00 | 10.00 | 0.89 | 0.36 | 6 | 3 | 2 | TM[147]GC[330]LATTHSK          | 1 |
|                                                                                                                                                                                                                                                                             |      |       |      |      |   |   | 2 | HGC[330]AFLVDEVQTGGGC[330]TGK  | 1 |
|                                                                                                                                                                                                                                                                             |      |       |      |      |   |   | 2 | KHGC[339]AFLVDEVQTGGGC[339]TGK | 1 |
|                                                                                                                                                                                                                                                                             |      |       |      |      |   |   | 2 | KHGC[330]AFLVDEVQTGGGC[330]TGK | 1 |
|                                                                                                                                                                                                                                                                             |      |       |      |      |   |   | 2 | TM[147]GC[339]LATTHSK          | 1 |
|                                                                                                                                                                                                                                                                             |      |       |      |      |   |   | 2 | HGC[339]AFLVDEVQTGGGC[339]TGK  | 1 |
| GAH2_HUMAN (P63118) HERV-H_3q26 provirus ancestral Gag polyprotein (Gag polyprotein) [MASS=23279]                                                                                                                                                                           | *    | 11.21 | *    | *    | * | 2 | 3 | C[330]LIFFC[330]NTAWPQYK       | 1 |
|                                                                                                                                                                                                                                                                             |      |       |      |      |   |   | 1 | KVAGAKGIVK                     | 1 |
| GATM_HUMAN (P50440) Glycine amidinotransferase, mitochondrial precursor (EC 2.1.4.1) (L-arginine:glycine amidinotransferase) (Transamidinase) (AT) [MASS=48455]                                                                                                             | 0.89 | 3.55  | 1.82 | 0.00 | 1 | 1 | 2 | NSC[339]AADDKATEPLPK           | 1 |

|                                                                                                                                                        |      |       |      |      |    |   |   |                                                |                                    |   |
|--------------------------------------------------------------------------------------------------------------------------------------------------------|------|-------|------|------|----|---|---|------------------------------------------------|------------------------------------|---|
|                                                                                                                                                        |      |       |      |      |    |   |   | 2                                              | LFVSGAC[330]DASAK                  | 1 |
|                                                                                                                                                        |      |       |      |      |    |   |   | 2                                              | ADQELM[147]TYSHDNIIC[330]GITSVSFSK | 1 |
|                                                                                                                                                        |      |       |      |      |    |   |   | 2                                              | LFVSGAC[339]DASAK                  | 1 |
|                                                                                                                                                        |      |       |      |      |    |   |   | 2                                              | ELAGHTGYLSC[339]C[339]R            | 1 |
|                                                                                                                                                        |      |       |      |      |    |   |   | 2                                              | ELAGHTGYLSC[330]C[330]R            | 5 |
| GBB1_HUMAN (P62873) Guanine nucleotide-binding protein G(I)/G(S)/G(T) subunit beta 1 (Transducin beta chain 1) [MASS=37246]                            | 1.00 | 35.40 | 0.58 | 0.15 | 20 | 6 | 3 | QTFTGHESDINAIC[330]FFPNGNAFATGSDDATC[330]R     | 2                                  |   |
|                                                                                                                                                        |      |       |      |      |    |   | 3 | ADQELM[147]TYSHDNIIC[330]GITSVSFSK             | 1                                  |   |
|                                                                                                                                                        |      |       |      |      |    |   | 2 | AC[330]ADATLSQITNNIDPVGR                       | 1                                  |   |
|                                                                                                                                                        |      |       |      |      |    |   | 3 | QTFTGHESDINAIC[339]FFPNGNAFATGSDDATC[339]R     | 2                                  |   |
|                                                                                                                                                        |      |       |      |      |    |   | 1 | ELAGHTGYLSC[330]C[330]R                        | 1                                  |   |
|                                                                                                                                                        |      |       |      |      |    |   | 1 | LFVSGAC[330]DASAK                              | 3                                  |   |
|                                                                                                                                                        |      |       |      |      |    |   | 2 | KAC[330]ADATLSQITNNIDPVGR                      | 1                                  |   |
|                                                                                                                                                        |      |       |      |      |    |   | 2 | KAC[339]ADATLSQITNNIDPVGR                      | 1                                  |   |
| GBB2_HUMAN (P62879) Guanine nucleotide-binding protein G(I)/G(S)/G(T) subunit beta 2 (Transducin beta chain 2) (G protein beta 2 subunit) [MASS=37200] | 0.99 | 3.83  | 0.63 | 0.08 | 4  | 1 | 2 | ELPGHTGYLSC[339]C[339]R                        | 1                                  |   |
|                                                                                                                                                        |      |       |      |      |    |   | 2 | ELPGHTGYLSC[330]C[330]R                        | 3                                  |   |
| GBB3_HUMAN (P16520) Guanine nucleotide-binding protein G(I)/G(S)/G(T) subunit beta 3 (Transducin beta chain 3) [MASS=37221]                            | 0.81 | 11.18 | 1.81 | 0.00 | 1  | 2 | 3 | AC[339]ADVTLAELVSGLEVGRVQMRTR                  | 1                                  |   |
|                                                                                                                                                        |      |       |      |      |    |   | 2 | ELSAHTGYLSC[330]C[330]R                        | 1                                  |   |
| GBG12_HUMAN (Q9UBI6) Guanine nucleotide-binding protein G(I)/G(S)/G(O) gamma-12 subunit precursor [MASS=7875]                                          | 1.00 | 19.72 | 0.76 | 0.07 | 2  | 1 | 2 | ASADLM[147]SYC[330]EEHAR                       | 1                                  |   |
|                                                                                                                                                        |      |       |      |      |    |   | 2 | ASADLMSYC[330]EEHAR                            | 1                                  |   |
| GBG2_HUMAN (P59768) Guanine nucleotide-binding protein G(I)/G(S)/G(O) gamma-2 subunit precursor (G gamma-1) [MASS=7719]                                | 1.00 | 62.86 | 0.61 | 0.01 | 3  | 2 | 2 | AAADLM[147]AYC[339]EAHAK                       | 1                                  |   |
|                                                                                                                                                        |      |       |      |      |    |   | 3 | AAADLM[147]AYC[330]EAHAKEDPLLTPVASENPFR        | 1                                  |   |
|                                                                                                                                                        |      |       |      |      |    |   | 2 | AAADLM[147]AYC[330]EAHAK                       | 1                                  |   |
| GBG3_HUMAN (P63215) Guanine nucleotide-binding protein G(I)/G(S)/G(O) gamma-3 subunit precursor [MASS=8305]                                            | 1.00 | 40.00 | 0.60 | 0.03 | 2  | 1 | 3 | AAADLM[147]TYC[339]DAHAC[339]EDPLITPVPTSENPFRR | 1                                  |   |
|                                                                                                                                                        |      |       |      |      |    |   | 3 | AAADLM[147]TYC[330]DAHAC[330]EDPLITPVPTSENPFRR | 1                                  |   |

|                                                                                                                                                                                                                                                    |      |       |      |      |   |   |   |                                     |    |
|----------------------------------------------------------------------------------------------------------------------------------------------------------------------------------------------------------------------------------------------------|------|-------|------|------|---|---|---|-------------------------------------|----|
| GBG7_HUMAN (O60262) Guanine nucleotide-binding protein G(I)/G(S)/G(O) gamma-7 subunit precursor [MASS=7522]                                                                                                                                        | 0.98 | 20.59 | 0.54 | 0.00 | 1 | 1 | 2 | AASDLM[147]SYC[330]EQHAR            | 1  |
| GBLP_HUMAN (P63244) Guanine nucleotide-binding protein subunit beta 2-like 1 (Guanine nucleotide-binding protein subunit beta-like protein 12.3) (Receptor of activated protein kinase C 1) (RACK1) (Receptor for activated C kinase) [MASS=34945] | 0.60 | 8.54  | 0.74 | 0.00 | 1 | 1 | 3 | TNHIGHTGYLNTVTVSPDGLC[339]ASGGK     | 1  |
| GBP4_HUMAN (Q96PP9) Guanylate-binding protein 4 [MASS=73123]                                                                                                                                                                                       | 0.00 | 4.69  | 0.69 | 0.00 | 1 | 1 | 3 | LPTDTLQELLDVHAAC[330]EREAIAVFMEHSFK | 1  |
| GCF_HUMAN (P16383) GC-rich sequence DNA-binding factor (GCF) (Transcription factor 9) (TCF-9) [MASS=91001]                                                                                                                                         | 0.00 | 2.42  | 4.40 | 0.00 | 1 | 1 | 3 | LPARTKAQNPEPLM[147]C[330]PQM[147]K  | 1  |
| GCM2_HUMAN (O75603) Chorion-specific transcription factor GCMb (Glial cells missing homolog 2) (GCM motif protein 2) (hGCMb) [MASS=56609]                                                                                                          | *    | 1.78  | *    | *    | * | 1 | 2 | IAGDC[339]RAIR                      | 2  |
|                                                                                                                                                                                                                                                    |      |       |      |      |   |   | 2 | YVSAQPLAGR                          | 18 |
| GCP2_HUMAN (Q9BSJ2) Gamma-tubulin complex component 2 (GCP-2) (Spindle pole body protein Spc97 homolog) (hSpc97) (hGCP2) (h103p) [MASS=102533]                                                                                                     | *    | 3.10  | *    | *    | * | 2 |   |                                     |    |
|                                                                                                                                                                                                                                                    |      |       |      |      |   |   | 2 | VHGGDGAEVYIDLLQKNR                  | 1  |
| GCP_HUMAN (Q9NPF4) Probable O-sialoglycoprotein endopeptidase (EC 3.4.24.57) (hOSGEP) [MASS=36427]                                                                                                                                                 | 0.00 | 5.37  | 0.15 | 0.00 | 1 | 1 | 3 | FC[330]IDNGAM[147]IAQAGWEM[147]FR   | 1  |

|                                                                                                                                                      |      |       |      |      |    |   |   |                                        |   |
|------------------------------------------------------------------------------------------------------------------------------------------------------|------|-------|------|------|----|---|---|----------------------------------------|---|
| GCST_HUMAN (P48728)<br>Aminomethyltransferase, mitochondrial precursor (EC 2.1.2.10) (Glycine cleavage system T protein) (GCVT) [MASS=43946]         | *    | 5.71  | *    | *    | *  | 1 | 2 | NVAM[147]GYVPC[339]EYSRPGTMLLVEVR      | 1 |
| GEPH_HUMAN (Q9NQX3) Gephyrin [MASS=79748]                                                                                                            | 0.00 | 7.34  | 1.28 | 0.00 | 1  | 2 | 3 | FPVVAVM[147]STGNELLNPEDDLLPGK          | 1 |
| GFI1_HUMAN (Q99684) Zinc finger protein Gfi-1 (Growth factor independence 1) [MASS=45297]                                                            | 0.00 | 11.14 | 1.30 | 0.00 | 1  | 2 | 3 | EAPGMALAMLMGSLNVTPLGMLSRPVC[339]GIR    | 1 |
|                                                                                                                                                      |      |       |      |      |    |   | 2 | SM[147]C[339]PSLDEAQPFLPFKPYSWGLAGSDLR | 1 |
|                                                                                                                                                      |      |       |      |      |    |   | 2 | AHSYHQPRSPGPDYSLR                      | 1 |
|                                                                                                                                                      |      |       |      |      |    |   | 3 | LINGGIAGLIGVTC[339]VFPIDLAK            | 1 |
|                                                                                                                                                      |      |       |      |      |    |   | 2 | LINGGIAGLIGVTC[339]VFPIDLAK            | 2 |
| GHC1_HUMAN (Q9H936) Mitochondrial glutamate carrier 1 (GC-1) (Glutamate/H(+) symporter 1) (Solute carrier family 25 member 22) [MASS=34470]          | 1.00 | 11.46 | 1.30 | 0.08 | 7  | 2 | 2 | GVNEDTYSGILDC[339]AR                   | 1 |
|                                                                                                                                                      |      |       |      |      |    |   | 2 | GVNEDTYSGILDC[330]AR                   | 2 |
|                                                                                                                                                      |      |       |      |      |    |   | 2 | LINGGIAGLIGVTC[330]VFPIDLAK            | 1 |
| GLPK3_HUMAN (Q14409) Glycerol kinase, testis specific 1 (EC 2.7.1.30) (ATP:glycerol 3-phosphotransferase) (Glycerokinase) (GK) [MASS=60569]          | *    | 3.44  | *    | *    | *  | 1 | 3 | FEPQINAESEIRYSTWKK                     | 1 |
| GLRB_HUMAN (P48167) Glycine receptor beta chain precursor (Glycine receptor 58 kDa subunit) [MASS=56122]                                             | *    | 2.82  | *    | *    | *  | 1 | 3 | LLVSYDPRIRPNFK                         | 1 |
| GLRX1_HUMAN (P35754) Glutaredoxin-1 (Thioltransferase-1) (TTase-1) [MASS=11644]                                                                      | 0.00 | 44.76 | 1.77 | 0.00 | 1  | 2 | 3 | VFIGKDC[330]IGGC[339]SDLVSLQQSGELLTR   | 1 |
|                                                                                                                                                      |      |       |      |      |    |   | 3 | DC[339]IGGC[339]SDLVSLQQSGELLTR        | 1 |
|                                                                                                                                                      |      |       |      |      |    |   | 3 | LKEC[330]M[147]DM[147]LR               | 1 |
|                                                                                                                                                      |      |       |      |      |    |   | 2 | C[339]VQSNIVLLTQAFR                    | 3 |
| GLSK_HUMAN (O94925) Glutaminase kidney isoform, mitochondrial precursor (EC 3.5.1.2) (GLS) (L-glutamine amidohydrolase) (K-glutaminase) [MASS=73461] | 1.00 | 8.52  | 1.83 | 0.01 | 10 | 4 | 2 | LKEC[330]M[147]DM[147]LR               | 1 |
|                                                                                                                                                      |      |       |      |      |    |   | 2 | LKEC[339]M[147]DM[147]LR               | 2 |
|                                                                                                                                                      |      |       |      |      |    |   | 3 | LKEC[339]M[147]DM[147]LR               | 1 |
|                                                                                                                                                      |      |       |      |      |    |   | 2 | C[330]VQSNIVLLTQAFR                    | 3 |
|                                                                                                                                                      |      |       |      |      |    |   | 2 | VPFC[339]LQSC[339]VKPLK                | 1 |
|                                                                                                                                                      |      |       |      |      |    |   | 3 | GIHFC[339]HDLVSLC[339]NFBHNYDNL        | 1 |

|                                                                                                                                                     |      |       |      |      |   |   |   |                                          |               |   |
|-----------------------------------------------------------------------------------------------------------------------------------------------------|------|-------|------|------|---|---|---|------------------------------------------|---------------|---|
| GLSL_HUMAN (Q9UI32) Glutaminase liver isoform, mitochondrial precursor (EC 3.5.1.2) (GLS) (L-glutamine amidohydrolase) (L-glutaminase) [MASS=66309] | *    | 1.16  | *    | *    | * | 1 | 1 | 1                                        | FLIEAC[339]JK | 1 |
| GMCLL_HUMAN (Q8NEA9) Germ cell-less protein-like 1-like [MASS=60201]                                                                                | 0.39 | 7.60  | 1.79 | 0.00 | 1 | 2 | 2 | VVAILAAAC[339]MLQLDGLIQQC[339]GETM[147]K | 1             |   |
|                                                                                                                                                     |      |       |      |      |   |   | 2 | KDFEGMAFLETEPGK                          | 1             |   |
| GNAI1_HUMAN (P63096) Guanine nucleotide-binding protein G(i), alpha-1 subunit (Adenylate cyclase-inhibiting G alpha protein) [MASS=40230]           | 1.00 | 11.90 | 0.59 | 0.07 | 2 | 3 | 2 | IIHEAGYSEEEC[330]KQYK                    | 1             |   |
|                                                                                                                                                     |      |       |      |      |   |   | 2 | EIYTHFTC[330]ATDTK                       | 1             |   |
|                                                                                                                                                     |      |       |      |      |   |   | 2 | EIYTHFTC[339]ATDTK                       | 1             |   |
|                                                                                                                                                     |      |       |      |      |   |   | 2 | IIHEAGYSEEEC[330]K                       | 1             |   |
| GNAI2_HUMAN (P04899) Guanine nucleotide-binding protein G(i), alpha-2 subunit (Adenylate cyclase-inhibiting G alpha protein) [MASS=40319]           | 1.00 | 3.67  | 0.51 | 0.00 | 1 | 1 | 2 | IIHEDGYSEEEC[330]R                       | 1             |   |
| GNAI3_HUMAN                                                                                                                                         | 0.00 | 7.93  | *    | *    | * | 1 | 2 | ADDARQLFVLAGSAEEGVM[147]TPELAGVIK        | 1             |   |
|                                                                                                                                                     |      |       |      |      |   |   | 2 | SPLTIC[330]FPEYTGPNYEDAAAYIQAQFESK       | 2             |   |
|                                                                                                                                                     |      |       |      |      |   |   | 3 | KSPLTIC[339]FPEYTGPNYEDAAAYIQAQFESK      | 1             |   |
|                                                                                                                                                     |      |       |      |      |   |   | 3 | MHESLM[147]LFDSIC[339]NNKFFIDTSIILFLNKK  | 1             |   |
|                                                                                                                                                     |      |       |      |      |   |   | 3 | KADAKMVC[339]DVVSR                       | 1             |   |
|                                                                                                                                                     |      |       |      |      |   |   | 2 | M[147]VC[339]DVVSR                       | 1             |   |
| GNAO1_HUMAN (P09471) Guanine nucleotide-binding protein G(o) subunit alpha 1 [MASS=39919]                                                           | 1.00 | 35.69 | 0.49 | 0.16 | 8 | 6 | 2 | MVC[330]DVVSR                            | 1             |   |
|                                                                                                                                                     |      |       |      |      |   |   | 3 | KSPLTIC[330]FPEYTGPNYEDAAAYIQAQFESK      | 2             |   |
|                                                                                                                                                     |      |       |      |      |   |   | 1 | M[147]VC[330]DVVSR                       | 2             |   |
|                                                                                                                                                     |      |       |      |      |   |   | 3 | SPLTIC[330]FPEYTGPNYEDAAAYIQAQFESK       | 2             |   |
|                                                                                                                                                     |      |       |      |      |   |   | 2 | M[147]HESLM[147]LFDSIC[330]NNK           | 1             |   |
|                                                                                                                                                     |      |       |      |      |   |   | 2 | EIYTHVTC[330]ATDTNNIQVFDAVTDVIAK         | 1             |   |
| GNAO2_HUMAN (P29777) Guanine nucleotide-binding protein G(o) subunit alpha 2 [MASS=39955]                                                           | 1.00 | 16.71 | 1.16 | 0.22 | 2 | 2 | 3 | EIYTHVTC[339]ATDTNNIQVFDAVTDVIAK         | 1             |   |
|                                                                                                                                                     |      |       |      |      |   |   | 3 | SPLTIC[330]FPEYTGPSAFTEAVAYIQAQYESK      | 1             |   |
|                                                                                                                                                     |      |       |      |      |   |   | 3 | SNEYQLIDC[330]AQYFLDKIDVIK               | 1             |   |
| GNAS_HUMAN (P63092) Guanine nucleotide-binding protein G(s) subunit alpha (Adenylate cyclase-stimulating G alpha protein) [MASS=45664]              | 0.95 | 8.63  | 0.69 | 0.00 | 1 | 2 | 2 | QADYVPSDQDLLR                            | 2             |   |
|                                                                                                                                                     |      |       |      |      |   |   | 2 | IPLTIC[330]FPEYK                         | 1             |   |
| GNAZ_HUMAN (P19086) Guanine nucleotide-binding protein G(z) subunit alpha (G(x) alpha chain) (Gz-alpha) [MASS=40792]                                | 0.97 | 3.11  | 0.74 | 0.00 | 1 | 1 | 2 | IPLTIC[330]FPEYK                         | 1             |   |

|                                                                                                                                                                                  |      |       |      |      |   |    |   |                                            |   |
|----------------------------------------------------------------------------------------------------------------------------------------------------------------------------------|------|-------|------|------|---|----|---|--------------------------------------------|---|
| GNRP_HUMAN (Q13972) Guanine nucleotide-releasing protein (GNRP) (Ras-specific nucleotide exchange factor CDC25) (Ras-specific guanine nucleotide-releasing factor) [MASS=145382] | *    | 7.14  | *    | *    | * | 5  | 2 | TM[147]NSC[339]KVLQIR                      | 2 |
|                                                                                                                                                                                  |      |       |      |      |   |    | 2 | AEPFENHSALEIAEQLTLLDHLVFK                  | 1 |
|                                                                                                                                                                                  |      |       |      |      |   |    | 2 | SPTTPKSVKNK                                | 1 |
|                                                                                                                                                                                  |      |       |      |      |   |    | 2 | DNERIQSTQTVAPNDEDSDIKK                     | 1 |
|                                                                                                                                                                                  |      |       |      |      |   |    | 3 | C[330]LHNYNAVLEITSSMNRSAIFR                | 1 |
| GGOB1_HUMAN (Q14789) Golgin subfamily B member 1 (Giantin) (Macrogolgin) (372 kDa Golgi complex-associated protein) (GCP372) [MASS=376075]                                       | *    | 6.23  | *    | *    | * | 10 | 3 | HKELSVLLEEM[147]KEAQEEIAFLK                | 1 |
|                                                                                                                                                                                  |      |       |      |      |   |    | 2 | DLEITKENLAQAVEHR                           | 1 |
|                                                                                                                                                                                  |      |       |      |      |   |    | 3 | AQTEVQLQQKVC[339]DTLQGENKELLSQLEETR        | 1 |
|                                                                                                                                                                                  |      |       |      |      |   |    | 2 | LPSTDQQESC[339]SSTPGLEEPLFK                | 1 |
|                                                                                                                                                                                  |      |       |      |      |   |    | 2 | NM[147]QEKLDAALRR                          | 1 |
|                                                                                                                                                                                  |      |       |      |      |   |    | 3 | ELENLLSQEEEEENIVLEENK                      | 1 |
|                                                                                                                                                                                  |      |       |      |      |   |    | 3 | QM[147]SIHM[147]EELKINISR                  | 1 |
|                                                                                                                                                                                  |      |       |      |      |   |    | 2 | QM[147]SIHMEELKINISRLEHDK                  | 1 |
|                                                                                                                                                                                  |      |       |      |      |   |    | 2 | SEEGKQRSAAQPSTSPAEVQSLK                    | 1 |
|                                                                                                                                                                                  |      |       |      |      |   |    | 2 | LITEM[147]DRSLLNQSLSSSC[330]ESLK           | 1 |
| GOR_HUMAN (Q8IX06) Exonuclease GOR (EC 3.1.-.-) (Antigen GOR) (RNA exonuclease 1 homolog-like) [MASS=35139]                                                                      | *    | 4.09  | *    | *    | * | 1  | 2 | KESLDGFVETFKK                              | 1 |
| GP113_HUMAN (Q8IZF5) Probable G-protein coupled receptor 113 precursor (G-protein coupled receptor PGR23) [MASS=116340]                                                          | 0.00 | 1.76  | 0.97 | 0.00 | 1 | 1  | 2 | LC[330]GADGVWGPVHSSC[330]TDAR              | 1 |
| GP124_HUMAN (Q96PE1) Probable G-protein coupled receptor 124 precursor (Tumor endothelial marker 5) [MASS=141961]                                                                | *    | 1.35  | *    | *    | * | 1  | 2 | YDDVTLM[147]GAEVASGGC[330]M[147]K          | 1 |
| GP162_HUMAN (Q16538) Probable G-protein coupled receptor 162 (Gene-rich cluster gene A protein) [MASS=63930]                                                                     | 0.00 | 8.16  | 4.10 | 0.00 | 1 | 2  | 3 | TVWEQC[339]VAIM[147]SEEDGDDGGC[339]DDYAEGR | 1 |
|                                                                                                                                                                                  |      |       |      |      |   |    | 2 | DPAQVKLLPGRHMLFPPLER                       | 1 |
|                                                                                                                                                                                  |      |       |      |      |   |    | 2 | C[339]KDVLTGQEFDVR                         | 2 |
| GPDM_HUMAN (P43304) Glycerol-3-phosphate dehydrogenase, mitochondrial precursor (EC 1.1.99.5) (GPD-M) (GPDH-M) (mtGPD) [MASS=80833]                                              | 1.00 | 12.24 | 1.50 | 0.03 | 4 | 5  | 2 | TAEENLDRRVPIPVDR                           | 1 |
|                                                                                                                                                                                  |      |       |      |      |   |    | 3 | AVKGTILVGGGALATVLGLSQFAHYRR                | 1 |
|                                                                                                                                                                                  |      |       |      |      |   |    | 2 | C[339]VINATGPFTDSVRKMDDK                   | 1 |
|                                                                                                                                                                                  |      |       |      |      |   |    | 2 | C[330]VINATGPFTDSVR                        | 1 |
|                                                                                                                                                                                  |      |       |      |      |   |    | 2 | C[339]VINATGPFTDSVR                        | 1 |

|                                                                                                                                                                  |      |      |      |      |   |   |   |                                   |   |
|------------------------------------------------------------------------------------------------------------------------------------------------------------------|------|------|------|------|---|---|---|-----------------------------------|---|
| GPM6A_HUMAN (P51674) Neuronal membrane glycoprotein M6-a (M6a) [MASS=31209]                                                                                      | 1.00 | 9.71 | 0.48 | 0.11 | 5 | 3 | 2 | KIC[339]TVSENFLR                  | 1 |
|                                                                                                                                                                  |      |      |      |      |   |   | 2 | KIC[330]TVSENFLR                  | 1 |
|                                                                                                                                                                  |      |      |      |      |   |   | 2 | IC[330]TVSENFLR                   | 2 |
| GPM6B_HUMAN (Q13491) Neuronal membrane glycoprotein M6-b (M6b) [MASS=28989]                                                                                      | *    | 3.40 | *    | *    | * | 1 | 2 | ITTC[330]GR                       | 1 |
|                                                                                                                                                                  |      |      |      |      |   |   | 2 | SREDC[330]C[330]TKF               | 2 |
|                                                                                                                                                                  |      |      |      |      |   |   | 3 | QDVHSRGLC[339]S                   | 2 |
| GPVI_HUMAN (Q9HCN6) Platelet glycoprotein VI precursor [MASS=36923]                                                                                              | 0.00 | 7.08 | 3.20 | 0.00 | 1 | 2 | 3 | C[339]QGPPGVDLYRLEK               | 3 |
| GRASP_HUMAN (Q7Z6J2) General receptor for phosphoinositides 1-associated scaffold protein (GRP1-associated scaffold protein) [MASS=42623]                        | 0.00 | 5.32 | 0.37 | 0.00 | 1 | 1 | 2 | C[330]AGPGGGGGGAPGALWTEAR         | 1 |
| GRIA4_HUMAN (P48058) Glutamate receptor 4 precursor (GluR-4) (GluR4) (Glutamate receptor ionotropic, AMPA 4) (AMPA-selective glutamate receptor 4) [MASS=100809] | *    | 3.88 | *    | *    | * | 2 | 3 | SKIAVYEKM[147]WTYMR               | 1 |
|                                                                                                                                                                  |      |      |      |      |   |   | 3 | IAVYEKM[147]WTYMRSAEPSVFTR        | 1 |
|                                                                                                                                                                  |      |      |      |      |   |   |   |                                   |   |
| GRIK4_HUMAN (Q16099) Glutamate receptor, ionotropic kainate 4 precursor (Glutamate receptor KA-1) (KA1) (Excitatory amino acid receptor 1) (EAA1) [MASS=107229]  | 0.00 | 2.93 | *    | *    | * | 1 | 3 | AKVEVDIFELLRDSEYETAETMC[330]QILPK | 1 |
| GRIK5_HUMAN (Q16478) Glutamate receptor, ionotropic kainate 5 precursor (Glutamate receptor KA-2) (KA2) (Excitatory amino acid receptor 2) (EAA2) [MASS=109047]  | *    | 2.65 | *    | *    | * | 1 | 2 | LVEDGLYGAPENGSWTGM[147]VGELINR    | 1 |
| GRIPE_HUMAN (Q6GYQ0) GTPase-activating Rap/Ran-GAP domain-like 1 (GAP-related-interacting partner to E12) (GRIPE) (Tuberin-like protein 1) [MASS=229830]         | *    | 0.49 | *    | *    | * | 1 | 2 | SFHLLKNEK                         | 1 |

|                                                                                                                                                                                       |      |       |      |      |   |   |   |                                            |   |
|---------------------------------------------------------------------------------------------------------------------------------------------------------------------------------------|------|-------|------|------|---|---|---|--------------------------------------------|---|
| GRLF1_HUMAN (Q9NRY4) Glucocorticoid receptor DNA-binding factor 1 (Glucocorticoid receptor repression factor 1) (GRF-1) (Rho GAP p190A) (p190-A) [MASS=172228]                        | *    | 0.73  | *    | *    | * | 1 | 2 | KNLQVVETSAR                                | 1 |
| GRP75_HUMAN (P38646) Stress-70 protein, mitochondrial precursor (75 kDa glucose-regulated protein) (GRP 75) (Peptide-binding protein 74) (PBP74) (Mortalin) (MOT) [MASS=73680]        | 1.00 | 7.36  | 0.83 | 0.89 | 5 | 5 | 2 | RTIAPC[330]QK                              | 1 |
|                                                                                                                                                                                       |      |       |      |      |   |   | 2 | TIAPC[339]QK                               | 1 |
|                                                                                                                                                                                       |      |       |      |      |   |   | 2 | M[147]EEFKDQLPADEC[339]NK                  | 1 |
|                                                                                                                                                                                       |      |       |      |      |   |   | 2 | SDIGEVILVGGMTR                             | 1 |
|                                                                                                                                                                                       |      |       |      |      |   |   | 2 | M[147]EEFKDQLPADEC[330]NK                  | 1 |
|                                                                                                                                                                                       |      |       |      |      |   |   | 2 | VC[339]QGER                                | 1 |
| GTR11_HUMAN (Q9BYW1) Solute carrier family 2, facilitated glucose transporter member 11 (Glucose transporter type 11) (Glucose transporter type 10) [MASS=53702]                      | 0.00 | 8.67  | 0.73 | 0.00 | 1 | 2 | 3 | YLLIDC[330]GDTEAC[330]LAALRR               | 1 |
|                                                                                                                                                                                       |      |       |      |      |   |   | 2 | IQYAIIGTGSC[330]JELLTAVVSC[339]VVIER       | 1 |
| GUC1A_HUMAN (P43080) Guanylyl cyclase-activating protein 1 (GCAP 1) (Guanylate cyclase activator 1A) [MASS=22788]                                                                     | 0.00 | 11.00 | 5.65 | 0.00 | 1 | 1 | 3 | FM[147]TEC[339]PSGQLTLYEFRQFFGLK           | 1 |
| GUC2D_HUMAN (Q02846) Retinal guanylyl cyclase 1 precursor (EC 4.6.1.2) (Guanylate cyclase 2D, retinal) (RETGC-1) (Rod outer segment membrane guanylate cyclase) (ROSGC) [MASS=120058] | *    | 2.45  | *    | *    | * | 1 | 3 | PLVSM[147]DQAPVEC[330]ILLMKQC[339]WAEQPELR | 1 |
| H33_HUMAN (P84243) Histone H3.3 [MASS=15197]                                                                                                                                          | 0.99 | 23.70 | 0.71 | 0.09 | 2 | 1 | 3 | FQSAAGALQEASEAYLVGLFEDTNLC[339]AIHAK       | 2 |
| HAIP_HUMAN (O60229) Huntingtin-associated protein-interacting protein (Protein Duo) [MASS=192228]                                                                                     | *    | 1.86  | *    | *    | * | 3 | 3 | HFLFEISLVFSK                               | 1 |
|                                                                                                                                                                                       |      |       |      |      |   |   | 2 | ALLDVLQR                                   | 1 |
|                                                                                                                                                                                       |      |       |      |      |   |   | 2 | TPAKQRNNSK                                 | 1 |
|                                                                                                                                                                                       |      |       |      |      |   |   | 3 | GTFATLSELHC[339]DKLHVDPENFR                | 2 |
| HBB_HUMAN (P68871) Hemoglobin subunit beta (Hemoglobin beta chain) (Beta-globin) [MASS=15867]                                                                                         | 1.00 | 15.07 | 0.85 | 0.03 | 5 | 1 | 3 | GTFATLSELHC[330]DKLHVDPENFR                | 2 |
|                                                                                                                                                                                       |      |       |      |      |   |   | 2 | GTFATLSELHC[339]DKLHVDPENFR                | 1 |
| HBP1_HUMAN (O60381) HMG box-containing protein 1 (HMG box transcription factor 1) (High mobility group box transcription factor 1) [MASS=57645]                                       | 0.00 | 4.67  | 1.86 | 0.00 | 1 | 2 | 1 | PPPVSSSSK                                  | 1 |
|                                                                                                                                                                                       |      |       |      |      |   |   | 2 | ASLSC[339]GGPGGQDFAR                       | 1 |



|                                                                                                                                                                                                                                                                              |      |      |      |      |   |   |   |                                              |   |
|------------------------------------------------------------------------------------------------------------------------------------------------------------------------------------------------------------------------------------------------------------------------------|------|------|------|------|---|---|---|----------------------------------------------|---|
| HCDH_HUMAN (Q16836) Short chain 3-hydroxyacyl-CoA dehydrogenase, mitochondrial precursor (EC 1.1.1.35) (HCDH) (Medium and short chain L-3-hydroxyacyl-coenzyme A dehydrogenase) [MASS=34277]                                                                                 | 0.00 | 1.91 | 5.32 | 0.00 | 1 | 1 | 2 | HPVSC[339]K                                  | 1 |
| HCFC1_HUMAN (P51610) Host cell factor (HCF) (HCF-1) (C1 factor) (VP16 accessory protein) (VCAF) (CFF) [Contains: HCF N-terminal chain 1; HCF N-terminal chain 2; HCF N-terminal chain 3; HCF N-terminal chain 4; HCF N-terminal chain 5; HCF N-terminal chain] [MASS=208840] | *    | 1.47 | *    | *    | * | 1 | 2 | QTSATSTMTVM[147]ATGAPC[330]SAGPLLGPMS[147]AR | 1 |
| HCN4_HUMAN (Q9Y3Q4) Potassium/sodium hyperpolarization-activated cyclic nucleotide-gated channel 4 [MASS=129041]                                                                                                                                                             | *    | 2.91 | *    | *    | * | 2 | 3 | QRIHDYYEHRYQGK                               | 2 |
|                                                                                                                                                                                                                                                                              |      |      |      |      |   |   | 3 | TGIVVEDNTEIILDLPQRIKMK                       | 1 |
| HDAC8_HUMAN (Q9BY41) Histone deacetylase 8 (HD8) [MASS=41757]                                                                                                                                                                                                                | 0.00 | 7.43 | 1.02 | 0.00 | 1 | 1 | 2 | AVVLQLGADTIAGDPMC[330]SFNM[147]TPVGIGK       | 2 |
|                                                                                                                                                                                                                                                                              |      |      |      |      |   |   | 2 | VLNNVVIHLLGDEDPRVR                           | 1 |
|                                                                                                                                                                                                                                                                              |      |      |      |      |   |   | 3 | RVHPSEDEILAQYLVPATC[339]KAAAVLGM[147]DK      | 1 |
| HD_HUMAN (P42858) Huntingtin (Huntington disease protein) (HD protein) [MASS=347857]                                                                                                                                                                                         | *    | 4.20 | *    | *    | * | 6 | 3 | FHVGDWMTGIRTTLTGNTFLADC[339]IPLLR            | 1 |
|                                                                                                                                                                                                                                                                              |      |      |      |      |   |   | 2 | VNVHSPHRAM[147]AALGLMLTC[339]MYTGKEK         | 1 |
|                                                                                                                                                                                                                                                                              |      |      |      |      |   |   | 3 | AMAALGLMLTC[339]MYTGKEK                      | 1 |
|                                                                                                                                                                                                                                                                              |      |      |      |      |   |   | 3 | EPGEQASVPLSPK                                | 2 |
| HEAT1_HUMAN (Q9H583) HEAT repeat-containing protein 1 (Protein BAP28) [MASS=242369]                                                                                                                                                                                          | *    | 3.68 | *    | *    | * | 4 | 2 | AEALM[147]M[147]PLVDQLENRLGGEEK              | 1 |
|                                                                                                                                                                                                                                                                              |      |      |      |      |   |   | 3 | YNEFSVSLLNEDPKSLDIFIKAVHTTK                  | 1 |
|                                                                                                                                                                                                                                                                              |      |      |      |      |   |   | 2 | ILAMNHLKK                                    | 1 |
|                                                                                                                                                                                                                                                                              |      |      |      |      |   |   | 3 | NWKNHM[147]GPFM[147]SILQEHIGVMKK             | 1 |
| HEAT3_HUMAN (Q7Z4Q2) HEAT repeat-containing protein 3 [MASS=74582]                                                                                                                                                                                                           | *    | 8.68 | *    | *    | * | 3 | 2 | KIFEKTAFPNSIAVDLC[339]SR                     | 1 |
|                                                                                                                                                                                                                                                                              |      |      |      |      |   |   | 2 | DPSLVVAGEALDALFDVFADGK                       | 1 |
|                                                                                                                                                                                                                                                                              |      |      |      |      |   |   | 3 | ILSEVLGM[147]DAGEMVIQM[147]K                 | 1 |
| HEPH_HUMAN (Q9BQS7) Hephaestin precursor (EC 1.-.-) [MASS=130448]                                                                                                                                                                                                            | *    | 3.45 | *    | *    | * | 2 | 2 | QRYQAAR                                      | 1 |
|                                                                                                                                                                                                                                                                              |      |      |      |      |   |   | 3 | GDTVAVHLLGLGTETDVHGVFMFQGNTVQLQGM[147]R      | 1 |
| HEPS_HUMAN (P05981) Serine protease hepsin (EC 3.4.21.-) (Transmembrane protease, serine 1) [Contains: Serine protease hepsin non-catalytic chain; Serine protease hepsin catalytic chain] [MASS=45011]                                                                      | *    | 4.32 | *    | *    | * | 1 | 3 | LPHTQRLLLEVIVC[330]DC[339]PR                 | 1 |

|                                                                                                                                                                                                                                                                             |      |       |      |      |   |   |        |                                                                               |        |
|-----------------------------------------------------------------------------------------------------------------------------------------------------------------------------------------------------------------------------------------------------------------------------|------|-------|------|------|---|---|--------|-------------------------------------------------------------------------------|--------|
| HEXB_HUMAN (P07686) Beta-hexosaminidase beta chain precursor (EC 3.2.1.52) (N-acetyl-beta-glucosaminidase) (Beta-N-acetylhexosaminidase) (Hexosaminidase B) (Cervical cancer proto-oncogene 7) (HCC-7) [Contains: Beta-hexosaminidase beta-B chain; Beta-hexos [MASS=63111] | *    | 2.16  | *    | *    | * | 1 | 3      | MVIEYARLRGIR                                                                  | 1      |
| HHCM_HUMAN (Q05877) Hepatocellular carcinoma protein HHCM (HHC(M)) [MASS=52150]                                                                                                                                                                                             | 0.00 | 6.64  | 0.34 | 0.00 | 1 | 2 | 2<br>2 | VIIISILQQVMANTLEINGKIR<br>DVRVTC[330]IPK                                      | 1<br>1 |
| HIG2A_HUMAN (Q9BW72) HIG1 domain family member 2A [MASS=11528]                                                                                                                                                                                                              | 1.00 | 23.58 | 1.27 | 0.00 | 2 | 1 | 3<br>3 | ENPVVPIGC[330]LATAAALTYGLYSFHR<br>ENPVVPIGC[339]LATAAALTYGLYSFHR              | 1<br>1 |
| HINT2_HUMAN (Q9BX68) Histidine triad nucleotide-binding protein 2 (EC 3.-.-) (HINT-2) (HINT-3) (HIT-17kDa) (PKCI-1-related HIT protein) [MASS=17162]                                                                                                                        | 0.98 | 10.43 | 1.11 | 0.00 | 1 | 1 | 2      | SLPADILYEDQQC[339]LVFR                                                        | 1      |
| HNRH1_HUMAN (P31943) Heterogeneous nuclear ribonucleoprotein H (hnRNP H) [MASS=49098]                                                                                                                                                                                       | 0.00 | 2.90  | 0.83 | 0.00 | 1 | 1 | 2      | DLNYC[339]FSGM[147]SDHR                                                       | 1      |
| HNRPK_HUMAN (P61978) Heterogeneous nuclear ribonucleoprotein K (hnRNP K) (Transformation up-regulated nuclear protein) (TUNP) [MASS=50976]                                                                                                                                  | *    | 2.16  | *    | *    | * | 1 | 2      | RGPPPPPPGR                                                                    | 1      |
| HOOK2_HUMAN (Q96ED9) Hook homolog 2 (h-hook2) (hHK2) [MASS=83163]                                                                                                                                                                                                           | *    | 4.17  | *    | *    | * | 2 | 2<br>2 | IRHLEMDFEKSR<br>QVQELQGQLQEEAM[147]KAEK                                       | 1<br>1 |
| HS105_HUMAN (Q92598) Heat-shock protein 105 kDa (Heat shock 110 kDa protein) (Antigen NY-CO-25) [MASS=96864]                                                                                                                                                                | *    | 0.82  | *    | *    | * | 1 | 1      | VLTFLLRR                                                                      | 1      |
| HS12A_HUMAN (O43301) Heat shock 70 kDa protein 12A [MASS=74978]                                                                                                                                                                                                             | 0.70 | 7.85  | 0.87 | 0.00 | 1 | 2 | 2<br>3 | SNVDFVKWSSQGM[147]LRM[147]SPDAM[147]NALFK<br>FLFLVGGFAEAPLLQQAQVAAFGDQC[339]R | 1<br>1 |
| HS12B_HUMAN (Q96MM6) Heat shock 70 kDa protein 12B [MASS=75687]                                                                                                                                                                                                             | 0.00 | 4.96  | 0.31 | 0.00 | 1 | 1 | 3      | M[147]SC[330]EAMNELFQPTVSGIIQHIEALLARPEVQGVK                                  | 1      |
| HS74L_HUMAN (O95757) Heat shock 70 kDa protein 4L (Osmotic stress protein 94) (Heat shock 70-related protein APG-1) [MASS=94486]                                                                                                                                            | 0.51 | 5.13  | 0.85 | 0.00 | 1 | 2 | 3<br>2 | C[330]HAEHTPEEEIDHTGAKTKSAVSDK<br>ANSEHNGPM[147]DGQSGTETK                     | 1<br>1 |
| HS90A_HUMAN (P07900) Heat shock protein HSP 90-alpha (HSP 86) (NY-REN-38 antigen) [MASS=84528]                                                                                                                                                                              | 0.92 | 2.60  | 0.68 | 0.00 | 1 | 1 | 2      | YYTSASGDEM[147]VSLKDYC[330]TR                                                 | 1      |

|                                                                                           |                                   |      |      |      |   |   |                                                                                                                |                                   |       |      |      |    |    |   |                      |   |
|-------------------------------------------------------------------------------------------|-----------------------------------|------|------|------|---|---|----------------------------------------------------------------------------------------------------------------|-----------------------------------|-------|------|------|----|----|---|----------------------|---|
| HS90B_HUMAN (P08238) Heat shock protein HSP 90-beta (HSP 84) (HSP 90) [MASS=83132]        | *                                 | 1.11 | *    | *    | * | 1 | 2                                                                                                              | KM[147]EESKAK                     | 1     |      |      |    |    |   |                      |   |
| HSP71_HUMAN (P08107) Heat shock 70 kDa protein 1 (HSP70.1) (HSP70-1/HSP70-2) [MASS=70052] | 0.00                              | 7.33 | 1.41 | 0.00 | 1 | 2 | 2                                                                                                              | MAKAAAIGIDLGTTYSC[330]VGVFQHGK    | 1     |      |      |    |    |   |                      |   |
|                                                                                           |                                   |      |      |      |   |   | 2                                                                                                              | AAAIGIDLGTTYSC[330]VGVFQHGK       | 1     |      |      |    |    |   |                      |   |
| HXD8_HUMAN (P13378) Homeobox protein Hox-D8 (Hox-4E) (Hox-5.4) [MASS=31910]               | 0.00                              | 6.55 | 0.33 | 0.00 | 1 | 1 | 2                                                                                                              | QPIFTTQQAELVQYPDC[330]K           | 1     |      |      |    |    |   |                      |   |
|                                                                                           |                                   |      |      |      |   |   | 1                                                                                                              | LPVGFTFSFPC[339]QQSK              | 2     |      |      |    |    |   |                      |   |
|                                                                                           |                                   |      |      |      |   |   | 3                                                                                                              | LGVEPSDDDC[339]VSVQHVC[330]TIVSFR | 1     |      |      |    |    |   |                      |   |
|                                                                                           |                                   |      |      |      |   |   | 2                                                                                                              | TVC[339]GVVSR                     | 1     |      |      |    |    |   |                      |   |
|                                                                                           |                                   |      |      |      |   |   | 2                                                                                                              | AILQQLGLNSTC[330]DDSILVK          | 1     |      |      |    |    |   |                      |   |
|                                                                                           |                                   |      |      |      |   |   | 2                                                                                                              | LPVGFTFSFPC[330]QQSK              | 2     |      |      |    |    |   |                      |   |
|                                                                                           |                                   |      |      |      |   |   | 2                                                                                                              | C[339]NVSFLLSEDGSGKGAALITAVGVR    | 1     |      |      |    |    |   |                      |   |
|                                                                                           |                                   |      |      |      |   |   | 1                                                                                                              | C[339]NVSFLLSEDGSGK               | 1     |      |      |    |    |   |                      |   |
|                                                                                           |                                   |      |      |      |   |   | 3                                                                                                              | LGVEPSDDDC[339]VSVQHVC[339]TIVSFR | 1     |      |      |    |    |   |                      |   |
|                                                                                           |                                   |      |      |      |   |   | 2                                                                                                              | C[330]NVSFLLSEDGSGK               | 2     |      |      |    |    |   |                      |   |
|                                                                                           |                                   |      |      |      |   |   | 1                                                                                                              | ATDC[339]VGHVVTLLR                | 2     |      |      |    |    |   |                      |   |
|                                                                                           |                                   |      |      |      |   |   | HXK1_HUMAN (P19367) Hexokinase-1 (EC 2.7.1.1) (Hexokinase type I) (HK I) (Brain form hexokinase) [MASS=102484] | 1.00                              | 21.70 | 1.74 | 0.07 | 33 | 12 | 1 | TVC[339]GVVSR        | 1 |
|                                                                                           |                                   |      |      |      |   |   |                                                                                                                |                                   |       |      |      |    |    | 1 | LPVGFTFSFPC[330]QQSK | 1 |
| 2                                                                                         | LPVGFTFSFPC[339]QQSK              | 4    |      |      |   |   |                                                                                                                |                                   |       |      |      |    |    |   |                      |   |
| 2                                                                                         | TVC[330]GVVSR                     | 1    |      |      |   |   |                                                                                                                |                                   |       |      |      |    |    |   |                      |   |
| 2                                                                                         | EMKNGLSRDFNPTATVK                 | 1    |      |      |   |   |                                                                                                                |                                   |       |      |      |    |    |   |                      |   |
| 2                                                                                         | AAQLC[330]GAGM[147]AAVVDK         | 1    |      |      |   |   |                                                                                                                |                                   |       |      |      |    |    |   |                      |   |
| 2                                                                                         | AAQLC[339]GAGM[147]AAVVDKIR       | 1    |      |      |   |   |                                                                                                                |                                   |       |      |      |    |    |   |                      |   |
| 3                                                                                         | LGVEPSDDDC[330]VSVQHVC[330]TIVSFR | 1    |      |      |   |   |                                                                                                                |                                   |       |      |      |    |    |   |                      |   |
| 2                                                                                         | LGVEPSDDDC[330]VSVQHVC[330]TIVSFR | 1    |      |      |   |   |                                                                                                                |                                   |       |      |      |    |    |   |                      |   |
| 2                                                                                         | C[339]NVSFLLSEDGSGK               | 2    |      |      |   |   |                                                                                                                |                                   |       |      |      |    |    |   |                      |   |
| 2                                                                                         | LGVEPSDDDC[339]VSVQHVC[330]TIVSFR | 1    |      |      |   |   |                                                                                                                |                                   |       |      |      |    |    |   |                      |   |

|                                                                                                                                                      |      |       |      |      |    |    |   |   |                                       |   |
|------------------------------------------------------------------------------------------------------------------------------------------------------|------|-------|------|------|----|----|---|---|---------------------------------------|---|
|                                                                                                                                                      |      |       |      |      |    |    |   | 2 | AILQQLGLNSTC[339]DDSILVK              | 1 |
|                                                                                                                                                      |      |       |      |      |    |    |   | 2 | AAQLC[330]GAGMAAVVDK                  | 1 |
|                                                                                                                                                      |      |       |      |      |    |    |   | 2 | ATDC[339]VGHVVTLLR                    | 1 |
|                                                                                                                                                      |      |       |      |      |    |    |   | 2 | RAAQLC[339]GAGM[147]AAVVDK            | 2 |
| HXK1_HUMAN (P19367) Hexokinase-1 (EC 2.7.1.1) (Hexokinase type I) (HK I) (Brain form hexokinase) [MASS=102484]                                       | 1.00 | 21.70 | 1.74 | 0.07 | 33 | 12 |   | 2 | AAQLC[339]GAGM[147]AAVVDK             | 2 |
|                                                                                                                                                      |      |       |      |      |    |    |   | 2 | KLPVGFTFSFPC[330]QQSK                 | 1 |
|                                                                                                                                                      |      |       |      |      |    |    |   | 2 | KLPVGFTFSFPC[339]QQSK                 | 1 |
|                                                                                                                                                      |      |       |      |      |    |    |   | 2 | AAQLC[330]GAGM[147]AAVVDKIR           | 1 |
|                                                                                                                                                      |      |       |      |      |    |    |   | 2 | RAAQLC[330]GAGM[147]AAVVDK            | 1 |
| I12R2_HUMAN (Q99665) Interleukin-12 receptor beta-2 chain precursor (IL-12 receptor beta-2) (IL-12R-beta2) [MASS=97135]                              | 0.00 | 2.32  | 1.04 | 0.00 | 1  | 2  |   | 2 | EIPDPANSTC[339]AKK                    | 1 |
|                                                                                                                                                      |      |       |      |      |    |    |   | 1 | HDLLDLK                               | 1 |
| I2C1_HUMAN (Q9UL18) Eukaryotic translation initiation factor 2C 1 (eIF2C 1) (eIF-2C 1) (Argonaute-1) (Putative RNA-binding protein Q99) [MASS=97214] | 0.00 | 5.37  | 1.40 | 0.00 | 1  | 3  |   | 2 | QC[339]REEVLKNFTDQLR                  | 1 |
|                                                                                                                                                      |      |       |      |      |    |    |   | 2 | C[339]IKKLTDNQTSTM[147]IK             | 1 |
|                                                                                                                                                      |      |       |      |      |    |    |   | 2 | KLTDNQTSTMIKATAR                      | 1 |
| I2C3_HUMAN (Q9H9G7) Eukaryotic translation initiation factor 2C 3 (eIF2C 3) (eIF-2C 3) (Argonaute-3) [MASS=97360]                                    | 0.00 | 2.21  | *    | *    | *  | 1  |   | 2 | LVRSANYETDPFVQEFQFK                   | 1 |
| I2C4_HUMAN (Q9HCK5) Eukaryotic translation initiation factor 2C 4 (eIF2C 4) (eIF-2C 4) (Argonaute-4) [MASS=97096]                                    | 0.00 | 0.58  | *    | *    | *  | 1  | 1 | 1 | IYYR                                  | 1 |
| I5P1_HUMAN (Q14642) Type I inositol-1,4,5-trisphosphate 5-phosphatase (EC 3.1.3.56) (5PTase) [MASS=47819]                                            | *    | 2.91  | *    | *    | *  | 1  | 3 | 3 | KLFDYFNQEVFR                          | 1 |
|                                                                                                                                                      |      |       |      |      |    |    |   | 2 | GNPEPSVHC[339]AR                      | 1 |
|                                                                                                                                                      |      |       |      |      |    |    |   | 3 | C[339]EARGNPEPSVHC[330]AR             | 1 |
| ICAM5_HUMAN (Q9UMF0) Intercellular adhesion molecule 5 precursor (ICAM-5) (Telencephalin) [MASS=97330]                                               | 1.00 | 10.82 | 0.59 | 0.10 | 4  | 6  |   | 2 | EDAGTYHC[330]VATNAHGTDSDR             | 1 |
|                                                                                                                                                      |      |       |      |      |    |    |   | 2 | ALSGTYRC[330]K                        | 1 |
|                                                                                                                                                      |      |       |      |      |    |    |   | 3 | VSREDAGTYHC[339]VATNAHGTDSDRTVTVGVEYR | 1 |
|                                                                                                                                                      |      |       |      |      |    |    |   | 2 | GNPEPSVHC[330]AR                      | 1 |
|                                                                                                                                                      |      |       |      |      |    |    |   | 2 | LFSC[330]EVDGKQPQSVK                  | 1 |

|                                                                                                                                                                                         |      |       |      |      |    |   |  |   |                                               |   |
|-----------------------------------------------------------------------------------------------------------------------------------------------------------------------------------------|------|-------|------|------|----|---|--|---|-----------------------------------------------|---|
|                                                                                                                                                                                         |      |       |      |      |    |   |  | 2 | EVAESC[339]KDIK                               | 2 |
|                                                                                                                                                                                         |      |       |      |      |    |   |  | 2 | TFDLYANVRPC[330]VSIEGYK                       | 1 |
|                                                                                                                                                                                         |      |       |      |      |    |   |  | 2 | C[339]REVAESC[339]K                           | 2 |
| IDH3A_HUMAN (P50213) Isocitrate dehydrogenase [NAD] subunit alpha, mitochondrial precursor (EC 1.1.1.41) (Isocitric dehydrogenase) (NAD(+)-specific ICDH) [MASS=39591]                  | 1.00 | 35.52 | 1.55 | 0.06 | 9  | 9 |  | 2 | TFDLYANVRPC[339]VSIEGYK                       | 1 |
|                                                                                                                                                                                         |      |       |      |      |    |   |  | 2 | C[339]SDFTEEIC[339]R                          | 1 |
|                                                                                                                                                                                         |      |       |      |      |    |   |  | 3 | SLTKDLGGNAKC[339]SDFTEEIC[339]R               | 1 |
|                                                                                                                                                                                         |      |       |      |      |    |   |  | 2 | C[339]REVAESC[339]KDIK                        | 1 |
|                                                                                                                                                                                         |      |       |      |      |    |   |  | 3 | HM[147]GLFDHAARIEAAC[330]FATIK                | 1 |
|                                                                                                                                                                                         |      |       |      |      |    |   |  | 2 | EVAESC[330]KDIK                               | 1 |
|                                                                                                                                                                                         |      |       |      |      |    |   |  | 2 | KTFDLYANVRPC[339]VSIEGYK                      | 1 |
|                                                                                                                                                                                         |      |       |      |      |    |   |  | 2 | MSDGLFLQKC[330]R                              | 1 |
| IDH3G_HUMAN (P51553) Isocitrate dehydrogenase [NAD] subunit gamma, mitochondrial precursor (EC 1.1.1.41) (Isocitric dehydrogenase) (NAD(+)-specific ICDH) [MASS=42794]                  | 1.00 | 18.07 | 1.51 | 0.03 | 4  | 5 |  | 2 | TSLDLYANVIHC[339]K                            | 1 |
|                                                                                                                                                                                         |      |       |      |      |    |   |  | 2 | LGDGLFLQC[339]C[339]R                         | 1 |
|                                                                                                                                                                                         |      |       |      |      |    |   |  | 3 | AKSLRIAEYAFK                                  | 1 |
|                                                                                                                                                                                         |      |       |      |      |    |   |  | 2 | IAEYAFKLAQESGRK                               | 1 |
|                                                                                                                                                                                         |      |       |      |      |    |   |  | 2 | NIANPTATLLASC[339]M[147]M[147]LDHLK           | 1 |
|                                                                                                                                                                                         |      |       |      |      |    |   |  | 2 | NIANPTATLLASC[330]M[147]M[147]LDHLK           | 1 |
| IDHP_HUMAN (P48735) Isocitrate dehydrogenase [NADP], mitochondrial precursor (EC 1.1.1.42) (Oxalosuccinate decarboxylase) (IDH) (NADP(+)-specific ICDH) (IDP) (ICD-M) [MASS=50909]      | 1.00 | 14.60 | 1.38 | 0.12 | 10 | 5 |  | 2 | NILGGTVFREPIIC[339]K                          | 1 |
|                                                                                                                                                                                         |      |       |      |      |    |   |  | 2 | C[339]ATITPDEARVEEFK                          | 1 |
|                                                                                                                                                                                         |      |       |      |      |    |   |  | 2 | VC[339]VETVESGAM[147]TK                       | 1 |
|                                                                                                                                                                                         |      |       |      |      |    |   |  | 2 | DLAGC[339]IHGLSNVK                            | 1 |
|                                                                                                                                                                                         |      |       |      |      |    |   |  | 2 | VC[330]VETVESGAM[147]TK                       | 2 |
| IF4G2_HUMAN (P78344) Eukaryotic translation initiation factor 4 gamma 2 (eIF-4-gamma 2) (eIF-4G 2) (eIF4G 2) (p97) (Death-associated protein 5) (DAP-5) [MASS=102361]                   | 0.00 | 14.44 | 0.14 | 0.00 | 1  | 6 |  | 2 | C[330]ATITPDEAR                               | 1 |
|                                                                                                                                                                                         |      |       |      |      |    |   |  | 2 | C[330]ATITPDEARVEEFK                          | 1 |
|                                                                                                                                                                                         |      |       |      |      |    |   |  | 2 | NILGGTVFREPIIC[330]K                          | 2 |
|                                                                                                                                                                                         |      |       |      |      |    |   |  | 2 | DLAGC[330]IHGLSNVK                            | 1 |
|                                                                                                                                                                                         |      |       |      |      |    |   |  | 2 | M[147]C[330]SLM[147]LSKELPARIR                | 1 |
|                                                                                                                                                                                         |      |       |      |      |    |   |  | 3 | HRSNQLFNHGHHIMPPTQSQFGEM[147]GGK              | 1 |
|                                                                                                                                                                                         |      |       |      |      |    |   |  | 2 | LILKGVILLIVDKALEEPK                           | 1 |
|                                                                                                                                                                                         |      |       |      |      |    |   |  | 2 | DPLGGLADMFGQM[147]PGSGIGTGPGVIQDRFSPTM[147]GR | 1 |
|                                                                                                                                                                                         |      |       |      |      |    |   |  | 3 | ELPARIRFLLQDVELR                              | 1 |
|                                                                                                                                                                                         |      |       |      |      |    |   |  | 2 | LC[339]LELLNVGVESKLILK                        | 1 |
| IF5A1_HUMAN (P63241) Eukaryotic translation initiation factor 5A-1 (eIF-5A-1) (eIF-5A1) (Eukaryotic initiation factor 5A isoform 1) (eIF-5A) (eIF-4D) (Rev-binding factor) [MASS=16701] | 0.90 | 12.42 | *    | *    | *  | 1 |  | 3 | KYEDIC[330]PSTHNM[147]DVPNIKR                 | 1 |

|                                                                                                                                                                                                                                           |      |       |      |      |   |   |   |                                                       |    |
|-------------------------------------------------------------------------------------------------------------------------------------------------------------------------------------------------------------------------------------------|------|-------|------|------|---|---|---|-------------------------------------------------------|----|
| IF5A2_HUMAN (Q9GZV4) Eukaryotic translation initiation factor 5A-2 (eIF-5A-2) (eIF-5A2) (Eukaryotic initiation factor 5A isoform 2) [MASS=16662]                                                                                          | 0.90 | 37.50 | 0.76 | 0.00 | 1 | 2 | 3 | ADEIDFTTG DAGASSTYPM[147]QC[339]SALR                  | 1  |
|                                                                                                                                                                                                                                           |      |       |      |      |   |   | 3 | EIEGKYNAGEDVQVSVM[147]C[339]AM[147]SEEYAVAIAKPC[339]K | 1  |
| IFNA6_HUMAN (P05013) Interferon alpha-6 precursor (Interferon alpha-K) (LeIF K) (Interferon alpha-54) [MASS=22140]                                                                                                                        | 0.00 | 8.99  | 1.53 | 0.00 | 1 | 1 | 2 | M[147]ALPFALLMALVVLSC[339]K                           | 1  |
| IGHD_HUMAN (P01880) Ig delta chain C region [MASS=42125]                                                                                                                                                                                  | 0.00 | 12.27 | 0.75 | 0.00 | 1 | 2 | 3 | LM[147]ALREPAQAQAPVK                                  | 1  |
|                                                                                                                                                                                                                                           |      |       |      |      |   |   | 3 | DNSPVVLAC[339]LITGYHPTSVTVTWYMGTSQSPQR                | 1  |
| IGS4B_HUMAN (Q8N126) Immunoglobulin superfamily member 4B precursor (Nectin-like protein 1) (TSLC1-like protein 1) (Synaptic cell adhesion molecule 3) (Brain immunoglobulin receptor) [MASS=43300]                                       | 1.00 | 9.05  | 0.54 | 0.24 | 7 | 2 | 3 | EKDTATLNC[339]QSSGSKPAAR                              | 1  |
|                                                                                                                                                                                                                                           |      |       |      |      |   |   | 2 | EKDTATLNC[330]QSSGSKPAAR                              | 1  |
|                                                                                                                                                                                                                                           |      |       |      |      |   |   | 2 | EDDGASIVC[330]SVNHESLK                                | 2  |
|                                                                                                                                                                                                                                           |      |       |      |      |   |   | 2 | EDDGASIVC[339]SVNHESLK                                | 1  |
|                                                                                                                                                                                                                                           |      |       |      |      |   |   | 3 | EKDTATLNC[330]QSSGSKPAAR                              | 2  |
| IGSF8_HUMAN (Q969P0) Immunoglobulin superfamily member 8 precursor (CD81 partner 3) (Glu-Trp-Ile EWI motif-containing protein 2) (EWI-2) (Keratinocytes-associated transmembrane protein 4) (KCT-4) (LIR-D1) (CD316 antigen) [MASS=65034] | 0.98 | 3.10  | 0.36 | 0.00 | 1 | 1 | 2 | LQAQDAGIYEC[330]HTPSTDTR                              | 1  |
|                                                                                                                                                                                                                                           |      |       |      |      |   |   | 3 | KWKSSFQHHHLR                                          | 11 |
|                                                                                                                                                                                                                                           |      |       |      |      |   |   |   |                                                       |    |
| IL1F8_HUMAN (Q9NZH7) Interleukin-1 family member 8 (IL-1F8) (Interleukin-1 eta) (IL-1 eta) (FIL1 eta) (Interleukin-1 homolog 2) (IL-1H2) [MASS=18521]                                                                                     | *    | 16.46 | *    | *    | * | 2 |   |                                                       |    |
|                                                                                                                                                                                                                                           |      |       |      |      |   |   | 3 | DFSSMRTNIGM[147]PGRM                                  | 1  |
| IL2RB_HUMAN (P14784) Interleukin-2 receptor beta chain precursor (IL-2 receptor) (P70-75) (p75) (High affinity IL-2 receptor subunit beta) (CD122 antigen) [MASS=61117]                                                                   | 0.00 | 7.99  | 1.26 | 0.00 | 1 | 2 | 3 | LPLLILLPLATSWASAAVNGTSQFTC[330]FYNSR                  | 1  |
|                                                                                                                                                                                                                                           |      |       |      |      |   |   | 2 | EAGEEVPDAGPR                                          | 4  |

|                                                                                                                                                                               |      |       |      |      |   |   |   |                                       |   |
|-------------------------------------------------------------------------------------------------------------------------------------------------------------------------------|------|-------|------|------|---|---|---|---------------------------------------|---|
| IMMT_HUMAN (Q16891) Mitochondrial inner membrane protein (Mitofilin) (p87/89) (Proliferation-inducing gene 4 protein) [MASS=83677]                                            | 1.00 | 11.08 | 1.83 | 0.01 | 2 | 4 | 2 | ANC[339]SDNEFTQALTAIIPPELTR           | 1 |
|                                                                                                                                                                               |      |       |      |      |   |   | 2 | VQAAQSEAKVVSQYHELVVQAR                | 1 |
|                                                                                                                                                                               |      |       |      |      |   |   | 2 | RLSQEQVDNFTLDINTAYAR                  | 1 |
|                                                                                                                                                                               |      |       |      |      |   |   | 2 | LLSYASYC[339]IEHGDLELAAK              | 1 |
|                                                                                                                                                                               |      |       |      |      |   |   | 3 | RNGSGVFISDIVK                         | 1 |
| INADL_HUMAN (Q8NI35) InaD-like protein (Inadl protein) (hINADL) (Pals1-associated tight junction protein) (Protein associated to tight junctions) [MASS=196385]               | *    | 4.72  | *    | *    | * | 5 | 3 | EELVDEPFLDLGKSFHSQQK                  | 1 |
|                                                                                                                                                                               |      |       |      |      |   |   | 3 | MKLQEKGDTSQNEK                        | 1 |
|                                                                                                                                                                               |      |       |      |      |   |   | 2 | NC[330]GNSVRMLVAR                     | 1 |
|                                                                                                                                                                               |      |       |      |      |   |   | 3 | DPAGDISVTPPAPAALPVALPTVASK            | 1 |
| INT10_HUMAN (Q9NVR2) Integrator complex subunit 10 (Int10) [MASS=82235]                                                                                                       | 0.00 | 1.97  | 1.08 | 0.00 | 1 | 1 | 3 | IC[339]LAWKTDTWLWLR                   | 1 |
| INVS_HUMAN (Q9Y283) Inversin (Inversion of embryo turning homolog) (Nephrocystin-2) [MASS=117826]                                                                             | 0.00 | 8.45  | *    | *    | * | 5 | 3 | HM[147]KQLGAGDVDRWR                   | 1 |
|                                                                                                                                                                               |      |       |      |      |   |   | 3 | M[147]NKSENLFFAGSSLASQVHAAAVNGDKGALQR | 1 |
|                                                                                                                                                                               |      |       |      |      |   |   | 2 | NFSYNLQSATQPK                         | 1 |
|                                                                                                                                                                               |      |       |      |      |   |   | 2 | IPLHWAANHKDPSAVHTVR                   | 1 |
|                                                                                                                                                                               |      |       |      |      |   |   | 2 | HRSPKC[330]LALLLK                     | 1 |
| IP6K1_HUMAN (Q92551) Inositol hexaphosphate kinase 1 (EC 2.7.4.21) (InsP6 kinase 1) (Inositol hexakisphosphate kinase 1) [MASS=50235]                                         | *    | 3.40  | *    | *    | * | 1 | 2 | ASLSLETSESSQEA                        | 1 |
| IPKG_HUMAN (Q9Y2B9) cAMP-dependent protein kinase inhibitor gamma (PKI-gamma) [MASS=7910]                                                                                     | 0.00 | 21.05 | 5.39 | 0.00 | 1 | 1 | 3 | M[147]M[147]EVESYSDFISC[339]DR        | 1 |
| IPO7_HUMAN (O95373) Importin-7 (Imp7) (Ran-binding protein 7) (RanBP7) [MASS=119516]                                                                                          | 0.00 | 5.01  | 0.90 | 0.00 | 1 | 3 | 2 | TM[147]GFC[330]YQILTEPNADPRK          | 1 |
|                                                                                                                                                                               |      |       |      |      |   |   | 1 | AAHESK                                | 1 |
|                                                                                                                                                                               |      |       |      |      |   |   | 3 | LLEVILQC[330]KGRGIDQC[339]IPLFVEAALER | 1 |
| IQGA2_HUMAN (Q13576) Ras GTPase-activating-like protein IQGAP2 [MASS=180480]                                                                                                  | 0.00 | 3.81  | 1.33 | 0.00 | 1 | 3 | 2 | EEVVTKIRANQQLEK                       | 1 |
|                                                                                                                                                                               |      |       |      |      |   |   | 2 | RQNIAYEYLC[339]HLEEAQR                | 1 |
|                                                                                                                                                                               |      |       |      |      |   |   | 3 | EIEDIIEEVTVGYIRENIWSASELLLR           | 1 |
| IRAK3_HUMAN (Q9Y616) Interleukin-1 receptor-associated kinase 3 (EC 2.7.11.1) (IRAK-3) (IL-1 receptor-associated kinase M) (IRAK-M) [MASS=67752]                              | *    | 2.01  | *    | *    | * | 1 | 3 | GLDSC[339]LSFLDKK                     | 1 |
| IRK13_HUMAN (O60928) Inward rectifier potassium channel 13 (Potassium channel, inwardly rectifying subfamily J member 13) (Inward rectifier K(+) channel Kir7.1) [MASS=40529] | *    | 6.67  | *    | *    | * | 1 | 3 | GEYQIKMENFDKTVPEFPTPLVSK              | 1 |

|                                                                                                                                                                                                                        |                       |       |      |      |   |   |   |                                         |   |
|------------------------------------------------------------------------------------------------------------------------------------------------------------------------------------------------------------------------|-----------------------|-------|------|------|---|---|---|-----------------------------------------|---|
| IRK14_HUMAN (Q9UNX9) ATP-sensitive inward rectifier potassium channel 14 (Potassium channel, inwardly rectifying subfamily J member 14) (Inward rectifier K(+) channel Kir2.4) (IRK4) [MASS=47845]                     | 0.00                  | 2.98  | 2.67 | 0.00 | 1 | 1 | 2 | YLSDLFTTC[339]VDVR                      | 1 |
| IRK6_HUMAN (P48051) G protein-activated inward rectifier potassium channel 2 (GIRK2) (Potassium channel, inwardly rectifying subfamily J member 6) (Inward rectifier K(+) channel Kir3.2) (KATP-2) (BIR1) [MASS=48451] | 0.00                  | 5.44  | 2.16 | 0.00 | 1 | 1 | 2 | EELEIVVILEGM[147]VEATGM[147]TC[339]QAR  | 1 |
| IRS2_HUMAN (Q9Y4H2) Insulin receptor substrate 2 (IRS-2) [MASS=137333]                                                                                                                                                 | *                     | 1.94  | *    | *    | * | 1 | 3 | DGGGGGEFYGYMTM[147]DRPLSHC[339]GRSYR    | 1 |
| ISK5_HUMAN (Q9NQ38) Serine protease inhibitor Kazal-type 5 precursor (Lympho-epithelial Kazal-type-related inhibitor) (LEKTI) [Contains: Hemofiltrate peptide HF6478; Hemofiltrate peptide HF7665] [MASS=120758]       | 0.00                  | 5.26  | 0.70 | 0.00 | 1 | 4 | 2 | NNELIC[330]PR                           | 1 |
|                                                                                                                                                                                                                        |                       |       |      |      |   |   | 3 | GPYGKMHINKC[339]AMC[330]QSIFDR          | 1 |
|                                                                                                                                                                                                                        |                       |       |      |      |   |   | 2 | EEKGKVEAEK                              | 1 |
|                                                                                                                                                                                                                        |                       |       |      |      |   |   | 2 | FFQSLDGIMFINKC[330]ATC[330]K            | 1 |
| ISK6_HUMAN (Q6UWN8) Serine protease inhibitor Kazal-type 6 precursor [MASS=8585]                                                                                                                                       | 0.00                  | 26.25 | 0.71 | 0.00 | 1 | 2 | 1 | AIVKSGGK                                | 1 |
|                                                                                                                                                                                                                        |                       |       |      |      |   |   | 2 | C[330]AFC[330]KAIVKSGGK                 | 1 |
| ITA11_HUMAN (Q9UKX5) Integrin alpha-11 precursor [MASS=133609]                                                                                                                                                         | *                     | 4.79  | *    | *    | * | 3 | 3 | C[339]PVIHGNC[330]TKLNLGRVTLNSVSR       | 1 |
|                                                                                                                                                                                                                        |                       |       |      |      |   |   | 2 | LGFFRSAR                                | 1 |
|                                                                                                                                                                                                                        |                       |       |      |      |   |   | 3 | VMIVITDGESHDSPLEKVIQQSER                | 1 |
|                                                                                                                                                                                                                        |                       |       |      |      |   |   | 3 | QHNSC[339]TTENKNEPC[339]GAR             | 1 |
| ITA1_HUMAN (P56199) Integrin alpha-1 (Laminin and collagen receptor) (VLA-1) (CD49a antigen) [MASS=127837]                                                                                                             | 0.00                  | 11.21 | 1.23 | 0.00 | 1 | 7 | 2 | SIASEPTEKHFFNVSEDELALVTIVK              | 1 |
|                                                                                                                                                                                                                        |                       |       |      |      |   |   | 3 | C[339]PVGRGESLPC[339]VKLDLPVNTSIPNVTEVK | 1 |
|                                                                                                                                                                                                                        |                       |       |      |      |   |   | 2 | NC[330]HM[147]EGK                       | 1 |
|                                                                                                                                                                                                                        |                       |       |      |      |   |   | 3 | DSC[330]ESNHNITC[330]KVGYPFLR           | 1 |
|                                                                                                                                                                                                                        |                       |       |      |      |   |   | 2 | SQNDKFNVSLTVKNTK                        | 1 |
| 3                                                                                                                                                                                                                      | KVM[147]VIVTDGESHDNHR | 1     |      |      |   |   |   |                                         |   |
| ITA2B_HUMAN (P08514) Integrin alpha-IIb precursor (Platelet membrane glycoprotein IIb) (GPIIb) (CD41 antigen) [Contains: Integrin alpha-IIb heavy chain; Integrin alpha-IIb light chain] [MASS=113390]                 | 0.00                  | 2.12  | 0.53 | 0.00 | 1 | 1 | 3 | TPVSC[330]FNIQM[147]C[330]VGATGHNIPQK   | 1 |



|                                                                                                                                                                                                                                                                              |      |       |      |      |   |   |   |                                                 |   |
|------------------------------------------------------------------------------------------------------------------------------------------------------------------------------------------------------------------------------------------------------------------------------|------|-------|------|------|---|---|---|-------------------------------------------------|---|
| ITA2_HUMAN (P17301) Integrin alpha-2 precursor (Platelet membrane glycoprotein Ia) (GPIa) (Collagen receptor) (VLA-2 alpha chain) (CD49b antigen) [MASS=129295]                                                                                                              | *    | 1.61  | *    | *    | * | 1 | 2 | GILGQHGFLEGGEGIENTR                             | 1 |
| ITA6_HUMAN (P23229) Integrin alpha-6 precursor (VLA-6) (CD49f antigen) [Contains: Integrin alpha-6 heavy chain; Integrin alpha-6 light chain] [MASS=126618]                                                                                                                  | 0.00 | 2.39  | 1.06 | 0.00 | 1 | 1 | 3 | EDQWMGVTVQSQGGKVVTC[330]AHRYEK                  | 1 |
| ITAD_HUMAN (Q13349) Integrin alpha-D precursor (Leukointegrin alpha D) (ADB2) (CD11d antigen) [MASS=126885]                                                                                                                                                                  | 0.00 | 3.87  | 0.78 | 0.00 | 1 | 2 | 3 | PEAVNM[147]SLGLTLAASTNGSRLAC[339]GPTLHR         | 1 |
|                                                                                                                                                                                                                                                                              |      |       |      |      |   |   | 2 | SPMLDC[330]SIADC[330]LQFR                       | 1 |
| ITLN2_HUMAN (Q8WWU7) Intelectin-2 precursor (Endothelial lectin HL-2) [MASS=36211]                                                                                                                                                                                           | *    | 12.92 | *    | *    | * | 2 | 2 | EFVAGFVQFR                                      | 1 |
|                                                                                                                                                                                                                                                                              |      |       |      |      |   |   | 3 | NGVVYQTFCC[339]DM[147]TSGGGWTLVASVHENDMRGK      | 1 |
| IVD_HUMAN (P26440) Isovaleryl-CoA dehydrogenase, mitochondrial precursor (EC 1.3.99.10) (IVD) [MASS=46319]                                                                                                                                                                   | 0.96 | 13.71 | 1.54 | 0.00 | 1 | 4 | 3 | IGHFQLMQGKMADM[147]YTR                          | 1 |
|                                                                                                                                                                                                                                                                              |      |       |      |      |   |   | 2 | MADMYTRLMAC[339]R                               | 1 |
|                                                                                                                                                                                                                                                                              |      |       |      |      |   |   | 2 | AC[339]DEGHC[339]TAK                            | 1 |
|                                                                                                                                                                                                                                                                              |      |       |      |      |   |   | 2 | GITAFIVEKGMFGFSTSKK                             | 1 |
| JAD1C_HUMAN (P41229) Jumonji/ARID domain-containing protein 1C (SmcX protein) (Xe169 protein) [MASS=175804]                                                                                                                                                                  | *    | 0.83  | *    | *    | * | 1 | 3 | EFGSGFPVSDSKR                                   | 1 |
| JAG2_HUMAN (Q9Y219) Jagged-2 precursor (Jagged2) (HJ2) [MASS=133365]                                                                                                                                                                                                         | *    | 4.52  | *    | *    | * | 3 | 2 | AGGC[330]GHDEC[330]DTYVRVC[330]LK               | 1 |
|                                                                                                                                                                                                                                                                              |      |       |      |      |   |   | 2 | RADEALPGPAGHA AVR                               | 1 |
|                                                                                                                                                                                                                                                                              |      |       |      |      |   |   | 2 | ARAGGDQDPGLVVPFQFAWPR                           | 1 |
| JARD2_HUMAN (Q92833) Jumonji protein (Jumonji/ARID domain-containing protein 2) [MASS=138734]                                                                                                                                                                                | *    | 2.09  | *    | *    | * | 2 | 1 | PQSPPKK                                         | 1 |
|                                                                                                                                                                                                                                                                              |      |       |      |      |   |   | 2 | TVQSQGFVVC[330]FPGSFVSK                         | 1 |
| JHD1B_HUMAN (Q8NHM5) JmjC domain-containing histone demethylation protein 1B (EC 1.14.11.-) (F-box/LRR-repeat protein 10) (F-box and leucine-rich repeat protein 10) (F-box protein FBL10) (Protein JEMMA) (Jumonji domain-containing EMSY-interactor methyltr [MASS=152614] | 0.00 | 7.49  | 0.78 | 0.00 | 1 | 5 | 3 | FNLM[147]LM[147]EC[339]SIC[330]NEIHPGC[339]LKIK | 1 |
|                                                                                                                                                                                                                                                                              |      |       |      |      |   |   | 2 | PPGIC[339]ER                                    | 1 |
|                                                                                                                                                                                                                                                                              |      |       |      |      |   |   | 2 | QTEATNAIAEM[147]KYPKVK                          | 1 |
|                                                                                                                                                                                                                                                                              |      |       |      |      |   |   | 3 | PTVVDLVDVVDNMWPQHLKEKQTEATNAIAEM[147]K          | 1 |
|                                                                                                                                                                                                                                                                              |      |       |      |      |   |   | 3 | EVWMAVFSYLSHQDLC[339]VC[339]M[147]R             | 1 |
| JHD2C_HUMAN (Q15652) Probable JmjC domain-containing histone demethylation protein 2C (EC 1.14.11.-) (Jumonji domain-containing protein 1C) (Thyroid receptor-interacting protein 8) (TRIP-8) [MASS=284523]                                                                  | *    | 2.72  | *    | *    | * | 3 | 3 | RNSPSPWLHQPTVTSADGIGLLSHIPVRPSSAEPHR            | 1 |
|                                                                                                                                                                                                                                                                              |      |       |      |      |   |   | 3 | SGRTM[147]PNILDDIIASVVENKIPPSK                  | 1 |
|                                                                                                                                                                                                                                                                              |      |       |      |      |   |   | 2 | MNISLWK                                         | 1 |

|                                                                                                                                                   |      |       |       |      |   |   |   |                                   |    |
|---------------------------------------------------------------------------------------------------------------------------------------------------|------|-------|-------|------|---|---|---|-----------------------------------|----|
| JPH2_HUMAN (Q9BR39) Junctophilin-2 (Junctophilin type 2) (JP-2) [MASS=74221]                                                                      | *    | 2.59  | *     | *    | * | 1 | 2 | QKVEHSVEGAQRAAAIAR                | 1  |
| JUNB_HUMAN (P17275) Transcription factor jun-B [MASS=35879]                                                                                       | 0.00 | 14.70 | 1.37  | 0.00 | 1 | 2 | 2 | QKVMTHVSNGC[330]QLLLGVKGFHAF      | 1  |
|                                                                                                                                                   |      |       |       |      |   |   | 2 | MEQPFYHDDSYTATGYGRAPGGLSLHDYK     | 1  |
|                                                                                                                                                   |      |       |       |      |   |   | 2 | RVAEAHVPNFIFDEFR                  | 1  |
|                                                                                                                                                   |      |       |       |      |   |   | 2 | NLGMVC[339]R                      | 10 |
| K0196_HUMAN (Q12768) Protein KIAA0196 [MASS=134286]                                                                                               | 0.00 | 1.98  | 37.41 | 0.00 | 1 | 2 |   |                                   |    |
| K0310_HUMAN (O15027) Protein KIAA0310 [MASS=233516]                                                                                               | 0.00 | 5.14  | 0.78  | 0.00 | 1 | 6 | 2 | RSSLSSHSQSIYR                     | 1  |
|                                                                                                                                                   |      |       |       |      |   |   | 3 | C[330]SSM[147]SSLSR               | 1  |
|                                                                                                                                                   |      |       |       |      |   |   | 2 | YWC[339]DAEYDAYRREHSFAGDR         | 1  |
|                                                                                                                                                   |      |       |       |      |   |   | 2 | TEAYEYAQSLGAETC[330]PLPSFQVFK     | 1  |
|                                                                                                                                                   |      |       |       |      |   |   | 3 | NGLWGHALLLASKMDSRTHAR             | 1  |
|                                                                                                                                                   |      |       |       |      |   |   | 2 | TVQAAPPALPGPPGAPVNM[147]YSRR      | 1  |
| K1024_HUMAN (Q9UPX6) UPF0258 protein KIAA1024 [MASS=102992]                                                                                       | *    | 1.42  | *     | *    | * | 1 | 2 | SLC[330]ARFDLSQLAK                | 1  |
| K1045_HUMAN (Q9UPV7) Protein KIAA1045 [MASS=45191]                                                                                                | 1.00 | 9.75  | 0.78  | 0.13 | 2 | 3 | 2 | QTVEQVQKVS LAVSAFK                | 1  |
|                                                                                                                                                   |      |       |       |      |   |   | 2 | VFHDGC[330]LR                     | 1  |
|                                                                                                                                                   |      |       |       |      |   |   | 2 | VIPDC[330]SLTLEDFLR               | 1  |
| K1219_HUMAN (Q86X10) Protein KIAA1219 [MASS=166797]                                                                                               | *    | 3.55  | *     | *    | * | 3 | 2 | RSSINILLSLLPLPHFGTVK              | 1  |
|                                                                                                                                                   |      |       |       |      |   |   | 2 | EVPVIFIHPLNTGLFR                  | 1  |
|                                                                                                                                                   |      |       |       |      |   |   | 2 | RAISSVC[339]TYIVYQC[339]SR        | 1  |
| K1267_HUMAN (Q7Z3B3) Protein KIAA1267 [MASS=120965]                                                                                               | *    | 9.05  | *     | *    | * | 4 | 2 | LNLVSSSDGTC[339]VAARTRPVLSC[330]K | 1  |
|                                                                                                                                                   |      |       |       |      |   |   | 1 | DRHKLVSFLTTAK                     | 1  |
|                                                                                                                                                   |      |       |       |      |   |   | 3 | FKLAPPSTLSPGSAENNGNANILIAANGTKR   | 1  |
|                                                                                                                                                   |      |       |       |      |   |   | 2 | PVNGVINTLQPV LADHIPGDSSDAEEQLHK   | 1  |
| K1C10_HUMAN (P13645) Keratin, type I cytoskeletal 10 (Cytokeratin-10) (CK-10) (Keratin-10) (K10) [MASS=59518]                                     | 0.99 | 8.43  | 0.31  | 0.15 | 2 | 2 | 2 | YC[330]VQLSQIQAQISALEEQLQQR       | 2  |
|                                                                                                                                                   |      |       |       |      |   |   | 2 | NVSTGDVNVEMNAAPGVDLTQLLNMR        | 1  |
| K2C1_HUMAN (P04264) Keratin, type II cytoskeletal 1 (Cytokeratin-1) (CK-1) (Keratin-1) (K1) (67 kDa cyokeratin) (Hair alpha protein) [MASS=65886] | 0.99 | 6.22  | 0.68  | 0.00 | 1 | 2 | 3 | DYQELM[147]NTKLALDLEIATYR         | 1  |
|                                                                                                                                                   |      |       |       |      |   |   | 2 | FSSC[330]GGGGGSGFAGGGFGSR         | 1  |

|                                                                                                                                                                                                           |                                     |       |      |      |    |   |   |                                          |   |
|-----------------------------------------------------------------------------------------------------------------------------------------------------------------------------------------------------------|-------------------------------------|-------|------|------|----|---|---|------------------------------------------|---|
| K6PP_HUMAN (Q01813) 6-phosphofructokinase type C (EC 2.7.1.11) (Phosphofructokinase 1) (Phosphohexokinase) (Phosphofructo-1-kinase isozyme C) (PFK-C) (6-phosphofructokinase, platelet type) [MASS=85596] | 0.93                                | 5.23  | 1.22 | 0.00 | 1  | 2 | 2 | KFTTDDSIK[330]VLGISK                     | 1 |
|                                                                                                                                                                                                           |                                     |       |      |      |    |   | 3 | THSINALLIIGGFEAYLGLLELSAAR               | 2 |
|                                                                                                                                                                                                           |                                     |       |      |      |    |   |   |                                          |   |
| KAC_HUMAN (P01834) Ig kappa chain C region [MASS=11609]                                                                                                                                                   | 0.94                                | 33.96 | 0.63 | 0.00 | 1  | 2 | 2 | DSTYLSSTLTLSKADYEK                       | 1 |
|                                                                                                                                                                                                           |                                     |       |      |      |    |   | 2 | VYAC[330]EVTHQGLSSPVTK                   | 1 |
| KAD4_HUMAN (P27144) Adenylate kinase isoenzyme 4, mitochondrial (EC 2.7.4.3) (Adenylate kinase 3-like 1) (ATP-AMP transphosphorylase) [MASS=25268]                                                        | 0.98                                | 20.18 | 1.28 | 0.03 | 2  | 2 | 3 | SRGVLHQFSGTETNK                          | 1 |
|                                                                                                                                                                                                           |                                     |       |      |      |    |   | 3 | TLGQAEALDKIC[339]EVDLVISLNIPFETLKDR      | 2 |
|                                                                                                                                                                                                           |                                     |       |      |      |    |   |   |                                          |   |
| KCC2A_HUMAN (Q9UQM7) Calcium/calmodulin-dependent protein kinase type II alpha chain (EC 2.7.11.17) (CaM-kinase II alpha chain) (CaM kinase II alpha subunit) (CaMK-II subunit alpha) [MASS=54029]        | 1.00                                | 9.00  | 0.90 | 0.05 | 14 | 3 | 3 | MC[339]DPGMTAFEPEALGNLVEGLDFHR           | 1 |
|                                                                                                                                                                                                           |                                     |       |      |      |    |   | 3 | MC[339]DPGM[147]TAFEPEALGNLVEGLDFHR      | 1 |
|                                                                                                                                                                                                           |                                     |       |      |      |    |   | 2 | STVASC[339]M[147]HR                      | 2 |
|                                                                                                                                                                                                           |                                     |       |      |      |    |   | 2 | QETVDC[339]LKK                           | 1 |
|                                                                                                                                                                                                           |                                     |       |      |      |    |   | 2 | STVASC[330]MHR                           | 2 |
|                                                                                                                                                                                                           |                                     |       |      |      |    |   | 1 | QETVDC[330]LKK                           | 1 |
|                                                                                                                                                                                                           |                                     |       |      |      |    |   | 2 | M[147]C[330]DPGMTAFEPEALGNLVEGLDFHR      | 1 |
|                                                                                                                                                                                                           |                                     |       |      |      |    |   | 2 | STVASC[330]M[147]HR                      | 2 |
|                                                                                                                                                                                                           |                                     |       |      |      |    |   | 2 | M[147]C[339]DPGMTAFEPEALGNLVEGLDFHR      | 1 |
|                                                                                                                                                                                                           |                                     |       |      |      |    |   | 3 | M[147]C[330]DPGM[147]TAFEPEALGNLVEGLDFHR | 1 |
| 2                                                                                                                                                                                                         | MC[339]DPGM[147]TAFEPEALGNLVEGLDFHR | 1     |      |      |    |   |   |                                          |   |
| 1                                                                                                                                                                                                         | STVASC[339]M[147]HR                 | 1     |      |      |    |   |   |                                          |   |
| 2                                                                                                                                                                                                         | STVASC[339]MHR                      | 1     |      |      |    |   |   |                                          |   |
| 3                                                                                                                                                                                                         | MC[330]DPGMTAFEPEALGNLVEGLDFHR      | 1     |      |      |    |   |   |                                          |   |
| KCC2B_HUMAN (Q13554) Calcium/calmodulin-dependent protein kinase type II beta chain (EC 2.7.11.17) (CaM-kinase II beta chain) (CaM kinase II subunit beta) (CaMK-II subunit beta) [MASS=72726]            | 1.00                                | 15.66 | 0.89 | 0.05 | 4  | 5 | 2 | ITAHEALK                                 | 1 |
|                                                                                                                                                                                                           |                                     |       |      |      |    |   | 3 | NFSVGRQTTAPATMSTAASGTTM[147]GLVEQAKSLLNK | 1 |
|                                                                                                                                                                                                           |                                     |       |      |      |    |   | 3 | IC[339]DPGLTSFEPEALGNLVEGM[147]DFHR      | 1 |
|                                                                                                                                                                                                           |                                     |       |      |      |    |   | 3 | QWPPPC[339]PSPTIPGPLTPSRKQEIK            | 1 |
|                                                                                                                                                                                                           |                                     |       |      |      |    |   | 2 | LC[339]TGHEYAAK                          | 1 |
|                                                                                                                                                                                                           |                                     |       |      |      |    |   | 2 | LC[330]TGHEYAAK                          | 1 |
|                                                                                                                                                                                                           |                                     |       |      |      |    |   | 3 | IC[330]DPGLTSFEPEALGNLVEGM[147]DFHR      | 1 |

|                                                                                                                                                                                                                                                                             |      |       |      |      |    |   |   |                                      |   |
|-----------------------------------------------------------------------------------------------------------------------------------------------------------------------------------------------------------------------------------------------------------------------------|------|-------|------|------|----|---|---|--------------------------------------|---|
| KCC2D_HUMAN (Q13557) Calcium/calmodulin-dependent protein kinase type II delta chain (EC 2.7.11.17) (CaM-kinase II delta chain) (CaM kinase II subunit delta) (CaMK-II subunit delta) [MASS=56297]                                                                          | 1.00 | 5.01  | 0.81 | 0.08 | 2  | 1 | 2 | IC[330]DPGLTAFEPEALGNLVEGM[147]DFHR  | 1 |
|                                                                                                                                                                                                                                                                             |      |       |      |      |    |   | 3 | IC[330]DPGLTAFEPEALGNLVEGM[147]DFHR  | 1 |
| KCMB3_HUMAN (Q9NPA1) Calcium-activated potassium channel subunit beta 3 (Calcium-activated potassium channel, subfamily M subunit beta 3) (Maxi K channel subunit beta 3) (BK channel subunit beta 3) (Slo-beta 3) (K(VCA)beta 3) (Charybdotoxin receptor subu [MASS=31603] | *    | 9.32  | *    | *    | *  | 2 | 3 | HRTAFPASGKK                          | 1 |
|                                                                                                                                                                                                                                                                             |      |       |      |      |    |   | 2 | VPYIEQHQQFKLC[339]IM[147]R           | 1 |
| KCNA4_HUMAN (P22459) Potassium voltage-gated channel subfamily A member 4 (Voltage-gated potassium channel subunit Kv1.4) (HK1) (HPCN2) (HBK4) (HUKII) [MASS=73288]                                                                                                         | 0.00 | 4.13  | 1.26 | 0.00 | 1  | 1 | 3 | SSTSSSLGDKSEYLEMEEGVKESLC[339]AK     | 1 |
|                                                                                                                                                                                                                                                                             |      |       |      |      |    |   | 2 | FC[339]TGLTQIETLFK                   | 4 |
|                                                                                                                                                                                                                                                                             |      |       |      |      |    |   | 2 | FC[330]TGLTQIETLFK                   | 4 |
| KCRB_HUMAN (P12277) Creatine kinase B-type (EC 2.7.3.2) (Creatine kinase B chain) (B-CK) [MASS=42644]                                                                                                                                                                       | 1.00 | 23.62 | 0.76 | 0.09 | 14 | 5 | 1 | FC[339]TGLTQIETLFK                   | 1 |
|                                                                                                                                                                                                                                                                             |      |       |      |      |    |   | 2 | GFC[330]LPPHC[330]SR                 | 3 |
|                                                                                                                                                                                                                                                                             |      |       |      |      |    |   | 2 | LGFSEVELVQMVDGVK                     | 1 |
|                                                                                                                                                                                                                                                                             |      |       |      |      |    |   | 3 | DYEFMWNPHLGYILTC[330]PSNLGTGLRAGVHIK | 1 |
|                                                                                                                                                                                                                                                                             |      |       |      |      |    |   | 3 | TFLVWVNEEDHLRVISMQK                  | 1 |
|                                                                                                                                                                                                                                                                             |      |       |      |      |    |   | 2 | GFC[339]LPPHC[339]SR                 | 2 |
| KCRS_HUMAN (P17540) Creatine kinase, sarcomeric mitochondrial precursor (EC 2.7.3.2) (S-MtCK) (Mib-CK) (Basic-type mitochondrial creatine kinase) [MASS=47520]                                                                                                              | 0.00 | 19.33 | *    | *    | *  | 4 | 2 | IGRSEVELVQIVIDGVNYLVDC[330]EKK       | 1 |
|                                                                                                                                                                                                                                                                             |      |       |      |      |    |   | 2 | LGYILTC[330]PSNLGTGLR                | 1 |
|                                                                                                                                                                                                                                                                             |      |       |      |      |    |   | 2 | LGYILTC[339]PSNLGTGLR                | 2 |
|                                                                                                                                                                                                                                                                             |      |       |      |      |    |   | 3 | MASIFSKLLTGRNASLLFATMGTSVLTTGYLLNR   | 1 |
|                                                                                                                                                                                                                                                                             |      |       |      |      |    |   | 1 | LSKDPR                               | 1 |

|                                                                                                                                                                 |      |      |      |      |    |   |   |   |                                             |   |
|-----------------------------------------------------------------------------------------------------------------------------------------------------------------|------|------|------|------|----|---|---|---|---------------------------------------------|---|
|                                                                                                                                                                 |      |      |      |      |    |   |   | 2 | HNNC[330]M[147]ASHLTPAVYAR                  | 1 |
|                                                                                                                                                                 |      |      |      |      |    |   |   | 2 | SEVELVQLVIDGVNYLIDC[330]ER                  | 1 |
|                                                                                                                                                                 |      |      |      |      |    |   |   | 3 | HNNC[339]M[147]ASHLTPAVYAR                  | 1 |
|                                                                                                                                                                 |      |      |      |      |    |   |   | 2 | HNNC[330]MASHLTPAVYAR                       | 1 |
|                                                                                                                                                                 |      |      |      |      |    |   |   | 2 | HNNC[339]MASHLTPAVYAR                       | 1 |
|                                                                                                                                                                 |      |      |      |      |    |   |   | 3 | HNNC[330]M[147]ASHLTPAVYAR                  | 1 |
|                                                                                                                                                                 |      |      |      |      |    |   |   | 3 | SEVELVQLVIDGVNYLIDC[330]ER                  | 4 |
| KGRU_HUMAN (P12532) Creatine kinase, ubiquitous mitochondrial precursor (EC 2.7.3.2) (U-MtCK) (Mia-CK) (Acidic-type mitochondrial creatine kinase) [MASS=47036] | 1.00 | 8.87 | 1.82 | 0.11 | 22 | 2 | 2 | 2 | SEVELVQLVIDGVNYLIDC[339]ER                  | 4 |
|                                                                                                                                                                 |      |      |      |      |    |   |   | 3 | SEVELVQLVIDGVNYLIDC[339]ER                  | 4 |
|                                                                                                                                                                 |      |      |      |      |    |   |   | 2 | HNNC[339]M[147]ASHLTPAVYAR                  | 4 |
| KE4_HUMAN (Q92504) Zinc transporter SLC39A7 (Solute carrier family 39 member 7) (Histidine-rich membrane protein Ke4) [MASS=50118]                              | 0.00 | 7.04 | 1.45 | 0.00 | 1  | 1 | 3 | 3 | GLGILTTM[147]TVLLHEVPHEVGDFAILVQSGC[339]SKK | 1 |
| KGP1A_HUMAN (Q13976) cGMP-dependent protein kinase 1, alpha isozyme (EC 2.7.11.12) (CGK 1 alpha) (cGKI-alpha) [MASS=76233]                                      | 0.00 | 2.84 | 0.39 | 0.00 | 1  | 1 | 3 | 3 | YLYM[147]LMEAC[330]LGELWTLR                 | 1 |
| KGUA_HUMAN (Q16774) Guanylate kinase (EC 2.7.4.8) (GMP kinase) [MASS=21594]                                                                                     | *    | 6.63 | *    | *    | *  | 1 | 2 | 2 | QRNTEEESLVKR                                | 1 |
|                                                                                                                                                                 |      |      |      |      |    |   |   | 2 | C[330]APMSDLTDLKSLPDTLMKDTAR                | 1 |
|                                                                                                                                                                 |      |      |      |      |    |   |   | 2 | GHEESM[147]TNDK                             | 1 |
| KI67_HUMAN (P46013) Antigen KI-67 [MASS=358743]                                                                                                                 | *    | 3.93 | *    | *    | *  | 6 | 3 | 3 | PKSGGSGHAVAEPASPEQELDQNK                    | 1 |
|                                                                                                                                                                 |      |      |      |      |    |   |   | 2 | SGLQTDYATEKESADGLQGETQLLVSR                 | 1 |
|                                                                                                                                                                 |      |      |      |      |    |   |   | 2 | ELFQTPGPSEESM[147]TDEKTTKIAC[330]K          | 1 |
|                                                                                                                                                                 |      |      |      |      |    |   |   | 3 | M[147]PC[339]ESSPPESADTPTSTR                | 1 |
| KIF1B_HUMAN (O60333) Kinesin-like protein KIF1B (Kip) [MASS=204431]                                                                                             | *    | 1.98 | *    | *    | *  | 2 | 3 | 3 | VTGIYELSLC[339]KMSDTGSPGM[147]QRR           | 1 |
|                                                                                                                                                                 |      |      |      |      |    |   |   | 1 | IMSTPGGEEAIER                               | 1 |
|                                                                                                                                                                 |      |      |      |      |    |   |   | 2 | IMSTPGGEEAIER                               | 1 |

|                                                                                                                                                                                                                                      |      |       |      |      |   |   |   |                                             |   |
|--------------------------------------------------------------------------------------------------------------------------------------------------------------------------------------------------------------------------------------|------|-------|------|------|---|---|---|---------------------------------------------|---|
| KIF1C_HUMAN (O43896) Kinesin-like protein<br>KIF1C [MASS=123071]                                                                                                                                                                     | *    | 5.44  | *    | *    | * | 3 | 2 | PPGPRYPYTTPPRM[147]R                        | 1 |
|                                                                                                                                                                                                                                      |      |       |      |      |   |   | 2 | GSLRVREHPILGPYVQDLSK                        | 1 |
|                                                                                                                                                                                                                                      |      |       |      |      |   |   | 2 | ELLM[147]AQGLSASALEGLKTEEGSVR               | 1 |
| KIRR2_HUMAN (Q6UWL6) Kin of IRRE-like<br>protein 2 precursor (Kin of irregular chiasm-like<br>protein 2) (Nephrin-like protein 3)<br>[MASS=75093]                                                                                    | 0.00 | 3.53  | 0.24 | 0.00 | 1 | 1 | 3 | IVAGVAAATTTLLM[147]VITGVALC[339]C[339]WR    | 1 |
| KKCC2_HUMAN (Q96RR4)<br>Calcium/calmodulin-dependent protein kinase<br>kinase 2 (EC 2.7.11.17) (Calcium/calmodulin-<br>dependent protein kinase kinase beta) (CaM-<br>kinase kinase beta) (CaM-KK beta) (CaMKK<br>beta) [MASS=64731] | *    | 5.44  | *    | *    | * | 1 | 3 | LVEVLDDPNEDHLYMVFELVNQGPVM[147]EVPTLK       | 1 |
| KLDC5_HUMAN (Q9P2K6) Kelch domain-<br>containing protein 5 [MASS=56867]                                                                                                                                                              | *    | 6.93  | *    | *    | * | 2 | 3 | LNNC[330]LEM[147]YRLAQVYGLPDLQEAC[339]LR    | 1 |
|                                                                                                                                                                                                                                      |      |       |      |      |   |   | 2 | M[147]SAEEM[147]VQIR                        | 2 |
| KLF11_HUMAN (O14901) Krueppel-like factor<br>11 (Transforming growth factor-beta-inducible<br>early growth response protein 2) (TGFB-<br>inducible early growth response protein 2)<br>(TIEG-2) [MASS=55139]                         | *    | 5.27  | *    | *    | * | 1 | 3 | AKGTSVIRHTGESPAAC[330]FPTIQTPDC[339]R       | 1 |
| KLH17_HUMAN (Q6TDP4) Kelch-like protein<br>17 (Actinfilin) [MASS=69874]                                                                                                                                                              | *    | 6.07  | *    | *    | * | 2 | 3 | EIRAHKVVLASC[330]SPYFHAM[147]FTNEM[147]SESR | 1 |
|                                                                                                                                                                                                                                      |      |       |      |      |   |   | 3 | M[147]QPRSERPAGR                            | 1 |
| KLH20_HUMAN (Q9Y2M5) Kelch-like protein<br>20 (Kelch-like ECT2-interacting protein) (Kelch-<br>like protein X) [MASS=67541]                                                                                                          | 0.00 | 11.42 | 1.11 | 0.00 | 1 | 3 | 3 | C[339]TNIRPGETGM[147]DVTSRC[339]TLGDPNK     | 1 |
|                                                                                                                                                                                                                                      |      |       |      |      |   |   | 3 | PGETGMDVTSRC[339]TLGDPNKLPEGVPQPAR          | 1 |
|                                                                                                                                                                                                                                      |      |       |      |      |   |   | 3 | YDPQTNEWRMVASMSK                            | 1 |
| KLH23_HUMAN (Q8NBE8) Kelch-like protein<br>23 [MASS=63923]                                                                                                                                                                           | *    | 1.43  | *    | *    | * | 1 | 1 | FLFILSRK                                    | 1 |
| KLK13_HUMAN (Q9UKR3) Kallikrein-13<br>precursor (EC 3.4.21.-) (Kallikrein-like protein<br>4) (KLK-L4) [MASS=30570]                                                                                                                   | *    | 5.05  | *    | *    | * | 1 | 3 | EGLKVYLKGKHALGR                             | 1 |
| KLKB1_HUMAN (P03952) Plasma kallikrein<br>precursor (EC 3.4.21.34) (Plasma prekallikrein)<br>(Kininogenin) (Fletcher factor) [Contains:<br>Plasma kallikrein heavy chain; Plasma<br>kallikrein light chain] [MASS=71369]             | 0.00 | 3.45  | 0.53 | 0.00 | 1 | 1 | 3 | GVDMRGVNFNVSQVSSVEEC[330]QK                 | 1 |

|                                                                                                                                                                                                                       |      |       |      |      |   |   |   |                                               |   |
|-----------------------------------------------------------------------------------------------------------------------------------------------------------------------------------------------------------------------|------|-------|------|------|---|---|---|-----------------------------------------------|---|
| KNTC1_HUMAN (P50748) Kinetochore-associated protein 1 (Rough deal homolog) (hRod) (HsROD) (Rod) [MASS=250747]                                                                                                         | *    | 3.49  | *    | *    | * | 3 | 2 | IQNSSGTDYPDIHAAAKEIAEVNEINLEK                 | 1 |
|                                                                                                                                                                                                                       |      |       |      |      |   |   | 2 | SGTEAVLIAHKLNTEEYLRVIGK                       | 1 |
|                                                                                                                                                                                                                       |      |       |      |      |   |   | 3 | LSEDSVSVLVLRC[330]LTEALPENRLSR                | 1 |
| KPCA_HUMAN (P17252) Protein kinase C alpha type (EC 2.7.11.13) (PKC-alpha) (PKC-A) [MASS=76632]                                                                                                                       | 0.77 | 4.32  | 1.06 | 0.00 | 1 | 2 | 2 | C[339]DTC[339]DM[147]NVHK                     | 1 |
|                                                                                                                                                                                                                       |      |       |      |      |   |   | 3 | TTRNDFM[147]GSLSFVSELM[147]K                  | 1 |
| KPCT_HUMAN (Q04759) Protein kinase C theta type (EC 2.7.11.13) (nPKC-theta) [MASS=81864]                                                                                                                              | 0.00 | 12.32 | 2.43 | 0.00 | 1 | 4 | 3 | NVDLISETTVELYSLAERC[339]R                     | 1 |
|                                                                                                                                                                                                                       |      |       |      |      |   |   | 3 | REPQGISWESPLDEVK                              | 1 |
|                                                                                                                                                                                                                       |      |       |      |      |   |   | 3 | PTMYPPWDSTFDAHINKGRVM[147]QIIVK               | 1 |
|                                                                                                                                                                                                                       |      |       |      |      |   |   | 3 | ENLFFVMEYLNNGDLMYHIQSC[339]HK                 | 1 |
| KPYM_HUMAN (P14618) Pyruvate kinase isozymes M1/M2 (EC 2.7.1.40) (Pyruvate kinase muscle isozyme) (Cytosolic thyroid hormone-binding protein) (CTHBP) (THBP1) [MASS=57805]                                            | 1.00 | 5.66  | 0.74 | 0.09 | 5 | 2 | 2 | NTGIIC[339]TIGPASR                            | 1 |
|                                                                                                                                                                                                                       |      |       |      |      |   |   | 2 | NTGIIC[330]TIGPASR                            | 1 |
|                                                                                                                                                                                                                       |      |       |      |      |   |   | 2 | AGKPVIC[339]ATQM[147]LESM[147]IK              | 1 |
|                                                                                                                                                                                                                       |      |       |      |      |   |   | 2 | AGKPVIC[330]ATQM[147]LESM[147]IK              | 2 |
| KR106_HUMAN (P60371) Keratin-associated protein 10-6 (Keratin-associated protein 10.6) (High sulfur keratin-associated protein 10.6) (Keratin-associated protein 18-6) (Keratin-associated protein 18.6) [MASS=36782] | 0.00 | 4.93  | 3.95 | 0.00 | 1 | 1 | 3 | M[147]AASTMSVC[339]SSDLSYGSR                  | 1 |
| KR134_HUMAN (Q3LI77) Keratin-associated protein 13-4 [MASS=17755]                                                                                                                                                     | 0.00 | 8.75  | 0.79 | 0.00 | 1 | 1 | 2 | YGGC[330]GFPSLSYGSR                           | 1 |
| KREM1_HUMAN (Q96MU8) Kremen protein 1 precursor (Kringle-containing protein marking the eye and the nose) (Kringle domain-containing transmembrane protein 1) (Dickkopf receptor) [MASS=51898]                        | 0.00 | 3.16  | 0.81 | 0.00 | 1 | 1 | 3 | TSNKLTIQTC[330]ISFC[330]R                     | 1 |
| KRHB2_HUMAN (Q9NSB4) Keratin, type II cuticular Hb2 (Hair keratin, type II Hb2) [MASS=56683]                                                                                                                          | *    | 5.85  | *    | *    | * | 1 | 3 | SNGGC[339]SIVGTGELYVPC[339]EPQGLLSC[330]GSGRK | 1 |
| KRHB3_HUMAN (P78385) Keratin, type II cuticular Hb3 (Hair keratin, type II Hb3) [MASS=54214]                                                                                                                          | 0.00 | 3.45  | 0.37 | 0.00 | 1 | 1 | 2 | LDNSRDLNM[147]DC[339]MVAEIK                   | 1 |

|                                                                                                                                                                                                                                                      |      |       |      |      |   |   |   |                                          |   |
|------------------------------------------------------------------------------------------------------------------------------------------------------------------------------------------------------------------------------------------------------|------|-------|------|------|---|---|---|------------------------------------------|---|
| KS6A2_HUMAN (Q15349) Ribosomal protein S6 kinase alpha-2 (EC 2.7.11.1) (S6K-alpha 2) (90 kDa ribosomal protein S6 kinase 2) (p90-RSK 2) (Ribosomal S6 kinase 3) (RSK-3) (pp90RSK3) (MAP kinase-activated protein kinase 1c) (MAPKAPK1C) [MASS=83238] | *    | 2.05  | *    | *    | * | 1 | 2 | ATDTEYAVKIIDKSK                          | 1 |
| KSR2_HUMAN (Q6VAB6) Kinase suppressor of ras-2 (hKSR2) [MASS=93585]                                                                                                                                                                                  | 0.00 | 11.82 | 4.86 | 0.00 | 1 | 4 | 2 | SKPLNLKIHSSVGSC[330]ENIPSQQR             | 1 |
|                                                                                                                                                                                                                                                      |      |       |      |      |   |   | 3 | EISDILLFC[339]WAFEQEERPTFTK              | 1 |
|                                                                                                                                                                                                                                                      |      |       |      |      |   |   | 3 | EEC[330]ARLNASLSC[339]LRNVHM[147]SGGNLSK | 1 |
| L1CAM_HUMAN (P32004) Neural cell adhesion molecule L1 precursor (N-CAM L1) (CD171 antigen) [MASS=140002]                                                                                                                                             | 1.00 | 4.93  | 0.72 | 0.17 | 2 | 3 | 2 | HIHKDHVVVPANTTSVILSGLR                   | 1 |
|                                                                                                                                                                                                                                                      |      |       |      |      |   |   | 2 | C[330]EASGKPEVQFR                        | 1 |
|                                                                                                                                                                                                                                                      |      |       |      |      |   |   | 3 | ETVKPVEVEEGESVVLPC[330]NPPPSAEPLR        | 1 |
| LAC_HUMAN (P01842) Ig lambda chain C regions [MASS=11236]                                                                                                                                                                                            | 0.89 | 14.29 | 1.16 | 0.00 | 1 | 1 | 2 | SYSC[339]QVTHEGSTVEK                     | 1 |
| LAMP1_HUMAN (P11279) Lysosome-associated membrane glycoprotein 1 precursor (LAMP-1) (CD107a antigen) [MASS=44773]                                                                                                                                    | 0.00 | 6.25  | 0.70 | 0.00 | 1 | 2 | 2 | VTKAFSVNIFKVVVQAFK                       | 1 |
|                                                                                                                                                                                                                                                      |      |       |      |      |   |   | 2 | C[330]NAEEHVR                            | 1 |
| LANC1_HUMAN (O43813) LanC-like protein 1 (40 kDa erythrocyte membrane protein) (p40) [MASS=45283]                                                                                                                                                    | 1.00 | 5.51  | 1.60 | 0.00 | 2 | 1 | 2 | IPQSHIQQIC[339]ETILTSGENLAR              | 1 |
|                                                                                                                                                                                                                                                      |      |       |      |      |   |   | 2 | IPQSHIQQIC[330]ETILTSGENLAR              | 1 |
| LANC2_HUMAN (Q9NS86) LanC-like protein 2 (Testis-specific adriamycin sensitivity protein) [MASS=50854]                                                                                                                                               | 0.00 | 10.00 | 2.77 | 0.00 | 1 | 2 | 3 | GLLRKGYGIC[330]HG TAGNGYSFSLYR           | 1 |
|                                                                                                                                                                                                                                                      |      |       |      |      |   |   | 2 | LVHWC[339]HGAPGVIHM[147]LMQAYK           | 1 |
| LAT2_HUMAN (Q9UHI5) Large neutral amino acids transporter small subunit 2 (L-type amino acid transporter 2) (hLAT2) [MASS=58381]                                                                                                                     | 0.76 | 2.80  | 0.49 | 0.00 | 1 | 1 | 2 | C[330]FSDFIELLTLVSQK                     | 1 |
| LATS1_HUMAN (O95835) Serine/threonine-protein kinase LATS1 (EC 2.7.11.1) (Large tumor suppressor homolog 1) (WARTS protein kinase) (h-warts) [MASS=126869]                                                                                           | *    | 6.28  | *    | *    | * | 4 | 2 | EQMAAAAARPINASMK                         | 1 |
|                                                                                                                                                                                                                                                      |      |       |      |      |   |   | 3 | QVRNPPKFGTHHK                            | 1 |
|                                                                                                                                                                                                                                                      |      |       |      |      |   |   | 2 | DNLYFVM[147]DYIPGGDMMSLLIR               | 1 |
|                                                                                                                                                                                                                                                      |      |       |      |      |   |   | 2 | KQLENEM[147]MRVGLSQDAQDQMR               | 1 |
| LBC_HUMAN (Q12802) LBC oncogene (P47) (Lymphoid blast crisis oncogene) [MASS=49052]                                                                                                                                                                  | 0.00 | 3.77  | 0.32 | 0.00 | 1 | 1 | 3 | LGIPPEC[330]ILLVTQRITK                   | 1 |
| LBH2_HUMAN (P08910) Abhydrolase domain-containing protein 2 (Protein PHPS1-2) [MASS=48315]                                                                                                                                                           | 0.00 | 7.29  | 1.60 | 0.00 | 1 | 2 | 2 | EYEEESC[339]MR                           | 1 |
|                                                                                                                                                                                                                                                      |      |       |      |      |   |   | 2 | SPTAPPDLYFQDSGLSRFLK                     | 1 |



|                                                                                                                                                                                                                                                        |      |       |      |      |   |   |                                                                                                        |                                                                     |        |
|--------------------------------------------------------------------------------------------------------------------------------------------------------------------------------------------------------------------------------------------------------|------|-------|------|------|---|---|--------------------------------------------------------------------------------------------------------|---------------------------------------------------------------------|--------|
| LCB2_HUMAN (O15270) Serine palmitoyltransferase 2 (EC 2.3.1.50) (Long chain base biosynthesis protein 2) (LCB 2) (Serine-palmitoyl-CoA transferase 2) (SPT 2) [MASS=62924]                                                                             | 0.00 | 7.65  | 1.71 | 0.00 | 1 | 2 | 3                                                                                                      | EM[147]GFIIYGNEDSPVVPLM[147]LYM[147]PAK<br>GC[339]LILSDELNHASLVLGAR | 1<br>1 |
| LCMT2_HUMAN (O60294) Leucine carboxyl methyltransferase 2 (EC 2.1.1.-) (p21WAF1/CIP1 promoter-interacting protein) [MASS=75601]                                                                                                                        | 0.00 | 9.04  | 6.65 | 0.00 | 1 | 3 | 1 TAGRLAR<br>3 VLVLGGRLSPVSPALGVLQLHFFKSEDNNTEDLK<br>3 AVRHC[339]VRAFLEQIGAPQAALR                      | 1<br>1<br>1                                                         |        |
| LDB1_HUMAN (Q86U70) LIM domain-binding protein 1 (Carboxyl-terminal LIM domain-binding protein 2) (CLIM-2) (LIM domain-binding factor CLIM2) [MASS=42809]                                                                                              | 0.00 | 12.53 | 0.99 | 0.00 | 1 | 2 | 3 LYLEFMFDDMMRIKTWHFSIR<br>3 C[339]GLSNSTLNYLRLC[339]VILEPM[147]QELMSR                                 | 1<br>1                                                              |        |
| LDH6A_HUMAN (Q6ZMR3) L-lactate dehydrogenase A-like 6A (EC 1.1.1.27) [MASS=36507]                                                                                                                                                                      | 0.00 | 11.45 | *    | *    | * | 3 | 2 VIGSGC[339]NLDSAR<br>3 LKGETM[147]DLQHGSPPFM[147]K<br>2 VIGSGC[330]NLDSAR<br>1 DLNPDIGTDK            | 1<br>1<br>1<br>1                                                    |        |
| LDHA_HUMAN (P00338) L-lactate dehydrogenase A chain (EC 1.1.1.27) (LDH-A) (LDH muscle subunit) (LDH-M) (Proliferation-inducing gene 19 protein) (NY-REN-59 antigen) [MASS=36557]                                                                       | 1.00 | 8.16  | 0.52 | 0.08 | 2 | 1 | 2 GLYGIKDDVFLSVPC[330]ILGQNGISDLVK<br>3 GLYGIKDDVFLSVPC[330]ILGQNGISDLVK                               | 1<br>1                                                              |        |
| LDHB_HUMAN (P07195) L-lactate dehydrogenase B chain (EC 1.1.1.27) (LDH-B) (LDH heart subunit) (LDH-H) (NY-REN-46 antigen) [MASS=36507]                                                                                                                 | 1.00 | 11.71 | 0.61 | 0.15 | 4 | 2 | 2 GM[147]YGIENEVFLSLPC[339]ILNAR<br>2 LKGEM[147]M[147]DLQHGSFLQTPK<br>2 GM[147]YGIENEVFLSLPC[330]ILNAR | 1<br>1<br>2                                                         |        |
| LDHC_HUMAN                                                                                                                                                                                                                                             | 0.00 | 4.23  | *    | *    | * | 1 | 2 GMYGIENEVFLSLPC[339]ILNAR<br>2 SAETLWNIQKDLIF                                                        | 1<br>1                                                              |        |
| LEF1_HUMAN (Q9UJU2) Lymphoid enhancer-binding factor 1 (LEF-1) (T cell-specific transcription factor 1-alpha) (TCF1-alpha) [MASS=44200]                                                                                                                | *    | 4.76  | *    | *    | * | 1 | 2 EKLQESASGTGPRM[147]TAAYI                                                                             | 1                                                                   |        |
| LEG1_HUMAN (P09382) Galectin-1 (Lectin galactoside-binding soluble 1) (Beta-galactoside-binding lectin L-14-I) (Lactose-binding lectin 1) (S-Lac lectin 1) (Galaptin) (14 kDa lectin) (HPL) (HBL) (Putative MAPK-activating protein MP12) [MASS=14584] | 0.98 | 27.61 | 0.68 | 0.00 | 1 | 2 | 2 FPNRLNLEAINYMAADGDFKIK<br>2 FNAHGDANTIVC[330]NSK                                                     | 1<br>1                                                              |        |

|                                                                                                                                                                                                                          |      |       |      |      |   |   |   |                                                                                                              |                  |
|--------------------------------------------------------------------------------------------------------------------------------------------------------------------------------------------------------------------------|------|-------|------|------|---|---|---|--------------------------------------------------------------------------------------------------------------|------------------|
|                                                                                                                                                                                                                          |      |       |      |      |   |   | 3 | TIIKGYVPPTGK                                                                                                 | 5                |
| LEG4_HUMAN (P56470) Galectin-4 (Lactose-binding lectin 4) (L-36 lactose-binding protein) (L36LBP) (Antigen NY-CO-27) [MASS=35941]                                                                                        | *    | 6.19  | *    | *    | * | 2 |   |                                                                                                              |                  |
|                                                                                                                                                                                                                          |      |       |      |      |   |   | 2 | KRSMPFK                                                                                                      | 1                |
| LETM1_HUMAN (O95202) Leucine zipper-EF-hand-containing transmembrane protein 1, mitochondrial precursor [MASS=83354]                                                                                                     | 0.99 | 5.82  | 1.40 | 0.06 | 2 | 2 | 2 | PQLVALC[330]KLELQSIGTNNFLR<br>LFEDELTDNLTRPQLVALC[339]K                                                      | 1<br>2           |
| LGI1_HUMAN (O95970) Leucine-rich glioma-inactivated protein 1 precursor (Epitempin-1) [MASS=63818]                                                                                                                       | 0.00 | 8.62  | 0.20 | 0.00 | 1 | 3 | 2 | TPQTLRTPHLILSSSSQR<br>DFDC[330]IITEFAK<br>FQELNVQAPRSFTHVSINK                                                | 1<br>1<br>1      |
| LGI4_HUMAN (Q8N135) Leucine-rich repeat LGI family member 4 precursor (Leucine-rich glioma-inactivated protein 4) (LGI1-like protein 3) [MASS=59141]                                                                     | *    | 4.47  | *    | *    | * | 1 | 3 | YIGDSM[147]VM[147]RWDGSMFRLQLPSR                                                                             | 1                |
| LHX3_HUMAN (Q9UBR4) LIM/homeobox protein Lhx3 [MASS=43358]                                                                                                                                                               | *    | 6.30  | *    | *    | * | 1 | 2 | PSGALGNFSLEHGGLAGPEQYREL                                                                                     | 1                |
| LIPA3_HUMAN (O75145) Liprin-alpha-3 (Protein tyrosine phosphatase receptor type f polypeptide-interacting protein alpha-3) (PTPRF-interacting protein alpha-3) [MASS=133495]                                             | *    | 2.43  | *    | *    | * | 2 | 2 | VMGWVSLGLK<br>SYFM[147]ESLVDARM[147]LDHLNK                                                                   | 1<br>1           |
| LIPB2_HUMAN (Q8ND30) Liprin-beta-2 (Protein tyrosine phosphatase receptor type f polypeptide-interacting protein-binding protein 2) (PTPRF-interacting protein-binding protein 2) [MASS=98444]                           | *    | 8.33  | *    | *    | * | 4 | 3 | AQKKLSC[330]SLEDLR<br>DLEVC[330]LEGHQVKNAAEEM[147]LQQELLSR<br>TQSGNFYDTLGM[147]AEFRR<br>LSC[330]SLEDLRSESVDK | 1<br>1<br>1<br>1 |
| LIS1_HUMAN (P43034) Platelet-activating factor acetylhydrolase IB subunit alpha (PAF acetylhydrolase 45 kDa subunit) (PAF-AH 45 kDa subunit) (PAF-AH alpha) (PAFAH alpha) (Lissencephaly-1 protein) (LIS-1) [MASS=46506] | 0.00 | 11.49 | 1.04 | 0.00 | 1 | 2 | 3 | MWDVSTGMC[339]LM[147]TLVGHDNWVR<br>DKTIKM[147]WDVSTGMC[339]LMTLVGHDNWVR                                      | 1<br>1           |
| LMO4_HUMAN (P61968) LIM domain transcription factor LMO4 (LIM domain only protein 4) (LMO-4) (Breast tumor autoantigen) [MASS=17994]                                                                                     | *    | 24.85 | *    | *    | * | 2 | 2 | C[339]SC[330]C[339]QAQLGDIGTSC[330]YTK<br>LFGNSGAC[330]SAC[339]GQSIPASELVM[147]R                             | 1<br>1           |

|                                                                                                                                                                                     |      |       |      |      |   |   |   |                                                     |   |
|-------------------------------------------------------------------------------------------------------------------------------------------------------------------------------------|------|-------|------|------|---|---|---|-----------------------------------------------------|---|
| LPPRC_HUMAN (P42704) 130 kDa leucine-rich protein (LRP 130) (GP130) (Leucine-rich PPR motif-containing protein) [MASS=145200]                                                       | 0.99 | 7.07  | 1.05 | 0.00 | 1 | 4 | 3 | GPTEAVGNFLYNLIDSMDSSEVQAKEEHLR                      | 1 |
|                                                                                                                                                                                     |      |       |      |      |   |   | 3 | AKYESDMVTGGYAALINLC[339]C[339]RHDK                  | 1 |
|                                                                                                                                                                                     |      |       |      |      |   |   | 2 | QLILVLC[339]SEENM[147]QKALELK                       | 1 |
|                                                                                                                                                                                     |      |       |      |      |   |   | 2 | C[339]GAIAEQTPILLFLLR                               | 1 |
| LRP16_HUMAN (Q9BQ69) Protein LRP16 [MASS=35505]                                                                                                                                     | 0.00 | 11.08 | 1.78 | 0.00 | 1 | 2 | 3 | LEVDAIVNAANSLLGGGGVDGC[339]IHR                      | 1 |
|                                                                                                                                                                                     |      |       |      |      |   |   | 2 | SRLPHYFPVA                                          | 1 |
| LRP1B_HUMAN (Q9NZR2) Low-density lipoprotein receptor-related protein 1B precursor (Low-density lipoprotein receptor-related protein-deleted in tumor) (LRP-DIT) [MASS=515496]      | *    | 2.89  | *    | *    | * | 7 | 3 | GMMYWTVVGDHSHIEEAM[147]DGTLRRLVQK                   | 1 |
|                                                                                                                                                                                     |      |       |      |      |   |   | 3 | RGHKNDATETITM[147]R                                 | 1 |
|                                                                                                                                                                                     |      |       |      |      |   |   | 3 | KC[330]IPM[147]DLQC[339]DRLDDC[330]GDGSDEQGC[339]R  | 1 |
|                                                                                                                                                                                     |      |       |      |      |   |   | 2 | NKTSGVVHMKVYDK                                      | 1 |
|                                                                                                                                                                                     |      |       |      |      |   |   | 2 | C[339]PLNHAC[330]LGTNK                              | 1 |
|                                                                                                                                                                                     |      |       |      |      |   |   | 3 | KC[330]IPMDLQC[330]DRLDDC[339]GDGSDEQGC[330]R       | 1 |
|                                                                                                                                                                                     |      |       |      |      |   |   | 3 | DEFHC[330]DSSC[339]SWNQFAC[339]SAQK                 | 1 |
| LRP2_HUMAN (P98164) Low-density lipoprotein receptor-related protein 2 precursor (Megalin) (Glycoprotein 330) (gp330) [MASS=521928]                                                 | *    | 2.34  | *    | *    | * | 5 | 2 | PGKRC[339]AAEGSSPLLLLDPDNR                          | 1 |
|                                                                                                                                                                                     |      |       |      |      |   |   | 2 | DNDC[330]GDMSDEKDC[339]PTQPFRR                      | 1 |
|                                                                                                                                                                                     |      |       |      |      |   |   | 3 | C[339]PSGYTGKYC[330]EMAFSK                          | 1 |
|                                                                                                                                                                                     |      |       |      |      |   |   | 3 | M[147]ILVHQLSHPWGIHVHDSFLYTTDEQYEVIER               | 1 |
|                                                                                                                                                                                     |      |       |      |      |   |   | 3 | ANKYDGGSGIAMTTNLLSQPR                               | 1 |
| LRRC2_HUMAN (Q9BYS8) Leucine-rich repeat containing protein 2 [MASS=42943]                                                                                                          | 0.00 | 5.39  | 0.23 | 0.00 | 1 | 1 | 3 | LDC[330]SGNLELMELPFELSNLK                           | 1 |
| LRRC7_HUMAN (Q96NW7) Leucine-rich repeat-containing protein 7 (Protein LAP1) (Densin-180) [MASS=172580]                                                                             | *    | 2.02  | *    | *    | * | 1 | 2 | MLGPEHGM[147]SSM[147]SRSQSVPLDDEMLTYGSSK            | 1 |
|                                                                                                                                                                                     |      |       |      |      |   |   | 1 | STSLKVK                                             | 7 |
| LRRN3_HUMAN (Q9H3W5) Leucine-rich repeats neuronal protein 3 precursor (Neuronal leucine-rich repeat protein 3) (NLRR-3) [MASS=79424]                                               | *    | 0.99  | *    | *    | * | 1 |   |                                                     |   |
| LRSM1_HUMAN (Q6UWE0) Ubiquitin ligase protein LRSAM1 (EC 6.3.2.-) (Leucine-rich repeat and sterile alpha motif-containing protein 1) (Tsg101-associated ligase) (hTAL) [MASS=83593] | 0.00 | 1.94  | 1.43 | 0.00 | 1 | 1 | 3 | TC[339]PLC[339]RQDIAQRLR                            | 1 |
| LRTM3_HUMAN (Q86VH5) Leucine-rich repeat transmembrane neuronal protein 3 precursor [MASS=65896]                                                                                    | 0.00 | 11.36 | 6.29 | 0.00 | 1 | 2 | 3 | C[339]EGKM[147]VYC[339]ESQKLQEIPISSISAGC[330]LGLSLR | 1 |
|                                                                                                                                                                                     |      |       |      |      |   |   | 3 | MGFNVIRLLSGSAVALVIAPTPLLTM[147]LSSAERGC[339]PK      | 1 |
|                                                                                                                                                                                     |      |       |      |      |   |   | 3 | M[147]GFNVIRLLSGSAVALVIAPTPLLTM[147]LSSAERGC[339]PK | 2 |

|                                                                                                                                                                         |      |       |      |      |   |   |   |                                            |   |
|-------------------------------------------------------------------------------------------------------------------------------------------------------------------------|------|-------|------|------|---|---|---|--------------------------------------------|---|
| LSAMP_HUMAN (Q13449) Limbic system-associated membrane protein precursor (LSAMP) [MASS=37308]                                                                           | 1.00 | 15.38 | 0.56 | 0.50 | 3 | 3 | 3 | IQKVDVYDEGSYTC[330]SVQQTQHEPK              | 1 |
|                                                                                                                                                                         |      |       |      |      |   |   | 2 | VDVYDEGSYTC[330]SVQQTQHEPK                 | 1 |
|                                                                                                                                                                         |      |       |      |      |   |   | 2 | EQSGKYEC[330]K                             | 1 |
| LSP1_HUMAN (P33241) Lymphocyte-specific protein 1 (Protein pp52) (52 kDa phosphoprotein) (Lymphocyte-specific antigen WP34) (47 kDa actin-binding protein) [MASS=37191] | 0.00 | 4.42  | 0.41 | 0.00 | 1 | 1 | 2 | TPSC[339]KDIVAGDM[147]SKK                  | 1 |
| LTBP3_HUMAN (Q9NS15) Latent-transforming growth factor beta-binding protein 3 precursor (LTBP-3) [MASS=139246]                                                          | *    | 3.84  | *    | *    | * | 2 | 3 | DC[339]QLPESPAERAPERR                      | 1 |
|                                                                                                                                                                         |      |       |      |      |   |   | 2 | GAAGGLAPEM[147]RGAGAAGLLALLLLLLLLLLLGLGGR  | 1 |
| LTK_HUMAN (P29376) Leukocyte tyrosine kinase receptor precursor (EC 2.7.10.1) (Protein tyrosine kinase 1) [MASS=91653]                                                  | *    | 2.20  | *    | *    | * | 1 | 2 | SLEC[330]LRPPQPQELSPEKLK                   | 1 |
| LV1E_HUMAN (P01703) Ig lambda chain V-I region NEWM [MASS=10904]                                                                                                        | *    | 13.59 | *    | *    | * | 1 | 3 | LLIFHNNARFSVSK                             | 1 |
| LV4B_HUMAN (P01716) Ig lambda chain V-IV region X [MASS=11334]                                                                                                          | 0.00 | 23.58 | 0.15 | 0.00 | 1 | 1 | 2 | YDLTQPPSVSVSPGQTASITC[330]SGDK             | 1 |
| LY6H_HUMAN (O94772) Lymphocyte antigen Ly-6H precursor [MASS=14669]                                                                                                     | 0.00 | 7.86  | 0.71 | 0.00 | 1 | 1 | 2 | M[147]C[330]ASSC[330]DFVKR                 | 1 |
| LY96_HUMAN (Q9Y6Y9) Lymphocyte antigen 96 precursor (MD-2 protein) (ESOP-1) [MASS=18446]                                                                                | 0.23 | 23.75 | 0.58 | 0.00 | 1 | 2 | 2 | QYWVC[330]NSSDASISYTYC[330]DK              | 1 |
|                                                                                                                                                                         |      |       |      |      |   |   | 2 | QLYFNLYITVNTM[147]NLPKRK                   | 1 |
| LYAR_HUMAN (Q9NX58) Cell growth-regulating nucleolar protein [MASS=43614]                                                                                               | *    | 6.07  | *    | *    | * | 2 | 3 | AILKQAPDNEITIK                             | 1 |
|                                                                                                                                                                         |      |       |      |      |   |   | 2 | KAKFQNWWMK                                 | 1 |
|                                                                                                                                                                         |      |       |      |      |   |   | 3 | QK GKASVQAINVFHPATYFGM[147]DVSAVEDPVQR     | 1 |
| LYST_HUMAN (Q99698) Lysosomal-trafficking regulator (Beige homolog) [MASS=429136]                                                                                       | *    | 2.45  | *    | *    | * | 4 | 3 | EDAFISSC[339]ESAKTVC[339]EMEAVLSAQVSVSDVPK | 1 |
|                                                                                                                                                                         |      |       |      |      |   |   | 2 | LTVLAVNR                                   | 1 |
|                                                                                                                                                                         |      |       |      |      |   |   | 2 | TVLHLLSVDVSTAEM[147]M[147]PENLR            | 1 |
| LYZL4_HUMAN (Q96KX0) Lysozyme-like protein 4 precursor [MASS=16433]                                                                                                     | *    | 24.66 | *    | *    | * | 2 | 2 | C[330]HMSC[330]SALLNPNLEK                  | 1 |
|                                                                                                                                                                         |      |       |      |      |   |   | 3 | C[330]HM[147]SC[330]SALLNPNLEKTIKC[330]AK  | 1 |
| M2OM_HUMAN (Q02978) Mitochondrial 2-oxoglutarate/malate carrier protein (OGCP) (Solute carrier family 25 member 11) [MASS=33930]                                        | 0.97 | 11.18 | 1.79 | 0.01 | 2 | 2 | 2 | GC[339]IPTM[147]AR                         | 2 |
|                                                                                                                                                                         |      |       |      |      |   |   | 3 | SVKFLFGGLAGM[147]GATVFVQPLDLVKNR           | 1 |

|                                                                                                                                                                                                               |      |       |      |      |   |   |                                 |                                                                                                                                                                |                                 |
|---------------------------------------------------------------------------------------------------------------------------------------------------------------------------------------------------------------|------|-------|------|------|---|---|---------------------------------|----------------------------------------------------------------------------------------------------------------------------------------------------------------|---------------------------------|
| M3K13_HUMAN (O43283) Mitogen-activated protein kinase kinase kinase 13 (EC 2.7.11.25) (Mixed lineage kinase) (MLK) (Leucine zipper-bearing kinase) [MASS=108295]                                              | *    | 10.25 | *    | *    | * | 4 | 3<br>2<br>2<br>2                | LAEKLLDLLSQTPEIPIDISSHSDGLSDKEC[339]AVR<br>ANNLYMELSAIMLQLEM<br>LERANNLYMELSAIMLQLEM[147]R<br>PDLLRSEGIPTTEVAPTASPLSGSPK                                       | 1<br>1<br>1<br>1                |
| M3K14_HUMAN (Q99558) Mitogen-activated protein kinase kinase kinase 14 (EC 2.7.11.25) (NF-kappa beta-inducing kinase) (Serine/threonine-protein kinase NIK) (HsNIK) [MASS=104041]                             | 0.00 | 7.07  | 2.19 | 0.00 | 1 | 4 | 2<br>1<br>3<br>2                | PTDTPSYFNGVKVQIQLNGEHLHIR<br>HGQLENRP<br>AEELMAC[339]AGLTSPRIVPLYGAVR<br>TWAARGSRSR                                                                            | 1<br>1<br>1<br>1                |
| MACF1_HUMAN (Q9UPN3) Microtubule-actin crosslinking factor 1, isoforms 1/2/3/5 (Actin cross-linking family protein 7) (Macrophin-1) (Trabeculin-alpha) (620 kDa actin-binding protein) (ABP620) [MASS=620414] | 0.00 | 2.01  | 1.16 | 0.00 | 1 | 7 | 2<br>2<br>2<br>2<br>2<br>2<br>3 | M[147]FQKEQVDPLQMK<br>AREGLDKLVSDANEQYK<br>LYEGKMSQNFHTSYAETLGK<br>EAQTLC[330]DELSVLIGEYQYK<br>WHVVSSKM[147]EER<br>TGSLEEM[147]TQRLREFQESFK<br>LIIEM[147]LEREK | 1<br>1<br>1<br>1<br>1<br>1<br>1 |
| MACF4_HUMAN (Q96PK2) Microtubule-actin crosslinking factor 1, isoform 4 [MASS=670146]                                                                                                                         | 0.00 | 0.62  | *    | *    | * | 2 | 2<br>2                          | ALFLPATTEILSWKK<br>DDHKESQEAQNIAGGSM[147]M[147]M[147]SEK                                                                                                       | 1<br>1                          |
| MAOM_HUMAN (P23368) NAD-dependent malic enzyme, mitochondrial precursor (EC 1.1.1.38) (NAD-ME) (Malic enzyme 2) [MASS=65443]                                                                                  | 0.35 | 9.93  | 0.87 | 0.00 | 1 | 2 | 2<br>3                          | LYPPLANIQEVSNIAIKVTEYLYANKM[147]AFR<br>C[339]LPVC[339]IDVGTDNIALLKDPFYM[147]GLYQK                                                                              | 1<br>1                          |
| MAON_HUMAN (Q16798) NADP-dependent malic enzyme, mitochondrial precursor (EC 1.1.1.40) (NADP-ME) (Malic enzyme 3) [MASS=67054]                                                                                | 1.00 | 8.61  | 1.71 | 0.01 | 2 | 2 | 2<br>2<br>3                     | FGINC[330]LIQFEDFANANAFR<br>FGINC[339]LIQFEDFANANAFR<br>LSNHVVFVQGAGEAAMGIAHLLVM[147]ALEKEGVPK                                                                 | 1<br>1<br>1                     |
| MAP1A_HUMAN (P78559) Microtubule-associated protein 1A (MAP 1A) (Proliferation-related protein p80) [Contains: MAP1 light chain LC2] [MASS=306529]                                                            | 0.96 | 1.21  | 0.57 | 0.00 | 1 | 2 | 3<br>2                          | SXTSQVTPAEKDGHSPPMSK<br>SIEEAC[330]LTLQHLNR                                                                                                                    | 1<br>1                          |
| MAP2_HUMAN (P11137) Microtubule-associated protein 2 (MAP 2) (MAP-2) [MASS=199538]                                                                                                                            | 1.00 | 4.32  | 1.13 | 0.06 | 2 | 4 | 2<br>2<br>2<br>3                | EEFVETC[330]PSEHK<br>TDSQLEDLGYC[339]VFNK<br>VKATGEESTQAEISC[330]ESPFLAK<br>TGLPPVTDENHVIVKTDSQLEDLGYC[339]VFNK                                                | 1<br>1<br>1<br>1                |
| MARCO_HUMAN (Q9UEW3) Macrophage receptor MARCO (Macrophage receptor with collagenous structure) (Scavenger receptor class A member 2) [MASS=52658]                                                            | *    | 5.00  | *    | *    | * | 1 | 3                               | VDNFTQNPGM[147]FRIKGEQGAPGLQGHK                                                                                                                                | 1                               |

|                                                                                                                                                                                                                                                                              |      |       |      |      |   |   |   |                                            |   |
|------------------------------------------------------------------------------------------------------------------------------------------------------------------------------------------------------------------------------------------------------------------------------|------|-------|------|------|---|---|---|--------------------------------------------|---|
| MARK4_HUMAN (Q96L34) MAP/microtubule affinity-regulating kinase 4 (EC 2.7.11.1) (MAP/microtubule affinity-regulating kinase-like 1) [MASS=82519]                                                                                                                             | 0.00 | 12.77 | 0.96 | 0.00 | 1 | 5 | 3 | VPPASPSHSLAPPSGERSR                        | 1 |
|                                                                                                                                                                                                                                                                              |      |       |      |      |   |   | 2 | HSDFC[330]GPSPAPLHPKR                      | 1 |
|                                                                                                                                                                                                                                                                              |      |       |      |      |   |   | 1 | KDSTSTPNLPPSM[147]M[147]TR                 | 1 |
|                                                                                                                                                                                                                                                                              |      |       |      |      |   |   | 2 | DRRAGGGGGGGVQNGPPASPTLAHEAAPLPAGR          | 1 |
|                                                                                                                                                                                                                                                                              |      |       |      |      |   |   | 2 | PPEALM[147]AALR                            | 1 |
| MAST1_HUMAN (Q9Y2H9) Microtubule-associated serine/threonine-protein kinase 1 (EC 2.7.11.1) (Syntrophin-associated serine/threonine-protein kinase) [MASS=170676]                                                                                                            | 0.00 | 7.58  | 0.61 | 0.00 | 1 | 5 | 2 | HLC[330]M[147]VMEYVEGGDC[330]ATLLK         | 1 |
|                                                                                                                                                                                                                                                                              |      |       |      |      |   |   | 3 | PRPGDLC[339]PPSKDGDASGPR                   | 1 |
|                                                                                                                                                                                                                                                                              |      |       |      |      |   |   | 3 | VIKSASATALSVM[147]IPAVDPHGSSPLASPM[147]SPR | 1 |
|                                                                                                                                                                                                                                                                              |      |       |      |      |   |   | 3 | AALSPVQEHEHGRRSSSGEAGTPLVPIVVEPAR          | 1 |
|                                                                                                                                                                                                                                                                              |      |       |      |      |   |   | 2 | WVLEVVEERTTSLGPR                           | 1 |
| MAST2_HUMAN (Q6P0Q8) Microtubule-associated serine/threonine-protein kinase 2 (EC 2.7.11.1) [MASS=196434]                                                                                                                                                                    | 0.00 | 1.06  | *    | *    | * | 2 | 2 | YIVSQLGLTR                                 | 1 |
|                                                                                                                                                                                                                                                                              |      |       |      |      |   |   | 3 | GSFC[330]RTSNR                             | 1 |
|                                                                                                                                                                                                                                                                              |      |       |      |      |   |   |   |                                            |   |
| MAST3_HUMAN (O60307) Microtubule-associated serine/threonine-protein kinase 3 (EC 2.7.11.1) [MASS=143136]                                                                                                                                                                    | 0.00 | 1.30  | *    | *    | * | 1 | 2 | ATGTFDNEIVMM[147]NHVYR                     | 1 |
|                                                                                                                                                                                                                                                                              |      |       |      |      |   |   |   |                                            |   |
| MATR3_HUMAN (P43243) Matrin-3 [MASS=94623]                                                                                                                                                                                                                                   | 0.23 | 5.08  | 0.41 | 0.00 | 1 | 3 | 2 | C[330]VKVDLSEK                             | 1 |
|                                                                                                                                                                                                                                                                              |      |       |      |      |   |   | 1 | KDGSASAAK                                  | 2 |
|                                                                                                                                                                                                                                                                              |      |       |      |      |   |   | 3 | MKSQAFIEMETREDAMAM[147]VDHC[330]LK         | 1 |
| MBD1_HUMAN (Q9UIS9) Methyl-CpG-binding domain protein 1 (Methyl-CpG-binding protein MBD1) (Protein containing methyl-CpG-binding domain 1) [MASS=66607]                                                                                                                      | 0.00 | 5.12  | 0.16 | 0.00 | 1 | 2 | 3 | SKVELTRYLGPAC[330]DLTLDFDK                 | 2 |
|                                                                                                                                                                                                                                                                              |      |       |      |      |   |   | 3 | TLC[339]KDC[330]RAQR                       | 1 |
|                                                                                                                                                                                                                                                                              |      |       |      |      |   |   |   |                                            |   |
| MCCC2_HUMAN (Q9HCC0) Methylcrotonoyl-CoA carboxylase beta chain, mitochondrial precursor (EC 6.4.1.4) (3-Methylcrotonyl-CoA carboxylase 2) (MCCase subunit beta) (3-methylcrotonyl-CoA:carbon dioxide ligase subunit beta) (3-Methylcrotonyl-CoA carboxylase n) [MASS=61333] | 1.00 | 7.99  | 2.23 | 0.01 | 2 | 2 | 2 | GTHFVQLC[339]C[339]QR                      | 1 |
|                                                                                                                                                                                                                                                                              |      |       |      |      |   |   | 3 | KQGTIFLAGPPLVKAATGEEVSAEDLGGADLHC[330]R    | 1 |
|                                                                                                                                                                                                                                                                              |      |       |      |      |   |   | 2 | GTHFVQLC[330]C[330]QR                      | 1 |
|                                                                                                                                                                                                                                                                              |      |       |      |      |   |   |   |                                            |   |
| MCLN2_HUMAN (Q8IZK6) Mucolin-2 [MASS=62684]                                                                                                                                                                                                                                  | *    | 2.04  | *    | *    | * | 1 | 3 | IGLKVC[330]KQHYYK                          | 1 |
| MCM3_HUMAN (P25205) DNA replication licensing factor MCM3 (DNA polymerase alpha holoenzyme-associated protein P1) (RLF subunit beta) (P102 protein) (P1-MCM3) [MASS=90980]                                                                                                   | 0.00 | 10.27 | 0.94 | 0.00 | 1 | 4 | 3 | YVLC[339]TAPRAIPTTGRGSSGVLTAAVTTDQETGER    | 1 |
|                                                                                                                                                                                                                                                                              |      |       |      |      |   |   | 2 | VALLDVFREAHQAQSIGMNRLETESINR               | 1 |
|                                                                                                                                                                                                                                                                              |      |       |      |      |   |   | 2 | EHAQAQSIGMNR                               | 1 |
|                                                                                                                                                                                                                                                                              |      |       |      |      |   |   | 3 | EISDHVLRMHR                                | 1 |

|                                                                                                                                                                                                                    |      |       |      |      |   |   |  |   |                                                  |   |
|--------------------------------------------------------------------------------------------------------------------------------------------------------------------------------------------------------------------|------|-------|------|------|---|---|--|---|--------------------------------------------------|---|
|                                                                                                                                                                                                                    |      |       |      |      |   |   |  | 2 | VAIHEAMEQQTISIAK                                 | 1 |
|                                                                                                                                                                                                                    |      |       |      |      |   |   |  | 1 | YIIMR                                            | 3 |
| MCM5_HUMAN (P33992) DNA replication licensing factor MCM5 (CDC46 homolog) (P1-CDC46) [MASS=82285]                                                                                                                  | 0.00 | 12.53 | 2.30 | 0.00 | 1 | 5 |  | 3 | C[339]SVLAAANSVFGRWDETKGEDNIDFMPTILSR            | 1 |
|                                                                                                                                                                                                                    |      |       |      |      |   |   |  | 2 | YIIMRSGAR                                        | 1 |
|                                                                                                                                                                                                                    |      |       |      |      |   |   |  | 3 | NFIMEGGAMVLADGGVVC[339]DEFDKM[147]REDDR          | 1 |
| MCM7_HUMAN (P33993) DNA replication licensing factor MCM7 (CDC47 homolog) (P1.1-MCM3) [MASS=81307]                                                                                                                 | 0.00 | 4.45  | 2.03 | 0.00 | 1 | 3 |  | 2 | FSEAEQR                                          | 1 |
|                                                                                                                                                                                                                    |      |       |      |      |   |   |  | 2 | YIAM[147]C[339]R                                 | 1 |
|                                                                                                                                                                                                                    |      |       |      |      |   |   |  | 3 | IAQPGDHVSVTGIFLPILR                              | 1 |
| MCR_HUMAN (P08235) Mineralocorticoid receptor (MR) [MASS=107067]                                                                                                                                                   | *    | 6.40  | *    | *    | * | 2 |  | 3 | LKGIHEEQPQQQPPPPPPPPQSPEEGTTYIAPAK               | 1 |
|                                                                                                                                                                                                                    |      |       |      |      |   |   |  | 3 | SFMSDSGSSVNGGVM[147]RAIVKSPIM[147]C[339]HEK      | 1 |
| MDC1_HUMAN (Q14676) Mediator of DNA damage checkpoint protein 1 (Nuclear factor with BRCT domains 1) [MASS=226665]                                                                                                 | *    | 3.02  | *    | *    | * | 2 |  | 3 | APQAVPLEKSQASMVINSDDTDEEEVSAALTLAHLK             | 1 |
|                                                                                                                                                                                                                    |      |       |      |      |   |   |  | 2 | VQGETQPQRLLLAEDSEEEVDFLSERR                      | 1 |
| MDGA1_HUMAN (Q8NFP4) MAM domain-containing glycosylphosphatidylinositol anchor protein 1 precursor (MAM domain-containing protein 3) (GPI and MAM protein) (Glycosylphosphatidylinositol-MAM) (GPIM) [MASS=105790] | 0.00 | 8.90  | 1.27 | 0.00 | 1 | 4 |  | 2 | EGDTLMLQC[339]LVTGHPRPQVR                        | 1 |
|                                                                                                                                                                                                                    |      |       |      |      |   |   |  | 2 | LSIRQLNQHNAVVKAIQVR                              | 1 |
|                                                                                                                                                                                                                    |      |       |      |      |   |   |  | 3 | SPNTGPPTDISGTPEGYYM[147]FIETSR                   | 1 |
|                                                                                                                                                                                                                    |      |       |      |      |   |   |  | 2 | VYTIREGDTLM[147]LQC[339]LVTGHPR                  | 1 |
| MDHC_HUMAN (P40925) Malate dehydrogenase, cytoplasmic (EC 1.1.1.37) (Cytosolic malate dehydrogenase) [MASS=36295]                                                                                                  | 1.00 | 17.42 | 0.74 | 0.23 | 3 | 3 |  | 2 | AIC[330]DHVR                                     | 2 |
|                                                                                                                                                                                                                    |      |       |      |      |   |   |  | 3 | DQPIILVLLDITPM[147]M[147]GVLDGVLMEQDC[339]ALPLLK | 1 |
|                                                                                                                                                                                                                    |      |       |      |      |   |   |  | 2 | VIVVGNPANTNC[330]LTASK                           | 1 |

|                                                                                                                              |      |       |      |      |    |   |  |   |                                      |   |
|------------------------------------------------------------------------------------------------------------------------------|------|-------|------|------|----|---|--|---|--------------------------------------|---|
|                                                                                                                              |      |       |      |      |    |   |  | 2 | GYLGPEQLPDC[339]LKGC[339]DVVVIPAGVPR | 1 |
|                                                                                                                              |      |       |      |      |    |   |  | 2 | TIIP LISQC[339]TPK                   | 1 |
|                                                                                                                              |      |       |      |      |    |   |  | 1 | GYLGPEQLPDC[339]LK                   | 2 |
|                                                                                                                              |      |       |      |      |    |   |  | 2 | SQETEC[339]TYFSTPLLLGK               | 3 |
|                                                                                                                              |      |       |      |      |    |   |  | 2 | GYLGPEQLPDC[339]LK                   | 2 |
|                                                                                                                              |      |       |      |      |    |   |  | 2 | TIIP LISQC[330]TPK                   | 1 |
|                                                                                                                              |      |       |      |      |    |   |  | 2 | GYLGPEQLPDC[330]LK                   | 2 |
| MDHM_HUMAN (P40926) Malate dehydrogenase, mitochondrial precursor (EC 1.1.1.37) [MASS=35531]                                 | 1.00 | 26.92 | 1.82 | 0.05 | 23 | 6 |  | 2 | GC[330]DVVVIPAGVPR                   | 1 |
|                                                                                                                              |      |       |      |      |    |   |  | 2 | GC[339]DVVVIPAGVPR                   | 3 |
|                                                                                                                              |      |       |      |      |    |   |  | 3 | GYLGPEQLPDC[330]LKGC[330]DVVVIPAGVPR | 1 |
|                                                                                                                              |      |       |      |      |    |   |  | 1 | TIIP LISQC[339]TPK                   | 2 |
|                                                                                                                              |      |       |      |      |    |   |  | 1 | EGVVEC[330]SFVK                      | 2 |
|                                                                                                                              |      |       |      |      |    |   |  | 2 | EGVVEC[339]SFVK                      | 2 |
|                                                                                                                              |      |       |      |      |    |   |  | 1 | TIIP LISQC[330]TPK                   | 1 |
|                                                                                                                              |      |       |      |      |    |   |  | 2 | LRLLEEAQLQDLEK                       | 1 |
|                                                                                                                              |      |       |      |      |    |   |  | 1 | MKLRDLM[147]EAAFK                    | 1 |
|                                                                                                                              |      |       |      |      |    |   |  | 2 | MVAFNNQIDHEVTVEKKWGQK                | 1 |
| MDN1_HUMAN (Q9NU22) Midasin (MIDAS-containing protein) [MASS=632816]                                                         | *    | 2.09  | *    | *    | *  | 7 |  | 3 | LLQALHIDGPRSAQVAQSLLK                | 1 |
|                                                                                                                              |      |       |      |      |    |   |  | 1 | ATNQDWM[147]LRVK                     | 1 |
|                                                                                                                              |      |       |      |      |    |   |  | 3 | GLSLDRAFSEAC[330]WEVYVC[339]SQHSPANR | 1 |
|                                                                                                                              |      |       |      |      |    |   |  | 3 | LVKVM[147]LDLQSYR                    | 1 |
|                                                                                                                              |      |       |      |      |    |   |  | 1 | NGGAKKK                              | 1 |
| MDR1_HUMAN (P08183) Multidrug resistance protein 1 (EC 3.6.3.44) (P-glycoprotein 1) (CD243 antigen) [MASS=141461]            | *    | 2.34  | *    | *    | *  | 2 |  | 3 | ENVTMDEIEKAVKEANAYDFIMK              | 1 |
|                                                                                                                              |      |       |      |      |    |   |  | 2 | LILQLC[330]IGNHDLFMR                 | 1 |
| MERL_HUMAN (P35240) Merlin (Moesin-ezrin-radixin-like protein) (Neurofibromin-2) (Schwannomin) (Schwannomerlin) [MASS=69690] | 0.00 | 9.24  | 1.00 | 0.12 | 2  | 3 |  | 3 | QPKTFTVRIVTMDAEMEFNC[330]EM[147]K    | 1 |
|                                                                                                                              |      |       |      |      |    |   |  | 3 | LILQLC[330]IGNHDLFMRRR               | 1 |



|                                                                                                                                                                                                                                                                      |                                    |       |      |      |    |   |   |                                    |   |
|----------------------------------------------------------------------------------------------------------------------------------------------------------------------------------------------------------------------------------------------------------------------|------------------------------------|-------|------|------|----|---|---|------------------------------------|---|
| MFN2_HUMAN (O95140) Transmembrane GTPase MFN2 (EC 3.6.5.-) (Mitofusin-2) [MASS=86402]                                                                                                                                                                                | 1.00                               | 6.47  | 1.43 | 0.03 | 4  | 4 | 2 | VLPSTGHTTNC[339]FLR                | 1 |
|                                                                                                                                                                                                                                                                      |                                    |       |      |      |    |   | 2 | VLPSTGHTTNC[330]FLR                | 2 |
|                                                                                                                                                                                                                                                                      |                                    |       |      |      |    |   | 2 | C[330]NSIVTVKKNK                   | 1 |
|                                                                                                                                                                                                                                                                      |                                    |       |      |      |    |   | 2 | RFEEC[339]ISQSAVK                  | 1 |
|                                                                                                                                                                                                                                                                      |                                    |       |      |      |    |   | 2 | QVSTAMAEIIR                        | 1 |
|                                                                                                                                                                                                                                                                      |                                    |       |      |      |    |   | 2 | YKVEYPIMYSTDPENGHIFNC[330]IQR      | 1 |
| MGST3_HUMAN (O14880) Microsomal glutathione S-transferase 3 (EC 2.5.1.18) (Microsomal GST-3) (Microsomal GST-III) [MASS=16516]                                                                                                                                       | 1.00                               | 30.26 | 1.81 | 0.03 | 10 | 2 | 2 | YKVEYPIMYSTDPENGHIFNC[339]IQR      | 1 |
|                                                                                                                                                                                                                                                                      |                                    |       |      |      |    |   | 2 | YKVEYPIMYSTDPENGHIFNC[330]IQR      | 1 |
|                                                                                                                                                                                                                                                                      |                                    |       |      |      |    |   | 2 | YKVEYPIM[147]YSTDPENGHIFNC[339]IQR | 1 |
|                                                                                                                                                                                                                                                                      |                                    |       |      |      |    |   | 3 | VEYPIMYSTDPENGHIFNC[339]IQR        | 1 |
|                                                                                                                                                                                                                                                                      |                                    |       |      |      |    |   | 3 | VEYPIM[147]YSTDPENGHIFNC[339]IQR   | 1 |
|                                                                                                                                                                                                                                                                      |                                    |       |      |      |    |   | 2 | VEYPIM[147]YSTDPENGHIFNC[330]IQR   | 1 |
|                                                                                                                                                                                                                                                                      |                                    |       |      |      |    |   | 3 | YKVEYPIM[147]YSTDPENGHIFNC[330]IQR | 1 |
|                                                                                                                                                                                                                                                                      |                                    |       |      |      |    |   | 3 | YKVEYPIMYSTDPENGHIFNC[339]IQR      | 1 |
|                                                                                                                                                                                                                                                                      |                                    |       |      |      |    |   | 2 | YKVEYPIM[147]YSTDPENGHIFNC[330]IQR | 1 |
|                                                                                                                                                                                                                                                                      |                                    |       |      |      |    |   | 2 | VEYPIM[147]YSTDPENGHIFNC[339]IQR   | 1 |
| 3                                                                                                                                                                                                                                                                    | YKVEYPIM[147]YSTDPENGHIFNC[339]IQR | 1     |      |      |    |   |   |                                    |   |
| MIF_HUMAN (P14174) Macrophage migration inhibitory factor (MIF) (Phenylpyruvate tautomerase) (EC 5.3.2.1) (Glycosylation-inhibiting factor) (GIF) [MASS=12345]                                                                                                       | 0.00                               | 7.89  | 1.22 | 0.00 | 1  | 1 | 2 | LLC[339]GLLAER                     | 1 |
|                                                                                                                                                                                                                                                                      |                                    |       |      |      |    |   |   |                                    |   |
| MIRO1_HUMAN (Q8IXI2) Mitochondrial Rho GTPase 1 (EC 3.6.5.-) (MIRO-1) (hMiro-1) (Ras homolog gene family member T1) (Rac-GTP-binding protein-like protein) [MASS=70784]                                                                                              | 1.00                               | 2.43  | 0.99 | 0.02 | 2  | 1 | 2 | AVLHPTGPLYC[330]PEEK               | 1 |
|                                                                                                                                                                                                                                                                      |                                    |       |      |      |    |   | 2 | AVLHPTGPLYC[339]PEEK               | 1 |
| MK01_HUMAN (P28482) Mitogen-activated protein kinase 1 (EC 2.7.11.24) (Extracellular signal-regulated kinase 2) (ERK-2) (Mitogen-activated protein kinase 2) (MAP kinase 2) (MAPK 2) (p42-MAPK) (ERT1) [MASS=41258]                                                  | 0.98                               | 3.34  | *    | *    | *  | 1 | 2 | ISPFHQTYC[330]QR                   | 1 |
| MK03_HUMAN (P27361) Mitogen-activated protein kinase 3 (EC 2.7.11.24) (Extracellular signal-regulated kinase 1) (ERK-1) (Insulin-stimulated MAP2 kinase) (MAP kinase 1) (MAPK 1) (p44-ERK1) (ERT2) (p44-MAPK) (Microtubule-associated protein 2 kinase) [MASS=43135] | 0.98                               | 5.28  | 1.00 | 0.00 | 1  | 1 | 2 | HENVIGIRDILRASTLEAMR               | 1 |

|                                                                                                                                                                                                           |      |       |      |      |   |   |   |                                      |   |
|-----------------------------------------------------------------------------------------------------------------------------------------------------------------------------------------------------------|------|-------|------|------|---|---|---|--------------------------------------|---|
| MKKS_HUMAN (Q9NPJ1) McKusick-Kaufman/Bardet-Biedl syndromes putative chaperonin (Bardet-Biedl syndrome 6 protein) [MASS=62341]                                                                            | *    | 6.14  | *    | *    | * | 2 | 2 | VIHPSLKQFLNM[147]HR                  | 1 |
|                                                                                                                                                                                                           |      |       |      |      |   |   | 2 | VIDSTVLPGLIEM[147]SEVQLM[147]R       | 1 |
| MKLN1_HUMAN (Q9UL63) Muskelein [MASS=84767]                                                                                                                                                               | *    | 1.90  | *    | *    | * | 1 | 3 | LERPAIVQNITFGK                       | 1 |
| MMAB_HUMAN (Q96EY8) Cob(I)yrinic acid a,c-diamide adenosyltransferase, mitochondrial precursor (EC 2.5.1.17) (Cob(I)alamin adenosyltransferase) (Methylmalonic aciduria type B protein) [MASS=27388]      | 0.00 | 3.60  | 1.40 | 0.00 | 1 | 1 | 2 | ISSALHFC[339]R                       | 1 |
| MMP17_HUMAN (Q9ULZ9) Matrix metalloproteinase-17 precursor (EC 3.4.24.-) (MMP-17) (Membrane-type matrix metalloproteinase 4) (MT-MMP 4) (Membrane-type-4 matrix metalloproteinase) (MT4-MMP) [MASS=67006] | *    | 2.64  | *    | *    | * | 1 | 3 | VRTFPRDSPLGHDTV                      | 2 |
| MMSA_HUMAN (Q02252) Methylmalonate-semialdehyde dehydrogenase [acylating], mitochondrial precursor (EC 1.2.1.27) (MMSDH) (Malonate-semialdehyde dehydrogenase [acylating]) (EC 1.2.1.18) [MASS=57839]     | 1.00 | 10.28 | 1.56 | 0.06 | 3 | 3 | 3 | LLQDSGAPDGLNIIHGQHEAVNFIC[330]DHPDIK | 1 |
|                                                                                                                                                                                                           |      |       |      |      |   |   | 2 | AEM[147]DAAIASC[339]K                | 1 |
|                                                                                                                                                                                                           |      |       |      |      |   |   | 2 | AEM[147]DAAIASC[339]KR               | 1 |
| MOG_HUMAN (Q16653) Myelin-oligodendrocyte glycoprotein precursor [MASS=28179]                                                                                                                             | 1.00 | 4.86  | 0.84 | 0.00 | 2 | 1 | 2 | FSDEGGFTC[339]FFR                    | 1 |
|                                                                                                                                                                                                           |      |       |      |      |   |   | 2 | FSDEGGFTC[330]FFR                    | 1 |
| MOL2A_HUMAN (Q96BX8) Mps one binder kinase activator-like 2A (Mob1 homolog 2A) (MOB-LAK) (Protein Mob3A) [MASS=25464]                                                                                     | 0.24 | 6.91  | 2.45 | 0.00 | 1 | 1 | 2 | IAQMGSEAHVNTC[339]YK                 | 1 |
| MORC2_HUMAN (Q9Y6X9) MORC family CW-type zinc finger 2 (Zinc finger CW-type coiled-coil domain protein 1) [MASS=110724]                                                                                   | 0.00 | 2.78  | 2.85 | 0.00 | 1 | 1 | 3 | IEPDTTALSTNHETIDLLVQILRNC[339]LR     | 1 |
| MORC3_HUMAN (Q14149) MORC family CW-type zinc finger 3 (Zinc finger CW-type coiled-coil domain protein 3) [MASS=107112]                                                                                   | 0.00 | 2.34  | 0.68 | 0.00 | 1 | 1 | 2 | QC[330]HMFTDQIKVLQQRILEM[147]JNDK    | 1 |

|                                                                                                                                                                                                                                                                               |      |       |      |      |   |   |   |                                                 |   |
|-------------------------------------------------------------------------------------------------------------------------------------------------------------------------------------------------------------------------------------------------------------------------------|------|-------|------|------|---|---|---|-------------------------------------------------|---|
| MORC4_HUMAN (Q8TE76) MORC family CW-type zinc finger 4 (Zinc finger CW-type coiled-coil domain protein 2) [MASS=106347]                                                                                                                                                       | 0.00 | 3.42  | 2.02 | 0.00 | 1 | 2 | 2 | SQC[339]PIGVFNGNGFKSGSMRLGK                     | 1 |
|                                                                                                                                                                                                                                                                               |      |       |      |      |   |   | 2 | YLQSNSSSHTR                                     | 2 |
| MPIP1_HUMAN (P30304) M-phase inducer phosphatase 1 (EC 3.1.3.48) (Dual specificity phosphatase Cdc25A) [MASS=59086]                                                                                                                                                           | 0.00 | 7.63  | 1.16 | 0.00 | 1 | 2 | 2 | LLGC[339]SPALK                                  | 1 |
|                                                                                                                                                                                                                                                                               |      |       |      |      |   |   | 3 | M[147]GSSESTDSGFC[339]LDSPGPLDSKENLENPM[147]JRR | 1 |
| MPRI_HUMAN (P11717) Cation-independent mannose-6-phosphate receptor precursor (CI Man-6-P receptor) (CI-MPR) (M6PR) (Insulin-like growth factor 2 receptor) (Insulin-like growth factor II receptor) (IGF-II receptor) (M6P/IGF2 receptor) (M6P/IGF2R) (300 kD) [MASS=274274] | 0.00 | 2.13  | 0.96 | 0.00 | 1 | 3 | 2 | VEGDNC[330]EVK                                  | 1 |
|                                                                                                                                                                                                                                                                               |      |       |      |      |   |   | 3 | SVISFVC[330]RPEAGPTNRPMLISLDK                   | 1 |
|                                                                                                                                                                                                                                                                               |      |       |      |      |   |   | 3 | YYLQDGDLDVVVFASSSKC[339]GK                      | 1 |
| MRCKG_HUMAN (Q6DT37) Serine/threonine-protein kinase MRCK gamma (EC 2.7.11.1) (CDC42-binding protein kinase gamma) (Myotonic dystrophy kinase-related CDC42-binding kinase gamma) (Myotonic dystrophy protein kinase-like alpha) (MRCK gamma) (DMPK-like gamma) [MASS=172517] | 0.49 | 3.93  | 1.64 | 0.00 | 1 | 3 | 3 | EQERLEAELAQEQESK                                | 1 |
|                                                                                                                                                                                                                                                                               |      |       |      |      |   |   | 2 | EM[147]LKDPFVR                                  | 1 |
|                                                                                                                                                                                                                                                                               |      |       |      |      |   |   | 3 | LC[339]VGAAGGFALYPLLNEAAPLALGAGLVPEELPPSR       | 1 |
| MRIP_HUMAN (Q6WCQ1) Myosin phosphatase Rho-interacting protein (Rho-interacting protein 3) (M-RIP) (RIP3) (p116Rip) [MASS=116445]                                                                                                                                             | *    | 1.46  | *    | *    | * | 1 | 2 | M[147]EVDRSPGLPMSDLK                            | 1 |
| MTA3_HUMAN (Q9BTC8) Metastasis-associated protein MTA3 [MASS=67503]                                                                                                                                                                                                           | *    | 5.39  | *    | *    | * | 2 | 3 | LC[330]AIC[330]WLYWKK                           | 1 |
|                                                                                                                                                                                                                                                                               |      |       |      |      |   |   | 2 | VGPRYQADIPEMLLEGESDER                           | 1 |
|                                                                                                                                                                                                                                                                               |      |       |      |      |   |   | 1 | LC[339]SGVLGTVVHGK                              | 1 |
| MTCH2_HUMAN (Q9Y6C9) Mitochondrial carrier homolog 2 (Met-induced mitochondrial protein) [MASS=33331]                                                                                                                                                                         | 1.00 | 15.51 | 1.58 | 0.05 | 5 | 3 | 3 | QVC[339]QLPGLFSYAQHIASIDGR                      | 1 |
|                                                                                                                                                                                                                                                                               |      |       |      |      |   |   | 2 | YC[339]GLC[339]DSIITIYR                         | 1 |
|                                                                                                                                                                                                                                                                               |      |       |      |      |   |   | 2 | QVC[339]QLPGLFSYAQHIASIDGR                      | 1 |
|                                                                                                                                                                                                                                                                               |      |       |      |      |   |   | 2 | LC[339]SGVLGTVVHGK                              | 1 |
| MTMR3_HUMAN (Q13615) Myotubularin-related protein 3 (EC 3.1.3.48) (FYVE domain-containing dual specificity protein phosphatase 1) (FYVE-DSP1) (Zinc finger FYVE domain-containing protein 10) [MASS=133618]                                                                   | *    | 1.67  | *    | *    | * | 1 | 2 | DC[339]KVIRC[330]QFSTFEQC[330]QEWLK             | 1 |

|                                                                                                                                                                                                                                              |      |       |      |      |   |    |   |                                              |                                  |   |
|----------------------------------------------------------------------------------------------------------------------------------------------------------------------------------------------------------------------------------------------|------|-------|------|------|---|----|---|----------------------------------------------|----------------------------------|---|
| MTX2_HUMAN (O75431) Metaxin-2<br>[MASS=29763]                                                                                                                                                                                                | 0.99 | 10.27 | 1.15 | 0.00 | 1 | 1  | 3 | GEQILLSDNAASLAVQAFLQMC[330]NLPIK             | 1                                |   |
|                                                                                                                                                                                                                                              |      |       |      |      |   |    |   | 2                                            | VQLAGFHILEALRLHRTGYADHMGLTR      | 1 |
|                                                                                                                                                                                                                                              |      |       |      |      |   |    |   | 2                                            | AQLLHTC[330]TGPDLIVLQPRGPSVPSAGK | 1 |
|                                                                                                                                                                                                                                              |      |       |      |      |   |    |   | 2                                            | RQFQVLDAPLLK                     | 1 |
| MY18B_HUMAN (Q8IUG5) Myosin-18B<br>(Myosin XVIIIb) [MASS=285183]                                                                                                                                                                             | *    | 5.45  | *    | *    | * | 8  | 2 | LDPDSAKPEKTHPHDAPP[330]K                     | 1                                |   |
|                                                                                                                                                                                                                                              |      |       |      |      |   |    | 3 | RQFQVLDAPLLK                                 | 1                                |   |
|                                                                                                                                                                                                                                              |      |       |      |      |   |    | 2 | EGVLLSKAEK                                   | 1                                |   |
|                                                                                                                                                                                                                                              |      |       |      |      |   |    | 3 | DVGSEGKHVRPQIPGR                             | 1                                |   |
|                                                                                                                                                                                                                                              |      |       |      |      |   |    | 2 | LHQLEMQLQEYEEK                               | 1                                |   |
| MYBB_HUMAN (P10244) Myb-related protein<br>B (B-Myb) [MASS=78764]                                                                                                                                                                            | 0.00 | 2.86  | 0.26 | 0.00 | 1 | 1  | 2 | QDTLELESPSLTSTPVC[330]SQK                    | 1                                |   |
|                                                                                                                                                                                                                                              |      |       |      |      |   |    | 2 | LITSQVFGKLISGDAEPTPEQEEK                     | 1                                |   |
|                                                                                                                                                                                                                                              |      |       |      |      |   |    | 3 | LHNSPSAFNIYC[330]NVRHC[330]VLEWQKK           | 1                                |   |
|                                                                                                                                                                                                                                              |      |       |      |      |   |    | 3 | GASC[339]SAQGFYGLGNSKGDRGNISTSSK             | 1                                |   |
|                                                                                                                                                                                                                                              |      |       |      |      |   |    | 2 | TSSRPAMIGSLTDGSTETFWESGDEDK                  | 1                                |   |
|                                                                                                                                                                                                                                              |      |       |      |      |   |    | 3 | SPVRC[339]ATTR                               | 12                               |   |
| MYCB2_HUMAN (O75592) Probable ubiquitin<br>ligase protein MYCBP2 (EC 6.3.2.-) (Myc-<br>binding protein 2) (Protein associated with Myc)<br>(Pam/highwire/rpm-1 protein) [MASS=510165]                                                        | *    | 4.57  | *    | *    | * | 10 | 2 | IYTAALNDR                                    | 1                                |   |
|                                                                                                                                                                                                                                              |      |       |      |      |   |    | 2 | NRHSLEISSALNM[147]FNIAPHGPDISK               | 1                                |   |
|                                                                                                                                                                                                                                              |      |       |      |      |   |    | 2 | EFALMKTANGK                                  | 1                                |   |
|                                                                                                                                                                                                                                              |      |       |      |      |   |    | 2 | VTSM[147]TFLTGKAVEDLC[339]RIK                | 1                                |   |
|                                                                                                                                                                                                                                              |      |       |      |      |   |    | 3 | DTGAM[147]NQGGKGFVENM[147]ATAMDEDELEELDEKDEK | 1                                |   |
|                                                                                                                                                                                                                                              |      |       |      |      |   |    | 2 | LDPHLVLDQLRC[339]NGVLEGIRIC[339]R            | 1                                |   |
| MYH10_HUMAN (P35580) Myosin-10 (Myosin<br>heavy chain, nonmuscle IIb) (Nonmuscle<br>myosin heavy chain IIb) (NMMHC II-b)<br>(NMMHC-IIb) (Cellular myosin heavy chain,<br>type B) (Nonmuscle myosin heavy chain-B)<br>(NMMHC-B) [MASS=228937] | 0.99 | 4.15  | 1.16 | 0.00 | 1 | 4  | 2 | NILAEQLQAETELFAEAEEMR                        | 1                                |   |
|                                                                                                                                                                                                                                              |      |       |      |      |   |    | 2 | IAEC[330]SSQLAEIEEEKAK                       | 1                                |   |
|                                                                                                                                                                                                                                              |      |       |      |      |   |    | 2 | YEILTPNAIPKGF[147]DGKQAC[339]ER              | 1                                |   |
|                                                                                                                                                                                                                                              |      |       |      |      |   |    | 2 |                                              |                                  |   |

|                                                                                                                                                               |      |      |      |      |   |   |   |                                          |   |
|---------------------------------------------------------------------------------------------------------------------------------------------------------------|------|------|------|------|---|---|---|------------------------------------------|---|
| MYH4_HUMAN (Q9Y623) Myosin-4 (Myosin heavy chain, skeletal muscle, fetal) (Myosin heavy chain IIb) (MyHC-IIb) [MASS=223012]                                   | *    | 1.65 | *    | *    | * | 3 | 3 | LGEAEQLALKGGKK                           | 1 |
|                                                                                                                                                               |      |      |      |      |   |   | 1 | VKAYK                                    | 1 |
|                                                                                                                                                               |      |      |      |      |   |   | 3 | RANLM[147]QAEVEELR                       | 1 |
| MYL4_HUMAN (P12829) Myosin light polypeptide 4 (Myosin light chain 1, embryonic muscle/atrial isoform) (Myosin light chain alkali, GT-1 isoform) [MASS=21433] | *    | 9.18 | *    | *    | * | 1 | 3 | MLDFETFLPILQHISRNK                       | 1 |
| MYLK2_HUMAN (Q9H1R3) Myosin light chain kinase 2, skeletal/cardiac muscle (EC 2.7.11.18) (MLCK2) [MASS=64553]                                                 | *    | 4.37 | *    | *    | * | 1 | 3 | EEDC[330]FQILDDC[330]PPPPAPFPHRMVELR     | 1 |
| MYO15_HUMAN (Q9UKN7) Myosin-15 (Myosin XV) (Unconventional myosin-15) [MASS=395172]                                                                           | 0.00 | 1.78 | 0.46 | 0.00 | 1 | 4 | 2 | TQRPTANSSYPYVEIALGDVAAQR                 | 1 |
|                                                                                                                                                               |      |      |      |      |   |   | 2 | RPDPHEEALM[147]ILK                       | 1 |
|                                                                                                                                                               |      |      |      |      |   |   | 2 | C[339]QVEGALLWEQEELSK                    | 1 |
|                                                                                                                                                               |      |      |      |      |   |   | 2 | M[147]ERC[330]NPLFMR                     | 1 |
| MYO1C_HUMAN (O00159) Myosin Ic (Myosin I beta) (MMI-beta) (MMIb) [MASS=118038]                                                                                | 0.00 | 3.60 | 1.12 | 0.00 | 1 | 2 | 2 | LGLERNPQSYLYLVKGQC[339]AK                | 1 |
|                                                                                                                                                               |      |      |      |      |   |   | 2 | NNDLLFRNLKETMC[339]SSK                   | 1 |
|                                                                                                                                                               |      |      |      |      |   |   | 3 | FGKYIDIHFNKR                             | 4 |
| MYO7A_HUMAN (Q13402) Myosin-7A (Myosin VIIa) [MASS=254404]                                                                                                    | *    | 1.72 | *    | *    | * | 3 | 3 | TFVNGTRTQPPSWLELQATK                     | 1 |
|                                                                                                                                                               |      |      |      |      |   |   | 1 | SSVRHK                                   | 1 |
| MYOM2_HUMAN (P54296) Myomesin-2 (M-protein) (165 kDa titin-associated protein) (165 kDa connectin-associated protein) [MASS=164793]                           | *    | 2.39 | *    | *    | * | 1 | 3 | FVVHGLTTGEQYIFRVKAVNAVGM[147]SENSQESDVIK | 1 |
| MYPC2_HUMAN (Q14324) Myosin-binding protein C, fast-type (Fast MyBP-C) (C-protein, skeletal muscle fast-isoform) [MASS=128142]                                | *    | 6.13 | *    | *    | * | 4 | 2 | IRVVEKAGPPINVMVK                         | 1 |
|                                                                                                                                                               |      |      |      |      |   |   | 2 | KDDDDLGIPEIWELLKGAK                      | 1 |
|                                                                                                                                                               |      |      |      |      |   |   | 2 | RILTINKC[339]TLADDAAYEVAVK               | 1 |
|                                                                                                                                                               |      |      |      |      |   |   | 3 | AVNELGEALAEK[339]K                       | 1 |
| MYPC3_HUMAN (Q14896) Myosin-binding protein C, cardiac-type (Cardiac MyBP-C) (C-protein, cardiac muscle isoform) [MASS=140761]                                | *    | 6.36 | *    | *    | * | 4 | 3 | WLKDGVELTREETFK                          | 1 |
|                                                                                                                                                               |      |      |      |      |   |   | 2 | NPVGEDQVNLTVKVIDVPDAPAAPK                | 1 |
|                                                                                                                                                               |      |      |      |      |   |   | 3 | QAPPSEYERIAFQYGVTDLR                     | 1 |
|                                                                                                                                                               |      |      |      |      |   |   | 2 | M[147]IEGVVYEMRVYAVNAIGMSR               | 1 |

|                                                                                                                                                                                                                                                                              |      |       |      |      |    |   |   |                                     |   |
|------------------------------------------------------------------------------------------------------------------------------------------------------------------------------------------------------------------------------------------------------------------------------|------|-------|------|------|----|---|---|-------------------------------------|---|
|                                                                                                                                                                                                                                                                              |      |       |      |      |    |   | 2 | VC[339]GSNLLSIC[339]K               | 2 |
|                                                                                                                                                                                                                                                                              |      |       |      |      |    |   | 2 | VC[330]GSNLLSIC[330]K               | 2 |
| MYPR_HUMAN (P60201) Myelin proteolipid protein (PLP) (Lipophilin) [MASS=29946]                                                                                                                                                                                               | 1.00 | 13.41 | 1.34 | 0.07 | 12 | 4 | 1 | TSASIGSLC[339]ADAR                  | 1 |
|                                                                                                                                                                                                                                                                              |      |       |      |      |    |   | 2 | TTIC[330]GK                         | 1 |
|                                                                                                                                                                                                                                                                              |      |       |      |      |    |   | 2 | VC[339]HC[339]LGK                   | 1 |
|                                                                                                                                                                                                                                                                              |      |       |      |      |    |   | 2 | TTIC[339]GK                         | 1 |
|                                                                                                                                                                                                                                                                              |      |       |      |      |    |   | 2 | TSASIGSLC[330]ADAR                  | 1 |
|                                                                                                                                                                                                                                                                              |      |       |      |      |    |   | 2 | VC[330]HC[330]LGK                   | 1 |
|                                                                                                                                                                                                                                                                              |      |       |      |      |    |   | 2 | TSASIGSLC[339]ADAR                  | 2 |
| MYST3_HUMAN (Q92794) Histone acetyltransferase MYST3 (EC 2.3.1.48) (EC 2.3.1.-) (MYST protein 3) (MOZ, YBF2/SAS3, SAS2 and TIP60 protein 3) (Runt-related transcription factor-binding protein 2) (Monocytic leukemia zinc finger protein) (Zinc finger protei [MASS=225054] | *    | 1.40  | *    | *    | *  | 3 | 3 | GM[147]WIC[330]QIC[330]RPR          | 2 |
|                                                                                                                                                                                                                                                                              |      |       |      |      |    |   | 2 | KKELEEQPTR                          | 1 |
|                                                                                                                                                                                                                                                                              |      |       |      |      |    |   | 1 | VRTGPGR                             | 1 |
| N2DL4_HUMAN (Q8TD07) NKG2D ligand 4 precursor (NKG2D ligand 4) (NKG2DL4) (N2DL4) (Retinoic acid early transcript 1E) (Lymphocyte effector toxicity activation ligand) (RAE-1-like transcript 4) (RL-4) [MASS=30122]                                                          | 0.00 | 5.32  | 0.57 | 0.00 | 1  | 1 | 2 | C[330]TGASWQFATNGEK                 | 1 |
| N4BM_HUMAN (O95298) NADH-ubiquinone oxidoreductase subunit B14.5b (EC 1.6.5.3) (EC 1.6.99.3) (Complex I-B14.5b) (CI-B14.5b) [MASS=14187]                                                                                                                                     | 0.99 | 15.97 | 1.65 | 0.00 | 1  | 1 | 2 | LLYIGFLGYC[339]SGLIDNLIR            | 1 |
| N4BP3_HUMAN (O15049) NEDD4-binding protein 3 (N4BP3) [MASS=60441]                                                                                                                                                                                                            | *    | 4.41  | *    | *    | *  | 1 | 3 | PSVFKPTAGNGKGFLSMQSLASHK            | 1 |
| NAB1_HUMAN (Q13506) NGFI-A-binding protein 1 (EGR-1-binding protein 1) (Transcriptional regulatory protein p54) [MASS=54401]                                                                                                                                                 | 0.00 | 8.83  | 0.63 | 0.00 | 1  | 2 | 2 | VMAKQMEFLC[339]NQAGYERLQHAER        | 1 |
|                                                                                                                                                                                                                                                                              |      |       |      |      |    |   | 2 | ESSEALDAAAALVAEC[330]VER            | 1 |
| NAC2_HUMAN (Q9UPR5) Sodium/calcium exchanger 2 precursor (Na(+)/Ca(2+)-exchange protein 2) [MASS=100367]                                                                                                                                                                     | 0.95 | 10.21 | 0.68 | 0.00 | 1  | 5 | 2 | IAEM[147]GKPVLGENC[330]R            | 1 |
|                                                                                                                                                                                                                                                                              |      |       |      |      |    |   | 3 | GPKLATTALFLGLWLLYILFASLEAYC[330]HIR | 1 |
|                                                                                                                                                                                                                                                                              |      |       |      |      |    |   | 3 | EKEITITKANGETSVGTVR                 | 1 |
|                                                                                                                                                                                                                                                                              |      |       |      |      |    |   | 2 | C[339]QPGVLLPVWEPDDPSLGDKAAR        | 1 |
|                                                                                                                                                                                                                                                                              |      |       |      |      |    |   | 2 | REVIQILK                            | 1 |

|                                                                                                                                                                                                                                                                              |      |       |      |      |   |   |   |                                                                                      |             |
|------------------------------------------------------------------------------------------------------------------------------------------------------------------------------------------------------------------------------------------------------------------------------|------|-------|------|------|---|---|---|--------------------------------------------------------------------------------------|-------------|
| NAL12_HUMAN (P59046) NACHT, LRR and PYD-containing protein 12 (PYRIN-containing APAF1-like protein 7) (Monarch-1) (Regulated by nitric oxide) [MASS=120172]                                                                                                                  | 0.00 | 3.39  | 0.66 | 0.00 | 1 | 2 | 2 | C[330]RISSSAC[330]EDLSAALIANK<br>EHSNPMQVQQQLLDTGR                                   | 1<br>1      |
| NALP5_HUMAN (P59047) NACHT, LRR and PYD-containing protein 5 (Mater protein homolog) [MASS=134235]                                                                                                                                                                           | 0.00 | 3.33  | 1.48 | 0.00 | 1 | 2 | 2 | SLLRKVLLPESFLIVTVR<br>SLDLTDNALGDGGVAALC[339]EGLK                                    | 1<br>1      |
| NBN_HUMAN (O60934) Nibrin (Nijmegen breakage syndrome protein 1) (Cell cycle regulatory protein p95) [MASS=84958]                                                                                                                                                            | *    | 3.85  | *    | *    | * | 1 | 3 | MLSQDAPTVKESC[330]KTSSNNNSMVSNTLAK                                                   | 1           |
|                                                                                                                                                                                                                                                                              |      |       |      |      |   |   | 2 | FFLC[330]QVAGDAK                                                                     | 2           |
| NCA11_HUMAN (P13591) Neural cell adhesion molecule 1, 140 kDa isoform precursor (N-CAM 140) (NCAM-140) (CD56 antigen) [MASS=93360]                                                                                                                                           | 1.00 | 5.90  | 0.43 | 0.23 | 9 | 3 | 2 | GPVEAKPEC[339]QETETKPAPAEVK<br>GPVEAKPEC[330]QETETKPAPAEVK<br>KVDKNDEAEYIC[330]IAENK | 1<br>1<br>2 |
|                                                                                                                                                                                                                                                                              |      |       |      |      |   |   | 2 | FFLC[339]QVAGDAK                                                                     | 1           |
|                                                                                                                                                                                                                                                                              |      |       |      |      |   |   | 3 | GPVEAKPEC[330]QETETKPAPAEVK<br>KVDKNDEAEYIC[339]IAENK                                | 1<br>1      |
| NCALD_HUMAN (P61601) Neurocalcin delta [MASS=22114]                                                                                                                                                                                                                          | 0.99 | 30.73 | 0.89 | 0.04 | 2 | 3 | 3 | WAFSM[147]YDLDGNGYISK                                                                | 1           |
|                                                                                                                                                                                                                                                                              |      |       |      |      |   |   | 2 | DC[330]PSGHLISM[147]EEFKK                                                            | 1           |
|                                                                                                                                                                                                                                                                              |      |       |      |      |   |   | 2 | DC[339]PSGHLISM[147]EEFKK                                                            | 1           |
|                                                                                                                                                                                                                                                                              |      |       |      |      |   |   | 3 | AEMLEIVQAIYKM[147]VSSVM[147]KMPDESTPEK                                               | 1           |
|                                                                                                                                                                                                                                                                              |      |       |      |      |   |   | 3 | PTMPSGEWAPQSSAVRVTC[339]AATTSAM[147]NRPVQGGMIR                                       | 1           |
|                                                                                                                                                                                                                                                                              |      |       |      |      |   |   | 2 | GQGLNMTPSMVAPSGMPATM[147]SNPR                                                        | 1           |
|                                                                                                                                                                                                                                                                              |      |       |      |      |   |   | 3 | ETNDPNLPPAVSSER                                                                      | 1           |
| NCOA2_HUMAN (Q15596) Nuclear receptor coactivator 2 (NCoA-2) (Transcriptional intermediary factor 2) [MASS=159156]                                                                                                                                                           | *    | 13.73 | *    | *    | * | 8 | 2 | EQEKAANANIDEVQKSDVSSTGQGVIDK                                                         | 1           |
|                                                                                                                                                                                                                                                                              |      |       |      |      |   |   | 3 | LLQDSSSPVDLAKLTAEATGKDLSQESSSTAPGSEVTIK                                              | 1           |
|                                                                                                                                                                                                                                                                              |      |       |      |      |   |   | 1 | PSYATLRMQPRPGLR                                                                      | 1           |
|                                                                                                                                                                                                                                                                              |      |       |      |      |   |   | 2 | MNSPSPQSSPGM[147]NPGQPTSMLSPR                                                        | 1           |
|                                                                                                                                                                                                                                                                              |      |       |      |      |   |   | 2 | LIRSQTTNEPQLVISLHM[147]LHR                                                           | 1           |
| NCOA3_HUMAN (Q9Y6Q9) Nuclear receptor coactivator 3 (EC 2.3.1.48) (NCoA-3) (Thyroid hormone receptor activator molecule 1) (TRAM-1) (ACTR) (Receptor-associated coactivator 3) (RAC-3) (Amplified in breast cancer-1 protein) (AIB-1) (Steroid receptor coacti [MASS=155292] | *    | 9.83  | *    | *    | * | 6 | 2 | PPM[147]AGC[339]NSSVGGMSM[147]SPNQGLQMPSSR                                           | 1           |
|                                                                                                                                                                                                                                                                              |      |       |      |      |   |   | 2 | M[147]GPSQNPMMQHPQAASIYQSSEMK                                                        | 1           |
|                                                                                                                                                                                                                                                                              |      |       |      |      |   |   | 2 | DTSSITSC[330]GDGNVVKQEQLSPK                                                          | 1           |
|                                                                                                                                                                                                                                                                              |      |       |      |      |   |   | 2 | MSGLGENLDPLASDSRKR                                                                   | 1           |
|                                                                                                                                                                                                                                                                              |      |       |      |      |   |   | 2 | SNSIPGARPVLQQQQMLQMR                                                                 | 1           |
|                                                                                                                                                                                                                                                                              |      |       |      |      |   |   | 3 | TFPSNPESFITRHDLSGKVVNIDTNSLR                                                         | 1           |

|                                                                                                                                                                                                                                                                               |      |       |      |      |   |   |                       |                                                                                                                       |                       |
|-------------------------------------------------------------------------------------------------------------------------------------------------------------------------------------------------------------------------------------------------------------------------------|------|-------|------|------|---|---|-----------------------|-----------------------------------------------------------------------------------------------------------------------|-----------------------|
| NCOA4_HUMAN (Q13772) Nuclear receptor coactivator 4 (NCoA-4) (70 kDa androgen receptor coactivator) (70 kDa AR-activator) (Ret-activating protein ELE1) [MASS=69726]                                                                                                          | 0.00 | 3.26  | 0.21 | 0.00 | 1 | 1 | 3                     | SPM[147]NTSWC[330]SFNTADWVLP GK                                                                                       | 1                     |
| NCOA6_HUMAN (Q14686) Nuclear receptor coactivator 6 (Amplified in breast cancer protein 3) (Cancer-amplified transcriptional coactivator ASC-2) (Activating signal cointegrator 2) (ASC-2) (Peroxisome proliferator-activated receptor-interacting protein) (P [MASS=219117]) | *    | 2.28  | *    | *    | * | 3 | 2<br>2<br>3           | LPVSNVHPPRGPLNPDSQR<br>SPVSSSKGK<br>AVPAQEVKM[147]VVPEDQSKK                                                           | 1<br>1<br>1           |
| NCOR1_HUMAN (O75376) Nuclear receptor corepressor 1 (N-CoR1) (N-CoR) [MASS=270208]                                                                                                                                                                                            | *    | 3.65  | *    | *    | * | 5 | 2<br>2<br>2<br>2<br>2 | PYNSASMSPGHPTHAAAAAERERER<br>GSPMM[147]NRTSDVTISSNK<br>RPSLLSEFHGSDR<br>VPENHASK<br>GSPM[147]M[147]NRTSDVTISSNKSTNHER | 1<br>1<br>1<br>1<br>1 |
| NDRG2_HUMAN (Q9UN36) Protein NDRG2 (Protein Syld709613) [MASS=40798]                                                                                                                                                                                                          | 1.00 | 11.86 | 0.78 | 0.06 | 3 | 2 | 2<br>3<br>2           | C[330]PVMLVVG DQAPHEDAVVEC[330]NSK<br>C[339]PVM[147]LVVGDQAPHEDAVVEC[339]NSK<br>SC[330]FQPLFQFEDM[147]QEIIQNFVR       | 1<br>1<br>1           |
| NDUA2_HUMAN (O43678) NADH dehydrogenase [ubiquinone] 1 alpha subcomplex subunit 2 (EC 1.6.5.3) (EC 1.6.99.3) (NADH-ubiquinone oxidoreductase B8 subunit) (Complex I-B8) (CI-B8) [MASS=10790]                                                                                  | 1.00 | 14.29 | 1.68 | 0.02 | 3 | 2 | 2<br>2<br>2           | EC[339]SDVQPK<br>IHLC[339]QR<br>IHLC[330]QR                                                                           | 1<br>1<br>1           |
| NDUA5_HUMAN (Q16718) NADH dehydrogenase [ubiquinone] 1 alpha subcomplex subunit 5 (EC 1.6.5.3) (EC 1.6.99.3) (NADH-ubiquinone oxidoreductase 13 kDa-B subunit) (Complex I-13Kd-B) (CI-13Kd-B) (Complex I subunit B13) [MASS=13327]                                            | 1.00 | 13.91 | 1.62 | 0.01 | 3 | 1 | 2<br>2                | TTGLVGLAVC[339]NTPHER<br>TTGLVGLAVC[330]NTPHER                                                                        | 2<br>1                |
| NDUA7_HUMAN (O95182) NADH dehydrogenase [ubiquinone] 1 alpha subcomplex subunit 7 (EC 1.6.5.3) (EC 1.6.99.3) (NADH-ubiquinone oxidoreductase subunit B14.5a) (Complex I-B14.5a) (CI-B14.5a) [MASS=12420]                                                                      | 0.99 | 8.04  | 2.68 | 0.00 | 1 | 1 | 2                     | LSNNYYC[339]TR                                                                                                        | 1                     |



|                                                                                                                                                                                                                                 |      |       |      |      |   |   |   |                                       |   |
|---------------------------------------------------------------------------------------------------------------------------------------------------------------------------------------------------------------------------------|------|-------|------|------|---|---|---|---------------------------------------|---|
| NDUA8_HUMAN (P51970) NADH dehydrogenase [ubiquinone] 1 alpha subcomplex subunit 8 (EC 1.6.5.3) (EC 1.6.99.3) (NADH-ubiquinone oxidoreductase 19 kDa subunit) (Complex I-19KD) (CI-19KD) (Complex I-PGIV) (CI-PGIV) [MASS=19974] | 1.00 | 36.84 | 1.66 | 0.01 | 2 | 5 | 3 | EFM[147]LC[330]RWEKDPK                | 1 |
|                                                                                                                                                                                                                                 |      |       |      |      |   |   | 3 | AAAHHYGAQC[339]DKPNK                  | 1 |
|                                                                                                                                                                                                                                 |      |       |      |      |   |   | 1 | C[339]LEEGK                           | 1 |
|                                                                                                                                                                                                                                 |      |       |      |      |   |   | 3 | AAAHHYGAQC[330]DKPNKEFM[147]LC[330]R  | 1 |
|                                                                                                                                                                                                                                 |      |       |      |      |   |   | 1 | FDEC[339]VLDK                         | 1 |
| NDUA9_HUMAN (Q16795) NADH dehydrogenase [ubiquinone] 1 alpha subcomplex subunit 9, mitochondrial precursor (EC 1.6.5.3) (EC 1.6.99.3) (NADH-ubiquinone oxidoreductase 39 kDa subunit) (Complex I-39KD) (CI-39KD) [MASS=42509]   | 0.85 | 5.04  | *    | *    | * | 1 | 2 | SSVSGIVATVFGATGFLGR                   | 1 |
|                                                                                                                                                                                                                                 |      |       |      |      |   |   | 2 | QC[339]VDHYNEVK                       | 1 |
| NDUAA_HUMAN (O95299) NADH dehydrogenase [ubiquinone] 1 alpha subcomplex subunit 10, mitochondrial precursor (EC 1.6.5.3) (EC 1.6.99.3) (NADH-ubiquinone oxidoreductase 42 kDa subunit) (Complex I-42KD) (CI-42KD) [MASS=40750]  | 1.00 | 24.23 | 1.64 | 0.03 | 9 | 5 | 2 | TFLPEM[147]SEKC[339]EVLQYSAR          | 1 |
|                                                                                                                                                                                                                                 |      |       |      |      |   |   | 2 | KQC[339]VDHYNEVK                      | 1 |
|                                                                                                                                                                                                                                 |      |       |      |      |   |   | 3 | HFPEAGIHYPDSTTGDGKPLATDYNGNC[330]SLEK | 2 |
|                                                                                                                                                                                                                                 |      |       |      |      |   |   | 3 | HFPEAGIHYPDSTTGDGKPLATDYNGNC[339]SLEK | 2 |
|                                                                                                                                                                                                                                 |      |       |      |      |   |   | 2 | KQC[330]VDHYNEVK                      | 1 |
|                                                                                                                                                                                                                                 |      |       |      |      |   |   | 2 | QC[330]VDHYNEVK                       | 1 |
| NDUAB_HUMAN (Q86Y39) NADH dehydrogenase [ubiquinone] 1 alpha subcomplex subunit 11 (EC 1.6.5.3) (EC 1.6.99.3) (NADH-ubiquinone oxidoreductase subunit B14.7) (Complex I-B14.7) (CI-B14.7) [MASS=14721]                          | 0.38 | 15.71 | 1.06 | 0.00 | 1 | 1 | 2 | THNYGIGAAAC[339]VYFGIAASLVK           | 1 |
|                                                                                                                                                                                                                                 |      |       |      |      |   |   | 2 | DYC[330]AHHLIR                        | 2 |
| NDUB7_HUMAN (P17568) NADH dehydrogenase [ubiquinone] 1 beta subcomplex subunit 7 (EC 1.6.5.3) (EC 1.6.99.3) (NADH-ubiquinone oxidoreductase B18 subunit) (Complex I-B18) (CI-B18) (Cell adhesion protein SQM1) [MASS=16271]     | 1.00 | 27.94 | 1.72 | 0.04 | 9 | 3 | 3 | EMVATQQEM[147]MDAQLRLQLR              | 1 |
|                                                                                                                                                                                                                                 |      |       |      |      |   |   | 1 | DSFPNFLAC[339]K                       | 1 |
|                                                                                                                                                                                                                                 |      |       |      |      |   |   | 1 | DSFPNFLAC[330]K                       | 1 |
|                                                                                                                                                                                                                                 |      |       |      |      |   |   | 2 | DSFPNFLAC[339]K                       | 1 |
|                                                                                                                                                                                                                                 |      |       |      |      |   |   | 2 | DYC[339]AHHLIR                        | 3 |
|                                                                                                                                                                                                                                 |      |       |      |      |   |   | 1 | DYC[339]AHHLIR                        | 1 |

|                                                                                                                                                                                                    |      |      |      |      |   |   |   |                                        |    |
|----------------------------------------------------------------------------------------------------------------------------------------------------------------------------------------------------|------|------|------|------|---|---|---|----------------------------------------|----|
| NDUB9_HUMAN (Q9Y6M9) NADH dehydrogenase [ubiquinone] 1 beta subcomplex subunit 9 (EC 1.6.5.3) (EC 1.6.99.3) (NADH-ubiquinone oxidoreductase B22 subunit) (Complex I-B22) (CI-B22) [MASS=21700]     | 0.57 | 2.81 | 1.74 | 0.00 | 1 | 1 | 2 | YDC[339]YK                             | 1  |
| NDUBA_HUMAN (O96000) NADH dehydrogenase [ubiquinone] 1 beta subcomplex subunit 10 (EC 1.6.5.3) (EC 1.6.99.3) (NADH-ubiquinone oxidoreductase PDSW subunit) (Complex I-PDSW) (CI-PDSW) [MASS=20645] | 1.00 | 6.43 | 1.72 | 0.01 | 3 | 1 | 2 | EGQNYQQNC[330]IK                       | 1  |
|                                                                                                                                                                                                    |      |      |      |      |   |   | 2 | EGQNYQQNC[339]IK                       | 2  |
| NEGR1_HUMAN (Q7Z3B1) Neuronal growth regulator 1 precursor [MASS=38719]                                                                                                                            | 0.99 | 7.91 | 0.75 | 0.00 | 1 | 1 | 3 | DYSLQIQNVDTVDDGPYTC[330]SVQQTQHTPR     | 1  |
| NEK4_HUMAN (P51957) Serine/threonine-protein kinase Nek4 (EC 2.7.11.1) (NimA-related protein kinase 4) (Serine/threonine-protein kinase 2) (Serine/threonine-protein kinase NRK2) [MASS=94571]     | 0.00 | 5.23 | 0.19 | 0.00 | 1 | 3 | 2 | KASLSVAGPGKPQEEDQPLPAR                 | 1  |
|                                                                                                                                                                                                    |      |      |      |      |   |   | 3 | RQISFFLEATK                            | 2  |
|                                                                                                                                                                                                    |      |      |      |      |   |   | 2 | LSSDC[330]SVTQER                       | 1  |
| NELFB_HUMAN (Q8WX92) Negative elongation factor B (NELF-B) (Cofactor of BRCA1) [MASS=65697]                                                                                                        | *    | 9.83 | *    | *    | * | 3 | 2 | LYDM[147]VLQFLRTLFLRTR                 | 1  |
|                                                                                                                                                                                                    |      |      |      |      |   |   | 3 | SFSLVKMPSLQPVVM[147]C[339]VM[147]KHLPK | 1  |
|                                                                                                                                                                                                    |      |      |      |      |   |   | 2 | ELYSQLGEKLEQLDHRK                      | 1  |
| NET2_HUMAN (O00634) Netrin-2-like protein precursor [MASS=61466]                                                                                                                                   | 0.00 | 1.72 | 0.08 | 0.00 | 1 | 1 | 2 | HGTEGPDC[330]GR                        | 1  |
|                                                                                                                                                                                                    |      |      |      |      |   |   | 3 | DAPTIQQSSPGSSLR                        | 12 |
| NEUR3_HUMAN (Q9UQ49) Sialidase-3 (EC 3.2.1.18) (Membrane sialidase) (Ganglioside sialidase) (N-acetyl-alpha-neuraminidase 3) [MASS=48252]                                                          | *    | 3.50 | *    | *    | * | 1 |   |                                        |    |
| NFAC1_HUMAN (O95644) Nuclear factor of activated T-cells, cytoplasmic 1 (NFAT transcription complex cytosolic component) (NF-ATc1) (NF-ATc) [MASS=101242]                                          | 0.00 | 3.18 | 0.72 | 0.00 | 1 | 1 | 3 | IEITSC[339]LGLYHNNNQFFHDEVEDVLPSSK     | 1  |

|                                                                                                                                                                               |      |       |      |      |   |   |   |                                   |    |
|-------------------------------------------------------------------------------------------------------------------------------------------------------------------------------|------|-------|------|------|---|---|---|-----------------------------------|----|
| NFASC_HUMAN (O94856) Neurofascin precursor [MASS=150026]                                                                                                                      | 1.00 | 3.71  | 1.18 | 0.20 | 3 | 4 | 2 | RETREAWNNVTWWSR                   | 1  |
|                                                                                                                                                                               |      |       |      |      |   |   | 2 | RGTTVQLEC[330]R                   | 1  |
|                                                                                                                                                                               |      |       |      |      |   |   | 2 | DNILIEC[330]EAK                   | 1  |
|                                                                                                                                                                               |      |       |      |      |   |   | 2 | LDC[330]PFFGSPITLR                | 1  |
| NFIB_HUMAN (O00712) Nuclear factor 1 B-type (Nuclear factor 1/B) (NF1-B) (NFI-B) (NF-I/B) (CCAAT-box-binding transcription factor) (CTF) (TGGCA-binding protein) [MASS=47442] | *    | 3.33  | *    | *    | * | 1 | 2 | HPC[339]C[339]VLSNPDQK GK         | 2  |
| NFIC_HUMAN (P08651) Nuclear factor 1 C-type (Nuclear factor 1/C) (NF1-C) (NFI-C) (NF-I/C) (CCAAT-box-binding transcription factor) (CTF) (TGGCA-binding protein) [MASS=55675] | 0.00 | 14.76 | 0.19 | 0.00 | 1 | 4 | 2 | MPSHC[339]LSAQMLAPPPPGLPRLALPPATK | 1  |
|                                                                                                                                                                               |      |       |      |      |   |   | 2 | TLPSTSSSGSKR                      | 1  |
|                                                                                                                                                                               |      |       |      |      |   |   | 3 | MPSHC[339]LSAQM[147]LAPPPPGLPR    | 1  |
|                                                                                                                                                                               |      |       |      |      |   |   | 2 | KAPGC[330]VLSNPDQK GK             | 1  |
|                                                                                                                                                                               |      |       |      |      |   |   | 2 | VVTKTVEK                          | 1  |
|                                                                                                                                                                               |      |       |      |      |   |   | 2 | PPITISSKIQK                       | 2  |
|                                                                                                                                                                               |      |       |      |      |   |   | 3 | SYTLDSLGNPSAYR                    | 14 |
| NFM_HUMAN (P07197) Neurofilament triplet M protein (160 kDa neurofilament protein) (Neurofilament medium polypeptide) (NF-M) (Neurofilament 3) [MASS=102316]                  | *    | 5.14  | *    | *    | * | 4 |   |                                   |    |
|                                                                                                                                                                               |      |       |      |      |   |   | 3 | ELRATLEM[147]VNHEK                | 1  |
| NFS1_HUMAN (Q9Y697) Cysteine desulfurase, mitochondrial precursor (EC 2.8.1.7) [MASS=50195]                                                                                   | 0.96 | 3.94  | 1.45 | 0.00 | 1 | 2 | 2 | C[339]IQHVK                       | 1  |
|                                                                                                                                                                               |      |       |      |      |   |   | 2 | QQVASLIGADPR                      | 1  |
| NIPM_HUMAN (O43920) NADH-ubiquinone oxidoreductase 15 kDa subunit (EC 1.6.5.3) (EC 1.6.99.3) (Complex I-15 kDa) (CI-15 kDa) [MASS=12386]                                      | *    | 15.24 | *    | *    | * | 1 | 2 | WLTIQSGEQPYKM[147]AGR             | 1  |
| NIPS1_HUMAN (Q9BPW8) Protein NipSnap1 [MASS=33310]                                                                                                                            | 0.41 | 4.93  | 0.70 | 0.00 | 1 | 1 | 2 | FSGGYPALMDC[339]M[147]NK          | 1  |

|                                                                                                                                                                                               |      |       |      |      |   |   |   |                                                 |                                    |   |
|-----------------------------------------------------------------------------------------------------------------------------------------------------------------------------------------------|------|-------|------|------|---|---|---|-------------------------------------------------|------------------------------------|---|
|                                                                                                                                                                                               |      |       |      |      |   |   |   | 3                                               | LQFHNVKPEC[339]LEAYNKIC[339]QEVLPK | 1 |
|                                                                                                                                                                                               |      |       |      |      |   |   |   | 2                                               | IC[339]QEVLPK                      | 1 |
|                                                                                                                                                                                               |      |       |      |      |   |   |   | 2                                               | LQFHNVKPEC[339]LEAYNK              | 2 |
| NIPS2_HUMAN (O75323) Protein NipSnap2<br>(Glioblastoma amplified sequence)<br>[MASS=33742]                                                                                                    | 1.00 | 16.78 | 1.68 | 0.04 | 9 | 3 | 3 | LQFHNVKPEC[339]LEAYNK                           | 2                                  |   |
|                                                                                                                                                                                               |      |       |      |      |   |   | 3 | LQFHNVKPEC[330]LEAYNK                           | 1                                  |   |
|                                                                                                                                                                                               |      |       |      |      |   |   | 2 | LQFHNVKPEC[330]LEAYNK                           | 2                                  |   |
| NIT1_HUMAN (Q86X76) Nitrilase homolog 1<br>(EC 3.5.-.-) [MASS=35896]                                                                                                                          | *    | 2.75  | *    | *    | * | 1 | 2 | RHLPVFQHR                                       | 1                                  |   |
| NKTR_HUMAN (P30414) NK-tumor recognition<br>protein (Natural-killer cells cyclophilin-related<br>protein) (NK-TR protein) [MASS=165675]                                                       | *    | 2.05  | *    | *    | * | 2 | 2 | NQESSSDEQTPSR                                   | 1                                  |   |
|                                                                                                                                                                                               |      |       |      |      |   |   | 3 | M[147]GAQDRPQC[330]HFDIEINR                     | 1                                  |   |
| NNTM_HUMAN (Q13423) NAD(P)<br>transhydrogenase, mitochondrial precursor (EC<br>1.6.1.2) (Pyridine nucleotide transhydrogenase)<br>(Nicotinamide nucleotide transhydrogenase)<br>[MASS=113895] | 1.00 | 3.78  | 1.41 | 0.05 | 7 | 4 | 2 | TC[339]DALQAK                                   | 1                                  |   |
|                                                                                                                                                                                               |      |       |      |      |   |   | 2 | LFAQQC[339]K                                    | 1                                  |   |
|                                                                                                                                                                                               |      |       |      |      |   |   | 2 | KTC[339]DALQAK                                  | 2                                  |   |
|                                                                                                                                                                                               |      |       |      |      |   |   | 2 | EANSIIITPGYGLC[339]AAK                          | 2                                  |   |
|                                                                                                                                                                                               |      |       |      |      |   |   | 2 | KTC[330]DALQAK                                  | 1                                  |   |
| NO55_HUMAN (Q92791) Nucleolar<br>autoantigen No55 [MASS=50381]                                                                                                                                | 0.00 | 3.43  | 2.59 | 0.00 | 1 | 1 | 2 | C[339]LAGC[339]EGAHEQVDFK                       | 1                                  |   |
| NOL11_HUMAN (Q9H8H0) Nucleolar protein<br>11 [MASS=81123]                                                                                                                                     | *    | 0.83  | *    | *    | * | 1 | 1 | KFLALK                                          | 1                                  |   |
| NOL1_HUMAN (P46087) Proliferating-cell<br>nucleolar antigen p120 (Proliferation-<br>associated nucleolar protein p120)<br>[MASS=94078]                                                        | 0.00 | 2.92  | 0.34 | 0.00 | 1 | 2 | 3 | GLSLPLC[330]LPSVPAAPHQQR                        | 1                                  |   |
|                                                                                                                                                                                               |      |       |      |      |   |   | 1 | KVAFLR                                          | 1                                  |   |
|                                                                                                                                                                                               |      |       |      |      |   |   | 3 | IIKVQKDESSTGSLAM[147]STR                        | 1                                  |   |
| NOL8_HUMAN (Q76FK4) Nucleolar protein 8<br>(Nucleolar protein Nop132) [MASS=131616]                                                                                                           | *    | 5.91  | *    | *    | * | 4 | 3 | AGQKLM[147]DLQSHFGTDDR                          | 1                                  |   |
|                                                                                                                                                                                               |      |       |      |      |   |   | 2 | LQGSDLFWR                                       | 1                                  |   |
|                                                                                                                                                                                               |      |       |      |      |   |   | 2 | LPEVSKEMYNIAMDLEIFQTTK                          | 1                                  |   |
| NOP5_HUMAN (Q9Y2X3) Nucleolar protein<br>NOP5 (Nucleolar protein 5) (NOP58)<br>[MASS=59578]                                                                                                   | *    | 4.16  | *    | *    | * | 1 | 2 | EEPLSEEEPC[330]TSTAIASPEKKK                     | 1                                  |   |
| NOTC3_HUMAN (Q9UM47) Neurogenic locus<br>notch homolog protein 3 precursor (Notch 3)<br>[Contains: Notch 3 extracellular truncation;<br>Notch 3 intracellular domain] [MASS=243659]           | 0.00 | 2.33  | 0.06 | 0.00 | 1 | 3 | 3 | C[330]DQGC[339]NTEEC[339]GWDGLDC[330]ASEVPALLAR | 1                                  |   |
|                                                                                                                                                                                               |      |       |      |      |   |   | 3 | C[339]VNTQGSFLC[330]QC[339]GR                   | 1                                  |   |
|                                                                                                                                                                                               |      |       |      |      |   |   | 2 | HGGTC[330]LNTPGSFR                              | 1                                  |   |

NOTC4\_HUMAN (Q99466) Neurogenic locus notch homolog protein 4 precursor (Notch 4) (hNotch4) [Contains: Notch 4 extracellular truncation; Notch 4 intracellular domain] [MASS=209621]

\* 0.55 \* \* \* 1

3 C[330]SC[339]PHSSPGPR 1

NPFF2\_HUMAN (Q9Y5X5) Neuropeptide FF receptor 2 (Neuropeptide G-protein coupled receptor) (G-protein coupled receptor 74) (G-protein coupled receptor HLWAR77) [MASS=60270]

0.00 2.68 2.31 0.00 1 1

2 RGFQEAFQLQLC[330]QK 1

2 SENKNEGQDATM[147]YC[330]K 2

NPTN\_HUMAN (Q9Y639) Neuroplastin precursor (Stromal cell-derived receptor 1) (SDR-1) [MASS=31291]

1.00 17.38 0.44 0.21 5 3

2 AEDSGEYHC[339]VYHFVSAPK 1

2 AEDSGEYHC[330]VYHFVSAPK 1

3 RSENKNEGQDATM[147]YC[330]K 1

NR1H4\_HUMAN (Q96R11) Bile acid receptor (Farnesoid X-activated receptor) (Farnesol receptor HRR-1) (Retinoid X receptor-interacting protein 14) (RXR-interacting protein 14) [MASS=55914]

\* 9.47 \* \* \* 2

2 EKTELTPDQQTLLHFIM[147]DSYNKQR 1

3 C[330]KEMGM[147]LAEC[330]MYTGLLTEIQC[330]K 1

NR6A1\_HUMAN (Q15406) Orphan nuclear receptor NR6A1 (Germ cell nuclear factor) (GCNF) (Retinoid receptor-related testis-specific receptor) (RTR) [MASS=54383]

\* 4.38 \* \* \* 2

2 LLKC[330]LQMGMN 1

2 EDGMPGGRNK 1

|                                                                                                                                                                                                                                    |      |      |      |      |   |   |   |                                          |   |
|------------------------------------------------------------------------------------------------------------------------------------------------------------------------------------------------------------------------------------|------|------|------|------|---|---|---|------------------------------------------|---|
| NRG2_HUMAN (O14511) Pro-neuregulin-2, membrane-bound isoform precursor (Pro-NRG2) [Contains: Neuregulin-2 (NRG-2) (Neural- and thymus-derived activator for ERBB kinases) (NTAK) (Divergent of neuregulin-1) (DON-1)] [MASS=91678] | *    | 1.53 | *    | *    | * | 1 | 3 | VALVKVLDKWPLR                            | 3 |
| NRIP1_HUMAN (P48552) Nuclear receptor-interacting protein 1 (Nuclear factor RIP140) (Receptor-interacting protein 140) [MASS=126941]                                                                                               | 0.00 | 5.01 | 0.76 | 0.00 | 1 | 2 | 3 | LM[147]ASKSSATVFQNP[147]GIIPSSPKNAGYK    | 1 |
|                                                                                                                                                                                                                                    |      |      |      |      |   |   | 3 | WNSPPYVC[339]STQSEKLTNTASNHSM[147]DLTKSK | 1 |
| NRP2_HUMAN (O60462) Neuropilin-2 precursor (Vascular endothelial cell growth factor 165 receptor 2) [MASS=104830]                                                                                                                  | 0.00 | 6.77 | 1.77 | 0.00 | 1 | 3 | 3 | SYKLEVSTNGEDWMVYR                        | 1 |
|                                                                                                                                                                                                                                    |      |      |      |      |   |   | 3 | LEVLGC[339]DWTDSKPTVETLGPTVK             | 1 |
|                                                                                                                                                                                                                                    |      |      |      |      |   |   | 3 | ISTDVPLENC[330]MEPISAFAGENFK             | 1 |
| NSF_HUMAN (P46459) Vesicle-fusing ATPase (EC 3.6.4.6) (Vesicular-fusion protein NSF) (N-ethylmaleimide sensitive fusion protein) (NEM-sensitive fusion protein) [MASS=82654]                                                       | 1.00 | 6.05 | 0.89 | 0.01 | 2 | 3 | 2 | IDGVEQLNNILVIGMTNR                       | 1 |
|                                                                                                                                                                                                                                    |      |      |      |      |   |   | 2 | SQLSC[339]VVVDDIER                       | 1 |
|                                                                                                                                                                                                                                    |      |      |      |      |   |   | 2 | FSNLVLQALLVLLK                           | 1 |
|                                                                                                                                                                                                                                    |      |      |      |      |   |   | 2 | SQLSC[330]VVVDDIER                       | 1 |
| NTRK2_HUMAN (Q16620) BDNF/NT-3 growth factors receptor precursor (EC 2.7.10.1) (Neurotrophic tyrosine kinase receptor type 2) (TrkB tyrosine kinase) (GP145-TrkB) (Trk-B) [MASS=91998]                                             | 0.21 | 3.89 | 0.62 | 0.00 | 1 | 2 | 2 | NC[330]LVGENLLVK                         | 1 |
|                                                                                                                                                                                                                                    |      |      |      |      |   |   | 2 | VGGHTMLPIRWMPPEMIMYRK                    | 1 |
| NU205_HUMAN (Q92621) Nuclear pore complex protein Nup205 (Nucleoporin Nup205) (205 kDa nucleoporin) [MASS=227919]                                                                                                                  | *    | 1.14 | *    | *    | * | 1 | 2 | MATPLAVNSAASLWGPYKDIWHK                  | 1 |

|                                                                                                                                                                                                   |      |       |      |      |    |   |  |   |                                              |   |
|---------------------------------------------------------------------------------------------------------------------------------------------------------------------------------------------------|------|-------|------|------|----|---|--|---|----------------------------------------------|---|
|                                                                                                                                                                                                   |      |       |      |      |    |   |  | 2 | DC[330]FIIYQGHGHDVGAADIADVILPGAAYTEK         | 1 |
|                                                                                                                                                                                                   |      |       |      |      |    |   |  | 3 | DLNLRVDSDTLC[339]TEEVFPTAGAGTDLR             | 1 |
|                                                                                                                                                                                                   |      |       |      |      |    |   |  | 2 | C[330]IQC[330]TR                             | 1 |
|                                                                                                                                                                                                   |      |       |      |      |    |   |  | 2 | DC[339]FIIYQGHGHDVGAADIADVILPGAAYTEK         | 1 |
|                                                                                                                                                                                                   |      |       |      |      |    |   |  | 2 | VLFLLGADGGC[339]ITR                          | 2 |
| NUAM_HUMAN (P28331) NADH-ubiquinone oxidoreductase 75 kDa subunit, mitochondrial precursor (EC 1.6.5.3) (EC 1.6.99.3) (Complex I-75Kd) (CI-75Kd) [MASS=79467]                                     | 1.00 | 14.03 | 1.73 | 0.06 | 15 | 7 |  | 2 | LSVAGNC[339]JR                               | 1 |
|                                                                                                                                                                                                   |      |       |      |      |    |   |  | 2 | VLFLLGADGGC[330]ITR                          | 2 |
|                                                                                                                                                                                                   |      |       |      |      |    |   |  | 3 | DC[339]FIIYQGHGHDVGAADIADVILPGAAYTEK         | 2 |
|                                                                                                                                                                                                   |      |       |      |      |    |   |  | 2 | C[339]IQC[339]TR                             | 1 |
|                                                                                                                                                                                                   |      |       |      |      |    |   |  | 2 | FC[339]YHER                                  | 2 |
|                                                                                                                                                                                                   |      |       |      |      |    |   |  | 2 | VVAAC[339]AM[147]PVM[147]K                   | 1 |
|                                                                                                                                                                                                   |      |       |      |      |    |   |  | 2 | FC[330]YHER                                  | 1 |
|                                                                                                                                                                                                   |      |       |      |      |    |   |  | 2 | HESC[339]GQC[339]TPC[339]R                   | 1 |
|                                                                                                                                                                                                   |      |       |      |      |    |   |  | 2 | NAC[339]GSGYDFDFVVR                          | 2 |
|                                                                                                                                                                                                   |      |       |      |      |    |   |  | 3 | SVC[339]ETVLM[147]DFDALVQAQTGLGTAIVVM[147]DR | 1 |
|                                                                                                                                                                                                   |      |       |      |      |    |   |  | 3 | LIEFYKHESC[339]GQC[339]TPC[339]R             | 1 |
| NUBM_HUMAN (P49821) NADH-ubiquinone oxidoreductase 51 kDa subunit, mitochondrial precursor (EC 1.6.5.3) (EC 1.6.99.3) (Complex I-51KD) (CI-51KD) (NADH dehydrogenase flavoprotein 1) [MASS=50817] | 1.00 | 31.90 | 1.17 | 0.33 | 15 | 8 |  | 2 | LFNISGHVNHPC[330]TVEEEMSVPLKELIEK            | 1 |
|                                                                                                                                                                                                   |      |       |      |      |    |   |  | 2 | GAGAYIC[330]GEETALIESIEGK                    | 1 |
|                                                                                                                                                                                                   |      |       |      |      |    |   |  | 2 | YLVVNADEGEPGTC[339]KDR                       | 1 |
|                                                                                                                                                                                                   |      |       |      |      |    |   |  | 2 | LLEGC[339]LVGGR                              | 1 |
|                                                                                                                                                                                                   |      |       |      |      |    |   |  | 2 | YLVVNADEGEPGTC[330]KDR                       | 1 |
|                                                                                                                                                                                                   |      |       |      |      |    |   |  | 2 | GAGAYIC[339]GEETALIESIEGK                    | 2 |
|                                                                                                                                                                                                   |      |       |      |      |    |   |  | 3 | HESC[339]GQC[339]TPC[339]R                   | 1 |
|                                                                                                                                                                                                   |      |       |      |      |    |   |  | 2 | LLEGC[330]LVGGR                              | 1 |
|                                                                                                                                                                                                   |      |       |      |      |    |   |  | 2 | NAC[330]GSGYDFDFVVR                          | 1 |
| NUCM_HUMAN (O75306) NADH-ubiquinone oxidoreductase 49 kDa subunit, mitochondrial precursor (EC 1.6.5.3) (EC 1.6.99.3) (Complex I-49KD) (CI-49KD) [MASS=52545]                                     | 0.98 | 1.73  | 1.70 | 0.00 | 1  | 1 |  | 2 | IIAQC[339]LNK                                | 1 |
| NUD14_HUMAN (O95848) Uridine diphosphate glucose pyrophosphatase (EC 3.6.1.45) (UDPG pyrophosphatase) (UGPPase) (Nucleoside diphosphate linked moiety X motif 14) (Nudix motif 14) [MASS=24118]   | 0.00 | 9.46  | 1.30 | 0.00 | 1  | 2 |  | 2 | SWDFMK                                       | 1 |
|                                                                                                                                                                                                   |      |       |      |      |    |   |  | 2 | C[339]AASPYLRPLTLHYR                         | 1 |

|                                                                                                                                                                                                  |                               |       |      |      |   |   |   |                                       |   |
|--------------------------------------------------------------------------------------------------------------------------------------------------------------------------------------------------|-------------------------------|-------|------|------|---|---|---|---------------------------------------|---|
| NUD15_HUMAN (Q9NV35) Probable 7,8-dihydro-8-oxoguanine triphosphatase NUDT15 (EC 3.1.6.-) (8-oxo-dGTPase NUDT15) (Nucleoside diphosphate-linked moiety X motif 15) (Nudix motif 15) [MASS=18609] | *                             | 8.54  | *    | *    | * | 1 | 3 | RPGVGVGVVVVTSK[330]K                  | 1 |
| NUDT8_HUMAN (Q8WV74) Nucleoside diphosphate-linked moiety X motif 8, mitochondrial precursor (EC 3.6.1.-) (Nudix motif 8) [MASS=25370]                                                           | 0.00                          | 6.78  | 0.10 | 0.00 | 1 | 1 | 2 | ARPASAAVLVPLC[330]SVR                 | 1 |
| NUHM_HUMAN (P19404) NADH-ubiquinone oxidoreductase 24 kDa subunit, mitochondrial precursor (EC 1.6.5.3) (EC 1.6.99.3) [MASS=27391]                                                               | 1.00                          | 12.45 | 1.79 | 0.04 | 7 | 2 | 2 | FSC[339]EPAGGLTSLTEPPK                | 1 |
|                                                                                                                                                                                                  |                               |       |      |      |   |   | 2 | YHIQVC[339]TTTPC[339]M[147]LR         | 2 |
|                                                                                                                                                                                                  |                               |       |      |      |   |   | 2 | YHIQVC[330]TTTPC[330]MLR              | 1 |
|                                                                                                                                                                                                  |                               |       |      |      |   |   | 2 | YHIQVC[339]TTTPC[339]MLR              | 1 |
|                                                                                                                                                                                                  |                               |       |      |      |   |   | 3 | YHIQVC[339]TTTPC[339]M[147]LR         | 1 |
| 2                                                                                                                                                                                                | YHIQVC[330]TTTPC[330]M[147]LR | 1     |      |      |   |   |   |                                       |   |
| NUIM_HUMAN (O00217) NADH-ubiquinone oxidoreductase 23 kDa subunit, mitochondrial precursor (EC 1.6.5.3) (EC 1.6.99.3) (Complex I-23KD) (CI-23KD) (TYKY subunit) [MASS=23705]                     | 1.00                          | 22.86 | 2.05 | 0.02 | 4 | 4 | 2 | C[339]IAC[339]K                       | 2 |
|                                                                                                                                                                                                  |                               |       |      |      |   |   | 2 | C[330]IAC[330]K                       | 1 |
|                                                                                                                                                                                                  |                               |       |      |      |   |   | 2 | LC[339]EAIC[339]PAQAITIEAEPR          | 1 |
|                                                                                                                                                                                                  |                               |       |      |      |   |   | 2 | M[147]RC[330]LTPMLLRALAQAAR           | 1 |
|                                                                                                                                                                                                  |                               |       |      |      |   |   | 1 | GEHALRR                               | 1 |
| NUKM_HUMAN (O75251) NADH-ubiquinone oxidoreductase 20 kDa subunit, mitochondrial precursor (EC 1.6.5.3) (EC 1.6.99.3) (Complex I-20KD) (CI-20KD) (PSST subunit) [MASS=23563]                     | 1.00                          | 12.68 | 1.88 | 0.04 | 4 | 1 | 2 | IVPVDIYIPGC[339]PPTAEALLYGILQLQR      | 1 |
|                                                                                                                                                                                                  |                               |       |      |      |   |   | 3 | IVPVDIYIPGC[339]PPTAEALLYGILQLQR      | 3 |
|                                                                                                                                                                                                  |                               |       |      |      |   |   | 2 | VIAC[330]DGGGGALGHPK                  | 2 |
| NUMM_HUMAN (O75380) NADH-ubiquinone oxidoreductase 13 kDa-A subunit, mitochondrial precursor (EC 1.6.5.3) (EC 1.6.99.3) (Complex I-13KD-A) (CI-13KD-A) [MASS=13712]                              | 1.00                          | 21.77 | 1.44 | 0.03 | 7 | 2 | 2 | VIAC[339]DGGGGALGHPK                  | 2 |
|                                                                                                                                                                                                  |                               |       |      |      |   |   | 2 | TGTC[330]GYC[330]GLQFR                | 1 |
|                                                                                                                                                                                                  |                               |       |      |      |   |   | 2 | TGTC[339]GYC[339]GLQFR                | 1 |
|                                                                                                                                                                                                  |                               |       |      |      |   |   | 1 | VIAC[339]DGGGGALGHPK                  | 1 |
| NXT1_HUMAN (Q9UKK6) NTF2-related export protein 1 (p15 protein) [MASS=15847]                                                                                                                     | 0.00                          | 19.29 | 0.19 | 0.00 | 1 | 1 | 2 | DFNQNFILTAQASPSNTVWKIASDC[330]FR      | 1 |
| O10AG_HUMAN (Q8NH19) Olfactory receptor 10AG1 (Olfactory receptor OR11-160) [MASS=34105]                                                                                                         | 0.00                          | 10.96 | 0.69 | 0.00 | 1 | 1 | 3 | AFSTC[330]SSHLIVILFFGAGTITYLQPKPHQFQR | 1 |



|                                                                                                                                                                                                                                                                             |      |       |      |      |   |   |   |                                               |   |
|-----------------------------------------------------------------------------------------------------------------------------------------------------------------------------------------------------------------------------------------------------------------------------|------|-------|------|------|---|---|---|-----------------------------------------------|---|
| O10H3_HUMAN (O60404) Olfactory receptor 10H3 [MASS=35721]                                                                                                                                                                                                                   | 0.00 | 8.54  | 3.78 | 0.00 | 1 | 1 | 2 | TFSTC[339]VSHLTVVVM[147]HYSFASLIYLKPK         | 1 |
| O10H5_HUMAN (Q8NGA6) Olfactory receptor 10H5 [MASS=34900]                                                                                                                                                                                                                   | 0.00 | 8.89  | *    | *    | * | 1 | 3 | VGC[330]SWAGGLVM[147]GMVVTS AIFHLAFC[330]GHK  | 1 |
| O11G2_HUMAN (Q8NGC1) Olfactory receptor 11G2 [MASS=34933]                                                                                                                                                                                                                   | *    | 24.76 | *    | *    | * | 3 | 3 | KAFSTC[330]GSHLAVVSLFYGSLVLM[147]YGSPPSKNEAGK | 1 |
|                                                                                                                                                                                                                                                                             |      |       |      |      |   |   | 2 | KGPVIELVFSVLSPLPVFMLFLFIVGSYALVVR             | 1 |
|                                                                                                                                                                                                                                                                             |      |       |      |      |   |   | 1 | VPSAAGRRK                                     | 1 |
| O2T35_HUMAN (Q8NGX2) Olfactory receptor 2T35 (Olfactory receptor OR1-66) [MASS=36101]                                                                                                                                                                                       | *    | 4.64  | *    | *    | * | 1 | 3 | C[339]GSSQSIRVATVIRK                          | 1 |
| O51V1_HUMAN (Q9H2C8) Olfactory receptor 51V1 (Odorant receptor HOR3'beta1) (Olfactory receptor OR11-36) [MASS=36882]                                                                                                                                                        | 0.00 | 6.54  | 1.03 | 0.00 | 1 | 1 | 2 | IGLTIIGRSFFFITPPIIC[330]LK                    | 1 |
| ODB2_HUMAN (P11182) Lipoamide acyltransferase component of branched-chain alpha-keto acid dehydrogenase complex, mitochondrial precursor (EC 2.3.1.168) (Dihydrolipoyllysine-residue (2-methylpropanoyl)transferase) (E2) (Dihydrolipoamide branched chain tra [MASS=53487] | *    | 5.39  | *    | *    | * | 1 | 2 | EGDTV SQFDSIC[339]EVQSDKASVTISR               | 1 |
| ODP2_HUMAN (P10515) Dihydrolipoyllysine-residue acetyltransferase component of pyruvate dehydrogenase complex, mitochondrial precursor (EC 2.3.1.12) (Pyruvate dehydrogenase complex E2 subunit) (PDCE2) (E2) (Dihydrolipoamide S-acetyltransferase component [MASS=65781]  | 1.00 | 14.33 | 1.50 | 0.01 | 3 | 4 | 1 | DVPLGTPLC[339]IIVEK                           | 1 |
|                                                                                                                                                                                                                                                                             |      |       |      |      |   |   | 2 | DVPIGAIIC[330]ITVGKPEDIEAFK                   | 1 |
|                                                                                                                                                                                                                                                                             |      |       |      |      |   |   | 3 | NFSAIINPPQAC[330]ILAIGASEDKLVPADNEK           | 1 |
|                                                                                                                                                                                                                                                                             |      |       |      |      |   |   | 2 | NFSAIINPPQAC[330]ILAIGASEDK                   | 1 |
|                                                                                                                                                                                                                                                                             |      |       |      |      |   |   | 2 | C[339]DLHR                                    | 2 |
| ODPA_HUMAN (P08559) Pyruvate dehydrogenase E1 component alpha subunit, somatic form, mitochondrial precursor (EC 1.2.4.1) (PDHE1-A type I) [MASS=43295]                                                                                                                     | 1.00 | 15.90 | 1.77 | 0.03 | 6 | 5 | 2 | KC[339]DLHR                                   | 1 |
|                                                                                                                                                                                                                                                                             |      |       |      |      |   |   | 3 | GGC[339]AKGKGGSMHM[147]YAK                    | 1 |
|                                                                                                                                                                                                                                                                             |      |       |      |      |   |   | 2 | LPC[339]IFIC[339]ENNR                         | 1 |
|                                                                                                                                                                                                                                                                             |      |       |      |      |   |   | 2 | NFYGGNGIVGAQVPLGAGIALAC[339]K                 | 1 |
|                                                                                                                                                                                                                                                                             |      |       |      |      |   |   | 2 | KC[330]DLHR                                   | 1 |
|                                                                                                                                                                                                                                                                             |      |       |      |      |   |   | 1 | C[339]DLHR                                    | 1 |

|                                                                                                                                                                                                                                                                             |      |       |      |      |   |   |                                                                                                                                                                                                                                 |                                           |
|-----------------------------------------------------------------------------------------------------------------------------------------------------------------------------------------------------------------------------------------------------------------------------|------|-------|------|------|---|---|---------------------------------------------------------------------------------------------------------------------------------------------------------------------------------------------------------------------------------|-------------------------------------------|
| ODPB_HUMAN (P11177) Pyruvate dehydrogenase E1 component subunit beta, mitochondrial precursor (EC 1.2.4.1) (PDHE1-B) [MASS=39219]                                                                                                                                           | 0.00 | 19.50 | 0.87 | 0.07 | 2 | 3 | 2 PVGHC[330]LEAAAVLSK<br>3 EGVEC[330]EVINM[147]RTIRPM[147]DM[147]ETIEASVMK<br>2 YGDKRIIDTPISEMGFAGIIVGAAMAGLR<br>2 PVGHC[339]LEAAAVLSK                                                                                          | 1<br>1<br>1<br>1                          |
| ODPX_HUMAN (O00330) Pyruvate dehydrogenase protein X component, mitochondrial precursor (Dihydrolipoamide dehydrogenase-binding protein of pyruvate dehydrogenase complex) (Lipoyl-containing pyruvate dehydrogenase complex component X) (E3-binding protein) [MASS=54122] | 0.77 | 7.98  | 2.21 | 0.00 | 1 | 2 | 2 STVPHAYATADC[339]DLGAVLK<br>3 ILM[147]PSLSPTMEEGNIVKWLKK                                                                                                                                                                      | 1<br>1                                    |
| OGT1_HUMAN (O15294) UDP-N-acetylglucosamine--peptide N-acetylglucosaminyltransferase 110 kDa subunit (EC 2.4.1.-) (O-GlcNAc transferase p110 subunit) [MASS=116924]                                                                                                         | *    | 4.21  | *    | *    | * | 3 | 2 AFLDSLPLDVKIVKMK<br>2 AFLDSLPLDVKIVK<br>2 KAVIDFKSNGHIYDNR                                                                                                                                                                    | 1<br>1<br>1                               |
| OMD_HUMAN (Q99983) Osteomodulin precursor (Osteoadherin) (OSAD) (Keratan sulfate proteoglycan osteomodulin) (KSPG osteomodulin) [MASS=49492]                                                                                                                                | 0.00 | 4.04  | 1.09 | 0.00 | 1 | 1 | 2 IFAKM[147]EKLMQLNLC[330]SNR                                                                                                                                                                                                   | 1                                         |
| OMGP_HUMAN (P23515) Oligodendrocyte-myelin glycoprotein precursor [MASS=49608]                                                                                                                                                                                              | 0.99 | 3.64  | 0.71 | 0.00 | 1 | 1 | 2 AHVIGTPC[330]STQISSLK                                                                                                                                                                                                         | 1                                         |
| OPA1_HUMAN (O60313) Dynamin-like 120 kDa protein, mitochondrial precursor (Optic atrophy 1 gene protein) [MASS=111657]                                                                                                                                                      | 1.00 | 8.75  | 1.68 | 0.06 | 6 | 6 | 2 C[330]NEEHPAYLASDEITTVR<br>3 TQEQC[330]VHNETKNELEK<br>3 TQEQC[339]VHNETKNELEK<br>2 C[339]NEEHPAYLASDEITTVRK<br>2 HFRKVSDK<br>2 C[339]NEEHPAYLASDEITTVR<br>3 TALNHC[339]NLC[339]R<br>3 NFWPARLATRLLK<br>2 TALNHC[330]NLC[339]R | 1<br>1<br>1<br>1<br>1<br>1<br>1<br>1<br>1 |
| OPCM_HUMAN (Q14982) Opioid-binding protein/cell adhesion molecule precursor (OBCAM) (Opioid-binding cell adhesion molecule) (OPCML) [MASS=38007]                                                                                                                            | 1.00 | 7.83  | 0.63 | 0.20 | 4 | 2 | 2 C[330]TIDDR<br>2 DQSGEYEC[330]SALNDVAAPDVRK<br>3 DQSGEYEC[330]SALNDVAAPDVRK                                                                                                                                                   | 2<br>1<br>1                               |
| OPHN1_HUMAN (O60890) Oligophrenin 1 [MASS=91640]                                                                                                                                                                                                                            | *    | 3.49  | *    | *    | * | 1 | 2 PDIVAGNAGEITSSVVASRTRFFETASR                                                                                                                                                                                                  | 1                                         |

|                                                                                                                                                                                                                                                                             |      |       |      |      |   |   |   |                                             |   |
|-----------------------------------------------------------------------------------------------------------------------------------------------------------------------------------------------------------------------------------------------------------------------------|------|-------|------|------|---|---|---|---------------------------------------------|---|
| OPSB_HUMAN (P03999) Blue-sensitive opsin (BOP) (Blue cone photoreceptor pigment) [MASS=39135]                                                                                                                                                                               | *    | 7.76  | *    | *    | * | 1 | 3 | M[147]VVVMVGSFC[330]VC[339]YVPYAAFAMYMVNNR  | 1 |
| OR4KE_HUMAN (Q8NGD5) Olfactory receptor 4K14 (Olfactory receptor OR14-22) [MASS=35053]                                                                                                                                                                                      | 0.00 | 8.06  | 0.13 | 0.00 | 1 | 1 | 3 | ALSTC[330]SAHIMVVTLFFGPC[330]IFVYVR         | 1 |
| ORCT3_HUMAN (Q9Y226) Organic-cation transporter-like 3 (Solute carrier family 22 member 13) [MASS=60861]                                                                                                                                                                    | 0.00 | 2.18  | 2.29 | 0.00 | 1 | 1 | 2 | C[339]SSIFMMQRFGR                           | 1 |
| P5CS_HUMAN (P54886) Delta 1-pyrroline-5-carboxylate synthetase (P5CS) (Aldehyde dehydrogenase 18 family member A1) [Includes: Glutamate 5-kinase (EC 2.7.2.11) (Gamma-glutamyl kinase) (GK); Gamma-glutamyl phosphate reductase (GPR) (EC 1.2.1.41) (Glutamate [MASS=87302] | *    | 15.09 | *    | *    | * | 5 | 2 | YLHENLPIQRNTN                               | 1 |
|                                                                                                                                                                                                                                                                             |      |       |      |      |   |   | 3 | AAKGIPVMGHSEGC[339]HMYVDSEASVDKVTR          | 1 |
|                                                                                                                                                                                                                                                                             |      |       |      |      |   |   | 2 | FSDGYRFGGLGAEVGISTSR                        | 1 |
|                                                                                                                                                                                                                                                                             |      |       |      |      |   |   | 2 | DHVSDDFSEHGSLKYLHENLPIQR                    | 1 |
|                                                                                                                                                                                                                                                                             |      |       |      |      |   |   | 3 | EAAHSNRILHLLTQEALSIHGVEAVQLVNTR             | 1 |
| PACN1_HUMAN (Q9BY11) Protein kinase C and casein kinase substrate in neurons protein 1 [MASS=50965]                                                                                                                                                                         | 0.62 | 2.25  | 0.56 | 0.00 | 1 | 1 | 2 | AYHLAC[330]KEEK                             | 1 |
| PACS1_HUMAN (Q6VY07) Phosphofurin acidic cluster sorting protein 1 (PACS-1) [MASS=104898]                                                                                                                                                                                   | *    | 0.83  | *    | *    | * | 1 | 1 | YLGSVDSK                                    | 1 |
| PADI3_HUMAN (Q9ULW8) Protein-arginine deiminase type-3 (EC 3.5.3.15) (Protein-arginine deiminase type III) (Peptidylarginine deiminase III) [MASS=74743]                                                                                                                    | 0.00 | 1.66  | 0.07 | 6.20 | 2 | 1 | 2 | MLLASPGAC[330]FK                            | 3 |
| PANK4_HUMAN (Q9NVE7) Pantothenate kinase 4 (EC 2.7.1.33) (Pantothenic acid kinase 4) (hPanK4) [MASS=85990]                                                                                                                                                                  | 0.00 | 6.08  | 8.49 | 0.00 | 1 | 3 | 2 | C[330]ALIFADNSGIDIILGVFPFVR                 | 1 |
|                                                                                                                                                                                                                                                                             |      |       |      |      |   |   | 1 | SLLDTR                                      | 1 |
|                                                                                                                                                                                                                                                                             |      |       |      |      |   |   | 3 | SLLHMISNDIGQLAC[339]LHAR                    | 2 |
| PAPPA_HUMAN (Q13219) Pappalysin-1 precursor (EC 3.4.24.79) (Pregnancy-associated plasma protein-A) (PAPP-A) (Insulin-like growth factor-dependent IGF-binding protein 4 protease) (IGF-dependent IGFBP-4 protease) (IGFBP-4ase) [MASS=181140]                               | *    | 4.79  | *    | *    | * | 4 | 3 | AFKTQC[330]TQDGSWQEGAC[330]VPVTC[339]DPPPPK | 1 |
|                                                                                                                                                                                                                                                                             |      |       |      |      |   |   | 2 | YHGAQC[339]TVSC[339]RTGYVLQIRR              | 1 |

PAPPA\_HUMAN (Q13219) Pappalysin-1 precursor (EC 3.4.24.79) (Pregnancy-associated plasma protein-A) (PAPP-A) (Insulin-like growth factor-dependent IGF-binding protein 4 protease) (IGF-dependent IGFBP-4 protease) (IGFBP-4ase) [MASS=181140]

|   |      |   |   |   |   |
|---|------|---|---|---|---|
| * | 4.79 | * | * | * | 4 |
|---|------|---|---|---|---|

PAPPA\_HUMAN (Q13219) Pappalysin-1 precursor (EC 3.4.24.79) (Pregnancy-associated plasma protein-A) (PAPP-A) (Insulin-like growth factor-dependent IGF-binding protein 4 protease) (IGF-dependent IGFBP-4 protease) (IGFBP-4ase) [MASS=181140]

|   |      |   |   |   |   |   |                       |   |
|---|------|---|---|---|---|---|-----------------------|---|
| * | 4.79 | * | * | * | 4 | 2 | C[330]KVLMLGGSALNHNYR | 1 |
|---|------|---|---|---|---|---|-----------------------|---|

PAR4\_HUMAN (Q96RI0) Proteinase-activated receptor 4 precursor (PAR-4) (Thrombin receptor-like 3) (Coagulation factor II receptor-like 3) [MASS=41163]

|   |      |   |   |   |   |   |                         |   |
|---|------|---|---|---|---|---|-------------------------|---|
| * | 5.97 | * | * | * | 1 | 2 | AGLFQRSPGDTVASKASAEGGSR | 1 |
|---|------|---|---|---|---|---|-------------------------|---|

|                                                                                                                                                                                                                   |      |       |      |      |   |   |  |   |                                                |   |
|-------------------------------------------------------------------------------------------------------------------------------------------------------------------------------------------------------------------|------|-------|------|------|---|---|--|---|------------------------------------------------|---|
|                                                                                                                                                                                                                   |      |       |      |      |   |   |  | 3 | EGPYDVVVLPGGNLGAQNLSESAAVKEILK                 | 1 |
|                                                                                                                                                                                                                   |      |       |      |      |   |   |  | 2 | VTVAGLAGKDPVQC[339]SR                          | 2 |
| PARK7_HUMAN (Q99497) Protein DJ-1 (Oncogene DJ1) [MASS=19891]                                                                                                                                                     | 1.00 | 56.61 | 0.92 | 0.06 | 7 | 5 |  | 2 | VTVAGLAGKDPVQC[330]SR                          | 2 |
|                                                                                                                                                                                                                   |      |       |      |      |   |   |  | 3 | GLIAAIC[330]AGPTALLAHEIGFGSK                   | 1 |
|                                                                                                                                                                                                                   |      |       |      |      |   |   |  | 2 | DVVIC[339]PDASLEDAKK                           | 1 |
|                                                                                                                                                                                                                   |      |       |      |      |   |   |  | 2 | VTTHPLAKDKMM[147]NGGHYTYSENR                   | 1 |
|                                                                                                                                                                                                                   |      |       |      |      |   |   |  | 2 | DVVIC[330]PDASLEDAKK                           | 1 |
| PARP4_HUMAN (Q9UJK3) Poly [ADP-ribose] polymerase 4 (EC 2.4.2.30) (PARP-4) (Vault poly(ADP-ribose) polymerase) (VPARP) (193 kDa vault protein) (PARP-related/lalpal-related H5/proline-rich) (PH5P) [MASS=192587] | 0.00 | 8.76  | 0.57 | 0.00 | 1 | 8 |  | 2 | YNTLEKVGVM[147]EGGQEAVVVELQC[330]SR            | 1 |
|                                                                                                                                                                                                                   |      |       |      |      |   |   |  | 3 | RTDC[330]KAVISTM[147]EGSSLDSSGFSLHIGLSAAYLPR   | 1 |
|                                                                                                                                                                                                                   |      |       |      |      |   |   |  | 1 | EVNLGLLAKK                                     | 1 |
|                                                                                                                                                                                                                   |      |       |      |      |   |   |  | 2 | TTGTM[147]IHKLAARALIR                          | 1 |
|                                                                                                                                                                                                                   |      |       |      |      |   |   |  | 3 | TSEDASEYFENYIEELK                              | 1 |
|                                                                                                                                                                                                                   |      |       |      |      |   |   |  | 3 | KADLC[330]QLIRDMVNVVC[339]ETNLSK               | 1 |
|                                                                                                                                                                                                                   |      |       |      |      |   |   |  | 2 | M[147]M[147]TEFYRLIPHKGTM[147]PK               | 1 |
|                                                                                                                                                                                                                   |      |       |      |      |   |   |  | 1 | PVNRISLNDVSK                                   | 1 |
| PAX3_HUMAN (P23760) Paired box protein Pax-3 (HUP2) [MASS=52967]                                                                                                                                                  | 0.00 | 3.13  | *    | *    | * | 1 |  | 2 | QLRVSHGC[339]VSKILC[339]R                      | 1 |
| PAX7_HUMAN (P23759) Paired box protein Pax-7 (HUP1) [MASS=56896]                                                                                                                                                  | 0.00 | 5.77  | 2.08 | 0.00 | 1 | 2 |  | 2 | LDEGSDVESEPDLPKRRK                             | 1 |
|                                                                                                                                                                                                                   |      |       |      |      |   |   |  | 2 | MMRPAPGQNYPR                                   | 1 |
| PC11X_HUMAN (Q9BZA7) Protocadherin-11 X-linked precursor (Protocadherin-11) (Protocadherin on the X chromosome) (PCDH-X) (Protocadherin-S) [MASS=147557]                                                          | *    | 1.63  | *    | *    | * | 1 |  | 3 | TGDVPLIRIEEDTGEIFTTGAR                         | 1 |
| PC11Y_HUMAN (Q9BZA8) Protocadherin-11 Y-linked precursor (Protocadherin-11) (Protocadherin-22) (Protocadherin on the Y chromosome) (PCDH-Y) (Protocadherin prostate cancer) (Protocadherin-PC) [MASS=146774]      | *    | 1.57  | *    | *    | * | 1 |  | 3 | NMQNSEWATPNPENRQM[147]IM[147]M[147]K           | 1 |
| PCDA3_HUMAN (Q9Y5H8) Protocadherin alpha 3 precursor (PCDH-alpha3) [MASS=102428]                                                                                                                                  | 0.29 | 3.37  | 0.66 | 0.00 | 1 | 1 |  | 3 | C[339]SAPPTGDC[339]GPGKPTLVC[339]SSAVGSWSYSQQR | 1 |
| PCDA5_HUMAN (Q9Y5H7) Protocadherin alpha 5 precursor (PCDH-alpha5) [MASS=102047]                                                                                                                                  | *    | 1.50  | *    | *    | * | 1 |  | 3 | RAEC[330]SIHLEVIVDR                            | 1 |
| PCDGI_HUMAN (Q9Y5F9) Protocadherin gamma B6 precursor (PCDH-gamma-B6) [MASS=101043]                                                                                                                               | *    | 3.66  | *    | *    | * | 1 |  | 2 | ISLSENLPGPSVLQVTATDQDEGVNAEINYFR               | 1 |

|                                                                                                                                                                                                                                              |      |       |      |      |   |    |   |                                              |   |
|----------------------------------------------------------------------------------------------------------------------------------------------------------------------------------------------------------------------------------------------|------|-------|------|------|---|----|---|----------------------------------------------|---|
| PCDGL_HUMAN (Q9Y5F7) Protocadherin gamma C4 precursor (PCDH-gamma-C4) [MASS=101213]                                                                                                                                                          | *    | 5.44  | *    | *    | * | 2  | 3 | ARPGSLC[330]PQALPPSVGAGHLITK                 | 1 |
|                                                                                                                                                                                                                                              |      |       |      |      |   |    | 2 | FVDVGGHSHGC[330]TPLASAPTRSDFM[147]M[147]VK   | 1 |
| PCF11_HUMAN (O94913) Pre-mRNA cleavage complex 2 protein Pcf11 (Pre-mRNA cleavage complex II protein Pcf11) (Fragment) [MASS=183979]                                                                                                         | *    | 3.14  | *    | *    | * | 3  | 2 | IINGIVQKQDTITEESEKQGTK                       | 1 |
|                                                                                                                                                                                                                                              |      |       |      |      |   |    | 2 | DKDEHMKSSSEHR                                | 1 |
|                                                                                                                                                                                                                                              |      |       |      |      |   |    | 3 | RRFIPEVPPVSSPIPPPR                           | 1 |
|                                                                                                                                                                                                                                              |      |       |      |      |   |    | 3 | FGYRDDHYQYDRSGPYGYR                          | 1 |
|                                                                                                                                                                                                                                              |      |       |      |      |   |    | 2 | SHRTVVTM[147]DESTSSVM[147]TKIIEDEK           | 1 |
|                                                                                                                                                                                                                                              |      |       |      |      |   |    | 3 | IPPMVTTDQKQEESK                              | 1 |
| PCLO_HUMAN (Q9Y6V0) Protein piccolo (Aczonin) [MASS=566653]                                                                                                                                                                                  | *    | 4.21  | *    | *    | * | 10 | 3 | DASRPQTKQADIVR                               | 1 |
|                                                                                                                                                                                                                                              |      |       |      |      |   |    | 3 | LQINYDLGNLIHILQARNLVPR                       | 1 |
|                                                                                                                                                                                                                                              |      |       |      |      |   |    | 2 | MVKPTTDLVSSSSATTKPDIPSSK                     | 1 |
|                                                                                                                                                                                                                                              |      |       |      |      |   |    | 3 | EQLSTTYFTSGETFGQEKPASQLPSGSPSVSSLPAK         | 1 |
|                                                                                                                                                                                                                                              |      |       |      |      |   |    | 2 | DLSGIHTADAVTSLPAMHHSQPM[147]PR               | 1 |
|                                                                                                                                                                                                                                              |      |       |      |      |   |    | 3 | LDLNMLSDSENSQHLELHEPPKAVDKAK                 | 1 |
|                                                                                                                                                                                                                                              |      |       |      |      |   |    | 1 | AIPRPASDSK                                   | 2 |
| PCSK5_HUMAN (Q92824) Proprotein convertase subtilisin/kexin type 5 precursor (EC 3.4.21.-) (Proprotein convertase PC5) (Subtilisin/kexin-like protease PC5) (PC6) (hPC6) [MASS=101775]                                                       | *    | 3.29  | *    | *    | * | 2  | 1 | YDASNENK                                     | 1 |
|                                                                                                                                                                                                                                              |      |       |      |      |   |    | 2 | GTHSFISM[147]EPKVEWIIQQQVVKK                 | 1 |
| PCSK6_HUMAN (P29122) Proprotein convertase subtilisin/kexin type 6 precursor (EC 3.4.21.-) (Paired basic amino acid cleaving enzyme 4) (Subtilisin/kexin-like protease PACE4) (Subtilisin-like proprotein convertase 4) (SPC4) [MASS=106420] | 0.00 | 11.56 | 1.13 | 0.00 | 1 | 6  | 3 | C[339]DENC[330]LSC[330]AGSSRNC[339]SRC[339]K | 1 |
|                                                                                                                                                                                                                                              |      |       |      |      |   |    | 3 | C[339]VSVC[339]PLGYFGDTAARR                  | 1 |
|                                                                                                                                                                                                                                              |      |       |      |      |   |    | 3 | IGGIRM[147]LDGDVTDVVEAK                      | 1 |
|                                                                                                                                                                                                                                              |      |       |      |      |   |    | 2 | SRM[147]LELSAPELEPPK                         | 1 |
|                                                                                                                                                                                                                                              |      |       |      |      |   |    | 2 | IGGIRMLDGDVTDVVEAKSLGIR                      | 1 |
|                                                                                                                                                                                                                                              |      |       |      |      |   |    | 2 | C[330]VPAC[330]GEGFYPEEMPGLPHK               | 1 |
| PDE2A_HUMAN (O00408) cGMP-dependent 3',5'-cyclic phosphodiesterase (EC 3.1.4.17) (Cyclic GMP-stimulated phosphodiesterase) (CGS-PDE) (cGSPDE) [MASS=105716]                                                                                  | *    | 6.06  | *    | *    | * | 2  | 2 | LLHDGIQPVA/AIDSNFASFTYTPR                    | 1 |
|                                                                                                                                                                                                                                              |      |       |      |      |   |    | 3 | PDEPPPPQPC[339]ADSLQDALLSLGSDISGLQR          | 1 |
| PDE6C_HUMAN (P51160) Cone cGMP-specific 3',5'-cyclic phosphodiesterase alpha'-subunit (EC 3.1.4.35) (cGMP phosphodiesterase 6C) [MASS=99146]                                                                                                 | *    | 2.33  | *    | *    | * | 1  | 3 | KDIAQEMLM[147]NQTKATPEEIK                    | 1 |

|                                                                                                                                                                                                                                                  |      |       |      |      |   |   |   |   |                                        |   |
|--------------------------------------------------------------------------------------------------------------------------------------------------------------------------------------------------------------------------------------------------|------|-------|------|------|---|---|---|---|----------------------------------------|---|
| PDE8A_HUMAN (O60658) High-affinity cAMP-specific and IBMX-insensitive 3',5'-cyclic phosphodiesterase 8A (EC 3.1.4.17) [MASS=93303]                                                                                                               | *    | 8.44  | *    | *    | * | 3 | 3 | 3 | RLSGNEYVLSTKNTQM[147]VSSNIITPISLDDVPPR | 1 |
|                                                                                                                                                                                                                                                  |      |       |      |      |   |   | 3 | 3 | QGIIDMVLATEM[147]TK                    | 1 |
|                                                                                                                                                                                                                                                  |      |       |      |      |   |   | 3 | 3 | ELGEVPINEKKADLLDTINSC[330]IR           | 1 |
| PDIA6_HUMAN (Q15084) Protein disulfide-isomerase A6 precursor (EC 5.3.4.1) (Protein disulfide isomerase P5) (Thioredoxin domain-containing protein 7) [MASS=48121]                                                                               | 0.99 | 5.45  | 1.97 | 0.00 | 1 | 1 | 3 | 3 | TC[339]EEHQLC[339]VVAVLPHILDTGAAGR     | 1 |
| PDK2_HUMAN (Q15119) [Pyruvate dehydrogenase [lipoamide]] kinase isozyme 2, mitochondrial precursor (EC 2.7.11.2) (Pyruvate dehydrogenase kinase isoform 2) [MASS=46154]                                                                          | *    | 12.53 | *    | *    | * | 2 | 3 | 3 | HIGSIDPNC[339]NVSEVVKDAYDM[147]JAK     | 1 |
|                                                                                                                                                                                                                                                  |      |       |      |      |   |   | 3 | 3 | DTYGDDPVSNQNIQYFLDRFYLSRISIR           | 1 |
| PDZK6_HUMAN (Q9ULD6) PDZ domain-containing protein 6 [MASS=105647]                                                                                                                                                                               | 0.00 | 2.76  | *    | *    | * | 1 | 2 | 2 | SVSSLNPVKEHGVLFEC[339]SPGNWTDQK        | 1 |
| PEA15_HUMAN (Q15121) Astrocytic phosphoprotein PEA-15 (Phosphoprotein enriched in diabetes) (PED) [MASS=15040]                                                                                                                                   | 1.00 | 8.46  | 0.75 | 0.01 | 2 | 1 | 2 | 2 | SAC[330]KEDIPSEK                       | 1 |
|                                                                                                                                                                                                                                                  |      |       |      |      |   |   | 2 | 2 | SAC[339]KEDIPSEK                       | 1 |
| PELO_HUMAN (Q9BRX2) Protein pelota homolog [MASS=43377]                                                                                                                                                                                          | *    | 2.86  | *    | *    | * | 1 | 2 | 2 | FLQVHASSGHK                            | 1 |
| PEO1_HUMAN (Q96RR1) Twinkle protein, mitochondrial precursor (EC 3.6.1.-) (T7 gp4-like protein with intramitochondrial nucleoid localization) (T7-like mitochondrial DNA helicase) (Progressive external ophthalmoplegia 1 protein) [MASS=77154] | *    | 2.92  | *    | *    | * | 1 | 3 | 3 | KETLQALDMPVLPVTATEIR                   | 1 |
| PFTB_HUMAN (P49356) Protein farnesyltransferase subunit beta (EC 2.5.1.58) (CAAX farnesyltransferase subunit beta) (RAS proteins prenyltransferase beta) (FTase-beta) [MASS=48773]                                                               | 0.00 | 4.35  | 0.82 | 0.00 | 1 | 1 | 2 | 2 | LVDGC[339]YSFWQAGLLPLLHR               | 1 |
| PGAM1_HUMAN (P18669) Phosphoglycerate mutase 1 (EC 5.4.2.1) (EC 5.4.2.4) (EC 3.1.3.13) (Phosphoglycerate mutase isozyme B) (PGAM-B) (BPG-dependent PGAM 1) [MASS=28673]                                                                          | 1.00 | 13.44 | 0.66 | 0.02 | 4 | 2 | 3 | 3 | YADLTEDQLPSC[339]ESLKDTIAR             | 2 |
|                                                                                                                                                                                                                                                  |      |       |      |      |   |   | 2 | 2 | YADLTEDQLPSC[330]ESLKDTIAR             | 1 |
|                                                                                                                                                                                                                                                  |      |       |      |      |   |   | 2 | 2 | YADLTEDQLPSC[339]ESLKDTIAR             | 1 |
|                                                                                                                                                                                                                                                  |      |       |      |      |   |   | 3 | 3 | YADLTEDQLPSC[330]ESLKDTIAR             | 1 |
|                                                                                                                                                                                                                                                  |      |       |      |      |   |   | 3 | 3 | AETAAKHGAEQVK                          | 1 |

|                                                                                                                                                                                                                               |      |       |      |      |   |   |   |                                                |   |
|-------------------------------------------------------------------------------------------------------------------------------------------------------------------------------------------------------------------------------|------|-------|------|------|---|---|---|------------------------------------------------|---|
| PGCB_HUMAN (Q96GW7) Brevican core protein precursor (Brain-enriched hyaluronan-binding protein) (Protein BEHAB) [MASS=99117]                                                                                                  | 0.99 | 9.44  | 0.41 | 0.00 | 1 | 4 | 2 | VHGPPTETLPTPRERNLASPSTLVEAR                    | 1 |
|                                                                                                                                                                                                                               |      |       |      |      |   |   | 2 | IAGDAPLQGVLGALTIPC[339]HVHYLR                  | 1 |
|                                                                                                                                                                                                                               |      |       |      |      |   |   | 3 | VHGPPTETLPTPRER                                | 1 |
|                                                                                                                                                                                                                               |      |       |      |      |   |   | 2 | C[330]EVQHGIDDSSDAVEVK                         | 1 |
| PGDH_HUMAN (P15428) 15-hydroxyprostaglandin dehydrogenase [NAD+] (EC 1.1.1.141) (PGDH) (Prostaglandin dehydrogenase 1) [MASS=28977]                                                                                           | 0.00 | 11.65 | 2.24 | 0.00 | 1 | 1 | 2 | QNGGEGGIIINM[147]SSLAGLM[147]PVAQQPVYC[339]ASK | 1 |
| PGES2_HUMAN (Q9H7Z7) Prostaglandin E synthase 2 (EC 5.3.99.3) (Microsomal prostaglandin E synthase 2) (mPGES-2) [Contains: Prostaglandin E synthase 2 truncated form] [MASS=41943]                                            | 0.00 | 4.77  | *    | *    | * | 1 | 2 | AGFAGAAGGPPVAAARK                              | 3 |
| PGH2_HUMAN (P35354) Prostaglandin G/H synthase 2 precursor (EC 1.14.99.1) (Cyclooxygenase-2) (COX-2) (Prostaglandin-endoperoxide synthase 2) (Prostaglandin H2 synthase 2) (PGH synthase 2) (PGHS-2) (PHS II) [MASS=68996]    | 0.00 | 6.95  | 0.20 | 0.00 | 1 | 2 | 2 | EM[147]SAELEALYGDIDAVELYPALLVEK                | 1 |
|                                                                                                                                                                                                                               |      |       |      |      |   |   | 2 | GC[339]PFTSFSVPDELIK                           | 1 |
| PGK1_HUMAN (P00558) Phosphoglycerate kinase 1 (EC 2.7.2.3) (Primer recognition protein 2) (PRP 2) [MASS=44483]                                                                                                                | 1.00 | 9.38  | 0.57 | 0.01 | 2 | 2 | 2 | AC[339]ANPAAGSVILLENLR                         | 1 |
|                                                                                                                                                                                                                               |      |       |      |      |   |   | 2 | AC[330]ANPAAGSVILLENLR                         | 1 |
|                                                                                                                                                                                                                               |      |       |      |      |   |   | 2 | NGVKITLPVDFVTADKFDENAK                         | 1 |
| PHAR1_HUMAN (Q9C0D0) Phosphatase and actin regulator 1 [MASS=66308]                                                                                                                                                           | 0.00 | 10.86 | 1.02 | 0.00 | 1 | 3 | 2 | VM[147]IC[330]M[147]PVGGPDLVSLVSYTAQK          | 1 |
|                                                                                                                                                                                                                               |      |       |      |      |   |   | 2 | ATLLLPPTLM[147]AASSEDDIDRR                     | 1 |
|                                                                                                                                                                                                                               |      |       |      |      |   |   | 2 | ELNEFKSTEM[147]EVHELRSRLTR                     | 1 |
| PHEX_HUMAN (P78562) Phosphate-regulating neutral endopeptidase (EC 3.4.24.-) (Metalloendopeptidase homolog PEX) (X-linked hypophosphatemia protein) (HYP) (Vitamin D-resistant hypophosphatemic rickets protein) [MASS=86473] | *    | 4.41  | *    | *    | * | 1 | 3 | WINDRRQGLEEPLLPGITFTNNQLFFLSYAHVR              | 1 |
| PHLB1_HUMAN (Q86UU1) Pleckstrin homology-like domain family B member 1 (Protein LL5-alpha) [MASS=151161]                                                                                                                      | *    | 5.81  | *    | *    | * | 3 | 3 | LTQGC[339]MLC[330]LGQSTFLRFNHPAEAKWM[147]K     | 1 |
|                                                                                                                                                                                                                               |      |       |      |      |   |   | 2 | NQIGPGC[330]QTQTM[147]VQK                      | 1 |
|                                                                                                                                                                                                                               |      |       |      |      |   |   | 3 | LLLPAVDLEQWYQELMAGLGTGPAASPHSSPPPLPAK          | 1 |



|                                                                                                                                                                                                                                                        |      |       |      |      |   |   |   |                                      |   |
|--------------------------------------------------------------------------------------------------------------------------------------------------------------------------------------------------------------------------------------------------------|------|-------|------|------|---|---|---|--------------------------------------|---|
| PHYIP_HUMAN (Q92561) Phytanoyl-CoA hydroxylase-interacting protein (Phytanoyl-CoA hydroxylase-associated protein 1) (PAHXAP1) (PAHX-AP1) [MASS=37572]                                                                                                  | 0.85 | 3.64  | 1.15 | 0.00 | 1 | 1 | 2 | THC[339]GNM[147]LQPYLK               | 1 |
| PIAS3_HUMAN (Q9Y6X2) Protein inhibitor of activated STAT protein 3 [MASS=68017]                                                                                                                                                                        | 0.54 | 7.64  | 0.18 | 0.00 | 1 | 3 | 2 | C[330]DYTIQVQLR                      | 1 |
|                                                                                                                                                                                                                                                        |      |       |      |      |   |   | 2 | ALTC[339]AHLQSFDAALYLQM[147]NEKK     | 1 |
|                                                                                                                                                                                                                                                        |      |       |      |      |   |   | 3 | ALHLLKSSC[330]APSVQM[147]K           | 1 |
| PIGO_HUMAN (Q8TEQ8) Phosphatidylinositol-glycan biosynthesis, class O protein (PIG-O) [MASS=118698]                                                                                                                                                    | 0.00 | 1.29  | 0.60 | 0.00 | 1 | 1 | 2 | AMC[330]IESWARFSLVR                  | 1 |
| PK3CA_HUMAN (P42336) Phosphatidylinositol-4,5-bisphosphate 3-kinase catalytic subunit alpha isoform (EC 2.7.1.153) (PI3-kinase p110 subunit alpha) (PtdIns-3-kinase p110) (PI3K) [MASS=124412]                                                         | 0.00 | 4.68  | 1.14 | 0.00 | 1 | 3 | 2 | SC[339]IMLGRMPNLKM[147]MAK           | 1 |
|                                                                                                                                                                                                                                                        |      |       |      |      |   |   | 2 | EIGFAIGM[147]PVC[330]EFDM[147]VK     | 1 |
|                                                                                                                                                                                                                                                        |      |       |      |      |   |   | 2 | SC[339]AGYC[330]VATFILGIGDR          | 1 |
| PK3CG_HUMAN (P48736) Phosphatidylinositol-4,5-bisphosphate 3-kinase catalytic subunit gamma isoform (EC 2.7.1.153) (PI3-kinase p110 subunit gamma) (PtdIns-3-kinase subunit p110) (PI3K) (PI3Kgamma) (p120-PI3K) [MASS=126453]                         | 0.00 | 7.53  | 0.44 | 0.00 | 1 | 4 | 3 | STTSQTIKVSPDDTPGAILQSFFTKMAK         | 1 |
|                                                                                                                                                                                                                                                        |      |       |      |      |   |   | 3 | SAAASLSSMELIPIEFVLPTSQRK             | 1 |
|                                                                                                                                                                                                                                                        |      |       |      |      |   |   | 2 | KIANNC[330]IFIVIHR                   | 1 |
|                                                                                                                                                                                                                                                        |      |       |      |      |   |   | 2 | M[147]ELENYKQPVVLRDNC[339]R          | 1 |
| PKHA5_HUMAN (Q9HAU0) Pleckstrin homology domain-containing family A member 5 (Phosphoinositol 3-phosphate-binding protein 2) (PEPP-2) [MASS=127463]                                                                                                    | 0.42 | 7.17  | 1.09 | 0.00 | 1 | 4 | 3 | KERPISMINEASNYNVTSYAVHPM[147]SPVGR   | 1 |
|                                                                                                                                                                                                                                                        |      |       |      |      |   |   | 2 | TYYFC[330]TDTGKEM[147]ELWM[147]K     | 1 |
|                                                                                                                                                                                                                                                        |      |       |      |      |   |   | 2 | HQQAC[339]LR                         | 1 |
|                                                                                                                                                                                                                                                        |      |       |      |      |   |   | 3 | KTENISYEMLFEPENGVNSVEM[147]MDK       | 2 |
| PLCC_HUMAN (Q9NRZ7) 1-acyl-sn-glycerol-3-phosphate acyltransferase gamma (EC 2.3.1.51) (1-AGP acyltransferase 3) (1-AGPAT 3) (Lysophosphatidic acid acyltransferase-gamma) (LPAAT-gamma) (1-acylglycerol-3-phosphate O-acyltransferase 3) [MASS=43381] | *    | 12.50 | *    | *    | * | 2 | 3 | FGKEHAVIILNHNFEIDFLC[339]GWTC[330]ER | 1 |
|                                                                                                                                                                                                                                                        |      |       |      |      |   |   | 3 | C[330]LRGTVAAYDVTLNFRGNK             | 1 |

|                                                                                                                                                                                                        |      |       |      |      |   |   |   |                                         |   |
|--------------------------------------------------------------------------------------------------------------------------------------------------------------------------------------------------------|------|-------|------|------|---|---|---|-----------------------------------------|---|
| PLCD1_HUMAN (P51178) 1-phosphatidylinositol-4,5-bisphosphate phosphodiesterase delta 1 (EC 3.1.4.11) (Phosphoinositide phospholipase C) (PLC-delta-1) (Phospholipase C-delta-1) (PLC-III) [MASS=85763] | *    | 7.94  | *    | *    | * | 3 |   |                                         |   |
|                                                                                                                                                                                                        |      |       |      |      |   |   | 3 | QMTKDGFLMYLLSADGSAFSLAHR                | 1 |
|                                                                                                                                                                                                        |      |       |      |      |   |   | 3 | DQRNTLDLIAPSPADAQHWVLGLHK               | 1 |
|                                                                                                                                                                                                        |      |       |      |      |   |   | 2 | RLVAC[339]GSIWQGIC[339]QFLR             | 1 |
|                                                                                                                                                                                                        |      |       |      |      |   |   | 1 | C[339]SHPR                              | 1 |
| PLXA3_HUMAN (P51805) Plexin-A3 precursor (Plexin-4) (Semaphorin receptor SEX) [MASS=207664]                                                                                                            | 0.00 | 5.56  | 0.89 | 0.00 | 1 | 6 | 3 | ALTLPAM[147]M[147]GLAAGGGLLLLITAVLVAYKR | 1 |
|                                                                                                                                                                                                        |      |       |      |      |   |   | 1 | GVEYR                                   | 1 |
|                                                                                                                                                                                                        |      |       |      |      |   |   | 3 | YRGIETTNTC[330]QVINDTAMLC[339]KAPGIFLGR | 1 |
|                                                                                                                                                                                                        |      |       |      |      |   |   | 2 | MASISDQDM[147]DAYLVEQSR                 | 1 |
| PP1A_HUMAN (P62136) Serine/threonine-protein phosphatase PP1-alpha catalytic subunit (EC 3.1.3.16) (PP-1A) [MASS=37512]                                                                                | 0.60 | 10.00 | 0.75 | 0.00 | 1 | 2 | 3 | IFC[339]C[339]HGGLSPDLQSM[147]EQIRRIMR  | 1 |
|                                                                                                                                                                                                        |      |       |      |      |   |   | 2 | GNHEC[330]ASINR                         | 1 |
| PP4C_HUMAN (P60510) Serine/threonine-protein phosphatase 4 catalytic subunit (EC 3.1.3.16) (PP4C) (Pp4) (Protein phosphatase X) (PP-X) [MASS=35080]                                                    | *    | 4.89  | *    | *    | * | 1 | 3 | C[339]ELIKESEVKALC[330]AK               | 1 |
| PPARG_HUMAN (P37231) Peroxisome proliferator-activated receptor gamma (PPAR-gamma) [MASS=57620]                                                                                                        | 0.00 | 2.38  | 0.13 | 0.00 | 1 | 1 | 2 | C[330]LAVGM[147]SHNAIR                  | 1 |

|                                                                                                                                                                                                                                                                       |      |       |      |      |   |   |                       |                                                                                                                          |                       |
|-----------------------------------------------------------------------------------------------------------------------------------------------------------------------------------------------------------------------------------------------------------------------|------|-------|------|------|---|---|-----------------------|--------------------------------------------------------------------------------------------------------------------------|-----------------------|
| PPE1_HUMAN (O14829) Serine/threonine-protein phosphatase with EF-hands 1 (EC 3.1.3.16) (PPEF-1) (Protein phosphatase with EF calcium-binding domain) (PPEF) (Serine/threonine-protein phosphatase 7) (PP7) [MASS=75792]                                               | 0.00 | 1.23  | 0.04 | 0.00 | 1 | 1 | 2                     | LC[330]SGTTPR                                                                                                            | 1                     |
| PPGB_HUMAN (P10619) Lysosomal protective protein precursor (EC 3.4.16.5) (Cathepsin A) (Carboxypeptidase C) (Protective protein for beta-galactosidase) [Contains: Lysosomal protective protein 32 kDa chain; Lysosomal protective protein 20 kDa chain] [MASS=54466] | 0.00 | 4.38  | 1.04 | 0.00 | 1 | 1 | 3                     | M[147]DPCC[339]TNNTAASTYLNPNPYVR                                                                                         | 1                     |
| PPIA_HUMAN (P62937) Peptidyl-prolyl cis-trans isomerase A (EC 5.2.1.8) (PPlase A) (Rotamase A) (Cyclophilin A) (Cyclosporin A-binding protein) [MASS=17881]                                                                                                           | 1.00 | 15.24 | 0.72 | 0.14 | 4 | 2 | 1<br>2<br>2<br>2      | KITIADC[330]GQLE<br>IIPGFM[147]C[330]QGGDFTR<br>IIPGFMC[330]QGGDFTR<br>KITIADC[330]GQLE                                  | 1<br>1<br>1<br>1      |
| PPIB_HUMAN (P23284) Peptidyl-prolyl cis-trans isomerase B precursor (EC 5.2.1.8) (PPlase) (Rotamase) (Cyclophilin B) (S-cyclophilin) (SCYLP) (CYP-S1) [MASS=22742]                                                                                                    | 0.97 | 36.54 | 0.88 | 0.00 | 1 | 4 | 2<br>2<br>3<br>2      | TVDNFVALATGEKGFYK<br>DKPLKDVIIADC[330]GK<br>DFMIQGGDFTRGDGTGGK<br>VLLAAALIAGSVFLLLPGPSAADEK                              | 1<br>1<br>1<br>1      |
| PPOX_HUMAN (P50336) Protoporphyrinogen oxidase (EC 1.3.3.4) (PPO) [MASS=50765]                                                                                                                                                                                        | *    | 5.87  | *    | *    | * | 1 | 3                     | VTVMLGGSWLQTLEASGC[330]VLSQELFQQR                                                                                        | 1                     |
| PPP5_HUMAN (P53041) Serine/threonine-protein phosphatase 5 (EC 3.1.3.16) (PP5) (Protein phosphatase T) (PP-T) (PPT) [MASS=56878]                                                                                                                                      | 0.00 | 5.61  | 3.62 | 0.00 | 1 | 2 | 2<br>2                | TEC[339]YGYALGDATRAIELDKK<br>TEC[339]AEPFR                                                                               | 1<br>1                |
| PR285_HUMAN (Q9BYK8) Peroxisomal proliferator-activated receptor A-interacting complex 285 kDa protein (EC 3.6.1.-) (ATP-dependent helicase PRIC285) (PPAR-alpha-interacting complex protein 285) (PPAR-gamma DBD-interacting protein 1) (PDIP1) [MASS=294533]        | *    | 3.17  | *    | *    | * | 5 | 2<br>2<br>3<br>3<br>3 | DPSQVPIYSLRKGR<br>LRSDC[330]FYEQPDEDTLGFRR<br>TQDYEQMVDLVTTDDM[147]HPFLAPAGR<br>WPEAAALIQEKGEASQR<br>VC[330]RRPTM[147]PS | 1<br>1<br>1<br>1<br>1 |
| PRD11_HUMAN (Q9NQV5) PR domain-containing protein 11 [MASS=57033]                                                                                                                                                                                                     | 0.48 | 8.13  | 2.30 | 0.00 | 1 | 2 | 2<br>3                | ADSPAEASLASDPHELPTTSFC[339]PNC[339]IR<br>MAEPIASLMIVFC[330]R                                                             | 1<br>1                |

|                                                                                                                                                                     |      |       |      |      |   |   |   |                                                  |   |
|---------------------------------------------------------------------------------------------------------------------------------------------------------------------|------|-------|------|------|---|---|---|--------------------------------------------------|---|
| PRDM7_HUMAN (Q9NQW5) PR domain zinc finger protein 7 (PR domain-containing protein 7) [MASS=45965]                                                                  | 0.00 | 8.60  | 2.48 | 0.00 | 1 | 2 | 3 | LLQPENPC[339]PGDQNQER                            | 1 |
|                                                                                                                                                                     |      |       |      |      |   |   | 2 | SDVITHQRTHTGGKPYVC[339]R                         | 1 |
| PRDM8_HUMAN (Q9NQV8) PR domain zinc finger protein 8 (PR domain-containing protein 8) [MASS=71709]                                                                  | *    | 6.53  | *    | *    | * | 2 | 3 | DKEEQNLEAYIKNGQLFYR                              | 1 |
|                                                                                                                                                                     |      |       |      |      |   |   | 3 | DEELLVWYGKELTELLLLC[330]PSRSHNK                  | 1 |
| PREX1_HUMAN (Q8TCU6) Phosphatidylinositol 3,4,5-trisphosphate-dependent Rac exchanger 1 protein (P-Rex1 protein) [MASS=186203]                                      | *    | 2.59  | *    | *    | * | 3 | 2 | APGAAAPSSGPGPC[330]AAARESER                      | 1 |
|                                                                                                                                                                     |      |       |      |      |   |   | 2 | LYHM[147]M[147]M[147]NKK                         | 1 |
|                                                                                                                                                                     |      |       |      |      |   |   | 2 | LPSRLEGGASLR                                     | 1 |
| PRI2_HUMAN (P49643) DNA primase large subunit (EC 2.7.7.-) (DNA primase 58 kDa subunit) (p58) [MASS=58806]                                                          | *    | 6.68  | *    | *    | * | 2 | 3 | GIGLTLEQALQFWKQEFIK                              | 1 |
|                                                                                                                                                                     |      |       |      |      |   |   | 3 | DIKKEPIQPETPQPK                                  | 1 |
| PRI0_HUMAN (P04156) Major prion protein precursor (PrP) (PrP27-30) (PrP33-35C) (ASCR) (CD230 antigen) [MASS=27661]                                                  | 0.66 | 15.02 | 0.48 | 0.00 | 1 | 2 | 2 | HMAGAAAAGAVVGGGLGGYM[147]LGSAM[147]SR            | 1 |
|                                                                                                                                                                     |      |       |      |      |   |   | 2 | VVEQMC[330]ITQYER                                | 1 |
| PROD_HUMAN (O43272) Proline oxidase, mitochondrial precursor (EC 1.5.3.-) (Proline dehydrogenase) [MASS=59216]                                                      | 0.00 | 11.82 | 0.49 | 0.00 | 1 | 3 | 2 | EMESC[330]SSAAERDGSSTNKR                         | 1 |
|                                                                                                                                                                     |      |       |      |      |   |   | 2 | ALENSSLMK                                        | 1 |
|                                                                                                                                                                     |      |       |      |      |   |   | 2 | C[330]FFHQM[147]AVEQQQAGLAAM[147]DTKLEVAVLQESVAK | 1 |
| PRP16_HUMAN (Q92620) Pre-mRNA-splicing factor ATP-dependent RNA helicase PRP16 (EC 3.6.1.-) (ATP-dependent RNA helicase DHX38) (DEAH box protein 38) [MASS=140502]  | 0.00 | 1.30  | 1.74 | 0.00 | 1 | 1 | 3 | LEGTDLDC[339]QVGGGLIC[339]K                      | 1 |
| PRPS1_HUMAN (P60891) Ribose-phosphate pyrophosphokinase I (EC 2.7.6.1) (Phosphoribosyl pyrophosphate synthetase I) (PRS-I) (PPRibP) [MASS=34703]                    | *    | 3.15  | *    | *    | * | 1 | 2 | M[147]VLVGDVKDR                                  | 1 |
| PRR11_HUMAN (Q96HE9) Proline-rich protein 11 [MASS=40085]                                                                                                           | *    | 5.00  | *    | *    | * | 1 | 3 | ENMETGTGLTPVM[147]TQALR                          | 1 |
| PSD13_HUMAN (Q9UNM6) 26S proteasome non-ATPase regulatory subunit 13 (26S proteasome regulatory subunit S11) (26S proteasome regulatory subunit p40.5) [MASS=42918] | *    | 8.24  | *    | *    | * | 2 | 2 | RVHM[147]TWVQPRVLDLQQIK                          | 1 |
|                                                                                                                                                                     |      |       |      |      |   |   | 3 | VLDLQQIKGMKDR                                    | 1 |

|                                                                                                                                                                                                         |      |       |      |      |   |   |                  |                                                                                                                                     |                  |
|---------------------------------------------------------------------------------------------------------------------------------------------------------------------------------------------------------|------|-------|------|------|---|---|------------------|-------------------------------------------------------------------------------------------------------------------------------------|------------------|
| PSD1_HUMAN (Q99460) 26S proteasome non-ATPase regulatory subunit 1 (26S proteasome regulatory subunit RPN2) (26S proteasome regulatory subunit S1) (26S proteasome subunit p112) [MASS=105836]          | *    | 5.46  | *    | *    | * | 2 | 3<br>2           | DAVRNSVC[330]HTATVIANSFM[147]HC[330]GTTSDQFLR<br>KEPEPNFQLLDNPARVM[147]PAQLK                                                        | 1<br>1           |
| PSL1_HUMAN (Q8TCT7) Signal peptide peptidase-like 2B (EC 3.4.23.-) (Protein SPP-like 2B) (Protein SPPL2b) (Intramembrane protease 4) (IMP4) (Presenilin-like protein 1) [MASS=64643]                    | *    | 4.73  | *    | *    | * | 2 | 3<br>2           | GLLIVSRERLVPPGGNK<br>EPGSPAESEGR                                                                                                    | 1<br>1           |
| PTN18_HUMAN (Q99952) Tyrosine-protein phosphatase non-receptor type 18 (EC 3.1.3.48) (Brain-derived phosphatase) [MASS=50384]                                                                           | *    | 9.17  | *    | *    | * | 2 | 3<br>2           | LEARGGREGAVLAGEFSDIQAC[330]SAAWK<br>LVWEFGVKVILM[147]AC[330]R                                                                       | 1<br>1           |
| PTN7_HUMAN (P35236) Tyrosine-protein phosphatase non-receptor type 7 (EC 3.1.3.48) (Protein-tyrosine phosphatase LC-PTP) (Hematopoietic protein-tyrosine phosphatase) (HEPTP) [MASS=40529]              | 0.00 | 25.00 | 0.28 | 0.00 | 1 | 4 | 2<br>3<br>3<br>2 | RGSNVALMLDVRSLGAVEPIC[339]SVNTPR<br>HILFSAWPDHQTPESAGPLLR<br>MVQAHGGRSRAQPLTSLGAAM[147]TQPPPEK<br>IQDM[147]KEC[330]PEYTVR           | 1<br>1<br>1<br>1 |
| PTPRS_HUMAN (Q13332) Receptor-type tyrosine-protein phosphatase S precursor (EC 3.1.3.48) (R-PTP-S) (Protein-tyrosine phosphatase sigma) (R-PTP-sigma) [MASS=217093]                                    | *    | 1.95  | *    | *    | * | 2 | 3<br>2           | SETFESTPIRGALQIESSEETDQGK<br>SATIVM[147]MTRLEEK                                                                                     | 1<br>1           |
| PTPRU_HUMAN (Q92729) Receptor-type tyrosine-protein phosphatase U precursor (EC 3.1.3.48) (R-PTP-U) (Protein-tyrosine phosphatase J) (PTP-J) (Pancreatic carcinoma phosphatase 2) (PCP-2) [MASS=160227] | *    | 3.43  | *    | *    | * | 2 | 3<br>3           | QSGALVPAGAFGTSATGFLATFPLAAVSRAEQDLYR<br>QEPM[147]PAYDRHRVK                                                                          | 1<br>1           |
| PURA_HUMAN (Q00577) Transcriptional activator protein Pur-alpha (Purine-rich single-stranded DNA-binding protein alpha) [MASS=34911]                                                                    | 1.00 | 4.35  | 1.16 | 0.01 | 2 | 2 | 2<br>2<br>2      | FGHTFC[339]JK<br>YSEEMKK<br>FGHTFC[330]JK                                                                                           | 1<br>1<br>1      |
| PUS3_HUMAN (Q9BZE2) tRNA pseudouridine synthase 3 (EC 5.4.99.-) (tRNA-uridine isomerase 3) (tRNA pseudouridylate synthase 3) [MASS=55615]                                                               | 0.00 | 18.09 | 0.61 | 0.00 | 1 | 4 | 2<br>3<br>2<br>2 | PSVIKQTSFAFVEGVKMR<br>THM[147]LYSM[147]LQGLDTPVPVPC[330]GIGPKM[147]DGMTEWGNVK<br>M[147]ADNDTDRNQTEKLLK<br>ILAWAPVEPSFSARFSC[330]LER | 1<br>1<br>1<br>1 |

|                                                                                                                                                                                                   |      |       |      |      |   |   |   |                                         |   |
|---------------------------------------------------------------------------------------------------------------------------------------------------------------------------------------------------|------|-------|------|------|---|---|---|-----------------------------------------|---|
| PX11C_HUMAN (Q96HA9) Peroxisomal membrane protein 11C (Peroxin-11C) (Peroxisomal biogenesis factor 11C) (PEX11gamma) (Pex11pgamma) [MASS=26636]                                                   | *    | 4.98  | *    | *    | * | 1 | 3 | LLVSTQLSHC[339]R                        | 2 |
| PYR1_HUMAN (P27708) CAD protein [Includes: Glutamine-dependent carbamoyl-phosphate synthase (EC 6.3.5.5); Aspartate carbamoyltransferase (EC 2.1.3.2); Dihydroorotase (EC 3.5.2.3)] [MASS=242982] | 0.00 | 2.65  | 1.61 | 0.00 | 1 | 3 | 2 | C[339]GSRPPPGFPGLETM[147]LPLLLTAVSEGR   | 1 |
|                                                                                                                                                                                                   |      |       |      |      |   |   | 2 | IDRWFLHR                                | 1 |
|                                                                                                                                                                                                   |      |       |      |      |   |   | 2 | IGSC[339]M[147]KSVGEVM[147]GIGRSFEEAFQK | 1 |
| QOR_HUMAN (Q08257) Quinone oxidoreductase (EC 1.6.5.5) (NADPH:quinone reductase) (Zeta-crystallin) [MASS=35206]                                                                                   | 0.92 | 2.74  | 1.03 | 0.00 | 1 | 1 | 2 | ALIHSAC[339]VK                          | 1 |
| R113A_HUMAN (O15541) RING finger protein 113A (Zinc finger protein 183) [MASS=38787]                                                                                                              | 0.00 | 5.83  | 4.55 | 0.00 | 1 | 1 | 3 | TTPRC[339]YVC[339]DQQTNGVFNPAK          | 1 |
| R51A1_HUMAN (Q96B01) RAD51-associated protein 1 (RAD51-interacting protein) [MASS=38457]                                                                                                          | *    | 5.68  | *    | *    | * | 2 | 3 | ITVEDDVGGVQGK                           | 1 |
|                                                                                                                                                                                                   |      |       |      |      |   |   | 1 | VKSPVEK                                 | 1 |
| RAB1A_HUMAN (P62820) Ras-related protein Rab-1A (YPT1-related protein) [MASS=22546]                                                                                                               | 0.30 | 2.94  | 0.75 | 0.00 | 1 | 1 | 2 | C[330]DLTTK                             | 1 |
| RAC1_HUMAN (P63000) Ras-related C3 botulinum toxin substrate 1 precursor (p21-Rac1) (Ras-like protein TC25) [MASS=21450]                                                                          | 1.00 | 12.50 | 0.69 | 0.10 | 3 | 2 | 2 | YLEC[339]SALTQR                         | 1 |
|                                                                                                                                                                                                   |      |       |      |      |   |   | 2 | HHC[330]PNTPIILVGTK                     | 1 |
|                                                                                                                                                                                                   |      |       |      |      |   |   | 2 | HHC[339]PNTPIILVGTK                     | 1 |
| RAF1_HUMAN (P04049) RAF proto-oncogene serine/threonine-protein kinase (EC 2.7.11.1) (Raf-1) (C-RAF) (cRaf) [MASS=73051]                                                                          | *    | 4.32  | *    | *    | * | 2 | 3 | GQRDSSYYWEIEASEVMLSTR                   | 1 |
|                                                                                                                                                                                                   |      |       |      |      |   |   | 2 | MRESVSR                                 | 1 |
| RAG1_HUMAN (P15918) V(D)J recombination-activating protein 1 (RAG-1) (RING finger protein 74) [MASS=119115]                                                                                       | *    | 4.03  | *    | *    | * | 3 | 3 | PSLEQSPAVLDK                            | 1 |
|                                                                                                                                                                                                   |      |       |      |      |   |   | 3 | EEGGDVKSVC[339]M[147]TLFLLALR           | 1 |
|                                                                                                                                                                                                   |      |       |      |      |   |   | 2 | RYPVHGPVDGK                             | 2 |
| RAI14_HUMAN (Q9P0K7) Ankycorbin (Ankyrin repeat and coiled-coil structure-containing protein) (Retinoic acid-induced protein 14) (Novel retinal pigment epithelial cell protein) [MASS=110041]    | 0.53 | 3.78  | 2.36 | 0.00 | 1 | 2 | 3 | TALMLAC[330]EIGSSNAVEALIK               | 1 |
|                                                                                                                                                                                                   |      |       |      |      |   |   | 2 | ISNLKEHLASKEVEVAK                       | 1 |

|                                                                                                                                                                                                             |      |      |      |      |   |   |   |                                                      |   |
|-------------------------------------------------------------------------------------------------------------------------------------------------------------------------------------------------------------|------|------|------|------|---|---|---|------------------------------------------------------|---|
| RAI1_HUMAN (Q7Z5J4) Retinoic acid-induced protein 1 [MASS=203351]                                                                                                                                           | *    | 2.83 | *    | *    | * | 3 | 3 | GC[339]LHTYHYPC[339]ASDAGC[339]IFIEENFSLK            | 1 |
|                                                                                                                                                                                                             |      |      |      |      |   |   | 2 | HC[339]C[330]STADFGDLPLLPPTSR                        | 1 |
|                                                                                                                                                                                                             |      |      |      |      |   |   | 2 | TSARGLSRR                                            | 1 |
| RANB9_HUMAN (Q96S59) Ran-binding protein 9 (RanBP9) (RanBP7) (Ran-binding protein M) (RanBPM) (BPM90) (BPM-L) [MASS=77847]                                                                                  | 0.00 | 1.78 | 1.82 | 0.00 | 1 | 1 | 3 | RQLC[339]GGSQAAIER                                   | 1 |
| RASF7_HUMAN (Q02833) Ras association domain-containing protein 7 (HRAS1-related cluster protein 1) [MASS=39945]                                                                                             | *    | 9.92 | *    | *    | * | 2 | 2 | M[147]LLGLAAMELKVVVDGIQR                             | 1 |
|                                                                                                                                                                                                             |      |      |      |      |   |   | 3 | EESLLGAPSESHAGAQPR                                   | 1 |
| RASH_HUMAN (P01112) GTPase HRas precursor (Transforming protein p21) (p21ras) (H-Ras-1) (c-H-ras) [MASS=21298]                                                                                              | 0.99 | 7.94 | 1.01 | 0.00 | 1 | 1 | 2 | TGEGFLC[330]VFAINNTK                                 | 1 |
| RBCC1_HUMAN (Q8TDY2) RB1-inducible coiled-coil protein 1 [MASS=183060]                                                                                                                                      | *    | 2.26 | *    | *    | * | 3 | 3 | WC[339]C[339]FVM[147]LHADQDGEKQLQALLR                | 1 |
|                                                                                                                                                                                                             |      |      |      |      |   |   | 2 | LVSSQEQR                                             | 1 |
|                                                                                                                                                                                                             |      |      |      |      |   |   | 1 | VPLGTK                                               | 1 |
| RBL1_HUMAN (P28749) Retinoblastoma-like protein 1 (107 kDa retinoblastoma-associated protein) (PRB1) (P107) [MASS=120846]                                                                                   | *    | 4.31 | *    | *    | * | 2 | 2 | VKSFALKYDLANQDHMM[147]DAPPLSPFPHIK                   | 1 |
|                                                                                                                                                                                                             |      |      |      |      |   |   | 2 | IWTC[339]FEFTLVHC[339]PDLMK                          | 1 |
| RBL2_HUMAN (Q08999) Retinoblastoma-like protein 2 (130 kDa retinoblastoma-associated protein) (PRB2) (P130) (RBR-2) [MASS=128356]                                                                           | 0.00 | 5.62 | 1.22 | 0.00 | 1 | 4 | 2 | LGDMDLSGILEQDAFHR                                    | 1 |
|                                                                                                                                                                                                             |      |      |      |      |   |   | 2 | KIWTC[339]FEFSIIQC[339]PELMMDR                       | 1 |
|                                                                                                                                                                                                             |      |      |      |      |   |   | 3 | C[339]LNAGSGTETAER                                   | 1 |
|                                                                                                                                                                                                             |      |      |      |      |   |   | 3 | C[339]SEQSLIEFFNKMK                                  | 1 |
| REC8L_HUMAN (O95072) Meiotic recombination protein REC8-like 1 (Cohesin Rec8p) [MASS=62613]                                                                                                                 | *    | 2.74 | *    | *    | * | 1 | 2 | MLEIEGERELPEVSR                                      | 1 |
| RED2_HUMAN (Q9NS39) Double-stranded RNA-specific editase B2 (EC 3.5.-.-) (dsRNA adenosine deaminase B2) (RNA-dependent adenosine deaminase 3) (RNA-editing deaminase 2) (RNA-editing enzyme 2) [MASS=80621] | *    | 2.03 | *    | *    | * | 1 | 3 | TPSPGDTPSMYC[339]EAK                                 | 1 |
| RELN_HUMAN (P78509) Reelin precursor (EC 3.4.21.-) [MASS=388399]                                                                                                                                            | 0.00 | 4.77 | 2.54 | 0.00 | 1 | 7 | 3 | C[330]GILSSGNNLFFNEDGLRM[147]LMTR                    | 1 |
|                                                                                                                                                                                                             |      |      |      |      |   |   | 3 | YVETQSM[147]QIGASYM[147]IQFSLVM[147]GC[339]GQK       | 1 |
|                                                                                                                                                                                                             |      |      |      |      |   |   | 2 | LASSM[147]RYVETQSMQIGASYM[147]IQFSLVM[147]GC[330]GQK | 1 |
|                                                                                                                                                                                                             |      |      |      |      |   |   | 3 | SGWARQTFLALLLGATLRAR                                 | 1 |
|                                                                                                                                                                                                             |      |      |      |      |   |   | 2 | PRYAETWDFHVSASTFLQFEM[147]SM[147]GC[339]SK           | 1 |
|                                                                                                                                                                                                             |      |      |      |      |   |   | 2 | QAVTQDLDLRGAK                                        | 1 |
|                                                                                                                                                                                                             |      |      |      |      |   |   | 3 | YISVRHDYILLPEDALTNTRLR                               | 1 |

|                                                                                                                                                                                                                                                            |      |       |      |      |   |   |   |                                          |   |
|------------------------------------------------------------------------------------------------------------------------------------------------------------------------------------------------------------------------------------------------------------|------|-------|------|------|---|---|---|------------------------------------------|---|
| REM1_HUMAN (O75628) GTP-binding protein REM 1 (Rad and Gem-like GTP-binding protein 1) (GTPase-regulating endothelial cell sprouting) [MASS=32947]                                                                                                         | *    | 10.07 | *    | *    | * | 1 | 2 | AC[339]AVVFDC[330]KFIETSATLQHNVAELFEGVVR | 1 |
| RFC5_HUMAN (P40937) Replication factor C subunit 5 (Replication factor C 36 kDa subunit) (RF-C 36 kDa subunit) (RFC36) (Activator 1 36 kDa subunit) (A1 36 kDa subunit) [MASS=38496]                                                                       | 0.00 | 11.76 | *    | *    | * | 2 | 2 | LVILDEADAM[147]TQDAQNALR                 | 1 |
|                                                                                                                                                                                                                                                            |      |       |      |      |   |   | 3 | VDISEDGMKALVTLSSGDMRR                    | 1 |
| RFWD2_HUMAN (Q8NH2) Ring finger and WD repeat domain protein 2 (EC 6.3.2.-) (Ubiquitin-protein ligase COP1) (Constitutive photomorphogenesis protein 1 homolog) (hCOP1) [MASS=80474]                                                                       | 0.00 | 9.44  | 0.28 | 0.00 | 1 | 3 | 3 | RC[330]WSVDFNLMKLLASGSDDAK               | 1 |
|                                                                                                                                                                                                                                                            |      |       |      |      |   |   | 3 | RPLLAPLC[339]NGLINSYEDK                  | 1 |
|                                                                                                                                                                                                                                                            |      |       |      |      |   |   | 2 | IKVYEYDVTIQDAVDIHYPENEMTC[330]NSK        | 1 |
| RGN_HUMAN (Q15493) Regucalcin (RC) (Senescence marker protein 30) (SMP-30) [MASS=33253]                                                                                                                                                                    | 0.00 | 13.38 | 0.23 | 0.00 | 1 | 2 | 2 | LEKEEQIPDGM[147]C[339]IDAEGK             | 1 |
|                                                                                                                                                                                                                                                            |      |       |      |      |   |   | 3 | C[330]GESPVWEEVSNLLFVDIPAK               | 2 |
| RGS12_HUMAN (O14924) Regulator of G-protein signaling 12 (RGS12) [MASS=156356]                                                                                                                                                                             | *    | 1.66  | *    | *    | * | 1 | 2 | DC[330]VSNNLSNANLPSVQSC[339]RRLR         | 1 |
| RHG07_HUMAN (Q96QB1) Rho-GTPase-activating protein 7 (Rho-type GTPase-activating protein 7) (Deleted in liver cancer 1 protein) (Dlc-1) (HP protein) (StAR-related lipid transfer protein 12) (StARD12) (START domain-containing protein 12) [MASS=122826] | *    | 1.74  | *    | *    | * | 2 | 1 | SSHHSK                                   | 1 |
|                                                                                                                                                                                                                                                            |      |       |      |      |   |   | 2 | TGSFHGPGHISLR                            | 1 |
| RHG12_HUMAN (Q8IWW6) Rho-GTPase-activating protein 12 [MASS=96254]                                                                                                                                                                                         | *    | 6.38  | *    | *    | * | 2 | 3 | PC[330]FPENESSPSPKHQDTASSPKDQEK          | 1 |
|                                                                                                                                                                                                                                                            |      |       |      |      |   |   | 3 | FAVNHDEKLDLNDKWEIHVITGALK                | 1 |
| RHOA_HUMAN (P61586) Transforming protein RhoA precursor (H12) [MASS=21768]                                                                                                                                                                                 | 1.00 | 11.92 | 0.79 | 0.00 | 2 | 2 | 2 | HFC[339]PNVPIILVGNK                      | 1 |
|                                                                                                                                                                                                                                                            |      |       |      |      |   |   | 1 | TC[330]LLIVFSK                           | 1 |
|                                                                                                                                                                                                                                                            |      |       |      |      |   |   | 2 | HFC[330]PNVPIILVGNK                      | 1 |
| RHOB_HUMAN (P62745) Rho-related GTP-binding protein RhoB precursor (H6) [MASS=22123]                                                                                                                                                                       | 1.00 | 13.27 | 0.61 | 0.07 | 2 | 2 | 2 | IQAYDYLEC[330]SAK                        | 1 |
|                                                                                                                                                                                                                                                            |      |       |      |      |   |   | 2 | HFC[330]PNVPIILVANK                      | 1 |
| RHOQ_HUMAN (P17081) Rho-related GTP-binding protein RhoQ (Ras-related GTP-binding protein TC10) [MASS=22659]                                                                                                                                               | 0.00 | 16.10 | 0.86 | 0.00 | 1 | 1 | 3 | TC[330]LLMSYANDAFPEEYVPTVFDHYAVSVTVGGK   | 1 |
| RIF1_HUMAN (Q5UIP0) Telomere-associated protein RIF1 (Rap1-interacting factor 1 homolog) [MASS=274464]                                                                                                                                                     | *    | 1.82  | *    | *    | * | 2 | 2 | TETLALTKEVWVYLLM[147]JR                  | 1 |
|                                                                                                                                                                                                                                                            |      |       |      |      |   |   | 2 | VTESNLEKAKTM[147]ELNVGNEASFHGQER         | 1 |



|                                                                                                                                                                                         |      |       |      |      |   |   |   |                                          |   |
|-----------------------------------------------------------------------------------------------------------------------------------------------------------------------------------------|------|-------|------|------|---|---|---|------------------------------------------|---|
| RIMS1_HUMAN (Q86UR5) Regulating synaptic membrane exocytosis protein 1 (Rab3-interacting molecule 1) (RIM 1) [MASS=189071]                                                              | 0.00 | 2.30  | 0.43 | 0.00 | 1 | 2 | 2 | SC[330]DNVSAKSSSDVSDVSAISR               | 1 |
|                                                                                                                                                                                         |      |       |      |      |   |   | 3 | STIQRSTETGMAAEMRK                        | 1 |
| RINT1_HUMAN (Q6NUQ1) RAD50-interacting protein 1 (RAD50 interactor 1) (Protein RINT-1) (HsRINT-1) [MASS=90631]                                                                          | 0.00 | 7.45  | 3.54 | 0.00 | 1 | 3 | 3 | LATDIPC[339]LLYDDNLFC[330]HLVDEVLLFER    | 1 |
|                                                                                                                                                                                         |      |       |      |      |   |   | 2 | EAC[339]IVLNLNVGSALLK                    | 2 |
|                                                                                                                                                                                         |      |       |      |      |   |   | 3 | DLVDDFRIRLTQVM[147]K                     | 1 |
| RL11_HUMAN (P62913) 60S ribosomal protein L11 (CLL-associated antigen KW-12) [MASS=20121]                                                                                               | 0.86 | 4.52  | 1.28 | 0.00 | 1 | 1 | 2 | IAVHC[339]TVR                            | 1 |
| RL18A_HUMAN (Q02543) 60S ribosomal protein L18a [MASS=20762]                                                                                                                            | 1.00 | 12.50 | 0.77 | 0.02 | 2 | 3 | 2 | C[339]HTPPLYR                            | 1 |
|                                                                                                                                                                                         |      |       |      |      |   |   | 1 | ASGTLR                                   | 1 |
|                                                                                                                                                                                         |      |       |      |      |   |   | 2 | C[330]HTPPLYR                            | 1 |
|                                                                                                                                                                                         |      |       |      |      |   |   | 2 | AHSIQIMK                                 | 1 |
| RL1D1_HUMAN (O76021) Ribosomal L1 domain-containing protein 1 (Cellular senescence-inhibited gene protein) (Protein PBK1) (CATX-11) [MASS=54972]                                        | 0.00 | 8.98  | 0.36 | 0.00 | 1 | 3 | 2 | KALPASETPKAAESETPGK                      | 1 |
|                                                                                                                                                                                         |      |       |      |      |   |   | 2 | EQVRKAVDALLTHC[330]K                     | 1 |
|                                                                                                                                                                                         |      |       |      |      |   |   | 2 | AVDALLTHC[330]K                          | 1 |
| RL9_HUMAN (P32969) 60S ribosomal protein L9 [MASS=21863]                                                                                                                                | 0.78 | 5.73  | 1.50 | 0.00 | 1 | 1 | 2 | TIC[339]SHVQNM[147]IK                    | 1 |
| RLP24_HUMAN (Q9UHA3) Probable ribosome biogenesis protein RLP24 (Ribosomal protein L24-like) [MASS=19621]                                                                               | *    | 7.36  | *    | *    | * | 1 | 3 | ELTVDNSFEFEK                             | 1 |
| RM03_HUMAN (P09001) Mitochondrial 39S ribosomal protein L3 (L3mt) (MRP-L3) [MASS=38632]                                                                                                 | 0.00 | 14.66 | *    | *    | * | 2 | 2 | MPGWRLLTQVGAQVLGRLGDGLGAALGPGNR          | 1 |
|                                                                                                                                                                                         |      |       |      |      |   |   | 2 | VGLIALKLG[147]MPLWTKDGQK                 | 1 |
| RN168_HUMAN (Q81YW5) RING finger protein 168 [MASS=65020]                                                                                                                               | 0.00 | 8.23  | 0.33 | 0.00 | 1 | 4 | 2 | ASLC[339]C[330]PFC[330]RR                | 1 |
|                                                                                                                                                                                         |      |       |      |      |   |   | 2 | ELC[330]VLSHERPK                         | 1 |
|                                                                                                                                                                                         |      |       |      |      |   |   | 2 | SDPVTPKSEK                               | 1 |
|                                                                                                                                                                                         |      |       |      |      |   |   | 3 | SQFGSASHSEAVQEV                          | 1 |
| RNF37_HUMAN (O94941) RING finger protein 37 (Ubiquitin-conjugating enzyme 7-interacting protein 5) (U-box domain-containing protein 5) [MASS=58965]                                     | *    | 12.94 | *    | *    | * | 3 | 3 | M[147]KATNEPSLTHM[147]DC[339]STGPLSHEQK  | 1 |
|                                                                                                                                                                                         |      |       |      |      |   |   | 3 | PPFGAM[147]EATLPSPAVVAQELWNKGALSLSHVAHLR | 1 |
|                                                                                                                                                                                         |      |       |      |      |   |   | 2 | SLPMTTC[330]TAC[330]QR                   | 1 |
| ROCK1_HUMAN (Q13464) Rho-associated protein kinase 1 (EC 2.7.11.1) (Rho-associated, coiled-coil-containing protein kinase 1) (p160 ROCK-1) (p160ROCK) (NY-REN-35 antigen) [MASS=158174] | *    | 6.57  | *    | *    | * | 4 | 2 | YLSSANPNDNRTSSNADKSLQESLQK               | 1 |
|                                                                                                                                                                                         |      |       |      |      |   |   | 3 | AKLLDLS DSTSVASFPSAETDGNLPESR            | 1 |
|                                                                                                                                                                                         |      |       |      |      |   |   | 3 | EAQDMLNHSEKEKNNLEIDLNYK                  | 1 |
|                                                                                                                                                                                         |      |       |      |      |   |   | 2 | TESDTAVRLRK                              | 1 |

|                                                                                                                                                                                                                                                                              |      |      |      |      |   |   |   |                                           |   |
|------------------------------------------------------------------------------------------------------------------------------------------------------------------------------------------------------------------------------------------------------------------------------|------|------|------|------|---|---|---|-------------------------------------------|---|
| RP1_HUMAN (P56715) Oxygen-regulated protein 1 (Retinitis pigmentosa RP1 protein) (Retinitis pigmentosa 1 protein) [MASS=240660]                                                                                                                                              | 0.00 | 1.86 | 1.28 | 0.00 | 1 | 3 | 3 | TLELIDISSKNIM[147]EEK                     | 1 |
|                                                                                                                                                                                                                                                                              |      |      |      |      |   |   | 2 | INTKGRITK                                 | 1 |
|                                                                                                                                                                                                                                                                              |      |      |      |      |   |   | 2 | RLATPPSLDFC[339]YDSK                      | 1 |
| RPC1_HUMAN (O14802) DNA-directed RNA polymerase III largest subunit (EC 2.7.7.6) (RPC155) (RPC1) [MASS=155748]                                                                                                                                                               | *    | 0.50 | *    | *    | * | 1 | 1 | FGLAKMK                                   | 1 |
| RPGF6_HUMAN (Q8TEU7) Rap guanine nucleotide exchange factor 6 (PDZ domain-containing guanine nucleotide exchange factor 2) (PDZ-GEF2) (RA-GEF-2) [MASS=179406]                                                                                                               | *    | 5.31 | *    | *    | * | 4 | 2 | ESQLSMLQLSTIEVATQLSM[147]R                | 2 |
|                                                                                                                                                                                                                                                                              |      |      |      |      |   |   | 3 | QVVRMTSANM[147]DPAMMFRQR                  | 1 |
|                                                                                                                                                                                                                                                                              |      |      |      |      |   |   | 2 | ARYERYSGNQVLC[330]SETIAR                  | 1 |
|                                                                                                                                                                                                                                                                              |      |      |      |      |   |   | 3 | TKVDDC[339]QFVC[339]IAQQDYWRILNHVEK       | 1 |
| RPGR1_HUMAN (Q96KN7) X-linked retinitis pigmentosa GTPase regulator-interacting protein 1 (RPGR-interacting protein 1) [MASS=146679]                                                                                                                                         | 0.00 | 4.28 | 1.50 | 0.00 | 1 | 2 | 3 | YPKADSEKM[147]C[330]IEIVSLAFYPEAEVMSDENIK | 1 |
|                                                                                                                                                                                                                                                                              |      |      |      |      |   |   | 2 | DVAYGTRPLSLC[339]LETLPAGHGEDK             | 1 |
| RPP29_HUMAN (O95707) Ribonuclease P protein subunit p29 (EC 3.1.26.5) (hPOP4) [MASS=25425]                                                                                                                                                                                   | 0.00 | 7.27 | 0.54 | 0.00 | 1 | 1 | 2 | C[330]PSYVGITGILLQETK                     | 1 |
| RS2_HUMAN (P15880) 40S ribosomal protein S2 (S4) (LLRep3 protein) [MASS=31324]                                                                                                                                                                                               | *    | 6.83 | *    | *    | * | 1 | 3 | AFVAIGDYNGHVGLGVKC[339]SK                 | 2 |
| RS3A_HUMAN (P61247) 40S ribosomal protein S3a [MASS=29814]                                                                                                                                                                                                                   | 0.99 | 5.32 | 1.32 | 0.00 | 1 | 1 | 2 | AC[339]QSIYPLHDFVFR                       | 1 |
| RSF1_HUMAN (Q96T23) Remodeling and spacing factor 1 (Rsf-1) (Hepatitis B virus X-associated protein) (HBV pX-associated protein 8) (p325 subunit of RSF chromatin remodelling complex) [MASS=163004]                                                                         | *    | 1.40 | *    | *    | * | 1 | 3 | LNDLSDSNLDEEESSEDFK                       | 1 |
| RTN1_HUMAN (Q16799) Reticulon-1 (Neuroendocrine-specific protein) [MASS=83617]                                                                                                                                                                                               | 0.99 | 9.54 | 0.49 | 0.00 | 1 | 3 | 2 | DHLLLEESTFAPYIDDLSEEQRRAPIQITTPVK         | 1 |
|                                                                                                                                                                                                                                                                              |      |      |      |      |   |   | 2 | QSPVAMETASTGVAGVSSAMDHTFSTTSK             | 1 |
|                                                                                                                                                                                                                                                                              |      |      |      |      |   |   | 2 | YTDC[330]LQFYVNSTLK                       | 1 |
| RUVB1_HUMAN (Q9Y265) RuvB-like 1 (EC 3.6.1.-) (49 kDa TATA box-binding protein-interacting protein) (49 kDa TBP-interacting protein) (TIP49a) (Pontin 52) (Nuclear matrix protein 238) (NMP 238) (54 kDa erythrocyte cytosolic protein) (ECP-54) (TIP60-associ) [MASS=50228] | 0.00 | 3.73 | 0.45 | 0.00 | 1 | 1 | 2 | VPFC[330]PM[147]VGSEVYSTEIK               | 1 |

|                                                                                                                                                                                                             |      |       |      |      |   |   |                                                                                                                                                                                       |                                 |   |
|-------------------------------------------------------------------------------------------------------------------------------------------------------------------------------------------------------------|------|-------|------|------|---|---|---------------------------------------------------------------------------------------------------------------------------------------------------------------------------------------|---------------------------------|---|
| S19A1_HUMAN (P41440) Folate transporter 1 (Solute carrier family 19 member 1) (Placental folate transporter) (FOLT) (Reduced folate carrier protein) (RFC) (Intestinal folate carrier) (IFC-1) [MASS=64868] | 0.00 | 2.88  | 0.55 | 0.00 | 1 | 1 | 2                                                                                                                                                                                     | HC[330]QRGHHPRQPPAQGLR          | 1 |
| S27A4_HUMAN (Q6P1M0) Long-chain fatty acid transport protein 4 (EC 6.2.1.-) (Fatty acid transport protein 4) (FATP-4) (Solute carrier family 27 member 4) [MASS=72064]                                      | 0.00 | 7.47  | 0.81 | 0.00 | 1 | 3 | 2 YNC[330]TIVQYIGELC[330]R<br>1 DRTGDTFR<br>3 NEFVGLWLGMAKLGVEAALINTNLRR                                                                                                              | 1<br>1<br>1                     |   |
| SACS_HUMAN (Q9NZJ4) Sacsin [MASS=436973]                                                                                                                                                                    | *    | 3.08  | *    | *    | * | 7 | 3 NHPSVSWLKM[147]VWK<br>3 LDNC[339]TM[147]FRFPLRNAEMAK<br>2 LPADLRLSISVIDSSDEATIRLANMLK<br>2 SIYEFLSAEK<br>2 IVSSLDLYK<br>3 RLGLVPC[330]GAVGVQLSEIQDQKWTVK<br>2 GGVAAC[339]ITHNYKKPHR | 1<br>1<br>1<br>1<br>1<br>1<br>1 |   |
| SAM50_HUMAN (Q9Y512) Sorting and assembly machinery component 50 homolog [MASS=51962]                                                                                                                       | 1.00 | 10.02 | 1.55 | 0.02 | 7 | 3 | 2 THFFLNAGNLC[330]NLNYGEGPK<br>2 IC[339]DGVQFGAGIR<br>2 THFFLNAGNLC[339]NLNYGEGPK<br>2 TKDDIIC[339]EIGDVFK<br>2 TKDDIIC[330]EIGDVFK<br>2 IC[330]DGVQFGAGIR                            | 1<br>1<br>2<br>1<br>1<br>1      |   |
| SAPS3_HUMAN (Q5H9R7) SAPS domain family member 3 (Sporulation-induced transcript 4-associated protein SAPL) (Protein phosphatase 6 regulatory subunit 3) [MASS=97669]                                       | *    | 2.18  | *    | *    | * | 1 | 3 EDVTLKELMDEEDVLQEC[330]K                                                                                                                                                            | 1                               |   |

|                                                                                                                                                                                                                                                                             |      |       |      |      |    |   |   |                                                      |   |
|-----------------------------------------------------------------------------------------------------------------------------------------------------------------------------------------------------------------------------------------------------------------------------|------|-------|------|------|----|---|---|------------------------------------------------------|---|
|                                                                                                                                                                                                                                                                             |      |       |      |      |    |   | 1 | GC[339]SFLPDPYQK                                     | 1 |
|                                                                                                                                                                                                                                                                             |      |       |      |      |    |   | 3 | LGPGMADIC[330]KNIYSQYSEIAIQM[147]M[147]M[147]HMQPK   | 1 |
|                                                                                                                                                                                                                                                                             |      |       |      |      |    |   | 3 | QC[339]DQFVAEYEPVLIIEILVEVM[147]DPSFVC[339]LK        | 2 |
| SAP_HUMAN (P07602) Proactivator polypeptide precursor [Contains: Saposin A (Protein A); Saposin B-Val; Saposin B (Sphingolipid activator protein 1) (SAP-1) (Cerebroside sulfate activator) (CSAct) (Dispersin) (Sulfatide/GM1 activator); Saposin C (Co-beta- [MASS=58112] | 1.00 | 27.10 | 1.72 | 0.03 | 10 | 6 | 3 | QC[339]DQFVAEYEPVLIIEILVEVMDPSFVC[339]LK             | 1 |
|                                                                                                                                                                                                                                                                             |      |       |      |      |    |   | 2 | GC[339]SFLPDPYQK                                     | 3 |
|                                                                                                                                                                                                                                                                             |      |       |      |      |    |   | 3 | PGEVC[339]SALNLC[339]ESLQK                           | 1 |
|                                                                                                                                                                                                                                                                             |      |       |      |      |    |   | 3 | TNSTFVQALVEHVKEEC[339]DRLGPGMADIC[339]K              | 1 |
|                                                                                                                                                                                                                                                                             |      |       |      |      |    |   | 2 | SKPQPKDNGDVC[339]QDC[339]IQMVTDIQTAVR                | 1 |
|                                                                                                                                                                                                                                                                             |      |       |      |      |    |   | 2 | GC[330]SFLPDPYQK                                     | 1 |
|                                                                                                                                                                                                                                                                             |      |       |      |      |    |   | 1 | GC[330]SFLPDPYQK                                     | 2 |
| SAR1A_HUMAN (Q9NR31) GTP-binding protein SAR1a (COPII-associated small GTPase) [MASS=22367]                                                                                                                                                                                 | *    | 3.54  | *    | *    | *  | 1 | 2 | WLSQYID                                              | 1 |
| SATB1_HUMAN (Q01826) DNA-binding protein SATB1 (Special AT-rich sequence-binding protein 1) [MASS=85956]                                                                                                                                                                    | 0.00 | 8.26  | 1.19 | 0.00 | 1  | 3 | 2 | AGISQAVFARVAFNRTQGLLSEILR                            | 1 |
|                                                                                                                                                                                                                                                                             |      |       |      |      |    |   | 3 | MQGVPLKHSGHLM[147]KTNLR                              | 1 |
|                                                                                                                                                                                                                                                                             |      |       |      |      |    |   | 3 | SQGWLC[339]ELLRWKEDPSPENR                            | 1 |
| SATT_HUMAN (P43007) Neutral amino acid transporter A (SATT) (Alanine/serine/cysteine/threonine transporter) (ASCT1) [MASS=55723]                                                                                                                                            | 1.00 | 2.07  | 0.42 | 0.15 | 4  | 1 | 2 | C[339]IEENNGVDKR                                     | 1 |
|                                                                                                                                                                                                                                                                             |      |       |      |      |    |   | 2 | C[330]IEENNGVDKR                                     | 3 |
| SBP1_HUMAN (Q13228) Selenium-binding protein 1 [MASS=52313]                                                                                                                                                                                                                 | 0.92 | 4.03  | 1.21 | 0.00 | 1  | 2 | 2 | DGLIPLEIR                                            | 1 |
|                                                                                                                                                                                                                                                                             |      |       |      |      |    |   | 2 | SPQYC[330]QVIHR                                      | 1 |
| SCN4A_HUMAN (P35499) Sodium channel protein type 4 subunit alpha (Sodium channel protein type IV subunit alpha) (Voltage-gated sodium channel subunit alpha Nav1.4) (Sodium channel protein, skeletal muscle subunit alpha) (SkM1) [MASS=208031]                            | 0.00 | 2.51  | 0.37 | 0.00 | 1  | 3 | 3 | VLIHALFSMFIM[147]ITILTNC[330]VFM[147]TM[147]SDPPPWSK | 1 |
|                                                                                                                                                                                                                                                                             |      |       |      |      |    |   | 2 | EGLLANTMSK                                           | 1 |
|                                                                                                                                                                                                                                                                             |      |       |      |      |    |   | 1 | C[330]AHK                                            | 1 |
| SCN5A_HUMAN (Q14524) Sodium channel protein type 5 subunit alpha (Sodium channel protein type V subunit alpha) (Voltage-gated sodium channel subunit alpha Nav1.5) (Sodium channel protein, cardiac muscle alpha-subunit) (HH1) [MASS=227161]                               | 0.00 | 2.73  | 0.73 | 0.00 | 1  | 3 | 3 | KNSTVDC[330]NGVVSLGAGDPEATSPGSHLLR                   | 1 |
|                                                                                                                                                                                                                                                                             |      |       |      |      |    |   | 3 | RKHEEVSAM[147]VIQR                                   | 1 |
|                                                                                                                                                                                                                                                                             |      |       |      |      |    |   | 1 | QQESQPVSGWPR                                         | 1 |

|                                                                                                                                                                                        |      |       |      |      |    |   |  |   |                                        |   |
|----------------------------------------------------------------------------------------------------------------------------------------------------------------------------------------|------|-------|------|------|----|---|--|---|----------------------------------------|---|
|                                                                                                                                                                                        |      |       |      |      |    |   |  | 3 | DIPDGATVLVGGFGLC[339]GIPENLIDALLK      | 4 |
| SCOT_HUMAN (P55809) Succinyl-CoA:3-ketoacid-coenzyme A transferase 1, mitochondrial precursor (EC 2.8.3.5) (Somatic-type succinyl CoA:3-oxoacid CoA-transferase) (Scot-S) [MASS=56157] | 1.00 | 14.04 | 1.63 | 0.05 | 12 | 5 |  | 2 | STGC[339]DFAVSPK                       | 1 |
|                                                                                                                                                                                        |      |       |      |      |    |   |  | 3 | DIPDGATVLVGGFGLC[330]GIPENLIDALLK      | 2 |
|                                                                                                                                                                                        |      |       |      |      |    |   |  | 1 | C[330]TLPLTGK                          | 1 |
|                                                                                                                                                                                        |      |       |      |      |    |   |  | 1 | C[339]TLPLTGK                          | 2 |
|                                                                                                                                                                                        |      |       |      |      |    |   |  | 2 | DIPDGATVLVGGFGLC[339]GIPENLIDALLK      | 2 |
|                                                                                                                                                                                        |      |       |      |      |    |   |  | 2 | MVKGMGGAMDLVSSAKTK                     | 1 |
|                                                                                                                                                                                        |      |       |      |      |    |   |  | 2 | NFNLPM[147]C[339]K                     | 1 |
| SCPDH_HUMAN (Q8NBX0) Probable saccharopine dehydrogenase (EC 1.5.1.9) [MASS=47151]                                                                                                     | 0.98 | 6.53  | 1.68 | 0.00 | 1  | 1 |  | 3 | LGRPTLSSEVGIIC[339]DIANPASLDEMAK       | 1 |
| SCRN1_HUMAN (Q12765) Secernin-1 [MASS=46382]                                                                                                                                           | 1.00 | 7.49  | 0.78 | 0.00 | 2  | 2 |  | 2 | QEESITVQTMNMLR                         | 1 |
|                                                                                                                                                                                        |      |       |      |      |    |   |  | 2 | SSPC[330]IHIFTGTPDPSR                  | 1 |
|                                                                                                                                                                                        |      |       |      |      |    |   |  | 2 | SSPC[339]IHIFTGTPDPSR                  | 1 |
| SDHL_HUMAN (P20132) L-serine dehydratase (EC 4.3.1.17) (L-serine deaminase) [MASS=34702]                                                                                               | 0.00 | 9.15  | 2.49 | 0.00 | 1  | 2 |  | 2 | M[147]MSGEPLHVK                        | 1 |
|                                                                                                                                                                                        |      |       |      |      |    |   |  | 2 | M[147]DSAQPSGSFKIRGIGHFC[339]K         | 1 |
| SEM3C_HUMAN (Q99985) Semaphorin-3C precursor (Semaphorin E) (Sema E) [MASS=85207]                                                                                                      | 0.00 | 3.46  | 2.02 | 0.00 | 1  | 1 |  | 2 | ALPFHPKDIMGAFSHSEMQMINQYC[339]K        | 1 |
| SEM3D_HUMAN (O95025) Semaphorin-3D precursor [MASS=89651]                                                                                                                              | *    | 2.19  | *    | *    | *  | 1 |  | 3 | DHIFLLSLVDLNKNFKK                      | 1 |
| SEM5B_HUMAN (Q9P283) Semaphorin-5B precursor [MASS=119866]                                                                                                                             | 0.00 | 4.85  | 0.09 | 0.00 | 1  | 3 |  | 2 | RSC[339]QSKGK                          | 1 |
|                                                                                                                                                                                        |      |       |      |      |    |   |  | 3 | NTPWTPWLPVNVTTQGGARQEQR                | 1 |
|                                                                                                                                                                                        |      |       |      |      |    |   |  | 3 | VFM[147]C[330]GTNAFSPMC[330]TSRQVGNLSR | 1 |
| SEPT5_HUMAN (Q99719) Septin-5 (Peanut-like protein 1) (Cell division control-related protein 1) (CDCrel-1) [MASS=42777]                                                                | 1.00 | 14.91 | 1.56 | 0.27 | 4  | 4 |  | 2 | DVTC[330]DVHYENYR                      | 1 |
|                                                                                                                                                                                        |      |       |      |      |    |   |  | 2 | DVTC[339]DVHYENYRAHC[339]IQQMTSK       | 1 |
|                                                                                                                                                                                        |      |       |      |      |    |   |  | 2 | ADC[330]LVPSEIRK                       | 1 |
|                                                                                                                                                                                        |      |       |      |      |    |   |  | 2 | AHC[330]IQQM[147]TSK                   | 1 |
|                                                                                                                                                                                        |      |       |      |      |    |   |  | 2 | NLEGYVGFANLPNQVYRK                     | 1 |
| SEPT7_HUMAN (Q16181) Septin-7 (CDC10 protein homolog) [MASS=50680]                                                                                                                     | 0.99 | 13.73 | 1.06 | 0.00 | 2  | 4 |  | 3 | IKIYEFPETDDEEENK                       | 1 |
|                                                                                                                                                                                        |      |       |      |      |    |   |  | 2 | ADTLTPEEC[339]QQFKK                    | 2 |
|                                                                                                                                                                                        |      |       |      |      |    |   |  | 2 | QIM[147]KEIQEHKIK                      | 1 |
| SEPT8_HUMAN (Q92599) Septin-8 [MASS=55625]                                                                                                                                             | 0.99 | 4.15  | 0.96 | 0.00 | 1  | 1 |  | 2 | SVTQGFNFNLC[339]VGETGIGK               | 1 |

|                                                                                                                                                                                               |      |       |      |      |   |   |   |                                            |   |
|-----------------------------------------------------------------------------------------------------------------------------------------------------------------------------------------------|------|-------|------|------|---|---|---|--------------------------------------------|---|
| SERB_HUMAN (P78330) Phosphoserine phosphatase (EC 3.1.3.3) (PSP) (O-phosphoserine phosphohydrolase) (PSPase) (L-3-phosphoserine phosphatase) [MASS=25008]                                     | 0.00 | 24.89 | 0.82 | 0.00 | 1 | 3 | 2 | SIVEHVASKLNIPATNVFANRLK                    | 1 |
|                                                                                                                                                                                               |      |       |      |      |   |   | 2 | IC[330]GVEDAVSEM[147]TRRAMGGAVPFK          | 1 |
|                                                                                                                                                                                               |      |       |      |      |   |   | 2 | RAMGGAVPFK                                 | 1 |
| SERC3_HUMAN (Q13530) Serine incorporator 3 (Tumor differentially expressed protein 1) [MASS=52580]                                                                                            | *    | 2.54  | *    | *    | * | 1 | 3 | SC[330]NPNLM[147]SFITR                     | 1 |
|                                                                                                                                                                                               |      |       |      |      |   |   | 3 | SINSEVLKFSLDSQVNHMRK                       | 1 |
|                                                                                                                                                                                               |      |       |      |      |   |   | 3 | LNLFLRGNLSLWQLTSQETHQLQSC[330]LK           | 1 |
|                                                                                                                                                                                               |      |       |      |      |   |   | 2 | IAGLSKSLETSSALSPSLK                        | 1 |
| SETX_HUMAN (Q7Z333) Probable helicase senataxin (EC 3.6.1.-) (SEN1 homolog) [MASS=302951]                                                                                                     | *    | 7.13  | *    | *    | * | 8 | 3 | PVGEMKNESC[339]NVLHPQSPNNSNRQGC[339]K      | 1 |
|                                                                                                                                                                                               |      |       |      |      |   |   | 3 | QTEAIRC[330]SSDWPFQPYLVFDVGDGSER           | 1 |
|                                                                                                                                                                                               |      |       |      |      |   |   | 3 | YEM[147]FLNFGQC[330]GPPASLC[339]QSISRPVPVR | 1 |
|                                                                                                                                                                                               |      |       |      |      |   |   | 2 | MHPDIC[339]LFPSNYVYNRNLK                   | 1 |
|                                                                                                                                                                                               |      |       |      |      |   |   | 3 | LSLLAQASVITFPSDSPQNSSQLQR                  | 1 |
| SF01_HUMAN (Q15637) Splicing factor 1 (Zinc finger protein 162) (Transcription factor ZFM1) (Zinc finger gene in MEN1 locus) (Mammalian branch point-binding protein mBBP) (BBP) [MASS=68198] | 0.00 | 4.23  | 1.46 | 0.00 | 1 | 2 | 3 | HNLITEMVALNPDK                             | 1 |
|                                                                                                                                                                                               |      |       |      |      |   |   | 2 | C[339]GGAGHIASDC[339]K                     | 1 |
| SF3A1_HUMAN (Q15459) Splicing factor 3 subunit 1 (Spliceosome-associated protein 114) (SAP 114) (SF3a120) [MASS=88886]                                                                        | *    | 1.01  | *    | *    | * | 1 | 2 | NYQDFDLR                                   | 1 |
| SFXN1_HUMAN (Q9H9B4) Sideroflexin-1 (Tricarboxylate carrier protein) (TCC) [MASS=35488]                                                                                                       | 0.00 | 5.92  | 1.50 | 0.00 | 1 | 1 | 2 | FVPFAAVAAANC[339]JINIPLMR                  | 1 |
| SFXN3_HUMAN (Q9BWM7) Sideroflexin-3 [MASS=35503]                                                                                                                                              | 0.00 | 8.10  | *    | *    | * | 1 | 2 | QRELQVGIPVADEAGQRLGYSVTAAK                 | 1 |
|                                                                                                                                                                                               |      |       |      |      |   |   | 3 | EPNAEC[339]M[147]NQIEDNDDFQLQK             | 1 |
|                                                                                                                                                                                               |      |       |      |      |   |   | 3 | VPLTSNDEDEDKEKMQC[339]DNNIK                | 2 |
| SGOL2_HUMAN (Q562F6) Shugoshin-like 2 (Tripin) [MASS=144738]                                                                                                                                  | 0.00 | 6.72  | 1.09 | 0.00 | 2 | 4 | 3 | ELQIPALSTRDNENQC[339]DYR                   | 1 |
|                                                                                                                                                                                               |      |       |      |      |   |   | 2 | DKETISENLQVTNEFQTVDLLIK                    | 1 |
| SHOC2_HUMAN (Q9UQ13) Leucine-rich repeat protein SHOC-2 (Ras-binding protein Sur-8) [MASS=64888]                                                                                              | 0.00 | 4.64  | 0.47 | 0.00 | 1 | 1 | 3 | QLPAEIGELC[330]NLITLDVAHNQLEHLPK           | 1 |

|                                                                                                                                                                                                                                                                              |                      |       |       |      |   |   |   |                                             |   |
|------------------------------------------------------------------------------------------------------------------------------------------------------------------------------------------------------------------------------------------------------------------------------|----------------------|-------|-------|------|---|---|---|---------------------------------------------|---|
| SHPS1_HUMAN (P78324) Tyrosine-protein phosphatase non-receptor type substrate 1 precursor (SHP substrate 1) (SHPS-1) (Inhibitory receptor SHPS-1) (Signal-regulatory protein alpha-1) (Sirp-alpha-1) (Sirp-alpha-2) (Sirp-alpha-3) (MyD-1 antigen) (Brain Ig-I [MASS=54812]) | 1.00                 | 6.76  | 0.35  | 0.20 | 7 | 2 | 2 | ATPQHTVSFTC[330]ESHGFSR                     | 2 |
|                                                                                                                                                                                                                                                                              |                      |       |       |      |   |   | 3 | ATPQHTVSFTC[330]ESHGFSR                     | 1 |
|                                                                                                                                                                                                                                                                              |                      |       |       |      |   |   | 2 | ATPQHTVSFTC[339]ESHGFSR                     | 2 |
|                                                                                                                                                                                                                                                                              |                      |       |       |      |   |   | 2 | LTC[339]QVEHDGQPAVSK                        | 1 |
| 2                                                                                                                                                                                                                                                                            | LTC[330]QVEHDGQPAVSK | 1     |       |      |   |   |   |                                             |   |
| SIDT1_HUMAN (Q9NXL6) SID1 transmembrane family member 1 precursor [MASS=93866]                                                                                                                                                                                               | *                    | 1.09  | *     | *    | * | 1 | 2 | SPRQPPAPR                                   | 1 |
| SIM2_HUMAN (Q14190) Single-minded homolog 2 [MASS=73218]                                                                                                                                                                                                                     | 0.00                 | 4.95  | 1.55  | 0.00 | 1 | 1 | 3 | AAPEC[339]C[339]APPTPEAPGAPAQLPFVLLNYHRVLAR | 1 |
| SIRB1_HUMAN (O00241) Signal-regulatory protein beta-1 precursor (SIRP-beta-1) (CD172b antigen) [MASS=43255]                                                                                                                                                                  | 0.99                 | 8.29  | 0.34  | 0.18 | 2 | 2 | 3 | ATPEHTVSFTC[330]ESHGFSR                     | 1 |
|                                                                                                                                                                                                                                                                              |                      |       |       |      |   |   | 3 | GLQLTWLENGNVS                               | 1 |
|                                                                                                                                                                                                                                                                              |                      |       |       |      |   |   | 2 | ATPEHTVSFTC[330]ESHGFSR                     | 1 |
| SIRT2_HUMAN (Q8IXJ6) NAD-dependent deacetylase sirtuin-2 (EC 3.5.1.-) (SIR2-like) (SIR2-like protein 2) [MASS=43182]                                                                                                                                                         | 0.99                 | 5.66  | 0.85  | 0.00 | 1 | 1 | 3 | C[330]EDC[330]QSLVKPDIVFFGESLPR             | 1 |
| SIVA_HUMAN (O15304) Apoptosis regulatory protein Siva (CD27-binding protein) (CD27BP) [MASS=18695]                                                                                                                                                                           | *                    | 14.86 | *     | *    | * | 1 | 2 | LIRSLGQASEADPSGVASAC[330]SSC[339]VR         | 1 |
| SKIV2_HUMAN (Q15477) Helicase SKI2W (EC 3.6.1.-) (Helicase-like protein) (HLP) [MASS=137798]                                                                                                                                                                                 | *                    | 1.77  | *     | *    | * | 1 | 3 | TDPWLLAVLGAPVPSDLQAQR                       | 1 |
| SLIT1_HUMAN (O75093) Slit homolog 1 protein precursor (Slit-1) (Multiple epidermal growth factor-like domains 4) [MASS=167924]                                                                                                                                               | *                    | 3.46  | *     | *    | * | 3 | 2 | GAFDDM[147]KELERLR                          | 1 |
|                                                                                                                                                                                                                                                                              |                      |       |       |      |   |   | 3 | EQYFIPGTEDYQLNSEC[339]NSDVVC[339]PHK        | 1 |
|                                                                                                                                                                                                                                                                              |                      |       |       |      |   |   | 2 | GLDGLRTLMLRNNR                              | 1 |
| SLIT2_HUMAN (O94813) Slit homolog 2 protein precursor (Slit-2) [Contains: Slit homolog 2 protein N-product; Slit homolog 2 protein C-product] [MASS=169869]                                                                                                                  | 0.00                 | 1.18  | 11.36 | 0.00 | 1 | 1 | 2 | NLQLDYNQISC[339]IEDGAFR                     | 1 |
| SLUR1_HUMAN (P55000) Secreted Ly-6/uPAR-related protein 1 precursor (SLURP-1) (ARS component B) (ARS(Component B)-81/S) (Anti-neoplastic urinary protein) (ANUP) [MASS=11186]                                                                                                | *                    | 14.56 | *     | *    | * | 1 | 2 | EPM[147]TSASC[339]RTITRC[339]K              | 1 |
| SMBT2_HUMAN (Q5VUG0) Scm-like with four MBT domains protein 2 [MASS=100562]                                                                                                                                                                                                  | *                    | 5.37  | *     | *    | * | 2 | 2 | KIAVVQPEKQLPPTVPVK                          | 1 |
|                                                                                                                                                                                                                                                                              |                      |       |       |      |   |   | 3 | NNPDYVWATIITTC[330]GQLLLRYC[330]GYGEDR      | 1 |

|                                                                                                                                                                                                                                                                              |      |      |      |      |   |   |   |                                       |    |
|------------------------------------------------------------------------------------------------------------------------------------------------------------------------------------------------------------------------------------------------------------------------------|------|------|------|------|---|---|---|---------------------------------------|----|
|                                                                                                                                                                                                                                                                              |      |      |      |      |   |   | 2 | GYEYC[339]R                           | 10 |
| SMCA1_HUMAN (P28370) Probable global transcription activator SNF2L1 (EC 3.6.1.-) (ATP-dependent helicase SMARCA1) (SWI/SNF-related matrix-associated actin-dependent regulator of chromatin subfamily A member 1) [MASS=114731]                                              | *    | 3.59 | *    | *    | * | 4 |   |                                       |    |
|                                                                                                                                                                                                                                                                              |      |      |      |      |   |   | 2 | TAM[147]EFQR                          | 1  |
|                                                                                                                                                                                                                                                                              |      |      |      |      |   |   | 3 | LFELLEKEILYYR                         | 1  |
|                                                                                                                                                                                                                                                                              |      |      |      |      |   |   | 2 | IQYGTSKGGK                            | 1  |
|                                                                                                                                                                                                                                                                              |      |      |      |      |   |   | 2 | RLC[330]GLKVEVDM[147]EK               | 6  |
| SMCE1_HUMAN (Q969G3) SWI/SNF-related matrix-associated actin-dependent regulator of chromatin subfamily E member 1 (BRG1-associated factor 57) [MASS=46649]                                                                                                                  | 0.00 | 8.76 | 0.16 | 0.62 | 3 | 2 |   |                                       |    |
|                                                                                                                                                                                                                                                                              |      |      |      |      |   |   | 3 | GEPYM[147]SIQPAEDPDDYDDGFSM[147]K     | 1  |
| SMRA3_HUMAN (Q14527) SWI/SNF-related matrix-associated actin-dependent regulator of chromatin subfamily A member 3 (EC 3.6.1.-) (Sucrose nonfermenting protein 2-like 3) (DNA-binding protein/plasminogen activator inhibitor 1 regulator) (Helicase-like tran [MASS=113928] | *    | 4.86 | *    | *    | * | 2 |   |                                       |    |
|                                                                                                                                                                                                                                                                              |      |      |      |      |   |   | 2 | EYNVNDDSMKLGNNNTSEKADGLSK             | 1  |
|                                                                                                                                                                                                                                                                              |      |      |      |      |   |   | 3 | RVESIQC[330]FQNTTEAGSPTIM[147]LLSLK   | 1  |
| SMRC1_HUMAN (Q92922) SWI/SNF-related matrix-associated actin-dependent regulator of chromatin subfamily C member 1 (SWI/SNF complex 155 kDa subunit) (BRG1-associated factor 155) [MASS=122752]                                                                              | 0.00 | 3.80 | 0.16 | 0.00 | 1 | 2 |   |                                       |    |
|                                                                                                                                                                                                                                                                              |      |      |      |      |   |   | 2 | VHVKWILDTDIFNEWM[147]NEEDYEVDENRK     | 1  |
|                                                                                                                                                                                                                                                                              |      |      |      |      |   |   | 2 | LNPQEYLTSTAC[330]JRR                  | 1  |
| SMYD5_HUMAN (Q6GMV2) SET and MYND domain-containing protein 5 (Protein NN8-4AG) [MASS=47340]                                                                                                                                                                                 | 0.00 | 7.66 | 0.17 | 0.00 | 1 | 1 |   |                                       |    |
|                                                                                                                                                                                                                                                                              |      |      |      |      |   |   | 3 | LAATEQYHQVLC[330]PGPSQDDPLHPLNKLQEAWR | 1  |
| SN1L1_HUMAN (P57059) Serine/threonine-protein kinase SNF1-like kinase 1 (EC 2.7.11.1) (Serine/threonine-protein kinase SNF1LK) [MASS=84902]                                                                                                                                  | 0.00 | 2.68 | 0.92 | 0.00 | 1 | 1 |   |                                       |    |
|                                                                                                                                                                                                                                                                              |      |      |      |      |   |   | 3 | VLEGRFRIPFFM[147]SQDC[330]ESLIR       | 1  |



|                                                                                                                                                                                                                                                                              |      |       |      |      |   |   |   |                                                                                                                                  |                  |
|------------------------------------------------------------------------------------------------------------------------------------------------------------------------------------------------------------------------------------------------------------------------------|------|-------|------|------|---|---|---|----------------------------------------------------------------------------------------------------------------------------------|------------------|
| SNAAP_HUMAN (P54920) Alpha-soluble NSF attachment protein (SNAP-alpha) (N-ethylmaleimide-sensitive factor attachment protein, alpha) [MASS=33247]                                                                                                                            | 0.85 | 10.85 | 0.85 | 0.00 | 1 | 2 | 3 | LLEAHEEQNVDSYTESVK<br>AALC[330]HFC[330]IDM[147]LNAK                                                                              | 1<br>1           |
| SNAB_HUMAN (Q9H115) Beta-soluble NSF attachment protein (SNAP-beta) (N-ethylmaleimide-sensitive factor attachment protein, beta) [MASS=33557]                                                                                                                                | 1.00 | 8.05  | 0.96 | 0.02 | 3 | 2 | 2 | AALC[339]HFIVDELNAK<br>AALC[330]HFIVDELNAK<br>IEEAC[330]EM[147]YTR                                                               | 1<br>1<br>1      |
| SNG3_HUMAN (O43761) Synaptogyrin-3 [MASS=24555]                                                                                                                                                                                                                              | 0.98 | 21.40 | 0.68 | 0.00 | 1 | 2 | 2 | C[330]VFNGNAGAC[330]R<br>TAPGPATTQAGDAARAAIAFSFFSILSWVALTVKALQR                                                                  | 1<br>1           |
| SNX17_HUMAN (Q15036) Sorting nexin-17 [MASS=52901]                                                                                                                                                                                                                           | 0.00 | 20.00 | 0.31 | 0.00 | 1 | 4 | 2 | MRC[330]WRVTSSVPLPSGSTSSPGR<br>VLVNVLTSDQTEDVLEAVAAK                                                                             | 1<br>1           |
| SNX27_HUMAN (Q96L92) Sorting nexin-27 [MASS=50880]                                                                                                                                                                                                                           | *    | 11.72 | *    | *    | * | 2 | 3 | DC[330]PVVVSAGNSELSLQLRPGQQLREGSFR<br>KLQEFELPYVSVTSLRSQEYK<br>WVKIFTYPYFNYM[147]HEC[339]FER<br>VGMDSTTVNYFALFEVISHSFVRKLPNEFFPK | 1<br>1<br>1<br>1 |
| SNX6_HUMAN (Q9UNH7) Sorting nexin-6 (TRAF4-associated factor 2) [MASS=46648]                                                                                                                                                                                                 | *    | 3.69  | *    | *    | * | 1 | 3 | EKLQKLGEGEGSM[147]TK                                                                                                             | 1                |
| SO1C1_HUMAN (Q9NYB5) Solute carrier organic anion transporter family member 1C1 (Solute carrier family 21 member 14) (Organic anion transporter F) (OATP-F) (Organic anion-transporting polypeptide 14) (Organic anion transporter polypeptide-related protein) [MASS=78696] | 0.00 | 5.34  | 0.82 | 0.00 | 1 | 2 | 3 | QPC[339]C[330]GELK<br>IIGAGC[330]VIM[147]GVGTLLIAM[147]PQFFM[147]EQYKYER                                                         | 1<br>1           |
| SOCS5_HUMAN (O75159) Suppressor of cytokine signaling 5 (SOCS-5) (Cytokine-inducible SH2-containing protein 5) (Cytokine-inducible SH2 protein 6) (CIS-6) [MASS=61246]                                                                                                       | *    | 3.17  | *    | *    | * | 1 | 2 | NISIGDSTPQQSSPLR                                                                                                                 | 1                |
| SODC_HUMAN (P00441) Superoxide dismutase [Cu-Zn] (EC 1.15.1.1) [MASS=15804]                                                                                                                                                                                                  | 0.99 | 21.57 | 0.70 | 0.00 | 1 | 1 | 3 | GLTEGLHGHHVHEFGDNTAGC[339]TSAGPHFNPLSR                                                                                           | 1                |
| SORCN_HUMAN (P30626) Sorcin (22 kDa protein) (CP-22) (V19) [MASS=21676]                                                                                                                                                                                                      | 0.99 | 10.10 | 0.84 | 0.00 | 1 | 1 | 3 | C[339]LTQSGIAGGYKPFNLETC[339]R                                                                                                   | 1                |

|                                                                                                                                                                                                                                                                              |      |       |      |      |   |   |   |                                                 |   |
|------------------------------------------------------------------------------------------------------------------------------------------------------------------------------------------------------------------------------------------------------------------------------|------|-------|------|------|---|---|---|-------------------------------------------------|---|
| SORL_HUMAN (Q92673) Sortilin-related receptor precursor (Sorting protein-related receptor containing LDLR class A repeats) (SorLA) (SorLA-1) (Low-density lipoprotein receptor relative with 11 ligand-binding repeats) (LDLR relative with 11 ligand-binding [MASS=248440]) | 0.00 | 1.67  | 2.49 | 0.00 | 1 | 3 | 2 | PC[330]SLLC[339]LPKANNRSRC[339]R                | 1 |
|                                                                                                                                                                                                                                                                              |      |       |      |      |   |   | 2 | M[147]IPDSRLPPR                                 | 1 |
|                                                                                                                                                                                                                                                                              |      |       |      |      |   |   | 3 | EDYEC[339]DFGFK                                 | 1 |
|                                                                                                                                                                                                                                                                              |      |       |      |      |   |   | 1 | M[147]IPDSRLPPR                                 | 1 |
| SP110_HUMAN (Q9HB58) Sp110 nuclear body protein (Speckled 110 kDa) (Transcriptional coactivator Sp110) (Interferon-induced protein 41/75) [MASS=78504]                                                                                                                       | *    | 8.42  | *    | *    | * | 4 | 1 | DM[147]RLM[147]FR                               | 1 |
|                                                                                                                                                                                                                                                                              |      |       |      |      |   |   | 2 | VTQRKDDSTWNSEVMM[147]R                          | 1 |
|                                                                                                                                                                                                                                                                              |      |       |      |      |   |   | 3 | TPSTPRRVQTGAASPGHGIQEK                          | 1 |
|                                                                                                                                                                                                                                                                              |      |       |      |      |   |   | 3 | PKSDTVDFHC[330]SK                               | 6 |
| SPAG8_HUMAN (Q99932) Sperm-associated antigen 8 (Sperm membrane protein 1) (SMP-1) (HSD-1) (Sperm membrane protein BS-84) [MASS=44818]                                                                                                                                       | *    | 7.04  | *    | *    | * | 1 | 2 | SRSRSLDIQPSSEGLGPTSEFPSSDDSPR                   | 1 |
|                                                                                                                                                                                                                                                                              |      |       |      |      |   |   |   |                                                 |   |
| SPAST_HUMAN (Q9UBP0) Spastin [MASS=67197]                                                                                                                                                                                                                                    | *    | 3.90  | *    | *    | * | 1 | 3 | PPPPC[330]LAPAPPAAGPAPPESPHK                    | 1 |
| SPG7_HUMAN (Q9UQ90) Paraplegin (EC 3.4.24.-) (Spastic paraplegia protein 7) [MASS=88135]                                                                                                                                                                                     | 0.00 | 11.45 | 2.13 | 0.00 | 1 | 5 | 2 | EGHTSVHTLNFYAVERVLAGTAKK                        | 1 |
|                                                                                                                                                                                                                                                                              |      |       |      |      |   |   | 3 | MC[339]MALGGRASEALSFNEVTSGAQDDL                 | 1 |
|                                                                                                                                                                                                                                                                              |      |       |      |      |   |   | 3 | AYRHTEKVLQDNLDK                                 | 1 |
|                                                                                                                                                                                                                                                                              |      |       |      |      |   |   | 1 | FLQLGAK                                         | 1 |
|                                                                                                                                                                                                                                                                              |      |       |      |      |   |   | 2 | APC[330]IVYIDEIDAVGKKR                          | 2 |
| SPON1_HUMAN (Q9HCB6) Spondin-1 precursor (F-spondin) (Vascular smooth muscle cell growth-promoting factor) [MASS=90973]                                                                                                                                                      | 0.00 | 11.15 | 4.12 | 0.00 | 1 | 4 | 2 | PGTSYRVTLAAPPYFR                                | 1 |
|                                                                                                                                                                                                                                                                              |      |       |      |      |   |   | 3 | EEDHAGTFQIIDEETQFMSNC[339]PVAVTESTPR            | 1 |
|                                                                                                                                                                                                                                                                              |      |       |      |      |   |   | 3 | KLC[330]EQDSTFDGVTDKPILDC[339]C[339]AC[339]GTAK | 1 |
|                                                                                                                                                                                                                                                                              |      |       |      |      |   |   | 2 | M[147]IKM[147]NPADGSM[147]C[339]K               | 1 |
| SPRE2_HUMAN (Q7Z698) Sprouty-related, EVH1 domain-containing protein 2 (Spred-2) [MASS=47498]                                                                                                                                                                                | *    | 6.70  | *    | *    | * | 1 | 3 | AVVMTRDDSSGGWFPEGGGISRVGVC[330]K                | 1 |
| SPT6H_HUMAN (Q7KZ85) Transcription elongation factor SPT6 (hSPT6) (Tat-cotransactivator 2 protein) (Tat-CT2 protein) [MASS=199071]                                                                                                                                           | *    | 1.27  | *    | *    | * | 1 | 3 | TQLVTMC[339]HMGPKVFM[147]NC[330]AGFLK           | 1 |

|                                                                                                                                                                     |      |       |      |      |   |   |   |                                                |   |
|---------------------------------------------------------------------------------------------------------------------------------------------------------------------|------|-------|------|------|---|---|---|------------------------------------------------|---|
| SPTA1_HUMAN (P02549) Spectrin alpha chain, erythrocyte (Erythroid alpha-spectrin) [MASS=279914]                                                                     | *    | 2.94  | *    | *    | * | 4 | 2 | M[147]VEEGHFAAEDVASRVKSLNQNM[147]ESLR          | 1 |
|                                                                                                                                                                     |      |       |      |      |   |   | 2 | TAAINADELPTDVAGGEVLLDR                         | 1 |
|                                                                                                                                                                     |      |       |      |      |   |   | 3 | TKLGDYANLKQFYR                                 | 1 |
|                                                                                                                                                                     |      |       |      |      |   |   | 1 | NLAVMSDK                                       | 1 |
|                                                                                                                                                                     |      |       |      |      |   |   | 1 | EFSMMFK                                        | 1 |
| SPTA2_HUMAN (Q13813) Spectrin alpha chain, brain (Spectrin, non-erythroid alpha chain) (Alpha-II spectrin) (Fodrin alpha chain) [MASS=284537]                       | 0.98 | 5.10  | 0.84 | 0.00 | 1 | 6 | 2 | ALC[339]AEADRLQQSHPLSATQIQVK                   | 1 |
|                                                                                                                                                                     |      |       |      |      |   |   | 2 | MTLVASEDYGDTLAAIQGLLK                          | 1 |
|                                                                                                                                                                     |      |       |      |      |   |   | 3 | EAHDAFRSSLSSAQADFNQLAELDR                      | 1 |
|                                                                                                                                                                     |      |       |      |      |   |   | 3 | LGESQTLQQFSRDVDEIEAWISEK                       | 1 |
|                                                                                                                                                                     |      |       |      |      |   |   | 3 | ALC[330]AEADRLQQSHPLSATQIQVK                   | 1 |
|                                                                                                                                                                     |      |       |      |      |   |   | 2 | FLSDFRDLMSWINGIRGLVSSDELAK                     | 1 |
| SPTB1_HUMAN (P11277) Spectrin beta chain, erythrocyte (Beta-I spectrin) [MASS=246189]                                                                               | 1.00 | 3.23  | 0.89 | 0.19 | 2 | 4 | 3 | TQLVDTADKFRFFSMAR                              | 1 |
|                                                                                                                                                                     |      |       |      |      |   |   | 2 | FFSM[147]ARDLLSWM[147]ESIIRQIETQER             | 1 |
|                                                                                                                                                                     |      |       |      |      |   |   | 2 | M[147]SHLEQC[339]FEELSNM[147]AAGAR             | 1 |
|                                                                                                                                                                     |      |       |      |      |   |   | 2 | IHC[330]LENVDK                                 | 1 |
| SPTB2_HUMAN (Q01082) Spectrin beta chain, brain 1 (Spectrin, non-erythroid beta chain 1) (Beta-II spectrin) (Fodrin beta chain) [MASS=274629]                       | 0.00 | 4.10  | *    | *    | * | 5 | 2 | EKTKVIESTQDLGNDLAGVMALQR                       | 1 |
|                                                                                                                                                                     |      |       |      |      |   |   | 2 | FFSM[147]VRDLMLWM[147]EDVIR                    | 1 |
|                                                                                                                                                                     |      |       |      |      |   |   | 3 | LAEISDVWEEM[147]KTTLK                          | 1 |
|                                                                                                                                                                     |      |       |      |      |   |   | 2 | HEAIETDIAAYEERVQAVAVAR                         | 1 |
|                                                                                                                                                                     |      |       |      |      |   |   | 2 | FATDGEYKPC[330]DPQVIR                          | 1 |
| SPTN2_HUMAN (O15020) Spectrin beta chain, brain 2 (Spectrin, non-erythroid beta chain 2) (Beta-III spectrin) [MASS=271293]                                          | 0.00 | 1.51  | *    | *    | * | 2 | 2 | AQGSVAFDYR                                     | 1 |
|                                                                                                                                                                     |      |       |      |      |   |   | 2 | FLWEVGAEAWVREQQHLLASADTGR                      | 1 |
| SPTN4_HUMAN (Q9H254) Spectrin beta chain, brain 3 (Spectrin, non-erythroid beta chain 3) (Beta-IV spectrin) [MASS=288983]                                           | 0.00 | 4.13  | 0.96 | 0.00 | 1 | 5 | 3 | AWGELEKAEHEREAALR                              | 1 |
|                                                                                                                                                                     |      |       |      |      |   |   | 3 | DC[330]HELDGWIHEKM[147]LMAR                    | 1 |
|                                                                                                                                                                     |      |       |      |      |   |   | 3 | VEALNAAALRFSQLQGYQPC[330]DPQVIC[330]NR         | 1 |
|                                                                                                                                                                     |      |       |      |      |   |   | 2 | MLM[147]ARDGTREDNHK                            | 1 |
|                                                                                                                                                                     |      |       |      |      |   |   | 3 | DALAVYRM[147]FGEVHAC[330]ELWIGEKEQWLLSM[147]R  | 1 |
| SSDH_HUMAN (P51649) Succinate semialdehyde dehydrogenase, mitochondrial precursor (EC 1.2.1.24) (NAD(+)-dependent succinic semialdehyde dehydrogenase) [MASS=57214] | 1.00 | 5.79  | 1.50 | 0.02 | 4 | 1 | 3 | NFFEPTLLC[339]NVTQDMLC[339]THEETFGPLAPVIK      | 2 |
|                                                                                                                                                                     |      |       |      |      |   |   | 3 | NFFEPTLLC[330]NVTQDM[147]LC[330]THEETFGPLAPVIK | 1 |
|                                                                                                                                                                     |      |       |      |      |   |   | 3 | NFFEPTLLC[330]NVTQDMLC[330]THEETFGPLAPVIK      | 1 |
| SSH1_HUMAN (Q8WYL5) Protein phosphatase Slingshot homolog 1 (EC 3.1.3.48) (EC 3.1.3.16) (SSH-1L) (hSSH-1L) [MASS=115510]                                            | 0.00 | 4.39  | 1.61 | 0.00 | 1 | 3 | 2 | GRSGSLLQVEETEREEGLGAGR                         | 1 |
|                                                                                                                                                                     |      |       |      |      |   |   | 2 | RSC[339]PNGM[147]EDDAIFGILNK                   | 1 |
|                                                                                                                                                                     |      |       |      |      |   |   | 1 | DGPASR                                         | 1 |
| ST6B1_HUMAN (Q6IMI4) Sulfotransferase 6B1 (EC 2.8.2.-) [MASS=30511]                                                                                                 | *    | 10.19 | *    | *    | * | 1 | 3 | M[147]C[339]TSETFQALDTFEARHDDIVLASYPK          | 1 |

|                                                                                                                                                                                                        |                  |       |      |      |    |   |   |                                |   |
|--------------------------------------------------------------------------------------------------------------------------------------------------------------------------------------------------------|------------------|-------|------|------|----|---|---|--------------------------------|---|
| STA13_HUMAN (Q9Y3M8) StAR-related lipid transfer protein 13 (StARD13) (START domain-containing protein 13) (46H23.2) (Deleted in liver cancer protein 2) (Rho GTPase-activating protein) [MASS=124967] | *                | 1.89  | *    | *    | *  | 1 | 3 | DLNENLAAAQGLAHMIMEC[330]DR     | 1 |
| STAR8_HUMAN (Q92502) StAR-related lipid transfer protein 8 (StARD8) (START domain-containing protein 8) [MASS=112600]                                                                                  | 0.00             | 4.11  | 2.38 | 0.00 | 1  | 2 | 2 | SPDWYNKVFVGHLC[339]AM[147]EVAK | 1 |
|                                                                                                                                                                                                        |                  |       |      |      |    |   | 3 | SLSIESLC[330]PEDGHLADWQPGR     | 1 |
| STF1_HUMAN (Q13285) Steroidogenic factor 1 (STF-1) (SF-1) (Adrenal 4-binding protein) (Steroid hormone receptor Ad4BP) (Fushi tarazu factor homolog 1) [MASS=51636]                                    | 0.00             | 2.17  | 2.04 | 0.00 | 1  | 1 | 3 | ILGC[339]LQEPTK                | 1 |
| STIM2_HUMAN (Q9P246) Stromal interaction molecule 2 precursor [MASS=83971]                                                                                                                             | 0.00             | 2.68  | 0.16 | 0.00 | 1  | 1 | 3 | MLVLGLLVAGAADGC[330]ELVPR      | 1 |
| STK35_HUMAN (Q8TDR2) Serine/threonine-protein kinase 35 (EC 2.7.11.1) (CLP-36-interacting kinase) (Clik1) (PDLIM1-interacting kinase 1) [MASS=44573]                                                   | 0.00             | 14.71 | 0.20 | 0.00 | 1  | 3 | 3 | IRC[330]DAPENVELALAEFWALTSKLR  | 1 |
|                                                                                                                                                                                                        |                  |       |      |      |    |   | 2 | VADFGLSKVC[339]AGLAPR          | 1 |
|                                                                                                                                                                                                        |                  |       |      |      |    |   | 2 | DM[147]LAANPQDRPDFAFELETR      | 1 |
| STON2_HUMAN (Q8WXE9) Stonin-2 (Stoned B) [MASS=101164]                                                                                                                                                 | 0.00             | 3.65  | 0.29 | 0.00 | 1  | 2 | 3 | STLMNFSKVQKLDISSLNR            | 1 |
|                                                                                                                                                                                                        |                  |       |      |      |    |   | 2 | FHGC[330]VDEDVFHNSR            | 1 |
|                                                                                                                                                                                                        |                  |       |      |      |    |   | 2 | YSTHLHLAEDC[330]M[147]K        | 2 |
|                                                                                                                                                                                                        |                  |       |      |      |    |   | 3 | YSTHLHLAEDC[330]M[147]K        | 1 |
|                                                                                                                                                                                                        |                  |       |      |      |    |   | 2 | LAEQIATLC[330]ATLK             | 1 |
|                                                                                                                                                                                                        |                  |       |      |      |    |   | 2 | YSTHLHLAEDC[330]MK             | 2 |
| STXB1_HUMAN (P61764) Syntaxin-binding protein 1 (Unc-18 homolog) (Unc-18A) (Unc-18-1) (N-Sec1) (p67) [MASS=67568]                                                                                      | 1.00             | 10.77 | 0.66 | 0.18 | 16 | 5 | 2 | M[147]LSSC[330]C[330]K         | 1 |
|                                                                                                                                                                                                        |                  |       |      |      |    |   | 2 | YSTHLHLAEDC[339]M[147]K        | 1 |
|                                                                                                                                                                                                        |                  |       |      |      |    |   | 2 | HYQGTVDKLC[330]R               | 2 |
|                                                                                                                                                                                                        |                  |       |      |      |    |   | 2 | AAHVFFTDSC[330]PDALFNELVK      | 1 |
|                                                                                                                                                                                                        |                  |       |      |      |    |   | 2 | M[147]LSSC[339]C[339]K         | 1 |
|                                                                                                                                                                                                        |                  |       |      |      |    |   | 1 | LAEQIATLC[330]ATLK             | 2 |
| 2                                                                                                                                                                                                      | HYQGTVDKLC[339]R | 2     |      |      |    |   |   |                                |   |

|                                                                                                                                                                                                                                                 |      |       |      |      |   |   |   |                                               |   |
|-------------------------------------------------------------------------------------------------------------------------------------------------------------------------------------------------------------------------------------------------|------|-------|------|------|---|---|---|-----------------------------------------------|---|
| SUCA_HUMAN (P53597) Succinyl-CoA ligase [GDP-forming] alpha-chain, mitochondrial precursor (EC 6.2.1.4) (Succinyl-CoA synthetase, alpha chain) (SCS-alpha) [MASS=35047]                                                                         | 1.00 | 11.11 | 1.16 | 0.06 | 3 | 2 | 3 | IIC[339]QGFTGK                                | 2 |
|                                                                                                                                                                                                                                                 |      |       |      |      |   |   | 2 | TRLIGPNC[339]PGVINPGECC[339]KIGIM[147]PGHIHK  | 1 |
|                                                                                                                                                                                                                                                 |      |       |      |      |   |   | 2 | IIC[330]QGFTGK                                | 1 |
|                                                                                                                                                                                                                                                 |      |       |      |      |   |   | 2 | IIC[339]QGFTGK                                | 1 |
| SUCB1_HUMAN (Q9P2R7) Succinyl-CoA ligase [ADP-forming] beta-chain, mitochondrial precursor (EC 6.2.1.5) (Succinyl-CoA synthetase, betaA chain) (SCS-betaA) (ATP-specific succinyl-CoA synthetase subunit beta) (NY-REN-39 antigen) [MASS=50317] | 1.00 | 2.16  | 1.57 | 0.03 | 2 | 1 | 2 | IC[330]NQVLVC[330]ER                          | 1 |
|                                                                                                                                                                                                                                                 |      |       |      |      |   |   | 2 | IC[339]NQVLVC[339]ER                          | 1 |
| SUFU_HUMAN (Q9UMX1) Suppressor of fused homolog (SUFUH) [MASS=53946]                                                                                                                                                                            | 0.00 | 6.61  | 0.83 | 0.00 | 1 | 1 | 3 | GIETDGSNLSGVSAKC[330]AWDDLSPPEDEDSR           | 1 |
| SULF1_HUMAN (Q8IWU6) Extracellular sulfatase Sulf-1 precursor (EC 3.1.6.-) (HSulf-1) [MASS=101026]                                                                                                                                              | 0.00 | 6.08  | 2.19 | 0.00 | 1 | 3 | 2 | KRLQTLM[147]SVDDSVR                           | 1 |
|                                                                                                                                                                                                                                                 |      |       |      |      |   |   | 2 | TRKIM[147]EHGGATFINAFVTPM[147]C[339]C[330]PSR | 1 |
|                                                                                                                                                                                                                                                 |      |       |      |      |   |   | 2 | GFHDKDKEC[339]SC[339]R                        | 1 |
| SURF4_HUMAN (O15260) Surfeit locus protein 4 [MASS=30394]                                                                                                                                                                                       | *    | 4.83  | *    | *    | * | 1 | 2 | ESSPKQYM[147]QLGGR                            | 1 |
| SUZ12_HUMAN (Q15022) Polycomb protein SUZ12 (Suppressor of zeste 12 protein homolog) (Joined to JAZF1 protein) (Chromatin precipitated E2F target 9 protein) (ChET 9 protein) [MASS=83053]                                                      | *    | 4.33  | *    | *    | * | 2 | 2 | NLIAPIFLHRTLTYMSHRNSR                         | 1 |
|                                                                                                                                                                                                                                                 |      |       |      |      |   |   | 3 | RTPITHILVC[339]R                              | 1 |
|                                                                                                                                                                                                                                                 |      |       |      |      |   |   | 3 | SAFLASANAC[339]RR                             | 1 |
|                                                                                                                                                                                                                                                 |      |       |      |      |   |   | 3 | VQASKNPLKM[147]LAAR                           | 5 |
| SVIL_HUMAN (O95425) Supervillin (Archvillin) (p205/p250) [MASS=247705]                                                                                                                                                                          | *    | 1.17  | *    | *    | * | 2 |   |                                               |   |
| SYEP_HUMAN (P07814) Bifunctional aminoacyl-tRNA synthetase [Includes: Glutamyl-tRNA synthetase (EC 6.1.1.17) (Glutamate--tRNA ligase); Prolyl-tRNA synthetase (EC 6.1.1.15) (Proline--tRNA ligase)] [MASS=163025]                               | 0.99 | 2.78  | 1.68 | 0.00 | 1 | 2 | 3 | YNVYPTYDFAC[330]PIVDSIEGVTHALR                | 1 |
|                                                                                                                                                                                                                                                 |      |       |      |      |   |   | 3 | HEELMLGDPC[339]LKDLK                          | 1 |
| SYFB_HUMAN (Q9NSD9) Phenylalanyl-tRNA synthetase beta chain (EC 6.1.1.20) (Phenylalanine--tRNA ligase beta chain) (PheRS) [MASS=66129]                                                                                                          | 0.95 | 1.19  | 1.19 | 0.05 | 2 | 1 | 2 | LHQNIC[339]R                                  | 2 |

|                                                                                                                                                                                                   |      |      |      |      |   |    |   |                                        |   |
|---------------------------------------------------------------------------------------------------------------------------------------------------------------------------------------------------|------|------|------|------|---|----|---|----------------------------------------|---|
| SYGP1_HUMAN (Q96PV0) Ras GTPase-activating protein SynGAP (Synaptic Ras-GTPase-activating protein 1) (Synaptic Ras-GAP 1) (Neuronal RasGAP) [MASS=146675]                                         | 0.99 | 4.07 | 0.83 | 0.00 | 1 | 3  | 2 | PSSGNLLQSPEPSYGP                       | 1 |
|                                                                                                                                                                                                   |      |      |      |      |   |    | 2 | VVNSHC[330]VFPR                        | 1 |
|                                                                                                                                                                                                   |      |      |      |      |   |    | 2 | GPSAEMQGYMMRDLNSSIDLQSFMAR             | 1 |
| SYHH_HUMAN (P49590) Histidyl-tRNA synthetase homolog (EC 6.1.1.21) (Histidine--tRNA ligase homolog) (HisRS) [MASS=56888]                                                                          | 0.00 | 4.74 | 5.81 | 0.00 | 1 | 2  | 2 | ILDLVISC[339]FKR                       | 1 |
|                                                                                                                                                                                                   |      |      |      |      |   |    | 3 | EKILDLVISC[330]FKR                     | 1 |
| SYIC_HUMAN (P41252) Isoleucyl-tRNA synthetase, cytoplasmic (EC 6.1.1.5) (Isoleucine--tRNA ligase) (IleRS) (IRS) [MASS=144958]                                                                     | *    | 2.21 | *    | *    | * | 2  | 2 | LYLINSPPVRAENLR                        | 1 |
|                                                                                                                                                                                                   |      |      |      |      |   |    | 1 | LKGAFKAVM[147]TSIK                     | 1 |
| SYIM_HUMAN (Q9NSE4) Isoleucyl-tRNA synthetase, mitochondrial precursor (EC 6.1.1.5) (Isoleucine--tRNA ligase) (IleRS) [MASS=113791]                                                               | 0.00 | 3.75 | 3.31 | 0.00 | 1 | 2  | 3 | C[330]WKYTAESSDTLC[339]PRC[339]AEVVSGK | 1 |
|                                                                                                                                                                                                   |      |      |      |      |   |    | 2 | SC[339]QTALVEILDVIVR                   | 1 |
|                                                                                                                                                                                                   |      |      |      |      |   |    | 3 | PVATSNIQELQAQISR                       | 1 |
|                                                                                                                                                                                                   |      |      |      |      |   |    | 3 | LEDTLEEDIKTM[147]EM[147]VK             | 1 |
|                                                                                                                                                                                                   |      |      |      |      |   |    | 2 | KLSQSLPDHHEELHAEQM[147]R               | 1 |
|                                                                                                                                                                                                   |      |      |      |      |   |    | 3 | ELC[339]EWLTQM[147]ESKVSQNGDILIEEMIEK  | 1 |
|                                                                                                                                                                                                   |      |      |      |      |   |    | 3 | ELYEKTEDESFKDTAQEELK                   | 1 |
|                                                                                                                                                                                                   |      |      |      |      |   |    | 3 | TRSVNGIPVPPDQLEDM[147]AER              | 1 |
|                                                                                                                                                                                                   |      |      |      |      |   |    | 3 | SQYERALQDLADLLETGQEKMAGDQK             | 1 |
| SYNE1_HUMAN (Q8NF91) Nesprin-1 (Nuclear envelope spectrin repeat protein 1) (Synaptic nuclear envelope protein 1) (Syne-1) (Myocyte nuclear envelope protein 1) (Myne-1) (Enaptin) [MASS=1011035] | 0.00 | 4.58 | 0.24 | 1.23 | 2 | 20 | 2 | QM[147]TSFYDSLKINEIITVLER              | 1 |
|                                                                                                                                                                                                   |      |      |      |      |   |    | 2 | LLDPEDVDVDPDEKSIM[147]TYVAQFLK         | 1 |
|                                                                                                                                                                                                   |      |      |      |      |   |    | 2 | QNVHAHLQGTKDSYSAIC[339]STAQR           | 1 |
|                                                                                                                                                                                                   |      |      |      |      |   |    | 3 | VKDHDYNSQLQVEKWLQ[147]SGR              | 1 |
|                                                                                                                                                                                                   |      |      |      |      |   |    | 2 | SADSLSPQPSSNLSLSLAQPLR                 | 1 |
|                                                                                                                                                                                                   |      |      |      |      |   |    | 2 | QASVNTIIEK                             | 1 |
|                                                                                                                                                                                                   |      |      |      |      |   |    | 2 | FVLLDHLQSLSEAEDHTRALHR                 | 1 |
|                                                                                                                                                                                                   |      |      |      |      |   |    | 2 | QALQDC[330]ASELGSFEDQHR                | 1 |
|                                                                                                                                                                                                   |      |      |      |      |   |    | 2 | HSELELNIAQNMVSQVK                      | 1 |
|                                                                                                                                                                                                   |      |      |      |      |   |    | 2 | GLGTVKDSLFFLHELGEQLK                   | 1 |
|                                                                                                                                                                                                   |      |      |      |      |   |    | 2 | ALHDKQLNMQGTAEK                        | 1 |
|                                                                                                                                                                                                   |      |      |      |      |   |    | 3 | AIILSINLC[330]SPEFTQADSKESR            | 1 |
|                                                                                                                                                                                                   |      |      |      |      |   |    | 3 | GEAKASSPEM[147]DISADR                  | 1 |
| SYNPR_HUMAN (Q8TBG9) Synaptoporin [MASS=29166]                                                                                                                                                    | 0.95 | 5.28 | 0.76 | 0.00 | 1 | 1  | 2 | LHQVTFEVPTC[330]EGK                    | 1 |
| SYP2L_HUMAN (Q9H987) Synaptopodin 2-like protein [MASS=102468]                                                                                                                                    | 0.00 | 4.50 | 0.70 | 0.00 | 1 | 2  | 3 | TKC[339]RTIASLLTAAPNPHSK               | 1 |
|                                                                                                                                                                                                   |      |      |      |      |   |    | 2 | TAM[147]FC[339]FDEVPPTPGPIASGSPKTAR    | 1 |

|                                                                                                                                                       |      |       |      |      |    |   |   |                                           |   |
|-------------------------------------------------------------------------------------------------------------------------------------------------------|------|-------|------|------|----|---|---|-------------------------------------------|---|
| SYPH_HUMAN (P08247) Synaptophysin<br>(Major synaptic vesicle protein p38)<br>[MASS=33845]                                                             | 1.00 | 5.75  | 0.54 | 0.14 | 4  | 2 | 1 | LHQVYFDAPTC[330]R                         | 1 |
|                                                                                                                                                       |      |       |      |      |    |   | 2 | LHQVYFDAPTC[339]R                         | 1 |
|                                                                                                                                                       |      |       |      |      |    |   | 2 | EM[147]PVC[339]R                          | 2 |
|                                                                                                                                                       |      |       |      |      |    |   | 2 | EM[147]PVC[330]R                          | 1 |
| SYQ_HUMAN (P47897) Glutaminyl-tRNA<br>synthetase (EC 6.1.1.18) (Glutamine--tRNA<br>ligase) (GlnRS) [MASS=87798]                                       | *    | 3.23  | *    | *    | *  | 1 | 3 | VIIITNFPAAKSLDIQVPNFPADETK                | 1 |
|                                                                                                                                                       |      |       |      |      |    |   | 2 | M[147]GSQHSAAARPSSC[330]RR                | 1 |
| T106C_HUMAN (Q9BVX2) Transmembrane<br>protein 106C (Endoplasmic reticulum<br>membrane protein overexpressed in cancer)<br>[MASS=27875]                | 0.00 | 6.40  | 0.48 | 0.00 | 1  | 1 | 2 | M[147]GSQHSAAARPSSC[330]RR                | 1 |
| TAU_HUMAN (P10636) Microtubule-<br>associated protein tau (Neurofibrillary tangle<br>protein) (Paired helical filament-tau) (PHF-tau)<br>[MASS=78746] | *    | 1.85  | *    | *    | *  | 1 | 3 | TPSSGEPKSGDR                              | 1 |
|                                                                                                                                                       |      |       |      |      |    |   | 2 | SIQFVDWC[330]PTGFK                        | 1 |
|                                                                                                                                                       |      |       |      |      |    |   | 2 | YMAC[339]C[339]LLYR                       | 1 |
|                                                                                                                                                       |      |       |      |      |    |   | 2 | AYHEQLSVAEITNAC[330]FEPANQM[147]VK        | 1 |
| TBA1_HUMAN (P68366) Tubulin alpha-1 chain<br>(Alpha-tubulin 1) (Testis-specific alpha-tubulin)<br>(Tubulin H2-alpha) [MASS=49924]                     | 1.00 | 20.54 | 0.91 | 0.07 | 10 | 5 | 3 | LSDQC[330]TGLQGFLVFHSGGGTSGGFTSLLMER      | 2 |
|                                                                                                                                                       |      |       |      |      |    |   | 2 | LISQIVSSITASLR                            | 1 |
|                                                                                                                                                       |      |       |      |      |    |   | 2 | YMAC[330]C[330]LLYR                       | 1 |
|                                                                                                                                                       |      |       |      |      |    |   | 2 | AYHEQLSVAEITNAC[330]FEPANQMVK             | 1 |
|                                                                                                                                                       |      |       |      |      |    |   | 2 | YM[147]AC[330]C[330]LLYR                  | 2 |
| TBA2_HUMAN (Q13748) Tubulin alpha-2 chain<br>(Alpha-tubulin 2) [MASS=49959]                                                                           | 0.00 | 13.56 | *    | *    | *  | 3 | 2 | AYHEQLSVAEITNAC[339]FEPANQM[147]VK        | 1 |
|                                                                                                                                                       |      |       |      |      |    |   | 3 | LSDQC[330]TGLQGFLVFHSGGGTSGGFTSLLM[147]ER | 1 |
|                                                                                                                                                       |      |       |      |      |    |   | 3 | LSDQC[339]TGLQGFLVFHSGGGTSGGFTSLLMER      | 1 |
|                                                                                                                                                       |      |       |      |      |    |   | 3 | LSDQC[339]TGLQGFLVFHSGGGTSGGFTSLLM[147]ER | 2 |
| TBA2_HUMAN (Q13748) Tubulin alpha-2 chain<br>(Alpha-tubulin 2) [MASS=49959]                                                                           | 0.00 | 13.56 | *    | *    | *  | 3 | 3 | C[339]DPRHGKYM[330]C[339]MLYR             | 1 |
|                                                                                                                                                       |      |       |      |      |    |   | 2 | TIQFVDWC[339]PTGFK                        | 1 |
|                                                                                                                                                       |      |       |      |      |    |   | 3 | LADLC[330]TGLQGFLVFHSGGGTSGGFASLLM[147]ER | 1 |

|                                                                                              |      |      |      |      |    |   |   |                                             |   |
|----------------------------------------------------------------------------------------------|------|------|------|------|----|---|---|---------------------------------------------|---|
|                                                                                              |      |      |      |      |    |   | 3 | LADQC[330]TGLQGFLVFHSFGGGTGSFGFTSLLMER      | 2 |
|                                                                                              |      |      |      |      |    |   | 3 | LADQC[339]TGLQGFLVFHSFGGGTGSFGFTSLLM[147]ER | 3 |
| TBA3_HUMAN (Q71U36) Tubulin alpha-3 chain (Alpha-tubulin 3) (Tubulin B-alpha-1) [MASS=50135] | 0.00 | 7.10 | *    | *    | *  | 1 | 2 | LADQC[330]TGLQGFLVFHSFGGGTGSFGFTSLLM[147]ER | 1 |
|                                                                                              |      |      |      |      |    |   | 2 | LADQC[339]TGLQGFLVFHSFGGGTGSFGFTSLLM[147]ER | 1 |
|                                                                                              |      |      |      |      |    |   | 3 | LADQC[339]TGLQGFLVFHSFGGGTGSFGFTSLLMER      | 2 |
|                                                                                              |      |      |      |      |    |   | 3 | LADQC[330]TGLQGFLVFHSFGGGTGSFGFTSLLM[147]ER | 3 |
| TBA6_HUMAN (Q9BQE3) Tubulin alpha-6 chain (Alpha-tubulin 6) [MASS=49895]                     | 1.00 | 5.35 | 0.87 | 0.08 | 13 | 1 | 3 | AYHEQLTVAEITNAC[339]FEPANQM[147]VK          | 1 |
| TBA8_HUMAN                                                                                   | 0.00 | 4.01 | *    | *    | *  | 1 | 3 | GDVVPKDVNVAIAAIKTK                          | 1 |
| TBB1_HUMAN (Q9H4B7) Tubulin beta-1 chain [MASS=50327]                                        | *    | 1.33 | *    | *    | *  | 1 | 2 | EEYPDR                                      | 1 |



TBB2C\_HUMAN (P68371) Tubulin beta-2C  
chain (Tubulin beta-2 chain) [MASS=49831]

1.00 26.97 \* \* \* 6

|   |                                                 |   |
|---|-------------------------------------------------|---|
| 3 | LTTPTYGDLNHLVSATM[147]SGVTTC[330]LR             | 3 |
| 2 | NM[147]MAAC[330]DPR                             | 1 |
| 2 | NM[147]M[147]AAC[330]DPRHGR                     | 1 |
| 3 | EAESC[339]DC[339]LQGFQLTHSLGGGTGSGMGTLLISK      | 2 |
| 2 | LTTPTYGDLNHLVSATMSGVTTC[330]LR                  | 2 |
| 2 | NM[147]M[147]AAC[339]DPRHGR                     | 1 |
| 2 | NM[147]MAAC[339]DPR                             | 1 |
| 3 | KEAESC[339]DC[339]LQGFQLTHSLGGGTGSGMGTLLISK     | 1 |
| 2 | LTTPTYGDLNHLVSATM[147]SGVTTC[339]LR             | 2 |
| 2 | NMM[147]AAC[330]DPR                             | 1 |
| 1 | TAVC[330]DIPPR                                  | 2 |
| 2 | LTTPTYGDLNHLVSATM[147]SGVTTC[330]LR             | 4 |
| 2 | NM[147]M[147]AAC[330]DPR                        | 4 |
| 3 | LTTPTYGDLNHLVSATMSGVTTC[339]LR                  | 1 |
| 3 | EAESC[330]DC[330]LQGFQLTHSLGGGTGSGM[147]GTLLISK | 1 |

|                                                                                |      |       |      |      |    |  |   |   |                                                  |   |
|--------------------------------------------------------------------------------|------|-------|------|------|----|--|---|---|--------------------------------------------------|---|
|                                                                                |      |       |      |      |    |  |   | 2 | TAVC[330]DIPPR                                   | 4 |
|                                                                                |      |       |      |      |    |  |   | 3 | LTPTYGDLNHLVSATM[147]SGVTTC[339]LR               | 4 |
|                                                                                |      |       |      |      |    |  |   | 2 | TAVC[339]DIPPR                                   | 3 |
| TBB2C_HUMAN (P68371) Tubulin beta-2C chain (Tubulin beta-2 chain) [MASS=49831] | 1.00 | 26.97 | *    | *    | *  |  | 6 | 2 | NM[147]M[147]AAC[339]DPR                         | 5 |
|                                                                                |      |       |      |      |    |  |   | 1 | TAVC[339]DIPPR                                   | 1 |
|                                                                                |      |       |      |      |    |  |   | 3 | EAESC[339]DC[339]LQGFQLTHSLGGGTGSGM[147]GTLLISK  | 5 |
|                                                                                |      |       |      |      |    |  |   | 3 | KEAESC[330]DC[330]LQGFQLTHSLGGGTGSGM[147]GTLLISK | 1 |
|                                                                                |      |       |      |      |    |  |   | 3 | KEAESC[339]DC[339]LQGFQLTHSLGGGTGSGM[147]GTLLISK | 2 |
|                                                                                |      |       |      |      |    |  |   | 2 | EIVHIQAGQC[339]GNQIGAK                           | 4 |
|                                                                                |      |       |      |      |    |  |   | 2 | EIVHIQAGQC[330]GNQIGAK                           | 3 |
| TBB2_HUMAN (P07437) Tubulin beta-2 chain [MASS=49671]                          | 1.00 | 12.39 | 0.80 | 0.55 | 46 |  | 3 | 2 | M[147]REIVHIQAGQC[339]GNQIGAK                    | 2 |
|                                                                                |      |       |      |      |    |  |   | 3 | EIVHIQAGQC[339]GNQIGAK                           | 1 |
|                                                                                |      |       |      |      |    |  |   | 3 | M[147]REIVHIQAGQC[339]GNQIGAK                    | 1 |
|                                                                                |      |       |      |      |    |  |   | 1 | EIVHIQAGQC[330]GNQIGAK                           | 1 |
|                                                                                |      |       |      |      |    |  |   | 2 | YVPRAILVDLEPGTMDSVR                              | 1 |
|                                                                                |      |       |      |      |    |  |   | 2 | M[147]REIVHIQAGQC[330]GNQIGAK                    | 1 |
|                                                                                |      |       |      |      |    |  |   | 3 | EIVHIQAGQC[330]GNQIGAK                           | 2 |
| TBB4_HUMAN                                                                     | 1.00 | 4.05  | *    | *    | *  |  | 1 | 2 | GRMSM[147]KEVDEQMLSVQSK                          | 1 |

|                                                                                                                                                                                                                   |      |       |      |      |   |   |   |                                               |   |
|-------------------------------------------------------------------------------------------------------------------------------------------------------------------------------------------------------------------|------|-------|------|------|---|---|---|-----------------------------------------------|---|
| TBB6_HUMAN (Q9BUF5) Tubulin beta-6 chain [MASS=49857]                                                                                                                                                             | 1.00 | 17.04 | 0.63 | 0.00 | 1 | 4 | 2 | EIVHIQAGQC[330]GNQIGTK                        | 1 |
|                                                                                                                                                                                                                   |      |       |      |      |   |   | 2 | IMNTFSVM[147]PSPK                             | 1 |
|                                                                                                                                                                                                                   |      |       |      |      |   |   | 3 | GLKMASTFIGNSTAIQELFK                          | 1 |
|                                                                                                                                                                                                                   |      |       |      |      |   |   | 3 | YLTVATVFRGPMMSMKEVDEQM[147]LAIQSK             | 1 |
| TBCD1_HUMAN (Q86TI0) TBC1 domain family member 1 [MASS=133083]                                                                                                                                                    | *    | 1.03  | *    | *    | * | 1 | 2 | MLKFLM[147]FDMGLR                             | 1 |
| TBCD5_HUMAN (Q92609) TBC1 domain family member 5 [MASS=89004]                                                                                                                                                     | 0.00 | 3.14  | 1.67 | 0.00 | 1 | 1 | 3 | M[147]LKFLM[147]FDM[147]GLR                   | 1 |
|                                                                                                                                                                                                                   |      |       |      |      |   |   | 2 | ESEEELEAQISFLQGQLNDLDAMC[339]K                | 1 |
|                                                                                                                                                                                                                   |      |       |      |      |   |   | 2 | EGM[147]RGRSPSQYHDFAEK                        | 1 |
| TCF20_HUMAN (Q9UGU0) Transcription factor 20 (Stromelysin 1 PDGF-responsive element-binding protein) (SPRE-binding protein) (Nuclear factor SPBP) (AR1) [MASS=211770]                                             | *    | 7.70  | *    | *    | * | 8 | 1 | LEAIVQKITSPNIRR                               | 1 |
|                                                                                                                                                                                                                   |      |       |      |      |   |   | 2 | VGGREGM[147]R                                 | 1 |
|                                                                                                                                                                                                                   |      |       |      |      |   |   | 2 | KQQQPPPPPPQPPQIPEGSADGEPK                     | 1 |
|                                                                                                                                                                                                                   |      |       |      |      |   |   | 2 | IGRNDRLNPTLSQSVILPGGLVSMETK                   | 1 |
|                                                                                                                                                                                                                   |      |       |      |      |   |   | 2 | C[339]LMSSDGLPNKGMELKHGSQK                    | 1 |
|                                                                                                                                                                                                                   |      |       |      |      |   |   | 2 | PTPMRRVPGR                                    | 1 |
|                                                                                                                                                                                                                   |      |       |      |      |   |   | 2 | QMYQQQPEEYKDWSSGSAQGVIAAAQHR                  | 1 |
| TDG_HUMAN (Q13569) G/T mismatch-specific thymine DNA glycosylase (EC 3.2.2.-) [MASS=46053]                                                                                                                        | 0.20 | 7.32  | 0.66 | 0.00 | 1 | 2 | 1 | EFREGGR                                       | 1 |
|                                                                                                                                                                                                                   |      |       |      |      |   |   | 2 | C[330]LFMSGLSEVQLNHMDDHTLPGK                  | 1 |
| TDRD5_HUMAN (Q8NAT2) Tudor domain-containing protein 5 [MASS=76592]                                                                                                                                               | 0.00 | 4.99  | 1.08 | 0.00 | 1 | 1 | 3 | QIQLSTAAPC[339]STTAVDDSAEKPSGVSPEILK          | 1 |
| TE2IP_HUMAN (Q9NYB0) Telomeric repeat-binding factor 2-interacting protein 1 (TRF2-interacting telomeric protein Rap1) (hRap1) [MASS=44260]                                                                       | 0.00 | 7.27  | *    | *    | * | 1 | 2 | LGPASAADTGSEAKPGALAEAAEPEPQR                  | 1 |
| TEBP_HUMAN (Q15185) Prostaglandin E synthase 3 (EC 5.3.99.3) (Cytosolic prostaglandin E2 synthase) (cPGES) (Telomerase-binding protein p23) (Hsp90 co-chaperone) (Progesterone receptor complex p23) [MASS=18697] | 0.85 | 18.75 | 1.03 | 0.05 | 2 | 2 | 2 | HLNEIDLFHC[330]IDPNDSK                        | 1 |
|                                                                                                                                                                                                                   |      |       |      |      |   |   | 2 | LTFSC[339]LGGSDNFK                            | 1 |
| TENX_HUMAN (P22105) Tenascin-X precursor (TN-X) (Hexabrachion-like protein) [MASS=464454]                                                                                                                         | *    | 2.59  | *    | *    | * | 5 | 3 | C[330]EGGRC[339]VC[339]DPGYTGDDC[330]GM[147]R | 1 |
|                                                                                                                                                                                                                   |      |       |      |      |   |   | 3 | C[330]VC[330]EDGYSGEDC[330]GVR                | 1 |
|                                                                                                                                                                                                                   |      |       |      |      |   |   | 3 | MNMYGLHDGQRM[147]GPLSVVIVTAPATEASK            | 1 |
|                                                                                                                                                                                                                   |      |       |      |      |   |   | 3 | GRC[339]EGGRC[330]VC[339]DPGYTGDDC[330]GMR    | 1 |
|                                                                                                                                                                                                                   |      |       |      |      |   |   | 3 | LSWTVAQGPFDSEFVVQYRDTDGQPR                    | 1 |

|                                                                                                                                                                                                             |      |       |      |      |   |   |   |                                                       |   |
|-------------------------------------------------------------------------------------------------------------------------------------------------------------------------------------------------------------|------|-------|------|------|---|---|---|-------------------------------------------------------|---|
|                                                                                                                                                                                                             |      |       |      |      |   |   | 2 | LPFMAMLRNLC[330]NLLR                                  | 1 |
|                                                                                                                                                                                                             |      |       |      |      |   |   | 3 | PAQHVQALLGYRYPNLQLFSRSR                               | 1 |
|                                                                                                                                                                                                             |      |       |      |      |   |   | 1 | SVIHSR                                                | 1 |
|                                                                                                                                                                                                             |      |       |      |      |   |   | 3 | YPSNLQLFSRSR                                          | 1 |
|                                                                                                                                                                                                             |      |       |      |      |   |   | 1 | VGISSR                                                | 7 |
| TEP1_HUMAN (Q99973) Telomerase protein component 1 (Telomerase-associated protein 1) (Telomerase protein 1) (p240) (p80 telomerase homolog) [MASS=290413]                                                   | *    | 4.19  | *    | *    | * | 7 |   |                                                       |   |
|                                                                                                                                                                                                             |      |       |      |      |   |   | 3 | TLAFNVPGGVVAVGRLDISM[147]VELWAWREGAR                  | 1 |
|                                                                                                                                                                                                             |      |       |      |      |   |   | 3 | SIRLFISSTFRDM[147]HGER                                | 1 |
| TERA_HUMAN (P55072) Transitional endoplasmic reticulum ATPase (TER ATPase) (15S Mg(2+)-ATPase p97 subunit) (Valosin-containing protein) (VCP) [MASS=89190]                                                  | 0.97 | 7.70  | 0.53 | 0.00 | 1 | 3 | 2 | QAAPC[330]VLFFDELDSIAK                                | 1 |
|                                                                                                                                                                                                             |      |       |      |      |   |   | 3 | EDEEESLNEVGYDDIGGC[339]R                              | 1 |
|                                                                                                                                                                                                             |      |       |      |      |   |   | 3 | PDIIDPAILRPGRLDQLIYIPLPDEK                            | 1 |
| TF3A_HUMAN (Q92664) Transcription factor IIIA (Factor A) (TFIIIA) [MASS=46848]                                                                                                                              | 0.00 | 8.04  | 2.15 | 0.00 | 1 | 2 | 2 | QQQGLSLC[339]QNGESPNC[339]VEDK                        | 1 |
|                                                                                                                                                                                                             |      |       |      |      |   |   | 2 | RSLASHLSGYIPPK                                        | 1 |
| TF3C1_HUMAN (Q12789) General transcription factor 3C polypeptide 1 (Transcription factor IIIC-subunit alpha) (TF3C-alpha) (TFIIIC 220 kDa subunit) (TFIIIC220) (TFIIIC box B-binding subunit) [MASS=238294] | 0.00 | 2.04  | 0.82 | 0.00 | 1 | 3 | 2 | SKYDILM[147]EKLSVMLSTR                                | 1 |
|                                                                                                                                                                                                             |      |       |      |      |   |   | 1 | NYHPIVVPGGLGR                                         | 1 |
|                                                                                                                                                                                                             |      |       |      |      |   |   | 2 | YISC[330]VFAEESDLSR                                   | 1 |
| TGBR3_HUMAN (Q03167) TGF-beta receptor type III precursor (TGFR-3) (Transforming growth factor beta receptor III) (Betaglycan) [MASS=93428]                                                                 | *    | 6.35  | *    | *    | * | 2 | 3 | PVFNTSLLFLQC[339]ELTLC[330]TKM[147]EKHPQK             | 1 |
|                                                                                                                                                                                                             |      |       |      |      |   |   | 3 | C[330]VPPDEAC[330]TSLDASIIWAMM[147]QNKKTFTK           | 1 |
| TGT_HUMAN (Q9BXR0) Queuine tRNA-ribosyltransferase (EC 2.4.2.29) (tRNA-guanine transglycosylase) (Guanine insertion enzyme) [MASS=42492]                                                                    | 0.00 | 10.08 | 5.12 | 0.00 | 1 | 2 | 3 | GITTEQLDALGC[339]R                                    | 1 |
|                                                                                                                                                                                                             |      |       |      |      |   |   | 2 | AGELWLPHGTVATPVFM[147]PVGQTQATM[147]K                 | 1 |
| THA_HUMAN (P10827) Thyroid hormone receptor alpha (C-erbA-alpha) (c-erbA-1) (EAR-7) (EAR7) [MASS=54815]                                                                                                     | *    | 8.57  | *    | *    | * | 2 | 3 | IITPAITRVVDFAK                                        | 1 |
|                                                                                                                                                                                                             |      |       |      |      |   |   | 3 | KLPMFSELPC[339]EDQIILLKGC[339]C[339]M[147]EIM[147]SLR | 1 |

|                                                                                                                                                                                     |      |       |      |      |   |   |   |                                                   |   |
|-------------------------------------------------------------------------------------------------------------------------------------------------------------------------------------|------|-------|------|------|---|---|---|---------------------------------------------------|---|
| THIK_HUMAN (P09110) 3-ketoacyl-CoA thiolase, peroxisomal precursor (EC 2.3.1.16) (Beta-ketothiolase) (Acetyl-CoA acyltransferase) (Peroxisomal 3-oxoacyl-CoA thiolase) [MASS=44292] | *    | 4.48  | *    | *    | * | 1 | 3 | IAQFLSDIPETVPLSTVNR                               | 1 |
|                                                                                                                                                                                     |      |       |      |      |   |   | 2 | IHMGSC[339]AENTAK                                 | 1 |
|                                                                                                                                                                                     |      |       |      |      |   |   | 2 | IHM[147]GSC[339]AENTAK                            | 3 |
| THIL_HUMAN (P24752) Acetyl-CoA acetyltransferase, mitochondrial precursor (EC 2.3.1.9) (Acetoacetyl-CoA thiolase) (T2) [MASS=45199]                                                 | 1.00 | 2.81  | 1.64 | 0.08 | 6 | 1 |   |                                                   |   |
|                                                                                                                                                                                     |      |       |      |      |   |   | 2 | IHM[147]GSC[330]AENTAK                            | 2 |
| THIM_HUMAN (P42765) 3-ketoacyl-CoA thiolase, mitochondrial (EC 2.3.1.16) (Beta-ketothiolase) (Acetyl-CoA acyltransferase) (Mitochondrial 3-oxoacyl-CoA thiolase) (T1) [MASS=41924]  | *    | 4.03  | *    | *    | * | 1 | 3 | PQTTLEQLKQLPPVFK                                  | 1 |
| THNSL_HUMAN (Q8IYQ7) Threonine synthase-like 1 [MASS=83070]                                                                                                                         | 0.84 | 2.29  | 0.66 | 0.00 | 1 | 1 | 2 | NGIIVYLDVPLLDLIC[330]JR                           | 1 |
| THY1_HUMAN (P04216) Thy-1 membrane glycoprotein precursor (Thy-1 antigen) (CD90 antigen) (CDw90 antigen) [MASS=17935]                                                               | 1.00 | 8.70  | 0.55 | 0.00 | 2 | 1 | 2 | VTSLTAC[339]LVDQSLR                               | 1 |
|                                                                                                                                                                                     |      |       |      |      |   |   | 2 | VTSLTAC[330]LVDQSLR                               | 1 |
|                                                                                                                                                                                     |      |       |      |      |   |   | 2 | MC[330]SADYAGLLQTFQVFILDELTAR                     | 1 |
| THYG_HUMAN (P01266) Thyroglobulin precursor [MASS=304731]                                                                                                                           | *    | 3.18  | *    | *    | * | 4 | 3 | NGDYQAVQC[339]QTEGPC[330]WC[339]VDAQGKEM[147]HGTR | 1 |
|                                                                                                                                                                                     |      |       |      |      |   |   | 2 | SHGQDSPAVALKKGQGSTTTLQK                           | 1 |
|                                                                                                                                                                                     |      |       |      |      |   |   | 1 | LPFQKLM[147]GISIR                                 | 1 |
| TIAM1_HUMAN (Q13009) T-lymphoma invasion and metastasis-inducing protein 1 (TIAM-1 protein) [MASS=177637]                                                                           | 0.00 | 2.51  | 0.46 | 0.00 | 1 | 2 | 3 | MPPAAAEETPPYSNYNTLPC[330]RK                       | 1 |
|                                                                                                                                                                                     |      |       |      |      |   |   | 3 | QHSYTSNGPTFM[147]ETASFK                           | 1 |
|                                                                                                                                                                                     |      |       |      |      |   |   | 2 | C[339]VPPHYK                                      | 1 |
| TIM10_HUMAN (P62072) Mitochondrial import inner membrane translocase subunit Tim10 [MASS=10333]                                                                                     | 1.00 | 31.11 | 2.00 | 0.04 | 5 | 3 | 2 | M[147]TSAC[339]HR                                 | 1 |
|                                                                                                                                                                                     |      |       |      |      |   |   | 2 | EAELSKGESVC[330]LDR                               | 1 |
|                                                                                                                                                                                     |      |       |      |      |   |   | 2 | EAELSKGESVC[339]LDR                               | 1 |
|                                                                                                                                                                                     |      |       |      |      |   |   | 2 | C[330]VPPHYK                                      | 1 |
| TIM13_HUMAN (Q9Y5L4) Mitochondrial import inner membrane translocase subunit Tim13 [MASS=10500]                                                                                     | 0.98 | 15.79 | 1.81 | 0.01 | 2 | 1 | 3 | C[339]IGKPGGSLDNSEQK                              | 1 |
|                                                                                                                                                                                     |      |       |      |      |   |   | 2 | C[330]IGKPGGSLDNSEQK                              | 1 |
| TIM9_HUMAN (Q9Y5J7) Mitochondrial import inner membrane translocase subunit Tim9 [MASS=10378]                                                                                       | 1.00 | 17.98 | 1.69 | 0.02 | 3 | 1 | 2 | EVKPEETTC[339]SEHC[339]LQK                        | 1 |
|                                                                                                                                                                                     |      |       |      |      |   |   | 2 | EVKPEETTC[330]SEHC[330]LQK                        | 1 |
|                                                                                                                                                                                     |      |       |      |      |   |   | 3 | EVKPEETTC[330]SEHC[330]LQK                        | 1 |

|                                                                                                                                                                                                                                                             |      |       |      |      |   |   |   |                                                        |   |
|-------------------------------------------------------------------------------------------------------------------------------------------------------------------------------------------------------------------------------------------------------------|------|-------|------|------|---|---|---|--------------------------------------------------------|---|
| TLK2_HUMAN (Q86UE8) Serine/threonine-protein kinase tousled-like 2 (EC 2.7.11.1) (Tousled-like kinase 2) (PKU-alpha) [MASS=87660]                                                                                                                           | *    | 4.66  | *    | *    | * | 2 | 3 | SVSTSSPAGAAIASTSGASNNSSSN                              | 1 |
|                                                                                                                                                                                                                                                             |      |       |      |      |   |   | 3 | MAC[339]RDKSM[147]QDR                                  | 3 |
| TMP57_HUMAN (Q7RXY8) Transmembrane protease, serine 7 precursor (EC 3.4.21.-) [MASS=64041]                                                                                                                                                                  | *    | 7.52  | *    | *    | * | 2 | 3 | IC[339]EPTRLMSFVSTNNLMLVTFKSPHIR                       | 1 |
|                                                                                                                                                                                                                                                             |      |       |      |      |   |   | 2 | MC[330]HFKLVAIVGYLIR                                   | 1 |
| TNF13_HUMAN (O75888) Tumor necrosis factor ligand superfamily member 13 precursor (A proliferation-inducing ligand) (APRIL) (TNF- and APOL-related leukocyte expressed ligand 2) (TALL-2) (TNF-related death ligand 1) (TRDL1) (CD256 antigen) [MASS=27433] | 0.00 | 13.20 | 1.39 | 0.00 | 1 | 1 | 3 | SMPSHPDRAVNSC[339]YSAGVFHLHQGDILSVIIPR                 | 1 |
| TNR8_HUMAN (P28908) Tumor necrosis factor receptor superfamily member 8 precursor (CD30L receptor) (Lymphocyte activation antigen CD30) (KI-1 antigen) [MASS=63747]                                                                                         | *    | 10.92 | *    | *    | * | 3 | 3 | IYIM[147]KADTVIVGTVKAELPEGR                            | 1 |
|                                                                                                                                                                                                                                                             |      |       |      |      |   |   | 2 | KQC[339]EPDYLLDEADR                                    | 1 |
|                                                                                                                                                                                                                                                             |      |       |      |      |   |   | 3 | PGM[147]IC[330]ATSATNSC[330]ARC[339]VPYPIC[339]AAETVTK | 1 |
| TOM40_HUMAN (O96008) Probable mitochondrial import receptor subunit TOM40 homolog (Translocase of outer membrane 40 kDa subunit homolog) (Haymaker protein) (p38.5) [MASS=37893]                                                                            | 0.73 | 9.14  | 1.25 | 0.00 | 1 | 1 | 3 | TPGAATASASGAAEDGAC[339]GC[339]LPNPGTFEEC[339]HRK       | 1 |

|                                                                                                                          |      |       |      |      |    |    |  |   |                                            |   |
|--------------------------------------------------------------------------------------------------------------------------|------|-------|------|------|----|----|--|---|--------------------------------------------|---|
|                                                                                                                          |      |       |      |      |    |    |  | 2 | WKEVAQDC[339]TK                            | 1 |
|                                                                                                                          |      |       |      |      |    |    |  | 3 | SEM[147]EM[147]AHLYSLC[339]DAAHAQTEVAK     | 1 |
|                                                                                                                          |      |       |      |      |    |    |  | 3 | ILLDQVEEAVADFDEC[339]IR                    | 2 |
|                                                                                                                          |      |       |      |      |    |    |  | 2 | C[339]IDLEPDNATTYVHK                       | 1 |
|                                                                                                                          |      |       |      |      |    |    |  | 3 | ADEM[147]YDKC[339]IDLEPDNATTYVHK           | 1 |
|                                                                                                                          |      |       |      |      |    |    |  | 2 | QYM[147]EEENYDKIISEC[339]SK                | 1 |
|                                                                                                                          |      |       |      |      |    |    |  | 2 | SEM[147]EM[147]AHLYSLC[339]DAAHAQTEVAK     | 1 |
|                                                                                                                          |      |       |      |      |    |    |  | 3 | QYM[147]EEENYDKIISEC[339]SK                | 1 |
|                                                                                                                          |      |       |      |      |    |    |  | 2 | ILLDQVEEAVADFDEC[339]IR                    | 2 |
| TOM70_HUMAN (O94826) Mitochondrial precursor proteins import receptor (Translocase of outer membrane TOM70) [MASS=67454] | 1.00 | 32.57 | 1.39 | 0.06 | 15 | 12 |  | 2 | ENSGYLK                                    | 1 |
|                                                                                                                          |      |       |      |      |    |    |  | 3 | EC[339]LEDVTAVC[339]ILEGFQNQQSM[147]LLADK  | 1 |
|                                                                                                                          |      |       |      |      |    |    |  | 3 | C[330]DFAYETM[147]GTIEVQRGNMEKAIDM[147]FNK | 1 |
|                                                                                                                          |      |       |      |      |    |    |  | 1 | RNSER                                      | 2 |
|                                                                                                                          |      |       |      |      |    |    |  | 2 | YGLKPPTL                                   | 2 |
|                                                                                                                          |      |       |      |      |    |    |  | 3 | ILLDQVEEAVADFDEC[330]IR                    | 1 |
|                                                                                                                          |      |       |      |      |    |    |  | 2 | C[339]AEGYALYAQALTDQQQFGK                  | 2 |
| TOP1M_HUMAN (Q969P6) DNA topoisomerase I, mitochondrial precursor (EC 5.99.1.2) (TOP1mt) [MASS=69871]                    | 0.00 | 13.48 | 1.87 | 0.00 | 1  | 4  |  | 2 | LKGETAWQK                                  | 1 |
|                                                                                                                          |      |       |      |      |    |    |  | 3 | WRQLEHKGPFYAPPYEPLPDGVR                    | 1 |
|                                                                                                                          |      |       |      |      |    |    |  | 2 | SDNTVTWLAAWTESVQNSIKYIM[147]LNPC[339]SK    | 1 |
|                                                                                                                          |      |       |      |      |    |    |  | 2 | LTTTSLNKHLLQELMDGLTAK                      | 1 |
| TOP1_HUMAN (P11387) DNA topoisomerase 1 (EC 5.99.1.2) (DNA topoisomerase I) [MASS=90725]                                 | 0.00 | 4.71  | 0.41 | 0.00 | 1  | 2  |  | 3 | LALRAGNEKEEGETADTVGC[330]C[339]SLR         | 1 |
|                                                                                                                          |      |       |      |      |    |    |  | 2 | IMPEDIINC[330]SK                           | 1 |
| TP53B_HUMAN (Q12888) Tumor suppressor p53-binding protein 1 (p53-binding protein 1) (p53BP1) (53BP1) [MASS=213573]       | 0.00 | 4.31  | 0.65 | 0.00 | 1  | 4  |  | 3 | GNULLHFPSSQGEEEEK                          | 1 |
|                                                                                                                          |      |       |      |      |    |    |  | 3 | EQEAWEEATSEDSSVIVDVKEPSPR                  | 1 |
|                                                                                                                          |      |       |      |      |    |    |  | 2 | NSPEDLGLSLTGDSC[330]K                      | 1 |
|                                                                                                                          |      |       |      |      |    |    |  | 3 | TSSVLGM[147]SVESAPAVEEKEEGEELEQK           | 1 |
| TPIS_HUMAN (P60174) Triosephosphate isomerase (EC 5.3.1.1) (TIM) (Triose-phosphate isomerase) [MASS=26538]               | 1.00 | 24.60 | 0.76 | 0.03 | 2  | 3  |  | 2 | EAGITEKVVFEQTK                             | 1 |
|                                                                                                                          |      |       |      |      |    |    |  | 2 | VAHALAEGLGVIAC[339]IGEK                    | 1 |
|                                                                                                                          |      |       |      |      |    |    |  | 2 | VAHALAEGLGVIAC[330]IGEK                    | 1 |
|                                                                                                                          |      |       |      |      |    |    |  | 3 | GWLKSNVSDAVAQSTRIIYGGSVTGATC[330]K         | 1 |
| TPM2_HUMAN (P07951) Tropomyosin beta chain (Tropomyosin 2) (Beta-tropomyosin) [MASS=32851]                               | 0.00 | 16.90 | 2.27 | 0.00 | 1  | 3  |  | 3 | EAKHIAEDSDRK                               | 1 |
|                                                                                                                          |      |       |      |      |    |    |  | 2 | SVAKLEKTIDDLEDEVYAKQ                       | 1 |
|                                                                                                                          |      |       |      |      |    |    |  | 2 | C[339]GDLEEEELKIVTNLTK                     | 1 |

|                                                                                                                                                                                                         |      |       |      |      |   |   |                                                                          |                                    |   |
|---------------------------------------------------------------------------------------------------------------------------------------------------------------------------------------------------------|------|-------|------|------|---|---|--------------------------------------------------------------------------|------------------------------------|---|
| TR11B_HUMAN (O00300) Tumor necrosis factor receptor superfamily member 11B precursor (Osteoprotegerin) (Osteoclastogenesis inhibitory factor) [MASS=46040]                                              | *    | 3.99  | *    | *    | * | 1 | 3                                                                        | TIRFLHSFTM[147]YKLYQK              | 1 |
| TR2_HUMAN (P13056) Orphan nuclear receptor TR2 (Testicular receptor 2) [MASS=53042]                                                                                                                     | *    | 6.21  | *    | *    | * | 1 | 2                                                                        | STGLLDSGMFMNIHPGSKTESAVLM[147]TSDK | 1 |
| TRABD_HUMAN (Q9UGI0) Protein TRABID (Zinc finger Ran-binding domain-containing protein 1) [MASS=80907]                                                                                                  | 0.00 | 6.92  | 4.37 | 0.00 | 1 | 3 | 2 SSSYM[147]JENANK<br>3 KALHDSLHDC[339]SHWFYTR<br>3 EEEEEPIIWSLELATRLDSR | 1<br>1<br>1                        |   |
| TRAF7_HUMAN (Q6Q0C0) E3 ubiquitin protein ligase TRAF7 (EC 6.3.2.-) (TNF receptor-associated factor 7) (Ring finger and WD repeat domain 1) (RING finger protein 119) [MASS=74609]                      | 0.00 | 1.34  | 0.46 | 0.00 | 1 | 1 | 2 VWDTC[330]TTYK                                                         | 1                                  |   |
| TRAP1_HUMAN (Q12931) Heat shock protein 75 kDa, mitochondrial precursor (HSP 75) (Tumor necrosis factor type 1 receptor-associated protein) (TRAP-1) (TNFR-associated protein 1) [MASS=80109]           | 0.00 | 5.11  | 1.26 | 0.00 | 1 | 3 | 2 ELLQESALIRK<br>1 LLDIVAR<br>2 APALAAVPGGKILC[339]PRR                   | 1<br>1<br>1                        |   |
| TRI11_HUMAN (Q96F44) Tripartite motif-containing protein 11 (EC 6.3.2.-) (RING finger protein 92) (Protein BIA1) [MASS=52774]                                                                           | *    | 2.56  | *    | *    | * | 1 | 2 LQPPEVPMELR                                                            | 1                                  |   |
| TRI29_HUMAN (Q14134) Tripartite motif-containing protein 29 (Ataxia-telangiectasia group D-associated protein) [MASS=65806]                                                                             | *    | 2.21  | *    | *    | * | 1 | 2 KPPVTFAEKGDVR                                                          | 1                                  |   |
| TRI37_HUMAN (O94972) Tripartite motif-containing protein 37 (Mulibrey nanism protein) [MASS=107905]                                                                                                     | *    | 5.19  | *    | *    | * | 2 | 3 MDEQSVESIAEVFRC[330]FIC[330]MEK<br>3 RTHLC[330]SAATSSLLDIDPLILHLLDLKDR | 1<br>1                             |   |
| TRI54_HUMAN (Q9BYV2) Tripartite motif-containing protein 54 (Muscle-specific RING finger protein 3) (MuRF3) (MURF-3) (Muscle-specific RING finger protein) (MuRF) (RING finger protein 30) [MASS=40328] | *    | 10.06 | *    | *    | * | 2 | 3 RQKNELSDGIAM[147]LVAGNDR<br>2 NLLVENIIDYKQESSR                         | 1<br>1                             |   |
| TRI56_HUMAN (Q9BRZ2) Tripartite motif-containing protein 56 (RING finger protein 109) [MASS=81487]                                                                                                      | 0.00 | 5.83  | 1.02 | 0.00 | 1 | 2 | 3 M[147]VSHGSSPSLLEALSSDFLAC[330]K<br>3 PGLEGLLAGVDNNLVELEAARR           | 1<br>1                             |   |



|                                                                                                                                                                                                                                                                             |      |      |      |      |   |   |                  |                                                                                    |                  |
|-----------------------------------------------------------------------------------------------------------------------------------------------------------------------------------------------------------------------------------------------------------------------------|------|------|------|------|---|---|------------------|------------------------------------------------------------------------------------|------------------|
| TRIM1_HUMAN (Q9UJV3) Midline-2 (Midline defect 2) (Tripartite motif-containing protein 1) (Midin-2) (RING finger protein 60) [MASS=81264]                                                                                                                                   | *    | 2.66 | *    | *    | * | 1 | 2                | STVLINQAEHILKENDQAR                                                                | 1                |
| TRIM3_HUMAN (O75382) Tripartite motif-containing protein 3 (RING finger protein 22) (Brain-expressed RING finger protein) (RING finger protein 97) [MASS=80836]                                                                                                             | *    | 1.75 | *    | *    | * | 1 | 2                | RKDNPIEDELVFR                                                                      | 1                |
| TRIM9_HUMAN (Q9C026) Tripartite motif-containing protein 9 (RING finger protein 91) [MASS=79177]                                                                                                                                                                            | 0.00 | 1.55 | *    | *    | * | 1 | 2                | M[147]DVM[147]KDVM[147]LGK                                                         | 1                |
| TRIO_HUMAN (O75962) Triple functional domain protein (PTPRF-interacting protein) [MASS=341614]                                                                                                                                                                              | *    | 1.18 | *    | *    | * | 2 | 2<br>3           | GQTVEVLER<br>THQSALQVQQKAEAMLQANHYDMDM[147]IR                                      | 1<br>1           |
| TRMU_HUMAN (O75648) tRNA (5-methylaminomethyl-2-thiouridylate)-methyltransferase (EC 2.1.1.61) [MASS=47744]                                                                                                                                                                 | 0.00 | 6.41 | 0.43 | 0.00 | 1 | 1 | 3                | HQM[147]ALVPC[330]VLTLNQDGTVVVTAVQAVR                                              | 1                |
| TRPM3_HUMAN (Q9HCF6) Transient receptor potential cation channel subfamily M member 3 (Long transient receptor potential channel 3) (LTrpC3) (Melastatin-2) (MLSN2) [MASS=197529]                                                                                           | *    | 3.35 | *    | *    | * | 3 | 2<br>2<br>3<br>2 | LTVLNSMHSFILADNGTTGKYGAEVK<br>QRNTASLQNPFRSK<br>QRNTASLQNPFRSK<br>DEEEVQSKHRLIPLGR | 1<br>1<br>1<br>1 |
| TRPV1_HUMAN (Q8NER1) Transient receptor potential cation channel subfamily V member 1 (TrpV1) (osm-9-like TRP channel 1) (OTRPC1) (Vanilloid receptor 1) (Capsaicin receptor) [MASS=94938]                                                                                  | 0.00 | 3.81 | 5.98 | 0.00 | 1 | 2 | 3<br>3           | GFQQMGYAVM[147]IEKM[147]ILRDLC[339]R<br>IAQESKNIWK                                 | 1<br>1           |
| TRPV4_HUMAN (Q9HBA0) Transient receptor potential cation channel subfamily V member 4 (TrpV4) (osm-9-like TRP channel 4) (OTRPC4) (Vanilloid receptor-like channel 2) (Vanilloid receptor-like protein 2) (VRL-2) (Vanilloid receptor-related osmotically-acti [MASS=98281] | *    | 1.26 | *    | *    | * | 1 | 2                | LTGTYSIM[147]IQK                                                                   | 1                |
| TRXR2_HUMAN (Q9NNW7) Thioredoxin reductase 2, mitochondrial precursor (EC 1.8.1.9) (TR3) (TR-beta) (Selenoprotein Z) (SelZ) [MASS=56459]                                                                                                                                    | 0.99 | 5.53 | 1.10 | 0.00 | 1 | 2 | 2<br>3           | C[339]GASYAQVM[147]R<br>YFNIKASFVDEHTVC[339]GVAK                                   | 1<br>1           |

|                                                                                                                                                                                   |      |      |      |      |   |   |   |                                                                                                     |                  |
|-----------------------------------------------------------------------------------------------------------------------------------------------------------------------------------|------|------|------|------|---|---|---|-----------------------------------------------------------------------------------------------------|------------------|
| TSKS_HUMAN (Q9UJT2) Testis-specific serine kinase substrate (Testis-specific kinase substrate) (STK22 substrate 1) [MASS=65050]                                                   | 0.00 | 7.94 | 1.33 | 0.00 | 1 | 2 | 3 | M[147]C[339]SLHDHLSNLPLEGSTGMTGGGSSAGTPPK<br>VTRSVEDAEIKTNVLK                                       | 1<br>1           |
| TSSK6_HUMAN (Q9BXA6) Testis-specific serine/threonine-protein kinase 6 (EC 2.7.11.1) (TSSK-6) (Small serine/threonine kinase) (Serine/threonine-protein kinase SSTK) [MASS=30331] | *    | 5.49 | *    | *    | * | 1 | 2 | DLKC[330]ENVLLSPDERR                                                                                | 1                |
| TTC15_HUMAN (Q8WVT3) Tetratricopeptide repeat protein 15 (TPR repeat protein 15) [MASS=79361]                                                                                     | *    | 5.99 | *    | *    | * | 2 | 2 | PEQEPPVAEPVVC[330]TIFSQR<br>ENLTM[147]PGLRFDNIQGDVAVKDLMLR                                          | 1<br>1           |
| TTC7A_HUMAN (Q9ULT0) Tetratricopeptide repeat protein 7A (TPR repeat protein 7) [MASS=96184]                                                                                      | 0.00 | 7.69 | 0.65 | 0.00 | 1 | 3 | 2 | DAISMYARAGIDDMSMENKPLYQMR<br>LWQTLYSFSQLGGLEKDGSGFGEGLTMK<br>GPEEALVTC[330]RQVLR                    | 1<br>1<br>1      |
| TWF2_HUMAN (Q6IBS0) Twinfilin-2 (Twinfilin-1-like protein) (A6-related protein) (hA6RP) (Protein tyrosine kinase 9-like) [MASS=39548]                                             | 0.99 | 4.58 | 0.41 | 0.00 | 1 | 1 | 2 | HLSSC[330]AAPAPLTAER                                                                                | 1                |
| TXND5_HUMAN (Q8NBS9) Thioredoxin domain-containing protein 5 precursor (Thioredoxin-like protein p46) (Endoplasmic reticulum protein ERp46) [MASS=47629]                          | 0.98 | 3.70 | 0.82 | 0.00 | 1 | 1 | 2 | VDC[339]TAHSDVC[339]SAQGVR                                                                          | 1                |
| UB2Q2_HUMAN (Q8WVN8) Ubiquitin-conjugating enzyme E2 Q2 (EC 6.3.2.19) (Ubiquitin-protein ligase Q2) (Ubiquitin carrier protein Q2) [MASS=42818]                                   | *    | 5.33 | *    | *    | * | 1 | 2 | QDHLNGAVSGSVQASDRLMK                                                                                | 1                |
| UBE1_HUMAN (P22314) Ubiquitin-activating enzyme E1 (A1S9 protein) [MASS=117848]                                                                                                   | 0.96 | 3.21 | 0.48 | 0.00 | 1 | 2 | 2 | VGEFC[330]HNR<br>LAYVAAGDLAPINAFIIGGLAAQEVMK                                                        | 1<br>1           |
| UBE4A_HUMAN (Q14139) Ubiquitin conjugation factor E4 A [MASS=122560]                                                                                                              | *    | 1.78 | *    | *    | * | 1 | 2 | HC[330]ILSWLGNC[330]LHANAGRTK                                                                       | 1                |
| UBN1_HUMAN (Q9NPG3) Ubinuclein (Ubiquitously expressed nuclear protein) (VT4) [MASS=121540]                                                                                       | *    | 7.76 | *    | *    | * | 4 | 2 | MSEPHRVQFTSLPGSLNPAFLK<br>ELAALNSRAAGNSEFTLPAPSK<br>PSPSAPPPASSLQSPNFLAEQALALGQSSQEK<br>VEALARKFEEK | 1<br>1<br>1<br>1 |

|                                                                                                                                                                                                                                |      |       |      |      |   |   |   |                                          |   |
|--------------------------------------------------------------------------------------------------------------------------------------------------------------------------------------------------------------------------------|------|-------|------|------|---|---|---|------------------------------------------|---|
|                                                                                                                                                                                                                                |      |       |      |      |   |   | 3 | NDSVIVDTFHGLFK                           | 8 |
| UBP11_HUMAN (P51784) Ubiquitin carboxyl-terminal hydrolase 11 (EC 3.1.2.15) (Ubiquitin thioesterase 11) (Ubiquitin-specific-processing protease 11) (Deubiquitinating enzyme 11) [MASS=105030]                                 | 0.00 | 8.70  | 0.31 | 0.00 | 1 | 4 |   |                                          |   |
|                                                                                                                                                                                                                                |      |       |      |      |   |   | 3 | TPARDYNNSYYGLMLFGHPLLVSVPDR              | 1 |
|                                                                                                                                                                                                                                |      |       |      |      |   |   | 2 | C[330]PFLDNC[330]LGTSQWPPR               | 1 |
|                                                                                                                                                                                                                                |      |       |      |      |   |   | 2 | HTGISPERM[147]M[147]VADVFSHRFYK          | 1 |
| UBP37_HUMAN (Q86T82) Ubiquitin carboxyl-terminal hydrolase 37 (EC 3.1.2.15) (Ubiquitin thioesterase 37) (Ubiquitin-specific-processing protease 37) (Deubiquitinating enzyme 37) [MASS=110100]                                 | *    | 2.86  | *    | *    | * | 2 |   |                                          |   |
|                                                                                                                                                                                                                                |      |       |      |      |   |   | 3 | DAEEMRFLDAVHQNRLLPAAMK                   | 1 |
|                                                                                                                                                                                                                                |      |       |      |      |   |   | 1 | LPAAMK                                   | 1 |
| UBP38_HUMAN (Q8NB14) Ubiquitin carboxyl-terminal hydrolase 38 (EC 3.1.2.15) (Ubiquitin thioesterase 38) (Ubiquitin-specific-processing protease 38) (Deubiquitinating enzyme 38) (HP43.8KD) [MASS=116545]                      | 0.00 | 8.06  | 2.60 | 0.00 | 1 | 4 |   |                                          |   |
|                                                                                                                                                                                                                                |      |       |      |      |   |   | 2 | TGLINLGNTC[330]YM[147]NSVIQALFMATDFRR    | 1 |
|                                                                                                                                                                                                                                |      |       |      |      |   |   | 3 | ELREYVSQVTKVSNLLQNIWK                    | 1 |
|                                                                                                                                                                                                                                |      |       |      |      |   |   | 2 | TM[147]QITEEPEYLILTLRR                   | 1 |
|                                                                                                                                                                                                                                |      |       |      |      |   |   | 2 | LQHLFAFLAHTQREAYAPR                      | 1 |
| UBP4_HUMAN (Q13107) Ubiquitin carboxyl-terminal hydrolase 4 (EC 3.1.2.15) (Ubiquitin thioesterase 4) (Ubiquitin-specific-processing protease 4) (Deubiquitinating enzyme 4) (Ubiquitous nuclear protein homolog) [MASS=108564] | *    | 2.80  | *    | *    | * | 1 |   |                                          |   |
|                                                                                                                                                                                                                                |      |       |      |      |   |   | 3 | EQLSETEGSGEDEPGNDPSETTQKKIK              | 1 |
| UBP5_HUMAN (P45974) Ubiquitin carboxyl-terminal hydrolase 5 (EC 3.1.2.15) (Ubiquitin thioesterase 5) (Ubiquitin-specific-processing protease 5) (Deubiquitinating enzyme 5) (Isopeptidase T) [MASS=95786]                      | 0.99 | 5.71  | 1.06 | 0.00 | 1 | 2 |   |                                          |   |
|                                                                                                                                                                                                                                |      |       |      |      |   |   | 2 | NLGNSC[339]YLNNSVVQVLFSPDFQR             | 1 |
|                                                                                                                                                                                                                                |      |       |      |      |   |   | 3 | VDYIM[147]QLPVPM[147]DAALNKEELLEYEEK     | 1 |
| UBQL1_HUMAN (Q9UMX0) Ubiquilin-1 (Protein linking IAP with cytoskeleton 1) (PLIC-1) (hPLIC-1) [MASS=62519]                                                                                                                     | *    | 1.70  | *    | *    | * | 1 |   |                                          |   |
|                                                                                                                                                                                                                                |      |       |      |      |   |   | 2 | NPAMMQEMM[147]R                          | 1 |
| UBQL3_HUMAN (Q9H347) Ubiquilin-3 [MASS=70841]                                                                                                                                                                                  | 0.00 | 11.60 | 1.07 | 0.00 | 1 | 3 |   |                                          |   |
|                                                                                                                                                                                                                                |      |       |      |      |   |   | 3 | QLVLDNPHM[147]QQLIQHNPEIGHILNNPEIM[147]R | 1 |
|                                                                                                                                                                                                                                |      |       |      |      |   |   | 2 | QDGDQDAPDIRNRFNPLGIIR                    | 1 |
|                                                                                                                                                                                                                                |      |       |      |      |   |   | 2 | MENC[330]DPLPNPWTSTHGGSGSRQGR            | 1 |

|                                                                                                                                                                                                                                  |      |       |       |      |    |   |   |                                             |   |
|----------------------------------------------------------------------------------------------------------------------------------------------------------------------------------------------------------------------------------|------|-------|-------|------|----|---|---|---------------------------------------------|---|
| UCHL1_HUMAN (P09936) Ubiquitin carboxyl-terminal hydrolase isozyme L1 (EC 3.4.19.12) (EC 6.-.-.) (UCH-L1) (Ubiquitin thioesterase L1) (Neuron cytoplasmic protein 9.5) (PGP 9.5) (PGP9.5) [MASS=24824]                           | 1.00 | 35.87 | 0.71  | 0.06 | 8  | 4 | 2 | C[330]FEKNEAIQAAHDAVAQEGQC[330]R            | 1 |
|                                                                                                                                                                                                                                  |      |       |       |      |    |   | 2 | NEAIQAAHDAVAQEGQC[330]R                     | 2 |
|                                                                                                                                                                                                                                  |      |       |       |      |    |   | 3 | NEAIQAAHDAVAQEGQC[330]R                     | 2 |
|                                                                                                                                                                                                                                  |      |       |       |      |    |   | 3 | QTIGNSC[330]GTIGLIHAVANNQDKLGFEDGSVLK       | 1 |
|                                                                                                                                                                                                                                  |      |       |       |      |    |   | 2 | C[339]FEKNEAIQAAHDAVAQEGQC[339]R            | 1 |
|                                                                                                                                                                                                                                  |      |       |       |      |    |   | 2 | NEAIQAAHDAVAQEGQC[339]R                     | 1 |
|                                                                                                                                                                                                                                  |      |       |       |      |    |   | 1 | FSAVALC[330]K                               | 2 |
| UCP4_HUMAN (O95847) Mitochondrial uncoupling protein 4 (UCP 4) (Solute carrier family 25 member 27) [MASS=36064]                                                                                                                 | 0.99 | 18.27 | 1.77  | 0.00 | 1  | 3 | 2 | TRLQM[147]QGAAALAR                          | 1 |
|                                                                                                                                                                                                                                  |      |       |       |      |    |   | 3 | FLLSGC[339]AATVAELATFPLDLTK                 | 1 |
|                                                                                                                                                                                                                                  |      |       |       |      |    |   | 3 | GFLPSWLRMTPWSM[147]VFWLTYEKIR               | 1 |
| UCRH_HUMAN (P07919) Ubiquinol-cytochrome c reductase complex 11 kDa protein, mitochondrial precursor (EC 1.10.2.2) (Mitochondrial hinge protein) (Cytochrome C1, nonheme 11 kDa protein) (Complex III subunit VIII) [MASS=10739] | 1.00 | 46.15 | 1.62  | 0.05 | 18 | 4 | 2 | EQC[330]EQLEK                               | 2 |
|                                                                                                                                                                                                                                  |      |       |       |      |    |   | 2 | SHTEEDC[339]TEELDFDLHAR                     | 2 |
|                                                                                                                                                                                                                                  |      |       |       |      |    |   | 3 | SHTEEDC[339]TEELDFDLHAR                     | 2 |
|                                                                                                                                                                                                                                  |      |       |       |      |    |   | 2 | SHTEEDC[330]TEELDFDLHAR                     | 2 |
|                                                                                                                                                                                                                                  |      |       |       |      |    |   | 1 | DHC[339]VAHK                                | 2 |
|                                                                                                                                                                                                                                  |      |       |       |      |    |   | 2 | ERLELC[330]DER                              | 1 |
|                                                                                                                                                                                                                                  |      |       |       |      |    |   | 2 | DHC[330]VAHK                                | 2 |
|                                                                                                                                                                                                                                  |      |       |       |      |    |   | 2 | ERLELC[339]DER                              | 2 |
|                                                                                                                                                                                                                                  |      |       |       |      |    |   | 2 | DHC[339]VAHK                                | 3 |
|                                                                                                                                                                                                                                  |      |       |       |      |    |   | 3 | SHTEEDC[330]TEELDFDLHAR                     | 1 |
| UD12_HUMAN (P36509) UDP-glucuronosyltransferase 1-2 precursor (EC 2.4.1.17) (UDP-glucuronosyltransferase 1A2) (UDPGT) (UGT1*2) (UGT1-02) (UGT1.2) (UGT-1B) (UGT1B) (HLUGP4) [MASS=60018]                                         | 0.00 | 6.04  | 0.08  | 0.00 | 1  | 2 | 2 | NHIMHLEEHLIC[330]HR                         | 1 |
|                                                                                                                                                                                                                                  |      |       |       |      |    |   | 2 | ERVRNHIMHLEEHLIC[330]HR                     | 1 |
| UFO_HUMAN (P30530) Tyrosine-protein kinase receptor UFO precursor (EC 2.7.10.1) (AXL oncogene) [MASS=97436]                                                                                                                      | 0.00 | 4.40  | 10.22 | 0.00 | 1  | 2 | 2 | LIGVC[339]FQGSR                             | 1 |
|                                                                                                                                                                                                                                  |      |       |       |      |    |   | 3 | FIHRDLAARNC[339]MLNENM[147]SVC[339]VADFGLSK | 1 |

|                                                                                                                                                                                                                  |      |       |      |      |    |   |   |                                                |   |
|------------------------------------------------------------------------------------------------------------------------------------------------------------------------------------------------------------------|------|-------|------|------|----|---|---|------------------------------------------------|---|
| UGGG1_HUMAN (Q9NYU2) UDP-glucose:glycoprotein glucosyltransferase 1 precursor (EC 2.4.1.-) (UDP-glucose ceramide glucosyltransferase-like 1) (UDP--Glc:glycoprotein glucosyltransferase) (HUGT1) [MASS=174976]   | 0.00 | 2.61  | *    | *    | *  | 2 | 3 | YNSWPSSLQELLR                                  | 1 |
|                                                                                                                                                                                                                  |      |       |      |      |    |   | 2 | GTEVNTTVIGENDPIDEVQGFLFGKLR                    | 1 |
| UGTAP_HUMAN (Q9HD40) UGA suppressor tRNA-associated protein (tRNA(Ser/Sec)-associated antigenic protein) (SLA/LP autoantigen) (Soluble liver antigen) (SLA) (Liver-pancreas antigen) (LP) (SLA-p35) [MASS=55726] | *    | 2.79  | *    | *    | *  | 1 | 3 | LVSPAYVRQGC[339]EAR                            | 1 |
| ULK1_HUMAN (O75385) Serine/threonine-protein kinase ULK1 (EC 2.7.11.1) (Unc-51-like kinase 1) [MASS=112601]                                                                                                      | *    | 6.19  | *    | *    | *  | 4 | 3 | LIFSHAVQM[147]VQSAALDEM[147]FQHR               | 1 |
|                                                                                                                                                                                                                  |      |       |      |      |    |   | 3 | NLAKSQTLGKEIK                                  | 1 |
|                                                                                                                                                                                                                  |      |       |      |      |    |   | 2 | PGWSGTPSPQGAEMRGGR                             | 1 |
|                                                                                                                                                                                                                  |      |       |      |      |    |   | 2 | QGVVM[147]TPPRNR                               | 1 |
| ULK2_HUMAN (Q8IYT8) Serine/threonine-protein kinase ULK2 (EC 2.7.11.1) (Unc-51-like kinase 2) [MASS=112726]                                                                                                      | *    | 2.32  | *    | *    | *  | 1 | 2 | LSDQQGKTPIC[339]RHQGSTDSLNTER                  | 1 |
| UN13B_HUMAN (O14795) Unc-13 homolog B (Munc13-2) (munc13) [MASS=180683]                                                                                                                                          | 0.00 | 2.89  | 0.86 | 0.00 | 1  | 2 | 3 | VLGLAVM[147]PLRDVTAKGSC[339]AC[330]WC[330]PLGR | 1 |
|                                                                                                                                                                                                                  |      |       |      |      |    |   | 2 | DDEIC[330]GTRNPTPHKILLDTR                      | 1 |
| UNC5C_HUMAN (O95185) Netrin receptor UNC5C precursor (Unc-5 homolog C) (Unc-5 homolog 3) [MASS=103101]                                                                                                           | *    | 3.54  | *    | *    | *  | 1 | 2 | SSPTGVILDLWEAQNFDPGNLSMLAAVLEEM[147]GR         | 1 |
|                                                                                                                                                                                                                  |      |       |      |      |    |   | 3 | NALVSHLDGTPVC[339]EDIGR                        | 1 |
|                                                                                                                                                                                                                  |      |       |      |      |    |   | 2 | DVILREM[147]QENDASM[147]R                      | 1 |
|                                                                                                                                                                                                                  |      |       |      |      |    |   | 2 | NALVSHLDGTPVC[339]EDIGR                        | 1 |
|                                                                                                                                                                                                                  |      |       |      |      |    |   | 3 | LC[339]QSFQTFASIC[339]YAETGLLGAHFVC[339]DR     | 1 |
|                                                                                                                                                                                                                  |      |       |      |      |    |   | 2 | LC[339]TSATESEVAR                              | 2 |
| UQCR1_HUMAN (P31930) Ubiquinol-cytochrome-c reductase complex core protein I, mitochondrial precursor (EC 1.10.2.2) [MASS=52645]                                                                                 | 1.00 | 24.58 | 1.77 | 0.12 | 12 | 6 | 2 | NALVSHLDGTPVC[330]EDIGR                        | 1 |
|                                                                                                                                                                                                                  |      |       |      |      |    |   | 2 | YIYDQC[339]PAVAGYGPIQLPDYNR                    | 1 |
|                                                                                                                                                                                                                  |      |       |      |      |    |   | 2 | YIYDQC[330]PAVAGYGPIQLPDYNR                    | 1 |
|                                                                                                                                                                                                                  |      |       |      |      |    |   | 3 | YIYDQC[339]PAVAGYGPIQLPDYNR                    | 1 |
|                                                                                                                                                                                                                  |      |       |      |      |    |   | 2 | AVELLGDIVQNC[339]SLEDSQIEKER                   | 2 |
|                                                                                                                                                                                                                  |      |       |      |      |    |   | 2 | LC[330]TSATESEVAR                              | 2 |

|                                                                                                                                                                                                                                   |      |       |      |      |    |   |   |                                           |   |
|-----------------------------------------------------------------------------------------------------------------------------------------------------------------------------------------------------------------------------------|------|-------|------|------|----|---|---|-------------------------------------------|---|
|                                                                                                                                                                                                                                   |      |       |      |      |    |   | 2 | ENM[147]AYTVEC[339]LR                     | 1 |
|                                                                                                                                                                                                                                   |      |       |      |      |    |   | 2 | NALANPLYC[330]PDYR                        | 2 |
| UQCR2_HUMAN (P22695) Ubiquinol-cytochrome-c reductase complex core protein 2, mitochondrial precursor (EC 1.10.2.2) (Complex III subunit II) [MASS=48443]                                                                         | 1.00 | 5.30  | 1.62 | 0.07 | 10 | 2 | 2 | ENM[147]AYTVEC[330]LR                     | 1 |
|                                                                                                                                                                                                                                   |      |       |      |      |    |   | 3 | NALANPLYC[339]PDYR                        | 1 |
|                                                                                                                                                                                                                                   |      |       |      |      |    |   | 2 | NALANPLYC[339]PDYR                        | 4 |
|                                                                                                                                                                                                                                   |      |       |      |      |    |   | 2 | ENMAYTVEC[339]LR                          | 1 |
|                                                                                                                                                                                                                                   |      |       |      |      |    |   | 1 | NALANPLYC[339]PDYR                        | 1 |
| USH2A_HUMAN (O75445) Usherin precursor (Usher syndrome type-2A protein) (Usher syndrome type IIa protein) [MASS=575597]                                                                                                           | 0.00 | 2.48  | 2.80 | 0.00 | 1  | 7 | 2 | C[339]KANVIGLRC[330]DHC[339]NFGFK         | 1 |
|                                                                                                                                                                                                                                   |      |       |      |      |    |   | 2 | C[339]C[339]ETELIPKSQK                    | 1 |
|                                                                                                                                                                                                                                   |      |       |      |      |    |   | 2 | FRTDQLNGLLLFVYNK                          | 1 |
|                                                                                                                                                                                                                                   |      |       |      |      |    |   | 2 | ESSLPALMTTM[147]M[147]K                   | 1 |
|                                                                                                                                                                                                                                   |      |       |      |      |    |   | 3 | GAVVNLASVSSGAVRVNLDGC[339]LSTDSAVNC[339]R | 1 |
|                                                                                                                                                                                                                                   |      |       |      |      |    |   | 2 | LHAQSHC[330]RC[330]PGSHPRVHPLAQR          | 1 |
|                                                                                                                                                                                                                                   |      |       |      |      |    |   | 2 | TYNIFSDGFLEYSGLNR                         | 1 |
| VA0D_HUMAN (P61421) Vacuolar ATP synthase subunit d (EC 3.6.3.14) (V-ATPase d subunit) (Vacuolar proton pump d subunit) (V-ATPase AC39 subunit) (V-ATPase 40 kDa accessory protein) (P39) (32 kDa accessory protein) [MASS=40329] | 1.00 | 1.99  | 0.53 | 0.01 | 3  | 1 | 2 | LFPHC[339]GR                              | 1 |
|                                                                                                                                                                                                                                   |      |       |      |      |    |   | 2 | LFPHC[330]GR                              | 2 |
| VANG1_HUMAN (Q8TAA9) Vang-like protein 1 (Van Gogh-like protein 1) (Strabismus 2) (Loop-tail protein 2 homolog) (LPP2) [MASS=59975]                                                                                               | 0.00 | 10.50 | 3.18 | 0.00 | 1  | 2 | 3 | HMAGLKVYNVDGPSNATGQSRAMIAAAR              | 1 |
|                                                                                                                                                                                                                                   |      |       |      |      |    |   | 3 | QQNYHSM[147]ESILQHAF[339]ITNGM[147]TPK    | 1 |
| VATA1_HUMAN (P38606) Vacuolar ATP synthase catalytic subunit A, ubiquitous isoform (EC 3.6.3.14) (V-ATPase subunit A 1) (Vacuolar proton pump alpha subunit 1) (V-ATPase 69 kDa subunit 1) (Isoform VA68) [MASS=68304]            | 1.00 | 7.78  | 0.64 | 1.55 | 4  | 3 | 3 | FC[330]PFYKTVGMLSNMIAFYDMARR              | 3 |
|                                                                                                                                                                                                                                   |      |       |      |      |    |   | 2 | C[339]LGNPER                              | 1 |
|                                                                                                                                                                                                                                   |      |       |      |      |    |   | 2 | C[330]LGNPER                              | 1 |
|                                                                                                                                                                                                                                   |      |       |      |      |    |   | 3 | AVETTAQSDNKITWSIIR                        | 1 |
| VATB1_HUMAN (P15313) Vacuolar ATP synthase subunit B, kidney isoform (EC 3.6.3.14) (V-ATPase B1 subunit) (Vacuolar proton pump B isoform 1) (Endomembrane proton pump 58 kDa subunit) [MASS=56980]                                | 0.00 | 17.54 | *    | *    | *  | 5 | 2 | IPIFSAAGLPHNEIAAQIC[339]R                 | 1 |
|                                                                                                                                                                                                                                   |      |       |      |      |    |   | 2 | TVC[339]SVNGPLVVLDRVK                     | 1 |
|                                                                                                                                                                                                                                   |      |       |      |      |    |   | 3 | RIPQAVIDEFYSR                             | 1 |
|                                                                                                                                                                                                                                   |      |       |      |      |    |   | 2 | IPIFSAAGLPHNEIAAQIC[330]R                 | 1 |
|                                                                                                                                                                                                                                   |      |       |      |      |    |   | 3 | EHMQAVTRNYITHPRVTYR                       | 1 |
|                                                                                                                                                                                                                                   |      |       |      |      |    |   | 2 | NFINQGPYENRSM[147]FESLDLSWK               | 1 |

|                                                                                                                                                                                                          |      |       |      |      |    |   |   |                                        |   |
|----------------------------------------------------------------------------------------------------------------------------------------------------------------------------------------------------------|------|-------|------|------|----|---|---|----------------------------------------|---|
| VATB2_HUMAN (P21281) Vacuolar ATP synthase subunit B, brain isoform (EC 3.6.3.14) (V-ATPase B2 subunit) (Vacuolar proton pump B isoform 2) (Endomembrane proton pump 58 kDa subunit) (HO57) [MASS=56500] | 1.00 | 7.83  | 0.92 | 0.14 | 4  | 2 | 2 | GPVVLAEFLDIM[147]GQPINPQC[330]R        | 1 |
|                                                                                                                                                                                                          |      |       |      |      |    |   | 2 | KDHADVSNQLYAC[330]YAIGK                | 1 |
|                                                                                                                                                                                                          |      |       |      |      |    |   | 2 | YQIDPDAC[339]FSAK                      | 2 |
| VDAC1_HUMAN (P21796) Voltage-dependent anion-selective channel protein 1 (VDAC-1) (hVDAC1) (Outer mitochondrial membrane protein porin 1) (Plasmalemmal porin) (Porin 31HL) (Porin 31HM) [MASS=30641]    | 1.00 | 10.99 | 1.51 | 0.05 | 13 | 2 | 1 | YQIDPDAC[330]FSAK                      | 3 |
|                                                                                                                                                                                                          |      |       |      |      |    |   | 2 | EHINLGC[339]DMDFDIAGPSIR               | 1 |
|                                                                                                                                                                                                          |      |       |      |      |    |   | 2 | EHINLGC[339]DM[147]DFDIAGPSIR          | 2 |
| VDAC2_HUMAN (P45880) Voltage-dependent anion-selective channel protein 2 (VDAC-2) (hVDAC2) (Outer mitochondrial membrane protein porin 2) [MASS=38092]                                                   | 1.00 | 18.73 | 1.61 | 0.02 | 5  | 4 | 2 | YKWC[330]EYGLTFTEK                     | 1 |
|                                                                                                                                                                                                          |      |       |      |      |    |   | 2 | WNTDNTLGTEIAIEDQIC[330]QGLK            | 1 |
|                                                                                                                                                                                                          |      |       |      |      |    |   | 2 | WNTDNTLGTEIAIEDQIC[339]QGLK            | 1 |
| VDAC3_HUMAN (Q9Y277) Voltage-dependent anion-selective channel protein 3 (VDAC-3) (hVDAC3) (Outer mitochondrial membrane protein porin 3) [MASS=30658]                                                   | 1.00 | 10.95 | 1.69 | 0.03 | 5  | 2 | 2 | SC[339]SGVEFSTSGSSNTDTGK               | 1 |
|                                                                                                                                                                                                          |      |       |      |      |    |   | 2 | WC[339]EYGLTFTEK                       | 1 |
|                                                                                                                                                                                                          |      |       |      |      |    |   | 2 | WC[330]EYGLTFTEK                       | 1 |
| VILI_HUMAN (P09327) Villin-1 [MASS=92563]                                                                                                                                                                | *    | 3.51  | *    | *    | *  | 1 | 1 | VC[339]NYGLTFTQK                       | 1 |
|                                                                                                                                                                                                          |      |       |      |      |    |   | 3 | MC[330]NTPTYC[330]DLGKAAKDVFNK         | 1 |
|                                                                                                                                                                                                          |      |       |      |      |    |   | 2 | VC[339]NYGLTFTQK                       | 2 |
| VINC_HUMAN (P18206) Vinculin (Metavinculin) [MASS=123667]                                                                                                                                                | *    | 8.91  | *    | *    | *  | 5 | 2 | VC[330]NYGLTFTQK                       | 2 |
|                                                                                                                                                                                                          |      |       |      |      |    |   | 2 | TEKQVVVEGQEPANFWMALGGKAPYANTK          | 1 |
|                                                                                                                                                                                                          |      |       |      |      |    |   | 2 | ASDEVTRLAKEVAK                         | 1 |
|                                                                                                                                                                                                          |      |       |      |      |    |   | 2 | AASDELSKTISPM[147]VM[147]DAK           | 1 |
|                                                                                                                                                                                                          |      |       |      |      |    |   | 2 | ERREILGTC[330]K                        | 1 |
|                                                                                                                                                                                                          |      |       |      |      |    |   | 3 | C[339]DRVDQLTAQLADLAARGEESPQAR         | 1 |
|                                                                                                                                                                                                          |      |       |      |      |    |   | 2 | DMPPAFIKVENAC[330]TKLVQAAQMLQSDPYVSPAR | 1 |

|                                                                                                                                                                                                                                                                             |      |       |      |      |   |   |                                                                                        |                           |   |
|-----------------------------------------------------------------------------------------------------------------------------------------------------------------------------------------------------------------------------------------------------------------------------|------|-------|------|------|---|---|----------------------------------------------------------------------------------------|---------------------------|---|
| VIPR2_HUMAN (P41587) Vasoactive intestinal polypeptide receptor 2 precursor (VIP-R-2) (Pituitary adenylate cyclase-activating polypeptide type III receptor) (PACAP type III receptor) (PACAP-R-3) (Helodermin-preferring VIP receptor) [MASS=49478]                        | *    | 5.94  | *    | *    | * | 1 | 2                                                                                      | STLLLIPLFGVHYMVFVFPISISSK | 1 |
| VISL1_HUMAN (P62760) Visinin-like protein 1 (VILIP) (Hippocalcin-like protein 3) (HLP3) [MASS=22011]                                                                                                                                                                        | 0.95 | 14.74 | 1.05 | 0.00 | 1 | 2 | 2 GFLKDC[339]PSGR<br>2 LNWAFNM[147]YDLGDGDKITR                                         | 1<br>1                    |   |
| VPP1_HUMAN (Q93050) Vacuolar proton translocating ATPase 116 kDa subunit a isoform 1 (V-ATPase 116 kDa isoform a1) (Clathrin-coated vesicle/synaptic vesicle proton pump 116 kDa subunit) (Vacuolar proton pump subunit 1) (Vacuolar adenosine triphosphatase [MASS=96412]) | 0.95 | 1.55  | 0.74 | 0.00 | 1 | 1 | 2 ASLYPC[330]PETPQER                                                                   | 1                         |   |
| VPS16_HUMAN (Q9H269) Vacuolar protein sorting 16 (hVPS16) [MASS=94693]                                                                                                                                                                                                      | *    | 2.26  | *    | *    | * | 1 | 2 LLEYEPRSGEQVPLLLKM[147]K                                                             | 1                         |   |
| VWF_HUMAN (P04275) Von Willebrand factor precursor (vWF) [Contains: Von Willebrand antigen II] [MASS=309298]                                                                                                                                                                | *    | 1.88  | *    | *    | * | 3 | 3 DETHFEVVESGRYIILLGK<br>3 GLRPSC[330]PNSQSPVK<br>2 C[330]LPTAC[330]TIQLRGGQIM[147]TLK | 1<br>1<br>1               |   |
| WBS18_HUMAN (Q96LL9) Williams-Beuren syndrome chromosome region 18 protein [MASS=25961]                                                                                                                                                                                     | 0.00 | 9.73  | 0.46 | 0.00 | 1 | 1 | 3 QC[330]FLYHPDRNSGSAEAAERFTR                                                          | 1                         |   |
| WDR7_HUMAN (Q9Y4E6) WD repeat protein 7 (TGF-beta resistance-associated protein TRAG) (Rabconnectin-3 beta) [MASS=163809]                                                                                                                                                   | *    | 0.40  | *    | *    | * | 1 | 2 FFYGC[339]R                                                                          | 1                         |   |
| WSB1_HUMAN (Q9Y6I7) WD repeat and SOCS box-containing protein 1 (WSB-1) (SOCS box-containing WD protein SWIP-1) [MASS=47432]                                                                                                                                                | 0.00 | 10.93 | 1.01 | 0.00 | 1 | 3 | 2 C[339]GRENWTVAFAPDGSYFAWSQGHR<br>2 VWDLKDDGNMMK<br>2 DDGNM[147]M[147]KVLRL           | 1<br>1<br>1               |   |
| XPO1_HUMAN (O14980) Exportin-1 (Exp1) (Chromosome region maintenance 1 protein homolog) [MASS=123385]                                                                                                                                                                       | *    | 2.15  | *    | *    | * | 1 | 3 MAKPEEVLVENDQGEVVREFMK                                                               | 1                         |   |



|                                                                                                                                                                                                                                                                              |      |      |      |      |   |   |             |                                                                                   |             |
|------------------------------------------------------------------------------------------------------------------------------------------------------------------------------------------------------------------------------------------------------------------------------|------|------|------|------|---|---|-------------|-----------------------------------------------------------------------------------|-------------|
| XPP2_HUMAN (O43895) Xaa-Pro aminopeptidase 2 precursor (EC 3.4.11.9) (X-Pro aminopeptidase 2) (Membrane-bound aminopeptidase P) (Membrane-bound APP) (Membrane-bound AmP) (mAmP) (Aminoacylproline aminopeptidase) [MASS=75624]                                              | 0.23 | 3.56 | 0.24 | 0.00 | 1 | 1 | 2           | NC[330]STNPPYLPVTVVNTTM[147]SLTALR                                                | 1           |
| YLPM1_HUMAN (P49750) YLP motif-containing protein 1 (Nuclear protein ZAP3) (ZAP113) [MASS=219984]                                                                                                                                                                            | *    | 1.18 | *    | *    | * | 2 | 1<br>3      | PPPPMGK<br>EQHLAQLQQLQQM[147]HQK                                                  | 1<br>1      |
| YYY1_HUMAN (P49646) Very very hypothetical protein RMSA-1 [MASS=48240]                                                                                                                                                                                                       | *    | 4.31 | *    | *    | * | 1 | 2           | WLIWEAKAGESLEVRSSR                                                                | 1           |
| Z3H7A_HUMAN (Q8IWR0) Zinc finger CCCH-type domain-containing protein 7A [MASS=110537]                                                                                                                                                                                        | 0.00 | 4.53 | 0.98 | 0.00 | 1 | 2 | 3<br>2      | AYDAVAKC[330]SLAVPQDEHVIKLTQELAQK<br>QMPLQFDLC[330]NHIASGK                        | 1<br>1      |
| Z585A_HUMAN (Q6P3V2) Zinc finger protein 585A [MASS=87988]                                                                                                                                                                                                                   | 0.00 | 6.24 | 0.25 | 0.00 | 1 | 3 | 2<br>2<br>3 | IHTGERHHEC[339]TDC[339]GKAFTQK<br>LWDHNQC[330]RKILSYK<br>QYEC[339]HEC[339]GKAFNQK | 1<br>1<br>1 |
| ZBT24_HUMAN (O43167) Zinc finger and BTB domain-containing protein 24 (Zinc finger protein 450) [MASS=78282]                                                                                                                                                                 | 0.00 | 2.30 | 1.38 | 0.00 | 1 | 1 | 2           | GFLC[339]DITLIVENVHFR                                                             | 1           |
| ZBTB2_HUMAN (Q8N680) Zinc finger and BTB domain-containing protein 2 [MASS=57336]                                                                                                                                                                                            | *    | 7.78 | *    | *    | * | 2 | 3<br>2      | AHKSVLASFSNYFK<br>QTLELC[330]TFEEGSQM[147]DNM[147]LVQTNKPYK                       | 1<br>1      |
| ZBTB9_HUMAN (Q96C00) Zinc finger and BTB domain-containing protein 9 [MASS=50602]                                                                                                                                                                                            | *    | 2.96 | *    | *    | * | 1 | 2           | EEISGSGTQPGGAK                                                                    | 1           |
| ZCHC8_HUMAN (Q6NZY4) Zinc finger CCHC domain-containing protein 8 [MASS=78577]                                                                                                                                                                                               | *    | 2.55 | *    | *    | * | 1 | 2           | KEYMDAC[330]GEANNQNFQQR                                                           | 1           |
| ZDH13_HUMAN (Q8IUH4) Probable palmitoyltransferase ZDHHC13 (EC 2.3.1.-) (Zinc finger DHHC domain-containing protein 13) (DHHC-13) (Huntingtin-interacting protein 14-related protein) (HIP14-related protein) (Huntingtin-interacting protein HIP3RP) (Putativ [MASS=70888]) | *    | 6.91 | *    | *    | * | 2 | 2<br>3      | ELANAREALPLIEDSSNC[330]DIVK<br>GETPLDM[147]ALQNKQLIIHMLK                          | 2<br>1      |

|                                                                                                                                                                                                                                                               |      |      |      |      |   |   |   |                                       |   |
|---------------------------------------------------------------------------------------------------------------------------------------------------------------------------------------------------------------------------------------------------------------|------|------|------|------|---|---|---|---------------------------------------|---|
| ZEP1_HUMAN (P15822) Zinc finger protein 40 (Human immunodeficiency virus type I enhancer-binding protein 1) (HIV-EP1) (Major histocompatibility complex-binding protein 1) (MBP-1) (Positive regulatory domain II-binding factor 1) (PRDII-BF1) [MASS=297217] | *    | 2.36 | *    | *    | * | 4 | 2 | DENGAVC[330]ATDVRPLEALSSR             | 1 |
|                                                                                                                                                                                                                                                               |      |      |      |      |   |   | 2 | KVLNPPAPAGDHAR                        | 1 |
|                                                                                                                                                                                                                                                               |      |      |      |      |   |   | 2 | PLGSQVQKVPSSFMLPIR                    | 1 |
|                                                                                                                                                                                                                                                               |      |      |      |      |   |   | 3 | QTSVASANQVSR                          | 1 |
| ZFN2B_HUMAN (Q8WV99) AN1-type zinc finger protein 2B [MASS=28022]                                                                                                                                                                                             | 0.00 | 3.89 | 0.72 | 0.00 | 1 | 1 | 2 | SSKPSNC[330]SLC[330]                  | 1 |
| ZFP1_HUMAN (Q6P2D0) Zinc finger protein 1 homolog (Zfp-1) [MASS=47516]                                                                                                                                                                                        | *    | 5.16 | *    | *    | * | 1 | 3 | SYAGKQTDEC[330]NEFGKALLYLK            | 1 |
| ZFP28_HUMAN (Q8NHY6) Zinc finger protein 28 homolog (Zfp-28) (Krueppel-like zinc finger factor X6) [MASS=98704]                                                                                                                                               | *    | 2.53 | *    | *    | * | 1 | 3 | PFEC[330]AEC[339]GKSFSISSQLATHQR      | 1 |
| ZFY28_HUMAN (Q9HCC9) Zinc finger FYVE domain-containing protein 28 [MASS=96500]                                                                                                                                                                               | 0.00 | 4.96 | 0.67 | 0.00 | 1 | 3 | 2 | KVEDM[147]SELFR                       | 1 |
|                                                                                                                                                                                                                                                               |      |      |      |      |   |   | 2 | EYYVQQEVIVLFC[330]ETVER               | 1 |
|                                                                                                                                                                                                                                                               |      |      |      |      |   |   | 2 | ELESMAM[147]RPLAKELTR                 | 1 |
|                                                                                                                                                                                                                                                               |      |      |      |      |   |   | 3 | AKMESSVSVVSVVHDTSTELLSPKK             | 1 |
| ZMYM1_HUMAN (Q5SVZ6) Zinc finger MYM-type protein 1 [MASS=128716]                                                                                                                                                                                             | *    | 5.78 | *    | *    | * | 4 | 3 | ELQNKTIIDIFSLSSK                      | 1 |
|                                                                                                                                                                                                                                                               |      |      |      |      |   |   | 2 | IKQISELLFK                            | 1 |
|                                                                                                                                                                                                                                                               |      |      |      |      |   |   | 3 | HEKSEM[147]HLKSLEFWR                  | 1 |
| ZN141_HUMAN (Q15928) Zinc finger protein 141 [MASS=55249]                                                                                                                                                                                                     | *    | 7.17 | *    | *    | * | 2 | 3 | LQKGGYNEFNEC[339]LSTTQSKILQC[330]K    | 1 |
|                                                                                                                                                                                                                                                               |      |      |      |      |   |   | 2 | WSLIFNEHKR                            | 1 |
| ZN142_HUMAN (P52746) Zinc finger protein 142 (HA4654) [MASS=187865]                                                                                                                                                                                           | 0.00 | 1.48 | 3.16 | 0.00 | 1 | 1 | 3 | RHPEPAQPAPGSPAETTEGPLHC[330]SR        | 1 |
| ZN236_HUMAN (Q9UL36) Zinc finger protein 236 [MASS=203659]                                                                                                                                                                                                    | *    | 2.38 | *    | *    | * | 3 | 2 | HM[147]KTHR                           | 1 |
|                                                                                                                                                                                                                                                               |      |      |      |      |   |   | 3 | C[339]QYC[339]MKSFSTSGSLKVHIR         | 1 |
|                                                                                                                                                                                                                                                               |      |      |      |      |   |   | 2 | C[330]DEC[330]GKSFTVKSTLDC[330]HVK    | 1 |
| ZN273_HUMAN (Q14593) Zinc finger protein 273 (Zinc finger protein HZF9) [MASS=58045]                                                                                                                                                                          | *    | 3.17 | *    | *    | * | 1 | 3 | C[339]KTC[330]GKAFNQFSNLTK            | 1 |
| ZN366_HUMAN (Q8N895) Zinc finger protein 366 [MASS=85107]                                                                                                                                                                                                     | 0.00 | 4.03 | 0.98 | 0.00 | 1 | 2 | 2 | DEC[330]LSLRAFQSTR                    | 1 |
|                                                                                                                                                                                                                                                               |      |      |      |      |   |   | 2 | VKHGVM[147]ERGLHSQGLGR                | 1 |
|                                                                                                                                                                                                                                                               |      |      |      |      |   |   | 3 | GQGATFVETDSPFTAAALAEPLVKEKPLR         | 1 |
| ZN407_HUMAN (Q9C0G0) Zinc finger protein 407 (Fragment) [MASS=126979]                                                                                                                                                                                         | *    | 4.12 | *    | *    | * | 2 | 3 | M[147]YNC[330]PKC[330]DYGTVNPVEFR     | 3 |
| ZN430_HUMAN (Q9H8G1) Zinc finger protein 430 [MASS=66346]                                                                                                                                                                                                     | *    | 5.26 | *    | *    | * | 2 | 2 | FSYLTCHK                              | 1 |
|                                                                                                                                                                                                                                                               |      |      |      |      |   |   | 3 | C[339]GHEDLQLRTGC[339]RSVDEC[339]NLHK | 1 |
| ZN443_HUMAN (Q9Y2A4) Zinc finger protein 443 (Krueppel-type zinc finger protein ZK1) [MASS=77547]                                                                                                                                                             | 0.00 | 7.45 | *    | *    | * | 3 | 2 | SSFRSHMIM[147]HTGDGPHKC[339]K         | 1 |
|                                                                                                                                                                                                                                                               |      |      |      |      |   |   | 3 | QC[330]SKAFPDSSSC[339]LIHER           | 1 |
|                                                                                                                                                                                                                                                               |      |      |      |      |   |   | 3 | EC[339]GKAFSWLTC[330]FLR              | 1 |

|                                                                                                          |      |      |       |      |   |   |   |                                      |    |
|----------------------------------------------------------------------------------------------------------|------|------|-------|------|---|---|---|--------------------------------------|----|
| ZN462_HUMAN (Q96JM2) Zinc finger protein 462 [MASS=161529]                                               | *    | 5.38 | *     | *    | * | 4 | 3 | VLMSM[147]QGLRSHERSHLALAMFTR         | 1  |
|                                                                                                          |      |      |       |      |   |   | 3 | IVSLLSSHSHHSSQK                      | 1  |
|                                                                                                          |      |      |       |      |   |   | 3 | FSDHGAALNTEK                         | 1  |
|                                                                                                          |      |      |       |      |   |   | 3 | DASGALVGRVDGEHC[330]LLDGM[147]LEDETR | 1  |
| ZN502_HUMAN (Q8TBZ5) Zinc finger protein 502 [MASS=62920]                                                | *    | 4.60 | *     | *    | * | 1 | 3 | C[330]NEC[339]GKTFTQSSSLTQHQRTHHTGER | 1  |
| ZN519_HUMAN (Q8TB69) Zinc finger protein 519 [MASS=63021]                                                | 0.00 | 2.04 | 12.62 | 0.00 | 1 | 1 | 2 | C[339]LDPAQQNLYR                     | 1  |
| ZN555_HUMAN (Q8NEP9) Zinc finger protein 555 [MASS=73062]                                                | 0.00 | 4.30 | 0.57  | 0.00 | 1 | 2 | 3 | EC[330]GEAFSYSSAFRR                  | 1  |
|                                                                                                          |      |      |       |      |   |   | 2 | QC[330]GKAFSLSAC[339]FR              | 1  |
| ZN596_HUMAN (Q8TC21) Zinc finger protein 596 [MASS=57907]                                                | *    | 8.43 | *     | *    | * | 2 | 3 | MTFEDIIVDFTEEWALLDTSQRK              | 1  |
|                                                                                                          |      |      |       |      |   |   | 2 | PYEC[330]HVC[339]GKAFTESDLR          | 1  |
|                                                                                                          |      |      |       |      |   |   | 3 | VFSC[339]GSTLETHK                    | 11 |
| ZN600_HUMAN (Q6ZNG1) Zinc finger protein 600 [MASS=83157]                                                | *    | 1.66 | *     | *    | * | 1 |   |                                      |    |
| ZN605_HUMAN (Q86T29) Zinc finger protein 605 [MASS=74376]                                                | *    | 2.18 | *     | *    | * | 1 | 3 | PQLLRHQRIHTGEK                       | 1  |
| ZN645_HUMAN (Q8N7E2) Zinc finger protein 645 [MASS=48784]                                                | *    | 2.35 | *     | *    | * | 1 | 2 | KQVTSASLEK                           | 1  |
| ZN680_HUMAN (Q8NEM1) Zinc finger protein 680 [MASS=61741]                                                | 0.00 | 6.04 | 3.57  | 0.00 | 1 | 2 | 2 | C[339]GHENLQLRISC[339]K              | 1  |
|                                                                                                          |      |      |       |      |   |   | 3 | C[330]EEC[339]GKAFIQSSNLTEHMR        | 1  |
|                                                                                                          |      |      |       |      |   |   | 2 | AFTRSTTLPVHERHTGTVNADEC[330]K        | 1  |
| ZNF20_HUMAN (P17024) Zinc finger protein 20 (Zinc finger protein KOX13) [MASS=61567]                     | *    | 5.83 | *     | *    | * | 2 | 1 | NLTSVGK                              | 3  |
|                                                                                                          |      |      |       |      |   |   |   |                                      |    |
| ZNF43_HUMAN (P17038) Zinc finger protein 43 (Zinc protein HTF6) (Zinc finger protein KOX27) [MASS=93487] | *    | 2.62 | *     | *    | * | 1 | 3 | EC[330]GKSFC[330]M[147]LPHLAQHKKIHTR | 1  |
| ZNT3_HUMAN (Q99726) Zinc transporter 3 (ZnT-3) (Solute carrier family 30 member 3) [MASS=41944]          | *    | 6.96 | *     | *    | * | 1 | 3 | AADPISTFLFSIC[330]ALGSTAPTLRDVLR     | 1  |
| ZSWM4_HUMAN (Q9H7M6) Zinc finger SWIM domain-containing protein 4 [MASS=110167]                          | *    | 1.42 | *     | *    | * | 2 | 1 | PLGADR                               | 1  |
|                                                                                                          |      |      |       |      |   |   | 2 | VREMLRM[147]R                        | 1  |

**Table 10. LAD Mitochondrial Study  
Protein Summary**

| Description                                                                                                                                                                                                                    | Experiment1   |                  | Experiment2   |                  | Experiment3   |                  | Count | Mean | SEM  |
|--------------------------------------------------------------------------------------------------------------------------------------------------------------------------------------------------------------------------------|---------------|------------------|---------------|------------------|---------------|------------------|-------|------|------|
|                                                                                                                                                                                                                                | Protein Score | XPress H2L Ratio | Protein Score | XPress H2L Ratio | Protein Score | XPress H2L Ratio |       |      |      |
| AATM_HUMAN (P00505) Aspartate aminotransferase, mitochondrial precursor (EC 2.6.1.1) (Transaminase A) (Glutamate oxaloacetate transaminase 2) [MASS=47475]                                                                     | 1.00          | 1.41             | 1.00          | 1.38             | 1.00          | 1.13             | 3     | 1.31 | 0.09 |
| ACPM_HUMAN (O14561) Acyl carrier protein, mitochondrial precursor (ACP) (NADH-ubiquinone oxidoreductase 9.6 kDa subunit) (CI-SDAP) [MASS=17417]                                                                                | 1.00          | 1.16             | 1.00          | 1.45             | 1.00          | 1.45             | 3     | 1.35 | 0.10 |
| ACTB_HUMAN (P60709) Actin, cytoplasmic 1 (Beta-actin) [MASS=41736]                                                                                                                                                             | 1.00          | 1.20             | 1.00          | 1.09             | 1.00          | 0.82             | 3     | 1.04 | 0.11 |
| ADT1_HUMAN (P12235) ADP/ATP translocase 1 (Adenine nucleotide translocator 1) (ANT 1) (ADP,ATP carrier protein 1) (Solute carrier family 25 member 4) (ADP,ATP carrier protein, heart/skeletal muscle isoform T1) [MASS=32933] | 1.00          | 1.23             | 1.00          | 1.21             | 1.00          | 1.60             | 3     | 1.35 | 0.13 |
| AT1A1_HUMAN (P05023) Sodium/potassium-transporting ATPase alpha-1 chain precursor (EC 3.6.3.9) (Sodium pump 1) (Na+/K+ ATPase 1) [MASS=112895]                                                                                 | 1.00          | 1.05             | 1.00          | 0.95             | 1.00          | 0.88             | 3     | 0.96 | 0.05 |
| AT1A3_HUMAN (P13637) Sodium/potassium-transporting ATPase alpha-3 chain (EC 3.6.3.9) (Sodium pump 3) (Na+/K+ ATPase 3) (Alpha(III)) [MASS=111734]                                                                              | 1.00          | 1.07             | 1.00          | 0.97             | 1.00          | 0.93             | 3     | 0.99 | 0.04 |
| AT1B1_HUMAN (P05026) Sodium/potassium-transporting ATPase subunit beta-1 (Sodium/potassium-dependent ATPase beta-1 subunit) [MASS=35061]                                                                                       | 1.00          | 0.98             | 1.00          | 0.89             | 1.00          | 1.25             | 3     | 1.04 | 0.11 |
| ATPA_HUMAN (P25705) ATP synthase alpha chain, mitochondrial precursor (EC 3.6.3.14) [MASS=59750]                                                                                                                               | 1.00          | 1.12             | 1.00          | 0.88             | 1.00          | 1.05             | 3     | 1.02 | 0.07 |
| ATPG_HUMAN (P36542) ATP synthase gamma chain, mitochondrial precursor (EC 3.6.3.14) [MASS=32996]                                                                                                                               | 1.00          | 1.50             | 1.00          | 1.06             | 1.00          | 1.20             | 3     | 1.25 | 0.13 |
| CJ070_HUMAN (Q9NZ45) Protein C10orf70 [MASS=12199]                                                                                                                                                                             | 1.00          | 1.25             | 1.00          | 1.30             | 1.00          | 1.16             | 3     | 1.24 | 0.04 |
| CN37_HUMAN (P09543) 2',3'-cyclic-nucleotide 3'-phosphodiesterase (EC 3.1.4.37) (CNP) (CNPase) [MASS=47578]                                                                                                                     | 1.00          | 1.06             | 1.00          | 0.89             | 1.00          | 0.94             | 3     | 0.96 | 0.05 |
| COX7C_HUMAN (P15954) Cytochrome c oxidase polypeptide VIIc, mitochondrial precursor (EC 1.9.3.1) [MASS=7245]                                                                                                                   | 1.00          | 1.10             | 1.00          | 1.07             | 1.00          | 1.26             | 3     | 1.14 | 0.06 |

|                                                                                                                                                                                                                                                              |      |      |      |      |      |      |   |      |      |
|--------------------------------------------------------------------------------------------------------------------------------------------------------------------------------------------------------------------------------------------------------------|------|------|------|------|------|------|---|------|------|
| CY1_HUMAN (P08574) Cytochrome c1, heme protein, mitochondrial precursor (Cytochrome c-1) [MASS=35390]                                                                                                                                                        | 1.00 | 1.19 | 1.00 | 1.22 | 1.00 | 1.36 | 3 | 1.26 | 0.05 |
| DHE3_HUMAN (P00367) Glutamate dehydrogenase 1, mitochondrial precursor (EC 1.4.1.3) (GDH) [MASS=61397]                                                                                                                                                       | 1.00 | 1.32 | 1.00 | 1.21 | 1.00 | 1.22 | 3 | 1.25 | 0.04 |
| DHSA_HUMAN (P31040) Succinate dehydrogenase [ubiquinone] flavoprotein subunit, mitochondrial precursor (EC 1.3.5.1) (Fp) (Flavoprotein subunit of complex II) [MASS=72691]                                                                                   | 1.00 | 1.53 | 1.00 | 1.13 | 1.00 | 1.12 | 3 | 1.26 | 0.14 |
| DHSB_HUMAN (P21912) Succinate dehydrogenase [ubiquinone] iron-sulfur protein, mitochondrial precursor (EC 1.3.5.1) (Ip) (Iron-sulfur subunit of complex II) [MASS=31630]                                                                                     | 1.00 | 1.38 | 1.00 | 1.09 | 1.00 | 1.38 | 3 | 1.28 | 0.10 |
| EAA2_HUMAN (P43004) Excitatory amino acid transporter 2 (Sodium-dependent glutamate/aspartate transporter 2) [MASS=62104]                                                                                                                                    | 1.00 | 0.84 | 1.00 | 0.91 | 1.00 | 0.74 | 3 | 0.83 | 0.05 |
| ECHA_HUMAN (P40939) Trifunctional enzyme subunit alpha, mitochondrial precursor (TP-alpha) (78 kDa gastrin-binding protein) [Includes: Long-chain enoyl-CoA hydratase (EC 4.2.1.17); Long chain 3-hydroxyacyl-CoA dehydrogenase (EC 1.1.1.211)] [MASS=82999] | 1.00 | 0.94 | 1.00 | 1.18 | 1.00 | 1.47 | 3 | 1.20 | 0.15 |
| EFTU_HUMAN (P49411) Elongation factor Tu, mitochondrial precursor (EF-Tu) (P43) [MASS=49541]                                                                                                                                                                 | 1.00 | 1.23 | 1.00 | 1.13 | 1.00 | 1.20 | 3 | 1.19 | 0.03 |
| GBB1_HUMAN (P62873) Guanine nucleotide-binding protein G(I)/G(S)/G(T) subunit beta 1 (Transducin beta chain 1) [MASS=37246]                                                                                                                                  | 1.00 | 1.00 | 1.00 | 0.99 | 1.00 | 0.97 | 3 | 0.99 | 0.01 |
| GHC1_HUMAN (Q9H936) Mitochondrial glutamate carrier 1 (GC-1) (Glutamate/H(+) symporter 1) (Solute carrier family 25 member 22) [MASS=34470]                                                                                                                  | 1.00 | 1.34 | 1.00 | 1.04 | 1.00 | 1.01 | 3 | 1.13 | 0.11 |
| GLSK_HUMAN (O94925) Glutaminase kidney isoform, mitochondrial precursor (EC 3.5.1.2) (GLS) (L-glutamine amidohydrolase) (K-glutaminase) [MASS=73461]                                                                                                         | 1.00 | 1.55 | 1.00 | 1.28 | 1.00 | 1.49 | 3 | 1.44 | 0.08 |
| HBB_HUMAN (P68871) Hemoglobin subunit beta (Hemoglobin beta chain) (Beta-globin) [MASS=15867]                                                                                                                                                                | 1.00 | 1.02 | 1.00 | 1.24 | 1.00 | 0.82 | 3 | 1.03 | 0.12 |
| HXK1_HUMAN (P19367) Hexokinase-1 (EC 2.7.1.1) (Hexokinase type I) (HK I) (Brain form hexokinase) [MASS=102484]                                                                                                                                               | 1.00 | 1.52 | 1.00 | 1.21 | 1.00 | 1.27 | 3 | 1.33 | 0.09 |
| IDH3A_HUMAN (P50213) Isocitrate dehydrogenase [NAD] subunit alpha, mitochondrial precursor (EC 1.1.1.41) (Isocitric dehydrogenase) (NAD(+)-specific ICDH) [MASS=39591]                                                                                       | 1.00 | 1.42 | 1.00 | 1.36 | 1.00 | 1.34 | 3 | 1.37 | 0.02 |
| IDHP_HUMAN (P48735) Isocitrate dehydrogenase [NADP], mitochondrial precursor (EC 1.1.1.42) (Oxalosuccinate decarboxylase) (IDH) (NADP(+)-specific ICDH) (IDP) (ICD-M) [MASS=50909]                                                                           | 1.00 | 0.93 | 1.00 | 1.02 | 1.00 | 1.30 | 3 | 1.08 | 0.11 |

|                                                                                                                                                                                                                                 |      |      |      |      |      |      |   |      |      |
|---------------------------------------------------------------------------------------------------------------------------------------------------------------------------------------------------------------------------------|------|------|------|------|------|------|---|------|------|
| KCC2A_HUMAN (Q9UQM7) Calcium/calmodulin-dependent protein kinase type II alpha chain (EC 2.7.11.17) (CaM-kinase II alpha chain) (CaM kinase II alpha subunit) (CaMK-II subunit alpha) [MASS=54029]                              | 1.00 | 1.31 | 1.00 | 1.00 | 1.00 | 1.15 | 3 | 1.15 | 0.09 |
| KCC2B_HUMAN (Q13554) Calcium/calmodulin-dependent protein kinase type II beta chain (EC 2.7.11.17) (CaM-kinase II beta chain) (CaM kinase II subunit beta) (CaMK-II subunit beta) [MASS=72726]                                  | 1.00 | 1.39 | 1.00 | 0.86 | 1.00 | 1.21 | 3 | 1.15 | 0.16 |
| KCRB_HUMAN (P12277) Creatine kinase B-type (EC 2.7.3.2) (Creatine kinase B chain) (B-CK) [MASS=42644]                                                                                                                           | 1.00 | 1.51 | 1.00 | 1.16 | 1.00 | 1.41 | 3 | 1.36 | 0.10 |
| KCRU_HUMAN (P12532) Creatine kinase, ubiquitous mitochondrial precursor (EC 2.7.3.2) (U-MtCK) (Mia-CK) (Acidic-type mitochondrial creatine kinase) [MASS=47036]                                                                 | 1.00 | 1.27 | 1.00 | 1.18 | 1.00 | 1.37 | 3 | 1.27 | 0.05 |
| MDHM_HUMAN (P40926) Malate dehydrogenase, mitochondrial precursor (EC 1.1.1.37) [MASS=35531]                                                                                                                                    | 1.00 | 1.39 | 1.00 | 1.32 | 1.00 | 1.33 | 3 | 1.35 | 0.02 |
| MGST3_HUMAN (O14880) Microsomal glutathione S-transferase 3 (EC 2.5.1.18) (Microsomal GST-3) (Microsomal GST-III) [MASS=16516]                                                                                                  | 1.00 | 1.46 | 1.00 | 1.20 | 1.00 | 1.29 | 3 | 1.32 | 0.08 |
| MYPR_HUMAN (P60201) Myelin proteolipid protein (PLP) (Lipophilin) [MASS=29946]                                                                                                                                                  | 1.00 | 1.26 | 1.00 | 0.98 | 1.00 | 0.94 | 3 | 1.06 | 0.10 |
| NDUA8_HUMAN (P51970) NADH dehydrogenase [ubiquinone] 1 alpha subcomplex subunit 8 (EC 1.6.5.3) (EC 1.6.99.3) (NADH-ubiquinone oxidoreductase 19 kDa subunit) (Complex I-19KD) (CI-19KD) (Complex I-PGIV) (CI-PGIV) [MASS=19974] | 1.00 | 1.43 | 1.00 | 1.14 | 1.00 | 1.15 | 3 | 1.24 | 0.10 |
| NDUAA_HUMAN (O95299) NADH dehydrogenase [ubiquinone] 1 alpha subcomplex subunit 10, mitochondrial precursor (EC 1.6.5.3) (EC 1.6.99.3) (NADH-ubiquinone oxidoreductase 42 kDa subunit) (Complex I-42KD) (CI-42KD) [MASS=40750]  | 1.00 | 1.36 | 1.00 | 0.87 | 1.00 | 1.58 | 3 | 1.27 | 0.21 |
| NDUB7_HUMAN (P17568) NADH dehydrogenase [ubiquinone] 1 beta subcomplex subunit 7 (EC 1.6.5.3) (EC 1.6.99.3) (NADH-ubiquinone oxidoreductase B18 subunit) (Complex I-B18) (CI-B18) (Cell adhesion protein SQM1) [MASS=16271]     | 1.00 | 1.35 | 1.00 | 1.14 | 1.00 | 1.26 | 3 | 1.25 | 0.06 |
| NNTM_HUMAN (Q13423) NAD(P) transhydrogenase, mitochondrial precursor (EC 1.6.1.2) (Pyridine nucleotide transhydrogenase) (Nicotinamide nucleotide transhydrogenase) [MASS=113895]                                               | 1.00 | 0.85 | 1.00 | 1.01 | 1.00 | 1.08 | 3 | 0.98 | 0.07 |
| NSF_HUMAN (P46459) Vesicle-fusing ATPase (EC 3.6.4.6) (Vesicular-fusion protein NSF) (N-ethylmaleimide sensitive fusion protein) (NEM-sensitive fusion protein) [MASS=82654]                                                    | 1.00 | 1.03 | 1.00 | 1.07 | 1.00 | 1.17 | 3 | 1.09 | 0.04 |
| NUAM_HUMAN (P28331) NADH-ubiquinone oxidoreductase 75 kDa subunit, mitochondrial precursor (EC 1.6.5.3) (EC 1.6.99.3) (Complex I-75Kd) (CI-75Kd) [MASS=79467]                                                                   | 1.00 | 1.31 | 1.00 | 1.15 | 1.00 | 1.30 | 3 | 1.25 | 0.05 |

|                                                                                                                                                                                                                                                                             |      |      |      |      |      |      |   |      |      |
|-----------------------------------------------------------------------------------------------------------------------------------------------------------------------------------------------------------------------------------------------------------------------------|------|------|------|------|------|------|---|------|------|
| NUBM_HUMAN (P49821) NADH-ubiquinone oxidoreductase 51 kDa subunit, mitochondrial precursor (EC 1.6.5.3) (EC 1.6.99.3) (Complex I-51KD) (CI-51KD) (NADH dehydrogenase flavoprotein 1) [MASS=50817]                                                                           | 1.00 | 1.79 | 1.00 | 1.08 | 1.00 | 1.13 | 3 | 1.33 | 0.23 |
| PARK7_HUMAN (Q99497) Protein DJ-1 (Oncogene DJ1) [MASS=19891]                                                                                                                                                                                                               | 1.00 | 1.09 | 1.00 | 0.88 | 1.00 | 0.99 | 3 | 0.99 | 0.06 |
| PRDX5_HUMAN (P30044) Peroxiredoxin-5, mitochondrial precursor (EC 1.11.1.15) (Prx-V) (Peroxisomal antioxidant enzyme) (PLP) (Thioredoxin reductase) (Thioredoxin peroxidase PMP20) (Antioxidant enzyme B166) (AOEB166) (TPx type VI) (Liver tissue 2D-page spo [MASS=22026] | 1.00 | 0.86 | 1.00 | 1.44 | 1.00 | 1.09 | 3 | 1.13 | 0.17 |
| S10AB_HUMAN (P31949) Protein S100-A11 (S100 calcium-binding protein A11) (Protein S100C) (Calgizzarin) (MLN 70) [MASS=11740]                                                                                                                                                | 1.00 | 1.27 | 1.00 | 1.19 | 1.00 | 1.28 | 3 | 1.25 | 0.03 |
| SAM50_HUMAN (Q9Y512) Sorting and assembly machinery component 50 homolog [MASS=51962]                                                                                                                                                                                       | 1.00 | 1.19 | 1.00 | 1.29 | 1.00 | 1.18 | 3 | 1.22 | 0.04 |
| SAP_HUMAN (P07602) Proactivator polypeptide precursor [Contains: Saposin A (Protein A); Saposin B-Val; Saposin B (Sphingolipid activator protein 1) (SAP-1) (Cerebroside sulfate activator) (CSAct) (Dispersin) (Sulfatide/GM1 activator); Saposin C (Co-beta- [MASS=58112] | 1.00 | 1.11 | 1.00 | 1.14 | 1.00 | 1.06 | 3 | 1.10 | 0.02 |
| STXB1_HUMAN (P61764) Syntaxin-binding protein 1 (Unc-18 homolog) (Unc-18A) (Unc-18-1) (N-Sec1) (p67) [MASS=67568]                                                                                                                                                           | 1.00 | 1.31 | 1.00 | 0.93 | 1.00 | 1.01 | 3 | 1.08 | 0.12 |
| TBA1_HUMAN (P68366) Tubulin alpha-1 chain (Alpha-tubulin 1) (Testis-specific alpha-tubulin) (Tubulin H2-alpha) [MASS=49924]                                                                                                                                                 | 1.00 | 1.03 | 1.00 | 1.07 | 1.00 | 1.12 | 3 | 1.07 | 0.03 |
| TBA3_HUMAN (Q71U36) Tubulin alpha-3 chain (Alpha-tubulin 3) (Tubulin B-alpha-1) [MASS=50135]                                                                                                                                                                                | 1.00 | 1.13 | 1.00 | 1.14 | 1.00 | 1.14 | 3 | 1.14 | 0.00 |
| TBB2_HUMAN (P07437) Tubulin beta-2 chain [MASS=49671]                                                                                                                                                                                                                       | 1.00 | 1.29 | 1.00 | 1.11 | 1.00 | 0.90 | 3 | 1.10 | 0.11 |
| UCRH_HUMAN (P07919) Ubiquinol-cytochrome c reductase complex 11 kDa protein, mitochondrial precursor (EC 1.10.2.2) (Mitochondrial hinge protein) (Cytochrome C1, nonheme 11 kDa protein) (Complex III subunit VIII) [MASS=10739]                                            | 1.00 | 1.13 | 1.00 | 0.95 | 1.00 | 1.18 | 3 | 1.09 | 0.07 |
| UQCR1_HUMAN (P31930) Ubiquinol-cytochrome-c reductase complex core protein I, mitochondrial precursor (EC 1.10.2.2) [MASS=52645]                                                                                                                                            | 1.00 | 1.29 | 1.00 | 1.20 | 1.00 | 0.91 | 3 | 1.13 | 0.11 |
| UQCR2_HUMAN (P22695) Ubiquinol-cytochrome-c reductase complex core protein 2, mitochondrial precursor (EC 1.10.2.2) (Complex III subunit II) [MASS=48443]                                                                                                                   | 1.00 | 1.28 | 1.00 | 1.06 | 1.00 | 0.86 | 3 | 1.07 | 0.12 |

|                                                                                                                                                                                                                                                                             |      |      |      |      |      |      |   |      |      |
|-----------------------------------------------------------------------------------------------------------------------------------------------------------------------------------------------------------------------------------------------------------------------------|------|------|------|------|------|------|---|------|------|
| VDAC1_HUMAN (P21796) Voltage-dependent anion-selective channel protein 1 (VDAC-1) (hVDAC1) (Outer mitochondrial membrane protein porin 1) (Plasmalemmal porin) (Porin 31HL) (Porin 31HM) [MASS=30641]                                                                       | 1.00 | 2.16 | 1.00 | 1.03 | 1.00 | 1.09 | 3 | 1.43 | 0.37 |
| VDAC2_HUMAN (P45880) Voltage-dependent anion-selective channel protein 2 (VDAC-2) (hVDAC2) (Outer mitochondrial membrane protein porin 2) [MASS=38092]                                                                                                                      | 1.00 | 1.19 | 1.00 | 1.06 | 1.00 | 1.68 | 3 | 1.31 | 0.19 |
| ACON_HUMAN (Q99798) Aconitate hydratase, mitochondrial precursor (EC 4.2.1.3) (Citrate hydro-lyase) (Aconitase) [MASS=85425]                                                                                                                                                | 0.99 | 1.46 | 1.00 | 1.28 | 1.00 | 0.84 | 3 | 1.19 | 0.18 |
| C560_HUMAN (Q99643) Succinate dehydrogenase cytochrome b560 subunit, mitochondrial precursor (Integral membrane protein CII-3) (QPs1) (QPs-1) (Succinate dehydrogenase complex subunit C) (Succinate-ubiquinone oxidoreductase cytochrome B large subunit) (CY [MASS=18610] | 1.00 | 1.51 | 0.99 | 1.59 | 1.00 | 1.93 | 3 | 1.68 | 0.13 |
| CH60_HUMAN (P10809) 60 kDa heat shock protein, mitochondrial precursor (Hsp60) (60 kDa chaperonin) (CPN60) (Heat shock protein 60) (HSP-60) (Mitochondrial matrix protein P1) (P60 lymphocyte protein) (HuCHA60) [MASS=61054]                                               | 0.99 | 1.24 | 1.00 | 1.20 | 1.00 | 1.25 | 3 | 1.23 | 0.02 |
| CHCH3_HUMAN (Q9NX63) Coiled-coil-helix-coiled-coil-helix domain-containing protein 3 [MASS=26152]                                                                                                                                                                           | 0.99 | 1.33 | 1.00 | 1.09 | 1.00 | 0.89 | 3 | 1.10 | 0.13 |
| G3P_HUMAN (P04406) Glyceraldehyde-3-phosphate dehydrogenase (EC 1.2.1.12) (GAPDH) [MASS=35922]                                                                                                                                                                              | 1.00 | 0.86 | 0.99 | 0.94 | 1.00 | 0.86 | 3 | 0.89 | 0.03 |
| MTCH2_HUMAN (Q9Y6C9) Mitochondrial carrier homolog 2 (Met-induced mitochondrial protein) [MASS=33331]                                                                                                                                                                       | 1.00 | 0.96 | 0.99 | 1.09 | 1.00 | 0.89 | 3 | 0.98 | 0.06 |
| NUMM_HUMAN (O75380) NADH-ubiquinone oxidoreductase 13 kDa-A subunit, mitochondrial precursor (EC 1.6.5.3) (EC 1.6.99.3) (Complex I-13KD-A) (CI-13KD-A) [MASS=13712]                                                                                                         | 1.00 | 1.55 | 1.00 | 1.16 | 0.99 | 1.05 | 3 | 1.25 | 0.15 |
| SYPH_HUMAN (P08247) Synaptophysin (Major synaptic vesicle protein p38) [MASS=33845]                                                                                                                                                                                         | 1.00 | 1.05 | 1.00 | 1.01 | 0.99 | 0.76 | 3 | 0.94 | 0.09 |
| TOM70_HUMAN (O94826) Mitochondrial precursor proteins import receptor (Translocase of outer membrane TOM70) [MASS=67454]                                                                                                                                                    | 1.00 | 0.55 | 0.99 | 1.07 | 1.00 | 1.29 | 3 | 0.97 | 0.22 |
| AOFA_HUMAN (P21397) Amine oxidase [flavin-containing] A (EC 1.4.3.4) (Monoamine oxidase type A) (MAO-A) [MASS=59681]                                                                                                                                                        | 0.99 | 1.41 | 0.99 | 1.07 | 1.00 | 0.99 | 3 | 1.16 | 0.13 |
| RHOB_HUMAN (P62745) Rho-related GTP-binding protein RhoB precursor (H6) [MASS=22123]                                                                                                                                                                                        | 1.00 | 1.03 | 0.99 | 0.93 | 0.99 | 1.01 | 3 | 0.99 | 0.03 |
| ENOA_HUMAN (P06733) Alpha-enolase (EC 4.2.1.11) (2-phospho-D-glycerate hydro-lyase) (Non-neural enolase) (NNE) (Enolase 1) (Phosphopyruvate hydratase) (C-myc promoter-binding protein) (MBP-1) (MPB-1) (Plasminogen-binding protein) [MASS=47037]                          | 1.00 | 0.91 | 0.97 | 1.35 | 1.00 | 1.06 | 3 | 1.11 | 0.13 |



|                                                                                                                                                                                                                                                                             |      |      |      |      |      |      |   |      |      |
|-----------------------------------------------------------------------------------------------------------------------------------------------------------------------------------------------------------------------------------------------------------------------------|------|------|------|------|------|------|---|------|------|
| RHOA_HUMAN (P61586) Transforming protein RhoA precursor (H12) [MASS=21768]                                                                                                                                                                                                  | 0.99 | 1.17 | 0.98 | 1.09 | 1.00 | 0.87 | 3 | 1.04 | 0.09 |
| SYA_HUMAN (P49588) Alanyl-tRNA synthetase (EC 6.1.1.7) (Alanine--tRNA ligase) (AlaRS) (NY-REN-42 antigen) [MASS=106801]                                                                                                                                                     | 0.98 | 1.06 | 1.00 | 0.81 | 0.99 | 0.76 | 3 | 0.88 | 0.09 |
| CD59_HUMAN (P13987) CD59 glycoprotein precursor (Membrane attack complex inhibition factor) (MACIF) (MAC-inhibitory protein) (MAC-IP) (Protectin) (MEM43 antigen) (Membrane inhibitor of reactive lysis) (MIRL) (20 kDa homologous restriction factor) (HRF-20 [MASS=14177] | 1.00 | 0.74 | 1.00 | 0.80 | 0.96 | 0.94 | 3 | 0.83 | 0.06 |
| DLDH_HUMAN (P09622) Dihydrolipoyl dehydrogenase, mitochondrial precursor (EC 1.8.1.4) (Dihydrolipoamide dehydrogenase) (Glycine cleavage system L protein) [MASS=54150]                                                                                                     | 1.00 | 1.15 | 1.00 | 0.88 | 0.96 | 1.40 | 3 | 1.14 | 0.15 |
| ES1_HUMAN (P30042) ES1 protein homolog, mitochondrial precursor (Protein KNP-I) (Protein GT335) [MASS=28142]                                                                                                                                                                | 0.96 | 1.04 | 1.00 | 1.30 | 1.00 | 1.56 | 3 | 1.30 | 0.15 |
| ETFD_HUMAN (Q16134) Electron transfer flavoprotein-ubiquinone oxidoreductase, mitochondrial precursor (EC 1.5.5.1) (ETF-QO) (ETF-ubiquinone oxidoreductase) (ETF dehydrogenase) (Electron-transferring-flavoprotein dehydrogenase) [MASS=68507]                             | 1.00 | 1.64 | 0.96 | 0.93 | 1.00 | 1.09 | 3 | 1.22 | 0.22 |
| VDAC3_HUMAN (Q9Y277) Voltage-dependent anion-selective channel protein 3 (VDAC-3) (hVDAC3) (Outer mitochondrial membrane protein porin 3) [MASS=30658]                                                                                                                      | 0.99 | 4.60 | 0.99 | 1.45 | 0.98 | 1.09 | 3 | 2.38 | 1.11 |
| ALDH2_HUMAN (P05091) Aldehyde dehydrogenase, mitochondrial precursor (EC 1.2.1.3) (ALDH class 2) (ALDH1) (ALDH-E2) [MASS=56381]                                                                                                                                             | 0.96 | 1.20 | 0.98 | 1.26 | 1.00 | 1.05 | 3 | 1.17 | 0.06 |
| C1QBP_HUMAN (Q07021) Complement component 1 Q subcomponent-binding protein, mitochondrial precursor (Glycoprotein gC1qBP) (C1qBP) (GC1q-R protein) (Hyaluronan-binding protein 1) (Mitochondrial matrix protein p32) (p33) [MASS=31362]                                     | 1.00 | 1.53 | 1.00 | 1.68 | 0.94 | 1.55 | 3 | 1.59 | 0.05 |
| KPYM_HUMAN (P14618) Pyruvate kinase isozymes M1/M2 (EC 2.7.1.40) (Pyruvate kinase muscle isozyme) (Cytosolic thyroid hormone-binding protein) (CTHBP) (THBP1) [MASS=57805]                                                                                                  | 0.94 | 0.97 | 1.00 | 0.88 | 1.00 | 0.99 | 3 | 0.95 | 0.03 |
| QOR_HUMAN (Q08257) Quinone oxidoreductase (EC 1.6.5.5) (NADPH:quinone reductase) (Zeta-crystallin) [MASS=35206]                                                                                                                                                             | 0.97 | 1.00 | 0.97 | 1.10 | 1.00 | 0.90 | 3 | 1.00 | 0.06 |
| DPYL2_HUMAN (Q16555) Dihydropyrimidinase-related protein 2 (DRP-2) (Collapsin response mediator protein 2) (CRMP-2) (N2A3) [MASS=62293]                                                                                                                                     | 0.93 | 1.15 | 1.00 | 0.85 | 1.00 | 0.95 | 3 | 0.98 | 0.09 |
| ALDOA_HUMAN (P04075) Fructose-bisphosphate aldolase A (EC 4.1.2.13) (Muscle-type aldolase) (Lung cancer antigen NY-LU-1) [MASS=39289]                                                                                                                                       | 0.99 | 0.90 | 0.95 | 1.11 | 0.99 | 1.25 | 3 | 1.09 | 0.10 |

|                                                                                                                                                                                                                                                                             |      |      |      |      |      |      |   |      |      |
|-----------------------------------------------------------------------------------------------------------------------------------------------------------------------------------------------------------------------------------------------------------------------------|------|------|------|------|------|------|---|------|------|
| MAON_HUMAN (Q16798) NADP-dependent malic enzyme, mitochondrial precursor (EC 1.1.1.40) (NADP-ME) (Malic enzyme 3) [MASS=67054]                                                                                                                                              | 0.99 | 1.23 | 0.98 | 1.05 | 0.96 | 0.91 | 3 | 1.06 | 0.09 |
| MAP2_HUMAN (P11137) Microtubule-associated protein 2 (MAP 2) (MAP-2) [MASS=199538]                                                                                                                                                                                          | 0.94 | 1.00 | 1.00 | 0.88 | 0.98 | 0.82 | 3 | 0.90 | 0.05 |
| SSDH_HUMAN (P51649) Succinate semialdehyde dehydrogenase, mitochondrial precursor (EC 1.2.1.24) (NAD(+)-dependent succinic semialdehyde dehydrogenase) [MASS=57214]                                                                                                         | 0.99 | 1.63 | 0.92 | 1.34 | 1.00 | 0.93 | 3 | 1.30 | 0.20 |
| PYC_HUMAN (P11498) Pyruvate carboxylase, mitochondrial precursor (EC 6.4.1.1) (Pyruvic carboxylase) (PCB) [MASS=129633]                                                                                                                                                     | 0.94 | 1.17 | 0.98 | 1.43 | 0.98 | 1.42 | 3 | 1.34 | 0.09 |
| LPPRC_HUMAN (P42704) 130 kDa leucine-rich protein (LRP 130) (GP130) (Leucine-rich PPR motif-containing protein) [MASS=145200]                                                                                                                                               | 0.90 | 1.19 | 0.99 | 1.01 | 1.00 | 1.07 | 3 | 1.09 | 0.05 |
| NDUA5_HUMAN (Q16718) NADH dehydrogenase [ubiquinone] 1 alpha subcomplex subunit 5 (EC 1.6.5.3) (EC 1.6.99.3) (NADH-ubiquinone oxidoreductase 13 kDa-B subunit) (Complex I-13Kd-B) (CI-13Kd-B) (Complex I subunit B13) [MASS=13327]                                          | 0.99 | 1.06 | 1.00 | 1.40 | 0.90 | 0.70 | 3 | 1.05 | 0.20 |
| CISY_HUMAN (O75390) Citrate synthase, mitochondrial precursor (EC 2.3.3.1) [MASS=51712]                                                                                                                                                                                     | 1.00 | 1.21 | 0.94 | 1.29 | 0.95 | 1.39 | 3 | 1.30 | 0.05 |
| COX5B_HUMAN (P10606) Cytochrome c oxidase polypeptide Vb, mitochondrial precursor (EC 1.9.3.1) [MASS=13696]                                                                                                                                                                 | 0.93 | 1.37 | 1.00 | 1.29 | 0.95 | 1.38 | 3 | 1.35 | 0.03 |
| THY1_HUMAN (P04216) Thy-1 membrane glycoprotein precursor (Thy-1 antigen) (CD90 antigen) (CDw90 antigen) [MASS=17935]                                                                                                                                                       | 0.98 | 1.12 | 1.00 | 0.93 | 0.89 | 0.58 | 3 | 0.88 | 0.16 |
| CX6B1_HUMAN (P14854) Cytochrome c oxidase subunit VIb isoform 1 (EC 1.9.3.1) (COX VIb-1) [MASS=10061]                                                                                                                                                                       | 0.99 | 1.28 | 0.83 | 0.96 | 1.00 | 1.44 | 3 | 1.23 | 0.14 |
| DYL1_HUMAN (P63167) Dynein light chain 1, cytoplasmic (Dynein light chain LC8-type 1) (8 kDa dynein light chain) (DLC8) (Protein inhibitor of neuronal nitric oxide synthase) (PIN) [MASS=10366]                                                                            | 1.00 | 0.46 | 0.80 | 0.72 | 1.00 | 0.63 | 3 | 0.60 | 0.08 |
| ODPX_HUMAN (O00330) Pyruvate dehydrogenase protein X component, mitochondrial precursor (Dihydrolipoamide dehydrogenase-binding protein of pyruvate dehydrogenase complex) (Lipoyl-containing pyruvate dehydrogenase complex component X) (E3-binding protein) [MASS=54122] | 0.87 | 1.21 | 0.95 | 1.21 | 0.98 | 1.28 | 3 | 1.23 | 0.02 |
| NCA11_HUMAN (P13591) Neural cell adhesion molecule 1, 140 kDa isoform precursor (N-CAM 140) (NCAM-140) (CD56 antigen) [MASS=93360]                                                                                                                                          | 0.78 | 1.14 | 0.99 | 0.87 | 1.00 | 1.01 | 3 | 1.01 | 0.08 |

|                                                                                                                                                                                                                                                                             |      |      |      |      |      |      |   |      |      |
|-----------------------------------------------------------------------------------------------------------------------------------------------------------------------------------------------------------------------------------------------------------------------------|------|------|------|------|------|------|---|------|------|
| GABT_HUMAN (P80404) 4-aminobutyrate aminotransferase, mitochondrial precursor (EC 2.6.1.19) ((S)-3-amino-2-methylpropionate transaminase) (EC 2.6.1.22) (Gamma-amino-N-butyrate transaminase) (GABA transaminase) (GABA aminotransferase) (GABA-AT) (GABA-T) ( [MASS=56439] | 1.00 | 1.15 | 0.75 | 1.21 | 1.00 | 1.25 | 3 | 1.20 | 0.03 |
| PPIA_HUMAN (P62937) Peptidyl-prolyl cis-trans isomerase A (EC 5.2.1.8) (PPIase A) (Rotamase A) (Cyclophilin A) (Cyclosporin A-binding protein) [MASS=17881]                                                                                                                 | 1.00 | 1.52 | 1.00 | 1.20 | 0.75 | 0.85 | 3 | 1.19 | 0.19 |
| CDC42_HUMAN (P60953) Cell division control protein 42 homolog precursor (G25K GTP-binding protein) [MASS=21310]                                                                                                                                                             | 0.99 | 0.45 | 0.77 | 0.84 | 0.98 | 0.55 | 3 | 0.61 | 0.12 |
| CMC1_HUMAN (O75746) Calcium-binding mitochondrial carrier protein Aralar1 (Mitochondrial aspartate glutamate carrier 1) (Solute carrier family 25 member 12) [MASS=74755]                                                                                                   | 0.73 | 0.96 | 1.00 | 1.00 | 1.00 | 1.19 | 3 | 1.05 | 0.07 |
| ODP2_HUMAN (P10515) Dihydrolipoalysine-residue acetyltransferase component of pyruvate dehydrogenase complex, mitochondrial precursor (EC 2.3.1.12) (Pyruvate dehydrogenase complex E2 subunit) (PDCE2) (E2) (Dihydrolipoamide S-acetyltransferase component [MASS=65781]   | 0.66 | 1.16 | 1.00 | 0.93 | 1.00 | 1.03 | 3 | 1.04 | 0.07 |
| SYIM_HUMAN (Q9NSE4) Isoleucyl-tRNA synthetase, mitochondrial precursor (EC 6.1.1.5) (Isoleucine--tRNA ligase) (IleRS) [MASS=113791]                                                                                                                                         | 0.79 | 0.43 | 0.96 | 1.49 | 0.91 | 1.31 | 3 | 1.08 | 0.33 |
| DHPR_HUMAN (P09417) Dihydropteridine reductase (EC 1.5.1.34) (HDHPR) (Quinoid dihydropteridine reductase) [MASS=25803]                                                                                                                                                      | 0.73 | 1.51 | 0.91 | 0.80 | 1.00 | 1.45 | 3 | 1.25 | 0.23 |
| SNAB_HUMAN (Q9H115) Beta-soluble NSF attachment protein (SNAP-beta) (N-ethylmaleimide-sensitive factor attachment protein, beta) [MASS=33557]                                                                                                                               | 0.69 | 2.17 | 1.00 | 1.62 | 0.85 | 0.95 | 3 | 1.58 | 0.35 |
| MPCP_HUMAN (Q00325) Phosphate carrier protein, mitochondrial precursor (PTP) (Solute carrier family 25 member 3) [MASS=40095]                                                                                                                                               | 0.48 | 1.44 | 1.00 | 0.98 | 1.00 | 1.12 | 3 | 1.18 | 0.14 |
| SCOT_HUMAN (P55809) Succinyl-CoA:3-ketoacid-coenzyme A transferase 1, mitochondrial precursor (EC 2.8.3.5) (Somatic-type succinyl CoA:3-oxoacid CoA-transferase) (Scot-S) [MASS=56157]                                                                                      | 0.42 | 1.73 | 1.00 | 1.11 | 1.00 | 1.24 | 3 | 1.36 | 0.19 |
| ATP8_HUMAN (P03928) ATP synthase protein 8 (EC 3.6.3.14) (ATPase subunit 8) (A6L) [MASS=7992]                                                                                                                                                                               | 0.58 | 1.10 | 0.96 | 1.31 | 0.55 | 1.36 | 3 | 1.26 | 0.08 |
| TBA2_HUMAN (Q13748) Tubulin alpha-2 chain (Alpha-tubulin 2) [MASS=49959]                                                                                                                                                                                                    | 1.00 | 0.34 | 1.00 | *    | 1.00 | 0.13 | 2 | 0.24 | 0.11 |

|                                                                                                                                                                                                                                                                              |      |      |      |      |      |      |   |      |      |
|------------------------------------------------------------------------------------------------------------------------------------------------------------------------------------------------------------------------------------------------------------------------------|------|------|------|------|------|------|---|------|------|
| AT2A2_HUMAN (P16615) Sarcoplasmic/endoplasmic reticulum calcium ATPase 2 (EC 3.6.3.8) (Calcium pump 2) (SERCA2) (SR Ca(2+)-ATPase 2) (Calcium-transporting ATPase sarcoplasmic reticulum type, slow twitch skeletal muscle isoform) (Endoplasmic reticulum cla [MASS=114756] | *    | *    | 1.00 | 0.97 | 1.00 | 1.01 | 2 | 0.99 | 0.02 |
| CLH1_HUMAN (Q00610) Clathrin heavy chain 1 (CLH-17) [MASS=191482]                                                                                                                                                                                                            | 1.00 | 1.38 | *    | *    | 1.00 | 1.11 | 2 | 1.25 | 0.13 |
| GPM6A_HUMAN (P51674) Neuronal membrane glycoprotein M6-a (M6a) [MASS=31209]                                                                                                                                                                                                  | 1.00 | 0.75 | 1.00 | 0.88 | *    | *    | 2 | 0.82 | 0.07 |
| IDH3G_HUMAN (P51553) Isocitrate dehydrogenase [NAD] subunit gamma, mitochondrial precursor (EC 1.1.1.41) (Isocitric dehydrogenase) (NAD(+)-specific ICDH) [MASS=42794]                                                                                                       | *    | *    | 1.00 | 0.98 | 1.00 | 0.93 | 2 | 0.96 | 0.02 |
| KCC2G_HUMAN (Q13555) Calcium/calmodulin-dependent protein kinase type II gamma chain (EC 2.7.11.17) (CaM-kinase II gamma chain) (CaM kinase II gamma subunit) (CaMK-II subunit gamma) [MASS=62609]                                                                           | 1.00 | 1.48 | *    | *    | 1.00 | 0.92 | 2 | 1.20 | 0.28 |
| OPA1_HUMAN (O60313) Dynamin-like 120 kDa protein, mitochondrial precursor (Optic atrophy 1 gene protein) [MASS=111657]                                                                                                                                                       | 1.00 | 1.22 | 1.00 | 1.20 | *    | *    | 2 | 1.21 | 0.01 |
| VATB1_HUMAN (P15313) Vacuolar ATP synthase subunit B, kidney isoform (EC 3.6.3.14) (V-ATPase B1 subunit) (Vacuolar proton pump B isoform 1) (Endomembrane proton pump 58 kDa subunit) [MASS=56980]                                                                           | 1.00 | 1.35 | 0.00 | *    | 1.00 | 1.03 | 2 | 1.19 | 0.16 |
| ANXA2_HUMAN (P07355) Annexin A2 (Annexin II) (Lipocortin II) (Calpactin I heavy chain) (Chromobindin-8) (p36) (Protein I) (Placental anticoagulant protein IV) (PAP-IV) [MASS=38473]                                                                                         | 1.00 | 1.54 | 0.99 | 1.01 | *    | *    | 2 | 1.28 | 0.27 |
| ATPO_HUMAN (P48047) ATP synthase O subunit, mitochondrial precursor (EC 3.6.3.14) (Oligomycin sensitivity conferral protein) (OSCP) [MASS=23277]                                                                                                                             | *    | *    | 1.00 | 1.12 | 0.99 | 1.01 | 2 | 1.07 | 0.06 |
| GNAO1_HUMAN (P09471) Guanine nucleotide-binding protein G(o) subunit alpha 1 [MASS=39919]                                                                                                                                                                                    | *    | *    | 0.99 | 0.86 | 1.00 | 1.22 | 2 | 1.04 | 0.18 |
| ODPB_HUMAN (P11177) Pyruvate dehydrogenase E1 component subunit beta, mitochondrial precursor (EC 1.2.4.1) (PDHE1-B) [MASS=39219]                                                                                                                                            | 1.00 | 0.68 | *    | *    | 0.99 | 0.96 | 2 | 0.82 | 0.14 |
| PRDX3_HUMAN (P30048) Thioredoxin-dependent peroxide reductase, mitochondrial precursor (EC 1.11.1.15) (Peroxiredoxin-3) (PRX III) (Antioxidant protein 1) (AOP-1) (Protein MER5 homolog) (HBC189) [MASS=27692]                                                               | *    | *    | 0.99 | 1.20 | 1.00 | 0.56 | 2 | 0.88 | 0.32 |
| 1433T_HUMAN (P27348) 14-3-3 protein theta (14-3-3 protein tau) (14-3-3 protein T-cell) (HS1 protein) [MASS=27764]                                                                                                                                                            | *    | *    | 0.98 | 0.92 | 1.00 | 0.77 | 2 | 0.85 | 0.08 |

|                                                                                                                                                                                                                                               |      |      |      |      |      |      |   |      |      |
|-----------------------------------------------------------------------------------------------------------------------------------------------------------------------------------------------------------------------------------------------|------|------|------|------|------|------|---|------|------|
| 2AAA_HUMAN (P30153) Serine/threonine-protein phosphatase 2A 65 kDa regulatory subunit A alpha isoform (PP2A, subunit A, PR65-alpha isoform) (PP2A, subunit A, R1-alpha isoform) (Medium tumor antigen-associated 61 kDa protein) [MASS=65092] | *    | *    | 0.99 | 1.00 | 0.99 | 1.09 | 2 | 1.05 | 0.05 |
| ALBU_HUMAN (P02768) Serum albumin precursor [MASS=69366]                                                                                                                                                                                      | 1.00 | 1.03 | *    | *    | 0.98 | 0.99 | 2 | 1.01 | 0.02 |
| AT1A2_HUMAN (P50993) Sodium/potassium-transporting ATPase alpha-2 chain precursor (EC 3.6.3.9) (Sodium pump 2) (Na+/K+ ATPase 2) [MASS=112265]                                                                                                | *    | *    | 0.98 | 0.85 | 1.00 | 0.78 | 2 | 0.82 | 0.04 |
| CRTC_HUMAN (P27797) Calreticulin precursor (CRP55) (Calregulin) (HACBP) (ERp60) (grp60) [MASS=48141]                                                                                                                                          | *    | *    | 1.00 | 1.06 | 0.98 | 1.35 | 2 | 1.21 | 0.15 |
| ECHB_HUMAN (P55084) Trifunctional enzyme subunit beta, mitochondrial precursor (TP-beta) [Includes: 3-ketoacyl-CoA thiolase (EC 2.3.1.16) (Acetyl-CoA acyltransferase) (Beta-ketothiolase)] [MASS=51395]                                      | *    | *    | 0.98 | 2.45 | 1.00 | 1.25 | 2 | 1.85 | 0.60 |
| GBB2_HUMAN (P62879) Guanine nucleotide-binding protein G(I)/G(S)/G(T) subunit beta 2 (Transducin beta chain 2) (G protein beta 2 subunit) [MASS=37200]                                                                                        | 0.99 | 0.78 | 0.99 | 0.92 | *    | *    | 2 | 0.85 | 0.07 |
| GPDM_HUMAN (P43304) Glycerol-3-phosphate dehydrogenase, mitochondrial precursor (EC 1.1.99.5) (GPD-M) (GPDH-M) (mtGPD) [MASS=80833]                                                                                                           | *    | *    | 1.00 | 2.07 | 0.98 | 1.05 | 2 | 1.56 | 0.51 |
| IMMT_HUMAN (Q16891) Mitochondrial inner membrane protein (Mitofilin) (p87/89) (Proliferation-inducing gene 4 protein) [MASS=83677]                                                                                                            | *    | *    | 0.99 | 1.48 | 0.99 | 1.17 | 2 | 1.33 | 0.15 |
| LETM1_HUMAN (O95202) Leucine zipper-EF-hand-containing transmembrane protein 1, mitochondrial precursor [MASS=83354]                                                                                                                          | 0.99 | 1.44 | 0.99 | 1.16 | *    | *    | 2 | 1.30 | 0.14 |
| EF1A1_HUMAN (P68104) Elongation factor 1-alpha 1 (EF-1-alpha-1) (Elongation factor 1 A-1) (eEF1A-1) (Elongation factor Tu) (EF-Tu) [MASS=50141]                                                                                               | 0.98 | 0.97 | 0.99 | 1.18 | *    | *    | 2 | 1.08 | 0.11 |
| KAC_HUMAN (P01834) Ig kappa chain C region [MASS=11609]                                                                                                                                                                                       | *    | *    | 0.99 | 1.22 | 0.98 | 0.88 | 2 | 1.05 | 0.17 |
| N4BM_HUMAN (O95298) NADH-ubiquinone oxidoreductase subunit B14.5b (EC 1.6.5.3) (EC 1.6.99.3) (Complex I-B14.5b) (CI-B14.5b) [MASS=14187]                                                                                                      | *    | *    | 0.99 | 1.32 | 0.98 | 1.33 | 2 | 1.33 | 0.01 |
| SEPT7_HUMAN (Q16181) Septin-7 (CDC10 protein homolog) [MASS=50680]                                                                                                                                                                            | *    | *    | 1.00 | 0.93 | 0.97 | 0.94 | 2 | 0.94 | 0.00 |
| MMSA_HUMAN (Q02252) Methylmalonate-semialdehyde dehydrogenase [acylating], mitochondrial precursor (EC 1.2.1.27) (MMSDH) (Malonate-semialdehyde dehydrogenase [acylating]) (EC 1.2.1.18) [MASS=57839]                                         | *    | *    | 0.98 | 1.40 | 0.98 | 1.76 | 2 | 1.58 | 0.18 |

|                                                                                                                                                                                                                                                                             |      |      |      |      |      |      |   |      |      |
|-----------------------------------------------------------------------------------------------------------------------------------------------------------------------------------------------------------------------------------------------------------------------------|------|------|------|------|------|------|---|------|------|
| NUCGL_HUMAN (Q9Y2C4) Endonuclease G-like 1 (EC 3.1.30.-) (Endo G-like) [MASS=41127]                                                                                                                                                                                         | *    | *    | 0.98 | 1.15 | 0.98 | 1.03 | 2 | 1.09 | 0.06 |
| ODO1_HUMAN (Q02218) 2-oxoglutarate dehydrogenase E1 component, mitochondrial precursor (EC 1.2.4.2) (Alpha-ketoglutarate dehydrogenase) [MASS=113475]                                                                                                                       | *    | *    | 0.94 | 0.89 | 0.99 | 0.82 | 2 | 0.86 | 0.04 |
| H33_HUMAN (P84243) Histone H3.3 [MASS=15197]                                                                                                                                                                                                                                | 0.92 | 2.33 | *    | *    | 1.00 | 2.58 | 2 | 2.46 | 0.13 |
| MCCA_HUMAN (Q96RQ3) Methylcrotonoyl-CoA carboxylase subunit alpha, mitochondrial precursor (EC 6.4.1.4) (3-methylcrotonyl-CoA carboxylase 1) (MCCase alpha subunit) (3-methylcrotonyl-CoA:carbon dioxide ligase subunit alpha) (3-methylcrotonyl-CoA carboxyla [MASS=80473] | *    | *    | 0.92 | 0.87 | 1.00 | 0.99 | 2 | 0.93 | 0.06 |
| NDUA7_HUMAN (O95182) NADH dehydrogenase [ubiquinone] 1 alpha subcomplex subunit 7 (EC 1.6.5.3) (EC 1.6.99.3) (NADH-ubiquinone oxidoreductase subunit B14.5a) (Complex I-B14.5a) (CI-B14.5a) [MASS=12420]                                                                    | *    | *    | 0.93 | 1.65 | 0.98 | 1.65 | 2 | 1.65 | 0.00 |
| ODB2_HUMAN (P11182) Lipoamide acyltransferase component of branched-chain alpha-keto acid dehydrogenase complex, mitochondrial precursor (EC 2.3.1.168) (Dihydrolipoyllysine-residue (2-methylpropanoyl)transferase) (E2) (Dihydrolipoamide branched chain tra [MASS=53487] | *    | *    | 0.92 | 1.11 | 0.99 | 0.95 | 2 | 1.03 | 0.08 |
| TPIS_HUMAN (P60174) Triosephosphate isomerase (EC 5.3.1.1) (TIM) (Triose-phosphate isomerase) [MASS=26538]                                                                                                                                                                  | 0.91 | 1.11 | *    | *    | 1.00 | 0.77 | 2 | 0.94 | 0.17 |
| VPP1_HUMAN (Q93050) Vacuolar proton translocating ATPase 116 kDa subunit a isoform 1 (V-ATPase 116 kDa isoform a1) (Clathrin-coated vesicle/synaptic vesicle proton pump 116 kDa subunit) (Vacuolar proton pump subunit 1) (Vacuolar adenosine triphosphatase [MASS=96412]  | *    | *    | 0.95 | 0.86 | 0.96 | 1.04 | 2 | 0.95 | 0.09 |
| CSPG2_HUMAN (P13611) Versican core protein precursor (Large fibroblast proteoglycan) (Chondroitin sulfate proteoglycan core protein 2) (PG-M) (Glial hyaluronate-binding protein) (GHAP) [MASS=372817]                                                                      | *    | *    | 1.00 | 0.84 | 0.90 | 0.72 | 2 | 0.78 | 0.06 |
| PGK1_HUMAN (P00558) Phosphoglycerate kinase 1 (EC 2.7.2.3) (Primer recognition protein 2) (PRP 2) [MASS=44483]                                                                                                                                                              | *    | *    | 0.99 | 0.83 | 0.88 | 0.86 | 2 | 0.85 | 0.02 |
| SERA_HUMAN (O43175) D-3-phosphoglycerate dehydrogenase (EC 1.1.1.95) (3-PGDH) [MASS=56519]                                                                                                                                                                                  | *    | *    | 0.88 | 1.26 | 0.99 | 1.04 | 2 | 1.15 | 0.11 |
| GBG2_HUMAN (P59768) Guanine nucleotide-binding protein G(I)/G(S)/G(O) gamma-2 subunit precursor (G gamma-I) [MASS=7719]                                                                                                                                                     | 0.97 | 1.09 | *    | *    | 0.89 | 0.81 | 2 | 0.95 | 0.14 |
| MOG_HUMAN (Q16653) Myelin-oligodendrocyte glycoprotein precursor [MASS=28179]                                                                                                                                                                                               | 0.86 | 0.92 | 1.00 | 1.51 | *    | *    | 2 | 1.22 | 0.30 |

|                                                                                                                                                                                                                                                            |      |      |      |      |      |      |   |      |      |
|------------------------------------------------------------------------------------------------------------------------------------------------------------------------------------------------------------------------------------------------------------|------|------|------|------|------|------|---|------|------|
| ECHM_HUMAN (P30084) Enoyl-CoA hydratase, mitochondrial precursor (EC 4.2.1.17) (Short chain enoyl-CoA hydratase) (SCEH) (Enoyl-CoA hydratase 1) [MASS=31387]                                                                                               | *    | *    | 1.00 | 1.08 | 0.81 | 1.54 | 2 | 1.31 | 0.23 |
| PEBP1_HUMAN (P30086) Phosphatidylethanolamine-binding protein 1 (PEBP-1) (Prostatic-binding protein) (HCNPPp) (Neuropolypeptide h3) (Raf kinase inhibitor protein) (RKIP) [Contains: Hippocampal cholinergic neurostimulating peptide (HCNP)] [MASS=20925] | 0.95 | 0.87 | *    | *    | 0.86 | 0.94 | 2 | 0.91 | 0.03 |
| AOFB_HUMAN (P27338) Amine oxidase [flavin-containing] B (EC 1.4.3.4) (Monoamine oxidase type B) (MAO-B) [MASS=58631]                                                                                                                                       | *    | *    | 0.90 | 1.17 | 0.90 | 1.35 | 2 | 1.26 | 0.09 |

**Table 11. LAD Mitochondrial Study  
Experiment 1**

| Description                                                                                                                                                                                                                                                          | A = Protein Score |       |      |      | E = XPress Peptides |   |   |                                                | Peptide Sequence | H |
|----------------------------------------------------------------------------------------------------------------------------------------------------------------------------------------------------------------------------------------------------------------------|-------------------|-------|------|------|---------------------|---|---|------------------------------------------------|------------------|---|
|                                                                                                                                                                                                                                                                      | A                 | B     | C    | D    | E                   | F | G |                                                |                  |   |
| 1433E_HUMAN (P62258) 14-3-3 protein epsilon (14-3-3E) [MASS=29174]                                                                                                                                                                                                   | 0.00              | 9.02  | 0.24 | 0.00 | 1                   | 1 | 3 | LGLALNFSVFYIEILNSPDRAC[330]R                   | 1                |   |
| 2AAA_HUMAN (P30153) Serine/threonine-protein phosphatase 2A 65 kDa regulatory subunit A alpha isoform (PP2A, subunit A, PR65-alpha isoform) (PP2A, subunit A, R1-alpha isoform) (Medium tumor antigen-associated 61 kDa protein) [MASS=65092]                        | *                 | 3.57  | *    | *    | *                   | 1 | 3 | M[147]TTLFC[339]INVLSEVC[330]GQDITTK           | 1                |   |
| 2ABA_HUMAN (P63151) Serine/threonine-protein phosphatase 2A 55 kDa regulatory subunit B alpha isoform (PP2A, subunit B, B-alpha isoform) (PP2A, subunit B, B55-alpha isoform) (PP2A, subunit B, PR55-alpha isoform) (PP2A, subunit B, R2-alpha isoform) [MASS=51692] | 0.00              | 5.82  | 0.85 | 0.00 | 1                   | 1 | 3 | FEC[330]C[330]WNGSDSVVM[147]TGSYNNFFRM[147]FDR | 1                |   |
| 5NT1B_HUMAN (Q96P26) Cytosolic 5'-nucleotidase 1B (EC 3.1.3.5) (Cytosolic 5'-nucleotidase 1B) (cN1B) (cN-1B) (Autoimmune infertility-related protein) [MASS=68803]                                                                                                   | *                 | 0.82  | *    | *    | *                   | 1 | 1 | GYLVR                                          | 1                |   |
| 5NTC_HUMAN (P49902) Cytosolic purine 5'-nucleotidase (EC 3.1.3.5) (5'-nucleotidase cytosolic II) [MASS=64969]                                                                                                                                                        | *                 | 1.60  | *    | *    | *                   | 1 | 2 | HLDSSSNER                                      | 1                |   |
| AATM_HUMAN (P00505) Aspartate aminotransferase, mitochondrial precursor (EC 2.6.1.1) (Transaminase A) (Glutamate oxaloacetate transaminase 2) [MASS=47475]                                                                                                           | 1.00              | 12.09 | 1.41 | 0.04 | 4                   | 3 | 2 | NLDKEYLPIGGLAEFC[339]K                         | 2                |   |
|                                                                                                                                                                                                                                                                      |                   |       |      |      |                     |   | 2 | NLDKEYLPIGGLAEFC[330]K                         | 1                |   |
|                                                                                                                                                                                                                                                                      |                   |       |      |      |                     |   | 2 | GMADRIIGM[147]RTQLVSNLK                        | 1                |   |
|                                                                                                                                                                                                                                                                      |                   |       |      |      |                     |   | 3 | HFIEQGINVC[339]LC[339]QSYAK                    | 1                |   |



|                                                                                                                                                                                       |      |       |      |      |   |   |   |                                                  |   |
|---------------------------------------------------------------------------------------------------------------------------------------------------------------------------------------|------|-------|------|------|---|---|---|--------------------------------------------------|---|
| ABCB6_HUMAN (Q9NP58) ATP-binding cassette sub-family B member 6, mitochondrial precursor (Mitochondrial ABC transporter 3) (Mt-ABC transporter 3) (ABC transporter umat) [MASS=93885] | *    | 1.07  | *    | *    | * | 1 | 1 | DLPGAGPLR                                        | 1 |
| ABLM1_HUMAN (O14639) Actin-binding LIM protein 1 (Actin-binding LIM protein family member 1) (abLIM-1) (Actin-binding double-zinc-finger protein) (LIMAB1) (Limatin) [MASS=87644]     | 0.00 | 8.10  | 1.48 | 0.00 | 1 | 3 | 3 | VQTKHFHIKC[339]FTC[330]K                         | 1 |
|                                                                                                                                                                                       |      |       |      |      |   |   | 3 | C[339]NQMFTEGEEMYLQGSTVWHPDC[339]K               | 1 |
|                                                                                                                                                                                       |      |       |      |      |   |   | 3 | QLQEEQLMKLNSGLGQLILKEEMEK                        | 1 |
| ACADS_HUMAN (P16219) Short-chain specific acyl-CoA dehydrogenase, mitochondrial precursor (EC 1.3.99.2) (SCAD) (Butyryl-CoA dehydrogenase) [MASS=44297]                               | *    | 7.04  | *    | *    | * | 1 | 3 | GC[339]ASTGVIM[147]SVNNSLYLGPILKFGSKEQK          | 1 |
| ACON_HUMAN (Q99798) Aconitate hydratase, mitochondrial precursor (EC 4.2.1.3) (Citrate hydro-lyase) (Aconitase) [MASS=85425]                                                          | 0.99 | 3.46  | 1.46 | 0.00 | 1 | 2 | 1 | DFTPGK                                           | 1 |
|                                                                                                                                                                                       |      |       |      |      |   |   | 2 | VAVPSTIHC[339]DHLIEAQVGGEK                       | 1 |
| ACPM_HUMAN (O14561) Acyl carrier protein, mitochondrial precursor (ACP) (NADH-ubiquinone oxidoreductase 9.6 kDa subunit) (Cl-SDAP) [MASS=17417]                                       | 1.00 | 21.79 | 1.16 | 0.11 | 5 | 2 | 3 | LMC[339]PQEIVDYIADKK                             | 1 |
|                                                                                                                                                                                       |      |       |      |      |   |   | 3 | LM[147]C[339]PQEIVDYIADKKDVYE                    | 2 |
|                                                                                                                                                                                       |      |       |      |      |   |   | 3 | LM[147]C[330]PQEIVDYIADKKDVYE                    | 3 |
| ACSL6_HUMAN (Q9UKU0) Long-chain-fatty-acid--CoA ligase 6 (EC 6.2.1.3) (Long-chain acyl-CoA synthetase 6) (LACS 6) [MASS=77680]                                                        | 0.98 | 1.72  | 1.42 | 0.00 | 1 | 1 | 2 | ALC[339]PTIFPVVPR                                | 1 |
| ACTB_HUMAN (P60709) Actin, cytoplasmic 1 (Beta-actin) [MASS=41736]                                                                                                                    | 1.00 | 16.00 | 1.20 | 0.09 | 4 | 3 | 3 | C[330]PEALFQPSFLGM[147]ESC[330]GIHETTFNSIM[147]K | 1 |
|                                                                                                                                                                                       |      |       |      |      |   |   | 2 | C[339]DVDIRK                                     | 1 |
|                                                                                                                                                                                       |      |       |      |      |   |   | 3 | EKLC[330]YVALDFEQEMATAAASSSSLEK                  | 1 |
|                                                                                                                                                                                       |      |       |      |      |   |   | 3 | C[339]PEALFQPSFLGM[147]ESC[339]GIHETTFNSIMK      | 1 |
|                                                                                                                                                                                       |      |       |      |      |   |   | 3 | C[339]PEALFQPSFLGM[147]ESC[339]GIHETTFNSIM[147]K | 1 |
| ACTN4_HUMAN (O43707) Alpha-actinin-4 (Non-muscle alpha-actinin 4) (F-actin cross linking protein) [MASS=104853]                                                                       | *    | 2.96  | *    | *    | * | 1 | 3 | MEEIGRISIEMNGTLEDQLSHLKQYER                      | 1 |

|                                                                                                                                                                                                                                                                               |      |       |      |      |    |   |   |                             |                                  |   |
|-------------------------------------------------------------------------------------------------------------------------------------------------------------------------------------------------------------------------------------------------------------------------------|------|-------|------|------|----|---|---|-----------------------------|----------------------------------|---|
|                                                                                                                                                                                                                                                                               |      |       |      |      |    |   |   | 2                           | YFAGNLASGGAAGATSLC[330]FVYPLDFAR | 2 |
|                                                                                                                                                                                                                                                                               |      |       |      |      |    |   |   | 2                           | VKLLLQVQHASK                     | 1 |
|                                                                                                                                                                                                                                                                               |      |       |      |      |    |   |   | 2                           | EFHGLGDC[339]IHK                 | 2 |
| ADT1_HUMAN (P12235) ADP/ATP translocase 1 (Adenine nucleotide translocator 1) (ANT 1) (ADP,ATP carrier protein 1) (Solute carrier family 25 member 4) (ADP,ATP carrier protein, heart/skeletal muscle isoform T1) [MASS=32933]                                                | 1.00 | 23.57 | 1.23 | 0.05 | 12 | 4 |   | 1                           | EFHGLGDC[339]IHK                 | 1 |
|                                                                                                                                                                                                                                                                               |      |       |      |      |    |   |   | 3                           | TAVAPIERVKLLLQVQHASK             | 1 |
|                                                                                                                                                                                                                                                                               |      |       |      |      |    |   |   | 2                           | YFAGNLASGGAAGATSLC[339]FVYPLDFAR | 3 |
|                                                                                                                                                                                                                                                                               |      |       |      |      |    |   |   | 2                           | EFHGLGDC[330]IHK                 | 1 |
|                                                                                                                                                                                                                                                                               |      |       |      |      |    |   |   | 3                           | YFAGNLASGGAAGATSLC[339]FVYPLDFAR | 3 |
|                                                                                                                                                                                                                                                                               |      |       |      |      |    |   |   | 3                           | YFAGNLASGGAAGATSLC[330]FVYPLDFAR | 1 |
| ADT2_HUMAN (P05141) ADP/ATP translocase 2 (Adenine nucleotide translocator 2) (ANT 2) (ADP,ATP carrier protein 2) (Solute carrier family 25 member 5) (ADP,ATP carrier protein, fibroblast isoform) [MASS=32764]                                                              | 0.00 | 2.69  | *    | *    | *  | 1 | 1 | 1                           | GLGDC[330]LVK                    | 1 |
| AFG32_HUMAN (Q9Y4W6) AFG3-like protein 2 (EC 3.4.24.-) (Paraplegin-like protein) [MASS=88483]                                                                                                                                                                                 | 0.33 | 7.78  | 1.17 | 0.00 | 1  | 4 |   | 2                           | EVLKNDMVELLGPFPFAEK              | 1 |
|                                                                                                                                                                                                                                                                               |      |       |      |      |    |   |   | 2                           | KNAPC[339]ILFIDEIDAVGR           | 1 |
|                                                                                                                                                                                                                                                                               |      |       |      |      |    |   |   | 2                           | HFEQAIERVIGGLEK                  | 1 |
|                                                                                                                                                                                                                                                                               |      |       |      |      |    |   |   | 2                           | NDMVELLGPR                       | 1 |
| AGAL_HUMAN (P06280) Alpha-galactosidase A precursor (EC 3.2.1.22) (Melibiase) (Alpha-D-galactoside galactohydrolase) (Alpha-D-galactosidase A) (Agalsidase alfa) [MASS=48767]                                                                                                 | 0.00 | 8.62  | 2.10 | 0.00 | 1  | 2 | 3 | QYC[330]NHWRFADIDDSWKSJK    | 1                                |   |
|                                                                                                                                                                                                                                                                               |      |       |      |      |    |   | 2 | GVAC[339]NPAC[339]FITQLLPVK | 1                                |   |
| AGRN_HUMAN (O00468) Agrin precursor [MASS=214888]                                                                                                                                                                                                                             | *    | 0.64  | *    | *    | *  | 1 | 2 | YDLGKGAIVRSR                | 1                                |   |
| AKAP9_HUMAN (Q99996) A-kinase anchor protein 9 (Protein kinase A-anchoring protein 9) (PRKA9) (A-kinase anchor protein 450 kDa) (AKAP 450) (A-kinase anchor protein 350 kDa) (AKAP 350) (hgAKAP 350) (AKAP 120-like protein) (Protein hyperion) (Protein yotia) [MASS=453664] | *    | 1.23  | *    | *    | *  | 3 |   | 2                           | GSIIINLETR                       | 1 |
|                                                                                                                                                                                                                                                                               |      |       |      |      |    |   |   | 2                           | QRDGITQLTANLQQAR                 | 1 |
|                                                                                                                                                                                                                                                                               |      |       |      |      |    |   |   | 2                           | QIQEKTDIIDRLEQELLC[330]JASNR     | 1 |

|                                                                                                                                                                 |      |       |      |      |   |   |   |                                        |   |
|-----------------------------------------------------------------------------------------------------------------------------------------------------------------|------|-------|------|------|---|---|---|----------------------------------------|---|
| ALBU_HUMAN (P02768) Serum albumin precursor [MASS=69366]                                                                                                        | 1.00 | 12.48 | 1.03 | 0.21 | 4 | 4 | 2 | RPC[339]FSALEVDETYVPK                  | 1 |
|                                                                                                                                                                 |      |       |      |      |   |   | 2 | ALVLIIFAQYLQQC[339]PFEDHVK             | 1 |
|                                                                                                                                                                 |      |       |      |      |   |   | 2 | SLHTLFGDKLC[330]TVATLR                 | 1 |
|                                                                                                                                                                 |      |       |      |      |   |   | 3 | VHTEC[330]C[330]HGDLLLEC[330]ADDRADLAK | 1 |
| ALDH2_HUMAN (P05091) Aldehyde dehydrogenase, mitochondrial precursor (EC 1.2.1.3) (ALDH class 2) (ALDHI) (ALDH-E2) [MASS=56381]                                 | 0.96 | 2.13  | 1.20 | 0.00 | 1 | 1 | 2 | LLC[339]GGGIAADR                       | 1 |
| ALDOA_HUMAN (P04075) Fructose-bisphosphate aldolase A (EC 4.1.2.13) (Muscle-type aldolase) (Lung cancer antigen NY-LU-1) [MASS=39289]                           | 0.99 | 7.71  | 0.90 | 0.00 | 1 | 1 | 3 | ALSDHHIYLEGTLKPNM[147]VTPGHAC[339]TQK  | 1 |
| ALKB3_HUMAN (Q96Q83) Alkylated repair protein alkB homolog 3 (Prostate cancer antigen 1) (DEPC-1) [MASS=33374]                                                  | 0.00 | 6.64  | 0.46 | 0.00 | 1 | 1 | 3 | C[330]PIIASLSFGATRTFEM[147]RK          | 1 |
| AN30A_HUMAN (Q9BXX3) Ankyrin repeat domain-containing protein 30A (NY-BR-1 antigen) [MASS=152673]                                                               | 0.00 | 1.34  | 0.12 | 0.05 | 2 | 1 | 2 | LEGSPVKDGLLKANC[330]GMK                | 2 |
| ANK1_HUMAN (P16157) Ankyrin-1 (Erythrocyte ankyrin) (Ankyrin-R) [MASS=206144]                                                                                   | 0.50 | 0.69  | *    | *    | * | 1 | 2 | ALNGFTPLHIAC[339]K                     | 1 |
| ANK2_HUMAN (Q01484) Ankyrin-2 (Brain ankyrin) (Ankyrin-B) (Ankyrin, nonerythroid) [MASS=430341]                                                                 | 0.50 | 1.17  | 1.44 | 0.00 | 1 | 3 | 2 | TEKHSPVSPSTKTER                        | 1 |
|                                                                                                                                                                 |      |       |      |      |   |   | 3 | C[339]LLRNGALVDAR                      | 1 |
|                                                                                                                                                                 |      |       |      |      |   |   | 3 | TVAPQGQDM[147]ASIAPDNRSK               | 1 |
|                                                                                                                                                                 |      |       |      |      |   |   | 3 | SVVSPVKSIRDVISSAK                      | 1 |
|                                                                                                                                                                 |      |       |      |      |   |   | 1 | SSSSEK                                 | 1 |
|                                                                                                                                                                 |      |       |      |      |   |   | 2 | ESPSSDVFHDSPIDGLEK                     | 1 |
| ANK3_HUMAN (Q12955) Ankyrin-3 (ANK-3) (Ankyrin-G) [MASS=480400]                                                                                                 | 0.50 | 2.79  | *    | *    | * | 9 | 3 | KTTKGLPQTAVC[339]NLNITLPAHK            | 1 |
|                                                                                                                                                                 |      |       |      |      |   |   | 2 | EMVYVYQK                               | 1 |
|                                                                                                                                                                 |      |       |      |      |   |   | 2 | VGLQAQVPVDEIVKK                        | 1 |
|                                                                                                                                                                 |      |       |      |      |   |   | 3 | GKERELIVLR                             | 1 |
|                                                                                                                                                                 |      |       |      |      |   |   | 2 | TEKLNDELQSPEKK                         | 1 |
|                                                                                                                                                                 |      |       |      |      |   |   | 3 | DSM[147]M[147]IEELLVPSK                | 1 |
| ANM3_HUMAN (O60678) Protein arginine N-methyltransferase 3 (EC 2.1.1.-) (Heterogeneous nuclear ribonucleoprotein methyltransferase-like protein 3) [MASS=59903] | *    | 2.45  | *    | *    | * | 1 | 3 | SEHQFNIDSM[147]VHK                     | 4 |
| ANR50_HUMAN (Q9ULJ7) Ankyrin repeat domain-containing protein 50 [MASS=149588]                                                                                  | 0.00 | 2.04  | 0.61 | 0.00 | 1 | 1 | 3 | YGASSLNGC[330]SPSPVHTMEQKPLQSLSSK      | 1 |

|                                                                                                                                                                                                                                                                              |      |                               |      |      |   |   |   |                                                |   |
|------------------------------------------------------------------------------------------------------------------------------------------------------------------------------------------------------------------------------------------------------------------------------|------|-------------------------------|------|------|---|---|---|------------------------------------------------|---|
| ANXA2_HUMAN (P07355) Annexin A2 (Annexin II) (Lipocortin II) (Calpactin I heavy chain) (Chromobindin-8) (p36) (Protein I) (Placental anticoagulant protein IV) (PAP-IV) [MASS=38473]                                                                                         | 2    | GDLENAFLNLVQC[339]IQNKPLYFADR | 2    |      |   |   |   |                                                |   |
|                                                                                                                                                                                                                                                                              | 3    | GDLENAFLNLVQC[339]IQNKPLYFADR | 2    |      |   |   |   |                                                |   |
|                                                                                                                                                                                                                                                                              | 3    | GDLENAFLNLVQC[330]IQNKPLYFADR | 1    |      |   |   |   |                                                |   |
| ANXA7_HUMAN (P20073) Annexin A7 (Annexin VII) (Synexin) [MASS=52739]                                                                                                                                                                                                         | 0.62 | 3.28                          | 1.22 | 0.00 | 1 | 1 | 2 | TILQC[339]ALNRPAFFAER                          | 1 |
| AOFA_HUMAN (P21397) Amine oxidase [flavin-containing] A (EC 1.4.3.4) (Monoamine oxidase type A) (MAO-A) [MASS=59681]                                                                                                                                                         | 0.99 | 5.31                          | 1.41 | 0.00 | 1 | 1 | 3 | LNHPVTHVDQSSDNIIIETLNHEHYEC[339]K              | 1 |
| AOFB_HUMAN (P27338) Amine oxidase [flavin-containing] B (EC 1.4.3.4) (Monoamine oxidase type B) (MAO-B) [MASS=58631]                                                                                                                                                         | *    | 6.17                          | *    | *    | * | 1 | 3 | C[330]DVVVVGGGIGSMAAAKLLHDSGLNVVLEAR           | 1 |
| AP1B1_HUMAN (Q10567) AP-1 complex subunit beta-1 (Adapter-related protein complex 1 beta-1 subunit) (Beta-adaptin 1) (Adaptor protein complex AP-1 beta-1 subunit) (Golgi adaptor HA1/AP1 adaptin beta subunit) (Clathrin assembly protein complex 1 beta larg [MASS=104606] | 0.37 | 2.00                          | 1.03 | 0.00 | 1 | 2 | 2 | C[339]AIKVEQSAER                               | 1 |
|                                                                                                                                                                                                                                                                              |      |                               |      |      |   |   | 2 | YNDPIYVK                                       | 1 |
| APC_HUMAN (P25054) Adenomatous polyposis coli protein (Protein APC) [MASS=311644]                                                                                                                                                                                            | *    | 0.67                          | *    | *    | * | 1 | 3 | NM[147]GGILGEDLTLDLKDQIR                       | 1 |
| AQP11_HUMAN (Q8NBQ7) Aquaporin-11 (AQP-11) [MASS=30203]                                                                                                                                                                                                                      | 0.00 | 11.81                         | 6.41 | 0.00 | 1 | 1 | 3 | M[147]SPLLGLRSELQDTC[339]TSLGLMLSVVLLMGLAR     | 1 |
| ARBK2_HUMAN (P35626) Beta-adrenergic receptor kinase 2 (EC 2.7.11.15) (Beta-ARK-2) (G-protein-coupled receptor kinase 3) [MASS=79677]                                                                                                                                        | 0.00 | 2.91                          | 0.19 | 0.00 | 1 | 1 | 3 | GGKQFVLQC[330]ESDPEFVQWKK                      | 1 |
| ARHG2_HUMAN (Q92974) Rho/Rac guanine nucleotide exchange factor 2 (GEF-H1 protein) (Proliferating cell nucleolar antigen p40) [MASS=101173]                                                                                                                                  | *    | 3.25                          | *    | *    | * | 2 | 3 | ILSQSTDSLNM[147]R                              | 1 |
|                                                                                                                                                                                                                                                                              |      |                               |      |      |   |   | 2 | STWIRVIQQSVRTC[330]PSR                         | 1 |
| ARHG3_HUMAN (Q9NR81) Rho guanine nucleotide exchange factor 3 (Exchange factor found in platelets and leukemic and neuronal tissues) (XPLN) [MASS=59782]                                                                                                                     | 0.00 | 5.89                          | 1.18 | 0.00 | 1 | 2 | 1 | SISFR                                          | 1 |
|                                                                                                                                                                                                                                                                              |      |                               |      |      |   |   | 3 | LEQM[147]DQSDSESDC[330]SM[147]DTSEVSLDC[330]ER | 1 |

|                                                                                                                                                                     |      |      |      |      |   |   |   |                                     |   |
|---------------------------------------------------------------------------------------------------------------------------------------------------------------------|------|------|------|------|---|---|---|-------------------------------------|---|
| ARI4A_HUMAN (P29374) AT-rich interactive domain-containing protein 4A (ARID domain-containing protein 4A) (Retinoblastoma-binding protein 1) (RBBP-1) [MASS=142666] | *    | 0.88 | *    | *    | * | 1 | 3 | TSDC[339]IGSEGM[147]K               | 1 |
| ARID2_HUMAN (Q68CP9) AT-rich interactive domain-containing protein 2 (ARID domain-containing protein 2) (BRG1-associated factor 200) (BAF200) [MASS=197390]         | *    | 0.33 | *    | *    | * | 1 | 1 | APPDER                              | 2 |
| AT10B_HUMAN (O94823) Probable phospholipid-transporting ATPase VB (EC 3.6.3.1) [MASS=165390]                                                                        | 0.00 | 1.71 | 1.09 | 0.00 | 1 | 1 | 3 | EAGIQLWVLTGDKQETAVNIAHSC[330]R      | 1 |
| AT10D_HUMAN (Q9P241) Probable phospholipid-transporting ATPase VD (EC 3.6.3.1) (ATPVD) [MASS=160319]                                                                | 0.20 | 5.40 | 0.65 | 0.61 | 2 | 4 | 3 | C[330]SVAGFDYC[330]HEENAR           | 1 |
|                                                                                                                                                                     |      |      |      |      |   |   | 3 | DDDSGPYNYSSLAC[339]GRK              | 1 |
|                                                                                                                                                                     |      |      |      |      |   |   | 3 | LGQIFYIQSDVDFYNEKM[147]DSIVQC[339]R | 2 |
|                                                                                                                                                                     |      |      |      |      |   |   | 2 | RMSVVVRHPLSNQVVVYTK                 | 1 |
| AT12A_HUMAN (P54707) Potassium-transporting ATPase alpha chain 2 (EC 3.6.3.10) (Proton pump) (Non-gastric H(+)/K(+)-ATPase subunit alpha) [MASS=115898]             | 0.00 | 0.86 | *    | *    | * | 1 | 2 | LIIVEGC[330]QR                      | 1 |
|                                                                                                                                                                     |      |      |      |      |   |   | 3 | DGPNALTPPPTTPEWIKFC[330]R           | 1 |
|                                                                                                                                                                     |      |      |      |      |   |   | 3 | AVAGDASESALLK                       | 1 |
|                                                                                                                                                                     |      |      |      |      |   |   | 2 | C[339]SSILLHGK                      | 2 |
| AT1A1_HUMAN (P05023) Sodium/potassium-transporting ATPase alpha-1 chain precursor (EC 3.6.3.9) (Sodium pump 1) (Na+/K+ ATPase 1) [MASS=112895]                      | 1.00 | 5.57 | 1.05 | 0.08 | 7 | 4 | 2 | NIAFFSTNC[339]VEGTAR                | 1 |
|                                                                                                                                                                     |      |      |      |      |   |   | 2 | C[330]SSILLHGK                      | 1 |
|                                                                                                                                                                     |      |      |      |      |   |   | 1 | C[330]SSILLHGK                      | 2 |
|                                                                                                                                                                     |      |      |      |      |   |   | 1 | C[339]SSILLHGK                      | 1 |

|                                                                                                                                                                                                                                                                              |                                      |       |      |      |    |   |   |                                             |   |
|------------------------------------------------------------------------------------------------------------------------------------------------------------------------------------------------------------------------------------------------------------------------------|--------------------------------------|-------|------|------|----|---|---|---------------------------------------------|---|
| AT1A3_HUMAN (P13637) Sodium/potassium-transporting ATPase alpha-3 chain (EC 3.6.3.9) (Sodium pump 3) (Na+/K+ ATPase 3) (Alpha(III)) [MASS=111734]                                                                                                                            | 1.00                                 | 10.56 | 1.07 | 0.10 | 13 | 7 | 2 | KYNTDC[330]VQGLTHSK                         | 1 |
|                                                                                                                                                                                                                                                                              |                                      |       |      |      |    |   | 2 | VLGFC[339]HYLPEEQFPK                        | 1 |
|                                                                                                                                                                                                                                                                              |                                      |       |      |      |    |   | 2 | NITFFSTNC[339]VEGTAR                        | 1 |
|                                                                                                                                                                                                                                                                              |                                      |       |      |      |    |   | 1 | IISAHGC[330]JK                              | 1 |
|                                                                                                                                                                                                                                                                              |                                      |       |      |      |    |   | 1 | IISAHGC[339]JK                              | 1 |
|                                                                                                                                                                                                                                                                              |                                      |       |      |      |    |   | 2 | VLGFC[330]HYLPEEQFPK                        | 1 |
|                                                                                                                                                                                                                                                                              |                                      |       |      |      |    |   | 2 | KYNTDC[339]VQGLTHSK                         | 2 |
|                                                                                                                                                                                                                                                                              |                                      |       |      |      |    |   | 3 | VLGFC[330]HYLPEEQFPK                        | 1 |
|                                                                                                                                                                                                                                                                              |                                      |       |      |      |    |   | 2 | SPDC[339]THDNPLETR                          | 2 |
|                                                                                                                                                                                                                                                                              |                                      |       |      |      |    |   | 2 | C[330]IELSSGSVK                             | 1 |
| 2                                                                                                                                                                                                                                                                            | SPDC[330]THDNPLETR                   | 2     |      |      |    |   |   |                                             |   |
| 3                                                                                                                                                                                                                                                                            | AC[330]VIHGTDLKDFTSEQIDEILQNHTEIVFAR | 1     |      |      |    |   |   |                                             |   |
| AT1A4_HUMAN (Q13733) Sodium/potassium-transporting ATPase alpha-4 chain (EC 3.6.3.9) (Sodium pump 4) (Na+/K+ ATPase 4) [MASS=114166]                                                                                                                                         | 0.00                                 | 4.08  | *    | *    | *  | 2 | 2 | AIAKGVGIIEGTTTAEVAARLK                      | 1 |
|                                                                                                                                                                                                                                                                              |                                      |       |      |      |    |   | 3 | KEVVMDDHKLTLLEELSTK                         | 1 |
|                                                                                                                                                                                                                                                                              |                                      |       |      |      |    |   |   |                                             |   |
| AT1B1_HUMAN (P05026) Sodium/potassium-transporting ATPase subunit beta-1 (Sodium/potassium-dependent ATPase beta-1 subunit) [MASS=35061]                                                                                                                                     | 1.00                                 | 4.29  | 0.98 | 0.02 | 2  | 1 | 2 | YNPNVLPVQC[330]TGK                          | 1 |
|                                                                                                                                                                                                                                                                              |                                      |       |      |      |    |   | 2 | YNPNVLPVQC[339]TGK                          | 1 |
| AT2A2_HUMAN (P16615) Sarcoplasmic/endoplasmic reticulum calcium ATPase 2 (EC 3.6.3.8) (Calcium pump 2) (SERCA2) (SR Ca(2+)-ATPase 2) (Calcium-transporting ATPase sarcoplasmic reticulum type, slow twitch skeletal muscle isoform) (Endoplasmic reticulum cla [MASS=114756] | *                                    | 1.44  | *    | *    | *  | 1 | 2 | NYLEPGKEC[330]VQPATK                        | 1 |
| AT2A3_HUMAN (Q93084) Sarcoplasmic/endoplasmic reticulum calcium ATPase 3 (EC 3.6.3.8) (Calcium pump 3) (SERCA3) (SR Ca(2+)-ATPase 3) [MASS=113977]                                                                                                                           | 0.00                                 | 6.52  | 0.44 | 0.00 | 1  | 5 | 2 | EYEPFM[147]GKIVR                            | 1 |
|                                                                                                                                                                                                                                                                              |                                      |       |      |      |    |   | 1 | DAPPRK                                      | 1 |
|                                                                                                                                                                                                                                                                              |                                      |       |      |      |    |   | 3 | C[330]GQFDGLVELATIC[330]ALC[330]NDSALDYNEAK | 1 |
|                                                                                                                                                                                                                                                                              |                                      |       |      |      |    |   | 2 | NM[147]LFSGTNITSGK                          | 1 |
|                                                                                                                                                                                                                                                                              |                                      |       |      |      |    |   | 2 | C[339]FARVEPAHK                             | 1 |
| ATAD2_HUMAN (Q6PL18) ATPase family AAA domain-containing protein 2 [MASS=158553]                                                                                                                                                                                             | *                                    | 1.29  | *    | *    | *  | 1 | 2 | IGASLADVDP[147]QLDSSVR                      | 1 |

|                                                                                                                                                                                                    |                                      |       |      |      |   |   |   |                                       |   |
|----------------------------------------------------------------------------------------------------------------------------------------------------------------------------------------------------|--------------------------------------|-------|------|------|---|---|---|---------------------------------------|---|
| ATM_HUMAN (Q13315) Serine-protein kinase ATM (EC 2.7.11.1) (Ataxia telangiectasia mutated) (A-T, mutated) [MASS=350642]                                                                            | *                                    | 0.36  | *    | *    | * | 1 | 3 | ILPTPETVPFR                           | 1 |
| ATP8_HUMAN (P03928) ATP synthase protein 8 (EC 3.6.3.14) (ATPase subunit 8) (A6L) [MASS=7992]                                                                                                      | 0.58                                 | 16.18 | 1.10 | 0.06 | 2 | 1 | 2 | IC[330]SLHSLPPQS                      | 2 |
| ATPA_HUMAN (P25705) ATP synthase alpha chain, mitochondrial precursor (EC 3.6.3.14) [MASS=59750]                                                                                                   | 1.00                                 | 4.34  | 1.12 | 0.02 | 5 | 2 | 2 | LYC[339]IYVAIGQK                      | 1 |
|                                                                                                                                                                                                    |                                      |       |      |      |   |   | 1 | LYC[339]IYVAIGQK                      | 2 |
|                                                                                                                                                                                                    |                                      |       |      |      |   |   | 2 | KKLYC[339]IYVAIGQK                    | 1 |
|                                                                                                                                                                                                    |                                      |       |      |      |   |   | 2 | LYC[330]IYVAIGQK                      | 1 |
| ATPG_HUMAN (P36542) ATP synthase gamma chain, mitochondrial precursor (EC 3.6.3.14) [MASS=32996]                                                                                                   | 1.00                                 | 4.03  | 1.50 | 0.08 | 5 | 1 | 1 | GLC[339]GAIHSSIAK                     | 1 |
|                                                                                                                                                                                                    |                                      |       |      |      |   |   | 1 | GLC[330]GAIHSSIAK                     | 1 |
|                                                                                                                                                                                                    |                                      |       |      |      |   |   | 2 | GLC[330]GAIHSSIAK                     | 2 |
|                                                                                                                                                                                                    |                                      |       |      |      |   |   | 2 | GLC[339]GAIHSSIAK                     | 1 |
| ATS14_HUMAN (Q8WXS8) ADAMTS-14 precursor (EC 3.4.24.-) (A disintegrin and metalloproteinase with thrombospondin motifs 14) (ADAM-TS 14) (ADAM-TS14) [MASS=133871]                                  | *                                    | 1.14  | *    | *    | * | 1 | 3 | QLWC[339]SHPDNPYFC[330]K              | 1 |
| ATS16_HUMAN (Q8TE57) ADAMTS-16 precursor (EC 3.4.24.-) (A disintegrin and metalloproteinase with thrombospondin motifs 16) (ADAM-TS 16) (ADAM-TS16) [MASS=136187]                                  | 0.00                                 | 11.03 | 4.55 | 0.00 | 1 | 7 | 3 | TRPVTGLVPC[339]K                      | 1 |
|                                                                                                                                                                                                    |                                      |       |      |      |   |   | 3 | C[330]SHLPKPSLELERAC[339]APLPC[339]PR | 1 |
|                                                                                                                                                                                                    |                                      |       |      |      |   |   | 3 | KSEGNIMSPTLAGRNGVFSWSPC[339]SR        | 1 |
|                                                                                                                                                                                                    |                                      |       |      |      |   |   | 3 | PRM[147]HEAC[339]LLQRC[330]HK         | 1 |
|                                                                                                                                                                                                    |                                      |       |      |      |   |   | 3 | FM[147]PAAEGTIC[330]GHDM[147]WC[330]R | 1 |
|                                                                                                                                                                                                    |                                      |       |      |      |   |   | 2 | SHRNSSVALSTC[330]QGLSGM[147]IR        | 1 |
| 3                                                                                                                                                                                                  | AVAC[330]KSTNPSARAQLLPDAVC[339]TSEPK | 1     |      |      |   |   |   |                                       |   |
| ATS5_HUMAN (Q9UNA0) ADAMTS-5 precursor (EC 3.4.24.-) (A disintegrin and metalloproteinase with thrombospondin motifs 5) (ADAM-TS 5) (ADAM-TS5) (Aggrecanase-2) (ADMP-2) (ADAM-TS 11) [MASS=101715] | *                                    | 3.12  | *    | *    | * | 1 | 3 | DGSVGIAGFVPAGGGTSAPWRHRSHC[330]FYR    | 1 |
| ATS9_HUMAN (Q9P2N4) ADAMTS-9 precursor (EC 3.4.24.-) (A disintegrin and metalloproteinase with thrombospondin motifs 9) (ADAM-TS 9) (ADAM-TS9) [MASS=216556]                                       | 0.00                                 | 3.10  | *    | *    | * | 3 | 3 | C[339]GGYC[330]GKC[330]TPSSGTGLEVR    | 1 |
|                                                                                                                                                                                                    |                                      |       |      |      |   |   | 3 | SVQC[339]LTNEDQPSHLC[330]HTDLK        | 1 |
|                                                                                                                                                                                                    |                                      |       |      |      |   |   | 2 | SPQHVM[147]APTLNFYTNPMMWSK            | 2 |

|                                                                                                                                                                                                                                                                              |      |       |      |      |   |   |                                                                                                                |                                          |   |
|------------------------------------------------------------------------------------------------------------------------------------------------------------------------------------------------------------------------------------------------------------------------------|------|-------|------|------|---|---|----------------------------------------------------------------------------------------------------------------|------------------------------------------|---|
| AUMH_HUMAN (Q13825) Methylglutaconyl-CoA hydratase, mitochondrial precursor (EC 4.2.1.18) (AU-specific RNA-binding enoyl-CoA hydratase) (AU-binding protein/enoyl-CoA hydratase) [MASS=35608]                                                                                | 0.35 | 10.32 | 1.25 | 0.00 | 1 | 1 | 3                                                                                                              | AVINDIANLPVPTIAAIDGLALGGGLELALAC[330]DIR | 1 |
| AUP1_HUMAN (Q9Y679) Ancient ubiquitous protein 1 precursor [MASS=53028]                                                                                                                                                                                                      | 0.00 | 2.31  | 0.36 | 0.00 | 1 | 1 | 3                                                                                                              | TM[147]C[330]AVLGLVAR                    | 1 |
| B3GN3_HUMAN (Q9Y2A9) UDP-GlcNAc:betaGal beta-1,3-N-acetylglucosaminyltransferase 3 (EC 2.4.1.-) (Beta3Gn-T3) (BGnT-3) (Core 1 extending beta-1,3-N-acetylglucosaminyltransferase) (Core1-beta3GlcNAcT) (Beta-1,3-galactosyltransferase 8) (Beta-1,3-GalTase 8) [MASS=42515]  | *    | 5.38  | *    | *    | * | 1 | 3                                                                                                              | VQEQPPAIPALAWPTPPTTR                     | 1 |
| BAI1_HUMAN (O14514) Brain-specific angiogenesis inhibitor 1 precursor [MASS=173532]                                                                                                                                                                                          | *    | 0.69  | *    | *    | * | 1 | 2                                                                                                              | C[339]SWTLRNP DPR                        | 1 |
| BAZ1A_HUMAN (Q9NRL2) Bromodomain adjacent to zinc finger domain protein 1A (ATP-utilizing chromatin assembly and remodeling factor 1) (hACF1) (ATP-dependent chromatin remodelling protein) (Williams syndrome transcription factor-related chromatin remodeli [MASS=178673] | *    | 1.03  | *    | *    | * | 1 | 3                                                                                                              | LSSTSVYDLTPGEKM[147]K                    | 1 |
| BCN1_HUMAN (Q14457) Beclin-1 (Coiled-coil myosin-like BCL2-interacting protein) (Protein GT197) [MASS=51896]                                                                                                                                                                 | 0.00 | 5.56  | 0.23 | 0.00 | 1 | 2 | 3 IEDTGGSGGYSYIK<br>2 FC[330]LPYRMDVEK                                                                         | 1<br>1                                   |   |
| BCOR_HUMAN (Q6W2J9) BCoR protein (BCL-6 corepressor) [MASS=192187]                                                                                                                                                                                                           | *    | 4.33  | *    | *    | * | 4 | 3 TDVLC[330]ADEEEDC[330]QAASLLQKYTDNSEK<br>2 PNPWNQGKTVVKSDK<br>3 LLLSYGADPTLATYSGR<br>3 ADHMKKM[147]APTVLVHSR | 1<br>1<br>1<br>1                         |   |
| BIG1_HUMAN (Q9Y6D6) Brefeldin A-inhibited guanine nucleotide-exchange protein 1 (Brefeldin A-inhibited GEP 1) (p200 ARF-GEP1) (p200 ARF guanine nucleotide exchange factor) [MASS=208708]                                                                                    | 0.00 | 0.81  | 0.98 | 0.00 | 1 | 1 | 2 GWFPILFELSC[330]IINR                                                                                         | 1                                        |   |



|                                                                                                                                                                                                                                        |      |      |       |      |   |   |   |                                    |   |
|----------------------------------------------------------------------------------------------------------------------------------------------------------------------------------------------------------------------------------------|------|------|-------|------|---|---|---|------------------------------------|---|
| BIG2_HUMAN (Q9Y6D5) Brefeldin A-inhibited guanine nucleotide-exchange protein 2 (Brefeldin A-inhibited GEP 2) [MASS=202092]                                                                                                            | 0.00 | 2.07 | *     | *    | * | 2 | 2 | PLGEGPPDPKSHELR                    | 1 |
|                                                                                                                                                                                                                                        |      |      |       |      |   |   | 3 | TTIPHVLLTWRPVGMEEDSSEK             | 1 |
| BIRC6_HUMAN (Q9NR09) Baculoviral IAP repeat-containing protein 6 (Ubiquitin-conjugating BIR-domain enzyme apollon) [MASS=527606]                                                                                                       | *    | 0.66 | *     | *    | * | 2 | 3 | EKSSNVKNENTSGTR                    | 1 |
|                                                                                                                                                                                                                                        |      |      |       |      |   |   | 2 | IRLHTGLLLLVQLC[339]GGER            | 1 |
| BKRB2_HUMAN (P30411) B2 bradykinin receptor (BK-2 receptor) (B2R) [MASS=44460]                                                                                                                                                         | 0.45 | 6.14 | 0.57  | 0.00 | 1 | 1 | 3 | VVNAIISMNLYSSIC[330]FLM[147]LVSIDR | 1 |
| BMP1_HUMAN (P13497) Bone morphogenetic protein 1 precursor (EC 3.4.24.19) (BMP-1) (Procollagen C-proteinase) (PCP) (Mammalian tolloid protein) (mTld) [MASS=111248]                                                                    | *    | 5.48 | *     | *    | * | 3 | 3 | AATSRPERVWPDGVIPFVIGGNFTGSQR       | 1 |
|                                                                                                                                                                                                                                        |      |      |       |      |   |   | 3 | C[339]EAAC[339]GGFLTK              | 1 |
|                                                                                                                                                                                                                                        |      |      |       |      |   |   | 2 | DYGHIQSPNYPDDYR                    | 1 |
| BOC_HUMAN (Q9BWV1) Brother of CDO precursor (Protein BOC) [MASS=121059]                                                                                                                                                                | *    | 2.24 | *     | *    | * | 1 | 3 | VYERPVAGPYITFTDAVNETTIMLK          | 1 |
| BPAEB_HUMAN (Q8W XK8) Bullous pemphigoid antigen 1, isoform 7 (Bullous pemphigoid antigen) (BPA) (Hemidesmosomal plaque protein) (Dystonia musculorum protein) (Dystonin) (Fragment) [MASS=344987]                                     | *    | 0.65 | *     | *    | * | 1 | 2 | LINSQFFPQITNNEELNQK                | 1 |
| BRCA2_HUMAN (P51587) Breast cancer type 2 susceptibility protein (Fanconi anemia group D1 protein) [MASS=384223]                                                                                                                       | 0.00 | 1.78 | 0.18  | 0.00 | 1 | 4 | 2 | DLELAC[330]ETIEITAAPK              | 1 |
|                                                                                                                                                                                                                                        |      |      |       |      |   |   | 3 | KPSYILQKSTFEVPENQMTILK             | 1 |
|                                                                                                                                                                                                                                        |      |      |       |      |   |   | 1 | LSGQFMK                            | 1 |
|                                                                                                                                                                                                                                        |      |      |       |      |   |   | 2 | QKQNIIDGHGSDDSKNK                  | 1 |
| BRD1_HUMAN (O95696) Bromodomain-containing protein 1 (BR140-like protein) [MASS=119519]                                                                                                                                                | 0.00 | 4.06 | 14.44 | 0.00 | 1 | 2 | 3 | SEQEPGGGLGRKATPR                   | 1 |
|                                                                                                                                                                                                                                        |      |      |       |      |   |   | 3 | ISIFDPLEIILEDLTAQEMSEC[339]NSNK    | 1 |
| BSN_HUMAN (Q9UPA5) Bassoon protein (Zinc-finger protein 231) [MASS=416365]                                                                                                                                                             | *    | 1.25 | *     | *    | * | 3 | 3 | ASPLPSKASPQAKPLR                   | 1 |
|                                                                                                                                                                                                                                        |      |      |       |      |   |   | 2 | TPSSVQEKKTR                        | 1 |
|                                                                                                                                                                                                                                        |      |      |       |      |   |   | 2 | IADSSVQTDEEDGESRYLLSRR             | 1 |
| BTAF1_HUMAN (O14981) TATA-binding protein-associated factor 172 (EC 3.6.1.-) (ATP-dependent helicase BTAF1) (TBP-associated factor 172) (TAF-172) (TAF(II)170) (B-TFIID transcription factor-associated 170 kDa subunit) [MASS=206886] | *    | 3.95 | *     | *    | * | 5 | 3 | SALQRISVALVIC[339]EWAALQK          | 1 |
|                                                                                                                                                                                                                                        |      |      |       |      |   |   | 2 | ETC[330]AQTLGVVLKHMNETGVHK         | 1 |
|                                                                                                                                                                                                                                        |      |      |       |      |   |   | 1 | HGAGTGLR                           | 2 |
|                                                                                                                                                                                                                                        |      |      |       |      |   |   | 2 | EQEAGVLMAMDALHR                    | 1 |
|                                                                                                                                                                                                                                        |      |      |       |      |   |   | 2 | LLTQEQWEVR                         | 1 |

|                                                                                                                                                                                                                                                                              |      |      |       |      |   |   |   |                                       |   |
|------------------------------------------------------------------------------------------------------------------------------------------------------------------------------------------------------------------------------------------------------------------------------|------|------|-------|------|---|---|---|---------------------------------------|---|
| C1QBP_HUMAN (Q07021) Complement component 1 Q subcomponent-binding protein, mitochondrial precursor (Glycoprotein gC1qBP) (C1qBP) (GC1q-R protein) (Hyaluronan-binding protein 1) (Mitochondrial matrix protein p32) (p33) [MASS=31362]                                      | 1.00 | 9.57 | 1.53  | 0.03 | 2 | 1 | 2 | ALVLDC[339]HYPEDEVGQEDEAESDIFSIR      | 1 |
|                                                                                                                                                                                                                                                                              |      |      |       |      |   |   | 3 | ALVLDC[339]HYPEDEVGQEDEAESDIFSIR      | 1 |
|                                                                                                                                                                                                                                                                              |      |      |       |      |   |   |   |                                       |   |
| C1QC_HUMAN (P02747) Complement C1q subcomponent subunit C precursor [MASS=25773]                                                                                                                                                                                             | *    | 4.49 | *     | *    | * | 1 | 2 | LLLLLLLLPLR                           | 1 |
| C560_HUMAN (Q99643) Succinate dehydrogenase cytochrome b560 subunit, mitochondrial precursor (Integral membrane protein CII-3) (QPs1) (QPs-1) (Succinate dehydrogenase complex subunit C) (Succinate-ubiquinone oxidoreductase cytochrome B large subunit) (CY [MASS=18610]) | 1.00 | 7.69 | 1.51  | 0.00 | 2 | 1 | 2 | SLC[330]LGPALIHTAK                    | 1 |
|                                                                                                                                                                                                                                                                              |      |      |       |      |   |   | 2 | SLC[339]LGPALIHTAK                    | 1 |
| CABL2_HUMAN (Q9BTV7) CDK5 and ABL1 enzyme substrate 2 (Interactor with CDK3 2) (Ik3-2) [MASS=52235]                                                                                                                                                                          | 0.00 | 3.56 | 2.28  | 0.00 | 1 | 1 | 2 | RSLC[339]AAFSVLPYGEGLR                | 1 |
| CAC1S_HUMAN (Q13698) Voltage-dependent L-type calcium channel subunit alpha-1S (Voltage-gated calcium channel subunit alpha Cav1.1) (Calcium channel, L type, alpha-1 polypeptide, isoform 3, skeletal muscle) [MASS=212163]                                                 | *    | 0.48 | *     | *    | * | 1 | 2 | VESSM[147]PEDR                        | 1 |
| CAD17_HUMAN (Q12864) Cadherin-17 precursor (Liver-intestine-cadherin) (LI-cadherin) (Intestinal peptide-associated transporter HPT-1) [MASS=92148]                                                                                                                           | *    | 2.28 | *     | *    | * | 2 | 2 | INGTHARLSTR                           | 1 |
|                                                                                                                                                                                                                                                                              |      |      |       |      |   |   | 1 | YNASSFAK                              | 1 |
| CALI_HUMAN (Q13939) Calicin [MASS=66555]                                                                                                                                                                                                                                     | 0.00 | 1.70 | 18.28 | 0.00 | 1 | 1 | 3 | PC[339]SLLVYQRK                       | 1 |
| CALX_HUMAN (P27824) Calnexin precursor (Major histocompatibility complex class I antigen-binding protein p88) (p90) (IP90) [MASS=67568]                                                                                                                                      | 0.31 | 5.41 | 4.37  | 0.00 | 1 | 1 | 3 | LNKPFLFDTKPLIVQYEVNFQNGIEC[339]GGAYVK | 1 |
| CATA_HUMAN (P04040) Catalase (EC 1.11.1.6) [MASS=59625]                                                                                                                                                                                                                      | *    | 1.14 | *     | *    | * | 1 | 1 | TDQGIK                                | 1 |

|                                                                                                                                                                                                                                                                              |      |       |      |      |   |   |   |                                          |   |
|------------------------------------------------------------------------------------------------------------------------------------------------------------------------------------------------------------------------------------------------------------------------------|------|-------|------|------|---|---|---|------------------------------------------|---|
| CATD_HUMAN (P07339) Cathepsin D precursor (EC 3.4.23.5) [Contains: Cathepsin D light chain; Cathepsin D heavy chain] [MASS=44552]                                                                                                                                            | *    | 3.88  | *    | *    | * | 1 | 2 | RTM[147]SEVGGSVEDLIAK                    | 1 |
| CATS_HUMAN (P25774) Cathepsin S precursor (EC 3.4.22.27) [MASS=37495]                                                                                                                                                                                                        | *    | 3.02  | *    | *    | * | 1 | 2 | NITYKSNPNR                               | 1 |
| CC020_HUMAN (Q8ND61) Protein C3orf20 [MASS=101268]                                                                                                                                                                                                                           | *    | 3.65  | *    | *    | * | 2 | 3 | SQSGHLESSIAETLKDEPESAPVSPVR              | 1 |
|                                                                                                                                                                                                                                                                              |      |       |      |      |   |   | 1 | KIGKSR                                   | 1 |
| CC28B_HUMAN (Q9BUN5) Coiled-coil domain-containing protein 28B [MASS=26904]                                                                                                                                                                                                  | *    | 2.49  | *    | *    | * | 1 | 1 | LQAFGK                                   | 1 |
| CCD22_HUMAN (O60826) Coiled-coil domain-containing protein 22 [MASS=70755]                                                                                                                                                                                                   | *    | 4.15  | *    | *    | * | 2 | 3 | TLGVSVFVQAESEC[339]RHSK                  | 1 |
|                                                                                                                                                                                                                                                                              |      |       |      |      |   |   | 2 | DAKKDDAVR                                | 1 |
| CCD94_HUMAN (Q9BW85) Coiled-coil domain-containing protein 94 [MASS=37086]                                                                                                                                                                                                   | *    | 10.22 | *    | *    | * | 2 | 2 | ETVQNEVYLGPIFR                           | 1 |
|                                                                                                                                                                                                                                                                              |      |       |      |      |   |   | 3 | LM[147]APFNM[147]RC[339]KTC[339]GEYIYK   | 1 |
| CCNT2_HUMAN (O60583) Cyclin-T2 (CycT2) [MASS=81028]                                                                                                                                                                                                                          | *    | 2.33  | *    | *    | * | 1 | 3 | DTFDM[147]LDSLLSAQGM[147]NM[147]         | 1 |
| CD20_HUMAN (P11836) B-lymphocyte antigen CD20 (B-lymphocyte surface antigen B1) (Leu-16) (Bp35) [MASS=33077]                                                                                                                                                                 | *    | 11.45 | *    | *    | * | 2 | 1 | KC[339]LVK GK                            | 1 |
|                                                                                                                                                                                                                                                                              |      |       |      |      |   |   | 3 | M[147]ESLNFIRAHTPYINIYNC[330]EPANPSEK    | 1 |
| CD34_HUMAN (P28906) Hematopoietic progenitor cell antigen CD34 precursor [MASS=40716]                                                                                                                                                                                        | *    | 10.65 | *    | *    | * | 2 | 1 | GARAGPR                                  | 3 |
|                                                                                                                                                                                                                                                                              |      |       |      |      |   |   | 3 | TLIALVTSGALLAVLGITGYFLM[147]NRRSWSP TGER | 1 |
| CD59_HUMAN (P13987) CD59 glycoprotein precursor (Membrane attack complex inhibition factor) (MACIF) (MAC-inhibitory protein) (MAC-IP) (Protectin) (MEM43 antigen) (Membrane inhibitor of reactive lysis) (MIRL) (20 kDa homologous restriction factor) (HRF-20) [MASS=14177] | 1.00 | 9.38  | 0.74 | 0.29 | 5 | 1 | 2 | LRENELTYYC[330]C[330]K                   | 2 |
|                                                                                                                                                                                                                                                                              |      |       |      |      |   |   | 2 | LRENELTYYC[339]C[339]K                   | 3 |
| CD72_HUMAN (P21854) B-cell differentiation antigen CD72 (Lyb-2) [MASS=40220]                                                                                                                                                                                                 | 0.00 | 3.90  | 3.80 | 0.00 | 1 | 1 | 2 | AVTSPAVGRILPC[339]R                      | 1 |
| CD81_HUMAN (P60033) CD81 antigen (26 kDa cell surface protein TAPA-1) (Target of the antiproliferative antibody 1) (Tetraspanin-28) (Tspan-28) [MASS=25809]                                                                                                                  | *    | 11.86 | *    | *    | * | 1 | 3 | DQIAKDVKQFYDQALQQAVVDDDANNAK             | 1 |

|                                                                                                                                                                                                                                                               |      |       |      |      |   |   |   |                                          |   |
|---------------------------------------------------------------------------------------------------------------------------------------------------------------------------------------------------------------------------------------------------------------|------|-------|------|------|---|---|---|------------------------------------------|---|
| CD82_HUMAN (P27701) CD82 antigen (Inducible membrane protein R2) (C33 antigen) (IA4) (Metastasis suppressor Kangai 1) (Suppressor of tumorigenicity-6) (Tetraspanin-27) (Tspan-27) [MASS=29625]                                                               | 0.00 | 7.49  | 0.29 | 0.00 | 1 | 1 | 2 | TQSGNHPEWVQYQEGC[330]M[147]EK            | 1 |
| CD9_HUMAN (P21926) CD9 antigen (p24) (Leukocyte antigen MIC3) (Motility-related protein) (MRP-1) (Tetraspanin-29) (Tspan-29) [MASS=25285]                                                                                                                     | 1.00 | 11.01 | 0.14 | 0.10 | 2 | 1 | 3 | AIHYALNC[339]C[339]GLAGGVEQFISDIC[339]PK | 1 |
|                                                                                                                                                                                                                                                               |      |       |      |      |   |   | 3 | AIHYALNC[330]C[330]GLAGGVEQFISDIC[330]PK | 1 |
| CDC42_HUMAN (P60953) Cell division control protein 42 homolog precursor (G25K GTP-binding protein) [MASS=21310]                                                                                                                                               | 0.99 | 14.14 | 0.45 | 0.00 | 1 | 2 | 3 | AVKYVEC[339]SALTQRGLK                    | 1 |
|                                                                                                                                                                                                                                                               |      |       |      |      |   |   | 2 | WVPEITHHC[330]PK                         | 1 |
| CENG1_HUMAN (Q99490) Centaurin-gamma 1 (ARF-GAP with GTP-binding protein-like, ankyrin repeat and pleckstrin homology domains 2) (AGAP-2) (Phosphatidylinositol-3-kinase enhancer) (PIKE) (GTP-binding and GTPase-activating protein 2) (GGAP2) [MASS=124673] | 1.00 | 1.85  | 3.80 | 0.02 | 4 | 1 | 2 | DAWVQAIESQILASLQC[339]C[339]ESSK         | 1 |
|                                                                                                                                                                                                                                                               |      |       |      |      |   |   | 3 | DAWVQAIESQILASLQC[339]C[339]ESSK         | 3 |
|                                                                                                                                                                                                                                                               |      |       |      |      |   |   |   |                                          |   |
| CENPF_HUMAN (P49454) CENP-F kinetochore protein (Centromere protein F) (Mitosin) (AH antigen) [MASS=367592]                                                                                                                                                   | 0.00 | 0.28  | 0.65 | 0.00 | 1 | 1 | 2 | LEQELKRC[339]K                           | 1 |
| CEP70_HUMAN (Q8NHQ1) Centrosomal protein of 70 kDa (Cep70 protein) (p10-binding protein) [MASS=69751]                                                                                                                                                         | 0.00 | 7.37  | 1.29 | 0.00 | 1 | 2 | 3 | QQEEAEWESINVLLM[147]MHGLKPLSLVKR         | 1 |
|                                                                                                                                                                                                                                                               |      |       |      |      |   |   | 2 | RTEQEETIASLQMEVC[330]R                   | 1 |
| CEZ2_HUMAN (Q8TE49) Zinc finger A20 domain-containing protein ? (EC 3.-.-.) (Zinc finger protein Cezanne 2) (OTU domain-containing protein 7) [MASS=100676]                                                                                                   | *    | 1.84  | *    | *    | * | 1 | 3 | MGRANSANGKNGDSAER                        | 1 |
| CF096_HUMAN (Q9NWS8) Protein C6orf96 [MASS=51604]                                                                                                                                                                                                             | 0.00 | 5.79  | 0.57 | 0.00 | 1 | 1 | 3 | LNSELDLDDAILEKFAFSNALC[330]LSVK          | 1 |
| CGL_HUMAN (P32929) Cystathionine gamma-lyase (EC 4.4.1.1) (Gamma-cystathionase) [MASS=44508]                                                                                                                                                                  | *    | 8.40  | *    | *    | * | 1 | 3 | HGDIILVDNTFM[147]SPYFQRPLALGADISMYSATK   | 1 |

|                                                                                                                                                                                                                                                                              |      |       |      |      |   |   |   |                               |   |
|------------------------------------------------------------------------------------------------------------------------------------------------------------------------------------------------------------------------------------------------------------------------------|------|-------|------|------|---|---|---|-------------------------------|---|
| CH60_HUMAN (P10809) 60 kDa heat shock protein, mitochondrial precursor (Hsp60) (60 kDa chaperonin) (CPN60) (Heat shock protein 60) (HSP-60) (Mitochondrial matrix protein P1) (P60 lymphocyte protein) (HuCHA60) [MASS=61054]                                                | 0.99 | 6.28  | 1.24 | 0.04 | 2 | 2 | 3 | DPGM[147]GAM[147]GGMGGGMGGGMF | 2 |
|                                                                                                                                                                                                                                                                              |      |       |      |      |   |   | 2 | AAVEEGIVLGGGC[339]ALLR        | 2 |
| CHCH3_HUMAN (Q9NX63) Coiled-coil-helix-coiled-coil-helix domain-containing protein 3 [MASS=26152]                                                                                                                                                                            | 0.99 | 5.73  | 1.33 | 0.00 | 1 | 1 | 2 | YESHPVC[339]ADLQAK            | 1 |
| CHCH6_HUMAN (Q9BRQ6) Coiled-coil-helix-coiled-coil-helix domain-containing protein 6 [MASS=26458]                                                                                                                                                                            | 1.00 | 5.96  | 1.20 | 0.00 | 2 | 1 | 2 | DRPHEVLLC[330]SDLVK           | 1 |
|                                                                                                                                                                                                                                                                              |      |       |      |      |   |   | 2 | DRPHEVLLC[339]SDLVK           | 1 |
| CHD6_HUMAN (Q8TD26) Chromodomain-helicase-DNA-binding protein 6 (EC 3.6.1.-) (ATP-dependent helicase CHD6) (CHD-6) (Radiation-induced gene B protein) [MASS=305410]                                                                                                          | 0.00 | 1.22  | 1.37 | 0.00 | 1 | 2 | 3 | KMTSHNGM[147]EDSGGGGTGVKK     | 1 |
|                                                                                                                                                                                                                                                                              |      |       |      |      |   |   | 2 | KNC[339]ILADEM[147]GLGK       | 1 |
| CHD9_HUMAN (Q3L8U1) Chromodomain-helicase-DNA-binding protein 9 (EC 3.6.1.-) (ATP-dependent helicase CHD9) (CHD-9) (Chromatin-related mesenchymal modulator) (CReMM) (Chromatin remodeling factor CHROM1) (Peroxisomal proliferator-activated receptor A-inter [MASS=326004] | *    | 0.38  | *    | *    | * | 1 | 3 | C[339]ETDRRMVAAR              | 1 |
| CHX10_HUMAN (P58304) Homeobox protein CHX10 (Ceh-10 homeodomain-containing homolog) [MASS=39410]                                                                                                                                                                             | *    | 5.26  | *    | *    | * | 1 | 2 | C[339]WGRSSVM[147]AEYGLYGAMVR | 1 |
|                                                                                                                                                                                                                                                                              |      |       |      |      |   |   | 1 | LPC[339]VAAK                  | 2 |
| CISY_HUMAN (O75390) Citrate synthase, mitochondrial precursor (EC 2.3.3.1) [MASS=51712]                                                                                                                                                                                      | 1.00 | 3.43  | 1.21 | 0.02 | 3 | 2 | 1 | GFSIPEC[330]QK                | 1 |
|                                                                                                                                                                                                                                                                              |      |       |      |      |   |   | 1 | LPC[330]VAAK                  | 2 |
|                                                                                                                                                                                                                                                                              |      |       |      |      |   |   | 2 | KFPFC[330]DGAHTK              | 1 |
|                                                                                                                                                                                                                                                                              |      |       |      |      |   |   | 2 | FPFC[339]DGAHTK               | 1 |
|                                                                                                                                                                                                                                                                              |      |       |      |      |   |   | 1 | KFPFC[330]DGAHTK              | 1 |
| CJ070_HUMAN (Q9NZ45) Protein C10orf70 [MASS=12199]                                                                                                                                                                                                                           | 1.00 | 36.11 | 1.25 | 0.05 | 7 | 3 | 1 | KFPFC[339]DGAHTK              | 1 |
|                                                                                                                                                                                                                                                                              |      |       |      |      |   |   | 2 | KFPFC[339]DGAHTK              | 1 |
|                                                                                                                                                                                                                                                                              |      |       |      |      |   |   | 3 | IVHAFDM[147]EDLGDKAVYC[339]R  | 1 |
|                                                                                                                                                                                                                                                                              |      |       |      |      |   |   | 2 | FPFC[330]DGAHTK               | 1 |

|                                                                                                                                                                                                |      |       |      |      |    |   |                                                                                                                                                                                                                                                                                                  |                                                |        |
|------------------------------------------------------------------------------------------------------------------------------------------------------------------------------------------------|------|-------|------|------|----|---|--------------------------------------------------------------------------------------------------------------------------------------------------------------------------------------------------------------------------------------------------------------------------------------------------|------------------------------------------------|--------|
| CK002_HUMAN (Q9UID3) Protein C11orf2<br>(Another new gene 2 protein) [MASS=86042]                                                                                                              | *    | 2.56  | *    | *    | *  | 1 | 2                                                                                                                                                                                                                                                                                                | RLAQEQGGGDNSLLVRALDR                           | 1      |
| CL011_HUMAN (Q9NVM9) Protein C12orf11<br>(Sarcoma antigen NY-SAR-95) [MASS=80225]                                                                                                              | *    | 1.42  | *    | *    | *  | 1 | 3                                                                                                                                                                                                                                                                                                | GRIIC[330]ITNAK                                | 1      |
| CLH1_HUMAN (Q00610) Clathrin heavy chain<br>1 (CLH-17) [MASS=191482]                                                                                                                           | 1.00 | 2.57  | 1.38 | 0.07 | 2  | 3 | 2 IHEGC[339]EEPATHNALAK<br>2 YESLELC[339]RPVLQQGR<br>3 VKQLPLVKPYLR                                                                                                                                                                                                                              | 1<br>1<br>1                                    |        |
| CLH2_HUMAN (P53675) Clathrin heavy chain<br>2 (CLH-22) [MASS=187029]                                                                                                                           | *    | 0.37  | *    | *    | *  | 1 | 1                                                                                                                                                                                                                                                                                                | KDHLYK                                         | 1      |
| CLIC4_HUMAN (Q9Y696) Chloride intracellular<br>channel protein 4 (Intracellular chloride ion<br>channel protein p64H1) [MASS=28641]                                                            | 0.42 | 7.14  | 1.02 | 0.00 | 1  | 1 | 2                                                                                                                                                                                                                                                                                                | TDVNKIEEFLEEVLC[339]PPK                        | 1      |
| CMC1_HUMAN (O75746) Calcium-binding<br>mitochondrial carrier protein Aralar1<br>(Mitochondrial aspartate glutamate carrier 1)<br>(Solute carrier family 25 member 12)<br>[MASS=74755]          | 0.73 | 3.54  | 0.96 | 0.06 | 2  | 2 | 2                                                                                                                                                                                                                                                                                                | DIPFSAIFPVYAH[C339]K<br>2 GTAARVFR             | 2<br>1 |
| CMC2_HUMAN (Q9UJS0) Calcium-binding<br>mitochondrial carrier protein Aralar2<br>(Mitochondrial aspartate glutamate carrier 2)<br>(Solute carrier family 25 member 13) (Citrin)<br>[MASS=74175] | 0.35 | 2.37  | 1.12 | 0.00 | 1  | 1 | 2                                                                                                                                                                                                                                                                                                | DIPFSAIFPC[339]YAHVK<br>2 RPPGVLHC[339]TTK     | 1<br>3 |
| CN37_HUMAN (P09543) 2',3'-cyclic-nucleotide<br>3'-phosphodiesterase (EC 3.1.4.37) (CNP)<br>(CNPase) [MASS=47578]                                                                               | 1.00 | 19.71 | 1.06 | 0.07 | 16 | 5 | 1 RPPGVLHC[330]TTK<br>2 LDEDLAAYC[330]R<br>3 DKPELQFPFLQDEDTVATLLEC[339]K<br>2 RLDEDLAAYC[330]R<br>2 DKPELQFPFLQDEDTVATLLEC[339]K<br>3 AHITLGC[330]AADVEAVQTGLDLLEILRQEK<br>1 LDEDLAAYC[330]R<br>2 RLDEDLAAYC[339]R<br>1 LDEDLAAYC[339]R<br>2 DKPELQFPFLQDEDTVATLLEC[330]K<br>2 RPPGVLHC[330]TTK | 1<br>1<br>1<br>1<br>2<br>1<br>1<br>1<br>1<br>2 |        |

|                                                                                                                                                                                                                                                                |      |      |      |      |   |   |   |                                                                      |        |
|----------------------------------------------------------------------------------------------------------------------------------------------------------------------------------------------------------------------------------------------------------------|------|------|------|------|---|---|---|----------------------------------------------------------------------|--------|
| CND1_HUMAN (Q15021) Condensin complex subunit 1 (Chromosome condensation-related SMC-associated protein 1) (Chromosome-associated protein D2) (hCAP-D2) (XCAP-D2 homolog) [MASS=157168]                                                                        | 0.00 | 3.50 | 2.12 | 0.00 | 1 | 2 | 3 | VPAILMSSM[147]C[339]ILLDHLGGENYMM[147]R<br>LLESFETMASQTNLVDLDLGGKGGK | 1<br>1 |
| CNGB3_HUMAN (Q9NQW8) Cyclic nucleotide-gated cation channel beta 3 (CNG channel beta 3) (Cyclic nucleotide-gated channel beta 3) (Cone photoreceptor cGMP-gated channel subunit beta) (Cyclic nucleotide-gated cation channel modulatory subunit) [MASS=92249] | *    | 1.73 | *    | *    | * | 1 | 3 | DVIGAATANQNYFR                                                       | 1      |
| CO2_HUMAN (P06681) Complement C2 precursor (EC 3.4.21.43) (C3/C5 convertase) [Contains: Complement C2b fragment; Complement C2a fragment] [MASS=83267]                                                                                                         | *    | 3.46 | *    | *    | * | 1 | 3 | MGVEWTSC[330]AEVVSQEKT[147]FPNLTDVR                                  | 1      |
| CO3A1_HUMAN (P02461) Collagen alpha-1(III) chain precursor [MASS=138554]                                                                                                                                                                                       | 0.00 | 7.71 | 0.95 | 0.00 | 1 | 5 | 3 | GEGGPPGVAGPPGGSGPAGPPGPQGVK                                          | 1      |
|                                                                                                                                                                                                                                                                |      |      |      |      |   |   | 2 | DGTSGHGPGPIGPPGPR                                                    | 1      |
|                                                                                                                                                                                                                                                                |      |      |      |      |   |   | 2 | GGAGEPGKNGAKGEPGPR                                                   | 1      |
|                                                                                                                                                                                                                                                                |      |      |      |      |   |   | 3 | GFPGNPGAPGSPGAGQQGAIGSPGAGPR                                         | 1      |
|                                                                                                                                                                                                                                                                |      |      |      |      |   |   | 3 | VFC[339]NM[147]ETGETC[339]ISANPLNVPRK                                | 1      |
| CO6A2_HUMAN (P12110) Collagen alpha-2(VI) chain precursor [MASS=108573]                                                                                                                                                                                        | *    | 2.36 | *    | *    | * | 1 | 3 | QFVPQFISQLQNEFYLDQVALSWR                                             | 1      |
|                                                                                                                                                                                                                                                                |      |      |      |      |   |   | 3 | GNPGEPGLNGTTGPK                                                      | 1      |
|                                                                                                                                                                                                                                                                |      |      |      |      |   |   | 3 | AC[330]C[339]GVPC[330]KC[330]SGQR                                    | 1      |
|                                                                                                                                                                                                                                                                |      |      |      |      |   |   | 3 | IKNLQVALTSKQQSLETAM[147]SFVAR                                        | 1      |
|                                                                                                                                                                                                                                                                |      |      |      |      |   |   | 3 | RDIVFLVDGSSALGLANFNPAIR                                              | 1      |
| CO6A3_HUMAN (P12111) Collagen alpha-3(VI) chain precursor [MASS=343550]                                                                                                                                                                                        | *    | 4.06 | *    | *    | * | 7 | 3 | SASSSTINLM[147]VSTEPLALTETDIC[330]K                                  | 1      |
|                                                                                                                                                                                                                                                                |      |      |      |      |   |   | 1 | VAVVQYSDR                                                            | 1      |
|                                                                                                                                                                                                                                                                |      |      |      |      |   |   | 2 | FWYGGC[330]GGNENKFGSQKEC[339]EK                                      | 1      |
|                                                                                                                                                                                                                                                                |      |      |      |      |   |   | 3 | QVC[339]EQLIQSHM[147]AR                                              | 1      |
| COE1_HUMAN (Q05707) Collagen alpha-1(XIV) chain precursor (Undulin) [MASS=193484]                                                                                                                                                                              | *    | 0.72 | *    | *    | * | 1 | 3 | QVC[339]EQLIQSHM[147]AR                                              | 1      |
| COG1_HUMAN (Q8WTW3) Conserved oligomeric Golgi complex component 1 [MASS=108978]                                                                                                                                                                               | 0.00 | 1.53 | 0.81 | 0.00 | 1 | 1 | 2 | QC[330]ILGKSESSEKPAR                                                 | 1      |

|                                                                                                                                                                                                                         |      |       |      |      |   |   |                  |                                                                                                                             |                  |
|-------------------------------------------------------------------------------------------------------------------------------------------------------------------------------------------------------------------------|------|-------|------|------|---|---|------------------|-----------------------------------------------------------------------------------------------------------------------------|------------------|
| COPG2_HUMAN (Q9UBF2) Coatomer subunit gamma-2 (Gamma-2 coat protein) (Gamma-2 COP) [MASS=97622]                                                                                                                         | *    | 2.76  | *    | *    | * | 2 | 3<br>1           | ALC[339]RITDGTMLQAIER<br>TLNKVAM[147]K                                                                                      | 1<br>4           |
| COX5B_HUMAN (P10606) Cytochrome c oxidase polypeptide Vb, mitochondrial precursor (EC 1.9.3.1) [MASS=13696]                                                                                                             | 0.93 | 4.65  | 1.37 | 0.04 | 3 | 1 | 1                | C[339]GAHYK                                                                                                                 | 5                |
| COX7C_HUMAN (P15954) Cytochrome c oxidase polypeptide VIIc, mitochondrial precursor (EC 1.9.3.1) [MASS=7245]                                                                                                            | 1.00 | 26.98 | 1.10 | 0.06 | 3 | 1 | 2<br>2<br>2      | M[147]C[330]LYFGSAFATPFLVVR<br>M[147]C[339]LYFGSAFATPFLVVR<br>MC[330]LYFGSAFATPFLVVR                                        | 1<br>1<br>1      |
| CPSF7_HUMAN (Q8N684) Cleavage and polyadenylation specificity factor 7 (Cleavage and polyadenylation specificity factor 59 kDa subunit) (CPSF 59 kDa subunit) (Pre-mRNA cleavage factor 1m 59 kDa subunit) [MASS=52050] | 0.57 | 1.70  | 1.69 | 0.00 | 1 | 1 | 1                | REC[339]VRVPR                                                                                                               | 2                |
| CSK12_HUMAN (Q8WXE0) Caskin-2 [MASS=126710]                                                                                                                                                                             | 0.00 | 2.58  | 1.22 | 0.00 | 1 | 2 | 1<br>3           | VGIPAAR<br>VPGAGTAPKPVSVAC[339]TQLAFSGPK                                                                                    | 1<br>1           |
| CSMD1_HUMAN (Q96PZ7) CUB and sushi domain-containing protein 1 precursor (CUB and sushi multiple domains protein 1) [MASS=388867]                                                                                       | 0.00 | 2.27  | 0.24 | 0.00 | 1 | 4 | 3<br>3<br>2<br>2 | DTVVYQC[330]NPGFRLVGTSVRIC[330]LQDHK<br>RGTILSPGYPEPYGNLNC[330]IWK<br>EAC[330]FDPGNIM[147]NGTRVGTDFK<br>C[339]RKGHYHIQGSTTR | 1<br>1<br>1<br>1 |
| CSPG2_HUMAN (P13611) Versican core protein precursor (Large fibroblast proteoglycan) (Chondroitin sulfate proteoglycan core protein 2) (PG-M) (Glial hyaluronate-binding protein) (GHAP) [MASS=372817]                  | *    | 2.03  | *    | *    | * | 4 | 2<br>3<br>2<br>2 | TEIELFPYSGDK<br>EFPVTEPLVTARMILESK<br>AVTADGFPTVSVMLPLHSEQNK<br>SPFM[147]GKTEEEVFSGMK                                       | 1<br>1<br>1<br>1 |
| CT012_HUMAN (Q9NVP4) Protein C20orf12 [MASS=62909]                                                                                                                                                                      | 0.00 | 6.91  | 6.54 | 0.00 | 1 | 3 | 2<br>2<br>2      | PLLTISPGR<br>C[339]GASNHLSAR<br>DIGTQTVGLFYPSGKLLAKK                                                                        | 1<br>1<br>1      |
| CT152_HUMAN (Q96M20) Uncharacterized protein C20orf152 [MASS=67512]                                                                                                                                                     | *    | 9.90  | *    | *    | * | 3 | 1<br>3<br>3      | MLGPKIQSRPAQSIK<br>FSYQQLISKDFGESPFIMFISKGSC[339]EVLV<br>PLILM[147]SLGNELIR                                                 | 1<br>1<br>1      |
| CTCF_HUMAN (P49711) Transcriptional repressor CTCF (CCCTC-binding factor) (CTCFL paralog) (11-zinc finger protein) [MASS=82785]                                                                                         | 0.00 | 5.78  | 1.99 | 0.00 | 1 | 2 | 3<br>3           | FTQSGTMKMHILQKHTENVAK<br>HADNC[339]AGPDGVEGENGETTK                                                                          | 1<br>1           |



|                                                                                                                                                                                                                                                                            |      |       |      |      |   |   |   |                                           |   |
|----------------------------------------------------------------------------------------------------------------------------------------------------------------------------------------------------------------------------------------------------------------------------|------|-------|------|------|---|---|---|-------------------------------------------|---|
| CU109_HUMAN (Q8TD88) Protein C21orf109 [MASS=6031]                                                                                                                                                                                                                         | 0.00 | 33.33 | 0.29 | 0.00 | 1 | 1 | 3 | MTIWMTQEGC[330]NSGLGEK                    | 1 |
| CX020_HUMAN (Q8NDZ0) Protein CXorf20 [MASS=87918]                                                                                                                                                                                                                          | *    | 2.38  | *    | *    | * | 1 | 3 | DGGEGC[330]SWM[147]FQPMNNSKM[147]R        | 1 |
| CX022_HUMAN (Q6ZTR5) Protein CXorf22 [MASS=110392]                                                                                                                                                                                                                         | *    | 2.66  | *    | *    | * | 1 | 3 | QNC[330]C[330]AQFQWQPVNTGRGIAFSIC[339]PSK | 1 |
| CX6B1_HUMAN (P14854) Cytochrome c oxidase subunit VIb isoform 1 (EC 1.9.3.1) (COX VIb-1) [MASS=10061]                                                                                                                                                                      | 0.99 | 12.94 | 1.28 | 0.00 | 1 | 1 | 2 | NC[339]WQNYLDFHR                          | 1 |
| CY1_HUMAN (P08574) Cytochrome c1, heme protein, mitochondrial precursor (Cytochrome c-1) [MASS=35390]                                                                                                                                                                      | 1.00 | 13.54 | 1.19 | 0.15 | 4 | 3 | 1 | DVC[330]TFLR                              | 1 |
|                                                                                                                                                                                                                                                                            |      |       |      |      |   |   | 2 | HGGEDYVFSLLTGYC[339]EPPTGVSLR             | 1 |
|                                                                                                                                                                                                                                                                            |      |       |      |      |   |   | 3 | HGGEDYVFSLLTGYC[339]EPPTGVSLR             | 2 |
|                                                                                                                                                                                                                                                                            |      |       |      |      |   |   | 2 | HLVGVC[339]YTEDEAK                        | 1 |
| CYR61_HUMAN (O00622) Protein CYR61 precursor (Cysteine-rich, angiogenic inducer, 61) (Insulin-like growth factor-binding protein 10) (Protein GIG1) [MASS=42026]                                                                                                           | 0.44 | 5.25  | 0.59 | 0.00 | 1 | 2 | 2 | FTYAGC[330]LSVKK                          | 1 |
|                                                                                                                                                                                                                                                                            |      |       |      |      |   |   | 2 | LPVFGM[147]EPR                            | 1 |
| DCMC_HUMAN (O95822) Malonyl-CoA decarboxylase, mitochondrial precursor (EC 4.1.1.9) (MCD) [MASS=55003]                                                                                                                                                                     | *    | 2.23  | *    | *    | * | 1 | 3 | LVRALQTPLM[147]R                          | 1 |
| DDB1_HUMAN (Q16531) DNA damage-binding protein 1 (Damage-specific DNA-binding protein 1) (UV-damaged DNA-binding factor) (DDB p127 subunit) (DDBa) (UV-damaged DNA-binding protein 1) (UV-DDB 1) (Xeroderma pigmentosum group E-complementing protein) (XPc) [MASS=126967] | 0.00 | 3.60  | 1.24 | 0.00 | 1 | 2 | 3 | TEC[339]NHYNNIM[147]ALYLK                 | 1 |
|                                                                                                                                                                                                                                                                            |      |       |      |      |   |   | 3 | IIRNGIGIHEHASIDLPGIKGLWPLR                | 1 |
| DDX31_HUMAN (Q9H8H2) Probable ATP-dependent RNA helicase DDX31 (EC 3.6.1.-) (DEAD box protein 31) (Helicain) [MASS=94086]                                                                                                                                                  | *    | 1.18  | *    | *    | * | 1 | 3 | QC[330]IKTSSSLFK                          | 1 |
| DEN2C_HUMAN (Q68D51) DENN domain-containing protein 2C [MASS=106865]                                                                                                                                                                                                       | *    | 2.37  | *    | *    | * | 1 | 3 | HFLDLFMETQMFAGFIQDREL                     | 1 |
| DEPD5_HUMAN (O75140) DEP domain-containing protein 5 [MASS=177909]                                                                                                                                                                                                         | 0.00 | 1.46  | 1.44 | 0.00 | 1 | 1 | 3 | AQAGELVWKNEKVM[147]C[339]GYISEDTR         | 1 |
| DGCR8_HUMAN (Q8WYQ5) DGCR8 protein (DiGeorge syndrome critical region 8) [MASS=86045]                                                                                                                                                                                      | *    | 2.07  | *    | *    | * | 1 | 2 | AGLLSPYQILHEC[339]LKR                     | 1 |

|                                                                                                                                                                            |      |       |      |      |    |   |  |   |                                               |   |
|----------------------------------------------------------------------------------------------------------------------------------------------------------------------------|------|-------|------|------|----|---|--|---|-----------------------------------------------|---|
|                                                                                                                                                                            |      |       |      |      |    |   |  | 3 | AKPYEGSILEADC[339]DILIPAASEK                  | 4 |
|                                                                                                                                                                            |      |       |      |      |    |   |  | 2 | AKPYEGSILEADC[339]DILIPAASEK                  | 2 |
| DHE3_HUMAN (P00367) Glutamate dehydrogenase 1, mitochondrial precursor (EC 1.4.1.3) (GDH) [MASS=61397]                                                                     | 1.00 | 11.11 | 1.32 | 0.06 | 12 | 4 |  | 3 | IIKPC[339]NHVLSLSFPIR                         | 1 |
|                                                                                                                                                                            |      |       |      |      |    |   |  | 3 | IIKPC[330]NHVLSLSFPIR                         | 1 |
|                                                                                                                                                                            |      |       |      |      |    |   |  | 2 | AQHSQHRTPC[330]K                              | 1 |
|                                                                                                                                                                            |      |       |      |      |    |   |  | 2 | IIKPC[339]NHVLSLSFPIR                         | 1 |
|                                                                                                                                                                            |      |       |      |      |    |   |  | 2 | IIKPC[330]NHVLSLSFPIR                         | 1 |
|                                                                                                                                                                            |      |       |      |      |    |   |  | 2 | C[339]AVVDVPFGGAK                             | 2 |
| DHPR_HUMAN (P09417) Dihydropteridine reductase (EC 1.5.1.34) (HDHPR) (Quinoid dihydropteridine reductase) [MASS=25803]                                                     | 0.73 | 5.33  | 1.51 | 0.00 | 1  | 1 |  | 2 | GAVHQLC[339]QSLAGK                            | 1 |
| DHSA_HUMAN (P31040) Succinate dehydrogenase [ubiquinone] flavoprotein subunit, mitochondrial precursor (EC 1.3.5.1) (Fp) (Flavoprotein subunit of complex II) [MASS=72691] | 1.00 | 12.65 | 1.53 | 0.08 | 3  | 4 |  | 1 | VGSVLQEGC[339]GK                              | 1 |
|                                                                                                                                                                            |      |       |      |      |    |   |  | 3 | AGLPC[339]QDLEFVQFHPTGIYGAGC[339]LITEGC[339]R | 1 |
|                                                                                                                                                                            |      |       |      |      |    |   |  | 2 | AAFGLSEAGFNTAC[339]VTK                        | 1 |
|                                                                                                                                                                            |      |       |      |      |    |   |  | 3 | LSMQKSMQNHAAVFRVGSVLQEGC[339]GK               | 1 |
| DHSB_HUMAN (P21912) Succinate dehydrogenase [ubiquinone] iron-sulfur protein, mitochondrial precursor (EC 1.3.5.1) (Ip) (Iron-sulfur subunit of complex II) [MASS=31630]   | 1.00 | 7.14  | 1.38 | 0.06 | 5  | 2 |  | 2 | C[330]HTIM[147]NC[330]TR                      | 2 |
|                                                                                                                                                                            |      |       |      |      |    |   |  | 2 | C[330]GPM[147]VLDALIK                         | 1 |
|                                                                                                                                                                            |      |       |      |      |    |   |  | 2 | C[339]GPM[147]VLDALIK                         | 1 |
|                                                                                                                                                                            |      |       |      |      |    |   |  | 2 | C[339]HTIM[147]NC[339]TR                      | 1 |
| DHX8_HUMAN (Q14562) ATP-dependent RNA helicase DHX8 (EC 3.6.1.-) (DEAH box protein 8) (RNA helicase HRH1) [MASS=139314]                                                    | *    | 3.11  | *    | *    | *  | 2 |  | 2 | NLVGETNEETSM[147]RNPDR                        | 1 |
|                                                                                                                                                                            |      |       |      |      |    |   |  | 2 | QIAANM[147]RGIGMMPNDIPEWKK                    | 1 |
| DLDH_HUMAN (P09622) Dihydrolipoyl dehydrogenase, mitochondrial precursor (EC 1.8.1.4) (Dihydrolipoamide dehydrogenase) (Glycine cleavage system L protein) [MASS=54150]    | 1.00 | 10.61 | 1.15 | 0.10 | 4  | 3 |  | 3 | VLGAHILGPGAGEMVNEAALALEYGASC[330]EDIAR        | 1 |
|                                                                                                                                                                            |      |       |      |      |    |   |  | 1 | GIEMSEVR                                      | 1 |
|                                                                                                                                                                            |      |       |      |      |    |   |  | 2 | VC[339]HAHPTLSEAFR                            | 1 |
|                                                                                                                                                                            |      |       |      |      |    |   |  | 3 | VLGAHILGPGAGEM[147]VNEAALALEYGASC[339]EDIAR   | 2 |
| DMPK_HUMAN (Q09013) Myotonin-protein kinase (EC 2.7.11.1) (Myotonic dystrophy protein kinase) (MDPK) (DM-kinase) (DMK) (DMPK) (MT-PK) [MASS=70357]                         | 0.00 | 5.01  | 1.18 | 0.00 | 1  | 2 |  | 3 | C[339]GHIRLADFGSC[330]LK                      | 1 |
|                                                                                                                                                                            |      |       |      |      |    |   |  | 2 | LLC[339]PPETRLGRGGAGDFR                       | 1 |

|                                                                                                                                                                                                  |      |       |      |      |   |   |   |                                        |   |
|--------------------------------------------------------------------------------------------------------------------------------------------------------------------------------------------------|------|-------|------|------|---|---|---|----------------------------------------|---|
| DMXL2_HUMAN (Q8TDJ6) Protein DmX-like 2 (Rabconnectin-3) [MASS=339755]                                                                                                                           | *    | 2.67  | *    | *    | * | 5 | 2 | EKFIPPELSMWDYFVAK                      | 1 |
|                                                                                                                                                                                                  |      |       |      |      |   |   | 3 | PDIGSYERHQIERR                         | 1 |
|                                                                                                                                                                                                  |      |       |      |      |   |   | 3 | RWPLMNDEGEDNSSTVSIVGRPAVAVSC[339]SYTGR | 1 |
|                                                                                                                                                                                                  |      |       |      |      |   |   | 1 | AKVIHK                                 | 1 |
|                                                                                                                                                                                                  |      |       |      |      |   |   | 1 | ESDM[147]IM[147]AFSVNK                 | 1 |
| DNMT1_HUMAN (P26358) DNA (cytosine-5)-methyltransferase 1 (EC 2.1.1.37) (Dnmt1) (DNA methyltransferase Hsal) (DNA MTase Hsal) (MCMT) (M.Hsal) [MASS=183164]                                      | *    | 3.34  | *    | *    | * | 3 | 2 | APSEWAMEEGGM[147]DPESLLEGDDGK          | 1 |
|                                                                                                                                                                                                  |      |       |      |      |   |   | 3 | EIPRVLEQLEDLDSR                        | 1 |
|                                                                                                                                                                                                  |      |       |      |      |   |   | 3 | SDESIKEEDKDQDEK                        | 1 |
| DPOLN_HUMAN (Q7Z5Q5) DNA polymerase nu (EC 2.7.7.7) [MASS=100306]                                                                                                                                | *    | 1.22  | *    | *    | * | 1 | 3 | C[339]KC[330]PVIC[339]FNAK             | 1 |
| DPYL2_HUMAN (Q16555) Dihydropyrimidinase-related protein 2 (DRP-2) (Collapsin response mediator protein 2) (CRMP-2) (N2A3) [MASS=62293]                                                          | 0.93 | 2.80  | 1.15 | 0.00 | 1 | 1 | 2 | AITIANQTNC[339]PLYITK                  | 1 |
| DSG3_HUMAN (P32926) Desmoglein-3 precursor (130 kDa pemphigus vulgaris antigen) (PVA) [MASS=107502]                                                                                              | 0.00 | 1.10  | 1.85 | 0.00 | 1 | 1 | 2 | EETPSFLITC[339]R                       | 1 |
| DYH5_HUMAN (Q8TE73) Ciliary dynein heavy chain 5 (Axonemal beta dynein heavy chain 5) (HL1) [MASS=529002]                                                                                        | *    | 0.63  | *    | *    | * | 2 | 3 | RIANIEHMTYEVYKYAAR                     | 1 |
|                                                                                                                                                                                                  |      |       |      |      |   |   | 3 | RSPQEAELR                              | 1 |
| DYL1_HUMAN (P63167) Dynein light chain 1, cytoplasmic (Dynein light chain LC8-type 1) (8 kDa dynein light chain) (DLC8) (Protein inhibitor of neuronal nitric oxide synthase) (PIN) [MASS=10366] | 1.00 | 12.36 | 0.46 | 0.37 | 2 | 1 | 2 | YNPTWHC[330]IVGR                       | 1 |
|                                                                                                                                                                                                  |      |       |      |      |   |   | 2 | YNPTWHC[339]IVGR                       | 1 |
| DYN1_HUMAN (Q05193) Dynamin-1 (EC 3.6.5.5) [MASS=97407]                                                                                                                                          | *    | 4.63  | *    | *    | * | 2 | 3 | TIGVITKLDLM[147]DEGTDARDVLENK          | 1 |
|                                                                                                                                                                                                  |      |       |      |      |   |   | 2 | DLM[147]PKTIM[147]HLMINNTK             | 1 |
| DYN3_HUMAN (Q9UQ16) Dynamin-3 (EC 3.6.5.5) (Dynamin, testicular) (T-dynamin) [MASS=96681]                                                                                                        | 0.00 | 3.96  | 0.73 | 0.00 | 1 | 1 | 3 | EMIMQFITRENC[330]LILAVTPANTDLANSALKLAK | 1 |
| E2AK4_HUMAN (Q9P2K8) Eukaryotic translation initiation factor 2-alpha kinase 4 (EC 2.7.11.1) (GCN2-like protein) [MASS=186837]                                                                   | 0.00 | 0.73  | 1.63 | 0.00 | 1 | 1 | 2 | AILLHC[339]GIPEDK                      | 1 |

|                                                                                                                                                                                                                                                              |      |       |      |      |   |   |   |                                   |   |
|--------------------------------------------------------------------------------------------------------------------------------------------------------------------------------------------------------------------------------------------------------------|------|-------|------|------|---|---|---|-----------------------------------|---|
| E2F1_HUMAN (Q01094) Transcription factor E2F1 (E2F-1) (Retinoblastoma-binding protein 3) (RBBP-3) (PRB-binding protein E2F-1) (PBR3) (Retinoblastoma-associated protein 1) (RBAP-1) [MASS=46920]                                                             | 0.00 | 11.44 | 0.63 | 0.00 | 1 | 2 | 3 | MALAGAPAGGPC[330]APALEALLGAGALR   | 1 |
|                                                                                                                                                                                                                                                              |      |       |      |      |   |   | 3 | RFLELLSHSADGVVDLNLWAAEVLK         | 1 |
| EAA2_HUMAN (P43004) Excitatory amino acid transporter 2 (Sodium-dependent glutamate/aspartate transporter 2) [MASS=62104]                                                                                                                                    | 1.00 | 5.40  | 0.84 | 0.04 | 7 | 2 | 2 | C[330]LEENLGIDKR                  | 1 |
|                                                                                                                                                                                                                                                              |      |       |      |      |   |   | 2 | NLFPENLVQAC[330]FQQIQTVTK         | 3 |
|                                                                                                                                                                                                                                                              |      |       |      |      |   |   | 2 | NLFPENLVQAC[339]FQQIQTVTK         | 2 |
| EAA4_HUMAN (P48664) Excitatory amino acid transporter 4 (Sodium-dependent glutamate/aspartate transporter) [MASS=61565]                                                                                                                                      | *    | 3.90  | *    | *    | * | 1 | 3 | C[339]LEENLGIDKR                  | 1 |
|                                                                                                                                                                                                                                                              |      |       |      |      |   |   | 3 | NMFPPNLVEAC[330]FKQFKTQYSTR       | 1 |
| ECHA_HUMAN (P40939) Trifunctional enzyme subunit alpha, mitochondrial precursor (TP-alpha) (78 kDa gastrin-binding protein) [Includes: Long-chain enoyl-CoA hydratase (EC 4.2.1.17); Long chain 3-hydroxyacyl-CoA dehydrogenase (EC 1.1.1.211)] [MASS=82999] | 1.00 | 3.80  | 0.94 | 0.18 | 3 | 3 | 1 | ALM[147]GLYHGQVLC[339]K           | 1 |
|                                                                                                                                                                                                                                                              |      |       |      |      |   |   | 2 | C[339]LAPM[147]M[147]SEVIR        | 1 |
|                                                                                                                                                                                                                                                              |      |       |      |      |   |   | 1 | FSAFR                             | 1 |
|                                                                                                                                                                                                                                                              |      |       |      |      |   |   | 2 | ALM[147]GLYHGQVLC[330]K           | 1 |
| ECHB_HUMAN (P55084) Trifunctional enzyme subunit beta, mitochondrial precursor (TP-beta) [Includes: 3-ketoacyl-CoA thiolase (EC 2.3.1.16) (Acetyl-CoA acyltransferase) (Beta-ketothiolase)] [MASS=51395]                                                     | *    | 1.47  | *    | *    | * | 1 | 2 | LKPAFIK                           | 1 |
| ECM1_HUMAN (Q16610) Extracellular matrix protein 1 precursor (Secretory component p85) [MASS=60674]                                                                                                                                                          | 0.00 | 5.19  | 1.32 | 0.00 | 1 | 1 | 3 | AC[339]PSHQPDISSGLELPFPPGVPTLDNIK | 1 |
| ECP_HUMAN (P12724) Eosinophil cationic protein precursor (EC 3.1.27.-) (ECP) (Ribonuclease 3) (RNase 3) [MASS=18440]                                                                                                                                         | 0.00 | 21.88 | 1.43 | 0.00 | 1 | 2 | 3 | AQWFAIQHISLNPPrC[330]TIAM[147]R   | 1 |
|                                                                                                                                                                                                                                                              |      |       |      |      |   |   | 3 | C[330]TIAMRAINNYRWR               | 1 |
| EF1A1_HUMAN (P68104) Elongation factor 1-alpha 1 (EF-1-alpha-1) (Elongation factor 1 A-1) (eEF1A-1) (Elongation factor Tu) (EF-Tu) [MASS=50141]                                                                                                              | 0.98 | 7.14  | 0.97 | 0.00 | 1 | 2 | 1 | RTIEK                             | 1 |
|                                                                                                                                                                                                                                                              |      |       |      |      |   |   | 3 | DGNASGTTLLEALDC[330]ILPPTRPTDKPLR | 1 |

|                                                                                                                                                                                                                                                                   |      |       |      |      |   |   |   |                                               |   |
|-------------------------------------------------------------------------------------------------------------------------------------------------------------------------------------------------------------------------------------------------------------------|------|-------|------|------|---|---|---|-----------------------------------------------|---|
| EF1D_HUMAN (P29692) Elongation factor 1-delta (EF-1-delta) (Antigen NY-CO-4) [MASS=30990]                                                                                                                                                                         | 0.00 | 8.57  | 0.50 | 0.00 | 1 | 1 | 3 | SSILLDVKPWDDETDMAQLEAC[330]VR                 | 1 |
| EF2_HUMAN (P13639) Elongation factor 2 (EF-2) [MASS=95206]                                                                                                                                                                                                        | 0.47 | 4.32  | 0.93 | 0.00 | 1 | 2 | 2 | C[330]LYASVLTAQPR                             | 1 |
|                                                                                                                                                                                                                                                                   |      |       |      |      |   |   | 3 | RWLPAGDALLQMITIHLPSVTAQK                      | 1 |
| EFG2_HUMAN (Q969S9) Elongation factor G 2, mitochondrial precursor (mEF-G 2) (Elongation factor G2) [MASS=86600]                                                                                                                                                  | *    | 6.68  | *    | *    | * | 2 | 3 | IRNIGIMAHIDAGKTTTTER                          | 1 |
|                                                                                                                                                                                                                                                                   |      |       |      |      |   |   | 3 | EDPSLVKVRDPDQSGQTVLC[330]GMGELHIEIIHDR        | 1 |
|                                                                                                                                                                                                                                                                   |      |       |      |      |   |   | 2 | KGDEC[339]ELLGHSK                             | 2 |
| EFTU_HUMAN (P49411) Elongation factor Tu, mitochondrial precursor (EF-Tu) (P43) [MASS=49541]                                                                                                                                                                      | 1.00 | 11.95 | 1.23 | 0.09 | 6 | 3 | 2 | HYAHTDC[339]PGHADYVK                          | 1 |
|                                                                                                                                                                                                                                                                   |      |       |      |      |   |   | 3 | HYAHTDC[339]PGHADYVK                          | 1 |
|                                                                                                                                                                                                                                                                   |      |       |      |      |   |   | 2 | HYAHTDC[330]PGHADYVK                          | 1 |
|                                                                                                                                                                                                                                                                   |      |       |      |      |   |   | 3 | ELLTEFGYKGEETPVIVGSALC[339]ALEGR              | 1 |
| EGLN2_HUMAN (Q96KS0) Egl nine homolog 2 (EC 1.14.11.-) (Hypoxia-inducible factor prolyl hydroxylase 1) (HIF-prolyl hydroxylase 1) (HIF-PH1) (HPH-3) (Prolyl hydroxylase domain-containing protein 1) (PHD1) (Estrogen-induced tag 6) [MASS=43650]                 | 0.00 | 11.06 | 2.44 | 0.00 | 1 | 2 | 2 | GDQIAWVEGHEPGC[339]R                          | 1 |
|                                                                                                                                                                                                                                                                   |      |       |      |      |   |   | 3 | EGGM[147]SC[339]SC[330]SSGSGEASAGLMEEALPSAPER | 1 |
|                                                                                                                                                                                                                                                                   |      |       |      |      |   |   |   |                                               |   |
| EHMT2_HUMAN (Q96KQ7) Histone-lysine N-methyltransferase, H3 lysine-9 specific 3 (EC 2.1.1.43) (Histone H3-K9 methyltransferase 3) (H3-K9-HMTase 3) (Euchromatic histone-lysine N-methyltransferase 2) (HLA-B-associated transcript 8) (Protein G9a) [MASS=132383] | *    | 0.91  | *    | *    | * | 1 | 1 | LRLGVGNRAIR                                   | 1 |
| EMIL1_HUMAN (Q9Y6C2) EMILIN-1 precursor (Elastin microfibril interface-located protein 1) (Elastin microfibril interfacier 1) [MASS=106694]                                                                                                                       | *    | 5.91  | *    | *    | * | 2 | 3 | LGQLEGLLQAHGDEGC[330]GAC[339]GGVQEELGRLR      | 1 |
|                                                                                                                                                                                                                                                                   |      |       |      |      |   |   | 3 | GTELGGAAGQGGHPPGYTSLASRLSRLEDR                | 1 |
| ENOA_HUMAN (P06733) Alpha-enolase (EC 4.2.1.11) (2-phospho-D-glycerate hydro-lyase) (Non-neural enolase) (NNE) (Enolase 1) (Phosphopyruvate hydratase) (C-myc promoter-binding protein) (MBP-1) (MPB-1) (Plasminogen-binding protein) [MASS=47037]                | 1.00 | 3.46  | 0.91 | 0.09 | 3 | 1 | 1 | FGANAILGVSLAVC[330]JK                         | 2 |
|                                                                                                                                                                                                                                                                   |      |       |      |      |   |   | 1 | FGANAILGVSLAVC[339]JK                         | 1 |

|                                                                                                                                                                                                                                                 |      |      |      |      |   |   |   |                                          |        |
|-------------------------------------------------------------------------------------------------------------------------------------------------------------------------------------------------------------------------------------------------|------|------|------|------|---|---|---|------------------------------------------|--------|
| ENOG_HUMAN (P09104) Gamma-enolase (EC 4.2.1.11) (2-phospho-D-glycerate hydrolyase) (Neural enolase) (Neuron-specific enolase) (NSE) (Enolase 2) [MASS=47137]                                                                                    | 1.00 | 3.23 | *    | *    | * | 1 | 3 | IVIGM[147]DVAASEFYR                      | 1      |
| EP400_HUMAN (Q96L91) E1A-binding protein p400 (EC 3.6.1.-) (p400 kDa SWI2/SNF2-related protein) (Domino homolog) (hDomino) (CAG repeat protein 32) (Trinucleotide repeat-containing gene 12 protein) [MASS=343645]                              | *    | 1.11 | *    | *    | * | 3 | 2 | DFWKEADLSM[147]FDLIGLENK                 | 1      |
|                                                                                                                                                                                                                                                 |      |      |      |      |   |   | 2 | LQM[147]RVPAVR                           | 1      |
|                                                                                                                                                                                                                                                 |      |      |      |      |   |   | 1 | PAAAKLK                                  | 1      |
| EPC1_HUMAN (Q9H2F5) Enhancer of polycomb homolog 1 [MASS=93463]                                                                                                                                                                                 | 0.00 | 3.23 | 2.60 | 0.00 | 1 | 2 | 2 | QPM[147]KPTYAIIPIITNSSQFK<br>C[339]IGFAR | 1<br>1 |
| ERAL_HUMAN (O75616) GTP-binding protein era homolog (hERA) (ERA-W) (Conserved ERA-like GTPase) (CEGA) [MASS=48350]                                                                                                                              | *    | 3.20 | *    | *    | * | 1 | 3 | VLRVVLLGAPNAGK                           | 2      |
| ES1_HUMAN (P30042) ES1 protein homolog, mitochondrial precursor (Protein KNP-I) (Protein GT335) [MASS=28142]                                                                                                                                    | 0.96 | 7.84 | 1.04 | 0.00 | 1 | 1 | 3 | EFHQAGKPIGLC[330]C[330]IAPVLAAK          | 1      |
| ETFD_HUMAN (Q16134) Electron transfer flavoprotein-ubiquinone oxidoreductase, mitochondrial precursor (EC 1.5.5.1) (ETF-QO) (ETF-ubiquinone oxidoreductase) (ETF dehydrogenase) (Electron-transferring-flavoprotein dehydrogenase) [MASS=68507] | 1.00 | 1.94 | 1.64 | 0.01 | 2 | 1 | 2 | LQINAQNC[330]VHC[330]K                   | 1      |
|                                                                                                                                                                                                                                                 |      |      |      |      |   |   | 2 | LQINAQNC[339]VHC[339]K                   | 1      |
| EVX1_HUMAN (P49640) Homeobox even-skipped homolog protein 1 (EVX-1) [MASS=42439]                                                                                                                                                                | 0.00 | 5.65 | 1.77 | 0.00 | 1 | 1 | 3 | SNGGSGGGGSQGTLC[339]SASDQM[147]R         | 1      |
| EXOS1_HUMAN (Q9Y3B2) 3'-5' exoribonuclease CSL4 homolog (EC 3.1.13.-) (Exosome component 1) [MASS=21452]                                                                                                                                        | 0.00 | 8.21 | 1.98 | 0.00 | 1 | 1 | 2 | LC[339]NLEEGSPGSGTYTR                    | 1      |
| FA29A_HUMAN (Q7Z4H7) Protein FAM29A [MASS=108621]                                                                                                                                                                                               | 0.00 | 4.71 | 2.81 | 0.00 | 1 | 3 | 2 | NTESSAFGGSLPAK                           | 1      |
|                                                                                                                                                                                                                                                 |      |      |      |      |   |   | 2 | M[147]GTPKEK                             | 1      |
|                                                                                                                                                                                                                                                 |      |      |      |      |   |   | 2 | ISGEC[339]GSSFPQVVGSLFLSPGGPK            | 1      |

|                                                                                                                                                                                                                      |      |       |      |      |   |   |                                                                                                                                       |                      |
|----------------------------------------------------------------------------------------------------------------------------------------------------------------------------------------------------------------------|------|-------|------|------|---|---|---------------------------------------------------------------------------------------------------------------------------------------|----------------------|
| FANCM_HUMAN (Q8IYD8) Fanconi anemia group M protein (EC 3.6.1.-) (ATP-dependent RNA helicase FANCM) (Protein FACM) (Fanconi anemia-associated polypeptide of 250 kDa) (FAAP250) (Protein Hef ortholog) [MASS=232190] | 0.00 | 3.56  | 1.64 | 0.00 | 1 | 4 | 1 VSKEIK<br>3 NELGRNEDFMKLYNHLEK[339]M[147]FAR<br>3 TYIQILESFARSLIQRNVLMR<br>3 SC[339]HSVEDGQLLTSNESEDDEIFRR                          | 1<br>1<br>1<br>1     |
| FARP1_HUMAN (Q9Y4F1) FERM, RhoGEF and pleckstrin domain-containing protein 1 (Chondrocyte-derived ezrin-like protein) [MASS=118632]                                                                                  | 0.00 | 3.06  | 1.66 | 0.00 | 1 | 2 | 3 SEMEKWVEDIQM[147]AIDLAEK<br>2 LMHYKQVLERLC[330]K                                                                                    | 1<br>1               |
| FBN1_HUMAN (P35555) Fibrillin-1 precursor [MASS=312312]                                                                                                                                                              | 0.00 | 2.19  | *    | *    | * | 4 | 3 C[330]EC[330]PVGFFYNDK<br>2 NM[147]C[330]LNGM[147]C[330]INEDGSFK<br>3 QIC[330]PYGSGIIVGPDDSAVDM[147]DEC[339]K<br>2 LC[330]SVPMVIPGR | 1<br>1<br>1<br>1     |
| FBN2_HUMAN (P35556) Fibrillin-2 precursor [MASS=314347]                                                                                                                                                              | 0.33 | 0.31  | 1.08 | 0.01 | 2 | 1 | 1 C[339]IPTVSSYR<br><br>3 YNSHQM[147]GQSKQFPLEESSC[330]JEK<br>3 IPIGAKIQTLHLVGVNVEIPC[330]IPMLRHLYMK<br>1 ELSVSGK                     | 1<br><br>1<br>1<br>2 |
| FBX38_HUMAN (Q6PIJ6) F-box only protein 38 (Modulator of KLF7 activity homolog) (MoKA) [MASS=133953]                                                                                                                 | 0.00 | 10.19 | 0.24 | 0.00 | 1 | 6 | 3 VVDLC[339]AGRWWWEYMPSGFTDASFLTLLKK<br>3 KLNMDQVLDQILR<br>2 NRIIYLRPM[147]QQVDTLTLEQK                                                | 1<br>1<br>1          |
| FGFR1_HUMAN (P11362) Basic fibroblast growth factor receptor 1 precursor (EC 2.7.10.1) (FGFR-1) (bFGF-R) (Fms-like tyrosine kinase 2) (c-fgr) (CD331 antigen) [MASS=91867]                                           | 0.00 | 3.53  | *    | *    | * | 2 | 2 DC[339]WHAVPSQRPTFK<br>2 M[147]PVAPYWTSPEKMEK                                                                                       | 1<br>1               |
| FGFR2_HUMAN (P21802) Fibroblast growth factor receptor 2 precursor (EC 2.7.10.1) (FGFR-2) (Keratinocyte growth factor receptor 2) (CD332 antigen) [MASS=92024]                                                       | 0.00 | 2.80  | 1.14 | 0.00 | 1 | 1 | 3 DDATEKDLSDLVSEM[147]EM[147]M[147]KMIGK                                                                                              | 1                    |
| FGRL1_HUMAN (Q8N441) Fibroblast growth factor receptor-like 1 precursor (FGF receptor-like protein 1) (Fibroblast growth factor receptor 5) (FGFR-like protein) (FGF homologous factor receptor) [MASS=54536]        | 0.00 | 3.97  | 2.09 | 0.00 | 1 | 1 | 2 LQC[339]PVEGDPPPLTM[147]WTKDGR                                                                                                      | 1                    |

|                                                                                                                                                                                             |      |      |      |      |   |   |             |                                                                             |             |
|---------------------------------------------------------------------------------------------------------------------------------------------------------------------------------------------|------|------|------|------|---|---|-------------|-----------------------------------------------------------------------------|-------------|
| FNBP2_HUMAN (O75044) SLIT-ROBO Rho GTPase-activating protein 2 (srGAP2) (Formin-binding protein 2) [MASS=120880]                                                                            | 0.00 | 1.68 | 1.31 | 0.00 | 1 | 1 | 2           | DIFHDLM[147]AC[339]VTM[147]DNLQER                                           | 1           |
| FOG2_HUMAN (Q8WW38) Zinc finger protein ZFPM2 (Zinc finger protein multitype 2) (Friend of GATA protein 2) (FOG-2) (hFOG-2) [MASS=128142]                                                   | *    | 3.39 | *    | *    | * | 3 | 1<br>3<br>2 | ISFNK<br>NSPDVSYERSIIKC[330]EK<br>NDLGQLDGKVFNPESER                         | 1<br>1<br>1 |
| FOSL1_HUMAN (P15407) Fos-related antigen 1 (FRA-1) [MASS=29413]                                                                                                                             | 0.00 | 5.17 | 1.30 | 0.00 | 1 | 1 | 2           | RPC[339]EQISPEEEERR                                                         | 1           |
| FRS3_HUMAN (O43559) Fibroblast growth factor receptor substrate 3 (FGFR substrate 3) (Suc1-associated neurotrophic factor target 2) (SNT-2) (FGFR signaling adaptor SNT2) [MASS=54330]      | *    | 2.85 | *    | *    | * | 1 | 3           | KTVAMSNLQRALPR                                                              | 1           |
| FXL13_HUMAN (Q8NEE6) F-box/LRR-repeat protein 13 (F-box and leucine-rich repeat protein 13) [MASS=83941]                                                                                    | 0.00 | 6.26 | 4.35 | 0.00 | 1 | 2 | 3<br>3      | C[339]HYLHILDISGC[339]VLLTDQILEDLQIGC[339]K<br>FIDKNYPNLSHIYM[147]ADC[330]K | 1<br>1      |
| FXL19_HUMAN (Q6PCT2) F-box/LRR-repeat protein 19 (F-box and leucine-rich repeat protein 19) [MASS=73770]                                                                                    | *    | 2.08 | *    | *    | * | 1 | 3           | TEC[330]GDC[339]HFC[339]RDM[147]KK                                          | 1           |
| FXL20_HUMAN (Q96IG2) F-box/LRR-repeat protein 20 (F-box and leucine-rich repeat protein 20) (F-box/LRR-repeat protein 2-like) [MASS=48423]                                                  | 0.00 | 3.67 | 1.41 | 0.00 | 1 | 1 | 2           | HLDLASC[339]TSITNM[147]SLK                                                  | 1           |
| G3PT_HUMAN (O14556) Glyceraldehyde-3-phosphate dehydrogenase, testis-specific (EC 1.2.1.12) (Spermatogenic cell-specific glyceraldehyde 3-phosphate dehydrogenase 2) (GAPDH-2) [MASS=44501] | 0.00 | 4.17 | 0.79 | 0.00 | 1 | 1 | 2           | NGQLVVDNHEISVYQC[330]K                                                      | 1           |
| G3P_HUMAN (P04406) Glyceraldehyde-3-phosphate dehydrogenase (EC 1.2.1.12) (GAPDH) [MASS=35922]                                                                                              | 1.00 | 4.19 | 0.86 | 0.04 | 2 | 1 | 2<br>2      | VPTANVSVVDLTC[330]R<br>VPTANVSVVDLTC[339]R                                  | 1<br>1      |



|                                                                                                                                                                                                                                                                             |      |       |      |      |   |   |   |                                             |   |
|-----------------------------------------------------------------------------------------------------------------------------------------------------------------------------------------------------------------------------------------------------------------------------|------|-------|------|------|---|---|---|---------------------------------------------|---|
| GABT_HUMAN (P80404) 4-aminobutyrate aminotransferase, mitochondrial precursor (EC 2.6.1.19) ((S)-3-amino-2-methylpropionate transaminase) (EC 2.6.1.22) (Gamma-amino-N-butyrate transaminase) (GABA transaminase) (GABA aminotransferase) (GABA-AT) (GABA-T) ( [MASS=56439] | 1.00 | 5.00  | 1.15 | 0.06 | 2 | 2 | 2 | TM[147]GC[330]LATTHSK                       | 1 |
|                                                                                                                                                                                                                                                                             |      |       |      |      |   |   | 1 | TM[147]GC[339]LATTHSK                       | 1 |
|                                                                                                                                                                                                                                                                             |      |       |      |      |   |   | 2 | GTFC[339]SFDPDDISIR                         | 1 |
| GANC_HUMAN (Q8TET4) Neutral alpha-glucosidase C (EC 3.2.1.20) [MASS=104347]                                                                                                                                                                                                 | 0.00 | 5.14  | 0.82 | 0.00 | 1 | 3 | 3 | M[147]EAAVKKEEISVEDEAVDKNIFR                | 1 |
|                                                                                                                                                                                                                                                                             |      |       |      |      |   |   | 2 | STGWM[147]TESSYGLR                          | 1 |
|                                                                                                                                                                                                                                                                             |      |       |      |      |   |   | 2 | TFAHWEGGC[330]TVK                           | 1 |
| GAS6_HUMAN (Q14393) Growth-arrest-specific protein 6 precursor (GAS-6) [MASS=79676]                                                                                                                                                                                         | *    | 1.80  | *    | *    | * | 1 | 3 | VNTRMQC[330]FSVTER                          | 1 |
| GASP1_HUMAN (Q5JY77) G-protein coupled receptor-associated sorting protein 1 (GASP-1) [MASS=156850]                                                                                                                                                                         | *    | 0.86  | *    | *    | * | 1 | 3 | EEVSMKHGTGVR                                | 1 |
|                                                                                                                                                                                                                                                                             |      |       |      |      |   |   | 2 | KAC[330]ADATLSQITNNIDPVGR                   | 2 |
| GBB1_HUMAN (P62873) Guanine nucleotide-binding protein G(I)/G(S)/G(T) subunit beta 1 (Transducin beta chain 1) [MASS=37246]                                                                                                                                                 | 1.00 | 13.27 | 1.00 | 0.14 | 6 | 3 | 2 | LFVSGAC[339]DASAK                           | 1 |
|                                                                                                                                                                                                                                                                             |      |       |      |      |   |   | 2 | KAC[339]ADATLSQITNNIDPVGR                   | 1 |
|                                                                                                                                                                                                                                                                             |      |       |      |      |   |   | 2 | ELAGHTGYLSC[339]C[339]R                     | 1 |
|                                                                                                                                                                                                                                                                             |      |       |      |      |   |   | 2 | ELAGHTGYLSC[330]C[330]R                     | 1 |
| GBB2_HUMAN (P62879) Guanine nucleotide-binding protein G(I)/G(S)/G(T) subunit beta 2 (Transducin beta chain 2) (G protein beta 2 subunit) [MASS=37200]                                                                                                                      | 0.99 | 3.83  | 0.78 | 0.00 | 1 | 1 | 2 | ELPGHTGYLSC[330]C[330]R                     | 1 |
| GBG2_HUMAN (P59768) Guanine nucleotide-binding protein G(I)/G(S)/G(O) gamma-2 subunit precursor (G gamma-I) [MASS=7719]                                                                                                                                                     | 0.97 | 42.86 | 1.09 | 0.00 | 1 | 1 | 3 | AAADLM[147]AYC[330]EAHAKEDPLLTPVPAENPFR     | 1 |
| GBRR1_HUMAN (P24046) Gamma-aminobutyric-acid receptor rho-1 subunit precursor (GABA(A) receptor) [MASS=55257]                                                                                                                                                               | *    | 2.33  | *    | *    | * | 1 | 2 | KSQRSSYVSM[147]R                            | 1 |
| GCP2_HUMAN (Q9BSJ2) Gamma-tubulin complex component 2 (GCP-2) (Spindle pole body protein Spc97 homolog) (hSpc97) (hGCP2) (h103p) [MASS=102533]                                                                                                                              | *    | 3.77  | *    | *    | * | 2 | 2 | YVSAQPLAGR                                  | 1 |
|                                                                                                                                                                                                                                                                             |      |       |      |      |   |   | 3 | VFSKLSVC[330]VM[147]FTNC[330]M[147]QKFTQSMK | 1 |

|                                                                                                                                                                                                                                                                              |      |      |       |      |    |   |   |                                         |   |
|------------------------------------------------------------------------------------------------------------------------------------------------------------------------------------------------------------------------------------------------------------------------------|------|------|-------|------|----|---|---|-----------------------------------------|---|
| GEMI5_HUMAN (Q8TEQ6) Gem-associated protein 5 (Gemin5) [MASS=168560]                                                                                                                                                                                                         | *    | 1.92 | *     | *    | *  | 2 | 3 | EPVIC[330]TPVSSGFEKSK                   | 1 |
|                                                                                                                                                                                                                                                                              |      |      |       |      |    |   | 3 | SQLC[339]KSTANGPDK                      | 1 |
| GFRA2_HUMAN (O00451) GDNF family receptor alpha-2 precursor (GFR-alpha-2) (Neurturin receptor alpha) (NTNR-alpha) (NRTNR-alpha) (TGF-beta-related neurotrophic factor receptor 2) (GDNF receptor beta) (GDNFR-beta) (RET ligand 2) [MASS=51558]                              | 0.00 | 7.33 | 0.57  | 0.00 | 1  | 1 | 3 | VEKTPSLPDDLSDSTSLGTSVITTC[330]TSVQEQGLK | 1 |
| GHC1_HUMAN (Q9H936) Mitochondrial glutamate carrier 1 (GC-1) (Glutamate/H(+)-symporter 1) (Solute carrier family 25 member 22) [MASS=34470]                                                                                                                                  | 1.00 | 6.81 | 1.34  | 0.00 | 4  | 1 | 2 | LINGGIAGLIGVTC[339]VFPIDLAK             | 3 |
|                                                                                                                                                                                                                                                                              |      |      |       |      |    |   | 2 | LINGGIAGLIGVTC[330]VFPIDLAK             | 1 |
|                                                                                                                                                                                                                                                                              |      |      |       |      |    |   | 2 | LKEC[339]MDM[147]LR                     | 1 |
|                                                                                                                                                                                                                                                                              |      |      |       |      |    |   | 2 | C[339]VQSNIVLLTQAFR                     | 3 |
| GLSK_HUMAN (O94925) Glutaminase kidney isoform, mitochondrial precursor (EC 3.5.1.2) (GLS) (L-glutamine amidohydrolase) (K-glutaminase) [MASS=73461]                                                                                                                         | 1.00 | 5.38 | 1.55  | 0.05 | 11 | 3 | 2 | LKEC[330]M[147]DM[147]LR                | 1 |
|                                                                                                                                                                                                                                                                              |      |      |       |      |    |   | 2 | LKEC[339]M[147]DM[147]LR                | 1 |
|                                                                                                                                                                                                                                                                              |      |      |       |      |    |   | 2 | LKEC[339]M[147]DMLR                     | 1 |
|                                                                                                                                                                                                                                                                              |      |      |       |      |    |   | 2 | C[330]VQSNIVLLTQAFR                     | 2 |
|                                                                                                                                                                                                                                                                              |      |      |       |      |    |   | 2 | VPFC[330]LQSC[330]VKPLK                 | 2 |
|                                                                                                                                                                                                                                                                              |      |      |       |      |    |   | 2 | VPFC[339]LQSC[339]VKPLK                 | 2 |
| GLSL_HUMAN (Q9UI32) Glutaminase liver isoform, mitochondrial precursor (EC 3.5.1.2) (GLS) (L-glutamine amidohydrolase) (L-glutaminase) [MASS=66309]                                                                                                                          | *    | 1.16 | *     | *    | *  | 1 | 1 | FLIEAC[339]K                            | 1 |
| GLT10_HUMAN (Q86SR1) Polypeptide N-acetylgalactosaminyltransferase 10 (EC 2.4.1.41) (Protein-UDP acetylgalactosaminyltransferase 10) (UDP-GalNAc:polypeptide N-acetylgalactosaminyltransferase 10) (Polypeptide GalNAc transferase 10) (GalNAc-T10) (pp-GaNTas) [MASS=68991] | 0.00 | 1.16 | 13.45 | 0.00 | 1  | 1 | 2 | VWM[147]C[339]GGR                       | 1 |

|                                                                                                                                                                                                               |      |      |      |      |   |   |   |                                    |   |
|---------------------------------------------------------------------------------------------------------------------------------------------------------------------------------------------------------------|------|------|------|------|---|---|---|------------------------------------|---|
| GLUD1_HUMAN (Q5TDP6) Glutamate--<br>ammonia ligase domain-containing protein 1<br>(Lengsin) (Lens glutamine synthase-like)<br>[MASS=57278]                                                                    | *    | 2.75 | *    | *    | * | 2 | 1 | YIAKR                              | 1 |
|                                                                                                                                                                                                               |      |      |      |      |   |   | 2 | VSHGVC[330]MPR                     | 1 |
| GNAO2_HUMAN (P29777) Guanine nucleotide-<br>binding protein G(o) subunit alpha 2<br>[MASS=39955]                                                                                                              | *    | 1.70 | *    | *    | * | 1 | 1 | NKSAHK                             | 1 |
| GOR_HUMAN (Q8IX06) Exonuclease GOR<br>(EC 3.1.-.-) (Antigen GOR) (RNA exonuclease<br>1 homolog-like) [MASS=35139]                                                                                             | 0.00 | 3.77 | 0.61 | 0.00 | 1 | 1 | 3 | HRSVSPAALAC[330]P                  | 1 |
| GP179_HUMAN (Q6PRD1) Probable G-protein<br>coupled receptor 179 precursor (Probable G-<br>protein coupled receptor 158-like 1)<br>[MASS=257362]                                                               | *    | 1.14 | *    | *    | * | 2 | 2 | SPRLGRP                            | 1 |
|                                                                                                                                                                                                               |      |      |      |      |   |   | 2 | ASRTESRESVEGPPALGFR                | 1 |
| GPDM_HUMAN (P43304) Glycerol-3-<br>phosphate dehydrogenase, mitochondrial<br>precursor (EC 1.1.99.5) (GPD-M) (GPDH-M)<br>(mtGPD) [MASS=80833]                                                                 | *    | 1.51 | *    | *    | * | 1 | 2 | NYLSC[330]DVEVRR                   | 1 |
| GPM6A_HUMAN (P51674) Neuronal<br>membrane glycoprotein M6-a (M6a)<br>[MASS=31209]                                                                                                                             | 1.00 | 7.55 | 0.75 | 0.01 | 2 | 2 | 2 | KIC[330]TVSENFLR                   | 1 |
|                                                                                                                                                                                                               |      |      |      |      |   |   | 2 | IC[330]TVSENFLR                    | 1 |
| GPM6B_HUMAN (Q13491) Neuronal<br>membrane glycoprotein M6-b (M6b)<br>[MASS=28989]                                                                                                                             | *    | 2.64 | *    | *    | * | 1 | 1 | ELHGEFK                            | 1 |
| GPVI_HUMAN (Q9HCN6) Platelet glycoprotein<br>VI precursor [MASS=36923]                                                                                                                                        | 0.00 | 4.13 | 1.59 | 0.00 | 1 | 1 | 3 | C[339]QGPPGVLDYRLEK                | 1 |
| GRHPR_HUMAN (Q9UBQ7) Glyoxylate<br>reductase/hydroxypyruvate reductase (EC<br>1.1.1.79) [MASS=35668]                                                                                                          | *    | 7.62 | *    | *    | * | 1 | 3 | VGYPDVLTDTTAELAVSLLLTTC[339]R      | 1 |
|                                                                                                                                                                                                               |      |      |      |      |   |   | 1 | DPGPGSK                            | 2 |
| GRIN1_HUMAN (Q7Z2K8) G protein-regulated<br>inducer of neurite outgrowth 1 (GRIN1)<br>[MASS=102371]                                                                                                           | *    | 6.25 | *    | *    | * | 4 | 2 | TAPPDGAARKRPPGLFR                  | 1 |
|                                                                                                                                                                                                               |      |      |      |      |   |   | 3 | RDAGLQVSLGAAETR                    | 1 |
|                                                                                                                                                                                                               |      |      |      |      |   |   | 3 | NVDPMSGKVDPVSLGKM[147]DPMC[330]SGK | 1 |
| GSLG1_HUMAN (Q92896) Golgi apparatus<br>protein 1 precursor (Golgi sialoglycoprotein MG-<br>160) (E-selectin ligand 1) (ESL-1) (Cysteine-<br>rich fibroblast growth factor receptor) (CFR-1)<br>[MASS=134592] | *    | 1.70 | *    | *    | * | 1 | 3 | VAELSSDDFHLDRLHYFAC[330]R          | 1 |

|                                                                                                                                                                                          |      |       |      |      |   |   |   |                                        |   |
|------------------------------------------------------------------------------------------------------------------------------------------------------------------------------------------|------|-------|------|------|---|---|---|----------------------------------------|---|
| GTR9_HUMAN (Q9NRM0) Solute carrier family 2, facilitated glucose transporter member 9 (Glucose transporter type 9) [MASS=58817]                                                          | 0.00 | 6.11  | 1.04 | 0.00 | 1 | 1 | 3 | HTLLANNGFAISAALLMAC[339]SLQAGAFEMLIVGR | 1 |
| GUC1B_HUMAN (Q9UMX6) Guanylyl cyclase-activating protein 2 (GCAP 2) (Guanylate cyclase activator 1B) [MASS=23346]                                                                        | *    | 3.02  | *    | *    | * | 1 | 1 | GTLEHK                                 | 1 |
| H33_HUMAN (P84243) Histone H3.3 [MASS=15197]                                                                                                                                             | 0.92 | 23.70 | 2.33 | 0.00 | 1 | 1 | 3 | FQSAAIGALQEASEAYLVGLFEDTNLC[339]AIHAK  | 1 |
| HBB_HUMAN (P68871) Hemoglobin subunit beta (Hemoglobin beta chain) (Beta-globin) [MASS=15867]                                                                                            | 1.00 | 15.07 | 1.02 | 0.17 | 4 | 1 | 3 | GTFATLSELHC[339]DKLHVDPENFR            | 2 |
|                                                                                                                                                                                          |      |       |      |      |   |   | 3 | GTFATLSELHC[330]DKLHVDPENFR            | 1 |
|                                                                                                                                                                                          |      |       |      |      |   |   | 2 | GTFATLSELHC[339]DKLHVDPENFR            | 1 |
| HDAC4_HUMAN (P56524) Histone deacetylase 4 (HD4) [MASS=119069]                                                                                                                           | 0.77 | 3.32  | 0.47 | 0.00 | 1 | 2 | 1 | VLQQRPNANAVR                           | 1 |
|                                                                                                                                                                                          |      |       |      |      |   |   | 3 | LPC[330]GGVGVDSDTIWNEVHSAGAAR          | 1 |
| HNRL1_HUMAN (Q9BUJ2) Heterogeneous nuclear ribonucleoprotein U-like protein 1 (Adenovirus early region 1B-associated protein 5) (E1B-55 kDa-associated protein 5) (E1B-AP5) [MASS=95738] | *    | 1.75  | *    | *    | * | 1 | 2 | KAIVIC[330]PTDEDLKDR                   | 1 |
| HS90B_HUMAN (P08238) Heat shock protein HSP 90-beta (HSP 84) (HSP 90) [MASS=83132]                                                                                                       | *    | 1.66  | *    | *    | * | 1 | 3 | EFDGKSLVSVTK                           | 1 |
| HV1C_HUMAN (P01744) Ig heavy chain V-I region ND precursor (Fragments) [MASS=16503]                                                                                                      | 0.00 | 7.48  | 1.11 | 0.00 | 1 | 1 | 2 | SDDSAVFYC[339]AK                       | 1 |
| HXC11_HUMAN (O43248) Homeobox protein Hox-C11 [MASS=33748]                                                                                                                               | 0.00 | 4.93  | 1.52 | 0.00 | 1 | 1 | 2 | M[147]FNSVNLGNFC[339]SPSR              | 1 |

|                                                                                                                                                                                                                          |      |       |      |      |    |    |  |   |                                   |   |
|--------------------------------------------------------------------------------------------------------------------------------------------------------------------------------------------------------------------------|------|-------|------|------|----|----|--|---|-----------------------------------|---|
|                                                                                                                                                                                                                          |      |       |      |      |    |    |  | 2 | AAQLC[339]GAGM[147]AAVVDKIR       | 1 |
|                                                                                                                                                                                                                          |      |       |      |      |    |    |  | 2 | TVC[339]GVVSR                     | 1 |
|                                                                                                                                                                                                                          |      |       |      |      |    |    |  | 3 | LGVEPSDDDC[330]VSVQHVC[330]TIVSFR | 1 |
|                                                                                                                                                                                                                          |      |       |      |      |    |    |  | 2 | C[339]NVSFLLSEDGSGK               | 2 |
|                                                                                                                                                                                                                          |      |       |      |      |    |    |  | 2 | LPVGFTFSFPC[330]QQSK              | 2 |
|                                                                                                                                                                                                                          |      |       |      |      |    |    |  | 3 | MIAAQLLAYFTELKDDQVK               | 1 |
|                                                                                                                                                                                                                          |      |       |      |      |    |    |  | 3 | LGVEPSDDDC[339]VSVQHVC[339]TIVSFR | 1 |
|                                                                                                                                                                                                                          |      |       |      |      |    |    |  | 2 | ATDC[339]VGHDVVTLLR               | 5 |
| HXK1_HUMAN (P19367) Hexokinase-1 (EC 2.7.1.1) (Hexokinase type I) (HK I) (Brain form hexokinase) [MASS=102484]                                                                                                           | 1.00 | 17.67 | 1.52 | 0.04 | 22 | 10 |  |   |                                   |   |
|                                                                                                                                                                                                                          |      |       |      |      |    |    |  | 2 | AILQQLGLNSTC[339]DDSILVK          | 2 |
|                                                                                                                                                                                                                          |      |       |      |      |    |    |  | 2 | RAAQLC[339]GAGM[147]AAVVDK        | 1 |
|                                                                                                                                                                                                                          |      |       |      |      |    |    |  | 2 | KLPVGFTFSFPC[339]QQSK             | 1 |
|                                                                                                                                                                                                                          |      |       |      |      |    |    |  | 2 | KLPVGFTFSFPC[330]QQSK             | 2 |
|                                                                                                                                                                                                                          |      |       |      |      |    |    |  | 2 | ATDC[330]VGHDVVTLLR               | 1 |
|                                                                                                                                                                                                                          |      |       |      |      |    |    |  | 1 | TVC[330]GVVSR                     | 1 |
|                                                                                                                                                                                                                          |      |       |      |      |    |    |  | 2 | LPVGFTFSFPC[339]QQSK              | 1 |
|                                                                                                                                                                                                                          |      |       |      |      |    |    |  | 2 | TVC[330]GVVSR                     | 1 |
| I17RB_HUMAN (Q9NRM6) Interleukin-17 receptor B precursor (IL-17 receptor B) (IL-17RB) (Interleukin-17B receptor) (IL-17B receptor) (IL-17 receptor homolog 1) (IL-17Rh1) (IL17Rh1) (Cytokine receptor CRL4) [MASS=55884] | *    | 3.39  | *    | *    | *  | 1  |  | 2 | NEETVEVNFTTTPLGNR                 | 1 |
| I2C1_HUMAN (Q9UL18) Eukaryotic translation initiation factor 2C 1 (eIF2C 1) (eIF-2C 1) (Argonaute-1) (Putative RNA-binding protein Q99) [MASS=97214]                                                                     | 0.63 | 5.83  | 1.35 | 0.00 | 1  | 3  |  | 2 | VGDTLLGMATQC[339]VQVK             | 1 |
|                                                                                                                                                                                                                          |      |       |      |      |    |    |  | 2 | DAGMPIQQQPC[330]FC[330]K          | 1 |
|                                                                                                                                                                                                                          |      |       |      |      |    |    |  | 3 | VGDTLLGM[147]ATQC[330]VQVKNVVK    | 1 |
| I2C3_HUMAN (Q9H9G7) Eukaryotic translation initiation factor 2C 3 (eIF2C 3) (eIF-2C 3) (Argonaute-3) [MASS=97360]                                                                                                        | 0.63 | 2.21  | *    | *    | *  | 1  |  | 2 | M[147]EIGSAGPAGAQLLM[147]VPR      | 1 |
| IDH3A_HUMAN (P50213) Isocitrate dehydrogenase [NAD] subunit alpha, mitochondrial precursor (EC 1.1.1.41) (Isocitric dehydrogenase) (NAD(+)-specific ICDH) [MASS=39591]                                                   | 1.00 | 7.38  | 1.42 | 0.01 | 2  | 2  |  | 2 | TFDLYANVRPC[339]VSIIEGYK          | 1 |
|                                                                                                                                                                                                                          |      |       |      |      |    |    |  | 2 | C[339]REVAESC[339]K               | 2 |

|                                                                                                                                                                                                                                           |      |       |      |      |   |   |   |                                       |   |
|-------------------------------------------------------------------------------------------------------------------------------------------------------------------------------------------------------------------------------------------|------|-------|------|------|---|---|---|---------------------------------------|---|
| IDH3G_HUMAN (P51553) Isocitrate dehydrogenase [NAD] subunit gamma, mitochondrial precursor (EC 1.1.1.41) (Isocitric dehydrogenase) (NAD(+)-specific ICDH) [MASS=42794]                                                                    | *    | 2.04  | *    | *    | * | 1 | 2 | KKVTAVHK                              | 1 |
|                                                                                                                                                                                                                                           |      |       |      |      |   |   | 2 | NILGGTVFREPIIC[339]K                  | 2 |
| IDHP_HUMAN (P48735) Isocitrate dehydrogenase [NADP], mitochondrial precursor (EC 1.1.1.42) (Oxalosuccinate decarboxylase) (IDH) (NADP(+)-specific ICDH) (IDP) (ICD-M) [MASS=50909]                                                        | 1.00 | 10.62 | 0.93 | 0.13 | 5 | 3 | 2 | FAQM[147]LEKVC[330]VETVESGAM[147]TK   | 1 |
|                                                                                                                                                                                                                                           |      |       |      |      |   |   | 2 | DLAGC[339]IHGLSNVK                    | 1 |
|                                                                                                                                                                                                                                           |      |       |      |      |   |   | 2 | NILGGTVFREPIIC[330]K                  | 1 |
|                                                                                                                                                                                                                                           |      |       |      |      |   |   | 2 | DLAGC[330]IHGLSNVK                    | 2 |
| IF3X_HUMAN (O75153) Putative eukaryotic translation initiation factor 3 subunit (eIF-3) [MASS=146669]                                                                                                                                     | *    | 2.60  | *    | *    | * | 2 | 3 | DC[330]M[147]EHAVLPVDGATLAEVMRQRGINMR | 1 |
|                                                                                                                                                                                                                                           |      |       |      |      |   |   | 1 | HQVLNDR                               | 1 |
| IGS4B_HUMAN (Q8N126) Immunoglobulin superfamily member 4B precursor (Nectin-like protein 1) (TSLC1-like protein 1) (Synaptic cell adhesion molecule 3) (Brain immunoglobulin receptor) [MASS=43300]                                       | *    | 2.76  | *    | *    | * | 1 | 3 | GDQELHGEPTR                           | 1 |
| IGSF8_HUMAN (Q969P0) Immunoglobulin superfamily member 8 precursor (CD81 partner 3) (Glu-Trp-Ile EWI motif-containing protein 2) (EWI-2) (Keratinocytes-associated transmembrane protein 4) (KCT-4) (LIR-D1) (CD316 antigen) [MASS=65034] | *    | 2.28  | *    | *    | * | 1 | 2 | PEAPDTALGIVSTK                        | 1 |
| IL6RB_HUMAN (P40189) Interleukin-6 receptor beta chain precursor (IL-6R-beta) (Interleukin 6 signal transducer) (Membrane glycoprotein 130) (gp130) (Oncostatin M receptor) (CD130 antigen) (CDw130) [MASS=103522]                        | 0.21 | 4.79  | 2.04 | 0.00 | 1 | 2 | 2 | QAPPSKGPTVRTK                         | 1 |
|                                                                                                                                                                                                                                           |      |       |      |      |   |   | 3 | QVSSVNEEDFVRLKQQISDHISQSC[339]GSGQMK  | 1 |
| IMMT_HUMAN (Q16891) Mitochondrial inner membrane protein (Mitofilin) (p87/89) (Proliferation-inducing gene 4 protein) [MASS=83677]                                                                                                        | *    | 2.90  | *    | *    | * | 1 | 2 | PHITAAEGKLNHMIVDLDNVVK                | 1 |
| IP3KB_HUMAN (P27987) Inositol-trisphosphate 3-kinase B (EC 2.7.1.127) (Inositol 1,4,5-trisphosphate 3-kinase B) (IP3K B) (IP3 3-kinase B) (IP3K-B) [MASS=102376]                                                                          | *    | 1.27  | *    | *    | * | 1 | 2 | C[339]GSPTAMEIDKR                     | 1 |

|                                                                                                                                                                                                                                                                                                  |      |       |      |      |   |   |   |                                       |   |
|--------------------------------------------------------------------------------------------------------------------------------------------------------------------------------------------------------------------------------------------------------------------------------------------------|------|-------|------|------|---|---|---|---------------------------------------|---|
| IPO11_HUMAN (Q9UI26) Importin-11 (Imp11)<br>(Ran-binding protein 11) (RanBP11)<br>[MASS=112535]                                                                                                                                                                                                  | *    | 1.33  | *    | *    | * | 1 | 2 | MHVLHVLSC[330]VIER                    | 1 |
| IPPK_HUMAN (Q9H8X2) Inositol-<br>pentakisphosphate 2-kinase (EC 2.7.1.-)<br>(Inositol-1,3,4,5,6-pentakisphosphate 2-kinase)<br>(Ins(1,3,4,5,6)P5 2-kinase) (InsP5 2-kinase)<br>(IPK1 homolog) [MASS=56016]                                                                                       | 0.00 | 10.39 | 1.06 | 0.00 | 1 | 3 | 2 | C[339]GFIFPSSDVTHEM[147]KHK           | 1 |
|                                                                                                                                                                                                                                                                                                  |      |       |      |      |   |   | 3 | YLEEFPEERKTLQIDGPYDEAFYQK             | 1 |
|                                                                                                                                                                                                                                                                                                  |      |       |      |      |   |   | 2 | VC[330]EASPFSSR                       | 1 |
| IRAK3_HUMAN (Q9Y616) Interleukin-1<br>receptor-associated kinase 3 (EC 2.7.11.1)<br>(IRAK-3) (IL-1 receptor-associated kinase M)<br>(IRAK-M) [MASS=67752]                                                                                                                                        | *    | 1.85  | *    | *    | * | 1 | 2 | VPPC[330]PRNFSAK                      | 1 |
| ITPR1_HUMAN (Q14643) Inositol 1,4,5-<br>trisphosphate receptor type 1 (Type 1 inositol<br>1,4,5-trisphosphate receptor) (Type 1 InsP3<br>receptor) (IP3 receptor isoform 1) (InsP3R1)<br>(IP3R) [MASS=313943]                                                                                    | *    | 1.31  | *    | *    | * | 4 | 2 | LLLAIMESR                             | 1 |
|                                                                                                                                                                                                                                                                                                  |      |       |      |      |   |   | 3 | C[339]ESGGFIC[330]K                   | 1 |
|                                                                                                                                                                                                                                                                                                  |      |       |      |      |   |   | 1 | HAPFR                                 | 2 |
|                                                                                                                                                                                                                                                                                                  |      |       |      |      |   |   | 3 | SHSIVQKTAM[147]NWR                    | 1 |
| JAK3_HUMAN (P52333) Tyrosine-protein<br>kinase JAK3 (EC 2.7.10.2) (Janus kinase 3)<br>(JAK-3) (Leukocyte janus kinase) (L-JAK)<br>[MASS=125098]                                                                                                                                                  | *    | 6.14  | *    | *    | * | 3 | 3 | QSDVWSFGVVLYELFTYC[330]DK             | 1 |
|                                                                                                                                                                                                                                                                                                  |      |       |      |      |   |   | 3 | MMGC[330]ERDVPALC[339]RLELLEEGQR      | 1 |
|                                                                                                                                                                                                                                                                                                  |      |       |      |      |   |   | 3 | QQLPAPKWTELLALLIQQC[339]M[147]AYEPVQR | 2 |
| JHD1B_HUMAN (Q8NHM5) JmjC domain-<br>containing histone demethylation protein 1B<br>(EC 1.14.11.-) (F-box/LRR-repeat protein 10) (F-<br>box and leucine-rich repeat protein 10) (F-box<br>protein FBL10) (Protein JEMMA) (Jumonji<br>domain-containing EMSY-interactor methyltr<br>[MASS=152614] | 0.00 | 1.27  | *    | *    | * | 2 | 1 | IYEIEDR                               | 1 |
|                                                                                                                                                                                                                                                                                                  |      |       |      |      |   |   | 3 | VKKYC[330]LM[147]SVK                  | 1 |
| JHD2C_HUMAN (Q15652) Probable JmjC<br>domain-containing histone demethylation<br>protein 2C (EC 1.14.11.-) (Jumonji domain-<br>containing protein 1C) (Thyroid receptor-<br>interacting protein 8) (TRIP-8) [MASS=284523]                                                                        | *    | 1.10  | *    | *    | * | 1 | 2 | NSPSPWLHQPTPVTSDGIGLLSHIPVR           | 1 |
| JPH3_HUMAN (Q8WXH2) Junctophilin-3<br>(Junctophilin type 3) (JP-3) [MASS=81468]                                                                                                                                                                                                                  | 0.00 | 3.61  | 0.87 | 0.00 | 1 | 2 | 3 | GGAC[339]RGLGDDHRPEDR                 | 1 |
|                                                                                                                                                                                                                                                                                                  |      |       |      |      |   |   | 3 | GLGDDHRPEDR                           | 1 |

|                                                                                                                                                                                                    |                                          |       |      |      |   |   |   |                                          |   |
|----------------------------------------------------------------------------------------------------------------------------------------------------------------------------------------------------|------------------------------------------|-------|------|------|---|---|---|------------------------------------------|---|
| K0182_HUMAN (Q14687) Protein KIAA0182 (Fragment) [MASS=130322]                                                                                                                                     | 0.00                                     | 9.16  | 0.96 | 0.00 | 1 | 6 | 3 | SPFYPIPTPGSLPPLHPSAM[147]HLHLSGVR        | 1 |
|                                                                                                                                                                                                    |                                          |       |      |      |   |   | 2 | KC[330]LALPAM[147]HWPR                   | 1 |
|                                                                                                                                                                                                    |                                          |       |      |      |   |   | 3 | PPVPRAPDPAYIYDEFLLQQR                    | 1 |
|                                                                                                                                                                                                    |                                          |       |      |      |   |   | 2 | SLSM[147]LHYIRGAAPK                      | 1 |
|                                                                                                                                                                                                    |                                          |       |      |      |   |   | 3 | C[330]LALPAM[147]HWPR                    | 1 |
|                                                                                                                                                                                                    |                                          |       |      |      |   |   | 2 | PPVPAEAEHRPESTTRPGPNR                    | 1 |
| K0196_HUMAN (Q12768) Protein KIAA0196 [MASS=134286]                                                                                                                                                | *                                        | 0.60  | *    | *    | * | 1 | 2 | NLGMVC[339]R                             | 2 |
| K0310_HUMAN (O15027) Protein KIAA0310 [MASS=233516]                                                                                                                                                | *                                        | 0.78  | *    | *    | * | 1 | 3 | PTGIFQTSANSSFEPVK                        | 1 |
| K0971_HUMAN (Q9NYY8) Protein KIAA0971 [MASS=81462]                                                                                                                                                 | *                                        | 0.85  | *    | *    | * | 1 | 1 | GFLAM[147]K                              | 1 |
| K1688_HUMAN (Q9C0H5) Protein KIAA1688 [MASS=121285]                                                                                                                                                | *                                        | 2.12  | *    | *    | * | 1 | 3 | HM[147]DPVNDTKGVAISTYAKYC[330]YHK        | 1 |
|                                                                                                                                                                                                    |                                          |       |      |      |   |   | 3 | MC[330]DPGM[147]TAFEPEALGNLVEGLDFHR      | 1 |
|                                                                                                                                                                                                    |                                          |       |      |      |   |   | 3 | M[147]C[330]DPGM[147]TAFEPEALGNLVEGLDFHR | 2 |
| KCC2A_HUMAN (Q9UQM7) Calcium/calmodulin-dependent protein kinase type II alpha chain (EC 2.7.11.17) (CaM-kinase II alpha chain) (CaM kinase II alpha subunit) (CaMK-II subunit alpha) [MASS=54029] | 1.00                                     | 11.09 | 1.31 | 0.08 | 7 | 2 | 3 | MC[339]DPGM[147]TAFEPEALGNLVEGLDFHR      | 2 |
|                                                                                                                                                                                                    |                                          |       |      |      |   |   | 3 | NSKPVHTTILNPHIHLM[147]GDESAC[339]IAYIR   | 1 |
|                                                                                                                                                                                                    |                                          |       |      |      |   |   | 3 | NSKPVHTTILNPHIHLM[147]GDESAC[330]IAYIR   | 1 |
| 3                                                                                                                                                                                                  | M[147]C[339]DPGM[147]TAFEPEALGNLVEGLDFHR | 1     |      |      |   |   |   |                                          |   |
| KCC2B_HUMAN (Q13554) Calcium/calmodulin-dependent protein kinase type II beta chain (EC 2.7.11.17) (CaM-kinase II beta chain) (CaM kinase II subunit beta) (CaMK-II subunit beta) [MASS=72726]     | 1.00                                     | 3.77  | 1.39 | 0.02 | 3 | 1 | 3 | IC[339]DPGLTSFEPEALGNLVEGM[147]DFHR      | 2 |
|                                                                                                                                                                                                    |                                          |       |      |      |   |   | 3 | IC[330]DPGLTSFEPEALGNLVEGM[147]DFHR      | 1 |
| KCC2G_HUMAN (Q13555) Calcium/calmodulin-dependent protein kinase type II gamma chain (EC 2.7.11.17) (CaM-kinase II gamma chain) (CaM kinase II gamma subunit) (CaMK-II subunit gamma) [MASS=62609] | 1.00                                     | 8.96  | 1.48 | 0.00 | 2 | 2 | 3 | TAPSAGM[147]QPQPSLC[339]SSAMRKQEIHK      | 1 |
|                                                                                                                                                                                                    |                                          |       |      |      |   |   | 3 | IC[330]DPGLTSFEPEALGNLVEGM[147]DFHK      | 1 |
|                                                                                                                                                                                                    |                                          |       |      |      |   |   | 3 | IC[339]DPGLTSFEPEALGNLVEGM[147]DFHK      | 1 |
| KCNH1_HUMAN (O95259) Potassium voltage-gated channel subfamily H member 1 (Voltage-gated potassium channel subunit Kv10.1) (Ether-a-go-go potassium channel 1) (hEAG1) (h-eag) [MASS=111422]       | *                                        | 5.66  | *    | *    | * | 4 | 3 | QTFENYEM[147]NSFEILM[147]YKKNR           | 1 |
|                                                                                                                                                                                                    |                                          |       |      |      |   |   | 2 | QTFENYEM[147]NSFEILM[147]YK              | 1 |
|                                                                                                                                                                                                    |                                          |       |      |      |   |   | 1 | GENVHK                                   | 2 |
|                                                                                                                                                                                                    |                                          |       |      |      |   |   | 2 | GIDTEKVLQIC[330]PK                       | 1 |



|                                                                                                                                                                                                                                                     |      |       |      |      |    |   |   |                                                   |   |
|-----------------------------------------------------------------------------------------------------------------------------------------------------------------------------------------------------------------------------------------------------|------|-------|------|------|----|---|---|---------------------------------------------------|---|
| KCNH3_HUMAN (Q9ULD8) Potassium voltage-gated channel subfamily H member 3 (Voltage-gated potassium channel subunit Kv12.2) (Ether-a-go-go-like potassium channel 2) (ELK channel 2) (ELK2) (Brain-specific eag-like channel 1) (BEC1) [MASS=117128] | *    | 0.65  | *    | *    | *  | 1 | 2 | QPKGKHK                                           | 1 |
|                                                                                                                                                                                                                                                     |      |       |      |      |    |   | 2 | FC[339]TGLTQIETLFK                                | 5 |
| KCRB_HUMAN (P12277) Creatine kinase B-type (EC 2.7.3.2) (Creatine kinase B chain) (B-CK) [MASS=42644]                                                                                                                                               | 1.00 | 14.17 | 1.51 | 0.04 | 10 | 4 | 2 | FC[330]TGLTQIETLFK                                | 3 |
|                                                                                                                                                                                                                                                     |      |       |      |      |    |   | 2 | GFC[330]LPPHC[330]SR                              | 1 |
|                                                                                                                                                                                                                                                     |      |       |      |      |    |   | 3 | LEQGQAIDDLM[147]PAQK                              | 1 |
|                                                                                                                                                                                                                                                     |      |       |      |      |    |   | 3 | LAVEALSSLDGDLAGR                                  | 1 |
|                                                                                                                                                                                                                                                     |      |       |      |      |    |   | 2 | GFC[339]LPPHC[339]SR                              | 1 |
| KCRS_HUMAN (P17540) Creatine kinase, sarcomeric mitochondrial precursor (EC 2.7.3.2) (S-MtCK) (Mib-CK) (Basic-type mitochondrial creatine kinase) [MASS=47520]                                                                                      | 0.00 | 3.82  | *    | *    | *  | 1 | 2 | LGYILTC[339]PSNLGTGLR                             | 2 |
| KCRU_HUMAN (P12532) Creatine kinase, ubiquitous mitochondrial precursor (EC 2.7.3.2) (U-MtCK) (Mia-CK) (Acidic-type mitochondrial creatine kinase) [MASS=47036]                                                                                     | 1.00 | 8.87  | 1.27 | 0.03 | 4  | 2 | 2 | HNNC[330]M[147]ASHLTPAVYAR                        | 1 |
|                                                                                                                                                                                                                                                     |      |       |      |      |    |   | 2 | SEVELVQLVIDGVNYLIDC[339]ER                        | 1 |
|                                                                                                                                                                                                                                                     |      |       |      |      |    |   | 2 | HNNC[339]M[147]ASHLTPAVYAR                        | 2 |
| KI21A_HUMAN (Q7Z4S6) Kinesin family member 21A (Kinesin-like protein KIF2) (NY-REN-62 antigen) [MASS=187178]                                                                                                                                        | *    | 0.48  | *    | *    | *  | 1 | 2 | QVRPMSDK                                          | 1 |
| KIF17_HUMAN (Q9P2E2) Kinesin-like protein KIF17 (KIF3-related motor protein) [MASS=115113]                                                                                                                                                          | *    | 1.36  | *    | *    | *  | 1 | 3 | AGKLNLDLAGSER                                     | 2 |
| KIFA3_HUMAN (Q92845) Kinesin-associated protein 3 (Smg GDS-associated protein) [MASS=91205]                                                                                                                                                         | 0.00 | 8.21  | 0.48 | 0.00 | 1  | 3 | 3 | NVQLIC[330]EGNGLKM[147]LM[147]K                   | 1 |
|                                                                                                                                                                                                                                                     |      |       |      |      |    |   | 2 | SLNANTDITSLARKVVEEC[330]K                         | 1 |
|                                                                                                                                                                                                                                                     |      |       |      |      |    |   | 3 | NDM[147]VEM[147]DIVEKLVKM[147]IPC[330]EHEDLLNITLR | 1 |
| KIRR2_HUMAN (Q6UWL6) Kin of IRRE-like protein 2 precursor (Kin of irregular chiasm-like protein 2) (Nephrin-like protein 3) [MASS=75093]                                                                                                            | *    | 3.95  | *    | *    | *  | 1 | 3 | IVAGVAAATTTLLMVITGVALC[339]C[339]WRHSK            | 1 |

|                                                                                                                                                                                                                                                                 |      |       |      |      |   |   |             |                                                                                           |             |
|-----------------------------------------------------------------------------------------------------------------------------------------------------------------------------------------------------------------------------------------------------------------|------|-------|------|------|---|---|-------------|-------------------------------------------------------------------------------------------|-------------|
| KKCC2_HUMAN (Q96RR4)<br>Calcium/calmodulin-dependent protein kinase kinase 2 (EC 2.7.11.17) (Calcium/calmodulin-dependent protein kinase kinase beta) (CaM-kinase kinase beta) (CaM-KK beta) (CaMKK beta) [MASS=64731]                                          | *    | 1.36  | *    | *    | * | 1 | 2           | LDHPNVVK                                                                                  | 1           |
| KLDC3_HUMAN (Q9BQ90) Kelch domain-containing protein 3 (Protein Peas) (Testis intracellular mediator protein) [MASS=43088]                                                                                                                                      | 0.00 | 4.45  | 0.48 | 0.00 | 1 | 1 | 3           | TEAWLDC[330]PPTPVLPPEGR                                                                   | 1           |
| KNG1_HUMAN (P01042) Kininogen-1 precursor (Alpha-2-thiol proteinase inhibitor) [Contains: Kininogen-1 heavy chain; Bradykinin (Kallidin I); Lysyl-bradykinin (Kallidin II); Kininogen-1 light chain; Low molecular weight growth-promoting factor] [MASS=71945] | *    | 4.19  | *    | *    | * | 1 | 3           | LDDDLHQGGHVLDHGHKHKHGHGHGK                                                                | 1           |
| KNTC1_HUMAN (P50748) Kinetochore-associated protein 1 (Rough deal homolog) (hRod) (HsROD) (Rod) [MASS=250747]                                                                                                                                                   | *    | 0.63  | *    | *    | * | 2 | 1<br>1      | KLQGQIK<br>TLVNNLR                                                                        | 1<br>1      |
| KPYM_HUMAN (P14618) Pyruvate kinase isozymes M1/M2 (EC 2.7.1.40) (Pyruvate kinase muscle isozyme) (Cytosolic thyroid hormone-binding protein) (CTHBP) (THBP1) [MASS=57805]                                                                                      | 0.94 | 12.26 | 0.97 | 0.00 | 1 | 3 | 2<br>3<br>3 | NTGIIC[339]TIGPASR<br>IENHEGVRRFDEILEASDGIMVAR<br>PTRAEAGSDVANAVLDGADC[339]IM[147]LSGETAK | 1<br>1<br>1 |
| L2GL2_HUMAN (Q6P1M3) Lethal(2) giant larvae protein homolog 2 (HGL) [MASS=113447]                                                                                                                                                                               | *    | 1.76  | *    | *    | * | 2 | 1<br>3      | FSLSTK<br>NHRPGNGAGPKK                                                                    | 1<br>1      |
| LAMA1_HUMAN (P25391) Laminin alpha-1 chain precursor (Laminin A chain) [MASS=337156]                                                                                                                                                                            | *    | 1.17  | *    | *    | * | 3 | 2<br>2<br>2 | TLNADLM[147]TLSHR<br>DPIYVGGLPR<br>GC[330]LLEPIRSVSFLK                                    | 1<br>1<br>1 |
| LAMA3_HUMAN (Q16787) Laminin alpha-3 chain precursor (Epiligrin 170 kDa subunit) (E170) (Nicein subunit alpha) [MASS=189304]                                                                                                                                    | *    | 1.28  | *    | *    | * | 1 | 3           | LVVDGLRAREGSLPGNSTISIR                                                                    | 1           |
| LAMA5_HUMAN (O15230) Laminin alpha-5 chain precursor [MASS=399709]                                                                                                                                                                                              | *    | 0.57  | *    | *    | * | 3 | 1<br>1<br>2 | LLGPQR<br>GIKALGK<br>VPMKFNGR                                                             | 3<br>1<br>1 |

|                                                                                                                                                                                                                                                        |                       |      |      |      |   |   |   |                                            |   |
|--------------------------------------------------------------------------------------------------------------------------------------------------------------------------------------------------------------------------------------------------------|-----------------------|------|------|------|---|---|---|--------------------------------------------|---|
| LAMC3_HUMAN (Q9Y6N6) Laminin gamma-3 chain precursor (Laminin 12 gamma 3 subunit) [MASS=172051]                                                                                                                                                        | *                     | 0.82 | *    | *    | * | 1 | 3 | PEGQYLRPGEDER                              | 1 |
| LBXCO_HUMAN (P84550) Ladybird homeobox corepressor 1 [MASS=99830]                                                                                                                                                                                      | 0.00                  | 5.08 | 0.57 | 0.00 | 1 | 2 | 2 | GLGLATGASGPAGPGGGGAGVR                     | 1 |
|                                                                                                                                                                                                                                                        |                       |      |      |      |   |   | 2 | GGAGGGGGGGPGGC[330]GAEM[147]APGPPPHK       | 1 |
| LCMT2_HUMAN (O60294) Leucine carboxyl methyltransferase 2 (EC 2.1.1.-) (p21WAF1/CIP1 promoter-interacting protein) [MASS=75601]                                                                                                                        | *                     | 1.02 | *    | *    | * | 1 | 1 | LYHTM[147]TR                               | 1 |
| LDH6A_HUMAN (Q6ZMR3) L-lactate dehydrogenase A-like 6A (EC 1.1.1.27) [MASS=36507]                                                                                                                                                                      | 0.97                  | 3.61 | 0.98 | 0.00 | 1 | 1 | 2 | VIGSGC[330]NLDSAR                          | 1 |
| LDLR_HUMAN (P01130) Low-density lipoprotein receptor precursor (LDL receptor) [MASS=95376]                                                                                                                                                             | *                     | 5.23 | *    | *    | * | 2 | 3 | C[339]DGGPDC[339]KDKSDEENC[330]AVATC[339]R | 1 |
|                                                                                                                                                                                                                                                        |                       |      |      |      |   |   | 3 | AIVVDPVHGFM[147]YWTDWGTPAKIK               | 1 |
| LEG1_HUMAN (P09382) Galectin-1 (Lectin galactoside-binding soluble 1) (Beta-galactoside-binding lectin L-14-I) (Lactose-binding lectin 1) (S-Lac lectin 1) (Galaptin) (14 kDa lectin) (HPL) (HBL) (Putative MAPK-activating protein MP12) [MASS=14584] | 0.99                  | 8.96 | 0.94 | 0.00 | 1 | 1 | 2 | DSNNLC[330]LHFNPR                          | 1 |
| LEG9_HUMAN (O00182) Galectin-9 (HOM-HD-21) (Ecalectin) [MASS=39518]                                                                                                                                                                                    | 0.00                  | 4.51 | 0.30 | 0.00 | 1 | 1 | 3 | GQSFSVWILC[330]EAHC[330]LJK                | 1 |
| LETM1_HUMAN (O95202) Leucine zipper-EF-hand-containing transmembrane protein 1, mitochondrial precursor [MASS=83354]                                                                                                                                   | 0.99                  | 7.17 | 1.44 | 0.00 | 1 | 3 | 3 | APWTSTSVGFVAVGPQC[339]LPVR                 | 1 |
|                                                                                                                                                                                                                                                        |                       |      |      |      |   |   | 2 | LFEDELTLDNLTRPQLVALC[339]K                 | 1 |
|                                                                                                                                                                                                                                                        |                       |      |      |      |   |   | 1 | EKAEKEVAEVK                                | 1 |
| LPPRC_HUMAN (P42704) 130 kDa leucine-rich protein (LRP 130) (GP130) (Leucine-rich PPR motif-containing protein) [MASS=145200]                                                                                                                          | 0.90                  | 4.01 | 1.19 | 0.00 | 1 | 4 | 2 | IPENIYR                                    | 1 |
|                                                                                                                                                                                                                                                        |                       |      |      |      |   |   | 3 | MPC[330]FYLRSC[339]GSLPELKLEER             | 1 |
|                                                                                                                                                                                                                                                        |                       |      |      |      |   |   | 1 | ILGFM[147]K                                | 1 |
| 2                                                                                                                                                                                                                                                      | C[339]GAIAEQTPILLFLLR | 1    |      |      |   |   |   |                                            |   |
| LRBA_HUMAN (P50851) Lipopolysaccharide-responsive and beige-like anchor protein (CDC4-like protein) (Beige-like protein) [MASS=319159]                                                                                                                 | *                     | 0.49 | *    | *    | * | 1 | 2 | VGVGTSFGLPQTRR                             | 1 |
| LRC41_HUMAN (Q15345) Leucine-rich repeat-containing protein 41 (Protein Muf1) [MASS=92287]                                                                                                                                                             | 0.00                  | 4.27 | 0.99 | 0.00 | 1 | 3 | 3 | QLTIC[330]NM[147]LQGATELVAEPNR             | 1 |
|                                                                                                                                                                                                                                                        |                       |      |      |      |   |   | 1 | VDHPSQR                                    | 1 |
|                                                                                                                                                                                                                                                        |                       |      |      |      |   |   | 2 | PDGLLEFAK                                  | 1 |
| LRC8E_HUMAN (Q6NSJ5) Leucine-rich repeat-containing protein 8E [MASS=90277]                                                                                                                                                                            | *                     | 2.89 | *    | *    | * | 1 | 3 | M[147]HVEEGDILYTM[147]YIRQTVLKVVC[339]K    | 1 |

|                                                                                                                                                                                |      |      |      |      |   |   |   |                                                  |   |
|--------------------------------------------------------------------------------------------------------------------------------------------------------------------------------|------|------|------|------|---|---|---|--------------------------------------------------|---|
| LRIG3_HUMAN (Q6UXM1) Leucine-rich repeats and immunoglobulin-like domains protein 3 precursor (LIG-3) [MASS=123433]                                                            | 0.00 | 5.90 | 0.67 | 0.00 | 1 | 4 | 3 | RLILQGNRIR                                       | 1 |
|                                                                                                                                                                                |      |      |      |      |   |   | 3 | LARLPEPLPSWVARLDLSHNR                            | 1 |
|                                                                                                                                                                                |      |      |      |      |   |   | 2 | TDFQEENHIC[330]TFK                               | 1 |
|                                                                                                                                                                                |      |      |      |      |   |   | 3 | KLLNTSYSHNEGPGMKNLIC[330]LNK                     | 1 |
| LRP1B_HUMAN (Q9NZR2) Low-density lipoprotein receptor-related protein 1B precursor (Low-density lipoprotein receptor-related protein-deleted in tumor) (LRP-DIT) [MASS=515496] | *    | 0.70 | *    | *    | * | 2 | 2 | PPLFGLQIYDPRK                                    | 1 |
|                                                                                                                                                                                |      |      |      |      |   |   | 2 | LYMDGQNC[330]RNSLGSVDERK                         | 1 |
| LRP2_HUMAN (P98164) Low-density lipoprotein receptor-related protein 2 precursor (Megalin) (Glycoprotein 330) (gp330) [MASS=521928]                                            | 0.00 | 0.71 | 0.34 | 0.00 | 1 | 2 | 2 | FPDGAYC[330]QATM[147]FEC[330]K                   | 1 |
|                                                                                                                                                                                |      |      |      |      |   |   | 3 | ANKFTETNPQVYYQASLR                               | 1 |
| LRP4_HUMAN (O75096) Low-density lipoprotein receptor-related protein 4 precursor (Multiple epidermal growth factor-like domains 7) [MASS=215964]                               | 0.00 | 0.92 | 1.16 | 0.00 | 1 | 1 | 3 | ISSHAC[339]AQSLDKFLLFAR                          | 1 |
| LRRK1_HUMAN (Q38SD2) Leucine-rich repeat serine/threonine-protein kinase 1 (EC 2.7.11.1) [MASS=227842]                                                                         | *    | 4.71 | *    | *    | * | 4 | 3 | GDRGGARDLLEEAC[330]DQC[330]ASQLEK                | 1 |
|                                                                                                                                                                                |      |      |      |      |   |   | 3 | LPLYAAIKSGNEDIAIFLLR                             | 1 |
|                                                                                                                                                                                |      |      |      |      |   |   | 3 | SLEGQEGLRQLIFHVTC[330]SMKDVGSTIGC[330]QR         | 1 |
|                                                                                                                                                                                |      |      |      |      |   |   | 3 | GQLLSIPAAYGDLEM[147]VRYLLSKR                     | 1 |
| LTBP3_HUMAN (Q9NS15) Latent-transforming growth factor beta-binding protein 3 precursor (LTBP-3) [MASS=139246]                                                                 | *    | 6.30 | *    | *    | * | 4 | 3 | IESSNAESAAPSQHLLPHPK                             | 1 |
|                                                                                                                                                                                |      |      |      |      |   |   | 3 | QPC[330]GSNPLPGLTK                               | 1 |
|                                                                                                                                                                                |      |      |      |      |   |   | 3 | ARC[339]VDIDEC[339]R                             | 1 |
|                                                                                                                                                                                |      |      |      |      |   |   | 3 | M[147]PGPRGAAGGLAPEM[147]RGAGAAGLLLLLLLLLLLGLGGR | 1 |
| LTK_HUMAN (P29376) Leukocyte tyrosine kinase receptor precursor (EC 2.7.10.1) (Protein tyrosine kinase 1) [MASS=91653]                                                         | *    | 2.20 | *    | *    | * | 1 | 3 | SWGGSPLGPWLSSGLKPLK                              | 1 |
| LUZP1_HUMAN (Q86V48) Leucine zipper protein 1 [MASS=120274]                                                                                                                    | *    | 3.62 | *    | *    | * | 2 | 2 | RSSSEGLSK                                        | 1 |
|                                                                                                                                                                                |      |      |      |      |   |   | 3 | AEDELLDLQDKVIAEGSNSSMLAEIEVLR                    | 1 |
| LY75_HUMAN (O60449) Lymphocyte antigen 75 precursor (DEC-205) (gp200-MR6) (CD205 antigen) [MASS=198270]                                                                        | *    | 1.97 | *    | *    | * | 2 | 2 | VEC[339]EHGFGRVVC[339]K                          | 1 |
|                                                                                                                                                                                |      |      |      |      |   |   | 3 | YSPDSAANKVQC[330]SEQWIPFQNK                      | 1 |
| LYPA1_HUMAN (O75608) Acyl-protein thioesterase 1 (EC 3.1.2.-) (Lysophospholipase 1) (Lysophospholipase I) [MASS=24669]                                                         | *    | 7.83 | *    | *    | * | 1 | 3 | TYEGMM[147]HSSC[339]QQEMMDVK                     | 1 |

|                                                                                                                                                                                                                                                                |      |       |      |      |   |   |   |                                          |   |
|----------------------------------------------------------------------------------------------------------------------------------------------------------------------------------------------------------------------------------------------------------------|------|-------|------|------|---|---|---|------------------------------------------|---|
| M3K12_HUMAN (Q12852) Mitogen-activated protein kinase kinase kinase 12 (EC 2.7.11.25) (Mixed lineage kinase) (Leucine-zipper protein kinase) (ZPK) (Dual leucine zipper bearing kinase) (DLK) (MAPK-upstream kinase) (MUK) [MASS=93188]                        | 0.00 | 5.01  | 1.02 | 0.00 | 1 | 3 | 2 | KLDPDTSDC[330]TPEK                       | 1 |
|                                                                                                                                                                                                                                                                |      |       |      |      |   |   | 3 | STKM[147]SFAGTVAWM[147]APEVIR            | 1 |
|                                                                                                                                                                                                                                                                |      |       |      |      |   |   | 2 | C[339]PGLLKPHPSR                         | 1 |
| M4K2_HUMAN (Q12851) Mitogen-activated protein kinase kinase kinase kinase 2 (EC 2.7.11.1) (MAPK/ERK kinase kinase kinase 2) (MEK kinase kinase 2) (MEKKK 2) (Germinal center kinase) (GC kinase) (Rab8-interacting protein) (B lymphocyte serine/threonine-pro | 0.00 | 4.88  | 3.93 | 0.00 | 1 | 2 | 3 | LISHRC[330]SWLYC[330]VNNVLLSLSGK         | 1 |
|                                                                                                                                                                                                                                                                |      |       |      |      |   |   | 3 | ELPQVC[339]VGAEGPEGPGC[339]R             | 1 |
| MACF4_HUMAN (Q96PK2) Microtubule-actin crosslinking factor 1, isoform 4 [MASS=670146]                                                                                                                                                                          | 0.00 | 1.03  | 1.23 | 0.00 | 1 | 3 | 2 | IEIISHM[147]KQSTSC[339]LDSEEIR           | 1 |
|                                                                                                                                                                                                                                                                |      |       |      |      |   |   | 2 | QLIGTQREDQTAVSVR                         | 1 |
|                                                                                                                                                                                                                                                                |      |       |      |      |   |   | 3 | EGLLTNEAVLSPGM[147]M[147]HGIVDPENC[339]R | 1 |
| MAON_HUMAN (Q16798) NADP-dependent malic enzyme, mitochondrial precursor (EC 1.1.1.40) (NADP-ME) (Malic enzyme 3) [MASS=67054]                                                                                                                                 | 0.99 | 3.15  | 1.23 | 0.05 | 2 | 1 | 2 | FGINC[339]LIQFEDFANANAFR                 | 2 |
| MAP2_HUMAN (P11137) Microtubule-associated protein 2 (MAP 2) (MAP-2) [MASS=199538]                                                                                                                                                                             | 0.94 | 2.46  | 1.00 | 0.00 | 1 | 3 | 2 | YTRPTHLSC[330]VK                         | 1 |
|                                                                                                                                                                                                                                                                |      |       |      |      |   |   | 3 | KTEVQAHSPSRK                             | 1 |
|                                                                                                                                                                                                                                                                |      |       |      |      |   |   | 3 | ISDFGQMASGLNIDRRATELK                    | 1 |
| MBD4_HUMAN (O95243) Methyl-CpG-binding domain protein 4 (EC 3.2.2.-) (Methyl-CpG-binding protein MBD4) (Methyl-CpG-binding endonuclease 1) (Mismatch-specific DNA N-glycosylase) [MASS=66050]                                                                  | 0.22 | 15.69 | 1.17 | 0.08 | 2 | 4 | 3 | DC[339]SMAALTSHLQNSNNSNWNLR              | 1 |
|                                                                                                                                                                                                                                                                |      |       |      |      |   |   | 2 | LVPDPPNDRKEDVAMELER                      | 1 |
|                                                                                                                                                                                                                                                                |      |       |      |      |   |   | 3 | DC[339]SMAALTSHLQNSNNSNWNLRTRSK          | 1 |
|                                                                                                                                                                                                                                                                |      |       |      |      |   |   | 3 | GAAPTVTSSERLVPDPPNDR                     | 1 |
| MCAT_HUMAN (O43772) Mitochondrial carnitine/acylcarnitine carrier protein (Carnitine/acylcarnitine translocase) (CAC) (Solute carrier family 25 member 20) [MASS=32944]                                                                                        | 0.00 | 7.97  | 1.22 | 0.00 | 1 | 1 | 3 | GMAAPIIGVTPMFAVC[339]FFGFGLGK            | 1 |

|                                                                                                                                                                                                                                                                             |   |      |   |   |   |   |        |                                       |        |
|-----------------------------------------------------------------------------------------------------------------------------------------------------------------------------------------------------------------------------------------------------------------------------|---|------|---|---|---|---|--------|---------------------------------------|--------|
| MCCC2_HUMAN (Q9HCC0) Methylcrotonoyl-CoA carboxylase beta chain, mitochondrial precursor (EC 6.4.1.4) (3-Methylcrotonyl-CoA carboxylase 2) (MCCase subunit beta) (3-methylcrotonyl-CoA:carbon dioxide ligase subunit beta) (3-Methylcrotonyl-CoA carboxylase n [MASS=61333] | * | 6.04 | * | * | * | 2 | 3<br>2 | LVLGLSFSAALNAPIEKDFGIFRM<br>AQEIAMQNR | 1<br>1 |
| MCF2L_HUMAN (O15068) Guanine nucleotide exchange factor DBS (DBL's big sister) (MCF2-transforming sequence-like protein) (Fragment) [MASS=123983]                                                                                                                           | * | 1.81 | * | * | * | 1 | 2      | M[147]KVPVIM[147]LSSVPDLHGYIDK        | 1      |
| MCM3A_HUMAN (O60318) 80 kDa MCM3-associated protein (GANP protein) [MASS=218403]                                                                                                                                                                                            | * | 0.76 | * | * | * | 1 | 3      | TILENHFGKIAKVQR                       | 1      |
| MCM6_HUMAN (Q14566) DNA replication licensing factor MCM6 (p105MCM) [MASS=92889]                                                                                                                                                                                            | * | 2.68 | * | * | * | 1 | 3      | ASLRLGFSEYC[339]RISNLIVLHLR           | 1      |

|                                                                                                                                                                                     |      |       |      |      |    |   |  |   |                                      |   |
|-------------------------------------------------------------------------------------------------------------------------------------------------------------------------------------|------|-------|------|------|----|---|--|---|--------------------------------------|---|
|                                                                                                                                                                                     |      |       |      |      |    |   |  | 3 | GYLGPEQLPDC[339]LKGC[339]DVVVIPAGVPR | 1 |
|                                                                                                                                                                                     |      |       |      |      |    |   |  | 2 | TIPLISQC[339]TPK                     | 4 |
|                                                                                                                                                                                     |      |       |      |      |    |   |  | 2 | SQETEC[339]TYFSTPLLLGK               | 3 |
|                                                                                                                                                                                     |      |       |      |      |    |   |  | 2 | GYLGPEQLPDC[339]LK                   | 3 |
| MDHM_HUMAN (P40926) Malate dehydrogenase, mitochondrial precursor (EC 1.1.1.37) [MASS=35531]                                                                                        | 1.00 | 32.25 | 1.39 | 0.04 | 24 | 7 |  | 2 | TIPLISQC[330]TPK                     | 2 |
|                                                                                                                                                                                     |      |       |      |      |    |   |  | 2 | GYLGPEQLPDC[330]LK                   | 2 |
|                                                                                                                                                                                     |      |       |      |      |    |   |  | 2 | SQETEC[339]TYFSTPLLLGKK              | 1 |
|                                                                                                                                                                                     |      |       |      |      |    |   |  | 2 | GC[339]DVVVIPAGVPR                   | 2 |
|                                                                                                                                                                                     |      |       |      |      |    |   |  | 3 | GYLGPEQLPDC[330]LKGC[330]DVVVIPAGVPR | 1 |
|                                                                                                                                                                                     |      |       |      |      |    |   |  | 1 | TIPLISQC[339]TPK                     | 2 |
|                                                                                                                                                                                     |      |       |      |      |    |   |  | 1 | GC[339]DVVVIPAGVPR                   | 1 |
|                                                                                                                                                                                     |      |       |      |      |    |   |  | 2 | EGVVEC[339]SFVK                      | 1 |
|                                                                                                                                                                                     |      |       |      |      |    |   |  | 2 | SQETEC[330]TYFSTPLLLGK               | 1 |
|                                                                                                                                                                                     |      |       |      |      |    |   |  | 1 | TIPLISQC[330]TPK                     | 1 |
| MDN1_HUMAN (Q9NU22) Midasin (MIDAS-containing protein) [MASS=632816]                                                                                                                | 0.00 | 0.64  | 0.20 | 0.00 | 1  | 4 |  | 1 | IGLSYR                               | 1 |
|                                                                                                                                                                                     |      |       |      |      |    |   |  | 2 | YKVTADFMAQAC[339]LR                  | 1 |
|                                                                                                                                                                                     |      |       |      |      |    |   |  | 3 | KFEAVLSEPC[330]R                     | 1 |
|                                                                                                                                                                                     |      |       |      |      |    |   |  | 1 | RENKR                                | 1 |
| MDR1_HUMAN (P08183) Multidrug resistance protein 1 (EC 3.6.3.44) (P-glycoprotein 1) (CD243 antigen) [MASS=141461]                                                                   | *    | 0.39  | *    | *    | *  | 1 |  | 1 | KNFFK                                | 3 |
| MGA_HUMAN (O43451) Maltase-glucoamylase, intestinal [Includes: Maltase (EC 3.2.1.20) (Alpha-glucoamidase); Glucoamylase (EC 3.2.1.3) (Glucan 1,4-alpha-glucoamidase)] [MASS=209721] | 0.00 | 0.97  | 0.42 | 0.00 | 1  | 2 |  | 2 | TLC[330]MDAVQHWGK                    | 1 |
|                                                                                                                                                                                     |      |       |      |      |    |   |  | 1 | IGLHLR                               | 1 |

|                                                                                                                                                                                                       |      |       |      |      |   |   |   |                                     |   |
|-------------------------------------------------------------------------------------------------------------------------------------------------------------------------------------------------------|------|-------|------|------|---|---|---|-------------------------------------|---|
| MGST3_HUMAN (O14880) Microsomal glutathione S-transferase 3 (EC 2.5.1.18) (Microsomal GST-3) (Microsomal GST-III) [MASS=16516]                                                                        | 1.00 | 30.26 | 1.46 | 0.05 | 5 | 2 | 3 | VEYPIM[147]YSTDPENGHIFNC[330]IQR    | 1 |
|                                                                                                                                                                                                       |      |       |      |      |   |   | 2 | YKVEYPIM[147]YSTDPENGHIFNC[339]IQR  | 1 |
|                                                                                                                                                                                                       |      |       |      |      |   |   | 3 | VEYPIMYSTDPENGHIFNC[339]IQR         | 1 |
|                                                                                                                                                                                                       |      |       |      |      |   |   | 3 | YKVEYPIMYSTDPENGHIFNC[339]IQR       | 1 |
|                                                                                                                                                                                                       |      |       |      |      |   |   | 3 | YKVEYPIM[147]YSTDPENGHIFNC[339]IQR  | 1 |
| MICA3_HUMAN (Q7RTP6) Protein MICAL-3 [MASS=109910]                                                                                                                                                    | *    | 5.74  | *    | *    | * | 3 | 3 | C[330]EYC[339]ATTLRLSAYAYDIEDGK     | 1 |
|                                                                                                                                                                                                       |      |       |      |      |   |   | 2 | ALWAKLDKR                           | 1 |
|                                                                                                                                                                                                       |      |       |      |      |   |   | 3 | HLYDTGETKDIHLEMESLVNSRTPK           | 1 |
| MIRO1_HUMAN (Q8IXI2) Mitochondrial Rho GTPase 1 (EC 3.6.5.-) (MIRO-1) (hMiro-1) (Ras homolog gene family member T1) (Rac-GTP-binding protein-like protein) [MASS=70784]                               | *    | 5.66  | *    | *    | * | 2 | 2 | LTTMAMYPHVTQADLK                    | 1 |
|                                                                                                                                                                                                       |      |       |      |      |   |   | 2 | NVVRKHISDGVADSGTLK                  | 1 |
| MKLN1_HUMAN (Q9UL63) Muskelin [MASS=84767]                                                                                                                                                            | 0.00 | 1.50  | 0.10 | 0.00 | 1 | 1 | 3 | LC[330]RPSKDYLLR                    | 1 |
| MLH3_HUMAN (Q9UHC1) DNA mismatch repair protein Mlh3 (MutL protein homolog 3) [MASS=163711]                                                                                                           | *    | 1.38  | *    | *    | * | 2 | 3 | GSERETQTMGMM[147]SR                 | 1 |
|                                                                                                                                                                                                       |      |       |      |      |   |   | 1 | LIGFSK                              | 1 |
| MMSA_HUMAN (Q02252) Methylmalonate-semialdehyde dehydrogenase [acylating], mitochondrial precursor (EC 1.2.1.27) (MMSDH) (Malonate-semialdehyde dehydrogenase [acylating]) (EC 1.2.1.18) [MASS=57839] | *    | 4.49  | *    | *    | * | 1 | 3 | GYENGNFVGPTIISNVKPNM[147]JTC[339]YK | 1 |
| MOG_HUMAN (Q16653) Myelin-oligodendrocyte glycoprotein precursor [MASS=28179]                                                                                                                         | 0.86 | 9.72  | 0.92 | 0.00 | 1 | 2 | 3 | ALVGDEVELPC[339]R                   | 1 |
|                                                                                                                                                                                                       |      |       |      |      |   |   | 2 | FSDEGGFTC[330]FFR                   | 1 |
| MOT8_HUMAN (P36021) Monocarboxylate transporter 8 (MCT 8) (X-linked PEST-containing transporter) (MCT 7) [MASS=66400]                                                                                 | 0.00 | 2.77  | 0.94 | 0.00 | 1 | 1 | 2 | ETWVLLVC[339]IGATSGLGR              | 1 |
| MP2K5_HUMAN (Q13163) Dual specificity mitogen-activated protein kinase kinase 5 (EC 2.7.12.2) (MAP kinase kinase 5) (MAPKK 5) (MAPK/ERK kinase 5) [MASS=48968]                                        | 0.00 | 4.11  | 1.86 | 0.00 | 1 | 1 | 3 | C[339]DSSYIIGFYGAFFVENR             | 1 |
| MPCP_HUMAN (Q00325) Phosphate carrier protein, mitochondrial precursor (PTP) (Solute carrier family 25 member 3) [MASS=40095]                                                                         | 0.48 | 1.66  | 1.44 | 0.00 | 1 | 1 | 1 | FAC[339]FER                         | 1 |
| MPP9_HUMAN (Q99550) M-phase phosphoprotein 9 [MASS=78084]                                                                                                                                             | 0.00 | 1.59  | *    | *    | * | 1 | 1 | QVEHENM[147]LSLR                    | 1 |



|                                                                                                                                                                             |      |       |      |      |   |   |   |                                           |   |
|-----------------------------------------------------------------------------------------------------------------------------------------------------------------------------|------|-------|------|------|---|---|---|-------------------------------------------|---|
| MSH5_HUMAN (O43196) MutS protein homolog 5 [MASS=92875]                                                                                                                     | *    | 7.67  | *    | *    | * | 3 | 3 | QVGLITFMALVGSFVPAEEAEIGAVDAIFTR           | 1 |
|                                                                                                                                                                             |      |       |      |      |   |   | 2 | LLSGNYSFIPDAMTATEK                        | 1 |
|                                                                                                                                                                             |      |       |      |      |   |   | 2 | VITGPNSSGKSIYLK                           | 1 |
|                                                                                                                                                                             |      |       |      |      |   |   | 3 | QVC[330]QLPGLFSYAQHIASIDGR                | 2 |
| MTCH2_HUMAN (Q9Y6C9) Mitochondrial carrier homolog 2 (Met-induced mitochondrial protein) [MASS=33331]                                                                       | 1.00 | 11.22 | 0.96 | 0.06 | 4 | 2 | 3 | QVC[339]QLPGLFSYAQHIASIDGR                | 1 |
|                                                                                                                                                                             |      |       |      |      |   |   | 2 | LC[330]SGVLGTVVHGK                        | 1 |
| MTMR5_HUMAN (O95248) SET-binding factor 1 (Sbf1) (Myotubularin-related protein 5) [MASS=208255]                                                                             | *    | 0.59  | *    | *    | * | 1 | 2 | DKGPSLRTLRSR                              | 1 |
| MTMR7_HUMAN (Q9Y216) Myotubularin-related protein 7 (EC 3.1.3.-) [MASS=75806]                                                                                               | *    | 2.12  | *    | *    | * | 1 | 2 | IQERTYSLWAHLWK                            | 1 |
| MTX1_HUMAN (Q13505) Metaxin-1 [MASS=35777]                                                                                                                                  | *    | 5.05  | *    | *    | * | 1 | 3 | APGTRTLGMAEEDDEE                          | 1 |
| MUC2_HUMAN (Q02817) Mucin-2 precursor (Intestinal mucin-2) [MASS=540296]                                                                                                    | *    | 0.17  | *    | *    | * | 1 | 3 | C[339]EQTHC[330]IHK                       | 1 |
| MY18A_HUMAN (Q92614) Myosin-18A (Myosin XVIIIa) (Myosin containing PDZ domain) (Molecule associated with JAK3 N-terminus) (MAJN) [MASS=233113]                              | 0.00 | 2.00  | *    | *    | * | 3 | 2 | SLARTDEAR                                 | 1 |
|                                                                                                                                                                             |      |       |      |      |   |   | 2 | ALLADAQLM[147]LDHLK                       | 1 |
|                                                                                                                                                                             |      |       |      |      |   |   | 2 | LTAELQDTKLHLEGQQVR                        | 1 |
| MYCB2_HUMAN (O75592) Probable ubiquitin ligase protein MYCBP2 (EC 6.3.2.-) (Myc-binding protein 2) (Protein associated with Myc) (Pam/highwire/rpm-1 protein) [MASS=510165] | *    | 1.75  | *    | *    | * | 6 | 1 | RKALM[147]R                               | 1 |
|                                                                                                                                                                             |      |       |      |      |   |   | 3 | DPPKGMIPPGTQLVKPK                         | 1 |
|                                                                                                                                                                             |      |       |      |      |   |   | 2 | SHPAQLKHK                                 | 1 |
|                                                                                                                                                                             |      |       |      |      |   |   | 2 | PDGRMSR                                   | 1 |
|                                                                                                                                                                             |      |       |      |      |   |   | 3 | EHTGKPTTSSSEAC[330]R                      | 1 |
|                                                                                                                                                                             |      |       |      |      |   |   | 3 | ELIC[330]GAC[330]SDVSRQMC[330]PKHGTDFLEYK | 1 |
| MYEF2_HUMAN (Q9P2K5) Myelin expression factor 2 (MyEF-2) (MST156) [MASS=64179]                                                                                              | 0.00 | 2.50  | 1.73 | 0.00 | 1 | 1 | 2 | GC[339]GVVEFKDEEFVKK                      | 1 |
| MYLK2_HUMAN (Q9H1R3) Myosin light chain kinase 2, skeletal/cardiac muscle (EC 2.7.11.18) (MLCK2) [MASS=64553]                                                               | 0.00 | 4.71  | *    | *    | * | 2 | 3 | APASEKGDGTLAQPSTSSQGPK                    | 1 |
|                                                                                                                                                                             |      |       |      |      |   |   | 1 | APASEK                                    | 2 |
| MYO10_HUMAN (Q9HD67) Myosin-10 (Myosin X) [MASS=237389]                                                                                                                     | *    | 0.53  | *    | *    | * | 1 | 3 | NSPKMSSLKLK                               | 1 |

|                                                                                                                                                                                                                                                                              |      |       |      |      |   |   |   |                                        |   |
|------------------------------------------------------------------------------------------------------------------------------------------------------------------------------------------------------------------------------------------------------------------------------|------|-------|------|------|---|---|---|----------------------------------------|---|
| MYOM2_HUMAN (P54296) Myomesin-2 (M-protein) (165 kDa titin-associated protein) (165 kDa connectin-associated protein) [MASS=164793]                                                                                                                                          | 0.00 | 5.53  | 0.19 | 0.00 | 1 | 5 | 3 | SHTVWERM[147]SVKLC[339]FTVQGFPTPVVQWYK | 1 |
|                                                                                                                                                                                                                                                                              |      |       |      |      |   |   | 3 | KDHGEYKATLK                            | 1 |
|                                                                                                                                                                                                                                                                              |      |       |      |      |   |   | 2 | LM[147]ALSNEIKNPTIPLK                  | 1 |
|                                                                                                                                                                                                                                                                              |      |       |      |      |   |   | 2 | EGETVTLKC[330]TMLVTPDLK                | 3 |
| MYPN_HUMAN (Q86TC9) Myopalladin (145 kDa sarcomeric protein) [MASS=145256]                                                                                                                                                                                                   | 0.00 | 1.36  | 1.53 | 0.00 | 1 | 1 | 2 | VNAQTAVR                               | 1 |
|                                                                                                                                                                                                                                                                              |      |       |      |      |   |   | 3 | MLQNLSASEGQLVVFEC[339]R                | 1 |
|                                                                                                                                                                                                                                                                              |      |       |      |      |   |   | 2 | VC[339]GSNLLSIC[339]K                  | 2 |
| MYPR_HUMAN (P60201) Myelin proteolipid protein (PLP) (Lipophilin) [MASS=29946]                                                                                                                                                                                               | 1.00 | 11.59 | 1.26 | 0.05 | 8 | 3 | 2 | VC[330]GSNLLSIC[330]K                  | 4 |
|                                                                                                                                                                                                                                                                              |      |       |      |      |   |   | 1 | VC[339]GSNLLSIC[339]K                  | 1 |
|                                                                                                                                                                                                                                                                              |      |       |      |      |   |   | 2 | TSASIGSLC[330]ADAR                     | 1 |
| MYST3_HUMAN (Q92794) Histone acetyltransferase MYST3 (EC 2.3.1.48) (EC 2.3.1.-) (MYST protein 3) (MOZ, YBF2/SAS3, SAS2 and TIP60 protein 3) (Runt-related transcription factor-binding protein 2) (Monocytic leukemia zinc finger protein) (Zinc finger protei [MASS=225054] | 0.00 | 0.90  | 0.58 | 0.00 | 1 | 2 | 2 | GM[147]WIC[330]QIC[330]RPR             | 1 |
|                                                                                                                                                                                                                                                                              |      |       |      |      |   |   | 1 | VRTGPGR                                | 1 |
|                                                                                                                                                                                                                                                                              |      |       |      |      |   |   | 2 | TSASIGSLC[339]ADAR                     | 1 |
| N4BM_HUMAN (O95298) NADH-ubiquinone oxidoreductase subunit B14.5b (EC 1.6.5.3) (EC 1.6.99.3) (Complex I-B14.5b) (CI-B14.5b) [MASS=14187]                                                                                                                                     | *    | 5.88  | *    | *    | * | 1 | 1 | LMGRGTKF                               | 2 |
|                                                                                                                                                                                                                                                                              |      |       |      |      |   |   | 2 | EM[147]FGYMK                           | 2 |
| NAC3_HUMAN (P57103) Sodium/calcium exchanger 3 precursor (Na+)/Ca(2+)-exchange protein 3) [MASS=103009]                                                                                                                                                                      | *    | 2.37  | *    | *    | * | 1 | 3 | DSVTAVVFVAFGTSVPDTFASK                 | 1 |

|                                                                                                                                                                                                                                             |      |       |      |      |   |   |   |                                  |   |
|---------------------------------------------------------------------------------------------------------------------------------------------------------------------------------------------------------------------------------------------|------|-------|------|------|---|---|---|----------------------------------|---|
| NALP1_HUMAN (Q9C000) NACHT, LRR and PYD-containing protein 1 (Death effector filament-forming ced-4-like apoptosis protein) (Nucleotide-binding domain and caspase recruitment domain) (Caspase recruitment domain protein 7) [MASS=165865] | 0.00 | 4.01  | 1.32 | 0.00 | 1 | 3 | 2 | AASHVAQANLKLLDVSK                | 1 |
|                                                                                                                                                                                                                                             |      |       |      |      |   |   | 3 | VHFPVAGSYRWPNTGLC[339]FVMR       | 1 |
|                                                                                                                                                                                                                                             |      |       |      |      |   |   | 3 | FLLGLLSDEGEREM[147]ENIFHC[330]R  | 1 |
| NALP4_HUMAN (Q96MN2) NACHT, LRR and PYD-containing protein 4 (PYRIN-containing APAF1-like protein 4) (PAAD and NACHT-containing protein 2) (PYRIN and NACHT-containing protein 2) (Ribonuclease inhibitor 2) [MASS=113445]                  | *    | 1.21  | *    | *    | * | 1 | 3 | LMMAWS DNKIFR                    | 1 |
| NAP5_HUMAN (O14513) Nck-associated protein 5 (NAP-5) (Fragment) [MASS=44829]                                                                                                                                                                | *    | 4.33  | *    | *    | * | 2 | 1 | VSPKRGVPK                        | 3 |
|                                                                                                                                                                                                                                             |      |       |      |      |   |   | 1 | VSTESFSSR                        | 1 |
| NCA11_HUMAN (P13591) Neural cell adhesion molecule 1, 140 kDa isoform precursor (N-CAM 140) (NCAM-140) (CD56 antigen) [MASS=93360]                                                                                                          | 0.78 | 4.13  | 1.14 | 0.00 | 1 | 2 | 3 | GPVEAKPEC[339]QETETKPAPAEVK      | 1 |
|                                                                                                                                                                                                                                             |      |       |      |      |   |   | 3 | LEGQMGEDGNSIK                    | 1 |
|                                                                                                                                                                                                                                             |      |       |      |      |   |   | 3 | GQGDYSKIEIFQTLPVREPSPPSIHGQPSSGK | 1 |
|                                                                                                                                                                                                                                             |      |       |      |      |   |   | 3 | AVDGFTFTEGDKSPDGR                | 1 |
| NCAM2_HUMAN (O15394) Neural cell adhesion molecule 2 precursor (N-CAM 2) [MASS=92932]                                                                                                                                                       | *    | 11.35 | *    | *    | * | 4 | 2 | LIEENEKYILKGSNTELTVR             | 1 |
|                                                                                                                                                                                                                                             |      |       |      |      |   |   | 3 | GSNTELTVRNIINS DGGPYVC[330]RATNK | 3 |
| NCOR1_HUMAN (O75376) Nuclear receptor corepressor 1 (N-CoR1) (N-CoR) [MASS=270208]                                                                                                                                                          | *    | 0.78  | *    | *    | * | 1 | 3 | QMRQLSVIPPMF DAEQRR              | 1 |
| NDRG2_HUMAN (Q9UN36) Protein NDRG2 (Protein Syld709613) [MASS=40798]                                                                                                                                                                        | *    | 5.66  | *    | *    | * | 1 | 2 | SC[330]FQPLFQFEDM[147]QEIIQNFVR  | 1 |
| NDUA2_HUMAN (O43678) NADH dehydrogenase [ubiquinone] 1 alpha subcomplex subunit 2 (EC 1.6.5.3) (EC 1.6.99.3) (NADH-ubiquinone oxidoreductase B8 subunit) (Complex I-B8) (CI-B8) [MASS=10790]                                                | 0.00 | 6.12  | 1.07 | 0.00 | 1 | 1 | 2 | IHLC[339]QR                      | 1 |

|                                                                                                                                                                                                                                 |      |       |      |      |   |   |   |                               |   |
|---------------------------------------------------------------------------------------------------------------------------------------------------------------------------------------------------------------------------------|------|-------|------|------|---|---|---|-------------------------------|---|
| NDUA5_HUMAN (Q16718) NADH dehydrogenase [ubiquinone] 1 alpha subcomplex subunit 5 (EC 1.6.5.3) (EC 1.6.99.3) (NADH-ubiquinone oxidoreductase 13 kDa-B subunit) (Complex I-13Kd-B) (Complex I subunit B13) [MASS=13327]          | 0.99 | 13.91 | 1.06 | 0.00 | 1 | 1 | 2 | TTGLVGLAVC[339]NTPHER         | 1 |
| NDUA8_HUMAN (P51970) NADH dehydrogenase [ubiquinone] 1 alpha subcomplex subunit 8 (EC 1.6.5.3) (EC 1.6.99.3) (NADH-ubiquinone oxidoreductase 19 kDa subunit) (Complex I-19KD) (CI-19KD) (Complex I-PGIV) (CI-PGIV) [MASS=19974] | 1.00 | 12.87 | 1.43 | 0.02 | 4 | 2 | 2 | AAAHHYGAQC[330]DKPNK          | 1 |
|                                                                                                                                                                                                                                 |      |       |      |      |   |   | 2 | C[330]ALDFFR                  | 1 |
|                                                                                                                                                                                                                                 |      |       |      |      |   |   | 2 | AAAHHYGAQC[339]DKPNK          | 1 |
|                                                                                                                                                                                                                                 |      |       |      |      |   |   | 2 | C[339]ALDFFR                  | 1 |
| NDUAA_HUMAN (O95299) NADH dehydrogenase [ubiquinone] 1 alpha subcomplex subunit 10, mitochondrial precursor (EC 1.6.5.3) (EC 1.6.99.3) (NADH-ubiquinone oxidoreductase 42 kDa subunit) (Complex I-42KD) (CI-42KD) [MASS=40750]  | 1.00 | 3.10  | 1.36 | 0.05 | 4 | 1 | 2 | KQC[339]VDHYNEVK              | 3 |
|                                                                                                                                                                                                                                 |      |       |      |      |   |   | 2 | KQC[330]VDHYNEVK              | 1 |
| NDUB7_HUMAN (P17568) NADH dehydrogenase [ubiquinone] 1 beta subcomplex subunit 7 (EC 1.6.5.3) (EC 1.6.99.3) (NADH-ubiquinone oxidoreductase B18 subunit) (Complex I-B18) (CI-B18) (Cell adhesion protein SQM1) [MASS=16271]     | 1.00 | 6.62  | 1.35 | 0.02 | 4 | 1 | 2 | DYC[330]AHHLIR                | 2 |
|                                                                                                                                                                                                                                 |      |       |      |      |   |   | 2 | DYC[339]AHHLIR                | 2 |
| NDUBA_HUMAN (O96000) NADH dehydrogenase [ubiquinone] 1 beta subcomplex subunit 10 (EC 1.6.5.3) (EC 1.6.99.3) (NADH-ubiquinone oxidoreductase PDSW subunit) (Complex I-PDSW) (CI-PDSW) [MASS=20645]                              | 0.38 | 6.43  | 0.99 | 0.00 | 1 | 1 | 1 | EGQNYQQNC[339]IJK             | 1 |
| NEGR1_HUMAN (Q7Z3B1) Neuronal growth regulator 1 precursor [MASS=38719]                                                                                                                                                         | *    | 3.67  | *    | *    | * | 1 | 2 | TMQVHLTVQVPPK                 | 1 |
| NEIL3_HUMAN (Q8TAT5) Endonuclease VIII-like 3 (Nei-like 3) (DNA glycosylase FPG2) [MASS=67893]                                                                                                                                  | *    | 5.45  | *    | *    | * | 2 | 2 | PHTEVKINR                     | 1 |
|                                                                                                                                                                                                                                 |      |       |      |      |   |   | 2 | LPTRNTIISWTSSRVDHVM[147]DSVAR | 1 |

|                                                                                                                                                                                                                                    |      |      |      |      |   |   |                                                                                                              |                                   |   |
|------------------------------------------------------------------------------------------------------------------------------------------------------------------------------------------------------------------------------------|------|------|------|------|---|---|--------------------------------------------------------------------------------------------------------------|-----------------------------------|---|
| NF2L3_HUMAN (Q9Y4A8) Nuclear factor erythroid 2-related factor 3 (NF-E2-related factor 3) (NFE2-related factor 3) (Nuclear factor, erythroid derived 2, like 3) [MASS=76154]                                                       | 0.00 | 2.74 | 1.44 | 0.00 | 1 | 1 | 2                                                                                                            | KLDIILNLEDDVC[330]NLQAKK          | 1 |
| NGN2_HUMAN (Q9H2A3) Neurogenin 2 [MASS=28621]                                                                                                                                                                                      | *    | 8.46 | *    | *    | * | 1 | 3                                                                                                            | GGVAAGAEGC[339]RPARLLGLVHDC[330]K | 1 |
| NIBA_HUMAN (Q9BZQ8) Niban protein [MASS=103134]                                                                                                                                                                                    | 0.00 | 8.19 | 2.80 | 0.00 | 1 | 3 | 3 SC[339]LESVQPFLASILEELMGPVSSGFSEVRVLFEK<br>3 M[147]GGSASSQLDEGKC[330]AYIR<br>3 TKPPLAPGTILYEELSQFSEDIK     | 1<br>1<br>1                       |   |
| NIT1_HUMAN (Q86X76) Nitrilase homolog 1 (EC 3.5.-.-) [MASS=35896]                                                                                                                                                                  | *    | 5.81 | *    | *    | * | 1 | 3                                                                                                            | RASYGHSMVVDPWGTVVAR               | 1 |
| NMDE1_HUMAN (Q12879) Glutamate [NMDA] receptor subunit epsilon 1 precursor (N-methyl D-aspartate receptor subtype 2A) (NR2A) (NMDAR2A) (hNR2A) [MASS=165281]                                                                       | *    | 0.55 | *    | *    | * | 1 | 1                                                                                                            | MPSIESDV                          | 1 |
| NNTM_HUMAN (Q13423) NAD(P) transhydrogenase, mitochondrial precursor (EC 1.6.1.2) (Pyridine nucleotide transhydrogenase) (Nicotinamide nucleotide transhydrogenase) [MASS=113895]                                                  | 1.00 | 4.24 | 0.85 | 0.17 | 3 | 3 | 2 KTC[339]DALQAK<br>2 EANSIIITPGYGLC[339]AAK<br>2 EANSIIITPGYGLC[330]AAK<br>3 PNTAM[147]LLGDAKKTC[330]DALQAK | 1<br>1<br>1<br>1                  |   |
| NOL8_HUMAN (Q76FK4) Nucleolar protein 8 (Nucleolar protein Nop132) [MASS=131616]                                                                                                                                                   | *    | 2.74 | *    | *    | * | 3 | 2 VSC[339]HDSDDDIMR<br>2 ETTRFFFFSKNDER<br>1 RDDKPK                                                          | 1<br>1<br>1                       |   |
| NP10_HUMAN (P61580) HERV-K_5q33.3 provirus Np9 protein (HERV-K10 Np9 protein) (HERV-K107 Np9 protein) [MASS=8892]                                                                                                                  | 0.00 | 8.00 | 0.31 | 0.00 | 1 | 1 | 2                                                                                                            | LHFVM[147]C[330]                  | 1 |
| NPC1_HUMAN (O15118) Niemann-Pick C1 protein precursor [MASS=142166]                                                                                                                                                                | 0.28 | 1.10 | 2.35 | 0.00 | 1 | 1 | 2                                                                                                            | YNC[339]EYSGPPKPLPK               | 1 |
| NRG2_HUMAN (O14511) Pro-neuregulin-2, membrane-bound isoform precursor (Pro-NRG2) [Contains: Neuregulin-2 (NRG-2) (Neural- and thymus-derived activator for ERBB kinases) (NTAK) (Divergent of neuregulin-1) (DON-1)] [MASS=91678] | *    | 6.00 | *    | *    | * | 3 | 3 DTVRGRLYVNSVSTTLSSWSGHAR<br>3 QNMC[339]PAHQNRSLANGPSHPR<br>1 TSAGPRR                                       | 1<br>1<br>1                       |   |
| NRP1_HUMAN (O14786) Neuropilin-1 precursor (Vascular endothelial cell growth factor 165 receptor) (CD304 antigen) [MASS=103120]                                                                                                    | *    | 0.54 | *    | *    | * | 1 | 1                                                                                                            | YEIFK                             | 1 |

|                                                                                                                                                                                                                                                                              |      |       |      |      |   |   |                  |                                                                                                                        |                  |
|------------------------------------------------------------------------------------------------------------------------------------------------------------------------------------------------------------------------------------------------------------------------------|------|-------|------|------|---|---|------------------|------------------------------------------------------------------------------------------------------------------------|------------------|
| NSD1_HUMAN (Q96L73) Histone-lysine N-methyltransferase, H3 lysine-36 and H4 lysine-20 specific (EC 2.1.1.43) (H3-K36-HMTase) (H4-K20-HMTase) (Nuclear receptor-binding SET domain-containing protein 1) (NR-binding SET domain-containing protein) (Androgen r [MASS=296650] | 0.00 | 2.78  | 0.71 | 0.00 | 1 | 4 | 3<br>2<br>3<br>3 | IIDAGPKGNYARFMNHC[330]C[339]QPNC[330]JETQK<br>QSDPGKISEKGLSFENGK<br>DRIIDAGPKGNYAR<br>EDEC[330]FSC[330]GDAGQLVSC[330]K | 1<br>1<br>1<br>1 |
| NSF_HUMAN (P46459) Vesicle-fusing ATPase (EC 3.6.4.6) (Vesicular-fusion protein NSF) (N-ethylmaleimide sensitive fusion protein) (NEM-sensitive fusion protein) [MASS=82654]                                                                                                 | 1.00 | 1.61  | 1.03 | 0.09 | 3 | 1 | 1<br>2<br>1      | GILLYGPPGC[339]GK<br>GILLYGPPGC[339]GK<br>GILLYGPPGC[330]GK                                                            | 1<br>1<br>1      |
| NTRK1_HUMAN (P04629) High affinity nerve growth factor receptor precursor (EC 2.7.10.1) (Neurotrophic tyrosine kinase receptor type 1) (TRK1 transforming tyrosine kinase protein) (p140-TrkA) (Trk-A) [MASS=87497]                                                          | *    | 1.38  | *    | *    | * | 1 | 2                | NC[339]LVGQGLVVK                                                                                                       | 1                |
| NU160_HUMAN (Q12769) Nuclear pore complex protein Nup160 (Nucleoporin Nup160) (160 kDa nucleoporin) [MASS=149000]                                                                                                                                                            | *    | 1.75  | *    | *    | * | 1 | 3                | LPPYDIPGM[147]VSVVELKQSSVM[147]QR                                                                                      | 1                |
| NU3M_HUMAN (P03897) NADH-ubiquinone oxidoreductase chain 3 (EC 1.6.5.3) (NADH dehydrogenase subunit 3) [MASS=13186]                                                                                                                                                          | 0.97 | 13.04 | 1.93 | 0.00 | 1 | 1 | 2                | STPYEC[339]GFDPM[147]SPAR                                                                                              | 1                |
| NUAK1_HUMAN (O60285) NUA family, SNF1-like kinase 1 (EC 2.7.11.1) (AMPK-related protein kinase 5) [MASS=74305]                                                                                                                                                               | *    | 3.48  | *    | *    | * | 1 | 2<br>2           | KENDFAQSGQDAVPESPSKLSSK<br>VLFLLGADGGC[339]ITR                                                                         | 1<br>3           |
| NUAM_HUMAN (P28331) NADH-ubiquinone oxidoreductase 75 kDa subunit, mitochondrial precursor (EC 1.6.5.3) (EC 1.6.99.3) (Complex I-75Kd) (CI-75Kd) [MASS=79467]                                                                                                                | 1.00 | 7.57  | 1.31 | 0.05 | 7 | 3 | 2<br>3<br>2<br>2 | VLFLLGADGGC[330]ITR<br>DC[339]FIIYQGHHDVVGAPIADVILPGAAYTEK<br>VVAAC[339]AM[147]PVM[147]K<br>VVAAC[330]AM[147]PVM[147]K | 1<br>1<br>1<br>1 |

|                                                                                                                                                                                                   |                                            |       |      |      |   |   |   |                                              |   |
|---------------------------------------------------------------------------------------------------------------------------------------------------------------------------------------------------|--------------------------------------------|-------|------|------|---|---|---|----------------------------------------------|---|
| NUBM_HUMAN (P49821) NADH-ubiquinone oxidoreductase 51 kDa subunit, mitochondrial precursor (EC 1.6.5.3) (EC 1.6.99.3) (Complex I-51KD) (CI-51KD) (NADH dehydrogenase flavoprotein 1) [MASS=50817] | 1.00                                       | 25.43 | 1.79 | 0.14 | 7 | 6 | 2 | LLEGC[339]LVGGR                              | 2 |
|                                                                                                                                                                                                   |                                            |       |      |      |   |   | 2 | NAC[339]GSGYDFDFVVR                          | 1 |
|                                                                                                                                                                                                   |                                            |       |      |      |   |   | 3 | YLVVNADEGEGPTC[339]KDREILR                   | 1 |
|                                                                                                                                                                                                   |                                            |       |      |      |   |   | 3 | LFNISGHVNHPC[339]TVEEEM[147]SVPLK            | 1 |
|                                                                                                                                                                                                   |                                            |       |      |      |   |   | 3 | LIEFYKHESC[339]GQC[339]TPC[339]R             | 1 |
| 3                                                                                                                                                                                                 | LKPPFPADVGVFGC[339]PTTVANVETVAVSPTIC[339]R | 1     |      |      |   |   |   |                                              |   |
| NUHM_HUMAN (P19404) NADH-ubiquinone oxidoreductase 24 kDa subunit, mitochondrial precursor (EC 1.6.5.3) (EC 1.6.99.3) [MASS=27391]                                                                | 0.99                                       | 5.62  | 1.82 | 0.00 | 1 | 1 | 2 | YHIQVC[339]TTTTPC[339]M[147]LR               | 1 |
| NUIM_HUMAN (O00217) NADH-ubiquinone oxidoreductase 23 kDa subunit, mitochondrial precursor (EC 1.6.5.3) (EC 1.6.99.3) (Complex I-23KD) (CI-23KD) (TYKY subunit) [MASS=23705]                      | 0.21                                       | 8.57  | 0.93 | 0.00 | 1 | 1 | 2 | LC[339]EAIC[339]PAQAITIEAEP                  | 1 |
| NUMA1_HUMAN (Q14980) Nuclear mitotic apparatus protein 1 (NuMA protein) (SP-H antigen) [MASS=238273]                                                                                              | *                                          | 3.07  | *    | *    | * | 3 | 2 | SPRIATTTASAATAAAIGATPRAK                     | 1 |
|                                                                                                                                                                                                   |                                            |       |      |      |   |   | 2 | KLLTEKDAQIAM[147]M[147]QQR                   | 1 |
|                                                                                                                                                                                                   |                                            |       |      |      |   |   | 3 | HLTAQVRSLEAQVAHADQQLRDLGK                    | 1 |
| NUMM_HUMAN (O75380) NADH-ubiquinone oxidoreductase 13 kDa-A subunit, mitochondrial precursor (EC 1.6.5.3) (EC 1.6.99.3) (Complex I-13KD-A) (CI-13KD-A) [MASS=13712]                               | 1.00                                       | 34.68 | 1.55 | 0.06 | 3 | 3 | 3 | VSPTGEKVTHTGQVYDDKDYR                        | 1 |
|                                                                                                                                                                                                   |                                            |       |      |      |   |   | 1 | SLPLGAR                                      | 1 |
|                                                                                                                                                                                                   |                                            |       |      |      |   |   | 2 | VIAC[339]DGGGGALGHPK                         | 2 |
| 1                                                                                                                                                                                                 | VIAC[339]DGGGGALGHPK                       | 1     |      |      |   |   |   |                                              |   |
| NUP53_HUMAN (Q8NFH5) Nucleoporin NUP53 (Nuclear pore complex protein Nup53) (Nucleoporin Nup35) (35 kDa nucleoporin) (Mitotic phosphoprotein 44) (MP-44) [MASS=34774]                             | 0.00                                       | 15.34 | 0.24 | 0.00 | 1 | 3 | 2 | TLGTPTQPGSTPRISTM[147]R                      | 1 |
|                                                                                                                                                                                                   |                                            |       |      |      |   |   | 2 | IFGESIM[147]IGVKPC[330]IDK                   | 1 |
|                                                                                                                                                                                                   |                                            |       |      |      |   |   | 2 | KDESLVSKAM[147]EYMFQW                        | 1 |
| O4A15_HUMAN (Q8NGL6) Olfactory receptor 4A15 (Olfactory receptor OR11-118) [MASS=35306]                                                                                                           | *                                          | 5.41  | *    | *    | * | 1 | 3 | YM[147]AIC[339]KPLHELITM[147]NRR             | 1 |
| O51A4_HUMAN (Q8NGJ6) Olfactory receptor 51A4 [MASS=35256]                                                                                                                                         | *                                          | 9.90  | *    | *    | * | 1 | 3 | HVSPLINVLMANVLLLVPPLTNPIVYC[339]VKTK         | 1 |
| O52N2_HUMAN (Q8NGI0) Olfactory receptor 52N2 [MASS=35940]                                                                                                                                         | 0.00                                       | 9.03  | 0.61 | 0.00 | 1 | 1 | 3 | HKAFSTC[330]TSHM[147]C[330]SIVITYVAFFFTFFTHR | 1 |
| O5BF1_HUMAN (Q8NHC7) Olfactory receptor 5BF1 [MASS=34815]                                                                                                                                         | 0.00                                       | 9.62  | 1.63 | 0.00 | 1 | 1 | 3 | NLSILDAC[339]YISVTVPTSC[339]VNSLLDSTTISK     | 1 |

|                                                                                                                                                                                                                                                                                                   |      |       |      |      |   |   |   |                                     |   |
|---------------------------------------------------------------------------------------------------------------------------------------------------------------------------------------------------------------------------------------------------------------------------------------------------|------|-------|------|------|---|---|---|-------------------------------------|---|
| OBSCN_HUMAN (Q5VST9) Obscurin<br>(Obscurin-myosin light chain kinase) (Obscurin-<br>MLCK) (Obscurin-RhoGEF) [MASS=868479]                                                                                                                                                                         | 0.00 | 1.28  | 1.39 | 0.00 | 1 | 7 | 2 | MDQPQFSGAPR                         | 1 |
|                                                                                                                                                                                                                                                                                                   |      |       |      |      |   |   | 3 | DGDRYC[330]LRQDGAMC[339]ELQIR       | 1 |
|                                                                                                                                                                                                                                                                                                   |      |       |      |      |   |   | 3 | FRLAQDGDLYR                         | 1 |
|                                                                                                                                                                                                                                                                                                   |      |       |      |      |   |   | 3 | C[339]ELSKAAPVEWR                   | 1 |
|                                                                                                                                                                                                                                                                                                   |      |       |      |      |   |   | 2 | DLGDPSMDKAAVK                       | 1 |
|                                                                                                                                                                                                                                                                                                   |      |       |      |      |   |   | 2 | RVLLVRDVAR                          | 1 |
| OCRL_HUMAN (Q01968) Inositol<br>polyphosphate 5-phosphatase OCRL-1 (EC<br>3.1.3.36) (Lowe oculocerebrorenal syndrome<br>protein) [MASS=104204]                                                                                                                                                    | 0.00 | 1.78  | 1.44 | 0.00 | 1 | 2 | 2 | C[339]LDSAYDPR                      | 1 |
|                                                                                                                                                                                                                                                                                                   |      |       |      |      |   |   | 1 | VTNTMRK                             | 1 |
|                                                                                                                                                                                                                                                                                                   |      |       |      |      |   |   |   |                                     |   |
| ODB2_HUMAN (P11182) Lipoamide<br>acyltransferase component of branched-chain<br>alpha-keto acid dehydrogenase complex,<br>mitochondrial precursor (EC 2.3.1.168)<br>(Dihydrolipoyllysine-residue (2-<br>methylpropanoyl)transferase) (E2)<br>(Dihydrolipoamide branched chain tra<br>[MASS=53487] | *    | 3.11  | *    | *    | * | 1 | 2 | DGRILKEDILNYLEK                     | 1 |
|                                                                                                                                                                                                                                                                                                   |      |       |      |      |   |   |   |                                     |   |
| ODP2_HUMAN (P10515) Dihydrolipoyllysine-<br>residue acetyltransferase component of<br>pyruvate dehydrogenase complex,<br>mitochondrial precursor (EC 2.3.1.12)<br>(Pyruvate dehydrogenase complex E2 subunit)<br>(PDCE2) (E2) (Dihydrolipoamide S-<br>acetyltransferase component [MASS=65781]    | 0.66 | 4.89  | 1.16 | 0.00 | 1 | 1 | 3 | NFSAIINPPQAC[339]ILAIGASEDKLVPADNEK | 1 |
|                                                                                                                                                                                                                                                                                                   |      |       |      |      |   |   |   |                                     |   |
| ODPA_HUMAN (P08559) Pyruvate<br>dehydrogenase E1 component alpha subunit,<br>somatic form, mitochondrial precursor (EC<br>1.2.4.1) (PDHE1-A type I) [MASS=43295]                                                                                                                                  | 0.99 | 2.82  | 0.88 | 0.00 | 1 | 1 | 2 | LPC[339]IFIC[339]ENNR               | 1 |
|                                                                                                                                                                                                                                                                                                   |      |       |      |      |   |   |   |                                     |   |
| ODPB_HUMAN (P11177) Pyruvate<br>dehydrogenase E1 component subunit beta,<br>mitochondrial precursor (EC 1.2.4.1) (PDHE1-<br>B) [MASS=39219]                                                                                                                                                       | 1.00 | 11.14 | 0.68 | 0.06 | 2 | 2 | 3 | QGTHITVVSHSRPVGHC[330]LEAAAVLSK     | 1 |
|                                                                                                                                                                                                                                                                                                   |      |       |      |      |   |   | 2 | PVGHC[330]LEAAAVLSK                 | 1 |
|                                                                                                                                                                                                                                                                                                   |      |       |      |      |   |   | 2 | PVGHC[339]LEAAAVLSK                 | 1 |



|                                                                                                                                                                                                                                                                             |      |       |       |      |   |   |   |                                            |   |
|-----------------------------------------------------------------------------------------------------------------------------------------------------------------------------------------------------------------------------------------------------------------------------|------|-------|-------|------|---|---|---|--------------------------------------------|---|
| ODPX_HUMAN (O00330) Pyruvate dehydrogenase protein X component, mitochondrial precursor (Dihydrolipoamide dehydrogenase-binding protein of pyruvate dehydrogenase complex) (Lipoyl-containing pyruvate dehydrogenase complex component X) (E3-binding protein) [MASS=54122] | 0.87 | 12.18 | 1.21  | 0.00 | 1 | 3 | 2 | STVPHAYATADC[339]DLGAVLK                   | 1 |
|                                                                                                                                                                                                                                                                             |      |       |       |      |   |   | 3 | PSPEPQISIPVKKEHIPGTLR                      | 1 |
|                                                                                                                                                                                                                                                                             |      |       |       |      |   |   | 3 | QLITVTMSSDSRVVDEDELATR                     | 1 |
| OPA1_HUMAN (O60313) Dynamin-like 120 kDa protein, mitochondrial precursor (Optic atrophy 1 gene protein) [MASS=111657]                                                                                                                                                      | 1.00 | 6.04  | 1.22  | 0.00 | 2 | 3 | 2 | TALNHC[339]NLC[339]R                       | 1 |
|                                                                                                                                                                                                                                                                             |      |       |       |      |   |   | 3 | M[147]LAITANTLRQQLTNTVEVRR                 | 1 |
|                                                                                                                                                                                                                                                                             |      |       |       |      |   |   | 3 | GPGLQRM[147]VLVDLPGVINTVTSGMAPDTK          | 1 |
|                                                                                                                                                                                                                                                                             |      |       |       |      |   |   | 2 | TALNHC[330]NLC[330]R                       | 1 |
| OPTN_HUMAN (Q96CV9) Optineurin (Optic neuropathy-inducing protein) (E3-14.7K-interacting protein) (FIP-2) (Huntingtin-interacting protein HYPL) (NEMO-related protein) (Transcription factor IIIA-interacting protein) (TFIIIA-IntP) [MASS=65922]                           | *    | 2.43  | *     | *    | * | 1 | 2 | ELLTENHQLKEAMK                             | 1 |
| OR8D2_HUMAN (Q9GZM6) Olfactory receptor 8D2 (Olfactory receptor-like protein JCG2) [MASS=34857]                                                                                                                                                                             | 0.00 | 12.86 | 35.73 | 0.00 | 1 | 2 | 3 | VC[330]SIMM[147]AVVYSLGFLWATVHTTR          | 1 |
|                                                                                                                                                                                                                                                                             |      |       |       |      |   |   | 2 | YVAIC[339]RPLLYNIVM[147]SHR                | 1 |
| ORC1_HUMAN (Q13415) Origin recognition complex subunit 1 (Replication control protein 1) [MASS=97349]                                                                                                                                                                       | 0.00 | 5.69  | 0.14  | 0.00 | 1 | 2 | 3 | MEGLPYPTMSETMAVC[330]SHLGSC[330]RLLLVPEPSR | 1 |
|                                                                                                                                                                                                                                                                             |      |       |       |      |   |   | 2 | NSSVLEQSFRLAIAEFR                          | 1 |
| OX1R_HUMAN (O43613) Orexin receptor type 1 (Ox1r) (Hypocretin receptor type 1) [MASS=47522]                                                                                                                                                                                 | 0.00 | 11.06 | 0.48  | 0.00 | 1 | 2 | 3 | SLSLQSRC[330]SISKISEHVVLTSVTTVLP           | 1 |
|                                                                                                                                                                                                                                                                             |      |       |       |      |   |   | 2 | C[339]SISKISEHVVLTSVTTVLP                  | 1 |
| OXDD_HUMAN (Q99489) D-aspartate oxidase (EC 1.4.3.1) (DASOX) (DDO) [MASS=37535]                                                                                                                                                                                             | 0.00 | 5.57  | 1.14  | 0.00 | 1 | 1 | 2 | IAVVGAGVVGLSTAVC[330]ISK                   | 1 |
| OXR_P_HUMAN (Q9Y4L1) 150 kDa oxygen-regulated protein precursor (Orp150) (Hypoxia up-regulated 1) [MASS=111335]                                                                                                                                                             | *    | 1.20  | *     | *    | * | 1 | 2 | AVLQAARM[147]AGLK                          | 1 |
| P3H2_HUMAN (Q8IVL5) Prolyl 3-hydroxylase 2 precursor (EC 1.14.11.7) (Leprecan-like protein 1) (Myxoid liposarcoma-associated protein 4) [MASS=80984]                                                                                                                        | *    | 5.65  | *     | *    | * | 2 | 1 | FEGATVLK                                   | 1 |
|                                                                                                                                                                                                                                                                             |      |       |       |      |   |   | 3 | DYSALLYMNDDFEGGEFIFTEMDAKVTASIK            | 1 |
| PANK4_HUMAN (Q9NVE7) Pantothenate kinase 4 (EC 2.7.1.33) (Pantothenic acid kinase 4) (hPanK4) [MASS=85990]                                                                                                                                                                  | 0.00 | 2.46  | 1.40  | 0.00 | 1 | 1 | 3 | SLLHMISNDIGQLAC[339]LHAR                   | 1 |

|                                                                                                                                                                                                  |      |       |      |      |   |   |   |                                |   |
|--------------------------------------------------------------------------------------------------------------------------------------------------------------------------------------------------|------|-------|------|------|---|---|---|--------------------------------|---|
| PARK7_HUMAN (Q99497) Protein DJ-1<br>(Oncogene DJ1) [MASS=19891]                                                                                                                                 | 1.00 | 28.57 | 1.09 | 0.08 | 4 | 3 | 2 | VTVAGLAGKDPVQC[339]SR          | 1 |
|                                                                                                                                                                                                  |      |       |      |      |   |   | 2 | GLIAAIC[339]AGPTALLAHEIGFGSK   | 1 |
|                                                                                                                                                                                                  |      |       |      |      |   |   | 2 | GLIAAIC[330]AGPTALLAHEIGFGSK   | 1 |
|                                                                                                                                                                                                  |      |       |      |      |   |   | 2 | DVVIC[330]PDASLEDAKK           | 1 |
| PAX1_HUMAN (P15863) Paired box protein<br>Pax-1 (HUP48) [MASS=46295]                                                                                                                             | 0.00 | 3.64  | *    | *    | * | 1 | 2 | IVELAQLGIRPC[339]DISR          | 1 |
| PAX9_HUMAN (P55771) Paired box protein<br>Pax-9 [MASS=36310]                                                                                                                                     | 0.00 | 3.81  | 1.88 | 0.00 | 1 | 1 | 2 | PRVTTPTVVKHIR                  | 1 |
| PCD15_HUMAN (Q96QU1) Protocadherin-15<br>precursor [MASS=216027]                                                                                                                                 | *    | 0.66  | *    | *    | * | 1 | 1 | QIYKGM[147]VAPDAVK             | 1 |
| PCOC2_HUMAN (Q9UKZ9) Procollagen C-<br>endopeptidase enhancer 2 precursor<br>(Procollagen COOH-terminal proteinase<br>enhancer 2) (Procollagen C-proteinase<br>enhancer 2) (PCPE-2) [MASS=45716] | *    | 3.13  | *    | *    | * | 1 | 2 | IMPNSFIMM[147]FKTK             | 1 |
| PDIA5_HUMAN (Q14554) Protein disulfide-<br>isomerase A5 precursor (EC 5.3.4.1) (Protein<br>disulfide isomerase-related protein)<br>[MASS=59594]                                                  | 0.00 | 3.85  | 0.04 | 0.00 | 1 | 2 | 2 | LLSTVAQAVK                     | 1 |
|                                                                                                                                                                                                  |      |       |      |      |   |   | 2 | GFPTIC[330]YFEK                | 1 |
| PDK2_HUMAN (Q15119) [Pyruvate<br>dehydrogenase [lipoamide]] kinase isozyme 2,<br>mitochondrial precursor (EC 2.7.11.2)<br>(Pyruvate dehydrogenase kinase isoform 2)<br>[MASS=46154]              | *    | 6.14  | *    | *    | * | 1 | 3 | HYQTIQEAGDWC[330]VPSTEPKNTSTYR | 1 |
|                                                                                                                                                                                                  |      |       |      |      |   |   | 3 | IQM[147]VSSSQKKGVTVPHPSPQPK    | 1 |
|                                                                                                                                                                                                  |      |       |      |      |   |   | 1 | TPGPKDR                        | 1 |
|                                                                                                                                                                                                  |      |       |      |      |   |   | 1 | DGWSPPRSR                      | 1 |
| PDZK3_HUMAN (O15018) PDZ domain-<br>containing protein 3 (PDZ domain-containing<br>protein 2) (Activated in prostate cancer protein)<br>[MASS=301609]                                            | *    | 2.50  | *    | *    | * | 7 | 1 | SFSMAK                         | 1 |
|                                                                                                                                                                                                  |      |       |      |      |   |   | 2 | HNQGTHLR                       | 1 |
|                                                                                                                                                                                                  |      |       |      |      |   |   | 1 | EPGKPR                         | 7 |
|                                                                                                                                                                                                  |      |       |      |      |   |   | 3 | GGNRAC[330]PGGSGPK             | 1 |
|                                                                                                                                                                                                  |      |       |      |      |   |   |   |                                |   |

|                                                                                                                                                                                                                                                               |      |       |      |      |   |   |   |                                            |   |
|---------------------------------------------------------------------------------------------------------------------------------------------------------------------------------------------------------------------------------------------------------------|------|-------|------|------|---|---|---|--------------------------------------------|---|
| PEBP1_HUMAN (P30086)<br>Phosphatidylethanolamine-binding protein 1 (PEBP-1) (Prostatic-binding protein) (HCNPpp) (Neuropolypeptide h3) (Raf kinase inhibitor protein) (RKIP) [Contains: Hippocampal cholinergic neurostimulating peptide (HCNP)] [MASS=20925] | 0.95 | 11.83 | 0.87 | 0.00 | 1 | 1 | 3 | YVWLVYEQRPLKC[339]DEPILSNR                 | 1 |
| PHAR1_HUMAN (Q9C0D0) Phosphatase and actin regulator 1 [MASS=66308]                                                                                                                                                                                           | *    | 6.72  | *    | *    | * | 2 | 2 | ISFNLGAAEEVERLAAMR                         | 1 |
|                                                                                                                                                                                                                                                               |      |       |      |      |   |   | 2 | VMIC[339]MPVGGPDLVSYTAQK                   | 1 |
| PEX_HUMAN (P78562) Phosphate-regulating neutral endopeptidase (EC 3.4.24.-) (Metalloendopeptidase homolog PEX) (X-linked hypophosphatemia protein) (HYP) (Vitamin D-resistant hypophosphatemic rickets protein) [MASS=86473]                                  | 0.53 | 5.74  | 0.88 | 0.00 | 1 | 2 | 2 | C[330]M[147]INQYSNYYWKK                    | 1 |
|                                                                                                                                                                                                                                                               |      |       |      |      |   |   | 3 | ASNEHILKLDQATLSLAVREDYLDNSTEAK             | 1 |
| PHF8_HUMAN (Q9UPP1) PHD finger protein 8 [MASS=117863]                                                                                                                                                                                                        | 0.00 | 4.81  | *    | *    | * | 3 | 3 | VDKARLMAEQVMEDEFDLDSDDELQIDER              | 1 |
|                                                                                                                                                                                                                                                               |      |       |      |      |   |   | 2 | KKNSDDAPWSPK                               | 1 |
|                                                                                                                                                                                                                                                               |      |       |      |      |   |   | 2 | LSLPSKNGSK                                 | 1 |
| PHLD1_HUMAN (P80108) Phosphatidylinositol-glycan-specific phospholipase D 1 precursor (EC 3.1.4.50) (PI-G PLD) (Glycoprotein phospholipase D) (Glycosyl-phosphatidylinositol-specific phospholipase D) [MASS=92374]                                           | *    | 4.17  | *    | *    | * | 1 | 3 | LGWAMTSADLNQDGHGDLVVGAPGYSRPGHIHIGR        | 1 |
| PI51C_HUMAN (O60331) Phosphatidylinositol-4-phosphate 5-kinase type-1 gamma (EC 2.7.1.68) (Phosphatidylinositol-4-phosphate 5-kinase type I gamma) (PtdIns(4)P-5-kinase gamma) (PtdInsPKIgamma) (PIP5KIgamma) [MASS=73259]                                    | 0.00 | 4.04  | 0.86 | 0.00 | 1 | 2 | 2 | GERLLLHIGIIDILQSYR                         | 2 |
|                                                                                                                                                                                                                                                               |      |       |      |      |   |   | 2 | DC[330]LVLESFK                             | 1 |
| PK1L1_HUMAN (Q8TDX9) Polycystic kidney disease 1-like 1 protein (Polycystin-1L1) [MASS=315433]                                                                                                                                                                | 0.00 | 1.90  | 0.43 | 0.00 | 1 | 3 | 1 | KPPNR                                      | 1 |
|                                                                                                                                                                                                                                                               |      |       |      |      |   |   | 3 | AM[147]AC[330]YFGILLIVSATLC[330]FGM[147]LR | 1 |
|                                                                                                                                                                                                                                                               |      |       |      |      |   |   | 3 | AQAPVSVISEGTHLFFSRTTSSPIVLR                | 1 |

|                                                                                                                                                                                                                                |      |       |      |      |   |   |   |                                       |   |
|--------------------------------------------------------------------------------------------------------------------------------------------------------------------------------------------------------------------------------|------|-------|------|------|---|---|---|---------------------------------------|---|
| PK3CG_HUMAN (P48736) Phosphatidylinositol-4,5-bisphosphate 3-kinase catalytic subunit gamma isoform (EC 2.7.1.153) (PI3-kinase p110 subunit gamma) (PtdIns-3-kinase subunit p110) (PI3K) (PI3Kgamma) (p120-PI3K) [MASS=126453] | 0.32 | 2.36  | 0.41 | 0.00 | 1 | 2 | 2 | KIANNNC[330]IFIVIHR                   | 1 |
|                                                                                                                                                                                                                                |      |       |      |      |   |   | 3 | DALTVGKNEEDAK                         | 1 |
| PLCG2_HUMAN (P16885) 1-phosphatidylinositol-4,5-bisphosphate phosphodiesterase gamma 2 (EC 3.1.4.11) (Phosphoinositide phospholipase C) (PLC-gamma-2) (Phospholipase C-gamma-2) (PLC-IV) [MASS=147936]                         | *    | 1.03  | *    | *    | * | 1 | 3 | PDASAVYLRDFQR                         | 2 |
| PLRG1_HUMAN (O43660) Pleiotropic regulator 1 [MASS=57193]                                                                                                                                                                      | 0.00 | 5.25  | 0.59 | 0.00 | 1 | 1 | 3 | VHAAVQPGSLDSESGIFAC[330]AFDQSESR      | 1 |
| PLXA2_HUMAN (O75051) Plexin-A2 precursor (Semaphorin receptor OCT) [MASS=212654]                                                                                                                                               | *    | 2.15  | *    | *    | * | 3 | 3 | LTGNLTIQVAHKTGPEEDNK                  | 1 |
|                                                                                                                                                                                                                                |      |       |      |      |   |   | 2 | DM[147]AFSIDQR                        | 1 |
|                                                                                                                                                                                                                                |      |       |      |      |   |   | 2 | VEQLINAMSIES                          | 1 |
| PLXA3_HUMAN (P51805) Plexin-A3 precursor (Plexin-4) (Semaphorin receptor SEX) [MASS=207664]                                                                                                                                    | *    | 0.32  | *    | *    | * | 1 | 2 | HTC[339]TSR                           | 1 |
| PLXB2_HUMAN (O15031) Plexin-B2 precursor (MM1) [MASS=205098]                                                                                                                                                                   | *    | 2.67  | *    | *    | * | 2 | 2 | NLDTVKGSSSLHVGSDLLK                   | 1 |
|                                                                                                                                                                                                                                |      |       |      |      |   |   | 3 | SFVASNDEGVATVGLVSSTGPGGDRVLFVGK       | 1 |
| PLXD1_HUMAN (Q9Y4D7) Plexin-D1 precursor [MASS=212094]                                                                                                                                                                         | *    | 0.47  | *    | *    | * | 1 | 1 | GNISAVAVR                             | 1 |
| PO3F2_HUMAN (P20265) POU domain, class 3, transcription factor 2 (Nervous system-specific octamer-binding transcription factor N-Oct-3) (Brain-specific homeobox/POU domain protein 2) (Brain-2) (Protein Brn-2) [MASS=46892]  | *    | 2.26  | *    | *    | * | 1 | 2 | PSVVVQQGGR                            | 3 |
| PPIA_HUMAN (P62937) Peptidyl-prolyl cis-trans isomerase A (EC 5.2.1.8) (PPlase A) (Rotamase A) (Cyclophilin A) (Cyclosporin A-binding protein) [MASS=17881]                                                                    | 1.00 | 25.00 | 1.52 | 0.15 | 4 | 2 | 3 | HTGPGILSM[147]ANAGPNTNGSQFFIC[330]TAK | 1 |
|                                                                                                                                                                                                                                |      |       |      |      |   |   | 2 | IIPGFM[147]C[339]QGGDFTR              | 1 |
|                                                                                                                                                                                                                                |      |       |      |      |   |   | 2 | IIPGFM[147]C[330]QGGDFTR              | 1 |
|                                                                                                                                                                                                                                |      |       |      |      |   |   | 2 | IIPGFMC[330]QGGDFTR                   | 1 |
| PPWD1_HUMAN (Q96BP3) Peptidylprolyl isomerase domain and WD repeat-containing protein 1 (EC 5.2.1.8) [MASS=73574]                                                                                                              | 0.00 | 4.18  | 1.82 | 0.00 | 1 | 2 | 2 | LM[147]RVFDESLSMFTELQQMR              | 1 |
|                                                                                                                                                                                                                                |      |       |      |      |   |   | 2 | LFPVEC[339]PK                         | 1 |

|                                                                                                                                                                                                                                                                              |      |       |      |      |   |   |   |                                                                                                   |             |
|------------------------------------------------------------------------------------------------------------------------------------------------------------------------------------------------------------------------------------------------------------------------------|------|-------|------|------|---|---|---|---------------------------------------------------------------------------------------------------|-------------|
| PRAM5_HUMAN (Q5TYX0) PRAME family member 5 [MASS=54860]                                                                                                                                                                                                                      | 0.00 | 6.72  | 0.24 | 0.00 | 1 | 2 | 3 | MPC[339]LEAFQAVLDGLDALLTQGVHPR<br>2 PVQDC[339]PR                                                  | 1<br>1      |
| PRD15_HUMAN (P57071) PR domain zinc finger protein 15 (PR domain-containing protein 15) (Zinc finger protein 298) [MASS=169203]                                                                                                                                              | 0.00 | 4.25  | 0.44 | 0.00 | 1 | 3 | 3 | MDKPMMLKQAGSGVHAAGTPENSAPVESEPSQWAC[330]K<br>1 DIALM[147]DDHQR<br>3 EHMRVHDNVREYLC[330]AEC[330]GK | 1<br>1<br>1 |
| PRD16_HUMAN (Q9HAZ2) PR domain zinc finger protein 16 (PR domain-containing protein 16) (Transcription factor MEL1) [MASS=140261]                                                                                                                                            | 0.00 | 3.45  | 0.83 | 0.00 | 1 | 2 | 3 | YSLEQHMVIHTEEREYK[330]DQC[330]PK<br>2 RC[330]AEDHEGGLLALEPM[147]PTFGK                             | 1<br>1      |
| PRDX5_HUMAN (P30044) Peroxiredoxin-5, mitochondrial precursor (EC 1.11.1.15) (Prx-V) (Peroxisomal antioxidant enzyme) (PLP) (Thioredoxin reductase) (Thioredoxin peroxidase PMP20) (Antioxidant enzyme B166) (AOEB166) (TPx type VI) (Liver tissue 2D-page spo) [MASS=22026] | 1.00 | 17.29 | 0.86 | 0.02 | 2 | 2 | 2 | GVLFVPGAFTPGC[339]SK<br>2 GVLFVPGAFTPGC[330]SK<br>3 GVQVVAC[330]LSVNDAFVTGEWGR                    | 1<br>1<br>1 |
| PRIC1_HUMAN (Q96MT3) Prickle-like protein 1 (REST/NRSF-interacting LIM domain protein 1) [MASS=94300]                                                                                                                                                                        | *    | 3.73  | *    | *    | * | 2 | 3 | SLFQPQPNE[147]DIRASEHWISDNM[147]VK<br>1 ILPEEK                                                    | 1<br>1      |
| PROD_HUMAN (O43272) Proline oxidase, mitochondrial precursor (EC 1.5.3.-) (Proline dehydrogenase) [MASS=59216]                                                                                                                                                               | 0.00 | 6.20  | 0.75 | 0.00 | 1 | 2 | 2 | FNVEKPLIFNTYQC[330]YLK<br>2 ALENSMLMKGTHRER                                                       | 1<br>1      |
| PSL1_HUMAN (Q8TCT7) Signal peptide peptidase-like 2B (EC 3.4.23.-) (Protein SPP-like 2B) (Protein SPPL2b) (Intramembrane protease 4) (IMP4) (Presenilin-like protein 1) [MASS=64643]                                                                                         | 0.00 | 3.21  | 2.12 | 0.00 | 1 | 1 | 2 | M[147]LLLALFC[339]VAVSVVWGVFR                                                                     | 1           |
| PUR4_HUMAN (O15067) Phosphoribosylformylglycinamide synthase (EC 6.3.5.3) (FGAM synthase) (FGAMS) (Formylglycinamide ribotide amidotransferase) (FGARAT) (Formylglycinamide ribotide synthetase) [MASS=144663]                                                               | *    | 0.97  | *    | *    | * | 1 | 3 | RIVLVDDREC[330]PVR                                                                                | 3           |
| PX11C_HUMAN (Q96HA9) Peroxisomal membrane protein 11C (Peroxin-11C) (Peroxisomal biogenesis factor 11C) (PEX11gamma) (Pex11pgamma) [MASS=26636]                                                                                                                              | *    | 4.98  | *    | *    | * | 1 | 3 | LLVSTQLSHC[339]JR                                                                                 | 1           |

|                                                                                                                                                                                                             |      |      |      |      |   |   |   |                              |   |
|-------------------------------------------------------------------------------------------------------------------------------------------------------------------------------------------------------------|------|------|------|------|---|---|---|------------------------------|---|
| PYC_HUMAN (P11498) Pyruvate carboxylase, mitochondrial precursor (EC 6.4.1.1) (Pyruvic carboxylase) (PCB) [MASS=129633]                                                                                     | 0.94 | 5.94 | 1.17 | 0.00 | 1 | 4 | 2 | VIAHGKDHPTAATKM[147]SR       | 1 |
|                                                                                                                                                                                                             |      |      |      |      |   |   | 1 | AGTHILC[339]IK               | 1 |
|                                                                                                                                                                                                             |      |      |      |      |   |   | 3 | IVGDLAQFM[147]VQNGLSR        | 1 |
|                                                                                                                                                                                                             |      |      |      |      |   |   | 3 | PAQNRAQKLLHYLGHVMVNGPTTPIPVK | 1 |
| QOR_HUMAN (Q08257) Quinone oxidoreductase (EC 1.6.5.5) (NADPH:quinone reductase) (Zeta-crystallin) [MASS=35206]                                                                                             | 0.97 | 2.74 | 1.00 | 0.00 | 1 | 1 | 1 | ALIHSAC[339]VK               | 1 |
| RBBP8_HUMAN (Q99708) Retinoblastoma-binding protein 8 (RBBP-8) (CtBP-interacting protein) (CtIP) (Retinoblastoma-interacting protein and myosin-like) (RIM) [MASS=101967]                                   | 0.00 | 2.34 | 2.01 | 0.00 | 1 | 2 | 2 | KLLGHTC[339]JK               | 1 |
|                                                                                                                                                                                                             |      |      |      |      |   |   | 2 | EENAVFKIPLRPR                | 1 |
| RBCC1_HUMAN (Q8TDY2) RB1-inducible coiled-coil protein 1 [MASS=183060]                                                                                                                                      | *    | 0.63 | *    | *    | * | 1 | 1 | PGEGASGASR                   | 1 |
| RBP22_HUMAN (Q53T03) Ran-binding protein 2-like 2 (RanBP2L2) [MASS=198922]                                                                                                                                  | 0.00 | 2.55 | 1.17 | 0.00 | 1 | 3 | 3 | SM[147]KGFYFAKLYYEAK         | 1 |
|                                                                                                                                                                                                             |      |      |      |      |   |   | 2 | EYLESQC[330]LES DK           | 1 |
|                                                                                                                                                                                                             |      |      |      |      |   |   | 2 | KC[330]ELSKNSDIEQSSDSK       | 1 |
| RBP26_HUMAN (Q68DN6) Ran-binding protein 2-like 6 (RanBP2L6) [MASS=196685]                                                                                                                                  | 0.00 | 2.86 | *    | *    | * | 3 | 2 | GFSGAGEKLFSSQC[339]GK        | 1 |
|                                                                                                                                                                                                             |      |      |      |      |   |   | 3 | SLELNPPQKDLVLKIAELLC[330]K   | 1 |
|                                                                                                                                                                                                             |      |      |      |      |   |   | 3 | FDESTTGFNF SFK               | 1 |
| RDH1_HUMAN (Q92781) 11-cis retinol dehydrogenase (EC 1.1.1.105) (11-cis RDH) [MASS=34979]                                                                                                                   | *    | 6.60 | *    | *    | * | 1 | 3 | M[147]WLP LLLGALLWAVLWLLRDR  | 1 |
| RECK_HUMAN (O95980) Reversion-inducing cysteine-rich protein with Kazal motifs precursor (hRECK) (Suppressor of tumorigenicity 15) (ST15) [MASS=106457]                                                     | *    | 5.97 | *    | *    | * | 4 | 3 | DVC[339]EQIFSSKSESRLK        | 1 |
|                                                                                                                                                                                                             |      |      |      |      |   |   | 2 | VTNKKPITVLEILQK              | 1 |
|                                                                                                                                                                                                             |      |      |      |      |   |   | 3 | GSIKMPFINIPVLDIK             | 1 |
|                                                                                                                                                                                                             |      |      |      |      |   |   | 2 | AEDHAC[339]QNAC[330]K        | 1 |
| RED2_HUMAN (Q9NS39) Double-stranded RNA-specific editase B2 (EC 3.5.-.-) (dsRNA adenosine deaminase B2) (RNA-dependent adenosine deaminase 3) (RNA-editing deaminase 2) (RNA-editing enzyme 2) [MASS=80621] | *    | 1.08 | *    | *    | * | 1 | 1 | GGAPGAKR                     | 2 |
| REXO1_HUMAN (Q8N1G1) RNA exonuclease 1 homolog (EC 3.1.-.-) (Elongin A-binding protein 1) (EloA-BP1) (Transcription elongation factor B polypeptide 3-binding protein 1) [MASS=131529]                      | *    | 0.57 | *    | *    | * | 1 | 2 | PKDSSC[339]R                 | 1 |

|                                                                                                                                                                                                                                                                             |      |       |       |      |   |   |                                                                                            |                      |   |
|-----------------------------------------------------------------------------------------------------------------------------------------------------------------------------------------------------------------------------------------------------------------------------|------|-------|-------|------|---|---|--------------------------------------------------------------------------------------------|----------------------|---|
| RFC4_HUMAN (P35249) Replication factor C subunit 4 (Replication factor C 37 kDa subunit) (RF-C 37 kDa subunit) (RFC37) (Activator 1 37 kDa subunit) (A1 37 kDa subunit) [MASS=39681]                                                                                        | *    | 5.51  | *     | *    | * | 1 | 3                                                                                          | IVILDEADSMTSAAQAALRR | 1 |
| RGS19_HUMAN (P49795) Regulator of G-protein signaling 19 (RGS19) (G-alpha-interacting protein) (GAIP protein) [MASS=24636]                                                                                                                                                  | *    | 17.51 | *     | *    | * | 2 | 2 LMHSPAGRSVFR<br>3 SVFRAFLRTEYSEENMLFWLAC[330]EELK                                        | 1<br>1               |   |
| RHOA_HUMAN (P61586) Transforming protein RhoA precursor (H12) [MASS=21768]                                                                                                                                                                                                  | 0.99 | 7.25  | 1.17  | 0.00 | 1 | 1 | 2 HFC[339]PNVPIILVGNK                                                                      | 1                    |   |
| RHOB_HUMAN (P62745) Rho-related GTP-binding protein RhoB precursor (H6) [MASS=22123]                                                                                                                                                                                        | 1.00 | 7.14  | 1.03  | 0.00 | 2 | 1 | 2 HFC[339]PNVPIILVANK<br>2 HFC[330]PNVPIILVANK                                             | 1<br>1               |   |
| RIB1_HUMAN (P04843) Dolichyl-diphosphooligosaccharide--protein glycosyltransferase 67 kDa subunit precursor (EC 2.4.1.119) (Ribophorin I) (RPN-I) [MASS=68569]                                                                                                              | *    | 2.80  | *     | *    | * | 1 | 2 VSEM[147]QKLDQVKELVLK                                                                    | 1                    |   |
| RIMB1_HUMAN (O95153) Peripheral-type benzodiazepine receptor-associated protein 1 (PRAX-1) (Peripheral benzodiazepine receptor-interacting protein) (PBR-IP) (RIM-binding protein 1) (RIM-BP1) [MASS=200149]                                                                | *    | 2.21  | *     | *    | * | 3 | 3 C[339]AILKEENQM[147]LR<br>1 GPQKRGVR<br>2 PEDEEVEAFLKAKLNMSFGDR                          | 1<br>1<br>1          |   |
| RIOK1_HUMAN (Q9BRS2) Serine/threonine-protein kinase RIO1 (EC 2.7.11.1) (RIO kinase 1) [MASS=65583]                                                                                                                                                                         | *    | 5.46  | *     | *    | * | 1 | 3 DM[147]DIIMKLKEEDM[147]AMNAQQDNILYQTVTGLK                                                | 1                    |   |
| RIPK2_HUMAN (O43353) Receptor-interacting serine/threonine-protein kinase 2 (EC 2.7.11.1) (RIP-like-interacting CLARP kinase) (Receptor-interacting protein 2) (RIP-2) (CARD-containing interleukin-1 beta-converting enzyme-associated kinase) (CARD-containi [MASS=61195] | 0.00 | 3.15  | 16.67 | 0.00 | 1 | 1 | 2 MNGEAIC[339]SALPTIPYHK                                                                   | 1                    |   |
| RIPK5_HUMAN (Q6XUX3) Receptor-interacting serine/threonine-protein kinase 5 (EC 2.7.11.1) (Dusty protein kinase) (Dusty PK) (RIP-homologous kinase) [MASS=105258]                                                                                                           | 0.00 | 6.46  | 0.69  | 0.00 | 1 | 3 | 3 DVIVPENGEVPGTREIKC[339]C[330]JIR<br>3 GPAGDVAETGLQAGQLSC[330]ISFPPK<br>3 DLYTGLKAGLTLETR | 1<br>1<br>1          |   |

|                                                                                                                                                                                                                                |      |       |      |      |   |   |   |                                                |   |
|--------------------------------------------------------------------------------------------------------------------------------------------------------------------------------------------------------------------------------|------|-------|------|------|---|---|---|------------------------------------------------|---|
| RIR2B_HUMAN (Q7LG56) Ribonucleoside-diphosphate reductase M2 subunit B (EC 1.17.4.1) (TP53-inducible ribonucleotide reductase M2 B) (p53-inducible ribonucleotide reductase small subunit 2-like protein) (p53R2) [MASS=40736] | 0.00 | 6.55  | 0.48 | 0.00 | 1 | 1 | 3 | IEQEFLTEALPVGLIGM[147]NC[330]ILMK              | 1 |
| RL10A_HUMAN (P62906) 60S ribosomal protein L10a (CSA-19) [MASS=24700]                                                                                                                                                          | *    | 2.78  | *    | *    | * | 1 | 1 | NWQNVNR                                        | 1 |
| RL12_HUMAN (P30050) 60S ribosomal protein L12 [MASS=17818]                                                                                                                                                                     | 0.99 | 11.52 | 1.49 | 0.00 | 1 | 1 | 2 | HPHDIIDDINSGAVEC[339]PAS                       | 1 |
| RNBP6_HUMAN (O60518) Ran-binding protein 6 (RanBP6) [MASS=124713]                                                                                                                                                              | 0.00 | 0.90  | 5.79 | 0.00 | 1 | 1 | 3 | LC[339]DIFAVLAR                                | 1 |
| RPC1_HUMAN (O14802) DNA-directed RNA polymerase III largest subunit (EC 2.7.7.6) (RPC155) (RPC1) [MASS=155748]                                                                                                                 | 0.00 | 2.16  | 1.18 | 0.00 | 1 | 1 | 3 | YMRAQMEPGSAVGALC[339]AQSIGEPGTQM[147]TLK       | 1 |
| RPP29_HUMAN (O95707) Ribonuclease P protein subunit p29 (EC 3.1.26.5) (hPOP4) [MASS=25425]                                                                                                                                     | *    | 7.27  | *    | *    | * | 1 | 2 | STPRM[147]SPQAREDQLQR                          | 1 |
| RPTN_HUMAN (Q6XPR3) Repetin [MASS=90730]                                                                                                                                                                                       | 0.00 | 3.83  | 8.28 | 0.00 | 1 | 1 | 3 | M[147]AQLLNSILSVIDVFHXYAKGNNGDC[339]ALLC[339]K | 1 |
| RS25_HUMAN (P62851) 40S ribosomal protein S25 [MASS=13742]                                                                                                                                                                     | 0.00 | 20.00 | 0.50 | 0.00 | 1 | 2 | 1 | LVSKHR                                         | 1 |
| RSMB_HUMAN (P14678) Small nuclear ribonucleoprotein-associated proteins B and B' (snRNP-B) (Sm protein B/B') (Sm-B/Sm-B') (SmB/SmB') [MASS=24610]                                                                              | *    | 27.50 | *    | *    | * | 4 | 2 | LC[330]KEVPNYKLITPAVVSER                       | 1 |
|                                                                                                                                                                                                                                |      |       |      |      |   |   | 2 | C[339]ILQDGRIFIGTFKAFDK                        | 1 |
|                                                                                                                                                                                                                                |      |       |      |      |   |   | 3 | GTPMGM[147]PPPGM[147]RPPPPGM[147]RGPPPPGMR     | 1 |
|                                                                                                                                                                                                                                |      |       |      |      |   |   | 1 | PPPPGM[147]R                                   | 1 |
|                                                                                                                                                                                                                                |      |       |      |      |   |   | 2 | VPLAGAAGGPGIGR                                 | 1 |
| RT06_HUMAN (P82932) Mitochondrial 28S ribosomal protein S6 (S6mt) (MRP-S6) [MASS=14095]                                                                                                                                        | *    | 11.29 | *    | *    | * | 1 | 1 | RTIEALM[147]DRGAIVR                            | 1 |
| RTTEL1_HUMAN (Q9NZ71) Regulator of telomere elongation helicase 1 (EC 3.6.1.-) (Helicase-like protein NHL) [MASS=152373]                                                                                                       | *    | 1.07  | *    | *    | * | 1 | 3 | TM[147]PAPAPRATAPSVR                           | 1 |
| RTN1_HUMAN (Q16799) Reticulon-1 (Neuroendocrine-specific protein) [MASS=83617]                                                                                                                                                 | 1.00 | 2.96  | 0.63 | 0.11 | 2 | 2 | 2 | YTDC[339]LQFYVNSTLK                            | 1 |
|                                                                                                                                                                                                                                |      |       |      |      |   |   | 2 | YTDC[330]LQFYVNSTLK                            | 1 |
|                                                                                                                                                                                                                                |      |       |      |      |   |   | 2 | PEGVREPK                                       | 1 |



|                                                                                                                                                                                                                                                                              |      |       |      |      |   |   |   |                                               |   |
|------------------------------------------------------------------------------------------------------------------------------------------------------------------------------------------------------------------------------------------------------------------------------|------|-------|------|------|---|---|---|-----------------------------------------------|---|
| RTN4_HUMAN (Q9NQC3) Reticulon-4 (Neurite outgrowth inhibitor) (Nogo protein) (Foccen) (Neuroendocrine-specific protein) (NSP) (Neuroendocrine-specific protein C homolog) (RTN-x) (Reticulon-5) [MASS=129930]                                                                | 0.97 | 1.85  | 0.89 | 0.00 | 1 | 2 | 2 | YSNSALGHVNC[339]TIK                           | 1 |
|                                                                                                                                                                                                                                                                              |      |       |      |      |   |   | 1 | KAQIVTEK                                      | 1 |
| RUNX1_HUMAN (Q01196) Runt-related transcription factor 1 (Core-binding factor, alpha 2 subunit) (CBF-alpha 2) (Acute myeloid leukemia 1 protein) (Oncogene AML-1) (Polyomavirus enhancer-binding protein 2 alpha B subunit) (PEBP2-alpha B) (PEA2-alpha B) (SL [MASS=48796]) | 0.28 | 7.73  | *    | *    | * | 1 | 3 | VVALGDVDPDGLTVTM[147]AGNDENYSAELRNATAAM[147]K | 2 |
|                                                                                                                                                                                                                                                                              |      |       |      |      |   |   | 3 | KLDTNSDGQLDFSEFLNLIGGLAMAC[339]HDSFLK         | 2 |
| S10AB_HUMAN (P31949) Protein S100-A11 (S100 calcium-binding protein A11) (Protein S100C) (Calgizzarin) (MLN 70) [MASS=11740]                                                                                                                                                 | 1.00 | 60.00 | 1.27 | 0.09 | 7 | 2 | 3 | LDTNSDGQLDFSEFLNLIGGLAM[147]AC[339]HDSFLK     | 2 |
|                                                                                                                                                                                                                                                                              |      |       |      |      |   |   | 3 | LDTNSDGQLDFSEFLNLIGGLAM[147]AC[330]HDSFLK     | 1 |
|                                                                                                                                                                                                                                                                              |      |       |      |      |   |   | 3 | KLDTNSDGQLDFSEFLNLIGGLAM[147]AC[330]HDSFLK    | 2 |
| S22A9_HUMAN (Q8IVM8) Solute carrier family 22 member 9 (Organic anion transporter 4) [MASS=62169]                                                                                                                                                                            | 0.00 | 5.06  | 0.13 | 0.00 | 1 | 1 | 3 | ASQMLLMFLLAIC[330]LLAIIFVPQEM[147]QTLR        | 1 |
| SACS_HUMAN (Q9NZJ4) Sacsin [MASS=436973]                                                                                                                                                                                                                                     | *    | 0.86  | *    | *    | * | 3 | 1 | SVISAHK                                       | 1 |
|                                                                                                                                                                                                                                                                              |      |       |      |      |   |   | 3 | PFFDNLLQDELQHLK                               | 1 |
|                                                                                                                                                                                                                                                                              |      |       |      |      |   |   | 1 | KTVAENVYRLK                                   | 1 |
| SAM50_HUMAN (Q9Y512) Sorting and assembly machinery component 50 homolog [MASS=51962]                                                                                                                                                                                        | 1.00 | 13.01 | 1.19 | 0.09 | 2 | 3 | 2 | THFFLNAGNLC[330]NLNYGEGPK                     | 1 |
|                                                                                                                                                                                                                                                                              |      |       |      |      |   |   | 2 | IC[339]DGVQFGAGIR                             | 1 |
|                                                                                                                                                                                                                                                                              |      |       |      |      |   |   | 3 | RLTGSYNTM[147]VGNNEGSM[147]VLGLKLPNLLGR       | 1 |
| SAP_HUMAN (P07602) Proactivator polypeptide precursor [Contains: Saposin A (Protein A); Saposin B-Val; Saposin B (Sphingolipid activator protein 1) (SAP-1) (Cerebroside sulfate activator) (CSAct) (Dispersin) (Sulfatide/GM1 activator); Saposin C (Co-beta- [MASS=58112]) | 1.00 | 7.63  | 1.11 | 0.12 | 8 | 2 | 1 | GC[339]SFLPDPYQK                              | 1 |
|                                                                                                                                                                                                                                                                              |      |       |      |      |   |   | 3 | QC[339]DQFVAEYEPVLIIEILVEVM[147]DPSFVC[339]LK | 2 |
|                                                                                                                                                                                                                                                                              |      |       |      |      |   |   | 2 | GC[339]SFLPDPYQK                              | 3 |
| SAR1A_HUMAN (Q9NR31) GTP-binding protein SAR1a (COPII-associated small GTPase) [MASS=22367]                                                                                                                                                                                  | 0.97 | 17.17 | 0.60 | 0.00 | 1 | 2 | 2 | NYLPAINGIVFLVDC[330]ADHSR                     | 1 |
|                                                                                                                                                                                                                                                                              |      |       |      |      |   |   | 2 | SGKLVFLGLDNAGK                                | 1 |

|                                                                                                                                                                                                               |      |       |      |      |   |   |                                                                                                 |                 |   |
|---------------------------------------------------------------------------------------------------------------------------------------------------------------------------------------------------------------|------|-------|------|------|---|---|-------------------------------------------------------------------------------------------------|-----------------|---|
| SCNND_HUMAN (P51172) Amiloride-sensitive sodium channel subunit delta (Epithelial Na+ channel subunit delta) (Delta ENaC) (Nonvoltage-gated sodium channel 1 subunit delta) (SCNED) (Delta NaCH) [MASS=70274] | 0.00 | 1.57  | 1.31 | 0.00 | 1 | 1 | 2                                                                                               | HPAWGH[C339]FYR | 1 |
| SCOT_HUMAN (P55809) Succinyl-CoA:3-ketoacid-coenzyme A transferase 1, mitochondrial precursor (EC 2.8.3.5) (Somatic-type succinyl CoA:3-oxoacid CoA-transferase) (Scot-S) [MASS=56157]                        | 0.42 | 9.23  | 1.73 | 0.00 | 1 | 3 | 2 GLTLIELWEGLTVDDVQKSTGC[330]DFAVSPK<br>1 STGC[339]DFAVSPK<br>2 C[339]TLPLTGK                   | 1<br>1<br>1     |   |
| SEM3A_HUMAN (Q14563) Semaphorin-3A precursor (Semaphorin III) (Sema III) [MASS=88889]                                                                                                                         | *    | 1.04  | *    | *    | * | 1 | 2 DDDGDGSK                                                                                      | 1               |   |
| SEM3D_HUMAN (O95025) Semaphorin-3D precursor [MASS=89651]                                                                                                                                                     | *    | 1.54  | *    | *    | * | 1 | 2 LDTHNLESGRLK                                                                                  | 1               |   |
| SENP6_HUMAN (Q9GZR1) Sentrin-specific protease 6 (EC 3.4.22.-) (Sentrin/SUMO-specific protease SENP6) (SUMO-1-specific protease 1) [MASS=126144]                                                              | *    | 1.44  | *    | *    | * | 2 | 1 KARMK<br>2 ERKEYPPHVQK                                                                        | 3<br>1          |   |
| SEPT5_HUMAN (Q99719) Septin-5 (Peanut-like protein 1) (Cell division control-related protein 1) (CDCrel-1) [MASS=42777]                                                                                       | *    | 5.15  | *    | *    | * | 1 | 3 LYPWGIVEVENQAHC[339]DFVK                                                                      | 1               |   |
| SEPT7_HUMAN (Q16181) Septin-7 (CDC10 protein homolog) [MASS=50680]                                                                                                                                            | *    | 15.56 | *    | *    | * | 3 | 3 VNIIPLIKADTLTPEEC[339]QQFKK<br>3 VQC[339]C[330]LYFIAPSGHGLKPLDIEFMKR<br>3 LAAVTYNGVDNKNKGQLTK | 1<br>1<br>1     |   |
| SEPT8_HUMAN (Q92599) Septin-8 [MASS=55625]                                                                                                                                                                    | *    | 2.49  | *    | *    | * | 1 | 3 ELEEETNAFNRR                                                                                  | 1               |   |
| SFR15_HUMAN (O95104) Splicing factor, arginine/serine-rich 15 (CTD-binding SR-like protein RA4) [MASS=125868]                                                                                                 | 0.00 | 0.87  | 0.77 | 0.00 | 1 | 1 | 2 GC[330]AYIVMVHR                                                                               | 1               |   |
| SFRP2_HUMAN (Q96HF1) Secreted frizzled-related protein 2 precursor (sFRP-2) (Secreted apoptosis-related protein 1) (SARP-1) (Frizzled-related protein 2) (FRP-2) [MASS=33490]                                 | 0.61 | 4.41  | 0.20 | 0.00 | 1 | 1 | 2 NDDDNDIM[147]ETLC[330]K                                                                       | 1               |   |

|                                                                                                                                                                                                                                                                              |      |       |      |      |   |   |   |                                           |   |
|------------------------------------------------------------------------------------------------------------------------------------------------------------------------------------------------------------------------------------------------------------------------------|------|-------|------|------|---|---|---|-------------------------------------------|---|
| SFTA1_HUMAN (Q8IWL2) Pulmonary surfactant-associated protein A1 precursor (SP-A1) (SP-A) (PSP-A) (PSPA) (Alveolar proteinosis protein) (35 kDa pulmonary surfactant-associated protein) [MASS=26242]                                                                         | 0.00 | 8.47  | 4.80 | 0.00 | 1 | 1 | 2 | DVC[339]VGSPGIPGTPGSHGLPGR                | 1 |
| SFXN1_HUMAN (Q9H9B4) Sideroflexin-1 (Tricarboxylate carrier protein) (TCC) [MASS=35488]                                                                                                                                                                                      | 1.00 | 15.58 | 1.15 | 0.01 | 2 | 2 | 2 | FVPFAAVAAANC[339]INIPLMR                  | 1 |
|                                                                                                                                                                                                                                                                              |      |       |      |      |   |   | 2 | FVPFAAVAAANC[330]INIPLM[147]R             | 1 |
|                                                                                                                                                                                                                                                                              |      |       |      |      |   |   | 2 | FVPFAAVAAANC[339]INIPLM[147]R             | 1 |
|                                                                                                                                                                                                                                                                              |      |       |      |      |   |   | 3 | QAITQVVVSRILM[147]AAPGM[147]AIPPFIMNTLEKK | 1 |
| SHPS1_HUMAN (P78324) Tyrosine-protein phosphatase non-receptor type substrate 1 precursor (SHP substrate 1) (SHPS-1) (Inhibitory receptor SHPS-1) (Signal-regulatory protein alpha-1) (Sirp-alpha-1) (Sirp-alpha-2) (Sirp-alpha-3) (MyD-1 antigen) (Brain Ig-I) [MASS=54812] | 0.00 | 8.55  | 0.84 | 0.00 | 1 | 2 | 3 | ATPQHTVSFTC[339]ESHGFSR                   | 1 |
|                                                                                                                                                                                                                                                                              |      |       |      |      |   |   | 3 | ATPQHTVSFTC[330]ESHGFSRDLTK               | 1 |
| SIA4C_HUMAN (Q11206) CMP-N-acetylneuraminase-beta-galactosamide-alpha-2,3-sialyltransferase (EC 2.4.99.-) (Beta-galactoside alpha-2,3-sialyltransferase) (Alpha 2,3-sialyltransferase IV) (Alpha 2,3-ST) (GalNAc6S) (STZ) (SIAT4-C) (ST3Gal III) (SAT-3) (ST- [MASS=38045])  | 0.00 | 15.32 | 0.44 | 0.00 | 1 | 2 | 3 | PTTGLLAILLALHLC[330]DLVHIAGFGYPDAYNKK     | 1 |
|                                                                                                                                                                                                                                                                              |      |       |      |      |   |   | 2 | VLAITSSSIPKNIQLRC[330]R                   | 1 |
| SIAL_HUMAN (P21815) Bone sialoprotein-2 precursor (Bone sialoprotein II) (BSP II) (Cell-binding sialoprotein) (Integrin-binding sialoprotein) [MASS=35018]                                                                                                                   | 0.60 | 5.68  | 0.31 | 0.00 | 1 | 1 | 2 | TALILLSILGMAC[330]AFSM[147]K              | 1 |
| SIN3B_HUMAN (O75182) Paired amphipathic helix protein Sin3b (Transcriptional corepressor Sin3b) (Histone deacetylase complex subunit Sin3b) [MASS=133066]                                                                                                                    | 0.00 | 1.38  | 2.11 | 0.00 | 1 | 1 | 3 | GTLC[339]RAKQVQPLVLLR                     | 1 |
| SIPA1_HUMAN (Q96FS4) Signal-induced proliferation-associated protein 1 (Sipa-1) (GTPase-activating protein Spa-1) (p130 SPA-1) [MASS=112148]                                                                                                                                 | *    | 3.26  | *    | *    | * | 2 | 3 | AAPRGPGAELQAAGSLVWGV                      | 1 |
|                                                                                                                                                                                                                                                                              |      |       |      |      |   |   | 2 | M[147]PMWAGVGSPRR                         | 1 |
| SIRB1_HUMAN (O00241) Signal-regulatory protein beta-1 precursor (SIRP-beta-1) (CD172b antigen) [MASS=43255]                                                                                                                                                                  | *    | 3.52  | *    | *    | * | 1 | 3 | GLQLTWLENGNVS                             | 1 |

|                                                                                                                                                                                                                                 |      |      |      |      |   |   |                                                                                                |                                  |    |
|---------------------------------------------------------------------------------------------------------------------------------------------------------------------------------------------------------------------------------|------|------|------|------|---|---|------------------------------------------------------------------------------------------------|----------------------------------|----|
| SIRT2_HUMAN (Q8IXJ6) NAD-dependent deacetylase sirtuin-2 (EC 3.5.1.-) (SIR2-like) (SIR2-like protein 2) [MASS=43182]                                                                                                            | 0.72 | 5.66 | 0.92 | 0.00 | 1 | 1 | 3                                                                                              | C[339]EDC[339]QSLVKPDIVFFGESLPAR | 1  |
| SIRT7_HUMAN (Q9NRC8) NAD-dependent deacetylase sirtuin-7 (EC 3.5.1.-) (SIR2-like protein 7) [MASS=44898]                                                                                                                        | 0.00 | 6.50 | 0.33 | 0.00 | 1 | 2 | 2 ADTILC[339]LGSSSLKVLKK<br>2 LHGKC[330]DDVMR                                                  | 1<br>1                           |    |
| SLIK4_HUMAN (Q8IW52) SLIT and NTRK-like protein 4 precursor [MASS=94330]                                                                                                                                                        | *    | 2.63 | *    | *    | * | 1 | 3                                                                                              | HEGLGNPDC[330]GSM[147]QLQLRKHDHK | 1  |
| SLIT2_HUMAN (O94813) Slit homolog 2 protein precursor (Slit-2) [Contains: Slit homolog 2 protein N-product; Slit homolog 2 protein C-product] [MASS=169869]                                                                     | *    | 0.98 | *    | *    | * | 1 | 2                                                                                              | C[330]EGTTVDC[330]SNQKLNK        | 1  |
| SMAD6_HUMAN (O43541) Mothers against decapentaplegic homolog 6 (SMAD 6) (Mothers against DPP homolog 6) (Smad6) (hSMAD6) [MASS=53496]                                                                                           | *    | 1.01 | *    | *    | * | 1 | 1                                                                                              | M[147]FRSK                       | 1  |
|                                                                                                                                                                                                                                 |      |      |      |      |   |   | 2                                                                                              | GYEYC[339]R                      | 12 |
| SMCA1_HUMAN (P28370) Probable global transcription activator SNF2L1 (EC 3.6.1.-) (ATP-dependent helicase SMARCA1) (SWI/SNF-related matrix-associated actin-dependent regulator of chromatin subfamily A member 1) [MASS=114731] | 0.00 | 0.61 | 5.26 | 0.00 | 1 | 1 |                                                                                                |                                  |    |
| SMG1_HUMAN (Q96Q15) Serine/threonine-protein kinase SMG1 (EC 2.7.11.1) (SMG-1) (hSMG-1) (Lambda/iota protein kinase C-interacting protein) (Lambda-interacting protein) (61E3.4) [MASS=410259]                                  | *    | 1.64 | *    | *    | * | 4 | 1 AVRDPK<br>3 HLDNVLIDM[147]TTGEVVHIDYNVC[330]FEKGKSLR<br>2 SM[147]SYSDERLSNLLR<br>2 GIIPQLFSR | 1<br>1<br>1<br>1                 |    |
| SMRC1_HUMAN (Q92922) SWI/SNF-related matrix-associated actin-dependent regulator of chromatin subfamily C member 1 (SWI/SNF complex 155 kDa subunit) (BRG1-associated factor 155) [MASS=122752]                                 | 0.00 | 1.27 | 0.26 | 0.00 | 1 | 1 | 2                                                                                              | AGGALC[330]HILGAAYK              | 3  |

|                                                                                                                                                                     |      |       |      |      |   |   |             |                                                                         |             |
|---------------------------------------------------------------------------------------------------------------------------------------------------------------------|------|-------|------|------|---|---|-------------|-------------------------------------------------------------------------|-------------|
| SMYD4_HUMAN (Q8IYR2) SET and MYND domain-containing protein 4 [MASS=89122]                                                                                          | *    | 1.87  | *    | *    | * | 1 | 3           | DHLVSRLQDLQQQVR                                                         | 1           |
| SNAB_HUMAN (Q9H115) Beta-soluble NSF attachment protein (SNAP-beta) (N-ethylmaleimide-sensitive factor attachment protein, beta) [MASS=33557]                       | 0.69 | 7.38  | 2.17 | 0.00 | 1 | 2 | 2<br>1      | AALC[330]HFIVDELNAK<br>GLFGGNTR                                         | 1<br>1      |
| SP110_HUMAN (Q9HB58) Sp110 nuclear body protein (Speckled 110 kDa) (Transcriptional coactivator Sp110) (Interferon-induced protein 41/75) [MASS=78504]              | 0.00 | 2.47  | 0.89 | 0.00 | 1 | 1 | 2           | RSSGSQQC[339]HHVSKTLER                                                  | 1           |
| SPRE_HUMAN (P35270) Sepiapterin reductase (EC 1.1.1.153) (SPR) [MASS=28048]                                                                                         | 0.00 | 11.88 | 1.59 | 0.00 | 1 | 1 | 3           | GFVDLSDSTQVNNYWALNLTSM[147]LC[339]LTSSVLK                               | 1           |
| SRA1_HUMAN (Q9HD15) Steroid receptor RNA activator 1 (Steroid receptor RNA activator protein) (SRAP) [MASS=25673]                                                   | 0.00 | 6.78  | 1.38 | 0.00 | 1 | 1 | 2           | C[339]PAGQAEVEMAELYVK                                                   | 1           |
| SRBS1_HUMAN (Q9BX66) Sorbin and SH3 domain-containing protein 1 (Ponsin) (c-Cbl-associated protein) (CAP) (SH3 domain protein 5) (SH3P12) [MASS=142454]             | 0.00 | 1.16  | 0.47 | 0.00 | 1 | 1 | 2           | DLSLC[330]QTELEADLEK                                                    | 1           |
| SRPR_HUMAN (P08240) Signal recognition particle receptor subunit alpha (SR-alpha) (Docking protein alpha) (DP-alpha) [MASS=69811]                                   | *    | 1.88  | *    | *    | * | 1 | 2           | AGAVEQLRTHTR                                                            | 1           |
| SSDH_HUMAN (P51649) Succinate semialdehyde dehydrogenase, mitochondrial precursor (EC 1.2.1.24) (NAD(+)-dependent succinic semialdehyde dehydrogenase) [MASS=57214] | 0.99 | 5.79  | 1.63 | 0.13 | 2 | 1 | 3           | NFFEPTLLC[339]NVTQDMLC[339]THEETFGPLAPVIK                               | 2           |
| STK35_HUMAN (Q8TDR2) Serine/threonine-protein kinase 35 (EC 2.7.11.1) (CLP-36-interacting kinase) (Cliik1) (PDLIM1-interacting kinase 1) [MASS=44573]               | 0.00 | 3.99  | 1.98 | 0.00 | 1 | 1 | 2           | VADFGLSKVC[339]AGLAPR                                                   | 1           |
| STOX1_HUMAN (Q6ZVD7) Storkhead-box protein 1 (Winged helix domain-containing protein) [MASS=110961]                                                                 | *    | 4.85  | *    | *    | * | 3 | 2<br>2<br>3 | ASFEAEVIQDTIGDTGK<br>ANARC[330]FWNARLAR<br>M[147]ARPVQLAPGSLALVLC[339]R | 1<br>1<br>1 |

|                                                                                                                                                                                                          |      |      |      |      |   |   |                                                                                                                                                 |                            |
|----------------------------------------------------------------------------------------------------------------------------------------------------------------------------------------------------------|------|------|------|------|---|---|-------------------------------------------------------------------------------------------------------------------------------------------------|----------------------------|
| STXB1_HUMAN (P61764) Syntaxin-binding protein 1 (Unc-18 homolog) (Unc-18A) (Unc-18-1) (N-Sec1) (p67) [MASS=67568]                                                                                        | 1.00 | 5.56 | 1.31 | 0.04 | 3 | 2 | 3 AAHVFFTDSC[339]PDALFNELVK<br>2 YSTHLHLAEDC[330]MK<br>2 YSTHLHLAEDC[339]M[147]K<br><br>1 VNPSSYSR                                              | 1<br>1<br>1<br><br>8       |
| SUHW4_HUMAN (Q6N043) Suppressor of hairy wing homolog 4 [MASS=109298]                                                                                                                                    | *    | 0.82 | *    | *    | * | 1 |                                                                                                                                                 |                            |
| SYA_HUMAN (P49588) Alanyl-tRNA synthetase (EC 6.1.1.7) (Alanine--tRNA ligase) (AlaRS) (NY-REN-42 antigen) [MASS=106801]                                                                                  | 0.98 | 1.96 | 1.06 | 0.00 | 1 | 1 | 2 NVGC[339]LQEALQLATSFAQLR                                                                                                                      | 1                          |
| SYIM_HUMAN (Q9NSE4) Isoleucyl-tRNA synthetase, mitochondrial precursor (EC 6.1.1.5) (Isoleucine--tRNA ligase) (IleRS) [MASS=113791]                                                                      | 0.79 | 2.87 | 0.43 | 0.00 | 1 | 2 | 2 KPGLEEAVESAC[330]AMR<br>2 EESSYKVIVMPPTK                                                                                                      | 1<br>1                     |
| SYLC_HUMAN (Q9P2J5) Leucyl-tRNA synthetase, cytoplasmic (EC 6.1.1.4) (Leucine--tRNA ligase) (LeuRS) [MASS=134465]                                                                                        | *    | 3.49 | *    | *    | * | 3 | 1 KTIQKK<br>2 VIASELGSM[147]PELKMYM[147]K<br>2 VMPFVAM[147]IKENLEKMGPR                                                                          | 1<br>1<br>1                |
| SYN1_HUMAN (P17600) Synapsin-1 (Synapsin I) (Brain protein 4.1) [MASS=74111]                                                                                                                             | *    | 1.42 | *    | *    | * | 1 | 2 MGHAHSGM[147]GK                                                                                                                               | 1                          |
| SYNE2_HUMAN (Q8WXH0) Nesprin-2 (Nuclear envelope spectrin repeat protein 2) (Syne-2) (Synaptic nuclear envelope protein 2) (Nucleus and actin connecting element protein) (Protein NUANCE) [MASS=796379] | *    | 1.39 | *    | *    | * | 6 | 3 TEAELEM[147]LKM[147]AKPPSDIQEIELR<br>3 IEEINNGLHNVEKM[147]LQKK<br>3 LPAVTSEEGGVAER<br>2 VAKLRDEGER<br>2 TLQNMNR<br>3 ELIKELEQSLASWTQNLKELQTMK | 1<br>1<br>1<br>1<br>1<br>1 |
| SYNJ1_HUMAN (O43426) Synaptojanin-1 (EC 3.1.3.36) (Synaptic inositol-1,4,5-trisphosphate 5-phosphatase 1) [MASS=173345]                                                                                  | 0.00 | 2.16 | 0.76 | 0.00 | 1 | 2 | 2 SRASSSLDGFK<br>2 TSPC[339]QSPTISEGPVPSLPIRPSR                                                                                                 | 1<br>1                     |
| SYPH_HUMAN (P08247) Synaptophysin (Major synaptic vesicle protein p38) [MASS=33845]                                                                                                                      | 1.00 | 3.83 | 1.05 | 0.09 | 5 | 1 | 1 LHQVYFDAPTC[330]R<br>2 LHQVYFDAPTC[339]R<br>1 LHQVYFDAPTC[339]R<br>2 LHQVYFDAPTC[330]R                                                        | 1<br>1<br>1<br>2           |

|                                                                                                                                        |                                       |      |      |      |   |   |                                                                                                                             |                                            |       |
|----------------------------------------------------------------------------------------------------------------------------------------|---------------------------------------|------|------|------|---|---|-----------------------------------------------------------------------------------------------------------------------------|--------------------------------------------|-------|
| SYPM_HUMAN (Q7L3T8) Probable prolyl-tRNA synthetase, mitochondrial precursor (EC 6.1.1.15) (Proline--tRNA ligase) (ProRS) [MASS=53262] | *                                     | 1.47 | *    | *    | * | 1 | 1                                                                                                                           | AMEKLVLR                                   | 1     |
| SYT11_HUMAN (Q9BT88) Synaptotagmin-11 (Synaptotagmin XI) (SytXI) [MASS=48306]                                                          | 0.00                                  | 3.25 | 0.26 | 0.12 | 2 | 1 | 2                                                                                                                           | GPSSGSC[330]IDQLPIK                        | 2     |
| SYT14_HUMAN (Q8NB59) Synaptotagmin-14 (Synaptotagmin XIV) (SytXIV) [MASS=62288]                                                        | 0.00                                  | 1.26 | 2.69 | 0.00 | 1 | 1 | 2                                                                                                                           | C[339]KTSIRR                               | 1     |
| SYT1_HUMAN (P21579) Synaptotagmin-1 (Synaptotagmin I) (SytI) (p65) [MASS=47573]                                                        | *                                     | 7.11 | *    | *    | * | 2 | 2                                                                                                                           | DDDAETGLTDGEEKEEPK                         | 1     |
|                                                                                                                                        |                                       |      |      |      |   |   | 2                                                                                                                           | VQVVVTVLDDYDK                              | 1     |
| TATD2_HUMAN (Q93075) TatD DNase domain-containing deoxyribonuclease 2 (EC 3.1.21.-) [MASS=85039]                                       | *                                     | 3.02 | *    | *    | * | 1 | 3                                                                                                                           | EVVMEHPSSGSDWSDVEEISTVR                    | 1     |
|                                                                                                                                        |                                       |      |      |      |   |   | 2                                                                                                                           | SIQFVDWC[330]PTGFK                         | 2     |
|                                                                                                                                        |                                       |      |      |      |   |   | 2                                                                                                                           | AYHEQLSVAEITNAC[330]FEPANQM[147]VK         | 1     |
|                                                                                                                                        |                                       |      |      |      |   |   | 3                                                                                                                           | AYHEQLSVAEITNAC[339]FEPANQM[147]VK         | 2     |
|                                                                                                                                        |                                       |      |      |      |   |   | 2                                                                                                                           | YMAC[330]C[330]LLYR                        | 1     |
|                                                                                                                                        |                                       |      |      |      |   |   | 3                                                                                                                           | AYHEQLSVAEITNAC[330]FEPANQMVK              | 1     |
|                                                                                                                                        |                                       |      |      |      |   |   | 3                                                                                                                           | AYHEQLSVAEITNAC[330]FEPANQM[147]VK         | 1     |
|                                                                                                                                        |                                       |      |      |      |   |   | 1                                                                                                                           | SIQFVDWC[339]PTGFK                         | 1     |
|                                                                                                                                        |                                       |      |      |      |   |   | 3                                                                                                                           | LSDQC[330]TGLQGFLVFHFSFGGGTGSFTSLLM[147]ER | 2     |
|                                                                                                                                        |                                       |      |      |      |   |   | TBA1_HUMAN (P68366) Tubulin alpha-1 chain (Alpha-tubulin 1) (Testis-specific alpha-tubulin) (Tubulin H2-alpha) [MASS=49924] | 1.00                                       | 17.41 |
| 3                                                                                                                                      | LSDQC[330]TGLQGFLVFHFSFGGGTGSFTSLLMER | 1    |      |      |   |   |                                                                                                                             |                                            |       |
| 2                                                                                                                                      | SIQFVDWC[339]PTGFK                    | 3    |      |      |   |   |                                                                                                                             |                                            |       |
| 2                                                                                                                                      | YM[147]AC[339]C[339]LLYR              | 4    |      |      |   |   |                                                                                                                             |                                            |       |
| 2                                                                                                                                      | YM[147]AC[330]C[330]LLYR              | 3    |      |      |   |   |                                                                                                                             |                                            |       |
| 2                                                                                                                                      | YM[147]AC[330]C[330]MLYR              | 1    |      |      |   |   |                                                                                                                             |                                            |       |
| 2                                                                                                                                      | TIQFVDWC[330]PTGFK                    | 1    |      |      |   |   |                                                                                                                             |                                            |       |
| TBA2_HUMAN (Q13748) Tubulin alpha-2 chain (Alpha-tubulin 2) [MASS=49959]                                                               | 1.00                                  | 4.89 | 0.34 | 0.00 | 1 | 2 | 2                                                                                                                           | YM[147]AC[330]C[330]MLYR                   | 1     |
|                                                                                                                                        |                                       |      |      |      |   |   | 2                                                                                                                           | TIQFVDWC[330]PTGFK                         | 1     |

|                                                                                              |      |       |      |      |    |   |   |                                                 |   |
|----------------------------------------------------------------------------------------------|------|-------|------|------|----|---|---|-------------------------------------------------|---|
| TBA3_HUMAN (Q71U36) Tubulin alpha-3 chain (Alpha-tubulin 3) (Tubulin B-alpha-1) [MASS=50135] | 1.00 | 7.10  | 1.13 | 0.04 | 5  | 1 | 3 | LADQC[339]TGLQGFLVFHFSFGGGTGSGFTSLLM[147]ER     | 3 |
|                                                                                              |      |       |      |      |    |   | 3 | LADQC[339]TGLQGFLVFHFSFGGGTGSGFTSLLMER          | 1 |
|                                                                                              |      |       |      |      |    |   | 3 | LTTPTYGDLNHLVSATM[147]SGVTTC[330]LR             | 2 |
|                                                                                              |      |       |      |      |    |   | 2 | LTTPTYGDLNHLVSATM[147]SGVTTC[339]LR             | 2 |
|                                                                                              |      |       |      |      |    |   | 3 | EAESC[330]DC[330]LQGFQLTHSLGGGTGSGMGTLLISK      | 1 |
|                                                                                              |      |       |      |      |    |   | 2 | NMM[147]AAC[330]DPR                             | 1 |
|                                                                                              |      |       |      |      |    |   | 2 | NM[147]M[147]AAC[330]DPR                        | 1 |
|                                                                                              |      |       |      |      |    |   | 3 | LTTPTYGDLNHLVSATMSGVTTC[339]LR                  | 1 |
|                                                                                              |      |       |      |      |    |   | 3 | EAESC[330]DC[330]LQGFQLTHSLGGGTGSGM[147]GTLLISK | 1 |
|                                                                                              |      |       |      |      |    |   | 2 | TAVC[330]DIPPR                                  | 4 |
| TBB2C_HUMAN (P68371) Tubulin beta-2C chain (Tubulin beta-2 chain) [MASS=49831]               | 1.00 | 16.85 | *    | *    | *  | 4 |   |                                                 |   |
|                                                                                              |      |       |      |      |    |   | 3 | LTTPTYGDLNHLVSATM[147]SGVTTC[339]LR             | 2 |
|                                                                                              |      |       |      |      |    |   | 2 | LTTPTYGDLNHLVSATMSGVTTC[339]LR                  | 3 |
|                                                                                              |      |       |      |      |    |   | 2 | NM[147]M[147]AAC[339]DPR                        | 1 |
|                                                                                              |      |       |      |      |    |   | 1 | TAVC[339]DIPPR                                  | 1 |
|                                                                                              |      |       |      |      |    |   | 3 | EAESC[339]DC[339]LQGFQLTHSLGGGTGSGM[147]GTLLISK | 2 |
|                                                                                              |      |       |      |      |    |   | 2 | EIVHIQAGQC[339]GNQIGAK                          | 2 |
|                                                                                              |      |       |      |      |    |   | 2 | EIVHIQAGQC[330]GNQIGAK                          | 3 |
|                                                                                              |      |       |      |      |    |   | 2 | M[147]REIVHIQAGQC[339]GNQIGAK                   | 1 |
|                                                                                              |      |       |      |      |    |   | 3 | M[147]REIVHIQAGQC[339]GNQIGAK                   | 2 |
| TBB2_HUMAN (P07437) Tubulin beta-2 chain [MASS=49671]                                        | 1.00 | 8.11  | 1.29 | 0.09 | 34 | 2 | 3 | MREIVHIQAGQC[330]GNQIGAK                        | 1 |
|                                                                                              |      |       |      |      |    |   | 3 | MREIVHIQAGQC[339]GNQIGAK                        | 1 |
|                                                                                              |      |       |      |      |    |   | 3 | M[147]REIVHIQAGQC[330]GNQIGAK                   | 2 |
|                                                                                              |      |       |      |      |    |   | 2 | MREIVHIQAGQC[330]GNQIGAK                        | 1 |
|                                                                                              |      |       |      |      |    |   | 3 | EIVHIQAGQC[330]GNQIGAK                          | 1 |
|                                                                                              |      |       |      |      |    |   | 3 | EIVHIQAGQC[330]GNQIGAK                          | 1 |
| TBB6_HUMAN (Q9BUF5) Tubulin beta-6 chain [MASS=49857]                                        | 1.00 | 4.04  | *    | *    | *  | 1 | 3 | EEFPDRIMNTFSVMPSPK                              | 1 |



|                                                                                                                                                                              |      |      |      |      |   |   |   |                                                |        |
|------------------------------------------------------------------------------------------------------------------------------------------------------------------------------|------|------|------|------|---|---|---|------------------------------------------------|--------|
| TBC14_HUMAN (Q9P2M4) TBC1 domain family member 14 [MASS=76626]                                                                                                               | *    | 2.06 | *    | *    | * | 1 | 2 | KSSTFPRTGYDSVK                                 | 1      |
| TBR1_HUMAN (Q16650) T-brain-1 protein (T-box brain protein 1) (TBR-1) (TES-56) [MASS=74053]                                                                                  | 0.29 | 3.96 | 1.79 | 0.00 | 1 | 2 | 2 | M[147]QLEHC[339]LSPSIMLSKK<br>SEVLAQRDC[330]EK | 1<br>1 |
| TCOF_HUMAN (Q13428) Treacle protein (Treacher Collins syndrome protein) [MASS=144311]                                                                                        | 0.00 | 4.39 | 1.11 | 0.00 | 1 | 4 | 2 | GSLGSQGAK                                      | 1      |
|                                                                                                                                                                              |      |      |      |      |   |   | 1 | KGAAPAPPR                                      | 1      |
|                                                                                                                                                                              |      |      |      |      |   |   | 2 | SSSSESEDEDVIPATQC[330]LTPGIR                   | 1      |
|                                                                                                                                                                              |      |      |      |      |   |   | 2 | GAAPAPPRKTGPAAAQVQVGK                          | 1      |
| TERA_HUMAN (P55072) Transitional endoplasmic reticulum ATPase (TER ATPase) (15S Mg(2+)-ATPase p97 subunit) (Valosin-containing protein) (VCP) [MASS=89190]                   | *    | 2.98 | *    | *    | * | 1 | 3 | EVDIGIPDATGRLEILQIHTKNMK                       | 1      |
| TEX15_HUMAN (Q9BXT5) Testis-expressed sequence 15 protein [MASS=315360]                                                                                                      | *    | 1.04 | *    | *    | * | 2 | 1 | MAHIR                                          | 1      |
|                                                                                                                                                                              |      |      |      |      |   |   | 3 | FSISTMLPPVSEC[339]INKNISNSSKK                  | 1      |
| TFP11_HUMAN (Q9UBB9) Tuftelin-interacting protein 11 [MASS=96819]                                                                                                            | 0.00 | 1.19 | *    | *    | * | 1 | 1 | FNEALDIM[147]NR                                | 1      |
| THIL_HUMAN (P24752) Acetyl-CoA acetyltransferase, mitochondrial precursor (EC 2.3.1.9) (Acetoacetyl-CoA thiolase) (T2) [MASS=45199]                                          | 1.00 | 2.81 | 1.20 | 0.02 | 3 | 1 | 2 | IHM[147]GSC[339]AENTAK                         | 2      |
|                                                                                                                                                                              |      |      |      |      |   |   | 2 | IHM[147]GSC[330]AENTAK                         | 1      |
| THIO_HUMAN (P10599) Thioredoxin (ATL-derived factor) (ADF) (Surface-associated sulphhydryl protein) (SASP) [MASS=11606]                                                      | 0.00 | 8.65 | 0.86 | 0.00 | 1 | 1 | 2 | C[330]M[147]PTFQFFK                            | 1      |
| THY1_HUMAN (P04216) Thy-1 membrane glycoprotein precursor (Thy-1 antigen) (CD90 antigen) (CDw90 antigen) [MASS=17935]                                                        | 0.98 | 8.70 | 1.12 | 0.00 | 1 | 1 | 2 | VTSLTAC[330]LVDQSLR                            | 1      |
| THYG_HUMAN (P01266) Thyroglobulin precursor [MASS=304731]                                                                                                                    | 0.00 | 1.23 | 0.70 | 0.00 | 1 | 2 | 2 | SRLEDIPVASLPDLHDIER                            | 1      |
|                                                                                                                                                                              |      |      |      |      |   |   | 2 | FTATSFGHPYVPSC[330]JR                          | 1      |
| TIAM1_HUMAN (Q13009) T-lymphoma invasion and metastasis-inducing protein 1 (TIAM-1 protein) [MASS=177637]                                                                    | *    | 0.38 | *    | *    | * | 1 | 1 | TDTAFK                                         | 1      |
| TIF1G_HUMAN (Q9UPN9) Transcription intermediary factor 1-gamma (TIF1-gamma) (Tripartite motif-containing protein 33) (RET-fused gene 7 protein) (Rfg7 protein) [MASS=122520] | *    | 1.60 | *    | *    | * | 2 | 1 | TSLSFK                                         | 3      |
|                                                                                                                                                                              |      |      |      |      |   |   | 2 | C[330]DPVPAANGAIR                              | 1      |

|                                                                                                                                                                                                                                                                            |      |       |      |      |   |   |             |                                                                     |             |
|----------------------------------------------------------------------------------------------------------------------------------------------------------------------------------------------------------------------------------------------------------------------------|------|-------|------|------|---|---|-------------|---------------------------------------------------------------------|-------------|
| TIM13_HUMAN (Q9Y5L4) Mitochondrial import inner membrane translocase subunit Tim13 [MASS=10500]                                                                                                                                                                            | 0.97 | 15.79 | 1.10 | 0.00 | 1 | 1 | 2           | C[339]IGKPGGSLDNSEQK                                                | 1           |
| TIM9_HUMAN (Q9Y5J7) Mitochondrial import inner membrane translocase subunit Tim9 [MASS=10378]                                                                                                                                                                              | 0.74 | 17.98 | 1.25 | 0.00 | 1 | 1 | 2           | LTETC[339]FLDC[339]VKDFTTTR                                         | 1           |
| TINAG_HUMAN (Q9UJW2) Tubulointerstitial nephritis antigen (TIN-Ag) [MASS=54646]                                                                                                                                                                                            | *    | 6.93  | *    | *    | * | 2 | 2           | RGLVSHAC[330]YPLFK<br>DQNATNNGC[339]AMASRS DGRGK                    | 1<br>1      |
| TLN2_HUMAN (Q9Y4G6) Talin-2 [MASS=271553]                                                                                                                                                                                                                                  | *    | 1.77  | *    | *    | * | 3 | 2<br>3<br>1 | GEAAQLGHK<br>ALRFGTEC[330]TLGYLDLLEHVLVILQKPTPEFK<br>KKQSK          | 1<br>1<br>1 |
| TMED4_HUMAN (Q7Z7H5) Transmembrane emp24 domain-containing protein 4 precursor [MASS=25943]                                                                                                                                                                                | 0.00 | 7.49  | 0.51 | 0.00 | 1 | 1 | 3           | C[330]FIEEIPDETMVIGNYR                                              | 1           |
| TNFL6_HUMAN (P48023) Tumor necrosis factor ligand superfamily member 6 (Fas antigen ligand) (Fas ligand) (CD178 antigen) (CD95L protein) (Apoptosis antigen ligand) (APTL) [Contains: Tumor necrosis factor ligand superfamily member 6, membrane form; Tumor [MASS=31485] | 0.00 | 7.12  | 2.25 | 0.00 | 1 | 1 | 2           | VYFRGQSC[339]NNLPLSHKVYM[147]R                                      | 1           |
| TNMD_HUMAN (Q9H2S6) Tenomodulin (TeM) (hTeM) (Chondromodulin-l-like protein) (ChM1L) (hChM1L) (Myodulin) (Tendin) [MASS=37130]                                                                                                                                             | 0.00 | 13.25 | 7.29 | 0.00 | 1 | 2 | 2<br>3      | VIMPC[330]NWWWVARM[147]LGR<br>IC[339]KSLKIC[339]GLVFGILALTLIVLFWGSK | 1<br>1      |
| TOM70_HUMAN (O94826) Mitochondrial precursor proteins import receptor (Translocase of outer membrane TOM70) [MASS=67454]                                                                                                                                                   | 1.00 | 8.55  | 0.55 | 0.72 | 3 | 4 | 1<br>1<br>3 | RNSER<br>AKAHEK<br>ILLDQVEEAVADFDEC[330]IR                          | 2<br>1<br>1 |
| TOPB1_HUMAN (Q92547) DNA topoisomerase 2-binding protein 1 (DNA topoisomerase II-binding protein 1) (DNA topoisomerase IIbeta-binding protein 1) (TopBP1) [MASS=170677]                                                                                                    | *    | 2.17  | *    | *    | * | 2 | 3<br>2      | VILHVDQSREAGFK<br>SAHRPHVVGAKWLLLEC[330]FSK                         | 1<br>1      |
| TPIS_HUMAN (P60174) Triosephosphate isomerase (EC 5.3.1.1) (TIM) (Triose-phosphate isomerase) [MASS=26538]                                                                                                                                                                 | 0.91 | 7.26  | 1.11 | 0.00 | 1 | 1 | 2           | VAHALAEGLGVIAC[330]IGEK                                             | 1           |

|                                                                                                                                                                                   |      |      |      |      |   |   |   |                                            |           |   |
|-----------------------------------------------------------------------------------------------------------------------------------------------------------------------------------|------|------|------|------|---|---|---|--------------------------------------------|-----------|---|
|                                                                                                                                                                                   |      |      |      |      |   |   |   | 2                                          | LLGKTDVQR | 7 |
| TR4_HUMAN (P49116) Orphan nuclear receptor TR4 (Orphan nuclear receptor TAK1) [MASS=65414]                                                                                        | *    | 1.51 | *    | *    | * | 1 |   |                                            |           |   |
| TRI15_HUMAN (Q9C019) Tripartite motif-containing protein 15 (Zinc finger protein B7) (RING finger protein 93) (Zinc finger protein 178) [MASS=52112]                              | 0.00 | 3.66 | 0.61 | 0.00 | 1 | 1 | 2 | C[330]QEDQKLQVLLTQIESK                     | 1         |   |
| TRI50_HUMAN (Q86XT4) Tripartite motif-containing protein 50 [MASS=54774]                                                                                                          | 0.00 | 5.95 | 0.35 | 0.00 | 1 | 1 | 3 | ARC[330]LEGIGGHTRGLVASLDM[147]QLEQAQGTR    | 1         |   |
| TRIM3_HUMAN (O75382) Tripartite motif-containing protein 3 (RING finger protein 22) (Brain-expressed RING finger protein) (RING finger protein 97) [MASS=80836]                   | 0.00 | 3.23 | 0.18 | 0.00 | 1 | 1 | 3 | EDSPGPEVQPMQKQFLVC[330]SIC[330]LDR         | 1         |   |
| TRIO_HUMAN (O75962) Triple functional domain protein (PTPRF-interacting protein) [MASS=341614]                                                                                    | *    | 2.04 | *    | *    | * | 4 | 2 | C[339]LEDPEKLGSLFVKHER                     | 1         |   |
|                                                                                                                                                                                   |      |      |      |      |   |   | 3 | EC[339]MDTYLWEM[147]TSGVEEIPPGIVNK         | 1         |   |
|                                                                                                                                                                                   |      |      |      |      |   |   | 2 | DFSLRM[147]JEK                             | 1         |   |
|                                                                                                                                                                                   |      |      |      |      |   |   | 2 | MKAM[147]DVLPIKKEK                         | 1         |   |
| TRPC5_HUMAN (Q9UL62) Short transient receptor potential channel 5 (TrpC5) (Htrp-5) (Htrp5) [MASS=111411]                                                                          | 0.00 | 4.01 | 1.35 | 0.00 | 1 | 2 | 2 | VNYSYPYRDRIPLQIVR                          | 1         |   |
|                                                                                                                                                                                   |      |      |      |      |   |   | 3 | LLTC[339]M[147]TIGFLFPMLSIAYLISPR          | 1         |   |
| TRPM3_HUMAN (Q9HCF6) Transient receptor potential cation channel subfamily M member 3 (Long transient receptor potential channel 3) (LTrpC3) (Melastatin-2) (MLSN2) [MASS=197529] | *    | 1.91 | *    | *    | * | 1 | 3 | WSISKHTQLSPTDAFGTIEFQGGGHSNKAM[147]YVR     | 1         |   |
| TRPS1_HUMAN (Q9UHF7) Zinc finger transcription factor Trps1 (Zinc finger protein GC79) (Tricho-rhino-phalangeal syndrome type I protein) [MASS=141520]                            | *    | 5.31 | *    | *    | * | 3 | 2 | NVASEGEGQILEPIGTESK                        | 1         |   |
|                                                                                                                                                                                   |      |      |      |      |   |   | 3 | EFSADQM[147]SENTDQSDAAELNHK                | 1         |   |
|                                                                                                                                                                                   |      |      |      |      |   |   | 3 | C[339]KFC[330]NFTYM[147]GNSSTELEQHFLQTHPNK | 1         |   |
| TRRAP_HUMAN (Q9Y4A5) Transformation/transcription domain-associated protein (350/400 kDa PCAF-associated factor) (PAF350/400) (STAF40) (Tra1 homolog) [MASS=437584]               | 0.00 | 0.78 | 0.42 | 0.00 | 1 | 2 | 2 | LLAYC[330]LLNYC[330]K                      | 1         |   |
|                                                                                                                                                                                   |      |      |      |      |   |   | 2 | LPEM[147]GSNVELSNLYLKLFK                   | 1         |   |
| TRYB1_HUMAN (Q15661) Tryptase beta-1 precursor (EC 3.4.21.59) (Tryptase-1) (Tryptase I) [MASS=30515]                                                                              | 0.00 | 2.91 | *    | *    | * | 1 | 1 | LPPPFPLK                                   | 1         |   |

|                                                                                                                                                                                                                                                            |      |       |      |      |   |   |   |                                     |   |
|------------------------------------------------------------------------------------------------------------------------------------------------------------------------------------------------------------------------------------------------------------|------|-------|------|------|---|---|---|-------------------------------------|---|
| TSH2_HUMAN (Q9NRE2) Teashirt homolog 2<br>(Zinc finger protein 218) (Ovarian cancer-<br>related protein 10-2) (OVC10-2)<br>[MASS=115004]                                                                                                                   | 0.00 | 2.90  | 2.69 | 0.00 | 1 | 2 | 3 | NC[330]DTRNGSNK                     | 1 |
|                                                                                                                                                                                                                                                            |      |       |      |      |   |   |   | C[339]M[147]FC[339]GDSFDSLQDLSVHMIK | 1 |
| TYPH_HUMAN (P19971) Thymidine<br>phosphorylase precursor (EC 2.4.2.4)<br>(TdRPase) (TP) (Platelet-derived endothelial<br>cell growth factor) (PD-ECGF) (Gliostatin)<br>[MASS=49955]                                                                        | 0.00 | 4.77  | 0.57 | 0.00 | 1 | 1 | 2 | MLAAQGVDPGLARALC[330]SGSPAER        | 1 |
| U3023_HUMAN (Q86Y78) Protein<br>UNQ3023/PRO9821 precursor [MASS=19118]                                                                                                                                                                                     | 0.00 | 11.11 | 0.53 | 0.00 | 1 | 1 | 2 | YC[330]YTQHTM[147]EVTGNSISVTK       | 1 |
| UBP28_HUMAN (Q96RU2) Ubiquitin carboxyl-<br>terminal hydrolase 28 (EC 3.1.2.15) (Ubiquitin<br>thioesterase 28) (Ubiquitin-specific-processing<br>protease 28) (Deubiquitinating enzyme 28)<br>[MASS=122490]                                                | 0.00 | 4.18  | 1.13 | 0.00 | 1 | 3 | 3 | EIGPDDMMN[147]EEYK                  | 1 |
|                                                                                                                                                                                                                                                            |      |       |      |      |   |   | 2 | C[330]EVWGENPNPNDWRR                | 1 |
|                                                                                                                                                                                                                                                            |      |       |      |      |   |   | 2 | RLVLSYSLPQNVLENC[330]R              | 1 |
| UBP33_HUMAN (Q8TEY7) Ubiquitin carboxyl-<br>terminal hydrolase 33 (EC 3.1.2.15) (Ubiquitin<br>thioesterase 33) (Ubiquitin-specific-processing<br>protease 33) (Deubiquitinating enzyme 33)<br>(VHL-interacting deubiquitinating enzyme 1)<br>[MASS=106752] | *    | 2.44  | *    | *    | * | 2 | 2 | MC[330]NKINKVNSEGEFDK               | 1 |
|                                                                                                                                                                                                                                                            |      |       |      |      |   |   | 1 | LSASPPK                             | 1 |
| UBP38_HUMAN (Q8NB14) Ubiquitin carboxyl-<br>terminal hydrolase 38 (EC 3.1.2.15) (Ubiquitin<br>thioesterase 38) (Ubiquitin-specific-processing<br>protease 38) (Deubiquitinating enzyme 38)<br>(HP43.8KD) [MASS=116545]                                     | *    | 0.58  | *    | *    | * | 1 | 1 | VQASHK                              | 1 |
| UBP4_HUMAN (Q13107) Ubiquitin carboxyl-<br>terminal hydrolase 4 (EC 3.1.2.15) (Ubiquitin<br>thioesterase 4) (Ubiquitin-specific-processing<br>protease 4) (Deubiquitinating enzyme 4)<br>(Ubiquitous nuclear protein homolog)<br>[MASS=108564]             | 0.00 | 1.56  | 0.02 | 0.00 | 1 | 1 | 2 | HKLTLESYQAVC[330]DR                 | 1 |

|                                                                                                                                                                                                                                  |      |       |      |      |    |   |   |                                       |   |
|----------------------------------------------------------------------------------------------------------------------------------------------------------------------------------------------------------------------------------|------|-------|------|------|----|---|---|---------------------------------------|---|
| UCHL1_HUMAN (P09936) Ubiquitin carboxyl-terminal hydrolase isozyme L1 (EC 3.4.19.12) (EC 6.-.-.-) (UCH-L1) (Ubiquitin thioesterase L1) (Neuron cytoplasmic protein 9.5) (PGP 9.5) (PGP9.5) [MASS=24824]                          | 1.00 | 17.94 | 0.86 | 0.05 | 2  | 2 | 1 | FSAVALC[339]K                         | 1 |
|                                                                                                                                                                                                                                  |      |       |      |      |    |   | 3 | QTIGNSC[330]GTIGLIHAVANNQDKLGFEDGSVLK | 1 |
|                                                                                                                                                                                                                                  |      |       |      |      |    |   |   |                                       |   |
| UCP4_HUMAN (O95847) Mitochondrial uncoupling protein 4 (UCP 4) (Solute carrier family 25 member 27) [MASS=36064]                                                                                                                 | *    | 3.41  | *    | *    | *  | 1 | 2 | LQM[147]QGEEAALAR                     | 1 |
|                                                                                                                                                                                                                                  |      |       |      |      |    |   | 2 | SHTEEDC[339]TEELFDLHAR                | 2 |
|                                                                                                                                                                                                                                  |      |       |      |      |    |   |   |                                       |   |
| UCRH_HUMAN (P07919) Ubiquinol-cytochrome c reductase complex 11 kDa protein, mitochondrial precursor (EC 1.10.2.2) (Mitochondrial hinge protein) (Cytochrome C1, nonheme 11 kDa protein) (Complex III subunit VIII) [MASS=10739] | 1.00 | 37.36 | 1.13 | 0.06 | 11 | 3 | 2 | SHTEEDC[330]TEELFDLHAR                | 1 |
|                                                                                                                                                                                                                                  |      |       |      |      |    |   | 3 | SHTEEDC[339]TEELFDLHAR                | 2 |
|                                                                                                                                                                                                                                  |      |       |      |      |    |   | 1 | DHC[339]VAHK                          | 1 |
|                                                                                                                                                                                                                                  |      |       |      |      |    |   | 2 | ERLELC[330]DER                        | 2 |
|                                                                                                                                                                                                                                  |      |       |      |      |    |   | 2 | ERLELC[339]DER                        | 3 |
|                                                                                                                                                                                                                                  |      |       |      |      |    |   |   |                                       |   |
| UHMK1_HUMAN (Q8TAS1) Serine/threonine-protein kinase Kist (EC 2.7.11.1) (Kinase interacting with stathmin) (U2AF homology motif kinase 1) [MASS=46546]                                                                           | 0.00 | 3.34  | 1.17 | 0.00 | 1  | 1 | 2 | MAGSGC[339]AWGAEPPR                   | 1 |
|                                                                                                                                                                                                                                  |      |       |      |      |    |   | 2 | NALVSHLDGTTTPVC[339]JEDIGR            | 3 |
| UQCR1_HUMAN (P31930) Ubiquinol-cytochrome-c reductase complex core protein I, mitochondrial precursor (EC 1.10.2.2) [MASS=52645]                                                                                                 | 1.00 | 7.71  | 1.29 | 0.05 | 6  | 3 | 2 | LC[339]TSATESEVAR                     | 1 |
|                                                                                                                                                                                                                                  |      |       |      |      |    |   | 1 | GKNILR                                | 1 |
|                                                                                                                                                                                                                                  |      |       |      |      |    |   | 2 | NALVSHLDGTTTPVC[330]JEDIGR            | 1 |
|                                                                                                                                                                                                                                  |      |       |      |      |    |   | 2 | LC[330]TSATESEVAR                     | 1 |
| UQCR2_HUMAN (P22695) Ubiquinol-cytochrome-c reductase complex core protein 2, mitochondrial precursor (EC 1.10.2.2) (Complex III subunit II) [MASS=48443]                                                                        | 1.00 | 5.30  | 1.28 | 0.07 | 4  | 2 | 2 | ENM[147]AYTVEC[339]LR                 | 1 |
|                                                                                                                                                                                                                                  |      |       |      |      |    |   | 2 | NALANPLYC[339]PDYR                    | 3 |

|                                                                                                                                                                                                                                   |      |       |      |      |   |   |   |                                        |   |
|-----------------------------------------------------------------------------------------------------------------------------------------------------------------------------------------------------------------------------------|------|-------|------|------|---|---|---|----------------------------------------|---|
| VA0D_HUMAN (P61421) Vacuolar ATP synthase subunit d (EC 3.6.3.14) (V-ATPase d subunit) (Vacuolar proton pump d subunit) (V-ATPase AC39 subunit) (V-ATPase 40 kDa accessory protein) (P39) (32 kDa accessory protein) [MASS=40329] | 0.00 | 1.99  | 1.20 | 0.00 | 1 | 1 | 2 | LFPHC[339]GR                           | 1 |
| VATA1_HUMAN (P38606) Vacuolar ATP synthase catalytic subunit A, ubiquitous isoform (EC 3.6.3.14) (V-ATPase subunit A 1) (Vacuolar proton pump alpha subunit 1) (V-ATPase 69 kDa subunit 1) (Isoform VA68) [MASS=68304]            | *    | 6.32  | *    | *    | * | 2 | 3 | LAEMPADSGYPAYLGAR                      | 1 |
|                                                                                                                                                                                                                                   |      |       |      |      |   |   | 3 | FC[330]PFYKTVGM[147]LSNMIAFYDMAR       | 1 |
| VATB1_HUMAN (P15313) Vacuolar ATP synthase subunit B, kidney isoform (EC 3.6.3.14) (V-ATPase B1 subunit) (Vacuolar proton pump B isoform 1) (Endomembrane proton pump 58 kDa subunit) [MASS=56980]                                | 1.00 | 11.31 | 1.35 | 0.00 | 2 | 5 | 3 | IPIFSAAGLPHNEIAAQIC[339]R              | 1 |
|                                                                                                                                                                                                                                   |      |       |      |      |   |   | 2 | IPIFSAAGLPHNEIAAQIC[339]R              | 1 |
|                                                                                                                                                                                                                                   |      |       |      |      |   |   | 1 | LMKSAIGEGM[147]TRK                     | 1 |
|                                                                                                                                                                                                                                   |      |       |      |      |   |   | 1 | QAGLVKK                                | 1 |
|                                                                                                                                                                                                                                   |      |       |      |      |   |   | 2 | LM[147]KSAIGEGM[147]TR                 | 1 |
|                                                                                                                                                                                                                                   |      |       |      |      |   |   | 1 | DVQAM[147]K                            | 1 |
| VAV2_HUMAN (P52735) Protein vav-2 [MASS=101256]                                                                                                                                                                                   | *    | 2.51  | *    | *    | * | 1 | 3 | M[147]FLRGTIFYQGYMC[330]TKC[330]GVGAHK | 1 |
| VDAC1_HUMAN (P21796) Voltage-dependent anion-selective channel protein 1 (VDAC-1) (hVDAC1) (Outer mitochondrial membrane protein porin 1) (Plasmalemmal porin) (Porin 31HL) (Porin 31HM) [MASS=30641]                             | 1.00 | 4.26  | 2.16 | 0.11 | 3 | 1 | 2 | YQIDPDAC[339]FSAK                      | 1 |
|                                                                                                                                                                                                                                   |      |       |      |      |   |   | 1 | YQIDPDAC[339]FSAK                      | 1 |
|                                                                                                                                                                                                                                   |      |       |      |      |   |   | 1 | YQIDPDAC[330]FSAK                      | 1 |
| VDAC2_HUMAN (P45880) Voltage-dependent anion-selective channel protein 2 (VDAC-2) (hVDAC2) (Outer mitochondrial membrane protein porin 2) [MASS=38092]                                                                            | 1.00 | 8.65  | 1.19 | 0.06 | 2 | 2 | 2 | SC[339]SGVEFSTSGSSNTDTGK               | 1 |
|                                                                                                                                                                                                                                   |      |       |      |      |   |   | 2 | WC[330]EYGLTFTEK                       | 1 |
| VDAC3_HUMAN (Q9Y277) Voltage-dependent anion-selective channel protein 3 (VDAC-3) (hVDAC3) (Outer mitochondrial membrane protein porin 3) [MASS=30658]                                                                            | 0.99 | 15.90 | 4.60 | 0.00 | 1 | 2 | 3 | LSQNNFALGYKAADFQLHTHVNDGTEFGGSIYQK     | 1 |
|                                                                                                                                                                                                                                   |      |       |      |      |   |   | 2 | VC[330]NYGLTFTQK                       | 1 |
| VISL1_HUMAN (P62760) Visinin-like protein 1 (VILIP) (Hippocalcin-like protein 3) (HLP3) [MASS=22011]                                                                                                                              | 0.69 | 10.00 | 1.11 | 0.00 | 1 | 2 | 2 | GFLKDC[330]PSGR                        | 1 |
|                                                                                                                                                                                                                                   |      |       |      |      |   |   | 2 | M[147]VGTVM[147]MK                     | 1 |

|                                                                                                                                                                                                                                                                             |      |       |      |      |   |   |             |                                                                                                                                            |             |
|-----------------------------------------------------------------------------------------------------------------------------------------------------------------------------------------------------------------------------------------------------------------------------|------|-------|------|------|---|---|-------------|--------------------------------------------------------------------------------------------------------------------------------------------|-------------|
| VPP1_HUMAN (Q93050) Vacuolar proton translocating ATPase 116 kDa subunit a isoform 1 (V-ATPase 116 kDa isoform a1) (Clathrin-coated vesicle/synaptic vesicle proton pump 116 kDa subunit) (Vacuolar proton pump subunit 1) (Vacuolar adenosine triphosphatase [MASS=96412]) | *    | 3.82  | *    | *    | * | 2 | 1<br>3      | VRKM[147]K<br>MKMSVILGIIHMLFGVSLSLFNHIYFK                                                                                                  | 1<br>1      |
| VPS29_HUMAN (Q9UBQ0) Vacuolar protein sorting 29 (Vesicle protein sorting 29) (hVPS29) (PEP11) [MASS=20506]                                                                                                                                                                 | 0.93 | 7.14  | 0.89 | 0.00 | 1 | 1 | 2           | IQHILC[339]TGNLC[339]TK                                                                                                                    | 1           |
| VPS4B_HUMAN (O75351) Vacuolar sorting protein 4b (SKD1 protein) [MASS=49302]                                                                                                                                                                                                | 0.00 | 4.28  | 1.57 | 0.00 | 1 | 1 | 3           | ENKPSIIFIDEIDSLC[339]GSR                                                                                                                   | 1           |
| VWF_HUMAN (P04275) Von Willebrand factor precursor (vWF) [Contains: Von Willebrand antigen II] [MASS=309298]                                                                                                                                                                | *    | 2.67  | *    | *    | * | 3 | 3<br>2<br>3 | TC[330]QNYDLEC[339]M[147]SMGC[330]VSGC[330]LC[330]PPGM[147]VR<br>C[330]LPSAC[330]EVVTGSPRGDSQSSWK<br>M[147]IPARFAGVLLALALILPGTLC[339]AEGTR | 1<br>1<br>1 |
| WAPL_HUMAN (Q7Z5K2) Wings apart-like protein homolog (Friend of EBNA2 protein) [MASS=132945]                                                                                                                                                                                | 0.00 | 0.59  | 5.52 | 0.00 | 1 | 1 | 2           | C[339]AMPSFR                                                                                                                               | 1           |
| WDR19_HUMAN (Q8NEZ3) WD repeat protein 19 [MASS=151580]                                                                                                                                                                                                                     | *    | 2.31  | *    | *    | * | 2 | 2<br>3      | VYTYVFHK<br>IPSEMATNLMILHSYILVKIHVK                                                                                                        | 2<br>1      |
| WFDC6_HUMAN (Q9BQY6) WAP four-disulfide core domain protein 6 precursor (Putative protease inhibitor WAP6) [MASS=14626]                                                                                                                                                     | 0.00 | 33.59 | *    | *    | * | 2 | 3<br>2<br>3 | IC[339]SEFIYGGSQGNNNNFQTEAIC[330]LVTC[330]K<br>RLAPAWPPYHTGGTIK<br>IC[339]SEFIYGGSQGNNNNFQTEAIC[330]LVTC[339]K                             | 1<br>1<br>1 |
| WISP3_HUMAN (O95389) WNT1-inducible signaling pathway protein 3 precursor (WISP-3) [MASS=39293]                                                                                                                                                                             | 0.00 | 7.63  | 0.33 | 0.00 | 1 | 2 | 3<br>2      | QPGEIC[330]NEADLC[330]DPHK<br>PRC[339]PPGVSLVR                                                                                             | 1<br>1      |
| WWP1_HUMAN (Q9H0M0) NEDD4-like E3 ubiquitin-protein ligase WWP1 (EC 6.3.2.-) (WW domain-containing protein 1) (Atropin-1-interacting protein 5) (AIP5) [MASS=105201]                                                                                                        | 0.00 | 3.15  | 1.00 | 0.00 | 1 | 1 | 3           | MRLQLFVTGTC[330]RLPLGGFAELMGSNPQK                                                                                                          | 1           |
| XDH_HUMAN (P47989) Xanthine dehydrogenase/oxidase [Includes: Xanthine dehydrogenase (EC 1.17.1.4) (XD); Xanthine oxidase (EC 1.17.3.2) (XO) (Xanthine oxidoreductase)] [MASS=146292]                                                                                        | *    | 1.28  | *    | *    | * | 1 | 2           | VVEKNADPETLLAYLR                                                                                                                           | 1           |

|                                                                                                                                                                                                                                 |      |      |      |      |   |   |   |                                           |   |
|---------------------------------------------------------------------------------------------------------------------------------------------------------------------------------------------------------------------------------|------|------|------|------|---|---|---|-------------------------------------------|---|
| XPP2_HUMAN (O43895) Xaa-Pro aminopeptidase 2 precursor (EC 3.4.11.9) (X-Pro aminopeptidase 2) (Membrane-bound aminopeptidase P) (Membrane-bound APP) (Membrane-bound AmP) (mAmP) (Aminoacylproline aminopeptidase) [MASS=75624] | 0.00 | 6.82 | 0.22 | 0.00 | 1 | 3 | 2 | EKLVTDITYSPVM[147]JMTK                    | 1 |
|                                                                                                                                                                                                                                 |      |      |      |      |   |   | 1 | M[147]VEAFAR                              | 1 |
|                                                                                                                                                                                                                                 |      |      |      |      |   |   | 2 | NC[330]STNPPYLPVTVVNTTM[147]SLTALR        | 1 |
| YLPM1_HUMAN (P49750) YLP motif-containing protein 1 (Nuclear protein ZAP3) (ZAP113) [MASS=219984]                                                                                                                               | *    | 1.28 | *    | *    | * | 1 | 3 | EQLQKM[147]KDFGSEPMADHLPQESR              | 1 |
| ZBT17_HUMAN (Q13105) Zinc finger and BTB domain-containing protein 17 (Zinc finger protein 151) (Myc-interacting zinc finger protein) (Miz-1 protein) [MASS=87927]                                                              | 0.00 | 1.49 | 1.05 | 0.00 | 1 | 1 | 2 | QHTGEKPYVC[339]ER                         | 1 |
| ZBT40_HUMAN (Q9NUA8) Zinc finger and BTB domain-containing protein 40 [MASS=138118]                                                                                                                                             | 0.00 | 3.95 | 1.02 | 0.00 | 1 | 3 | 3 | QANGLSIHLHTFHNIEDPYDC[339]KK              | 1 |
|                                                                                                                                                                                                                                 |      |      |      |      |   |   | 1 | ILGKVR                                    | 1 |
|                                                                                                                                                                                                                                 |      |      |      |      |   |   | 3 | EYHPC[330]PTC[339]GKIFSAPMLER             | 1 |
| ZCHC6_HUMAN (Q5VYS8) Zinc finger CCHC domain-containing protein 6 [MASS=171228]                                                                                                                                                 | *    | 2.21 | *    | *    | * | 2 | 2 | VYHPETGRKNEK                              | 1 |
|                                                                                                                                                                                                                                 |      |      |      |      |   |   | 2 | EC[339]PQFKGSSGSLSSKYMTQGK                | 1 |
| ZFP14_HUMAN (Q9HCL3) Zinc finger protein 14 homolog (Zfp-14) [MASS=63463]                                                                                                                                                       | 0.00 | 3.94 | 1.79 | 0.00 | 1 | 1 | 3 | LLSQLTQHQSHTGEKPYEC[339]K                 | 1 |
| ZFP1_HUMAN (Q6P2D0) Zinc finger protein 1 homolog (Zfp-1) [MASS=47516]                                                                                                                                                          | 0.00 | 5.16 | 0.17 | 1.81 | 4 | 1 | 3 | SYAGQTDEC[330]NEFGKALLYLK                 | 4 |
| ZFY28_HUMAN (Q9HCC9) Zinc finger FYVE domain-containing protein 28 [MASS=96500]                                                                                                                                                 | *    | 8.46 | *    | *    | * | 3 | 3 | EEDLSNNNLEAEGTDGASLAGTSSC[339]SC[330]LDSR | 1 |
|                                                                                                                                                                                                                                 |      |      |      |      |   |   | 3 | C[339]SPGGVIGASYAAGLAKASDR                | 1 |
|                                                                                                                                                                                                                                 |      |      |      |      |   |   | 3 | EKC[330]SPGGVIGASYAAGLAKASDR              | 3 |
| ZFYV1_HUMAN (Q9HBF4) Zinc finger FYVE domain-containing protein 1 (Double FYVE-containing protein 1) (Tandem FYVE fingers-1) (SR3) [MASS=87175]                                                                                 | 0.00 | 2.70 | 0.89 | 0.00 | 1 | 1 | 3 | DAARPAYWVPDHEILHC[330]HNC[330]R           | 1 |
| ZMYM3_HUMAN (Q14202) Zinc finger MYM-type protein 3 (Zinc finger protein 261) (DXS6673E protein) [MASS=152378]                                                                                                                  | *    | 2.41 | *    | *    | * | 2 | 2 | RLVLESEC[330]SR                           | 1 |
|                                                                                                                                                                                                                                 |      |      |      |      |   |   | 2 | FFGLQTAEEHMQLSFTNVVRQSR                   | 1 |
| ZN197_HUMAN (O14709) Zinc finger protein 197 (ZnF20) [MASS=118847]                                                                                                                                                              | *    | 1.07 | *    | *    | * | 1 | 3 | C[330]NDC[330]GKVFYSYR                    | 1 |



|                                                                                                                                                                                                      |      |      |      |      |   |   |   |                                     |   |
|------------------------------------------------------------------------------------------------------------------------------------------------------------------------------------------------------|------|------|------|------|---|---|---|-------------------------------------|---|
| ZN236_HUMAN (Q9UL36) Zinc finger protein 236 [MASS=203659]                                                                                                                                           | *    | 1.03 | *    | *    | * | 2 | 3 | EFRKPSDLVR                          | 1 |
|                                                                                                                                                                                                      |      |      |      |      |   |   | 1 | HM[147]ATHMSMK                      | 1 |
| ZN397_HUMAN (Q8NF99) Zinc finger protein 397 (Zinc finger and SCAN domain-containing protein 15) [MASS=61139]                                                                                        | 0.23 | 1.69 | 1.05 | 0.00 | 1 | 1 | 2 | IHTGEKAC[339]K                      | 1 |
| ZN407_HUMAN (Q9C0G0) Zinc finger protein 407 (Fragment) [MASS=126979]                                                                                                                                | *    | 1.80 | *    | *    | * | 1 | 2 | MVQGVLQFAVC[330]DTAAAGQLVK          | 1 |
| ZN462_HUMAN (Q96JM2) Zinc finger protein 462 [MASS=161529]                                                                                                                                           | *    | 3.40 | *    | *    | * | 3 | 2 | C[330]PLC[339]LYHTK                 | 1 |
|                                                                                                                                                                                                      |      |      |      |      |   |   | 2 | AADFAQDIDINPGAVYKC[339]R            | 1 |
|                                                                                                                                                                                                      |      |      |      |      |   |   | 3 | DGPPVENEM[147]FFC[339]QHC[339]DYGNR | 1 |
| ZN497_HUMAN (Q6ZNH5) Zinc finger protein 497 [MASS=54712]                                                                                                                                            | *    | 4.22 | *    | *    | * | 1 | 3 | PYEC[330]PEC[339]GKAFSWNSNFLEHR     | 1 |
|                                                                                                                                                                                                      |      |      |      |      |   |   | 3 | EPC[339]VWARDVTGR                   | 6 |
| ZN540_HUMAN (Q8NDQ6) Zinc finger protein 540 [MASS=77093]                                                                                                                                            | *    | 1.82 | *    | *    | * | 1 |   |                                     |   |
| ZN638_HUMAN (Q14966) Zinc finger protein 638 (Nuclear protein 220) (Zinc-finger matrin-like protein) (Cutaneous T-cell lymphoma-associated antigen se33-1) (CTCL tumor antigen se33-1) [MASS=220623] | *    | 1.77 | *    | *    | * | 3 | 1 | QKHLEAADK                           | 1 |
|                                                                                                                                                                                                      |      |      |      |      |   |   | 2 | GYSVEEVYDLAKPFGGLK                  | 1 |
|                                                                                                                                                                                                      |      |      |      |      |   |   | 2 | FSHADAQK                            | 1 |
| ZN690_HUMAN (Q8IWY8) Zinc finger protein 690 [MASS=96587]                                                                                                                                            | 0.00 | 1.88 | 0.68 | 0.00 | 1 | 1 | 3 | RIHTGERPHVC[330]PDC[330]GK          | 1 |
| ZN759_HUMAN (Q8NAF0) Zinc finger protein 579 [MASS=60479]                                                                                                                                            | 0.23 | 8.01 | 1.62 | 0.00 | 1 | 3 | 2 | PEGEQEEGEGPPPR                      | 1 |
|                                                                                                                                                                                                      |      |      |      |      |   |   | 2 | GHGPQPPLRC[330]AAC[330]PR           | 2 |
|                                                                                                                                                                                                      |      |      |      |      |   |   | 2 | HAQVHAGGPAPHPC[339]PR               | 1 |
| ZNT3_HUMAN (Q99726) Zinc transporter 3 (ZnT-3) (Solute carrier family 30 member 3) [MASS=41944]                                                                                                      | 0.00 | 6.96 | 0.77 | 0.11 | 2 | 1 | 3 | AADPISTFLFSIC[330]ALGSTAPTLRDVLR    | 2 |

## Table 12. LAD Mitochondrial Study

### Experiment 2

A = Protein Score  
B = Percent Coverage  
C = XPress H2L Ratio  
D = XPress Std. Dev.

E = XPress Peptides  
F = Unique Peptides  
G = Charge  
H = Instances

| Description                                                                                                                                                                                                                                                          | A    | B    | C    | D    | E | F | G | Peptide Sequence              | H |
|----------------------------------------------------------------------------------------------------------------------------------------------------------------------------------------------------------------------------------------------------------------------|------|------|------|------|---|---|---|-------------------------------|---|
| 1433F_HUMAN (Q04917) 14-3-3 protein eta (Protein AS1) [MASS=28087]                                                                                                                                                                                                   | *    | 3.67 | *    | *    | * | 1 | 2 | YDDM[147]ASAMK                | 1 |
| 1433G_HUMAN (P61981) 14-3-3 protein gamma (Protein kinase C inhibitor protein 1) (KCIP-1) [MASS=28171]                                                                                                                                                               | 1.00 | 7.72 | 1.08 | 0.09 | 3 | 1 | 2 | ELEAVC[339]QDVLSLLDNYLIK      | 2 |
|                                                                                                                                                                                                                                                                      |      |      |      |      |   |   | 2 | ELEAVC[330]QDVLSLLDNYLIK      | 1 |
| 1433T_HUMAN (P27348) 14-3-3 protein theta (14-3-3 protein tau) (14-3-3 protein T-cell) (HS1 protein) [MASS=27764]                                                                                                                                                    | 0.98 | 9.80 | 0.92 | 0.00 | 1 | 1 | 3 | SIC[339]TTVLELLDKYLIANATNPESK | 1 |
| 1433Z_HUMAN (P63104) 14-3-3 protein zeta/delta (Protein kinase C inhibitor protein 1) (KCIP-1) [MASS=27745]                                                                                                                                                          | 0.71 | 4.90 | 1.18 | 0.00 | 1 | 1 | 2 | DIC[339]NDVLSLLEK             | 1 |
| 2AAA_HUMAN (P30153) Serine/threonine-protein phosphatase 2A 65 kDa regulatory subunit A alpha isoform (PP2A, subunit A, PR65-alpha isoform) (PP2A, subunit A, R1-alpha isoform) (Medium tumor antigen-associated 61 kDa protein) [MASS=65092]                        | 0.99 | 4.93 | 1.00 | 0.00 | 1 | 2 | 1 | LGEFAK                        | 1 |
|                                                                                                                                                                                                                                                                      |      |      |      |      |   |   | 3 | DNTIEHLLPLFLAQLKDEC[339]PEVR  | 1 |
| 2ABA_HUMAN (P63151) Serine/threonine-protein phosphatase 2A 55 kDa regulatory subunit B alpha isoform (PP2A, subunit B, B-alpha isoform) (PP2A, subunit B, B55-alpha isoform) (PP2A, subunit B, PR55-alpha isoform) (PP2A, subunit B, R2-alpha isoform) [MASS=51692] | *    | 2.68 | *    | *    | * | 1 | 2 | LC[339]DMRASALC[330]DR        | 1 |
| 3BHS7_HUMAN (Q9H2F3) 3 beta-hydroxysteroid dehydrogenase type 7 (3 beta-hydroxysteroid dehydrogenase type VII) (3Beta-HSD VII) (3-beta-hydroxy-delta(5)-C27 steroid oxidoreductase) (EC 1.1.1.-) (C(27) 3beta-HSD) [MASS=41016]                                      | 0.00 | 3.25 | 2.68 | 0.00 | 1 | 1 | 2 | NVIEAC[339]VQTGTR             | 1 |

|                                                                                                                                                                                                                 |      |       |      |      |    |   |                       |                                                                                                                                                  |                            |
|-----------------------------------------------------------------------------------------------------------------------------------------------------------------------------------------------------------------|------|-------|------|------|----|---|-----------------------|--------------------------------------------------------------------------------------------------------------------------------------------------|----------------------------|
| 5NT1B_HUMAN (Q96P26) Cytosolic 5'-nucleotidase 1B (EC 3.1.3.5) (Cytosolic 5'-nucleotidase 1B) (cN1B) (cN-IB) (Autoimmune infertility-related protein) [MASS=68803]                                              | 0.00 | 3.44  | 0.20 | 0.00 | 1  | 2 | 1<br>3                | GFLEDLGRLLQK<br>DMAYC[330]DTQLR                                                                                                                  | 1<br>3                     |
| 5NTC_HUMAN (P49902) Cytosolic purine 5'-nucleotidase (EC 3.1.3.5) (5'-nucleotidase cytosolic II) [MASS=64969]                                                                                                   | *    | 3.92  | *    | *    | *  | 1 | 3                     | KVTHDM[147]DMC[330]YGM[147]MGSLFRSGSR                                                                                                            | 1                          |
| AAAS_HUMAN (Q9NRG9) Aladin (Adracalin) [MASS=59574]                                                                                                                                                             | 0.00 | 2.38  | 0.61 | 0.00 | 1  | 1 | 3                     | MC[330]SLGLFPPPPPR                                                                                                                               | 1                          |
|                                                                                                                                                                                                                 |      |       |      |      |    |   | 2                     | VGAFTMVC[339]K                                                                                                                                   | 1                          |
|                                                                                                                                                                                                                 |      |       |      |      |    |   | 2                     | NLDKEYLPIGGLAEFC[339]K                                                                                                                           | 2                          |
| AATM_HUMAN (P00505) Aspartate aminotransferase, mitochondrial precursor (EC 2.6.1.1) (Transaminase A) (Glutamate oxaloacetate transaminase 2) [MASS=47475]                                                      | 1.00 | 13.49 | 1.38 | 0.12 | 11 | 4 | 1<br>2<br>2<br>3<br>2 | VGAFTMVC[330]K<br>HFIEQGINVC[330]LC[330]QSYAK<br>NLDKEYLPIGGLAEFC[330]K<br>VGAFTM[147]VC[339]K<br>NLDKEYLPIGGLAEFC[339]K<br>TC[339]GDFDTGAVEDISK | 1<br>1<br>1<br>1<br>1<br>3 |
| ABCB6_HUMAN (Q9NP58) ATP-binding cassette sub-family B member 6, mitochondrial precursor (Mitochondrial ABC transporter 3) (Mt-ABC transporter 3) (ABC transporter umat) [MASS=93885]                           | 0.00 | 3.21  | 1.50 | 0.00 | 1  | 1 | 3                     | VC[339]ANRTTIVVAHRLSTVVNADQILVIK                                                                                                                 | 1                          |
| ABCBB_HUMAN (O95342) Bile salt export pump (ATP-binding cassette sub-family B member 11) [MASS=146392]                                                                                                          | 0.00 | 1.06  | 0.22 | 0.00 | 1  | 1 | 2                     | M[147]TSTIC[330]GFLLGFFR                                                                                                                         | 1                          |
| ABL1_HUMAN (P00519) Proto-oncogene tyrosine-protein kinase ABL1 (EC 2.7.10.2) (p150) (c-ABL) (Abelson murine leukemia viral oncogene homolog 1) [MASS=122872]                                                   | 0.00 | 1.77  | 1.05 | 0.00 | 1  | 2 | 3<br>1                | HPNLVQLLGVC[339]TR<br>TAPTPPK                                                                                                                    | 1<br>1                     |
| ACAD8_HUMAN (Q9UKU7) Acyl-CoA dehydrogenase family member 8, mitochondrial precursor (EC 1.3.99.-) (ACAD-8) (Isobutyryl-CoA dehydrogenase) (Activator-recruited cofactor 42 kDa component) (ARC42) [MASS=45070] | 0.00 | 6.51  | 1.16 | 0.00 | 1  | 1 | 3                     | AVIFEDC[339]AVPVANRIGSEGQGFLIAVR                                                                                                                 | 1                          |

|                                                                                                                                                                                                                                                                         |      |       |      |      |   |   |                                                                                                                                                       |                       |
|-------------------------------------------------------------------------------------------------------------------------------------------------------------------------------------------------------------------------------------------------------------------------|------|-------|------|------|---|---|-------------------------------------------------------------------------------------------------------------------------------------------------------|-----------------------|
| ACADS_HUMAN (P16219) Short-chain specific acyl-CoA dehydrogenase, mitochondrial precursor (EC 1.3.99.2) (SCAD) (Butyryl-CoA dehydrogenase) [MASS=44297]                                                                                                                 | 0.00 | 9.71  | 1.09 | 0.00 | 1 | 2 | 3 IGIASQALGIAQTALDC[339]AVNYAENR<br>3 IPKDSILGEPGM[147]GFK                                                                                            | 1<br>6                |
| ACL7A_HUMAN (Q9Y615) Actin-like protein 7A (Actin-like-7-alpha) (Actin-like 7A) [MASS=48644]                                                                                                                                                                            | 0.00 | 5.06  | 7.16 | 0.00 | 1 | 1 | 3 RDLMGNILLC[339]GGSTMLSGFPNR                                                                                                                         | 1                     |
| ACON_HUMAN (Q99798) Aconitate hydratase, mitochondrial precursor (EC 4.2.1.3) (Citrate hydro-lyase) (Aconitase) [MASS=85425]                                                                                                                                            | 1.00 | 6.67  | 1.28 | 0.06 | 3 | 3 | 2 VGLIGSC[339]TNSSYEDM[147]GR<br>2 C[339]TTDHISAAGPWLK<br>2 VAVPSTIHC[339]DHLIEAQVGGEK                                                                | 1<br>1<br>1           |
| ACPM_HUMAN (O14561) Acyl carrier protein, mitochondrial precursor (ACP) (NADH-ubiquinone oxidoreductase 9.6 kDa subunit) (Cl-SDAP) [MASS=17417]                                                                                                                         | 1.00 | 21.79 | 1.45 | 0.15 | 5 | 2 | 3 LMC[339]PQEIVDYIADKK<br>3 LM[147]C[330]PQEIVDYIADKK<br>3 LMC[330]PQEIVDYIADKKDVYE<br>3 LM[147]C[339]PQEIVDYIADKK<br>3 LM[147]C[339]PQEIVDYIADKKDVYE | 1<br>1<br>1<br>1<br>1 |
| ACTB_HUMAN (P60709) Actin, cytoplasmic 1 (Beta-actin) [MASS=41736]                                                                                                                                                                                                      | 1.00 | 9.33  | 1.09 | 0.10 | 4 | 2 | 2 C[330]DVDIRK<br>2 C[339]DVDIRK<br>3 C[339]PEALFQPSFLGMESC[339]GIHETTFNSIMK<br>3 C[330]PEALFQPSFLGM[147]ESC[330]GIHETTFNSIMK                         | 1<br>1<br>1<br>1      |
| ACTN4_HUMAN (O43707) Alpha-actinin-4 (Non-muscle alpha-actinin 4) (F-actin cross linking protein) [MASS=104853]                                                                                                                                                         | 0.00 | 7.57  | 3.72 | 0.00 | 1 | 3 | 3 IAESNHKLSGSNPYTTVTPQIINSK<br>3 AC[339]LISLGYDVENDR<br>3 M[147]APYQGPDAVPGALDYKSFSTALYGESDL                                                          | 1<br>1<br>1           |
| ADPPT_HUMAN (Q9NRN7) L-aminoadipate-semialdehyde dehydrogenase-phosphopantetheinyl transferase (EC 2.7.8.-) (4'-phosphopantetheinyl transferase) (Alpha-aminoadipic semialdehyde dehydrogenase-phosphopantetheinyl transferase) (AASD-PPT) (LYS5 ortholog) [MASS=35776] | *    | 4.21  | *    | *    | * | 1 | 3 DAKAAMAGRLM[147]JIR                                                                                                                                 | 1                     |

|                                                                                                                                                                                                                                |      |       |      |      |    |   |  |   |                                              |   |
|--------------------------------------------------------------------------------------------------------------------------------------------------------------------------------------------------------------------------------|------|-------|------|------|----|---|--|---|----------------------------------------------|---|
|                                                                                                                                                                                                                                |      |       |      |      |    |   |  | 1 | VKLLQVQHASK                                  | 1 |
|                                                                                                                                                                                                                                |      |       |      |      |    |   |  | 2 | YFAGNLASGGAAGATSLC[330]FVYPLDFAR             | 3 |
|                                                                                                                                                                                                                                |      |       |      |      |    |   |  | 2 | GAAQREFHGLGDC[339]IHK                        | 1 |
|                                                                                                                                                                                                                                |      |       |      |      |    |   |  | 2 | VKLLQVQHASK                                  | 1 |
|                                                                                                                                                                                                                                |      |       |      |      |    |   |  | 2 | EFHGLGDC[339]IHK                             | 1 |
|                                                                                                                                                                                                                                |      |       |      |      |    |   |  | 2 | GADIM[147]YGTVDVC[339]WR                     | 1 |
|                                                                                                                                                                                                                                |      |       |      |      |    |   |  | 2 | YFAGNLASGGAAGATSLC[339]FVYPLDFAR             | 4 |
| ADT1_HUMAN (P12235) ADP/ATP translocase 1 (Adenine nucleotide translocator 1) (ANT 1) (ADP,ATP carrier protein 1) (Solute carrier family 25 member 4) (ADP,ATP carrier protein, heart/skeletal muscle isoform T1) [MASS=32933] | 1.00 | 26.94 | 1.21 | 0.10 | 15 | 5 |  |   |                                              |   |
|                                                                                                                                                                                                                                |      |       |      |      |    |   |  | 2 | EFHGLGDC[330]IHK                             | 1 |
|                                                                                                                                                                                                                                |      |       |      |      |    |   |  | 1 | EFHGLGDC[330]IHK                             | 1 |
|                                                                                                                                                                                                                                |      |       |      |      |    |   |  | 3 | YFAGNLASGGAAGATSLC[339]FVYPLDFAR             | 2 |
|                                                                                                                                                                                                                                |      |       |      |      |    |   |  | 3 | YFAGNLASGGAAGATSLC[330]FVYPLDFAR             | 2 |
| ADT2_HUMAN (P05141) ADP/ATP translocase 2 (Adenine nucleotide translocator 2) (ANT 2) (ADP,ATP carrier protein 2) (Solute carrier family 25 member 5) (ADP,ATP carrier protein, fibroblast isoform) [MASS=32764]               | 0.00 | 9.09  | *    | *    | *  | 2 |  | 1 | GLGDC[330]LVK                                | 2 |
|                                                                                                                                                                                                                                |      |       |      |      |    |   |  | 3 | LLLQVQHASKQITADKQYK                          | 1 |
| ADT3_HUMAN (P12236) ADP/ATP translocase 3 (Adenine nucleotide translocator 2) (ANT 3) (ADP,ATP carrier protein 3) (Solute carrier family 25 member 6) (ADP,ATP carrier protein, isoform T2) [MASS=32735]                       | 0.00 | 7.07  | *    | *    | *  | 1 |  | 2 | DFLAGGIAAAISKTAVAPIER                        | 1 |
| AFF2_HUMAN (P51816) AF4/FMR2 family member 2 (Fragile X mental retardation 2 protein) (Protein FMR-2) (FMR2P) (Protein Ox19) (Fragile X E mental retardation syndrome protein) [MASS=144739]                                   | 0.00 | 3.36  | 3.71 | 0.00 | 1  | 2 |  | 3 | SFIC[339]GPNETPMETISLPPPIIQPM[147]EVQM[147]K | 1 |
|                                                                                                                                                                                                                                |      |       |      |      |    |   |  | 2 | DHAM[147]KYSRSLMEYFK                         | 1 |
| AFG32_HUMAN (Q9Y4W6) AFG3-like protein 2 (EC 3.4.24.-) (Paraplegin-like protein) [MASS=88483]                                                                                                                                  | *    | 1.88  | *    | *    | *  | 1 |  | 3 | IPKGAILTGPPGTGK                              | 1 |
| AGRN_HUMAN (O00468) Agrin precursor [MASS=214888]                                                                                                                                                                              | *    | 2.74  | *    | *    | *  | 2 |  | 3 | PVC[339]AQDGRTYDSDC[330]WRQQAEC[330]R        | 1 |
|                                                                                                                                                                                                                                |      |       |      |      |    |   |  | 3 | VGDGPRVLGESPVPHTVLNLKEPLYVGGAPDFSK           | 1 |

|                                                                                                                                                                                                                                                                              |      |       |      |      |   |   |                  |                                                                                                                                        |                  |
|------------------------------------------------------------------------------------------------------------------------------------------------------------------------------------------------------------------------------------------------------------------------------|------|-------|------|------|---|---|------------------|----------------------------------------------------------------------------------------------------------------------------------------|------------------|
| AK1C1_HUMAN (Q04828) Aldo-keto reductase family 1 member C1 (EC 1.1.1.-) (20-alpha-hydroxysteroid dehydrogenase) (EC 1.1.1.149) (20-alpha-HSD) (Trans-1,2-dihydrobenzene-1,2-diol dehydrogenase) (EC 1.3.1.20) (High-affinity hepatic bile acid-binding protei [MASS=36788]  | *    | 4.02  | *    | *    | * | 1 | 2                | PGEEVIPKDENGK                                                                                                                          | 1                |
| AKAP9_HUMAN (Q99996) A-kinase anchor protein 9 (Protein kinase A-anchoring protein 9) (PRKA9) (A-kinase anchor protein 450 kDa) (AKAP 450) (A-kinase anchor protein 350 kDa) (AKAP 350) (hgAKAP 350) (AKAP 120-like protein) (Protein hyperion) (Protein yotia [MASS=453664] | 0.23 | 2.10  | 1.37 | 0.00 | 1 | 4 | 2<br>3<br>2<br>3 | EYM[147]ENEKDKALC[330]SLK<br>QSQM[147]LEM[147]QVELSSM[147]KDRATELQEQLSSEK<br>IQEQGVEYQAAM[147]EC[339]LQK<br>GEM[147]ENALRSYSNITVNEDQIK | 1<br>1<br>1<br>1 |
| AL7A1_HUMAN (P49419) Aldehyde dehydrogenase family 7 member A1 (EC 1.2.1.3) (Antiquitin-1) [MASS=55235]                                                                                                                                                                      | 0.00 | 4.71  | 1.44 | 0.00 | 1 | 2 | 3<br>2           | KEGGTVVYGGKVM[147]DR<br>STC[330]TINYSK                                                                                                 | 1<br>1           |
| ALBU_HUMAN (P02768) Serum albumin precursor [MASS=69366]                                                                                                                                                                                                                     | *    | 1.64  | *    | *    | * | 1 | 2                | C[330]C[339]TESLVNRR                                                                                                                   | 1                |
| ALDH2_HUMAN (P05091) Aldehyde dehydrogenase, mitochondrial precursor (EC 1.2.1.3) (ALDH class 2) (ALDHI) (ALDH-E2) [MASS=56381]                                                                                                                                              | 0.98 | 2.13  | 1.26 | 0.00 | 1 | 1 | 2                | LLC[339]GGGIAADR                                                                                                                       | 1                |
| ALDOA_HUMAN (P04075) Fructose-bisphosphate aldolase A (EC 4.1.2.13) (Muscle-type aldolase) (Lung cancer antigen NY-LU-1) [MASS=39289]                                                                                                                                        | 0.95 | 12.67 | 1.11 | 0.00 | 1 | 2 | 3<br>3           | VNPC[330]IGGVILFHETLYQK<br>YASIC[339]QQNGIVPIVEPEILPDGDHDLKR                                                                           | 1<br>1           |
| AN30A_HUMAN (Q9BXX3) Ankyrin repeat domain-containing protein 30A (NY-BR-1 antigen) [MASS=152673]                                                                                                                                                                            | 0.00 | 2.24  | 0.03 | 0.00 | 1 | 3 | 1<br>1<br>2      | EIM[147]SPAK<br>DVC[330]LPKATHQK<br>KTINLNIQDAQK                                                                                       | 1<br>1<br>1      |
| ANGL1_HUMAN (O95841) Angiotensin-converting enzyme-related protein 1 precursor (Angiotensin-converting enzyme-like 1) (Angiotensin-converting enzyme-3) (ANG-3) [MASS=56719]                                                                                                 | *    | 5.09  | *    | *    | * | 1 | 3                | HQDGIFWAEYRGGSYSLRAVQMM[147]IK                                                                                                         | 1                |
| ANK1_HUMAN (P16157) Ankyrin-1 (Erythrocyte ankyrin) (Ankyrin-R) [MASS=206144]                                                                                                                                                                                                | *    | 0.69  | *    | *    | * | 1 | 1                | RGNVIMVRLLLDR                                                                                                                          | 1                |

|                                                                                                                                                                                                                                                                              |      |      |      |      |   |   |                  |                                                                                                       |                  |
|------------------------------------------------------------------------------------------------------------------------------------------------------------------------------------------------------------------------------------------------------------------------------|------|------|------|------|---|---|------------------|-------------------------------------------------------------------------------------------------------|------------------|
| ANK2_HUMAN (Q01484) Ankyrin-2 (Brain ankyrin) (Ankyrin-B) (Ankyrin, nonerythroid) [MASS=430341]                                                                                                                                                                              | 0.61 | 1.76 | 1.17 | 0.00 | 1 | 4 | 3<br>3<br>2<br>3 | ESEVPKEKM[147]ADEQGDM[147]DLQISPDR<br>STRGLVHQAIC[339]NLNITLPIYTK<br>VRDTTQEPC[339]GR<br>HPPVSPSSKTEK | 1<br>1<br>1<br>1 |
| ANK3_HUMAN (Q12955) Ankyrin-3 (ANK-3) (Ankyrin-G) [MASS=480400]                                                                                                                                                                                                              | *    | 0.43 | *    | *    | * | 2 | 3<br>2           | PC[339]VPVSMKKM[147]SR<br>EMYVYQK                                                                     | 1<br>1           |
| ANM3_HUMAN (O60678) Protein arginine N-methyltransferase 3 (EC 2.1.1.-) (Heterogeneous nuclear ribonucleoprotein methyltransferase-like protein 3) [MASS=59903]                                                                                                              | *    | 2.45 | *    | *    | * | 1 | 3                | SEHQFNIDSM[147]VHK                                                                                    | 3                |
| ANR47_HUMAN (Q6NY19) Ankyrin repeat domain-containing protein 47 [MASS=88425]                                                                                                                                                                                                | 0.00 | 4.17 | 2.02 | 0.00 | 1 | 2 | 3<br>2           | LFC[339]M[147]GDVNAKASQTGQTALM[147]LAISHGR<br>PDKLAQLR                                                | 1<br>1           |
| ANR50_HUMAN (Q9ULJ7) Ankyrin repeat domain-containing protein 50 [MASS=149588]                                                                                                                                                                                               | *    | 0.87 | *    | *    | * | 1 | 2                | NALRVAALEGHR                                                                                          | 1                |
| ANXA2_HUMAN (P07355) Annexin A2 (Annexin II) (Lipocortin II) (Calpactin I heavy chain) (Chromobindin-8) (p36) (Protein I) (Placental anticoagulant protein IV) (PAP-IV) [MASS=38473]                                                                                         | 0.99 | 7.99 | 1.01 | 0.00 | 1 | 1 | 3                | EVKGDLENAFLNLVQC[339]IQNKPLYFADR                                                                      | 1                |
| ANXA6_HUMAN (P08133) Annexin A6 (Annexin VI) (Lipocortin VI) (P68) (P70) (Protein III) (Chromobindin-20) (67 kDa calelectrin) (Calphobindin-II) (CPB-II) [MASS=75742]                                                                                                        | 0.87 | 3.87 | 0.57 | 0.00 | 1 | 2 | 1<br>2           | M[147]TNYDVEHTIK<br>LIVGLM[147]RPPAYC[339]DAK                                                         | 1<br>1           |
| AOFA_HUMAN (P21397) Amine oxidase [flavin-containing] A (EC 1.4.3.4) (Monoamine oxidase type A) (MAO-A) [MASS=59681]                                                                                                                                                         | 0.99 | 2.85 | 1.07 | 0.02 | 2 | 2 | 2<br>2           | KIC[339]ELYAK<br>IC[339]ELYAK                                                                         | 1<br>1           |
| AOFB_HUMAN (P27338) Amine oxidase [flavin-containing] B (EC 1.4.3.4) (Monoamine oxidase type B) (MAO-B) [MASS=58631]                                                                                                                                                         | 0.90 | 1.16 | 1.17 | 0.00 | 1 | 1 | 1                | C[339]JVYYK                                                                                           | 1                |
| AP1B1_HUMAN (Q10567) AP-1 complex subunit beta-1 (Adapter-related protein complex 1 beta-1 subunit) (Beta-adaptin 1) (Adaptor protein complex AP-1 beta-1 subunit) (Golgi adaptor HA1/AP1 adaptin beta subunit) (Clathrin assembly protein complex 1 beta larg [MASS=104606] | 0.81 | 3.16 | 1.31 | 0.00 | 1 | 2 | 2<br>2           | C[339]RAPEVSKHVYQAYETILK<br>C[339]AIKVEQSAER                                                          | 1<br>1           |

|                                                                                                                                                                     |      |       |      |      |   |   |   |                                                            |             |
|---------------------------------------------------------------------------------------------------------------------------------------------------------------------|------|-------|------|------|---|---|---|------------------------------------------------------------|-------------|
| APC_HUMAN (P25054) Adenomatous polyposis coli protein (Protein APC) [MASS=311644]                                                                                   | 0.00 | 1.16  | 0.61 | 0.00 | 1 | 2 | 3 | NM[147]GGILGEDLTLDLKDQIR<br>SGEC[330]SPVPM[147]GSFPR       | 1<br>1      |
| APOD_HUMAN (P05090) Apolipoprotein D precursor (Apo-D) (ApoD) [MASS=21275]                                                                                          | *    | 11.64 | *    | *    | * | 1 | 2 | C[339]IQANYSLMENGKIKVLNQELR                                | 1           |
| AQP11_HUMAN (Q8NBQ7) Aquaporin-11 (AQP-11) [MASS=30203]                                                                                                             | *    | 8.86  | *    | *    | * | 1 | 2 | YC[330]TSALWSLGLTQYHVSERSFAC[330]K                         | 1           |
| AQP9_HUMAN (O43315) Aquaporin-9 (AQP-9) (Small solute channel 1) [MASS=31401]                                                                                       | 0.00 | 12.20 | 5.71 | 0.00 | 1 | 1 | 3 | NLGAPRGGLEPIAIGLLIIVASSLGLNSGC[339]AM[147]NPAR             | 1           |
| ARBK1_HUMAN (P25098) Beta-adrenergic receptor kinase 1 (EC 2.7.11.15) (Beta-ARK-1) (G-protein coupled receptor kinase 2) [MASS=79667]                               | 0.00 | 5.22  | 2.55 | 0.00 | 1 | 3 | 1 | VPKMK<br>2 SREIFDSYIM[147]K<br>3 KQVPPDLFQPYIEEIC[339]QNLR | 1<br>1<br>1 |
| ARBK2_HUMAN (P35626) Beta-adrenergic receptor kinase 2 (EC 2.7.11.15) (Beta-ARK-2) (G-protein-coupled receptor kinase 3) [MASS=79677]                               | *    | 2.62  | *    | *    | * | 1 | 3 | YFYLFPNRLEWRGEGESR                                         | 1           |
| ARHG2_HUMAN (Q92974) Rho/Rac guanine nucleotide exchange factor 2 (GEF-H1 protein) (Proliferating cell nucleolar antigen p40) [MASS=101173]                         | 0.00 | 1.46  | 1.58 | 0.00 | 1 | 1 | 2 | HGVQEC[339]ILLVTQR                                         | 1           |
| ARHG3_HUMAN (Q9NR81) Rho guanine nucleotide exchange factor 3 (Exchange factor found in platelets and leukemic and neuronal tissues) (XPLN) [MASS=59782]            | *    | 2.66  | *    | *    | * | 1 | 2 | AVTHNEQLC[330]YQLYR                                        | 1           |
| ARI4A_HUMAN (P29374) AT-rich interactive domain-containing protein 4A (ARID domain-containing protein 4A) (Retinoblastoma-binding protein 1) (RBBP-1) [MASS=142666] | *    | 0.88  | *    | *    | * | 1 | 3 | TSDC[339]IGSEGM[147]K                                      | 1           |
| ARID2_HUMAN (Q68CP9) AT-rich interactive domain-containing protein 2 (ARID domain-containing protein 2) (BRG1-associated factor 200) (BAF200) [MASS=197390]         | *    | 1.69  | *    | *    | * | 2 | 2 | SSTKQPTVGGTSSTPRAQK<br>3 DFTDEKEGPITK                      | 1<br>1      |
| ARSE_HUMAN (P51690) Arylsulfatase E precursor (EC 3.1.6.-) (ASE) [MASS=65668]                                                                                       | *    | 1.02  | *    | *    | * | 1 | 1 | VPGIFR                                                     | 1           |



|                                                                                                                                                                                                                                                                           |      |       |      |      |   |   |   |                                       |   |
|---------------------------------------------------------------------------------------------------------------------------------------------------------------------------------------------------------------------------------------------------------------------------|------|-------|------|------|---|---|---|---------------------------------------|---|
| ASPG_HUMAN (P20933) N(4)-(beta-N-acetylglucosaminy)-L-asparaginase precursor (EC 3.5.1.26) (Glycosylasparaginase) (Aspartylglucosaminidase) (N4-(N-acetyl-beta-glucosaminy)-L-asparagine amidase) (AGA) [Contains: Glycosylasparaginase alpha chain; Glycosy [MASS=37194] | 0.00 | 4.05  | *    | *    | * | 1 | 3 | TGHIAAGTSTNGIK                        | 1 |
| AT10D_HUMAN (Q9P241) Probable phospholipid-transporting ATPase VD (EC 3.6.3.1) (ATPVD) [MASS=160319]                                                                                                                                                                      | *    | 1.82  | *    | *    | * | 1 | 3 | EELLESAMRLENKLTLLGATGIEDR             | 1 |
| AT12A_HUMAN (P54707) Potassium-transporting ATPase alpha chain 2 (EC 3.6.3.10) (Proton pump) (Non-gastric H(+)/K(+) ATPase subunit alpha) [MASS=115898]                                                                                                                   | 0.00 | 0.86  | *    | *    | * | 1 | 2 | LIIVEGC[339]QR                        | 1 |
|                                                                                                                                                                                                                                                                           |      |       |      |      |   |   | 2 | NIAFFSTNC[330]VEGTAR                  | 1 |
|                                                                                                                                                                                                                                                                           |      |       |      |      |   |   | 2 | C[339]SSILLHGK                        | 2 |
| AT1A1_HUMAN (P05023) Sodium/potassium-transporting ATPase alpha-1 chain precursor (EC 3.6.3.9) (Sodium pump 1) (Na+/K+ ATPase 1) [MASS=112895]                                                                                                                            | 1.00 | 5.28  | 0.95 | 0.08 | 6 | 4 | 2 | AC[330]VVHGSDLK                       | 1 |
|                                                                                                                                                                                                                                                                           |      |       |      |      |   |   | 2 | AC[339]VVHGSDLK                       | 1 |
|                                                                                                                                                                                                                                                                           |      |       |      |      |   |   | 1 | C[339]SSILLHGK                        | 1 |
|                                                                                                                                                                                                                                                                           |      |       |      |      |   |   | 3 | YGTDLRGLTSARAAEILAR                   | 1 |
| AT1A2_HUMAN (P50993) Sodium/potassium-transporting ATPase alpha-2 chain precursor (EC 3.6.3.9) (Sodium pump 2) (Na+/K+ ATPase 2) [MASS=112265]                                                                                                                            | 0.98 | 1.27  | 0.85 | 0.00 | 1 | 1 | 2 | VLGFC[330]QLNLPSGK                    | 1 |
|                                                                                                                                                                                                                                                                           |      |       |      |      |   |   | 2 | VLGFC[339]HYLPEEQFPK                  | 1 |
|                                                                                                                                                                                                                                                                           |      |       |      |      |   |   | 2 | NITFFSTNC[339]VEGTAR                  | 1 |
| AT1A3_HUMAN (P13637) Sodium/potassium-transporting ATPase alpha-3 chain (EC 3.6.3.9) (Sodium pump 3) (Na+/K+ ATPase 3) (Alpha(III)) [MASS=111734]                                                                                                                         | 1.00 | 10.17 | 0.97 | 0.15 | 6 | 6 | 3 | SPDC[330]THDNPLETR                    | 1 |
|                                                                                                                                                                                                                                                                           |      |       |      |      |   |   | 3 | C[339]STILLQGKEQPLDEEM[147]K          | 1 |
|                                                                                                                                                                                                                                                                           |      |       |      |      |   |   | 2 | C[339]IELSSGSVK                       | 1 |
|                                                                                                                                                                                                                                                                           |      |       |      |      |   |   | 1 | C[330]IELSSGSVK                       | 1 |
|                                                                                                                                                                                                                                                                           |      |       |      |      |   |   | 2 | SPDC[330]THDNPLETR                    | 1 |
|                                                                                                                                                                                                                                                                           |      |       |      |      |   |   | 3 | AC[330]VIHGTDLKDFITSEQIDEILQNHTEIVFAR | 1 |
| AT1A4_HUMAN (Q13733) Sodium/potassium-transporting ATPase alpha-4 chain (EC 3.6.3.9) (Sodium pump 4) (Na+/K+ ATPase 4) [MASS=114166]                                                                                                                                      | 0.00 | 2.62  | *    | *    | * | 1 | 3 | M[147]QINVQEVVLGDLVEIKGGDRVPADLR      | 1 |

|                                                                                                                                                                                                                                                                              |      |       |      |      |   |   |   |                                  |   |
|------------------------------------------------------------------------------------------------------------------------------------------------------------------------------------------------------------------------------------------------------------------------------|------|-------|------|------|---|---|---|----------------------------------|---|
| AT1B1_HUMAN (P05026) Sodium/potassium-transporting ATPase subunit beta-1 (Sodium/potassium-dependent ATPase beta-1 subunit) [MASS=35061]                                                                                                                                     | 1.00 | 4.29  | 0.89 | 0.00 | 2 | 1 | 2 | YNPNVLPVQC[330]TGK               | 1 |
|                                                                                                                                                                                                                                                                              |      |       |      |      |   |   | 2 | YNPNVLPVQC[339]TGK               | 1 |
| AT2A2_HUMAN (P16615) Sarcoplasmic/endoplasmic reticulum calcium ATPase 2 (EC 3.6.3.8) (Calcium pump 2) (SERCA2) (SR Ca(2+)-ATPase 2) (Calcium-transporting ATPase sarcoplasmic reticulum type, slow twitch skeletal muscle isoform) (Endoplasmic reticulum cla [MASS=114756] | 1.00 | 2.69  | 0.97 | 0.02 | 2 | 2 | 2 | NYLEPGKEC[330]VQPATK             | 2 |
|                                                                                                                                                                                                                                                                              |      |       |      |      |   |   | 2 | SM[147]SVYC[339]TPNKPSR          | 1 |
| AT2A3_HUMAN (Q93084) Sarcoplasmic/endoplasmic reticulum calcium ATPase 3 (EC 3.6.3.8) (Calcium pump 3) (SERCA3) (SR Ca(2+)-ATPase 3) [MASS=113977]                                                                                                                           | *    | 2.88  | *    | *    | * | 1 | 3 | SAAEMVLSDDNFASIVAAVEEGRAIYSNMK   | 1 |
| AT2B4_HUMAN (P23634) Plasma membrane calcium-transporting ATPase 4 (EC 3.6.3.8) (PMCA4) (Plasma membrane calcium pump isoform 4) (Plasma membrane calcium ATPase isoform 4) [MASS=137919]                                                                                    | 0.00 | 5.24  | 1.29 | 0.00 | 1 | 3 | 2 | DALTQINVHYGGVQNLNLC[339]SR       | 1 |
|                                                                                                                                                                                                                                                                              |      |       |      |      |   |   | 3 | AGLLM[147]SALTVFILILYFVIDNFVINR  | 1 |
|                                                                                                                                                                                                                                                                              |      |       |      |      |   |   | 3 | TEC[339]ALLGFVTDLQDYQAVR         | 1 |
| AT5F1_HUMAN (P24539) ATP synthase B chain, mitochondrial precursor (EC 3.6.3.14) [MASS=28908]                                                                                                                                                                                | *    | 2.34  | *    | *    | * | 1 | 1 | C[339]IADLK                      | 2 |
| ATM_HUMAN (Q13315) Serine-protein kinase ATM (EC 2.7.11.1) (Ataxia telangiectasia mutated) (A-T, mutated) [MASS=350642]                                                                                                                                                      | *    | 2.98  | *    | *    | * | 5 | 3 | SHFDEVKSIANQIQEDWK               | 1 |
|                                                                                                                                                                                                                                                                              |      |       |      |      |   |   | 2 | MMGGLGFHEVLNLLISR                | 1 |
|                                                                                                                                                                                                                                                                              |      |       |      |      |   |   | 3 | KLDASC[330]AANNPSLKLTYTEC[339]LR | 1 |
|                                                                                                                                                                                                                                                                              |      |       |      |      |   |   | 2 | QEKSSSGLNHILAALTIFLK             | 1 |
|                                                                                                                                                                                                                                                                              |      |       |      |      |   |   | 3 | KSQRTMLAVVDYMR                   | 1 |
| ATP8_HUMAN (P03928) ATP synthase protein 8 (EC 3.6.3.14) (ATPase subunit 8) (A6L) [MASS=7992]                                                                                                                                                                                | 0.96 | 16.18 | 1.31 | 0.00 | 1 | 1 | 2 | IC[339]SLHSLPPQS                 | 1 |
|                                                                                                                                                                                                                                                                              |      |       |      |      |   |   | 2 | LYC[339]IYVAIGQK                 | 1 |
|                                                                                                                                                                                                                                                                              |      |       |      |      |   |   | 1 | LYC[339]IYVAIGQK                 | 2 |
| ATPA_HUMAN (P25705) ATP synthase alpha chain, mitochondrial precursor (EC 3.6.3.14) [MASS=59750]                                                                                                                                                                             | 1.00 | 11.03 | 0.88 | 0.14 | 5 | 4 | 2 | KLYC[330]IYVAIGQK                | 1 |
|                                                                                                                                                                                                                                                                              |      |       |      |      |   |   | 1 | LYC[330]IYVAIGQK                 | 1 |
|                                                                                                                                                                                                                                                                              |      |       |      |      |   |   | 2 | KKLYC[330]IYVAIGQK               | 1 |
|                                                                                                                                                                                                                                                                              |      |       |      |      |   |   | 3 | FENAFLSHVVSQHQALLGTIRADGK        | 1 |

|                                                                                                                                                                                                                                                                             |      |       |      |      |   |   |   |                                          |   |
|-----------------------------------------------------------------------------------------------------------------------------------------------------------------------------------------------------------------------------------------------------------------------------|------|-------|------|------|---|---|---|------------------------------------------|---|
| ATPG_HUMAN (P36542) ATP synthase gamma chain, mitochondrial precursor (EC 3.6.3.14) [MASS=32996]                                                                                                                                                                            | 1.00 | 7.72  | 1.06 | 0.08 | 6 | 2 | 1 | GLC[339]GAIHSSIAK                        | 1 |
|                                                                                                                                                                                                                                                                             |      |       |      |      |   |   | 1 | GLC[330]GAIHSSIAK                        | 1 |
|                                                                                                                                                                                                                                                                             |      |       |      |      |   |   | 1 | KHLLIGVSSDR                              | 1 |
|                                                                                                                                                                                                                                                                             |      |       |      |      |   |   | 2 | GLC[339]GAIHSSIAK                        | 2 |
|                                                                                                                                                                                                                                                                             |      |       |      |      |   |   | 2 | GLC[330]GAIHSSIAK                        | 2 |
| ATPO_HUMAN (P48047) ATP synthase O subunit, mitochondrial precursor (EC 3.6.3.14) (Oligomycin sensitivity conferral protein) (OSCP) [MASS=23277]                                                                                                                            | 1.00 | 10.33 | 1.12 | 0.02 | 2 | 1 | 2 | GEVPC[339]TVTSASPLEEATLSELK              | 1 |
|                                                                                                                                                                                                                                                                             |      |       |      |      |   |   | 2 | GEVPC[330]TVTSASPLEEATLSELK              | 1 |
| ATS5_HUMAN (Q9UNA0) ADAMTS-5 precursor (EC 3.4.24.-) (A disintegrin and metalloproteinase with thrombospondin motifs 5) (ADAM-TS 5) (ADAM-TS5) (Aggrecanase-2) (ADMP-2) (ADAM-TS 11) [MASS=101715]                                                                          | *    | 4.19  | *    | *    | * | 2 | 2 | YTLKPLLRGPWAEEEK                         | 1 |
|                                                                                                                                                                                                                                                                             |      |       |      |      |   |   | 3 | TFVEWVPKYAGVLPADV[C330]KLTC[339]R        | 1 |
| ATS9_HUMAN (Q9P2N4) ADAMTS-9 precursor (EC 3.4.24.-) (A disintegrin and metalloproteinase with thrombospondin motifs 9) (ADAM-TS 9) (ADAM-TS9) [MASS=216556]                                                                                                                | *    | 2.48  | *    | *    | * | 3 | 3 | KLVC[330]TRESQQLTVSDQR                   | 1 |
|                                                                                                                                                                                                                                                                             |      |       |      |      |   |   | 2 | EKRTHR                                   | 1 |
|                                                                                                                                                                                                                                                                             |      |       |      |      |   |   | 3 | SHDGDYFIEPLQSMDEQEDEEEQNK                | 1 |
| AUMH_HUMAN (Q13825) Methylglutaconyl-CoA hydratase, mitochondrial precursor (EC 4.2.1.18) (AU-specific RNA-binding enoyl-CoA hydratase) (AU-binding protein/enoyl-CoA hydratase) [MASS=35608]                                                                               | 0.00 | 10.32 | 1.05 | 0.00 | 1 | 1 | 3 | AVINDIANLPVPTIAAIDGLALGGGLELALAC[339]DIR | 1 |
| AVR2A_HUMAN (P27037) Activin receptor type 2A precursor (EC 2.7.11.30) (Activin receptor type IIA) (ACTR-IIA) (ACTRIIA) [MASS=57847]                                                                                                                                        | 0.00 | 3.51  | 0.22 | 0.00 | 1 | 1 | 2 | LFAVFLISC[330]SSGAILGR                   | 1 |
| B3GN3_HUMAN (Q9Y2A9) UDP-GlcNAc:betaGal beta-1,3-N-acetylglucosaminyltransferase 3 (EC 2.4.1.-) (Beta3Gn-T3) (BGnT-3) (Core 1 extending beta-1,3-N-acetylglucosaminyltransferase) (Core1-beta3GlcNAcT) (Beta-1,3-galactosyltransferase 8) (Beta-1,3-GalTase 8) [MASS=42515] | 0.00 | 3.23  | 0.25 | 0.00 | 1 | 1 | 2 | C[330]AQPVFLLLVIK                        | 1 |

|                                                                                                                                                                                                     |      |       |      |      |   |   |                  |                                                                                    |                  |
|-----------------------------------------------------------------------------------------------------------------------------------------------------------------------------------------------------|------|-------|------|------|---|---|------------------|------------------------------------------------------------------------------------|------------------|
| BAI1_HUMAN (O14514) Brain-specific angiogenesis inhibitor 1 precursor [MASS=173532]                                                                                                                 | 0.00 | 3.47  | 0.35 | 0.00 | 1 | 4 | 3<br>3<br>2<br>1 | RQQPPQHDGLRPR<br>GDVC[339]LRDAVAGGPENC[339]LTSLTQDR<br>GC[330]RTVPLDALRTR<br>MKDLR | 1<br>1<br>1<br>1 |
| BARX2_HUMAN (Q9UMQ3) Homeobox protein BarH-like 2 [MASS=28248]                                                                                                                                      | 0.00 | 10.63 | 1.26 | 0.00 | 1 | 1 | 3                | MNSQAQGQEQLEPSQGEELC[339]EAAQEPK                                                   | 1                |
| BCOR_HUMAN (Q6W2J9) BCoR protein (BCL-6 corepressor) [MASS=192187]                                                                                                                                  | *    | 0.85  | *    | *    | * | 1 | 2                | QAQPSC[330]APASRPPAK                                                               | 1                |
| BIG2_HUMAN (Q9Y6D5) Brefeldin A-inhibited guanine nucleotide-exchange protein 2 (Brefeldin A-inhibited GEP 2) [MASS=202092]                                                                         | *    | 1.23  | *    | *    | * | 1 | 3                | YMSSQHFLFKLLDC[339]LQESHFSFK                                                       | 1                |
| BIRC2_HUMAN (Q13490) Baculoviral IAP repeat-containing protein 2 (Inhibitor of apoptosis protein 2) (HIAP2) (HIAP-2) (C-IAP1) (TNFR2-TRAF signaling complex protein 2) (IAP homolog B) [MASS=69899] | 0.00 | 3.88  | 0.16 | 0.00 | 1 | 1 | 3                | HKQLYPSC[330]SFIQNLVSASLGSTSK                                                      | 1                |
| BIRC6_HUMAN (Q9NR09) Baculoviral IAP repeat-containing protein 6 (Ubiquitin-conjugating BIR-domain enzyme apollon) [MASS=527606]                                                                    | *    | 0.31  | *    | *    | * | 1 | 3                | WAMLEQIRNPSPC[330]FK                                                               | 2                |
| BKRB2_HUMAN (P30411) B2 bradykinin receptor (BK-2 receptor) (B2R) [MASS=44460]                                                                                                                      | *    | 6.14  | *    | *    | * | 1 | 3                | VVNAIISM[147]NLYSSIC[339]FLM[147]LVSIDR                                            | 1                |
| BMP1_HUMAN (P13497) Bone morphogenetic protein 1 precursor (EC 3.4.24.19) (BMP-1) (Procollagen C-proteinase) (PCP) (Mammalian tolloid protein) (mTld) [MASS=111248]                                 | 0.00 | 3.85  | 1.24 | 0.00 | 1 | 3 | 2<br>2<br>2      | YC[330]GSGPPEEVYSAGDSVLVK<br>YC[330]GYEK<br>RGGGPQAISIGK                           | 1<br>1<br>1      |
| BPAEB_HUMAN (Q8W XK8) Bullous pemphigoid antigen 1, isoform 7 (Bullous pemphigoid antigen) (BPA) (Hemidesmosomal plaque protein) (Dystonia musculorum protein) (Dystonin) (Fragment) [MASS=344987]  | *    | 0.52  | *    | *    | * | 1 | 2                | ESFTASLKFDDSGSWR                                                                   | 1                |
| BR44_HUMAN (O95563) Brain protein 44 [MASS=14279]                                                                                                                                                   | *    | 37.80 | *    | *    | * | 3 | 3<br>1<br>2      | PLYNHPAGPRTVFFWAPIMKWGLVC[330]AGLADMAR<br>M[147]SAAGAR<br>VELM[147]LPEK            | 1<br>1<br>1      |
| BRCA2_HUMAN (P51587) Breast cancer type 2 susceptibility protein (Fanconi anemia group D1 protein) [MASS=384223]                                                                                    | *    | 0.50  | *    | *    | * | 1 | 3                | TSGNSFKVNSC[330]KDHIGK                                                             | 1                |

|                                                                                                                                                                                                                                                                              |      |       |      |      |   |   |   |                                         |   |
|------------------------------------------------------------------------------------------------------------------------------------------------------------------------------------------------------------------------------------------------------------------------------|------|-------|------|------|---|---|---|-----------------------------------------|---|
| BRD1_HUMAN (O95696) Bromodomain-containing protein 1 (BR140-like protein) [MASS=119519]                                                                                                                                                                                      | 0.00 | 3.12  | 3.84 | 0.00 | 1 | 2 | 1 | GGAFKK                                  | 1 |
|                                                                                                                                                                                                                                                                              |      |       |      |      |   |   | 3 | ISIFDPLEIILEDLTAQEMSEC[339]NSNK         | 1 |
|                                                                                                                                                                                                                                                                              |      |       |      |      |   |   | 3 | VC[330]NQC[339]GFNPNPHLTQVK             | 1 |
| BSN_HUMAN (Q9UPA5) Bassoon protein (Zinc-finger protein 231) [MASS=416365]                                                                                                                                                                                                   | 0.00 | 1.94  | 8.57 | 0.00 | 1 | 4 | 2 | GGHLRSM[147]ESNGRPASTHYYGDSYR           | 1 |
|                                                                                                                                                                                                                                                                              |      |       |      |      |   |   | 3 | DAC[330]ELESgtePC[339]VVR               | 1 |
|                                                                                                                                                                                                                                                                              |      |       |      |      |   |   | 2 | EPGEPGVLDPGPTLPC[339]C[339]YAR          | 1 |
|                                                                                                                                                                                                                                                                              |      |       |      |      |   |   | 3 | FNYC[330]ILDEGHVIKNGKTK                 | 1 |
| BTAF1_HUMAN (O14981) TATA-binding protein-associated factor 172 (EC 3.6.1.-) (ATP-dependent helicase BTAF1) (TBP-associated factor 172) (TAF-172) (TAF(II)170) (B-TFIID transcription factor-associated 170 kDa subunit) [MASS=206886]                                       | 0.00 | 3.73  | 0.35 | 0.70 | 2 | 4 | 2 | LDGSIPPGQR                              | 1 |
|                                                                                                                                                                                                                                                                              |      |       |      |      |   |   | 1 | HGAGTGLR                                | 6 |
|                                                                                                                                                                                                                                                                              |      |       |      |      |   |   | 3 | QEGAIEALAC[330]VMEQLDVGIVPYIVLLVVPVLR   | 1 |
| C1QBP_HUMAN (Q07021) Complement component 1 Q subcomponent-binding protein, mitochondrial precursor (Glycoprotein gC1qBP) (C1qBP) (GC1q-R protein) (Hyaluronan-binding protein 1) (Mitochondrial matrix protein p32) (p33) [MASS=31362]                                      | 1.00 | 9.57  | 1.68 | 0.00 | 1 | 1 | 3 | ALVLDLC[339]HYPEDEVGQEDEAESDIFSIR       | 1 |
| C1QC_HUMAN (P02747) Complement C1q subcomponent subunit C precursor [MASS=25773]                                                                                                                                                                                             | *    | 13.47 | *    | *    | * | 1 | 3 | LLLLLLLLPLRGQANTGC[330]YGIPGMPGLPGAPGK  | 1 |
| C560_HUMAN (Q99643) Succinate dehydrogenase cytochrome b560 subunit, mitochondrial precursor (Integral membrane protein CII-3) (QPs1) (QPs-1) (Succinate dehydrogenase complex subunit C) (Succinate-ubiquinone oxidoreductase cytochrome B large subunit) (CY [MASS=18610]) | 0.99 | 7.69  | 1.59 | 0.03 | 2 | 1 | 2 | SLC[339]LGPALIHAK                       | 2 |
| C5ARL_HUMAN (Q9P296) C5a anaphylatoxin chemotactic receptor C5L2 (G-protein coupled receptor 77) [MASS=36080]                                                                                                                                                                | 0.00 | 8.61  | 0.52 | 0.00 | 1 | 1 | 3 | VGATWLLHLAVADLLC[330]C[330]LSLPILAVPIAR | 1 |
| CABL2_HUMAN (Q9BTV7) CDK5 and ABL1 enzyme substrate 2 (Interactor with CDK3 2) (Ik3-2) [MASS=52235]                                                                                                                                                                          | *    | 1.67  | *    | *    | * | 1 | 1 | QYDTRNSR                                | 1 |

|                                                                                                                                                                                                                              |      |      |      |      |   |   |   |                                       |   |
|------------------------------------------------------------------------------------------------------------------------------------------------------------------------------------------------------------------------------|------|------|------|------|---|---|---|---------------------------------------|---|
| CAC1S_HUMAN (Q13698) Voltage-dependent L-type calcium channel subunit alpha-1S (Voltage-gated calcium channel subunit alpha Cav1.1) (Calcium channel, L type, alpha-1 polypeptide, isoform 3, skeletal muscle) [MASS=212163] | 0.00 | 1.28 | 1.46 | 0.00 | 1 | 1 | 3 | KPVPEILPSPRALFC[339]LTLENPLR          | 1 |
| CAD17_HUMAN (Q12864) Cadherin-17 precursor (Liver-intestine-cadherin) (LI-cadherin) (Intestinal peptide-associated transporter HPT-1) [MASS=92148]                                                                           | 0.00 | 0.96 | *    | *    | * | 1 | 1 | YNASSFAK                              | 1 |
| CADH5_HUMAN (P33151) Vascular endothelial-cadherin precursor (VE-cadherin) (Cadherin-5) (7B4 antigen) (CD144 antigen) [MASS=87516]                                                                                           | *    | 2.68 | *    | *    | * | 1 | 3 | GDYQDAFTIETNPAHNEGIK                  | 1 |
| CALI_HUMAN (Q13939) Calicin [MASS=66555]                                                                                                                                                                                     | *    | 4.08 | *    | *    | * | 1 | 3 | EVWC[339]LAGKMSIPMDGTAVITKGDR         | 1 |
| CALX_HUMAN (P27824) Calnexin precursor (Major histocompatibility complex class I antigen-binding protein p88) (p90) (IP90) [MASS=67568]                                                                                      | 0.57 | 5.41 | 3.23 | 0.00 | 1 | 1 | 3 | LNKPFLFDTKPLIVQYEVNFQNGIEC[339]GGAYVK | 1 |
| CATA_HUMAN (P04040) Catalase (EC 1.11.1.6) [MASS=59625]                                                                                                                                                                      | *    | 4.75 | *    | *    | * | 1 | 3 | IPERVVHAKGAGAFGYFEVTHDITK             | 1 |
| CATD_HUMAN (P07339) Cathepsin D precursor (EC 3.4.23.5) [Contains: Cathepsin D light chain; Cathepsin D heavy chain] [MASS=44552]                                                                                            | 0.73 | 2.67 | 0.88 | 0.00 | 1 | 1 | 2 | LLDIAC[330]WIHHK                      | 1 |
| CBLN2_HUMAN (Q8IUK8) Cerebellin-2 precursor [MASS=24084]                                                                                                                                                                     | *    | 5.36 | *    | *    | * | 1 | 3 | MQAPGRGPLGLR                          | 1 |
| CC020_HUMAN (Q8ND61) Protein C3orf20 [MASS=101268]                                                                                                                                                                           | 0.00 | 3.76 | 0.35 | 0.00 | 1 | 2 | 3 | GSPC[330]IQC[330]RYDSYR               | 1 |
| CC023_HUMAN (Q8N3R3) Protein C3orf23 [MASS=57894]                                                                                                                                                                            | 0.00 | 2.82 | 3.18 | 0.00 | 1 | 1 | 3 | C[339]LVKAPLVSDVELERFLLAPR            | 1 |
| CC14B_HUMAN (O60729) Dual specificity protein phosphatase CDC14B (EC 3.1.3.48) (EC 3.1.3.16) (CDC14 cell division cycle 14 homolog B) [MASS=56801]                                                                           | 0.00 | 3.61 | 0.94 | 0.00 | 1 | 1 | 2 | EPSISSIQM[147]VDC[339]C[339]K         | 1 |
| CC28B_HUMAN (Q9BUN5) Coiled-coil domain-containing protein 28B [MASS=26904]                                                                                                                                                  | 0.00 | 6.64 | 0.63 | 0.00 | 1 | 1 | 2 | QANAFLVGC[339]YMVIYLGR                | 1 |
|                                                                                                                                                                                                                              |      |      |      |      |   |   |   | EC[339]SFEQLEHVREMQEK                 | 1 |

|                                                                                                                                                                                                                                                                              |      |       |        |      |   |   |   |                                          |   |
|------------------------------------------------------------------------------------------------------------------------------------------------------------------------------------------------------------------------------------------------------------------------------|------|-------|--------|------|---|---|---|------------------------------------------|---|
| CCD22_HUMAN (O60826) Coiled-coil domain-containing protein 22 [MASS=70755]                                                                                                                                                                                                   | *    | 2.07  | *      | *    | * | 1 | 2 | M[147]EEADRILIHSLR                       | 1 |
| CD19_HUMAN (P15391) B-lymphocyte antigen CD19 precursor (Differentiation antigen CD19) (B-lymphocyte surface antigen B4) (Leu-12) [MASS=61088]                                                                                                                               | 0.00 | 6.29  | 0.14   | 0.00 | 1 | 3 | 3 | GNLTM[147]SFHLEITAR                      | 1 |
|                                                                                                                                                                                                                                                                              |      |       |        |      |   |   | 2 | PEEPLVVK                                 | 1 |
|                                                                                                                                                                                                                                                                              |      |       |        |      |   |   | 3 | VEEGDNAVLQC[330]LK                       | 1 |
| CD1D_HUMAN (P15813) T-cell surface glycoprotein CD1d precursor (CD1d antigen) (R3G1) [MASS=37717]                                                                                                                                                                            | 0.00 | 7.16  | 999.00 | 0.00 | 1 | 1 | 3 | M[147]GC[339]LLFLLLWALLQAWGSAEVPQR       | 1 |
| CD20_HUMAN (P11836) B-lymphocyte antigen CD20 (B-lymphocyte surface antigen B1) (Leu-16) (Bp35) [MASS=33077]                                                                                                                                                                 | 0.00 | 2.36  | 1.31   | 0.00 | 1 | 1 | 1 | KC[339]LVK GK                            | 1 |
| CD34_HUMAN (P28906) Hematopoietic progenitor cell antigen CD34 precursor [MASS=40716]                                                                                                                                                                                        | *    | 1.56  | *      | *    | * | 1 | 1 | GEGLAR                                   | 1 |
| CD59_HUMAN (P13987) CD59 glycoprotein precursor (Membrane attack complex inhibition factor) (MACIF) (MAC-inhibitory protein) (MAC-IP) (Protectin) (MEM43 antigen) (Membrane inhibitor of reactive lysis) (MIRL) (20 kDa homologous restriction factor) (HRF-20) [MASS=14177] | 1.00 | 18.75 | 0.80   | 0.03 | 3 | 2 | 2 | FEHC[339]NFNDVTTR                        | 1 |
|                                                                                                                                                                                                                                                                              |      |       |        |      |   |   | 2 | LRENELTYYC[330]C[330]K                   | 1 |
|                                                                                                                                                                                                                                                                              |      |       |        |      |   |   | 2 | LRENELTYYC[339]C[339]K                   | 1 |
| CD9_HUMAN (P21926) CD9 antigen (p24) (Leukocyte antigen MIC3) (Motility-related protein) (MRP-1) (Tetraspanin-29) (Tspan-29) [MASS=25285]                                                                                                                                    | 0.00 | 13.22 | 0.17   | 0.00 | 1 | 2 | 3 | AIHYALNC[339]C[339]GLAGGVEQFISDIC[339]PK | 1 |
|                                                                                                                                                                                                                                                                              |      |       |        |      |   |   | 1 | NREM[147]V                               | 2 |
| CDC42_HUMAN (P60953) Cell division control protein 42 homolog precursor (G25K GTP-binding protein) [MASS=21310]                                                                                                                                                              | 0.77 | 5.76  | 0.84   | 0.00 | 1 | 1 | 2 | WVPEITHHC[339]PK                         | 1 |
| CENG1_HUMAN (Q99490) Centaurin-gamma 1 (ARF-GAP with GTP-binding protein-like, ankyrin repeat and pleckstrin homology domains 2) (AGAP-2) (Phosphatidylinositol-3-kinase enhancer) (PIKE) (GTP-binding and GTPase-activating protein 2) (GGAP2) [MASS=124673]                | *    | 0.92  | *      | *    | * | 1 | 2 | RSGNSLNKEWK                              | 1 |

|                                                                                                                                                                                                                                                                                                 |           |       |      |      |   |   |   |                                      |   |
|-------------------------------------------------------------------------------------------------------------------------------------------------------------------------------------------------------------------------------------------------------------------------------------------------|-----------|-------|------|------|---|---|---|--------------------------------------|---|
| CENPF_HUMAN (P49454) CENP-F<br>kinetochore protein (Centromere protein F)<br>(Mitosin) (AH antigen) [MASS=367592]                                                                                                                                                                               | *         | 2.43  | *    | *    | * | 6 | 2 | RLSSGQNK                             | 1 |
|                                                                                                                                                                                                                                                                                                 |           |       |      |      |   |   | 1 | TNQEHAALAEENSK                       | 1 |
|                                                                                                                                                                                                                                                                                                 |           |       |      |      |   |   | 3 | SELERSQAAQSAADVSLNPC[330]NTPQK       | 1 |
|                                                                                                                                                                                                                                                                                                 |           |       |      |      |   |   | 1 | KETPSAPAK                            | 1 |
|                                                                                                                                                                                                                                                                                                 |           |       |      |      |   |   | 2 | LQLLSNEIM[147]DKDR                   | 1 |
| 1                                                                                                                                                                                                                                                                                               | FLSLQSEHK | 1     |      |      |   |   |   |                                      |   |
| CEP70_HUMAN (Q8NHQ1) Centrosomal<br>protein of 70 kDa (Cep70 protein) (p10-binding<br>protein) [MASS=69751]                                                                                                                                                                                     | *         | 9.21  | *    | *    | * | 3 | 3 | LM[147]TEKQQEEAEWESINVLLMMHGLKPLSLVK | 1 |
|                                                                                                                                                                                                                                                                                                 |           |       |      |      |   |   | 3 | QYKEDESQSEEEENDYR                    | 1 |
|                                                                                                                                                                                                                                                                                                 |           |       |      |      |   |   | 1 | EQKTLQVK                             | 1 |
| CEZ2_HUMAN (Q8TE49) Zinc finger A20<br>domain-containing protein ? (EC 3.-.-) (Zinc<br>finger protein Cezanne 2) (OTU domain-<br>containing protein 7) [MASS=100676]                                                                                                                            | *         | 1.51  | *    | *    | * | 1 | 3 | EESGASASTSPSEK                       | 1 |
| CH60_HUMAN (P10809) 60 kDa heat shock<br>protein, mitochondrial precursor (Hsp60) (60<br>kDa chaperonin) (CPN60) (Heat shock protein<br>60) (HSP-60) (Mitochondrial matrix protein P1)<br>(P60 lymphocyte protein) (HuCHA60)<br>[MASS=61054]                                                    | 1.00      | 11.34 | 1.20 | 0.07 | 5 | 4 | 2 | C[339]EFQDAYVLLSEK                   | 3 |
|                                                                                                                                                                                                                                                                                                 |           |       |      |      |   |   | 2 | C[339]IPALDSLTPANEDQK                | 1 |
|                                                                                                                                                                                                                                                                                                 |           |       |      |      |   |   | 3 | C[330]EFQDAYVLLSEKK                  | 1 |
|                                                                                                                                                                                                                                                                                                 |           |       |      |      |   |   | 3 | EEKDPGM[147]GAMGGMGGGMGGGM[147]F     | 1 |
| CHCH3_HUMAN (Q9NX63) Coiled-coil-helix-<br>coiled-coil-helix domain-containing protein 3<br>[MASS=26152]                                                                                                                                                                                        | 1.00      | 11.89 | 1.09 | 0.10 | 2 | 2 | 3 | RYESH PVC[339]ADLQAK                 | 1 |
|                                                                                                                                                                                                                                                                                                 |           |       |      |      |   |   | 2 | YESHPVC[330]ADLQAK                   | 1 |
| CHD6_HUMAN (Q8TD26) Chromodomain-<br>helicase-DNA-binding protein 6 (EC 3.6.1.-)<br>(ATP-dependent helicase CHD6) (CHD-6)<br>(Radiation-induced gene B protein)<br>[MASS=305410]                                                                                                                | *         | 0.29  | *    | *    | * | 1 | 2 | TFDWTQFR                             | 1 |
| CHD9_HUMAN (Q3L8U1) Chromodomain-<br>helicase-DNA-binding protein 9 (EC 3.6.1.-)<br>(ATP-dependent helicase CHD9) (CHD-9)<br>(Chromatin-related mesenchymal modulator)<br>(CReMM) (Chromatin remodeling factor<br>CHROM1) (Peroxisomal proliferator-activated<br>receptor A-inter [MASS=326004] | 0.00      | 2.38  | *    | *    | * | 5 | 3 | SDGSGTYTKLQNTQVR                     | 1 |
|                                                                                                                                                                                                                                                                                                 |           |       |      |      |   |   | 2 | DTGEPVIYYLVK                         | 1 |
|                                                                                                                                                                                                                                                                                                 |           |       |      |      |   |   | 2 | ALLAYC[339]LVHYR                     | 1 |
|                                                                                                                                                                                                                                                                                                 |           |       |      |      |   |   | 3 | KNVEGVDIFFFNR                        | 1 |
|                                                                                                                                                                                                                                                                                                 |           |       |      |      |   |   | 2 | TWTDINVVVYHGSLISR                    | 1 |
| CISY_HUMAN (O75390) Citrate synthase,<br>mitochondrial precursor (EC 2.3.3.1)<br>[MASS=51712]                                                                                                                                                                                                   | 0.94      | 3.43  | 1.29 | 0.04 | 2 | 2 | 1 | LPC[339]VAAK                         | 2 |
|                                                                                                                                                                                                                                                                                                 |           |       |      |      |   |   | 1 | GFSIPEC[339]QK                       | 1 |
|                                                                                                                                                                                                                                                                                                 |           |       |      |      |   |   | 1 | LPC[330]VAAK                         | 1 |



|                                                                                                                                                                                                                                                                                  |      |       |      |      |    |   |  |   |                                 |   |
|----------------------------------------------------------------------------------------------------------------------------------------------------------------------------------------------------------------------------------------------------------------------------------|------|-------|------|------|----|---|--|---|---------------------------------|---|
|                                                                                                                                                                                                                                                                                  |      |       |      |      |    |   |  | 2 | FPFC[339]DGAHTK                 | 1 |
|                                                                                                                                                                                                                                                                                  |      |       |      |      |    |   |  | 1 | KFPFC[330]DGAHTK                | 2 |
| CJ070_HUMAN (Q9NZ45) Protein C10orf70<br>[MASS=12199]                                                                                                                                                                                                                            | 1.00 | 36.11 | 1.30 | 0.08 | 10 | 3 |  | 1 | KFPFC[339]DGAHTK                | 1 |
|                                                                                                                                                                                                                                                                                  |      |       |      |      |    |   |  | 2 | KFPFC[339]DGAHTK                | 2 |
|                                                                                                                                                                                                                                                                                  |      |       |      |      |    |   |  | 1 | FPFC[339]DGAHTK                 | 1 |
|                                                                                                                                                                                                                                                                                  |      |       |      |      |    |   |  | 3 | IVHAFDM[147]EDLGDKAVYC[339]R    | 1 |
|                                                                                                                                                                                                                                                                                  |      |       |      |      |    |   |  | 3 | IVHAFDM[147]EDLGDKAVYC[330]R    | 1 |
|                                                                                                                                                                                                                                                                                  |      |       |      |      |    |   |  | 2 | FPFC[330]DGAHTK                 | 1 |
| CK002_HUMAN (Q9UID3) Protein C11orf2<br>(Another new gene 2 protein) [MASS=86042]                                                                                                                                                                                                | *    | 2.43  | *    | *    | *  | 1 |  | 3 | EC[330]PLAQLMSEETDMVRQIR        | 1 |
| CL011_HUMAN (Q9NVM9) Protein C12orf11<br>(Sarcoma antigen NY-SAR-95) [MASS=80225]                                                                                                                                                                                                | *    | 2.12  | *    | *    | *  | 1 |  | 3 | TLLMENAERVGNRGR                 | 1 |
| CLH1_HUMAN (Q00610) Clathrin heavy chain<br>1 (CLH-17) [MASS=191482]                                                                                                                                                                                                             | *    | 1.08  | *    | *    | *  | 2 |  | 2 | TGQIKEVERIC[339]R               | 1 |
|                                                                                                                                                                                                                                                                                  |      |       |      |      |    |   |  | 1 | MYDAAK                          | 1 |
| CLH2_HUMAN (P53675) Clathrin heavy chain<br>2 (CLH-22) [MASS=187029]                                                                                                                                                                                                             | *    | 1.77  | *    | *    | *  | 2 |  | 1 | HLIMAVR                         | 1 |
|                                                                                                                                                                                                                                                                                  |      |       |      |      |    |   |  | 3 | HLIM[147]AVRGQFSTDELVAEVEKR     | 1 |
| CMC1_HUMAN (O75746) Calcium-binding<br>mitochondrial carrier protein Aralar1<br>(Mitochondrial aspartate glutamate carrier 1)<br>(Solute carrier family 25 member 12)<br>[MASS=74755]                                                                                            | 1.00 | 4.57  | 1.00 | 0.11 | 3  | 2 |  | 2 | DIPFSAIYFPVYAHC[339]K           | 1 |
|                                                                                                                                                                                                                                                                                  |      |       |      |      |    |   |  | 2 | AGQTTYSGVIDC[339]FRK            | 1 |
|                                                                                                                                                                                                                                                                                  |      |       |      |      |    |   |  | 2 | DIPFSAIYFPVYAHC[330]K           | 1 |
| CMGA_HUMAN (P10645) Chromogranin A<br>precursor (CgA) (Pituitary secretory protein I)<br>(SP-I) [Contains: Vasostatin-1 (Vasostatin I);<br>Vasostatin-2 (Vasostatin II); EA-92; ES-43;<br>Pancreastatin; SS-18; WA-8; WE-14; LF-19; AL-<br>11; GV-19; GR-44; ER-37] [MASS=50730] | *    | 3.72  | *    | *    | *  | 1 |  | 2 | HQNLKELQDLALQGAK                | 1 |
| CN104_HUMAN (Q9NVR5) Protein C14orf104<br>[MASS=36943]                                                                                                                                                                                                                           | 0.00 | 3.96  | 0.98 | 0.00 | 1  | 1 |  | 3 | LQEC[330]SNSDQLQGK              | 1 |
| CN152_HUMAN (Q8N9Y4) Protein C14orf152<br>[MASS=38753]                                                                                                                                                                                                                           | 0.00 | 14.69 | 2.61 | 0.00 | 1  | 3 |  | 2 | PVVLKPIPTK                      | 1 |
|                                                                                                                                                                                                                                                                                  |      |       |      |      |    |   |  | 2 | SPAFPGELAHLIC[339]KDVDGLGQK     | 1 |
|                                                                                                                                                                                                                                                                                  |      |       |      |      |    |   |  | 3 | KNC[330]KGLEPLGPETTLVSM[147]SPR | 1 |

|                                                                                                                                                                                         |      |       |      |      |    |   |   |                                         |   |
|-----------------------------------------------------------------------------------------------------------------------------------------------------------------------------------------|------|-------|------|------|----|---|---|-----------------------------------------|---|
|                                                                                                                                                                                         |      |       |      |      |    |   | 2 | RPPGVLHC[339]TTK                        | 2 |
|                                                                                                                                                                                         |      |       |      |      |    |   | 3 | AHITLGC[339]AADVEAVQTGLDLLEILR          | 1 |
|                                                                                                                                                                                         |      |       |      |      |    |   | 3 | DKPELQFPFLQDEDTVATLLEC[330]K            | 1 |
|                                                                                                                                                                                         |      |       |      |      |    |   | 2 | RLDEDLAAYC[330]R                        | 1 |
|                                                                                                                                                                                         |      |       |      |      |    |   | 2 | DKPELQFPFLQDEDTVATLLEC[339]K            | 1 |
|                                                                                                                                                                                         |      |       |      |      |    |   | 1 | FC[330]DYGK                             | 1 |
|                                                                                                                                                                                         |      |       |      |      |    |   | 2 | RLDEDLAAYC[339]R                        | 1 |
|                                                                                                                                                                                         |      |       |      |      |    |   | 2 | DKPELQFPFLQDEDTVATLLEC[330]K            | 3 |
| CN37_HUMAN (P09543) 2',3'-cyclic-nucleotide 3'-phosphodiesterase (EC 3.1.4.37) (CNP) (CNPase) [MASS=47578]                                                                              | 1.00 | 24.94 | 0.89 | 0.11 | 17 | 7 |   |                                         |   |
|                                                                                                                                                                                         |      |       |      |      |    |   | 2 | RPPGVLHC[330]TTK                        | 2 |
|                                                                                                                                                                                         |      |       |      |      |    |   | 2 | LDEDLAAYC[330]R                         | 1 |
|                                                                                                                                                                                         |      |       |      |      |    |   | 3 | PGLEKDFLPLYFGWFLTKK                     | 1 |
|                                                                                                                                                                                         |      |       |      |      |    |   | 2 | AHITLGC[339]AADVEAVQTGLDLLEILR          | 1 |
|                                                                                                                                                                                         |      |       |      |      |    |   | 1 | FC[339]DYGK                             | 1 |
|                                                                                                                                                                                         |      |       |      |      |    |   | 3 | AHITLGC[330]AADVEAVQTGLDLLEILR          | 1 |
|                                                                                                                                                                                         |      |       |      |      |    |   | 1 | LDEDLAAYC[330]R                         | 1 |
| CND1_HUMAN (Q15021) Condensin complex subunit 1 (Chromosome condensation-related SMC-associated protein 1) (Chromosome-associated protein D2) (hCAP-D2) (XCAP-D2 homolog) [MASS=157168] | 0.00 | 1.71  | 3.95 | 0.00 | 1  | 1 | 3 | VPAILMSSM[147]C[339]ILLDHLGGENYMM[147]R | 1 |
| CO2_HUMAN (P06681) Complement C2 precursor (EC 3.4.21.43) (C3/C5 convertase) [Contains: Complement C2b fragment; Complement C2a fragment] [MASS=83267]                                  | 0.00 | 2.66  | 0.60 | 0.00 | 1  | 1 | 3 | LTDTIC[330]GVGNMSANASDQER               | 1 |
| CO3A1_HUMAN (P02461) Collagen alpha-1(III) chain precursor [MASS=138554]                                                                                                                | *    | 2.11  | *    | *    | *  | 2 | 2 | GSPGPQGVK                               | 1 |
|                                                                                                                                                                                         |      |       |      |      |    |   | 3 | DGTSGHPGPIGPPGPRGNRGER                  | 1 |
| CO6A2_HUMAN (P12110) Collagen alpha-2(VI) chain precursor [MASS=108573]                                                                                                                 | 0.00 | 4.22  | 0.91 | 0.00 | 1  | 2 | 3 | IGPPGC[339]KGDGPNRGPDPGYPEAGSPGER       | 1 |
|                                                                                                                                                                                         |      |       |      |      |    |   | 3 | IIVMKHEAYGEC[339]YK                     | 1 |
|                                                                                                                                                                                         |      |       |      |      |    |   | 2 | VC[339]APVLAKPGVISVMGT                  | 1 |
|                                                                                                                                                                                         |      |       |      |      |    |   | 2 | GPIGSIQPK                               | 1 |
|                                                                                                                                                                                         |      |       |      |      |    |   | 3 | VIGLLAGQTYHVAVVC[330]YLRSQVR            | 1 |
| CO6A3_HUMAN (P12111) Collagen alpha-3(VI) chain precursor [MASS=343550]                                                                                                                 | 0.00 | 3.78  | 1.47 | 0.00 | 1  | 7 | 2 | VEFSLTDYGSKEKLVDFLSR                    | 1 |
|                                                                                                                                                                                         |      |       |      |      |    |   | 2 | LLPYIVGVAQRHIVLK                        | 1 |
|                                                                                                                                                                                         |      |       |      |      |    |   | 3 | QLINALQINNTAVGHVLPAGR                   | 1 |
|                                                                                                                                                                                         |      |       |      |      |    |   | 2 | PEFYLNYSYMNK                            | 1 |

|                                                                                                                                                                                                                                                                        |      |       |      |      |   |   |   |                                            |   |
|------------------------------------------------------------------------------------------------------------------------------------------------------------------------------------------------------------------------------------------------------------------------|------|-------|------|------|---|---|---|--------------------------------------------|---|
| CO9_HUMAN (P02748) Complement component C9 precursor [Contains: Complement component C9a; Complement component C9b] [MASS=63173]                                                                                                                                       | *    | 1.97  | *    | *    | * | 1 | 3 | GEIHLGRFVMR                                | 1 |
| COEA1_HUMAN (Q05707) Collagen alpha-1(XIV) chain precursor (Undulin) [MASS=193484]                                                                                                                                                                                     | 0.00 | 1.78  | 1.55 | 0.00 | 1 | 1 | 3 | GPPGHLGVPGPQGPGSQPGYC[339]DPSSC[339]SAYGVR | 1 |
| COF1_HUMAN (P23528) Cofilin-1 (Cofilin, non-muscle isoform) (18 kDa phosphoprotein) (p18) [MASS=18371]                                                                                                                                                                 | *    | 4.85  | *    | *    | * | 1 | 2 | MLPDKDC[330]JR                             | 1 |
|                                                                                                                                                                                                                                                                        |      |       |      |      |   |   | 1 | TLNKVAM[147]K                              | 5 |
| COPG2_HUMAN (Q9UBF2) Coatmer subunit gamma-2 (Gamma-2 coat protein) (Gamma-2 COP) [MASS=97622]                                                                                                                                                                         | *    | 0.92  | *    | *    | * | 1 |   |                                            |   |
| COX5B_HUMAN (P10606) Cytochrome c oxidase polypeptide Vb, mitochondrial precursor (EC 1.9.3.1) [MASS=13696]                                                                                                                                                            | 1.00 | 4.65  | 1.29 | 0.00 | 2 | 1 | 1 | C[330]GAHYK                                | 1 |
|                                                                                                                                                                                                                                                                        |      |       |      |      |   |   | 1 | C[339]GAHYK                                | 2 |
| COX7C_HUMAN (P15954) Cytochrome c oxidase polypeptide VIIc, mitochondrial precursor (EC 1.9.3.1) [MASS=7245]                                                                                                                                                           | 1.00 | 26.98 | 1.07 | 0.04 | 2 | 1 | 2 | M[147]C[330]LYFGSAFATPFLVVR                | 1 |
|                                                                                                                                                                                                                                                                        |      |       |      |      |   |   | 2 | MC[330]LYFGSAFATPFLVVR                     | 1 |
| CP27A_HUMAN (Q02318) Cytochrome P450 27, mitochondrial precursor (EC 1.14.13.15) (Cytochrome P-450C27/25) (Sterol 26-hydroxylase) (Sterol 27-hydroxylase) (Vitamin D(3) 25-hydroxylase) (5-beta-cholestane-3-alpha,7-alpha,12-alpha-triol 27-hydroxylase) [MASS=60234] | *    | 2.45  | *    | *    | * | 1 | 2 | RIAELEMQLLLAR                              | 1 |
| CP4X1_HUMAN (Q8N118) Cytochrome P450 4X1 (EC 1.14.14.1) (CYPIVX1) [MASS=58875]                                                                                                                                                                                         | 0.00 | 4.91  | 2.03 | 0.00 | 1 | 1 | 3 | IC[330]STQDTSVEVYEHINSM[147]SLDIIMK        | 1 |
| CP7A1_HUMAN (P22680) Cytochrome P450 7A1 (Cholesterol 7-alpha-monooxygenase) (CYPVII) (EC 1.14.13.17) (Cholesterol 7-alpha-hydroxylase) [MASS=57660]                                                                                                                   | *    | 2.58  | *    | *    | * | 1 | 2 | YVHFITNPLSYHK                              | 1 |
| CRTC_HUMAN (P27797) Calreticulin precursor (CRP55) (Calregulin) (HACBP) (ERp60) (grp60) [MASS=48141]                                                                                                                                                                   | 1.00 | 11.27 | 1.06 | 0.03 | 2 | 3 | 2 | KVHVIFNYK GK                               | 1 |
|                                                                                                                                                                                                                                                                        |      |       |      |      |   |   | 3 | C[339]KDDEFTHLYTLIVRPDNTYEVK               | 1 |
|                                                                                                                                                                                                                                                                        |      |       |      |      |   |   | 2 | HEQNIDC[330]GGGYVK                         | 1 |
| CSKI2_HUMAN (Q8WXE0) Caskin-2 [MASS=126710]                                                                                                                                                                                                                            | *    | 0.67  | *    | *    | * | 1 | 2 | RRSHLSR                                    | 1 |

|                                                                                                                                                                                                        |                             |       |      |      |   |   |   |                                         |   |
|--------------------------------------------------------------------------------------------------------------------------------------------------------------------------------------------------------|-----------------------------|-------|------|------|---|---|---|-----------------------------------------|---|
| CSMD1_HUMAN (Q96PZ7) CUB and sushi domain-containing protein 1 precursor (CUB and sushi multiple domains protein 1) [MASS=388867]                                                                      | *                           | 0.56  | *    | *    | * | 1 | 3 | YMVNDVLSFQC[339]EPGYTLQGR               | 1 |
| CSPG2_HUMAN (P13611) Versican core protein precursor (Large fibroblast proteoglycan) (Chondroitin sulfate proteoglycan core protein 2) (PG-M) (Glial hyaluronate-binding protein) (GHAP) [MASS=372817] | 1.00                        | 2.74  | 0.84 | 0.02 | 2 | 6 | 2 | VGKSPVVRGSLSGK                          | 1 |
|                                                                                                                                                                                                        |                             |       |      |      |   |   | 2 | AQC[339]GGGLLGVR                        | 1 |
|                                                                                                                                                                                                        |                             |       |      |      |   |   | 2 | FDAYC[330]FKPK                          | 1 |
|                                                                                                                                                                                                        |                             |       |      |      |   |   | 3 | TDEVVTLTPRIGPKVSLSPGPEQK                | 1 |
|                                                                                                                                                                                                        |                             |       |      |      |   |   | 2 | SFM[147]SLTTPTQSER                      | 1 |
| 2                                                                                                                                                                                                      | AVTADGFPTVSVM[147]LPLHSEQNK | 1     |      |      |   |   |   |                                         |   |
| CT012_HUMAN (Q9NVP4) Protein C20orf12 [MASS=62909]                                                                                                                                                     | *                           | 3.97  | *    | *    | * | 1 | 2 | HHEAIPVLVQRGADIDQQWGPLR                 | 1 |
| CT152_HUMAN (Q96M20) Uncharacterized protein C20orf152 [MASS=67512]                                                                                                                                    | 0.00                        | 5.03  | 1.95 | 0.00 | 1 | 2 | 3 | STIVC[339]M[147]EETEFLVVDR              | 1 |
|                                                                                                                                                                                                        |                             |       |      |      |   |   | 2 | THLSEYSPM[147]ERFK                      | 1 |
| CX020_HUMAN (Q8NDZ0) Protein CXorf20 [MASS=87918]                                                                                                                                                      | 0.00                        | 3.00  | 0.49 | 0.00 | 1 | 1 | 3 | TPPC[330]PVAHGDQIVSQINHPVHLRR           | 1 |
| CX022_HUMAN (Q6ZTR5) Protein CXorf22 [MASS=110392]                                                                                                                                                     | 0.00                        | 3.07  | 0.19 | 0.00 | 1 | 2 | 3 | LHENYYAM[147]YLKYLRSVR                  | 1 |
|                                                                                                                                                                                                        |                             |       |      |      |   |   | 2 | NQC[330]ELLPVTYHFK                      | 1 |
| CX6B1_HUMAN (P14854) Cytochrome c oxidase subunit VIb isoform 1 (EC 1.9.3.1) (COX VIb-1) [MASS=10061]                                                                                                  | 0.83                        | 12.94 | 0.96 | 0.00 | 1 | 1 | 2 | NC[330]WQNYLDFHR                        | 1 |
| CXB4_HUMAN (Q9NTQ9) Gap junction beta-4 protein (Connexin-30.3) (Cx30.3) [MASS=30419]                                                                                                                  | 0.00                        | 3.01  | 0.83 | 0.00 | 1 | 1 | 2 | C[330]MEIFGPR                           | 1 |
|                                                                                                                                                                                                        |                             |       |      |      |   |   | 3 | HGGEDYVFSLLTGYC[330]EPPTGVSLR           | 1 |
| CY1_HUMAN (P08574) Cytochrome c1, heme protein, mitochondrial precursor (Cytochrome c-1) [MASS=35390]                                                                                                  | 1.00                        | 18.46 | 1.22 | 0.01 | 6 | 4 | 1 | DVC[330]TFLR                            | 1 |
|                                                                                                                                                                                                        |                             |       |      |      |   |   | 1 | DVC[339]TFLR                            | 1 |
|                                                                                                                                                                                                        |                             |       |      |      |   |   | 2 | M[147]LMM[147]M[147]ALLVPLVYTIK         | 1 |
|                                                                                                                                                                                                        |                             |       |      |      |   |   | 2 | HLVGVC[330]YTEDEAK                      | 1 |
|                                                                                                                                                                                                        |                             |       |      |      |   |   | 3 | HGGEDYVFSLLTGYC[339]EPPTGVSLR           | 1 |
|                                                                                                                                                                                                        |                             |       |      |      |   |   | 2 | HLVGVC[339]YTEDEAK                      | 1 |
|                                                                                                                                                                                                        |                             |       |      |      |   |   | 2 | DVC[330]TFLR                            | 1 |
| DB136_HUMAN (Q30KP8) Beta-defensin 136 precursor (Defensin, beta 136) [MASS=8755]                                                                                                                      | 0.00                        | 37.18 | 3.18 | 0.00 | 1 | 1 | 3 | M[147]NLC[339]LSALLFFLVILLPSGKGMFGNDGVK | 1 |
| DCBD1_HUMAN (Q8N8Z6) Discoidin, CUB and LCCL domain-containing protein 1 precursor [MASS=77920]                                                                                                        | *                           | 2.66  | *    | *    | * | 1 | 2 | HQSAEFTISYDNEKEMTQK                     | 1 |

|                                                                                                                                                                                                                                                                             |      |      |      |      |   |   |   |                                             |   |
|-----------------------------------------------------------------------------------------------------------------------------------------------------------------------------------------------------------------------------------------------------------------------------|------|------|------|------|---|---|---|---------------------------------------------|---|
| DCC_HUMAN (P43146) Netrin receptor DCC precursor (Tumor suppressor protein DCC) (Colorectal cancer suppressor) [MASS=158455]                                                                                                                                                | 0.00 | 1.04 | 1.75 | 0.00 | 1 | 1 | 2 | C[339]EVIGPEPM[147]PTIHWQK                  | 1 |
| DCMC_HUMAN (O95822) Malonyl-CoA decarboxylase, mitochondrial precursor (EC 4.1.1.9) (MCD) [MASS=55003]                                                                                                                                                                      | 0.00 | 5.07 | 1.89 | 0.00 | 1 | 1 | 3 | TPAPAEGQC[339]ADFVSFYGGLAETAQR              | 1 |
| DCXR_HUMAN (Q7Z4W1) L-xylulose reductase (EC 1.1.1.10) (XR) (Dicarbonyl/L-xylulose reductase) (Kidney dicarbonyl reductase) (kiDCR) (Carbonyl reductase II) (Sperm surface protein P34H) [MASS=25913]                                                                       | 0.64 | 4.92 | 0.82 | 0.00 | 1 | 1 | 2 | AVTNHSVYC[330]STK                           | 1 |
| DDB1_HUMAN (Q16531) DNA damage-binding protein 1 (Damage-specific DNA-binding protein 1) (UV-damaged DNA-binding factor) (DDB p127 subunit) (DDBa) (UV-damaged DNA-binding protein 1) (UV-DDB 1) (Xeroderma pigmentosum group E-complementing protein) (XPCE) [MASS=126967] | *    | 1.05 | *    | *    | * | 1 | 3 | M[147]IGLRLYDGLFK                           | 1 |
| DDX31_HUMAN (Q9H8H2) Probable ATP-dependent RNA helicase DDX31 (EC 3.6.1.-) (DEAD box protein 31) (Helicain) [MASS=94086]                                                                                                                                                   | *    | 5.17 | *    | *    | * | 3 | 3 | SLHLGHVAKSFGLRDAPR                          | 1 |
|                                                                                                                                                                                                                                                                             |      |      |      |      |   |   | 2 | SHDQLNPK                                    | 1 |
|                                                                                                                                                                                                                                                                             |      |      |      |      |   |   | 2 | REGLPPGGGTRGSLVPTR                          | 1 |
| DEN2C_HUMAN (Q68D51) DENN domain-containing protein 2C [MASS=106865]                                                                                                                                                                                                        | 0.00 | 4.31 | 0.66 | 0.00 | 1 | 2 | 3 | EM[147]SPALVYPFM[147]RSVMEAPFPAPGRTITVK     | 1 |
|                                                                                                                                                                                                                                                                             |      |      |      |      |   |   | 2 | NESESNWVC[330]SR                            | 1 |
| DEPD5_HUMAN (O75140) DEP domain-containing protein 5 [MASS=177909]                                                                                                                                                                                                          | *    | 0.95 | *    | *    | * | 2 | 1 | VTLKDK                                      | 2 |
|                                                                                                                                                                                                                                                                             |      |      |      |      |   |   | 2 | M[147]PMKLTSNR                              | 1 |
| DGCR8_HUMAN (Q8WYQ5) DGCR8 protein (DiGeorge syndrome critical region 8) [MASS=86045]                                                                                                                                                                                       | *    | 4.66 | *    | *    | * | 2 | 3 | RNHGM[147]GDTSIK                            | 1 |
|                                                                                                                                                                                                                                                                             |      |      |      |      |   |   | 3 | METDESPSPLPC[330]GPAGEAVMESRAR              | 1 |
| DGKG_HUMAN (P49619) Diacylglycerol kinase gamma (EC 2.7.1.107) (Diglyceride kinase gamma) (DGK-gamma) (DAG kinase gamma) [MASS=88996]                                                                                                                                       | *    | 2.91 | *    | *    | * | 1 | 3 | LLPM[147]QVDGEPWM[147]QPC[339]C[330]TIKITHK | 1 |

|                                                                                                                                                                            |                     |       |      |      |    |   |   |                                               |   |
|----------------------------------------------------------------------------------------------------------------------------------------------------------------------------|---------------------|-------|------|------|----|---|---|-----------------------------------------------|---|
| DHE3_HUMAN (P00367) Glutamate dehydrogenase 1, mitochondrial precursor (EC 1.4.1.3) (GDH) [MASS=61397]                                                                     | 1.00                | 11.47 | 1.21 | 0.05 | 11 | 4 | 3 | AKPYEGSILEADC[339]DILIPAASEK                  | 1 |
|                                                                                                                                                                            |                     |       |      |      |    |   | 2 | AKPYEGSILEADC[339]DILIPAASEK                  | 1 |
|                                                                                                                                                                            |                     |       |      |      |    |   | 3 | IIKPC[339]NHVLSLSFPIR                         | 1 |
|                                                                                                                                                                            |                     |       |      |      |    |   | 3 | AKPYEGSILEADC[330]DILIPAASEK                  | 1 |
|                                                                                                                                                                            |                     |       |      |      |    |   | 2 | IIKPC[339]NHVLSLSFPIR                         | 1 |
|                                                                                                                                                                            |                     |       |      |      |    |   | 2 | IIKPC[330]NHVLSLSFPIR                         | 1 |
|                                                                                                                                                                            |                     |       |      |      |    |   | 2 | PC[339]NHVLSLSFPIR                            | 1 |
|                                                                                                                                                                            |                     |       |      |      |    |   | 2 | C[339]AVVDVPPFVGAK                            | 2 |
|                                                                                                                                                                            |                     |       |      |      |    |   | 2 | C[330]AVVDVPPFVGAK                            | 2 |
| DHPR_HUMAN (P09417) Dihydropteridine reductase (EC 1.5.1.34) (HDHPR) (Quinoid dihydropteridine reductase) [MASS=25803]                                                     | 0.91                | 5.33  | 0.80 | 0.00 | 1  | 1 | 2 | GAVHQLC[330]QSLAGK                            | 1 |
| DHSA_HUMAN (P31040) Succinate dehydrogenase [ubiquinone] flavoprotein subunit, mitochondrial precursor (EC 1.3.5.1) (Fp) (Flavoprotein subunit of complex II) [MASS=72691] | 1.00                | 15.06 | 1.13 | 0.06 | 7  | 5 | 3 | AGLPC[339]QDLEFVQFHPTGIYGAGC[339]LITEGC[339]R | 1 |
|                                                                                                                                                                            |                     |       |      |      |    |   | 3 | HVNGQDQIVPLYAC[339]GEAAC[339]ASVHGANR         | 1 |
|                                                                                                                                                                            |                     |       |      |      |    |   | 3 | AGLPC[330]QDLEFVQFHPTGIYGAGC[330]LITEGC[330]R | 1 |
|                                                                                                                                                                            |                     |       |      |      |    |   | 2 | AAFGLSEAGFNTAC[339]VTK                        | 3 |
|                                                                                                                                                                            |                     |       |      |      |    |   | 2 | VGSVLQEGC[339]GK                              | 1 |
| 3                                                                                                                                                                          | VGSVLQEGC[330]GKISK | 1     |      |      |    |   |   |                                               |   |
| DHSB_HUMAN (P21912) Succinate dehydrogenase [ubiquinone] iron-sulfur protein, mitochondrial precursor (EC 1.3.5.1) (Ip) (Iron-sulfur subunit of complex II) [MASS=31630]   | 1.00                | 7.14  | 1.09 | 0.10 | 4  | 2 | 2 | C[330]HTIM[147]NC[330]TR                      | 1 |
|                                                                                                                                                                            |                     |       |      |      |    |   | 2 | C[339]HTIMNC[339]TR                           | 1 |
|                                                                                                                                                                            |                     |       |      |      |    |   | 2 | C[339]GPM[147]VLDALIK                         | 1 |
|                                                                                                                                                                            |                     |       |      |      |    |   | 2 | C[339]HTIM[147]NC[339]TR                      | 1 |
| DHX8_HUMAN (Q14562) ATP-dependent RNA helicase DHX8 (EC 3.6.1.-) (DEAH box protein 8) (RNA helicase HRH1) [MASS=139314]                                                    | 0.00                | 4.18  | 1.34 | 0.00 | 1  | 3 | 2 | EAEM[147]DSIPMGLNKHVWDPLPDAEGR                | 1 |
|                                                                                                                                                                            |                     |       |      |      |    |   | 2 | FSNPWC[339]YENFIQARSLRR                       | 1 |
|                                                                                                                                                                            |                     |       |      |      |    |   | 1 | LDVVSC[339]GK                                 | 1 |
| DLDH_HUMAN (P09622) Dihydrolipoyl dehydrogenase, mitochondrial precursor (EC 1.8.1.4) (Dihydrolipoamide dehydrogenase) (Glycine cleavage system L protein) [MASS=54150]    | 1.00                | 2.55  | 0.88 | 0.01 | 2  | 1 | 2 | VC[330]HAHPTLSEAFR                            | 1 |
|                                                                                                                                                                            |                     |       |      |      |    |   | 2 | VC[339]HAHPTLSEAFR                            | 1 |
| DMPK_HUMAN (Q09013) Myotonin-protein kinase (EC 2.7.11.1) (Myotonic dystrophy protein kinase) (MDPK) (DM-kinase) (DMK) (DMPK) (MT-PK) [MASS=70357]                         | *                   | 3.29  | *    | *    | *  | 1 | 2 | GRQTEGGAFPLVSSALS GDPR                        | 1 |

|                                                                                                                                                                                                  |      |       |      |      |   |   |   |                                                                                                                                  |                       |
|--------------------------------------------------------------------------------------------------------------------------------------------------------------------------------------------------|------|-------|------|------|---|---|---|----------------------------------------------------------------------------------------------------------------------------------|-----------------------|
| DMXL2_HUMAN (Q8TDJ6) Protein DmX-like 2 (Rabconnectin-3) [MASS=339755]                                                                                                                           | *    | 1.09  | *    | *    | * | 2 | 3 | HLSRTISVSGSTAK<br>C[330]IAGEVAIVRDPDAGEGTK                                                                                       | 1<br>1                |
| DNMT1_HUMAN (P26358) DNA (cytosine-5)-methyltransferase 1 (EC 2.1.1.37) (Dnmt1) (DNA methyltransferase Hsal) (DNA MTase Hsal) (MCMT) (M.Hsal) [MASS=183164]                                      | 0.00 | 1.79  | 0.69 | 0.00 | 1 | 1 | 3 | VC[330]IDAETLEVGDGC[330]VSVIPDDSSKPLYLAR                                                                                         | 1                     |
| DOPD_HUMAN (P30046) D-dopachrome decarboxylase (EC 4.1.1.84) (D-dopachrome tautomerase) (Phenylpyruvate tautomerase II) [MASS=12580]                                                             | 0.00 | 27.35 | 0.48 | 0.00 | 1 | 1 | 3 | PGLAM[147]ALSGSTEPC[330]AQLSISSIGVVGTAEEDNR                                                                                      | 1                     |
| DPOLA_HUMAN (P09884) DNA polymerase alpha catalytic subunit (EC 2.7.7.7) [MASS=165912]                                                                                                           | *    | 2.19  | *    | *    | * | 3 | 3 | EM[147]KIDLNTGKETGTPISMK<br>1 AVDLISK<br>1 QEADSGK                                                                               | 1<br>1<br>1           |
| DPOLN_HUMAN (Q7Z5Q5) DNA polymerase nu (EC 2.7.7.7) [MASS=100306]                                                                                                                                | *    | 5.67  | *    | *    | * | 3 | 2 | AAIAQC[330]HQTGC[330]VVSIMGRR<br>1 VSLSAGR<br>2 QMALEEDTDDAEGYLNNGNSGALKK                                                        | 1<br>1<br>1           |
| DPYL2_HUMAN (Q16555) Dihydropyrimidinase-related protein 2 (DRP-2) (Collapsin response mediator protein 2) (CRMP-2) (N2A3) [MASS=62293]                                                          | 1.00 | 11.54 | 0.85 | 0.08 | 4 | 4 | 2 | AITIANQTNC[339]PLYITK<br>2 FQLTDC[330]QIYEVLVSVIR<br>2 FQLTDC[339]QIYEVLVSVIR<br>2 TTQRIVAPPGGRANITSLG<br>2 GLYDGPVC[330]EVSVTPK | 1<br>1<br>1<br>1<br>1 |
| DUOX1_HUMAN (Q9NRD9) Dual oxidase 1 precursor (EC 1.6.3.1) (EC 1.11.1.-) (NADPH thyroid oxidase 1) (Thyroid oxidase 1) (Large NOX 1) (Long NOX 1) [MASS=177234]                                  | 0.22 | 2.19  | *    | *    | * | 2 | 2 | IGVFSC[330]GPPGMTK<br>2 NASC[339]HFQGVINRNSSVSRALR                                                                               | 2<br>1                |
| DUOX2_HUMAN                                                                                                                                                                                      | 0.22 | 1.29  | 0.46 | 0.09 | 2 | 1 | 3 | DMGLPSYSQALLAFGLDIPR<br>3 AWM[147]VVIGRHC[330]JNK<br>2 QKYDPPLAR                                                                 | 1<br>1<br>1           |
| DYH5_HUMAN (Q8TE73) Ciliary dynein heavy chain 5 (Axonemal beta dynein heavy chain 5) (HL1) [MASS=529002]                                                                                        | 0.00 | 1.88  | 0.83 | 0.00 | 1 | 6 | 3 | DLLLNDWRKEMK<br>2 EVVQC[330]MGSFQDGVAEK<br>2 IKM[147]LPTPAK<br>3 QAELDVVQAEYEQAM[147]TEKQTLLLEDAERC[330]R                        | 1<br>1<br>1<br>1      |
| DYL1_HUMAN (P63167) Dynein light chain 1, cytoplasmic (Dynein light chain LC8-type 1) (8 kDa dynein light chain) (DLC8) (Protein inhibitor of neuronal nitric oxide synthase) (PIN) [MASS=10366] | 0.80 | 12.36 | 0.72 | 0.00 | 1 | 1 | 2 | YNPTWHC[339]IVGR                                                                                                                 | 1                     |
| DYN1_HUMAN (Q05193) Dynamin-1 (EC 3.6.5.5) [MASS=97407]                                                                                                                                          | 0.38 | 3.94  | 1.26 | 0.00 | 1 | 2 | 2 | FPFELVKM[147]EFDEK<br>3 RPLVLQLVNATTEYAEFLHC[339]K                                                                               | 1<br>1                |

|                                                                                                                                                                                                                                                              |      |       |      |      |   |   |   |   |                                                                                                                      |                  |
|--------------------------------------------------------------------------------------------------------------------------------------------------------------------------------------------------------------------------------------------------------------|------|-------|------|------|---|---|---|---|----------------------------------------------------------------------------------------------------------------------|------------------|
| E2AK4_HUMAN (Q9P2K8) Eukaryotic translation initiation factor 2-alpha kinase 4 (EC 2.7.11.1) (GCN2-like protein) [MASS=186837]                                                                                                                               | *    | 2.00  | *    | *    | * | 2 | 3 | 3 | QERLEIASLSNQDHTSK<br>PAGPGTTPPDSGLAK                                                                                 | 1<br>1           |
| E2F1_HUMAN (Q01094) Transcription factor E2F1 (E2F-1) (Retinoblastoma-binding protein 3) (RBBP-3) (PRB-binding protein E2F-1) (PBR3) (Retinoblastoma-associated protein 1) (RBAP-1) [MASS=46920]                                                             | *    | 4.81  | *    | *    | * | 1 | 2 | 2 | RLDLETDHQYLAESSGPARGR                                                                                                | 1                |
| EAA2_HUMAN (P43004) Excitatory amino acid transporter 2 (Sodium-dependent glutamate/aspartate transporter 2) [MASS=62104]                                                                                                                                    | 1.00 | 8.54  | 0.91 | 0.02 | 3 | 4 | 2 | 2 | NLFPENLVQAC[330]FQQIQTGTK<br>KQLGPGKK                                                                                | 1<br>1           |
| EAA4_HUMAN (P48664) Excitatory amino acid transporter 4 (Sodium-dependent glutamate/aspartate transporter) [MASS=61565]                                                                                                                                      | 0.00 | 3.37  | *    | *    | * | 2 | 2 | 1 | M[147]VIKKGLEFK<br>NLFPENLVQAC[339]FQQIQTGTK<br>C[339]LEENLGIDKR                                                     | 1<br>1<br>1      |
| ECH1_HUMAN (Q13011) Delta3,5-delta2,4-dienoyl-CoA isomerase, mitochondrial precursor (EC 5.3.3.-) [MASS=35816]                                                                                                                                               | 1.00 | 3.35  | 0.96 | 0.00 | 1 | 1 | 2 | 2 | YC[330]AQDAFFQVK                                                                                                     | 1                |
| ECHA_HUMAN (P40939) Trifunctional enzyme subunit alpha, mitochondrial precursor (TP-alpha) (78 kDa gastrin-binding protein) [Includes: Long-chain enoyl-CoA hydratase (EC 4.2.1.17); Long chain 3-hydroxyacyl-CoA dehydrogenase (EC 1.1.1.211)] [MASS=82999] | 1.00 | 9.70  | 1.18 | 0.04 | 3 | 4 | 1 | 2 | 2                                                                                                                    | 1                |
| ECHB_HUMAN (P55084) Trifunctional enzyme subunit beta, mitochondrial precursor [Includes: 3-ketoacyl-CoA thiolase (EC 2.3.1.16) (Acetyl-CoA acyltransferase) (Beta-ketothiolase)] [MASS=51395]                                                               | 0.98 | 11.37 | 2.45 | 0.00 | 1 | 2 | 3 | 2 | ALM[147]GLYHGQVLC[339]K<br>C[339]LAPM[147]M[147]SEVIR<br>TVLGTPEVLLGALPGAGGTQR<br>EVEAVIPDHC[339]IFASNTSALPISEIAAVSK | 1<br>1<br>1<br>1 |
| ECHM_HUMAN (P30084) Enoyl-CoA hydratase, mitochondrial precursor (EC 4.2.1.17) (Short chain enoyl-CoA hydratase) (SCEH) (Enoyl-CoA hydratase 1) [MASS=31387]                                                                                                 | 1.00 | 6.21  | 1.08 | 0.00 | 2 | 1 | 2 | 2 | AYLRDFM[147]YVSQDPKQQLLGPYATPK<br>EGGQYGLVAAC[339]AAGGQGHAM[147]IVEAYPK                                              | 1<br>1           |
|                                                                                                                                                                                                                                                              |      |       |      |      |   |   |   |   | ALNALC[330]DGLIDELNQALK<br>ALNALC[339]DGLIDELNQALK                                                                   | 1<br>1           |



|                                                                                                                                                                                                                                                                   |      |      |       |      |   |   |   |                                   |   |
|-------------------------------------------------------------------------------------------------------------------------------------------------------------------------------------------------------------------------------------------------------------------|------|------|-------|------|---|---|---|-----------------------------------|---|
| EF1A1_HUMAN (P68104) Elongation factor 1-alpha 1 (EF-1-alpha-1) (Elongation factor 1 A-1) (eEF1A-1) (Elongation factor Tu) (EF-Tu) [MASS=50141]                                                                                                                   | 0.99 | 9.09 | 1.18  | 0.00 | 1 | 2 | 3 | RYEIIVKEVSTYIK                    | 1 |
|                                                                                                                                                                                                                                                                   |      |      |       |      |   |   | 3 | DGNASGTTLLEALDC[330]ILPPTRPTDKPLR | 1 |
| EF2_HUMAN (P13639) Elongation factor 2 (EF-2) [MASS=95206]                                                                                                                                                                                                        | *    | 2.92 | *     | *    | * | 1 | 2 | TGTITTFEHAHNMRVMKFSVSPVVR         | 1 |
| EFG2_HUMAN (Q969S9) Elongation factor G2, mitochondrial precursor (mEF-G 2) (Elongation factor G2) [MASS=86600]                                                                                                                                                   | 0.00 | 1.93 | 0.33  | 0.00 | 1 | 1 | 2 | QADKHNIPRIC[330]FLNK              | 1 |
|                                                                                                                                                                                                                                                                   |      |      |       |      |   |   | 2 | KGDEC[339]ELLGHSK                 | 1 |
| EFTU_HUMAN (P49411) Elongation factor Tu, mitochondrial precursor (EF-Tu) (P43) [MASS=49541]                                                                                                                                                                      | 1.00 | 5.97 | 1.13  | 0.05 | 7 | 2 | 1 | KGDEC[339]ELLGHSK                 | 1 |
|                                                                                                                                                                                                                                                                   |      |      |       |      |   |   | 3 | HYAHTDC[339]PGHADYVK              | 1 |
|                                                                                                                                                                                                                                                                   |      |      |       |      |   |   | 2 | HYAHTDC[339]PGHADYVK              | 2 |
|                                                                                                                                                                                                                                                                   |      |      |       |      |   |   | 2 | HYAHTDC[330]PGHADYVK              | 2 |
| EGLN2_HUMAN (Q96KS0) Egl nine homolog 2 (EC 1.14.11.-) (Hypoxia-inducible factor prolyl hydroxylase 1) (HIF-prolyl hydroxylase 1) (HIF-PH1) (HPH-3) (Prolyl hydroxylase domain-containing protein 1) (PHD1) (Estrogen-induced tag 6) [MASS=43650]                 | *    | 3.19 | *     | *    | * | 1 | 1 | VLA EVEALKRGGGR                   | 1 |
| EHMT2_HUMAN (Q96KQ7) Histone-lysine N-methyltransferase, H3 lysine-9 specific 3 (EC 2.1.1.43) (Histone H3-K9 methyltransferase 3) (H3-K9-HMTase 3) (Euchromatic histone-lysine N-methyltransferase 2) (HLA-B-associated transcript 8) (Protein G9a) [MASS=132383] | 0.00 | 2.07 | 0.30  | 1.28 | 2 | 2 | 1 | KREPPR                            | 1 |
|                                                                                                                                                                                                                                                                   |      |      |       |      |   |   | 3 | C[330]DLHAVNYHGDTPHIAAR           | 2 |
| EMAL4_HUMAN (Q9HC35) Echinoderm microtubule-associated protein-like 4 (EMAP-4) (Restrictedly overexpressed proliferation-associated protein) (Ropp 120) [MASS=108902]                                                                                             | 0.00 | 2.75 | 0.90  | 0.00 | 1 | 1 | 3 | FVQC[330]LAFLNGDVLGTGDSGGVMLIWSK  | 1 |
| EMIL1_HUMAN (Q9Y6C2) EMILIN-1 precursor (Elastin microfibril interface-located protein 1) (Elastin microfibril interfacier 1) [MASS=106694]                                                                                                                       | 0.00 | 3.44 | 28.18 | 0.00 | 1 | 2 | 3 | LGRLEGVC[339]ER                   | 1 |
|                                                                                                                                                                                                                                                                   |      |      |       |      |   |   | 2 | LQDRVDAQDETAEEFTLRLNLTAAR         | 1 |

|                                                                                                                                                                                                                                                    |      |       |      |      |   |   |                  |                                                                                                                                   |                  |
|----------------------------------------------------------------------------------------------------------------------------------------------------------------------------------------------------------------------------------------------------|------|-------|------|------|---|---|------------------|-----------------------------------------------------------------------------------------------------------------------------------|------------------|
| ENOA_HUMAN (P06733) Alpha-enolase (EC 4.2.1.11) (2-phospho-D-glycerate hydro-lyase) (Non-neural enolase) (NNE) (Enolase 1) (Phosphopyruvate hydratase) (C-myc promoter-binding protein) (MBP-1) (MPB-1) (Plasminogen-binding protein) [MASS=47037] | 0.97 | 5.08  | 1.35 | 0.00 | 1 | 1 | 2                | SGETEDTFIADLVVGLC[339]TGQIK                                                                                                       | 1                |
| ENOB_HUMAN (P13929) Beta-enolase (EC 4.2.1.11) (2-phospho-D-glycerate hydro-lyase) (Muscle-specific enolase) (MSE) (Skeletal muscle enolase) (Enolase 3) [MASS=46855]                                                                              | 0.97 | 8.31  | *    | *    | * | 2 | 3<br>2           | GRFRAAVPSGASTGIYEALELR<br>LAQSNWGWVMVSHR                                                                                          | 1<br>1           |
| ENOG_HUMAN (P09104) Gamma-enolase (EC 4.2.1.11) (2-phospho-D-glycerate hydro-lyase) (Neural enolase) (Neuron-specific enolase) (NSE) (Enolase 2) [MASS=47137]                                                                                      | 0.97 | 3.23  | *    | *    | * | 1 | 3                | IVIGM[147]DVAASEFYR                                                                                                               | 1                |
| EP400_HUMAN (Q96L91) E1A-binding protein p400 (EC 3.6.1.-) (p400 kDa SWI2/SNF2-related protein) (Domino homolog) (hDomino) (CAG repeat protein 32) (Trinucleotide repeat-containing gene 12 protein) [MASS=343645]                                 | *    | 0.73  | *    | *    | * | 2 | 3<br>1           | RQQAM[147]PSTGM[147]AEQSKR<br>VPAVRLK                                                                                             | 1<br>1           |
| EPC1_HUMAN (Q9H2F5) Enhancer of polycomb homolog 1 [MASS=93463]                                                                                                                                                                                    | *    | 1.79  | *    | *    | * | 1 | 3                | NC[339]RGPSLIPSVKQEK                                                                                                              | 1                |
| EPHA4_HUMAN (P54764) Ephrin type-A receptor 4 precursor (EC 2.7.10.1) (Tyrosine-protein kinase receptor SEK) (Receptor protein-tyrosine kinase HEK8) [MASS=109859]                                                                                 | *    | 2.03  | *    | *    | * | 1 | 3                | PNGVILEYEVKYYEKDQNER                                                                                                              | 1                |
| ERAL_HUMAN (O75616) GTP-binding protein era homolog (hERA) (ERA-W) (Conserved ERA-like GTPase) (CEGA) [MASS=48350]                                                                                                                                 | *    | 3.20  | *    | *    | * | 1 | 3                | VLRVLLGAPNAGK                                                                                                                     | 1                |
| ES1_HUMAN (P30042) ES1 protein homolog, mitochondrial precursor (Protein KNP-I) (Protein GT335) [MASS=28142]                                                                                                                                       | 1.00 | 32.46 | 1.30 | 0.03 | 2 | 4 | 3<br>3<br>2<br>3 | EFHQAGKPIGLC[339]C[339]IAPVLAAK<br>VVTTPAFMC[339]ETALHYIHDGIGAMVRK<br>NLSTFAVDGKDC[339]K<br>NKVVTTPAFM[147]C[330]ETALHYIHDGIGAMVR | 1<br>1<br>1<br>1 |

|                                                                                                                                                                                                                                                 |      |       |      |      |   |   |   |                                         |   |
|-------------------------------------------------------------------------------------------------------------------------------------------------------------------------------------------------------------------------------------------------|------|-------|------|------|---|---|---|-----------------------------------------|---|
| ETFD_HUMAN (Q16134) Electron transfer flavoprotein-ubiquinone oxidoreductase, mitochondrial precursor (EC 1.5.5.1) (ETF-QO) (ETF-ubiquinone oxidoreductase) (ETF dehydrogenase) (Electron-transferring-flavoprotein dehydrogenase) [MASS=68507] | 0.96 | 1.94  | 0.93 | 0.00 | 1 | 1 | 2 | LQINAQNC[339]VHC[339]K                  | 1 |
| EXOC3_HUMAN (O60645) Exocyst complex component 3 (Exocyst complex component Sec6) [MASS=86844]                                                                                                                                                  | 0.46 | 1.06  | 0.99 | 0.00 | 1 | 1 | 2 | LM[147]DLEC[339]SR                      | 1 |
| EXOS1_HUMAN (Q9Y3B2) 3'-5' exoribonuclease CSL4 homolog (EC 3.1.13.-) (Exosome component 1) [MASS=21452]                                                                                                                                        | *    | 9.74  | *    | *    | * | 1 | 2 | FAKVHILYVGSM[147]PLKNSFR                | 1 |
| EXOS5_HUMAN (Q9NQT4) Exosome complex exonuclease RRP46 (EC 3.1.13.-) (Ribosomal RNA-processing protein 46) (Exosome component 5) (p12B) (Chronic myelogenous leukemia tumor antigen 28) [MASS=25249]                                            | 0.00 | 11.49 | 0.73 | 0.00 | 1 | 2 | 2 | EIFNKATLEVILR                           | 1 |
|                                                                                                                                                                                                                                                 |      |       |      |      |   |   | 2 | NTC[339]EAVVLGTLHPR                     | 1 |
| FA53B_HUMAN (Q14153) Protein FAM53B [MASS=45796]                                                                                                                                                                                                | 0.00 | 5.69  | 0.48 | 0.00 | 1 | 1 | 2 | MVMVLSESLSTRGADSIAC[330]GTFSR           | 1 |
| FANCM_HUMAN (Q8IYD8) Fanconi anemia group M protein (EC 3.6.1.-) (ATP-dependent RNA helicase FANCM) (Protein FACM) (Fanconi anemia-associated polypeptide of 250 kDa) (FAAP250) (Protein Hef ortholog) [MASS=232190]                            | *    | 0.88  | *    | *    | * | 2 | 1 | VSKEIK                                  | 2 |
|                                                                                                                                                                                                                                                 |      |       |      |      |   |   | 2 | M[147]VPDGINPKLHK                       | 1 |
| FARP1_HUMAN (Q9Y4F1) FERM, RhoGEF and pleckstrin domain-containing protein 1 (Chondrocyte-derived ezrin-like protein) [MASS=118632]                                                                                                             | *    | 2.49  | *    | *    | * | 1 | 3 | PDANSAYQDTLEFLMASRDFC[339]KSFWK         | 1 |
| FBN1_HUMAN (P35555) Fibrillin-1 precursor [MASS=312312]                                                                                                                                                                                         | 0.00 | 2.26  | 5.23 | 0.00 | 1 | 4 | 2 | PGYRFTSTGQC[330]NDR                     | 1 |
|                                                                                                                                                                                                                                                 |      |       |      |      |   |   | 2 | GPGFATKEITNGKPFFK                       | 1 |
|                                                                                                                                                                                                                                                 |      |       |      |      |   |   | 3 | M[147]IPSLC[339]THGK                    | 1 |
|                                                                                                                                                                                                                                                 |      |       |      |      |   |   | 3 | QIC[330]PYGSGIIVGPDDSAVDM[147]DEC[339]K | 1 |
| FBN2_HUMAN (P35556) Fibrillin-2 precursor [MASS=314347]                                                                                                                                                                                         | *    | 0.79  | *    | *    | * | 2 | 2 | AFPGM[147]C[339]TYGKC[339]R             | 1 |
|                                                                                                                                                                                                                                                 |      |       |      |      |   |   | 2 | C[339]EVNINGATLK                        | 1 |
|                                                                                                                                                                                                                                                 |      |       |      |      |   |   | 1 | ELSVSGK                                 | 2 |
| FBX38_HUMAN (Q6PIJ6) F-box only protein 38 (Modulator of KLF7 activity homolog) (MoKA) [MASS=133953]                                                                                                                                            | *    | 2.61  | *    | *    | * | 3 | 1 | VVRVVDLC[330]AGR                        | 1 |
|                                                                                                                                                                                                                                                 |      |       |      |      |   |   | 3 | KLNMDQVLDQILR                           | 1 |

|                                                                                                                                                                                                               |      |       |      |      |   |   |             |                                                                     |             |
|---------------------------------------------------------------------------------------------------------------------------------------------------------------------------------------------------------------|------|-------|------|------|---|---|-------------|---------------------------------------------------------------------|-------------|
| FBX40_HUMAN (Q9UH90) F-box only protein 40 (Muscle disease-related protein) [MASS=79663]                                                                                                                      | 0.00 | 2.54  | 7.36 | 0.00 | 1 | 2 | 2           | SC[339]PFNIVEHK<br>VPVSYC[339]GK                                    | 1<br>1      |
| FBX47_HUMAN (Q5MNV8) F-box only protein 47 [MASS=51996]                                                                                                                                                       | 0.00 | 3.32  | 1.81 | 0.00 | 1 | 1 | 2           | LKYIHKILTEVSC[339]FK                                                | 1           |
| FGFR1_HUMAN (P11362) Basic fibroblast growth factor receptor 1 precursor (EC 2.7.10.1) (FGFR-1) (bFGF-R) (Fms-like tyrosine kinase 2) (c-fgr) (CD331 antigen) [MASS=91867]                                    | *    | 4.99  | *    | *    | * | 3 | 2<br>2<br>2 | GM[147]EYLASKKC[339]IHR<br>LHAVPAAKTVKFK<br>M[147]PVAPYWTSPEKMEK    | 1<br>1<br>1 |
| FGFR2_HUMAN (P21802) Fibroblast growth factor receptor 2 precursor (EC 2.7.10.1) (FGFR-2) (Keratinocyte growth factor receptor 2) (CD332 antigen) [MASS=92024]                                                | *    | 1.71  | *    | *    | * | 1 | 2           | FRC[339]PAGGNPMTM[147]R                                             | 1           |
| FGRL1_HUMAN (Q8N441) Fibroblast growth factor receptor-like 1 precursor (FGF receptor-like protein 1) (Fibroblast growth factor receptor 5) (FGFR-like protein) (FGF homologous factor receptor) [MASS=54536] | *    | 3.37  | *    | *    | * | 1 | 2           | PVGSSVRLKC[330]VASGHPR                                              | 1           |
| FKB1B_HUMAN (P68106) FK506-binding protein 1B (EC 5.2.1.8) (Peptidyl-prolyl cis-trans isomerase 1B) (PPIase 1B) (Rotamase 1B) (12.6 kDa FKBP) (FKBP-12.6) (Immunophilin FKBP12.6) (h-FKBP-12) [MASS=11651]    | 0.00 | 15.89 | 4.95 | 0.00 | 1 | 1 | 3           | KGQTC[339]VVHYTGM[147]LQNGK                                         | 1           |
| FNBP2_HUMAN (O75044) SLIT-ROBO Rho GTPase-activating protein 2 (srGAP2) (Formin-binding protein 2) [MASS=120880]                                                                                              | *    | 0.84  | *    | *    | * | 1 | 1           | KTATAGRSK                                                           | 1           |
| FOG2_HUMAN (Q8WW38) Zinc finger protein ZFPM2 (Zinc finger protein multitype 2) (Friend of GATA protein 2) (FOG-2) (hFOG-2) [MASS=128142]                                                                     | *    | 2.87  | *    | *    | * | 3 | 3<br>1<br>1 | HLETSLTINKC[330]VPVSK<br>ISFNK<br>AQVPM[147]VLTAGPK                 | 1<br>1<br>1 |
| FRS3_HUMAN (O43559) Fibroblast growth factor receptor substrate 3 (FGFR substrate 3) (Suc1-associated neurotrophic factor target 2) (SNT-2) (FGFR signaling adaptor SNT2) [MASS=54330]                        | 0.00 | 11.20 | 0.54 | 0.00 | 1 | 2 | 3<br>3      | VTNVDDEGVELGSGVM[147]ELTQSELVHLHRR<br>APQPPNALGYTVSSFSNGC[330]PGEGR | 1<br>1      |

|                                                                                                                                                                                                                                                                             |      |       |      |      |   |   |   |                                      |   |
|-----------------------------------------------------------------------------------------------------------------------------------------------------------------------------------------------------------------------------------------------------------------------------|------|-------|------|------|---|---|---|--------------------------------------|---|
| FUBP2_HUMAN (Q92945) Far upstream element-binding protein 2 (FUSE-binding protein 2) (KH type-splicing regulatory protein) (KSRP) (p75) [MASS=72709]                                                                                                                        | 0.00 | 4.24  | 0.32 | 0.00 | 1 | 1 | 2 | GGGGPC[330]GGGPGGGSAGGPSQPPGGGGPGIR  | 1 |
| FVT1_HUMAN (Q06136) 3-ketodihydrospingosine reductase precursor (EC 1.1.1.102) (3-dehydrospinganine reductase) (KDS reductase) (Follicular variant translocation protein 1) (FVT-1) [MASS=36187]                                                                            | 0.93 | 4.82  | 1.11 | 0.00 | 1 | 1 | 2 | LISSETTSVC[339]KPEQVAK               | 1 |
| FXL19_HUMAN (Q6PCT2) F-box/LRR-repeat protein 19 (F-box and leucine-rich repeat protein 19) [MASS=73770]                                                                                                                                                                    | 0.00 | 7.72  | 0.61 | 0.00 | 1 | 3 | 2 | VGGDAC[330]LLRGSDPGGPGLLPPR          | 1 |
|                                                                                                                                                                                                                                                                             |      |       |      |      |   |   | 3 | WIEDVKDSQLR                          | 1 |
|                                                                                                                                                                                                                                                                             |      |       |      |      |   |   | 2 | KGPLPAGPPPEVPGPPKR                   | 1 |
| G3P_HUMAN (P04406) Glyceraldehyde-3-phosphate dehydrogenase (EC 1.2.1.12) (GAPDH) [MASS=35922]                                                                                                                                                                              | 0.99 | 4.19  | 0.94 | 0.00 | 1 | 1 | 2 | VPTANVSVVDLTC[330]JR                 | 1 |
| G6PD_HUMAN (P11413) Glucose-6-phosphate 1-dehydrogenase (EC 1.1.1.49) (G6PD) [MASS=59134]                                                                                                                                                                                   | 0.31 | 2.14  | 1.42 | 0.00 | 1 | 1 | 2 | DNIAC[339]VILTFK                     | 1 |
| GABT_HUMAN (P80404) 4-aminobutyrate aminotransferase, mitochondrial precursor (EC 2.6.1.19) ((S)-3-amino-2-methylpropionate transaminase) (EC 2.6.1.22) (Gamma-amino-N-butyrate transaminase) (GABA transaminase) (GABA aminotransferase) (GABA-AT) (GABA-T) ( [MASS=56439] | 0.75 | 2.80  | 1.21 | 0.00 | 1 | 1 | 2 | GTFC[339]SFDTPDDSIR                  | 1 |
| GAS6_HUMAN (Q14393) Growth-arrest-specific protein 6 precursor (GAS-6) [MASS=79676]                                                                                                                                                                                         | 0.00 | 4.30  | 0.51 | 0.00 | 1 | 1 | 3 | APQLLLLLLAAEC[330]ALAALLPAREATQFLRPR | 1 |
| GASP1_HUMAN (Q5JY77) G-protein coupled receptor-associated sorting protein 1 (GASP-1) [MASS=156850]                                                                                                                                                                         | 0.00 | 2.22  | 2.61 | 0.00 | 1 | 2 | 3 | M[147]TGAEIESGAQVKPEK                | 1 |
|                                                                                                                                                                                                                                                                             |      |       |      |      |   |   | 3 | EPC[339]M[147]YPAGGGSWKSR            | 1 |
|                                                                                                                                                                                                                                                                             |      |       |      |      |   |   | 2 | LFVSGAC[330]DASAK                    | 2 |
| GBB1_HUMAN (P62873) Guanine nucleotide-binding protein G(I)/G(S)/G(T) subunit beta 1 (Transducin beta chain 1) [MASS=37246]                                                                                                                                                 | 1.00 | 18.58 | 0.99 | 0.06 | 6 | 4 | 2 | KAC[330]ADATLSQITNNIDPVGR            | 1 |
|                                                                                                                                                                                                                                                                             |      |       |      |      |   |   | 2 | ELAGHTGYLSC[339]C[339]R              | 1 |
|                                                                                                                                                                                                                                                                             |      |       |      |      |   |   | 2 | LLLAGYDDFNC[339]NVVDALK              | 1 |
|                                                                                                                                                                                                                                                                             |      |       |      |      |   |   | 2 | ELAGHTGYLSC[330]C[330]R              | 1 |

|                                                                                                                                                                                                                                                 |      |       |      |      |   |   |                                                                                                                         |                         |   |
|-------------------------------------------------------------------------------------------------------------------------------------------------------------------------------------------------------------------------------------------------|------|-------|------|------|---|---|-------------------------------------------------------------------------------------------------------------------------|-------------------------|---|
| GBB2_HUMAN (P62879) Guanine nucleotide-binding protein G(I)/G(S)/G(T) subunit beta 2 (Transducin beta chain 2) (G protein beta 2 subunit) [MASS=37200]                                                                                          | 0.99 | 3.83  | 0.92 | 0.00 | 1 | 1 | 2                                                                                                                       | ELPGHTGYLSC[339]C[339]R | 1 |
| GBRR1_HUMAN (P24046) Gamma-aminobutyric-acid receptor rho-1 subunit precursor (GABA(A) receptor) [MASS=55257]                                                                                                                                   | *    | 3.59  | *    | *    | * | 1 | 2                                                                                                                       | SPDITKSPLTKSEQLLR       | 1 |
| GCP2_HUMAN (Q9BSJ2) Gamma-tubulin complex component 2 (GCP-2) (Spindle pole body protein Spc97 homolog) (hSpc97) (hGCP2) (h103p) [MASS=102533]                                                                                                  | 0.00 | 7.54  | 0.07 | 0.00 | 1 | 4 | 2 WPLSLIINRKALTR<br>3 YLNVVREC[330]GHDVTC[339]PVAK<br>3 VFSKLM SVC[330]VM[147]FTNC[330]M[147]QKFTQSMK<br>1 AASAPYFEVLEK | 1<br>1<br>1<br>1        |   |
| GDIA_HUMAN (P31150) Rab GDP dissociation inhibitor alpha (Rab GDI alpha) (Guanosine diphosphate dissociation inhibitor 1) (GDI-1) (XAP-4) (Oligophrenin-2) [MASS=50582]                                                                         | *    | 1.34  | *    | *    | * | 1 | 1                                                                                                                       | GGKIYK                  | 1 |
| GEMI5_HUMAN (Q8TEQ6) Gem-associated protein 5 (Gemin5) [MASS=168560]                                                                                                                                                                            | 0.00 | 2.59  | 0.69 | 0.00 | 1 | 2 | 3 IVFNLC[330]PLQTEDDKQLLLSTSM[147]DRDVK<br>2 SLLPLSTSLDHR                                                               | 1<br>1                  |   |
| GFRA2_HUMAN (O00451) GDNF family receptor alpha-2 precursor (GFR-alpha-2) (Neurturin receptor alpha) (NTNR-alpha) (NRTNR-alpha) (TGF-beta-related neurotrophic factor receptor 2) (GDNF receptor beta) (GDNFR-beta) (RET ligand 2) [MASS=51558] | *    | 6.47  | *    | *    | * | 2 | 2 PNSGPSRAR<br>3 QTILPSC[339]SYEDKEKPNC[330]LDLR                                                                        | 1<br>1                  |   |
| GHC1_HUMAN (Q9H936) Mitochondrial glutamate carrier 1 (GC-1) (Glutamate/H(+)-symporter 1) (Solute carrier family 25 member 22) [MASS=34470]                                                                                                     | 1.00 | 10.22 | 1.04 | 0.02 | 3 | 2 | 2 LINGGIAGLIGVTC[339]VFPIDLAK<br>2 VYTSM[147]SDC[339]LIK<br>2 LINGGIAGLIGVTC[330]VFPIDLAK                               | 1<br>1<br>1             |   |
| GLRX5_HUMAN (Q86SX6) Glutaredoxin-related protein 5 [MASS=16628]                                                                                                                                                                                | 1.00 | 12.10 | 1.45 | 0.00 | 1 | 1 | 2                                                                                                                       | GTPEQPQC[339]GFSNAVQILR | 1 |

|                                                                                                                                                                     |      |       |       |      |    |   |  |   |                                            |   |
|---------------------------------------------------------------------------------------------------------------------------------------------------------------------|------|-------|-------|------|----|---|--|---|--------------------------------------------|---|
|                                                                                                                                                                     |      |       |       |      |    |   |  | 3 | NTLSLM[147]HSC[339]GM[147]YDFSGQFAFHVGLPAK | 1 |
|                                                                                                                                                                     |      |       |       |      |    |   |  | 2 | LKEC[339]MDM[147]LR                        | 1 |
|                                                                                                                                                                     |      |       |       |      |    |   |  | 2 | C[339]VQSNIVLLTQAFR                        | 2 |
| GLSK_HUMAN (O94925) Glutaminase kidney isoform, mitochondrial precursor (EC 3.5.1.2) (GLS) (L-glutamine amidohydrolase) (K-glutaminase) [MASS=73461]                | 1.00 | 12.56 | 1.28  | 0.11 | 10 | 5 |  | 3 | GIHFC[330]HDLVSLC[330]NFHNYDNLR            | 1 |
|                                                                                                                                                                     |      |       |       |      |    |   |  | 2 | C[330]VQSNIVLLTQAFR                        | 2 |
|                                                                                                                                                                     |      |       |       |      |    |   |  | 2 | VPFC[330]LQSC[330]VKPLK                    | 1 |
|                                                                                                                                                                     |      |       |       |      |    |   |  | 2 | VPFC[339]LQSC[339]VKPLK                    | 1 |
|                                                                                                                                                                     |      |       |       |      |    |   |  | 3 | GIHFC[339]HDLVSLC[339]NFHNYDNLR            | 1 |
| GLSL_HUMAN (Q9UI32) Glutaminase liver isoform, mitochondrial precursor (EC 3.5.1.2) (GLS) (L-glutamine amidohydrolase) (L-glutaminase) [MASS=66309]                 | 0.00 | 1.16  | *     | *    | *  | 1 |  | 1 | FLIEAC[339]K                               | 1 |
|                                                                                                                                                                     |      |       |       |      |    |   |  | 1 | FLIEAC[330]K                               | 1 |
| GLUD1_HUMAN (Q5TDP6) Glutamate--ammonia ligase domain-containing protein 1 (Lengsin) (Lens glutamine synthase-like) [MASS=57278]                                    | 0.83 | 3.54  | 11.61 | 0.00 | 1  | 1 |  | 2 | KNM[147]FC[339]STSGTEQLTITGK               | 1 |
| GLYM_HUMAN (P34897) Serine hydroxymethyltransferase, mitochondrial precursor (EC 2.1.2.1) (Serine methylase) (Glycine hydroxymethyltransferase) (SHMT) [MASS=55993] | 0.00 | 7.14  | *     | *    | *  | 2 |  | 2 | AERVLELVSITANKNTC[339]PGDR                 | 1 |
|                                                                                                                                                                     |      |       |       |      |    |   |  | 3 | RISATSIFFESM[147]PYK                       | 1 |
| GNAO1_HUMAN (P09471) Guanine nucleotide-binding protein G(o) subunit alpha 1 [MASS=39919]                                                                           | 0.99 | 14.73 | 0.86  | 0.00 | 1  | 2 |  | 2 | SPLTIC[330]FPEYTGPNYEDAAAYIQAQFESK         | 1 |
|                                                                                                                                                                     |      |       |       |      |    |   |  | 2 | EDGISAAKDVKLLLLGAGESGK                     | 1 |
| GNAO2_HUMAN (P29777) Guanine nucleotide-binding protein G(o) subunit alpha 2 [MASS=39955]                                                                           | *    | 1.70  | *     | *    | *  | 1 |  | 1 | NKSAHK                                     | 1 |
| GNAZ_HUMAN (P19086) Guanine nucleotide-binding protein G(z) subunit alpha (G(x) alpha chain) (Gz-alpha) [MASS=40792]                                                | 0.78 | 6.50  | 1.46  | 0.00 | 1  | 2 |  | 2 | IPLTIC[339]FPEYK                           | 1 |
|                                                                                                                                                                     |      |       |       |      |    |   |  | 2 | SRDMTTGIVENK                               | 1 |
| GP179_HUMAN (Q6PRD1) Probable G-protein coupled receptor 179 precursor (Probable G-protein coupled receptor 158-like 1) [MASS=257362]                               | *    | 3.84  | *     | *    | *  | 6 |  | 2 | GRLTSLGEDVSKGMAK                           | 1 |
|                                                                                                                                                                     |      |       |       |      |    |   |  | 2 | VSPKEAGSM[147]GSR                          | 1 |
|                                                                                                                                                                     |      |       |       |      |    |   |  | 2 | ESQGGGEM[147]FLQK                          | 1 |
|                                                                                                                                                                     |      |       |       |      |    |   |  | 1 | SPNDTGK                                    | 1 |
|                                                                                                                                                                     |      |       |       |      |    |   |  | 2 | SEPIDVVP[147]MRKK                          | 1 |
|                                                                                                                                                                     |      |       |       |      |    |   |  | 3 | ESPAQAPKISDLPSSM[147]SSEVAEGHSLEATEK       | 1 |

|                                                                                                                                                                                                     |      |      |      |      |   |   |   |                                  |                                  |   |
|-----------------------------------------------------------------------------------------------------------------------------------------------------------------------------------------------------|------|------|------|------|---|---|---|----------------------------------|----------------------------------|---|
| GPDM_HUMAN (P43304) Glycerol-3-phosphate dehydrogenase, mitochondrial precursor (EC 1.1.99.5) (GPD-M) (GPDH-M) (mtGPD) [MASS=80833]                                                                 | 1.00 | 3.30 | 2.07 | 0.11 | 2 | 2 | 2 | C[330]VINATGPFTDSVR              | 1                                |   |
|                                                                                                                                                                                                     |      |      |      |      |   |   |   | 2                                | NYLSC[339]DVEVR                  | 1 |
| GPM6A_HUMAN (P51674) Neuronal membrane glycoprotein M6-a (M6a) [MASS=31209]                                                                                                                         | 1.00 | 3.60 | 0.88 | 0.06 | 3 | 1 | 2 | IC[330]TVSENFLR                  | 2                                |   |
|                                                                                                                                                                                                     |      |      |      |      |   |   |   | 2                                | IC[339]TVSENFLR                  | 1 |
| GPM6B_HUMAN (Q13491) Neuronal membrane glycoprotein M6-b (M6b) [MASS=28989]                                                                                                                         | 1.00 | 3.40 | 0.64 | 0.00 | 2 | 1 | 2 | SREDC[330]C[330]TKF              | 1                                |   |
|                                                                                                                                                                                                     |      |      |      |      |   |   |   | 2                                | SREDC[339]C[339]TKF              | 1 |
| GPR37_HUMAN (O15354) Probable G-protein coupled receptor 37 precursor (Endothelin B receptor-like protein 1) (ETBR-LP-1) (Parkin-associated endothelin receptor-like receptor) (PAELR) [MASS=67113] | 0.00 | 1.96 | 0.42 | 0.00 | 1 | 1 | 3 | EMSTFASVGTGC[330]                | 1                                |   |
| GPVI_HUMAN (Q9HCN6) Platelet glycoprotein VI precursor [MASS=36923]                                                                                                                                 | *    | 4.13 | *    | *    | * | 1 | 3 | C[339]QGPPGVDLYRLEK              | 2                                |   |
| GREM2_HUMAN (Q9H772) Gremlin-2 precursor (Cysteine knot superfamily 1, BMP antagonist 2) (Protein related to DAN and cerberus) [MASS=19320]                                                         | 0.00 | 6.55 | 0.25 | 0.00 | 1 | 1 | 3 | C[330]M[147]SVNLSDSDK            | 1                                |   |
| GRHPR_HUMAN (Q9UBQ7) Glyoxylate reductase/hydroxypyruvate reductase (EC 1.1.1.79) [MASS=35668]                                                                                                      | 0.00 | 7.62 | 0.75 | 0.00 | 1 | 1 | 3 | VGYTPDVLDTTAEALAVSLLLTTC[339]R   | 1                                |   |
| GRIN1_HUMAN (Q7Z2K8) G protein-regulated inducer of neurite outgrowth 1 (GRIN1) [MASS=102371]                                                                                                       | 0.00 | 2.18 | 0.46 | 0.00 | 1 | 2 | 2 | RPPGLFR                          | 1                                |   |
|                                                                                                                                                                                                     |      |      |      |      |   |   |   | 3                                | ETPQASEKVDPGSC[330]R             | 1 |
| GSLG1_HUMAN (Q92896) Golgi apparatus protein 1 precursor (Golgi sialoglycoprotein MG-160) (E-selectin ligand 1) (ESL-1) (Cysteine-rich fibroblast growth factor receptor) (CFR-1) [MASS=134592]     | *    | 5.68 | *    | *    | * | 3 | 3 | DM[147]NEKC[339]AIGVTHFQLVQMKDFR | 1                                |   |
|                                                                                                                                                                                                     |      |      |      |      |   |   |   | 3                                | C[339]GSIRLGEKDAHSQGEVSC[339]LEK | 1 |
|                                                                                                                                                                                                     |      |      |      |      |   |   |   | 3                                | HQKDMNEKC[330]AIGVTHFQLVQM[147]K | 1 |
| GTR3_HUMAN (P11169) Solute carrier family 2, facilitated glucose transporter member 3 (Glucose transporter type 3, brain) [MASS=53924]                                                              | 0.00 | 4.44 | 2.22 | 0.00 | 1 | 1 | 2 | RNSMLIVNLLAVTGGC[339]FMGLC[339]K | 1                                |   |
| GUC1B_HUMAN (Q9UMX6) Guanylyl cyclase-activating protein 2 (GCAP 2) (Guanylate cyclase activator 1B) [MASS=23346]                                                                                   | 0.00 | 8.54 | 1.69 | 0.00 | 1 | 1 | 3 | FVM[147]EC[339]PSGTLFM[147]HEFKR | 1                                |   |



|                                                                                                                                                                                                     |      |       |      |      |   |   |   |                                          |   |
|-----------------------------------------------------------------------------------------------------------------------------------------------------------------------------------------------------|------|-------|------|------|---|---|---|------------------------------------------|---|
| HBB_HUMAN (P68871) Hemoglobin subunit beta (Hemoglobin beta chain) (Beta-globin) [MASS=15867]                                                                                                       | 1.00 | 23.97 | 1.24 | 0.01 | 4 | 2 | 3 | GTFATLSELHC[339]DKLHVDPENFR              | 1 |
|                                                                                                                                                                                                     |      |       |      |      |   |   | 2 | GTFATLSELHC[330]DK                       | 1 |
|                                                                                                                                                                                                     |      |       |      |      |   |   | 3 | GTFATLSELHC[330]DKLHVDPENFR              | 1 |
| HDAC4_HUMAN (P56524) Histone deacetylase 4 (HD4) [MASS=119069]                                                                                                                                      | *    | 2.49  | *    | *    | * | 2 | 2 | PNANAVRSM[147]EKVMEIHSK                  | 1 |
|                                                                                                                                                                                                     |      |       |      |      |   |   | 2 | QQEMLAMK                                 | 1 |
| HG2A_HUMAN (P04233) HLA class II histocompatibility antigen gamma chain (HLA-DR antigens-associated invariant chain) (Ia antigen-associated invariant chain) (Ii) (p33) (CD74 antigen) [MASS=33515] | *    | 7.43  | *    | *    | * | 1 | 3 | DLISNNEQLPM[147]LGRRPGAPESK              | 1 |
| HGF_HUMAN (P14210) Hepatocyte growth factor precursor (Scatter factor) (SF) (Hepatopoeitin A) [Contains: Hepatocyte growth factor alpha chain; Hepatocyte growth factor beta chain] [MASS=83133]    | 0.00 | 7.28  | 0.45 | 0.00 | 1 | 2 | 3 | NKHIC[330]GGSLIKESWVLTAR                 | 1 |
|                                                                                                                                                                                                     |      |       |      |      |   |   | 3 | MWVTKLLPALLLQHVLHLLLLPIAIPYAEGQRK        | 1 |
| HNF4A_HUMAN (P41235) Hepatocyte nuclear factor 4-alpha (HNF-4-alpha) (Transcription factor HNF-4) (Transcription factor 14) [MASS=51740]                                                            | *    | 1.94  | *    | *    | * | 1 | 2 | FSRQC[330]VVDK                           | 1 |
| HNRL1_HUMAN (Q9BUJ2) Heterogeneous nuclear ribonucleoprotein U-like protein 1 (Adenovirus early region 1B-associated protein 5) (E1B-55 kDa-associated protein 5) (E1B-AP5) [MASS=95738]            | 0.00 | 0.93  | *    | *    | * | 1 | 2 | INEEISVK                                 | 1 |
| HS90B_HUMAN (P08238) Heat shock protein HSP 90-beta (HSP 84) (HSP 90) [MASS=83132]                                                                                                                  | 0.98 | 3.73  | 0.78 | 0.00 | 1 | 2 | 2 | VFIM[147]DSC[330]DELIPEYLNfir            | 1 |
|                                                                                                                                                                                                     |      |       |      |      |   |   | 2 | AKFENLC[330]K                            | 1 |
| HV1C_HUMAN (P01744) Ig heavy chain V-I region ND precursor (Fragments) [MASS=16503]                                                                                                                 | *    | 24.49 | *    | *    | * | 2 | 2 | VHSQTQLVQSGAEVRK                         | 1 |
|                                                                                                                                                                                                     |      |       |      |      |   |   | 3 | VTMTRDASFSTAYMDLRSLR                     | 1 |
| HXC11_HUMAN (O43248) Homeobox protein Hox-C11 [MASS=33748]                                                                                                                                          | 0.00 | 4.93  | 0.85 | 0.00 | 1 | 1 | 3 | MFNSVNLGNFC[339]SPSR                     | 1 |
| HXD4_HUMAN (P09016) Homeobox protein Hox-D4 (Hox-4B) (Hox-5.1) (HHO.C13) [MASS=27885]                                                                                                               | 0.00 | 13.73 | 0.98 | 0.00 | 1 | 1 | 3 | GHGQEPGGPGGHYAAPGEPc[339]PAPPAPPPAPLPGAR | 1 |

|                                                                                                                                                                        |      |       |      |      |    |    |  |   |                                   |   |
|------------------------------------------------------------------------------------------------------------------------------------------------------------------------|------|-------|------|------|----|----|--|---|-----------------------------------|---|
|                                                                                                                                                                        |      |       |      |      |    |    |  | 2 | TVC[339]GVVSR                     | 1 |
|                                                                                                                                                                        |      |       |      |      |    |    |  | 3 | LGVEPSDDDC[330]VSVQHVC[330]TIVSFR | 1 |
|                                                                                                                                                                        |      |       |      |      |    |    |  | 2 | C[339]NVSFLLSEDGSGK               | 1 |
|                                                                                                                                                                        |      |       |      |      |    |    |  | 2 | LPVGFTFSFPC[330]QQSK              | 1 |
|                                                                                                                                                                        |      |       |      |      |    |    |  | 3 | ATDC[339]VGHVVTLLR                | 1 |
|                                                                                                                                                                        |      |       |      |      |    |    |  | 3 | MIAAQLLAYFTELKDDQVK               | 1 |
|                                                                                                                                                                        |      |       |      |      |    |    |  | 3 | LGVEPSDDDC[339]VSVQHVC[339]TIVSFR | 1 |
|                                                                                                                                                                        |      |       |      |      |    |    |  | 2 | ATDC[339]VGHVVTLLR                | 2 |
|                                                                                                                                                                        |      |       |      |      |    |    |  | 2 | AILQQLGLNSTC[339]DDSILVK          | 1 |
|                                                                                                                                                                        |      |       |      |      |    |    |  | 2 | MVSGM[147]YLGELVR                 | 1 |
|                                                                                                                                                                        |      |       |      |      |    |    |  | 2 | AAQLC[339]GAGM[147]AAVVDK         | 1 |
|                                                                                                                                                                        |      |       |      |      |    |    |  | 2 | KLPVGFTFSFPC[339]QQSK             | 1 |
|                                                                                                                                                                        |      |       |      |      |    |    |  | 2 | KLPVGFTFSFPC[330]QQSK             | 1 |
|                                                                                                                                                                        |      |       |      |      |    |    |  | 2 | ATDC[330]VGHVVTLLR                | 1 |
|                                                                                                                                                                        |      |       |      |      |    |    |  | 2 | GAAMVTAVAYRLAEQHRQIEETLAHFHLTK    | 1 |
|                                                                                                                                                                        |      |       |      |      |    |    |  | 3 | NILIDFTKKGFLFR                    | 1 |
|                                                                                                                                                                        |      |       |      |      |    |    |  | 2 | LPVGFTFSFPC[339]QQSK              | 5 |
|                                                                                                                                                                        |      |       |      |      |    |    |  | 2 | TVC[330]GVVSR                     | 1 |
|                                                                                                                                                                        |      |       |      |      |    |    |  | 2 | PRQEIIDLSYMVR                     | 1 |
| HXK1_HUMAN (P19367) Hexokinase-1 (EC 2.7.1.1) (Hexokinase type I) (HK I) (Brain form hexokinase) [MASS=102484]                                                         | 1.00 | 21.81 | 1.21 | 0.07 | 18 | 12 |  |   |                                   |   |
| I2C1_HUMAN (Q9UL18) Eukaryotic translation initiation factor 2C 1 (eIF2C 1) (eIF-2C 1) (Argonaute-1) (Putative RNA-binding protein Q99) [MASS=97214]                   | *    | 1.63  | *    | *    | *  | 1  |  |   |                                   |   |
| IDH3A_HUMAN (P50213) Isocitrate dehydrogenase [NAD] subunit alpha, mitochondrial precursor (EC 1.1.1.41) (Isocitric dehydrogenase) (NAD(+)-specific ICDH) [MASS=39591] | 1.00 | 7.65  | 1.36 | 0.03 | 3  | 2  |  | 2 | TFDLYANVRPC[330]VSIEGYK           | 1 |
|                                                                                                                                                                        |      |       |      |      |    |    |  | 2 | IEAAC[339]FATIK                   | 2 |
| IDH3G_HUMAN (P51553) Isocitrate dehydrogenase [NAD] subunit gamma, mitochondrial precursor (EC 1.1.1.41) (Isocitric dehydrogenase) (NAD(+)-specific ICDH) [MASS=42794] | 1.00 | 11.20 | 0.98 | 0.16 | 5  | 3  |  | 2 | TSLDLYANVIHC[339]K                | 2 |
|                                                                                                                                                                        |      |       |      |      |    |    |  | 2 | LGDGLFLQC[339]C[339]R             | 1 |
|                                                                                                                                                                        |      |       |      |      |    |    |  | 3 | SRNNILRTSLDLYANVIHC[330]K         | 1 |
|                                                                                                                                                                        |      |       |      |      |    |    |  | 2 | TSLDLYANVIHC[330]K                | 1 |

|                                                                                                                                                                                                                                           |      |       |      |      |   |   |   |                                             |   |
|-------------------------------------------------------------------------------------------------------------------------------------------------------------------------------------------------------------------------------------------|------|-------|------|------|---|---|---|---------------------------------------------|---|
| IDHP_HUMAN (P48735) Isocitrate dehydrogenase [NADP], mitochondrial precursor (EC 1.1.1.42) (Oxalosuccinate decarboxylase) (IDH) (NADP(+)-specific ICDH) (IDP) (ICD-M) [MASS=50909]                                                        | 1.00 | 8.41  | 1.02 | 0.09 | 5 | 3 | 2 | NILGGTVFREPIIC[339]K                        | 2 |
|                                                                                                                                                                                                                                           |      |       |      |      |   |   | 2 | C[330]ATITPDEAR                             | 1 |
|                                                                                                                                                                                                                                           |      |       |      |      |   |   | 2 | NILGGTVFREPIIC[330]K                        | 1 |
|                                                                                                                                                                                                                                           |      |       |      |      |   |   | 2 | DLAGC[330]IHGLSNVK                          | 2 |
| IF3X_HUMAN (O75153) Putative eukaryotic translation initiation factor 3 subunit (eIF-3) [MASS=146669]                                                                                                                                     | 0.00 | 2.29  | 0.67 | 0.00 | 1 | 2 | 3 | SREVIRNAC[339]K                             | 1 |
|                                                                                                                                                                                                                                           |      |       |      |      |   |   | 3 | DC[330]MEHAVLPVDGATLAEVM[147]R              | 1 |
| IGS4B_HUMAN (Q8N126) Immunoglobulin superfamily member 4B precursor (Nectin-like protein 1) (TSLC1-like protein 1) (Synaptic cell adhesion molecule 3) (Brain immunoglobulin receptor) [MASS=43300]                                       | *    | 4.27  | *    | *    | * | 1 | 2 | DTATLNC[339]QSSGSKPAAR                      | 1 |
| IGSF8_HUMAN (Q969P0) Immunoglobulin superfamily member 8 precursor (CD81 partner 3) (Glu-Trp-Ile EWI motif-containing protein 2) (EWI-2) (Keratinocytes-associated transmembrane protein 4) (KCT-4) (LIR-D1) (CD316 antigen) [MASS=65034] | 0.00 | 4.57  | 1.66 | 0.00 | 1 | 1 | 3 | M[147]GALRPTLLPPSLPLLLLLMLGM[147]GC[339]WAR | 1 |
| IL17_HUMAN (Q16552) Interleukin-17A precursor (IL-17A) (IL-17) (Cytotoxic T-lymphocyte-associated antigen 8) (CTLA-8) [MASS=17504]                                                                                                        | 0.00 | 7.10  | 0.38 | 0.00 | 1 | 1 | 3 | REPPHC[330]PNSFR                            | 1 |
| IL19_HUMAN (Q9UHD0) Interleukin-19 precursor (IL-19) (Melanoma differentiation-associated protein-like protein) (NG.1) [MASS=20392]                                                                                                       | 0.23 | 10.73 | 1.66 | 0.00 | 1 | 1 | 2 | RC[339]LISTDMHHIEESFQEIK                    | 1 |
| IL6RB_HUMAN (P40189) Interleukin-6 receptor beta chain precursor (IL-6R-beta) (Interleukin 6 signal transducer) (Membrane glycoprotein 130) (gp130) (Oncostatin M receptor) (CD130 antigen) (CDw130) [MASS=103522]                        | *    | 3.49  | *    | *    | * | 1 | 3 | TYLRGNLAESKC[330]YLITVTPVYADGPGSPESIK       | 1 |
| IMMT_HUMAN (Q16891) Mitochondrial inner membrane protein (Mitofilin) (p87/89) (Proliferation-inducing gene 4 protein) [MASS=83677]                                                                                                        | 0.99 | 2.51  | 1.48 | 0.00 | 1 | 1 | 2 | LLSYASYC[330]IEHGDLELAAK                    | 1 |

|                                                                                                                                                                                                  |      |      |      |      |   |   |             |                                                                                |             |
|--------------------------------------------------------------------------------------------------------------------------------------------------------------------------------------------------|------|------|------|------|---|---|-------------|--------------------------------------------------------------------------------|-------------|
| INP4B_HUMAN (O15327) Type II inositol-3,4-bisphosphate 4-phosphatase (EC 3.1.3.66) (Inositol polyphosphate 4-phosphatase type II) [MASS=104705]                                                  | 0.00 | 1.52 | 5.72 | 0.00 | 1 | 1 | 2           | TSM[147]SVTLEQC[339]SILR                                                       | 1           |
| IPO11_HUMAN (Q9UI26) Importin-11 (Imp11) (Ran-binding protein 11) (RanBP11) [MASS=112535]                                                                                                        | 0.38 | 2.46 | 0.63 | 0.00 | 1 | 2 | 3<br>2      | NM[147]EVMGFLHGIFER<br>FIVQC[330]M[147]NLIK                                    | 1<br>1      |
| IRAK3_HUMAN (Q9Y616) Interleukin-1 receptor-associated kinase 3 (EC 2.7.11.1) (IRAK-3) (IL-1 receptor-associated kinase M) (IRAK-M) [MASS=67752]                                                 | 0.00 | 2.52 | 1.48 | 0.00 | 1 | 1 | 2           | VNIDPSSEAPGHSC[339]R                                                           | 1           |
| ITA10_HUMAN (O75578) Integrin alpha-10 precursor [MASS=127573]                                                                                                                                   | 0.00 | 2.23 | 1.22 | 0.00 | 1 | 2 | 2<br>2      | LNGSNTQC[330]QVVR<br>VTRYGIAVLGHYLR                                            | 1<br>1      |
| ITAV_HUMAN (P06756) Integrin alpha-V precursor (Vitronectin receptor subunit alpha) (CD51 antigen) [Contains: Integrin alpha-V heavy chain; Integrin alpha-V light chain] [MASS=116051]          | 0.00 | 2.00 | 0.58 | 0.00 | 1 | 1 | 2           | QVVC[330]DLGNPM[147]KAGTQLLAGLR                                                | 1           |
| ITPR1_HUMAN (Q14643) Inositol 1,4,5-trisphosphate receptor type 1 (Type 1 inositol 1,4,5-trisphosphate receptor) (Type 1 InsP3 receptor) (IP3 receptor isoform 1) (InsP3R1) (IP3R) [MASS=313943] | *    | 2.07 | *    | *    | * | 3 | 1<br>3<br>3 | IGLLGHPPHM[147]NVNPQQPA<br>HNKELQSMK<br>PGGGGGSGSSSM[147]SRGEMSLAEVQC[330]HLDK | 1<br>1<br>1 |
| IVD_HUMAN (P26440) Isovaleryl-CoA dehydrogenase, mitochondrial precursor (EC 1.3.99.10) (IVD) [MASS=46319]                                                                                       | 0.67 | 2.36 | 2.70 | 0.00 | 1 | 1 | 2           | AC[339]DEGHC[339]TAK                                                           | 1           |
| JAD1A_HUMAN (P29375) Jumonji/ARID domain-containing protein 1A (Retinoblastoma-binding protein 2) (RBBP-2) [MASS=195815]                                                                         | *    | 0.75 | *    | *    | * | 1 | 2           | SSSQKKGSSWQAK                                                                  | 1           |
| JAK3_HUMAN (P52333) Tyrosine-protein kinase JAK3 (EC 2.7.10.2) (Janus kinase 3) (JAK-3) (Leukocyte janus kinase) (L-JAK) [MASS=125098]                                                           | 0.00 | 2.31 | 4.27 | 0.00 | 1 | 1 | 3           | QQLPAPKWTELLLIQQC[339]M[147]AYEPVQR                                            | 1           |

|                                                                                                                                                                                                                                                                              |      |       |       |      |   |   |                                                                                                             |                           |   |
|------------------------------------------------------------------------------------------------------------------------------------------------------------------------------------------------------------------------------------------------------------------------------|------|-------|-------|------|---|---|-------------------------------------------------------------------------------------------------------------|---------------------------|---|
| JHD1B_HUMAN (Q8NHM5) JmjC domain-containing histone demethylation protein 1B (EC 1.14.11.-) (F-box/LRR-repeat protein 10) (F-box and leucine-rich repeat protein 10) (F-box protein FBL10) (Protein JEMMA) (Jumonji domain-containing EMSY-interactor methyltr [MASS=152614] | *    | 1.95  | *     | *    | * | 1 | 3                                                                                                           | APKPPTDGSTSPSTPSEDQEALGKK | 1 |
| JHD2C_HUMAN (Q15652) Probable JmjC domain-containing histone demethylation protein 2C (EC 1.14.11.-) (Jumonji domain-containing protein 1C) (Thyroid receptor-interacting protein 8) (TRIP-8) [MASS=284523]                                                                  | 0.00 | 1.18  | 0.50  | 0.00 | 1 | 3 | 1 QPKPTYK<br>2 LSFSKNGVVR<br>2 C[339]VIDITNDTNLEK                                                           | 1<br>1<br>1               |   |
| JPH3_HUMAN (Q8WXH2) Junctophilin-3 (Junctophilin type 3) (JP-3) [MASS=81468]                                                                                                                                                                                                 | *    | 0.80  | *     | *    | * | 1 | 1 M[147]SSGGR                                                                                               | 1                         |   |
| K0182_HUMAN (Q14687) Protein KIAA0182 (Fragment) [MASS=130322]                                                                                                                                                                                                               | *    | 1.82  | *     | *    | * | 1 | 2 VQELAPASGEKARLSEAPGGK<br>2 NLGMVC[339]R                                                                   | 1<br>5                    |   |
| K0196_HUMAN (Q12768) Protein KIAA0196 [MASS=134286]                                                                                                                                                                                                                          | 0.00 | 2.07  | 32.74 | 0.03 | 4 | 2 | 2 YSAARSSADSNM[147]DDIC[339]K                                                                               | 1                         |   |
| K0310_HUMAN (O15027) Protein KIAA0310 [MASS=233516]                                                                                                                                                                                                                          | 0.00 | 3.99  | *     | *    | * | 4 | 2 KAPPPPPTSMPKTVQAAPPALPGPPGAPVNMYSR<br>2 ANVVGEVR<br>3 TLENPVNVYNPSHSDSLASQQSVASHPR<br>2 TTKLVLIGSNHSLPFLK | 1<br>1<br>1<br>1          |   |
| K0406_HUMAN (Q43156) Protein KIAA0406 [MASS=122069]                                                                                                                                                                                                                          | 0.00 | 2.85  | 2.56  | 0.00 | 1 | 2 | 2 LQLAVLQGLGPLC[339]ER<br>3 C[330]LQVLLLQC[330]DC[339]QDHPR                                                 | 1<br>1                    |   |
| K0971_HUMAN (Q9NYY8) Protein KIAA0971 [MASS=81462]                                                                                                                                                                                                                           | 0.00 | 3.94  | 0.37  | 0.00 | 1 | 2 | 3 C[330]IGKDAPIALKR<br>2 IMQYKYLLFSLHAIVK                                                                   | 1<br>1                    |   |
| K1576_HUMAN (Q9HCJ6) Probable oxidoreductase KIAA1576 (EC 1.-.-.-) [MASS=45899]                                                                                                                                                                                              | 0.00 | 3.34  | 1.57  | 0.00 | 1 | 1 | 3 VKAC[339]GLNFIDLM[147]VR                                                                                  | 1                         |   |
| K1688_HUMAN (Q9C0H5) Protein KIAA1688 [MASS=121285]                                                                                                                                                                                                                          | 0.00 | 5.72  | 1.75  | 0.00 | 1 | 4 | 2 GSSVSREGSTSSSLEPEPDTEK<br>3 LQTLKQNTESPR<br>2 MDVSNLAMVMAPNC[339]LR<br>2 KPMIVTSDRHVK                     | 1<br>1<br>1<br>1          |   |
| KAC_HUMAN (P01834) Ig kappa chain C region [MASS=11609]                                                                                                                                                                                                                      | 0.99 | 15.09 | 1.22  | 0.00 | 1 | 1 | 2 SGTASVVC[330]LLNNFYPR                                                                                     | 1                         |   |

|                                                                                                                                                                                                                                                                               |      |      |      |      |   |   |                                                                                                                                                                                          |                            |   |
|-------------------------------------------------------------------------------------------------------------------------------------------------------------------------------------------------------------------------------------------------------------------------------|------|------|------|------|---|---|------------------------------------------------------------------------------------------------------------------------------------------------------------------------------------------|----------------------------|---|
| KAP3_HUMAN (P31323) cAMP-dependent protein kinase type II-beta regulatory subunit [MASS=46215]                                                                                                                                                                                | *    | 2.40 | *    | *    | * | 1 | 2                                                                                                                                                                                        | LLGPC[330]M[147]EIM[147]K  | 1 |
| KBTB3_HUMAN (Q8NAB2) Kelch repeat and BTB domain-containing protein 3 (BTB and kelch domain-containing protein 3) [MASS=69395]                                                                                                                                                | *    | 2.63 | *    | *    | * | 1 | 2                                                                                                                                                                                        | DDGSVTITNLSSKAVK           | 1 |
| KCC2A_HUMAN (Q9UQM7) Calcium/calmodulin-dependent protein kinase type II alpha chain (EC 2.7.11.17) (CaM-kinase II alpha chain) (CaM kinase II alpha subunit) (CaMK-II subunit alpha) [MASS=54029]                                                                            | 1.00 | 7.11 | 1.00 | 0.05 | 6 | 2 | 3 MC[339]DPGM[147]TAFEPEALGNLVEGLDFHR<br>3 MC[330]DPGM[147]TAFEPEALGNLVEGLDFHR<br>2 STVASC[339]M[147]HR<br>2 STVASC[330]MHR<br>2 STVASC[339]MHR<br>2 MC[330]DPGM[147]TAFEPEALGNLVEGLDFHR | 1<br>1<br>1<br>1<br>1<br>1 |   |
| KCC2B_HUMAN (Q13554) Calcium/calmodulin-dependent protein kinase type II beta chain (EC 2.7.11.17) (CaM-kinase II beta chain) (CaM kinase II subunit beta) (CaMK-II subunit beta) [MASS=72726]                                                                                | 1.00 | 5.27 | 0.86 | 0.11 | 5 | 2 | 3 IC[339]DPGLTSFEPEALGNLVEGM[147]DFHR<br>3 IC[330]DPGLTSFEPEALGNLVEGMDFHR<br>2 LC[330]TGHEYAAK<br>3 IC[330]DPGLTSFEPEALGNLVEGM[147]DFHR                                                  | 2<br>1<br>1<br>1           |   |
| KCC2D_HUMAN (Q13557) Calcium/calmodulin-dependent protein kinase type II delta chain (EC 2.7.11.17) (CaM-kinase II delta chain) (CaM kinase II subunit delta) (CaMK-II subunit delta) [MASS=56297]                                                                            | 0.97 | 5.01 | 1.01 | 0.00 | 1 | 1 | 3 IC[339]DPGLTAFEPEALGNLVEGMDFHR                                                                                                                                                         | 1                          |   |
| KCMA1_HUMAN (Q12791) Calcium-activated potassium channel subunit alpha 1 (Calcium-activated potassium channel, subfamily M subunit alpha 1) (Maxi K channel) (MaxiK) (BK channel) (K(VCA)alpha) (BKCA alpha) (KCa1.1) (Slowpoke homolog) (Slo homolog) (Slo-al) [MASS=137559] | 0.00 | 0.89 | 2.69 | 0.00 | 1 | 1 | 2 TYNMLC[339]FGIYR                                                                                                                                                                       | 1                          |   |
| KCNG2_HUMAN (Q9UJ96) Potassium voltage-gated channel subfamily G member 2 (Voltage-gated potassium channel subunit Kv6.2) (Cardiac potassium channel subunit) [MASS=51239]                                                                                                    | 0.00 | 5.58 | 1.13 | 0.00 | 1 | 1 | 3 LFAC[339]VSVSFVAVTAVGLC[339]LSTM[147]PDIR                                                                                                                                              | 1                          |   |

|                                                                                                                                                                                                                                                     |      |       |      |      |   |   |   |                      |   |
|-----------------------------------------------------------------------------------------------------------------------------------------------------------------------------------------------------------------------------------------------------|------|-------|------|------|---|---|---|----------------------|---|
| KCNH1_HUMAN (O95259) Potassium voltage-gated channel subfamily H member 1 (Voltage-gated potassium channel subunit Kv10.1) (Ether-a-go-go potassium channel 1) (hEAG1) (h-eag) [MASS=111422]                                                        | 0.00 | 1.11  | 0.39 | 0.00 | 1 | 1 | 2 | ALTYC[330]DLHVIK     | 1 |
| KCNH3_HUMAN (Q9ULD8) Potassium voltage-gated channel subfamily H member 3 (Voltage-gated potassium channel subunit Kv12.2) (Ether-a-go-go-like potassium channel 2) (ELK channel 2) (ELK2) (Brain-specific eag-like channel 1) (BEC1) [MASS=117128] | *    | 1.75  | *    | *    | * | 2 | 2 | WKETGGGR             | 1 |
|                                                                                                                                                                                                                                                     |      |       |      |      |   |   | 2 | QQIRKALDEHK          | 1 |
| KCNQ5_HUMAN (Q9NR82) Potassium voltage-gated channel subfamily KQT member 5 (Voltage-gated potassium channel subunit Kv7.5) (Potassium channel subunit alpha KvLQT5) (KQT-like 5) [MASS=99024]                                                      | *    | 1.90  | *    | *    | * | 1 | 2 | ENVQVAQSNLTKDRSMR    | 1 |
| KCNS1_HUMAN (Q96KK3) Potassium voltage-gated channel subfamily S member 1 (Voltage-gated potassium channel subunit Kv9.1) (Delayed-rectifier K(+)) channel alpha subunit 1) [MASS=58371]                                                            | 0.00 | 2.09  | 0.27 | 0.00 | 1 | 1 | 2 | RLC[330]DDYDEAAR     | 1 |
|                                                                                                                                                                                                                                                     |      |       |      |      |   |   | 2 | FC[339]TGLTQIETLFK   | 4 |
| KCRB_HUMAN (P12277) Creatine kinase B-type (EC 2.7.3.2) (Creatine kinase B chain) (B-CK) [MASS=42644]                                                                                                                                               | 1.00 | 10.24 | 1.16 | 0.01 | 9 | 3 | 2 | FC[330]TGLTQIETLFK   | 2 |
|                                                                                                                                                                                                                                                     |      |       |      |      |   |   | 1 | FC[339]TGLTQIETLFK   | 1 |
|                                                                                                                                                                                                                                                     |      |       |      |      |   |   | 2 | GFC[330]LPPHC[330]SR | 1 |
|                                                                                                                                                                                                                                                     |      |       |      |      |   |   | 3 | LAVEALSSLDGDLAGR     | 2 |
|                                                                                                                                                                                                                                                     |      |       |      |      |   |   | 2 | GFC[339]LPPHC[339]SR | 1 |

|                                                                                                                                                                                                                                                                 |      |       |      |      |   |   |   |                                             |   |
|-----------------------------------------------------------------------------------------------------------------------------------------------------------------------------------------------------------------------------------------------------------------|------|-------|------|------|---|---|---|---------------------------------------------|---|
| KCRS_HUMAN (P17540) Creatine kinase, sarcomeric mitochondrial precursor (EC 2.7.3.2) (S-MtCK) (Mib-CK) (Basic-type mitochondrial creatine kinase) [MASS=47520]                                                                                                  | 0.00 | 15.04 | 2.86 | 0.00 | 1 | 4 | 3 | LGYILTC[339]PSNLGTGLRAGVHVRIPK              | 1 |
|                                                                                                                                                                                                                                                                 |      |       |      |      |   |   | 2 | LGYILTC[330]PSNLGTGLR                       | 2 |
|                                                                                                                                                                                                                                                                 |      |       |      |      |   |   | 2 | LGYILTC[339]PSNLGTGLR                       | 6 |
| KCRU_HUMAN (P12532) Creatine kinase, ubiquitous mitochondrial precursor (EC 2.7.3.2) (U-MtCK) (Mia-CK) (Acidic-type mitochondrial creatine kinase) [MASS=47036]                                                                                                 | 1.00 | 8.87  | 1.18 | 0.08 | 8 | 2 | 3 | M[147]ASIFSKLLTGR                           | 1 |
|                                                                                                                                                                                                                                                                 |      |       |      |      |   |   | 2 | GLSLPPAC[339]TR                             | 1 |
|                                                                                                                                                                                                                                                                 |      |       |      |      |   |   | 1 | GLSLPPAC[339]TR                             | 1 |
|                                                                                                                                                                                                                                                                 |      |       |      |      |   |   | 2 | HNNC[330]M[147]ASHLTPAVYAR                  | 2 |
|                                                                                                                                                                                                                                                                 |      |       |      |      |   |   | 3 | HNNC[339]M[147]ASHLTPAVYAR                  | 1 |
| KI21A_HUMAN (Q7Z4S6) Kinesin family member 21A (Kinesin-like protein KIF2) (NY-REN-62 antigen) [MASS=187178]                                                                                                                                                    | 0.97 | 1.91  | 1.27 | 0.00 | 1 | 2 | 2 | GLSLPPAC[339]TR                             | 1 |
|                                                                                                                                                                                                                                                                 |      |       |      |      |   |   | 2 | GLSLPPAC[339]TR                             | 1 |
| KIF17_HUMAN (Q9P2E2) Kinesin-like protein KIF17 (KIF3-related motor protein) [MASS=115113]                                                                                                                                                                      | 0.00 | 3.21  | 0.80 | 0.00 | 1 | 1 | 3 | LLQDSLGGNTKTLM[147]VAC[330]LSPADNNYDETLSTLR | 1 |
| KIRR2_HUMAN (Q6UWL6) Kin of IRRE-like protein 2 precursor (Kin of irregular chiasm-like protein 2) (Nephrin-like protein 3) [MASS=75093]                                                                                                                        | 0.00 | 3.53  | 2.78 | 0.00 | 1 | 1 | 3 | IVAGVAAATTTLLMVITGVALC[339]C[339]WR         | 2 |
| KLD8A_HUMAN (Q8IYD2) Kelch domain-containing protein 8A [MASS=38899]                                                                                                                                                                                            | 0.00 | 7.14  | 0.44 | 0.00 | 1 | 1 | 2 | NC[330]LLAVGGVNQGLSDAVEALC[330]VSDS         | 1 |
| KLHL7_HUMAN (Q8IXQ5) Kelch-like protein 7 [MASS=66005]                                                                                                                                                                                                          | *    | 2.05  | *    | *    | * | 1 | 1 | MAASGVEKSSKK                                | 1 |
| KNG1_HUMAN (P01042) Kininogen-1 precursor (Alpha-2-thiol proteinase inhibitor) [Contains: Kininogen-1 heavy chain; Bradykinin (Kallidin I); Lysyl-bradykinin (Kallidin II); Kininogen-1 light chain; Low molecular weight growth-promoting factor] [MASS=71945] | 0.00 | 5.90  | 2.20 | 0.00 | 1 | 2 | 2 | HGHGHGKHKNK                                 | 1 |
|                                                                                                                                                                                                                                                                 |      |       |      |      |   |   | 3 | YFIDFVARETTC[339]SKESNEELTESC[339]ETK       | 1 |



|                                                                                                                                                                            |      |      |       |      |   |   |   |                                    |   |
|----------------------------------------------------------------------------------------------------------------------------------------------------------------------------|------|------|-------|------|---|---|---|------------------------------------|---|
| KNTC1_HUMAN (P50748) Kinetochore-associated protein 1 (Rough deal homolog (hRod) (HsROD) (Rod) [MASS=250747]                                                               | 0.00 | 1.81 | 1.09  | 0.00 | 1 | 3 | 2 | QALALQMSK                          | 1 |
|                                                                                                                                                                            |      |      |       |      |   |   | 2 | AEALLKKLHIQYR                      | 1 |
|                                                                                                                                                                            |      |      |       |      |   |   | 2 | IIDLIDREQGEDC[330]LLLLK            | 1 |
| KPYM_HUMAN (P14618) Pyruvate kinase isozymes M1/M2 (EC 2.7.1.40) (Pyruvate kinase muscle isozyme) (Cytosolic thyroid hormone-binding protein) (CTHBP) (THBP1) [MASS=57805] | 1.00 | 2.45 | 0.88  | 0.02 | 2 | 1 | 2 | NTGIIC[339]TIGPASR                 | 1 |
|                                                                                                                                                                            |      |      |       |      |   |   | 2 | NTGIIC[330]TIGPASR                 | 1 |
| L1CAM_HUMAN (P32004) Neural cell adhesion molecule L1 precursor (N-CAM L1) (CD171 antigen) [MASS=140002]                                                                   | 0.00 | 1.43 | 0.56  | 0.00 | 1 | 2 | 2 | C[330]EASGKPEVQFR                  | 1 |
|                                                                                                                                                                            |      |      |       |      |   |   | 1 | DGVHFK                             | 1 |
| L2GL2_HUMAN (Q6P1M3) Lethal(2) giant larvae protein homolog 2 (HGL) [MASS=113447]                                                                                          | *    | 1.18 | *     | *    | * | 1 | 3 | NHRPGNGAGPKK                       | 1 |
| LAMA1_HUMAN (P25391) Laminin alpha-1 chain precursor (Laminin A chain) [MASS=337156]                                                                                       | *    | 2.05 | *     | *    | * | 4 | 2 | QIDRDQLM[147]TVLANVTHLLIR          | 1 |
|                                                                                                                                                                            |      |      |       |      |   |   | 2 | VMTDLGSGPITLLTDRR                  | 1 |
|                                                                                                                                                                            |      |      |       |      |   |   | 3 | QGVLAVIDAYNTSNK                    | 1 |
|                                                                                                                                                                            |      |      |       |      |   |   | 2 | IPSQQDALGGR                        | 1 |
| LAMA3_HUMAN (Q16787) Laminin alpha-3 chain precursor (Epiligrin 170 kDa subunit) (E170) (Nicein subunit alpha) [MASS=189304]                                               | *    | 1.46 | *     | *    | * | 2 | 3 | WHTVVFHGDGEKGR                     | 1 |
|                                                                                                                                                                            |      |      |       |      |   |   | 3 | EAVMDRVKFQR                        | 1 |
| LAMA5_HUMAN (O15230) Laminin alpha-5 chain precursor [MASS=399709]                                                                                                         | 0.00 | 1.24 | 1.42  | 0.00 | 1 | 4 | 2 | SPNHPLDSPHVC[339]R                 | 1 |
|                                                                                                                                                                            |      |      |       |      |   |   | 2 | C[339]DPDTGQC[339]RC[339]R         | 1 |
|                                                                                                                                                                            |      |      |       |      |   |   | 1 | LLGPQR                             | 1 |
|                                                                                                                                                                            |      |      |       |      |   |   | 2 | LGLVWAALQGARTQLR                   | 1 |
| LAMC3_HUMAN (Q9Y6N6) Laminin gamma-3 chain precursor (Laminin 12 gamma 3 subunit) [MASS=172051]                                                                            | *    | 0.82 | *     | *    | * | 1 | 2 | LGKAYEITYVRLK                      | 1 |
| LCMT2_HUMAN (O60294) Leucine carboxyl methyltransferase 2 (EC 2.1.1.-) (p21WAF1/CIP1 promoter-interacting protein) [MASS=75601]                                            | 0.00 | 3.06 | 11.03 | 0.00 | 1 | 1 | 3 | AVRHC[339]VRAFLEQIGAPQAALR         | 1 |
| LDLR_HUMAN (P01130) Low-density lipoprotein receptor precursor (LDL receptor) [MASS=95376]                                                                                 | 0.20 | 2.21 | 0.89  | 0.00 | 1 | 1 | 3 | C[330]DGQVDC[330]DNGSDEQGC[330]PPK | 1 |
| LETM1_HUMAN (O95202) Leucine zipper-EF-hand-containing transmembrane protein 1, mitochondrial precursor [MASS=83354]                                                       | 0.99 | 6.36 | 1.16  | 0.00 | 1 | 2 | 2 | LFEDELTLDNLTRPQLVALC[339]K         | 1 |
|                                                                                                                                                                            |      |      |       |      |   |   | 3 | EDVHISTSQVAEIVATLEKEEKVEEK         | 1 |

|                                                                                                                                                                                       |      |       |      |      |   |   |   |                                                                                                                                                     |                  |
|---------------------------------------------------------------------------------------------------------------------------------------------------------------------------------------|------|-------|------|------|---|---|---|-----------------------------------------------------------------------------------------------------------------------------------------------------|------------------|
| LIPA2_HUMAN (O75334) Liprin-alpha-2<br>(Protein tyrosine phosphatase receptor type f polypeptide-interacting protein alpha-2)<br>(PTPRF-interacting protein alpha-2)<br>[MASS=143141] | *    | 0.56  | *    | *    | * | 1 | 1 | QMEEKNR                                                                                                                                             | 1                |
| LPPRC_HUMAN (P42704) 130 kDa leucine-rich protein (LRP 130) (GP130) (Leucine-rich PPR motif-containing protein) [MASS=145200]                                                         | 0.99 | 3.30  | 1.01 | 0.00 | 1 | 2 | 2 | SLLLLGFRSMNINWSEITELLYK<br>C[330]GAIAEQTPILLFLLR                                                                                                    | 1<br>1           |
| LPP_HUMAN (Q93052) Lipoma-preferred partner (LIM domain-containing preferred translocation partner in lipoma) [MASS=65746]                                                            | 0.00 | 3.92  | 0.43 | 0.00 | 1 | 1 | 3 | SLDGIPFTVDAGGLIHC[339]IEDFHKK                                                                                                                       | 1                |
| LRAT_HUMAN (O95237) Lecithin retinol acyltransferase (EC 2.3.1.135)<br>(Phosphatidylcholine--retinol O-acyltransferase)<br>[MASS=25703]                                               | 0.00 | 5.65  | 1.05 | 0.00 | 1 | 1 | 2 | FC[339]ETVKIIRDQR                                                                                                                                   | 1                |
| LRC41_HUMAN (Q15345) Leucine-rich repeat-containing protein 41 (Protein Muf1)<br>[MASS=92287]                                                                                         | *    | 3.32  | *    | *    | * | 2 | 2 | LC[339]DQRFSPLLHSSR<br>3 RPAQFLPEM[147]VAAM[147]K                                                                                                   | 1<br>1           |
| LRC57_HUMAN (Q8N9N7) Leucine-rich repeat-containing protein 57 [MASS=26754]                                                                                                           | 0.00 | 10.46 | 0.34 | 0.00 | 1 | 1 | 3 | LTVLPDEIC[330]NLKKLETLSLNNHLR                                                                                                                       | 1                |
| LRIG3_HUMAN (Q6UXM1) Leucine-rich repeats and immunoglobulin-like domains protein 3 precursor (LIG-3) [MASS=123433]                                                                   | *    | 2.77  | *    | *    | * | 2 | 2 | NRISAIPPKMFK<br>3 ERRMHVM[147]PEDDVFFIVDVK                                                                                                          | 1<br>1           |
| LRP1B_HUMAN (Q9NZR2) Low-density lipoprotein receptor-related protein 1B precursor (Low-density lipoprotein receptor-related protein-deleted in tumor) (LRP-DIT)<br>[MASS=515496]     | 0.00 | 1.44  | 0.41 | 0.00 | 1 | 4 | 3 | LWWADQNLAQLGTC[330]SK<br>3 C[330]LC[330]TDGYEIQPDNPNGC[330]K<br>2 IESASM[147]SGAGRK<br>3 LYWTDGNTINM[147]ANM[147]DGSNSK                             | 1<br>1<br>1<br>1 |
| LRP2_HUMAN (P98164) Low-density lipoprotein receptor-related protein 2 precursor (Megalin) (Glycoprotein 330) (gp330)<br>[MASS=521928]                                                | *    | 1.65  | *    | *    | * | 5 | 2 | NLTNPRGLALDPR<br>3 DC[339]NATTEFM[147]C[339]NNRRC[339]IPR<br>3 RVLLKVTVDM[147]PR<br>2 GSFRC[339]SC[330]DTGYMLES DGR<br>3 WIC[339]DHYNDC[339]GDNSDER | 1<br>1<br>1<br>1 |
| LRP4_HUMAN (O75096) Low-density lipoprotein receptor-related protein 4 precursor (Multiple epidermal growth factor-like domains 7) [MASS=215964]                                      | *    | 2.67  | *    | *    | * | 4 | 1 | TSLEEVEGR<br>3 C[330]SDGSC[330]IAEHWYC[339]DGD TDC[339]K<br>1 LSSSQV<br>3 TGEENC[339]NVNNGGC[339]AQK                                                | 1<br>1<br>1<br>1 |

|                                                                                                                                                                                   |      |       |       |      |   |   |   |                                           |   |
|-----------------------------------------------------------------------------------------------------------------------------------------------------------------------------------|------|-------|-------|------|---|---|---|-------------------------------------------|---|
| LRRK1_HUMAN (Q38SD2) Leucine-rich repeat serine/threonine-protein kinase 1 (EC 2.7.11.1) [MASS=227842]                                                                            | *    | 1.52  | *     | *    | * | 1 | 3 | VDM[147]FSYGM[147]VLYELLSGQRPALGHHQLQIAKK | 1 |
| LSHB_HUMAN (P01229) Lutropin beta chain precursor (Luteinizing hormone subunit beta) (LSH-beta) (LSH-B) (LH-B) [MASS=15345]                                                       | 0.00 | 10.64 | 1.68  | 0.00 | 1 | 1 | 2 | GVDPVVSFPVALSC[339]JR                     | 1 |
| LTBP3_HUMAN (Q9NS15) Latent-transforming growth factor beta-binding protein 3 precursor (LTBP-3) [MASS=139246]                                                                    | 0.00 | 4.76  | 3.63  | 0.00 | 1 | 3 | 3 | GAGSHC[339]PTSQSESNSFWDTSPLLL GKPPR       | 1 |
|                                                                                                                                                                                   |      |       |       |      |   |   | 3 | PPVC[339]EDIDEC[339]RDPSSC[330]PDGK       | 1 |
|                                                                                                                                                                                   |      |       |       |      |   |   | 3 | QPC[330]GSNPLPGLTK                        | 3 |
| LTK_HUMAN (P29376) Leukocyte tyrosine kinase receptor precursor (EC 2.7.10.1) (Protein tyrosine kinase 1) [MASS=91653]                                                            | *    | 5.09  | *     | *    | * | 2 | 3 | TLPELC[330]SPQDELDFLM[147]EALIISK         | 1 |
|                                                                                                                                                                                   |      |       |       |      |   |   | 2 | ATPRLILLELM[147]SGGDM[147]KSFLR           | 1 |
| LUZP1_HUMAN (Q86V48) Leucine zipper protein 1 [MASS=120274]                                                                                                                       | 0.00 | 4.37  | 2.27  | 0.00 | 1 | 3 | 2 | GHVLGNGSQVTQAANSGC[339]SK                 | 1 |
|                                                                                                                                                                                   |      |       |       |      |   |   | 2 | HDITLQLAEAERMADGPLK                       | 1 |
|                                                                                                                                                                                   |      |       |       |      |   |   | 2 | FKLQSLSR                                  | 1 |
| LY75_HUMAN (O60449) Lymphocyte antigen 75 precursor (DEC-205) (gp200-MR6) (CD205 antigen) [MASS=198270]                                                                           | *    | 1.22  | *     | *    | * | 1 | 3 | WAETNGQLEDC[330]VVLDTDGFWK                | 1 |
| M3K14_HUMAN (Q99558) Mitogen-activated protein kinase kinase kinase 14 (EC 2.7.11.25) (NF-kappa beta-inducing kinase) (Serine/threonine-protein kinase NIK) (HsNIK) [MASS=104041] | 0.00 | 4.96  | 0.68  | 0.00 | 1 | 2 | 3 | M[147]AVMEM[147]AC[330]PGAPGSAVGQQKELPKAK | 1 |
|                                                                                                                                                                                   |      |       |       |      |   |   | 3 | GSFGEVHRM[147]EDKQTGFQC[330]AVK           | 1 |
| MACF4_HUMAN (Q96PK2) Microtubule-actin crosslinking factor 1, isoform 4 [MASS=670146]                                                                                             | *    | 0.42  | *     | *    | * | 1 | 3 | NNMGNDTNEEQEKAVTKIEIISHM[147]K            | 1 |
| MAGB5_HUMAN (Q9BZ81) Melanoma-associated antigen B5 (MAGE-B5 antigen) (Fragment) [MASS=13018]                                                                                     | *    | 19.82 | *     | *    | * | 1 | 2 | GNC[330]ANKEDTWKFLDMMQIYDGK               | 1 |
| MALT1_HUMAN (Q9UDY8) Mucosa-associated lymphoid tissue lymphoma translocation protein 1 (EC 3.4.22.-) (MALT lymphoma-associated translocation) (Paracaspase) [MASS=92272]         | 0.00 | 3.16  | 10.36 | 0.00 | 1 | 2 | 2 | ETGLNVFLDLMC[339]JR                       | 1 |
|                                                                                                                                                                                   |      |       |       |      |   |   | 1 | VVSLDLTEYEMR                              | 1 |

|                                                                                                                                                                                                                                                                             |      |      |       |      |   |   |   |                                          |   |
|-----------------------------------------------------------------------------------------------------------------------------------------------------------------------------------------------------------------------------------------------------------------------------|------|------|-------|------|---|---|---|------------------------------------------|---|
| MAON_HUMAN (Q16798) NADP-dependent malic enzyme, mitochondrial precursor (EC 1.1.1.40) (NADP-ME) (Malic enzyme 3) [MASS=67054]                                                                                                                                              | 0.98 | 3.15 | 1.05  | 0.00 | 1 | 1 | 2 | FGINC[339]LIQFEDFANANAFR                 | 1 |
| MAP2_HUMAN (P11137) Microtubule-associated protein 2 (MAP 2) (MAP-2) [MASS=199538]                                                                                                                                                                                          | 1.00 | 3.72 | 0.88  | 0.06 | 2 | 4 | 2 | YTRPRTLSC[330]VK                         | 1 |
|                                                                                                                                                                                                                                                                             |      |      |       |      |   |   | 2 | EEFVETC[330]PSEHK                        | 1 |
|                                                                                                                                                                                                                                                                             |      |      |       |      |   |   | 3 | RPSPHDEEEFEVEEAQAEPK                     | 1 |
|                                                                                                                                                                                                                                                                             |      |      |       |      |   |   | 2 | M[147]EFHDQQELTPSTAEPDQKEK               | 1 |
| MAST3_HUMAN (O60307) Microtubule-associated serine/threonine-protein kinase 3 (EC 2.7.11.1) [MASS=143136]                                                                                                                                                                   | 0.00 | 2.83 | 28.66 | 0.00 | 1 | 2 | 3 | RPVFILGEPDPPPAATPVM[147]PK               | 1 |
|                                                                                                                                                                                                                                                                             |      |      |       |      |   |   | 3 | QVC[339]GTPEYIAPEVIFR                    | 1 |
| MCAT_HUMAN (O43772) Mitochondrial carnitine/acylcarnitine carrier protein (Carnitine/acylcarnitine translocase) (CAC) (Solute carrier family 25 member 20) [MASS=32944]                                                                                                     | *    | 8.64 | *     | *    | * | 1 | 3 | VRLQTQPPSLPGQPPMYSGTFDC[330]FRK          | 1 |
| MCCA_HUMAN (Q96RQ3) Methylcrotonoyl-CoA carboxylase subunit alpha, mitochondrial precursor (EC 6.4.1.4) (3-methylcrotonyl-CoA carboxylase 1) (MCCase alpha subunit) (3-methylcrotonyl-CoA:carbon dioxide ligase subunit alpha) (3-methylcrotonyl-CoA carboxyla [MASS=80473] | 0.92 | 5.24 | 0.87  | 0.00 | 1 | 2 | 2 | ESLC[339]QAALGLILK                       | 1 |
|                                                                                                                                                                                                                                                                             |      |      |       |      |   |   | 2 | SIMAAAGVPVVEGYHGEDQSDQC[330]LJK          | 1 |
| MCCC2_HUMAN (Q9HCC0) Methylcrotonoyl-CoA carboxylase beta chain, mitochondrial precursor (EC 6.4.1.4) (3-Methylcrotonyl-CoA carboxylase 2) (MCCase subunit beta) (3-methylcrotonyl-CoA:carbon dioxide ligase subunit beta) (3-Methylcrotonyl-CoA carboxylase n [MASS=61333] | 0.00 | 6.93 | 0.78  | 0.00 | 1 | 2 | 3 | NIAQIAVVM[147]GSC[339]TAGGAYVPAMADENIIVR | 1 |
|                                                                                                                                                                                                                                                                             |      |      |       |      |   |   | 2 | AQEIAMQNR                                | 1 |
| MCM3A_HUMAN (O60318) 80 kDa MCM3-associated protein (GANP protein) [MASS=218403]                                                                                                                                                                                            | 0.00 | 2.63 | 1.01  | 0.00 | 1 | 3 | 3 | M[147]NPTNPFSGQQPSAFSASSSNVGTLPKPPFR     | 1 |
|                                                                                                                                                                                                                                                                             |      |      |       |      |   |   | 3 | TFVGTG[330]LDM[147]C[330]PEK             | 1 |
|                                                                                                                                                                                                                                                                             |      |      |       |      |   |   | 1 | PFSLKEK                                  | 1 |
| MCM6_HUMAN (Q14566) DNA replication licensing factor MCM6 (p105MCM) [MASS=92889]                                                                                                                                                                                            | *    | 2.31 | *     | *    | * | 1 | 2 | MDLAAAAPGAGSQHLEVR                       | 1 |

|                                                                                                                                                                                   |      |       |      |      |    |   |  |   |                                  |   |
|-----------------------------------------------------------------------------------------------------------------------------------------------------------------------------------|------|-------|------|------|----|---|--|---|----------------------------------|---|
|                                                                                                                                                                                   |      |       |      |      |    |   |  | 1 | TIIP LISQC[339]TPK               | 2 |
|                                                                                                                                                                                   |      |       |      |      |    |   |  | 1 | EGVVEC[330]SFVK                  | 1 |
|                                                                                                                                                                                   |      |       |      |      |    |   |  | 2 | EGVVEC[339]SFVK                  | 1 |
|                                                                                                                                                                                   |      |       |      |      |    |   |  | 1 | GYLGPEQLPDC[339]LK               | 1 |
|                                                                                                                                                                                   |      |       |      |      |    |   |  | 2 | TIIP LISQC[339]TPK               | 1 |
|                                                                                                                                                                                   |      |       |      |      |    |   |  | 2 | SQETEC[339]TYFSTPLLLGK           | 4 |
| MDHM_HUMAN (P40926) Malate dehydrogenase, mitochondrial precursor (EC 1.1.1.37) [MASS=35531]                                                                                      | 1.00 | 19.23 | 1.32 | 0.07 | 19 | 5 |  | 2 | GYLGPEQLPDC[339]LK               | 1 |
|                                                                                                                                                                                   |      |       |      |      |    |   |  | 2 | TIIP LISQC[330]TPK               | 1 |
|                                                                                                                                                                                   |      |       |      |      |    |   |  | 2 | EGVVEC[330]SFVK                  | 1 |
|                                                                                                                                                                                   |      |       |      |      |    |   |  | 2 | SQETEC[330]TYFSTPLLLGK           | 3 |
|                                                                                                                                                                                   |      |       |      |      |    |   |  | 2 | GC[339]DVVVIPAGVPR               | 1 |
|                                                                                                                                                                                   |      |       |      |      |    |   |  | 1 | TIIP LISQC[330]TPK               | 2 |
| MDN1_HUMAN (Q9NU22) Midasin (MIDAS-containing protein) [MASS=632816]                                                                                                              | *    | 2.38  | *    | *    | *  | 7 |  | 3 | NEKAEENTDQASPQEDYAGFERLQSGHLTK   | 1 |
|                                                                                                                                                                                   |      |       |      |      |    |   |  | 2 | KELSPALR                         | 1 |
|                                                                                                                                                                                   |      |       |      |      |    |   |  | 2 | LNSVLEVEKSLVLAKEGSPEDK           | 1 |
|                                                                                                                                                                                   |      |       |      |      |    |   |  | 1 | GPGNLNR                          | 1 |
|                                                                                                                                                                                   |      |       |      |      |    |   |  | 2 | PKC[339]LGEKGKAITMEIVNK          | 1 |
|                                                                                                                                                                                   |      |       |      |      |    |   |  | 3 | FMLFATQNPPLYGGR                  | 1 |
|                                                                                                                                                                                   |      |       |      |      |    |   |  | 3 | THLLTSDSQGGNQMLDEGFVEDFSEQMEIAIR | 1 |
| MDR1_HUMAN (P08183) Multidrug resistance protein 1 (EC 3.6.3.44) (P-glycoprotein 1) (CD243 antigen) [MASS=141461]                                                                 | *    | 0.39  | *    | *    | *  | 1 |  | 1 | KNFFK                            | 1 |
| MDR3_HUMAN (P21439) Multidrug resistance protein 3 (EC 3.6.3.44) (P-glycoprotein 3) [MASS=140681]                                                                                 | *    | 0.70  | *    | *    | *  | 1 |  | 1 | M[147]IGVLT LFR                  | 1 |
| MGA_HUMAN (O43451) Maltase-glucoamylase, intestinal [Includes: Maltase (EC 3.2.1.20) (Alpha-glucosidase); Glucoamylase (EC 3.2.1.3) (Glucan 1,4-alpha-glucosidase)] [MASS=209721] | *    | 1.13  | *    | *    | *  | 1 |  | 3 | QYDIHNLYGYSM[147]AVATAEAAK       | 1 |
| MGR6_HUMAN (O15303) Metabotropic glutamate receptor 6 precursor (mGluR6) [MASS=95436]                                                                                             | 0.00 | 2.74  | 1.06 | 0.00 | 1  | 1 |  | 3 | LLDTC[339]SRDTYALEQALS FVQALIR   | 1 |

|                                                                                                                                                                                                       |      |       |      |      |   |   |   |                                    |   |
|-------------------------------------------------------------------------------------------------------------------------------------------------------------------------------------------------------|------|-------|------|------|---|---|---|------------------------------------|---|
| MGST3_HUMAN (O14880) Microsomal glutathione S-transferase 3 (EC 2.5.1.18) (Microsomal GST-3) (Microsomal GST-III) [MASS=16516]                                                                        | 1.00 | 30.26 | 1.20 | 0.05 | 6 | 2 | 3 | VEYPIM[147]YSTDPENGHIFNC[330]IQR   | 1 |
|                                                                                                                                                                                                       |      |       |      |      |   |   | 3 | VEYPIMYSTDPENGHIFNC[330]IQR        | 1 |
|                                                                                                                                                                                                       |      |       |      |      |   |   | 3 | VEYPIMYSTDPENGHIFNC[339]IQR        | 1 |
|                                                                                                                                                                                                       |      |       |      |      |   |   | 3 | VEYPIM[147]YSTDPENGHIFNC[339]IQR   | 1 |
|                                                                                                                                                                                                       |      |       |      |      |   |   | 3 | YKVEYPIM[147]YSTDPENGHIFNC[330]IQR | 1 |
|                                                                                                                                                                                                       |      |       |      |      |   |   | 3 | YKVEYPIMYSTDPENGHIFNC[339]IQR      | 1 |
| MIF_HUMAN (P14174) Macrophage migration inhibitory factor (MIF) (Phenylpyruvate tautomerase) (EC 5.3.2.1) (Glycosylation-inhibiting factor) (GIF) [MASS=12345]                                        | 0.00 | 7.89  | 1.17 | 0.00 | 1 | 1 | 2 | LLC[330]GLLAER                     | 1 |
| MIRO1_HUMAN (Q8IXI2) Mitochondrial Rho GTPase 1 (EC 3.6.5.-) (MIRO-1) (hMiro-1) (Ras homolog gene family member T1) (Rac-GTP-binding protein-like protein) [MASS=70784]                               | *    | 2.59  | *    | *    | * | 1 | 2 | LTTMAMYPHVTQADLK                   | 1 |
| MKLN1_HUMAN (Q9UL63) Muskelein [MASS=84767]                                                                                                                                                           | 0.00 | 1.50  | 0.16 | 0.00 | 1 | 1 | 3 | LC[330]RPSKDYLLR                   | 2 |
| MLH3_HUMAN (Q9UHC1) DNA mismatch repair protein Mlh3 (MutL protein homolog 3) [MASS=163711]                                                                                                           | 0.00 | 1.38  | 0.16 | 0.00 | 1 | 1 | 3 | NDVSGSM[147]VLQLPKTKDVC[330]SR     | 1 |
| MMSA_HUMAN (Q02252) Methylmalonate-semialdehyde dehydrogenase [acylating], mitochondrial precursor (EC 1.2.1.27) (MMSDH) (Malonate-semialdehyde dehydrogenase [acylating]) (EC 1.2.1.18) [MASS=57839] | 0.98 | 4.11  | 1.40 | 0.00 | 1 | 2 | 2 | EGASILLDGR                         | 1 |
|                                                                                                                                                                                                       |      |       |      |      |   |   | 2 | ERVLC[339]NLIDSGTK                 | 1 |
| MOG_HUMAN (Q16653) Myelin-oligodendrocyte glycoprotein precursor [MASS=28179]                                                                                                                         | 1.00 | 9.72  | 1.51 | 0.16 | 3 | 2 | 2 | FSDEGGFTC[339]FFR                  | 2 |
|                                                                                                                                                                                                       |      |       |      |      |   |   | 2 | ALVGDEVELPC[339]R                  | 1 |
| MP2K5_HUMAN (Q13163) Dual specificity mitogen-activated protein kinase kinase 5 (EC 2.7.12.2) (MAP kinase kinase 5) (MAPKK 5) (MAPK/ERK kinase 5) [MASS=48968]                                        | *    | 4.11  | *    | *    | * | 1 | 3 | C[339]DSSYIIGFYGAFFVENR            | 1 |
| MPCP_HUMAN (Q00325) Phosphate carrier protein, mitochondrial precursor (PTP) (Solute carrier family 25 member 3) [MASS=40095]                                                                         | 1.00 | 19.06 | 0.98 | 0.08 | 2 | 4 | 2 | LPRPPPEM[147]PESLKK                | 1 |
|                                                                                                                                                                                                       |      |       |      |      |   |   | 3 | ANPFNTPHLQLVHDGLGDLRSSSPGPTGQPRR   | 1 |
|                                                                                                                                                                                                       |      |       |      |      |   |   | 2 | FAC[330]FER                        | 1 |
|                                                                                                                                                                                                       |      |       |      |      |   |   | 2 | GWAPTFLGYSMQGLC[330]JK             | 1 |
| MPP9_HUMAN (Q99550) M-phase phosphoprotein 9 [MASS=78084]                                                                                                                                             | *    | 2.31  | *    | *    | * | 1 | 2 | REIM[147]LTPVTVAAYSPKR             | 1 |

|                                                                                                                                                                             |      |       |      |      |   |   |   |                                       |   |
|-----------------------------------------------------------------------------------------------------------------------------------------------------------------------------|------|-------|------|------|---|---|---|---------------------------------------|---|
| MSH5_HUMAN (O43196) MutS protein homolog 5 [MASS=92875]                                                                                                                     | *    | 1.80  | *    | *    | * | 1 | 2 | TFVPNSTEC[330]GGDKGR                  | 1 |
| MTCH2_HUMAN (Q9Y6C9) Mitochondrial carrier homolog 2 (Met-induced mitochondrial protein) [MASS=33331]                                                                       | 0.99 | 6.93  | 1.09 | 0.00 | 1 | 1 | 3 | QVC[339]QLPGLFSYAQHIASIDGR            | 1 |
| MTMR5_HUMAN (O95248) SET-binding factor 1 (Sbf1) (Myotubularin-related protein 5) [MASS=208255]                                                                             | 0.00 | 0.54  | 0.14 | 0.00 | 1 | 1 | 3 | NC[330]ISYVFEGK                       | 1 |
| MTMR7_HUMAN (Q9Y216) Myotubularin-related protein 7 (EC 3.1.3.-) [MASS=75806]                                                                                               | *    | 5.91  | *    | *    | * | 2 | 2 | YEELYC[339]FSFNPM[147]LDK             | 1 |
|                                                                                                                                                                             |      |       |      |      |   |   | 2 | AALGTLYL TATHVIFVENS PDARK            | 1 |
| MTX2_HUMAN (O75431) Metaxin-2 [MASS=29763]                                                                                                                                  | 1.00 | 14.07 | 0.96 | 0.07 | 3 | 2 | 2 | NYSNLLAFC[339]R                       | 1 |
|                                                                                                                                                                             |      |       |      |      |   |   | 2 | NYSNLLAFC[330]R                       | 1 |
|                                                                                                                                                                             |      |       |      |      |   |   | 3 | GEQILLSDNAASLAVQAFLQM[147]C[339]NLPIK | 1 |
| MY18A_HUMAN (Q92614) Myosin-18A (Myosin XVIIIa) (Myosin containing PDZ domain) (Molecule associated with JAK3 N-terminus) (MAJN) [MASS=233113]                              | *    | 1.02  | *    | *    | * | 2 | 1 | LTETNA                                | 1 |
|                                                                                                                                                                             |      |       |      |      |   |   | 2 | GAPAVYSEKVMHM[147]FK                  | 1 |
| MYCB2_HUMAN (O75592) Probable ubiquitin ligase protein MYCBP2 (EC 6.3.2.-) (Myc-binding protein 2) (Protein associated with Myc) (Pam/highwire/rpm-1 protein) [MASS=510165] | *    | 2.69  | *    | *    | * | 8 | 3 | DPPKGM[147]IPPGTQLVKPK                | 1 |
|                                                                                                                                                                             |      |       |      |      |   |   | 2 | M[147]LVIVVLPVRNSLR                   | 1 |
|                                                                                                                                                                             |      |       |      |      |   |   | 3 | SPVRC[339]IATTR                       | 1 |
|                                                                                                                                                                             |      |       |      |      |   |   | 2 | LISAHSSLSK                            | 1 |
|                                                                                                                                                                             |      |       |      |      |   |   | 2 | ELYEDVR                               | 1 |
|                                                                                                                                                                             |      |       |      |      |   |   | 3 | LLQTISDLMMSLPSGSSLQQMALRC[339]WSLK    | 1 |
|                                                                                                                                                                             |      |       |      |      |   |   | 2 | FSADTDILLGGLGFGGR                     | 1 |
|                                                                                                                                                                             |      |       |      |      |   |   | 2 | SVDEGSNKVHFSIGKAPLK                   | 1 |
| MYLIP_HUMAN (Q8WY64) Ubiquitin ligase MYLIP (EC 6.3.2.-) (Myosin regulatory light chain-interacting protein) (MIR) [MASS=49910]                                             | 0.00 | 1.80  | *    | *    | * | 1 | 2 | HIFFLHIK                              | 1 |
| MYLK2_HUMAN (Q9H1R3) Myosin light chain kinase 2, skeletal/cardiac muscle (EC 2.7.11.18) (MLCK2) [MASS=64553]                                                               | 0.00 | 3.70  | *    | *    | * | 2 | 2 | EM[147]VLEIEVMNQLNHR                  | 1 |
|                                                                                                                                                                             |      |       |      |      |   |   | 1 | APASEK                                | 1 |
| MYO10_HUMAN (Q9HD67) Myosin-10 (Myosin X) [MASS=237389]                                                                                                                     | 0.00 | 1.36  | 1.18 | 0.00 | 1 | 2 | 2 | RPTVSSQFK                             | 1 |
|                                                                                                                                                                             |      |       |      |      |   |   | 3 | RHLGELPPHIFAIANEC[339]YR              | 1 |
| MYO6_HUMAN (Q9UM54) Myosin-6 (Myosin VI) [MASS=148713]                                                                                                                      | 0.00 | 1.56  | 1.87 | 0.00 | 1 | 1 | 3 | SAQSLEYC[339]AELLGLDQDDL              | 1 |
| MYOM2_HUMAN (P54296) Myomesin-2 (M-protein) (165 kDa titin-associated protein) (165 kDa connectin-associated protein) [MASS=164793]                                         | 0.00 | 3.00  | 0.07 | 0.00 | 1 | 3 | 2 | EGETVTLKC[330]TMLVTPDLK               | 2 |
|                                                                                                                                                                             |      |       |      |      |   |   | 2 | YVSM[147]TIKGVTSSEDSGK                | 1 |
|                                                                                                                                                                             |      |       |      |      |   |   | 2 | C[330]TMLVTPDLK                       | 1 |

|                                                                                                                                                                                                                                                                              |      |       |       |      |    |   |   |   |                                     |   |
|------------------------------------------------------------------------------------------------------------------------------------------------------------------------------------------------------------------------------------------------------------------------------|------|-------|-------|------|----|---|---|---|-------------------------------------|---|
|                                                                                                                                                                                                                                                                              |      |       |       |      |    |   |   | 2 | VC[330]GSNLLSIC[330]K               | 1 |
|                                                                                                                                                                                                                                                                              |      |       |       |      |    |   |   | 1 | TSASIGSLC[330]ADAR                  | 2 |
|                                                                                                                                                                                                                                                                              |      |       |       |      |    |   |   | 2 | VC[339]GSNLLSIC[339]K               | 2 |
|                                                                                                                                                                                                                                                                              |      |       |       |      |    |   |   | 1 | TSASIGSLC[339]ADAR                  | 1 |
|                                                                                                                                                                                                                                                                              |      |       |       |      |    |   |   | 1 | VC[330]HC[330]LGK                   | 1 |
|                                                                                                                                                                                                                                                                              |      |       |       |      |    |   |   | 1 | VC[330]GSNLLSIC[330]K               | 1 |
|                                                                                                                                                                                                                                                                              |      |       |       |      |    |   |   | 2 | TSASIGSLC[330]ADAR                  | 5 |
| MYPR_HUMAN (P60201) Myelin proteolipid protein (PLP) (Lipophilin) [MASS=29946]                                                                                                                                                                                               | 1.00 | 14.13 | 0.98  | 0.08 | 18 | 4 |   |   |                                     |   |
|                                                                                                                                                                                                                                                                              |      |       |       |      |    |   |   | 1 | LMGRGTKF                            | 3 |
|                                                                                                                                                                                                                                                                              |      |       |       |      |    |   |   | 2 | TSASIGSLC[339]ADAR                  | 5 |
| MYST3_HUMAN (Q92794) Histone acetyltransferase MYST3 (EC 2.3.1.48) (EC 2.3.1.-) (MYST protein 3) (MOZ, YBF2/SAS3, SAS2 and TIP60 protein 3) (Runt-related transcription factor-binding protein 2) (Monocytic leukemia zinc finger protein) (Zinc finger protei [MASS=225054] | *    | 1.85  | *     | *    | *  | 2 | 3 | 1 | TLYYDVEPFLFYVLTQNDVKGC[330]HLVGYFSK | 1 |
|                                                                                                                                                                                                                                                                              |      |       |       |      |    |   | 1 | 1 | VRTGPGR                             | 1 |
| N4BM_HUMAN (O95298) NADH-ubiquinone oxidoreductase subunit B14.5b (EC 1.6.5.3) (EC 1.6.99.3) (Complex I-B14.5b) (CI-B14.5b) [MASS=14187]                                                                                                                                     | 0.99 | 36.97 | 1.32  | 0.00 | 1  | 3 | 2 | 2 | EM[147]FGYMK                        | 2 |
|                                                                                                                                                                                                                                                                              |      |       |       |      |    |   | 3 | 3 | FLPDEARSLPPPCLTDPR                  | 1 |
|                                                                                                                                                                                                                                                                              |      |       |       |      |    |   | 2 | 2 | LLYIGFLGYC[339]SGLIDLIR             | 1 |
| NAC3_HUMAN (P57103) Sodium/calcium exchanger 3 precursor (Na+)/Ca(2+)-exchange protein 3) [MASS=103009]                                                                                                                                                                      | 0.00 | 2.80  | 13.09 | 0.00 | 1  | 1 | 3 | 3 | AEAGSGDVPSTGQNNESC[339]SGSSDC[339]K | 1 |
| NADK_HUMAN (O95544) NAD kinase (EC 2.7.1.23) (Poly(P)/ATP NAD kinase) [MASS=49228]                                                                                                                                                                                           | 0.00 | 7.40  | 0.92  | 0.00 | 1  | 2 | 3 | 3 | QAMQYQVLNEVIDR                      | 1 |
|                                                                                                                                                                                                                                                                              |      |       |       |      |    |   | 2 | 2 | ELC[330]THLMEENMIVYVEKK             | 1 |



|                                                                                                                                                                                                                                             |      |       |      |      |   |   |   |                                                        |        |
|---------------------------------------------------------------------------------------------------------------------------------------------------------------------------------------------------------------------------------------------|------|-------|------|------|---|---|---|--------------------------------------------------------|--------|
| NALP1_HUMAN (Q9C000) NACHT, LRR and PYD-containing protein 1 (Death effector filament-forming ced-4-like apoptosis protein) (Nucleotide-binding domain and caspase recruitment domain) (Caspase recruitment domain protein 7) [MASS=165865] | 0.00 | 2.38  | 0.32 | 0.00 | 1 | 2 | 2 | IHKPPPLTPLYMGC[330]R<br>WVPVTDAYWQILFVSLKVTR           | 1<br>1 |
| NAP5_HUMAN (O14513) Nck-associated protein 5 (NAP-5) (Fragment) [MASS=44829]                                                                                                                                                                | 0.00 | 4.33  | *    | *    | * | 2 | 1 | VSPKRGVPK                                              | 2      |
| NARG1_HUMAN (Q9BXJ9) NMDA receptor-regulated protein 1 (N-terminal acetyltransferase) (Tubedown-1 protein) (Tbdn100) (Gastric cancer antigen Ga19) [MASS=101272]                                                                            | 0.00 | 4.62  | 7.23 | 0.00 | 1 | 2 | 3 | EGTSAVENLNEMQC[339]MWFQTEC[339]AQAYK<br>LEDAADVYRGLQER | 1<br>1 |
| NCA11_HUMAN (P13591) Neural cell adhesion molecule 1, 140 kDa isoform precursor (N-CAM 140) (NCAM-140) (CD56 antigen) [MASS=93360]                                                                                                          | 0.99 | 1.30  | 0.87 | 0.00 | 1 | 1 | 2 | FFLC[330]QVAGDAK                                       | 1      |
| NCAM2_HUMAN (O15394) Neural cell adhesion molecule 2 precursor (N-CAM 2) [MASS=92932]                                                                                                                                                       | 0.00 | 2.39  | 0.23 | 0.00 | 1 | 2 | 2 | MC[339]GKKSGSSGK<br>GEEMTFSC[330]R                     | 1<br>1 |
| NDRG2_HUMAN (Q9UN36) Protein NDRG2 (Protein Syld709613) [MASS=40798]                                                                                                                                                                        | 1.00 | 5.66  | 0.78 | 0.00 | 1 | 1 | 2 | SC[330]FQPLFQFEDM[147]QEIIQNFVR                        | 1      |
| NDUA2_HUMAN (O43678) NADH dehydrogenase [ubiquinone] 1 alpha subcomplex subunit 2 (EC 1.6.5.3) (EC 1.6.99.3) (NADH-ubiquinone oxidoreductase B8 subunit) (Complex I-B8) (CI-B8) [MASS=10790]                                                | 0.00 | 6.12  | 1.15 | 0.00 | 1 | 1 | 2 | IHLC[339]QR                                            | 1      |
| NDUA5_HUMAN (Q16718) NADH dehydrogenase [ubiquinone] 1 alpha subcomplex subunit 5 (EC 1.6.5.3) (EC 1.6.99.3) (NADH-ubiquinone oxidoreductase 13 kDa-B subunit) (Complex I-13Kd-B) (CI-13Kd-B) (Complex I subunit B13) [MASS=13327]          | 1.00 | 13.91 | 1.40 | 0.00 | 2 | 1 | 2 | TTGLVGLAVC[339]NTPHER<br>TTGLVGLAVC[330]NTPHER         | 1<br>1 |

|                                                                                                                                                                                                                                 |      |       |      |      |   |   |                                                                                                                                                                     |                                 |   |
|---------------------------------------------------------------------------------------------------------------------------------------------------------------------------------------------------------------------------------|------|-------|------|------|---|---|---------------------------------------------------------------------------------------------------------------------------------------------------------------------|---------------------------------|---|
| NDUA7_HUMAN (O95182) NADH dehydrogenase [ubiquinone] 1 alpha subcomplex subunit 7 (EC 1.6.5.3) (EC 1.6.99.3) (NADH-ubiquinone oxidoreductase subunit B14.5a) (Complex I-B14.5a) (CI-B14.5a) [MASS=12420]                        | 0.93 | 8.04  | 1.65 | 0.00 | 1 | 1 | 2                                                                                                                                                                   | LSNNYYC[339]TR                  | 1 |
| NDUA8_HUMAN (P51970) NADH dehydrogenase [ubiquinone] 1 alpha subcomplex subunit 8 (EC 1.6.5.3) (EC 1.6.99.3) (NADH-ubiquinone oxidoreductase 19 kDa subunit) (Complex I-19KD) (CI-19KD) (Complex I-PGIV) (CI-PGIV) [MASS=19974] | 1.00 | 29.82 | 1.14 | 0.09 | 6 | 4 | 2 C[330]ALDFFR<br>3 AAAHHYGAQC[339]DKPNK<br>2 AAAHHYGAQC[339]DKPNK<br>1 C[339]ALDFFR<br>2 FDEC[330]VLDK<br>3 AAAHHYGAQC[330]DKPNKEFM[147]LC[330]R<br>2 C[339]ALDFFR | 1<br>1<br>1<br>1<br>1<br>1<br>1 |   |
| NDUAA_HUMAN (O95299) NADH dehydrogenase [ubiquinone] 1 alpha subcomplex subunit 10, mitochondrial precursor (EC 1.6.5.3) (EC 1.6.99.3) (NADH-ubiquinone oxidoreductase 42 kDa subunit) (Complex I-42KD) (CI-42KD) [MASS=40750]  | 1.00 | 16.62 | 0.87 | 0.01 | 2 | 3 | 2 C[339]EVLQYSAR<br>3 TFLPEM[147]SEKC[330]EVLQYSAR<br>3 HFPEAGIHYPDSTTGDGKPLATDYNGNC[339]SLEK<br>3 TFLPEM[147]SEKC[339]EVLQYSAR                                     | 1<br>1<br>1<br>1                |   |
| NDUB7_HUMAN (P17568) NADH dehydrogenase [ubiquinone] 1 beta subcomplex subunit 7 (EC 1.6.5.3) (EC 1.6.99.3) (NADH-ubiquinone oxidoreductase B18 subunit) (Complex I-B18) (CI-B18) (Cell adhesion protein SQM1) [MASS=16271]     | 1.00 | 6.62  | 1.14 | 0.00 | 2 | 1 | 2 DYC[330]AHLIR<br>2 DYC[339]AHLIR                                                                                                                                  | 1<br>1                          |   |
| NDUBA_HUMAN (O96000) NADH dehydrogenase [ubiquinone] 1 beta subcomplex subunit 10 (EC 1.6.5.3) (EC 1.6.99.3) (NADH-ubiquinone oxidoreductase PDSW subunit) (Complex I-PDSW) (CI-PDSW) [MASS=20645]                              | 0.23 | 6.43  | 0.99 | 0.00 | 1 | 1 | 2 EGQNYQQNC[330]JK                                                                                                                                                  | 1                               |   |
| NEGR1_HUMAN (Q7Z3B1) Neuronal growth regulator 1 precursor [MASS=38719]                                                                                                                                                         | 0.00 | 2.54  | 0.65 | 0.00 | 1 | 1 | 2 C[330]YLEDGASK                                                                                                                                                    | 1                               |   |
| NEIL1_HUMAN (Q96F14) Endonuclease VIII-like 1 (EC 3.2.2.-) (EC 4.2.99.18) (Nei-like 1) (DNA glycosylase/AP lyase Neil1) (DNA-(apurinic or apyrimidinic site) lyase Neil1) (NEH1) (FPG1) [MASS=43553]                            | 0.00 | 5.66  | 0.72 | 0.00 | 1 | 1 | 3 WQPGRGPC[330]VLQEYQQFRENVLRL                                                                                                                                      | 1                               |   |

|                                                                                                                                                                                   |      |       |       |      |   |   |   |                                          |   |
|-----------------------------------------------------------------------------------------------------------------------------------------------------------------------------------|------|-------|-------|------|---|---|---|------------------------------------------|---|
| NEIL3_HUMAN (Q8TAT5) Endonuclease VIII-like 3 (Nei-like 3) (DNA glycosylase FPG2) [MASS=67893]                                                                                    | 0.00 | 13.39 | 2.19  | 0.00 | 1 | 5 | 3 | M[147]VEGPGC[339]TLNGEKIRAR              | 1 |
|                                                                                                                                                                                   |      |       |       |      |   |   | 2 | IRARVLPQAVTGVR                           | 1 |
|                                                                                                                                                                                   |      |       |       |      |   |   | 2 | VDHVMDSVAR                               | 1 |
|                                                                                                                                                                                   |      |       |       |      |   |   | 3 | QNQILDEEFQNSPPASVC[330]LNDIQHPSKK        | 1 |
|                                                                                                                                                                                   |      |       |       |      |   |   | 2 | VLPQAVTGVR                               | 1 |
| NELFB_HUMAN (Q8WX92) Negative elongation factor B (NELF-B) (Cofactor of BRCA1) [MASS=65697]                                                                                       | 0.00 | 2.24  | 10.00 | 0.00 | 1 | 1 | 2 | MPSLQPVVM[147]C[339]VM[147]K             | 1 |
| NGN2_HUMAN (Q9H2A3) Neurogenin 2 [MASS=28621]                                                                                                                                     | 0.00 | 5.15  | 1.47  | 0.00 | 1 | 1 | 2 | GGVAAGAEGC[339]RPAR                      | 1 |
| NIBA_HUMAN (Q9BZQ8) Niban protein [MASS=103134]                                                                                                                                   | 0.00 | 3.66  | 3.38  | 0.00 | 1 | 1 | 3 | SC[339]LESVQPFLASILEELMGPVSSGFSEVRVLF EK | 1 |
| NIPM_HUMAN (O43920) NADH-ubiquinone oxidoreductase 15 kDa subunit (EC 1.6.5.3) (EC 1.6.99.3) (Complex I-15 kDa) (CI-15 kDa) [MASS=12386]                                          | 0.61 | 11.43 | 0.44  | 0.00 | 1 | 1 | 2 | IEYDDFVEC[339]LLR                        | 1 |
| NIT1_HUMAN (Q86X76) Nitrilase homolog 1 (EC 3.5.-.-) [MASS=35896]                                                                                                                 | 0.99 | 5.20  | 1.05  | 0.00 | 1 | 1 | 2 | LGAC[339]LAFLPEAFDFIAR                   | 1 |
| NMDE1_HUMAN (Q12879) Glutamate [NMDA] receptor subunit epsilon 1 precursor (N-methyl D-aspartate receptor subtype 2A) (NR2A) (NMDAR2A) (hNR2A) [MASS=165281]                      | *    | 4.85  | *     | *    | * | 3 | 2 | PHDYSPPFRFGTVPNGSTERNIR                  | 1 |
|                                                                                                                                                                                   |      |       |       |      |   |   | 3 | KSVDSIRQDSLSQNPVSQR                      | 1 |
|                                                                                                                                                                                   |      |       |       |      |   |   | 3 | GDSTLPMNRNPLHNEEGLSNNDQYKLYSK            | 1 |
| NNTM_HUMAN (Q13423) NAD(P) transhydrogenase, mitochondrial precursor (EC 1.6.1.2) (Pyridine nucleotide transhydrogenase) (Nicotinamide nucleotide transhydrogenase) [MASS=113895] | 1.00 | 0.83  | 1.01  | 0.02 | 4 | 1 | 2 | KTC[339]DALQAK                           | 2 |
|                                                                                                                                                                                   |      |       |       |      |   |   | 2 | KTC[330]DALQAK                           | 2 |
| NOL8_HUMAN (Q76FK4) Nucleolar protein 8 (Nucleolar protein Nop132) [MASS=131616]                                                                                                  | 0.00 | 3.86  | 4.13  | 0.00 | 1 | 3 | 3 | VSC[339]HSDDDIMR                         | 1 |
|                                                                                                                                                                                   |      |       |       |      |   |   | 3 | NVAKVKNSTEFSQM[147]EK                    | 1 |
|                                                                                                                                                                                   |      |       |       |      |   |   | 3 | FQAFKGVGC[330]LYEKESMK                   | 1 |
| NPC1_HUMAN (O15118) Niemann-Pick C1 protein precursor [MASS=142166]                                                                                                               | *    | 3.52  | *     | *    | * | 3 | 2 | KARLIASNVTEM[147]GINGSAYR                | 1 |
|                                                                                                                                                                                   |      |       |       |      |   |   | 2 | PQGGDFMR                                 | 1 |
|                                                                                                                                                                                   |      |       |       |      |   |   | 3 | FFKNSYSPLLLKDWMMR                        | 1 |
| NPTN_HUMAN (Q9Y639) Neuroplastin precursor (Stromal cell-derived receptor 1) (SDR-1) [MASS=31291]                                                                                 | 1.00 | 6.38  | 0.91  | 0.00 | 1 | 1 | 2 | AEDSGEYHC[339]VYHFVSAPK                  | 1 |

|                                                                                                                                                                                                                                                                              |               |      |      |      |   |   |   |                                       |   |
|------------------------------------------------------------------------------------------------------------------------------------------------------------------------------------------------------------------------------------------------------------------------------|---------------|------|------|------|---|---|---|---------------------------------------|---|
| NRG2_HUMAN (O14511) Pro-neuregulin-2, membrane-bound isoform precursor (Pro-NRG2) [Contains: Neuregulin-2 (NRG-2) (Neural- and thymus-derived activator for ERBB kinases) (NTAK) (Divergent of neuregulin-1) (DON-1)] [MASS=91678]                                           | 0.00          | 5.76 | 0.28 | 0.00 | 1 | 3 | 3 | RDPAPGFSMLLFGVSLAC[339]YSPSLKSVQDQAYK | 1 |
|                                                                                                                                                                                                                                                                              |               |      |      |      |   |   | 2 | QNM[147]C[330]PAHQNR                  | 1 |
|                                                                                                                                                                                                                                                                              |               |      |      |      |   |   | 1 | RTSAGPR                               | 1 |
| NRP1_HUMAN (O14786) Neuropilin-1 precursor (Vascular endothelial cell growth factor 165 receptor) (CD304 antigen) [MASS=103120]                                                                                                                                              | *             | 0.54 | *    | *    | * | 1 | 1 | HRENK                                 | 1 |
| NSD1_HUMAN (Q96L73) Histone-lysine N-methyltransferase, H3 lysine-36 and H4 lysine-20 specific (EC 2.1.1.43) (H3-K36-HMTase) (H4-K20-HMTase) (Nuclear receptor-binding SET domain-containing protein 1) (NR-binding SET domain-containing protein) (Androgen r [MASS=296650] | *             | 1.41 | *    | *    | * | 3 | 2 | C[339]AESEQK                          | 1 |
|                                                                                                                                                                                                                                                                              |               |      |      |      |   |   | 3 | FSTLLMMLKDMHDSKTK                     | 1 |
|                                                                                                                                                                                                                                                                              |               |      |      |      |   |   | 3 | LLITSSPKPQTSDR                        | 1 |
| NSF_HUMAN (P46459) Vesicle-fusing ATPase (EC 3.6.4.6) (Vesicular-fusion protein NSF) (N-ethylmaleimide sensitive fusion protein) (NEM-sensitive fusion protein) [MASS=82654]                                                                                                 | 1.00          | 7.66 | 1.07 | 0.05 | 4 | 4 | 1 | GILLYGPPGC[339]GK                     | 1 |
|                                                                                                                                                                                                                                                                              |               |      |      |      |   |   | 3 | KLLM[147]LIEM[147]SLQMDPEYRVR         | 1 |
|                                                                                                                                                                                                                                                                              |               |      |      |      |   |   | 2 | GILLYGPPGC[339]GK                     | 1 |
|                                                                                                                                                                                                                                                                              |               |      |      |      |   |   | 2 | SQLSC[339]VVVDDIER                    | 1 |
|                                                                                                                                                                                                                                                                              |               |      |      |      |   |   | 2 | SQLSC[330]VVVDDIER                    | 1 |
| 3                                                                                                                                                                                                                                                                            | EFSDIFRRAFAFR | 1    |      |      |   |   |   |                                       |   |
| NTRK1_HUMAN (P04629) High affinity nerve growth factor receptor precursor (EC 2.7.10.1) (Neurotrophic tyrosine kinase receptor type 1) (TRK1 transforming tyrosine kinase protein) (p140-TrkA) (Trk-A) [MASS=87497]                                                          | *             | 3.52 | *    | *    | * | 2 | 2 | NC[339]LVGQGLVVK                      | 1 |
|                                                                                                                                                                                                                                                                              |               |      |      |      |   |   | 2 | TMLPIRWM[147]PPESILYRK                | 1 |
| NU160_HUMAN (Q12769) Nuclear pore complex protein Nup160 (Nucleoporin Nup160) (160 kDa nucleoporin) [MASS=149000]                                                                                                                                                            | *             | 5.09 | *    | *    | * | 3 | 2 | HFREFTVC[330]SIGTANAVAGAVK            | 1 |
|                                                                                                                                                                                                                                                                              |               |      |      |      |   |   | 3 | LRLAYSPTMGLYLGIYM[147]HAPK            | 1 |
|                                                                                                                                                                                                                                                                              |               |      |      |      |   |   | 3 | NHDGEC[339]TAAPTNRQIEILELEDLEK        | 1 |
| NU5M_HUMAN (P03915) NADH-ubiquinone oxidoreductase chain 5 (EC 1.6.5.3) (NADH dehydrogenase subunit 5) [MASS=67026]                                                                                                                                                          | 0.41          | 7.30 | 1.12 | 0.00 | 1 | 2 | 3 | SPLC[330]TFYFSNM[147]LGFYPSITHR       | 1 |
|                                                                                                                                                                                                                                                                              |               |      |      |      |   |   | 3 | LTALAVTFLGLLTALDLNLYLTNK              | 1 |
| NUAK1_HUMAN (O60285) NUAK family, SNF1-like kinase 1 (EC 2.7.11.1) (AMPK-related protein kinase 5) [MASS=74305]                                                                                                                                                              | *             | 1.97 | *    | *    | * | 1 | 3 | LENILLDDNC[330]NIK                    | 1 |

|                                                                                                                                                                                                   |               |       |      |      |    |   |                                                                                                                                                               |                                            |      |
|---------------------------------------------------------------------------------------------------------------------------------------------------------------------------------------------------|---------------|-------|------|------|----|---|---------------------------------------------------------------------------------------------------------------------------------------------------------------|--------------------------------------------|------|
| NUAM_HUMAN (P28331) NADH-ubiquinone oxidoreductase 75 kDa subunit, mitochondrial precursor (EC 1.6.5.3) (EC 1.6.99.3) (Complex I-75Kd) (CI-75Kd) [MASS=79467]                                     | 1.00          | 9.49  | 1.15 | 0.10 | 5  | 5 | 2                                                                                                                                                             | VLFLLGADGGC[339]ITR                        | 1    |
|                                                                                                                                                                                                   |               |       |      |      |    |   | 3                                                                                                                                                             | DC[339]FIIYQGHHDVGVGAPIADVILPGAAYTEK       | 1    |
|                                                                                                                                                                                                   |               |       |      |      |    |   | 1                                                                                                                                                             | FC[339]YHER                                | 1    |
|                                                                                                                                                                                                   |               |       |      |      |    |   | 2                                                                                                                                                             | VVAAC[330]AM[147]PVM[147]K                 | 1    |
|                                                                                                                                                                                                   |               |       |      |      |    |   | 2                                                                                                                                                             | MC[330]LVEIEK                              | 1    |
|                                                                                                                                                                                                   |               |       |      |      |    |   | 1                                                                                                                                                             | FC[330]YHER                                | 1    |
|                                                                                                                                                                                                   |               |       |      |      |    |   | 2                                                                                                                                                             | LLEGC[339]LVGGR                            | 1    |
|                                                                                                                                                                                                   |               |       |      |      |    |   | 3                                                                                                                                                             | LKPPFPADVGVFGC[330]PTTVANVETVAVSPTIC[339]R | 1    |
|                                                                                                                                                                                                   |               |       |      |      |    |   | 2                                                                                                                                                             | HESC[339]GQC[339]TPC[339]R                 | 1    |
|                                                                                                                                                                                                   |               |       |      |      |    |   | 2                                                                                                                                                             | NAC[339]GSGYDFDFVVR                        | 1    |
| NUBM_HUMAN (P49821) NADH-ubiquinone oxidoreductase 51 kDa subunit, mitochondrial precursor (EC 1.6.5.3) (EC 1.6.99.3) (Complex I-51KD) (CI-51KD) (NADH dehydrogenase flavoprotein 1) [MASS=50817] | 1.00          | 33.62 | 1.08 | 0.13 | 11 | 8 | 2                                                                                                                                                             | GAGAYIC[339]GEETALIESIEGK                  | 2    |
|                                                                                                                                                                                                   |               |       |      |      |    |   | 3                                                                                                                                                             | LFNISGHVNHPC[339]TVEEEM[147]SVPLK          | 1    |
|                                                                                                                                                                                                   |               |       |      |      |    |   | 2                                                                                                                                                             | LLEGC[330]LVGGR                            | 1    |
|                                                                                                                                                                                                   |               |       |      |      |    |   | 3                                                                                                                                                             | LIEFYKHESC[330]GQC[330]TPC[330]R           | 1    |
|                                                                                                                                                                                                   |               |       |      |      |    |   | 3                                                                                                                                                             | LFNISGHVNHPC[339]TVEEEM[147]SVPLKELIEK     | 1    |
|                                                                                                                                                                                                   |               |       |      |      |    |   | 3                                                                                                                                                             | LKPPFPADVGVFGC[339]PTTVANVETVAVSPTIC[339]R | 1    |
|                                                                                                                                                                                                   |               |       |      |      |    |   | 2                                                                                                                                                             | NAC[330]GSGYDFDFVVR                        | 1    |
|                                                                                                                                                                                                   |               |       |      |      |    |   | 2                                                                                                                                                             | ELTERFEDVWVSGPLTLQPTR                      | 1    |
|                                                                                                                                                                                                   |               |       |      |      |    |   | 2                                                                                                                                                             | C[339]YTNHALSYDQAK                         | 1    |
|                                                                                                                                                                                                   |               |       |      |      |    |   | NUCM_HUMAN (O75306) NADH-ubiquinone oxidoreductase 49 kDa subunit, mitochondrial precursor (EC 1.6.5.3) (EC 1.6.99.3) (Complex I-49KD) (CI-49KD) [MASS=52545] | 0.90                                       | 7.34 |
| 2                                                                                                                                                                                                 | IIAQC[330]LNK | 1     |      |      |    |   |                                                                                                                                                               |                                            |      |
| 1                                                                                                                                                                                                 | VSPPKR        | 1     |      |      |    |   |                                                                                                                                                               |                                            |      |
| NUIM_HUMAN (O00217) NADH-ubiquinone oxidoreductase 23 kDa subunit, mitochondrial precursor (EC 1.6.5.3) (EC 1.6.99.3) (Complex I-23KD) (CI-23KD) (TYKY subunit) [MASS=23705]                      | 1.00          | 8.57  | 1.45 | 0.00 | 1  | 1 | 2                                                                                                                                                             | LC[339]EAIC[339]PAQAITIEAEPR               | 1    |
|                                                                                                                                                                                                   |               |       |      |      |    |   | 2                                                                                                                                                             | IVPVDIYIPGC[339]PPTAEALLYGILQLQR           | 1    |
| NUKM_HUMAN (O75251) NADH-ubiquinone oxidoreductase 20 kDa subunit, mitochondrial precursor (EC 1.6.5.3) (EC 1.6.99.3) (Complex I-20KD) (CI-20KD) (PSST subunit) [MASS=23563]                      | 1.00          | 22.07 | 0.77 | 0.00 | 1  | 2 | 3                                                                                                                                                             | QSDVM[147]IVAGTLTNKM[147]APALR             | 2    |
|                                                                                                                                                                                                   |               |       |      |      |    |   | 2                                                                                                                                                             | MTM[147]LLLYHSTM[147]SSKSPR                | 1    |
| NUMA1_HUMAN (Q14980) Nuclear mitotic apparatus protein 1 (NuMA protein) (SP-H antigen) [MASS=238273]                                                                                              | *             | 0.80  | *    | *    | *  | 1 | 2                                                                                                                                                             | MTM[147]LLLYHSTM[147]SSKSPR                | 1    |

|                                                                                                                                                                       |      |       |      |      |   |   |   |                                                   |   |
|-----------------------------------------------------------------------------------------------------------------------------------------------------------------------|------|-------|------|------|---|---|---|---------------------------------------------------|---|
| NUMM_HUMAN (O75380) NADH-ubiquinone oxidoreductase 13 kDa-A subunit, mitochondrial precursor (EC 1.6.5.3) (EC 1.6.99.3) (Complex I-13KD-A) (CI-13KD-A) [MASS=13712]   | 1.00 | 12.10 | 1.16 | 0.04 | 3 | 1 | 2 | VIAC[339]DGGGGALGHPK                              | 1 |
|                                                                                                                                                                       |      |       |      |      |   |   | 2 | VIAC[330]DGGGGALGHPK                              | 2 |
| NUP50_HUMAN (Q9UKX7) Nucleoporin 50 kDa (Nuclear pore-associated protein 60 kDa-like) [MASS=50144]                                                                    | *    | 3.63  | *    | *    | * | 1 | 2 | VKTSEDADELHKILLEK                                 | 1 |
| NUP53_HUMAN (Q8NFH5) Nucleoporin NUP53 (Nuclear pore complex protein Nup53) (Nucleoporin Nup35) (35 kDa nucleoporin) (Mitotic phosphoprotein 44) (MP-44) [MASS=34774] | 0.00 | 4.91  | 0.57 | 0.00 | 1 | 1 | 2 | IFGESIM[147]IGVKPC[330]IDK                        | 1 |
| O10H3_HUMAN (O60404) Olfactory receptor 10H3 [MASS=35721]                                                                                                             | 0.00 | 3.16  | *    | *    | * | 1 | 3 | M[147]LADLLFTHR                                   | 1 |
| O13D1_HUMAN (Q8NGV5) Olfactory receptor 13D1 [MASS=35304]                                                                                                             | 0.00 | 8.92  | 0.44 | 0.00 | 1 | 1 | 3 | KAFSTC[330]SAHSIVILFYGSALFMYMKPK                  | 1 |
| O4A15_HUMAN (Q8NGL6) Olfactory receptor 4A15 (Olfactory receptor OR11-118) [MASS=35306]                                                                               | *    | 6.05  | *    | *    | * | 1 | 3 | NNVTEFILLGLTQNPEGQK                               | 1 |
| O51A4_HUMAN (Q8NGJ6) Olfactory receptor 51A4 [MASS=35256]                                                                                                             | 0.00 | 9.27  | 1.66 | 0.00 | 1 | 1 | 3 | HVSPLINVLMANVLLVPPLTNPIVYC[339]VK                 | 1 |
|                                                                                                                                                                       |      |       |      |      |   |   | 3 | RLVVQQAGQADAGEYSC[339]EAGGQR                      | 1 |
|                                                                                                                                                                       |      |       |      |      |   |   | 3 | PQDSC[330]RVTFFLAGDM[147]VTSAFITVRGWR             | 1 |
|                                                                                                                                                                       |      |       |      |      |   |   | 1 | EDSVRK                                            | 1 |
|                                                                                                                                                                       |      |       |      |      |   |   | 3 | TPLHANELNEIDAQPGGYHVLTLR                          | 1 |
| OBSCN_HUMAN (Q5VST9) Obscurin (Obscurin-myosin light chain kinase) (Obscurin-MLCK) (Obscurin-RhoGEF) [MASS=868479]                                                    | 0.00 | 2.18  | 1.16 | 0.00 | 1 | 9 | 3 | QDGAVC[330]ELQIC[339]GLAVADAGEYSC[339]VC[330]GEER | 1 |
|                                                                                                                                                                       |      |       |      |      |   |   | 3 | ERPAAIKPLEDQWVAPGEDVELR                           | 1 |
|                                                                                                                                                                       |      |       |      |      |   |   | 1 | VRVEELGEASALRIR                                   | 1 |
|                                                                                                                                                                       |      |       |      |      |   |   | 2 | HLPLDEPAELGLRER                                   | 1 |
|                                                                                                                                                                       |      |       |      |      |   |   | 2 | DDTPLSPSEKFK                                      | 1 |
|                                                                                                                                                                       |      |       |      |      |   |   | 3 | IC[330]RQVISQLPR                                  | 2 |
| OCRL_HUMAN (Q01968) Inositol polyphosphate 5-phosphatase OCRL-1 (EC 3.1.3.36) (Lowe oculocerebrorenal syndrome protein) [MASS=104204]                                 | 0.30 | 2.22  | 1.05 | 0.00 | 1 | 2 | 2 | C[339]LDSAYDPR                                    | 1 |
|                                                                                                                                                                       |      |       |      |      |   |   |   |                                                   |   |

|                                                                                                                                                                                                                                                                             |      |       |      |      |   |   |             |                                                                                           |             |
|-----------------------------------------------------------------------------------------------------------------------------------------------------------------------------------------------------------------------------------------------------------------------------|------|-------|------|------|---|---|-------------|-------------------------------------------------------------------------------------------|-------------|
| ODB2_HUMAN (P11182) Lipoamide acyltransferase component of branched-chain alpha-keto acid dehydrogenase complex, mitochondrial precursor (EC 2.3.1.168) (Dihydrolipoyllysine-residue (2-methylpropanoyl)transferase) (E2) (Dihydrolipoamide branched chain tra [MASS=53487] | 0.92 | 6.22  | 1.11 | 0.00 | 1 | 2 | 2           | NVQIC[339]SIFDIATELNR<br>PPVFTGKDKTEPIK                                                   | 1<br>1      |
| ODO1_HUMAN (Q02218) 2-oxoglutarate dehydrogenase E1 component, mitochondrial precursor (EC 1.2.4.2) (Alpha-ketoglutarate dehydrogenase) [MASS=113475]                                                                                                                       | 0.94 | 3.49  | 0.89 | 0.00 | 1 | 2 | 3<br>2      | VAAEWRSTFHKDVVVDLVC[339]YR<br>FGLEGC[339]EVLIPALK                                         | 1<br>1      |
| ODP2_HUMAN (P10515) Dihydrolipoyllysine-residue acetyltransferase component of pyruvate dehydrogenase complex, mitochondrial precursor (EC 2.3.1.12) (Pyruvate dehydrogenase complex E2 subunit) (PDCE2) (E2) (Dihydrolipoamide S-acetyltransferase component [MASS=65781]  | 1.00 | 10.75 | 0.93 | 0.12 | 3 | 3 | 2<br>3<br>2 | DVPLGTPLC[330]IIVEK<br>NFSAIINPPQAC[339]ILAIGASEDKLVPADNEK<br>DVPIGAIIC[330]ITVGKPEDIEAFK | 1<br>1<br>1 |
| ODPA_HUMAN (P08559) Pyruvate dehydrogenase E1 component alpha subunit, somatic form, mitochondrial precursor (EC 1.2.4.1) (PDHE1-A type I) [MASS=43295]                                                                                                                     | 0.00 | 1.54  | 0.88 | 0.00 | 1 | 1 | 2           | KC[330]DLHR                                                                               | 1           |
| ODPB_HUMAN (P11177) Pyruvate dehydrogenase E1 component subunit beta, mitochondrial precursor (EC 1.2.4.1) (PDHE1-B) [MASS=39219]                                                                                                                                           | *    | 3.62  | *    | *    | * | 1 | 2           | PMDMETIEASVMK                                                                             | 1           |
| ODPX_HUMAN (O00330) Pyruvate dehydrogenase protein X component, mitochondrial precursor (Dihydrolipoamide dehydrogenase-binding protein of pyruvate dehydrogenase complex) (Lipoyl-containing pyruvate dehydrogenase complex component X) (E3-binding protein) [MASS=54122] | 0.95 | 6.59  | 1.21 | 0.00 | 1 | 2 | 3<br>2      | HSLDASQGTATGPR<br>STVPHAYATADC[330]DLGAVLK                                                | 1<br>1      |

|                                                                                                                                                                             |      |       |      |      |   |   |   |                                      |   |
|-----------------------------------------------------------------------------------------------------------------------------------------------------------------------------|------|-------|------|------|---|---|---|--------------------------------------|---|
| OPA1_HUMAN (O60313) Dynamin-like 120 kDa protein, mitochondrial precursor (Optic atrophy 1 gene protein) [MASS=111657]                                                      | 1.00 | 2.71  | 1.20 | 0.03 | 3 | 2 | 3 | TQEQC[330]VHNETKNELEK                | 1 |
|                                                                                                                                                                             |      |       |      |      |   |   | 3 | TQEQC[339]VHNETKNELEK                | 1 |
|                                                                                                                                                                             |      |       |      |      |   |   | 2 | TALNHC[330]NLC[330]R                 | 1 |
| OR1B1_HUMAN (Q8NGR6) Olfactory receptor 1B1 (Olfactory receptor 9-B) (OR9-B) (Olfactory receptor OR9-26) [MASS=35161]                                                       | 0.00 | 5.99  | 2.52 | 0.00 | 1 | 1 | 3 | C[339]AC[339]LLALSWVVSILHTMLR        | 1 |
| OR1L3_HUMAN (Q8NH93) Olfactory receptor 1L3 (Olfactory receptor 9-D) (OR9-D) (Olfactory receptor OR9-28) [MASS=36633]                                                       | 0.45 | 4.94  | 2.97 | 0.00 | 1 | 1 | 2 | C[339]VAIC[339]NPFHYVTVM[147]NR      | 1 |
| OR5L2_HUMAN (Q8NGL0) Olfactory receptor 5L2 (HTPCRX16) [MASS=34682]                                                                                                         | 0.00 | 5.47  | 0.35 | 0.00 | 1 | 1 | 3 | FVAIC[330]NPLLYM[147]VTM[147]SQK     | 1 |
| ORC1_HUMAN (Q13415) Origin recognition complex subunit 1 (Replication control protein 1) [MASS=97349]                                                                       | *    | 2.44  | *    | *    | * | 1 | 3 | GSPQETTLLVDELDLLWTHK                 | 1 |
| OXPB_HUMAN (Q9Y4L1) 150 kDa oxygen-regulated protein precursor (Orp150) (Hypoxia up-regulated 1) [MASS=111335]                                                              | 0.00 | 2.40  | 1.26 | 0.00 | 1 | 2 | 2 | LC[330]QGLFFR                        | 1 |
|                                                                                                                                                                             |      |       |      |      |   |   | 2 | ENERFFGDSAASMAIK                     | 1 |
| OZF_HUMAN (Q15072) Zinc finger protein OZF (Only zinc finger protein) (Zinc finger protein 146) [MASS=33280]                                                                | *    | 6.16  | *    | *    | * | 1 | 3 | AFSQFSTLALHLRIHTGK                   | 1 |
| P2Y13_HUMAN (Q9BPV8) P2Y purinoceptor 13 (P2Y13) (G-protein coupled receptor 86) (G-protein coupled receptor 94) [MASS=38440]                                               | *    | 2.10  | *    | *    | * | 1 | 2 | VYDSYRK                              | 1 |
| P3H2_HUMAN (Q8IVL5) Prolyl 3-hydroxylase 2 precursor (EC 1.14.11.7) (Leprecan-like protein 1) (Myxoid liposarcoma-associated protein 4) [MASS=80984]                        | 0.00 | 1.84  | 0.41 | 0.00 | 1 | 1 | 2 | SC[330]ETQRLGGPASR                   | 1 |
| PAIP1_HUMAN (Q9H074) Polyadenylate-binding protein-interacting protein 1 (Poly(A)-binding protein-interacting protein 1) (PABP-interacting protein 1) (PAIP-1) [MASS=53524] | 0.00 | 10.23 | 1.86 | 0.00 | 1 | 3 | 3 | ELLNALFSNPM[147]DDNLIC[339]AVK       | 1 |
|                                                                                                                                                                             |      |       |      |      |   |   | 1 | APGAGRGR                             | 1 |
|                                                                                                                                                                             |      |       |      |      |   |   | 3 | M[147]DM[147]EEIIQRIENVVLDANC[330]SR | 1 |
| PANK4_HUMAN (Q9NVE7) Pantothenate kinase 4 (EC 2.7.1.33) (Pantothenic acid kinase 4) (hPanK4) [MASS=85990]                                                                  | *    | 2.07  | *    | *    | * | 1 | 2 | AVHTNYHAALRC[339]ESLK                | 1 |



|                                                                                                                                                                                                  |      |       |      |      |   |   |   |                                      |   |
|--------------------------------------------------------------------------------------------------------------------------------------------------------------------------------------------------|------|-------|------|------|---|---|---|--------------------------------------|---|
| PARK7_HUMAN (Q99497) Protein DJ-1<br>(Oncogene DJ1) [MASS=19891]                                                                                                                                 | 1.00 | 32.28 | 0.88 | 0.05 | 3 | 4 | 1 | ALVILAK                              | 1 |
|                                                                                                                                                                                                  |      |       |      |      |   |   | 2 | VTVAGLAGKDPVQC[330]SR                | 1 |
|                                                                                                                                                                                                  |      |       |      |      |   |   | 2 | DVVIC[339]PDASLEDAKK                 | 1 |
|                                                                                                                                                                                                  |      |       |      |      |   |   | 2 | GLIAAIC[330]AGPTALLAHEIGFGSK         | 1 |
| PAX9_HUMAN (P55771) Paired box protein<br>Pax-9 [MASS=36310]                                                                                                                                     | *    | 5.28  | *    | *    | * | 1 | 2 | VPTPPGVPAIPGSVAM[147]PR              | 1 |
| PCD10_HUMAN (Q9P2E7) Protocadherin-10<br>precursor [MASS=112935]                                                                                                                                 | 0.00 | 1.63  | 2.65 | 0.00 | 1 | 1 | 3 | AQSAGM[147]DLFSNC[339]TEEC[339]JK    | 1 |
| PCD15_HUMAN (Q96QU1) Protocadherin-15<br>precursor [MASS=216027]                                                                                                                                 | *    | 3.32  | *    | *    | * | 3 | 3 | SEPNVISSPAEC[339]SLELSPSR            | 1 |
|                                                                                                                                                                                                  |      |       |      |      |   |   | 3 | QM[147]LFLNSTGRVLDR                  | 1 |
|                                                                                                                                                                                                  |      |       |      |      |   |   | 3 | LVVVAFDDGEPVM[147]SSSATVKILVLHPGEIPR | 1 |
| PCDAC_HUMAN (Q9UN75) Protocadherin<br>alpha 12 precursor (PCDH-alpha12)<br>[MASS=101651]                                                                                                         | 0.38 | 2.66  | 1.42 | 0.00 | 1 | 1 | 3 | QRVC[339]SAESPPKTDLM[147]AFSPSLQLSR  | 1 |
| PCOC2_HUMAN (Q9UKZ9) Procollagen C-<br>endopeptidase enhancer 2 precursor<br>(Procollagen COOH-terminal proteinase<br>enhancer 2) (Procollagen C-proteinase<br>enhancer 2) (PCPE-2) [MASS=45716] | *    | 6.75  | *    | *    | * | 1 | 2 | MMVQMISDANTAGNGFMAMFSAEPNER          | 1 |
| PDCD8_HUMAN (O95831) Programmed cell<br>death protein 8, mitochondrial precursor (EC 1.-<br>.-) (Apoptosis-inducing factor) [MASS=66900]                                                         | 0.00 | 4.73  | 1.51 | 0.00 | 1 | 2 | 3 | SNIWVAGDAAC[339]FYDIKLGR             | 1 |
|                                                                                                                                                                                                  |      |       |      |      |   |   | 2 | C[339]LIATGGTPR                      | 1 |
| PDIA5_HUMAN (Q14554) Protein disulfide-<br>isomerase A5 precursor (EC 5.3.4.1) (Protein<br>disulfide isomerase-related protein)<br>[MASS=59594]                                                  | 0.21 | 1.93  | 0.18 | 0.57 | 2 | 1 | 2 | GFPTIC[330]YFEK                      | 2 |
| PDZK3_HUMAN (O15018) PDZ domain-<br>containing protein 3 (PDZ domain-containing<br>protein 2) (Activated in prostate cancer protein)<br>[MASS=301609]                                            | 0.00 | 3.17  | 0.73 | 0.00 | 1 | 6 | 3 | LQELRALSMPDLKLC[339]SEDYSAGPSAVLFK   | 1 |
|                                                                                                                                                                                                  |      |       |      |      |   |   | 3 | NGESVLENLHISESQDLLDLLQK              | 1 |
|                                                                                                                                                                                                  |      |       |      |      |   |   | 1 | SFSMAK                               | 1 |
|                                                                                                                                                                                                  |      |       |      |      |   |   | 2 | HNQGTHLR                             | 1 |
|                                                                                                                                                                                                  |      |       |      |      |   |   | 1 | EPGKPR                               | 1 |
|                                                                                                                                                                                                  |      |       |      |      |   |   | 2 | LVSPSLTPC[339]STPTHM[147]SR          | 1 |
| PGK1_HUMAN (P00558) Phosphoglycerate<br>kinase 1 (EC 2.7.2.3) (Primer recognition<br>protein 2) (PRP 2) [MASS=44483]                                                                             | 0.99 | 4.09  | 0.83 | 0.00 | 1 | 1 | 2 | AC[330]ANPAAGSVILLENLR               | 1 |
| PHAR1_HUMAN (Q9C0D0) Phosphatase and<br>actin regulator 1 [MASS=66308]                                                                                                                           | 0.00 | 3.62  | 0.66 | 0.00 | 1 | 1 | 3 | VMIC[330]MPVGGPDLVSVYTAQK            | 1 |

|                                                                                                                                                                                                                                |      |      |      |      |   |   |   |                         |   |
|--------------------------------------------------------------------------------------------------------------------------------------------------------------------------------------------------------------------------------|------|------|------|------|---|---|---|-------------------------|---|
| PHEX_HUMAN (P78562) Phosphate-regulating neutral endopeptidase (EC 3.4.24.-) (Metalloendopeptidase homolog PEX) (X-linked hypophosphatemia protein) (HYP) (Vitamin D-resistant hypophosphatemic rickets protein) [MASS=86473]  | 0.00 | 3.07 | 0.97 | 0.00 | 1 | 2 | 1 | C[330]NSYRPEAAR         | 1 |
|                                                                                                                                                                                                                                |      |      |      |      |   |   | 2 | C[330]M[147]INQYSNYYWKK | 1 |
| PHF8_HUMAN (Q9UPP1) PHD finger protein 8 [MASS=117863]                                                                                                                                                                         | *    | 1.23 | *    | *    | * | 1 | 2 | VTPTLPKQDRPVR           | 1 |
| PHLD1_HUMAN (P80108) Phosphatidylinositol-glycan-specific phospholipase D 1 precursor (EC 3.1.4.50) (PI-G PLD) (Glycoprotein phospholipase D) (Glycosyl-phosphatidylinositol-specific phospholipase D) [MASS=92374]            | 0.41 | 1.79 | 1.39 | 0.00 | 1 | 1 | 2 | LWPGLLIMLGSLC[339]HR    | 1 |
| PI51C_HUMAN (O60331) Phosphatidylinositol-4-phosphate 5-kinase type-1 gamma (EC 2.7.1.68) (Phosphatidylinositol-4-phosphate 5-kinase type I gamma) (PtdIns(4)P-5-kinase gamma) (PtdInsPKIgamma) (PIP5KIgamma) [MASS=73259]     | *    | 2.99 | *    | *    | * | 1 | 3 | KLEHTWKALVHDGDTVSVHR    | 1 |
| PITM2_HUMAN (Q9BZ72) Membrane-associated phosphatidylinositol transfer protein 2 (Phosphatidylinositol transfer protein, membrane-associated 2) (Pyk2 N-terminal domain-interacting receptor 3) (NIR-3) [MASS=148932]          | *    | 1.41 | *    | *    | * | 1 | 2 | VSYTIPESHRLGVGVYPIK     | 1 |
| PK1L1_HUMAN (Q8TDX9) Polycystic kidney disease 1-like 1 protein (Polycystin-1L1) [MASS=315433]                                                                                                                                 | *    | 0.56 | *    | *    | * | 1 | 2 | QPASAILSGSGRAQRK        | 1 |
| PK3CG_HUMAN (P48736) Phosphatidylinositol-4,5-bisphosphate 3-kinase catalytic subunit gamma isoform (EC 2.7.1.153) (PI3-kinase p110 subunit gamma) (PtdIns-3-kinase subunit p110) (PI3K) (PI3Kgamma) (p120-PI3K) [MASS=126453] | *    | 1.27 | *    | *    | * | 1 | 2 | YQVVQTLDC[330]LRYWK     | 1 |

|                                                                                                                                                                                                                |      |      |      |      |   |   |   |                                           |   |
|----------------------------------------------------------------------------------------------------------------------------------------------------------------------------------------------------------------|------|------|------|------|---|---|---|-------------------------------------------|---|
| PLCG2_HUMAN (P16885) 1-phosphatidylinositol-4,5-bisphosphate phosphodiesterase gamma 2 (EC 3.1.4.11) (Phosphoinositide phospholipase C) (PLC-gamma-2) (Phospholipase C-gamma-2) (PLC-IV) [MASS=147936]         | 0.00 | 5.93 | 0.48 | 0.00 | 1 | 4 | 3 | QIIEDNPLGSLC[330]RGILDNLNTYNNVVKAPQGK     | 1 |
|                                                                                                                                                                                                                |      |      |      |      |   |   | 1 | RNSISLR                                   | 1 |
|                                                                                                                                                                                                                |      |      |      |      |   |   | 3 | YYLTDNLTFSSYALIQHRETHLR                   | 1 |
|                                                                                                                                                                                                                |      |      |      |      |   |   | 3 | PDASAVYLRDFQR                             | 4 |
| PLXA2_HUMAN (O75051) Plexin-A2 precursor (Semaphorin receptor OCT) [MASS=212654]                                                                                                                               | 0.00 | 2.30 | 0.75 | 0.00 | 1 | 2 | 2 | C[339]SNPQITEILTVSGPPEGGTR                | 1 |
|                                                                                                                                                                                                                |      |      |      |      |   |   | 3 | DWTFNHLTVHQGTGAVYVGINR                    | 1 |
| PLXB2_HUMAN (O15031) Plexin-B2 precursor (MM1) [MASS=205098]                                                                                                                                                   | 0.00 | 1.20 | 0.54 | 0.00 | 1 | 2 | 2 | SDC[330]SLC[330]RAANPDYR                  | 1 |
|                                                                                                                                                                                                                |      |      |      |      |   |   | 3 | TLLARMC[339]R                             | 1 |
| PLXD1_HUMAN (Q9Y4D7) Plexin-D1 precursor [MASS=212094]                                                                                                                                                         | *    | 1.56 | *    | *    | * | 2 | 1 | AGALEIQRR                                 | 1 |
|                                                                                                                                                                                                                |      |      |      |      |   |   | 3 | DLDTEKYFHLVLPDELAEPK                      | 1 |
| PP1A_HUMAN (P62136) Serine/threonine-protein phosphatase PP1-alpha catalytic subunit (EC 3.1.3.16) (PP-1A) [MASS=37512]                                                                                        | *    | 4.55 | *    | *    | * | 1 | 2 | GKQSLETIC[339]LLLAYK                      | 1 |
| PPIA_HUMAN (P62937) Peptidyl-prolyl cis-trans isomerase A (EC 5.2.1.8) (PPIase A) (Rotamase A) (Cyclophilin A) (Cyclosporin A-binding protein) [MASS=17881]                                                    | 1.00 | 6.71 | 1.20 | 0.00 | 1 | 1 | 1 | KITIADC[339]GQLE                          | 1 |
| PPWD1_HUMAN (Q96BP3) Peptidylprolyl isomerase domain and WD repeat-containing protein 1 (EC 5.2.1.8) [MASS=73574]                                                                                              | *    | 2.32 | *    | *    | * | 1 | 2 | WVGPLPVEATLAKKR                           | 1 |
| PRD11_HUMAN (Q9NQV5) PR domain-containing protein 11 [MASS=57033]                                                                                                                                              | *    | 4.17 | *    | *    | * | 1 | 3 | M[147]LKMAEPIASLM[147]IVEC[339]RAC[339]LR | 1 |
| PRDX3_HUMAN (P30048) Thioredoxin-dependent peroxide reductase, mitochondrial precursor (EC 1.11.1.15) (Peroxiredoxin-3) (PRX III) (Antioxidant protein 1) (AOP-1) (Protein MER5 homolog) (HBC189) [MASS=27692] | 0.99 | 9.77 | 1.20 | 0.00 | 1 | 1 | 2 | YLVLFYPLDFTFVC[339]PTEIVAFSDK             | 1 |

|                                                                                                                                                                                                                                                                             |      |      |      |      |   |   |   |                               |   |
|-----------------------------------------------------------------------------------------------------------------------------------------------------------------------------------------------------------------------------------------------------------------------------|------|------|------|------|---|---|---|-------------------------------|---|
| PRDX5_HUMAN (P30044) Peroxiredoxin-5, mitochondrial precursor (EC 1.11.1.15) (Prx-V) (Peroxisomal antioxidant enzyme) (PLP) (Thioredoxin reductase) (Thioredoxin peroxidase PMP20) (Antioxidant enzyme B166) (AOEB166) (TPx type VI) (Liver tissue 2D-page spo [MASS=22026] | 1.00 | 7.48 | 1.44 | 0.00 | 2 | 1 | 2 | GVLFVPGAFTPGC[339]SK          | 1 |
|                                                                                                                                                                                                                                                                             |      |      |      |      |   |   | 2 | GVLFVPGAFTPGC[330]SK          | 1 |
| PREX1_HUMAN (Q8TCU6) Phosphatidylinositol 3,4,5-trisphosphate-dependent Rac exchanger 1 protein (P-Rex1 protein) [MASS=186203]                                                                                                                                              | 0.00 | 3.32 | 1.19 | 0.08 | 2 | 3 | 3 | KWLEQVAATGVLLHC[339]QSLSPATVK | 1 |
|                                                                                                                                                                                                                                                                             |      |      |      |      |   |   | 2 | C[330]IMQATDIMR               | 1 |
|                                                                                                                                                                                                                                                                             |      |      |      |      |   |   | 2 | DAYVMIAEKGEKLYHMM[147]MNK     | 1 |
| PRIC1_HUMAN (Q96MT3) Prickle-like protein 1 (REST/NRSF-interacting LIM domain protein 1) [MASS=94300]                                                                                                                                                                       | 0.00 | 2.65 | 0.94 | 0.00 | 1 | 1 | 2 | TC[330]SLGEDVHASDSSDSAFQSAR   | 1 |
| PSL2_HUMAN (Q8TCT8) Signal peptide peptidase-like 2A (EC 3.4.23.-) (Protein SPP-like 2A) (Protein SPPL2a) (Intramembrane protease 3) (IMP3) (Presenilin-like protein 2) [MASS=58143]                                                                                        | 0.00 | 4.42 | 0.43 | 0.00 | 1 | 1 | 3 | KGQPALLYLVPC[330]TLITASVVAWR  | 1 |
| PTPS_HUMAN (Q03393) 6-pyruvoyl tetrahydrobiopterin synthase (EC 4.2.3.12) (PTPS) (PTP synthase) [MASS=16386]                                                                                                                                                                | 0.00 | 8.28 | 1.38 | 0.00 | 1 | 1 | 2 | C[339]NPNNGHGHNYK             | 1 |
| PUR4_HUMAN (O15067) Phosphoribosylformylglycinamide synthase (EC 6.3.5.3) (FGAM synthase) (FGAMS) (Formylglycinamide ribotide amidotransferase) (FGARAT) (Formylglycinamide ribotide synthetase) [MASS=144663]                                                              | 0.00 | 2.02 | 0.25 | 0.00 | 2 | 2 | 3 | RIVLVDDREC[330]PVR            | 2 |
|                                                                                                                                                                                                                                                                             |      |      |      |      |   |   | 2 | FC[330]DNSSAIQGKEVR           | 1 |
| PYC_HUMAN (P11498) Pyruvate carboxylase, mitochondrial precursor (EC 6.4.1.1) (Pyruvic carboxylase) (PCB) [MASS=129633]                                                                                                                                                     | 0.98 | 0.76 | 1.43 | 0.00 | 1 | 1 | 1 | AGTHILC[339]IK                | 1 |
| QOR_HUMAN (Q08257) Quinone oxidoreductase (EC 1.6.5.5) (NADPH:quinone reductase) (Zeta-crystallin) [MASS=35206]                                                                                                                                                             | 0.97 | 2.74 | 1.10 | 0.00 | 1 | 1 | 1 | ALIHSAC[330]VK                | 1 |

|                                                                                                                                                                                                             |      |      |      |      |   |   |   |                                       |   |
|-------------------------------------------------------------------------------------------------------------------------------------------------------------------------------------------------------------|------|------|------|------|---|---|---|---------------------------------------|---|
| RB3GP_HUMAN (Q15042) Rab3 GTPase-activating protein catalytic subunit (RAB3 GTPase-activating protein 130 kDa subunit) (Rab3-GAP p130) (Rab3-GAP) [MASS=110392]                                             | 0.84 | 3.88 | 1.03 | 0.00 | 1 | 2 | 3 | KAENPQC[339]LLGDFVTEFFKIC[339]R       | 1 |
|                                                                                                                                                                                                             |      |      |      |      |   |   | 2 | AENPQC[330]LLGDFVTEFFK                | 1 |
| RBCC1_HUMAN (Q8TDY2) RB1-inducible coiled-coil protein 1 [MASS=183060]                                                                                                                                      | 0.00 | 1.38 | 0.06 | 0.00 | 1 | 1 | 2 | DQKLEMENIM[147]HSQNC[330]EIKELK       | 1 |
| RBP22_HUMAN (Q53T03) Ran-binding protein 2-like 2 (RanBP2L2) [MASS=198922]                                                                                                                                  | *    | 1.13 | *    | *    | * | 1 | 2 | FDESTTGSNFSFKSALSLSK                  | 1 |
| RBPSL_HUMAN (Q9UBG7) Recombining binding protein suppressor of hairless-like protein (Transcription factor RBP-L) [MASS=56594]                                                                              | 0.00 | 2.91 | 0.53 | 0.00 | 1 | 1 | 3 | EFGC[330]AKTLYISDADK                  | 1 |
| RDH1_HUMAN (Q92781) 11-cis retinol dehydrogenase (EC 1.1.1.105) (11-cis RDH) [MASS=34979]                                                                                                                   | 0.00 | 7.55 | 1.62 | 0.00 | 1 | 1 | 2 | GRVINITSVLGRLAANGGGYC[339]VSK         | 1 |
| RED2_HUMAN (Q9NS39) Double-stranded RNA-specific editase B2 (EC 3.5.-.-) (dsRNA adenosine deaminase B2) (RNA-dependent adenosine deaminase 3) (RNA-editing deaminase 2) (RNA-editing enzyme 2) [MASS=80621] | *    | 0.95 | *    | *    | * | 1 | 2 | LKEGGYR                               | 1 |
| REXO1_HUMAN (Q8N1G1) RNA exonuclease 1 homolog (EC 3.1.-.-) (Elongin A-binding protein 1) (EloA-BP1) (Transcription elongation factor B polypeptide 3-binding protein 1) [MASS=131529]                      | *    | 0.57 | *    | *    | * | 1 | 2 | PKDSSC[339]R                          | 3 |
| RFC4_HUMAN (P35249) Replication factor C subunit 4 (Replication factor C 37 kDa subunit) (RF-C 37 kDa subunit) (RFC37) (Activator 1 37 kDa subunit) (A1 37 kDa subunit) [MASS=39681]                        | 0.00 | 7.71 | 0.50 | 0.00 | 1 | 2 | 2 | IDGVFAAC[330]QSGSFDK                  | 1 |
|                                                                                                                                                                                                             |      |      |      |      |   |   | 2 | IIEPLTSRC[339]SKFR                    | 1 |
| RFC5_HUMAN (P40937) Replication factor C subunit 5 (Replication factor C 36 kDa subunit) (RF-C 36 kDa subunit) (RFC36) (Activator 1 36 kDa subunit) (A1 36 kDa subunit) [MASS=38496]                        | 0.00 | 5.59 | *    | *    | * | 1 | 2 | LVILDEADAM[147]TQDAQNALR              | 1 |
| RGS12_HUMAN (O14924) Regulator of G-protein signaling 12 (RGS12) [MASS=156356]                                                                                                                              | 0.00 | 2.21 | 0.29 | 0.00 | 1 | 1 | 3 | AERVVEEMQSGGIFNMIFENPSLC[330]ASNSEPLK | 1 |

|                                                                                                                                                                   |      |       |      |      |   |   |                  |                                                                                                                                |                  |
|-------------------------------------------------------------------------------------------------------------------------------------------------------------------|------|-------|------|------|---|---|------------------|--------------------------------------------------------------------------------------------------------------------------------|------------------|
| RGS19_HUMAN (P49795) Regulator of G-protein signaling 19 (RGS19) (G-alpha-interacting protein) (GAIP protein) [MASS=24636]                                        | *    | 10.14 | *    | *    | * | 1 | 3                | MQEPSAHTFDDAQLQIYTLM[147]HR                                                                                                    | 1                |
| RHOA_HUMAN (P61586) Transforming protein RhoA precursor (H12) [MASS=21768]                                                                                        | 0.98 | 7.25  | 1.09 | 0.00 | 1 | 1 | 2                | HFC[339]PNVPIILVGNK                                                                                                            | 1                |
| RHOB_HUMAN (P62745) Rho-related GTP-binding protein RhoB precursor (H6) [MASS=22123]                                                                              | 0.99 | 7.14  | 0.93 | 0.00 | 1 | 1 | 2                | HFC[339]PNVPIILVANK                                                                                                            | 1                |
| RIB1_HUMAN (P04843) Dolichyl-diphosphooligosaccharide--protein glycosyltransferase 67 kDa subunit precursor (EC 2.4.1.119) (Ribophorin I) (RPN-I) [MASS=68569]    | 0.00 | 8.90  | *    | *    | * | 2 | 3<br>2           | MEAPAAGLFLLLLGTWAPAGSASSEAPPLINEDVK<br>VSEM[147]QKLDQVKELVLK                                                                   | 1<br>1           |
| RIPK5_HUMAN (Q6XUX3) Receptor-interacting serine/threonine-protein kinase 5 (EC 2.7.11.1) (Dusty protein kinase) (Dusty PK) (RIP-homologous kinase) [MASS=105258] | *    | 2.91  | *    | *    | * | 1 | 2                | DLYTGLKAGLTLETRLQIALDVVEGIR                                                                                                    | 1                |
| RL10A_HUMAN (P62906) 60S ribosomal protein L10a (CSA-19) [MASS=24700]                                                                                             | 0.00 | 7.41  | 0.34 | 0.00 | 1 | 1 | 3                | FSVC[330]VLGDQQHC[330]DEAK                                                                                                     | 1                |
| RNP6_HUMAN (O60518) Ran-binding protein 6 (RanBP6) [MASS=124713]                                                                                                  | *    | 0.72  | *    | *    | * | 1 | 2                | LETHASM[147]R                                                                                                                  | 2                |
| RNF31_HUMAN (Q96EP0) RING finger protein 31 (Zinc in-between-RING-finger ubiquitin-associated domain protein) [MASS=119651]                                       | 0.00 | 2.33  | 1.95 | 0.00 | 1 | 1 | 3                | RM[147]NDPEYQAQGLAM[147]YLQENGIDC[330]PK                                                                                       | 1                |
| RNF37_HUMAN (O94941) RING finger protein 37 (Ubiquitin-conjugating enzyme 7-interacting protein 5) (U-box domain-containing protein 5) [MASS=58965]               | 0.00 | 9.24  | 1.11 | 0.00 | 1 | 2 | 3<br>2           | LAEIQDVPEEFLDPITLEIMPC[339]PM[147]LLPSGK<br>LTRGQLQHLGTRGSNTSWR                                                                | 1<br>1           |
| RORA_HUMAN (P35398) Nuclear receptor ROR-alpha (Nuclear receptor RZR-alpha) [MASS=63035]                                                                          | 0.00 | 5.04  | 1.07 | 0.00 | 1 | 1 | 3                | RIDGFM[147]ELC[339]QNDQIVLLKAGSLEVVFIR                                                                                         | 1                |
| RPC1_HUMAN (O14802) DNA-directed RNA polymerase III largest subunit (EC 2.7.7.6) (RPC155) (RPC1) [MASS=155748]                                                    | *    | 6.04  | *    | *    | * | 4 | 3<br>3<br>2<br>3 | AQM[147]EPGSAVGALC[330]AQSIGEPGTQM[147]TLK<br>ETDVAKKTSHIC[339]FGM[147]K<br>EVEPLLGR<br>GEDLC[330]ANDSYVTIQNSELMMSGMDKGTLGSGSK | 1<br>1<br>1<br>1 |
| RPP29_HUMAN (O95707) Ribonuclease P protein subunit p29 (EC 3.1.26.5) (hPOP4) [MASS=25425]                                                                        | *    | 7.27  | *    | *    | * | 1 | 2                | STPRM[147]SPQAREDQLQR                                                                                                          | 1                |

|                                                                                                                                                                                                                                                                              |      |       |      |      |   |   |   |                                              |   |
|------------------------------------------------------------------------------------------------------------------------------------------------------------------------------------------------------------------------------------------------------------------------------|------|-------|------|------|---|---|---|----------------------------------------------|---|
| RSMB_HUMAN (P14678) Small nuclear ribonucleoprotein-associated proteins B and B' (snRNP-B) (Sm protein B/B') (Sm-B/Sm-B') (SmB/SmB') [MASS=24610]                                                                                                                            | 0.00 | 18.75 | *    | *    | * | 2 | 3 | GAPPPGM[147]M[147]GPPPGMRPPMGPPMGIPPGR       | 1 |
|                                                                                                                                                                                                                                                                              |      |       |      |      |   |   | 2 | AFDKHM[147]NLILC[339]DC[339]DEFR             | 1 |
| RSMN_HUMAN (P63162) Small nuclear ribonucleoprotein-associated protein N (snRNP-N) (Sm protein N) (Sm-N) (SmN) (Sm-D) (Tissue-specific-splicing protein) [MASS=24614]                                                                                                        | 0.00 | 12.50 | 3.60 | 0.00 | 1 | 2 | 2 | ATPPPGIMAPPPGMR                              | 1 |
|                                                                                                                                                                                                                                                                              |      |       |      |      |   |   | 2 | PPPPGIRGPPPPGMR                              | 2 |
| RT32_HUMAN (Q9Y6G3) Mitochondrial 28S ribosomal protein S32 (S32mt) (MRP-S32) [MASS=16661]                                                                                                                                                                                   | 0.00 | 14.08 | 0.73 | 0.00 | 1 | 1 | 3 | TILKHLFPVQNGALYC[330]VC[330]HK               | 1 |
| RTEL1_HUMAN (Q9NZ71) Regulator of telomere elongation helicase 1 (EC 3.6.1.-) (Helicase-like protein NHL) [MASS=152373]                                                                                                                                                      | 0.00 | 2.21  | 0.47 | 0.00 | 1 | 2 | 3 | KIAERAQGELFPDR                               | 2 |
|                                                                                                                                                                                                                                                                              |      |       |      |      |   |   | 3 | VIRHRQDYGAVFLC[330]DHR                       | 1 |
| RTN1_HUMAN (Q16799) Reticulon-1 (Neuroendocrine-specific protein) [MASS=83617]                                                                                                                                                                                               | 0.00 | 1.80  | 0.63 | 0.00 | 1 | 1 | 2 | YTDC[330]LQFYVNSTLK                          | 1 |
| RUNX1_HUMAN (Q01196) Runt-related transcription factor 1 (Core-binding factor, alpha 2 subunit) (CBF-alpha 2) (Acute myeloid leukemia 1 protein) (Oncogene AML-1) (Polyomavirus enhancer-binding protein 2 alpha B subunit) (PEBP2-alpha B) (PEA2-alpha B) (SL [MASS=48796]) | *    | 7.73  | *    | *    | * | 1 | 3 | VVALGDVPDGLVTVM[147]AGNDENYSAELRNATAAM[147]K | 1 |
| S10AB_HUMAN (P31949) Protein S100-A11 (S100 calcium-binding protein A11) (Protein S100C) (Calgizzarin) (MLN 70) [MASS=11740]                                                                                                                                                 | 1.00 | 30.48 | 1.19 | 0.01 | 3 | 1 | 3 | KLDTNSDGQLDFSEFLNLIGGLAMAC[330]HDSFLK        | 1 |
|                                                                                                                                                                                                                                                                              |      |       |      |      |   |   | 3 | KLDTNSDGQLDFSEFLNLIGGLAMAC[339]HDSFLK        | 1 |
|                                                                                                                                                                                                                                                                              |      |       |      |      |   |   | 3 | KLDTNSDGQLDFSEFLNLIGGLAM[147]AC[339]HDSFLK   | 1 |
| SACS_HUMAN (Q9NZJ4) Sacsin [MASS=436973]                                                                                                                                                                                                                                     | 0.00 | 0.91  | 0.65 | 0.00 | 1 | 3 | 3 | SIPPLFSGRESHKTSSK                            | 1 |
|                                                                                                                                                                                                                                                                              |      |       |      |      |   |   | 2 | LGFEAGC[339]K                                | 1 |
|                                                                                                                                                                                                                                                                              |      |       |      |      |   |   | 2 | SDHVAAC[330]LR                               | 1 |
| SAM50_HUMAN (Q9Y512) Sorting and assembly machinery component 50 homolog [MASS=51962]                                                                                                                                                                                        | 1.00 | 6.82  | 1.29 | 0.01 | 2 | 2 | 3 | THFFLNAGNLC[339]NLNYGEGPK                    | 1 |
|                                                                                                                                                                                                                                                                              |      |       |      |      |   |   | 2 | IC[339]JGVQFGAGIR                            | 1 |
| SAMH1_HUMAN (Q9Y3Z3) SAM domain and HD domain-containing protein 1 (Dendritic cell-derived IFNG-induced protein) (DCIP) (Monocyte protein 5) (MOP-5) [MASS=72200]                                                                                                            | *    | 2.24  | *    | *    | * | 1 | 2 | EVASAKPKVLLDVK                               | 1 |

|                                                                                                                                                                                                                                                                             |      |       |      |      |   |   |   |                                             |   |
|-----------------------------------------------------------------------------------------------------------------------------------------------------------------------------------------------------------------------------------------------------------------------------|------|-------|------|------|---|---|---|---------------------------------------------|---|
| SAP_HUMAN (P07602) Proactivator polypeptide precursor [Contains: Saposin A (Protein A); Saposin B-Val; Saposin B (Sphingolipid activator protein 1) (SAP-1) (Cerebroside sulfate activator) (CSAct) (Dispersin) (Sulfatide/GM1 activator); Saposin C (Co-beta- [MASS=58112] | 1.00 | 11.45 | 1.14 | 0.02 | 7 | 3 | 1 | GC[339]SFLPDPYQK                            | 1 |
|                                                                                                                                                                                                                                                                             |      |       |      |      |   |   | 3 | QC[339]DQFVAEYEPVLEILVEVM[147]DPSFVC[339]LK | 2 |
|                                                                                                                                                                                                                                                                             |      |       |      |      |   |   | 2 | GC[339]SFLPDPYQK                            | 1 |
| (Saposin B (Sphingolipid activator protein 1) (SAP-1) (Cerebroside sulfate activator) (CSAct) (Dispersin) (Sulfatide/GM1 activator); Saposin C (Co-beta- [MASS=58112]                                                                                                       | 1.00 | 11.45 | 1.14 | 0.02 | 7 | 3 | 3 | KHEVPAKSDVYC[330]EVC[330]EFLVK              | 1 |
|                                                                                                                                                                                                                                                                             |      |       |      |      |   |   | 2 | GC[330]SFLPDPYQK                            | 3 |
|                                                                                                                                                                                                                                                                             |      |       |      |      |   |   |   |                                             |   |
| SAR1A_HUMAN (Q9NR31) GTP-binding protein SAR1a (COPII-associated small GTPase) [MASS=22367]                                                                                                                                                                                 | *    | 9.09  | *    | *    | * | 1 | 2 | EIFGLYGQTTGKGNVTLK                          | 1 |
| SATT_HUMAN (P43007) Neutral amino acid transporter A (SATT) (Alanine/serine/cysteine/threonine transporter) (ASCT1) [MASS=55723]                                                                                                                                            | *    | 5.83  | *    | *    | * | 1 | 3 | FFNSLNEATMVLVSWIMWYVPVGIMFLVGSK             | 1 |
| SCNND_HUMAN (P51172) Amiloride-sensitive sodium channel subunit delta (Epithelial Na+ channel subunit delta) (Delta ENaC) (Nonvoltage-gated sodium channel 1 subunit delta) (SCNED) (Delta NaCH) [MASS=70274]                                                               | *    | 1.41  | *    | *    | * | 1 | 1 | AALSATVPR                                   | 1 |
| SCOT_HUMAN (P55809) Succinyl-CoA:3-ketoacid-coenzyme A transferase 1, mitochondrial precursor (EC 2.8.3.5) (Somatic-type succinyl CoA:3-oxoacid CoA-transferase) (Scot-S) [MASS=56157]                                                                                      | 1.00 | 9.04  | 1.11 | 0.10 | 5 | 3 | 3 | DIPDGATVLVGGFGLC[339]GIPENLIDALLK           | 1 |
|                                                                                                                                                                                                                                                                             |      |       |      |      |   |   | 2 | STGC[339]DFAVSPK                            | 1 |
|                                                                                                                                                                                                                                                                             |      |       |      |      |   |   | 2 | C[330]TLPLTGK                               | 1 |
|                                                                                                                                                                                                                                                                             |      |       |      |      |   |   | 1 | C[330]TLPLTGK                               | 1 |
|                                                                                                                                                                                                                                                                             |      |       |      |      |   |   | 2 | DIPDGATVLVGGFGLC[339]GIPENLIDALLK           | 1 |
| SCRN1_HUMAN (Q12765) Secernin-1 [MASS=46382]                                                                                                                                                                                                                                | *    | 4.83  | *    | *    | * | 1 | 2 | DSLEKQEESITVQTM[147]M[147]NTLR              | 1 |
| SEM3A_HUMAN (Q14563) Semaphorin-3A precursor (Semaphorin III) (Sema III) [MASS=88889]                                                                                                                                                                                       | 0.00 | 3.37  | 0.97 | 0.00 | 1 | 2 | 2 | GSAVC[339]M[147]YSM[147]SDVR                | 1 |
|                                                                                                                                                                                                                                                                             |      |       |      |      |   |   | 2 | DPYC[330]AWDGSAC[330]SR                     | 1 |
| SEM3D_HUMAN (O95025) Semaphorin-3D precursor [MASS=89651]                                                                                                                                                                                                                   | 0.00 | 1.54  | 0.08 | 0.00 | 1 | 1 | 3 | IPYPRPGTC[330]PSK                           | 1 |
| SEPT5_HUMAN (Q99719) Septin-5 (Peanut-like protein 1) (Cell division control-related protein 1) (CDCrel-1) [MASS=42777]                                                                                                                                                     | 0.95 | 2.71  | 0.97 | 0.00 | 1 | 1 | 2 | AHC[339]IQQM[147]TSK                        | 1 |
| SEPT7_HUMAN (Q16181) Septin-7 (CDC10 protein homolog) [MASS=50680]                                                                                                                                                                                                          | 1.00 | 3.20  | 0.93 | 0.04 | 2 | 1 | 2 | ADTLTPEEC[330]QQFKK                         | 1 |
|                                                                                                                                                                                                                                                                             |      |       |      |      |   |   | 2 | ADTLTPEEC[339]QQFKK                         | 1 |



|                                                                                                                                                                                                                                                                              |      |       |      |      |   |   |        |                                                                        |        |
|------------------------------------------------------------------------------------------------------------------------------------------------------------------------------------------------------------------------------------------------------------------------------|------|-------|------|------|---|---|--------|------------------------------------------------------------------------|--------|
| SERA_HUMAN (O43175) D-3-phosphoglycerate dehydrogenase (EC 1.1.1.95) (3-PGDH) [MASS=56519]                                                                                                                                                                                   | 0.88 | 3.01  | 1.26 | 0.00 | 1 | 1 | 2      | NAGNC[330]LSPAVIVGLLK                                                  | 1      |
| SES1_HUMAN (Q9Y6P5) Sestrin-1 (p53-regulated protein PA26) [MASS=56557]                                                                                                                                                                                                      | 0.00 | 4.47  | 0.30 | 0.00 | 1 | 1 | 3      | LAAAANEAYTAPLAVSGLLGCC[330]K                                           | 1      |
| SETB2_HUMAN (Q96T68) Probable histone-lysine N-methyltransferase, H3 lysine-9 specific (EC 2.1.1.43) (Histone H3-K9 methyltransferase) (H3-K9-HMTase) (SET domain bifurcated 2) (Chronic lymphocytic leukemia deletion region gene 8 protein) [MASS=81854]                   | 0.00 | 3.48  | 1.37 | 0.00 | 1 | 2 | 3<br>2 | C[330]HFQRRHAK<br>SRC[339]NQATTLDNQNIKK                                | 1<br>1 |
| SFR15_HUMAN (O95104) Splicing factor, arginine/serine-rich 15 (CTD-binding SR-like protein RA4) [MASS=125868]                                                                                                                                                                | *    | 0.44  | *    | *    | * | 1 | 1      | RHSPR                                                                  | 1      |
| SFRP4_HUMAN (Q6FHJ7) Secreted frizzled-related protein 4 precursor (sFRP-4) (Frizzled protein, human endometrium) (FrpHE) [MASS=39827]                                                                                                                                       | *    | 3.76  | *    | *    | * | 1 | 3      | WIDITPDM[147]MVQER                                                     | 1      |
| SFXN1_HUMAN (Q9H9B4) Sideroflexin-1 (Tricarboxylate carrier protein) (TCC) [MASS=35488]                                                                                                                                                                                      | 0.98 | 14.02 | *    | *    | * | 2 | 2<br>3 | FVPFAAVAAANC[330]JINIPLM[147]R<br>MILIGRMSAQVPMNMTITGC[339]M[147]MTFYR | 1<br>1 |
| SFXN3_HUMAN                                                                                                                                                                                                                                                                  | 0.98 | 7.79  | 1.14 | 0.00 | 1 | 1 | 2      | IC[339]M[147]AIPAM[147]AIPPLIM[147]DTLEKKDFLK                          | 1      |
| SHPS1_HUMAN (P78324) Tyrosine-protein phosphatase non-receptor type substrate 1 precursor (SHP substrate 1) (SHPS-1) (Inhibitory receptor SHPS-1) (Signal-regulatory protein alpha-1) (Sirp-alpha-1) (Sirp-alpha-2) (Sirp-alpha-3) (MyD-1 antigen) (Brain Ig-I) [MASS=54812] | 0.00 | 6.56  | 1.00 | 0.00 | 1 | 2 | 3<br>3 | ATPQHTVSFTC[339]ESHGFSPR<br>AKPSAPVVSGPAAR                             | 1<br>1 |
| SIA4C_HUMAN (Q11206) CMP-N-acetylneuraminase-beta-galactosamide-alpha-2,3-sialyltransferase (EC 2.4.99.-) (Beta-galactoside alpha-2,3-sialyltransferase) (Alpha 2,3-sialyltransferase IV) (Alpha 2,3-ST) (GalNAc6S) (STZ) (SIAT4-C) (ST3Gal III) (SAT-3) (ST- [MASS=38045])  | *    | 5.41  | *    | *    | * | 1 | 2      | SM[147]AGSGHNVSQEALAIKR                                                | 1      |
| SIAL_HUMAN (P21815) Bone sialoprotein-2 precursor (Bone sialoprotein II) (BSP II) (Cell-binding sialoprotein) (Integrin-binding sialoprotein) [MASS=35018]                                                                                                                   | *    | 7.57  | *    | *    | * | 1 | 3      | MKTALILLSILGMAC[330]AFSM[147]KNLHR                                     | 1      |

|                                                                                                                                                             |      |      |      |      |   |   |        |                                                      |        |
|-------------------------------------------------------------------------------------------------------------------------------------------------------------|------|------|------|------|---|---|--------|------------------------------------------------------|--------|
| SIRB1_HUMAN (O00241) Signal-regulatory protein beta-1 precursor (SIRP-beta-1) (CD172b antigen) [MASS=43255]                                                 | 0.33 | 4.77 | 1.08 | 0.00 | 1 | 1 | 3      | ATPEHTVSFTC[339]ESHGFSPR                             | 1      |
| SIRT7_HUMAN (Q9NRC8) NAD-dependent deacetylase sirtuin-7 (EC 3.5.1.-) (SIR2-like protein 7) [MASS=44898]                                                    | *    | 4.00 | *    | *    | * | 1 | 3      | GAPLSSAPILGGWFGR                                     | 1      |
| SLIK4_HUMAN (Q8IW52) SLIT and NTRK-like protein 4 precursor [MASS=94330]                                                                                    | 0.00 | 2.27 | 0.34 | 0.00 | 1 | 1 | 2      | ELKC[330]ETPVQFANIELKSLK                             | 1      |
| SLIT2_HUMAN (O94813) Slit homolog 2 protein precursor (Slit-2) [Contains: Slit homolog 2 protein N-product; Slit homolog 2 protein C-product] [MASS=169869] | *    | 1.64 | *    | *    | * | 1 | 3      | KFTC[330]QGPVDVNILAKC[330]NPC[330]LSNPC[339]K        | 1      |
| SMAD6_HUMAN (O43541) Mothers against decapentaplegic homolog 6 (SMAD 6) (Mothers against DPP homolog 6) (Smad6) (hSMAD6) [MASS=53496]                       | *    | 1.21 | *    | *    | * | 1 | 1      | RSGLVR                                               | 1      |
| SMBT1_HUMAN (Q9UJH3) Scm-like with four MBT domains protein 1 (Renal ubiquitous protein 1) [MASS=98141]                                                     | 0.00 | 4.39 | 0.77 | 0.00 | 1 | 2 | 2<br>2 | ELQLDKDSVWHGC[330]GEVLK<br>RSFVC[330]HADSPGIFPVQWSLK | 1<br>1 |
| SMBT2_HUMAN (Q5VUG0) Scm-like with four MBT domains protein 2 [MASS=100562]                                                                                 | *    | 2.01 | *    | *    | * | 1 | 2      | KIAVVQPEKQLPPTVPVK                                   | 1      |

SMCA1\_HUMAN (P28370) Probable global transcription activator SNF2L1 (EC 3.6.1.-) (ATP-dependent helicase SMARCA1) (SWI/SNF-related matrix-associated actin-dependent regulator of chromatin subfamily A member 1) [MASS=114731]

0.00 0.61 17.56 0.00 1 1

SMG1\_HUMAN (Q96Q15) Serine/threonine-protein kinase SMG1 (EC 2.7.11.1) (SMG-1) (hSMG-1) (Lambda/iota protein kinase C-interacting protein) (Lambda-interacting protein) (61E3.4) [MASS=410259]

\* 0.77 \* \* \* 2

2 GIIPQLFSR

4

2 DEEAALADGEDVPYENSVR

1

SMRA3\_HUMAN (Q14527) SWI/SNF-related matrix-associated actin-dependent regulator of chromatin subfamily A member 3 (EC 3.6.1.-) (Sucrose nonfermenting protein 2-like 3) (DNA-binding protein/plasminogen activator inhibitor 1 regulator) (Helicase-like tran [MASS=113928]

\* 2.58 \* \* \* 2

3 FIVKDSVEENM[147]LK

1

2 VNNVNGNQVGHKLK

1

SMRC1\_HUMAN (Q92922) SWI/SNF-related matrix-associated actin-dependent regulator of chromatin subfamily C member 1 (SWI/SNF complex 155 kDa subunit) (BRG1-associated factor 155) [MASS=122752]

0.30 1.72 0.18 0.88 3 2

1 PVSFR

1

2 AGGALC[330]HILGAAYK

3

|                                                                                                                                                                     |      |       |      |      |   |   |   |                                           |   |
|---------------------------------------------------------------------------------------------------------------------------------------------------------------------|------|-------|------|------|---|---|---|-------------------------------------------|---|
| SMYD4_HUMAN (Q8IYR2) SET and MYND domain-containing protein 4 [MASS=89122]                                                                                          | *    | 3.48  | *    | *    | * | 1 | 3 | LSGC[330]QRDAESFLWAEHAVVGEIADGLAR         | 1 |
| SNAB_HUMAN (Q9H115) Beta-soluble NSF attachment protein (SNAP-beta) (N-ethylmaleimide-sensitive factor attachment protein, beta) [MASS=33557]                       | 1.00 | 4.70  | 1.62 | 0.00 | 1 | 1 | 2 | AALC[330]HFIVDELNAK                       | 1 |
| SNX13_HUMAN (Q9Y5W8) Sorting nexin-13 (RGS domain- and PHOX domain-containing protein) (RGS-PX1) [MASS=112188]                                                      | 0.00 | 0.83  | *    | *    | * | 1 | 1 | KVYELMLR                                  | 1 |
| SNX22_HUMAN (Q96L94) Sorting nexin-22 [MASS=22068]                                                                                                                  | 0.00 | 7.25  | 0.98 | 0.00 | 1 | 1 | 2 | SHM[147]VFRVEVLC[339]SGR                  | 1 |
| SORCN_HUMAN (P30626) Sorcin (22 kDa protein) (CP-22) (V19) [MASS=21676]                                                                                             | 0.99 | 10.10 | 0.74 | 0.00 | 1 | 1 | 3 | C[330]LTQSGIAGGYKPFNLETC[330]JR           | 1 |
| SP110_HUMAN (Q9HB58) Sp110 nuclear body protein (Speckled 110 kDa) (Transcriptional coactivator Sp110) (Interferon-induced protein 41/75) [MASS=78504]              | *    | 6.68  | *    | *    | * | 3 | 3 | DKEDPQEMPHSPLGSM[147]PEIR                 | 1 |
|                                                                                                                                                                     |      |       |      |      |   |   | 3 | EYPNLVTIYRSFKR                            | 1 |
|                                                                                                                                                                     |      |       |      |      |   |   | 3 | PKSDTVDFHC[330]SK                         | 1 |
| SPRE_HUMAN (P35270) Sepiapterin reductase (EC 1.1.1.153) (SPR) [MASS=28048]                                                                                         | 0.00 | 18.39 | 1.08 | 0.00 | 1 | 2 | 3 | LVDC[330]KVSAQKLLSLEK                     | 1 |
|                                                                                                                                                                     |      |       |      |      |   |   | 3 | GFVDLSDSTQVNNYWALNLTSM[147]LC[330]LTSSVLK | 1 |
| SRA1_HUMAN (Q9HD15) Steroid receptor RNA activator 1 (Steroid receptor RNA activator protein) (SRAP) [MASS=25673]                                                   | *    | 9.32  | *    | *    | * | 1 | 3 | RM[147]ALLVQELSSHRWDAADDIHR               | 1 |
| SRPR_HUMAN (P08240) Signal recognition particle receptor subunit alpha (SR-alpha) (Docking protein alpha) (DP-alpha) [MASS=69811]                                   | 0.00 | 6.74  | 0.45 | 0.00 | 1 | 3 | 3 | ISFWLLENGFSVLIAAC[330]DTFR                | 1 |
|                                                                                                                                                                     |      |       |      |      |   |   | 1 | PVRSMIETR                                 | 1 |
|                                                                                                                                                                     |      |       |      |      |   |   | 1 | SLNAKAVVAALM[147]K                        | 1 |
| SSDH_HUMAN (P51649) Succinate semialdehyde dehydrogenase, mitochondrial precursor (EC 1.2.1.24) (NAD(+)-dependent succinic semialdehyde dehydrogenase) [MASS=57214] | 0.92 | 3.74  | 1.34 | 0.00 | 1 | 2 | 1 | AAYE AFC[339]R                            | 1 |
|                                                                                                                                                                     |      |       |      |      |   |   | 3 | RVYGDIIHTPAK                              | 1 |
| STXB1_HUMAN (P61764) Syntaxin-binding protein 1 (Unc-18 homolog) (Unc-18A) (Unc-18-1) (N-Sec1) (p67) [MASS=67568]                                                   | 1.00 | 7.74  | 0.93 | 0.11 | 3 | 3 | 2 | YSTHLHLAEDC[339]M[147]K                   | 1 |
|                                                                                                                                                                     |      |       |      |      |   |   | 2 | AAHVFFTDSC[330]PDALFNELVK                 | 1 |
|                                                                                                                                                                     |      |       |      |      |   |   | 1 | LAEQIATLC[330]ATLK                        | 1 |

|                                                                                                                                                                                                                                                 |      |      |      |      |   |   |                                                                                                                            |                                |   |
|-------------------------------------------------------------------------------------------------------------------------------------------------------------------------------------------------------------------------------------------------|------|------|------|------|---|---|----------------------------------------------------------------------------------------------------------------------------|--------------------------------|---|
| SUCA_HUMAN (P53597) Succinyl-CoA ligase [GDP-forming] alpha-chain, mitochondrial precursor (EC 6.2.1.4) (Succinyl-CoA synthetase, alpha chain) (SCS-alpha) [MASS=35047]                                                                         | *    | 7.21 | *    | *    | * | 1 | 3                                                                                                                          | IIC[330]QGFTGKQGTFFHSQQALEYGTK | 1 |
| SUCB1_HUMAN (Q9P2R7) Succinyl-CoA ligase [ADP-forming] beta-chain, mitochondrial precursor (EC 6.2.1.5) (Succinyl-CoA synthetase, betaA chain) (SCS-betaA) (ATP-specific succinyl-CoA synthetase subunit beta) (NY-REN-39 antigen) [MASS=50317] | 1.00 | 8.21 | 1.31 | 0.07 | 4 | 3 | 2 ILAC[339]DDLDEAAR<br>2 ILAC[330]DDLDEAAR<br>2 IC[339]NQVLVC[339]ER<br>3 GYVAKSPDEAYAIKK<br><br>2 MDHKTQHHR<br>1 VNPSSYSR | 2<br>1<br>1<br>1<br><br>1<br>8 |   |
| SUHW4_HUMAN (Q6N043) Suppressor of hairy wing homolog 4 [MASS=109298]                                                                                                                                                                           | *    | 1.74 | *    | *    | * | 2 |                                                                                                                            |                                |   |
| SURF4_HUMAN (O15260) Surfeit locus protein 4 [MASS=30394]                                                                                                                                                                                       | 0.99 | 4.83 | 1.09 | 0.00 | 1 | 1 | 2 LC[330]LISTFLEDGIR                                                                                                       | 1                              |   |
| SYA_HUMAN (P49588) Alanyl-tRNA synthetase (EC 6.1.1.7) (Alanine--tRNA ligase) (AlaRS) (NY-REN-42 antigen) [MASS=106801]                                                                                                                         | 1.00 | 6.30 | 0.81 | 0.02 | 2 | 3 | 2 GSLVAPDRLR<br>2 NVGC[330]LQEALQLATSFAQLR<br>3 GGGKDVSAQATGKNVGC[330]LQEALQLATSFAQLR<br>2 NVGC[339]LQEALQLATSFAQLR        | 1<br>1<br>1<br>1               |   |
| SYIM_HUMAN (Q9NSE4) Isoleucyl-tRNA synthetase, mitochondrial precursor (EC 6.1.1.5) (Isoleucine--tRNA ligase) (IleRS) [MASS=113791]                                                                                                             | 0.96 | 3.16 | 1.49 | 0.00 | 1 | 2 | 2 FIPGSALNGM[147]VEMMDRR<br>2 SC[339]QTALVEILDVIVR                                                                         | 1<br>1                         |   |
| SYN1_HUMAN (P17600) Synapsin-1 (Synapsin I) (Brain protein 4.1) [MASS=74111]                                                                                                                                                                    | 0.00 | 4.96 | *    | *    | * | 2 | 3 QSRPVAGGPGAPPAARPPASPSPQR<br>2 MGHAHSGM[147]GK                                                                           | 1<br>1                         |   |
| SYNE2_HUMAN (Q8WXH0) Nesprin-2 (Nuclear envelope spectrin repeat protein 2) (Syne-2) (Synaptic nuclear envelope protein 2) (Nucleus and actin connecting element protein) (Protein NUANCE) [MASS=796379]                                        | *    | 0.70 | *    | *    | * | 4 | 3 RIAEIEIVKEEFNEHLEVVDK<br>2 QVDSVLKHVKK<br>1 ELESYMM[147]JR<br>1 GQAE LQM[147]K                                           | 1<br>1<br>1<br>1               |   |

|                                                                                                                                        |      |       |      |      |    |   |   |                                           |   |
|----------------------------------------------------------------------------------------------------------------------------------------|------|-------|------|------|----|---|---|-------------------------------------------|---|
| SYNJ1_HUMAN (O43426) Synaptojanin-1 (EC 3.1.3.36) (Synaptic inositol-1,4,5-trisphosphate 5-phosphatase 1) [MASS=173345]                | *    | 1.59  | *    | *    | *  | 2 | 2 | PPPPRPVAPPTR                              | 1 |
|                                                                                                                                        |      |       |      |      |    |   | 2 | RPPPPRPVAPPTR                             | 1 |
| SYPH_HUMAN (P08247) Synaptophysin (Major synaptic vesicle protein p38) [MASS=33845]                                                    | 1.00 | 8.95  | 1.01 | 0.06 | 3  | 2 | 3 | M[147]ATDPENIIKEM[147]PVC[330]R           | 1 |
|                                                                                                                                        |      |       |      |      |    |   | 2 | LHQVYFDAPTC[339]R                         | 1 |
|                                                                                                                                        |      |       |      |      |    |   | 1 | LHQVYFDAPTC[339]R                         | 1 |
|                                                                                                                                        |      |       |      |      |    |   | 2 | LHQVYFDAPTC[330]R                         | 1 |
| SYPM_HUMAN (Q7L3T8) Probable prolyl-tRNA synthetase, mitochondrial precursor (EC 6.1.1.15) (Proline--tRNA ligase) (ProRS) [MASS=53262] | *    | 2.95  | *    | *    | *  | 1 | 2 | RLLLSRVFQPQNL                             | 1 |
| SYT14_HUMAN (Q8NB59) Synaptotagmin-14 (Synaptotagmin XIV) (SytXIV) [MASS=62288]                                                        | *    | 4.50  | *    | *    | *  | 1 | 3 | YSPLSAEYDGYSSSEASIDEGNC[330]IQR           | 1 |
| T2R60_HUMAN (P59551) Taste receptor type 2 member 60 (T2R60) (T2R56) [MASS=36336]                                                      | *    | 2.83  | *    | *    | *  | 1 | 2 | ALLTTSRFR                                 | 1 |
| TACT_HUMAN (P40200) T-cell surface protein tactile precursor (CD96 antigen) [MASS=63887]                                               | 0.00 | 2.46  | 0.45 | 0.00 | 1  | 1 | 2 | YC[339]AVYYIIQHFVK                        | 1 |
| TATD2_HUMAN (Q93075) TatD DNase domain-containing deoxyribonuclease 2 (EC 3.1.21.-) [MASS=85039]                                       | 0.00 | 5.26  | 1.29 | 0.00 | 1  | 3 | 2 | QVPKSLC[339]QYAHPLALHTVR                  | 1 |
|                                                                                                                                        |      |       |      |      |    |   | 2 | DQGSTMILK                                 | 1 |
|                                                                                                                                        |      |       |      |      |    |   | 2 | EPC[330]DVAPSSR                           | 1 |
|                                                                                                                                        |      |       |      |      |    |   | 2 | SIQFVDWC[330]PTGFK                        | 2 |
|                                                                                                                                        |      |       |      |      |    |   | 2 | YMAC[339]C[339]LLYR                       | 1 |
|                                                                                                                                        |      |       |      |      |    |   | 2 | TIGGGDSSFTTFFC[330]ETGAGK                 | 2 |
|                                                                                                                                        |      |       |      |      |    |   | 2 | YMAC[330]C[330]LLYR                       | 1 |
|                                                                                                                                        |      |       |      |      |    |   | 3 | AYHEQLSVAEITNAC[330]FEPANQMVK             | 1 |
| TBA1_HUMAN (P68366) Tubulin alpha-1 chain (Alpha-tubulin 1) (Testis-specific alpha-tubulin) (Tubulin H2-alpha) [MASS=49924]            | 1.00 | 25.00 | 1.07 | 0.10 | 10 | 6 | 2 | SIQFVDWC[339]PTGFK                        | 3 |
|                                                                                                                                        |      |       |      |      |    |   | 2 | YM[147]AC[339]C[339]LLYR                  | 2 |
|                                                                                                                                        |      |       |      |      |    |   | 3 | AYHEQLSVAEITNAC[330]FEPANQM[147]VK        | 1 |
|                                                                                                                                        |      |       |      |      |    |   | 2 | YM[147]AC[330]C[330]LLYR                  | 2 |
|                                                                                                                                        |      |       |      |      |    |   | 2 | RSIQFVDWC[339]PTGFK                       | 1 |
|                                                                                                                                        |      |       |      |      |    |   | 3 | LSDQC[339]TGLQGFLVFHSGGGTSGGFTSLLM[147]ER | 1 |
|                                                                                                                                        |      |       |      |      |    |   | 2 | TIGGGDSSFTTFFC[339]ETGAGK                 | 1 |

|                                                                                              |                                                  |       |      |      |   |   |   |                                            |   |
|----------------------------------------------------------------------------------------------|--------------------------------------------------|-------|------|------|---|---|---|--------------------------------------------|---|
| TBA2_HUMAN (Q13748) Tubulin alpha-2 chain (Alpha-tubulin 2) [MASS=49959]                     | 1.00                                             | 2.89  | *    | *    | * | 1 | 2 | TIQFVDWC[330]PTGFK                         | 1 |
|                                                                                              |                                                  |       |      |      |   |   | 1 | TIQFVDWC[339]PTGFK                         | 1 |
|                                                                                              |                                                  |       |      |      |   |   | 2 | TIQFVDWC[339]PTGFK                         | 1 |
| TBA3_HUMAN (Q71U36) Tubulin alpha-3 chain (Alpha-tubulin 3) (Tubulin B-alpha-1) [MASS=50135] | 1.00                                             | 7.10  | 1.14 | 0.06 | 9 | 1 | 3 | LADQC[339]TGLQGFLVFHSGGGTGSFGFTSLLM[147]ER | 1 |
|                                                                                              |                                                  |       |      |      |   |   | 2 | LADQC[339]TGLQGFLVFHSGGGTGSFGFTSLLM[147]ER | 1 |
|                                                                                              |                                                  |       |      |      |   |   | 3 | LADQC[339]TGLQGFLVFHSGGGTGSFGFTSLLMER      | 2 |
|                                                                                              |                                                  |       |      |      |   |   | 3 | LADQC[330]TGLQGFLVFHSGGGTGSFGFTSLLM[147]ER | 2 |
|                                                                                              |                                                  |       |      |      |   |   | 1 | NMM[147]AAC[339]DPR                        | 1 |
| TBB2C_HUMAN (P68371) Tubulin beta-2C chain (Tubulin beta-2 chain) [MASS=49831]               | 1.00                                             | 29.66 | *    | *    | * | 6 | 3 | EAESC[339]DC[339]LQGFQLTHSLGGGTGSGMGTLLISK | 1 |
|                                                                                              |                                                  |       |      |      |   |   | 2 | NM[147]MAAC[339]DPR                        | 1 |
|                                                                                              |                                                  |       |      |      |   |   | 1 | TAVC[330]DIPPR                             | 1 |
|                                                                                              |                                                  |       |      |      |   |   | 2 | LTTPTYGDLNHLVSATM[147]SGVTTC[330]LR        | 2 |
|                                                                                              |                                                  |       |      |      |   |   | 2 | NM[147]M[147]AAC[330]DPR                   | 2 |
|                                                                                              |                                                  |       |      |      |   |   | 3 | ALTVPELTQQM[147]FDAKNM[147]MAAC[339]DPR    | 1 |
|                                                                                              |                                                  |       |      |      |   |   | 2 | TAVC[330]DIPPR                             | 3 |
|                                                                                              |                                                  |       |      |      |   |   | 3 | LTTPTYGDLNHLVSATM[147]SGVTTC[339]LR        | 1 |
|                                                                                              |                                                  |       |      |      |   |   | 2 | LTTPTYGDLNHLVSATMSGVTTC[339]LR             | 1 |
|                                                                                              |                                                  |       |      |      |   |   | 2 | TAVC[339]DIPPR                             | 5 |
|                                                                                              |                                                  |       |      |      |   |   | 2 | NM[147]M[147]AAC[339]DPR                   | 1 |
| 3                                                                                            | EAESC[339]DC[339]LQGFQLTHSLGGGTGSGM[147]GTLLISK  | 1     |      |      |   |   |   |                                            |   |
| 3                                                                                            | KEAESC[339]DC[339]LQGFQLTHSLGGGTGSGM[147]GTLLISK | 1     |      |      |   |   |   |                                            |   |

|                                                                                                                                                                     |      |       |      |      |    |   |  |   |                                 |   |
|---------------------------------------------------------------------------------------------------------------------------------------------------------------------|------|-------|------|------|----|---|--|---|---------------------------------|---|
|                                                                                                                                                                     |      |       |      |      |    |   |  | 2 | EIVHIQAGQC[339]GNQIGAK          | 2 |
|                                                                                                                                                                     |      |       |      |      |    |   |  | 2 | EIVHIQAGQC[330]GNQIGAK          | 1 |
|                                                                                                                                                                     |      |       |      |      |    |   |  | 2 | M[147]REIVHIQAGQC[339]GNQIGAK   | 1 |
|                                                                                                                                                                     |      |       |      |      |    |   |  | 3 | EIVHIQAGQC[339]GNQIGAK          | 1 |
|                                                                                                                                                                     |      |       |      |      |    |   |  | 3 | M[147]REIVHIQAGQC[339]GNQIGAK   | 2 |
| TBB2_HUMAN (P07437) Tubulin beta-2 chain [MASS=49671]                                                                                                               | 1.00 | 11.49 | 1.11 | 0.07 | 31 | 3 |  | 3 | MREIVHIQAGQC[330]GNQIGAK        | 2 |
|                                                                                                                                                                     |      |       |      |      |    |   |  | 3 | M[147]REIVHIQAGQC[330]GNQIGAK   | 1 |
|                                                                                                                                                                     |      |       |      |      |    |   |  | 3 | MREIVHIQAGQC[339]GNQIGAK        | 2 |
|                                                                                                                                                                     |      |       |      |      |    |   |  | 2 | ALTVPELTQQVFDK                  | 1 |
| TBB4_HUMAN                                                                                                                                                          | 1.00 | 4.05  | *    | *    | *  | 1 |  | 3 | GRM[147]SMKEVDEQM[147]LSVQSK    | 1 |
| TBB6_HUMAN (Q9BUF5) Tubulin beta-6 chain [MASS=49857]                                                                                                               | 1.00 | 1.35  | *    | *    | *  | 1 |  | 1 | GPM[147]SM[147]K                | 1 |
| TBC14_HUMAN (Q9P2M4) TBC1 domain family member 14 [MASS=76626]                                                                                                      | 0.35 | 3.10  | 1.51 | 0.00 | 1  | 1 |  | 2 | AFQSAC[339]ALPSC[339]APPAPSSTER | 1 |
| TBCC_HUMAN (Q15814) Tubulin-specific chaperone C (Tubulin-folding cofactor C) (CFC) [MASS=39220]                                                                    | *    | 5.78  | *    | *    | *  | 1 |  | 3 | M[147]ESVSC[339]SAAAVRTGDMESQR  | 1 |
| TBX15_HUMAN (Q96SF7) T-box transcription factor TBX15 (T-box protein 15) [MASS=65757]                                                                               | 0.00 | 2.82  | 1.55 | 0.00 | 1  | 1 |  | 3 | ESQLC[339]NLNLSDYPPC[339]AR     | 1 |
| TCOF_HUMAN (Q13428) Treacle protein (Treacher Collins syndrome protein) [MASS=144311]                                                                               | *    | 0.78  | *    | *    | *  | 1 |  | 2 | AEEDAALQAKK                     | 1 |
| TCPZ_HUMAN (P40227) T-complex protein 1 subunit zeta (TCP-1-zeta) (CCT-zeta) (CCT-zeta-1) (Tcp20) (HTR3) (Acute morphine dependence-related protein 2) [MASS=57893] | 0.64 | 6.23  | 1.13 | 0.00 | 1  | 2 |  | 2 | VC[339]GDSKGFVVINQK             | 1 |
|                                                                                                                                                                     |      |       |      |      |    |   |  | 3 | SVTLLIKGPNKHTLTQIK              | 1 |
| TENR_HUMAN (Q92752) Tenascin-R precursor (TN-R) (Restrictin) (Janusin) [MASS=149547]                                                                                | 0.28 | 2.65  | 2.68 | 0.00 | 1  | 2 |  | 3 | LQVYC[339]DMTTDGGGWIVFQR        | 1 |
|                                                                                                                                                                     |      |       |      |      |    |   |  | 3 | ITFTPSSGIASEVTPK                | 1 |
| TERA_HUMAN (P55072) Transitional endoplasmic reticulum ATPase (TER ATPase) (15S Mg(2+)-ATPase p97 subunit) (Valosin-containing protein) (VCP) [MASS=89190]          | 0.95 | 7.70  | 1.29 | 0.00 | 1  | 3 |  | 2 | QAAPC[330]VLFFDELDSIAK          | 1 |
|                                                                                                                                                                     |      |       |      |      |    |   |  | 3 | EDEEESLNEVGYDDIGGC[339]RK       | 1 |
|                                                                                                                                                                     |      |       |      |      |    |   |  | 3 | DVDLEFLAKMTNGFSGADLTEIC[330]QR  | 1 |



|                                                                                                                                                                                           |      |       |      |      |   |   |   |                                   |   |
|-------------------------------------------------------------------------------------------------------------------------------------------------------------------------------------------|------|-------|------|------|---|---|---|-----------------------------------|---|
| TEX15_HUMAN (Q9BXT5) Testis-expressed sequence 15 protein [MASS=315360]                                                                                                                   | *    | 1.25  | *    | *    | * | 3 | 3 | KDTEDRITWK                        | 1 |
|                                                                                                                                                                                           |      |       |      |      |   |   | 1 | MAHIR                             | 2 |
| TF2AY_HUMAN (Q9UNN4) TFIIA-alpha and beta-like factor (General transcription factor II A, 1-like factor) [MASS=52445]                                                                     | 0.00 | 2.72  | 0.25 | 0.00 | 1 | 1 | 3 | PGILGVNHTPILPAHSETC[330]K         | 1 |
|                                                                                                                                                                                           |      |       |      |      |   |   | 3 | NRM[147]YGC[330]DSVKQPR           | 1 |
| TF3C4_HUMAN (Q9UKN8) General transcription factor 3C polypeptide 4 (EC 2.3.1.48) (Transcription factor III C subunit delta) (TF3C-delta) (TFIIIC 90 kDa subunit) (TFIIIC 90) [MASS=92001] | *    | 1.34  | *    | *    | * | 1 | 2 | C[339]LLAALTMDNR                  | 1 |
| TGT_HUMAN (Q9BXR0) Queuine tRNA-ribosyltransferase (EC 2.4.2.29) (tRNA-guanine transglycosylase) (Guanine insertion enzyme) [MASS=42492]                                                  | 0.00 | 3.36  | 6.55 | 0.00 | 1 | 1 | 3 | GITTEQLDALGC[339]R                | 1 |
| THIL_HUMAN (P24752) Acetyl-CoA acetyltransferase, mitochondrial precursor (EC 2.3.1.9) (Acetoacetyl-CoA thiolase) (T2) [MASS=45199]                                                       | 0.00 | 2.81  | 4.94 | 0.00 | 1 | 1 | 2 | IHMGC[339]AENTAK                  | 1 |
| THUM1_HUMAN (Q9NXG2) THUMP domain-containing protein 1 [MASS=39315]                                                                                                                       | 0.00 | 7.93  | 0.63 | 0.00 | 1 | 2 | 1 | LESADK                            | 1 |
|                                                                                                                                                                                           |      |       |      |      |   |   | 3 | KC[330]VEEAYSLLENEYGDDM[147]YGPEK | 1 |
| THY1_HUMAN (P04216) Thy-1 membrane glycoprotein precursor (Thy-1 antigen) (CD90 antigen) (CDw90 antigen) [MASS=17935]                                                                     | 1.00 | 8.70  | 0.93 | 0.05 | 4 | 1 | 2 | VTSLTAC[339]LVDQSLR               | 1 |
|                                                                                                                                                                                           |      |       |      |      |   |   | 2 | VTSLTAC[330]LVDQSLR               | 3 |
| TIAM1_HUMAN (Q13009) T-lymphoma invasion and metastasis-inducing protein 1 (TIAM-1 protein) [MASS=177637]                                                                                 | 0.00 | 2.14  | 0.85 | 0.00 | 1 | 2 | 2 | C[330]YLASLQGGELPNPKR             | 1 |
|                                                                                                                                                                                           |      |       |      |      |   |   | 3 | QHSYTSNGPTFM[147]ETASFK           | 1 |
| TIF1G_HUMAN (Q9UPN9) Transcription intermediary factor 1-gamma (TIF1-gamma) (Tripartite motif-containing protein 33) (RET-fused gene 7 protein) (Rfg7 protein) [MASS=122520]              | 0.00 | 2.22  | 0.66 | 0.00 | 1 | 2 | 2 | DIGKPEVEYDC[330]DNLQHSKK          | 1 |
|                                                                                                                                                                                           |      |       |      |      |   |   | 1 | TLSFK                             | 1 |
| TIM13_HUMAN (Q9Y5L4) Mitochondrial import inner membrane translocase subunit Tim13 [MASS=10500]                                                                                           | *    | 16.84 | *    | *    | * | 1 | 3 | MEGGFGSDFGSGSGK                   | 1 |
| TIM9_HUMAN (Q9Y5J7) Mitochondrial import inner membrane translocase subunit Tim9 [MASS=10378]                                                                                             | 0.87 | 17.98 | 1.01 | 0.00 | 1 | 1 | 3 | LTETC[339]FLDC[339]VKDFTR         | 1 |

|                                                                                                                                                                                                                                                |      |      |      |      |   |   |   |                                               |   |
|------------------------------------------------------------------------------------------------------------------------------------------------------------------------------------------------------------------------------------------------|------|------|------|------|---|---|---|-----------------------------------------------|---|
| TINAG_HUMAN (Q9UJW2) Tubulointerstitial nephritis antigen (TIN-Ag) [MASS=54646]                                                                                                                                                                | 0.00 | 1.89 | 1.19 | 0.00 | 1 | 1 | 2 | IYQC[330]SPPYR                                | 1 |
| TLN2_HUMAN (Q9Y4G6) Talin-2 [MASS=271553]                                                                                                                                                                                                      | 0.00 | 2.20 | *    | *    | * | 3 | 2 | RVAGAVTELIQAAEAMK                             | 1 |
|                                                                                                                                                                                                                                                |      |      |      |      |   |   | 3 | VPEAQTGQASDYGLFLSDEDPRK                       | 1 |
|                                                                                                                                                                                                                                                |      |      |      |      |   |   | 3 | GAAANPENEDQQQLR                               | 1 |
| TNR16_HUMAN (P08138) Tumor necrosis factor receptor superfamily member 16 precursor (Low-affinity nerve growth factor receptor) (NGF receptor) (Gp80-LNGFR) (p75 ICD) (Low affinity neurotrophin receptor p75NTR) (CD271 antigen) [MASS=45183] | 0.00 | 3.75 | 2.00 | 0.00 | 1 | 1 | 2 | EAC[339]PTGLYTHSGEC[339]C[339]K               | 1 |
| TOM70_HUMAN (O94826) Mitochondrial precursor proteins import receptor (Translocase of outer membrane TOM70) [MASS=67454]                                                                                                                       | 0.99 | 6.74 | 1.07 | 0.00 | 1 | 3 | 1 | EANVKLRANALIK                                 | 1 |
|                                                                                                                                                                                                                                                |      |      |      |      |   |   | 3 | SEM[147]EM[147]AHLYSLC[339]DAAHAQTEVAK        | 1 |
|                                                                                                                                                                                                                                                |      |      |      |      |   |   | 1 | RNSER                                         | 1 |
| TOPB1_HUMAN (Q92547) DNA topoisomerase 2-binding protein 1 (DNA topoisomerase II-binding protein 1) (DNA topoisomerase IIbeta-binding protein 1) (TopBP1) [MASS=170677]                                                                        | 0.00 | 2.56 | 0.73 | 0.00 | 1 | 2 | 3 | HGGQYMGQLKMNEC[330]THLIVQEPKGQK               | 1 |
|                                                                                                                                                                                                                                                |      |      |      |      |   |   | 2 | M[147]NEC[330]THLIVQEPK                       | 1 |
| TR19L_HUMAN (Q969Z4) Tumor necrosis factor receptor superfamily member 19L precursor (Receptor expressed in lymphoid tissues) [MASS=46092]                                                                                                     | 0.00 | 5.12 | 1.59 | 0.00 | 1 | 1 | 3 | VPC[330]QPC[330]SWAPLGTHGC[330]DEWGRR         | 1 |
| TR4_HUMAN (P49116) Orphan nuclear receptor TR4 (Orphan nuclear receptor TAK1) [MASS=65414]                                                                                                                                                     | 0.21 | 3.19 | 1.06 | 0.00 | 1 | 2 | 2 | LQEFC[339]NSMAK                               | 1 |
|                                                                                                                                                                                                                                                |      |      |      |      |   |   | 2 | LLGKTDVQR                                     | 2 |
| TRI10_HUMAN (Q9UDY6) Tripartite motif-containing protein 10 (RING finger protein 9) (B30-RING finger protein) [MASS=55036]                                                                                                                     | 0.00 | 6.24 | 0.20 | 0.00 | 1 | 1 | 3 | EM[147]KM[147]FLEKLC[330]FELDYEPAHISLDPQTSHPK | 1 |
| TRI48_HUMAN (Q8IWZ4) Tripartite motif-containing protein 48 (RING finger protein 101) [MASS=43408]                                                                                                                                             | 0.00 | 9.07 | 0.59 | 0.00 | 1 | 2 | 3 | ASLWFLSSEEQMC[339]GIHRETK                     | 1 |
|                                                                                                                                                                                                                                                |      |      |      |      |   |   | 2 | M[147]QSLWEKAC[339]JENQR                      | 1 |
| TRIM3_HUMAN (O75382) Tripartite motif-containing protein 3 (RING finger protein 22) (Brain-expressed RING finger protein) (RING finger protein 97) [MASS=80836]                                                                                | *    | 3.09 | *    | *    | * | 1 | 2 | GRLPQLSAAIALVGGISQQLQER                       | 1 |

|                                                                                                                                                                                   |      |      |      |      |   |   |                  |                                                                               |                  |
|-----------------------------------------------------------------------------------------------------------------------------------------------------------------------------------|------|------|------|------|---|---|------------------|-------------------------------------------------------------------------------|------------------|
| TRIO_HUMAN (O75962) Triple functional domain protein (PTPRF-interacting protein) [MASS=341614]                                                                                    | 0.00 | 0.43 | 0.52 | 0.00 | 1 | 1 | 2                | AEKYMSNVDSWC[330]K                                                            | 1                |
| TRPM3_HUMAN (Q9HCF6) Transient receptor potential cation channel subfamily M member 3 (Long transient receptor potential channel 3) (LTrpC3) (Melastatin-2) (MLSN2) [MASS=197529] | 0.00 | 2.14 | 1.74 | 0.00 | 1 | 2 | 3<br>2           | HRDFIAHTC[330]SQM[147]LLTDM[147]WM[147]GR<br>RATIAISSQEGDNSER                 | 1<br>1           |
| TRPS1_HUMAN (Q9UHF7) Zinc finger transcription factor Trps1 (Zinc finger protein GC79) (Tricho-rhino-phalangeal syndrome type I protein) [MASS=141520]                            | *    | 3.75 | *    | *    | * | 2 | 3<br>3           | SKTDLLVNDNPDPAPLSPELQDFK<br>KDFSSKGAEDNMVTSYNC[330]QFC[339]DFR                | 1<br>1           |
| TRRAP_HUMAN (Q9Y4A5) Transformation/transcription domain-associated protein (350/400 kDa PCAF-associated factor) (PAF350/400) (STAF40) (Tra1 homolog) [MASS=437584]               | *    | 2.25 | *    | *    | * | 7 | 3<br>2<br>2<br>1 | TFEQALTGAFMSAVIKDLR<br>C[330]ATPLKDEER<br>NYSIAQK<br>NNSLHDM[147]K            | 1<br>1<br>1<br>2 |
| TRYA1_HUMAN (P15157) Tryptase alpha-1 precursor (EC 3.4.21.59) (Tryptase-1) [MASS=30772]                                                                                          | 0.00 | 4.36 | 0.19 | 0.00 | 1 | 1 | 3                | VPIMENHIC[330]DAK                                                             | 1                |
| TRYG1_HUMAN (Q9NRR2) Tryptase gamma precursor (EC 3.4.21.-) (Transmembrane tryptase) [Contains: Tryptase gamma light chain; Tryptase gamma heavy chain] [MASS=33827]              | 0.00 | 6.23 | 4.81 | 0.00 | 1 | 1 | 2                | MALGAC[339]GLLLLLAVPGVSLR                                                     | 1                |
| TS1R2_HUMAN (Q8TE23) Taste receptor type 1 member 2 precursor (G-protein coupled receptor 71) (Sweet taste receptor T1R2) [MASS=95072]                                            | 0.00 | 2.86 | 1.50 | 0.00 | 1 | 1 | 3                | DIC[339]IAFQETLPTLQPNQNMSEER                                                  | 1                |
| TSPY1_HUMAN (Q01534) Testis-specific Y-encoded protein 1 [MASS=35126]                                                                                                             | 0.00 | 9.42 | 0.81 | 0.00 | 1 | 1 | 3                | HHNSLNFFNWFSHDHFAGSNKIAEILC[330]K                                             | 1                |
| TTC17_HUMAN (Q96AE7) Tetratricopeptide repeat protein 17 (TPR repeat protein 17) [MASS=129558]                                                                                    | 0.00 | 4.29 | 1.56 | 0.00 | 1 | 3 | 2<br>3<br>2      | C[339]PEC[339]ENSLK<br>LIQEEQILRNIIHETQM[147]AKEAQLGNHQIC[330]R<br>NISGALEAFR | 1<br>1<br>1      |
| TYPH_HUMAN (P19971) Thymidine phosphorylase precursor (EC 2.4.2.4) (TdRPase) (TP) (Platelet-derived endothelial cell growth factor) (PD-ECGF) (Gliostatin) [MASS=49955]           | *    | 3.32 | *    | *    | * | 1 | 3                | ELAKTLVGVGASLGLR                                                              | 1                |

|                                                                                                                                                                                                                                            |                |       |      |      |   |   |   |                                     |   |
|--------------------------------------------------------------------------------------------------------------------------------------------------------------------------------------------------------------------------------------------|----------------|-------|------|------|---|---|---|-------------------------------------|---|
| TYRO_HUMAN (P14679) Tyrosinase precursor (EC 1.14.18.1) (Monophenol monooxygenase) (Tumor rejection antigen AB) (SK29-AB) (LB24-AB) [MASS=60393]                                                                                           | 0.00           | 2.27  | 0.46 | 0.00 | 1 | 1 | 2 | FGFWGPNC[330]TERR                   | 1 |
| UBP33_HUMAN (Q8TEY7) Ubiquitin carboxyl-terminal hydrolase 33 (EC 3.1.2.15) (Ubiquitin thioesterase 33) (Ubiquitin-specific-processing protease 33) (Deubiquitinating enzyme 33) (VHL-interacting deubiquitinating enzyme 1) [MASS=106752] | 0.00           | 3.18  | 1.89 | 0.00 | 1 | 1 | 3 | QWLNKFKTFAEPGPISNNDFLC[339]IHGGVPPR | 1 |
| UBP4_HUMAN (Q13107) Ubiquitin carboxyl-terminal hydrolase 4 (EC 3.1.2.15) (Ubiquitin thioesterase 4) (Ubiquitin-specific-processing protease 4) (Deubiquitinating enzyme 4) (Ubiquitous nuclear protein homolog) [MASS=108564]             | 0.29           | 5.71  | 0.17 | 0.00 | 1 | 3 | 3 | KSRPSSTSSASALYGQPLLSVPK             | 1 |
|                                                                                                                                                                                                                                            |                |       |      |      |   |   | 2 | QM[147]WGRDAHVAPSM[147]FK           | 1 |
|                                                                                                                                                                                                                                            |                |       |      |      |   |   | 2 | HKLTLESYQAVC[330]DR                 | 1 |
| UCHL1_HUMAN (P09936) Ubiquitin carboxyl-terminal hydrolase isozyme L1 (EC 3.4.19.12) (EC 6.-.-.-) (UCH-L1) (Ubiquitin thioesterase L1) (Neuron cytoplasmic protein 9.5) (PGP 9.5) (PGP9.5) [MASS=24824]                                    | 0.00           | 9.87  | 2.74 | 0.00 | 1 | 1 | 3 | QTIGNSC[339]GTIGLIHAVANNQDK         | 1 |
| UCP4_HUMAN (O95847) Mitochondrial uncoupling protein 4 (UCP 4) (Solute carrier family 25 member 27) [MASS=36064]                                                                                                                           | 0.99           | 9.91  | 1.11 | 0.00 | 1 | 2 | 2 | FLLSGC[330]AATVAELATFPLDLTK         | 1 |
|                                                                                                                                                                                                                                            |                |       |      |      |   |   | 2 | VQM[147]QM[147]EGKRK                | 1 |
| UCRH_HUMAN (P07919) Ubiquinol-cytochrome c reductase complex 11 kDa protein, mitochondrial precursor (EC 1.10.2.2) (Mitochondrial hinge protein) (Cytochrome C1, nonheme 11 kDa protein) (Complex III subunit VIII) [MASS=10739]           | 1.00           | 37.36 | 0.95 | 0.16 | 9 | 3 | 2 | LELC[330]DER                        | 1 |
|                                                                                                                                                                                                                                            |                |       |      |      |   |   | 2 | SHTEEDC[339]TEELFDFLHAR             | 1 |
|                                                                                                                                                                                                                                            |                |       |      |      |   |   | 2 | LELC[339]DER                        | 1 |
|                                                                                                                                                                                                                                            |                |       |      |      |   |   | 3 | SHTEEDC[339]TEELFDFLHAR             | 1 |
|                                                                                                                                                                                                                                            |                |       |      |      |   |   | 2 | ERLELC[330]DER                      | 1 |
| 2                                                                                                                                                                                                                                          | ERLELC[339]DER | 2     |      |      |   |   |   |                                     |   |
| UGPA1_HUMAN (Q07131) UTP--glucose-1-phosphate uridylyltransferase 1 (EC 2.7.7.9) (UDP-glucose pyrophosphorylase 1) (UDPGP 1) (UGPase 1) [MASS=56818]                                                                                       | 0.00           | 3.75  | 0.29 | 0.00 | 1 | 2 | 2 | LNGGLGTSMGC[330]JK                  | 2 |
|                                                                                                                                                                                                                                            |                |       |      |      |   |   | 1 | KDLGFR                              | 1 |

|                                                                                                                                                                                                                        |      |       |      |      |   |   |   |                                         |   |
|------------------------------------------------------------------------------------------------------------------------------------------------------------------------------------------------------------------------|------|-------|------|------|---|---|---|-----------------------------------------|---|
| ULK2_HUMAN (Q8IYT8) Serine/threonine-protein kinase ULK2 (EC 2.7.11.1) (Unc-51-like kinase 2) [MASS=112726]                                                                                                            | 0.00 | 3.19  | 5.47 | 0.00 | 1 | 3 | 3 | EC[339]AHC[339]LLVQGSESRQRAEQQSK        | 1 |
|                                                                                                                                                                                                                        |      |       |      |      |   |   | 1 | HLGSSPR                                 | 1 |
|                                                                                                                                                                                                                        |      |       |      |      |   |   | 1 | KLTEK                                   | 1 |
| UQCR1_HUMAN (P31930) Ubiquinol-cytochrome-c reductase complex core protein I, mitochondrial precursor (EC 1.10.2.2) [MASS=52645]                                                                                       | 1.00 | 11.25 | 1.20 | 0.05 | 4 | 3 | 3 | NALVSHLDGTTTPVC[339]EDIGR               | 1 |
|                                                                                                                                                                                                                        |      |       |      |      |   |   | 2 | NALVSHLDGTTTPVC[339]EDIGR               | 1 |
|                                                                                                                                                                                                                        |      |       |      |      |   |   | 2 | LC[339]TSATESEVAR                       | 2 |
|                                                                                                                                                                                                                        |      |       |      |      |   |   | 3 | YIYDQC[330]PAVAGYGPIEQLPDYNR            | 1 |
| UQCR2_HUMAN (P22695) Ubiquinol-cytochrome-c reductase complex core protein 2, mitochondrial precursor (EC 1.10.2.2) (Complex III subunit II) [MASS=48443]                                                              | 1.00 | 2.87  | 1.06 | 0.00 | 2 | 1 | 2 | NALANPLYC[330]PDYR                      | 1 |
|                                                                                                                                                                                                                        |      |       |      |      |   |   | 2 | NALANPLYC[339]PDYR                      | 1 |
| URP1_HUMAN (Q9BQL6) Unc-112-related protein 1 (Kindlin-1) (Kindlerin) (Kindlin syndrome protein) [MASS=77436]                                                                                                          | 0.00 | 6.65  | 1.97 | 0.00 | 1 | 2 | 3 | GKTM[147]ADSSYQPEVLNLSFLR               | 1 |
|                                                                                                                                                                                                                        |      |       |      |      |   |   | 3 | NSASQVASSLENM[147]DM[147]NPEC[339]FVSPR | 1 |
| VATA1_HUMAN (P38606) Vacuolar ATP synthase catalytic subunit A, ubiquitous isoform (EC 3.6.3.14) (V-ATPase subunit A 1) (Vacuolar proton pump alpha subunit 1) (V-ATPase 69 kDa subunit 1) (Isoform VA68) [MASS=68304] | 0.90 | 4.38  | 1.17 | 0.00 | 1 | 2 | 3 | YMRALDEYYDKHFTEFVPLR                    | 1 |
|                                                                                                                                                                                                                        |      |       |      |      |   |   | 1 | C[339]LGNPER                            | 1 |
| VATB1_HUMAN (P15313) Vacuolar ATP synthase subunit B, kidney isoform (EC 3.6.3.14) (V-ATPase B1 subunit) (Vacuolar proton pump B isoform 1) (Endomembrane proton pump 58 kDa subunit) [MASS=56980]                     | 0.00 | 6.04  | *    | *    | * | 2 | 3 | IPIFSAAGLPHNEIAAQIC[339]R               | 1 |
|                                                                                                                                                                                                                        |      |       |      |      |   |   | 3 | IPIFSAAGLPHNEIAAQIC[330]R               | 1 |
|                                                                                                                                                                                                                        |      |       |      |      |   |   | 2 | VFNGSGKPDK                              | 1 |
| VATB2_HUMAN (P21281) Vacuolar ATP synthase subunit B, brain isoform (EC 3.6.3.14) (V-ATPase B2 subunit) (Vacuolar proton pump B isoform 2) (Endomembrane proton pump 58 kDa subunit) (HO57) [MASS=56500]               | 1.00 | 2.35  | 0.93 | 0.07 | 3 | 1 | 2 | KTSC[339]EFTGDILR                       | 1 |
| VAV2_HUMAN (P52735) Protein vav-2 [MASS=101256]                                                                                                                                                                        | *    | 1.48  | *    | *    | * | 1 | 2 | YMQKMG[M147]TEDDKR                      | 1 |

|                                                                                                                                                                                                                                                                             |      |       |      |      |   |   |   |                                            |                   |   |
|-----------------------------------------------------------------------------------------------------------------------------------------------------------------------------------------------------------------------------------------------------------------------------|------|-------|------|------|---|---|---|--------------------------------------------|-------------------|---|
|                                                                                                                                                                                                                                                                             |      |       |      |      |   |   |   | 2                                          | YQIDPDAC[339]FSAK | 4 |
| VDAC1_HUMAN (P21796) Voltage-dependent anion-selective channel protein 1 (VDAC-1) (hVDAC1) (Outer mitochondrial membrane protein porin 1) (Plasmalemmal porin) (Porin 31HL) (Porin 31HM) [MASS=30641]                                                                       | 1.00 | 10.99 | 1.03 | 0.12 | 8 | 2 | 3 | EHINLGC[330]DMDFDIAGPSIR                   | 1                 |   |
|                                                                                                                                                                                                                                                                             |      |       |      |      |   |   | 2 | EHINLGC[330]DM[147]DFDIAGPSIR              | 1                 |   |
|                                                                                                                                                                                                                                                                             |      |       |      |      |   |   | 2 | YQIDPDAC[330]FSAK                          | 1                 |   |
|                                                                                                                                                                                                                                                                             |      |       |      |      |   |   | 2 | EHINLGC[339]DM[147]DFDIAGPSIR              | 1                 |   |
|                                                                                                                                                                                                                                                                             |      |       |      |      |   |   | 2 | YKWC[330]EYGLTFTEK                         | 1                 |   |
|                                                                                                                                                                                                                                                                             |      |       |      |      |   |   | 2 | SC[330]SGVEFSTSGSSNTDTGK                   | 1                 |   |
|                                                                                                                                                                                                                                                                             |      |       |      |      |   |   | 2 | WC[339]EYGLTFTEK                           | 2                 |   |
| VDAC2_HUMAN (P45880) Voltage-dependent anion-selective channel protein 2 (VDAC-2) (hVDAC2) (Outer mitochondrial membrane protein porin 2) [MASS=38092]                                                                                                                      | 1.00 | 12.39 | 1.06 | 0.17 | 7 | 3 | 2 | WC[330]EYGLTFTEK                           | 3                 |   |
| VDAC3_HUMAN (Q9Y277) Voltage-dependent anion-selective channel protein 3 (VDAC-3) (hVDAC3) (Outer mitochondrial membrane protein porin 3) [MASS=30658]                                                                                                                      | 0.99 | 8.83  | 1.45 | 0.09 | 2 | 2 | 2 | GYGFGMVKIDLKTK                             | 1                 |   |
|                                                                                                                                                                                                                                                                             |      |       |      |      |   |   | 2 | VC[339]NYGLTFTQK                           | 2                 |   |
| VGLL2_HUMAN (Q8N8G2) Transcription cofactor vestigial-like protein 2 (Vgl-2) (Protein VITO1) [MASS=33426]                                                                                                                                                                   | 0.00 | 5.99  | 0.75 | 0.00 | 1 | 1 | 2 | LATAPAPAGSPPC[330]ELSGK                    | 1                 |   |
| VISL1_HUMAN (P62760) Visinin-like protein 1 (VILIP) (Hippocalcin-like protein 3) (HLP3) [MASS=22011]                                                                                                                                                                        | 0.94 | 5.26  | 1.14 | 0.00 | 1 | 1 | 2 | GFLKDC[330]PSGR                            | 1                 |   |
| VPP1_HUMAN (Q93050) Vacuolar proton translocating ATPase 116 kDa subunit a isoform 1 (V-ATPase 116 kDa isoform a1) (Clathrin-coated vesicle/synaptic vesicle proton pump 116 kDa subunit) (Vacuolar proton pump subunit 1) (Vacuolar adenosine triphosphatase [MASS=96412]) | 0.95 | 3.35  | 0.86 | 0.00 | 1 | 1 | 3 | SEEM[147]TLAQLFLQSEAYC[330]C[330]VSELGELGK | 1                 |   |
| VWF_HUMAN (P04275) Von Willebrand factor precursor (vWF) [Contains: Von Willebrand antigen II] [MASS=309298]                                                                                                                                                                | 0.00 | 3.91  | 2.08 | 0.00 | 1 | 5 | 3 | AVVILVTDVSVDSVDAADAARSNRVTVFPIGDR          | 1                 |   |
|                                                                                                                                                                                                                                                                             |      |       |      |      |   |   | 3 | QHSDPC[330]ALNPRM[147]TR                   | 1                 |   |
|                                                                                                                                                                                                                                                                             |      |       |      |      |   |   | 3 | PC[330]EDSC[330]RSGFTYVLHEGEC[330]C[339]GR | 1                 |   |
|                                                                                                                                                                                                                                                                             |      |       |      |      |   |   | 3 | LVSVPYVGGNMEVNVYGAIM[147]HEVR              | 1                 |   |
|                                                                                                                                                                                                                                                                             |      |       |      |      |   |   | 2 | C[339]LPSAC[339]EVVTGSPR                   | 1                 |   |
| WDR19_HUMAN (Q8NEZ3) WD repeat protein 19 [MASS=151580]                                                                                                                                                                                                                     | *    | 1.56  | *    | *    | * | 1 | 2 | DC[330]GAILENM[147]KQFSEAAQLYEK            | 1                 |   |
| WDR6_HUMAN (Q9NNW5) WD repeat protein 6 [MASS=121724]                                                                                                                                                                                                                       | 0.00 | 1.34  | 0.96 | 0.00 | 1 | 1 | 2 | C[330]ALGGQGLEVYNWYD                       | 1                 |   |

|                                                                                                                                                                                                                                 |      |      |      |      |   |   |        |                                                            |        |
|---------------------------------------------------------------------------------------------------------------------------------------------------------------------------------------------------------------------------------|------|------|------|------|---|---|--------|------------------------------------------------------------|--------|
| WISP3_HUMAN (O95389) WNT1-inducible signaling pathway protein 3 precursor (WISP-3) [MASS=39293]                                                                                                                                 | *    | 3.95 | *    | *    | * | 1 | 3      | KQFC[330]HWPC[339]KC[339]PQQK                              | 1      |
| WWC3_HUMAN (Q9ULE0) WWC family member 3 [MASS=114908]                                                                                                                                                                           | 0.00 | 3.69 | 0.87 | 0.00 | 1 | 2 | 3<br>2 | RISAC[339]LSDYSLASDSGVFEPLTK<br>RDLM[147]HSLAKLTDSFK       | 1<br>1 |
| XDH_HUMAN (P47989) Xanthine dehydrogenase/oxidase [Includes: Xanthine dehydrogenase (EC 1.17.1.4) (XD); Xanthine oxidase (EC 1.17.3.2) (XO) (Xanthine oxidoreductase)] [MASS=146292]                                            | *    | 1.43 | *    | *    | * | 1 | 3      | DGGC[339]C[339]GGDGNPNC[330]C[339]M[147]NQK                | 1      |
| XPP2_HUMAN (O43895) Xaa-Pro aminopeptidase 2 precursor (EC 3.4.11.9) (X-Pro aminopeptidase 2) (Membrane-bound aminopeptidase P) (Membrane-bound APP) (Membrane-bound AmP) (mAmP) (Aminoacylproline aminopeptidase) [MASS=75624] | *    | 4.45 | *    | *    | * | 1 | 3      | GEEQFSSGSPFETISASGLNAALAHYSPTK                             | 1      |
| YLPM1_HUMAN (P49750) YLP motif-containing protein 1 (Nuclear protein ZAP3) (ZAP113) [MASS=219984]                                                                                                                               | 0.00 | 1.03 | 1.35 | 0.00 | 1 | 1 | 3      | TKGFEVYLAEMSADNQTC[339]GK                                  | 1      |
| ZBT40_HUMAN (Q9NUA8) Zinc finger and BTB domain-containing protein 40 [MASS=138118]                                                                                                                                             | *    | 2.82 | *    | *    | * | 2 | 3<br>3 | AC[339]DKSFHFYC[339]RLK<br>EM[147]IVKC[330]FEGEGGHSFQRILGK | 1<br>1 |
| ZBTB8_HUMAN (Q8NAP8) Zinc finger and BTB domain-containing protein 8 [MASS=55562]                                                                                                                                               | 0.00 | 2.93 | 1.51 | 0.00 | 1 | 1 | 2      | C[339]PFC[339]PYTAKQKGILK                                  | 1      |
| ZFP14_HUMAN (Q9HCL3) Zinc finger protein 14 homolog (Zfp-14) [MASS=63463]                                                                                                                                                       | *    | 2.63 | *    | *    | * | 1 | 3      | STLSQHLRIHTGEK                                             | 1      |
| ZFP1_HUMAN (Q6P2D0) Zinc finger protein 1 homolog (Zfp-1) [MASS=47516]                                                                                                                                                          | *    | 5.16 | *    | *    | * | 1 | 3      | SYAGKQTDEC[330]NEFGKALLYLK                                 | 1      |
| ZFY28_HUMAN (Q9HCC9) Zinc finger FYVE domain-containing protein 28 [MASS=96500]                                                                                                                                                 | *    | 0.56 | *    | *    | * | 1 | 1      | KDPQR                                                      | 1      |
| ZFYV1_HUMAN (Q9HBF4) Zinc finger FYVE domain-containing protein 1 (Double FYVE-containing protein 1) (Tandem FYVE fingers-1) (SR3) [MASS=87175]                                                                                 | *    | 1.16 | *    | *    | * | 1 | 3      | QERLRNHER                                                  | 2      |

|                                                                                                                                                                                                                                                                             |      |      |      |      |   |   |   |                                                                                                                        |                  |
|-----------------------------------------------------------------------------------------------------------------------------------------------------------------------------------------------------------------------------------------------------------------------------|------|------|------|------|---|---|---|------------------------------------------------------------------------------------------------------------------------|------------------|
| ZFYV9_HUMAN (O95405) Zinc finger FYVE domain-containing protein 9 (Mothers against decapentaplegic homolog-interacting protein) (Madh-interacting protein) (Smad anchor for receptor activation) (Receptor activation anchor) (hSARA) (Novel serine protease) [MASS=156402] | 0.00 | 3.93 | 0.85 | 0.00 | 1 | 2 | 3 | DDGSIGRDPSPM[147]SAITSLTVDSVISSQGTDCG[330]PAVK<br>GMHAVGQSEIVILLQC[339]LPDEK                                           | 1<br>1           |
| ZMY11_HUMAN (Q15326) Zinc finger MYND domain-containing protein 11 (Adenovirus 5 E1A-binding protein) (BS69 protein) [MASS=66203]                                                                                                                                           | 0.00 | 6.23 | 0.15 | 0.00 | 1 | 3 | 2 | QLSLAVKDGIVETLTVGC[339]K<br>C[330]LSDEFR<br>EDNQVDVR                                                                   | 1<br>1<br>1      |
| ZMYM3_HUMAN (Q14202) Zinc finger MYM-type protein 3 (Zinc finger protein 261) (DXS6673E protein) [MASS=152378]                                                                                                                                                              | 0.47 | 0.73 | 0.19 | 0.00 | 1 | 1 | 2 | RLVLSESC[330]SR                                                                                                        | 1                |
| ZN236_HUMAN (Q9UL36) Zinc finger protein 236 [MASS=203659]                                                                                                                                                                                                                  | 0.00 | 3.41 | 5.49 | 0.00 | 1 | 4 | 1 | HMATHM[147]SMK<br>3 LHTGVRPFAC[339]PHC[339]DK<br>3 SRPEVITFTEETAQLAK<br>3 VHSEVKNGPTYNC[330]TEC[330]SC[330]VFK         | 1<br>1<br>1<br>1 |
| ZN256_HUMAN (Q9Y2P7) Zinc finger protein 256 (Bone marrow zinc finger 3) (BMZF-3) [MASS=54872]                                                                                                                                                                              | *    | 5.27 | *    | *    | * | 1 | 3 | VHTGTRPYM[147]C[339]SEC[330]GKSFSQSC[330]HLIK                                                                          | 1                |
| ZN263_HUMAN (O14978) Zinc finger protein 263 (Zinc finger protein FPM315) [MASS=77298]                                                                                                                                                                                      | *    | 3.37 | *    | *    | * | 1 | 3 | IHTGEKPYTC[339]HEC[330]GDSFSHSSNR                                                                                      | 1                |
| ZN285_HUMAN (Q96NJ3) Zinc finger protein 285 [MASS=50042]                                                                                                                                                                                                                   | 0.00 | 2.99 | 0.68 | 0.00 | 1 | 1 | 2 | SLLC[330]IHQGVHTGK                                                                                                     | 1                |
| ZN397_HUMAN (Q8NF99) Zinc finger protein 397 (Zinc finger and SCAN domain-containing protein 15) [MASS=61139]                                                                                                                                                               | 0.00 | 1.69 | 1.17 | 0.00 | 1 | 1 | 2 | IHTGEKAC[330]K<br>2 IHTGEKAC[339]K                                                                                     | 1<br>1           |
| ZN407_HUMAN (Q9C0G0) Zinc finger protein 407 (Fragment) [MASS=126979]                                                                                                                                                                                                       | *    | 3.09 | *    | *    | * | 2 | 3 | M[147]YNC[330]PKC[330]DYGTNPVEFR<br>3 PYRC[339]PWC[330]DYRSNC[339]AENIR<br>3 NFELVGRVNLQLEQM[147]K<br>3 IVSLLSSHSHSSQK | 1<br>1<br>1<br>3 |
| ZN462_HUMAN (Q96JM2) Zinc finger protein 462 [MASS=161529]                                                                                                                                                                                                                  | 0.00 | 3.05 | 1.08 | 0.00 | 1 | 3 | 2 | C[330]ALC[330]AYTNPIR                                                                                                  | 1                |
| ZN471_HUMAN (Q9BX82) Zinc finger protein 471 (EZFIT-related protein 1) [MASS=73009]                                                                                                                                                                                         | *    | 1.76 | *    | *    | * | 1 | 2 | EPWEM[147]TSEMTR                                                                                                       | 1                |
| ZN518_HUMAN (Q6AHZ1) Zinc finger protein 518 [MASS=166781]                                                                                                                                                                                                                  | *    | 0.81 | *    | *    | * | 1 | 3 | MSAKILNFSC[339]LK                                                                                                      | 1                |



|                                                                                                                                                                                                      |      |      |      |      |   |   |   |                                  |   |
|------------------------------------------------------------------------------------------------------------------------------------------------------------------------------------------------------|------|------|------|------|---|---|---|----------------------------------|---|
| ZN540_HUMAN (Q8NDQ6) Zinc finger protein 540 [MASS=77093]                                                                                                                                            | 0.00 | 3.64 | 0.25 | 0.00 | 1 | 2 | 3 | TIHTGIKPFAC[330]K                | 1 |
|                                                                                                                                                                                                      |      |      |      |      |   |   | 3 | EPC[339]VWARDVTGR                | 5 |
| ZN577_HUMAN (Q9BSK1) Zinc finger protein 577 [MASS=54156]                                                                                                                                            | *    | 3.35 | *    | *    | * | 1 | 3 | DSDAFGGYGRSC[330]LHIK            | 1 |
| ZN638_HUMAN (Q14966) Zinc finger protein 638 (Nuclear protein 220) (Zinc-finger matrin-like protein) (Cutaneous T-cell lymphoma-associated antigen se33-1) (CTCL tumor antigen se33-1) [MASS=220623] | *    | 1.72 | *    | *    | * | 3 | 3 | ISALQGKLSKLDYR                   | 1 |
|                                                                                                                                                                                                      |      |      |      |      |   |   | 1 | QKHLEAADK                        | 1 |
|                                                                                                                                                                                                      |      |      |      |      |   |   | 2 | KEKEQNEAEER                      | 1 |
| ZN690_HUMAN (Q8IWY8) Zinc finger protein 690 [MASS=96587]                                                                                                                                            | *    | 2.47 | *    | *    | * | 2 | 2 | EPGRPRSSVTVSVK                   | 1 |
|                                                                                                                                                                                                      |      |      |      |      |   |   | 2 | GNESDC[330]R                     | 1 |
| ZNF76_HUMAN (P36508) Zinc finger protein 76 [MASS=61830]                                                                                                                                             | *    | 3.33 | *    | *    | * | 2 | 3 | VHERAHTGDRPYR                    | 1 |
|                                                                                                                                                                                                      |      |      |      |      |   |   | 1 | AHTGDR                           | 1 |
| ZNT3_HUMAN (Q99726) Zinc transporter 3 (ZnT-3) (Solute carrier family 30 member 3) [MASS=41944]                                                                                                      | 0.00 | 6.96 | 0.30 | 0.00 | 1 | 1 | 3 | AADPISTFLFSIC[330]ALGSTAPTLRDVLR | 1 |

## Table 13. LAD Mitochondrial Study

### Experiment 3

A = Protein Score

B = Percent Coverage

C = XPress H2L Ratio

D = XPress Std. Dev.

E = XPress Peptides

F = Unique Peptides

G = Charge

H = Instances

| Description                                                                                                                                                                                                                                   | A    | B     | C    | D    | E | F | G | Peptide Sequence                                                                        | H           |
|-----------------------------------------------------------------------------------------------------------------------------------------------------------------------------------------------------------------------------------------------|------|-------|------|------|---|---|---|-----------------------------------------------------------------------------------------|-------------|
| 1433F_HUMAN (Q04917) 14-3-3 protein eta (Protein AS1) [MASS=28087]                                                                                                                                                                            | 0.73 | 11.43 | 0.98 | 0.00 | 1 | 2 | 2 | YDDMASAM[147]K<br>2 ELETVC[330]NDVLSLLDKFLIK                                            | 1<br>1      |
| 1433T_HUMAN (P27348) 14-3-3 protein theta (14-3-3 protein tau) (14-3-3 protein T-cell) (HS1 protein) [MASS=27764]                                                                                                                             | 1.00 | 14.69 | 0.77 | 0.08 | 3 | 2 | 2 | YLAEVAC[330]GDDRK<br>3 SIC[330]TTVLELLDKYLIANATNPESK<br>3 SIC[339]TTVLELLDKYLIANATNPESK | 1<br>1<br>1 |
| 1433Z_HUMAN (P63104) 14-3-3 protein zeta/delta (Protein kinase C inhibitor protein 1) (KCIP-1) [MASS=27745]                                                                                                                                   | *    | 6.53  | *    | *    | * | 1 | 3 | LAEQAERYDDM[147]AAC[339]M[147]K                                                         | 1           |
| 2AAA_HUMAN (P30153) Serine/threonine-protein phosphatase 2A 65 kDa regulatory subunit A alpha isoform (PP2A, subunit A, PR65-alpha isoform) (PP2A, subunit A, R1-alpha isoform) (Medium tumor antigen-associated 61 kDa protein) [MASS=65092] | 0.99 | 3.91  | 1.09 | 0.00 | 1 | 1 | 3 | DNTIEHLLPLFLAQLKDEC[339]PEVR                                                            | 1           |
| 5HT1F_HUMAN (P30939) 5-hydroxytryptamine 1F receptor (5-HT-1F) (Serotonin receptor 1F) [MASS=41709]                                                                                                                                           | 0.00 | 6.28  | 2.26 | 0.00 | 1 | 1 | 3 | KAATTLGLILGAFVIC[339]WLPFFVK                                                            | 1           |
| 5NT1B_HUMAN (Q96P26) Cytosolic 5'-nucleotidase 1B (EC 3.1.3.5) (Cytosolic 5'-nucleotidase IB) (cN1B) (cN-IB) (Autoimmune infertility-related protein) [MASS=68803]                                                                            | *    | 1.64  | *    | *    | * | 1 | 3 | DMAYC[330]DTQLR                                                                         | 1           |
| 5NTC_HUMAN (P49902) Cytosolic purine 5'-nucleotidase (EC 3.1.3.5) (5'-nucleotidase cytosolic II) [MASS=64969]                                                                                                                                 | 0.00 | 3.57  | 0.87 | 0.00 | 1 | 1 | 3 | IKKVTHDMDMC[330]YGMMGSLFR                                                               | 1           |

|                                                                                                                                                                                                                                                                              |      |       |      |      |   |   |   |                                            |   |
|------------------------------------------------------------------------------------------------------------------------------------------------------------------------------------------------------------------------------------------------------------------------------|------|-------|------|------|---|---|---|--------------------------------------------|---|
| AATM_HUMAN (P00505) Aspartate aminotransferase, mitochondrial precursor (EC 2.6.1.1) (Transaminase A) (Glutamate oxaloacetate transaminase 2) [MASS=47475]                                                                                                                   | 1.00 | 13.49 | 1.13 | 0.09 | 6 | 4 | 2 | NLDKEYLPIGGLAEFC[339]K                     | 1 |
|                                                                                                                                                                                                                                                                              |      |       |      |      |   |   | 2 | NLDKEYLPIGGLAEFC[330]K                     | 1 |
|                                                                                                                                                                                                                                                                              |      |       |      |      |   |   | 1 | VGAFTM[147]VC[339]K                        | 1 |
|                                                                                                                                                                                                                                                                              |      |       |      |      |   |   | 3 | NLDKEYLPIGGLAEFC[339]K                     | 1 |
|                                                                                                                                                                                                                                                                              |      |       |      |      |   |   | 2 | TC[339]GFDFTGAVEDISK                       | 1 |
|                                                                                                                                                                                                                                                                              |      |       |      |      |   |   | 2 | TC[330]GFDFTGAVEDISK                       | 1 |
| ABCBB_HUMAN (O95342) Bile salt export pump (ATP-binding cassette sub-family B member 11) [MASS=146392]                                                                                                                                                                       | *    | 1.21  | *    | *    | * | 1 | 3 | KPIIDC[339]M[147]SEDGYKLDR                 | 1 |
|                                                                                                                                                                                                                                                                              |      |       |      |      |   |   |   |                                            |   |
| ACCN1_HUMAN (Q16515) Amiloride-sensitive cation channel 1, neuronal (Amiloride-sensitive brain sodium channel) (Amiloride-sensitive cation channel neuronal 1) (Acid-sensing ion channel 2) (ASIC2) (Brain sodium channel 1) (BNaC1) (BNC1) (Mammalian degener [MASS=57709]) | 0.74 | 3.52  | 3.63 | 0.00 | 1 | 1 | 2 | C[339]YMFNSGEDGKPLLTTVK                    | 1 |
|                                                                                                                                                                                                                                                                              |      |       |      |      |   |   |   |                                            |   |
| ACON_HUMAN (Q99798) Aconitate hydratase, mitochondrial precursor (EC 4.2.1.3) (Citrate hydro-lyase) (Aconitase) [MASS=85425]                                                                                                                                                 | 1.00 | 7.82  | 0.84 | 0.08 | 3 | 4 | 2 | C[339]TTDHISAAGPWLK                        | 1 |
|                                                                                                                                                                                                                                                                              |      |       |      |      |   |   | 2 | VGLIGSC[330]TNSSYEDM[147]GR                | 1 |
|                                                                                                                                                                                                                                                                              |      |       |      |      |   |   | 2 | C[330]TTDHISAAGPWLK                        | 1 |
|                                                                                                                                                                                                                                                                              |      |       |      |      |   |   | 3 | WVIGDENYEGGSSR                             | 1 |
| ACPM_HUMAN (O14561) Acyl carrier protein, mitochondrial precursor (ACP) (NADH-ubiquinone oxidoreductase 9.6 kDa subunit) (Cl-SDAP) [MASS=17417]                                                                                                                              | 1.00 | 21.79 | 1.45 | 0.13 | 3 | 2 | 3 | LMC[330]PQEIVDYIADKKDVYE                   | 1 |
|                                                                                                                                                                                                                                                                              |      |       |      |      |   |   | 3 | LM[147]C[339]PQEIVDYIADKK                  | 1 |
|                                                                                                                                                                                                                                                                              |      |       |      |      |   |   | 3 | LM[147]C[330]PQEIVDYIADKKDVYE              | 1 |
|                                                                                                                                                                                                                                                                              |      |       |      |      |   |   |   |                                            |   |
| ACSL6_HUMAN (Q9UKU0) Long-chain-fatty-acid--CoA ligase 6 (EC 6.2.1.3) (Long-chain acyl-CoA synthetase 6) (LACS 6) [MASS=77680]                                                                                                                                               | *    | 1.00  | *    | *    | * | 1 | 1 | LLSDDM[147]K                               | 1 |
| ACTB_HUMAN (P60709) Actin, cytoplasmic 1 (Beta-actin) [MASS=41736]                                                                                                                                                                                                           | 1.00 | 10.93 | 0.82 | 0.10 | 3 | 3 | 2 | C[339]DVIDIRK                              | 1 |
|                                                                                                                                                                                                                                                                              |      |       |      |      |   |   | 3 | C[330]PEALFQPSFLGMESC[330]GIHETTFSIM[147]K | 1 |
|                                                                                                                                                                                                                                                                              |      |       |      |      |   |   | 2 | C[330]DVIDIR                               | 1 |
| ACTG_HUMAN                                                                                                                                                                                                                                                                   | 1.00 | 4.80  | *    | *    | * | 1 | 3 | M[147]EEEIAALVIDNGSGMC[339]K               | 1 |

|                                                                                                                                                                                                                                                                         |      |       |      |      |   |   |   |                                        |   |
|-------------------------------------------------------------------------------------------------------------------------------------------------------------------------------------------------------------------------------------------------------------------------|------|-------|------|------|---|---|---|----------------------------------------|---|
| ADPPT_HUMAN (Q9NRN7) L-aminoadipate-semialdehyde dehydrogenase-phosphopantetheinyl transferase (EC 2.7.8.-) (4'-phosphopantetheinyl transferase) (Alpha-aminoadipic semialdehyde dehydrogenase-phosphopantetheinyl transferase) (AASD-PPT) (LYS5 ortholog) [MASS=35776] | 0.00 | 7.44  | 0.98 | 0.00 | 1 | 1 | 3 | FC[339]LVPSM[147]EGVRWAFSC[339]GTWLPSR | 1 |
|                                                                                                                                                                                                                                                                         |      |       |      |      |   |   | 2 | YFAGNLASGGAAGATSLC[330]FVYPLDFAR       | 2 |
|                                                                                                                                                                                                                                                                         |      |       |      |      |   |   | 2 | KGADIM[147]YTGTVDC[339]WR              | 1 |
|                                                                                                                                                                                                                                                                         |      |       |      |      |   |   | 2 | EFHGLGDC[339]IHK                       | 1 |
|                                                                                                                                                                                                                                                                         |      |       |      |      |   |   | 1 | EFHGLGDC[339]IHK                       | 1 |
|                                                                                                                                                                                                                                                                         |      |       |      |      |   |   | 2 | YFAGNLASGGAAGATSLC[339]FVYPLDFAR       | 3 |
| ADT1_HUMAN (P12235) ADP/ATP translocase 1 (Adenine nucleotide translocator 1) (ANT 1) (ADP,ATP carrier protein 1) (Solute carrier family 25 member 4) (ADP,ATP carrier protein, heart/skeletal muscle isoform T1) [MASS=32933]                                          | 1.00 | 17.85 | 1.60 | 0.02 | 4 | 3 |   |                                        |   |
|                                                                                                                                                                                                                                                                         |      |       |      |      |   |   | 2 | EFHGLGDC[330]IHK                       | 1 |
|                                                                                                                                                                                                                                                                         |      |       |      |      |   |   | 1 | EFHGLGDC[330]IHK                       | 1 |
|                                                                                                                                                                                                                                                                         |      |       |      |      |   |   | 3 | YFAGNLASGGAAGATSLC[339]FVYPLDFAR       | 2 |
|                                                                                                                                                                                                                                                                         |      |       |      |      |   |   | 3 | YFAGNLASGGAAGATSLC[330]FVYPLDFAR       | 2 |
| ADT2_HUMAN (P05141) ADP/ATP translocase 2 (Adenine nucleotide translocator 2) (ANT 2) (ADP,ATP carrier protein 2) (Solute carrier family 25 member 5) (ADP,ATP carrier protein, fibroblast isoform) [MASS=32764]                                                        | 1.00 | 7.74  | 0.95 | 0.03 | 2 | 2 | 2 | KGTDIM[147]YTGTLDLC[330]WR             | 1 |
|                                                                                                                                                                                                                                                                         |      |       |      |      |   |   | 2 | GLGDC[330]LVK                          | 1 |
| ADT3_HUMAN (P12236) ADP/ATP translocase 3 (Adenine nucleotide translocator 2) (ANT 3) (ADP,ATP carrier protein 3) (Solute carrier family 25 member 6) (ADP,ATP carrier protein, isoform T2) [MASS=32735]                                                                | 0.00 | 6.40  | *    | *    | * | 1 | 2 | LLLQVQHASKQIAADKQYK                    | 1 |
| AFF2_HUMAN (P51816) AF4/FMR2 family member 2 (Fragile X mental retardation 2 protein) (Protein FMR-2) (FMR2P) (Protein Ox19) (Fragile X E mental retardation syndrome protein) [MASS=144739]                                                                            | *    | 2.82  | *    | *    | * | 2 | 2 | DSHNPSTVLASQASGQPNK                    | 1 |
|                                                                                                                                                                                                                                                                         |      |       |      |      |   |   | 2 | DWDLEQQC[330]HYEQDRSALK                | 1 |

|                                                                                                                                                                                                                                                                              |      |       |      |      |   |   |   |                                         |   |
|------------------------------------------------------------------------------------------------------------------------------------------------------------------------------------------------------------------------------------------------------------------------------|------|-------|------|------|---|---|---|-----------------------------------------|---|
| AFG32_HUMAN (Q9Y4W6) AFG3-like protein 2 (EC 3.4.24.-) (Paraplegin-like protein) [MASS=88483]                                                                                                                                                                                | 1.00 | 4.14  | 1.17 | 0.04 | 3 | 2 | 2 | KNAPC[339]ILFIDEIDAVGR                  | 1 |
|                                                                                                                                                                                                                                                                              |      |       |      |      |   |   | 2 | NAPC[339]ILFIDEIDAVGR                   | 1 |
|                                                                                                                                                                                                                                                                              |      |       |      |      |   |   | 2 | NAPC[330]ILFIDEIDAVGR                   | 1 |
| AGRN_HUMAN (O00468) Agrin precursor [MASS=214888]                                                                                                                                                                                                                            | 0.00 | 1.42  | 2.34 | 0.00 | 1 | 1 | 3 | NLEEVEFC[339]VEDKPGTHFTPVPPTPPDAC[339]R | 1 |
| AK1C1_HUMAN (Q04828) Aldo-keto reductase family 1 member C1 (EC 1.1.1.-) (20-alpha-hydroxysteroid dehydrogenase) (EC 1.1.1.149) (20-alpha-HSD) (Trans-1,2-dihydrobenzene-1,2-diol dehydrogenase) (EC 1.3.1.20) (High-affinity hepatic bile acid-binding protei [MASS=36788]  | 0.00 | 5.26  | 0.83 | 0.00 | 1 | 1 | 3 | LWC[330]NSHRPELVRPALER                  | 1 |
| AKAP9_HUMAN (Q99996) A-kinase anchor protein 9 (Protein kinase A-anchoring protein 9) (PRKA9) (A-kinase anchor protein 450 kDa) (AKAP 450) (A-kinase anchor protein 350 kDa) (AKAP 350) (hgAKAP 350) (AKAP 120-like protein) (Protein hyperion) (Protein yotia [MASS=453664] | *    | 1.10  | *    | *    | * | 2 | 3 | MKSSVFDEDKTFVAETLEM[147]GEVVEK          | 1 |
|                                                                                                                                                                                                                                                                              |      |       |      |      |   |   | 3 | MGGQPAFTDLEVITNRPK                      | 1 |
| AL7A1_HUMAN (P49419) Aldehyde dehydrogenase family 7 member A1 (EC 1.2.1.3) (Antiquitin-1) [MASS=55235]                                                                                                                                                                      | 0.24 | 1.76  | 1.42 | 0.00 | 1 | 1 | 2 | STC[339]TINYSK                          | 1 |
| AL9A1_HUMAN (P49189) 4-trimethylaminobutyraldehyde dehydrogenase (EC 1.2.1.47) (TMABADH) (Aldehyde dehydrogenase 9A1) (EC 1.2.1.3) (Aldehyde dehydrogenase E3 isozyme) (Gamma-aminobutyraldehyde dehydrogenase) (EC 1.2.1.19) (R-aminobutyraldehyde dehydrogen [MASS=53802]  | 0.00 | 4.66  | 0.57 | 0.00 | 1 | 1 | 3 | REPLGVC[330]VGIGAWNYPFQIASWK            | 1 |
| ALBU_HUMAN (P02768) Serum albumin precursor [MASS=69366]                                                                                                                                                                                                                     | 0.98 | 2.79  | 0.99 | 0.00 | 1 | 1 | 2 | SLHTLFGDKLC[330]TVATLR                  | 1 |
| ALDH2_HUMAN (P05091) Aldehyde dehydrogenase, mitochondrial precursor (EC 1.2.1.3) (ALDH class 2) (ALDH1) (ALDH-E2) [MASS=56381]                                                                                                                                              | 1.00 | 13.35 | 1.05 | 0.00 | 2 | 3 | 3 | TFPTVNPSTGEVIC[339]QVAEGDKEDVDK         | 1 |
|                                                                                                                                                                                                                                                                              |      |       |      |      |   |   | 3 | GYFIQPTVFGDVQDGMTIAKEEIFGPVM[147]QILK   | 1 |
|                                                                                                                                                                                                                                                                              |      |       |      |      |   |   | 2 | LLC[330]GGGIAADR                        | 1 |
|                                                                                                                                                                                                                                                                              |      |       |      |      |   |   | 2 | LLC[339]GGGIAADR                        | 1 |

|                                                                                                                                                                       |      |       |      |      |   |   |   |                                           |   |
|-----------------------------------------------------------------------------------------------------------------------------------------------------------------------|------|-------|------|------|---|---|---|-------------------------------------------|---|
| ALDOA_HUMAN (P04075) Fructose-bisphosphate aldolase A (EC 4.1.2.13) (Muscle-type aldolase) (Lung cancer antigen NY-LU-1) [MASS=39289]                                 | 0.99 | 11.85 | 1.25 | 0.00 | 1 | 2 | 3 | RLQSIGTENTEENRR                           | 1 |
|                                                                                                                                                                       |      |       |      |      |   |   | 3 | YASIC[339]QQNGIVPIVEPEILPDGDHDLKR         | 1 |
| AN30A_HUMAN (Q9BXX3) Ankyrin repeat domain-containing protein 30A (NY-BR-1 antigen) [MASS=152673]                                                                     | *    | 0.37  | *    | *    | * | 1 | 1 | MEQM[147]K                                | 1 |
| ANGL1_HUMAN (O95841) Angiopoietin-related protein 1 precursor (Angiopoietin-like 1) (Angiopoietin-3) (ANG-3) [MASS=56719]                                             | 0.31 | 2.24  | 0.69 | 0.00 | 1 | 1 | 2 | C[330]AYTFLVPEQR                          | 1 |
| ANK1_HUMAN (P16157) Ankyrin-1 (Erythrocyte ankyrin) (Ankyrin-R) [MASS=206144]                                                                                         | *    | 1.01  | *    | *    | * | 2 | 1 | EIILETTTK                                 | 1 |
|                                                                                                                                                                       |      |       |      |      |   |   | 2 | EPGGSLSFLR                                | 1 |
| ANK2_HUMAN (Q01484) Ankyrin-2 (Brain ankyrin) (Ankyrin-B) (Ankyrin, nonerythroid) [MASS=430341]                                                                       | *    | 1.86  | *    | *    | * | 4 | 3 | PEDLKELGDDSLPSSQFLDGMNYLR                 | 1 |
|                                                                                                                                                                       |      |       |      |      |   |   | 2 | MFDELEQEAKQK                              | 1 |
|                                                                                                                                                                       |      |       |      |      |   |   | 2 | ELMKAFQSGQDPSKHK                          | 1 |
|                                                                                                                                                                       |      |       |      |      |   |   | 3 | HSPVSSTKTERHPPVSPSGK                      | 1 |
| ANK3_HUMAN (Q12955) Ankyrin-3 (ANK-3) (Ankyrin-G) [MASS=480400]                                                                                                       | *    | 2.24  | *    | *    | * | 4 | 3 | STSLKQTTVEETAVEREM[147]PNDVSK             | 1 |
|                                                                                                                                                                       |      |       |      |      |   |   | 3 | STC[330]VTTTTTTATTTTTTTTTTTTSC[339]TVKVRK | 1 |
|                                                                                                                                                                       |      |       |      |      |   |   | 2 | DGKNATTDALTSVLTK                          | 1 |
|                                                                                                                                                                       |      |       |      |      |   |   | 3 | VKEETHITTTTRM[147]VYHSPPGGEGASER          | 1 |
| ANM3_HUMAN (O60678) Protein arginine N-methyltransferase 3 (EC 2.1.1.-) (Heterogeneous nuclear ribonucleoprotein methyltransferase-like protein 3) [MASS=59903]       | 0.00 | 5.65  | 0.93 | 0.00 | 1 | 2 | 3 | IAFWDDVYGFKM[147]SC[330]M[147]KK          | 1 |
|                                                                                                                                                                       |      |       |      |      |   |   | 2 | SEHQFNIDSMVHK                             | 1 |
| ANR50_HUMAN (Q9ULJ7) Ankyrin repeat domain-containing protein 50 [MASS=149588]                                                                                        | *    | 2.69  | *    | *    | * | 2 | 2 | LLVDGLGNTK                                | 1 |
|                                                                                                                                                                       |      |       |      |      |   |   | 3 | SGLLQGYEDKLRDPAVQSLLPGE[339]ER            | 1 |
| ANXA6_HUMAN (P08133) Annexin A6 (Annexin VI) (Lipocortin VI) (P68) (P70) (Protein III) (Chromobindin-20) (67 kDa calelectrin) (Calphobindin-II) (CPB-II) [MASS=75742] | *    | 3.12  | *    | *    | * | 2 | 1 | YELT GK                                   | 1 |
|                                                                                                                                                                       |      |       |      |      |   |   | 3 | C[339]IRSTPEYFAERLFK                      | 1 |
| ANXA7_HUMAN (P20073) Annexin A7 (Annexin VII) (Synexin) [MASS=52739]                                                                                                  | *    | 5.94  | *    | *    | * | 2 | 2 | KAM[147]QGAGTQERVLIEILC[339]TR            | 1 |
|                                                                                                                                                                       |      |       |      |      |   |   | 2 | TSYGKDLIK                                 | 2 |

|                                                                                                                                                                                                                                                                              |      |       |      |      |   |   |   |                                                |   |
|------------------------------------------------------------------------------------------------------------------------------------------------------------------------------------------------------------------------------------------------------------------------------|------|-------|------|------|---|---|---|------------------------------------------------|---|
| AOFA_HUMAN (P21397) Amine oxidase [flavin-containing] A (EC 1.4.3.4) (Monoamine oxidase type A) (MAO-A) [MASS=59681]                                                                                                                                                         | 1.00 | 8.16  | 0.99 | 0.05 | 4 | 3 | 2 | KIC[339]ELYAK                                  | 1 |
|                                                                                                                                                                                                                                                                              |      |       |      |      |   |   | 3 | LNHPVTHVDQSSDNIIEITLNHEHYEC[339]K              | 1 |
|                                                                                                                                                                                                                                                                              |      |       |      |      |   |   | 2 | KIC[330]ELYAK                                  | 1 |
|                                                                                                                                                                                                                                                                              |      |       |      |      |   |   | 1 | IC[339]ELYAK                                   | 1 |
|                                                                                                                                                                                                                                                                              |      |       |      |      |   |   | 2 | IC[339]ELYAK                                   | 1 |
| AOFB_HUMAN (P27338) Amine oxidase [flavin-containing] B (EC 1.4.3.4) (Monoamine oxidase type B) (MAO-B) [MASS=58631]                                                                                                                                                         | 0.90 | 7.32  | 1.35 | 0.00 | 1 | 2 | 3 | SYPFGRGPFPPVWNPITYLDHNNFWRTMDDM[147]GR         | 1 |
|                                                                                                                                                                                                                                                                              |      |       |      |      |   |   | 1 | C[339]IVYYK                                    | 1 |
| AP1B1_HUMAN (Q10567) AP-1 complex subunit beta-1 (Adapter-related protein complex 1 beta-1 subunit) (Beta-adaptin 1) (Adaptor protein complex AP-1 beta-1 subunit) (Golgi adaptor HA1/AP1 adaptin beta subunit) (Clathrin assembly protein complex 1 beta larg [MASS=104606] | *    | 1.58  | *    | *    | * | 1 | 2 | GEIFELKAELNSDKK                                | 1 |
| AP2M1_HUMAN (Q96CW1) AP-2 complex subunit mu-1 (Adaptin mu-1) (AP-2 mu-2 chain) (Clathrin coat assembly protein AP50) (Clathrin coat-associated protein AP50) (Plasma membrane adaptor AP-2 50 kDa protein) (HA2 50 kDa subunit) (Clathrin assembly protein co [MASS=49654]  | 0.22 | 3.45  | 0.68 | 0.00 | 1 | 1 | 2 | QSIAIDDC[339]TFHQ[339]VR                       | 1 |
| APC_HUMAN (P25054) Adenomatous polyposis coli protein (Protein APC) [MASS=311644]                                                                                                                                                                                            | *    | 1.90  | *    | *    | * | 4 | 2 | DNQAKQNVGNGSVPM[147]RTVGLENR                   | 1 |
|                                                                                                                                                                                                                                                                              |      |       |      |      |   |   | 1 | REVPKMK                                        | 1 |
|                                                                                                                                                                                                                                                                              |      |       |      |      |   |   | 2 | NPKDQEALWDMGAVSMLK                             | 1 |
|                                                                                                                                                                                                                                                                              |      |       |      |      |   |   | 1 | SESASK                                         | 1 |
| APOD_HUMAN (P05090) Apolipoprotein D precursor (Apo-D) (ApoD) [MASS=21275]                                                                                                                                                                                                   | 0.89 | 6.35  | 0.82 | 0.00 | 1 | 1 | 2 | KM[147]TVTDQVNC[330]PK                         | 1 |
| AQP9_HUMAN (O43315) Aquaporin-9 (AQP-9) (Small solute channel 1) [MASS=31401]                                                                                                                                                                                                | *    | 12.20 | *    | *    | * | 1 | 3 | NLGAPRGGLEPIAIGLLIIVIASLGLNSGC[339]AM[147]NPAR | 1 |
| AR6P1_HUMAN (Q15041) ARL-6-interacting protein 1 (ADP-ribosylation-like factor 6-interacting protein 1) (Aip-1) [MASS=23363]                                                                                                                                                 | 0.95 | 4.93  | 0.63 | 0.00 | 1 | 1 | 2 | FHEIC[339]SNLVK                                | 1 |
| ARBK1_HUMAN (P25098) Beta-adrenergic receptor kinase 1 (EC 2.7.11.15) (Beta-ARK-1) (G-protein coupled receptor kinase 2) [MASS=79667]                                                                                                                                        | 0.00 | 6.10  | 3.55 | 0.00 | 1 | 3 | 1 | C[330]LDKKR                                    | 1 |
|                                                                                                                                                                                                                                                                              |      |       |      |      |   |   | 2 | PRSPVVELSKVPLVQR                               | 1 |
|                                                                                                                                                                                                                                                                              |      |       |      |      |   |   | 3 | KQVPPDLFQPYIEEIC[339]QNLR                      | 1 |

|                                                                                                                                                                                                                                                                           |      |      |      |      |   |   |             |                                                                    |             |
|---------------------------------------------------------------------------------------------------------------------------------------------------------------------------------------------------------------------------------------------------------------------------|------|------|------|------|---|---|-------------|--------------------------------------------------------------------|-------------|
| ARHG2_HUMAN (Q92974) Rho/Rac guanine nucleotide exchange factor 2 (GEF-H1 protein) (Proliferating cell nucleolar antigen p40) [MASS=101173]                                                                                                                               | *    | 3.25 | *    | *    | * | 2 | 3<br>1      | YTNGHLFTTISVSGMTMC[339]YAC[330]JNK<br>PAVLKR                       | 1<br>1      |
| ARHG4_HUMAN (Q9NR80) Rho guanine nucleotide exchange factor 4 (APC-stimulated guanine nucleotide exchange factor) (Asef) [MASS=75351]                                                                                                                                     | 0.29 | 5.02 | 0.79 | 0.00 | 1 | 2 | 3<br>2      | KTIITSPESLNLPR<br>MIDISLDGFLLLTPVQKIC[330]JK                       | 1<br>1      |
| ARI4A_HUMAN (P29374) AT-rich interactive domain-containing protein 4A (ARID domain-containing protein 4A) (Retinoblastoma-binding protein 1) (RBBP-1) [MASS=142666]                                                                                                       | 0.00 | 3.26 | 2.67 | 0.00 | 1 | 3 | 2<br>3<br>3 | GPLRVGAIVETR<br>LVYHQGGC[339]DNIDSGAVWK<br>TSDC[339]IGSEGM[147]K   | 1<br>1<br>1 |
| ARID2_HUMAN (Q68CP9) AT-rich interactive domain-containing protein 2 (ARID domain-containing protein 2) (BRG1-associated factor 200) (BAF200) [MASS=197390]                                                                                                               | 0.00 | 2.62 | 1.57 | 0.00 | 1 | 3 | 1<br>3<br>2 | APPDER<br>SIDM[147]LVC[330]LVSMDIQMFGPDALAAVK<br>QSYGLSMDFNPNNDYNK | 1<br>1<br>1 |
| ARSE_HUMAN (P51690) Arylsulfatase E precursor (EC 3.1.6.-) (ASE) [MASS=65668]                                                                                                                                                                                             | 0.00 | 2.55 | 9.63 | 0.00 | 1 | 1 | 3           | LTQHISAASLC[339]TPSR                                               | 1           |
| ASCC1_HUMAN (Q8N9N2) Activating signal cointegrator 1 complex subunit 1 (ASC-1 complex subunit p50) (Trip4 complex subunit p50) [MASS=45509]                                                                                                                              | 0.00 | 4.75 | 0.25 | 0.00 | 1 | 1 | 2           | ITLDC[330]QNIYTWKSRHIVGK                                           | 1           |
| ASPG_HUMAN (P20933) N(4)-(beta-N-acetylglucosaminy)-L-asparaginase precursor (EC 3.5.1.26) (Glycosylasparaginase) (Aspartylglucosaminidase) (N4-(N-acetyl-beta-glucosaminy)-L-asparagine amidase) (AGA) [Contains: Glycosylasparaginase alpha chain; Glycosy [MASS=37194] | *    | 5.78 | *    | *    | * | 1 | 3           | TGHIAAGTSTNGIKFKIHGR                                               | 1           |
| AT10B_HUMAN (O94823) Probable phospholipid-transporting ATPase VB (EC 3.6.3.1) [MASS=165390]                                                                                                                                                                              | *    | 2.81 | *    | *    | * | 3 | 2<br>1<br>2 | C[330]WKDVRVGDIFIQMK<br>HRFDK<br>QRSMGHRESSQPPVAFSSSIEK            | 1<br>1<br>1 |
| AT10D_HUMAN (Q9P241) Probable phospholipid-transporting ATPase VD (EC 3.6.3.1) (ATPVD) [MASS=160319]                                                                                                                                                                      | *    | 1.33 | *    | *    | * | 1 | 2           | RMSVVRHPLSNQVVVYTK                                                 | 1           |



|                                                                                                                                                         |                                     |      |      |      |   |   |   |                                   |   |
|---------------------------------------------------------------------------------------------------------------------------------------------------------|-------------------------------------|------|------|------|---|---|---|-----------------------------------|---|
| AT12A_HUMAN (P54707) Potassium-transporting ATPase alpha chain 2 (EC 3.6.3.10) (Proton pump) (Non-gastric H(+)/K(+) ATPase subunit alpha) [MASS=115898] | 0.00                                | 0.86 | *    | *    | * | 1 | 2 | LIIVEGC[339]QR                    | 1 |
| AT1A1_HUMAN (P05023) Sodium/potassium-transporting ATPase alpha-1 chain precursor (EC 3.6.3.9) (Sodium pump 1) (Na+/K+ ATPase 1) [MASS=112895]          | 1.00                                | 4.59 | 0.88 | 0.07 | 3 | 3 | 2 | C[339]SSILLHGK                    | 1 |
|                                                                                                                                                         |                                     |      |      |      |   |   | 2 | AC[330]VVHGSDLK                   | 1 |
|                                                                                                                                                         |                                     |      |      |      |   |   | 3 | MTVAHM[147]WFDNQIHEADTTENQSGVSFDK | 1 |
|                                                                                                                                                         |                                     |      |      |      |   |   | 2 | AC[339]VVHGSDLK                   | 1 |
|                                                                                                                                                         |                                     |      |      |      |   |   | 1 | C[330]SSILLHGK                    | 1 |
| 1                                                                                                                                                       | C[339]SSILLHGK                      | 1    |      |      |   |   |   |                                   |   |
| AT1A2_HUMAN (P50993) Sodium/potassium-transporting ATPase alpha-2 chain precursor (EC 3.6.3.9) (Sodium pump 2) (Na+/K+ ATPase 2) [MASS=112265]          | 1.00                                | 1.27 | 0.78 | 0.00 | 1 | 1 | 1 | VLGFC[330]QLNLP SGK               | 1 |
| AT1A3_HUMAN (P13637) Sodium/potassium-transporting ATPase alpha-3 chain (EC 3.6.3.9) (Sodium pump 3) (Na+/K+ ATPase 3) (Alpha(III)) [MASS=111734]       | 1.00                                | 9.18 | 0.93 | 0.08 | 9 | 7 | 2 | KYNTDC[330]VQGLTHSK               | 1 |
|                                                                                                                                                         |                                     |      |      |      |   |   | 2 | VLGFC[339]HYYP EEQFPK             | 1 |
|                                                                                                                                                         |                                     |      |      |      |   |   | 2 | NITFFSTNC[330]VEGTAR              | 1 |
|                                                                                                                                                         |                                     |      |      |      |   |   | 1 | IISAHGC[339]K                     | 1 |
|                                                                                                                                                         |                                     |      |      |      |   |   | 1 | IISAHGC[330]K                     | 1 |
|                                                                                                                                                         |                                     |      |      |      |   |   | 2 | VLGFC[330]HYYP EEQFPK             | 1 |
|                                                                                                                                                         |                                     |      |      |      |   |   | 3 | SSHTWVALSHIAGLC[330]NR            | 1 |
| 2                                                                                                                                                       | C[339]IELSSGSVK                     | 1    |      |      |   |   |   |                                   |   |
| 2                                                                                                                                                       | SPDC[339]THDNPLETR                  | 1    |      |      |   |   |   |                                   |   |
| AT1A4_HUMAN (Q13733) Sodium/potassium-transporting ATPase alpha-4 chain (EC 3.6.3.9) (Sodium pump 4) (Na+/K+ ATPase 4) [MASS=114166]                    | 0.00                                | 3.98 | *    | *    | * | 2 | 3 | RNSLFQQGM[147]RNK                 | 1 |
| 3                                                                                                                                                       | DONLYLSIVLSVVIVITGC[339]FSYYQEAKSSK | 1    |      |      |   |   |   |                                   |   |
| AT1B1_HUMAN (P05026) Sodium/potassium-transporting ATPase subunit beta-1 (Sodium/potassium-dependent ATPase beta-1 subunit) [MASS=35061]                | 1.00                                | 7.26 | 1.25 | 0.00 | 2 | 2 | 1 | EGKPC[330]IIIK                    | 1 |
|                                                                                                                                                         |                                     |      |      |      |   |   | 2 | YNPNVLPVQC[330]TGK                | 1 |
|                                                                                                                                                         |                                     |      |      |      |   |   | 2 | YNPNVLPVQC[339]TGK                | 1 |
| AT1B2_HUMAN (P14415) Sodium/potassium-transporting ATPase subunit beta-2 (Sodium/potassium-dependent ATPase beta-2 subunit) [MASS=33326]                | 0.00                                | 2.76 | 0.87 | 0.00 | 1 | 1 | 2 | NDVC[339]RPGR                     | 1 |

|                                                                                                                                                                                                                                                                                 |      |       |       |      |   |   |             |                                                                               |             |
|---------------------------------------------------------------------------------------------------------------------------------------------------------------------------------------------------------------------------------------------------------------------------------|------|-------|-------|------|---|---|-------------|-------------------------------------------------------------------------------|-------------|
| AT2A2_HUMAN (P16615)<br>Sarcoplasmic/endoplasmic reticulum calcium ATPase 2 (EC 3.6.3.8) (Calcium pump 2) (SERCA2) (SR Ca(2+)-ATPase 2) (Calcium-transporting ATPase sarcoplasmic reticulum type, slow twitch skeletal muscle isoform) (Endoplasmic reticulum cla [MASS=114756] | 1.00 | 2.69  | 1.01  | 0.03 | 2 | 2 | 2           | NYLEPGKEC[330]VQPATK<br>VSFYQLSHFLQC[339]K                                    | 1<br>1      |
| AT2A3_HUMAN (Q93084)<br>Sarcoplasmic/endoplasmic reticulum calcium ATPase 3 (EC 3.6.3.8) (Calcium pump 3) (SERCA3) (SR Ca(2+)-ATPase 3) [MASS=113977]                                                                                                                           | *    | 1.05  | *     | *    | * | 1 | 2           | EYEPEM[147]GKIVR                                                              | 2           |
| AT2B1_HUMAN (P20020) Plasma membrane calcium-transporting ATPase 1 (EC 3.6.3.8) (PMCA1) (Plasma membrane calcium pump isoform 1) (Plasma membrane calcium ATPase isoform 1) [MASS=138754]                                                                                       | 0.00 | 1.43  | *     | *    | * | 1 | 2           | HLDAC[330]JTM[147]GNATAIC[330]SDK                                             | 1           |
| AT2B4_HUMAN (P23634) Plasma membrane calcium-transporting ATPase 4 (EC 3.6.3.8) (PMCA4) (Plasma membrane calcium pump isoform 4) (Plasma membrane calcium ATPase isoform 4) [MASS=137919]                                                                                       | 1.00 | 1.61  | 1.12  | 0.01 | 2 | 1 | 3           | TEC[339]ALLGFVTDLQDYQAVR                                                      | 1           |
| AT5F1_HUMAN (P24539) ATP synthase B chain, mitochondrial precursor (EC 3.6.3.14) [MASS=28908]                                                                                                                                                                                   | 0.87 | 8.98  | 1.00  | 0.00 | 1 | 2 | 2<br>1      | VRYGLIPEEFFQFLYPK<br>C[339]IADLK                                              | 1<br>3      |
| ATAD2_HUMAN (Q6PL18) ATPase family AAA domain-containing protein 2 [MASS=158553]                                                                                                                                                                                                | 0.00 | 2.45  | 0.84  | 0.00 | 1 | 2 | 3<br>2      | TSLIQKMEQEVNFSC[330]SR<br>DIDLIC[339]SNALEYNPDR                               | 1<br>1      |
| ATG9A_HUMAN (Q7Z3C6) Autophagy-related protein 9A (APG9-like 1) [MASS=94466]                                                                                                                                                                                                    | 0.00 | 2.50  | 10.40 | 0.00 | 1 | 1 | 3           | NFTVEVVGVDTC[339]SFAQM[147]DVR                                                | 1           |
| ATM_HUMAN (Q13315) Serine-protein kinase ATM (EC 2.7.11.1) (Ataxia telangiectasia mutated) (A-T, mutated) [MASS=350642]                                                                                                                                                         | 0.00 | 1.60  | 1.50  | 0.00 | 2 | 3 | 2<br>3<br>2 | ANSLM[147]QC[339]AGESITLFK<br>ENLIELMADIC[339]HQVFNEDTR<br>NLEDVVVPTM[147]EIK | 1<br>1<br>1 |
| ATP8_HUMAN (P03928) ATP synthase protein 8 (EC 3.6.3.14) (ATPase subunit 8) (A6L) [MASS=7992]                                                                                                                                                                                   | 0.55 | 16.18 | 1.36  | 0.00 | 1 | 1 | 2<br>1      | IC[330]SLHSLPPQS<br>IC[330]SLHSLPPQS                                          | 1<br>1      |

|                                                                                                                                                                                                    |      |       |      |      |   |   |  |   |                                          |   |
|----------------------------------------------------------------------------------------------------------------------------------------------------------------------------------------------------|------|-------|------|------|---|---|--|---|------------------------------------------|---|
|                                                                                                                                                                                                    |      |       |      |      |   |   |  | 1 | LYC[339]IYVAIGQK                         | 1 |
|                                                                                                                                                                                                    |      |       |      |      |   |   |  | 2 | LYC[339]IYVAIGQK                         | 2 |
| ATPA_HUMAN (P25705) ATP synthase alpha chain, mitochondrial precursor (EC 3.6.3.14) [MASS=59750]                                                                                                   | 1.00 | 7.78  | 1.05 | 0.07 | 9 | 4 |  | 2 | KLYC[330]IYVAIGQK                        | 1 |
|                                                                                                                                                                                                    |      |       |      |      |   |   |  | 2 | KKLYC[339]IYVAIGQK                       | 2 |
|                                                                                                                                                                                                    |      |       |      |      |   |   |  | 1 | LYC[330]IYVAIGQK                         | 1 |
|                                                                                                                                                                                                    |      |       |      |      |   |   |  | 2 | KKLYC[330]IYVAIGQK                       | 1 |
|                                                                                                                                                                                                    |      |       |      |      |   |   |  | 1 | VAAAVVR                                  | 1 |
|                                                                                                                                                                                                    |      |       |      |      |   |   |  | 2 | LYC[330]IYVAIGQK                         | 2 |
| ATPG_HUMAN (P36542) ATP synthase gamma chain, mitochondrial precursor (EC 3.6.3.14) [MASS=32996]                                                                                                   | 1.00 | 4.03  | 1.20 | 0.01 | 4 | 1 |  | 2 | GLC[339]GAIHSSIAK                        | 2 |
|                                                                                                                                                                                                    |      |       |      |      |   |   |  | 2 | GLC[330]GAIHSSIAK                        | 2 |
| ATPO_HUMAN (P48047) ATP synthase O subunit, mitochondrial precursor (EC 3.6.3.14) (Oligomycin sensitivity conferral protein) (OSCP) [MASS=23277]                                                   | 0.99 | 15.49 | 1.01 | 0.00 | 1 | 2 |  | 2 | GEVPC[339]TVTSASPLEEATLSELK              | 1 |
|                                                                                                                                                                                                    |      |       |      |      |   |   |  | 1 | MAAPAVSGLSR                              | 1 |
| ATS14_HUMAN (Q8WXS8) ADAMTS-14 precursor (EC 3.4.24.-) (A disintegrin and metalloproteinase with thrombospondin motifs 14) (ADAM-TS 14) (ADAM-TS14) [MASS=133871]                                  | 0.00 | 5.64  | 1.60 | 0.00 | 1 | 3 |  | 3 | PC[339]LGPMEFYQVC[339]NSEEC[339]PGTYEDFR | 1 |
|                                                                                                                                                                                                    |      |       |      |      |   |   |  | 3 | HSSHLRVARSPHPGGTLWPGR                    | 1 |
|                                                                                                                                                                                                    |      |       |      |      |   |   |  | 3 | EVGSMKADDKC[339]GVC[339]GGDNSHC[330]R    | 1 |
| ATS16_HUMAN (Q8TE57) ADAMTS-16 precursor (EC 3.4.24.-) (A disintegrin and metalloproteinase with thrombospondin motifs 16) (ADAM-TS 16) (ADAM-TS16) [MASS=136187]                                  | *    | 3.10  | *    | *    | * | 3 |  | 3 | PRM[147]HEAC[339]LLQRC[330]HK            | 1 |
|                                                                                                                                                                                                    |      |       |      |      |   |   |  | 3 | NEPC[330]DTLGFAPISGMC[339]SK             | 1 |
|                                                                                                                                                                                                    |      |       |      |      |   |   |  | 1 | C[330]SHLPK                              | 1 |
| ATS5_HUMAN (Q9UNA0) ADAMTS-5 precursor (EC 3.4.24.-) (A disintegrin and metalloproteinase with thrombospondin motifs 5) (ADAM-TS 5) (ADAM-TS5) (Aggrecanase-2) (ADMP-2) (ADAM-TS 11) [MASS=101715] | 0.00 | 2.80  | 0.53 | 0.00 | 1 | 2 |  | 2 | LAVVKVVVLGDKDK                           | 1 |
|                                                                                                                                                                                                    |      |       |      |      |   |   |  | 2 | GC[339]PLSQRPSAFK                        | 1 |
| ATS9_HUMAN (Q9P2N4) ADAMTS-9 precursor (EC 3.4.24.-) (A disintegrin and metalloproteinase with thrombospondin motifs 9) (ADAM-TS 9) (ADAM-TS9) [MASS=216556]                                       | *    | 1.96  | *    | *    | * | 2 |  | 3 | DENGVADESAC[330]ATLPR                    | 1 |
|                                                                                                                                                                                                    |      |       |      |      |   |   |  | 2 | SPQHVM[147]APTLNFYTNPMMWSK               | 1 |

|                                                                                                                                                                                                                                                                              |      |      |      |      |   |   |                                                                                                                                             |                             |   |
|------------------------------------------------------------------------------------------------------------------------------------------------------------------------------------------------------------------------------------------------------------------------------|------|------|------|------|---|---|---------------------------------------------------------------------------------------------------------------------------------------------|-----------------------------|---|
| BAI1_HUMAN (O14514) Brain-specific angiogenesis inhibitor 1 precursor [MASS=173532]                                                                                                                                                                                          | *    | 1.20 | *    | *    | * | 1 | 3                                                                                                                                           | SSFVGDGDIFKKLDSELSR         | 1 |
| BAZ1A_HUMAN (Q9NRL2) Bromodomain adjacent to zinc finger domain protein 1A (ATP-utilizing chromatin assembly and remodeling factor 1) (hACF1) (ATP-dependent chromatin remodelling protein) (Williams syndrome transcription factor-related chromatin remodeli [MASS=178673] | 0.00 | 0.84 | 0.69 | 0.00 | 1 | 1 | 2                                                                                                                                           | LHEIC[330]DDIFAYVK          | 1 |
| BAZ2A_HUMAN (Q9UIF9) Bromodomain adjacent to zinc finger domain 2A (Transcription termination factor I-interacting protein 5) (TTF-I-interacting protein 5) (Tip5) (hWALp3) [MASS=208360]                                                                                    | 0.00 | 2.40 | 0.73 | 0.00 | 1 | 3 | 1 REHFSFSPR<br>2 C[330]FLM[147]AYGVEPALC[339]DRLR<br>3 EDLAYC[330]EHLSDSQEDITWR                                                             | 1<br>1<br>1                 |   |
| BCN1_HUMAN (Q14457) Beclin-1 (Coiled-coil myosin-like BCL2-interacting protein) (Protein GT197) [MASS=51896]                                                                                                                                                                 | *    | 6.00 | *    | *    | * | 1 | 3                                                                                                                                           | MMSTESANSFTLIGEASDGGTMENLSR | 1 |
| BCOR_HUMAN (Q6W2J9) BCoR protein (BCL-6 corepressor) [MASS=192187]                                                                                                                                                                                                           | 0.00 | 4.73 | 6.28 | 0.00 | 1 | 5 | 2 QRHLLHLR<br>3 PSFAAESVGQSAEPPKPSVEPALQQRDFIALR<br>3 C[339]VTTELYADSSQLSR<br>2 YSLNMYK<br>2 PLDLSSKVVVDVASKADHM[147]K                      | 1<br>1<br>1<br>1<br>1       |   |
| BIG1_HUMAN (Q9Y6D6) Brefeldin A-inhibited guanine nucleotide-exchange protein 1 (Brefeldin A-inhibited GEP 1) (p200 ARF-GEP1) (p200 ARF guanine nucleotide exchange factor) [MASS=208708]                                                                                    | 0.00 | 2.16 | 0.71 | 0.00 | 1 | 2 | 3 VGC[330]NPNEVDVAIFAVDSLK<br>2 LSVSSNDTQESGNSSGSPGAK                                                                                       | 1<br>1                      |   |
| BIRC6_HUMAN (Q9NR09) Baculoviral IAP repeat-containing protein 6 (Ubiquitin-conjugating BIR-domain enzyme apollon) [MASS=527606]                                                                                                                                             | 0.00 | 1.64 | 3.81 | 0.00 | 1 | 5 | 3 KASTVHM[147]MLQPILTYM[147]AC[330]GYM[147]GR<br>3 WAMLEQIRNPSPC[330]FK<br>1 EVIHK<br>3 LQVHLSSTC[330]PQIFSEFLK<br>2 IRLHTGLLLVQLC[339]GGER | 1<br>1<br>1<br>1<br>1       |   |
| BKLH5_HUMAN (Q96NJ5) BTB and kelch domain-containing protein 5 [MASS=70352]                                                                                                                                                                                                  | 0.25 | 2.58 | 0.92 | 0.00 | 1 | 1 | 2                                                                                                                                           | SDGILC[339]DITLIAEEQK       | 1 |

|                                                                                                                                                                                                                                         |      |       |      |      |   |   |   |                                  |   |
|-----------------------------------------------------------------------------------------------------------------------------------------------------------------------------------------------------------------------------------------|------|-------|------|------|---|---|---|----------------------------------|---|
| BMP1_HUMAN (P13497) Bone morphogenetic protein 1 precursor (EC 3.4.24.19) (BMP-1) (Procollagen C-proteinase) (PCP) (Mammalian tolloid protein) (mTld) [MASS=111248]                                                                     | *    | 2.84  | *    | *    | * | 2 | 3 | YTSTKFQDTLHSR                    | 1 |
|                                                                                                                                                                                                                                         |      |       |      |      |   |   | 2 | DYGHIQSPNYPDDYR                  | 1 |
| BOC_HUMAN (Q9BWV1) Brother of CDO precursor (Protein BOC) [MASS=121059]                                                                                                                                                                 | 0.00 | 5.66  | 0.23 | 0.00 | 1 | 3 | 3 | PGGTVILGC[330]VVEPPRM[147]NVTWR  | 1 |
|                                                                                                                                                                                                                                         |      |       |      |      |   |   | 2 | GQSLILEC[330]VASGIPPPR           | 1 |
|                                                                                                                                                                                                                                         |      |       |      |      |   |   | 3 | VYERPVAGPYITFTDAVNETIMLK         | 1 |
| BPAEB_HUMAN (Q8WXK8) Bullous pemphigoid antigen 1, isoform 7 (Bullous pemphigoid antigen) (BPA) (Hemidesmosomal plaque protein) (Dystonia musculorum protein) (Dystonin) (Fragment) [MASS=344987]                                       | 0.00 | 0.49  | 3.26 | 0.00 | 1 | 1 | 2 | FC[339]GVNETENEDNTNR             | 1 |
| BR44_HUMAN (O95563) Brain protein 44 [MASS=14279]                                                                                                                                                                                       | 1.00 | 10.24 | 0.97 | 0.00 | 2 | 1 | 2 | WGLVC[330]AGLADM[147]AR          | 1 |
|                                                                                                                                                                                                                                         |      |       |      |      |   |   | 2 | WGLVC[339]AGLADM[147]AR          | 1 |
| BRCA2_HUMAN (P51587) Breast cancer type 2 susceptibility protein (Fanconi anemia group D1 protein) [MASS=384223]                                                                                                                        | *    | 1.23  | *    | *    | * | 2 | 3 | KLSKPQSINTVSAHLQSSVVVSDC[330]K   | 1 |
|                                                                                                                                                                                                                                         |      |       |      |      |   |   | 2 | AFQPPRSC[339]GTKYETPIK           | 1 |
|                                                                                                                                                                                                                                         |      |       |      |      |   |   | 1 | AGLYM[147]K                      | 2 |
| BRD1_HUMAN (O95696) Bromodomain-containing protein 1 (BR140-like protein) [MASS=119519]                                                                                                                                                 | 0.00 | 3.78  | 6.70 | 0.00 | 1 | 3 | 3 | ISIFDPLEIILEDLTAQEMSEC[339]NSNK  | 1 |
|                                                                                                                                                                                                                                         |      |       |      |      |   |   | 2 | RHTLEDR                          | 1 |
| BSN_HUMAN (Q9UPA5) Bassoon protein (Zinc-finger protein 231) [MASS=416365]                                                                                                                                                              | *    | 1.02  | *    | *    | * | 2 | 2 | VGSSMRPLLQAQGLAPSER              | 1 |
|                                                                                                                                                                                                                                         |      |       |      |      |   |   | 3 | VRPPM[147]RSQASEEESPV SPLGR      | 1 |
| BTAF1_HUMAN (O14981) TATA-binding protein-associated factor 172 (EC 3.6.1.-) (ATP-dependent helicase BTAF1) (TBP-associated factor 172) (TAF-172) (TAF(II)170) (B-TFIID transcription factor-associated 170 kDa subunit) [MASS=206886]  | *    | 2.60  | *    | *    | * | 3 | 1 | HGAGTGLR                         | 3 |
|                                                                                                                                                                                                                                         |      |       |      |      |   |   | 3 | AQIADLPAGSSGNILVELDEAQK          | 1 |
|                                                                                                                                                                                                                                         |      |       |      |      |   |   | 2 | GSTSEKDGMMHHTVTKHR               | 1 |
| C1QBP_HUMAN (Q07021) Complement component 1 Q subcomponent-binding protein, mitochondrial precursor (Glycoprotein gC1qBP) (C1qBP) (GC1q-R protein) (Hyaluronan-binding protein 1) (Mitochondrial matrix protein p32) (p33) [MASS=31362] | 0.94 | 9.57  | 1.55 | 0.00 | 1 | 1 | 3 | ALVLDC[339]HYPEDEVGQEDEAESDIFSIR | 1 |
| C1QC_HUMAN (P02747) Complement C1q subcomponent subunit C precursor [MASS=25773]                                                                                                                                                        | 0.00 | 4.08  | 0.61 | 0.00 | 1 | 1 | 2 | VVTFC[330]GHTSK                  | 1 |

|                                                                                                                                                                                                                                                                              |      |      |      |      |   |   |        |                                                                          |        |
|------------------------------------------------------------------------------------------------------------------------------------------------------------------------------------------------------------------------------------------------------------------------------|------|------|------|------|---|---|--------|--------------------------------------------------------------------------|--------|
| C560_HUMAN (Q99643) Succinate dehydrogenase cytochrome b560 subunit, mitochondrial precursor (Integral membrane protein CII-3) (QPs1) (QPs-1) (Succinate dehydrogenase complex subunit C) (Succinate-ubiquinone oxidoreductase cytochrome B large subunit) (CY [MASS=18610]) | 1.00 | 7.69 | 1.93 | 0.00 | 2 | 1 | 2<br>2 | SLC[330]LGPALIHTAK<br>SLC[339]LGPALIHTAK                                 | 1<br>1 |
| CABL2_HUMAN (Q9BTV7) CDK5 and ABL1 enzyme substrate 2 (Interactor with CDK3 2) (Ik3-2) [MASS=52235]                                                                                                                                                                          | *    | 1.67 | *    | *    | * | 1 | 1      | QYDTRNSR                                                                 | 1      |
| CAC1S_HUMAN (Q13698) Voltage-dependent L-type calcium channel subunit alpha-1S (Voltage-gated calcium channel subunit alpha Cav1.1) (Calcium channel, L type, alpha-1 polypeptide, isoform 3, skeletal muscle) [MASS=212163]                                                 | *    | 1.44 | *    | *    | * | 1 | 3      | TVSGDLAAEEELERAMVEAAMEEGIFR                                              | 1      |
| CAD17_HUMAN (Q12864) Cadherin-17 precursor (Liver-intestine-cadherin) (LI-cadherin) (Intestinal peptide-associated transporter HPT-1) [MASS=92148]                                                                                                                           | *    | 3.37 | *    | *    | * | 2 | 3<br>1 | LPMDGLFLIQTYAGMLQLAK<br>YNASSFAK                                         | 1<br>1 |
| CADH5_HUMAN (P33151) Vascular endothelial-cadherin precursor (VE-cadherin) (Cadherin-5) (7B4 antigen) (CD144 antigen) [MASS=87516]                                                                                                                                           | 0.00 | 3.06 | 0.78 | 0.00 | 1 | 2 | 2<br>1 | VC[330]ENAVHGQLVLQISAIDK<br>DITPR                                        | 1<br>1 |
| CALI_HUMAN (Q13939) Calicin [MASS=66555]                                                                                                                                                                                                                                     | *    | 2.72 | *    | *    | * | 1 | 2      | ANC[339]LRYLFLAELFELK                                                    | 1      |
| CALX_HUMAN (P27824) Calnexin precursor (Major histocompatibility complex class I antigen-binding protein p88) (p90) (IP90) [MASS=67568]                                                                                                                                      | 0.98 | 3.55 | 1.18 | 0.00 | 1 | 1 | 3      | C[339]ESAPGC[339]GVWQRPVIDNPNYK                                          | 1      |
| CAND2_HUMAN (O75155) Cullin-associated NEDD8-dissociated protein 2 (Cullin-associated and neddylation-dissociated protein 2) (p120 CAND2) [MASS=122681]                                                                                                                      | 0.00 | 5.18 | 1.32 | 0.00 | 1 | 2 | 3<br>3 | DFRFM[147]ATSDLMSELQKDSIQLDEDSER<br>SPLLPAAGVLAEEGFLQALVGTRPPC[339]VDYAK | 1<br>1 |
| CATA_HUMAN (P04040) Catalase (EC 1.11.1.6) [MASS=59625]                                                                                                                                                                                                                      | 0.00 | 3.04 | 0.95 | 0.00 | 1 | 1 | 3      | LVNANGEAVYC[330]KFHYK                                                    | 1      |
| CATD_HUMAN (P07339) Cathepsin D precursor (EC 3.4.23.5) [Contains: Cathepsin D light chain; Cathepsin D heavy chain] [MASS=44552]                                                                                                                                            | 0.99 | 5.34 | 1.15 | 0.00 | 1 | 2 | 2<br>2 | LLDIAC[330]WIHHK<br>FDGILGMAYPR                                          | 1<br>1 |

|                                                                                                                                                                                                                                                                              |      |       |      |      |   |   |   |                                              |   |
|------------------------------------------------------------------------------------------------------------------------------------------------------------------------------------------------------------------------------------------------------------------------------|------|-------|------|------|---|---|---|----------------------------------------------|---|
| CATS_HUMAN (P25774) Cathepsin S precursor (EC 3.4.22.27) [MASS=37495]                                                                                                                                                                                                        | 0.00 | 10.27 | 1.61 | 0.00 | 1 | 1 | 3 | GC[330]NGGFMTTAFQYIIDNKGIDSDASYPYKAM[147]DQK | 1 |
| CBLN2_HUMAN (Q8IUK8) Cerebellin-2 precursor [MASS=24084]                                                                                                                                                                                                                     | 0.00 | 10.71 | 2.06 | 0.00 | 1 | 1 | 3 | C[339]LVVC[339]DSSPSADGAVTSSLGISVR           | 1 |
| CC020_HUMAN (Q8ND61) Protein C3orf20 [MASS=101268]                                                                                                                                                                                                                           | *    | 2.32  | *    | *    | * | 1 | 2 | LLARISKLLMIC[339]QNAGISVPK                   | 1 |
| CC28B_HUMAN (Q9BUN5) Coiled-coil domain-containing protein 28B [MASS=26904]                                                                                                                                                                                                  | *    | 2.49  | *    | *    | * | 1 | 1 | LQAFGK                                       | 1 |
| CCD22_HUMAN (O60826) Coiled-coil domain-containing protein 22 [MASS=70755]                                                                                                                                                                                                   | 0.00 | 9.41  | 5.11 | 0.00 | 1 | 3 | 3 | EEVYKQLM[147]SELETLPR                        | 1 |
|                                                                                                                                                                                                                                                                              |      |       |      |      |   |   | 3 | TLGVSVFVQAESEC[339]RHSK                      | 1 |
|                                                                                                                                                                                                                                                                              |      |       |      |      |   |   | 3 | C[339]LRVINPAVGSGLSPLLPLAM[147]SARFR         | 1 |
| CCD94_HUMAN (Q9BW85) Coiled-coil domain-containing protein 94 [MASS=37086]                                                                                                                                                                                                   | 0.00 | 7.12  | 1.36 | 0.00 | 1 | 1 | 3 | ADPDC[339]SNGQPQAAPTPGAPQNRK                 | 1 |
| CCNT2_HUMAN (O60583) Cyclin-T2 (CycT2) [MASS=81028]                                                                                                                                                                                                                          | 0.36 | 2.19  | 0.61 | 0.00 | 1 | 1 | 2 | VAHAC[330]LHPLEPLLDTK                        | 1 |
| CD34_HUMAN (P28906) Hematopoietic progenitor cell antigen CD34 precursor [MASS=40716]                                                                                                                                                                                        | 0.00 | 7.53  | 1.60 | 0.00 | 1 | 2 | 1 | GARAGPR                                      | 1 |
|                                                                                                                                                                                                                                                                              |      |       |      |      |   |   | 3 | PQC[339]LLLVLNARTEISSKLQLM[147]K             | 1 |
| CD59_HUMAN (P13987) CD59 glycoprotein precursor (Membrane attack complex inhibition factor) (MACIF) (MAC-inhibitory protein) (MAC-IP) (Protectin) (MEM43 antigen) (Membrane inhibitor of reactive lysis) (MIRL) (20 kDa homologous restriction factor) (HRF-20) [MASS=14177] | 0.96 | 9.38  | 0.94 | 0.01 | 2 | 1 | 2 | LRENELTYYC[330]C[330]K                       | 2 |
| CD5L_HUMAN (O43866) CD5 antigen-like precursor (SP-alpha) (CT-2) (IgM-associated peptide) [MASS=38088]                                                                                                                                                                       | 0.00 | 21.61 | 0.68 | 0.00 | 1 | 4 | 2 | ELGC[330]GAASGTPSGILYEPPAEK                  | 1 |
|                                                                                                                                                                                                                                                                              |      |       |      |      |   |   | 2 | QLGC[339]GRAVLTQKR                           | 1 |
|                                                                                                                                                                                                                                                                              |      |       |      |      |   |   | 2 | EDQVVC[330]KQLGC[330]GK                      | 1 |
|                                                                                                                                                                                                                                                                              |      |       |      |      |   |   | 3 | VEVEQKGQWGTVC[339]DDGWDIKDVAVLC[330]R        | 1 |
| CD81_HUMAN (P60033) CD81 antigen (26 kDa cell surface protein TAPA-1) (Target of the antiproliferative antibody 1) (Tetraspanin-28) (Tspan-28) [MASS=25809]                                                                                                                  | 0.99 | 6.78  | 0.91 | 0.00 | 1 | 1 | 2 | NNLC[339]PSGSNIISNLFK                        | 1 |
| CDC42_HUMAN (P60953) Cell division control protein 42 homolog precursor (G25K GTP-binding protein) [MASS=21310]                                                                                                                                                              | 0.98 | 5.76  | 0.55 | 0.00 | 1 | 1 | 2 | WVPEITHHC[339]PK                             | 1 |

|                                                                                                                                                                                                                                                               |                |       |      |      |   |   |   |                                     |   |
|---------------------------------------------------------------------------------------------------------------------------------------------------------------------------------------------------------------------------------------------------------------|----------------|-------|------|------|---|---|---|-------------------------------------|---|
| CEAM6_HUMAN (P40199) Carcinoembryonic antigen-related cell adhesion molecule 6 precursor (Normal cross-reacting antigen) (Nonspecific crossreacting antigen) (CD66c antigen) [MASS=37237]                                                                     | 0.00           | 8.72  | 0.43 | 0.00 | 1 | 1 | 3 | DAVAFTC[330]EPEVQNTTYLWWVNGQSLPVSPR | 1 |
| CENG1_HUMAN (Q99490) Centaurin-gamma 1 (ARF-GAP with GTP-binding protein-like, ankyrin repeat and pleckstrin homology domains 2) (AGAP-2) (Phosphatidylinositol-3-kinase enhancer) (PIKE) (GTP-binding and GTPase-activating protein 2) (GGAP2) [MASS=124673] | *              | 1.51  | *    | *    | * | 2 | 3 | ARALC[339]ADM[147]K                 | 1 |
|                                                                                                                                                                                                                                                               |                |       |      |      |   |   | 2 | SLDLDDWPR                           | 1 |
| CENPF_HUMAN (P49454) CENP-F kinetochore protein (Centromere protein F) (Mitosis) (AH antigen) [MASS=367592]                                                                                                                                                   | 0.00           | 0.81  | 0.74 | 0.00 | 1 | 2 | 3 | QNAESARC[330]SLEQKIK                | 1 |
|                                                                                                                                                                                                                                                               |                |       |      |      |   |   | 2 | ARLTQELQQAK                         | 1 |
| CEP70_HUMAN (Q8NHQ1) Centrosomal protein of 70 kDa (Cep70 protein) (p10-binding protein) [MASS=69751]                                                                                                                                                         | *              | 3.02  | *    | *    | * | 1 | 2 | KRTEQEETIASLQM[147]EVC[339]R        | 1 |
| CEZ2_HUMAN (Q8TE49) Zinc finger A20 domain-containing protein ? (EC 3.-.-) (Zinc finger protein Cezanne 2) (OTU domain-containing protein 7) [MASS=100676]                                                                                                    | 0.00           | 1.40  | 1.22 | 0.00 | 1 | 1 | 2 | PC[330]LQRQDDIAQEK                  | 1 |
| CGL_HUMAN (P32929) Cystathionine gamma-lyase (EC 4.4.1.1) (Gamma-cystathionase) [MASS=44508]                                                                                                                                                                  | 0.00           | 4.94  | 2.23 | 0.00 | 1 | 1 | 3 | YC[339]LAFASGLAATVTITHLLK           | 1 |
| CH60_HUMAN (P10809) 60 kDa heat shock protein, mitochondrial precursor (Hsp60) (60 kDa chaperonin) (CPN60) (Heat shock protein 60) (HSP-60) (Mitochondrial matrix protein P1) (P60 lymphocyte protein) (HuCHA60) [MASS=61054]                                 | 1.00           | 8.20  | 1.25 | 0.05 | 5 | 3 | 2 | C[339]EFQDAYVLLSEKK                 | 1 |
|                                                                                                                                                                                                                                                               |                |       |      |      |   |   | 2 | C[330]IPALDSLTPANEDQK               | 2 |
|                                                                                                                                                                                                                                                               |                |       |      |      |   |   | 2 | AAVEEGIVLGGGC[339]ALLR              | 1 |
|                                                                                                                                                                                                                                                               |                |       |      |      |   |   | 2 | C[339]IPALDSLTPANEDQK               | 1 |
| CHCH3_HUMAN (Q9NX63) Coiled-coil-helix-coiled-coil-helix domain-containing protein 3 [MASS=26152]                                                                                                                                                             | 1.00           | 29.52 | 0.89 | 0.10 | 6 | 5 | 2 | ERIC[330]SEEER                      | 1 |
|                                                                                                                                                                                                                                                               |                |       |      |      |   |   | 2 | YESHPVC[339]ADLQAK                  | 1 |
|                                                                                                                                                                                                                                                               |                |       |      |      |   |   | 2 | C[339]SALATQYM[147]HC[339]VNHAK     | 1 |
|                                                                                                                                                                                                                                                               |                |       |      |      |   |   | 2 | AAANEQLTRAILRER                     | 1 |
|                                                                                                                                                                                                                                                               |                |       |      |      |   |   | 2 | YESHPVC[330]ADLQAK                  | 1 |
|                                                                                                                                                                                                                                                               |                |       |      |      |   |   | 2 | RYESHPVC[330]ADLQAK                 | 1 |
| 2                                                                                                                                                                                                                                                             | ERIC[339]SEEER | 1     |      |      |   |   |   |                                     |   |



|                                                                                                                                                                                                                                                                  |      |       |      |      |   |   |   |                                                |   |
|------------------------------------------------------------------------------------------------------------------------------------------------------------------------------------------------------------------------------------------------------------------|------|-------|------|------|---|---|---|------------------------------------------------|---|
| CHCH6_HUMAN (Q9BRQ6) Coiled-coil-helix-coiled-coil-helix domain-containing protein 6 [MASS=26458]                                                                                                                                                                | *    | 3.40  | *    | *    | * | 1 | 2 | LARELESR                                       | 1 |
| CHD6_HUMAN (Q8TD26) Chromodomain-helicase-DNA-binding protein 6 (EC 3.6.1.-) (ATP-dependent helicase CHD6) (CHD-6) (Radiation-induced gene B protein) [MASS=305410]                                                                                              | *    | 1.47  | *    | *    | * | 2 | 2 | VIINRLDNIC[339]HVVLK GK                        | 1 |
|                                                                                                                                                                                                                                                                  |      |       |      |      |   |   | 2 | QQADYSLEVPGFGANFSDKPKQR                        | 1 |
| CHX10_HUMAN (P58304) Homeobox protein CHX10 (Ceh-10 homeodomain-containing homolog) [MASS=39410]                                                                                                                                                                 | 0.00 | 5.26  | 2.10 | 0.00 | 1 | 1 | 2 | C[339]WGRSSVM[147]AEYGLYGAMVR                  | 1 |
| CISY_HUMAN (O75390) Citrate synthase, mitochondrial precursor (EC 2.3.3.1) [MASS=51712]                                                                                                                                                                          | 0.95 | 1.50  | 1.39 | 0.00 | 1 | 1 | 1 | LPC[339]VAAK                                   | 2 |
|                                                                                                                                                                                                                                                                  |      |       |      |      |   |   | 1 | KFPFC[339]DGAHTK                               | 1 |
|                                                                                                                                                                                                                                                                  |      |       |      |      |   |   | 2 | KFPFC[339]DGAHTK                               | 1 |
| CJ070_HUMAN (Q9NZ45) Protein C10orf70 [MASS=12199]                                                                                                                                                                                                               | 1.00 | 36.11 | 1.16 | 0.08 | 5 | 3 | 3 | IVHAFDM[147]EDLGDKAVYC[339]R                   | 1 |
|                                                                                                                                                                                                                                                                  |      |       |      |      |   |   | 1 | FPFC[330]DGAHTK                                | 1 |
|                                                                                                                                                                                                                                                                  |      |       |      |      |   |   | 3 | IVHAFDM[147]EDLGDKAVYC[330]R                   | 1 |
| CK002_HUMAN (Q9UID3) Protein C11orf2 (Another new gene 2 protein) [MASS=86042]                                                                                                                                                                                   | 0.00 | 2.05  | 0.78 | 0.00 | 1 | 1 | 2 | EC[339]PLAQLM[147]DSETDM[147]VR                | 1 |
| CL011_HUMAN (Q9NVM9) Protein C12orf11 (Sarcoma antigen NY-SAR-95) [MASS=80225]                                                                                                                                                                                   | 0.00 | 2.27  | 0.22 | 0.00 | 1 | 1 | 2 | SILEDPPSISEGC[330]GGR                          | 1 |
| CLH1_HUMAN (Q00610) Clathrin heavy chain 1 (CLH-17) [MASS=191482]                                                                                                                                                                                                | 1.00 | 1.91  | 1.11 | 0.06 | 2 | 3 | 2 | ENPYDYSR                                       | 1 |
|                                                                                                                                                                                                                                                                  |      |       |      |      |   |   | 2 | YESLELC[330]RPVLQQGR                           | 1 |
|                                                                                                                                                                                                                                                                  |      |       |      |      |   |   | 1 | AHIAQLC[330]EK                                 | 1 |
| CLH2_HUMAN (P53675) Clathrin heavy chain 2 (CLH-22) [MASS=187029]                                                                                                                                                                                                | 0.00 | 1.65  | *    | *    | * | 2 | 3 | RPISAESAIMPASKVIALK                            | 1 |
|                                                                                                                                                                                                                                                                  |      |       |      |      |   |   | 1 | HLIMAVR                                        | 1 |
| CMC1_HUMAN (O75746) Calcium-binding mitochondrial carrier protein Aralar1 (Mitochondrial aspartate glutamate carrier 1) (Solute carrier family 25 member 12) [MASS=74755]                                                                                        | 1.00 | 2.36  | 1.19 | 0.09 | 2 | 1 | 2 | DIPFSAIYFPVYAHC[339]K                          | 1 |
|                                                                                                                                                                                                                                                                  |      |       |      |      |   |   | 2 | DIPFSAIYFPVYAHC[330]K                          | 1 |
| CMGA_HUMAN (P10645) Chromogranin A precursor (CgA) (Pituitary secretory protein I) (SP-I) [Contains: Vasostatin-1 (Vasostatin I); Vasostatin-2 (Vasostatin II); EA-92; ES-43; Pancreastatin; SS-18; WA-8; WE-14; LF-19; AL-11; GV-19; GR-44; ER-37] [MASS=50730] | 0.00 | 13.13 | 0.72 | 0.00 | 1 | 3 | 2 | EDSKEAEKSGEATDGAR                              | 1 |
|                                                                                                                                                                                                                                                                  |      |       |      |      |   |   | 3 | SAAVLALLLC[330]AGQVTALPVNSPM[147]NKGDTVM[147]K | 1 |
|                                                                                                                                                                                                                                                                  |      |       |      |      |   |   | 2 | GLSAEPGWQAK                                    | 1 |

|                                                                                                                                                                                                      |      |       |      |      |    |   |   |                                         |   |
|------------------------------------------------------------------------------------------------------------------------------------------------------------------------------------------------------|------|-------|------|------|----|---|---|-----------------------------------------|---|
| CN094_HUMAN (Q9H6D7) Protein C14orf94<br>[MASS=42400]                                                                                                                                                | 0.00 | 5.79  | 2.58 | 0.00 | 1  | 1 | 3 | KC[339]FTLLC[339]YYDPNSDADSETVK         | 1 |
| CN101_HUMAN (Q9NX78) Protein C14orf101<br>[MASS=79528]                                                                                                                                               | 0.00 | 3.11  | 0.50 | 0.00 | 1  | 1 | 3 | VNLLC[330]GLFGAVAASLLFFTVFR             | 1 |
| CN108_HUMAN (Q9H0R1) Protein C14orf108<br>(Putative HIV-1 infection-related protein)<br>[MASS=54766]                                                                                                 | 0.00 | 6.12  | 2.80 | 0.00 | 1  | 1 | 3 | ILDYTLTGCC[339]YADQHSVQVFASGKPKISAHR    | 1 |
|                                                                                                                                                                                                      |      |       |      |      |    |   | 2 | RPPGVLHC[339]TTK                        | 2 |
|                                                                                                                                                                                                      |      |       |      |      |    |   | 2 | AHITLGC[330]AADVEAVQTGLDLLEILR          | 1 |
|                                                                                                                                                                                                      |      |       |      |      |    |   | 3 | DKPELQFPFLQDEDTVATLLEC[339]K            | 2 |
|                                                                                                                                                                                                      |      |       |      |      |    |   | 2 | RLDEDLAAYC[330]R                        | 1 |
|                                                                                                                                                                                                      |      |       |      |      |    |   | 1 | FC[330]DYGK                             | 1 |
|                                                                                                                                                                                                      |      |       |      |      |    |   | 2 | DKPELQFPFLQDEDTVATLLEC[339]K            | 1 |
|                                                                                                                                                                                                      |      |       |      |      |    |   | 2 | RPPGVLHC[330]TTK                        | 2 |
| CN37_HUMAN (P09543) 2',3'-cyclic-nucleotide<br>3'-phosphodiesterase (EC 3.1.4.37) (CNP)<br>(CNPase) [MASS=47578]                                                                                     | 1.00 | 30.88 | 0.94 | 0.10 | 21 | 9 | 2 | LDC[330]AQLK                            | 1 |
|                                                                                                                                                                                                      |      |       |      |      |    |   | 2 | DKPELQFPFLQDEDTVATLLEC[330]K            | 2 |
|                                                                                                                                                                                                      |      |       |      |      |    |   | 2 | LDEDLAAYC[330]R                         | 1 |
|                                                                                                                                                                                                      |      |       |      |      |    |   | 2 | FC[330]DYGK                             | 1 |
|                                                                                                                                                                                                      |      |       |      |      |    |   | 2 | AHITLGC[339]AADVEAVQTGLDLLEILR          | 1 |
|                                                                                                                                                                                                      |      |       |      |      |    |   | 2 | LDEDLAAYC[339]R                         | 1 |
|                                                                                                                                                                                                      |      |       |      |      |    |   | 1 | FC[339]DYGK                             | 2 |
|                                                                                                                                                                                                      |      |       |      |      |    |   | 2 | M[147]SSSGAKDK                          | 1 |
|                                                                                                                                                                                                      |      |       |      |      |    |   | 3 | AHITLGC[330]AADVEAVQTGLDLLEILR          | 1 |
|                                                                                                                                                                                                      |      |       |      |      |    |   | 3 | AHITLGC[330]AADVEAVQTGLDLLEILRQEK       | 1 |
| CND1_HUMAN (Q15021) Condensin complex<br>subunit 1 (Chromosome condensation-related<br>SMC-associated protein 1) (Chromosome-<br>associated protein D2) (hCAP-D2) (XCAP-D2<br>homolog) [MASS=157168] | 0.00 | 4.14  | 3.00 | 0.00 | 1  | 4 | 1 | TTPILR                                  | 1 |
|                                                                                                                                                                                                      |      |       |      |      |    |   | 2 | LSDADLAGPLQK                            | 1 |
|                                                                                                                                                                                                      |      |       |      |      |    |   | 3 | VPAILMSSM[147]C[339]ILLDHLGGENYMM[147]R | 1 |
|                                                                                                                                                                                                      |      |       |      |      |    |   | 2 | ESTGNMVTGQTVCC[339]KNK                  | 1 |

|                                                                                                                                                                                                                                                                |      |       |      |      |   |   |   |                                              |   |
|----------------------------------------------------------------------------------------------------------------------------------------------------------------------------------------------------------------------------------------------------------------|------|-------|------|------|---|---|---|----------------------------------------------|---|
| CNGB3_HUMAN (Q9NQW8) Cyclic nucleotide-gated cation channel beta 3 (CNG channel beta 3) (Cyclic nucleotide-gated channel beta 3) (Cone photoreceptor cGMP-gated channel subunit beta) (Cyclic nucleotide-gated cation channel modulatory subunit) [MASS=92249] | 0.00 | 2.60  | 1.98 | 0.00 | 1 | 1 | 3 | AC[339]MDDTIAYM[147]NNYSIPKLVQK              | 1 |
| CO2_HUMAN (P06681) Complement C2 precursor (EC 3.4.21.43) (C3/C5 convertase) [Contains: Complement C2b fragment; Complement C2a fragment] [MASS=83267]                                                                                                         | *    | 1.73  | *    | *    | * | 2 | 1 | KRAPR                                        | 1 |
|                                                                                                                                                                                                                                                                |      |       |      |      |   |   | 2 | DFHINLFR                                     | 1 |
| CO3A1_HUMAN (P02461) Collagen alpha-1(III) chain precursor [MASS=138554]                                                                                                                                                                                       | *    | 3.82  | *    | *    | * | 2 | 2 | GLAGPPGMPGPRGSPGPQGVKGESGK                   | 1 |
|                                                                                                                                                                                                                                                                |      |       |      |      |   |   | 3 | GPVGPSPGPPGKDGTSGHPIGPPGPRGNR                | 1 |
|                                                                                                                                                                                                                                                                |      |       |      |      |   |   | 2 | GPIGSIGPK                                    | 2 |
| CO6A3_HUMAN (P12111) Collagen alpha-3(VI) chain precursor [MASS=343550]                                                                                                                                                                                        | 0.00 | 1.67  | 1.34 | 0.00 | 1 | 4 | 2 | VNHFVPEAGSR                                  | 1 |
|                                                                                                                                                                                                                                                                |      |       |      |      |   |   | 2 | PQAAKPAATKPATTK                              | 1 |
|                                                                                                                                                                                                                                                                |      |       |      |      |   |   | 1 | GPIGSIGPK                                    | 1 |
|                                                                                                                                                                                                                                                                |      |       |      |      |   |   | 2 | GPPGVNGTQGFQGC[339]PGQR                      | 1 |
| CO9_HUMAN (P02748) Complement component C9 precursor [Contains: Complement component C9a; Complement component C9b] [MASS=63173]                                                                                                                               | 0.00 | 4.65  | 0.05 | 0.00 | 1 | 2 | 2 | RC[339]TDAVGDR                               | 1 |
|                                                                                                                                                                                                                                                                |      |       |      |      |   |   | 3 | KC[330]HTC[330]QNGGTVILM[147]DGK             | 1 |
| COF1_HUMAN (P23528) Cofilin-1 (Cofilin, non-muscle isoform) (18 kDa phosphoprotein) (p18) [MASS=18371]                                                                                                                                                         | 0.00 | 4.85  | 0.96 | 0.04 | 2 | 1 | 2 | M[147]LPDKDC[330]R                           | 1 |
|                                                                                                                                                                                                                                                                |      |       |      |      |   |   | 2 | MLPDKDC[330]R                                | 1 |
| COPG2_HUMAN (Q9UBF2) Coatomer subunit gamma-2 (Gamma-2 coat protein) (Gamma-2 COP) [MASS=97622]                                                                                                                                                                | 0.00 | 4.02  | 1.62 | 0.00 | 1 | 2 | 3 | HEMVIYEAAASAIHLPNC[339]TAR                   | 1 |
|                                                                                                                                                                                                                                                                |      |       |      |      |   |   | 2 | SQFAYC[339]MLIRIASR                          | 1 |
| COX2_HUMAN (P00403) Cytochrome c oxidase subunit 2 (EC 1.9.3.1) (Cytochrome c oxidase polypeptide II) [MASS=25565]                                                                                                                                             | 0.99 | 12.78 | 1.09 | 0.00 | 1 | 1 | 3 | PGVYYGQC[339]SEIC[339]GANHSFM[147]PIVLELIPLK | 1 |
| COX5B_HUMAN (P10606) Cytochrome c oxidase polypeptide Vb, mitochondrial precursor (EC 1.9.3.1) [MASS=13696]                                                                                                                                                    | 0.95 | 4.65  | 1.38 | 0.00 | 1 | 1 | 1 | C[339]GAHYK                                  | 1 |

|                                                                                                                                                                                                                                                                        |                               |       |      |      |   |   |   |                                     |   |
|------------------------------------------------------------------------------------------------------------------------------------------------------------------------------------------------------------------------------------------------------------------------|-------------------------------|-------|------|------|---|---|---|-------------------------------------|---|
| COX7C_HUMAN (P15954) Cytochrome c oxidase polypeptide VIIc, mitochondrial precursor (EC 1.9.3.1) [MASS=7245]                                                                                                                                                           | 1.00                          | 63.49 | 1.26 | 0.07 | 4 | 2 | 2 | MC[339]LYFGSAFATPFLVVR              | 1 |
|                                                                                                                                                                                                                                                                        |                               |       |      |      |   |   | 2 | M[147]C[339]LYFGSAFATPFLVVR         | 2 |
|                                                                                                                                                                                                                                                                        |                               |       |      |      |   |   | 3 | MC[339]LYFGSAFATPFLVVRHQLLKT        | 1 |
|                                                                                                                                                                                                                                                                        |                               |       |      |      |   |   | 2 | MC[330]LYFGSAFATPFLVVR              | 1 |
| CP27A_HUMAN (Q02318) Cytochrome P450 27, mitochondrial precursor (EC 1.14.13.15) (Cytochrome P-450C27/25) (Sterol 26-hydroxylase) (Sterol 27-hydroxylase) (Vitamin D(3) 25-hydroxylase) (5-beta-cholestane-3-alpha,7-alpha,12-alpha-triol 27-hydroxylase) [MASS=60234] | 0.00                          | 5.27  | 0.89 | 0.00 | 1 | 1 | 3 | IIEKEIEVDGFLFPKNTQFVFC[339]HYVVSR   | 1 |
| CP4X1_HUMAN (Q8N118) Cytochrome P450 4X1 (EC 1.14.14.1) (CYPIVX1) [MASS=58875]                                                                                                                                                                                         | *                             | 9.63  | *    | *    | * | 2 | 3 | IC[330]STQDTSVEVYEHINSM[147]SLDIIMK | 1 |
| 3                                                                                                                                                                                                                                                                      | NC[330]GQEFAMIELKVITIALILLHFR | 1     |      |      |   |   |   |                                     |   |
| CP7A1_HUMAN (P22680) Cytochrome P450 7A1 (Cholesterol 7-alpha-monooxygenase) (CYPVII) (EC 1.14.13.17) (Cholesterol 7-alpha-hydroxylase) [MASS=57660]                                                                                                                   | 0.31                          | 2.58  | 0.23 | 0.00 | 1 | 1 | 3 | KHGHVFTC[330]KLM[147]GK             | 1 |
| CRTC_HUMAN (P27797) Calreticulin precursor (CRP55) (Calregulin) (HACBP) (ERp60) (grp60) [MASS=48141]                                                                                                                                                                   | 0.98                          | 3.12  | 1.35 | 0.00 | 1 | 1 | 2 | HEQNIDC[339]GGGYVK                  | 1 |
| CSKI2_HUMAN (Q8WXE0) Caskin-2 [MASS=126710]                                                                                                                                                                                                                            | *                             | 1.08  | *    | *    | * | 1 | 2 | GTPRSQSFALRAR                       | 1 |
| CSMD1_HUMAN (Q96PZ7) CUB and sushi domain-containing protein 1 precursor (CUB and sushi multiple domains protein 1) [MASS=388867]                                                                                                                                      | *                             | 0.28  | *    | *    | * | 1 | 2 | SRGVKM[147]LPSK                     | 1 |
| CSPG2_HUMAN (P13611) Versican core protein precursor (Large fibroblast proteoglycan) (Chondroitin sulfate proteoglycan core protein 2) (PG-M) (Glial hyaluronate-binding protein) (GHAP) [MASS=372817]                                                                 | 0.90                          | 0.82  | 0.72 | 0.00 | 1 | 2 | 3 | QEIESETTSEEQIREEK                   | 1 |
|                                                                                                                                                                                                                                                                        |                               |       |      |      |   |   | 2 | AQC[339]GGGLLGVR                    | 1 |
| CT012_HUMAN (Q9NVP4) Protein C20orf12 [MASS=62909]                                                                                                                                                                                                                     | *                             | 5.70  | *    | *    | * | 2 | 3 | HHEAIPVLVQRGADIDQQWGPLR             | 1 |
| 2                                                                                                                                                                                                                                                                      | PLLTISPGR                     | 3     |      |      |   |   |   |                                     |   |
| CX020_HUMAN (Q8NDZ0) Protein CXorf20 [MASS=87918]                                                                                                                                                                                                                      | 0.00                          | 3.00  | 0.48 | 0.00 | 1 | 1 | 3 | RTPPC[330]PVAHGDQIVSQINHPVHLR       | 1 |

|                                                                                                                                                                                                                                                                                                      |      |       |      |      |   |   |   |                                      |   |
|------------------------------------------------------------------------------------------------------------------------------------------------------------------------------------------------------------------------------------------------------------------------------------------------------|------|-------|------|------|---|---|---|--------------------------------------|---|
| CX022_HUMAN (Q6ZTR5) Protein CXorf22<br>[MASS=110392]                                                                                                                                                                                                                                                | *    | 2.97  | *    | *    | * | 2 | 3 | LHENYYAM[147]YLKYLRSVR               | 2 |
|                                                                                                                                                                                                                                                                                                      |      |       |      |      |   |   | 2 | DM[147]DSSGRDM[147]QLR               | 1 |
| CX6B1_HUMAN (P14854) Cytochrome c<br>oxidase subunit VIb isoform 1 (EC 1.9.3.1)<br>(COX VIb-1) [MASS=10061]                                                                                                                                                                                          | 1.00 | 58.82 | 1.44 | 0.11 | 5 | 3 | 3 | VYQSLC[339]PTSWVTDWDEQRAEGTFPGKI     | 1 |
|                                                                                                                                                                                                                                                                                                      |      |       |      |      |   |   | 2 | GGDISVC[339]EWYQR                    | 2 |
| CXB4_HUMAN (Q9NTQ9) Gap junction beta-4<br>protein (Connexin-30.3) (Cx30.3)<br>[MASS=30419]                                                                                                                                                                                                          | 0.00 | 3.01  | 1.15 | 0.00 | 1 | 1 | 2 | C[339]MEIFGPR                        | 1 |
|                                                                                                                                                                                                                                                                                                      |      |       |      |      |   |   |   |                                      |   |
| CXX1_HUMAN (O15255) CAAX box protein 1<br>(Cerebral protein 5) [MASS=22278]                                                                                                                                                                                                                          | 0.00 | 14.83 | 6.34 | 0.00 | 1 | 2 | 3 | DLSPSARPISSPPPETSC[339]VLA           | 1 |
|                                                                                                                                                                                                                                                                                                      |      |       |      |      |   |   | 2 | C[330]PLRSC[330]SLPR                 | 1 |
| CY1_HUMAN (P08574) Cytochrome c1, heme<br>protein, mitochondrial precursor (Cytochrome c-<br>1) [MASS=35390]                                                                                                                                                                                         | 1.00 | 20.00 | 1.36 | 0.08 | 4 | 4 | 1 | DVC[339]TFLR                         | 2 |
|                                                                                                                                                                                                                                                                                                      |      |       |      |      |   |   | 2 | HLVGVC[330]YTEDEAK                   | 1 |
| DCBD1_HUMAN (Q8N8Z6) Discoidin, CUB<br>and LCCL domain-containing protein 1<br>precursor [MASS=77920]                                                                                                                                                                                                | 0.00 | 14.13 | 2.82 | 0.00 | 1 | 4 | 2 | HLVGVC[339]YTEDEAK                   | 1 |
|                                                                                                                                                                                                                                                                                                      |      |       |      |      |   |   | 3 | HGGEDYVFSLLTGYC[339]EPPTGVSLR        | 1 |
| DCC_HUMAN (P43146) Netrin receptor DCC<br>precursor (Tumor suppressor protein DCC)<br>(Colorectal cancer suppressor)<br>[MASS=158455]                                                                                                                                                                | *    | 2.07  | *    | *    | * | 2 | 3 | RM[147]GLKMLMMM[147]ALLVPLVYTIK      | 1 |
|                                                                                                                                                                                                                                                                                                      |      |       |      |      |   |   | 1 | DVC[339]TFLR                         | 2 |
| DCXR_HUMAN (Q7Z4W1) L-xylulose<br>reductase (EC 1.1.1.10) (XR) (Dicarbonyl/L-<br>xylulose reductase) (Kidney dicarbonyl<br>reductase) (kiDCR) (Carbonyl reductase II)<br>(Sperm surface protein P34H) [MASS=25913]                                                                                   | 0.32 | 15.98 | 1.15 | 0.00 | 1 | 2 | 3 | PIPSEETSTGINITTVAIPLVLLVLFAGMGIFAAFR | 1 |
|                                                                                                                                                                                                                                                                                                      |      |       |      |      |   |   | 3 | AGRHEYALPLAPPEPEYATPIVER             | 1 |
| DDB1_HUMAN (Q16531) DNA damage-<br>binding protein 1 (Damage-specific DNA-<br>binding protein 1) (UV-damaged DNA-binding<br>factor) (DDB p127 subunit) (DDBa) (UV-<br>damaged DNA-binding protein 1) (UV-DDB 1)<br>(Xeroderma pigmentosum group E-<br>complementing protein) (XPCe)<br>[MASS=126967] | *    | 1.05  | *    | *    | * | 1 | 3 | TTGSTQSNFNFYVKSFVM[147]NFK           | 1 |
|                                                                                                                                                                                                                                                                                                      |      |       |      |      |   |   | 3 | VELIGC[339]QITQGNDSLVWR              | 1 |
| DDB1_HUMAN (Q16531) DNA damage-<br>binding protein 1 (Damage-specific DNA-<br>binding protein 1) (UV-damaged DNA-binding<br>factor) (DDB p127 subunit) (DDBa) (UV-<br>damaged DNA-binding protein 1) (UV-DDB 1)<br>(Xeroderma pigmentosum group E-<br>complementing protein) (XPCe)<br>[MASS=126967] | *    | 1.05  | *    | *    | * | 1 | 3 | GVGPLSDPILFRTLKVEHPDK                | 1 |
|                                                                                                                                                                                                                                                                                                      |      |       |      |      |   |   | 1 | PVPTVNWM[147]K                       | 1 |
| DDB1_HUMAN (Q16531) DNA damage-<br>binding protein 1 (Damage-specific DNA-<br>binding protein 1) (UV-damaged DNA-binding<br>factor) (DDB p127 subunit) (DDBa) (UV-<br>damaged DNA-binding protein 1) (UV-DDB 1)<br>(Xeroderma pigmentosum group E-<br>complementing protein) (XPCe)<br>[MASS=126967] | *    | 1.05  | *    | *    | * | 1 | 2 | AVTNHSVYC[339]STK                    | 1 |
|                                                                                                                                                                                                                                                                                                      |      |       |      |      |   |   | 3 | IRVNAVNPVVVM[147]TSMGQATWSDPHKAK     | 1 |
| DDB1_HUMAN (Q16531) DNA damage-<br>binding protein 1 (Damage-specific DNA-<br>binding protein 1) (UV-damaged DNA-binding<br>factor) (DDB p127 subunit) (DDBa) (UV-<br>damaged DNA-binding protein 1) (UV-DDB 1)<br>(Xeroderma pigmentosum group E-<br>complementing protein) (XPCe)<br>[MASS=126967] | *    | 1.05  | *    | *    | * | 1 | 3 | M[147]IGLRLYDGLFK                    | 1 |
|                                                                                                                                                                                                                                                                                                      |      |       |      |      |   |   |   |                                      |   |

|                                                                                                                                                                            |      |       |      |      |    |   |   |                                        |   |
|----------------------------------------------------------------------------------------------------------------------------------------------------------------------------|------|-------|------|------|----|---|---|----------------------------------------|---|
| DDX31_HUMAN (Q9H8H2) Probable ATP-dependent RNA helicase DDX31 (EC 3.6.1.-) (DEAD box protein 31) (Helicain) [MASS=94086]                                                  | 0.00 | 6.93  | 1.44 | 0.00 | 1  | 2 | 3 | AVQEVC[330]PPPAGDKLDSFAIPESLKQHVTVVPSK | 1 |
|                                                                                                                                                                            |      |       |      |      |    |   | 3 | IGC[339]HGSSLLILAPSEAEYVNSLASHK        | 1 |
| DEPD5_HUMAN (O75140) DEP domain-containing protein 5 [MASS=177909]                                                                                                         | *    | 1.08  | *    | *    | *  | 2 | 3 | TVTLDVDVNNR                            | 1 |
|                                                                                                                                                                            |      |       |      |      |    |   | 1 | VTLKDK                                 | 1 |
| DGCR8_HUMAN (Q8WYQ5) DGCR8 protein (DiGeorge syndrome critical region 8) [MASS=86045]                                                                                      | 0.00 | 1.94  | 1.30 | 0.00 | 1  | 1 | 2 | AGLLSPYQILHEC[339]LK                   | 1 |
| DGKG_HUMAN (P49619) Diacylglycerol kinase gamma (EC 2.7.1.107) (Diglyceride kinase gamma) (DGK-gamma) (DAG kinase gamma) [MASS=88996]                                      | 0.00 | 1.90  | 0.37 | 0.00 | 1  | 1 | 3 | SAGRRLAQC[339]ASVTIR                   | 1 |
| DHC24_HUMAN (Q15392) 24-dehydrocholesterol reductase precursor (EC 1.3.1.-) (3-beta-hydroxysterol delta-24-reductase) (Seladin-1) (Diminuto/dwarf1 homolog) [MASS=60101]   | 0.00 | 3.10  | 0.73 | 0.00 | 1  | 1 | 2 | SVHGFQMLYADC[330]YMNR                  | 1 |
|                                                                                                                                                                            |      |       |      |      |    |   | 2 | AKPYEGSILEADC[339]DILIPAASEK           | 2 |
| DHE3_HUMAN (P00367) Glutamate dehydrogenase 1, mitochondrial precursor (EC 1.4.1.3) (GDH) [MASS=61397]                                                                     | 1.00 | 9.14  | 1.22 | 0.07 | 13 | 3 | 3 | IHKPC[339]NHVLSLSFPIR                  | 1 |
|                                                                                                                                                                            |      |       |      |      |    |   | 3 | IHKPC[330]NHVLSLSFPIR                  | 1 |
|                                                                                                                                                                            |      |       |      |      |    |   | 3 | AKPYEGSILEADC[330]DILIPAASEK           | 1 |
|                                                                                                                                                                            |      |       |      |      |    |   | 2 | IHKPC[339]NHVLSLSFPIR                  | 1 |
|                                                                                                                                                                            |      |       |      |      |    |   | 2 | C[339]AVVDVPPFGGAK                     | 4 |
|                                                                                                                                                                            |      |       |      |      |    |   | 2 | AKPYEGSILEADC[330]DILIPAASEK           | 1 |
|                                                                                                                                                                            |      |       |      |      |    |   | 2 | C[330]AVVDVPPFGGAK                     | 2 |
| DHPR_HUMAN (P09417) Dihydropteridine reductase (EC 1.5.1.34) (HDHPR) (Quinoid dihydropteridine reductase) [MASS=25803]                                                     | 1.00 | 11.89 | 1.45 | 0.01 | 2  | 2 | 3 | AALDGTGPM[147]IGYGM[147]AK             | 1 |
|                                                                                                                                                                            |      |       |      |      |    |   | 2 | GAVHQLC[339]QSLAGK                     | 1 |
|                                                                                                                                                                            |      |       |      |      |    |   | 2 | GAVHQLC[330]QSLAGK                     | 1 |
| DHSA_HUMAN (P31040) Succinate dehydrogenase [ubiquinone] flavoprotein subunit, mitochondrial precursor (EC 1.3.5.1) (Fp) (Flavoprotein subunit of complex II) [MASS=72691] | 1.00 | 5.72  | 1.12 | 0.06 | 2  | 2 | 2 | AAFGLSEAGFNTAC[339]VTK                 | 1 |
|                                                                                                                                                                            |      |       |      |      |    |   | 2 | TYFSC[339]TSAHTSTGDGTAM[147]ITR        | 1 |

|                                                                                                                                                                          |      |       |       |      |   |   |   |                                              |   |
|--------------------------------------------------------------------------------------------------------------------------------------------------------------------------|------|-------|-------|------|---|---|---|----------------------------------------------|---|
| DHSB_HUMAN (P21912) Succinate dehydrogenase [ubiquinone] iron-sulfur protein, mitochondrial precursor (EC 1.3.5.1) (lp) (Iron-sulfur subunit of complex II) [MASS=31630] | 1.00 | 12.86 | 1.38  | 0.02 | 5 | 3 | 3 | TC[339]PKGLNPGKAIAEIK                        | 1 |
|                                                                                                                                                                          |      |       |       |      |   |   | 2 | C[339]GPMVLDALIK                             | 1 |
|                                                                                                                                                                          |      |       |       |      |   |   | 2 | C[330]HTIM[147]NC[330]TR                     | 2 |
|                                                                                                                                                                          |      |       |       |      |   |   | 2 | C[339]HTIM[147]NC[339]TR                     | 2 |
|                                                                                                                                                                          |      |       |       |      |   |   |   |                                              |   |
| DHX8_HUMAN (Q14562) ATP-dependent RNA helicase DHX8 (EC 3.6.1.-) (DEAH box protein 8) (RNA helicase HRH1) [MASS=139314]                                                  | *    | 2.79  | *     | *    | * | 2 | 3 | ELFPVLC[330]QPDNPSVRTMLDEDDVK                | 1 |
|                                                                                                                                                                          |      |       |       |      |   |   | 2 | LIQTM[147]RPPAK                              | 1 |
| DLDH_HUMAN (P09622) Dihydrolipoyl dehydrogenase, mitochondrial precursor (EC 1.8.1.4) (Dihydrolipoamide dehydrogenase) (Glycine cleavage system L protein) [MASS=54150]  | 0.96 | 8.06  | 1.40  | 0.00 | 1 | 3 | 2 | ILQKQGFK                                     | 1 |
|                                                                                                                                                                          |      |       |       |      |   |   | 2 | FPFAANSRAKTNADTDGM[147]VK                    | 1 |
|                                                                                                                                                                          |      |       |       |      |   |   | 2 | VC[339]HAHPTLSEAFR                           | 1 |
| DMXL2_HUMAN (Q8TDJ6) Protein DmX-like 2 (Rabconnectin-3) [MASS=339755]                                                                                                   | 0.00 | 1.15  | 3.64  | 0.00 | 1 | 2 | 3 | ESKSSDDVDYR                                  | 1 |
|                                                                                                                                                                          |      |       |       |      |   |   | 3 | TSKYM[147]PRGSVC[339]NVLTTSC[339]HDGVC[339]R | 1 |
| DNMT1_HUMAN (P26358) DNA (cytosine-5)-methyltransferase 1 (EC 2.1.1.37) (Dnmt1) (DNA methyltransferase Hsal) (DNA MTase Hsal) (MCMT) (M.Hsal) [MASS=183164]              | *    | 0.68  | *     | *    | * | 1 | 2 | DDREDKENAFK                                  | 1 |
|                                                                                                                                                                          |      |       |       |      |   |   |   |                                              |   |
| DPOLA_HUMAN (P09884) DNA polymerase alpha catalytic subunit (EC 2.7.7.7) [MASS=165912]                                                                                   | 0.00 | 2.74  | 0.34  | 0.00 | 1 | 3 | 1 | QEADSGK                                      | 2 |
|                                                                                                                                                                          |      |       |       |      |   |   | 2 | EILMHTKEMVQK                                 | 1 |
|                                                                                                                                                                          |      |       |       |      |   |   | 3 | AGDTVSYVIC[330]QDGSNLTASQR                   | 1 |
| DPOLN_HUMAN (Q7Z5Q5) DNA polymerase nu (EC 2.7.7.7) [MASS=100306]                                                                                                        | 0.00 | 1.33  | 13.31 | 0.00 | 1 | 1 | 3 | STFVDGLLAC[339]M[147]K                       | 1 |
| DPYL2_HUMAN (Q16555) Dihydropyrimidinase-related protein 2 (DRP-2) (Collapsin response mediator protein 2) (CRMP-2) (N2A3) [MASS=62293]                                  | 1.00 | 5.59  | 0.95  | 0.02 | 4 | 2 | 2 | AITIANQTNC[330]PLYITK                        | 1 |
|                                                                                                                                                                          |      |       |       |      |   |   | 2 | FQLTDC[330]QIYEVLSVIR                        | 2 |
|                                                                                                                                                                          |      |       |       |      |   |   | 2 | FQLTDC[339]QIYEVLSVIR                        | 1 |
| DUOX1_HUMAN (Q9NRD9) Dual oxidase 1 precursor (EC 1.6.3.1) (EC 1.11.1.-) (NADPH thyroid oxidase 1) (Thyroid oxidase 1) (Large NOX 1) (Long NOX 1) [MASS=177234]          | *    | 1.68  | *     | *    | * | 2 | 3 | QHPDWEDEELFQHAR                              | 1 |
|                                                                                                                                                                          |      |       |       |      |   |   | 3 | NVEKAC[330]QLINR                             | 1 |

|                                                                                                                                                                                                                                                              |      |       |      |      |   |   |   |                                         |   |
|--------------------------------------------------------------------------------------------------------------------------------------------------------------------------------------------------------------------------------------------------------------|------|-------|------|------|---|---|---|-----------------------------------------|---|
| DUS4_HUMAN (Q13115) Dual specificity protein phosphatase 4 (EC 3.1.3.48) (EC 3.1.3.16) (Mitogen-activated protein kinase phosphatase 2) (MAP kinase phosphatase 2) (MKP-2) (Dual specificity protein phosphatase hVH2) [MASS=42953]                          | 0.00 | 6.09  | 1.14 | 0.00 | 1 | 1 | 3 | C[330]LLLLDC[330]RPFLAHSAGYILGSVNVR     | 1 |
| DYH5_HUMAN (Q8TE73) Ciliary dynein heavy chain 5 (Axonemal beta dynein heavy chain 5) (HL1) [MASS=529002]                                                                                                                                                    | *    | 0.63  | *    | *    | * | 2 | 2 | GITFIFTDNEIK                            | 1 |
|                                                                                                                                                                                                                                                              |      |       |      |      |   |   | 2 | EMRM[147]NPKAITAPQM[147]FGR             | 1 |
| DYL1_HUMAN (P63167) Dynein light chain 1, cytoplasmic (Dynein light chain LC8-type 1) (8 kDa dynein light chain) (DLC8) (Protein inhibitor of neuronal nitric oxide synthase) (PIN) [MASS=10366]                                                             | 1.00 | 12.36 | 0.63 | 0.00 | 2 | 1 | 2 | YNPTWHC[330]IVGR                        | 1 |
|                                                                                                                                                                                                                                                              |      |       |      |      |   |   | 2 | YNPTWHC[339]IVGR                        | 1 |
| DYN1_HUMAN (Q05193) Dynamin-1 (EC 3.6.5.5) [MASS=97407]                                                                                                                                                                                                      | 0.86 | 5.21  | 0.96 | 0.00 | 1 | 2 | 2 | TIGVITKLDLM[147]DEGTDARDVLENK           | 1 |
|                                                                                                                                                                                                                                                              |      |       |      |      |   |   | 3 | RPLVLQLVNATTEYAEFLHC[330]K              | 1 |
| DYN3_HUMAN (Q9UQ16) Dynamin-3 (EC 3.6.5.5) (Dynamin, testicular) (T-dynamin) [MASS=96681]                                                                                                                                                                    | *    | 1.75  | *    | *    | * | 1 | 3 | YMLPLDNLKVRDVEK                         | 1 |
| DZIP1_HUMAN (Q86YF9) Zinc finger protein DZIP1 (DAZ-interacting protein 1/2) [MASS=98663]                                                                                                                                                                    | 0.00 | 3.34  | 1.34 | 0.00 | 1 | 1 | 3 | LSAIDVDKVAGAVDVLTLQENIM[147]NITFC[339]K | 1 |
|                                                                                                                                                                                                                                                              |      |       |      |      |   |   | 2 | C[330]LEENLGIDKR                        | 2 |
| EAA2_HUMAN (P43004) Excitatory amino acid transporter 2 (Sodium-dependent glutamate/aspartate transporter 2) [MASS=62104]                                                                                                                                    | 1.00 | 5.40  | 0.74 | 0.16 | 6 | 2 | 2 | NLFPENLVQAC[330]FQQIQTGTK               | 2 |
|                                                                                                                                                                                                                                                              |      |       |      |      |   |   | 2 | NLFPENLVQAC[339]FQQIQTGTK               | 2 |
| EAA4_HUMAN (P48664) Excitatory amino acid transporter 4 (Sodium-dependent glutamate/aspartate transporter) [MASS=61565]                                                                                                                                      | *    | 5.32  | *    | *    | * | 2 | 2 | DFFDSLNEAIMR                            | 1 |
|                                                                                                                                                                                                                                                              |      |       |      |      |   |   | 3 | EGRIETIPTADAFMDLIR                      | 1 |
| ECHA_HUMAN (P40939) Trifunctional enzyme subunit alpha, mitochondrial precursor (TP-alpha) (78 kDa gastrin-binding protein) [Includes: Long-chain enoyl-CoA hydratase (EC 4.2.1.17); Long chain 3-hydroxyacyl-CoA dehydrogenase (EC 1.1.1.211)] [MASS=82999] | 1.00 | 11.66 | 1.47 | 0.01 | 2 | 6 | 1 | FSAFR                                   | 1 |
|                                                                                                                                                                                                                                                              |      |       |      |      |   |   | 3 | DTSASAVAVGLKQGK                         | 1 |
|                                                                                                                                                                                                                                                              |      |       |      |      |   |   | 2 | ALM[147]GLYHGQVLC[330]K                 | 1 |
|                                                                                                                                                                                                                                                              |      |       |      |      |   |   | 3 | MVGVPAALDM[147]MLTGRSIRADR              | 1 |
|                                                                                                                                                                                                                                                              |      |       |      |      |   |   | 2 | C[330]LAPM[147]M[147]SEVIR              | 1 |
|                                                                                                                                                                                                                                                              |      |       |      |      |   |   | 3 | HLAILGAGLMGAGIAQVSVDKGLK                | 1 |



|                                                                                                                                                                                                                                                                   |      |      |      |      |   |   |   |                                       |   |
|-------------------------------------------------------------------------------------------------------------------------------------------------------------------------------------------------------------------------------------------------------------------|------|------|------|------|---|---|---|---------------------------------------|---|
| ECHB_HUMAN (P55084) Trifunctional enzyme subunit beta, mitochondrial precursor (TP-beta) [Includes: 3-ketoacyl-CoA thiolase (EC 2.3.1.16) (Acetyl-CoA acyltransferase) (Beta-ketothiolase)] [MASS=51395]                                                          | 1.00 | 9.89 | 1.25 | 0.12 | 2 | 2 | 3 | EGGQYGLVAAC[330]AAGGQGHAM[147]IVEAYPK | 1 |
|                                                                                                                                                                                                                                                                   |      |      |      |      |   |   | 2 | FNNWGGSLSLGHPFGATGC[339]R             | 1 |
| ECHM_HUMAN (P30084) Enoyl-CoA hydratase, mitochondrial precursor (EC 4.2.1.17) (Short chain enoyl-CoA hydratase) (SCEH) (Enoyl-CoA hydratase 1) [MASS=31387]                                                                                                      | 0.81 | 4.83 | 1.54 | 0.00 | 1 | 1 | 2 | EM[147]QNLSFQDC[330]YSSK              | 1 |
| EF2_HUMAN (P13639) Elongation factor 2 (EF-2) [MASS=95206]                                                                                                                                                                                                        | *    | 3.50 | *    | *    | * | 2 | 3 | GGGQIIPARRC[339]LYASVLTAQPR           | 1 |
|                                                                                                                                                                                                                                                                   |      |      |      |      |   |   | 1 | M[147]VPTSDK                          | 1 |
| EFG2_HUMAN (Q969S9) Elongation factor G 2, mitochondrial precursor (mEF-G 2) (Elongation factor G2) [MASS=86600]                                                                                                                                                  | *    | 2.57 | *    | *    | * | 1 | 3 | HTATGDTIVSSKSSALAAAR                  | 1 |
| EFTU_HUMAN (P49411) Elongation factor Tu, mitochondrial precursor (EF-Tu) (P43) [MASS=49541]                                                                                                                                                                      | 1.00 | 5.97 | 1.20 | 0.06 | 4 | 2 | 2 | KGDEC[339]ELLGHSK                     | 1 |
|                                                                                                                                                                                                                                                                   |      |      |      |      |   |   | 1 | KGDEC[339]ELLGHSK                     | 1 |
|                                                                                                                                                                                                                                                                   |      |      |      |      |   |   | 2 | HYAHTDC[339]PGHADYVK                  | 2 |
| EHMT2_HUMAN (Q96KQ7) Histone-lysine N-methyltransferase, H3 lysine-9 specific 3 (EC 2.1.1.43) (Histone H3-K9 methyltransferase 3) (H3-K9-HMTase 3) (Euchromatic histone-lysine N-methyltransferase 2) (HLA-B-associated transcript 8) (Protein G9a) [MASS=132383] | *    | 4.21 | *    | *    | * | 3 | 2 | ILLGHATKSFPPSSPSK                     | 1 |
|                                                                                                                                                                                                                                                                   |      |      |      |      |   |   | 2 | DIRTGEELGFDYGDRFWDIK                  | 1 |
|                                                                                                                                                                                                                                                                   |      |      |      |      |   |   | 2 | EALEKALVIQESERR                       | 1 |
| EMAL4_HUMAN (Q9HC35) Echinoderm microtubule-associated protein-like 4 (EMAP-4) (Restrictedly overexpressed proliferation-associated protein) (Ropp 120) [MASS=108902]                                                                                             | *    | 1.43 | *    | *    | * | 1 | 2 | RLAISEDHVASVKK                        | 1 |
| ENOA_HUMAN (P06733) Alpha-enolase (EC 4.2.1.11) (2-phospho-D-glycerate hydro-lyase) (Non-neural enolase) (NNE) (Enolase 1) (Phosphopyruvate hydratase) (C-myc promoter-binding protein) (MBP-1) (MPB-1) (Plasminogen-binding protein) [MASS=47037]                | 1.00 | 3.46 | 1.06 | 0.07 | 2 | 1 | 1 | FGANAILGVSLAVC[330]K                  | 1 |
|                                                                                                                                                                                                                                                                   |      |      |      |      |   |   | 2 | FGANAILGVSLAVC[330]K                  | 1 |
|                                                                                                                                                                                                                                                                   |      |      |      |      |   |   | 2 | FGANAILGVSLAVC[339]K                  | 1 |

|                                                                                                                                                                                                                                                 |      |       |      |      |   |   |   |                                                                                                               |                       |
|-------------------------------------------------------------------------------------------------------------------------------------------------------------------------------------------------------------------------------------------------|------|-------|------|------|---|---|---|---------------------------------------------------------------------------------------------------------------|-----------------------|
| ENOG_HUMAN (P09104) Gamma-enolase (EC 4.2.1.11) (2-phospho-D-glycerate hydrolyase) (Neural enolase) (Neuron-specific enolase) (NSE) (Enolase 2) [MASS=47137]                                                                                    | 1.00 | 10.39 | *    | *    | * | 2 | 3 | LAM[147]QEFMILPVGAEFRDAMRLGAEVYHTLK<br>3 IVIGM[147]DVAASEFYR                                                  | 1<br>1                |
| EP400_HUMAN (Q96L91) E1A-binding protein p400 (EC 3.6.1.-) (p400 kDa SWI2/SNF2-related protein) (Domino homolog) (hDomino) (CAG repeat protein 32) (Trinucleotide repeat-containing gene 12 protein) [MASS=343645]                              | 0.00 | 1.93  | *    | *    | * | 5 | 1 | 1 TDPSAAGR<br>1 ATPGLLK<br>1 TPTKPPC[339]Q<br>2 EYLIELFFLQHFQGNMMDFLAFK<br>2 AVGKLTPEHLIKM[147]QK             | 1<br>1<br>1<br>1<br>1 |
| EPC2_HUMAN (Q52LR7) Enhancer of polycomb homolog 2 [MASS=91094]                                                                                                                                                                                 | 0.00 | 6.82  | *    | *    | * | 3 | 3 | 3 LDQANHSC[339]ENSELADLDK<br>3 KPKAELITSQQPTPETLPVINK<br>2 M[147]EIKPLQFEIM[147]IDR                           | 1<br>1<br>1           |
| EPHA4_HUMAN (P54764) Ephrin type-A receptor 4 precursor (EC 2.7.10.1) (Tyrosine-protein kinase receptor SEK) (Receptor protein-tyrosine kinase HEK8) [MASS=109859]                                                                              | 0.00 | 4.46  | 0.37 | 0.00 | 1 | 3 | 1 | 1 GIGSGM[147]K<br>2 TYVDPFTYEDPNQAVR<br>3 C[330]KPVM[147]IITEYM[147]ENGLDAFLR                                 | 2<br>1<br>1           |
| ERAL_HUMAN (O75616) GTP-binding protein era homolog (hERA) (ERA-W) (Conserved ERA-like GTPase) (CEGA) [MASS=48350]                                                                                                                              | 0.00 | 7.78  | *    | *    | * | 2 | 2 | 2 C[339]VSC[339]VAGSAFSGPRLASASR<br>3 VLRVLLGAPNAGK                                                           | 1<br>1                |
| ES1_HUMAN (P30042) ES1 protein homolog, mitochondrial precursor (Protein KNP-I) (Protein GT335) [MASS=28142]                                                                                                                                    | 1.00 | 14.18 | 1.56 | 0.06 | 3 | 3 | 1 | 1 HC[339]VK<br>2 EFHQAGKPIGLC[339]C[339]IAPVLAAK<br>3 EFHQAGKPIGLC[330]C[330]IAPVLAAK<br>2 NLSTFAVDGKDC[339]K | 1<br>1<br>1<br>1      |
| ETFD_HUMAN (Q16134) Electron transfer flavoprotein-ubiquinone oxidoreductase, mitochondrial precursor (EC 1.5.5.1) (ETF-QO) (ETF-ubiquinone oxidoreductase) (ETF dehydrogenase) (Electron-transferring-flavoprotein dehydrogenase) [MASS=68507] | 1.00 | 5.02  | 1.09 | 0.04 | 2 | 2 | 2 | 2 LQINAQNC[330]VHC[330]K<br>2 FC[339]PAGVYEFVPVEQGDGFR                                                        | 1<br>1                |
| F106A_HUMAN (Q4KMX7) Protein FAM106A [MASS=18675]                                                                                                                                                                                               | 0.21 | 3.55  | 2.60 | 0.00 | 1 | 1 | 2 | 2 NLLEC[339]R<br>2 YQENAQLSVKQVR                                                                              | 1<br>1                |
| FA29A_HUMAN (Q7Z4H7) Protein FAM29A [MASS=108621]                                                                                                                                                                                               | *    | 7.02  | *    | *    | * | 4 | 3 | 3 M[147]ETFSPAVGNRIDVMGGSEEEFM[147]K<br>3 NSSHHFVETFNIPQDLHKC[339]IAR<br>1 QGEWHKK                            | 1<br>1<br>1           |
| FA53B_HUMAN (Q14153) Protein FAM53B [MASS=45796]                                                                                                                                                                                                | *    | 9.24  | *    | *    | * | 2 | 3 | 3 SLSFSDEMSSC[339]RTSWR<br>3 MSQGPTLFSC[339]GIMENDRWRDLDR                                                     | 1<br>1                |

|                                                                                                                                                                                                                       |      |       |       |      |   |   |   |                                         |   |
|-----------------------------------------------------------------------------------------------------------------------------------------------------------------------------------------------------------------------|------|-------|-------|------|---|---|---|-----------------------------------------|---|
| FANCM_HUMAN (Q8IYD8) Fanconi anemia group M protein (EC 3.6.1.-) (ATP-dependent RNA helicase FANCM) (Protein FANCM) (Fanconi anemia-associated polypeptide of 250 kDa) (FAAP250) (Protein Hef ortholog) [MASS=232190] | 0.00 | 2.49  | 2.90  | 0.07 | 2 | 4 | 1 | VSKEIK                                  | 2 |
|                                                                                                                                                                                                                       |      |       |       |      |   |   | 2 | ESNIAVNPSTVK                            | 1 |
|                                                                                                                                                                                                                       |      |       |       |      |   |   | 1 | KVMSTPLSK                               | 1 |
|                                                                                                                                                                                                                       |      |       |       |      |   |   | 3 | SC[339]HSVEDGQLLTSNESEDDEIFRR           | 2 |
| FBLN1_HUMAN (P23142) Fibulin-1 precursor [MASS=77261]                                                                                                                                                                 | 0.00 | 3.41  | 12.37 | 0.00 | 1 | 1 | 3 | AAQAQGQSC[339]EYSLM[147]VGYQC[339]GQVFR | 1 |
| FBN1_HUMAN (P35555) Fibrillin-1 precursor [MASS=312312]                                                                                                                                                               | *    | 0.38  | *     | *    | * | 1 | 2 | SGNC[330]YLDIRPR                        | 1 |
| FBN2_HUMAN (P35556) Fibrillin-2 precursor [MASS=314347]                                                                                                                                                               | *    | 1.20  | *     | *    | * | 2 | 2 | RGQQDVLRGPNVC[339]GSR                   | 1 |
|                                                                                                                                                                                                                       |      |       |       |      |   |   | 3 | HHANLC[330]LNGRC[339]IPTVSSYR           | 1 |
| FBX38_HUMAN (Q6PIJ6) F-box only protein 38 (Modulator of KLF7 activity homolog) (MoKA) [MASS=133953]                                                                                                                  | *    | 0.59  | *     | *    | * | 1 | 2 | GKTPLRK                                 | 1 |
| FBXL8_HUMAN (Q96CD0) F-box/LRR-repeat protein 8 (F-box and leucine-rich repeat protein 8) (F-box protein FBL8) [MASS=40516]                                                                                           | 0.26 | 17.38 | *     | *    | * | 3 | 3 | EVHC[330]FC[339]VVSHSVLDAFRAHC[339]PR   | 1 |
|                                                                                                                                                                                                                       |      |       |       |      |   |   | 3 | HPGLAVELELEPALPAESVTR                   | 1 |
|                                                                                                                                                                                                                       |      |       |       |      |   |   | 3 | C[339]AALREVHC[339]FC[339]VVSHSVLDAFR   | 1 |
| FGFR1_HUMAN (P11362) Basic fibroblast growth factor receptor 1 precursor (EC 2.7.10.1) (FGFR-1) (bFGF-R) (Fms-like tyrosine kinase 2) (c-fgr) (CD331 antigen) [MASS=91867]                                            | *    | 3.65  | *     | *    | * | 2 | 2 | PNRMPVAPYWTSPEK                         | 1 |
|                                                                                                                                                                                                                       |      |       |       |      |   |   | 2 | M[147]PVAPYWTSPEKMEK                    | 1 |
| FNBP2_HUMAN (O75044) SLIT-ROBO Rho GTPase-activating protein 2 (srGAP2) (Formin-binding protein 2) [MASS=120880]                                                                                                      | *    | 0.93  | *     | *    | * | 1 | 2 | LAERFLAKTR                              | 1 |
| FOG2_HUMAN (Q8WW38) Zinc finger protein ZFPM2 (Zinc finger protein multitype 2) (Friend of GATA protein 2) (FOG-2) (hFOG-2) [MASS=128142]                                                                             | 0.00 | 3.82  | 1.72  | 0.00 | 1 | 2 | 3 | GGQLWC[339]TTTKAISEGEELIAFVVDFDSR       | 1 |
|                                                                                                                                                                                                                       |      |       |       |      |   |   | 3 | NSPDVSYERSIIKC[330]EK                   | 1 |
| FOXH1_HUMAN (O75593) Forkhead box protein H1 (Forkhead activin signal transducer 1) (Fast-1) (hFAST-1) (Forkhead activin signal transducer 2) (Fast-2) [MASS=39257]                                                   | 0.00 | 4.38  | 1.51  | 0.00 | 1 | 1 | 2 | DLAAPGPGWLLSWC[339]SL                   | 1 |

|                                                                                                                                                                                                                                                                             |      |       |      |      |   |   |             |                                                                  |             |
|-----------------------------------------------------------------------------------------------------------------------------------------------------------------------------------------------------------------------------------------------------------------------------|------|-------|------|------|---|---|-------------|------------------------------------------------------------------|-------------|
| FRS3_HUMAN (O43559) Fibroblast growth factor receptor substrate 3 (FGFR substrate 3) (Suc1-associated neurotrophic factor target 2) (SNT-2) (FGFR signaling adaptor SNT2) [MASS=54330]                                                                                      | *    | 1.02  | *    | *    | * | 1 | 1           | REAVR                                                            | 1           |
| FUBP2_HUMAN (Q92945) Far upstream element-binding protein 2 (FUSE-binding protein 2) (KH type-splicing regulatory protein) (KSRP) (p75) [MASS=72709]                                                                                                                        | *    | 5.37  | *    | *    | * | 2 | 3<br>2      | LASQGDSISSQLGPIHPPPR<br>IGQQPQQPGAPPQQDYTK                       | 1<br>1      |
| FXL19_HUMAN (Q6PCT2) F-box/LRR-repeat protein 19 (F-box and leucine-rich repeat protein 19) [MASS=73770]                                                                                                                                                                    | 0.00 | 3.26  | 0.63 | 0.00 | 1 | 1 | 2           | VGGDAC[330]LLRGSDPGGPGLLPPR                                      | 1           |
| FXL20_HUMAN (Q96IG2) F-box/LRR-repeat protein 20 (F-box and leucine-rich repeat protein 20) (F-box/LRR-repeat protein 2-like) [MASS=48423]                                                                                                                                  | *    | 2.29  | *    | *    | * | 1 | 1           | RDVNGVTKSR                                                       | 1           |
| G3P_HUMAN (P04406) Glyceraldehyde-3-phosphate dehydrogenase (EC 1.2.1.12) (GAPDH) [MASS=35922]                                                                                                                                                                              | 1.00 | 10.18 | 0.86 | 0.02 | 2 | 2 | 2<br>3      | VPTANVSVVDLTC[330]JR<br>VPTANVSVVDLTC[330]RLEKPAK                | 1<br>1      |
| G6PD_HUMAN (P11413) Glucose-6-phosphate 1-dehydrogenase (EC 1.1.1.49) (G6PD) [MASS=59134]                                                                                                                                                                                   | *    | 5.84  | *    | *    | * | 1 | 3           | LFYLALPPTVYEAVTKNIHESC[339]MSQIGWNR                              | 1           |
| GABR2_HUMAN (O75899) Gamma-aminobutyric acid type B receptor, subunit 2 precursor (GABA-B receptor 2) (GABA-B-R2) (Gb2) (GABABR2) (G-protein coupled receptor 51) (HG20) [MASS=105821]                                                                                      | 0.00 | 1.81  | 1.17 | 0.00 | 1 | 1 | 3           | TC[339]KDPIEDINSPEHIQR                                           | 1           |
| GABT_HUMAN (P80404) 4-aminobutyrate aminotransferase, mitochondrial precursor (EC 2.6.1.19) ((S)-3-amino-2-methylpropionate transaminase) (EC 2.6.1.22) (Gamma-amino-N-butyrate transaminase) (GABA transaminase) (GABA aminotransferase) (GABA-AT) (GABA-T) ( [MASS=56439] | 1.00 | 7.20  | 1.25 | 0.02 | 3 | 3 | 2<br>2<br>2 | C[339]LEEVEDLIVK<br>TM[147]GC[339]LATTHSK<br>GTFC[339]SFDPDDISIR | 1<br>1<br>1 |
| GAS6_HUMAN (Q14393) Growth-arrest-specific protein 6 precursor (GAS-6) [MASS=79676]                                                                                                                                                                                         | *    | 6.52  | *    | *    | * | 2 | 3<br>2      | SWNWLNGEDTTIQETVKVNTRMQC[339]FSVTER<br>SWNWLNGEDTTIQETVK         | 1<br>1      |

|                                                                                                                                                                                                                                                    |      |       |      |      |   |   |                         |                                            |   |
|----------------------------------------------------------------------------------------------------------------------------------------------------------------------------------------------------------------------------------------------------|------|-------|------|------|---|---|-------------------------|--------------------------------------------|---|
| GASP1_HUMAN (Q5JY77) G-protein coupled receptor-associated sorting protein 1 (GASP-1) [MASS=156850]                                                                                                                                                | *    | 2.87  | *    | *    | * | 2 | 2                       | MTGAEIESGAQVKPEK                           | 1 |
|                                                                                                                                                                                                                                                    |      |       |      |      |   |   | 2                       | EVYVLESSGSEHEDHLESWFGAGK                   | 1 |
| GBB1_HUMAN (P62873) Guanine nucleotide-binding protein G(I)/G(S)/G(T) subunit beta 1 (Transducin beta chain 1) [MASS=37246]                                                                                                                        | 1.00 | 28.02 | 0.97 | 0.09 | 6 | 5 | 3                       | QTFTGHESDINAIC[339]FFPNGNAFATGSDDATC[330]R | 1 |
|                                                                                                                                                                                                                                                    |      |       |      |      |   |   | 2                       | LLLAGYDDFNC[330]NVWDALK                    | 1 |
|                                                                                                                                                                                                                                                    |      |       |      |      |   |   | 2                       | LFVSGAC[339]DASAK                          | 1 |
|                                                                                                                                                                                                                                                    |      |       |      |      |   |   | 2                       | KAC[339]ADATLSQITNNIDPVGR                  | 1 |
|                                                                                                                                                                                                                                                    |      |       |      |      |   |   | 2                       | ELAGHTGYLSC[339]C[339]R                    | 1 |
|                                                                                                                                                                                                                                                    |      |       |      |      |   |   | 2                       | LLLAGYDDFNC[339]NVWDALK                    | 1 |
|                                                                                                                                                                                                                                                    |      |       |      |      |   | 2 | ELAGHTGYLSC[330]C[330]R | 1                                          |   |
| GBB4_HUMAN (Q9HAV0) Guanine nucleotide-binding protein subunit beta 4 (Transducin beta chain 4) [MASS=37436]                                                                                                                                       | 0.00 | 6.78  | 0.22 | 0.00 | 1 | 1 | 3                       | AC[330]NDATLVQITSNMDSVGRIQM[147]R          | 1 |
| GBG2_HUMAN (P59768) Guanine nucleotide-binding protein G(I)/G(S)/G(O) gamma-2 subunit precursor (G gamma-I) [MASS=7719]                                                                                                                            | 0.89 | 30.00 | 0.81 | 0.00 | 1 | 2 | 2                       | AAADLM[147]AYC[339]EAHAK                   | 1 |
|                                                                                                                                                                                                                                                    |      |       |      |      |   |   | 1                       | KLVEQLK                                    | 1 |
| GBLP_HUMAN (P63244) Guanine nucleotide-binding protein subunit beta 2-like 1 (Guanine nucleotide-binding protein subunit beta-like protein 12.3) (Receptor of activated protein kinase C 1) (RACK1) (Receptor for activated C kinase) [MASS=34945] | 0.00 | 8.54  | 0.84 | 0.00 | 1 | 1 | 3                       | TNHIGHTGYLNTVTVSPDGSLC[330]ASGGK           | 1 |
| GBRR1_HUMAN (P24046) Gamma-aminobutyric-acid receptor rho-1 subunit precursor (GABA(A) receptor) [MASS=55257]                                                                                                                                      | 0.00 | 2.75  | 0.27 | 0.00 | 1 | 1 | 3                       | VTVTAMC[330]NMDFSR                         | 1 |
| GCP2_HUMAN (Q9BSJ2) Gamma-tubulin complex component 2 (GCP-2) (Spindle pole body protein Spc97 homolog) (hSpc97) (hGCP2) (h103p) [MASS=102533]                                                                                                     | *    | 1.11  | *    | *    | * | 1 | 2                       | YVSAQPLAGR                                 | 2 |
| GDIA_HUMAN (P31150) Rab GDP dissociation inhibitor alpha (Rab GDI alpha) (Guanosine diphosphate dissociation inhibitor 1) (GDI-1) (XAP-4) (Oligophrenin-2) [MASS=50582]                                                                            | 0.96 | 2.24  | 1.19 | 0.00 | 1 | 1 | 2                       | IIC[330]ILSHPIK                            | 1 |

|                                                                                                                                                                                                                                                                              |      |       |      |      |   |   |   |                                               |   |
|------------------------------------------------------------------------------------------------------------------------------------------------------------------------------------------------------------------------------------------------------------------------------|------|-------|------|------|---|---|---|-----------------------------------------------|---|
| GHC1_HUMAN (Q9H936) Mitochondrial glutamate carrier 1 (GC-1) (Glutamate/H(+) symporter 1) (Solute carrier family 25 member 22) [MASS=34470]                                                                                                                                  | 1.00 | 21.98 | 1.01 | 0.12 | 3 | 3 | 2 | LINGGIAGLIGVTC[339]VFPIDLAK                   | 1 |
|                                                                                                                                                                                                                                                                              |      |       |      |      |   |   | 3 | PASEEKSPFYVVSFLAGC[330]VAGSAAAVAVNPC[339]DVVK | 1 |
|                                                                                                                                                                                                                                                                              |      |       |      |      |   |   | 2 | LINGGIAGLIGVTC[330]VFPIDLAK                   | 1 |
|                                                                                                                                                                                                                                                                              |      |       |      |      |   |   | 1 | GVNEDTYSGLDC[330]JAR                          | 1 |
| GLNA_HUMAN (P15104) Glutamine synthetase (EC 6.3.1.2) (Glutamate--ammonia ligase) (GS) [MASS=41933]                                                                                                                                                                          | 0.00 | 3.49  | 0.92 | 0.00 | 1 | 1 | 2 | KDPNKLVLC[339]EVFK                            | 1 |
|                                                                                                                                                                                                                                                                              |      |       |      |      |   |   | 2 | C[339]VQSNIVLLTQAFR                           | 3 |
| GLSK_HUMAN (O94925) Glutaminase kidney isoform, mitochondrial precursor (EC 3.5.1.2) (GLS) (L-glutamine amidohydrolase) (K-glutaminase) [MASS=73461]                                                                                                                         | 1.00 | 5.38  | 1.49 | 0.03 | 7 | 3 | 2 | LKEC[330]M[147]DM[147]LR                      | 1 |
|                                                                                                                                                                                                                                                                              |      |       |      |      |   |   | 2 | C[330]VQSNIVLLTQAFR                           | 1 |
|                                                                                                                                                                                                                                                                              |      |       |      |      |   |   | 2 | VPFC[330]LQSC[330]VKPLK                       | 1 |
|                                                                                                                                                                                                                                                                              |      |       |      |      |   |   | 2 | VPFC[339]LQSC[339]VKPLK                       | 2 |
| GLT10_HUMAN (Q86SR1) Polypeptide N-acetylgalactosaminyltransferase 10 (EC 2.4.1.41) (Protein-UDP acetylgalactosaminyltransferase 10) (UDP-GalNAc:polypeptide N-acetylgalactosaminyltransferase 10) (Polypeptide GalNAc transferase 10) (GalNAc-T10) (pp-GaNTas [MASS=68991]) | *    | 1.00  | *    | *    | * | 1 | 1 | GNQLWK                                        | 1 |
| GNAI1_HUMAN (P63096) Guanine nucleotide-binding protein G(i), alpha-1 subunit (Adenylate cyclase-inhibiting G alpha protein) [MASS=40230]                                                                                                                                    | 1.00 | 3.68  | 1.15 | 0.11 | 3 | 1 | 2 | EIYTHFTC[339]ATDTK                            | 1 |
|                                                                                                                                                                                                                                                                              |      |       |      |      |   |   | 2 | EIYTHFTC[330]ATDTK                            | 2 |
| GNAO1_HUMAN (P09471) Guanine nucleotide-binding protein G(o) subunit alpha 1 [MASS=39919]                                                                                                                                                                                    | 1.00 | 19.55 | 1.22 | 0.00 | 1 | 4 | 2 | LWGDSGIQEC[330]FNR                            | 1 |
|                                                                                                                                                                                                                                                                              |      |       |      |      |   |   | 2 | M[147]VC[330]DVVSR                            | 1 |
|                                                                                                                                                                                                                                                                              |      |       |      |      |   |   | 3 | KSPLTIC[339]FPEYTGPNYEDAAAYIQAQFESK           | 1 |
|                                                                                                                                                                                                                                                                              |      |       |      |      |   |   | 2 | M[147]EDTEPFSAELLSAM[147]M[147]R              | 1 |
| GNAO2_HUMAN (P29777) Guanine nucleotide-binding protein G(o) subunit alpha 2 [MASS=39955]                                                                                                                                                                                    | 1.00 | 8.50  | 1.27 | 0.00 | 1 | 1 | 3 | SPLTIC[339]FPEYTGPSAFTEAVAYIQAQYESK           | 1 |
| GP179_HUMAN (Q6PRD1) Probable G-protein coupled receptor 179 precursor (Probable G-protein coupled receptor 158-like 1) [MASS=257362]                                                                                                                                        | 0.00 | 1.06  | 1.91 | 0.02 | 2 | 2 | 3 | VAEVC[339]LWEVVEAPSAKK                        | 2 |
|                                                                                                                                                                                                                                                                              |      |       |      |      |   |   | 2 | SPRLGRPK                                      | 1 |

|                                                                                                                                                                                                     |      |       |      |      |   |   |   |                                      |   |
|-----------------------------------------------------------------------------------------------------------------------------------------------------------------------------------------------------|------|-------|------|------|---|---|---|--------------------------------------|---|
| GPDM_HUMAN (P43304) Glycerol-3-phosphate dehydrogenase, mitochondrial precursor (EC 1.1.99.5) (GPD-M) (GPDH-M) (mtGPD) [MASS=80833]                                                                 | 0.98 | 1.38  | 1.05 | 0.00 | 1 | 1 | 2 | NYLSC[330]DVEVR                      | 1 |
| GPM6B_HUMAN (Q13491) Neuronal membrane glycoprotein M6-b (M6b) [MASS=28989]                                                                                                                         | 0.42 | 3.40  | 0.91 | 0.00 | 1 | 1 | 2 | SREDC[330]C[330]TKF                  | 1 |
| GPR37_HUMAN (O15354) Probable G-protein coupled receptor 37 precursor (Endothelin B receptor-like protein 1) (ETBR-LP-1) (Parkin-associated endothelin receptor-like receptor) (PAELR) [MASS=67113] | *    | 1.96  | *    | *    | * | 1 | 2 | QLSKEDLGFSGR                         | 1 |
| GPVI_HUMAN (Q9HCN6) Platelet glycoprotein VI precursor [MASS=36923]                                                                                                                                 | *    | 4.13  | *    | *    | * | 1 | 3 | C[339]QGPPGVDLYRLEK                  | 1 |
| GREM2_HUMAN (Q9H772) Gremlin-2 precursor (Cysteine knot superfamily 1, BMP antagonist 2) (Protein related to DAN and cerberus) [MASS=19320]                                                         | *    | 6.55  | *    | *    | * | 1 | 3 | C[330]M[147]SVNLSDSDK                | 1 |
| GRIN1_HUMAN (Q7Z2K8) G protein-regulated inducer of neurite outgrowth 1 (GRIN1) [MASS=102371]                                                                                                       | *    | 0.69  | *    | *    | * | 1 | 1 | DPGPGSGK                             | 1 |
| GSLG1_HUMAN (Q92896) Golgi apparatus protein 1 precursor (Golgi sialoglycoprotein MG-160) (E-selectin ligand 1) (ESL-1) (Cysteine-rich fibroblast growth factor receptor) (CFR-1) [MASS=134592]     | 0.00 | 1.36  | 0.45 | 0.00 | 1 | 1 | 2 | STITEIKEC[330]ADEPVGK                | 1 |
| H33_HUMAN (P84243) Histone H3.3 [MASS=15197]                                                                                                                                                        | 1.00 | 23.70 | 2.58 | 0.00 | 1 | 1 | 3 | FQSAAGALQEASEAYLVGLFEDTNLC[339]AIHAK | 1 |
| HBB_HUMAN (P68871) Hemoglobin subunit beta (Hemoglobin beta chain) (Beta-globin) [MASS=15867]                                                                                                       | 1.00 | 34.93 | 0.82 | 0.15 | 5 | 3 | 3 | GTFATLSELHC[339]DKLHVDPENFR          | 1 |
|                                                                                                                                                                                                     |      |       |      |      |   |   | 3 | GTFATLSELHC[330]DKLHVDPENFR          | 1 |
|                                                                                                                                                                                                     |      |       |      |      |   |   | 1 | GTFATLSELHC[330]DK                   | 1 |
|                                                                                                                                                                                                     |      |       |      |      |   |   | 2 | GTFATLSELHC[339]DK                   | 1 |
|                                                                                                                                                                                                     |      |       |      |      |   |   | 2 | LLGNVLC[330]VLAHHFGK                 | 1 |
| HC127_HUMAN (Q9NQZ6) Hepatocellular carcinoma-associated antigen 127 [MASS=26244]                                                                                                                   | 0.00 | 4.46  | 0.30 | 0.00 | 1 | 1 | 3 | M[147]ADEQEIMC[330]K                 | 1 |

|                                                                                                                                                                                                     |      |      |        |      |   |   |        |                                                       |        |
|-----------------------------------------------------------------------------------------------------------------------------------------------------------------------------------------------------|------|------|--------|------|---|---|--------|-------------------------------------------------------|--------|
| HG2A_HUMAN (P04233) HLA class II histocompatibility antigen gamma chain (HLA-DR antigens-associated invariant chain) (Ia antigen-associated invariant chain) (Ii) (p33) (CD74 antigen) [MASS=33515] | 0.00 | 7.43 | 0.64   | 0.00 | 1 | 1 | 2      | GHHNC[330]SESLELEDPSSGLGVTK                           | 1      |
| HGF_HUMAN (P14210) Hepatocyte growth factor precursor (Scatter factor) (SF) (Hepatopoeitin A) [Contains: Hepatocyte growth factor alpha chain; Hepatocyte growth factor beta chain] [MASS=83133]    | 0.00 | 3.71 | 1.72   | 0.00 | 1 | 1 | 3      | DLQENYC[339]RNPRGEEGGPWC[339]FTSNPEVR                 | 1      |
| HNF4A_HUMAN (P41235) Hepatocyte nuclear factor 4-alpha (HNF-4-alpha) (Transcription factor HNF-4) (Transcription factor 14) [MASS=51740]                                                            | 0.00 | 2.15 | 1.84   | 0.00 | 1 | 1 | 2      | HC[339]PELAEMSR                                       | 1      |
| HNRL1_HUMAN (Q9BUJ2) Heterogeneous nuclear ribonucleoprotein U-like protein 1 (Adenovirus early region 1B-associated protein 5) (E1B-55 kDa-associated protein 5) (E1B-AP5) [MASS=95738]            | *    | 1.87 | *      | *    | * | 1 | 3      | GRVC[339]FEMKINEEISVK                                 | 1      |
| HS74L_HUMAN (O95757) Heat shock 70 kDa protein 4L (Osmotic stress protein 94) (Heat shock 70-related protein APG-1) [MASS=94486]                                                                    | 0.00 | 4.41 | 142.58 | 0.00 | 1 | 2 | 3<br>3 | C[330]HAEHTPEEEIDHTGAKTKSAVSDK<br>C[339]ISDAMSWLNSK   | 1<br>1 |
| HS90B_HUMAN (P08238) Heat shock protein HSP 90-beta (HSP 84) (HSP 90) [MASS=83132]                                                                                                                  | 0.00 | 4.01 | *      | *    | * | 2 | 2<br>3 | HLEINPDHPIVETLRQK<br>DNSTM[147]GYM[147]M[147]AKK      | 1<br>1 |
| HSP71_HUMAN (P08107) Heat shock 70 kDa protein 1 (HSP70.1) (HSP70-1/HSP70-2) [MASS=70052]                                                                                                           | 0.00 | 5.93 | 0.13   | 0.00 | 1 | 2 | 2<br>3 | NALESYAFNM[147]KSAVEDEGLK GK<br>C[330]QEVISWLDANTLAEK | 1<br>1 |
| HXC11_HUMAN (O43248) Homeobox protein Hox-C11 [MASS=33748]                                                                                                                                          | *    | 9.87 | *      | *    | * | 1 | 3      | NSYSSC[339]YAAADELMHREC[339]LPPSTVTEILM[147]K         | 1      |



|                                                                                                                                                                                                                          |      |       |      |      |    |    |  |   |                                   |   |
|--------------------------------------------------------------------------------------------------------------------------------------------------------------------------------------------------------------------------|------|-------|------|------|----|----|--|---|-----------------------------------|---|
|                                                                                                                                                                                                                          |      |       |      |      |    |    |  | 2 | AAQLC[330]GAGM[147]AAVVDK         | 1 |
|                                                                                                                                                                                                                          |      |       |      |      |    |    |  | 2 | TVC[339]GVVSR                     | 2 |
|                                                                                                                                                                                                                          |      |       |      |      |    |    |  | 2 | C[339]NVSFLLSEDSGSK               | 2 |
|                                                                                                                                                                                                                          |      |       |      |      |    |    |  | 3 | MIAAQLLAYFTELKDDQVK               | 1 |
|                                                                                                                                                                                                                          |      |       |      |      |    |    |  | 2 | ATDC[339]VGHDVVTLR                | 1 |
|                                                                                                                                                                                                                          |      |       |      |      |    |    |  | 3 | LGVEPSDDDC[339]VSVQHVC[339]TIVSFR | 1 |
|                                                                                                                                                                                                                          |      |       |      |      |    |    |  | 2 | AILQLGLNSTC[339]DDSILVK           | 2 |
| HXK1_HUMAN (P19367) Hexokinase-1 (EC 2.7.1.1) (Hexokinase type I) (HK I) (Brain form hexokinase) [MASS=102484]                                                                                                           | 1.00 | 18.76 | 1.27 | 0.07 | 17 | 11 |  | 2 | AAQLC[339]GAGM[147]AAVVDK         | 2 |
|                                                                                                                                                                                                                          |      |       |      |      |    |    |  | 2 | KLPVGFTFSFPC[339]QQSK             | 1 |
|                                                                                                                                                                                                                          |      |       |      |      |    |    |  | 2 | ATDC[330]VGHDVVTLR                | 1 |
|                                                                                                                                                                                                                          |      |       |      |      |    |    |  | 2 | RAAQLC[330]GAGM[147]AAVVDK        | 1 |
|                                                                                                                                                                                                                          |      |       |      |      |    |    |  | 3 | LSDETLIDIM[147]TR                 | 1 |
|                                                                                                                                                                                                                          |      |       |      |      |    |    |  | 2 | LPVGFTFSFPC[339]QQSK              | 2 |
|                                                                                                                                                                                                                          |      |       |      |      |    |    |  | 2 | TVC[330]GVVSR                     | 1 |
| I17RB_HUMAN (Q9NRM6) Interleukin-17 receptor B precursor (IL-17 receptor B) (IL-17RB) (Interleukin-17B receptor) (IL-17B receptor) (IL-17 receptor homolog 1) (IL-17Rh1) (IL17Rh1) (Cytokine receptor CRL4) [MASS=55884] | 0.00 | 4.98  | 0.67 | 0.00 | 1  | 1  |  | 3 | SEGSPSENSQDLFPLAFNLFC[339]SDLR    | 1 |
| I2C1_HUMAN (Q9UL18) Eukaryotic translation initiation factor 2C 1 (eIF2C 1) (eIF-2C 1) (Argonaute-1) (Putative RNA-binding protein Q99) [MASS=97214]                                                                     | *    | 1.05  | *    | *    | *  | 1  |  | 2 | TPVYAEVKR                         | 1 |
| I2C3_HUMAN (Q9H9G7) Eukaryotic translation initiation factor 2C 3 (eIF2C 3) (eIF-2C 3) (Argonaute-3) [MASS=97360]                                                                                                        | *    | 3.02  | *    | *    | *  | 1  |  | 2 | PIKLLANC[330]FQVEIPKIDVYLYEVDIK   | 1 |
| IDH3A_HUMAN (P50213) Isocitrate dehydrogenase [NAD] subunit alpha, mitochondrial precursor (EC 1.1.1.41) (Isocitric dehydrogenase) (NAD(+)-specific ICDH) [MASS=39591]                                                   | 1.00 | 13.11 | 1.34 | 0.05 | 2  | 3  |  | 2 | TFDLYANVRPC[339]VSIEGYK           | 1 |
|                                                                                                                                                                                                                          |      |       |      |      |    |    |  | 2 | IEAAC[339]FATIK                   | 1 |
|                                                                                                                                                                                                                          |      |       |      |      |    |    |  | 3 | GPLKTPIAAGHPSMNLRLK               | 1 |

|                                                                                                                                                                                                                                           |      |       |      |      |   |   |   |                                     |   |
|-------------------------------------------------------------------------------------------------------------------------------------------------------------------------------------------------------------------------------------------|------|-------|------|------|---|---|---|-------------------------------------|---|
| IDH3G_HUMAN (P51553) Isocitrate dehydrogenase [NAD] subunit gamma, mitochondrial precursor (EC 1.1.1.41) (Isocitric dehydrogenase) (NAD(+)-specific ICDH) [MASS=42794]                                                                    | 1.00 | 21.88 | 0.93 | 0.06 | 4 | 6 | 2 | LGDGLFLQC[330]C[330]R               | 1 |
|                                                                                                                                                                                                                                           |      |       |      |      |   |   | 2 | TSLDLYANVIHC[339]K                  | 1 |
|                                                                                                                                                                                                                                           |      |       |      |      |   |   | 1 | KKVTAVHK                            | 1 |
|                                                                                                                                                                                                                                           |      |       |      |      |   |   | 2 | GNIETNHNLPESHK                      | 1 |
|                                                                                                                                                                                                                                           |      |       |      |      |   |   | 3 | SRNNILRTSLDLYANVIHC[330]K           | 1 |
|                                                                                                                                                                                                                                           |      |       |      |      |   |   | 2 | NIANPTATLLASC[339]M[147]M[147]LDHLK | 1 |
| IDHP_HUMAN (P48735) Isocitrate dehydrogenase [NADP], mitochondrial precursor (EC 1.1.1.42) (Oxalosuccinate decarboxylase) (IDH) (NADP(+)-specific ICDH) (IDP) (ICD-M) [MASS=50909]                                                        | 1.00 | 11.50 | 1.30 | 0.07 | 4 | 3 | 2 | NILGGTVFREPIIC[339]K                | 1 |
|                                                                                                                                                                                                                                           |      |       |      |      |   |   | 3 | PAWAPAALTAPTSQEQRHYADK              | 1 |
|                                                                                                                                                                                                                                           |      |       |      |      |   |   | 2 | DLAGC[339]IHGLSNVK                  | 1 |
|                                                                                                                                                                                                                                           |      |       |      |      |   |   | 2 | NILGGTVFREPIIC[330]K                | 1 |
| IGS4B_HUMAN (Q8N126) Immunoglobulin superfamily member 4B precursor (Nectin-like protein 1) (TSLC1-like protein 1) (Synaptic cell adhesion molecule 3) (Brain immunoglobulin receptor) [MASS=43300]                                       | 0.00 | 10.30 | 0.77 | 0.00 | 1 | 2 | 2 | DHEDSSLQWSNPAQQTLYFGEK              | 1 |
|                                                                                                                                                                                                                                           |      |       |      |      |   |   | 3 | EKDTATLNC[330]QSSGSKPAAR            | 1 |
| IGSF8_HUMAN (Q969P0) Immunoglobulin superfamily member 8 precursor (CD81 partner 3) (Glu-Trp-Ile EWI motif-containing protein 2) (EWI-2) (Keratinocytes-associated transmembrane protein 4) (KCT-4) (LIR-D1) (CD316 antigen) [MASS=65034] | *    | 2.28  | *    | *    | * | 1 | 2 | PEAPDTALGIVSTK                      | 1 |
| IKAR_HUMAN (Q13422) DNA-binding protein Ikaros (Lymphoid transcription factor LyF-1) [MASS=57528]                                                                                                                                         | 0.00 | 3.66  | 1.03 | 0.00 | 1 | 1 | 3 | VFLDLHVM[147]YTIHMGC[339]HGFR       | 1 |
| IL17_HUMAN (Q16552) Interleukin-17A precursor (IL-17A) (IL-17) (Cytotoxic T-lymphocyte-associated antigen 8) (CTLA-8) [MASS=17504]                                                                                                        | 0.00 | 16.13 | 0.22 | 0.61 | 2 | 2 | 3 | REPPHC[330]PNSFR                    | 3 |
|                                                                                                                                                                                                                                           |      |       |      |      |   |   | 3 | NPGC[339]PNSEDKNFPR                 | 1 |
| IL6RB_HUMAN (P40189) Interleukin-6 receptor beta chain precursor (IL-6R-beta) (Interleukin 6 signal transducer) (Membrane glycoprotein 130) (gp130) (Oncostatin M receptor) (CD130 antigen) (CDw130) [MASS=103522]                        | *    | 0.87  | *    | *    | * | 1 | 2 | TNHFTIPK                            | 1 |
| IMMT_HUMAN (Q16891) Mitochondrial inner membrane protein (Mitofilin) (p87/89) (Proliferation-inducing gene 4 protein) [MASS=83677]                                                                                                        | 0.99 | 2.51  | 1.17 | 0.00 | 1 | 1 | 2 | LLSYASYC[330]IEHGDLELAAK            | 1 |

|                                                                                                                                                                                                  |      |      |      |      |   |   |   |                                         |   |
|--------------------------------------------------------------------------------------------------------------------------------------------------------------------------------------------------|------|------|------|------|---|---|---|-----------------------------------------|---|
| IP3KB_HUMAN (P27987) Inositol-trisphosphate 3-kinase B (EC 2.7.1.127) (Inositol 1,4,5-trisphosphate 3-kinase B) (IP3K B) (IP3 3-kinase B) (IP3K-B) [MASS=102376]                                 | 0.00 | 6.34 | 1.02 | 0.00 | 1 | 4 | 2 | YMQWRETISSTATLGFR                       | 1 |
|                                                                                                                                                                                                  |      |      |      |      |   |   | 2 | IKNM[147]VHWSPFVM[147]SFK               | 1 |
|                                                                                                                                                                                                  |      |      |      |      |   |   | 1 | VLVQGAR                                 | 1 |
|                                                                                                                                                                                                  |      |      |      |      |   |   | 2 | MAVYC[330]YALNSLVIMNSANEM[147]K         | 1 |
| IPO11_HUMAN (Q9UI26) Importin-11 (Imp11) (Ran-binding protein 11) (RanBP11) [MASS=112535]                                                                                                        | *    | 6.36 | *    | *    | * | 3 | 3 | SLEFSVSYVFTEVGEGVTFER                   | 1 |
|                                                                                                                                                                                                  |      |      |      |      |   |   | 3 | FNQEM[147]DQLLGNMIEMWVDRM[147]DNITQPERR | 1 |
|                                                                                                                                                                                                  |      |      |      |      |   |   | 2 | RVAPHALSEEEK                            | 1 |
| IPYR2_HUMAN (Q9H2U2) Inorganic pyrophosphatase 2, mitochondrial precursor (EC 3.6.1.1) (PPase 2) (Pyrophosphatase SID6-306) [MASS=37962]                                                         | 0.54 | 3.29 | 0.88 | 0.00 | 1 | 1 | 2 | ILSC[339]GEVIHVK                        | 1 |
| ITA10_HUMAN (O75578) Integrin alpha-10 precursor [MASS=127573]                                                                                                                                   | *    | 2.06 | *    | *    | * | 1 | 3 | DC[330]GPDNEC[330]VTDLVLQVNMDIRGSR      | 1 |
| ITAV_HUMAN (P06756) Integrin alpha-V precursor (Vitronectin receptor subunit alpha) (CD51 antigen) [Contains: Integrin alpha-V heavy chain; Integrin alpha-V light chain] [MASS=116051]          | *    | 1.05 | *    | *    | * | 1 | 3 | TLGM[147]VYIYDGK                        | 1 |
| ITPR1_HUMAN (Q14643) Inositol 1,4,5-trisphosphate receptor type 1 (Type 1 inositol 1,4,5-trisphosphate receptor) (Type 1 InsP3 receptor) (IP3 receptor isoform 1) (InsP3R1) (IP3R) [MASS=313943] | 0.34 | 3.52 | 0.10 | 0.00 | 1 | 5 | 2 | LLLAIMESR                               | 2 |
|                                                                                                                                                                                                  |      |      |      |      |   |   | 2 | C[330]QDM[147]VM[147]AELVNSGEDVLVIFYNDR | 1 |
|                                                                                                                                                                                                  |      |      |      |      |   |   | 3 | SELWVYKGGPDETMDGASGENEHKK               | 1 |
|                                                                                                                                                                                                  |      |      |      |      |   |   | 3 | PGGGGGSGSSSMSRGENSLAEVQC[330]HLDK       | 1 |
|                                                                                                                                                                                                  |      |      |      |      |   |   | 2 | HNKELQSMLK                              | 1 |
| IVD_HUMAN (P26440) Isovaleryl-CoA dehydrogenase, mitochondrial precursor (EC 1.3.99.10) (IVD) [MASS=46319]                                                                                       | 0.00 | 7.33 | 5.66 | 0.00 | 1 | 3 | 3 | MADMYTRLMAC[339]R                       | 1 |
|                                                                                                                                                                                                  |      |      |      |      |   |   | 2 | GITAFIVEK                               | 2 |
| JAD1A_HUMAN (P29375) Jumonji/ARID domain-containing protein 1A (Retinoblastoma-binding protein 2) (RBBP-2) [MASS=195815]                                                                         | 0.00 | 3.25 | 0.34 | 0.00 | 1 | 4 | 2 | AC[339]DEGHC[339]TAK                    | 1 |
|                                                                                                                                                                                                  |      |      |      |      |   |   | 3 | M[147]AADPEC[330]LDVGLAAM[147]VC[330]K  | 1 |
|                                                                                                                                                                                                  |      |      |      |      |   |   | 3 | AANLAKMTMVDRIIEVK                       | 1 |
|                                                                                                                                                                                                  |      |      |      |      |   |   | 3 | C[339]VAEEEC[330]SKPR                   | 1 |
|                                                                                                                                                                                                  |      |      |      |      |   |   | 2 | DWQPPFAC[330]EVK                        | 1 |
| JAK3_HUMAN (P52333) Tyrosine-protein kinase JAK3 (EC 2.7.10.2) (Janus kinase 3) (JAK-3) (Leukocyte janus kinase) (L-JAK) [MASS=125098]                                                           | 0.00 | 4.45 | 0.57 | 0.00 | 1 | 2 | 3 | QQLPAPKWTEALLIQQC[339]M[147]AYEPVQR     | 1 |
|                                                                                                                                                                                                  |      |      |      |      |   |   | 3 | RSPQDFDSFLLTVVC[330]VQNPLGPDYK          | 1 |

|                                                                                                                                                                                                                                                                              |      |       |      |      |   |   |   |                                    |   |
|------------------------------------------------------------------------------------------------------------------------------------------------------------------------------------------------------------------------------------------------------------------------------|------|-------|------|------|---|---|---|------------------------------------|---|
| JHD1B_HUMAN (Q8NHM5) JmjC domain-containing histone demethylation protein 1B (EC 1.14.11.-) (F-box/LRR-repeat protein 10) (F-box and leucine-rich repeat protein 10) (F-box protein FBL10) (Protein JEMMA) (Jumonji domain-containing EMSY-interactor methyltr [MASS=152614] | *    | 2.40  | *    | *    | * | 2 | 2 | KPKAPALR                           | 1 |
|                                                                                                                                                                                                                                                                              |      |       |      |      |   |   | 3 | DSLTEINLSDC[330]NKVTDQC[339]LSFFKR | 1 |
| JHD2C_HUMAN (Q15652) Probable JmjC domain-containing histone demethylation protein 2C (EC 1.14.11.-) (Jumonji domain-containing protein 1C) (Thyroid receptor-interacting protein 8) (TRIP-8) [MASS=284523]                                                                  | *    | 2.76  | *    | *    | * | 4 | 2 | PSSSTKTDSPAMQLASK                  | 1 |
|                                                                                                                                                                                                                                                                              |      |       |      |      |   |   | 3 | VDLTQSSVTNASSGNDHLNM[147]EKEK      | 1 |
|                                                                                                                                                                                                                                                                              |      |       |      |      |   |   | 3 | NTNKM[147]ENSGNSVSEIHK             | 1 |
|                                                                                                                                                                                                                                                                              |      |       |      |      |   |   | 2 | EFWDGFEEVSK                        | 1 |
| K0182_HUMAN (Q14687) Protein KIAA0182 (Fragment) [MASS=130322]                                                                                                                                                                                                               | 0.00 | 0.95  | 0.37 | 0.00 | 1 | 1 | 3 | C[330]LALPAM[147]HWPR              | 3 |
|                                                                                                                                                                                                                                                                              |      |       |      |      |   |   | 2 | NLGMVC[339]R                       | 4 |
| K0196_HUMAN (Q12768) Protein KIAA0196 [MASS=134286]                                                                                                                                                                                                                          | *    | 2.24  | *    | *    | * | 2 |   |                                    |   |
| K0310_HUMAN (O15027) Protein KIAA0310 [MASS=233516]                                                                                                                                                                                                                          | *    | 0.92  | *    | *    | * | 2 | 2 | WLM[147]LHTADSAC[330]DPNNKRLR      | 1 |
|                                                                                                                                                                                                                                                                              |      |       |      |      |   |   | 1 | EGPAAAR                            | 1 |
| K0831_HUMAN (Q6ZNE5) Protein KIAA0831 [MASS=55309]                                                                                                                                                                                                                           |      |       |      |      |   |   | 2 | FTGSFDDDDPDPHR                     | 1 |
|                                                                                                                                                                                                                                                                              | 0.00 | 8.54  | 2.18 | 0.00 | 1 | 4 | 2 | M[147]ASPSGKGAR                    | 1 |
|                                                                                                                                                                                                                                                                              |      |       |      |      |   |   | 2 | ALEAPGC[339]GPRPLAR                | 1 |
|                                                                                                                                                                                                                                                                              |      |       |      |      |   |   | 2 | ALEAPGC[330]GPR                    | 1 |
|                                                                                                                                                                                                                                                                              |      |       |      |      |   |   | 2 | QKFTRAVK                           | 1 |
| K0971_HUMAN (Q9NYY8) Protein KIAA0971 [MASS=81462]                                                                                                                                                                                                                           | *    | 0.85  | *    | *    | * | 1 | 1 | GFLAM[147]K                        | 1 |
| K1576_HUMAN (Q9HCJ6) Probable oxidoreductase KIAA1576 (EC 1.-.-) [MASS=45899]                                                                                                                                                                                                | *    | 5.01  | *    | *    | * | 2 | 2 | SWWQVEKVNPIK                       | 1 |
|                                                                                                                                                                                                                                                                              |      |       |      |      |   |   | 1 | QGNIDNPPK                          | 1 |
| K1688_HUMAN (Q9C0H5) Protein KIAA1688 [MASS=121285]                                                                                                                                                                                                                          | *    | 1.02  | *    | *    | * | 1 | 3 | HVKKEAC[339]ELFK                   | 1 |
| KAC_HUMAN (P01834) Ig kappa chain C region [MASS=11609]                                                                                                                                                                                                                      | 0.98 | 15.09 | 0.88 | 0.00 | 1 | 1 | 2 | SGTASVVC[330]LLNNFYPR              | 1 |
| KAP3_HUMAN (P31323) cAMP-dependent protein kinase type II-beta regulatory subunit [MASS=46215]                                                                                                                                                                               | 0.42 | 5.04  | 0.37 | 0.00 | 1 | 2 | 3 | LLGPC[339]M[147]EIMKR              | 1 |
|                                                                                                                                                                                                                                                                              |      |       |      |      |   |   | 2 | LLGPC[330]M[147]EIM[147]K          | 1 |

|                                                                                                                                                                                                                                                                               |      |       |      |      |   |   |   |                                                |   |
|-------------------------------------------------------------------------------------------------------------------------------------------------------------------------------------------------------------------------------------------------------------------------------|------|-------|------|------|---|---|---|------------------------------------------------|---|
| KBTB3_HUMAN (Q8NAB2) Kelch repeat and BTB domain-containing protein 3 (BTB and kelch domain-containing protein 3) [MASS=69395]                                                                                                                                                | 0.00 | 3.12  | 0.68 | 0.00 | 1 | 1 | 3 | C[330]VQGSGLFPDARPSTTEK                        | 1 |
| KBTB6_HUMAN (Q86V97) Kelch repeat and BTB domain-containing protein 6 [MASS=76137]                                                                                                                                                                                            | 0.00 | 3.12  | 0.50 | 0.00 | 1 | 1 | 3 | KYC[330]LDVIEGALQM[147]RYGDLLYK                | 1 |
| KC1AL_HUMAN (Q8N752) Casein kinase I isoform alpha-like (EC 2.7.11.1) (CKI-alpha-like) (CK1) [MASS=39072]                                                                                                                                                                     | 0.00 | 7.42  | 0.59 | 0.00 | 1 | 1 | 3 | KM[147]STPVEVLC[330]KGFPAEFAM[147]YLNVC[330]JR | 1 |
| KC1A_HUMAN (P48729) Casein kinase I isoform alpha (EC 2.7.11.1) (CKI-alpha) (CK1) [MASS=38915]                                                                                                                                                                                | 0.00 | 7.12  | *    | *    | * | 2 | 3 | MASSSGSKAEFIVGGK                               | 1 |
|                                                                                                                                                                                                                                                                               |      |       |      |      |   |   | 1 | TKSNMKGF                                       | 1 |
| KCC2A_HUMAN (Q9UQM7) Calcium/calmodulin-dependent protein kinase type II alpha chain (EC 2.7.11.17) (CaM-kinase II alpha chain) (CaM kinase II alpha subunit) (CaMK-II subunit alpha) [MASS=54029]                                                                            | 1.00 | 13.39 | 1.15 | 0.03 | 4 | 3 | 3 | MC[339]DPGM[147]TAFEPEALGNLVEGLDFHR            | 1 |
|                                                                                                                                                                                                                                                                               |      |       |      |      |   |   | 3 | EYYSEADASHC[339]QQILEAVLHC[339]HQMGVVHR        | 1 |
|                                                                                                                                                                                                                                                                               |      |       |      |      |   |   | 2 | STVASC[330]MHR                                 | 1 |
|                                                                                                                                                                                                                                                                               |      |       |      |      |   |   | 3 | M[147]C[339]DPGM[147]TAFEPEALGNLVEGLDFHR       | 2 |
| KCC2B_HUMAN (Q13554) Calcium/calmodulin-dependent protein kinase type II beta chain (EC 2.7.11.17) (CaM-kinase II beta chain) (CaM kinase II subunit beta) (CaMK-II subunit beta) [MASS=72726]                                                                                | 1.00 | 6.17  | 1.21 | 0.00 | 2 | 3 | 1 | RGS GAR                                        | 1 |
|                                                                                                                                                                                                                                                                               |      |       |      |      |   |   | 3 | IC[339]DPGLTSFEPEALGNLVEGM[147]DFHR            | 1 |
|                                                                                                                                                                                                                                                                               |      |       |      |      |   |   | 2 | LC[339]TGHEYAAK                                | 1 |
| KCC2G_HUMAN (Q13555) Calcium/calmodulin-dependent protein kinase type II gamma chain (EC 2.7.11.17) (CaM-kinase II gamma chain) (CaM kinase II gamma subunit) (CaMK-II subunit gamma) [MASS=62609]                                                                            | 1.00 | 4.48  | 0.92 | 0.03 | 2 | 1 | 3 | IC[339]DPGLTSFEPEALGNLVEGMDFHK                 | 1 |
|                                                                                                                                                                                                                                                                               |      |       |      |      |   |   | 3 | IC[339]DPGLTSFEPEALGNLVEGM[147]DFHK            | 1 |
| KCMA1_HUMAN (Q12791) Calcium-activated potassium channel subunit alpha 1 (Calcium-activated potassium channel, subfamily M subunit alpha 1) (Maxi K channel) (MaxiK) (BK channel) (K(VCA)alpha) (BKCA alpha) (KCa1.1) (Slowpoke homolog) (Slo homolog) (Slo-al) [MASS=137559] | *    | 3.48  | *    | *    | * | 2 | 2 | QRNGGM[147]RNSPNTSPK                           | 1 |
|                                                                                                                                                                                                                                                                               |      |       |      |      |   |   | 3 | AVNINLC[330]DM[147]C[330]VILSANQNNIDDTSLQDK    | 1 |

|                                                                                                                                                                                                                                                     |      |       |      |      |    |   |   |                                       |   |
|-----------------------------------------------------------------------------------------------------------------------------------------------------------------------------------------------------------------------------------------------------|------|-------|------|------|----|---|---|---------------------------------------|---|
| KCND3_HUMAN (Q9UK17) Potassium voltage-gated channel subfamily D member 3 (Voltage-gated potassium channel subunit Kv4.3) [MASS=73451]                                                                                                              | 0.00 | 2.44  | 0.55 | 0.00 | 1  | 1 | 2 | SSLNLKADDGLRPNC[330]K                 | 1 |
| KCNH1_HUMAN (O95259) Potassium voltage-gated channel subfamily H member 1 (Voltage-gated potassium channel subunit Kv10.1) (Ether-a-go-go potassium channel 1) (hEAG1) (h-eag) [MASS=111422]                                                        | *    | 1.21  | *    | *    | *  | 2 | 1 | GIDTEK                                | 1 |
|                                                                                                                                                                                                                                                     |      |       |      |      |    |   | 1 | GENVHK                                | 2 |
| KCNH3_HUMAN (Q9ULD8) Potassium voltage-gated channel subfamily H member 3 (Voltage-gated potassium channel subunit Kv12.2) (Ether-a-go-go-like potassium channel 2) (ELK channel 2) (ELK2) (Brain-specific eag-like channel 1) (BEC1) [MASS=117128] | 0.00 | 2.59  | 2.52 | 0.00 | 1  | 1 | 3 | ATWDGFILLATLYVAVTVPY SVC[339]VSTAR    | 1 |
| KCNQ5_HUMAN (Q9NR82) Potassium voltage-gated channel subfamily KQT member 5 (Voltage-gated potassium channel subunit Kv7.5) (Potassium channel subunit alpha KvLQT5) (KQT-like 5) [MASS=99024]                                                      | 0.00 | 1.78  | 1.69 | 0.00 | 1  | 1 | 2 | DVIEQYSAGHLDM[147]LC[339]R            | 1 |
|                                                                                                                                                                                                                                                     |      |       |      |      |    |   | 3 | SKDYEFM[147]WNPHLGYILTC[339]PSNLGTGLR | 1 |
|                                                                                                                                                                                                                                                     |      |       |      |      |    |   | 2 | FC[339]TGLTQIETL FK                   | 4 |
|                                                                                                                                                                                                                                                     |      |       |      |      |    |   | 2 | FC[330]TGLTQIETL FK                   | 5 |
| KCRB_HUMAN (P12277) Creatine kinase B-type (EC 2.7.3.2) (Creatine kinase B chain) (B-CK) [MASS=42644]                                                                                                                                               | 1.00 | 13.12 | 1.41 | 0.10 | 13 | 3 | 2 | GFC[330]LPPHC[330]SR                  | 1 |
|                                                                                                                                                                                                                                                     |      |       |      |      |    |   | 1 | GFC[330]LPPHC[330]SR                  | 1 |
|                                                                                                                                                                                                                                                     |      |       |      |      |    |   | 2 | GFC[339]LPPHC[339]SR                  | 1 |
| KCRS_HUMAN (P17540) Creatine kinase, sarcomeric mitochondrial precursor (EC 2.7.3.2) (S-MtCK) (Mib-CK) (Basic-type mitochondrial creatine kinase) [MASS=47520]                                                                                      | *    | 3.10  | *    | *    | *  | 1 | 3 | PVSPLLTC[339]AGM[147]AR               | 1 |

|                                                                                                                                                                                                                     |      |       |      |      |   |   |   |                                  |   |
|---------------------------------------------------------------------------------------------------------------------------------------------------------------------------------------------------------------------|------|-------|------|------|---|---|---|----------------------------------|---|
| KCRU_HUMAN (P12532) Creatine kinase, ubiquitous mitochondrial precursor (EC 2.7.3.2) (U-MtCK) (Mia-CK) (Acidic-type mitochondrial creatine kinase) [MASS=47036]                                                     | 1.00 | 14.87 | 1.37 | 0.06 | 5 | 3 | 2 | HNNC[330]M[147]ASHLTPAVYAR       | 1 |
|                                                                                                                                                                                                                     |      |       |      |      |   |   | 2 | SEVELVQLVIDGVNYLIDC[330]ER       | 1 |
|                                                                                                                                                                                                                     |      |       |      |      |   |   | 3 | HNNC[339]M[147]ASHLTPAVYAR       | 1 |
|                                                                                                                                                                                                                     |      |       |      |      |   |   | 3 | TTPTGWTLDQC[339]IQTGVDNPGHPFIK   | 1 |
|                                                                                                                                                                                                                     |      |       |      |      |   |   | 2 | SEVELVQLVIDGVNYLIDC[339]ER       | 1 |
| KEAP1_HUMAN (Q14145) Kelch-like ECH-associated protein 1 (Cytosolic inhibitor of Nrf2) (Kelch-like protein 19) [MASS=69665]                                                                                         | 0.00 | 3.04  | 5.43 | 0.00 | 1 | 1 | 3 | M[147]TSGRSGVGVAVTMEPC[339]RK    | 1 |
| KI21A_HUMAN (Q7Z4S6) Kinesin family member 21A (Kinesin-like protein KIF2) (NY-REN-62 antigen) [MASS=187178]                                                                                                        | *    | 2.03  | *    | *    | * | 2 | 2 | NLQDGGQISDTGDLGEDIASN            | 1 |
|                                                                                                                                                                                                                     |      |       |      |      |   |   | 2 | VWNMDTFMPVGENK                   | 1 |
| KIF17_HUMAN (Q9P2E2) Kinesin-like protein KIF17 (KIF3-related motor protein) [MASS=115113]                                                                                                                          | *    | 2.72  | *    | *    | * | 2 | 2 | PKVFSTTDLPSDDVSK                 | 1 |
|                                                                                                                                                                                                                     |      |       |      |      |   |   | 3 | C[339]QPVVTVDC[339]AR            | 1 |
| KIFA3_HUMAN (Q92845) Kinesin-associated protein 3 (Smg GDS-associated protein) [MASS=91205]                                                                                                                         | *    | 1.39  | *    | *    | * | 1 | 2 | FKDPLLKMKIR                      | 1 |
| KKCC2_HUMAN (Q96RR4) Calcium/calmodulin-dependent protein kinase kinase 2 (EC 2.7.11.17) (Calcium/calmodulin-dependent protein kinase kinase beta) (CaM-kinase kinase beta) (CaM-KK beta) (CaMKK beta) [MASS=64731] | 0.23 | 2.21  | 1.13 | 0.01 | 2 | 1 | 2 | GTRPAPGGC[330]IQPR               | 1 |
|                                                                                                                                                                                                                     |      |       |      |      |   |   | 2 | GTRPAPGGC[339]IQPR               | 1 |
| KLD8A_HUMAN (Q8IYD2) Kelch domain-containing protein 8A [MASS=38899]                                                                                                                                                | *    | 2.29  | *    | *    | * | 1 | 2 | RLAPLPSR                         | 1 |
| KLHL7_HUMAN (Q8IXQ5) Kelch-like protein 7 [MASS=66005]                                                                                                                                                              | 0.00 | 6.48  | 0.92 | 0.00 | 1 | 4 | 2 | KM[147]C[330]VDFLK               | 1 |
|                                                                                                                                                                                                                     |      |       |      |      |   |   | 1 | KTEKK                            | 1 |
|                                                                                                                                                                                                                     |      |       |      |      |   |   | 3 | HDYRIALFGGSQPQSC[330]R           | 1 |
|                                                                                                                                                                                                                     |      |       |      |      |   |   | 2 | M[147]AASGVEK                    | 1 |
| KNTC1_HUMAN (P50748) Kinetochore-associated protein 1 (Rough deal homolog) (hRod) (HsROD) (Rod) [MASS=250747]                                                                                                       | *    | 0.45  | *    | *    | * | 1 | 2 | KEFGILAKTK                       | 1 |
| KPYM_HUMAN (P14618) Pyruvate kinase isozymes M1/M2 (EC 2.7.1.40) (Pyruvate kinase muscle isozyme) (Cytosolic thyroid hormone-binding protein) (CTHBP) (THBP1) [MASS=57805]                                          | 1.00 | 10.00 | 0.99 | 0.12 | 2 | 3 | 2 | NTGIIC[339]TIGPASR               | 1 |
|                                                                                                                                                                                                                     |      |       |      |      |   |   | 3 | RLAPITSDPTEATAVGAVEASFK          | 1 |
|                                                                                                                                                                                                                     |      |       |      |      |   |   | 2 | AGKPVIC[330]ATQM[147]LESM[147]IK | 1 |

|                                                                                                                                                                                                             |      |      |      |      |   |   |                                                                                 |                   |   |
|-------------------------------------------------------------------------------------------------------------------------------------------------------------------------------------------------------------|------|------|------|------|---|---|---------------------------------------------------------------------------------|-------------------|---|
| L1CAM_HUMAN (P32004) Neural cell adhesion molecule L1 precursor (N-CAM L1) (CD171 antigen) [MASS=140002]                                                                                                    | *    | 0.95 | *    | *    | * | 1 | 2                                                                               | WLRPSGPM[147]PADR | 1 |
| L2GL2_HUMAN (Q6P1M3) Lethal(2) giant larvae protein homolog 2 (HGL) [MASS=113447]                                                                                                                           | 0.00 | 3.14 | 0.93 | 0.00 | 1 | 2 | 2 REDVSGIASC[339]VFTK<br>3 QPGLVMERALLSDERVLK                                   | 1<br>1            |   |
| LAMA1_HUMAN (P25391) Laminin alpha-1 chain precursor (Laminin A chain) [MASS=337156]                                                                                                                        | 0.00 | 1.79 | 1.13 | 0.00 | 1 | 3 | 3 SLDGTTFSPWQYYAVSDSEC[339]LSR<br>3 NLSEIKLLISQARK<br>2 VKVM[147]TDLGSGPITLLTDR | 1<br>1<br>1       |   |
| LAMA3_HUMAN (Q16787) Laminin alpha-3 chain precursor (Epiligrin 170 kDa subunit) (E170) (Nicein subunit alpha) [MASS=189304]                                                                                | 0.00 | 2.28 | 0.31 | 0.00 | 1 | 2 | 3 NQLLNYSAISNHGSKIEGLER<br>3 C[330]AVDAATAYENILNAIK                             | 1<br>1            |   |
|                                                                                                                                                                                                             |      |      |      |      |   |   | 2 FVMYMGSRQATGDYMGVSLR<br>2 C[330]DRC[339]QEGHFGFNGC[339]GGC[339]R<br>1 LLGPQR  | 1<br>1<br>7       |   |
| LAMA5_HUMAN (O15230) Laminin alpha-5 chain precursor [MASS=399709]                                                                                                                                          | *    | 1.19 | *    | *    | * | 3 |                                                                                 |                   |   |
| LAMC3_HUMAN (Q9Y6N6) Laminin gamma-3 chain precursor (Laminin 12 gamma 3 subunit) [MASS=172051]                                                                                                             | 0.00 | 2.21 | 2.61 | 0.00 | 1 | 2 | 3 C[330]KC[330]NGHASEC[330]GPDVAGQLAC[339]R<br>3 C[339]HPLGSQEDQC[339]HPK       | 1<br>1            |   |
| LARP4_HUMAN (Q71RC2) La-related protein 4 (La ribonucleoprotein domain family member 4) [MASS=80467]                                                                                                        | 0.00 | 4.98 | 2.33 | 0.00 | 1 | 2 | 3 ASTASPC[339]NNNINAATAVALQEPR<br>2 SSPM[147]VQVDEKGEK                          | 1<br>1            |   |
| LAT3_HUMAN (O75387) Large neutral amino acids transporter small subunit 3 (L-type amino acid transporter 3) (Solute carrier family 43 member 1) (Prostate cancer overexpressed gene 1 protein) [MASS=61477] | 0.00 | 3.22 | 0.78 | 0.00 | 1 | 1 | 3 IKDC[330]VDAPTQGTVLGDAR                                                       | 1                 |   |
| LBXCO_HUMAN (P84550) Ladybird homeobox corepressor 1 [MASS=99830]                                                                                                                                           | *    | 3.52 | *    | *    | * | 2 | 2 RAGAMPISRR<br>2 GLGLATGASGPAGPGGGAGVVR<br>1 DLNPDIGTDK                        | 1<br>1<br>6       |   |
| LDH6A_HUMAN (Q6ZMR3) L-lactate dehydrogenase A-like 6A (EC 1.1.1.27) [MASS=36507]                                                                                                                           | *    | 3.01 | *    | *    | * | 1 |                                                                                 |                   |   |



|                                                                                                                                                                                |      |       |      |      |   |   |                                                                                         |                                |   |
|--------------------------------------------------------------------------------------------------------------------------------------------------------------------------------|------|-------|------|------|---|---|-----------------------------------------------------------------------------------------|--------------------------------|---|
| LDHB_HUMAN (P07195) L-lactate dehydrogenase B chain (EC 1.1.1.27) (LDH-B) (LDH heart subunit) (LDH-H) (NY-REN-46 antigen) [MASS=36507]                                         | 0.94 | 6.01  | 0.81 | 0.00 | 1 | 1 | 2                                                                                       | GM[147]YGIENEVFLSLPC[330]ILNAR | 1 |
| LDLR_HUMAN (P01130) Low-density lipoprotein receptor precursor (LDL receptor) [MASS=95376]                                                                                     | *    | 1.40  | *    | *    | * | 1 | 2                                                                                       | C[339]ISRQFVC[330]DSDR         | 1 |
| LIPA2_HUMAN (O75334) Liprin-alpha-2 (Protein tyrosine phosphatase receptor type f polypeptide-interacting protein alpha-2) (PTPRF-interacting protein alpha-2) [MASS=143141]   | 0.00 | 3.02  | 1.14 | 0.00 | 1 | 2 | 2 ETQESLSLAQQRLQDVIYDR<br>2 MMC[330]EVMPTINEDTPMSQR                                     | 1<br>1                         |   |
| LMIP_HUMAN (P55344) Lens fiber membrane intrinsic protein (MP18) (MP19) (MP20) [MASS=19674]                                                                                    | 0.00 | 15.61 | 2.58 | 0.00 | 1 | 1 | 3 FSWSYILGWVAVLMTFFAGIFYM[147]C[339]AYR                                                 | 1                              |   |
| LPPRC_HUMAN (P42704) 130 kDa leucine-rich protein (LRP 130) (GP130) (Leucine-rich PPR motif-containing protein) [MASS=145200]                                                  | 1.00 | 2.99  | 1.07 | 0.01 | 3 | 2 | 2 C[339]GAIAEQTPILLFLLR<br>3 EVQM[147]HSFPLQFTLHC[339]ALLANK<br>2 C[330]GAIAEQTPILLFLLR | 1<br>1<br>1                    |   |
| LRBA_HUMAN (P50851) Lipopolysaccharide-responsive and beige-like anchor protein (CDC4-like protein) (Beige-like protein) [MASS=319159]                                         | 0.00 | 2.13  | 0.16 | 0.00 | 1 | 4 | 3 SIFSRRYLLQNTALEIFMANR<br>2 TLEGPENC[330]LKPK<br>3 GLDGPRPNQKEMLSLR<br>2 AESDLFLAEHHK  | 1<br>1<br>1<br>1               |   |
| LRC41_HUMAN (Q15345) Leucine-rich repeat-containing protein 41 (Protein Muf1) [MASS=92287]                                                                                     | 0.75 | 3.91  | 1.33 | 0.00 | 1 | 2 | 3 HVRQLTIC[330]NM[147]LQGATELVAEPNRR<br>2 PDGLLEFAK                                     | 1<br>1                         |   |
| LRC57_HUMAN (Q8N9N7) Leucine-rich repeat-containing protein 57 [MASS=26754]                                                                                                    | *    | 17.57 | *    | *    | * | 2 | 2 ELEGYDKYM[147]ERFTATK<br>3 KLETLSLNNHRLRELSTFGQLSALK                                  | 1<br>1                         |   |
| LRC8E_HUMAN (Q6NSJ5) Leucine-rich repeat-containing protein 8E [MASS=90277]                                                                                                    | 0.22 | 1.88  | 0.16 | 0.00 | 1 | 1 | 3 LETLPSQLGLC[330]SGLR                                                                  | 1                              |   |
| LRIG3_HUMAN (Q6UXM1) Leucine-rich repeats and immunoglobulin-like domains protein 3 precursor (LIG-3) [MASS=123433]                                                            | *    | 0.71  | *    | *    | * | 1 | 2 RLILQGNR                                                                              | 1                              |   |
| LRP1B_HUMAN (Q9NZR2) Low-density lipoprotein receptor-related protein 1B precursor (Low-density lipoprotein receptor-related protein-deleted in tumor) (LRP-DIT) [MASS=515496] | *    | 0.43  | *    | *    | * | 2 | 3 GPC[330]SHM[147]C[339]LINHNR<br>1 SLSRAHK                                             | 1<br>1                         |   |

|                                                                                                                                                                                                                                                                                  |      |      |      |      |   |   |   |                                          |   |
|----------------------------------------------------------------------------------------------------------------------------------------------------------------------------------------------------------------------------------------------------------------------------------|------|------|------|------|---|---|---|------------------------------------------|---|
| LRP2_HUMAN (P98164) Low-density lipoprotein receptor-related protein 2 precursor (Megalin) (Glycoprotein 330) (gp330) [MASS=521928]                                                                                                                                              | *    | 0.56 | *    | *    | * | 2 | 2 | VTLITENLGHPR                             | 1 |
|                                                                                                                                                                                                                                                                                  |      |      |      |      |   |   | 3 | LDGLFVSDLNGGHR                           | 1 |
| LRP4_HUMAN (O75096) Low-density lipoprotein receptor-related protein 4 precursor (Multiple epidermal growth factor-like domains 7) [MASS=215964]                                                                                                                                 | *    | 1.13 | *    | *    | * | 1 | 3 | VYWTDGTNRNIEVGNLDGSM[147]RK              | 1 |
| LRRK1_HUMAN (Q38SD2) Leucine-rich repeat serine/threonine-protein kinase 1 (EC 2.7.11.1) [MASS=227842]                                                                                                                                                                           | 0.00 | 3.04 | 0.86 | 0.00 | 1 | 3 | 2 | LQKLTASKNC[330]LEK                       | 1 |
|                                                                                                                                                                                                                                                                                  |      |      |      |      |   |   | 3 | GWGAREFDIFYQSYEELGR                      | 1 |
|                                                                                                                                                                                                                                                                                  |      |      |      |      |   |   | 3 | SLEGQEGLRQLIFHVTC[330]SMKDVGSTIGC[339]QR | 1 |
| LTK_HUMAN (P29376) Leukocyte tyrosine kinase receptor precursor (EC 2.7.10.1) (Protein tyrosine kinase 1) [MASS=91653]                                                                                                                                                           | 0.00 | 2.66 | 0.21 | 0.00 | 1 | 1 | 3 | TLPELC[330]SPQDELDFLM[147]EALIISK        | 1 |
| LUZP1_HUMAN (Q86V48) Leucine zipper protein 1 [MASS=120274]                                                                                                                                                                                                                      | *    | 1.67 | *    | *    | * | 1 | 3 | NDC[339]TQLC[339]LSLNEERNLTK             | 1 |
| LY75_HUMAN (O60449) Lymphocyte antigen 75 precursor (DEC-205) (gp200-MR6) (CD205 antigen) [MASS=198270]                                                                                                                                                                          | 0.00 | 1.68 | 1.87 | 0.00 | 1 | 2 | 3 | SGVGRC[339]SMLIASNETWKK                  | 1 |
|                                                                                                                                                                                                                                                                                  |      |      |      |      |   |   | 2 | SVGKWEVKDC[339]R                         | 1 |
| LYPA1_HUMAN (O75608) Acyl-protein thioesterase 1 (EC 3.1.2.-) (Lysophospholipase 1) (Lysophospholipase I) [MASS=24669]                                                                                                                                                           | 0.00 | 7.83 | 7.58 | 0.00 | 1 | 1 | 3 | M[147]C[339]GNNMSTPLPAIVPAAR             | 1 |
| M3K14_HUMAN (Q99558) Mitogen-activated protein kinase kinase kinase 14 (EC 2.7.11.25) (NF-kappa beta-inducing kinase) (Serine/threonine-protein kinase NIK) (HsNIK) [MASS=104041]                                                                                                | *    | 2.75 | *    | *    | * | 2 | 1 | NTPQFTK                                  | 1 |
|                                                                                                                                                                                                                                                                                  |      |      |      |      |   |   | 3 | EPSPKTEDNEGVLLEKLK                       | 1 |
| M4K2_HUMAN (Q12851) Mitogen-activated protein kinase kinase kinase kinase 2 (EC 2.7.11.1) (MAPK/ERK kinase kinase kinase 2) (MEK kinase kinase 2) (MEKKK 2) (Germinal center kinase) (GC kinase) (Rab8-interacting protein) (B lymphocyte serine/threonine-protein) [MASS=91585] | *    | 0.73 | *    | *    | * | 1 | 1 | VLGAHR                                   | 1 |
| MACF4_HUMAN (Q96PK2) Microtubule-actin crosslinking factor 1, isoform 4 [MASS=670146]                                                                                                                                                                                            | *    | 0.19 | *    | *    | * | 1 | 2 | ALEKDAKNLQK                              | 1 |

|                                                                                                                                                                                                                                                                             |                 |       |      |      |   |   |   |                                |   |
|-----------------------------------------------------------------------------------------------------------------------------------------------------------------------------------------------------------------------------------------------------------------------------|-----------------|-------|------|------|---|---|---|--------------------------------|---|
| MAGB5_HUMAN (Q9BZ81) Melanoma-associated antigen B5 (MAGE-B5 antigen) (Fragment) [MASS=13018]                                                                                                                                                                               | 0.00            | 18.02 | 1.33 | 0.00 | 1 | 1 | 3 | TGLLM[147]TFLVVIFLKGNC[339]ANK | 1 |
| MALT1_HUMAN (Q9UDY8) Mucosa-associated lymphoid tissue lymphoma translocation protein 1 (EC 3.4.22.-) (MALT lymphoma-associated translocation) (Paracaspase) [MASS=92272]                                                                                                   | *               | 2.06  | *    | *    | * | 1 | 2 | NLQWAKAHELPEM[147]C[339]LK     | 1 |
| MAON_HUMAN (Q16798) NADP-dependent malic enzyme, mitochondrial precursor (EC 1.1.1.40) (NADP-ME) (Malic enzyme 3) [MASS=67054]                                                                                                                                              | 0.96            | 3.15  | 0.91 | 0.00 | 1 | 1 | 2 | FGINC[330]LIQFEDFANANAFR       | 1 |
| MAP2_HUMAN (P11137) Microtubule-associated protein 2 (MAP 2) (MAP-2) [MASS=199538]                                                                                                                                                                                          | 0.98            | 2.57  | 0.82 | 0.00 | 1 | 3 | 2 | YTRPTHLSLC[330]VK              | 1 |
|                                                                                                                                                                                                                                                                             |                 |       |      |      |   |   | 2 | PSSILPPRRGVSGDR                | 1 |
|                                                                                                                                                                                                                                                                             |                 |       |      |      |   |   | 3 | VQAKVGSLDNAHHVPGGGNVK          | 1 |
|                                                                                                                                                                                                                                                                             |                 |       |      |      |   |   | 2 | ATGTFDNEIVMM[147]NHVYR         | 1 |
|                                                                                                                                                                                                                                                                             |                 |       |      |      |   |   | 2 | SGNRKSLVVGTPSPTLSR             | 1 |
| 2                                                                                                                                                                                                                                                                           | LGTGERLDGEAGR   | 1     |      |      |   |   |   |                                |   |
| 2                                                                                                                                                                                                                                                                           | PSSLSADTAALSHAR | 1     |      |      |   |   |   |                                |   |
| MAST3_HUMAN (O60307) Microtubule-associated serine/threonine-protein kinase 3 (EC 2.7.11.1) [MASS=143136]                                                                                                                                                                   | *               | 4.89  | *    | *    | * | 4 |   |                                |   |
| MCAT_HUMAN (O43772) Mitochondrial carnitine/acylcarnitine carrier protein (Carnitine/acylcarnitine translocase) (CAC) (Solute carrier family 25 member 20) [MASS=32944]                                                                                                     | 0.97            | 4.32  | 0.82 | 0.00 | 1 | 1 | 2 | C[330]LLQIQASSGESK             | 1 |
| MCCA_HUMAN (Q96RQ3) Methylcrotonoyl-CoA carboxylase subunit alpha, mitochondrial precursor (EC 6.4.1.4) (3-methylcrotonyl-CoA carboxylase 1) (MCCase alpha subunit) (3-methylcrotonyl-CoA:carbon dioxide ligase subunit alpha) (3-methylcrotonyl-CoA carboxyla [MASS=80473] | 1.00            | 1.79  | 0.99 | 0.00 | 2 | 1 | 2 | ESLC[339]QAALGLILK             | 1 |
|                                                                                                                                                                                                                                                                             |                 |       |      |      |   |   | 2 | ESLC[330]QAALGLILK             | 1 |
| MCCC2_HUMAN (Q9HCC0) Methylcrotonoyl-CoA carboxylase beta chain, mitochondrial precursor (EC 6.4.1.4) (3-Methylcrotonyl-CoA carboxylase 2) (MCCase subunit beta) (3-methylcrotonyl-CoA:carbon dioxide ligase subunit beta) (3-Methylcrotonyl-CoA carboxylase n [MASS=61333] | 0.99            | 11.19 | 1.25 | 0.00 | 1 | 4 | 3 | EYEAEGIAKDGAKMVAAVAC[330]AQVPK | 1 |
|                                                                                                                                                                                                                                                                             |                 |       |      |      |   |   | 2 | LPC[339]IYLVDSGGAYLPR          | 1 |
|                                                                                                                                                                                                                                                                             |                 |       |      |      |   |   | 3 | KQLRAQEIAMQNR                  | 1 |
|                                                                                                                                                                                                                                                                             |                 |       |      |      |   |   | 2 | AQEIAMQNR                      | 1 |

|                                                                                                                                                   |      |       |      |      |    |   |   |                                            |   |
|---------------------------------------------------------------------------------------------------------------------------------------------------|------|-------|------|------|----|---|---|--------------------------------------------|---|
| MCF2L_HUMAN (O15068) Guanine nucleotide exchange factor DBS (DBL's big sister) (MCF2-transforming sequence-like protein) (Fragment) [MASS=123983] | 0.60 | 4.24  | 0.92 | 0.00 | 1  | 3 | 2 | AKSEMSESRQGR                               | 1 |
|                                                                                                                                                   |      |       |      |      |    |   | 2 | C[330]FLERM[147]EDFQIYEKYC[330]QNK         | 1 |
|                                                                                                                                                   |      |       |      |      |    |   | 2 | WC[339]DEGIYLLASQPVDK                      | 1 |
| MCM3A_HUMAN (O60318) 80 kDa MCM3-associated protein (GANP protein) [MASS=218403]                                                                  | *    | 4.04  | *    | *    | *  | 3 | 2 | VAHGALSDGAIDAVETQK                         | 1 |
|                                                                                                                                                   |      |       |      |      |    |   | 3 | DC[339]EEVGSAGAAYAAAALGVSNAAMEDLLTAATTGILR | 1 |
|                                                                                                                                                   |      |       |      |      |    |   | 3 | SEDMAEEDVYWLSALLQLKQLLQAK                  | 1 |
| MCM6_HUMAN (Q14566) DNA replication licensing factor MCM6 (p105MCM) [MASS=92889]                                                                  | 0.00 | 2.56  | 0.92 | 0.00 | 1  | 1 | 3 | NLYHNLC[330]TSLFPTIHGNDEVK                 | 1 |
|                                                                                                                                                   |      |       |      |      |    |   | 3 | GYLGPEQLPDC[339]LKGC[339]DVVVIPAGVPR       | 1 |
|                                                                                                                                                   |      |       |      |      |    |   | 1 | GYLGPEQLPDC[339]LK                         | 1 |
|                                                                                                                                                   |      |       |      |      |    |   | 2 | TIIP LISQC[339]TPK                         | 3 |
|                                                                                                                                                   |      |       |      |      |    |   | 2 | SQETEC[339]TYFSTPLLLGK                     | 3 |
|                                                                                                                                                   |      |       |      |      |    |   | 2 | GYLGPEQLPDC[339]LK                         | 2 |
| MDHM_HUMAN (P40926) Malate dehydrogenase, mitochondrial precursor (EC 1.1.1.37) [MASS=35531]                                                      | 1.00 | 26.92 | 1.33 | 0.08 | 20 | 6 | 2 | GYLGPEQLPDC[330]LK                         | 1 |
|                                                                                                                                                   |      |       |      |      |    |   | 1 | GYLGPEQLPDC[330]LK                         | 1 |
|                                                                                                                                                   |      |       |      |      |    |   | 2 | GC[330]DVVVIPAGVPR                         | 1 |
|                                                                                                                                                   |      |       |      |      |    |   | 2 | GC[339]DVVVIPAGVPR                         | 1 |
|                                                                                                                                                   |      |       |      |      |    |   | 1 | TIIP LISQC[339]TPK                         | 3 |
|                                                                                                                                                   |      |       |      |      |    |   | 2 | EGVVEC[339]SFVK                            | 1 |
|                                                                                                                                                   |      |       |      |      |    |   | 2 | SQETEC[330]TYFSTPLLLGK                     | 1 |
|                                                                                                                                                   |      |       |      |      |    |   | 1 | EGVVEC[339]SFVK                            | 2 |
|                                                                                                                                                   |      |       |      |      |    |   | 1 | TIIP LISQC[330]TPK                         | 1 |
| MDN1_HUMAN (Q9NU22) Midasin (MIDAS-containing protein) [MASS=632816]                                                                              | *    | 1.23  | *    | *    | *  | 3 | 3 | PPQLLKVQLGDQTD SKM[147]LLGMYR              | 1 |
|                                                                                                                                                   |      |       |      |      |    |   | 3 | EVQTVSEHIQNC[339]LGSQTGGFAGIKK             | 1 |
|                                                                                                                                                   |      |       |      |      |    |   | 2 | LLSVLAQVFTELAQKGFC[330]LPK                 | 1 |
| MDR1_HUMAN (P08183) Multidrug resistance protein 1 (EC 3.6.3.44) (P-glycoprotein 1) (CD243 antigen) [MASS=141461]                                 | 0.00 | 3.28  | 0.63 | 0.00 | 1  | 3 | 1 | KNFFK                                      | 1 |
|                                                                                                                                                   |      |       |      |      |    |   | 3 | EGRTC[330]IVIAHRLSTIQNADLIVVFQNGR          | 1 |
|                                                                                                                                                   |      |       |      |      |    |   | 2 | LANDAAQVK                                  | 1 |
| MDR3_HUMAN (P21439) Multidrug resistance protein 3 (EC 3.6.3.44) (P-glycoprotein 3) [MASS=140681]                                                 | 0.00 | 1.09  | *    | *    | *  | 1 | 2 | AKLSAAHLFM[147]LFER                        | 1 |

|                                                                                                                                                                                                       |      |       |      |      |   |   |   |                                    |   |
|-------------------------------------------------------------------------------------------------------------------------------------------------------------------------------------------------------|------|-------|------|------|---|---|---|------------------------------------|---|
| MGST3_HUMAN (O14880) Microsomal glutathione S-transferase 3 (EC 2.5.1.18) (Microsomal GST-3) (Microsomal GST-III) [MASS=16516]                                                                        | 1.00 | 30.26 | 1.29 | 0.05 | 2 | 2 | 3 | VEYPIM[147]YSTDPENGHIFNC[330]IQR   | 1 |
|                                                                                                                                                                                                       |      |       |      |      |   |   | 3 | YKVEYPIM[147]YSTDPENGHIFNC[339]IQR | 1 |
| MICA3_HUMAN (Q7RTP6) Protein MICAL-3 [MASS=109910]                                                                                                                                                    | 0.00 | 1.74  | 0.54 | 0.00 | 1 | 1 | 2 | KFYGKFC[330]AGAIDHSIR              | 1 |
| MIRO1_HUMAN (Q8IXI2) Mitochondrial Rho GTPase 1 (EC 3.6.5.-) (MIRO-1) (hMiro-1) (Ras homolog gene family member T1) (Rac-GTP-binding protein-like protein) [MASS=70784]                               | 0.97 | 2.27  | 1.00 | 0.00 | 1 | 1 | 2 | DC[339]ALSPDELKDLFK                | 1 |
|                                                                                                                                                                                                       |      |       |      |      |   |   | 1 | SC[339]HK                          | 1 |
| MKLN1_HUMAN (Q9UL63) Muskelin [MASS=84767]                                                                                                                                                            | *    | 4.49  | *    | *    | * | 3 | 2 | VHYLFGGNPGKSC[339]SPKMR            | 1 |
|                                                                                                                                                                                                       |      |       |      |      |   |   | 3 | LC[330]RPSKDYLRL                   | 3 |
| MMSA_HUMAN (Q02252) Methylmalonate-semialdehyde dehydrogenase [acylating], mitochondrial precursor (EC 1.2.1.27) (MMSDH) (Malonate-semialdehyde dehydrogenase [acylating]) (EC 1.2.1.18) [MASS=57839] | 0.98 | 6.36  | 1.76 | 0.00 | 1 | 2 | 3 | VC[339]NLIDSGTKEGASILLDGR          | 1 |
|                                                                                                                                                                                                       |      |       |      |      |   |   | 2 | C[339]M[147]ALSTAVLVGEAK           | 1 |
| MOG_HUMAN (Q16653) Myelin-oligodendrocyte glycoprotein precursor [MASS=28179]                                                                                                                         | *    | 3.64  | *    | *    | * | 1 | 2 | VIGPRHPIR                          | 1 |
| MOT8_HUMAN (P36021) Monocarboxylate transporter 8 (MCT 8) (X-linked PEST-containing transporter) (MCT 7) [MASS=66400]                                                                                 | *    | 2.12  | *    | *    | * | 1 | 2 | PLLSSQDTPSKR                       | 1 |
| MP2K5_HUMAN (Q13163) Dual specificity mitogen-activated protein kinase kinase 5 (EC 2.7.12.2) (MAP kinase kinase 5) (MAPKK 5) (MAPK/ERK kinase 5) [MASS=48968]                                        | 0.00 | 4.11  | 1.48 | 0.00 | 1 | 1 | 3 | C[339]DSSYIIGFYGAFFVENR            | 1 |
| MPCP_HUMAN (Q00325) Phosphate carrier protein, mitochondrial precursor (PTP) (Solute carrier family 25 member 3) [MASS=40095]                                                                         | 1.00 | 10.22 | 1.12 | 0.04 | 3 | 3 | 2 | FAC[339]FER                        | 1 |
|                                                                                                                                                                                                       |      |       |      |      |   |   | 2 | GWAPTFLGYSM[147]QGLC[339]K         | 1 |
|                                                                                                                                                                                                       |      |       |      |      |   |   | 2 | LPRPPPEM[147]PESLKK                | 1 |
|                                                                                                                                                                                                       |      |       |      |      |   |   | 2 | GWAPTFLGYSM[147]QGLC[330]K         | 1 |
| MPP9_HUMAN (Q99550) M-phase phosphoprotein 9 [MASS=78084]                                                                                                                                             | *    | 2.60  | *    | *    | * | 1 | 3 | EISGVEDWKITNQILVDR                 | 1 |
| MSH5_HUMAN (O43196) MutS protein homolog 5 [MASS=92875]                                                                                                                                               | 0.00 | 5.64  | 0.78 | 0.00 | 1 | 2 | 3 | LPSMVEASDFEINGLDFMFLSEEK           | 1 |
|                                                                                                                                                                                                       |      |       |      |      |   |   | 3 | IHSC[330]ESISLGLSTFM[147]IDLNQVAK  | 1 |

|                                                                                                                                                                             |                                  |      |      |      |   |   |   |                               |   |
|-----------------------------------------------------------------------------------------------------------------------------------------------------------------------------|----------------------------------|------|------|------|---|---|---|-------------------------------|---|
| MTCH2_HUMAN (Q9Y6C9) Mitochondrial carrier homolog 2 (Met-induced mitochondrial protein) [MASS=33331]                                                                       | 1.00                             | 4.29 | 0.89 | 0.20 | 3 | 1 | 2 | LC[339]SGVLGTVVHGK            | 2 |
|                                                                                                                                                                             |                                  |      |      |      |   |   | 2 | LC[330]SGVLGTVVHGK            | 1 |
| MTMR7_HUMAN (Q9Y216) Myotubularin-related protein 7 (EC 3.1.3.-) [MASS=75806]                                                                                               | 0.00                             | 2.27 | 1.82 | 0.00 | 1 | 1 | 3 | C[339]KNFQIQLIIPQER           | 1 |
| MTX1_HUMAN (Q13505) Metaxin-1 [MASS=35777]                                                                                                                                  | 0.00                             | 5.36 | *    | *    | * | 1 | 2 | WYAEAM[147]PFPLNFFLPGR        | 1 |
| MUC2_HUMAN (Q02817) Mucin-2 precursor (Intestinal mucin-2) [MASS=540296]                                                                                                    | 0.00                             | 0.37 | 2.76 | 0.00 | 1 | 1 | 2 | VPC[339]STVPVTTEVSYAGC[339]TK | 1 |
| MY18A_HUMAN (Q92614) Myosin-18A (Myosin XVIIIa) (Myosin containing PDZ domain) (Molecule associated with JAK3 N-terminus) (MAJN) [MASS=233113]                              | 0.00                             | 1.31 | 1.89 | 0.00 | 1 | 3 | 2 | RPTGDFGFSLRR                  | 1 |
|                                                                                                                                                                             |                                  |      |      |      |   |   | 2 | M[147]FNLM[147]K              | 1 |
|                                                                                                                                                                             |                                  |      |      |      |   |   | 2 | VM[147]HMFKGC[339]R           | 1 |
| MYCB2_HUMAN (O75592) Probable ubiquitin ligase protein MYCBP2 (EC 6.3.2.-) (Myc-binding protein 2) (Protein associated with Myc) (Pam/highwire/rpm-1 protein) [MASS=510165] | 0.21                             | 2.20 | 0.85 | 0.00 | 1 | 6 | 3 | GESHWWM[147]KGSTPTQISEIIK     | 1 |
|                                                                                                                                                                             |                                  |      |      |      |   |   | 3 | NAIAETIIALTKM[147]EEEEFR      | 1 |
|                                                                                                                                                                             |                                  |      |      |      |   |   | 3 | SPVRC[339]IATTR               | 1 |
|                                                                                                                                                                             |                                  |      |      |      |   |   | 2 | MGVASTEEETQAVM[147]KVYSK      | 1 |
|                                                                                                                                                                             |                                  |      |      |      |   |   | 2 | KIIKM[147]EGK                 | 1 |
| 3                                                                                                                                                                           | DLALPIGNELEEDLEILEEAAALQVC[330]K | 1    |      |      |   |   |   |                               |   |
| MYEF2_HUMAN (Q9P2K5) Myelin expression factor 2 (MyEF-2) (MST156) [MASS=64179]                                                                                              | 0.00                             | 5.33 | 0.99 | 0.00 | 1 | 2 | 3 | GC[330]GVVEFKDEEFVKK          | 1 |
|                                                                                                                                                                             |                                  |      |      |      |   |   | 2 | MDDKSVPHHEEYRSHDGK            | 1 |
| MYO6_HUMAN (Q9UM54) Myosin-6 (Myosin VI) [MASS=148713]                                                                                                                      | *                                | 0.62 | *    | *    | * | 1 | 2 | YM[147]PDKLAR                 | 1 |
| MYOM2_HUMAN (P54296) Myomesin-2 (M-protein) (165 kDa titin-associated protein) (165 kDa connectin-associated protein) [MASS=164793]                                         | *                                | 1.23 | *    | *    | * | 1 | 2 | EGETVTLKC[330]TMLVTPDLK       | 1 |
| MYP2_HUMAN (P02689) Myelin P2 protein [MASS=14778]                                                                                                                          | 0.78                             | 4.58 | 2.20 | 0.00 | 1 | 1 | 2 | M[147]VAEC[339]K              | 1 |
| MYPN_HUMAN (Q86TC9) Myopalladin (145 kDa sarcomeric protein) [MASS=145256]                                                                                                  | *                                | 1.29 | *    | *    | * | 1 | 3 | ISC[339]SGHLM[147]VQSLPIRSR   | 1 |

|                                                                                                                                                                                                                                                                              |      |       |      |      |    |   |   |                                     |   |
|------------------------------------------------------------------------------------------------------------------------------------------------------------------------------------------------------------------------------------------------------------------------------|------|-------|------|------|----|---|---|-------------------------------------|---|
|                                                                                                                                                                                                                                                                              |      |       |      |      |    |   | 2 | VC[330]GSNLLSIC[330]K               | 2 |
|                                                                                                                                                                                                                                                                              |      |       |      |      |    |   | 1 | TSASIGSLC[330]ADAR                  | 1 |
|                                                                                                                                                                                                                                                                              |      |       |      |      |    |   | 2 | VC[339]GSNLLSIC[339]K               | 2 |
|                                                                                                                                                                                                                                                                              |      |       |      |      |    |   | 1 | TSASIGSLC[339]ADAR                  | 1 |
|                                                                                                                                                                                                                                                                              |      |       |      |      |    |   | 1 | VC[339]GSNLLSIC[339]K               | 1 |
|                                                                                                                                                                                                                                                                              |      |       |      |      |    |   | 2 | VC[339]HC[339]LGK                   | 1 |
|                                                                                                                                                                                                                                                                              |      |       |      |      |    |   | 2 | TSASIGSLC[330]ADAR                  | 3 |
| MYPR_HUMAN (P60201) Myelin proteolipid protein (PLP) (Lipophilin) [MASS=29946]                                                                                                                                                                                               | 1.00 | 14.13 | 0.94 | 0.05 | 13 | 4 |   |                                     |   |
|                                                                                                                                                                                                                                                                              |      |       |      |      |    |   | 2 | LMGRGTKF                            | 1 |
|                                                                                                                                                                                                                                                                              |      |       |      |      |    |   | 1 | LMGRGTKF                            | 1 |
|                                                                                                                                                                                                                                                                              |      |       |      |      |    |   | 2 | TSASIGSLC[339]ADAR                  | 3 |
| MYST3_HUMAN (Q92794) Histone acetyltransferase MYST3 (EC 2.3.1.48) (EC 2.3.1.-) (MYST protein 3) (MOZ, YBF2/SAS3, SAS2 and TIP60 protein 3) (Runt-related transcription factor-binding protein 2) (Monocytic leukemia zinc finger protein) (Zinc finger protei [MASS=225054] | 0.00 | 2.05  | 0.86 | 0.00 | 1  | 2 | 3 | TLYYDVEPFLFYVLTQNDVKGC[330]HLVGYFSK | 1 |
|                                                                                                                                                                                                                                                                              |      |       |      |      |    |   | 3 | GM[147]WIC[330]QIC[330]RPR          | 1 |
| N4BM_HUMAN (O95298) NADH-ubiquinone oxidoreductase subunit B14.5b (EC 1.6.5.3) (EC 1.6.99.3) (Complex I-B14.5b) (CI-B14.5b) [MASS=14187]                                                                                                                                     | 0.98 | 38.66 | 1.33 | 0.00 | 1  | 4 | 2 | EM[147]FGYMK                        | 1 |
|                                                                                                                                                                                                                                                                              |      |       |      |      |    |   | 2 | LLYIGFLGYC[339]SGLIDNLIR            | 1 |
|                                                                                                                                                                                                                                                                              |      |       |      |      |    |   | 2 | FLPDEARSLPPP                        | 1 |
|                                                                                                                                                                                                                                                                              |      |       |      |      |    |   | 1 | RNPEPLR                             | 1 |
| NAC3_HUMAN (P57103) Sodium/calcium exchanger 3 precursor (Na(+)/Ca(2+)-exchange protein 3) [MASS=103009]                                                                                                                                                                     | *    | 0.86  | *    | *    | *  | 1 | 2 | REMIRILK                            | 1 |
| NALP1_HUMAN (Q9C000) NACHT, LRR and PYD-containing protein 1 (Death effector filament-forming ced-4-like apoptosis protein) (Nucleotide-binding domain and caspase recruitment domain) (Caspase recruitment domain protein 7) [MASS=165865]                                  | *    | 1.15  | *    | *    | *  | 2 | 3 | HSNC[330]IIDLEK                     | 1 |
|                                                                                                                                                                                                                                                                              |      |       |      |      |    |   | 1 | GLLPLSS                             | 1 |

|                                                                                                                                                                                                                                    |      |       |      |      |   |   |                                                                           |                                      |   |
|------------------------------------------------------------------------------------------------------------------------------------------------------------------------------------------------------------------------------------|------|-------|------|------|---|---|---------------------------------------------------------------------------|--------------------------------------|---|
| NALP4_HUMAN (Q96MN2) NACHT, LRR and PYD-containing protein 4 (PYRIN-containing APAF1-like protein 4) (PAAD and NACHT-containing protein 2) (PYRIN and NACHT-containing protein 2) (Ribonuclease inhibitor 2) [MASS=113445]         | 0.00 | 3.02  | 2.19 | 0.00 | 1 | 1 | 3                                                                         | LLFVIDSFEEELQGGLNEPDSLDC[339]GDLMEKR | 1 |
| NAP5_HUMAN (O14513) Nck-associated protein 5 (NAP-5) (Fragment) [MASS=44829]                                                                                                                                                       | *    | 2.16  | *    | *    | * | 1 | 1                                                                         | VSPKRGVPK                            | 1 |
| NARG1_HUMAN (Q9BXJ9) NMDA receptor-regulated protein 1 (N-terminal acetyltransferase) (Tubedown-1 protein) (Tbdn100) (Gastric cancer antigen Ga19) [MASS=101272]                                                                   | *    | 1.73  | *    | *    | * | 1 | 3                                                                         | AIELATTLDESLTNR                      | 1 |
| NCA11_HUMAN (P13591) Neural cell adhesion molecule 1, 140 kDa isoform precursor (N-CAM 140) (NCAM-140) (CD56 antigen) [MASS=93360]                                                                                                 | 1.00 | 5.78  | 1.01 | 0.00 | 2 | 3 | 2 FFLC[330]QVAGDAK<br>2 KVDKNDEAEYIC[330]IAENK<br>3 GEINFKDIQVIVNVPPTIQAR | 1<br>1<br>1                          |   |
| NCAM2_HUMAN (O15394) Neural cell adhesion molecule 2 precursor (N-CAM 2) [MASS=92932]                                                                                                                                              | *    | 4.06  | *    | *    | * | 2 | 3 GSNTELTVRNIINSDGGPYVC[330]RATNK<br>2 EVASEIWK                           | 1<br>1                               |   |
| NCOR1_HUMAN (O75376) Nuclear receptor corepressor 1 (N-CoR1) (N-CoR) [MASS=270208]                                                                                                                                                 | 0.28 | 0.82  | 0.20 | 0.00 | 1 | 1 | 3 QGM[147]SM[147]RESPVSAPLEGLIC[330]R                                     | 1                                    |   |
| NDRG2_HUMAN (Q9UN36) Protein NDRG2 (Protein Syld709613) [MASS=40798]                                                                                                                                                               | *    | 5.66  | *    | *    | * | 1 | 3 M[147]ADSGGQPQLTQPGKLTEAFK                                              | 1                                    |   |
| NDUA4_HUMAN (O00483) NADH dehydrogenase [ubiquinone] 1 alpha subcomplex subunit 4 (EC 1.6.5.3) (EC 1.6.99.3) (NADH-ubiquinone oxidoreductase MLRQ subunit) (Complex I-MLRQ) (CI-MLRQ) [MASS=9370]                                  | 0.91 | 14.81 | 1.26 | 0.05 | 2 | 1 | 2 LALFNPDVC[339]WDR                                                       | 2                                    |   |
| NDUA5_HUMAN (Q16718) NADH dehydrogenase [ubiquinone] 1 alpha subcomplex subunit 5 (EC 1.6.5.3) (EC 1.6.99.3) (NADH-ubiquinone oxidoreductase 13 kDa-B subunit) (Complex I-13Kd-B) (CI-13Kd-B) (Complex I subunit B13) [MASS=13327] | 0.90 | 13.91 | 0.70 | 0.00 | 1 | 1 | 2 TTGLVGLAVC[330]NTPHER                                                   | 1                                    |   |



|                                                                                                                                                                                                                                        |      |       |      |      |    |   |   |                              |                      |
|----------------------------------------------------------------------------------------------------------------------------------------------------------------------------------------------------------------------------------------|------|-------|------|------|----|---|---|------------------------------|----------------------|
| <p>NDUA7_HUMAN (O95182) NADH dehydrogenase [ubiquinone] 1 alpha subcomplex subunit 7 (EC 1.6.5.3) (EC 1.6.99.3) (NADH-ubiquinone oxidoreductase subunit B14.5a) (Complex I-B14.5a) (CI-B14.5a) [MASS=12420]</p>                        | 0.98 | 8.04  | 1.65 | 0.00 | 1  | 1 | 2 | LSNNYYC[330]TR               | 1                    |
|                                                                                                                                                                                                                                        |      |       |      |      |    |   |   | 2                            | AAAHHYGAQC[330]DKPNK |
| <p>NDUA8_HUMAN (P51970) NADH dehydrogenase [ubiquinone] 1 alpha subcomplex subunit 8 (EC 1.6.5.3) (EC 1.6.99.3) (NADH-ubiquinone oxidoreductase 19 kDa subunit) (Complex I-19KD) (CI-19KD) (Complex I-PGIV) (CI-PGIV) [MASS=19974]</p> | 1.00 | 17.54 | 1.15 | 0.05 | 10 | 3 | 2 | C[330]ALDFFR                 | 2                    |
|                                                                                                                                                                                                                                        |      |       |      |      |    |   | 1 | C[339]ALDFFR                 | 2                    |
|                                                                                                                                                                                                                                        |      |       |      |      |    |   | 2 | FDEC[330]VLDK                | 1                    |
|                                                                                                                                                                                                                                        |      |       |      |      |    |   | 2 | C[339]ALDFFR                 | 3                    |
|                                                                                                                                                                                                                                        |      |       |      |      |    |   | 1 | FDEC[330]VLDK                | 1                    |
| <p>NDUAA_HUMAN (O95299) NADH dehydrogenase [ubiquinone] 1 alpha subcomplex subunit 10, mitochondrial precursor (EC 1.6.5.3) (EC 1.6.99.3) (NADH-ubiquinone oxidoreductase 42 kDa subunit) (Complex I-42KD) (CI-42KD) [MASS=40750]</p>  | 1.00 | 8.17  | 1.58 | 0.02 | 2  | 2 | 2 | TFLPEM[147]SEKC[339]EVLQYSAR | 1                    |
|                                                                                                                                                                                                                                        |      |       |      |      |    |   | 2 | KQC[339]VDHYNEVK             | 1                    |
| <p>NDUAB_HUMAN (Q86Y39) NADH dehydrogenase [ubiquinone] 1 alpha subcomplex subunit 11 (EC 1.6.5.3) (EC 1.6.99.3) (NADH-ubiquinone oxidoreductase subunit B14.7) (Complex I-B14.7) (CI-B14.7) [MASS=14721]</p>                          | 0.97 | 16.43 | 1.54 | 0.00 | 1  | 1 | 3 | EKPDDPLNYFLGGC[339]AGGLTLGAR | 1                    |
| <p>NDUB7_HUMAN (P17568) NADH dehydrogenase [ubiquinone] 1 beta subcomplex subunit 7 (EC 1.6.5.3) (EC 1.6.99.3) (NADH-ubiquinone oxidoreductase B18 subunit) (Complex I-B18) (CI-B18) (Cell adhesion protein SQM1) [MASS=16271]</p>     | 1.00 | 13.97 | 1.26 | 0.14 | 3  | 2 | 2 | DYC[330]AHHLIR               | 1                    |
|                                                                                                                                                                                                                                        |      |       |      |      |    |   | 2 | DYC[339]AHHLIR               | 1                    |
|                                                                                                                                                                                                                                        |      |       |      |      |    |   | 2 | DSFPNFLAC[330]K              | 1                    |
| <p>NDUB9_HUMAN (Q9Y6M9) NADH dehydrogenase [ubiquinone] 1 beta subcomplex subunit 9 (EC 1.6.5.3) (EC 1.6.99.3) (NADH-ubiquinone oxidoreductase B22 subunit) (Complex I-B22) (CI-B22) [MASS=21700]</p>                                  | 0.99 | 7.87  | 1.08 | 0.00 | 1  | 1 | 2 | VPEWC[330]LDDWHPSEK          | 1                    |

|                                                                                                                                                                                                                                 |      |      |      |      |   |   |   |                                          |   |
|---------------------------------------------------------------------------------------------------------------------------------------------------------------------------------------------------------------------------------|------|------|------|------|---|---|---|------------------------------------------|---|
| NDUBA_HUMAN (O96000) NADH dehydrogenase [ubiquinone] 1 beta subcomplex subunit 10 (EC 1.6.5.3) (EC 1.6.99.3) (NADH-ubiquinone oxidoreductase PDSW subunit) (Complex I-PDSW) (CI-PDSW) [MASS=20645]                              | 0.95 | 6.43 | 1.29 | 0.00 | 1 | 1 | 2 | EGQNYQQNC[339]IK                         | 1 |
| NELFB_HUMAN (Q8WX92) Negative elongation factor B (NELF-B) (Cofactor of BRCA1) [MASS=65697]                                                                                                                                     | *    | 2.24 | *    | *    | * | 1 | 2 | HLQELVGQETLPR                            | 1 |
| NFKB2_HUMAN (Q00653) Nuclear factor NF-kappa-B p100 subunit (DNA-binding factor KBF2) (H2TF1) (Lymphocyte translocation chromosome 10) (Oncogene Lym-10) (Lyt10) [Contains: Nuclear factor NF-kappa-B p52 subunit] [MASS=96677] | 0.00 | 2.34 | 1.13 | 0.00 | 1 | 1 | 2 | LGPPPEPPGGLC[330]HGHPQPQVH               | 1 |
| NIPS2_HUMAN (O75323) Protein NipSnap2 (Glioblastoma amplified sequence) [MASS=33742]                                                                                                                                            | 0.29 | 5.59 | 1.27 | 0.00 | 1 | 1 | 3 | LQFHNVKPEC[339]LEAYNK                    | 1 |
| NIT1_HUMAN (Q86X76) Nitrilase homolog 1 (EC 3.5.-.-) [MASS=35896]                                                                                                                                                               | 0.79 | 5.20 | 0.98 | 0.00 | 1 | 1 | 2 | LGAC[339]LAFLPEAFDFIAR                   | 1 |
| NMDE1_HUMAN (Q12879) Glutamate [NMDA] receptor subunit epsilon 1 precursor (N-methyl D-aspartate receptor subtype 2A) (NR2A) (NMDAR2A) (hNR2A) [MASS=165281]                                                                    | 0.00 | 1.09 | 0.08 | 0.00 | 1 | 1 | 3 | SC[330]LSNM[147]PTYSGHFTMR               | 1 |
| NNTM_HUMAN (Q13423) NAD(P) transhydrogenase, mitochondrial precursor (EC 1.6.1.2) (Pyridine nucleotide transhydrogenase) (Nicotinamide nucleotide transhydrogenase) [MASS=113895]                                               | 1.00 | 3.87 | 1.08 | 0.09 | 3 | 3 | 2 | KTC[339]DALQAK                           | 1 |
|                                                                                                                                                                                                                                 |      |      |      |      |   |   | 2 | EANSIIITPGYGLC[339]AAK                   | 1 |
|                                                                                                                                                                                                                                 |      |      |      |      |   |   | 2 | QGFNVVVEGAGEASK                          | 1 |
|                                                                                                                                                                                                                                 |      |      |      |      |   |   | 2 | EANSIIITPGYGLC[330]AAK                   | 1 |
| NPC1_HUMAN (O15118) Niemann-Pick C1 protein precursor [MASS=142166]                                                                                                                                                             | *    | 3.68 | *    | *    | * | 2 | 3 | QSQFLNVTATEDYVDPVTNQTK                   | 1 |
|                                                                                                                                                                                                                                 |      |      |      |      |   |   | 3 | ALGLLC[330]GKDADAC[330]NATNWIEYM[147]FNK | 1 |
| NPFF2_HUMAN (Q9Y5X5) Neuropeptide FF receptor 2 (Neuropeptide G-protein coupled receptor) (G-protein coupled receptor 74) (G-protein coupled receptor HLWAR77) [MASS=60270]                                                     | 0.00 | 2.68 | 1.12 | 0.00 | 1 | 1 | 3 | GFQEAFLQLC[339]QKR                       | 1 |

|                                                                                                                                                                                                                                                                              |      |      |      |      |   |   |                  |                                                                                                 |                  |
|------------------------------------------------------------------------------------------------------------------------------------------------------------------------------------------------------------------------------------------------------------------------------|------|------|------|------|---|---|------------------|-------------------------------------------------------------------------------------------------|------------------|
| NR1H2_HUMAN (P55055) Oxysterols receptor LXR-beta (Liver X receptor beta) (Nuclear orphan receptor LXR-beta) (Ubiquitously-expressed nuclear receptor) (Nuclear receptor NER) [MASS=51102]                                                                                   | 0.00 | 2.60 | 9.38 | 0.00 | 1 | 1 | 3                | GGGTC[339]QM[147]DAFMR                                                                          | 1                |
| NRG2_HUMAN (O14511) Pro-neuregulin-2, membrane-bound isoform precursor (Pro-NRG2) [Contains: Neuregulin-2 (NRG-2) (Neural- and thymus-derived activator for ERBB kinases) (NTAK) (Divergent of neuregulin-1) (DON-1)] [MASS=91678]                                           | *    | 2.35 | *    | *    | * | 2 | 3<br>1           | VALVKVLDKWPLR<br>TSAGPRR                                                                        | 1<br>1           |
| NRP1_HUMAN (O14786) Neuropilin-1 precursor (Vascular endothelial cell growth factor 165 receptor) (CD304 antigen) [MASS=103120]                                                                                                                                              | 0.00 | 3.25 | 0.43 | 0.00 | 1 | 1 | 3                | LVSPVVYSQNSAHC[330]M[147]TFWYHMSGSHVGLR                                                         | 1                |
| NSD1_HUMAN (Q96L73) Histone-lysine N-methyltransferase, H3 lysine-36 and H4 lysine-20 specific (EC 2.1.1.43) (H3-K36-HMTase) (H4-K20-HMTase) (Nuclear receptor-binding SET domain-containing protein 1) (NR-binding SET domain-containing protein) (Androgen r [MASS=296650] | *    | 1.63 | *    | *    | * | 2 | 3<br>2           | EPGIPSLTPQAELPEPAVRSEK<br>LLENDLDPGFMPKKGDLGLSK                                                 | 1<br>1           |
| NSF_HUMAN (P46459) Vesicle-fusing ATPase (EC 3.6.4.6) (Vesicular-fusion protein NSF) (N-ethylmaleimide sensitive fusion protein) (NEM-sensitive fusion protein) [MASS=82654]                                                                                                 | 1.00 | 6.32 | 1.17 | 0.03 | 3 | 3 | 1<br>2<br>2<br>3 | GILLYGPPGC[339]GK<br>GILLYGPPGC[339]GK<br>QC[330]IGTM[147]TIEIDFLQK<br>LGANGLHIIIFDEIDAIC[339]K | 1<br>1<br>1<br>1 |
| NTRK1_HUMAN (P04629) High affinity nerve growth factor receptor precursor (EC 2.7.10.1) (Neurotrophic tyrosine kinase receptor type 1) (TRK1 transforming tyrosine kinase protein) (p140-TrkA) (Trk-A) [MASS=87497]                                                          | 0.00 | 1.38 | 4.25 | 0.00 | 1 | 1 | 2                | NC[339]LVGQGLVVK                                                                                | 1                |
| NU160_HUMAN (Q12769) Nuclear pore complex protein Nup160 (Nucleoporin Nup160) (160 kDa nucleoporin) [MASS=149000]                                                                                                                                                            | 0.00 | 3.04 | 0.39 | 1.54 | 2 | 2 | 3<br>2           | MNLTQLYGSNTAGYIVC[330]R<br>MNLTQLYGSNTAGYIVC[339]RGVHK                                          | 1<br>1           |
| NUAK1_HUMAN (O60285) NUA family, SNF1-like kinase 1 (EC 2.7.11.1) (AMPK-related protein kinase 5) [MASS=74305]                                                                                                                                                               | 0.00 | 4.08 | 1.14 | 0.00 | 1 | 1 | 3                | MEQDLC[339]RTGVLLPSSPEAEVPGKLSPK                                                                | 1                |

|                                                                                                                                                                                                   |                        |       |      |      |   |   |   |                                    |   |
|---------------------------------------------------------------------------------------------------------------------------------------------------------------------------------------------------|------------------------|-------|------|------|---|---|---|------------------------------------|---|
| NUAM_HUMAN (P28331) NADH-ubiquinone oxidoreductase 75 kDa subunit, mitochondrial precursor (EC 1.6.5.3) (EC 1.6.99.3) (Complex I-75Kd) (CI-75Kd) [MASS=79467]                                     | 1.00                   | 15.82 | 1.30 | 0.07 | 5 | 7 | 3 | DLLNRVDSDTLC[339]TEEVFPTAGAGTDLR   | 1 |
|                                                                                                                                                                                                   |                        |       |      |      |   |   | 2 | VLFLLGADGGC[339]ITR                | 1 |
|                                                                                                                                                                                                   |                        |       |      |      |   |   | 2 | C[339]IQC[330]TRC[339]IR           | 1 |
|                                                                                                                                                                                                   |                        |       |      |      |   |   | 2 | VLFLLGADGGC[330]ITR                | 1 |
|                                                                                                                                                                                                   |                        |       |      |      |   |   | 3 | DC[339]FIYQGHGHDVGAPIADVILPGAAYTEK | 1 |
|                                                                                                                                                                                                   |                        |       |      |      |   |   | 1 | FC[339]YHER                        | 1 |
|                                                                                                                                                                                                   |                        |       |      |      |   |   | 2 | C[339]IQC[330]TRC[330]IR           | 1 |
|                                                                                                                                                                                                   |                        |       |      |      |   |   | 2 | C[339]VKAVTEGAQAVEEPSIC[339]       | 1 |
|                                                                                                                                                                                                   |                        |       |      |      |   |   | 2 | VVAAC[339]AM[147]PVM[147]K         | 1 |
|                                                                                                                                                                                                   |                        |       |      |      |   |   | 2 | LLEGC[339]LVGGR                    | 2 |
| NUBM_HUMAN (P49821) NADH-ubiquinone oxidoreductase 51 kDa subunit, mitochondrial precursor (EC 1.6.5.3) (EC 1.6.99.3) (Complex I-51KD) (CI-51KD) (NADH dehydrogenase flavoprotein 1) [MASS=50817] | 1.00                   | 16.16 | 1.13 | 0.06 | 7 | 5 | 2 | HESC[339]GQC[339]TPC[339]R         | 1 |
|                                                                                                                                                                                                   |                        |       |      |      |   |   | 2 | NAC[339]GSGYDFDVFVVR               | 2 |
|                                                                                                                                                                                                   |                        |       |      |      |   |   | 2 | PSDGRPKYLVVNADEGEPGTC[330]K        | 1 |
|                                                                                                                                                                                                   |                        |       |      |      |   |   | 2 | LLEGC[330]LVGGR                    | 1 |
| 2                                                                                                                                                                                                 | YLVVNADEGEPGTC[339]KDR | 1     |      |      |   |   |   |                                    |   |
| NUCGL_HUMAN (Q9Y2C4) Endonuclease G-like 1 (EC 3.1.30.-) (Endo G-like) [MASS=41127]                                                                                                               | 0.98                   | 3.53  | 1.03 | 0.00 | 1 | 1 | 2 | C[339]YTNHALSYDQAK                 | 1 |
| NUCM_HUMAN (O75306) NADH-ubiquinone oxidoreductase 49 kDa subunit, mitochondrial precursor (EC 1.6.5.3) (EC 1.6.99.3) (Complex I-49KD) (CI-49KD) [MASS=52545]                                     | *                      | 3.89  | *    | *    | * | 1 | 2 | NITLNFGPQHAAHGVLRL                 | 1 |
| NUKM_HUMAN (O75251) NADH-ubiquinone oxidoreductase 20 kDa subunit, mitochondrial precursor (EC 1.6.5.3) (EC 1.6.99.3) (Complex I-20KD) (CI-20KD) (PSST subunit) [MASS=23563]                      | *                      | 4.69  | *    | *    | * | 1 | 2 | FGVFRASPR                          | 1 |
| NUMA1_HUMAN (Q14980) Nuclear mitotic apparatus protein 1 (NuMA protein) (SP-H antigen) [MASS=238273]                                                                                              | 0.00                   | 1.80  | *    | *    | * | 3 | 2 | LRLQAETASNSARAER                   | 1 |
|                                                                                                                                                                                                   |                        |       |      |      |   |   | 1 | QAASPLEPK                          | 1 |
|                                                                                                                                                                                                   |                        |       |      |      |   |   | 3 | HQVEQLSSSLK                        | 1 |
| NUMM_HUMAN (O75380) NADH-ubiquinone oxidoreductase 13 kDa-A subunit, mitochondrial precursor (EC 1.6.5.3) (EC 1.6.99.3) (Complex I-13KD-A) (CI-13KD-A) [MASS=13712]                               | 0.99                   | 12.10 | 1.05 | 0.00 | 1 | 1 | 1 | VIAC[330]DGGGGALGHPK               | 1 |
|                                                                                                                                                                                                   |                        |       |      |      |   |   | 2 | VIAC[339]DGGGGALGHPK               | 1 |
| NUP50_HUMAN (Q9UKX7) Nucleoporin 50 kDa (Nuclear pore-associated protein 60 kDa-like) [MASS=50144]                                                                                                | 0.00                   | 3.21  | 1.31 | 0.00 | 1 | 1 | 2 | HVNTNPLC[339]DLTPIFK               | 1 |

|                                                                                                                                                                                   |                            |       |      |      |   |    |                                                                                                                                                                                                                                                                                                   |                                              |       |
|-----------------------------------------------------------------------------------------------------------------------------------------------------------------------------------|----------------------------|-------|------|------|---|----|---------------------------------------------------------------------------------------------------------------------------------------------------------------------------------------------------------------------------------------------------------------------------------------------------|----------------------------------------------|-------|
| NUP53_HUMAN (Q8NFH5) Nucleoporin<br>NUP53 (Nuclear pore complex protein Nup53)<br>(Nucleoporin Nup35) (35 kDa nucleoporin)<br>(Mitotic phosphoprotein 44) (MP-44)<br>[MASS=34774] | 0.00                       | 8.59  | 0.32 | 0.00 | 1 | 2  | 2                                                                                                                                                                                                                                                                                                 | IFGESIM[147]IGVKPC[330]IDK                   | 1     |
|                                                                                                                                                                                   |                            |       |      |      |   |    | 2                                                                                                                                                                                                                                                                                                 | ISTM[147]RPLATAYK                            | 1     |
| O10H3_HUMAN (O60404) Olfactory receptor<br>10H3 [MASS=35721]                                                                                                                      | *                          | 3.80  | *    | *    | * | 1  | 2                                                                                                                                                                                                                                                                                                 | ELKNAINKNFC[339]R                            | 1     |
| O4A15_HUMAN (Q8NGL6) Olfactory receptor<br>4A15 (Olfactory receptor OR11-118)<br>[MASS=35306]                                                                                     | 0.00                       | 11.46 | 0.55 | 0.00 | 1 | 2  | 3                                                                                                                                                                                                                                                                                                 | NNVTEFILLGLTQNPEGQK                          | 1     |
|                                                                                                                                                                                   |                            |       |      |      |   |    | 3                                                                                                                                                                                                                                                                                                 | YM[147]AIC[330]KPLHELITMNR                   | 1     |
| O51B4_HUMAN (Q9Y5P0) Olfactory receptor<br>51B4 (Odorant receptor HOR5'beta1)<br>[MASS=34926]                                                                                     | 0.00                       | 2.90  | 4.17 | 0.00 | 1 | 1  | 2                                                                                                                                                                                                                                                                                                 | YNC[339]ILTNSR                               | 1     |
|                                                                                                                                                                                   |                            |       |      |      |   |    | 1                                                                                                                                                                                                                                                                                                 | TLSPGPK                                      | 1     |
| OBSCN_HUMAN (Q5VST9) Obscurin<br>(Obscurin-myosin light chain kinase) (Obscurin-<br>MLCK) (Obscurin-RhoGEF) [MASS=868479]                                                         | 0.00                       | 1.82  | 0.28 | 0.00 | 1 | 10 | 3                                                                                                                                                                                                                                                                                                 | LLEPVC[339]GELGGTVTLAC[330]ELSPAC[330]AEVVWR | 1     |
|                                                                                                                                                                                   |                            |       |      |      |   |    | 3                                                                                                                                                                                                                                                                                                 | AEGAPASPPSTGTR                               | 1     |
|                                                                                                                                                                                   |                            |       |      |      |   |    | 3                                                                                                                                                                                                                                                                                                 | LQVAELEPQISER                                | 1     |
|                                                                                                                                                                                   |                            |       |      |      |   |    | 1                                                                                                                                                                                                                                                                                                 | LSSSSK                                       | 1     |
|                                                                                                                                                                                   |                            |       |      |      |   |    | 2                                                                                                                                                                                                                                                                                                 | EGATAVLQC[330]ELNSAAPVEWR                    | 1     |
|                                                                                                                                                                                   |                            |       |      |      |   |    | 2                                                                                                                                                                                                                                                                                                 | TSAMLTVRAM[147]PSK                           | 1     |
|                                                                                                                                                                                   |                            |       |      |      |   |    | 2                                                                                                                                                                                                                                                                                                 | LEVRVKPVVFLK                                 | 1     |
|                                                                                                                                                                                   |                            |       |      |      |   |    | 2                                                                                                                                                                                                                                                                                                 | GTAVFTC[339]KTEHPAATVTWRK                    | 1     |
|                                                                                                                                                                                   |                            |       |      |      |   |    | 2                                                                                                                                                                                                                                                                                                 | VVFAKEQPVHR                                  | 1     |
|                                                                                                                                                                                   |                            |       |      |      |   |    | ODB2_HUMAN (P11182) Lipoamide<br>acyltransferase component of branched-chain<br>alpha-keto acid dehydrogenase complex,<br>mitochondrial precursor (EC 2.3.1.168)<br>(Dihydrolipoyllysine-residue (2-<br>methylpropanoyl)transferase) (E2)<br>(Dihydrolipoamide branched chain tra<br>[MASS=53487] | 0.99                                         | 14.73 |
| 3                                                                                                                                                                                 | PVIMPPEVAIGALGSIKAI PRFNQK | 1     |      |      |   |    |                                                                                                                                                                                                                                                                                                   |                                              |       |
| 2                                                                                                                                                                                 | IPHFGYC[339]DEIDLTELVK     | 1     |      |      |   |    |                                                                                                                                                                                                                                                                                                   |                                              |       |
| 2                                                                                                                                                                                 | IPHFGYC[339]DEIDLTELVKLR   | 1     |      |      |   |    |                                                                                                                                                                                                                                                                                                   |                                              |       |
| ODO1_HUMAN (Q02218) 2-oxoglutarate<br>dehydrogenase E1 component, mitochondrial<br>precursor (EC 1.2.4.2) (Alpha-ketoglutarate<br>dehydrogenase) [MASS=113475]                    | 0.99                       | 1.30  | 0.82 | 0.00 | 1 | 1  | 2                                                                                                                                                                                                                                                                                                 | KELEQIFC[339]QFDSK                           | 1     |

|                                                                                                                                                                                                                                                                             |      |      |      |      |   |   |   |                                        |   |
|-----------------------------------------------------------------------------------------------------------------------------------------------------------------------------------------------------------------------------------------------------------------------------|------|------|------|------|---|---|---|----------------------------------------|---|
| ODP2_HUMAN (P10515) Dihydrolipoalysine-residue acetyltransferase component of pyruvate dehydrogenase complex, mitochondrial precursor (EC 2.3.1.12) (Pyruvate dehydrogenase complex E2 subunit) (PDCE2) (E2) (Dihydrolipoamide S-acetyltransferase component [MASS=65781])  | 1.00 | 9.77 | 1.03 | 0.06 | 4 | 3 | 2 | DVPIGAIIC[330]ITVGKPEDIEAFK            | 1 |
|                                                                                                                                                                                                                                                                             |      |      |      |      |   |   | 3 | NFSAIINPPQAC[339]ILAIGASEDKLVPADNEK    | 1 |
|                                                                                                                                                                                                                                                                             |      |      |      |      |   |   | 1 | ASALAC[339]LK                          | 1 |
|                                                                                                                                                                                                                                                                             |      |      |      |      |   |   | 2 | DVPIGAIIC[339]ITVGKPEDIEAFK            | 1 |
|                                                                                                                                                                                                                                                                             |      |      |      |      |   |   | 2 | ASALAC[330]LK                          | 1 |
| ODPB_HUMAN (P11177) Pyruvate dehydrogenase E1 component subunit beta, mitochondrial precursor (EC 1.2.4.1) (PDHE1-B) [MASS=39219]                                                                                                                                           | 0.99 | 7.80 | 0.96 | 0.00 | 1 | 1 | 3 | GPNGASAGVAAQHSQC[330]FAAWYGHC[330]PGLK | 1 |
| ODPX_HUMAN (O00330) Pyruvate dehydrogenase protein X component, mitochondrial precursor (Dihydrolipoamide dehydrogenase-binding protein of pyruvate dehydrogenase complex) (Lipoyl-containing pyruvate dehydrogenase complex component X) (E3-binding protein) [MASS=54122] | 0.98 | 3.79 | 1.28 | 0.00 | 1 | 1 | 2 | STVPHAYATADC[339]DLGAVLK               | 1 |
| OPA1_HUMAN (O60313) Dynamin-like 120 kDa protein, mitochondrial precursor (Optic atrophy 1 gene protein) [MASS=111657]                                                                                                                                                      | *    | 7.29 | *    | *    | * | 3 | 3 | TQEQC[330]VHNETKNELEK                  | 1 |
|                                                                                                                                                                                                                                                                             |      |      |      |      |   |   | 3 | C[339]NEEHPAYLASDEITTVRKNLESR          | 1 |
|                                                                                                                                                                                                                                                                             |      |      |      |      |   |   | 3 | M[147]VLVDLPGVINTVTSGMAPDTKETIFSISK    | 1 |
| OPTN_HUMAN (Q96CV9) Optineurin (Optic neuropathy-inducing protein) (E3-14.7K-interacting protein) (FIP-2) (Huntingtin-interacting protein HYPL) (NEMO-related protein) (Transcription factor IIIA-interacting protein) (TFIIIA-IntP) [MASS=65922]                           | 0.00 | 6.41 | *    | *    | * | 2 | 3 | KLELQVESMLSEIKMEQAK                    | 1 |
|                                                                                                                                                                                                                                                                             |      |      |      |      |   |   | 2 | LQAEKADLLGIVSELQLK                     | 1 |
| ORC1_HUMAN (Q13415) Origin recognition complex subunit 1 (Replication control protein 1) [MASS=97349]                                                                                                                                                                       | *    | 2.44 | *    | *    | * | 1 | 3 | FRPLSSELFaelnkpQESAak                  | 1 |
| OX1R_HUMAN (O43613) Orexin receptor type 1 (Ox1r) (Hypocretin receptor type 1) [MASS=47522]                                                                                                                                                                                 | *    | 4.24 | *    | *    | * | 1 | 2 | M[147]EPSATPGAQMgvppGSR                | 1 |
| OZF_HUMAN (Q15072) Zinc finger protein OZF (Only zinc finger protein) (Zinc finger protein 146) [MASS=33280]                                                                                                                                                                | 0.00 | 5.14 | 4.42 | 0.00 | 1 | 1 | 2 | IYSGENPFAC[339]KVC[339]GK              | 1 |

|                                                                                                                                                                                     |      |       |      |      |   |   |   |                                         |   |
|-------------------------------------------------------------------------------------------------------------------------------------------------------------------------------------|------|-------|------|------|---|---|---|-----------------------------------------|---|
| P2Y13_HUMAN (Q9BPV8) P2Y purinoceptor 13 (P2Y13) (G-protein coupled receptor 86) (G-protein coupled receptor 94) [MASS=38440]                                                       | 0.00 | 7.21  | 0.41 | 0.00 | 1 | 1 | 3 | ETTLFLAATNIC[330]M[147]DPLIYIFLC[330]KK | 1 |
| P3H2_HUMAN (Q8IVL5) Prolyl 3-hydroxylase 2 precursor (EC 1.14.11.7) (Leprecan-like protein 1) (Myxoid liposarcoma-associated protein 4) [MASS=80984]                                | *    | 3.53  | *    | *    | * | 1 | 3 | LESELIKSAEGLGFSYTEPNYWIR                | 1 |
| PANK4_HUMAN (Q9NVE7) Pantothenate kinase 4 (EC 2.7.1.33) (Pantothenic acid kinase 4) (hPanK4) [MASS=85990]                                                                          | 0.00 | 2.46  | 1.60 | 0.00 | 1 | 1 | 3 | SLLHMISNDIGQLAC[339]LHAR                | 1 |
|                                                                                                                                                                                     |      |       |      |      |   |   | 2 | VTVAGLAGKDPVQC[339]SR                   | 2 |
| PARK7_HUMAN (Q99497) Protein DJ-1 (Oncogene DJ1) [MASS=19891]                                                                                                                       | 1.00 | 27.51 | 0.99 | 0.06 | 4 | 3 | 2 | VTVAGLAGKDPVQC[330]SR                   | 1 |
|                                                                                                                                                                                     |      |       |      |      |   |   | 2 | GLIAAIC[330]AGPTALLAHEIGFGSK            | 1 |
|                                                                                                                                                                                     |      |       |      |      |   |   | 3 | MM[147]NGGHYTYSENK                      | 1 |
| PCD15_HUMAN (Q96QU1) Protocadherin-15 precursor [MASS=216027]                                                                                                                       | 0.00 | 0.61  | 1.53 | 0.00 | 1 | 1 | 2 | C[339]TTNLM[147]PAEKIK                  | 1 |
| PCDAC_HUMAN (Q9UN75) Protocadherin alpha 12 precursor (PCDH-alpha12) [MASS=101651]                                                                                                  | *    | 2.55  | *    | *    | * | 1 | 2 | HGDLLEVNLLQNGILFVNSRIDREK               | 1 |
| PCOC2_HUMAN (Q9UKZ9) Procollagen C-endopeptidase enhancer 2 precursor (Procollagen COOH-terminal proteinase enhancer 2) (Procollagen C-proteinase enhancer 2) (PCPE-2) [MASS=45716] | 0.00 | 9.64  | 1.11 | 0.00 | 1 | 2 | 3 | FIDLESDNLC[330]RYDFVDVYNGHANGQR         | 1 |
|                                                                                                                                                                                     |      |       |      |      |   |   | 2 | YC[339]GDSPPAPIVSR                      | 1 |
| PDCD8_HUMAN (O95831) Programmed cell death protein 8, mitochondrial precursor (EC 1.-.-) (Apoptosis-inducing factor) [MASS=66900]                                                   | *    | 4.08  | *    | *    | * | 2 | 1 | TTLFR                                   | 1 |
|                                                                                                                                                                                     |      |       |      |      |   |   | 2 | EGVKVM[147]PNAIVQSVGVSSGK               | 1 |
| PDE8A_HUMAN (O60658) High-affinity cAMP-specific and IBMX-insensitive 3',5'-cyclic phosphodiesterase 8A (EC 3.1.4.17) [MASS=93303]                                                  | 0.00 | 7.48  | 4.80 | 0.00 | 1 | 3 | 3 | EAQAVLAC[339]FLDKHHDIIIDHRNPR           | 1 |
|                                                                                                                                                                                     |      |       |      |      |   |   | 3 | RHSSMARIHSMTEAPITK                      | 1 |
|                                                                                                                                                                                     |      |       |      |      |   |   | 2 | TAALPRTRGAGLLESELK                      | 1 |
| PDK2_HUMAN (Q15119) [Pyruvate dehydrogenase [lipoamide]] kinase isozyme 2, mitochondrial precursor (EC 2.7.11.2) (Pyruvate dehydrogenase kinase isoform 2) [MASS=46154]             | 0.99 | 5.65  | 0.63 | 0.00 | 1 | 2 | 2 | HIGSIDPNC[339]NVSEVVK                   | 1 |
|                                                                                                                                                                                     |      |       |      |      |   |   | 2 | TSFTFLR                                 | 1 |

|                                                                                                                                                                                                                                                            |      |      |      |      |   |   |   |                                      |   |
|------------------------------------------------------------------------------------------------------------------------------------------------------------------------------------------------------------------------------------------------------------|------|------|------|------|---|---|---|--------------------------------------|---|
| PDK3_HUMAN (Q15120) [Pyruvate dehydrogenase [lipoamide]] kinase isozyme 3, mitochondrial precursor (EC 2.7.11.2) (Pyruvate dehydrogenase kinase isoform 3) [MASS=46939]                                                                                    | 0.99 | 8.87 | 1.18 | 0.00 | 1 | 2 | 2 | HIGSIDPTC[339]NVADVVK                | 1 |
|                                                                                                                                                                                                                                                            |      |      |      |      |   |   | 3 | QFLDFGRDNAC[330]EKTSYMFLR            | 1 |
| PDYN_HUMAN (P01213) Beta-neoendorphin-dynorphin precursor (Proenkephalin B) (Prodynorphin) [Contains: Beta-neoendorphin; Dynorphin; Leu-enkephalin; Rimorphin; Leumorphin] [MASS=28385]                                                                    | 0.00 | 7.09 | 1.79 | 0.00 | 1 | 1 | 3 | C[339]QSFLSFFTPSTLGLNDK              | 1 |
|                                                                                                                                                                                                                                                            |      |      |      |      |   |   | 2 | DSQVPVTSSVVPEAK                      | 1 |
|                                                                                                                                                                                                                                                            |      |      |      |      |   |   | 2 | IWKMELLK                             | 1 |
|                                                                                                                                                                                                                                                            |      |      |      |      |   |   | 3 | PPLATSGPLKPSVSDTSIR                  | 1 |
|                                                                                                                                                                                                                                                            |      |      |      |      |   |   | 1 | VSISSSK                              | 1 |
|                                                                                                                                                                                                                                                            |      |      |      |      |   |   | 3 | C[330]PPGPVRLVIGRHPNPK               | 1 |
| PDZK3_HUMAN (O15018) PDZ domain-containing protein 3 (PDZ domain-containing protein 2) (Activated in prostate cancer protein) [MASS=301609]                                                                                                                | *    | 3.06 | *    | *    | * | 8 | 2 | AC[330]PGGSGPK                       | 1 |
|                                                                                                                                                                                                                                                            |      |      |      |      |   |   | 1 | SFSMAK                               | 2 |
|                                                                                                                                                                                                                                                            |      |      |      |      |   |   | 1 | EPGKPR                               | 5 |
| PEBP1_HUMAN (P30086) Phosphatidylethanolamine-binding protein 1 (PEBP-1) (Prostatic-binding protein) (HCNPpp) (Neuropolypeptide h3) (Raf kinase inhibitor protein) (RKIP) [Contains: Hippocampal cholinergic neurostimulating peptide (HCNP)] [MASS=20925] | 0.86 | 4.84 | 0.94 | 0.00 | 1 | 1 | 2 | C[339]DEPILSNR                       | 1 |
| PERQ1_HUMAN (O75420) PERQ amino acid rich with GYF domain protein 1 [MASS=89740]                                                                                                                                                                           | 0.00 | 1.59 | 0.59 | 0.00 | 1 | 1 | 3 | SC[330]FGASTWGLSMK                   | 1 |
| PGK1_HUMAN (P00558) Phosphoglycerate kinase 1 (EC 2.7.2.3) (Primer recognition protein 2) (PRP 2) [MASS=44483]                                                                                                                                             | 0.88 | 4.09 | 0.86 | 0.00 | 1 | 1 | 2 | AC[330]ANPAAGSVILLENLR               | 1 |
| PHAR1_HUMAN (Q9C0D0) Phosphatase and actin regulator 1 [MASS=66308]                                                                                                                                                                                        | *    | 5.34 | *    | *    | * | 1 | 3 | FFYSQGAQARRATLLLPPTLM[147]AASSEDDIDR | 1 |



|                                                                                                                                                                                                                                |      |      |      |      |   |   |             |                                                                          |             |
|--------------------------------------------------------------------------------------------------------------------------------------------------------------------------------------------------------------------------------|------|------|------|------|---|---|-------------|--------------------------------------------------------------------------|-------------|
| PHLD1_HUMAN (P80108) Phosphatidylinositol-glycan-specific phospholipase D 1 precursor (EC 3.1.4.50) (PI-G PLD) (Glycoprotein phospholipase D) (Glycosyl-phosphatidylinositol-specific phospholipase D) [MASS=92374]            | *    | 0.95 | *    | *    | * | 1 | 1           | LGHLLHIR                                                                 | 1           |
| PI51C_HUMAN (O60331) Phosphatidylinositol-4-phosphate 5-kinase type-1 gamma (EC 2.7.1.68) (Phosphatidylinositol-4-phosphate 5-kinase type I gamma) (PtdIns(4)P-5-kinase gamma) (PtdInsPKIgamma) (PIP5KIgamma) [MASS=73259]     | *    | 4.64 | *    | *    | * | 2 | 2<br>3      | GERLLLLHIGIIDILQSYR<br>NIRVVVMNNILPR                                     | 1<br>1      |
| PITM2_HUMAN (Q9BZ72) Membrane-associated phosphatidylinositol transfer protein 2 (Phosphatidylinositol transfer protein, membrane-associated 2) (Pyk2 N-terminal domain-interacting receptor 3) (NIR-3) [MASS=148932]          | 0.00 | 3.26 | 1.27 | 0.00 | 1 | 2 | 2<br>3      | VYHVGMIHPSWFRSILPKAALR<br>FDFEITDLFLFGC[339]PLGLVLALR                    | 1<br>1      |
| PK1L1_HUMAN (Q8TDX9) Polycystic kidney disease 1-like 1 protein (Polycystin-1L1) [MASS=315433]                                                                                                                                 | *    | 1.76 | *    | *    | * | 3 | 2<br>2<br>2 | SERFSPQPGTSPEKVNC[339]SYHR<br>NLSTLQLM[147]GSYTEIR<br>GPSPGWFIHVM[147]VK | 1<br>1<br>1 |
| PK3CG_HUMAN (P48736) Phosphatidylinositol-4,5-bisphosphate 3-kinase catalytic subunit gamma isoform (EC 2.7.1.153) (PI3-kinase p110 subunit gamma) (PtdIns-3-kinase subunit p110) (PI3K) (PI3Kgamma) (p120-PI3K) [MASS=126453] | 0.79 | 3.72 | 0.42 | 0.13 | 2 | 2 | 2<br>3      | KIANN[C330]IFIVIHR<br>AEM[147]PNQLRKQLEAIIATDPLNPLTAEDK                  | 2<br>1      |
| PLCG2_HUMAN (P16885) 1-phosphatidylinositol-4,5-bisphosphate phosphodiesterase gamma 2 (EC 3.1.4.11) (Phosphoinositide phospholipase C) (PLC-gamma-2) (Phospholipase C-gamma-2) (PLC-IV) [MASS=147936]                         | 0.00 | 3.32 | *    | *    | * | 3 | 2<br>1<br>3 | HFVLGTSAYFESLVELVSYYEK<br>RNSISLR<br>PDASAVYLRDFQR                       | 1<br>1<br>6 |
| PLRG1_HUMAN (O43660) Pleiotropic regulator 1 [MASS=57193]                                                                                                                                                                      | *    | 2.92 | *    | *    | * | 1 | 2           | SLKRTHDM[147]FVADNGK                                                     | 1           |

|                                                                                                                                                                                                                               |      |       |      |      |   |   |   |                                           |   |
|-------------------------------------------------------------------------------------------------------------------------------------------------------------------------------------------------------------------------------|------|-------|------|------|---|---|---|-------------------------------------------|---|
| PLXA2_HUMAN (O75051) Plexin-A2 precursor (Semaphorin receptor OCT) [MASS=212654]                                                                                                                                              | *    | 2.30  | *    | *    | * | 2 | 3 | IEPEWSIASGHTPLTITGFNLDVIQEPR              | 1 |
|                                                                                                                                                                                                                               |      |       |      |      |   |   | 2 | YLSSEDKLIRQQIEYK                          | 1 |
| PLXA3_HUMAN (P51805) Plexin-A3 precursor (Plexin-4) (Semaphorin receptor SEX) [MASS=207664]                                                                                                                                   | 0.00 | 1.66  | 0.99 | 0.00 | 1 | 2 | 3 | TLTLHC[339]VC[339]PENEGSAQVPVK            | 1 |
|                                                                                                                                                                                                                               |      |       |      |      |   |   | 3 | LQLLSKETGVR                               | 1 |
| PLXB2_HUMAN (O15031) Plexin-B2 precursor (MM1) [MASS=205098]                                                                                                                                                                  | *    | 1.25  | *    | *    | * | 2 | 2 | RDTTHNLPEFIVKFGSR                         | 1 |
|                                                                                                                                                                                                                               |      |       |      |      |   |   | 1 | ISVAGR                                    | 1 |
| PLXD1_HUMAN (Q9Y4D7) Plexin-D1 precursor [MASS=212094]                                                                                                                                                                        | 0.00 | 4.05  | 0.75 | 0.00 | 1 | 4 | 3 | NLNVSFQGC[339]GM[147]DSL SVRAMDTDTLTQVKEK | 1 |
|                                                                                                                                                                                                                               |      |       |      |      |   |   | 2 | GNISAVAVR                                 | 1 |
|                                                                                                                                                                                                                               |      |       |      |      |   |   | 3 | C[339]SLASLLTIALHGKLEYYSIM[147]K          | 1 |
|                                                                                                                                                                                                                               |      |       |      |      |   |   | 2 | GPLQPM[147]AGTC[330]PAPEIR                | 1 |
| PO3F2_HUMAN (P20265) POU domain, class 3, transcription factor 2 (Nervous system-specific octamer-binding transcription factor N-Oct-3) (Brain-specific homeobox/POU domain protein 2) (Brain-2) (Protein Brn-2) [MASS=46892] | 0.00 | 6.77  | 1.30 | 0.00 | 1 | 2 | 2 | PSVVVQQGGR                                | 1 |
|                                                                                                                                                                                                                               |      |       |      |      |   |   | 3 | C[339]PKPSAQEITSLADSLQLEK                 | 1 |
| PO5F1_HUMAN (Q01860) POU domain, class 5, transcription factor 1 (Octamer-binding transcription factor 3) (Oct-3) (Oct-4) [MASS=38570]                                                                                        | 0.00 | 7.22  | *    | *    | * | 2 | 1 | TSIENRVR                                  | 1 |
|                                                                                                                                                                                                                               |      |       |      |      |   |   | 2 | VFSQTTIC[339]RFEALQLSFK                   | 1 |
| PP1A_HUMAN (P62136) Serine/threonine-protein phosphatase PP1-alpha catalytic subunit (EC 3.1.3.16) (PP-1A) [MASS=37512]                                                                                                       | 1.00 | 3.03  | 1.11 | 0.00 | 2 | 1 | 2 | GNHEC[330]ASINR                           | 1 |
|                                                                                                                                                                                                                               |      |       |      |      |   |   | 2 | GNHEC[339]ASINR                           | 1 |
| PPIA_HUMAN (P62937) Peptidyl-prolyl cis-trans isomerase A (EC 5.2.1.8) (PPIase A) (Rotamase A) (Cyclophilin A) (Cyclosporin A-binding protein) [MASS=17881]                                                                   | 0.75 | 8.54  | 0.85 | 0.00 | 1 | 1 | 2 | IIPGFM[147]C[330]QGGDFTR                  | 1 |
| PPT1_HUMAN (P50897) Palmitoyl-protein thioesterase 1 precursor (EC 3.1.2.22) (Palmitoyl-protein hydrolase 1) [MASS=34193]                                                                                                     | 0.38 | 7.84  | 0.50 | 0.00 | 1 | 1 | 3 | C[330]PSPPM[147]INLISVGGQHGVFGLPR         | 1 |
| PRD11_HUMAN (Q9NQV5) PR domain-containing protein 11 [MASS=57033]                                                                                                                                                             | 0.00 | 10.71 | 0.19 | 0.00 | 1 | 2 | 3 | M[147]LKM[147]AEPIASLMIVEC[339]RAC[330]LR | 1 |
|                                                                                                                                                                                                                               |      |       |      |      |   |   | 3 | DTSGESDVRC[330]VNEVIPKGHIFGPYEGQISTQDK    | 1 |
|                                                                                                                                                                                                                               |      |       |      |      |   |   | 3 | MLKMAEPIASLMIVEC[330]RAC[330]LR           | 1 |
| PRD15_HUMAN (P57071) PR domain zinc finger protein 15 (PR domain-containing protein 15) (Zinc finger protein 298) [MASS=169203]                                                                                               | *    | 2.52  | *    | *    | * | 2 | 3 | LC[330]HLVAQGRSSLPPNLEIRR                 | 1 |
|                                                                                                                                                                                                                               |      |       |      |      |   |   | 3 | HIMEVHKEKGXGC[330]SIC[339]NR              | 1 |

|                                                                                                                                                                                                                                                                              |      |       |      |      |   |   |   |                                        |   |
|------------------------------------------------------------------------------------------------------------------------------------------------------------------------------------------------------------------------------------------------------------------------------|------|-------|------|------|---|---|---|----------------------------------------|---|
| PRD16_HUMAN (Q9HAZ2) PR domain zinc finger protein 16 (PR domain-containing protein 16) (Transcription factor MEL1) [MASS=140261]                                                                                                                                            | *    | 5.41  | *    | *    | * | 3 | 3 | MFPNKYSLEQHM[147]VIHTEEREYK            | 1 |
|                                                                                                                                                                                                                                                                              |      |       |      |      |   |   | 3 | DC[339]ERMFPNKYSLEQHM[147]VIHTEER      | 1 |
|                                                                                                                                                                                                                                                                              |      |       |      |      |   |   | 3 | PEGLGGSGQAHEC[330]KDC[330]ERM[147]FPNK | 1 |
| PRDX3_HUMAN (P30048) Thioredoxin-dependent peroxide reductase, mitochondrial precursor (EC 1.11.1.15) (Peroxiredoxin-3) (PRX III) (Antioxidant protein 1) (AOP-1) (Protein MER5 homolog) (HBC189) [MASS=27692]                                                               | 1.00 | 41.80 | 0.56 | 0.05 | 2 | 4 | 3 | NGGLGHM[147]NIALLSDLTKQISR             | 1 |
|                                                                                                                                                                                                                                                                              |      |       |      |      |   |   | 2 | YLVLFYPLDFTFVC[339]PTEIVAFSDK          | 1 |
|                                                                                                                                                                                                                                                                              |      |       |      |      |   |   | 3 | AFQYVETHGEVC[339]PANWTPDSPTIKPSAASK    | 1 |
|                                                                                                                                                                                                                                                                              |      |       |      |      |   |   | 3 | ANEFHDVNC[339]EVVAVSVDHSHLAWINTPR      | 1 |
| PRDX5_HUMAN (P30044) Peroxiredoxin-5, mitochondrial precursor (EC 1.11.1.15) (Prx-V) (Peroxisomal antioxidant enzyme) (PLP) (Thioredoxin reductase) (Thioredoxin peroxidase PMP20) (Antioxidant enzyme B166) (AOEB166) (TPx type VI) (Liver tissue 2D-page spo [MASS=22026]) | 1.00 | 7.48  | 1.09 | 0.01 | 3 | 1 | 2 | GVLFGVPGAFTPGC[339]SK                  | 2 |
|                                                                                                                                                                                                                                                                              |      |       |      |      |   |   | 2 | GVLFGVPGAFTPGC[330]SK                  | 1 |
| PREX1_HUMAN (Q8TCU6) Phosphatidylinositol 3,4,5-trisphosphate-dependent Rac exchanger 1 protein (P-Rex1 protein) [MASS=186203]                                                                                                                                               | *    | 2.29  | *    | *    | * | 2 | 3 | EEAVALGVGLC[330]NNGFMHHVLEKSEFR        | 1 |
|                                                                                                                                                                                                                                                                              |      |       |      |      |   |   | 3 | GPVM[147]SRAFEETK                      | 1 |
| PROD_HUMAN (O43272) Proline oxidase, mitochondrial precursor (EC 1.5.3.-) (Proline dehydrogenase) [MASS=59216]                                                                                                                                                               | 0.99 | 6.01  | 0.92 | 0.00 | 1 | 2 | 2 | M[147]DVLAKKATEMGVR                    | 1 |
|                                                                                                                                                                                                                                                                              |      |       |      |      |   |   | 2 | FNVEKPLIFNTYQC[339]YLK                 | 1 |
| PSL1_HUMAN (Q8TCT7) Signal peptide peptidase-like 2B (EC 3.4.23.-) (Protein SPP-like 2B) (Protein SPPL2b) (Intramembrane protease 4) (IMP4) (Presenilin-like protein 1) [MASS=64643]                                                                                         | *    | 3.89  | *    | *    | * | 1 | 3 | TSEEMGAGAPMREPGSPAESEGR                | 1 |
| PUR4_HUMAN (O15067) Phosphoribosylformylglycinamide synthase (EC 6.3.5.3) (FGAM synthase) (FGAMS) (Formylglycinamide ribotide amidotransferase) (FGARAT) (Formylglycinamide ribotide synthetase) [MASS=144663]                                                               | 0.00 | 3.14  | 0.28 | 0.70 | 3 | 2 | 3 | RIVLVDDREC[330]PVR                     | 3 |
|                                                                                                                                                                                                                                                                              |      |       |      |      |   |   | 3 | GVAFVGGFSYADVLSAKGWAAAVTFHPR           | 1 |
| PX11C_HUMAN (Q96HA9) Peroxisomal membrane protein 11C (Peroxin-11C) (Peroxisomal biogenesis factor 11C) (PEX11gamma) (Pex11pgamma) [MASS=26636]                                                                                                                              | 0.00 | 4.98  | 4.13 | 0.00 | 1 | 1 | 3 | LLVVSTQLSHC[339]JR                     | 1 |

|                                                                                                                                                                                                             |      |       |      |      |   |   |   |                                                 |   |
|-------------------------------------------------------------------------------------------------------------------------------------------------------------------------------------------------------------|------|-------|------|------|---|---|---|-------------------------------------------------|---|
| PYC_HUMAN (P11498) Pyruvate carboxylase, mitochondrial precursor (EC 6.4.1.1) (Pyruvic carboxylase) (PCB) [MASS=129633]                                                                                     | 0.98 | 0.76  | 1.42 | 0.00 | 1 | 1 | 1 | AGTHILC[339]IK                                  | 1 |
| QOR_HUMAN (Q08257) Quinone oxidoreductase (EC 1.6.5.5) (NADPH:quinone reductase) (Zeta-crystallin) [MASS=35206]                                                                                             | 1.00 | 6.99  | 0.90 | 0.08 | 2 | 2 | 2 | ALIHSAC[330]VK                                  | 1 |
|                                                                                                                                                                                                             |      |       |      |      |   |   | 2 | VHAC[339]GVNPNVETYIR                            | 1 |
| RAC1_HUMAN (P63000) Ras-related C3 botulinum toxin substrate 1 precursor (p21-Rac1) (Ras-like protein TC25) [MASS=21450]                                                                                    | 1.00 | 11.98 | 0.47 | 0.84 | 3 | 2 | 2 | HHC[330]PNTPIILVGTK                             | 1 |
|                                                                                                                                                                                                             |      |       |      |      |   |   | 1 | AVLC[330]PPPVK                                  | 1 |
|                                                                                                                                                                                                             |      |       |      |      |   |   | 3 | HHC[330]PNTPIILVGTK                             | 1 |
| RAMP1_HUMAN (O60894) Receptor activity-modifying protein 1 precursor (CRLR activity-modifying protein 1) (Calcitonin-receptor-like receptor activity-modifying protein 1) [MASS=16988]                      | 0.00 | 8.11  | 0.73 | 0.00 | 1 | 1 | 2 | LGC[330]FWPNAEVDR                               | 1 |
| RBCC1_HUMAN (Q8TDY2) RB1-inducible coiled-coil protein 1 [MASS=183060]                                                                                                                                      | *    | 1.07  | *    | *    | * | 2 | 2 | KNEEMQNVR                                       | 1 |
|                                                                                                                                                                                                             |      |       |      |      |   |   | 1 | EIVLEDLK                                        | 1 |
| RBP22_HUMAN (Q53T03) Ran-binding protein 2-like 2 (RanBP2L2) [MASS=198922]                                                                                                                                  | *    | 1.02  | *    | *    | * | 1 | 3 | YWVERAAKLFPGSPAIIYK                             | 1 |
| RECK_HUMAN (O95980) Reversion-inducing cysteine-rich protein with Kazal motifs precursor (hRECK) (Suppressor of tumorigenicity 15) (ST15) [MASS=106457]                                                     | 0.00 | 2.27  | 0.30 | 0.00 | 1 | 2 | 2 | MPFINIPVLDIK                                    | 1 |
|                                                                                                                                                                                                             |      |       |      |      |   |   | 2 | C[330]PSLLAAGC[330]K                            | 1 |
| RED2_HUMAN (Q9NS39) Double-stranded RNA-specific editase B2 (EC 3.5.-.-) (dsRNA adenosine deaminase B2) (RNA-dependent adenosine deaminase 3) (RNA-editing deaminase 2) (RNA-editing enzyme 2) [MASS=80621] | 0.00 | 4.06  | 1.85 | 0.00 | 1 | 2 | 2 | M[147]EGVGQLPASYRHNR                            | 1 |
|                                                                                                                                                                                                             |      |       |      |      |   |   | 3 | TPSPGDTPSMYC[339]EAK                            | 1 |
| REXO1_HUMAN (Q8N1G1) RNA exonuclease 1 homolog (EC 3.1.-.-) (Elongin A-binding protein 1) (EloA-BP1) (Transcription elongation factor B polypeptide 3-binding protein 1) [MASS=131529]                      | 0.00 | 5.57  | 0.28 | 0.00 | 1 | 4 | 3 | NRVAGGWETQYM[147]C[330]C[330]SAAAGSVGC[330]QVAK | 1 |
|                                                                                                                                                                                                             |      |       |      |      |   |   | 2 | NIYLNVAVENTLKKLR                                | 1 |
|                                                                                                                                                                                                             |      |       |      |      |   |   | 2 | GGGGGGALEYVPKAVSQPR                             | 1 |
|                                                                                                                                                                                                             |      |       |      |      |   |   | 2 | PKDSSC[339]R                                    | 2 |
| RGS19_HUMAN (P49795) Regulator of G-protein signaling 19 (RGS19) (G-alpha-interacting protein) (GAIP protein) [MASS=24636]                                                                                  | 0.00 | 8.29  | 0.98 | 0.00 | 1 | 1 | 2 | TEYSEENMLFWLAC[330]EELK                         | 1 |

|                                                                                                                                                                                                                                                                             |      |       |      |      |   |   |   |                                 |   |
|-----------------------------------------------------------------------------------------------------------------------------------------------------------------------------------------------------------------------------------------------------------------------------|------|-------|------|------|---|---|---|---------------------------------|---|
| RHOA_HUMAN (P61586) Transforming protein RhoA precursor (H12) [MASS=21768]                                                                                                                                                                                                  | 1.00 | 24.35 | 0.87 | 0.04 | 3 | 3 | 3 | KLVIVGDGAC[339]GKTC[339]LLIVFSK | 1 |
|                                                                                                                                                                                                                                                                             |      |       |      |      |   |   | 2 | HFC[339]PNVP IILVGNK            | 1 |
|                                                                                                                                                                                                                                                                             |      |       |      |      |   |   | 2 | HFC[330]PNVP IILVGNK            | 1 |
|                                                                                                                                                                                                                                                                             |      |       |      |      |   |   | 2 | IGAFGYM[147]EC[339]SAK          | 1 |
| RHOB_HUMAN (P62745) Rho-related GTP-binding protein RhoB precursor (H6) [MASS=22123]                                                                                                                                                                                        | 0.99 | 7.14  | 1.01 | 0.00 | 1 | 1 | 2 | HFC[330]PNVP IILVANK            | 1 |
| RIB1_HUMAN (P04843) Dolichyl-diphosphooligosaccharide--protein glycosyltransferase 67 kDa subunit precursor (EC 2.4.1.119) (Ribophorin I) (RPN-I) [MASS=68569]                                                                                                              | *    | 3.46  | *    | *    | * | 2 | 2 | RIGLYRHFDETVNR                  | 1 |
|                                                                                                                                                                                                                                                                             |      |       |      |      |   |   | 1 | DPAAEAR                         | 1 |
| RIMB1_HUMAN (O95153) Peripheral-type benzodiazepine receptor-associated protein 1 (PRAX-1) (Peripheral benzodiazepine receptor-interacting protein) (PBR-IP) (RIM-binding protein 1) (RIM-BP1) [MASS=200149]                                                                | 0.00 | 0.48  | *    | *    | * | 1 | 1 | NAELAVIAK                       | 1 |
| RIOK1_HUMAN (Q9BRS2) Serine/threonine-protein kinase RIO1 (EC 2.7.11.1) (RIO kinase 1) [MASS=65583]                                                                                                                                                                         | 0.00 | 3.70  | 1.92 | 0.00 | 1 | 1 | 3 | KDC[339]ANVNDFFMRHSAVMTVR       | 1 |
| RIPK2_HUMAN (O43353) Receptor-interacting serine/threonine-protein kinase 2 (EC 2.7.11.1) (RIP-like-interacting CLARP kinase) (Receptor-interacting protein 2) (RIP-2) (CARD-containing interleukin-1 beta-converting enzyme-associated kinase) (CARD-containi [MASS=61195] | *    | 4.81  | *    | *    | * | 1 | 2 | SSKSAPEGGTIIYM[147]PPENYEPGQKSR | 1 |
| RIPK5_HUMAN (Q6XUX3) Receptor-interacting serine/threonine-protein kinase 5 (EC 2.7.11.1) (Dusty protein kinase) (Dusty PK) (RIP-homologous kinase) [MASS=105258]                                                                                                           | *    | 3.23  | *    | *    | * | 2 | 3 | KVAQEAIESLSASK                  | 1 |
|                                                                                                                                                                                                                                                                             |      |       |      |      |   |   | 2 | QEEMKDM[147]IVETLNTMK           | 1 |
| RIR2B_HUMAN (Q7LG56) Ribonucleoside-diphosphate reductase M2 subunit B (EC 1.17.4.1) (TP53-inducible ribonucleotide reductase M2 B) (p53-inducible ribonucleotide reductase small subunit 2-like protein) (p53R2) [MASS=40736]                                              | *    | 4.27  | *    | *    | * | 1 | 2 | EFLFNAIETM[147]PYVKK            | 1 |
| RL10A_HUMAN (P62906) 60S ribosomal protein L10a (CSA-19) [MASS=24700]                                                                                                                                                                                                       | 0.00 | 6.02  | 0.23 | 0.00 | 1 | 1 | 3 | KVLC[330]LAVAVGHVK              | 1 |

|                                                                                                                                                   |      |       |      |      |   |   |   |                                    |   |
|---------------------------------------------------------------------------------------------------------------------------------------------------|------|-------|------|------|---|---|---|------------------------------------|---|
| RL24_HUMAN (P83731) 60S ribosomal protein L24 (Ribosomal protein L30) [MASS=17779]                                                                | 0.00 | 7.64  | 0.81 | 0.00 | 1 | 1 | 2 | M[147]KVELC[330]SFSGYK             | 1 |
| RL9_HUMAN (P32969) 60S ribosomal protein L9 [MASS=21863]                                                                                          | 1.00 | 13.02 | 0.95 | 0.01 | 2 | 2 | 2 | TIC[339]SHVQNM[147]IK              | 1 |
| RNBP6_HUMAN (O60518) Ran-binding protein 6 (RanBP6) [MASS=124713]                                                                                 | *    | 2.17  | *    | *    | * | 1 | 3 | MRPGVAC[330]SVSQAQK                | 1 |
| RNF31_HUMAN (Q96EP0) RING finger protein 31 (Zinc in-between-RING-finger ubiquitin-associated domain protein) [MASS=119651]                       | *    | 3.64  | *    | *    | * | 2 | 3 | TQSDLNNM[147]EDDDPQTSYM[147]VSAWAR | 1 |
|                                                                                                                                                   |      |       |      |      |   |   | 2 | GLGLGTEGPQGTGGLEPDLAR              | 1 |
|                                                                                                                                                   |      |       |      |      |   |   | 2 | LLQDNNVMFNTEPPAGAR                 | 1 |
| RPC1_HUMAN (O14802) DNA-directed RNA polymerase III largest subunit (EC 2.7.7.6) (RPC155) (RPC1) [MASS=155748]                                    | *    | 3.45  | *    | *    | * | 2 | 3 | SSTGDIIQFIYGGDGLDPAAMEGKDEPLEFKR   | 1 |
|                                                                                                                                                   |      |       |      |      |   |   | 2 | KNIC[330]HHC[339]GAFNGTVKK         | 1 |
| RPP29_HUMAN (O95707) Ribonuclease P protein subunit p29 (EC 3.1.26.5) (hPOP4) [MASS=25425]                                                        | 0.00 | 16.36 | 0.84 | 0.00 | 1 | 2 | 2 | STPRM[147]SPQAREDQLQR              | 2 |
|                                                                                                                                                   |      |       |      |      |   |   | 3 | LNC[339]VFTVETDGFISYIYGSK          | 1 |
| RPTN_HUMAN (Q6XPR3) Repetin [MASS=90730]                                                                                                          | *    | 3.06  | *    | *    | * | 1 | 2 | QDGDSSHGQPERQDRDRSHHGQSEK          | 1 |
| RPTOR_HUMAN (Q8N122) Regulatory-associated protein of mTOR (Raptor) (P150 target of rapamycin (TOR)-scaffold protein) [MASS=149037]               | 0.00 | 2.40  | 1.53 | 0.00 | 1 | 2 | 3 | HC[339]EKIEGSKSLAQSWR              | 1 |
|                                                                                                                                                   |      |       |      |      |   |   | 2 | GPEQTADDADDAAGHK                   | 1 |
| RS8_HUMAN (P62241) 40S ribosomal protein S8 [MASS=24074]                                                                                          | 0.00 | 5.80  | 0.34 | 0.00 | 1 | 1 | 2 | NC[330]IVLIDSTPYR                  | 1 |
| RSMB_HUMAN (P14678) Small nuclear ribonucleoprotein-associated proteins B and B' (snRNP-B) (Sm protein B/B') (Sm-B/Sm-B') (SmB/SmB') [MASS=24610] | *    | 7.50  | *    | *    | * | 1 | 3 | C[339]ILQDGRIFIGTFKAFDK            | 1 |
| RT06_HUMAN (P82932) Mitochondrial 28S ribosomal protein S6 (S6mt) (MRP-S6) [MASS=14095]                                                           | 0.40 | 16.94 | 0.95 | 0.00 | 1 | 1 | 3 | HPLTQELKEC[330]EGIVPVPLAEK         | 1 |
| RT32_HUMAN (Q9Y6G3) Mitochondrial 28S ribosomal protein S32 (S32mt) (MRP-S32) [MASS=16661]                                                        | *    | 4.23  | *    | *    | * | 1 | 1 | NLNPPK                             | 1 |
| RTEL1_HUMAN (Q9NZ71) Regulator of telomere elongation helicase 1 (EC 3.6.1.-) (Helicase-like protein NHL) [MASS=152373]                           | *    | 0.86  | *    | *    | * | 1 | 3 | FSM[147]FVRPHHKQR                  | 1 |

|                                                                                                                                                                                                                                                                             |      |       |      |      |   |   |   |                                            |   |
|-----------------------------------------------------------------------------------------------------------------------------------------------------------------------------------------------------------------------------------------------------------------------------|------|-------|------|------|---|---|---|--------------------------------------------|---|
| RTN4_HUMAN (Q9NQC3) Reticulon-4 (Neurite outgrowth inhibitor) (Nogo protein) (Focnen) (Neuroendocrine-specific protein) (NSP) (Neuroendocrine-specific protein C homolog) (RTN-x) (Reticulon-5) [MASS=129930]                                                               | 0.47 | 6.46  | 1.36 | 0.00 | 1 | 3 | 3 | EPENINAALQETEAPYISIAc[330]DLIK             | 1 |
|                                                                                                                                                                                                                                                                             |      |       |      |      |   |   | 3 | SEIANAPDGAGSLPC[339]TElPHDLsLKNIQPK        | 1 |
|                                                                                                                                                                                                                                                                             |      |       |      |      |   |   | 3 | IPLQMEELSTAVYSNDdLFISK                     | 1 |
| S10AB_HUMAN (P31949) Protein S100-A11 (S100 calcium-binding protein A11) (Protein S100C) (Calgizzarin) (MLN 70) [MASS=11740]                                                                                                                                                | 1.00 | 30.48 | 1.28 | 0.02 | 3 | 1 | 3 | KLDTNSDGQLDFSEFLNLIGGLAM[147]Ac[339]HDSFLK | 1 |
|                                                                                                                                                                                                                                                                             |      |       |      |      |   |   | 3 | KLDTNSDGQLDFSEFLNLIGGLAMAc[339]HDSFLK      | 1 |
|                                                                                                                                                                                                                                                                             |      |       |      |      |   |   | 3 | KLDTNSDGQLDFSEFLNLIGGLAM[147]Ac[330]HDSFLK | 1 |
| S5A1_HUMAN (P18405) 3-oxo-5-alpha-steroid 4-dehydrogenase 1 (EC 1.3.99.5) (Steroid 5-alpha-reductase 1) (SR type 1) (S5AR) [MASS=29458]                                                                                                                                     | 0.00 | 10.42 | 3.60 | 0.00 | 1 | 2 | 3 | C[339]LIYPFLM[147]R                        | 1 |
|                                                                                                                                                                                                                                                                             |      |       |      |      |   |   | 2 | SAPNC[330]ILLAMFLVHYGHR                    | 1 |
| SACS_HUMAN (Q9NZJ4) Sacsin [MASS=436973]                                                                                                                                                                                                                                    | 0.00 | 1.20  | 0.63 | 0.00 | 1 | 2 | 3 | LRSDGAELLMFLNHM[147]EKISIC[339]EIDK        | 1 |
|                                                                                                                                                                                                                                                                             |      |       |      |      |   |   | 3 | VFHALMKAGC[330]IQLALNKIC[330]SK            | 1 |
| SAM50_HUMAN (Q9Y512) Sorting and assembly machinery component 50 homolog [MASS=51962]                                                                                                                                                                                       | 1.00 | 7.89  | 1.18 | 0.04 | 3 | 3 | 2 | IC[339]DGVQFGAGIR                          | 1 |
|                                                                                                                                                                                                                                                                             |      |       |      |      |   |   | 2 | TKDDIIIC[339]EIGDVFk                       | 1 |
|                                                                                                                                                                                                                                                                             |      |       |      |      |   |   | 2 | TKDDIIIC[330]EIGDVFk                       | 1 |
|                                                                                                                                                                                                                                                                             |      |       |      |      |   |   | 2 | EKLLRLGIFR                                 | 1 |
| SAMH1_HUMAN (Q9Y3Z3) SAM domain and HD domain-containing protein 1 (Dendritic cell-derived IFNG-induced protein) (DCIP) (Monocyte protein 5) (MOP-5) [MASS=72200]                                                                                                           | 0.67 | 2.56  | 2.43 | 0.00 | 1 | 1 | 3 | ENEITGALLPC[339]LDESr                      | 1 |
| SAP_HUMAN (P07602) Proactivator polypeptide precursor [Contains: Saposin A (Protein A); Saposin B-Val; Saposin B (Sphingolipid activator protein 1) (SAP-1) (Cerebroside sulfate activator) (CSAct) (Dispersin) (Sulfatide/GM1 activator); Saposin C (Co-beta- [MASS=58112] | 1.00 | 5.34  | 1.06 | 0.06 | 6 | 2 | 2 | GC[339]SFLPDPYQK                           | 3 |
|                                                                                                                                                                                                                                                                             |      |       |      |      |   |   | 2 | GC[330]SFLPDPYQK                           | 3 |
|                                                                                                                                                                                                                                                                             |      |       |      |      |   |   | 3 | VASKNVIPALELVEPIK                          | 1 |
| SATT_HUMAN (P43007) Neutral amino acid transporter A (SATT) (Alanine/serine/cysteine/threonine transporter) (ASCT1) [MASS=55723]                                                                                                                                            | 1.00 | 6.77  | 0.78 | 0.01 | 2 | 2 | 3 | M[147]IILPLVVC[339]SLVSGAASLDASC[330]LGR   | 1 |
|                                                                                                                                                                                                                                                                             |      |       |      |      |   |   | 2 | C[339]IEENNGVDKR                           | 1 |
|                                                                                                                                                                                                                                                                             |      |       |      |      |   |   | 2 | C[330]IEENNGVDKR                           | 1 |
| SCAM4_HUMAN (Q969E2) Secretory carrier-associated membrane protein 4 (Secretory carrier membrane protein 4) [MASS=25728]                                                                                                                                                    | 0.00 | 10.92 | 0.90 | 0.00 | 1 | 1 | 3 | FIPVKPC[330]FYQNFsDEIPVEHQVLVK             | 1 |

|                                                                                                                                                                                                                                                            |      |       |      |      |   |   |   |                                      |   |
|------------------------------------------------------------------------------------------------------------------------------------------------------------------------------------------------------------------------------------------------------------|------|-------|------|------|---|---|---|--------------------------------------|---|
| SCOT_HUMAN (P55809) Succinyl-CoA:3-ketoacid-coenzyme A transferase 1, mitochondrial precursor (EC 2.8.3.5) (Somatic-type succinyl CoA:3-oxoacid CoA-transferase) (Scot-S) [MASS=56157]                                                                     | 1.00 | 9.04  | 1.24 | 0.24 | 5 | 3 | 2 | STGC[339]DFAVSPK                     | 2 |
|                                                                                                                                                                                                                                                            |      |       |      |      |   |   | 2 | STGC[330]DFAVSPK                     | 1 |
|                                                                                                                                                                                                                                                            |      |       |      |      |   |   | 2 | DIPDGATVLVGGFGLC[339]GIPENLIDALLK    | 1 |
|                                                                                                                                                                                                                                                            |      |       |      |      |   |   | 2 | C[339]TLPLTGK                        | 1 |
| SCRN1_HUMAN (Q12765) Secernin-1 [MASS=46382]                                                                                                                                                                                                               | 0.00 | 4.11  | 0.88 | 0.00 | 1 | 1 | 2 | TQSPC[330]FGDDDPAPKEPR               | 1 |
| SEM3A_HUMAN (Q14563) Semaphorin-3A precursor (Semaphorin III) (Sema III) [MASS=88889]                                                                                                                                                                      | *    | 1.30  | *    | *    | * | 1 | 2 | ALVYWQFQRR                           | 1 |
| SEM3D_HUMAN (O95025) Semaphorin-3D precursor [MASS=89651]                                                                                                                                                                                                  | *    | 1.54  | *    | *    | * | 1 | 3 | IPYPRPGTC[330]PSK                    | 2 |
| SENP6_HUMAN (Q9GZR1) Sentrin-specific protease 6 (EC 3.4.22.-) (Sentrin/SUMO-specific protease SENP6) (SUMO-1-specific protease 1) [MASS=126144]                                                                                                           | 0.00 | 2.07  | 2.23 | 0.00 | 1 | 2 | 1 | KARMK                                | 1 |
|                                                                                                                                                                                                                                                            |      |       |      |      |   |   | 2 | RHC[339]STYQPTPPLSPASKK              | 1 |
| SEPT7_HUMAN (Q16181) Septin-7 (CDC10 protein homolog) [MASS=50680]                                                                                                                                                                                         | 0.97 | 3.20  | 0.94 | 0.00 | 1 | 1 | 2 | ADTLTPEEC[330]QQFKK                  | 1 |
| SEPT8_HUMAN (Q92599) Septin-8 [MASS=55625]                                                                                                                                                                                                                 | 0.98 | 12.86 | 1.06 | 0.00 | 1 | 3 | 3 | DESYRPVDYIDAQFENYLQEELK              | 1 |
|                                                                                                                                                                                                                                                            |      |       |      |      |   |   | 2 | SVTQGFNFILC[339]VGETGIGK             | 1 |
|                                                                                                                                                                                                                                                            |      |       |      |      |   |   | 3 | NRSDIGAHQPGMSLSSSK                   | 1 |
| SERA_HUMAN (O43175) D-3-phosphoglycerate dehydrogenase (EC 1.1.1.95) (3-PGDH) [MASS=56519]                                                                                                                                                                 | 0.99 | 3.57  | 1.04 | 0.00 | 1 | 1 | 2 | ALVDHENVISC[330]PHLGASTK             | 1 |
| SETB2_HUMAN (Q96T68) Probable histone-lysine N-methyltransferase, H3 lysine-9 specific (EC 2.1.1.43) (Histone H3-K9 methyltransferase) (H3-K9-HMTase) (SET domain bifurcated 2) (Chronic lymphocytic leukemia deletion region gene 8 protein) [MASS=81854] | *    | 2.09  | *    | *    | * | 1 | 2 | EILSLEDKVVDFREK                      | 1 |
| SFR15_HUMAN (O95104) Splicing factor, arginine/serine-rich 15 (CTD-binding SR-like protein RA4) [MASS=125868]                                                                                                                                              | *    | 5.14  | *    | *    | * | 3 | 3 | PM[147]PPHMMHRGPPPGGGFAMPPPHGM[147]K | 1 |
|                                                                                                                                                                                                                                                            |      |       |      |      |   |   | 3 | HRDLEERNR                            | 1 |
|                                                                                                                                                                                                                                                            |      |       |      |      |   |   | 3 | MDAVNAFNQELFSLMDM[147]KPPISR         | 1 |
| SFRP3_HUMAN (Q92765) Secreted frizzled-related protein 3 precursor (sFRP-3) (Frizzled-related protein 1) (FrzB-1) (Frezzed) (Fritz) [MASS=36254]                                                                                                           | 0.00 | 4.00  | 0.10 | 0.00 | 1 | 1 | 3 | MVC[330]GSPGGMLLLR                   | 1 |



|                                                                                                                                                                                                                                                                              |      |       |      |      |   |   |                                                                                                                      |                                       |   |
|------------------------------------------------------------------------------------------------------------------------------------------------------------------------------------------------------------------------------------------------------------------------------|------|-------|------|------|---|---|----------------------------------------------------------------------------------------------------------------------|---------------------------------------|---|
| SFRP4_HUMAN (Q6FHJ7) Secreted frizzled-related protein 4 precursor (sFRP-4) (Frizzled protein, human endometrium) (FrpHE) [MASS=39827]                                                                                                                                       | 0.00 | 3.76  | 0.26 | 0.00 | 1 | 1 | 2                                                                                                                    | M[147]M[147]LLENC[330]LVEKWR          | 1 |
| SHPS1_HUMAN (P78324) Tyrosine-protein phosphatase non-receptor type substrate 1 precursor (SHP substrate 1) (SHPS-1) (Inhibitory receptor SHPS-1) (Signal-regulatory protein alpha-1) (Sirp-alpha-1) (Sirp-alpha-2) (Sirp-alpha-3) (MyD-1 antigen) (Brain Ig-I) [MASS=54812] | 0.76 | 2.98  | 1.19 | 0.00 | 1 | 1 | 2                                                                                                                    | LTC[330]QVEHDGQPAVSK                  | 2 |
| SIA4C_HUMAN (Q11206) CMP-N-acetylneuraminate-beta-galactosamide-alpha-2,3-sialyltransferase (EC 2.4.99.-) (Beta-galactoside alpha-2,3-sialyltransferase) (Alpha 2,3-sialyltransferase IV) (Alpha 2,3-ST) (GalNAc6S) (STZ) (SIAT4-C) (ST3Gal III) (SAT-3) (ST- [MASS=38045]   | *    | 9.61  | *    | *    | * | 1 | 3                                                                                                                    | PTTGLLAITLALHLC[330]DLVHIAGFGYPDAYNKK | 1 |
| SIN3B_HUMAN (O75182) Paired amphipathic helix protein Sin3b (Transcriptional corepressor Sin3b) (Histone deacetylase complex subunit Sin3b) [MASS=133066]                                                                                                                    | *    | 1.29  | *    | *    | * | 1 | 3                                                                                                                    | EM[147]FTIHAYVGFTMDK                  | 1 |
| SIPA1_HUMAN (Q96FS4) Signal-induced proliferation-associated protein 1 (Sipa-1) (GTPase-activating protein Spa-1) (p130 SPA-1) [MASS=112148]                                                                                                                                 | 0.00 | 5.85  | 1.03 | 0.00 | 1 | 3 | 3 VAAGAQASGPEGIEVPC[330]LLGISAEALVLVAPR<br>3 SGSDAGEARPPPTPASPRAR<br>2 PGSPSGSEDK                                    | 1<br>1<br>1                           |   |
| SIRB1_HUMAN (O00241) Signal-regulatory protein beta-1 precursor (SIRP-beta-1) (CD172b antigen) [MASS=43255]                                                                                                                                                                  | 0.22 | 8.29  | 1.24 | 0.00 | 1 | 2 | 3 GLQLTWLENGNVS<br>3 ATPEHTVSFTC[339]ESHGFSPR                                                                        | 1<br>1                                |   |
| SIRT2_HUMAN (Q8IXJ6) NAD-dependent deacetylase sirtuin-2 (EC 3.5.1.-) (SIR2-like) (SIR2-like protein 2) [MASS=43182]                                                                                                                                                         | 1.00 | 12.08 | 1.01 | 0.01 | 2 | 2 | 3 C[339]EDC[339]QSLVKPDIVFFGESLPR<br>3 EKAGQSDPFLGM[147]IM[147]GLGGGM[147]DFDSK<br>3 C[330]EDC[330]QSLVKPDIVFFGESLPR | 1<br>1<br>1                           |   |
| SLIK4_HUMAN (Q8IW52) SLIT and NTRK-like protein 4 precursor [MASS=94330]                                                                                                                                                                                                     | *    | 3.82  | *    | *    | * | 2 | 2 KRLSTIDELDELFPSR<br>3 C[330]ETPVQFANIELKSLK                                                                        | 1<br>1                                |   |
| SLIT2_HUMAN (O94813) Slit homolog 2 protein precursor (Slit-2) [Contains: Slit homolog 2 protein N-product; Slit homolog 2 protein C-product] [MASS=169869]                                                                                                                  | 0.00 | 2.22  | 0.73 | 0.00 | 1 | 2 | 3 INEPIC[330]QC[330]LPGYQGEK<br>3 TSPC[339]DNFDC[339]QNGAQC[339]IVR                                                  | 1<br>1                                |   |

|                                                                                                                                                                                                                                 |                      |      |      |      |   |   |   |                                |    |
|---------------------------------------------------------------------------------------------------------------------------------------------------------------------------------------------------------------------------------|----------------------|------|------|------|---|---|---|--------------------------------|----|
| SMAD6_HUMAN (O43541) Mothers against decapentaplegic homolog 6 (SMAD 6) (Mothers against DPP homolog 6) (Smad6) (hSMAD6) [MASS=53496]                                                                                           | 0.00                 | 3.43 | 0.93 | 0.00 | 1 | 2 | 2 | GGVPGGC[339]VLVPR              | 1  |
|                                                                                                                                                                                                                                 |                      |      |      |      |   |   | 1 | M[147]FRSK                     | 2  |
| SMBT2_HUMAN (Q5VUG0) Scm-like with four MBT domains protein 2 [MASS=100562]                                                                                                                                                     | 0.00                 | 1.45 | 1.19 | 0.00 | 1 | 1 | 2 | QHGAQEAPPFC[339]FR             | 1  |
|                                                                                                                                                                                                                                 |                      |      |      |      |   |   | 2 | ESELTDEDITTILERGEKK            | 1  |
|                                                                                                                                                                                                                                 |                      |      |      |      |   |   | 2 | LLNILM[147]QLRK                | 1  |
|                                                                                                                                                                                                                                 |                      |      |      |      |   |   | 2 | GYEYC[339]R                    | 18 |
| SMCA1_HUMAN (P28370) Probable global transcription activator SNF2L1 (EC 3.6.1.-) (ATP-dependent helicase SMARCA1) (SWI/SNF-related matrix-associated actin-dependent regulator of chromatin subfamily A member 1) [MASS=114731] | *                    | 9.12 | *    | *    | * | 6 |   |                                |    |
|                                                                                                                                                                                                                                 |                      |      |      |      |   |   |   |                                |    |
| SMG1_HUMAN (Q96Q15) Serine/threonine-protein kinase SMG1 (EC 2.7.11.1) (SMG-1) (hSMG-1) (Lambda/iota protein kinase C-interacting protein) (Lambda-interacting protein) (61E3.4) [MASS=410259]                                  | 0.00                 | 1.50 | 0.52 | 0.00 | 1 | 6 | 3 | NYTEEDRFLIC[330]MLHKM[147]GFDR | 1  |
|                                                                                                                                                                                                                                 |                      |      |      |      |   |   | 3 | PPKQPNVQDFQFFPPR               | 1  |
|                                                                                                                                                                                                                                 |                      |      |      |      |   |   | 2 | ILM[147]KDIDVLNSSGKMDK         | 1  |
|                                                                                                                                                                                                                                 |                      |      |      |      |   |   | 2 | DWPLHVMK                       | 1  |
|                                                                                                                                                                                                                                 |                      |      |      |      |   |   | 1 | AVRDPK                         | 1  |
|                                                                                                                                                                                                                                 |                      |      |      |      |   |   | 3 | NSC[330]FSEDQMAK               | 1  |
| 1                                                                                                                                                                                                                               | FSSSAK               | 1    |      |      |   |   |   |                                |    |
| 2                                                                                                                                                                                                                               | SM[147]SYSDESRLSNLLR | 1    |      |      |   |   |   |                                |    |
| 2                                                                                                                                                                                                                               | GIIPQLFSR            | 2    |      |      |   |   |   |                                |    |

|                                                                                                                                                                                                                                                                              |      |      |      |      |   |   |   |                                                           |        |
|------------------------------------------------------------------------------------------------------------------------------------------------------------------------------------------------------------------------------------------------------------------------------|------|------|------|------|---|---|---|-----------------------------------------------------------|--------|
| SMRA3_HUMAN (Q14527) SWI/SNF-related matrix-associated actin-dependent regulator of chromatin subfamily A member 3 (EC 3.6.1.-) (Sucrose nonfermenting protein 2-like 3) (DNA-binding protein/plasminogen activator inhibitor 1 regulator) (Helicase-like tran [MASS=113928] | 0.00 | 4.26 | 0.30 | 0.00 | 1 | 2 | 3 | SDMEWTSSSKINALM[147]HALTDLRK<br>VIEDVAFAC[330]ALTSSVPTTKK | 1<br>1 |
| SMRC1_HUMAN (Q92922) SWI/SNF-related matrix-associated actin-dependent regulator of chromatin subfamily C member 1 (SWI/SNF complex 155 kDa subunit) (BRG1-associated factor 155) [MASS=122752]                                                                              | *    | 2.53 | *    | *    | * | 2 | 2 | NKEKPVLDLQNFGLR<br>AGGALC[330]HILGAAYK                    | 1<br>2 |
| SMYD4_HUMAN (Q8IYR2) SET and MYND domain-containing protein 4 [MASS=89122]                                                                                                                                                                                                   | 0.00 | 1.62 | 0.87 | 0.00 | 1 | 1 | 2 | KGQEILHC[339]YGPHK                                        | 1      |
| SNAB_HUMAN (Q9H115) Beta-soluble NSF attachment protein (SNAP-beta) (N-ethylmaleimide-sensitive factor attachment protein, beta) [MASS=33557]                                                                                                                                | 0.85 | 7.72 | 0.95 | 0.00 | 1 | 2 | 2 | AALC[339]HFIVDELNAK<br>VKASHSFLR                          | 1<br>2 |
| SNX13_HUMAN (Q9Y5W8) Sorting nexin-13 (RGS domain- and PHOX domain-containing protein) (RGS-PX1) [MASS=112188]                                                                                                                                                               | *    | 2.89 | *    | *    | * | 1 | 3 | DSNC[330]NYEAFMNIILSDNIGELEAVRDK                          | 1      |
| SP110_HUMAN (Q9HB58) Sp110 nuclear body protein (Speckled 110 kDa) (Transcriptional coactivator Sp110) (Interferon-induced protein 41/75) [MASS=78504]                                                                                                                       | *    | 4.21 | *    | *    | * | 2 | 3 | MYMESLEAC[339]RNLIIPVSR<br>PKSDTVDFHC[330]SK              | 1<br>1 |
| SPS1_HUMAN (P49903) Selenide, water dikinase 1 (EC 2.7.9.3) (Selenophosphate synthetase 1) (Selenium donor protein 1) [MASS=42910]                                                                                                                                           | 0.00 | 3.32 | 1.41 | 0.00 | 1 | 1 | 2 | LTRFTELKGTGC[339]K                                        | 1      |
| SRA1_HUMAN (Q9HD15) Steroid receptor RNA activator 1 (Steroid receptor RNA activator protein) (SRAP) [MASS=25673]                                                                                                                                                            | *    | 9.32 | *    | *    | * | 1 | 3 | RM[147]ALLVQELSSHRWDAADDIHR                               | 1      |
| SRBS1_HUMAN (Q9BX66) Sorbin and SH3 domain-containing protein 1 (Ponsin) (c-Cbl-associated protein) (CAP) (SH3 domain protein 5) (SH3P12) [MASS=142454]                                                                                                                      | *    | 1.01 | *    | *    | * | 1 | 2 | LITPAPSSLPHSR                                             | 1      |

|                                                                                                                                                                                                                                                 |      |      |      |      |   |   |   |                                                |   |
|-------------------------------------------------------------------------------------------------------------------------------------------------------------------------------------------------------------------------------------------------|------|------|------|------|---|---|---|------------------------------------------------|---|
| SRPR_HUMAN (P08240) Signal recognition particle receptor subunit alpha (SR-alpha) (Docking protein alpha) (DP-alpha) [MASS=69811]                                                                                                               | *    | 2.98 | *    | *    | * | 2 | 2 | KPVRSM[147]IETR                                | 1 |
|                                                                                                                                                                                                                                                 |      |      |      |      |   |   | 1 | PVRSMIETR                                      | 1 |
| SSDH_HUMAN (P51649) Succinate semialdehyde dehydrogenase, mitochondrial precursor (EC 1.2.1.24) (NAD(+)-dependent succinic semialdehyde dehydrogenase) [MASS=57214]                                                                             | 1.00 | 5.79 | 0.93 | 0.01 | 2 | 1 | 3 | NFFEPTLLC[339]NVTQDMLC[339]THEETFGLPAPVIK      | 1 |
|                                                                                                                                                                                                                                                 |      |      |      |      |   |   | 3 | NFFEPTLLC[339]NVTQDM[147]LC[339]THEETFGLPAPVIK | 1 |
| STOX1_HUMAN (Q6ZVD7) Storkhead-box protein 1 (Winged helix domain-containing protein) [MASS=110961]                                                                                                                                             | 0.00 | 1.82 | 0.43 | 0.00 | 1 | 1 | 2 | MARPVQLAPGSLALVLC[330]R                        | 1 |
| STXB1_HUMAN (P61764) Syntaxin-binding protein 1 (Unc-18 homolog) (Unc-18A) (Unc-18-1) (N-Sec1) (p67) [MASS=67568]                                                                                                                               | 1.00 | 7.91 | 1.01 | 0.07 | 2 | 3 | 3 | ELSKYSTHLHLAEDC[339]MK                         | 1 |
|                                                                                                                                                                                                                                                 |      |      |      |      |   |   | 3 | AAHVFFTDSC[330]PDALFNELVK                      | 1 |
|                                                                                                                                                                                                                                                 |      |      |      |      |   |   | 2 | AAHVFFTDSC[330]PDALFNELVK                      | 1 |
|                                                                                                                                                                                                                                                 |      |      |      |      |   |   | 2 | SVHSLISDFK                                     | 1 |
| SUCA_HUMAN (P53597) Succinyl-CoA ligase [GDP-forming] alpha-chain, mitochondrial precursor (EC 6.2.1.4) (Succinyl-CoA synthetase, alpha chain) (SCS-alpha) [MASS=35047]                                                                         | 0.00 | 9.61 | 0.74 | 0.00 | 1 | 2 | 3 | QGTFHSQQALEYGTKLVGGTTPGK                       | 1 |
|                                                                                                                                                                                                                                                 |      |      |      |      |   |   | 2 | HC[339]SYTASR                                  | 1 |
| SUCB1_HUMAN (Q9P2R7) Succinyl-CoA ligase [ADP-forming] beta-chain, mitochondrial precursor (EC 6.2.1.5) (Succinyl-CoA synthetase, betaA chain) (SCS-betaA) (ATP-specific succinyl-CoA synthetase subunit beta) (NY-REN-39 antigen) [MASS=50317] | 0.30 | 6.48 | 1.03 | 0.00 | 1 | 1 | 3 | ANLNYIGLDGNIGC[339]LVNGAGLAM[147]ATM[147]DIIK  | 1 |
| SUHW4_HUMAN (Q6N043) Suppressor of hairy wing homolog 4 [MASS=109298]                                                                                                                                                                           | 0.00 | 2.04 | 0.96 | 0.00 | 1 | 2 | 1 | VNPSSYSR                                       | 1 |
|                                                                                                                                                                                                                                                 |      |      |      |      |   |   | 2 | C[339]NIHFNLLDPLK                              | 1 |
| SYA_HUMAN (P49588) Alanyl-tRNA synthetase (EC 6.1.1.7) (Alanine--tRNA ligase) (AlaRS) (NY-REN-42 antigen) [MASS=106801]                                                                                                                         | 0.99 | 1.96 | 0.76 | 0.00 | 1 | 1 | 2 | NVGC[330]LQEALQLATSFAQLR                       | 1 |
| SYIM_HUMAN (Q9NSE4) Isoleucyl-tRNA synthetase, mitochondrial precursor (EC 6.1.1.5) (Isoleucine--tRNA ligase) (IleRS) [MASS=113791]                                                                                                             | 0.91 | 5.73 | 1.31 | 0.00 | 1 | 3 | 2 | SYKPVFWSPSSR                                   | 1 |
|                                                                                                                                                                                                                                                 |      |      |      |      |   |   | 2 | SC[339]QTALVEILDVIVR                           | 1 |
|                                                                                                                                                                                                                                                 |      |      |      |      |   |   | 3 | SVSGASNHQPNSNSGRYRDTVLLPQTSFPMK                | 1 |

|                                                                                                                                                                                                          |      |      |      |      |   |   |   |                                                                                                                                 |                  |
|----------------------------------------------------------------------------------------------------------------------------------------------------------------------------------------------------------|------|------|------|------|---|---|---|---------------------------------------------------------------------------------------------------------------------------------|------------------|
| SYLC_HUMAN (Q9P2J5) Leucyl-tRNA synthetase, cytoplasmic (EC 6.1.1.4) (Leucine--tRNA ligase) (LeuRS) [MASS=134465]                                                                                        | 0.00 | 2.38 | 1.34 | 0.00 | 1 | 2 | 3 | IEIRQGDNC[330]DSIIRR<br>C[339]EFAVGYQRLK GK                                                                                     | 1<br>1           |
| SYN1_HUMAN (P17600) Synapsin-1 (Synapsin I) (Brain protein 4.1) [MASS=74111]                                                                                                                             | *    | 1.42 | *    | *    | * | 1 | 2 | MGHAHSGM[147]GK                                                                                                                 | 2                |
| SYNE2_HUMAN (Q8WXH0) Nesprin-2 (Nuclear envelope spectrin repeat protein 2) (Syne-2) (Synaptic nuclear envelope protein 2) (Nucleus and actin connecting element protein) (Protein NUANCE) [MASS=796379] | 0.00 | 1.37 | 1.23 | 0.00 | 1 | 4 | 3 | QILNNYSAQFSLEHMSPDQADKLPQLQGEIER<br>2 KAAIKPLEQTEC[339]LNK<br>3 EHEAC[339]FSEEGC[339]LYQLNHHMEVLR<br>3 ELIKELEQSLASWTQNLKELQTMK | 1<br>1<br>1<br>1 |
| SYPH_HUMAN (P08247) Synaptophysin (Major synaptic vesicle protein p38) [MASS=33845]                                                                                                                      | 0.99 | 3.83 | 0.76 | 0.00 | 1 | 1 | 2 | LHQVYFDAPTC[330]R                                                                                                               | 1                |
| SYPM_HUMAN (Q7L3T8) Probable prolyl-tRNA synthetase, mitochondrial precursor (EC 6.1.1.15) (Proline--tRNA ligase) (ProRS) [MASS=53262]                                                                   | 0.00 | 3.58 | 0.83 | 0.00 | 1 | 1 | 2 | VLSLQDKSDDLTC[330]KSQR                                                                                                          | 1                |
| SYT11_HUMAN (Q9BT88) Synaptotagmin-11 (Synaptotagmin XI) (SytXI) [MASS=48306]                                                                                                                            | *    | 6.26 | *    | *    | * | 2 | 1 | MAEITNIR<br>3 ARHLPKM[147]DITGLSGNPYVK                                                                                          | 1<br>1           |
| SYT1_HUMAN (P21579) Synaptotagmin-1 (Synaptotagmin I) (SytI) (p65) [MASS=47573]                                                                                                                          | 0.64 | 2.13 | 0.96 | 0.00 | 1 | 1 | 2 | LGDIC[330]FSLR                                                                                                                  | 1                |
| T2R60_HUMAN (P59551) Taste receptor type 2 member 60 (T2R60) (T2R56) [MASS=36336]                                                                                                                        | 0.38 | 7.55 | 0.71 | 0.00 | 1 | 1 | 3 | MITWTM[147]PTAVFFIC[330]M[147]ILLITSLGR                                                                                         | 1                |
| TACT_HUMAN (P40200) T-cell surface protein tactile precursor (CD96 antigen) [MASS=63887]                                                                                                                 | *    | 4.39 | *    | *    | * | 1 | 3 | DGM[147]SWPVIVAALLFC[339]C[339]MILFGLGVR                                                                                        | 1                |
| TAF6_HUMAN (P49848) Transcription initiation factor TFIIID subunit 6 (Transcription initiation factor TFIIID 70 kDa subunit) (TAF(II)70) (TAFII-70) (TAFII-80) (TAFII80) [MASS=72668]                    | 0.00 | 6.35 | 0.36 | 0.00 | 1 | 2 | 3 | GGPTSHPSVPPPASSPSPLSGSALC[330]GGK<br>2 PTLTLSQAPQPGPR                                                                           | 1<br>1           |
| TAI12_HUMAN (Q9H175) TGF-beta-induced apoptosis protein 12 (TAIP-12) [MASS=59591]                                                                                                                        | 0.00 | 1.66 | 0.14 | 0.00 | 1 | 1 | 3 | MSFPC[330]GC[330]SR                                                                                                             | 1                |

|                                                                                                                                   |      |       |      |      |    |   |  |   |                                           |   |
|-----------------------------------------------------------------------------------------------------------------------------------|------|-------|------|------|----|---|--|---|-------------------------------------------|---|
|                                                                                                                                   |      |       |      |      |    |   |  | 2 | SIQFVDWC[330]PTGFK                        | 1 |
|                                                                                                                                   |      |       |      |      |    |   |  | 2 | AYHEQLSVAEITNAC[330]FEPANQM[147]VK        | 1 |
|                                                                                                                                   |      |       |      |      |    |   |  | 2 | YMAC[339]C[339]LLYR                       | 1 |
|                                                                                                                                   |      |       |      |      |    |   |  | 3 | AYHEQLSVAEITNAC[339]FEPANQM[147]VK        | 1 |
|                                                                                                                                   |      |       |      |      |    |   |  | 3 | AYHEQLSVAEITNAC[330]FEPANQMVK             | 1 |
|                                                                                                                                   |      |       |      |      |    |   |  | 2 | YMAC[330]C[330]LLYR                       | 1 |
|                                                                                                                                   |      |       |      |      |    |   |  | 2 | RSIQFVDWC[339]PTGFK                       | 1 |
|                                                                                                                                   |      |       |      |      |    |   |  | 2 | AVC[330]M[147]LSNTTAIAEAWAR               | 2 |
| TBA1_HUMAN (P68366) Tubulin alpha-1 chain<br>(Alpha-tubulin 1) (Testis-specific alpha-tubulin)<br>(Tubulin H2-alpha) [MASS=49924] | 1.00 | 28.79 | 1.12 | 0.08 | 9  | 7 |  | 2 | TIGGGDDSFSTFFC[330]ETGAGK                 | 1 |
|                                                                                                                                   |      |       |      |      |    |   |  | 2 | YM[147]AC[339]C[339]LLYR                  | 1 |
|                                                                                                                                   |      |       |      |      |    |   |  | 2 | SIQFVDWC[339]PTGFK                        | 4 |
|                                                                                                                                   |      |       |      |      |    |   |  | 2 | AYHEQLSVAEITNAC[330]FEPANQMVK             | 1 |
|                                                                                                                                   |      |       |      |      |    |   |  | 2 | YM[147]AC[330]C[330]LLYR                  | 1 |
|                                                                                                                                   |      |       |      |      |    |   |  | 2 | AVC[339]M[147]LSNTTAIAEAWAR               | 1 |
|                                                                                                                                   |      |       |      |      |    |   |  | 2 | TIGGGDDSFSTFFC[339]ETGAGK                 | 1 |
|                                                                                                                                   |      |       |      |      |    |   |  | 3 | LSDQC[339]TGLQGFLVFHSGGGTSGGFTSLLM[147]ER | 1 |
| TBA2_HUMAN (Q13748) Tubulin alpha-2 chain<br>(Alpha-tubulin 2) [MASS=49959]                                                       | 1.00 | 4.89  | 0.13 | 0.00 | 1  | 2 |  | 2 | YM[147]AC[330]C[330]MLYR                  | 1 |
|                                                                                                                                   |      |       |      |      |    |   |  | 2 | TIQFVDWC[330]PTGFK                        | 2 |
|                                                                                                                                   |      |       |      |      |    |   |  | 2 | TIQFVDWC[339]PTGFK                        | 3 |
| TBA3_HUMAN (Q71U36) Tubulin alpha-3<br>chain (Alpha-tubulin 3) (Tubulin B-alpha-1)<br>[MASS=50135]                                | 1.00 | 7.10  | 1.14 | 0.07 | 11 | 1 |  | 3 | LADQC[330]TGLQGFLVFHSGGGTSGGFTSLLMER      | 2 |
|                                                                                                                                   |      |       |      |      |    |   |  | 2 | LADQC[339]TGLQGFLVFHSGGGTSGGFTSLLM[147]ER | 1 |
|                                                                                                                                   |      |       |      |      |    |   |  | 3 | LADQC[339]TGLQGFLVFHSGGGTSGGFTSLLMER      | 2 |
|                                                                                                                                   |      |       |      |      |    |   |  | 3 | LADQC[330]TGLQGFLVFHSGGGTSGGFTSLLM[147]ER | 1 |

|                                                                                |      |       |      |      |    |  |   |   |                                                  |   |
|--------------------------------------------------------------------------------|------|-------|------|------|----|--|---|---|--------------------------------------------------|---|
|                                                                                |      |       |      |      |    |  |   | 3 | LTTPTYGDLNHLVSATM[147]SGVTTC[330]LR              | 1 |
|                                                                                |      |       |      |      |    |  |   | 1 | NMM[147]AAC[339]DPR                              | 1 |
|                                                                                |      |       |      |      |    |  |   | 2 | NM[147]MAAC[330]DPR                              | 1 |
|                                                                                |      |       |      |      |    |  |   | 3 | EAESC[339]DC[339]LQGFQLTHSLGGGTGSGMGTLLISK       | 1 |
|                                                                                |      |       |      |      |    |  |   | 3 | M[147]SATFIGNSTAIQELFK                           | 1 |
|                                                                                |      |       |      |      |    |  |   | 3 | KEAESC[339]DC[339]LQGFQLTHSLGGGTGSGMGTLLISK      | 1 |
|                                                                                |      |       |      |      |    |  |   | 2 | LTTPTYGDLNHLVSATM[147]SGVTTC[339]LR              | 2 |
|                                                                                |      |       |      |      |    |  |   | 1 | TAVC[330]DIPPR                                   | 1 |
|                                                                                |      |       |      |      |    |  |   | 2 | LTTPTYGDLNHLVSATM[147]SGVTTC[330]LR              | 2 |
|                                                                                |      |       |      |      |    |  |   | 2 | NM[147]M[147]AAC[330]DPR                         | 2 |
| TBB2C_HUMAN (P68371) Tubulin beta-2C chain (Tubulin beta-2 chain) [MASS=49831] | 0.00 | 28.09 | *    | *    | *  |  | 6 | 3 | LTTPTYGDLNHLVSATMSGVTTC[339]LR                   | 1 |
|                                                                                |      |       |      |      |    |  |   | 3 | EAESC[330]DC[330]LQGFQLTHSLGGGTGSGM[147]GTLLISK  | 1 |
|                                                                                |      |       |      |      |    |  |   | 2 | TAVC[330]DIPPR                                   | 3 |
|                                                                                |      |       |      |      |    |  |   | 2 | LTTPTYGDLNHLVSATMSGVTTC[339]LR                   | 1 |
|                                                                                |      |       |      |      |    |  |   | 2 | TAVC[339]DIPPR                                   | 4 |
|                                                                                |      |       |      |      |    |  |   | 2 | NM[147]M[147]AAC[339]DPR                         | 1 |
|                                                                                |      |       |      |      |    |  |   | 3 | EAESC[339]DC[339]LQGFQLTHSLGGGTGSGM[147]GTLLISK  | 1 |
|                                                                                |      |       |      |      |    |  |   | 1 | TAVC[339]DIPPR                                   | 2 |
|                                                                                |      |       |      |      |    |  |   | 3 | KEAESC[330]DC[330]LQGFQLTHSLGGGTGSGM[147]GTLLISK | 1 |
|                                                                                |      |       |      |      |    |  |   | 3 | KEAESC[339]DC[339]LQGFQLTHSLGGGTGSGM[147]GTLLISK | 1 |
|                                                                                |      |       |      |      |    |  |   | 2 | EIVHIQAGQC[339]GNQIGAK                           | 2 |
|                                                                                |      |       |      |      |    |  |   | 2 | EIVHIQAGQC[330]GNQIGAK                           | 1 |
|                                                                                |      |       |      |      |    |  |   | 3 | M[147]REIVHIQAGQC[339]GNQIGAK                    | 1 |
|                                                                                |      |       |      |      |    |  |   | 1 | EIVHIQAGQC[330]GNQIGAK                           | 1 |
| TBB2_HUMAN (P07437) Tubulin beta-2 chain [MASS=49671]                          | 1.00 | 11.49 | 0.90 | 0.56 | 36 |  | 3 | 3 | MREIVHIQAGQC[330]GNQIGAK                         | 1 |
|                                                                                |      |       |      |      |    |  |   | 2 | ALTVPELTQQVFDK                                   | 1 |
|                                                                                |      |       |      |      |    |  |   | 3 | MREIVHIQAGQC[339]GNQIGAK                         | 1 |
|                                                                                |      |       |      |      |    |  |   | 3 | M[147]REIVHIQAGQC[330]GNQIGAK                    | 2 |
|                                                                                |      |       |      |      |    |  |   | 2 | MREIVHIQAGQC[339]GNQIGAK                         | 1 |
|                                                                                |      |       |      |      |    |  |   | 2 | M[147]REIVHIQAGQC[330]GNQIGAK                    | 1 |

|                                                                                                                                                                                          |      |      |      |      |   |   |   |                                   |   |
|------------------------------------------------------------------------------------------------------------------------------------------------------------------------------------------|------|------|------|------|---|---|---|-----------------------------------|---|
| TBB3_HUMAN (Q13509) Tubulin beta-3 chain (Tubulin beta-III) (Tubulin beta-4) [MASS=50432]                                                                                                | 0.00 | 7.11 | *    | *    | * | 2 | 2 | ISVYYNEASSHK                      | 1 |
|                                                                                                                                                                                          |      |      |      |      |   |   | 3 | VREEYPDRIMNTFSVVPSPK              | 1 |
| TBB6_HUMAN (Q9BUF5) Tubulin beta-6 chain [MASS=49857]                                                                                                                                    | 0.00 | 9.87 | *    | *    | * | 2 | 3 | IREEFDPDRIMNTFSVM[147]JPSPK       | 1 |
|                                                                                                                                                                                          |      |      |      |      |   |   | 3 | AALVDLEPGTM[147]DSVRSRGPFGQLFR    | 1 |
| TBCC_HUMAN (Q15814) Tubulin-specific chaperone C (Tubulin-folding cofactor C) (CFC) [MASS=39220]                                                                                         | 0.00 | 5.78 | 0.26 | 0.00 | 1 | 1 | 3 | ASELHQRDVLLTELSNC[330]TVR         | 1 |
| TBX22_HUMAN (Q9Y458) T-box transcription factor TBX22 (T-box protein 22) [MASS=57910]                                                                                                    | 0.31 | 2.69 | 1.29 | 0.00 | 1 | 1 | 2 | C[330]NHVHWYPAINHYL               | 1 |
| TCPZ_HUMAN (P40227) T-complex protein 1 subunit zeta (TCP-1-zeta) (CCT-zeta) (CCT-zeta-1) (Tcp20) (HTR3) (Acute morphine dependence-related protein 2) [MASS=57893]                      | *    | 3.21 | *    | *    | * | 1 | 2 | GTMKM[147]LVSGAGDIKLTK            | 1 |
| TENR_HUMAN (Q92752) Tenascin-R precursor (TN-R) (Restrictin) (Janusin) [MASS=149547]                                                                                                     | *    | 0.52 | *    | *    | * | 1 | 1 | FSVEDSR                           | 2 |
| TERA_HUMAN (P55072) Transitional endoplasmic reticulum ATPase (TER ATPase) (15S Mg(2+)-ATPase p97 subunit) (Valosin-containing protein) (VCP) [MASS=89190]                               | *    | 2.48 | *    | *    | * | 2 | 2 | IRM[147]NRVVR                     | 1 |
|                                                                                                                                                                                          |      |      |      |      |   |   | 2 | RDHFEEAMRFAR                      | 1 |
| TEX15_HUMAN (Q9BXT5) Testis-expressed sequence 15 protein [MASS=315360]                                                                                                                  | 0.00 | 1.76 | 0.71 | 0.00 | 1 | 4 | 1 | MAHIR                             | 1 |
|                                                                                                                                                                                          |      |      |      |      |   |   | 2 | HIKSVLNILSDEASLC[330]K            | 1 |
|                                                                                                                                                                                          |      |      |      |      |   |   | 3 | PGILGVNHTPILPAHSETC[330]K         | 1 |
|                                                                                                                                                                                          |      |      |      |      |   |   | 1 | TTGSHPK                           | 1 |
| TF3C4_HUMAN (Q9UKN8) General transcription factor 3C polypeptide 4 (EC 2.3.1.48) (Transcription factor IIIc subunit delta) (TF3C-delta) (TFIIIC 90 kDa subunit) (TFIIIC 90) [MASS=92001] | 0.00 | 5.60 | 1.27 | 0.00 | 1 | 3 | 3 | QNGTVYTC[339]SSDGK                | 1 |
|                                                                                                                                                                                          |      |      |      |      |   |   | 2 | C[339]VPLYHPYQK                   | 1 |
|                                                                                                                                                                                          |      |      |      |      |   |   | 3 | PC[330]GAYLAIITTEGM[147]INGLHPVNK | 1 |
| TFP11_HUMAN (Q9UBB9) Tuftelin-interacting protein 11 [MASS=96819]                                                                                                                        | *    | 3.35 | *    | *    | * | 2 | 1 | GFAGGTK                           | 1 |
|                                                                                                                                                                                          |      |      |      |      |   |   | 3 | PSQKGFAGGTKSFMDFGSWER             | 1 |
| THIK_HUMAN (P09110) 3-ketoacyl-CoA thiolase, peroxisomal precursor (EC 2.3.1.16) (Beta-ketothiolase) (Acetyl-CoA acyltransferase) (Peroxisomal 3-oxoacyl-CoA thiolase) [MASS=44292]      | 0.99 | 4.72 | 0.93 | 0.00 | 1 | 1 | 2 | VNPLGGAVALGHPLGC[339]TGAR         | 1 |



|                                                                                                                                                                                    |      |       |      |      |   |   |                                                           |                   |   |
|------------------------------------------------------------------------------------------------------------------------------------------------------------------------------------|------|-------|------|------|---|---|-----------------------------------------------------------|-------------------|---|
| THIL_HUMAN (P24752) Acetyl-CoA acetyltransferase, mitochondrial precursor (EC 2.3.1.9) (Acetoacetyl-CoA thiolase) (T2) [MASS=45199]                                                | 0.00 | 2.81  | 3.78 | 0.00 | 1 | 1 | 2                                                         | IHMGSC[339]AENTAK | 1 |
| THIM_HUMAN (P42765) 3-ketoacyl-CoA thiolase, mitochondrial (EC 2.3.1.16) (Beta-ketothiolase) (Acetyl-CoA acyltransferase) (Mitochondrial 3-oxoacyl-CoA thiolase) (T1) [MASS=41924] | 0.22 | 9.57  | 0.76 | 0.00 | 1 | 3 | 2 HVGLRVGIPKETPALTINR<br>1 LPPVFK<br>2 EEC[339]DKYALQSQQR | 1<br>1<br>1       |   |
| THIO_HUMAN (P10599) Thioredoxin (ATL-derived factor) (ADF) (Surface-associated sulphhydryl protein) (SASP) [MASS=11606]                                                            | 1.00 | 8.65  | 0.86 | 0.01 | 2 | 1 | 2 C[330]M[147]PTFQFFK<br>2 C[339]M[147]PTFQFFK            | 1<br>1            |   |
| THY1_HUMAN (P04216) Thy-1 membrane glycoprotein precursor (Thy-1 antigen) (CD90 antigen) (CDw90 antigen) [MASS=17935]                                                              | 0.89 | 8.70  | 0.58 | 0.00 | 1 | 1 | 2 VTSLTAC[330]LVDQSLR                                     | 1                 |   |
| THYG_HUMAN (P01266) Thyroglobulin precursor [MASS=304731]                                                                                                                          | *    | 0.90  | *    | *    | * | 2 | 2 RFLAVQSVISGRFR<br>3 RVSPGYVPAC[339]R<br>1 TDTAFK        | 1<br>1<br>1       |   |
| TIAM1_HUMAN (Q13009) T-lymphoma invasion and metastasis-inducing protein 1 (TIAM-1 protein) [MASS=177637]                                                                          | *    | 2.33  | *    | *    | * | 3 | 2 LC[339]ALKGARPAMSR<br>3 QHSYTSNGPTFM[147]ETASFK         | 1<br>1<br>2       |   |
| TIF1G_HUMAN (Q9UPN9) Transcription intermediary factor 1-gamma (TIF1-gamma) (Tripartite motif-containing protein 33) (RET-fused gene 7 protein) (Rfg7 protein) [MASS=122520]       | *    | 0.53  | *    | *    | * | 1 | 1 TSLSFK                                                  | 1                 |   |
| TIM9_HUMAN (Q9Y5J7) Mitochondrial import inner membrane translocase subunit Tim9 [MASS=10378]                                                                                      | 0.00 | 17.98 | 0.44 | 0.00 | 1 | 1 | 3 EVKPEETTC[339]SEHC[339]LQK                              | 1                 |   |
| TINAG_HUMAN (Q9UJW2) Tubulointerstitial nephritis antigen (TIN-Ag) [MASS=54646]                                                                                                    | *    | 2.52  | *    | *    | * | 1 | 2 EKFWIAANFWGK                                            | 1                 |   |
| TLR5_HUMAN (O60602) Toll-like receptor 5 precursor (Toll/interleukin-1 receptor-like protein 3) [MASS=97725]                                                                       | 0.00 | 1.86  | 1.72 | 0.00 | 1 | 1 | 3 FC[339]NLTQVPQVLNITTER                                  | 1                 |   |
| TNR19_HUMAN (Q9NS68) Tumor necrosis factor receptor superfamily member 19 precursor (Toxicity and JNK inducer) (TRADE) [MASS=46015]                                                | 0.00 | 5.44  | 1.67 | 0.00 | 1 | 1 | 3 ANC[330]SATSDAIC[330]GDC[330]LPGFYRKTG                  | 1                 |   |

|                                                                                                                                                                 |      |       |      |      |   |   |   |                                        |   |
|-----------------------------------------------------------------------------------------------------------------------------------------------------------------|------|-------|------|------|---|---|---|----------------------------------------|---|
| TOM70_HUMAN (O94826) Mitochondrial precursor proteins import receptor (Translocase of outer membrane TOM70) [MASS=67454]                                        | 1.00 | 10.20 | 1.29 | 0.02 | 3 | 4 | 3 | ADEM[147]YDKC[339]IDLEPDNATTYVHK       | 1 |
|                                                                                                                                                                 |      |       |      |      |   |   | 3 | C[339]IDLEPDNATTYVHK                   | 1 |
|                                                                                                                                                                 |      |       |      |      |   |   | 1 | RNSER                                  | 1 |
|                                                                                                                                                                 |      |       |      |      |   |   | 2 | C[339]AEGYALYAQALTDQQQFGK              | 1 |
| TPIS_HUMAN (P60174) Triosephosphate isomerase (EC 5.3.1.1) (TIM) (Triose-phosphate isomerase) [MASS=26538]                                                      | 1.00 | 7.26  | 0.77 | 0.00 | 1 | 1 | 2 | VAHALAEGLGVIAC[330]IGEK                | 1 |
| TR19L_HUMAN (Q969Z4) Tumor necrosis factor receptor superfamily member 19L precursor (Receptor expressed in lymphoid tissues) [MASS=46092]                      | *    | 3.26  | *    | *    | * | 2 | 1 | VPKAGAK                                | 1 |
|                                                                                                                                                                 |      |       |      |      |   |   | 1 | QPGNGTR                                | 1 |
|                                                                                                                                                                 |      |       |      |      |   |   | 2 | LLGKTDVQR                              | 9 |
| TR4_HUMAN (P49116) Orphan nuclear receptor TR4 (Orphan nuclear receptor TAK1) [MASS=65414]                                                                      | *    | 4.03  | *    | *    | * | 2 |   |                                        |   |
|                                                                                                                                                                 |      |       |      |      |   |   | 2 | PSNC[339]AASTEKIYIRK                   | 1 |
| TRAK2_HUMAN (O60296) Trafficking kinesin-binding protein 2 (Amyotrophic lateral sclerosis 2 chromosomal region candidate gene 3 protein) [MASS=101418]          | 0.00 | 2.41  | 0.88 | 0.00 | 1 | 1 | 3 | RNQSLPVIMGSFAAPVC[330]TSSPK            | 1 |
| TRI17_HUMAN (Q9Y577) Tripartite motif-containing protein 17 (Testis RING finger protein) (RING finger protein 16) [MASS=54418]                                  | 0.00 | 6.08  | 1.82 | 0.00 | 1 | 2 | 3 | QDLC[339]QEHHEPLK                      | 1 |
|                                                                                                                                                                 |      |       |      |      |   |   | 3 | RYLGSSPEGSGFC[339]SKDR                 | 1 |
| TRI50_HUMAN (Q86XT4) Tripartite motif-containing protein 50 [MASS=54774]                                                                                        | *    | 5.34  | *    | *    | * | 2 | 2 | VLPAPEPLK                              | 1 |
|                                                                                                                                                                 |      |       |      |      |   |   | 2 | GLVASLDM[147]QLEQAQGTR                 | 1 |
| TRIM3_HUMAN (O75382) Tripartite motif-containing protein 3 (RING finger protein 22) (Brain-expressed RING finger protein) (RING finger protein 97) [MASS=80836] | *    | 2.28  | *    | *    | * | 1 | 2 | MAKREDSPGPEVQPMDDK                     | 1 |
| TRIO_HUMAN (O75962) Triple functional domain protein (PTPRF-interacting protein) [MASS=341614]                                                                  | *    | 1.22  | *    | *    | * | 3 | 2 | VQDLLEFLHEK                            | 1 |
|                                                                                                                                                                 |      |       |      |      |   |   | 2 | STLLDMSSIFHQKAEK                       | 1 |
|                                                                                                                                                                 |      |       |      |      |   |   | 2 | EGLSNKVSVK                             | 1 |
| TRPC5_HUMAN (Q9UL62) Short transient receptor potential channel 5 (TrpC5) (Htrp-5) (Htrp5) [MASS=111411]                                                        | *    | 2.88  | *    | *    | * | 1 | 3 | HWWVKLLTC[330]M[147]TIGFLFPMLSIAYLISPR | 1 |

|                                                                                                                                                                                                 |      |      |      |      |   |   |        |                                                               |        |
|-------------------------------------------------------------------------------------------------------------------------------------------------------------------------------------------------|------|------|------|------|---|---|--------|---------------------------------------------------------------|--------|
| TRPM3_HUMAN (Q9HCF6) Transient receptor potential cation channel subfamily M member 3 (Long transient receptor potential channel 3) (LTrpC3) (Melastatin-2) (MLSN2) [MASS=197529]               | *    | 1.04 | *    | *    | * | 1 | 3      | PTKEKEEEDM[147]ELTAM[147]LGR                                  | 1      |
| TRPS1_HUMAN (Q9UHF7) Zinc finger transcription factor Trps1 (Zinc finger protein GC79) (Tricho-rhino-phalangeal syndrome type I protein) [MASS=141520]                                          | 0.00 | 3.51 | 1.71 | 0.00 | 1 | 2 | 3<br>3 | HYQQLHNIHKC[339]TIKHC[339]PFC[339]PR<br>SKTDLLVNDNPDPAPELQDFK | 1<br>2 |
|                                                                                                                                                                                                 |      |      |      |      |   |   | 3<br>1 | M[147]LEVFVLKFHTIARYQLSAIFK<br>NNSLHDM[147]K                  | 1<br>6 |
| TRRAP_HUMAN (Q9Y4A5) Transformation/transcription domain-associated protein (350/400 kDa PCAF-associated factor) (PAF350/400) (STAF40) (Tra1 homolog) [MASS=437584]                             | *    | 1.61 | *    | *    | * | 4 |        |                                                               |        |
|                                                                                                                                                                                                 |      |      |      |      |   |   | 3<br>3 | TLRNPADSISHVAYR<br>SDPGPIRATAPM[147]WRC[330]SR                | 1<br>1 |
| TRXR2_HUMAN (Q9NNW7) Thioredoxin reductase 2, mitochondrial precursor (EC 1.8.1.9) (TR3) (TR-beta) (Selenoprotein Z) (SeiZ) [MASS=56459]                                                        | 0.00 | 2.67 | 1.23 | 0.00 | 1 | 1 | 2      | TVGIHPTC[339]SEEVVK                                           | 1      |
| TRYB1_HUMAN (Q15661) Tryptase beta-1 precursor (EC 3.4.21.59) (Tryptase-1) (Tryptase I) [MASS=30515]                                                                                            | *    | 2.91 | *    | *    | * | 1 | 1      | LPPPFPLK                                                      | 1      |
| TSH2_HUMAN (Q9NRE2) Teashirt homolog 2 (Zinc finger protein 218) (Ovarian cancer-related protein 10-2) (OVC10-2) [MASS=115004]                                                                  | *    | 4.16 | *    | *    | * | 2 | 2<br>2 | VM[147]PLVSMPTHLAPYTQVKKESDK<br>PC[339]SPDSTTGFSFADSFSSQK     | 1<br>1 |
| UBP1_HUMAN (O94782) Ubiquitin carboxyl-terminal hydrolase 1 (EC 3.1.2.15) (Ubiquitin thioesterase 1) (Ubiquitin-specific-processing protease 1) (Deubiquitinating enzyme 1) (hUBP) [MASS=88207] | 0.00 | 3.57 | 1.96 | 0.00 | 1 | 1 | 3      | MPEVITIHLKC[339]FAASGLEFDC[339]YGGGLSK                        | 1      |
| UBP28_HUMAN (Q96RU2) Ubiquitin carboxyl-terminal hydrolase 28 (EC 3.1.2.15) (Ubiquitin thioesterase 28) (Ubiquitin-specific-processing protease 28) (Deubiquitinating enzyme 28) [MASS=122490]  | *    | 1.21 | *    | *    | * | 1 | 3      | EIGPDDMNM[147]EEYK                                            | 1      |

|                                                                                                                                                                                                                                            |      |       |      |      |   |   |   |                                       |   |
|--------------------------------------------------------------------------------------------------------------------------------------------------------------------------------------------------------------------------------------------|------|-------|------|------|---|---|---|---------------------------------------|---|
| UBP33_HUMAN (Q8TEY7) Ubiquitin carboxyl-terminal hydrolase 33 (EC 3.1.2.15) (Ubiquitin thioesterase 33) (Ubiquitin-specific-processing protease 33) (Deubiquitinating enzyme 33) (VHL-interacting deubiquitinating enzyme 1) [MASS=106752] | *    | 0.96  | *    | *    | * | 1 | 2 | VNSEGEFDK                             | 1 |
| UBP38_HUMAN (Q8NB14) Ubiquitin carboxyl-terminal hydrolase 38 (EC 3.1.2.15) (Ubiquitin thioesterase 38) (Ubiquitin-specific-processing protease 38) (Deubiquitinating enzyme 38) (HP43.8KD) [MASS=116545]                                  | 0.00 | 2.59  | 1.28 | 0.00 | 1 | 1 | 3 | TGLINLGNTC[339]YM[147]NSVIQALFMATDFRR | 1 |
| UCHL1_HUMAN (P09936) Ubiquitin carboxyl-terminal hydrolase isozyme L1 (EC 3.4.19.12) (EC 6.-.-.-) (UCH-L1) (Ubiquitin thioesterase L1) (Neuron cytoplasmic protein 9.5) (PGP 9.5) (PGP9.5) [MASS=24824]                                    | 0.97 | 8.07  | 1.04 | 0.00 | 1 | 1 | 3 | NEAIQAAHDAVAQEGQC[330]R               | 1 |
| UCRH_HUMAN (P07919) Ubiquinol-cytochrome c reductase complex 11 kDa protein, mitochondrial precursor (EC 1.10.2.2) (Mitochondrial hinge protein) (Cytochrome C1, nonheme 11 kDa protein) (Complex III subunit VIII) [MASS=10739]           | 1.00 | 45.05 | 1.18 | 0.05 | 6 | 4 | 2 | LELC[339]DER                          | 1 |
|                                                                                                                                                                                                                                            |      |       |      |      |   |   | 2 | SHTEEDC[339]TEELFDLHAR                | 1 |
|                                                                                                                                                                                                                                            |      |       |      |      |   |   | 3 | SHTEEDC[339]TEELFDLHAR                | 1 |
|                                                                                                                                                                                                                                            |      |       |      |      |   |   | 1 | DHC[339]VAHK                          | 1 |
|                                                                                                                                                                                                                                            |      |       |      |      |   |   | 2 | ERLELC[330]DER                        | 1 |
|                                                                                                                                                                                                                                            |      |       |      |      |   |   | 2 | ERLELC[339]DER                        | 1 |
| UHMK1_HUMAN (Q8TAS1) Serine/threonine-protein kinase Kist (EC 2.7.11.1) (Kinase interacting with stathmin) (U2AF homology motif kinase 1) [MASS=46546]                                                                                     | *    | 2.15  | *    | *    | * | 1 | 1 | LIDFGLSFK                             | 2 |
| ULK2_HUMAN (Q8IYT8) Serine/threonine-protein kinase ULK2 (EC 2.7.11.1) (Unc-51-like kinase 2) [MASS=112726]                                                                                                                                | *    | 0.87  | *    | *    | * | 1 | 1 | GTLSSEDIR                             | 1 |
| UNC5C_HUMAN (O95185) Netrin receptor UNC5C precursor (Unc-5 homolog C) (Unc-5 homolog 3) [MASS=103101]                                                                                                                                     | 0.00 | 2.79  | 0.32 | 0.00 | 1 | 1 | 3 | NQAAQGQWEDVVVGEENFTTPC[330]YIK        | 1 |

|                                                                                                                                                                                                                                   |      |       |      |      |   |   |   |                                            |   |
|-----------------------------------------------------------------------------------------------------------------------------------------------------------------------------------------------------------------------------------|------|-------|------|------|---|---|---|--------------------------------------------|---|
| UQCR1_HUMAN (P31930) Ubiquinol-cytochrome-c reductase complex core protein I, mitochondrial precursor (EC 1.10.2.2) [MASS=52645]                                                                                                  | 1.00 | 16.67 | 0.91 | 0.16 | 6 | 4 | 2 | NALVSHLDGTTTPVC[339]EDIGR                  | 2 |
|                                                                                                                                                                                                                                   |      |       |      |      |   |   | 1 | LC[330]TSATESEVAR                          | 1 |
|                                                                                                                                                                                                                                   |      |       |      |      |   |   | 3 | LC[339]QSFQTFASIC[339]YAETGLLGAHFVC[339]DR | 1 |
|                                                                                                                                                                                                                                   |      |       |      |      |   |   | 3 | YIYDQC[339]PAVAGYGPIEQLPDYNR               | 1 |
|                                                                                                                                                                                                                                   |      |       |      |      |   |   | 2 | LC[330]TSATESEVAR                          | 1 |
| UQCR2_HUMAN (P22695) Ubiquinol-cytochrome-c reductase complex core protein 2, mitochondrial precursor (EC 1.10.2.2) (Complex III subunit II) [MASS=48443]                                                                         | 1.00 | 2.87  | 0.86 | 0.07 | 2 | 1 | 2 | NALANPLYC[339]PDYR                         | 2 |
| VA0D_HUMAN (P61421) Vacuolar ATP synthase subunit d (EC 3.6.3.14) (V-ATPase d subunit) (Vacuolar proton pump d subunit) (V-ATPase AC39 subunit) (V-ATPase 40 kDa accessory protein) (P39) (32 kDa accessory protein) [MASS=40329] | 0.00 | 7.69  | *    | *    | * | 1 | 3 | LHLQSTDYGNFLANEASPLTVSVIDDR                | 1 |
| VATA1_HUMAN (P38606) Vacuolar ATP synthase catalytic subunit A, ubiquitous isoform (EC 3.6.3.14) (V-ATPase subunit A 1) (Vacuolar proton pump alpha subunit 1) (V-ATPase 69 kDa subunit 1) (Isoform VA68) [MASS=68304]            | *    | 4.21  | *    | *    | * | 1 | 3 | DMGYHVSMMDSTSRWAEALREISGR                  | 1 |
| VATB1_HUMAN (P15313) Vacuolar ATP synthase subunit B, kidney isoform (EC 3.6.3.14) (V-ATPase B1 subunit) (Vacuolar proton pump B isoform 1) (Endomembrane proton pump 58 kDa subunit) [MASS=56980]                                | 1.00 | 6.82  | 1.03 | 0.04 | 3 | 2 | 3 | IPIFSAAGLPHNEIAAQIC[339]R                  | 1 |
|                                                                                                                                                                                                                                   |      |       |      |      |   |   | 3 | IPIFSAAGLPHNEIAAQIC[330]R                  | 1 |
|                                                                                                                                                                                                                                   |      |       |      |      |   |   | 2 | IPIFSAAGLPHNEIAAQIC[330]R                  | 1 |
|                                                                                                                                                                                                                                   |      |       |      |      |   |   | 3 | PGGLPGSSC[339]NLGAAR                       | 1 |
| VATB2_HUMAN (P21281) Vacuolar ATP synthase subunit B, brain isoform (EC 3.6.3.14) (V-ATPase B2 subunit) (Vacuolar proton pump B isoform 2) (Endomembrane proton pump 58 kDa subunit) (HO57) [MASS=56500]                          | 1.00 | 13.31 | *    | *    | * | 3 | 3 | EMLKRIPQSTLSEFYPR                          | 1 |
|                                                                                                                                                                                                                                   |      |       |      |      |   |   | 3 | AM[147]RGIVNGAAPELPVPTGGPAVGAR             | 1 |
|                                                                                                                                                                                                                                   |      |       |      |      |   |   | 3 | PIDRGPVLAEDFLDIM[147]GQPINPQC[339]R        | 1 |
| VAV2_HUMAN (P52735) Protein vav-2 [MASS=101256]                                                                                                                                                                                   | 0.00 | 4.78  | 0.34 | 0.00 | 1 | 2 | 2 | EALEAMQDLAMYINEVKRDK                       | 1 |
|                                                                                                                                                                                                                                   |      |       |      |      |   |   | 3 | MWSYGFYLIHLQKGQGFQFFC[330]K                | 1 |
| VAX1_HUMAN (Q5SQQ9) Ventral anterior homeobox 1 [MASS=34713]                                                                                                                                                                      | 0.00 | 8.98  | 1.40 | 0.00 | 1 | 1 | 3 | LLEQGRLLSPPGLPALLPPC[339]ATGALGSALR        | 1 |

|                                                                                                                                                                                                                                                                             |      |       |      |      |   |   |  |   |                                            |   |
|-----------------------------------------------------------------------------------------------------------------------------------------------------------------------------------------------------------------------------------------------------------------------------|------|-------|------|------|---|---|--|---|--------------------------------------------|---|
|                                                                                                                                                                                                                                                                             |      |       |      |      |   |   |  | 2 | YQIDPDAC[339]FSAK                          | 2 |
| VDAC1_HUMAN (P21796) Voltage-dependent anion-selective channel protein 1 (VDAC-1) (hVDAC1) (Outer mitochondrial membrane protein porin 1) (Plasmalemmal porin) (Porin 31HL) (Porin 31HM) [MASS=30641]                                                                       | 1.00 | 18.09 | 1.09 | 0.06 | 9 | 3 |  | 2 | EHINLGC[330]DM[147]DFDIAGPSIR              | 1 |
|                                                                                                                                                                                                                                                                             |      |       |      |      |   |   |  | 3 | REHINLGC[330]DMDFDIAGPSIR                  | 1 |
|                                                                                                                                                                                                                                                                             |      |       |      |      |   |   |  | 1 | YQIDPDAC[339]FSAK                          | 1 |
|                                                                                                                                                                                                                                                                             |      |       |      |      |   |   |  | 1 | YQIDPDAC[330]FSAK                          | 1 |
|                                                                                                                                                                                                                                                                             |      |       |      |      |   |   |  | 2 | EHINLGC[339]DMDFDIAGPSIR                   | 1 |
|                                                                                                                                                                                                                                                                             |      |       |      |      |   |   |  | 3 | EHINLGC[330]DM[147]DFDIAGPSIR              | 1 |
|                                                                                                                                                                                                                                                                             |      |       |      |      |   |   |  | 3 | EHINLGC[339]DM[147]DFDIAGPSIR              | 1 |
| VDAC2_HUMAN (P45880) Voltage-dependent anion-selective channel protein 2 (VDAC-2) (hVDAC2) (Outer mitochondrial membrane protein porin 2) [MASS=38092]                                                                                                                      | 1.00 | 26.51 | 1.68 | 0.07 | 6 | 5 |  | 2 | YKWC[339]EYGLTFTEK                         | 1 |
|                                                                                                                                                                                                                                                                             |      |       |      |      |   |   |  | 2 | WNTDNTLGTEIAIEDQIC[339]QGLK                | 1 |
|                                                                                                                                                                                                                                                                             |      |       |      |      |   |   |  | 1 | WC[330]EYGLTFTEK                           | 1 |
|                                                                                                                                                                                                                                                                             |      |       |      |      |   |   |  | 3 | SC[339]SGVEFSTSGSSNTDTGKVTGTLETG           | 1 |
|                                                                                                                                                                                                                                                                             |      |       |      |      |   |   |  | 2 | SC[339]SGVEFSTSGSSNTDTGK                   | 1 |
|                                                                                                                                                                                                                                                                             |      |       |      |      |   |   |  | 2 | WC[339]EYGLTFTEK                           | 1 |
| VDAC3_HUMAN (Q9Y277) Voltage-dependent anion-selective channel protein 3 (VDAC-3) (hVDAC3) (Outer mitochondrial membrane protein porin 3) [MASS=30658]                                                                                                                      | 0.98 | 3.89  | 1.09 | 0.03 | 2 | 1 |  | 2 | VC[330]NYGLTFTQK                           | 2 |
| VN1R4_HUMAN (Q7Z5H5) Vomeronasal type-1 receptor 4 (V1r-like receptor 4) (hGPCR27) [MASS=33557]                                                                                                                                                                             | 0.00 | 7.31  | 0.16 | 0.00 | 1 | 1 |  | 2 | GVSIGTTC[330]LLSVFQVITVSSRK                | 1 |
| VPP1_HUMAN (Q93050) Vacuolar proton translocating ATPase 116 kDa subunit a isoform 1 (V-ATPase 116 kDa isoform a1) (Clathrin-coated vesicle/synaptic vesicle proton pump 116 kDa subunit) (Vacuolar proton pump subunit 1) (Vacuolar adenosine triphosphatase) [MASS=96412] | 0.96 | 3.35  | 1.04 | 0.00 | 1 | 1 |  | 3 | SEEM[147]TLAQLFLQSEAYC[339]C[339]VSELGELGK | 1 |
| VWF_HUMAN (P04275) Von Willebrand factor precursor (vWF) [Contains: Von Willebrand antigen II] [MASS=309298]                                                                                                                                                                | *    | 0.18  | *    | *    | * | 1 |  | 1 | PSELR                                      | 1 |
| WAPL_HUMAN (Q7Z5K2) Wings apart-like protein homolog (Friend of EBNA2 protein) [MASS=132945]                                                                                                                                                                                | *    | 0.92  | *    | *    | * | 1 |  | 2 | C[330]AMPSFRMHLR                           | 1 |
| WDR19_HUMAN (Q8NEZ3) WD repeat protein 19 [MASS=151580]                                                                                                                                                                                                                     | 0.00 | 2.61  | 0.83 | 0.00 | 1 | 3 |  | 2 | VYTYVFHK                                   | 1 |
|                                                                                                                                                                                                                                                                             |      |       |      |      |   |   |  | 1 | PEYRSK                                     | 1 |
|                                                                                                                                                                                                                                                                             |      |       |      |      |   |   |  | 3 | EHDEAC[330]LAGVAQMSIRMGDIR                 | 1 |
| WN10A_HUMAN (Q9GZT5) Protein Wnt-10a precursor [MASS=46444]                                                                                                                                                                                                                 | 0.30 | 8.87  | 5.36 | 0.00 | 1 | 2 |  | 2 | ESAFAYAIAAAGVVHAVSNAC[339]ALGK             | 1 |
|                                                                                                                                                                                                                                                                             |      |       |      |      |   |   |  | 3 | PWLRLRPQPQPR                               | 1 |

|                                                                                                                                                                                      |      |      |      |      |   |   |   |                                              |   |
|--------------------------------------------------------------------------------------------------------------------------------------------------------------------------------------|------|------|------|------|---|---|---|----------------------------------------------|---|
| WWP1_HUMAN (Q9H0M0) NEDD4-like E3 ubiquitin-protein ligase WWP1 (EC 6.3.2.-) (WW domain-containing protein 1) (Atropin-1-interacting protein 5) (AIP5) [MASS=105201]                 | *    | 2.17 | *    | *    | * | 1 | 3 | VTSHDLKLGGSNILVTEENK                         | 1 |
| XDH_HUMAN (P47989) Xanthine dehydrogenase/oxidase [Includes: Xanthine dehydrogenase (EC 1.17.1.4) (XD); Xanthine oxidase (EC 1.17.3.2) (XO) (Xanthine oxidoreductase)] [MASS=146292] | 0.00 | 3.90 | 0.57 | 0.00 | 1 | 3 | 2 | TLVDAVAKLPAQKTEVFR                           | 1 |
|                                                                                                                                                                                      |      |      |      |      |   |   | 3 | LGLSGTKLGC[330]GEGGC[330]GAC[330]TVM[147]LSK | 1 |
|                                                                                                                                                                                      |      |      |      |      |   |   | 3 | KRGLC[339]IIPTK                              | 1 |
| YLPM1_HUMAN (P49750) YLP motif-containing protein 1 (Nuclear protein ZAP3) (ZAP113) [MASS=219984]                                                                                    | *    | 2.10 | *    | *    | * | 5 | 1 | DEPPR                                        | 1 |
|                                                                                                                                                                                      |      |      |      |      |   |   | 2 | EM[147]ERDM[147]DRDVDR                       | 1 |
|                                                                                                                                                                                      |      |      |      |      |   |   | 1 | KGPVVAK                                      | 1 |
|                                                                                                                                                                                      |      |      |      |      |   |   | 1 | MEDTR                                        | 1 |
|                                                                                                                                                                                      |      |      |      |      |   |   | 2 | SLDNEWDRDYGR                                 | 1 |
| ZBT17_HUMAN (Q13105) Zinc finger and BTB domain-containing protein 17 (Zinc finger protein 151) (Myc-interacting zinc finger protein) (Miz-1 protein) [MASS=87927]                   | *    | 1.99 | *    | *    | * | 1 | 2 | C[339]EDC[330]GKLFTTSGNLKR                   | 1 |
| ZBT40_HUMAN (Q9NUA8) Zinc finger and BTB domain-containing protein 40 [MASS=138118]                                                                                                  | *    | 0.73 | *    | *    | * | 1 | 2 | EPGADAFFR                                    | 1 |
| ZCHC6_HUMAN (Q5VYS8) Zinc finger CCHC domain-containing protein 6 [MASS=171228]                                                                                                      | 0.00 | 2.68 | 0.13 | 0.00 | 1 | 2 | 3 | SGLEVDISLYNTLALHNTRLLSAYS AIDPR              | 1 |
|                                                                                                                                                                                      |      |      |      |      |   |   | 2 | SPTVVC[330]SLC[330]K                         | 1 |
| ZFP1_HUMAN (Q6P2D0) Zinc finger protein 1 homolog (Zfp-1) [MASS=47516]                                                                                                               | 0.00 | 5.16 | 0.17 | 3.12 | 2 | 1 | 3 | SYAGKQTDEC[330]NEFGKALLYLK                   | 3 |
| ZFP95_HUMAN (Q9Y2L8) Zinc finger protein 95 homolog (Zfp-95) [MASS=96903]                                                                                                            | 0.00 | 4.65 | 1.30 | 0.00 | 1 | 2 | 3 | MATPGAVQESC[339]SPHPLTVDTQPEQAPQK            | 1 |
|                                                                                                                                                                                      |      |      |      |      |   |   | 2 | MNYSEVPYVHK                                  | 1 |
| ZFY28_HUMAN (Q9HCC9) Zinc finger FYVE domain-containing protein 28 [MASS=96500]                                                                                                      | 0.00 | 2.59 | 0.23 | 0.00 | 1 | 1 | 3 | EKC[330]SPGGVIGASYAAGLAKASDR                 | 1 |
| ZFYV1_HUMAN (Q9HBF4) Zinc finger FYVE domain-containing protein 1 (Double FYVE-containing protein 1) (Tandem FYVE fingers-1) (SR3) [MASS=87175]                                      | *    | 5.66 | *    | *    | * | 2 | 3 | AIVRC[339]QTC[339]KINLC[339]LEC[330]QK       | 1 |
|                                                                                                                                                                                      |      |      |      |      |   |   | 3 | AVTSWLTDQIAPAYWRPNSQILSC[330]NK              | 1 |

|                                                                                                                |      |       |      |      |   |   |                                                                                                             |                  |   |
|----------------------------------------------------------------------------------------------------------------|------|-------|------|------|---|---|-------------------------------------------------------------------------------------------------------------|------------------|---|
| ZMYM3_HUMAN (Q14202) Zinc finger MYM-type protein 3 (Zinc finger protein 261) (DXS6673E protein) [MASS=152378] | 0.00 | 0.73  | 0.39 | 0.00 | 1 | 1 | 2                                                                                                           | RLVLESEC[330]SR  | 1 |
| ZN126_HUMAN (P35275) Zinc finger protein 126 (HZF-2) (Fragment) [MASS=11353]                                   | 0.00 | 9.18  | 1.18 | 0.00 | 1 | 1 | 3                                                                                                           | HSHLQC[330]HKR   | 1 |
| ZN197_HUMAN (O14709) Zinc finger protein 197 (ZnF20) [MASS=118847]                                             | 0.00 | 2.72  | 0.28 | 0.00 | 1 | 2 | 2 C[330]FILKKSLIGHQR<br>2 PSSSQRADSHKGTSK                                                                   | 1<br>1           |   |
| ZN236_HUMAN (Q9UL36) Zinc finger protein 236 [MASS=203659]                                                     | *    | 2.28  | *    | *    | * | 3 | 2 HM[147]KTHR<br>3 EENLIC[339]SEC[339]GDEFTLQSQLAVHMEEHR<br>1 HMATHM[147]SMK                                | 1<br>1<br>1      |   |
| ZN256_HUMAN (Q9Y2P7) Zinc finger protein 256 (Bone marrow zinc finger 3) (BMZF-3) [MASS=54872]                 | 0.00 | 2.74  | 3.82 | 0.00 | 1 | 1 | 2 SFSTSC[339]SLSDHLR                                                                                        | 1                |   |
| ZN263_HUMAN (O14978) Zinc finger protein 263 (Zinc finger protein FPM315) [MASS=77298]                         | 0.00 | 10.40 | 0.47 | 0.00 | 1 | 4 | 2 ESPSFKLEPM[147]ETERSPGPR<br>2 C[339]FSQNTHLTR<br>2 LYPFSEC[330]GEAVSDSTPFLTNHGAHK<br>2 SFSRSSHLLVIHERTHER | 1<br>1<br>1<br>1 |   |
| ZN407_HUMAN (Q9C0G0) Zinc finger protein 407 (Fragment) [MASS=126979]                                          | 0.00 | 1.55  | 0.06 | 0.00 | 1 | 1 | 3 M[147]YNC[330]PKC[330]DYGTVNPVEFR                                                                         | 1                |   |
| ZN462_HUMAN (Q96JM2) Zinc finger protein 462 [MASS=161529]                                                     | *    | 1.42  | *    | *    | * | 2 | 3 LGGYFTAVYADEHEK<br>1 HRDFK                                                                                | 1<br>1           |   |
| ZN471_HUMAN (Q9BX82) Zinc finger protein 471 (EZFIT-related protein 1) [MASS=73009]                            | 0.00 | 4.95  | 0.42 | 0.00 | 1 | 2 | 3 YTKFGKC[330]IHLENIEESIYNHTSDK<br>1 YNTSFIR                                                                | 1<br>1           |   |
| ZN484_HUMAN (Q5JVG2) Zinc finger protein 484 [MASS=98221]                                                      | 0.00 | 2.46  | 3.62 | 0.00 | 1 | 2 | 3 M[147]TKSLESVSFK<br>2 RPHNC[339]NSC[339]GK                                                                | 1<br>1           |   |
| ZN497_HUMAN (Q6ZNH5) Zinc finger protein 497 [MASS=54712]                                                      | 0.00 | 2.21  | 5.56 | 0.00 | 1 | 1 | 2 VHTGARPHAC[339]R                                                                                          | 1                |   |
| ZN513_HUMAN (Q8N8E2) Zinc finger protein 513 [MASS=51028]                                                      | 0.00 | 2.71  | 1.07 | 0.00 | 1 | 1 | 2 C[339]PYASAQLVNLTR                                                                                        | 1                |   |
| ZN518_HUMAN (Q6AHZ1) Zinc finger protein 518 [MASS=166781]                                                     | 0.00 | 0.88  | 8.98 | 0.00 | 1 | 1 | 2 C[330]HHVC[330]FTKGELQK                                                                                   | 1                |   |



3 EPC[339]VWARDVTGR 11

ZN540\_HUMAN (Q8NDQ6) Zinc finger protein  
540 [MASS=77093] \* 1.82 \* \* \* 1

ZN576\_HUMAN (Q9H609) Zinc finger protein  
576 [MASS=18890] 0.00 24.71 0.37 0.00 1 3

2 MEDPNPEENM[147]K 1  
1 SHGPAAK 1  
3 QQDSPKERSPQSPGGNIC[330]HLGAPK 1

ZN577\_HUMAN (Q9BSK1) Zinc finger protein  
577 [MASS=54156] 0.00 2.30 2.98 0.00 1 1

3 THTGERPYSC[339]R 1

ZN638\_HUMAN (Q14966) Zinc finger protein  
638 (Nuclear protein 220) (Zinc-finger matrin-  
like protein) (Cutaneous T-cell lymphoma-  
associated antigen se33-1) (CTCL tumor  
antigen se33-1) [MASS=220623] 0.00 3.54 0.89 0.00 1 4

2 MDAEKVEK 1  
2 APNPSGMRPPGPFM[147]RPGSMGLPR 1  
3 EQSLHYGSVLLITELPEDGC[330]TEEDVR 1  
2 M[147]DAEKVEKMAAM[147]K 1

ZN759\_HUMAN (Q8NAF0) Zinc finger protein  
579 [MASS=60479] \* 6.76 \* \* \* 2

2 RVHGPLSLLAPLPAAGKK 1  
3 APLPC[330]PTC[330]GRLFRFPYYLSR 1

ZNF44\_HUMAN (P15621) Zinc finger protein  
44 (Zinc finger protein KOX7) (Gonadotropin-  
inducible transcription repressor 2) (GIOT-2)  
[MASS=68102] 0.30 3.74 1.65 0.00 1 1

3 NLNC[339]IGM[147]KWENQNIDDQHQNLR 1

ZNF76\_HUMAN (P36508) Zinc finger protein  
76 [MASS=61830] 0.00 6.14 2.88 0.00 1 2

3 IHTGEKPYVC[339]TVPGC[339]GKR 1  
3 C[339]GYKGC[330]GRLYTTAHLK 1
